# Supplementary material for: QTL mapping of human retina DNA methylation identifies 87 gene-epigenome interactions in age-related macular degeneration
Source: Nat Commun. 2024 Mar 4;15:1972. doi: 10.1038/s41467-024-46063-8 (PMC10912779; doi:10.1038/s41467-024-46063-8)
Supplement: Supplementary file 4 — Supplementary Data 1 [file 41467_2024_46063_MOESM4_ESM.xlsx]

## Sheet: Sheet1
Unique_ID	ID	Collection Site	Entrance	Age	Postmortem_interval_hrs	Sex	MGS_level	Slide_ID	Array	QC
huRetina_ID_9	203808720125_R01C01	Munich	Feb_2010	44	61	M	1	203808720125	R01C01	Passed
huRetina_ID_11	203808720125_R02C01	Munich	Feb_2010	72	60	F	1	203808720125	R02C01	Passed
huRetina_ID_13	203808720125_R03C01	Munich	Feb_2010	43	8	M	1	203808720125	R03C01	Passed
huRetina_ID_14	203808720125_R04C01	Munich	Feb_2010	38	46	M	1	203808720125	R04C01	Passed
huRetina_ID_19	203808720125_R05C01	Munich	Apr_2010	50	30	F	1	203808720125	R05C01	Failed
huRetina_ID_20	203808720125_R06C01	Munich	Apr_2010	45	36	M	1	203808720125	R06C01	Passed
huRetina_ID_23	203808720125_R07C01	Munich	Apr_2010	61	20	M	1	203808720125	R07C01	Passed
huRetina_ID_24	203808720125_R08C01	Munich	Apr_2010	75	35	F	1	203808720125	R08C01	Passed
huRetina_ID_29	203810690033_R01C01	Munich	Apr_2010	50	30	F	1	203810690033	R01C01	Failed
huRetina_ID_34	203810690033_R02C01	Munich	Oct_2010	18	33	M	1	203810690033	R02C01	Passed
huRetina_ID_44	203810690033_R03C01	Munich	Oct_2010	54	22	M	1	203810690033	R03C01	Passed
huRetina_ID_48	203810690033_R05C01	Munich	Aug_2011	53	15	F	1	203810690033	R05C01	Passed
huRetina_ID_51	203810690033_R06C01	Munich	Aug_2011	43	21	M	1	203810690033	R06C01	Passed
huRetina_ID_52	203810690033_R07C01	Munich	Aug_2011	59	17	M	1	203810690033	R07C01	Passed
huRetina_ID_55	203810690033_R08C01	Munich	Sept_2012	76	24	F	1	203810690033	R08C01	Failed
huRetina_ID_58	203808720137_R01C01	Munich	Sept_2012	80	21	F	1	203808720137	R01C01	Failed
huRetina_ID_59	203808720137_R02C01	Munich	Sept_2012	63	21	M	1	203808720137	R02C01	Failed
huRetina_ID_61	203808720137_R03C01	Munich	Sept_2012	47	23	M	1	203808720137	R03C01	Passed
huRetina_ID_63	203808720137_R04C01	Munich	Sept_2012	72	27	F	1	203808720137	R04C01	Passed
huRetina_ID_65	203808720137_R05C01	Munich	Sept_2012	69	23	M	1	203808720137	R05C01	Passed
huRetina_ID_67	203808720137_R06C01	Munich	Sept_2012	72	16	F	1	203808720137	R06C01	Passed
huRetina_ID_69	203808720137_R07C01	Munich	Sept_2012	58	24	M	1	203808720137	R07C01	Failed
huRetina_ID_74	203808720137_R08C01	Munich	Sept_2012	69	23	M	1	203808720137	R08C01	Passed
huRetina_ID_77	203810690042_R01C01	Munich	Sept_2012	26	21	M	1	203810690042	R01C01	Passed
huRetina_ID_78	203810690042_R02C01	Munich	Sept_2012	34	24	M	1	203810690042	R02C01	Passed
huRetina_ID_81	203810690042_R03C01	Munich	Sept_2012	52	24	F	1	203810690042	R03C01	Passed
huRetina_ID_83	203810690042_R04C01	Munich	Sept_2012	44	22	M	1	203810690042	R04C01	Passed
huRetina_ID_84	203810690042_R05C01	Munich	Sept_2012	42	18	M	1	203810690042	R05C01	Passed
huRetina_ID_86	203810690042_R06C01	Munich	Sept_2012	43	20	M	1	203810690042	R06C01	Passed
huRetina_ID_87	203810690042_R07C01	Munich	Sept_2012	65	42	M	1	203810690042	R07C01	Passed
huRetina_ID_93	203810690042_R08C01	Munich	Mai_2013	61	13	M	1	203810690042	R08C01	Passed
huRetina_ID_96	203810690043_R01C01	Munich	Mai_2013	79	22	F	1	203810690043	R01C01	Failed
huRetina_ID_97	203810690043_R02C01	Munich	Mai_2013	72	21	M	1	203810690043	R02C01	Passed
huRetina_ID_101	203810690043_R03C01	Munich	Mai_2013	36	16	F	1	203810690043	R03C01	Passed
huRetina_ID_103	203810690043_R04C01	Munich	Mai_2013	70	25	F	1	203810690043	R04C01	Passed
huRetina_ID_104	203810690043_R05C01	Munich	Mai_2013	45	27	M	1	203810690043	R05C01	Passed
huRetina_ID_105	203810690043_R06C01	Munich	Mai_2013	55	23.5	M	1	203810690043	R06C01	Passed
huRetina_ID_106	203810690043_R07C01	Munich	Mai_2013	56	18	M	1	203810690043	R07C01	Passed
huRetina_ID_107	203810690043_R08C01	Munich	Mai_2013	75	29	F	1	203810690043	R08C01	Passed
huRetina_ID_109	203810640145_R01C01	Munich	Mai_2013	64	23	M	1	203810640145	R01C01	Passed
huRetina_ID_116	203810640145_R02C01	Munich	Mai_2013	78	22	M	1	203810640145	R02C01	Passed
huRetina_ID_121	203810640145_R03C01	Munich	Nov_2013	65	71	F	1	203810640145	R03C01	Passed
huRetina_ID_122	203810640145_R04C01	Munich	Nov_2013	50	20	M	1	203810640145	R04C01	Passed
huRetina_ID_124	203810640145_R05C01	Munich	Nov_2013	28	17	M	1	203810640145	R05C01	Passed
huRetina_ID_125	203810640145_R06C01	Munich	Nov_2013	65	27	M	1	203810640145	R06C01	Passed
huRetina_ID_127	203810640145_R07C01	Munich	Nov_2013	57	42	F	1	203810640145	R07C01	Passed
huRetina_ID_132	203810640145_R08C01	Cologne	2016	85	12	F	1	203810640145	R08C01	Passed
huRetina_ID_133	203810640146_R01C01	Cologne	2016	75	30	F	1	203810640146	R01C01	Passed
huRetina_ID_135	203810640146_R02C01	Cologne	2016	77	5	M	1	203810640146	R02C01	Passed
huRetina_ID_136	203810640146_R03C01	Cologne	2016	84	20	M	1	203810640146	R03C01	Passed
huRetina_ID_138	203810640146_R04C01	Cologne	2016	67	24	M	1	203810640146	R04C01	Passed
huRetina_ID_139	203810640146_R05C01	Cologne	2016	81	24	F	1	203810640146	R05C01	Passed
huRetina_ID_140	203810640146_R06C01	Cologne	2016	77	24	M	1	203810640146	R06C01	Passed
huRetina_ID_142	203810640146_R07C01	Cologne	2016	66	19	M	1	203810640146	R07C01	Passed
huRetina_ID_145	203810640146_R08C01	Cologne	2016	80	19	F	1	203810640146	R08C01	Passed
huRetina_ID_146	203810690071_R02C01	Cologne	2016	52	16	M	1	203810690071	R02C01	Passed
huRetina_ID_147	203810690071_R03C01	Cologne	2016	58	21	M	1	203810690071	R03C01	Passed
huRetina_ID_152	203810690071_R04C01	Cologne	2016	90	13	F	4	203810690071	R04C01	Passed
huRetina_ID_154	203810690071_R05C01	Cologne	2016	69	22	M	1	203810690071	R05C01	Passed
huRetina_ID_158	203810690071_R06C01	Cologne	2016	79	15	M	1	203810690071	R06C01	Passed
huRetina_ID_160	203810690071_R07C01	Cologne	2016	67	13	M	1	203810690071	R07C01	Passed
huRetina_ID_162	203810690071_R08C01	Cologne	2016	38	29	F	1	203810690071	R08C01	Passed
huRetina_ID_165	203810690033_R04C01	Cologne	2016	68	15	F	1	203810690033	R04C01	Failed
huRetina_ID_65R	203810690071_R01C01	Munich	Sept_2012	69	23	M	1	203810690071	R01C01	Passed
Retina_ID_68527	201876940096_R01C01	Bethesda	-	88	23.93	F	1	201876940096	R01C01	Passed
Retina_ID_66655	201876940096_R02C01	Bethesda	-	89	12.2	M	3	201876940096	R02C01	Passed
Retina_ID_66660	201876940096_R03C01	Bethesda	-	67	16.3	M	1	201876940096	R03C01	Passed
Retina_ID_68549	201876940096_R04C01	Bethesda	-	74	16.82	F	1	201876940096	R04C01	Passed
Retina_ID_68555	201876940096_R05C01	Bethesda	-	94	20.92	F	1	201876940096	R05C01	Passed
Retina_ID_68557	201876940096_R06C01	Bethesda	-	64	15.67	F	1	201876940096	R06C01	Passed
Retina_ID_68560	201876940096_R07C01	Bethesda	-	86	17	M	4	201876940096	R07C01	Passed
Retina_ID_68561	201876940096_R08C01	Bethesda	-	84	20.93	F	4	201876940096	R08C01	Passed
Retina_ID_68584	201870620087_R01C01	Bethesda	-	93	23.45	M	3	201870620087	R01C01	Passed
Retina_ID_68587	201870620087_R02C01	Bethesda	-	94	19.77	F	4	201870620087	R02C01	Passed
Retina_ID_68601	201870620087_R03C01	Bethesda	-	63	22.22	M	1	201870620087	R03C01	Passed
Retina_ID_66663	201870620087_R04C01	Bethesda	-	76	9.15	F	3	201870620087	R04C01	Passed
Retina_ID_68605	201870620087_R05C01	Bethesda	-	95	22.47	F	4	201870620087	R05C01	Passed
Retina_ID_68606	201870620087_R06C01	Bethesda	-	83	21.97	F	4	201870620087	R06C01	Passed
Retina_ID_68607	201870620087_R07C01	Bethesda	-	81	19.3	M	3	201870620087	R07C01	Passed
Retina_ID_68610	201870620087_R08C01	Bethesda	-	64	19.08	M	1	201870620087	R08C01	Passed
Retina_ID_68616	201876940110_R01C01	Bethesda	-	90	15.92	F	4	201876940110	R01C01	Passed
Retina_ID_68619	201876940110_R02C01	Bethesda	-	81	14.38	F	1	201876940110	R02C01	Passed
Retina_ID_68629	201876940110_R03C01	Bethesda	-	70	10.33	F	1	201876940110	R03C01	Passed
Retina_ID_68632	201876940110_R04C01	Bethesda	-	75	22.83	F	4	201876940110	R04C01	Passed
Retina_ID_68633	201876940110_R05C01	Bethesda	-	85	21.08	F	4	201876940110	R05C01	Passed
Retina_ID_68634	201876940110_R06C01	Bethesda	-	63	24.03	M	1	201876940110	R06C01	Passed
Retina_ID_66667	201876940110_R07C01	Bethesda	-	91	9.48	M	3	201876940110	R07C01	Passed
Retina_ID_68640	201876940110_R08C01	Bethesda	-	94	16.02	F	4	201876940110	R08C01	Passed
Retina_ID_68645	201876940242_R01C01	Bethesda	-	64	17.25	F	1	201876940242	R01C01	Passed
Retina_ID_68650	201876940242_R02C01	Bethesda	-	94	19.5	M	3	201876940242	R02C01	Passed
Retina_ID_68654	201876940242_R03C01	Bethesda	-	100	23.98	F	4	201876940242	R03C01	Passed
Retina_ID_68664	201876940242_R04C01	Bethesda	-	78	23.77	F	3	201876940242	R04C01	Passed
Retina_ID_68684	201876940242_R05C01	Bethesda	-	87	13.38	F	4	201876940242	R05C01	Passed
Retina_ID_68691	201876940242_R06C01	Bethesda	-	76	22.43	M	1	201876940242	R06C01	Passed
Retina_ID_66678	201876940242_R07C01	Bethesda	-	70	24.25	F	3	201876940242	R07C01	Passed
Retina_ID_68697	201876940242_R08C01	Bethesda	-	66	17.53	M	3	201876940242	R08C01	Passed
Retina_ID_68712	201876940209_R01C01	Bethesda	-	76	22.5	M	1	201876940209	R01C01	Passed
Retina_ID_68744	201876940209_R02C01	Bethesda	-	92	13.12	F	4	201876940209	R02C01	Passed
Retina_ID_66682	201876940209_R03C01	Bethesda	-	78	23.47	F	4	201876940209	R03C01	Passed
Retina_ID_66683	201876940209_R04C01	Bethesda	-	77	24.48	F	1	201876940209	R04C01	Passed
Retina_ID_68762	201876940209_R05C01	Bethesda	-	89	20.33	F	4	201876940209	R05C01	Passed
Retina_ID_68768	201876940209_R06C01	Bethesda	-	80	12.9	M	3	201876940209	R06C01	Passed
Retina_ID_68773	201876940209_R07C01	Bethesda	-	78	23.55	F	3	201876940209	R07C01	Passed
Retina_ID_68774	201876940209_R08C01	Bethesda	-	84	16.92	F	4	201876940209	R08C01	Passed
Retina_ID_68775	201876940243_R01C01	Bethesda	-	80	18.67	F	3	201876940243	R01C01	Passed
Retina_ID_68776	201876940243_R02C01	Bethesda	-	68	22.23	F	1	201876940243	R02C01	Passed
Retina_ID_68780	201876940243_R03C01	Bethesda	-	76	21.33	M	1	201876940243	R03C01	Passed
Retina_ID_68781	201876940243_R04C01	Bethesda	-	71	22.58	M	1	201876940243	R04C01	Passed
Retina_ID_68783	201876940243_R05C01	Bethesda	-	78	11.83	F	4	201876940243	R05C01	Passed
Retina_ID_68788	201876940243_R06C01	Bethesda	-	87	27.08	M	3	201876940243	R06C01	Passed
Retina_ID_68789	201876940243_R07C01	Bethesda	-	89	19.83	F	4	201876940243	R07C01	Passed
Retina_ID_68791	201876940243_R08C01	Bethesda	-	86	8	M	4	201876940243	R08C01	Passed
Retina_ID_68796	201876940195_R01C01	Bethesda	-	66	22.72	F	1	201876940195	R01C01	Passed
Retina_ID_68797	201876940195_R02C01	Bethesda	-	70	22.58	F	1	201876940195	R02C01	Passed
Retina_ID_68800	201876940195_R03C01	Bethesda	-	78	11.93	M	1	201876940195	R03C01	Passed
Retina_ID_68807	201876940195_R04C01	Bethesda	-	68	22.38	M	1	201876940195	R04C01	Passed
Retina_ID_68811	201876940195_R05C01	Bethesda	-	76	20.75	M	1	201876940195	R05C01	Passed
Retina_ID_68813	201876940195_R06C01	Bethesda	-	76	23.78	M	1	201876940195	R06C01	Passed
Retina_ID_68821	201876940195_R07C01	Bethesda	-	88	20.72	F	4	201876940195	R07C01	Passed
Retina_ID_68822	201876940195_R08C01	Bethesda	-	73	12.18	F	1	201876940195	R08C01	Passed
Retina_ID_68833	201870620120_R01C01	Bethesda	-	84	16.88	M	1	201870620120	R01C01	Passed
Retina_ID_68837	201870620120_R02C01	Bethesda	-	62	19.45	M	1	201870620120	R02C01	Passed
Retina_ID_68838	201870620120_R03C01	Bethesda	-	82	6.38	F	1	201870620120	R03C01	Passed
Retina_ID_68839	201870620120_R04C01	Bethesda	-	70	23.97	F	1	201870620120	R04C01	Passed
Retina_ID_68840	201870620120_R05C01	Bethesda	-	87	23.95	F	1	201870620120	R05C01	Passed
Retina_ID_68873	201870620120_R06C01	Bethesda	-	86	14.2	F	1	201870620120	R06C01	Passed
Retina_ID_66691	201870620120_R07C01	Bethesda	-	81	17.97	M	3	201870620120	R07C01	Passed
Retina_ID_68878	201870620120_R08C01	Bethesda	-	62	20.8	M	1	201870620120	R08C01	Passed
Retina_ID_68880	201870620036_R01C01	Bethesda	-	74	7.32	F	3	201870620036	R01C01	Passed
Retina_ID_105638	201870620036_R02C01	Bethesda	-	94	11.43	F	4	201870620036	R02C01	Passed
Retina_ID_105639	201870620036_R03C01	Bethesda	-	87	19.28	M	4	201870620036	R03C01	Passed
Retina_ID_105642	201870620036_R04C01	Bethesda	-	90	20.85	F	4	201870620036	R04C01	Passed
Retina_ID_105643	201870620036_R05C01	Bethesda	-	96	19.45	F	3	201870620036	R05C01	Passed
Retina_ID_105644	201870620036_R06C01	Bethesda	-	82	20.35	F	3	201870620036	R06C01	Passed
Retina_ID_105649	201870620036_R07C01	Bethesda	-	102	22.78	F	4	201870620036	R07C01	Passed
Retina_ID_105651	201870620036_R08C01	Bethesda	-	90	11.87	M	3	201870620036	R08C01	Passed
Retina_ID_105659	201876940006_R01C01	Bethesda	-	90	15.28	M	3	201876940006	R01C01	Passed
Retina_ID_105660	201876940006_R02C01	Bethesda	-	81	16.7	M	1	201876940006	R02C01	Passed
Retina_ID_105662	201876940006_R03C01	Bethesda	-	91	11.68	F	3	201876940006	R03C01	Passed
Retina_ID_105623	201876940006_R04C01	Bethesda	-	96	23.67	M	4	201876940006	R04C01	Passed
Retina_ID_105663	201876940006_R05C01	Bethesda	-	88	8.98	F	1	201876940006	R05C01	Passed
Retina_ID_105664	201876940006_R06C01	Bethesda	-	79	22.05	F	3	201876940006	R06C01	Passed
Retina_ID_105665	201876940006_R07C01	Bethesda	-	89	16.93	M	1	201876940006	R07C01	Passed
Retina_ID_105667	201876940006_R08C01	Bethesda	-	99	16.75	F	4	201876940006	R08C01	Passed
Retina_ID_105624	201870610135_R01C01	Bethesda	-	92	9.35	F	3	201870610135	R01C01	Passed
Retina_ID_105668	201870610135_R02C01	Bethesda	-	86	17.75	F	3	201870610135	R02C01	Passed
Retina_ID_105671	201870610135_R03C01	Bethesda	-	89	17.65	F	3	201870610135	R03C01	Passed
Retina_ID_105672	201870610135_R04C01	Bethesda	-	63	23.1	M	1	201870610135	R04C01	Passed
Retina_ID_105676	201870610135_R05C01	Bethesda	-	67	23.97	F	1	201870610135	R05C01	Passed
Retina_ID_105677	201870610135_R06C01	Bethesda	-	89	22.32	F	1	201870610135	R06C01	Passed
Retina_ID_105625	201870610135_R07C01	Bethesda	-	64	20.02	M	3	201870610135	R07C01	Passed
Retina_ID_105679	201870610135_R08C01	Bethesda	-	91	18.42	F	3	201870610135	R08C01	Passed
Retina_ID_105680	201870620119_R01C01	Bethesda	-	95	23.6	M	4	201870620119	R01C01	Passed
Retina_ID_105682	201870620119_R02C01	Bethesda	-	88	23.5	M	1	201870620119	R02C01	Passed
Retina_ID_105690	201870620119_R03C01	Bethesda	-	68	24	M	1	201870620119	R03C01	Passed
Retina_ID_105685	201870620119_R04C01	Bethesda	-	89	16.9	F	3	201870620119	R04C01	Passed
Retina_ID_105686	201870620119_R05C01	Bethesda	-	101	20.55	F	4	201870620119	R05C01	Passed
Retina_ID_105627	201870620119_R06C01	Bethesda	-	94	17.35	F	4	201870620119	R06C01	Passed
Retina_ID_105692	201870620119_R07C01	Bethesda	-	75	20.72	F	1	201870620119	R07C01	Passed
Retina_ID_105629	201870620119_R08C01	Bethesda	-	81	21.93	F	3	201870620119	R08C01	Passed
