# Supplementary material for: QTL mapping of human retina DNA methylation identifies 87 gene-epigenome interactions in age-related macular degeneration
Source: Nat Commun. 2024 Mar 4;15:1972. doi: 10.1038/s41467-024-46063-8 (PMC10912779; doi:10.1038/s41467-024-46063-8)
Supplement: Supplementary file 7 — Supplementary Data 4 [file 41467_2024_46063_MOESM7_ESM.xlsx]

## Sheet: Sheet1
Resource	Gene set	Gene set size	# significant mGenes	Fraction of genes that are mGenes	Hypergeometric p-value	Empirical gene set enrichment p-value	Benjamini Hochberg adjusted p-value (FDR)	Pass nominal significance	Pass BH significance (FDR<0.05)	Significant mGenes
GO_BP	CELL_CELL_ADHESION_VIA_PLASMA_MEMBRANE_ADHESION_MOLECULES	101	47	0.47	4.77e-07	1e-05	0.0119	TRUE	TRUE	CLDN4;PCDHGA9;PCDHGA4;BSG;ATP2C1;ITGB1;MBP;DSCAM;CDHR3;DSCAML1;PTPN23;CD6;SELL;CD164;SDK1;PCDHGA3;IGSF11;PCDHB5;PCDHGB6;PCDHGB5;PCDHGB3;PCDHGB2;PCDHGB1;PCDHGA7;PCDHGA6;PCDHGA5;PCDHGA2;PCDHGA1;PCDHB11;PCDHB6;PCDHB4;PCDHB3;PCDHA8;PCDHA7;PCDHA6;PCDHA5;PCDHA4;PCDHA3;PCDHA2;PCDHA1;PCDHB16;IGSF21;PCDHGB4;PCDHGA8;CLSTN3;FGFRL1;MPZ
GO_BP	HOMOPHILIC_CELL_ADHESION_VIA_PLASMA_MEMBRANE_ADHESION_MOLECULES	74	39	0.53	7.38e-08	1e-05	0.0119	TRUE	TRUE	PCDHGA9;PCDHGA4;BSG;ITGB1;DSCAM;CDHR3;DSCAML1;PTPN23;SDK1;PCDHGA3;IGSF11;PCDHB5;PCDHGB6;PCDHGB5;PCDHGB3;PCDHGB2;PCDHGB1;PCDHGA7;PCDHGA6;PCDHGA5;PCDHGA2;PCDHGA1;PCDHB11;PCDHB6;PCDHB4;PCDHB3;PCDHA8;PCDHA7;PCDHA6;PCDHA5;PCDHA4;PCDHA3;PCDHA2;PCDHA1;PCDHB16;IGSF21;PCDHGB4;PCDHGA8;CLSTN3
GO_BP	ACTIN_FILAMENT_BASED_PROCESS	277	99	0.36	4.14e-06	2e-05	0.0119	TRUE	TRUE	MTOR;ANG;RACGAP1;ANXA1;PDGFRA;TLE6;MKKS;SLIT2;ATP2C1;TRPM2;CUL3;NEDD4L;SMAD3;AKAP13;F2RL1;TNIK;DBNL;HRAS;JAK2;LRP1;NF1;NPHS1;SPTBN5;PRKCE;RASA1;SDCBP;SHC1;SPTBN1;CFLAR;S1PR2;ROCK2;CRK;GAS2L1;EFNA5;FER;CLASP1;CDK5R1;ARHGEF10;MCU;SORBS1;TPM1;COBL;DLC1;CDC42EP2;BAIAP2;PACSIN2;FGD4;FAM171A1;KANK1;SIPA1L1;CYFIP2;PACSIN1;HCK;EVL;PIK3R1;FAM206A;FGD6;BIN3;CAPZB;DTNBP1;ARHGAP44;INPPL1;ANK2;CACNA2D1;BAG4;B…
GO_BP	REGULATION_OF_GTPASE_ACTIVITY	195	72	0.37	2.53e-05	2e-05	0.0119	TRUE	TRUE	MTOR;RACGAP1;MKKS;SLIT2;JUN;ITGB1;DVL2;ERBB2;F2RL1;ARHGAP8;RASGRP3;HRAS;NF1;RASA1;TIAM1;CRK;EFNA5;STMN3;RANBP1;TBCD;ARHGEF10;DNM1L;DLC1;CDC42EP2;ARHGAP33;FGD4;DOCK1;PLXND1;SIPA1L1;LIMS1;FGD6;ALS2;DOCK5;ARHGEF7;ARHGAP44;SH3BP4;LARS;SIPA1;PTPRN2;RUNDC1;ARHGEF19;PRKG1;VAV2;RAPGEF3;TNK2;SEC23A;ARFGAP3;ARHGEF11;AGRN;GNB5;NPRL2;USP6;TBC1D9B;TBC1D14;GRTP1;RANBP3;USP6NL;RABGAP1L;TBC1D20;ARHGAP27;ABR;ITGA…
GO_BP	ACTIN_FILAMENT_ORGANIZATION	153	59	0.39	3.18e-05	3e-05	0.0119	TRUE	TRUE	MTOR;ANG;TLE6;MKKS;SLIT2;CUL3;SMAD3;F2RL1;DBNL;JAK2;NPHS1;SPTBN5;PRKCE;RASA1;SPTBN1;ROCK2;GAS2L1;FER;CLASP1;ARHGEF10;MCU;SORBS1;TPM1;COBL;DLC1;CDC42EP2;BAIAP2;FAM171A1;KANK1;CYFIP2;PACSIN1;HCK;EVL;PIK3R1;FAM206A;BIN3;CAPZB;INPPL1;BAG4;BCAR1;BRK1;TCAP;ARPC5;RAPGEF3;KIAA1211;PPM1E;GMFB;ARPC4;MYO1C;WIPF1;ADD2;MTPN;TPM3;MICAL3;MYO1B;ARHGEF10L;NEBL;MYO15A;FCHSD1
GO_BP	CELL_CELL_ADHESION	296	103	0.35	1.03e-05	3e-05	0.0119	TRUE	TRUE	CLDN4;EGFR;ANXA1;PDGFRA;PCDHGA9;PCDHGA4;PTAFR;BMP4;ZFP36L1;BSG;CASP3;CD9;NDFIP1;ATP2C1;MAD1L1;PTPN2;RUNX1;ITGB1;PKHD1;DLG2;DUSP3;ERBB2;GCNT2;JAK2;MBP;NPHS1;SHC1;EFNA5;FER;CDK5R1;FUT9;ANK3;CYP1B1;BAIAP2;DSCAM;CDHR3;CYFIP2;ITGA7;LIMS1;NRCAM;PIK3R1;LIMS2;DSCAML1;NTN1;JAG1;ALOX5;PTPN23;MIA3;LGALS1;ASTN2;PRKG1;CD6;HSPH1;SELL;SELPLG;NFKBIZ;CARD11;MEGF10;CD58;TJP2;PAK4;KIRREL2;NLGN2;ADD2;CD164;GOLPH3;PE…
GO_BP	BIOLOGICAL_ADHESION	495	164	0.33	7.96e-07	3e-05	0.0119	TRUE	TRUE	CLDN4;DUSP1;EGFR;ADAM32;ANXA1;ITGA3;ITGB4;MFGE8;MMP14;PDGFRA;PCDHGA9;PCDHGA4;PTAFR;BMP4;ZFP36L1;BSG;C1QBP;CASP3;CD9;NDFIP1;RPSA;ATP2C1;MAD1L1;HES5;SMAD3;ZFHX3;PTPN2;RUNX1;ITGB1;PKHD1;DLG2;DUSP3;ERBB2;GCNT2;JAK2;LRP1;MBP;NF1;NPHS1;PRKCE;RASA1;SHC1;TIAM1;ROCK2;CRK;EFNA5;FER;CLASP1;DISC1;PARD3;TBCD;CDK5R1;SORBS1;FUT9;PPP1CB;MAEA;ANK3;ADAM17;CYP1B1;TPM1;DLC1;BAIAP2;DOCK1;DSCAM;CDHR3;PLXND1;KANK1;CYFI…
GO_BP	DENDRITE_DEVELOPMENT	91	40	0.44	1.88e-05	3e-05	0.0119	TRUE	TRUE	MTOR;FBXW8;STK11;NEURL1;FBXO31;CUX1;NEDD4L;BCL11A;TNIK;ALK;DBNL;TIAM1;CRK;DISC1;MAP2;CDK5R1;DNM1L;LZTS1;RBFOX2;COBL;ARHGAP33;DSCAM;DIP2A;ARC;SIPA1L1;EEF2K;PACSIN1;FAM206A;GORASP1;TRAK2;DTNBP1;LLPH;KNDC1;NTN1;ARHGAP44;PRKG1;PAK4;CAMK1D;SDK1;FOXO6
GO_BP	SYNAPTIC_SIGNALING	263	90	0.34	7.65e-05	5e-05	0.0158	TRUE	TRUE	PARK7;EGFR;RIMS1;MTOR;GABRB1;CELF4;NEURL1;KPNA2;SLC30A1;EIF2AK4;SLC1A4;ITGB1;DLG2;GRIK2;GRM4;HRAS;JAK2;MBP;PRKCE;SDCBP;S1PR2;AKAP12;EIF4A3;DISC1;TUBB2B;CDK5R1;DNM1L;LZTS1;YWHAG;ADARB1;PACSIN2;UNC13A;ARC;SIPA1L1;BDNF;DTNBP1;PENK;SLC1A6;CPLX1;DAGLB;GABRA2;GAD1;PNKD;ERC2;KCNMB4;APBA1;PTPRN2;NAPB;LIN7B;SYN2;DNAJC5;CADPS;BAIAP3;PREPL;SLC8A2;ITPR3;PRKAR1B;SLC8A3;NLGN2;ASIC2;FGF14;OPRK1;CHRM2;CHRNE;HRH1…
GO_BP	POSITIVE_REGULATION_OF_GTPASE_ACTIVITY	161	58	0.36	0.000327	5e-05	0.0158	TRUE	TRUE	RACGAP1;JUN;ITGB1;DVL2;ERBB2;F2RL1;ARHGAP8;RASGRP3;HRAS;NF1;RASA1;TIAM1;CRK;RANBP1;TBCD;ARHGEF10;DNM1L;DLC1;CDC42EP2;ARHGAP33;DOCK1;SIPA1L1;LIMS1;ALS2;DOCK5;ARHGEF7;ARHGAP44;LARS;SIPA1;RUNDC1;ARHGEF19;RAPGEF3;SEC23A;ARFGAP3;ARHGEF11;AGRN;GNB5;NPRL2;USP6;TBC1D9B;TBC1D14;GRTP1;RANBP3;USP6NL;RABGAP1L;TBC1D20;ARHGAP27;ABR;ITGA6;ARHGAP10;ARHGEF10L;RGS12;RGS6;GIT2;RALGAPA1;ARHGAP5;ARHGAP31;AGAP1
GO_BP	ACTIN_POLYMERIZATION_OR_DEPOLYMERIZATION	82	34	0.41	0.000311	0.00012	0.0346	TRUE	TRUE	MTOR;ANG;MKKS;SLIT2;F2RL1;DBNL;JAK2;NPHS1;SPTBN5;PRKCE;RASA1;SPTBN1;FER;COBL;CDC42EP2;BAIAP2;KANK1;CYFIP2;HCK;EVL;FAM206A;CAPZB;BAG4;BRK1;ARPC5;KIAA1211;GMFB;ARPC4;MYO1C;WIPF1;ADD2;MTPN;MICAL3;FCHSD1
GO_BP	SIGNAL_RELEASE	155	57	0.37	0.000197	0.00017	0.0449	TRUE	TRUE	PARK7;EGFR;RIMS1;GDF9;ANXA1;HIF1A;PTPRN;SLC2A1;UCP2;CLOCK;TFR2;SLC30A1;SOX11;SREBF1;TFAP2B;F2RL1;GRM4;JAK2;LRP1;PRKCE;RAF1;TIAM1;EFNA5;DNM1L;MCU;LRP5;UNC13A;DTNBP1;ALOX5;CPLX1;GAD1;PNKD;ERC2;KCNMB4;APBA1;PTPRN2;NAPB;LIN7B;SYN2;DNAJC5;CADPS;BAIAP3;PREPL;PTPN23;PCK2;ITPR2;ITPR3;PFKL;RAPGEF3;NLGN2;UQCC2;SLC8B1;CAPN10;ABCA1;GLUD1;LTBP4;CACNA2D2
GO_BP	PEPTIDE_HORMONE_SECRETION	83	35	0.42	0.000171	0.0002	0.0453	TRUE	TRUE	PARK7;EGFR;ANXA1;HIF1A;PTPRN;SLC2A1;UCP2;CLOCK;TFR2;SREBF1;TFAP2B;JAK2;LRP1;PRKCE;RAF1;TIAM1;EFNA5;MCU;LRP5;ALOX5;CPLX1;PTPRN2;BAIAP3;PCK2;ITPR2;ITPR3;PFKL;RAPGEF3;NLGN2;UQCC2;SLC8B1;CAPN10;GLUD1;LTBP4;CACNA2D2
GO_BP	REGULATION_OF_DENDRITE_DEVELOPMENT	38	20	0.53	0.00012	0.0002	0.0453	TRUE	TRUE	FBXW8;STK11;FBXO31;CUX1;NEDD4L;BCL11A;TNIK;ALK;DBNL;TIAM1;CRK;DNM1L;LZTS1;COBL;SIPA1L1;EEF2K;PACSIN1;GORASP1;KNDC1;CAMK1D
GO_CC	GOLGI_APPARATUS	640	194	0.3	8.09e-05	3e-05	0.0129	TRUE	TRUE	GOLT1A;FBXW8;CUL3;TNKS;TRAPPC8;SH3GLB1;CLASP1;TRAPPC12;PKHD1;PSEN2;CUX1;ESR1;ATF6;NFE2L2;SREBF1;SREBF2;RMDN2;USO1;RSAD2;BSG;FGD4;DBNL;FGD6;CNGB1;VCAN;MCOLN1;SLC2A1;SPEF2;AGRN;P3H2;TBC1D20;EGFR;ATP11B;MTOR;IGF2R;SLC30A1;VAPA;EI24;WWOX;GOLGA3;FAM134B;MIF4GD;KIAA0319L;PARP10;CBFA2T3;DNM1L;RAB38;ARSB;PI4K2A;PRKCE;RAF1;PERP;GOLPH3;CHPF;DNAJC5;ABCG1;FEZ1;TRIM3;VAMP5;OSBPL9;CLVS1;F2RL1;NMNAT2;ATP11A;NED…
GO_MF	NUCLEOSIDE_TRIPHOSPHATASE_REGULATOR_ACTIVITY	212	76	0.36	5.16e-05	2e-05	0.0108	TRUE	TRUE	THG1L;HSPH1;BAG5;BAG4;JUN;ARHGEF11;DNAJB4;DNAJB1;DNAJC10;RASA1;VAV2;LARS;EEF1B2;RIMS1;ARHGEF28;EIF2B5;FGD4;DNM1L;GNB5;AGAP1;ARHGAP5;RGS12;RGS6;USP6;TNK2;NPRL2;AKAP13;SLIT2;ATPIF1;RAPGEF3;DOCK1;RGL1;MCF2L;RASGRP3;ABR;LAMTOR4;FGD6;ALS2;RAB3IL1;TIAM1;DOCK5;MADD;ARHGEF7;HERC2;CYTH1;ARHGEF10;SH3BP4;GPSM1;RANBP1;DLC1;CDC42EP2;SEC23A;ARHGAP33;ARHGEF19;TBC1D20;RUNDC1;ARHGAP27;TBC1D9B;ARHGAP8;RALGAPA1;SIP…
GO_MF	CALCIUM_ION_BINDING	242	88	0.36	6.89e-06	4e-05	0.0108	TRUE	TRUE	UNC13A;BAIAP3;LRP1;NECAB2;ANXA6;SELL;CDK5R1;AGRN;ANXA1;EEF2K;PCDHGA9;CCDC47;CRELD1;CRELD2;SULF2;RHBDL3;CAPN3;LPL;ENPP2;ENPP3;MAN1A2;MAN1C1;PLCH1;PLA2G4C;LTBP1;LTBP4;PROS1;SLIT2;RASGRP3;TBC1D9B;JAG1;SNED1;S100A13;VCAN;EFEMP2;SPARC;SLC25A24;ITPR2;ITPR3;STIM2;TRPM2;KCNIP4;EGFLAM;MICU2;CDHR3;ASTN2;PCDHB5;HPCAL1;LTBP3;EPDR1;PCDHGB6;PCDHGB5;PCDHGB3;PCDHGB2;PCDHGB1;PCDHGA7;PCDHGA6;PCDHGA5;PCDHGA4;PCDHGA…
GO_MF	ENZYME_REGULATOR_ACTIVITY	464	145	0.31	0.000117	6e-05	0.0108	TRUE	TRUE	THG1L;RPTOR;STK11;HSPH1;BAG5;BAG4;ESR1;JUN;ZEB2;ARHGEF11;DNAJB4;DNAJB1;DNAJC10;PIK3R1;RASA1;VAV2;LPA;SERPINA5;PARK7;CASP3;CFLAR;CDK5R1;LARS;ANXA1;EGFR;CCNT1;EEF1B2;RIMS1;ARHGEF28;YWHAG;EIF2B5;FGD4;GMFB;DBNL;PRKCE;PHACTR2;DNM1L;GNB5;AGAP1;TRIM23;ARHGAP5;RGS12;RGS6;PDE6G;PITRM1;MMP17;PSMD2;CAPN3;CASP9;PAPLN;USP6;TNK2;NPRL2;AKAP13;ALK;RAF1;PPP2R1B;CDKN2D;PKIG;ELFN2;WFDC3;FAF2;GAPDH;IBTK;PPP1R37;APLP…
GO_MF	GTPASE_ACTIVATOR_ACTIVITY	118	45	0.38	0.000375	0.00035	0.0473	TRUE	TRUE	JUN;ARHGEF11;RASA1;LARS;DNM1L;GNB5;AGAP1;ARHGAP5;RGS12;RGS6;USP6;NPRL2;DOCK1;RASGRP3;ABR;ALS2;DOCK5;RANBP1;DLC1;CDC42EP2;SEC23A;ARHGAP33;ARHGEF19;TBC1D20;RUNDC1;ARHGAP27;TBC1D9B;ARHGAP8;RALGAPA1;SIPA1L1;ARFGAP3;RACGAP1;NF1;ARHGEF10L;ARHGAP31;TBC1D14;SIPA1;TBCD;ARHGAP10;GRTP1;RANBP3;USP6NL;GIT2;RABGAP1L;ARHGAP44
