# Supplementary material for: QTL mapping of human retina DNA methylation identifies 87 gene-epigenome interactions in age-related macular degeneration
Source: Nat Commun. 2024 Mar 4;15:1972. doi: 10.1038/s41467-024-46063-8 (PMC10912779; doi:10.1038/s41467-024-46063-8)
Supplement: Supplementary file 8 — Supplementary Data 5 [file 41467_2024_46063_MOESM8_ESM.xlsx]

## Sheet: eGenes_GO
Resource	Gene set	Gene set size	# significant eGenes	Fraction of genes that are eGenes	Hypergeometric p-value	Empirical gene set enrichment p-value	Benjamini Hochberg adjusted p-value (FDR)	Pass nominal significance	Pass BH significance (FDR<0.05)	Significant eGenes
GO_CC	COLLAGEN_CONTAINING_EXTRACELLULAR_MATRIX	188	43	0.23	2.21e-07	0	0	TRUE	TRUE	EFEMP2;LTBP1;SERPINA5;ICAM1;LGALS3;COL4A2;COL4A4;COL5A2;COL8A1;COL8A2;COL9A3;DCN;COL24A1;SCARA3;NID2;RELL2;HSPG2;AGRN;SERPINF1;SPARC;CTSH;CTSS;APOE;CTSC;CTSZ;SERPINC1;WNT5A;CTGF;SFRP1;ANXA5;F13A1;MMRN1;LGALS3BP;S100A8;FBLN5;FBLN2;EFEMP1;SSC5D;SERPINB8;SFRP2;BMP7;ZP3;CRELD1
GO_CC	EXTERNAL_ENCAPSULATING_STRUCTURE	241	51	0.21	2.25e-07	1e-05	0.00214	TRUE	TRUE	EFEMP2;LTBP1;SERPINA5;ICAM1;LGALS3;COL4A2;COL4A4;COL5A2;COL8A1;COL8A2;COL9A3;DCN;COL24A1;SCARA3;COLEC12;NID2;RELL2;HSPG2;AGRN;SERPINF1;SPARC;CTSH;CTSS;APOE;CTSC;CTSZ;ADAMTS7;SERPINC1;WNT5A;ADAMTSL1;CTGF;SFRP1;ANXA5;CRISPLD2;F13A1;MMRN1;LGALS3BP;S100A8;FBLN5;FBLN2;EFEMP1;SSC5D;MMP17;MMP19;LRRC24;SERPINB8;SFRP2;BMP7;ZP3;CRELD1;DGCR6
GO_CC	EXTRINSIC_COMPONENT_OF_PLASMA_MEMBRANE	79	21	0.27	2.86e-05	2e-05	0.00285	TRUE	TRUE	RAC1;GNA11;SNAP25;KRAS;DNAJA3;HCK;DLG4;APC2;FES;KCNAB2;STAC3;GNA12;CDH10;CDH11;CDH22;MYZAP;CDH23;SYK;GNG7;SYTL2;SYTL3
GO_CC	ENDOPLASMIC_RETICULUM_LUMEN	131	27	0.21	0.000272	0.00024	0.0256	TRUE	TRUE	LTBP1;COL4A2;COL4A4;COL5A2;COL8A1;COL8A2;COL9A3;COL24A1;APOE;CTSC;CTSZ;PRSS23;ADAMTS7;ERP27;SELENOM;EDN1;HRC;ARSI;SERPINC1;DNAJB11;CYP2W1;ERAP2;SPP1;WFS1;WNT5A;STC2;ADAMTSL1
GO_MF	EXTRACELLULAR_MATRIX_STRUCTURAL_CONSTITUENT	75	20	0.27	6.63e-05	6e-05	0.0367	TRUE	TRUE	HSPG2;AGRN;DCN;CRELD1;EFEMP1;LTBP1;FBLN5;ZP3;COL4A2;COL4A4;COL5A2;COL8A1;COL8A2;COL9A3;FBLN2;NID2;MMRN1;COL24A1;EFEMP2;SPARC
