# Supplementary material for: QTL mapping of human retina DNA methylation identifies 87 gene-epigenome interactions in age-related macular degeneration
Source: Nat Commun. 2024 Mar 4;15:1972. doi: 10.1038/s41467-024-46063-8 (PMC10912779; doi:10.1038/s41467-024-46063-8)
Supplement: Supplementary file 9 — Supplementary Data 6 [file 41467_2024_46063_MOESM9_ESM.xlsx]

## Sheet: mCpGs
CpG	chr	CpG_start	CpG_end	Present in Adipose	Present in Blood	Present in Endometrium	Present in Frontal cortex	Present in Skeletal muscle	Retina_specific
cg00043324	chr1	247032516	247032515	TRUE	TRUE	TRUE	TRUE	FALSE	FALSE
cg00053851	chr1	226082742	226082741	TRUE	FALSE	TRUE	TRUE	TRUE	FALSE
cg00060374	chr1	1419856	1419855	TRUE	TRUE	TRUE	TRUE	FALSE	FALSE
cg00063077	chr1	100895097	100895096	TRUE	TRUE	TRUE	TRUE	TRUE	FALSE
cg00102166	chr1	42959667	42959666	TRUE	TRUE	FALSE	TRUE	TRUE	FALSE
cg00114966	chr1	197924791	197924790	TRUE	TRUE	TRUE	TRUE	FALSE	FALSE
cg00321850	chr1	175193262	175193261	TRUE	TRUE	TRUE	TRUE	FALSE	FALSE
cg00329300	chr1	161038673	161038672	TRUE	FALSE	FALSE	TRUE	FALSE	FALSE
cg00349061	chr1	26045375	26045374	TRUE	TRUE	TRUE	TRUE	TRUE	FALSE
cg00446235	chr1	161038855	161038854	TRUE	FALSE	TRUE	TRUE	FALSE	FALSE
cg00605270	chr1	27935042	27935041	TRUE	TRUE	FALSE	TRUE	TRUE	FALSE
cg00750606	chr1	20572629	20572628	TRUE	TRUE	TRUE	TRUE	FALSE	FALSE
cg00813993	chr1	26318003	26318002	TRUE	TRUE	FALSE	TRUE	TRUE	FALSE
cg00859178	chr1	162497419	162497418	TRUE	TRUE	TRUE	TRUE	TRUE	FALSE
cg00864860	chr1	7847937	7847936	TRUE	FALSE	FALSE	TRUE	TRUE	FALSE
cg00909806	chr1	212515421	212515420	TRUE	TRUE	TRUE	TRUE	TRUE	FALSE
cg00911446	chr1	7460020	7460019	TRUE	FALSE	TRUE	TRUE	TRUE	FALSE
cg00945666	chr1	161020476	161020475	TRUE	TRUE	TRUE	TRUE	FALSE	FALSE
cg00956142	chr1	28438521	28438520	TRUE	FALSE	FALSE	TRUE	FALSE	FALSE
cg00996827	chr1	2922241	2922240	TRUE	TRUE	TRUE	TRUE	FALSE	FALSE
cg01022117	chr1	201289153	201289152	TRUE	TRUE	TRUE	TRUE	TRUE	FALSE
cg01200585	chr1	228174743	228174742	TRUE	TRUE	TRUE	TRUE	TRUE	FALSE
cg01401694	chr1	53889888	53889887	TRUE	TRUE	TRUE	TRUE	FALSE	FALSE
cg01427815	chr1	165842748	165842747	TRUE	TRUE	TRUE	TRUE	TRUE	FALSE
cg01444397	chr1	7784391	7784390	TRUE	FALSE	TRUE	TRUE	FALSE	FALSE
cg01517571	chr1	54624287	54624286	TRUE	TRUE	TRUE	TRUE	TRUE	FALSE
cg01561528	chr1	156623907	156623906	TRUE	TRUE	FALSE	TRUE	FALSE	FALSE
cg01567173	chr1	239955051	239955050	TRUE	TRUE	TRUE	TRUE	TRUE	FALSE
cg01594290	chr1	42145716	42145715	TRUE	FALSE	TRUE	TRUE	TRUE	FALSE
cg01821018	chr1	58577609	58577608	TRUE	TRUE	TRUE	TRUE	TRUE	FALSE
cg01934756	chr1	42887073	42887072	TRUE	TRUE	TRUE	TRUE	FALSE	FALSE
cg01949993	chr1	183185982	183185981	TRUE	TRUE	TRUE	TRUE	FALSE	FALSE
cg02104434	chr1	247531105	247531104	TRUE	TRUE	TRUE	TRUE	FALSE	FALSE
cg02138082	chr1	1043194	1043193	TRUE	TRUE	TRUE	TRUE	FALSE	FALSE
cg02331910	chr1	153627356	153627355	TRUE	TRUE	TRUE	TRUE	TRUE	FALSE
cg02567750	chr1	247406304	247406303	TRUE	TRUE	TRUE	TRUE	FALSE	FALSE
cg02640540	chr1	67053229	67053228	TRUE	TRUE	TRUE	TRUE	FALSE	FALSE
cg02697373	chr1	64357214	64357213	TRUE	TRUE	TRUE	TRUE	TRUE	FALSE
cg02773041	chr1	39738713	39738712	TRUE	TRUE	TRUE	TRUE	TRUE	FALSE
cg02862864	chr1	85276362	85276361	TRUE	FALSE	TRUE	TRUE	FALSE	FALSE
cg02954704	chr1	161379217	161379216	TRUE	FALSE	FALSE	TRUE	TRUE	FALSE
cg03146154	chr1	45751066	45751065	TRUE	TRUE	TRUE	TRUE	FALSE	FALSE
cg03217880	chr1	230332719	230332718	TRUE	TRUE	TRUE	TRUE	TRUE	FALSE
cg03277515	chr1	153348723	153348722	TRUE	FALSE	TRUE	TRUE	FALSE	FALSE
cg03340356	chr1	67135153	67135152	TRUE	TRUE	TRUE	TRUE	TRUE	FALSE
cg03375056	chr1	28735920	28735919	TRUE	FALSE	FALSE	TRUE	FALSE	FALSE
cg03396347	chr1	1944365	1944364	TRUE	TRUE	TRUE	TRUE	TRUE	FALSE
cg03513464	chr1	58433001	58433000	TRUE	TRUE	TRUE	TRUE	TRUE	FALSE
cg03513964	chr1	74674063	74674062	TRUE	TRUE	FALSE	TRUE	TRUE	FALSE
cg03648020	chr1	995948	995947	TRUE	TRUE	TRUE	TRUE	TRUE	FALSE
cg03732007	chr1	2139878	2139877	TRUE	TRUE	TRUE	TRUE	TRUE	FALSE
cg03802191	chr1	234479424	234479423	TRUE	TRUE	TRUE	TRUE	FALSE	FALSE
cg03812309	chr1	46472610	46472609	TRUE	TRUE	TRUE	TRUE	FALSE	FALSE
cg03981535	chr1	201982107	201982106	TRUE	TRUE	TRUE	TRUE	TRUE	FALSE
cg04077668	chr1	153627589	153627588	TRUE	TRUE	TRUE	TRUE	TRUE	FALSE
cg04087271	chr1	20588842	20588841	TRUE	TRUE	TRUE	TRUE	TRUE	FALSE
cg04111102	chr1	65688112	65688111	TRUE	TRUE	FALSE	TRUE	FALSE	FALSE
cg04154653	chr1	1197869	1197868	TRUE	FALSE	TRUE	TRUE	FALSE	FALSE
cg04160030	chr1	23869170	23869169	TRUE	TRUE	TRUE	TRUE	TRUE	FALSE
cg04222084	chr1	221742309	221742308	TRUE	TRUE	TRUE	TRUE	FALSE	FALSE
cg04305539	chr1	247008427	247008426	TRUE	FALSE	FALSE	TRUE	TRUE	FALSE
cg04352962	chr1	209806412	209806411	TRUE	TRUE	TRUE	TRUE	FALSE	FALSE
cg04407776	chr1	83999327	83999326	TRUE	FALSE	TRUE	TRUE	FALSE	FALSE
cg04414720	chr1	150697721	150697720	TRUE	TRUE	TRUE	TRUE	TRUE	FALSE
cg04546999	chr1	152983954	152983953	TRUE	FALSE	FALSE	TRUE	FALSE	FALSE
cg04671462	chr1	156677811	156677810	TRUE	FALSE	FALSE	TRUE	FALSE	FALSE
cg04704294	chr1	65792140	65792139	TRUE	TRUE	TRUE	TRUE	FALSE	FALSE
cg04798314	chr1	246505300	246505299	TRUE	TRUE	TRUE	TRUE	TRUE	FALSE
cg04833017	chr1	201982272	201982271	TRUE	TRUE	TRUE	TRUE	FALSE	FALSE
cg04896168	chr1	86502861	86502860	TRUE	TRUE	FALSE	TRUE	FALSE	FALSE
cg04927341	chr1	86110815	86110814	TRUE	TRUE	TRUE	TRUE	FALSE	FALSE
cg04993605	chr1	28246542	28246541	TRUE	FALSE	TRUE	TRUE	TRUE	FALSE
cg05045517	chr1	28247226	28247225	TRUE	TRUE	FALSE	TRUE	FALSE	FALSE
cg05128437	chr1	245045810	245045809	TRUE	FALSE	FALSE	TRUE	FALSE	FALSE
cg05232215	chr1	52928154	52928153	TRUE	TRUE	FALSE	TRUE	FALSE	FALSE
cg05258079	chr1	75723508	75723507	TRUE	TRUE	TRUE	TRUE	FALSE	FALSE
cg05505459	chr1	976616	976615	TRUE	TRUE	TRUE	TRUE	TRUE	FALSE
cg05560725	chr1	23868500	23868499	TRUE	TRUE	FALSE	TRUE	FALSE	FALSE
cg05639522	chr1	247518280	247518279	TRUE	TRUE	TRUE	TRUE	TRUE	FALSE
cg05660106	chr1	15523923	15523922	TRUE	TRUE	TRUE	TRUE	FALSE	FALSE
cg05784532	chr1	230148452	230148451	TRUE	TRUE	TRUE	TRUE	TRUE	FALSE
cg06092502	chr1	42146017	42146016	TRUE	TRUE	TRUE	TRUE	FALSE	FALSE
cg06092702	chr1	163423120	163423119	TRUE	TRUE	TRUE	TRUE	FALSE	FALSE
cg06207961	chr1	108118609	108118608	TRUE	TRUE	TRUE	TRUE	TRUE	FALSE
cg06209491	chr1	39672731	39672730	TRUE	TRUE	TRUE	TRUE	FALSE	FALSE
cg06212760	chr1	46199266	46199265	TRUE	FALSE	TRUE	TRUE	TRUE	FALSE
cg06375148	chr1	209784999	209784998	TRUE	FALSE	TRUE	TRUE	FALSE	FALSE
cg06418219	chr1	154975830	154975829	TRUE	TRUE	FALSE	TRUE	FALSE	FALSE
cg06600287	chr1	52922048	52922047	TRUE	FALSE	TRUE	TRUE	FALSE	FALSE
cg06750292	chr1	201888169	201888168	TRUE	TRUE	TRUE	TRUE	FALSE	FALSE
cg06775570	chr1	201888494	201888493	TRUE	TRUE	TRUE	TRUE	TRUE	FALSE
cg06811094	chr1	200302985	200302984	TRUE	TRUE	FALSE	TRUE	TRUE	FALSE
cg06838175	chr1	15247141	15247140	TRUE	TRUE	TRUE	TRUE	FALSE	FALSE
cg06885757	chr1	41623911	41623910	TRUE	TRUE	TRUE	TRUE	FALSE	FALSE
cg06917450	chr1	37690981	37690980	TRUE	TRUE	TRUE	TRUE	FALSE	FALSE
cg07018435	chr1	246696706	246696705	TRUE	TRUE	TRUE	TRUE	TRUE	FALSE
cg07157834	chr1	205850482	205850481	TRUE	TRUE	TRUE	TRUE	TRUE	FALSE
cg07167872	chr1	205850336	205850335	TRUE	TRUE	TRUE	TRUE	TRUE	FALSE
cg07216884	chr1	219791114	219791113	TRUE	TRUE	TRUE	TRUE	FALSE	FALSE
cg07233700	chr1	27935196	27935195	TRUE	TRUE	TRUE	TRUE	TRUE	FALSE
cg07399417	chr1	74733085	74733084	TRUE	FALSE	TRUE	TRUE	FALSE	FALSE
cg07568418	chr1	23868485	23868484	TRUE	TRUE	FALSE	TRUE	FALSE	FALSE
cg07700843	chr1	2459879	2459878	TRUE	TRUE	TRUE	TRUE	TRUE	FALSE
cg08029281	chr1	67134746	67134745	TRUE	FALSE	TRUE	TRUE	TRUE	FALSE
cg08128007	chr1	904056	904055	TRUE	TRUE	FALSE	FALSE	TRUE	FALSE
cg08130307	chr1	150538150	150538149	TRUE	TRUE	TRUE	TRUE	FALSE	FALSE
cg08133631	chr1	26201419	26201418	TRUE	TRUE	TRUE	TRUE	TRUE	FALSE
cg08277548	chr1	17274386	17274385	TRUE	TRUE	TRUE	TRUE	TRUE	FALSE
cg08460875	chr1	41484692	41484691	TRUE	TRUE	TRUE	TRUE	FALSE	FALSE
cg08477332	chr1	153617768	153617767	TRUE	TRUE	TRUE	TRUE	TRUE	FALSE
cg08815479	chr1	15247101	15247100	TRUE	TRUE	TRUE	TRUE	FALSE	FALSE
cg08859206	chr1	52927103	52927102	TRUE	TRUE	TRUE	TRUE	TRUE	FALSE
cg08895932	chr1	152806105	152806104	TRUE	TRUE	TRUE	TRUE	FALSE	FALSE
cg08923594	chr1	7402117	7402116	TRUE	TRUE	TRUE	TRUE	TRUE	FALSE
cg08932474	chr1	192642163	192642162	TRUE	TRUE	TRUE	TRUE	FALSE	FALSE
cg08944170	chr1	247937313	247937312	TRUE	TRUE	TRUE	TRUE	TRUE	FALSE
cg09126203	chr1	12601444	12601443	TRUE	FALSE	FALSE	TRUE	TRUE	FALSE
cg09163369	chr1	209827722	209827721	TRUE	TRUE	TRUE	TRUE	TRUE	FALSE
cg09167911	chr1	52842194	52842193	TRUE	TRUE	TRUE	TRUE	FALSE	FALSE
cg09186051	chr1	231846161	231846160	TRUE	FALSE	TRUE	TRUE	TRUE	FALSE
cg09331144	chr1	1240997	1240996	TRUE	TRUE	TRUE	TRUE	FALSE	FALSE
cg09359103	chr1	154867434	154867433	TRUE	TRUE	TRUE	TRUE	FALSE	FALSE
cg09365446	chr1	150697947	150697946	TRUE	FALSE	TRUE	TRUE	FALSE	FALSE
cg09365529	chr1	74674606	74674605	TRUE	TRUE	FALSE	TRUE	FALSE	FALSE
cg09413723	chr1	246507558	246507557	TRUE	TRUE	TRUE	TRUE	TRUE	FALSE
cg09502502	chr1	109283682	109283681	TRUE	FALSE	TRUE	TRUE	TRUE	FALSE
cg09506600	chr1	247936927	247936926	TRUE	TRUE	TRUE	TRUE	TRUE	FALSE
cg09628195	chr1	119008681	119008680	TRUE	TRUE	TRUE	TRUE	TRUE	FALSE
cg09811183	chr1	115088895	115088894	TRUE	TRUE	FALSE	TRUE	FALSE	FALSE
cg09811860	chr1	211630374	211630373	TRUE	FALSE	TRUE	TRUE	FALSE	FALSE
cg09828310	chr1	2521406	2521405	TRUE	FALSE	TRUE	FALSE	FALSE	FALSE
cg09850925	chr1	204305163	204305162	TRUE	TRUE	TRUE	TRUE	TRUE	FALSE
cg09935045	chr1	56645527	56645526	TRUE	TRUE	TRUE	TRUE	FALSE	FALSE
cg09978023	chr1	192639459	192639458	TRUE	FALSE	FALSE	TRUE	TRUE	FALSE
cg10115203	chr1	7061186	7061185	TRUE	FALSE	TRUE	TRUE	FALSE	FALSE
cg10167378	chr1	228620965	228620964	TRUE	TRUE	TRUE	TRUE	TRUE	FALSE
cg10312679	chr1	16115885	16115884	TRUE	TRUE	FALSE	TRUE	TRUE	FALSE
cg10327440	chr1	226990185	226990184	TRUE	TRUE	TRUE	TRUE	FALSE	FALSE
cg10431340	chr1	161309319	161309318	TRUE	FALSE	TRUE	TRUE	FALSE	FALSE
cg10512769	chr1	211502015	211502014	TRUE	TRUE	TRUE	TRUE	FALSE	FALSE
cg10523679	chr1	75724086	75724085	TRUE	TRUE	TRUE	TRUE	FALSE	FALSE
cg10625090	chr1	3815080	3815079	TRUE	TRUE	TRUE	TRUE	FALSE	FALSE
cg10708189	chr1	58433122	58433121	TRUE	TRUE	TRUE	TRUE	TRUE	FALSE
cg10782019	chr1	28775642	28775641	TRUE	TRUE	TRUE	TRUE	TRUE	FALSE
cg10796931	chr1	162497574	162497573	TRUE	TRUE	TRUE	TRUE	TRUE	FALSE
cg10807101	chr1	109739653	109739652	TRUE	TRUE	TRUE	TRUE	TRUE	FALSE
cg10884068	chr1	51909931	51909930	TRUE	TRUE	TRUE	FALSE	FALSE	FALSE
cg10953003	chr1	23868980	23868979	TRUE	TRUE	TRUE	TRUE	TRUE	FALSE
cg10967587	chr1	162497391	162497390	TRUE	TRUE	TRUE	TRUE	FALSE	FALSE
cg11120551	chr1	147242347	147242346	TRUE	FALSE	TRUE	TRUE	TRUE	FALSE
cg11143399	chr1	157163654	157163653	TRUE	FALSE	TRUE	TRUE	FALSE	FALSE
cg11161846	chr1	161020663	161020662	TRUE	TRUE	TRUE	TRUE	TRUE	FALSE
cg11166453	chr1	247518480	247518479	TRUE	TRUE	TRUE	TRUE	TRUE	FALSE
cg11176853	chr1	230332949	230332948	TRUE	TRUE	TRUE	TRUE	TRUE	FALSE
cg11262906	chr1	84997210	84997209	TRUE	TRUE	TRUE	TRUE	TRUE	FALSE
cg11309454	chr1	88993847	88993846	TRUE	TRUE	TRUE	TRUE	FALSE	FALSE
cg11343894	chr1	153627229	153627228	TRUE	TRUE	TRUE	TRUE	FALSE	FALSE
cg11347139	chr1	100037020	100037019	TRUE	TRUE	TRUE	TRUE	FALSE	FALSE
cg11347165	chr1	17305150	17305149	TRUE	FALSE	TRUE	TRUE	TRUE	FALSE
cg11348583	chr1	196777746	196777745	TRUE	TRUE	TRUE	TRUE	FALSE	FALSE
cg11406134	chr1	18876458	18876457	TRUE	TRUE	TRUE	TRUE	TRUE	FALSE
cg11578532	chr1	161038338	161038337	TRUE	TRUE	TRUE	TRUE	FALSE	FALSE
cg11586189	chr1	201888464	201888463	TRUE	TRUE	TRUE	TRUE	TRUE	FALSE
cg11799650	chr1	15247126	15247125	TRUE	TRUE	TRUE	TRUE	TRUE	FALSE
cg11824956	chr1	181317708	181317707	TRUE	TRUE	TRUE	TRUE	TRUE	FALSE
cg11825002	chr1	230333028	230333027	TRUE	TRUE	TRUE	TRUE	TRUE	FALSE
cg11963755	chr1	214303863	214303862	TRUE	FALSE	TRUE	TRUE	TRUE	FALSE
cg11965913	chr1	205850279	205850278	TRUE	TRUE	TRUE	TRUE	TRUE	FALSE
cg12084952	chr1	23868490	23868489	TRUE	TRUE	FALSE	TRUE	TRUE	FALSE
cg12339802	chr1	37690874	37690873	TRUE	TRUE	TRUE	TRUE	TRUE	FALSE
cg12426196	chr1	161039037	161039036	TRUE	FALSE	TRUE	TRUE	FALSE	FALSE
cg12552165	chr1	183185847	183185846	TRUE	FALSE	TRUE	TRUE	FALSE	FALSE
cg12639453	chr1	2104342	2104341	TRUE	TRUE	TRUE	TRUE	TRUE	FALSE
cg12648811	chr1	16727392	16727391	TRUE	TRUE	FALSE	FALSE	FALSE	FALSE
cg12664795	chr1	156301128	156301127	TRUE	FALSE	TRUE	TRUE	TRUE	FALSE
cg12700145	chr1	30685354	30685353	TRUE	FALSE	TRUE	TRUE	FALSE	FALSE
cg12725760	chr1	192904783	192904782	TRUE	TRUE	TRUE	TRUE	FALSE	FALSE
cg12731430	chr1	33080817	33080816	TRUE	TRUE	FALSE	TRUE	FALSE	FALSE
cg12908607	chr1	43936851	43936850	TRUE	TRUE	TRUE	TRUE	TRUE	FALSE
cg12940439	chr1	67135025	67135024	TRUE	TRUE	TRUE	TRUE	TRUE	FALSE
cg13052034	chr1	66533556	66533555	TRUE	TRUE	TRUE	TRUE	FALSE	FALSE
cg13097088	chr1	7060841	7060840	TRUE	FALSE	TRUE	TRUE	FALSE	FALSE
cg13111532	chr1	1955105	1955104	TRUE	TRUE	TRUE	TRUE	TRUE	FALSE
cg13175981	chr1	150579907	150579906	TRUE	TRUE	TRUE	TRUE	FALSE	FALSE
cg13296163	chr1	245153480	245153479	TRUE	TRUE	TRUE	TRUE	TRUE	FALSE
cg13379971	chr1	43172805	43172804	TRUE	TRUE	TRUE	TRUE	FALSE	FALSE
cg13453750	chr1	205814262	205814261	TRUE	FALSE	TRUE	TRUE	TRUE	FALSE
cg13456504	chr1	90726027	90726026	TRUE	TRUE	TRUE	TRUE	TRUE	FALSE
cg13462158	chr1	55056432	55056431	TRUE	TRUE	TRUE	TRUE	TRUE	FALSE
cg13466383	chr1	161038916	161038915	TRUE	FALSE	TRUE	TRUE	FALSE	FALSE
cg13502125	chr1	148354064	148354063	TRUE	FALSE	FALSE	TRUE	TRUE	FALSE
cg13556452	chr1	2459803	2459802	TRUE	TRUE	TRUE	TRUE	TRUE	FALSE
cg13677741	chr1	235867797	235867796	TRUE	TRUE	TRUE	TRUE	FALSE	FALSE
cg13786083	chr1	18784241	18784240	TRUE	TRUE	TRUE	TRUE	FALSE	FALSE
cg13906823	chr1	161039035	161039034	TRUE	FALSE	TRUE	TRUE	FALSE	FALSE
cg13946767	chr1	153627196	153627195	TRUE	TRUE	TRUE	FALSE	TRUE	FALSE
cg14032261	chr1	211735964	211735963	TRUE	FALSE	FALSE	TRUE	FALSE	FALSE
cg14087168	chr1	156480878	156480877	TRUE	FALSE	FALSE	TRUE	FALSE	FALSE
cg14159672	chr1	205850052	205850051	TRUE	TRUE	TRUE	TRUE	TRUE	FALSE
cg14378564	chr1	28091240	28091239	TRUE	TRUE	FALSE	TRUE	FALSE	FALSE
cg14609025	chr1	119008361	119008360	TRUE	TRUE	TRUE	FALSE	FALSE	FALSE
cg14659814	chr1	3293347	3293346	TRUE	TRUE	FALSE	TRUE	FALSE	FALSE
cg14669130	chr1	88993822	88993821	TRUE	TRUE	TRUE	TRUE	FALSE	FALSE
cg14783068	chr1	178642609	178642608	TRUE	FALSE	TRUE	TRUE	TRUE	FALSE
cg14847009	chr1	175193380	175193379	TRUE	TRUE	TRUE	TRUE	FALSE	FALSE
cg14893161	chr1	205850124	205850123	TRUE	TRUE	TRUE	TRUE	TRUE	FALSE
cg14976592	chr1	65420478	65420477	TRUE	TRUE	TRUE	TRUE	TRUE	FALSE
cg14981532	chr1	16888983	16888982	TRUE	TRUE	TRUE	TRUE	FALSE	FALSE
cg14988680	chr1	212515076	212515075	TRUE	TRUE	TRUE	TRUE	TRUE	FALSE
cg15073112	chr1	86524115	86524114	TRUE	FALSE	FALSE	TRUE	FALSE	FALSE
cg15358701	chr1	161440670	161440669	TRUE	TRUE	TRUE	TRUE	FALSE	FALSE
cg15580309	chr1	46348435	46348434	TRUE	TRUE	TRUE	TRUE	FALSE	FALSE
cg15685922	chr1	156075418	156075417	TRUE	TRUE	FALSE	FALSE	TRUE	FALSE
cg15827003	chr1	1891474	1891473	TRUE	TRUE	TRUE	TRUE	TRUE	FALSE
cg15962314	chr1	43934198	43934197	TRUE	TRUE	TRUE	TRUE	TRUE	FALSE
cg15997130	chr1	23838714	23838713	TRUE	TRUE	TRUE	TRUE	FALSE	FALSE
cg16109817	chr1	15835715	15835714	TRUE	TRUE	TRUE	TRUE	TRUE	FALSE
cg16298867	chr1	2917079	2917078	TRUE	TRUE	TRUE	TRUE	FALSE	FALSE
cg16325326	chr1	52726390	52726389	TRUE	TRUE	TRUE	TRUE	TRUE	FALSE
cg16341373	chr1	37692291	37692290	TRUE	TRUE	FALSE	TRUE	TRUE	FALSE
cg16348003	chr1	153617306	153617305	TRUE	TRUE	TRUE	TRUE	TRUE	FALSE
cg16387850	chr1	46517218	46517217	TRUE	TRUE	TRUE	TRUE	TRUE	FALSE
cg16556008	chr1	100895108	100895107	TRUE	TRUE	TRUE	TRUE	FALSE	FALSE
cg16665231	chr1	245577898	245577897	TRUE	TRUE	TRUE	TRUE	TRUE	FALSE
cg16680214	chr1	154867508	154867507	TRUE	TRUE	TRUE	TRUE	FALSE	FALSE
cg16731318	chr1	93847788	93847787	TRUE	TRUE	TRUE	TRUE	FALSE	FALSE
cg16906964	chr1	4600112	4600111	TRUE	TRUE	TRUE	TRUE	TRUE	FALSE
cg16925659	chr1	30719305	30719304	TRUE	TRUE	TRUE	TRUE	FALSE	FALSE
cg17016894	chr1	41423795	41423794	TRUE	TRUE	TRUE	TRUE	FALSE	FALSE
cg17029193	chr1	8450548	8450547	TRUE	TRUE	FALSE	TRUE	FALSE	FALSE
cg17178900	chr1	205849829	205849828	TRUE	TRUE	TRUE	TRUE	TRUE	FALSE
cg17246694	chr1	24154358	24154357	TRUE	TRUE	TRUE	TRUE	FALSE	FALSE
cg17425144	chr1	10507507	10507506	TRUE	TRUE	TRUE	TRUE	TRUE	FALSE
cg17476910	chr1	148334049	148334048	TRUE	TRUE	TRUE	TRUE	TRUE	FALSE
cg17590083	chr1	40899059	40899058	TRUE	TRUE	TRUE	TRUE	FALSE	FALSE
cg17719053	chr1	74732528	74732527	TRUE	FALSE	TRUE	TRUE	TRUE	FALSE
cg17737388	chr1	85258772	85258771	TRUE	TRUE	TRUE	TRUE	TRUE	FALSE
cg17747265	chr1	1944342	1944341	TRUE	TRUE	TRUE	TRUE	TRUE	FALSE
cg17833169	chr1	67134865	67134864	TRUE	TRUE	TRUE	TRUE	TRUE	FALSE
cg17839226	chr1	225478062	225478061	TRUE	TRUE	FALSE	TRUE	FALSE	FALSE
cg17859187	chr1	168178692	168178691	TRUE	TRUE	TRUE	TRUE	FALSE	FALSE
cg17933807	chr1	37596075	37596074	TRUE	TRUE	TRUE	TRUE	TRUE	FALSE
cg18144885	chr1	245968760	245968759	TRUE	TRUE	TRUE	TRUE	TRUE	FALSE
cg18198730	chr1	247518283	247518282	TRUE	TRUE	TRUE	TRUE	FALSE	FALSE
cg18394614	chr1	43592587	43592586	TRUE	TRUE	TRUE	TRUE	FALSE	FALSE
cg18515587	chr1	151372331	151372330	TRUE	FALSE	TRUE	TRUE	FALSE	FALSE
cg18795169	chr1	18575672	18575671	TRUE	TRUE	TRUE	TRUE	TRUE	FALSE
cg18801370	chr1	151458017	151458016	TRUE	FALSE	TRUE	TRUE	FALSE	FALSE
cg18852414	chr1	214303938	214303937	TRUE	TRUE	TRUE	TRUE	TRUE	FALSE
cg19367136	chr1	23868570	23868569	TRUE	TRUE	TRUE	TRUE	FALSE	FALSE
cg19367176	chr1	248628416	248628415	TRUE	TRUE	TRUE	TRUE	FALSE	FALSE
cg19452316	chr1	206507634	206507633	TRUE	FALSE	TRUE	TRUE	TRUE	FALSE
cg19552482	chr1	42846816	42846815	TRUE	TRUE	TRUE	TRUE	TRUE	FALSE
cg19594218	chr1	62194885	62194884	TRUE	TRUE	FALSE	TRUE	FALSE	FALSE
cg19637330	chr1	18784429	18784428	TRUE	TRUE	TRUE	TRUE	FALSE	FALSE
cg19743168	chr1	23218503	23218502	TRUE	TRUE	TRUE	TRUE	TRUE	FALSE
cg20245116	chr1	55056341	55056340	TRUE	TRUE	TRUE	TRUE	TRUE	FALSE
cg20281040	chr1	16206569	16206568	TRUE	TRUE	TRUE	TRUE	FALSE	FALSE
cg20362147	chr1	201983451	201983450	TRUE	TRUE	TRUE	TRUE	FALSE	FALSE
cg20383390	chr1	117366401	117366400	TRUE	TRUE	TRUE	TRUE	FALSE	FALSE
cg20415053	chr1	26201438	26201437	TRUE	TRUE	TRUE	TRUE	TRUE	FALSE
cg20430773	chr1	16207663	16207662	TRUE	TRUE	TRUE	TRUE	FALSE	FALSE
cg20434152	chr1	7060867	7060866	TRUE	FALSE	TRUE	TRUE	TRUE	FALSE
cg20485607	chr1	119675074	119675073	TRUE	TRUE	TRUE	TRUE	TRUE	FALSE
cg20703997	chr1	4027617	4027616	TRUE	TRUE	TRUE	TRUE	TRUE	FALSE
cg20800956	chr1	171842338	171842337	TRUE	TRUE	TRUE	TRUE	FALSE	FALSE
cg20948151	chr1	36398338	36398337	TRUE	TRUE	TRUE	TRUE	FALSE	FALSE
cg20978923	chr1	12124518	12124517	TRUE	TRUE	TRUE	TRUE	FALSE	FALSE
cg20995928	chr1	119687241	119687240	TRUE	FALSE	TRUE	TRUE	TRUE	FALSE
cg21012057	chr1	15212416	15212415	TRUE	FALSE	TRUE	TRUE	TRUE	FALSE
cg21194808	chr1	2274060	2274059	TRUE	TRUE	TRUE	TRUE	FALSE	FALSE
cg21263208	chr1	247122634	247122633	TRUE	FALSE	FALSE	TRUE	FALSE	FALSE
cg21399703	chr1	247518138	247518137	TRUE	TRUE	TRUE	TRUE	TRUE	FALSE
cg21402748	chr1	2922285	2922284	TRUE	TRUE	TRUE	TRUE	FALSE	FALSE
cg21917976	chr1	147242310	147242309	TRUE	TRUE	TRUE	TRUE	TRUE	FALSE
cg21951975	chr1	209806389	209806388	TRUE	TRUE	TRUE	TRUE	TRUE	FALSE
cg22016671	chr1	4161342	4161341	TRUE	TRUE	TRUE	TRUE	TRUE	FALSE
cg22029157	chr1	209806321	209806320	TRUE	TRUE	TRUE	TRUE	FALSE	FALSE
cg22040403	chr1	23531525	23531524	TRUE	TRUE	TRUE	TRUE	FALSE	FALSE
cg22077361	chr1	23868858	23868857	TRUE	TRUE	TRUE	TRUE	TRUE	FALSE
cg22153463	chr1	84997203	84997202	TRUE	TRUE	TRUE	TRUE	FALSE	FALSE
cg22173637	chr1	214453602	214453601	TRUE	TRUE	TRUE	TRUE	FALSE	FALSE
cg22338127	chr1	209806228	209806227	TRUE	TRUE	TRUE	TRUE	FALSE	FALSE
cg22374474	chr1	247517996	247517995	TRUE	TRUE	TRUE	TRUE	TRUE	FALSE
cg22381395	chr1	117671953	117671952	TRUE	TRUE	TRUE	TRUE	TRUE	FALSE
cg22386492	chr1	14732146	14732145	TRUE	TRUE	FALSE	TRUE	TRUE	FALSE
cg22424108	chr1	94819976	94819975	TRUE	FALSE	FALSE	TRUE	TRUE	FALSE
cg22449745	chr1	37691268	37691267	TRUE	TRUE	FALSE	TRUE	FALSE	FALSE
cg22502715	chr1	247008271	247008270	TRUE	TRUE	TRUE	TRUE	FALSE	FALSE
cg22607266	chr1	199748163	199748162	TRUE	FALSE	TRUE	TRUE	FALSE	FALSE
cg22614927	chr1	23869098	23869097	TRUE	TRUE	TRUE	TRUE	TRUE	FALSE
cg22732644	chr1	154772649	154772648	TRUE	FALSE	TRUE	TRUE	TRUE	FALSE
cg22816091	chr1	42146000	42145999	TRUE	TRUE	FALSE	TRUE	TRUE	FALSE
cg22875332	chr1	75724023	75724022	TRUE	TRUE	TRUE	TRUE	FALSE	FALSE
cg23015920	chr1	4770385	4770384	TRUE	FALSE	TRUE	TRUE	FALSE	FALSE
cg23034840	chr1	205813395	205813394	TRUE	TRUE	TRUE	TRUE	FALSE	FALSE
cg23107878	chr1	152188922	152188921	TRUE	TRUE	FALSE	TRUE	FALSE	FALSE
cg23166289	chr1	209827738	209827737	TRUE	TRUE	TRUE	TRUE	FALSE	FALSE
cg23173402	chr1	227447858	227447857	TRUE	TRUE	TRUE	TRUE	TRUE	FALSE
cg23273869	chr1	24970404	24970403	TRUE	TRUE	TRUE	TRUE	FALSE	FALSE
cg23283495	chr1	209806435	209806434	TRUE	TRUE	TRUE	TRUE	TRUE	FALSE
cg23635910	chr1	976676	976675	TRUE	TRUE	TRUE	TRUE	FALSE	FALSE
cg23691223	chr1	57319365	57319364	TRUE	TRUE	TRUE	TRUE	TRUE	FALSE
cg23733394	chr1	904373	904372	TRUE	TRUE	TRUE	FALSE	TRUE	FALSE
cg23874078	chr1	111139527	111139526	TRUE	TRUE	TRUE	TRUE	FALSE	FALSE
cg23914842	chr1	9267112	9267111	TRUE	TRUE	TRUE	TRUE	FALSE	FALSE
cg23971170	chr1	165357033	165357032	TRUE	TRUE	TRUE	TRUE	FALSE	FALSE
cg23973274	chr1	155087697	155087696	TRUE	FALSE	TRUE	TRUE	FALSE	FALSE
cg23982607	chr1	1891941	1891940	TRUE	TRUE	TRUE	TRUE	FALSE	FALSE
cg24088508	chr1	37690791	37690790	TRUE	TRUE	TRUE	TRUE	TRUE	FALSE
cg24161057	chr1	161039022	161039021	TRUE	TRUE	TRUE	TRUE	FALSE	FALSE
cg24348107	chr1	51616904	51616903	TRUE	TRUE	TRUE	TRUE	TRUE	FALSE
cg24411043	chr1	161038508	161038507	TRUE	TRUE	TRUE	TRUE	FALSE	FALSE
cg24450063	chr1	156194109	156194108	TRUE	FALSE	FALSE	TRUE	FALSE	FALSE
cg24453699	chr1	90725335	90725334	TRUE	FALSE	FALSE	TRUE	FALSE	FALSE
cg24478129	chr1	246428822	246428821	TRUE	TRUE	TRUE	TRUE	TRUE	FALSE
cg24502330	chr1	20587536	20587535	TRUE	TRUE	TRUE	TRUE	FALSE	FALSE
cg24503407	chr1	205850365	205850364	TRUE	TRUE	TRUE	TRUE	TRUE	FALSE
cg24545100	chr1	151806182	151806181	TRUE	FALSE	TRUE	TRUE	TRUE	FALSE
cg24578937	chr1	2159376	2159375	TRUE	FALSE	TRUE	TRUE	FALSE	FALSE
cg24675658	chr1	52726425	52726424	TRUE	TRUE	TRUE	TRUE	FALSE	FALSE
cg24693225	chr1	63073943	63073942	TRUE	FALSE	TRUE	TRUE	FALSE	FALSE
cg24693760	chr1	167540682	167540681	TRUE	TRUE	TRUE	TRUE	TRUE	FALSE
cg24699146	chr1	23826090	23826089	TRUE	TRUE	TRUE	TRUE	FALSE	FALSE
cg24792360	chr1	23868654	23868653	TRUE	FALSE	FALSE	TRUE	TRUE	FALSE
cg24846680	chr1	228174609	228174608	TRUE	TRUE	TRUE	TRUE	TRUE	FALSE
cg24920358	chr1	39738614	39738613	TRUE	TRUE	TRUE	TRUE	TRUE	FALSE
cg24998527	chr1	42145937	42145936	TRUE	TRUE	TRUE	TRUE	TRUE	FALSE
cg25066665	chr1	150363032	150363031	TRUE	TRUE	TRUE	TRUE	TRUE	FALSE
cg25107893	chr1	976222	976221	TRUE	TRUE	TRUE	TRUE	FALSE	FALSE
cg25139084	chr1	37041693	37041692	TRUE	TRUE	TRUE	TRUE	TRUE	FALSE
cg25204440	chr1	209806254	209806253	TRUE	TRUE	TRUE	TRUE	TRUE	FALSE
cg25208724	chr1	156194054	156194053	TRUE	FALSE	FALSE	TRUE	FALSE	FALSE
cg25303761	chr1	30783182	30783181	TRUE	TRUE	TRUE	TRUE	TRUE	FALSE
cg25346122	chr1	198156311	198156310	TRUE	FALSE	FALSE	TRUE	TRUE	FALSE
cg25597117	chr1	161379327	161379326	TRUE	FALSE	TRUE	TRUE	TRUE	FALSE
cg25755851	chr1	9275736	9275735	TRUE	TRUE	TRUE	TRUE	TRUE	FALSE
cg25762395	chr1	3900279	3900278	TRUE	FALSE	TRUE	TRUE	FALSE	FALSE
cg25763306	chr1	7681157	7681156	TRUE	TRUE	TRUE	TRUE	TRUE	FALSE
cg25767906	chr1	52927110	52927109	TRUE	TRUE	FALSE	TRUE	TRUE	FALSE
cg25838465	chr1	91547180	91547179	TRUE	TRUE	TRUE	TRUE	TRUE	FALSE
cg25856811	chr1	153001482	153001481	TRUE	FALSE	TRUE	TRUE	TRUE	FALSE
cg25880954	chr1	47434959	47434958	TRUE	TRUE	TRUE	TRUE	FALSE	FALSE
cg26060667	chr1	247517941	247517940	TRUE	TRUE	TRUE	TRUE	TRUE	FALSE
cg26135716	chr1	182391768	182391767	TRUE	TRUE	TRUE	TRUE	FALSE	FALSE
cg26220594	chr1	18784485	18784484	TRUE	TRUE	TRUE	TRUE	FALSE	FALSE
cg26353448	chr1	248360935	248360934	TRUE	TRUE	TRUE	TRUE	TRUE	FALSE
cg26573321	chr1	9651606	9651605	TRUE	FALSE	TRUE	TRUE	TRUE	FALSE
cg26816564	chr1	7770993	7770992	TRUE	TRUE	TRUE	TRUE	TRUE	FALSE
cg26932889	chr1	53669798	53669797	TRUE	FALSE	FALSE	TRUE	TRUE	FALSE
cg27170260	chr1	37690904	37690903	TRUE	TRUE	TRUE	TRUE	TRUE	FALSE
cg27180868	chr1	161038961	161038960	TRUE	FALSE	TRUE	TRUE	FALSE	FALSE
cg27473416	chr1	180953781	180953780	TRUE	TRUE	FALSE	TRUE	FALSE	FALSE
cg27530704	chr1	26952080	26952079	TRUE	TRUE	TRUE	TRUE	TRUE	FALSE
cg27535305	chr1	52926979	52926978	TRUE	TRUE	TRUE	TRUE	TRUE	FALSE
cg27546670	chr1	147774728	147774727	TRUE	FALSE	TRUE	TRUE	TRUE	FALSE
cg00036347	chr1	151839448	151839447	FALSE	TRUE	TRUE	TRUE	FALSE	FALSE
cg00157179	chr1	2452249	2452248	FALSE	TRUE	FALSE	TRUE	TRUE	FALSE
cg00173787	chr1	156729070	156729069	FALSE	TRUE	FALSE	TRUE	FALSE	FALSE
cg00211609	chr1	1242660	1242659	FALSE	TRUE	FALSE	TRUE	FALSE	FALSE
cg00272446	chr1	157195194	157195193	FALSE	TRUE	TRUE	TRUE	TRUE	FALSE
cg00297950	chr1	109739904	109739903	FALSE	TRUE	TRUE	TRUE	TRUE	FALSE
cg00447632	chr1	1000482	1000481	FALSE	TRUE	FALSE	TRUE	FALSE	FALSE
cg00569276	chr1	17120051	17120050	FALSE	TRUE	FALSE	TRUE	FALSE	FALSE
cg00575674	chr1	60848626	60848625	FALSE	TRUE	FALSE	TRUE	FALSE	FALSE
cg00576075	chr1	85259972	85259971	FALSE	TRUE	FALSE	TRUE	FALSE	FALSE
cg00600454	chr1	65002335	65002334	FALSE	TRUE	TRUE	TRUE	TRUE	FALSE
cg00695362	chr1	40040541	40040540	FALSE	TRUE	TRUE	TRUE	FALSE	FALSE
cg00759254	chr1	27353471	27353470	FALSE	TRUE	FALSE	TRUE	FALSE	FALSE
cg00784581	chr1	20589100	20589099	FALSE	TRUE	FALSE	TRUE	TRUE	FALSE
cg00785941	chr1	247937290	247937289	FALSE	TRUE	TRUE	TRUE	TRUE	FALSE
cg00797651	chr1	207320992	207320991	FALSE	TRUE	FALSE	TRUE	FALSE	FALSE
cg00804995	chr1	216836721	216836720	FALSE	TRUE	FALSE	FALSE	FALSE	FALSE
cg00821186	chr1	248627681	248627680	FALSE	TRUE	TRUE	TRUE	FALSE	FALSE
cg00852783	chr1	26307142	26307141	FALSE	TRUE	TRUE	TRUE	FALSE	FALSE
cg00855731	chr1	205592779	205592778	FALSE	TRUE	FALSE	TRUE	FALSE	FALSE
cg00857998	chr1	205210852	205210851	FALSE	TRUE	FALSE	TRUE	FALSE	FALSE
cg00888758	chr1	152224199	152224198	FALSE	TRUE	TRUE	TRUE	TRUE	FALSE
cg00917251	chr1	24503498	24503497	FALSE	TRUE	TRUE	TRUE	FALSE	FALSE
cg00930781	chr1	4600506	4600505	FALSE	TRUE	TRUE	TRUE	TRUE	FALSE
cg00934037	chr1	100424117	100424116	FALSE	TRUE	FALSE	FALSE	FALSE	FALSE
cg00969087	chr1	116167711	116167710	FALSE	TRUE	FALSE	TRUE	TRUE	FALSE
cg00990022	chr1	39672381	39672380	FALSE	TRUE	FALSE	TRUE	FALSE	FALSE
cg01017147	chr1	171840966	171840965	FALSE	TRUE	FALSE	TRUE	TRUE	FALSE
cg01023271	chr1	160098818	160098817	FALSE	TRUE	TRUE	TRUE	FALSE	FALSE
cg01037895	chr1	21551289	21551288	FALSE	TRUE	FALSE	TRUE	TRUE	FALSE
cg01059126	chr1	212285688	212285687	FALSE	TRUE	FALSE	FALSE	FALSE	FALSE
cg01062247	chr1	151853499	151853498	FALSE	TRUE	FALSE	TRUE	FALSE	FALSE
cg01072550	chr1	21179477	21179476	FALSE	TRUE	TRUE	TRUE	FALSE	FALSE
cg01205584	chr1	226083024	226083023	FALSE	TRUE	TRUE	TRUE	TRUE	FALSE
cg01394944	chr1	104072988	104072987	FALSE	TRUE	TRUE	TRUE	FALSE	FALSE
cg01413809	chr1	84996801	84996800	FALSE	TRUE	TRUE	TRUE	FALSE	FALSE
cg01417625	chr1	183218299	183218298	FALSE	TRUE	TRUE	TRUE	TRUE	FALSE
cg01428437	chr1	1920726	1920725	FALSE	TRUE	FALSE	TRUE	FALSE	FALSE
cg01511231	chr1	1174297	1174296	FALSE	TRUE	FALSE	TRUE	TRUE	FALSE
cg01522456	chr1	115089616	115089615	FALSE	TRUE	TRUE	TRUE	FALSE	FALSE
cg01534871	chr1	19600357	19600356	FALSE	TRUE	FALSE	TRUE	TRUE	FALSE
cg01676680	chr1	33179171	33179170	FALSE	TRUE	FALSE	TRUE	FALSE	FALSE
cg01705587	chr1	149917813	149917812	FALSE	TRUE	FALSE	FALSE	FALSE	FALSE
cg01783960	chr1	16972046	16972045	FALSE	TRUE	FALSE	TRUE	FALSE	FALSE
cg01802117	chr1	52927889	52927888	FALSE	TRUE	FALSE	FALSE	FALSE	FALSE
cg01816014	chr1	13700884	13700883	FALSE	TRUE	FALSE	TRUE	TRUE	FALSE
cg01959838	chr1	107750292	107750291	FALSE	TRUE	TRUE	FALSE	TRUE	FALSE
cg01960686	chr1	230286262	230286261	FALSE	TRUE	TRUE	TRUE	FALSE	FALSE
cg01987224	chr1	201115339	201115338	FALSE	TRUE	FALSE	TRUE	FALSE	FALSE
cg02008416	chr1	54980208	54980207	FALSE	TRUE	FALSE	TRUE	TRUE	FALSE
cg02031397	chr1	41917928	41917927	FALSE	TRUE	FALSE	TRUE	FALSE	FALSE
cg02097014	chr1	203187247	203187246	FALSE	TRUE	FALSE	TRUE	TRUE	FALSE
cg02152968	chr1	207320869	207320868	FALSE	TRUE	FALSE	TRUE	FALSE	FALSE
cg02251754	chr1	28245789	28245788	FALSE	TRUE	TRUE	FALSE	TRUE	FALSE
cg02290550	chr1	41021646	41021645	FALSE	TRUE	TRUE	TRUE	FALSE	FALSE
cg02350320	chr1	33080551	33080550	FALSE	TRUE	TRUE	TRUE	TRUE	FALSE
cg02362103	chr1	118990151	118990150	FALSE	TRUE	FALSE	TRUE	FALSE	FALSE
cg02421543	chr1	93345270	93345269	FALSE	TRUE	FALSE	TRUE	TRUE	FALSE
cg02450742	chr1	26530158	26530157	FALSE	TRUE	FALSE	TRUE	FALSE	FALSE
cg02453146	chr1	52602916	52602915	FALSE	TRUE	FALSE	FALSE	FALSE	FALSE
cg02483449	chr1	83861174	83861173	FALSE	TRUE	FALSE	TRUE	FALSE	FALSE
cg02635260	chr1	222814776	222814775	FALSE	TRUE	FALSE	FALSE	TRUE	FALSE
cg02754945	chr1	152189410	152189409	FALSE	TRUE	TRUE	TRUE	FALSE	FALSE
cg02772605	chr1	28585812	28585811	FALSE	TRUE	TRUE	FALSE	FALSE	FALSE
cg02835848	chr1	14923886	14923885	FALSE	TRUE	FALSE	FALSE	FALSE	FALSE
cg02850689	chr1	2459909	2459908	FALSE	TRUE	TRUE	TRUE	TRUE	FALSE
cg02851558	chr1	37795317	37795316	FALSE	TRUE	FALSE	TRUE	FALSE	FALSE
cg02951974	chr1	246696655	246696654	FALSE	TRUE	TRUE	TRUE	TRUE	FALSE
cg02987928	chr1	16226962	16226961	FALSE	TRUE	TRUE	TRUE	TRUE	FALSE
cg03085170	chr1	37318321	37318320	FALSE	TRUE	FALSE	TRUE	FALSE	FALSE
cg03110901	chr1	67831904	67831903	FALSE	TRUE	FALSE	FALSE	FALSE	FALSE
cg03120789	chr1	19882316	19882315	FALSE	TRUE	FALSE	TRUE	FALSE	FALSE
cg03123370	chr1	45499672	45499671	FALSE	TRUE	TRUE	TRUE	TRUE	FALSE
cg03128534	chr1	42958306	42958305	FALSE	TRUE	TRUE	TRUE	FALSE	FALSE
cg03185752	chr1	1019252	1019251	FALSE	TRUE	TRUE	FALSE	TRUE	FALSE
cg03242265	chr1	148310365	148310364	FALSE	TRUE	FALSE	TRUE	TRUE	FALSE
cg03352427	chr1	154155048	154155047	FALSE	TRUE	FALSE	TRUE	FALSE	FALSE
cg03387723	chr1	41242793	41242792	FALSE	TRUE	TRUE	TRUE	FALSE	FALSE
cg03433241	chr1	166884042	166884041	FALSE	TRUE	FALSE	TRUE	FALSE	FALSE
cg03435244	chr1	245256666	245256665	FALSE	TRUE	FALSE	TRUE	TRUE	FALSE
cg03514351	chr1	65526083	65526082	FALSE	TRUE	FALSE	TRUE	FALSE	FALSE
cg03522107	chr1	16226835	16226834	FALSE	TRUE	TRUE	TRUE	TRUE	FALSE
cg03579872	chr1	52927802	52927801	FALSE	TRUE	FALSE	FALSE	FALSE	FALSE
cg03693486	chr1	20587830	20587829	FALSE	TRUE	FALSE	TRUE	FALSE	FALSE
cg03748243	chr1	172444403	172444402	FALSE	TRUE	FALSE	TRUE	TRUE	FALSE
cg03748376	chr1	247937284	247937283	FALSE	TRUE	TRUE	TRUE	TRUE	FALSE
cg03765258	chr1	7150889	7150888	FALSE	TRUE	FALSE	TRUE	TRUE	FALSE
cg03844060	chr1	26164138	26164137	FALSE	TRUE	TRUE	TRUE	FALSE	FALSE
cg03847348	chr1	2482267	2482266	FALSE	TRUE	FALSE	TRUE	FALSE	FALSE
cg03884592	chr1	41918804	41918803	FALSE	TRUE	FALSE	TRUE	FALSE	FALSE
cg03920003	chr1	154609532	154609531	FALSE	TRUE	FALSE	TRUE	FALSE	FALSE
cg04036898	chr1	46198927	46198926	FALSE	TRUE	TRUE	TRUE	TRUE	FALSE
cg04127455	chr1	156602940	156602939	FALSE	TRUE	FALSE	TRUE	TRUE	FALSE
cg04134399	chr1	246067841	246067840	FALSE	TRUE	FALSE	TRUE	TRUE	FALSE
cg04193160	chr1	228212719	228212718	FALSE	TRUE	TRUE	TRUE	TRUE	FALSE
cg04205715	chr1	34794337	34794336	FALSE	TRUE	FALSE	TRUE	FALSE	FALSE
cg04218880	chr1	39922593	39922592	FALSE	TRUE	FALSE	TRUE	TRUE	FALSE
cg04277893	chr1	207955640	207955639	FALSE	TRUE	FALSE	FALSE	FALSE	FALSE
cg04289045	chr1	3858542	3858541	FALSE	TRUE	TRUE	TRUE	FALSE	FALSE
cg04306992	chr1	4652296	4652295	FALSE	TRUE	TRUE	TRUE	FALSE	FALSE
cg04342483	chr1	7199231	7199230	FALSE	TRUE	TRUE	TRUE	FALSE	FALSE
cg04370730	chr1	34782366	34782365	FALSE	TRUE	FALSE	FALSE	FALSE	FALSE
cg04508951	chr1	193487011	193487010	FALSE	TRUE	TRUE	TRUE	FALSE	FALSE
cg04558298	chr1	16951855	16951854	FALSE	TRUE	FALSE	TRUE	FALSE	FALSE
cg04673462	chr1	37996225	37996224	FALSE	TRUE	TRUE	TRUE	FALSE	FALSE
cg04720592	chr1	117623103	117623102	FALSE	TRUE	TRUE	TRUE	FALSE	FALSE
cg04818845	chr1	6520108	6520107	FALSE	TRUE	TRUE	TRUE	FALSE	FALSE
cg04831900	chr1	93882548	93882547	FALSE	TRUE	FALSE	TRUE	FALSE	FALSE
cg04848349	chr1	117340217	117340216	FALSE	TRUE	FALSE	TRUE	FALSE	FALSE
cg04850211	chr1	228276532	228276531	FALSE	TRUE	FALSE	TRUE	TRUE	FALSE
cg04872610	chr1	113905868	113905867	FALSE	TRUE	TRUE	FALSE	FALSE	FALSE
cg04892437	chr1	231602156	231602155	FALSE	TRUE	TRUE	TRUE	TRUE	FALSE
cg04899629	chr1	247531230	247531229	FALSE	TRUE	TRUE	TRUE	TRUE	FALSE
cg04904030	chr1	201284844	201284843	FALSE	TRUE	TRUE	TRUE	FALSE	FALSE
cg04907595	chr1	24931774	24931773	FALSE	TRUE	FALSE	FALSE	FALSE	FALSE
cg04921771	chr1	39884016	39884015	FALSE	TRUE	FALSE	TRUE	TRUE	FALSE
cg04990556	chr1	26306848	26306847	FALSE	TRUE	TRUE	TRUE	FALSE	FALSE
cg05005077	chr1	247113665	247113664	FALSE	TRUE	TRUE	TRUE	TRUE	FALSE
cg05049280	chr1	109612914	109612913	FALSE	TRUE	TRUE	TRUE	FALSE	FALSE
cg05051043	chr1	233905020	233905019	FALSE	TRUE	TRUE	TRUE	FALSE	FALSE
cg05157272	chr1	246698955	246698954	FALSE	TRUE	TRUE	TRUE	FALSE	FALSE
cg05160879	chr1	177353743	177353742	FALSE	TRUE	FALSE	TRUE	FALSE	FALSE
cg05172122	chr1	118984161	118984160	FALSE	TRUE	FALSE	FALSE	FALSE	FALSE
cg05184311	chr1	201284410	201284409	FALSE	TRUE	FALSE	TRUE	TRUE	FALSE
cg05228408	chr1	11805296	11805295	FALSE	TRUE	FALSE	TRUE	FALSE	FALSE
cg05269784	chr1	22593677	22593676	FALSE	TRUE	TRUE	TRUE	TRUE	FALSE
cg05306153	chr1	54950742	54950741	FALSE	TRUE	TRUE	TRUE	FALSE	FALSE
cg05392764	chr1	161727263	161727262	FALSE	TRUE	TRUE	TRUE	FALSE	FALSE
cg05461140	chr1	54298961	54298960	FALSE	TRUE	TRUE	TRUE	FALSE	FALSE
cg05480453	chr1	53078943	53078942	FALSE	TRUE	TRUE	TRUE	FALSE	FALSE
cg05528516	chr1	1134661	1134660	FALSE	TRUE	FALSE	TRUE	FALSE	FALSE
cg05598546	chr1	75786082	75786081	FALSE	TRUE	TRUE	TRUE	FALSE	FALSE
cg05697835	chr1	2806247	2806246	FALSE	TRUE	TRUE	TRUE	FALSE	FALSE
cg05762488	chr1	63674662	63674661	FALSE	TRUE	FALSE	TRUE	TRUE	FALSE
cg05785348	chr1	211382488	211382487	FALSE	TRUE	FALSE	FALSE	TRUE	FALSE
cg05803265	chr1	53886535	53886534	FALSE	TRUE	TRUE	TRUE	FALSE	FALSE
cg05887270	chr1	25803137	25803136	FALSE	TRUE	FALSE	TRUE	FALSE	FALSE
cg05941864	chr1	22567486	22567485	FALSE	TRUE	FALSE	FALSE	FALSE	FALSE
cg06121193	chr1	89816853	89816852	FALSE	TRUE	TRUE	TRUE	FALSE	FALSE
cg06178315	chr1	3858295	3858294	FALSE	TRUE	TRUE	TRUE	TRUE	FALSE
cg06190807	chr1	62194517	62194516	FALSE	TRUE	TRUE	TRUE	FALSE	FALSE
cg06221449	chr1	28775518	28775517	FALSE	TRUE	TRUE	TRUE	FALSE	FALSE
cg06225634	chr1	220893011	220893010	FALSE	TRUE	TRUE	TRUE	FALSE	FALSE
cg06261630	chr1	228553651	228553650	FALSE	TRUE	TRUE	TRUE	FALSE	FALSE
cg06346857	chr1	21551087	21551086	FALSE	TRUE	FALSE	FALSE	FALSE	FALSE
cg06365898	chr1	16207413	16207412	FALSE	TRUE	TRUE	TRUE	TRUE	FALSE
cg06769739	chr1	17476197	17476196	FALSE	TRUE	FALSE	TRUE	FALSE	FALSE
cg06784218	chr1	45624133	45624132	FALSE	TRUE	TRUE	TRUE	FALSE	FALSE
cg06828127	chr1	230517657	230517656	FALSE	TRUE	FALSE	TRUE	FALSE	FALSE
cg06853416	chr1	2862277	2862276	FALSE	TRUE	TRUE	FALSE	TRUE	FALSE
cg06854150	chr1	116961331	116961330	FALSE	TRUE	TRUE	FALSE	FALSE	FALSE
cg06872770	chr1	3771565	3771564	FALSE	TRUE	FALSE	TRUE	FALSE	FALSE
cg06905679	chr1	53542454	53542453	FALSE	TRUE	FALSE	TRUE	FALSE	FALSE
cg06916670	chr1	202860818	202860817	FALSE	TRUE	TRUE	TRUE	TRUE	FALSE
cg06932256	chr1	109655726	109655725	FALSE	TRUE	TRUE	TRUE	TRUE	FALSE
cg06935979	chr1	232805961	232805960	FALSE	TRUE	TRUE	TRUE	TRUE	FALSE
cg06940482	chr1	81802497	81802496	FALSE	TRUE	FALSE	TRUE	FALSE	FALSE
cg06954535	chr1	153349536	153349535	FALSE	TRUE	FALSE	TRUE	TRUE	FALSE
cg06956784	chr1	17734011	17734010	FALSE	TRUE	TRUE	TRUE	TRUE	FALSE
cg06959664	chr1	17689154	17689153	FALSE	TRUE	FALSE	TRUE	FALSE	FALSE
cg06965961	chr1	226083041	226083040	FALSE	TRUE	TRUE	TRUE	TRUE	FALSE
cg06970220	chr1	156194070	156194069	FALSE	TRUE	TRUE	TRUE	FALSE	FALSE
cg06988547	chr1	2923199	2923198	FALSE	TRUE	TRUE	TRUE	FALSE	FALSE
cg06991974	chr1	3067655	3067654	FALSE	TRUE	TRUE	FALSE	FALSE	FALSE
cg06995548	chr1	46543856	46543855	FALSE	TRUE	FALSE	TRUE	TRUE	FALSE
cg07015554	chr1	38608431	38608430	FALSE	TRUE	TRUE	TRUE	TRUE	FALSE
cg07017454	chr1	91546423	91546422	FALSE	TRUE	FALSE	TRUE	FALSE	FALSE
cg07044276	chr1	246696588	246696587	FALSE	TRUE	TRUE	TRUE	TRUE	FALSE
cg07049167	chr1	166849270	166849269	FALSE	TRUE	TRUE	TRUE	FALSE	FALSE
cg07090424	chr1	22208999	22208998	FALSE	TRUE	FALSE	TRUE	FALSE	FALSE
cg07092448	chr1	151790738	151790737	FALSE	TRUE	TRUE	TRUE	TRUE	FALSE
cg07133347	chr1	107058141	107058140	FALSE	TRUE	FALSE	TRUE	FALSE	FALSE
cg07139329	chr1	201739431	201739430	FALSE	TRUE	TRUE	TRUE	TRUE	FALSE
cg07147364	chr1	19643763	19643762	FALSE	TRUE	FALSE	TRUE	FALSE	FALSE
cg07148744	chr1	28247367	28247366	FALSE	TRUE	TRUE	TRUE	FALSE	FALSE
cg07174182	chr1	50661890	50661889	FALSE	TRUE	TRUE	FALSE	FALSE	FALSE
cg07180646	chr1	15155046	15155045	FALSE	TRUE	TRUE	TRUE	TRUE	FALSE
cg07192718	chr1	54980165	54980164	FALSE	TRUE	TRUE	TRUE	FALSE	FALSE
cg07240000	chr1	17552044	17552043	FALSE	TRUE	FALSE	TRUE	FALSE	FALSE
cg07241917	chr1	220896358	220896357	FALSE	TRUE	FALSE	TRUE	FALSE	FALSE
cg07313626	chr1	247518630	247518629	FALSE	TRUE	TRUE	TRUE	FALSE	FALSE
cg07350718	chr1	85580159	85580158	FALSE	TRUE	FALSE	TRUE	TRUE	FALSE
cg07390924	chr1	966346	966345	FALSE	TRUE	TRUE	TRUE	FALSE	FALSE
cg07420232	chr1	21775549	21775548	FALSE	TRUE	FALSE	TRUE	FALSE	FALSE
cg07555102	chr1	10636010	10636009	FALSE	TRUE	FALSE	FALSE	FALSE	FALSE
cg07591362	chr1	232142964	232142963	FALSE	TRUE	FALSE	TRUE	FALSE	FALSE
cg07702888	chr1	156369003	156369002	FALSE	TRUE	FALSE	FALSE	FALSE	FALSE
cg07731304	chr1	12064058	12064057	FALSE	TRUE	FALSE	TRUE	FALSE	FALSE
cg07794010	chr1	114122996	114122995	FALSE	TRUE	TRUE	TRUE	FALSE	FALSE
cg07802625	chr1	31816065	31816064	FALSE	TRUE	FALSE	TRUE	FALSE	FALSE
cg07817055	chr1	232697118	232697117	FALSE	TRUE	TRUE	TRUE	FALSE	FALSE
cg07821297	chr1	152623702	152623701	FALSE	TRUE	FALSE	TRUE	FALSE	FALSE
cg07833779	chr1	111508151	111508150	FALSE	TRUE	TRUE	TRUE	TRUE	FALSE
cg07913096	chr1	28247430	28247429	FALSE	TRUE	TRUE	TRUE	FALSE	FALSE
cg07916101	chr1	26164557	26164556	FALSE	TRUE	TRUE	FALSE	FALSE	FALSE
cg07928641	chr1	183022713	183022712	FALSE	TRUE	FALSE	TRUE	FALSE	FALSE
cg07972572	chr1	203267942	203267941	FALSE	TRUE	TRUE	TRUE	FALSE	FALSE
cg07977614	chr1	242146844	242146843	FALSE	TRUE	FALSE	FALSE	TRUE	FALSE
cg08116724	chr1	42765961	42765960	FALSE	TRUE	FALSE	TRUE	FALSE	FALSE
cg08162294	chr1	201154639	201154638	FALSE	TRUE	TRUE	TRUE	FALSE	FALSE
cg08163621	chr1	6625937	6625936	FALSE	TRUE	FALSE	FALSE	FALSE	FALSE
cg08166631	chr1	40133340	40133339	FALSE	TRUE	TRUE	TRUE	FALSE	FALSE
cg08479277	chr1	84884950	84884949	FALSE	TRUE	FALSE	TRUE	TRUE	FALSE
cg08572767	chr1	26317744	26317743	FALSE	TRUE	FALSE	TRUE	FALSE	FALSE
cg08587864	chr1	172444473	172444472	FALSE	TRUE	FALSE	TRUE	FALSE	FALSE
cg08644365	chr1	203151067	203151066	FALSE	TRUE	FALSE	TRUE	TRUE	FALSE
cg08702915	chr1	75788004	75788003	FALSE	TRUE	TRUE	TRUE	FALSE	FALSE
cg08764927	chr1	7784836	7784835	FALSE	TRUE	FALSE	TRUE	FALSE	FALSE
cg08844966	chr1	18108751	18108750	FALSE	TRUE	FALSE	TRUE	TRUE	FALSE
cg08853451	chr1	26220887	26220886	FALSE	TRUE	TRUE	TRUE	FALSE	FALSE
cg08854313	chr1	11262475	11262474	FALSE	TRUE	TRUE	TRUE	FALSE	FALSE
cg08855938	chr1	214225141	214225140	FALSE	TRUE	TRUE	TRUE	FALSE	FALSE
cg08861456	chr1	247936975	247936974	FALSE	TRUE	TRUE	TRUE	TRUE	FALSE
cg08872493	chr1	23194925	23194924	FALSE	TRUE	FALSE	FALSE	FALSE	FALSE
cg08873628	chr1	175193212	175193211	FALSE	TRUE	FALSE	TRUE	FALSE	FALSE
cg08925398	chr1	202967884	202967883	FALSE	TRUE	TRUE	TRUE	FALSE	FALSE
cg09010107	chr1	170669667	170669666	FALSE	TRUE	FALSE	TRUE	FALSE	FALSE
cg09033006	chr1	244353876	244353875	FALSE	TRUE	TRUE	TRUE	TRUE	FALSE
cg09072162	chr1	55039508	55039507	FALSE	TRUE	FALSE	TRUE	FALSE	FALSE
cg09125532	chr1	21349656	21349655	FALSE	TRUE	FALSE	FALSE	FALSE	FALSE
cg09127314	chr1	152189208	152189207	FALSE	TRUE	FALSE	TRUE	TRUE	FALSE
cg09212118	chr1	42164856	42164855	FALSE	TRUE	FALSE	FALSE	FALSE	FALSE
cg09219402	chr1	247119157	247119156	FALSE	TRUE	FALSE	TRUE	FALSE	FALSE
cg09363892	chr1	1019240	1019239	FALSE	TRUE	TRUE	FALSE	FALSE	FALSE
cg09367891	chr1	107056625	107056624	FALSE	TRUE	TRUE	TRUE	FALSE	FALSE
cg09369927	chr1	228005885	228005884	FALSE	TRUE	TRUE	TRUE	FALSE	FALSE
cg09396704	chr1	203076102	203076101	FALSE	TRUE	FALSE	TRUE	FALSE	FALSE
cg09506761	chr1	232129517	232129516	FALSE	TRUE	TRUE	TRUE	FALSE	FALSE
cg09663655	chr1	3083165	3083164	FALSE	TRUE	TRUE	FALSE	FALSE	FALSE
cg09664975	chr1	84077869	84077868	FALSE	TRUE	FALSE	FALSE	FALSE	FALSE
cg09674468	chr1	234164554	234164553	FALSE	TRUE	FALSE	FALSE	FALSE	FALSE
cg09704415	chr1	48471579	48471578	FALSE	TRUE	FALSE	TRUE	FALSE	FALSE
cg09815769	chr1	118997116	118997115	FALSE	TRUE	TRUE	TRUE	TRUE	FALSE
cg09824328	chr1	42959742	42959741	FALSE	TRUE	FALSE	TRUE	TRUE	FALSE
cg09872491	chr1	11899085	11899084	FALSE	TRUE	FALSE	TRUE	FALSE	FALSE
cg10018522	chr1	228986955	228986954	FALSE	TRUE	TRUE	FALSE	TRUE	FALSE
cg10018845	chr1	99766469	99766468	FALSE	TRUE	FALSE	FALSE	FALSE	FALSE
cg10025904	chr1	89530773	89530772	FALSE	TRUE	TRUE	TRUE	TRUE	FALSE
cg10059687	chr1	6466070	6466069	FALSE	TRUE	FALSE	TRUE	FALSE	FALSE
cg10074409	chr1	209806033	209806032	FALSE	TRUE	TRUE	TRUE	TRUE	FALSE
cg10143960	chr1	1174107	1174106	FALSE	TRUE	FALSE	TRUE	TRUE	FALSE
cg10197057	chr1	42146848	42146847	FALSE	TRUE	FALSE	TRUE	TRUE	FALSE
cg10207181	chr1	148328966	148328965	FALSE	TRUE	FALSE	FALSE	FALSE	FALSE
cg10227331	chr1	8121588	8121587	FALSE	TRUE	FALSE	TRUE	FALSE	FALSE
cg10312476	chr1	29453757	29453756	FALSE	TRUE	FALSE	TRUE	TRUE	FALSE
cg10314909	chr1	2593452	2593451	FALSE	TRUE	FALSE	TRUE	TRUE	FALSE
cg10336193	chr1	206675045	206675044	FALSE	TRUE	TRUE	TRUE	TRUE	FALSE
cg10385390	chr1	7962446	7962445	FALSE	TRUE	FALSE	FALSE	FALSE	FALSE
cg10387543	chr1	28775557	28775556	FALSE	TRUE	TRUE	TRUE	TRUE	FALSE
cg10496302	chr1	175900638	175900637	FALSE	TRUE	TRUE	TRUE	FALSE	FALSE
cg10589385	chr1	150925962	150925961	FALSE	TRUE	TRUE	TRUE	FALSE	FALSE
cg10708898	chr1	34843703	34843702	FALSE	TRUE	FALSE	TRUE	FALSE	FALSE
cg10878114	chr1	233904300	233904299	FALSE	TRUE	TRUE	TRUE	TRUE	FALSE
cg10890233	chr1	91404826	91404825	FALSE	TRUE	FALSE	TRUE	FALSE	FALSE
cg10892335	chr1	53500646	53500645	FALSE	TRUE	FALSE	TRUE	FALSE	FALSE
cg10965749	chr1	54154223	54154222	FALSE	TRUE	FALSE	TRUE	FALSE	FALSE
cg10975889	chr1	220884467	220884466	FALSE	TRUE	TRUE	TRUE	FALSE	FALSE
cg10981580	chr1	236143468	236143467	FALSE	TRUE	FALSE	TRUE	FALSE	FALSE
cg11137277	chr1	234479491	234479490	FALSE	TRUE	FALSE	TRUE	FALSE	FALSE
cg11145399	chr1	223846777	223846776	FALSE	TRUE	FALSE	TRUE	FALSE	FALSE
cg11175836	chr1	18480207	18480206	FALSE	TRUE	TRUE	TRUE	TRUE	FALSE
cg11192688	chr1	171257564	171257563	FALSE	TRUE	FALSE	TRUE	FALSE	FALSE
cg11200797	chr1	1081091	1081090	FALSE	TRUE	FALSE	TRUE	FALSE	FALSE
cg11227541	chr1	84506635	84506634	FALSE	TRUE	FALSE	TRUE	FALSE	FALSE
cg11232944	chr1	18107079	18107078	FALSE	TRUE	TRUE	TRUE	TRUE	FALSE
cg11332951	chr1	2465034	2465033	FALSE	TRUE	FALSE	TRUE	FALSE	FALSE
cg11391637	chr1	38783644	38783643	FALSE	TRUE	FALSE	FALSE	FALSE	FALSE
cg11407681	chr1	166070682	166070681	FALSE	TRUE	FALSE	TRUE	FALSE	FALSE
cg11531272	chr1	21608187	21608186	FALSE	TRUE	TRUE	TRUE	TRUE	FALSE
cg11648968	chr1	85465434	85465433	FALSE	TRUE	TRUE	FALSE	FALSE	FALSE
cg11658707	chr1	244761581	244761580	FALSE	TRUE	FALSE	TRUE	FALSE	FALSE
cg11685510	chr1	112743776	112743775	FALSE	TRUE	TRUE	TRUE	TRUE	FALSE
cg11708721	chr1	116987388	116987387	FALSE	TRUE	TRUE	TRUE	FALSE	FALSE
cg11721177	chr1	22593381	22593380	FALSE	TRUE	FALSE	TRUE	TRUE	FALSE
cg11735311	chr1	41366978	41366977	FALSE	TRUE	FALSE	TRUE	TRUE	FALSE
cg11795921	chr1	230136910	230136909	FALSE	TRUE	FALSE	TRUE	TRUE	FALSE
cg11803389	chr1	45499349	45499348	FALSE	TRUE	FALSE	TRUE	FALSE	FALSE
cg11895451	chr1	16207397	16207396	FALSE	TRUE	TRUE	TRUE	TRUE	FALSE
cg11968713	chr1	204196982	204196981	FALSE	TRUE	FALSE	TRUE	TRUE	FALSE
cg11968804	chr1	212515106	212515105	FALSE	TRUE	TRUE	TRUE	FALSE	FALSE
cg11973900	chr1	175193175	175193174	FALSE	TRUE	FALSE	TRUE	FALSE	FALSE
cg11983977	chr1	147242370	147242369	FALSE	TRUE	TRUE	TRUE	TRUE	FALSE
cg12034118	chr1	209806143	209806142	FALSE	TRUE	TRUE	TRUE	TRUE	FALSE
cg12035532	chr1	1955327	1955326	FALSE	TRUE	TRUE	TRUE	FALSE	FALSE
cg12053004	chr1	220884410	220884409	FALSE	TRUE	FALSE	TRUE	FALSE	FALSE
cg12062270	chr1	21551032	21551031	FALSE	TRUE	FALSE	FALSE	FALSE	FALSE
cg12131894	chr1	2326456	2326455	FALSE	TRUE	TRUE	TRUE	FALSE	FALSE
cg12135344	chr1	6128061	6128060	FALSE	TRUE	TRUE	TRUE	TRUE	FALSE
cg12139725	chr1	37754110	37754109	FALSE	TRUE	FALSE	TRUE	FALSE	FALSE
cg12356261	chr1	156677468	156677467	FALSE	TRUE	FALSE	TRUE	TRUE	FALSE
cg12413421	chr1	37611790	37611789	FALSE	TRUE	FALSE	FALSE	TRUE	FALSE
cg12481266	chr1	205592679	205592678	FALSE	TRUE	TRUE	TRUE	FALSE	FALSE
cg12548638	chr1	37761141	37761140	FALSE	TRUE	TRUE	TRUE	FALSE	FALSE
cg12582028	chr1	151764224	151764223	FALSE	TRUE	FALSE	TRUE	FALSE	FALSE
cg12611449	chr1	201283073	201283072	FALSE	TRUE	TRUE	TRUE	FALSE	FALSE
cg12656391	chr1	42959486	42959485	FALSE	TRUE	FALSE	TRUE	TRUE	FALSE
cg12662007	chr1	201281058	201281057	FALSE	TRUE	FALSE	FALSE	FALSE	FALSE
cg12689752	chr1	156525762	156525761	FALSE	TRUE	FALSE	TRUE	TRUE	FALSE
cg12689806	chr1	247878984	247878983	FALSE	TRUE	TRUE	FALSE	FALSE	FALSE
cg12731349	chr1	204190492	204190491	FALSE	TRUE	FALSE	TRUE	TRUE	FALSE
cg12741441	chr1	62906633	62906632	FALSE	TRUE	FALSE	TRUE	FALSE	FALSE
cg12744634	chr1	26233813	26233812	FALSE	TRUE	TRUE	TRUE	FALSE	FALSE
cg12754571	chr1	247530970	247530969	FALSE	TRUE	TRUE	TRUE	FALSE	FALSE
cg12809031	chr1	36450104	36450103	FALSE	TRUE	TRUE	TRUE	FALSE	FALSE
cg12810297	chr1	199748102	199748101	FALSE	TRUE	FALSE	TRUE	TRUE	FALSE
cg12929805	chr1	2467616	2467615	FALSE	TRUE	TRUE	TRUE	FALSE	FALSE
cg13067553	chr1	148310345	148310344	FALSE	TRUE	FALSE	TRUE	TRUE	FALSE
cg13071333	chr1	152623407	152623406	FALSE	TRUE	TRUE	TRUE	FALSE	FALSE
cg13134475	chr1	30824252	30824251	FALSE	TRUE	FALSE	FALSE	FALSE	FALSE
cg13209980	chr1	158025251	158025250	FALSE	TRUE	FALSE	FALSE	FALSE	FALSE
cg13222036	chr1	187928499	187928498	FALSE	TRUE	FALSE	TRUE	FALSE	FALSE
cg13229857	chr1	200037120	200037119	FALSE	TRUE	TRUE	TRUE	TRUE	FALSE
cg13364230	chr1	34793179	34793178	FALSE	TRUE	FALSE	FALSE	TRUE	FALSE
cg13369817	chr1	54651194	54651193	FALSE	TRUE	FALSE	TRUE	TRUE	FALSE
cg13387374	chr1	19084613	19084612	FALSE	TRUE	TRUE	TRUE	FALSE	FALSE
cg13392957	chr1	148310172	148310171	FALSE	TRUE	FALSE	TRUE	TRUE	FALSE
cg13401533	chr1	37514313	37514312	FALSE	TRUE	TRUE	FALSE	FALSE	FALSE
cg13433694	chr1	43171569	43171568	FALSE	TRUE	TRUE	TRUE	TRUE	FALSE
cg13446689	chr1	172359238	172359237	FALSE	TRUE	FALSE	FALSE	FALSE	FALSE
cg13462599	chr1	151511736	151511735	FALSE	TRUE	FALSE	TRUE	FALSE	FALSE
cg13498757	chr1	152189452	152189451	FALSE	TRUE	FALSE	TRUE	TRUE	FALSE
cg13507429	chr1	18481057	18481056	FALSE	TRUE	FALSE	TRUE	FALSE	FALSE
cg13547559	chr1	85495107	85495106	FALSE	TRUE	FALSE	TRUE	TRUE	FALSE
cg13557213	chr1	96473975	96473974	FALSE	TRUE	TRUE	TRUE	FALSE	FALSE
cg13639937	chr1	91547099	91547098	FALSE	TRUE	TRUE	TRUE	FALSE	FALSE
cg13693328	chr1	9196283	9196282	FALSE	TRUE	FALSE	TRUE	FALSE	FALSE
cg13783323	chr1	26020602	26020601	FALSE	TRUE	FALSE	TRUE	FALSE	FALSE
cg13839957	chr1	6105424	6105423	FALSE	TRUE	TRUE	TRUE	FALSE	FALSE
cg13848905	chr1	179591566	179591565	FALSE	TRUE	TRUE	TRUE	FALSE	FALSE
cg13900770	chr1	74197953	74197952	FALSE	TRUE	FALSE	TRUE	FALSE	FALSE
cg13901501	chr1	165445278	165445277	FALSE	TRUE	FALSE	TRUE	TRUE	FALSE
cg13919466	chr1	31669898	31669897	FALSE	TRUE	FALSE	TRUE	TRUE	FALSE
cg13935009	chr1	205528586	205528585	FALSE	TRUE	TRUE	TRUE	TRUE	FALSE
cg14168733	chr1	201739591	201739590	FALSE	TRUE	TRUE	TRUE	TRUE	FALSE
cg14200305	chr1	3645559	3645558	FALSE	TRUE	TRUE	TRUE	FALSE	FALSE
cg14252661	chr1	162822824	162822823	FALSE	TRUE	FALSE	TRUE	FALSE	FALSE
cg14255644	chr1	228102047	228102046	FALSE	TRUE	TRUE	TRUE	TRUE	FALSE
cg14263176	chr1	201888660	201888659	FALSE	TRUE	TRUE	TRUE	FALSE	FALSE
cg14264194	chr1	211479208	211479207	FALSE	TRUE	TRUE	TRUE	TRUE	FALSE
cg14626797	chr1	67054576	67054575	FALSE	TRUE	FALSE	TRUE	TRUE	FALSE
cg14793596	chr1	1354713	1354712	FALSE	TRUE	TRUE	TRUE	FALSE	FALSE
cg14830002	chr1	247453385	247453384	FALSE	TRUE	TRUE	TRUE	TRUE	FALSE
cg14850026	chr1	62194520	62194519	FALSE	TRUE	TRUE	TRUE	FALSE	FALSE
cg14884203	chr1	100352652	100352651	FALSE	TRUE	FALSE	FALSE	FALSE	FALSE
cg14976190	chr1	1684298	1684297	FALSE	TRUE	TRUE	FALSE	FALSE	FALSE
cg15069758	chr1	109656110	109656109	FALSE	TRUE	TRUE	TRUE	TRUE	FALSE
cg15089806	chr1	42952529	42952528	FALSE	TRUE	FALSE	TRUE	TRUE	FALSE
cg15104031	chr1	153617053	153617052	FALSE	TRUE	TRUE	TRUE	FALSE	FALSE
cg15363333	chr1	230332866	230332865	FALSE	TRUE	TRUE	TRUE	TRUE	FALSE
cg15468180	chr1	107057788	107057787	FALSE	TRUE	TRUE	TRUE	FALSE	FALSE
cg15481791	chr1	203860763	203860762	FALSE	TRUE	FALSE	TRUE	FALSE	FALSE
cg15501359	chr1	46719380	46719379	FALSE	TRUE	FALSE	FALSE	FALSE	FALSE
cg15558982	chr1	115089642	115089641	FALSE	TRUE	FALSE	TRUE	FALSE	FALSE
cg15595212	chr1	247936882	247936881	FALSE	TRUE	TRUE	TRUE	FALSE	FALSE
cg15633273	chr1	225809337	225809336	FALSE	TRUE	TRUE	TRUE	FALSE	FALSE
cg15686842	chr1	100895114	100895113	FALSE	TRUE	FALSE	TRUE	FALSE	FALSE
cg15718594	chr1	212701401	212701400	FALSE	TRUE	TRUE	TRUE	FALSE	FALSE
cg15724945	chr1	119005905	119005904	FALSE	TRUE	TRUE	TRUE	FALSE	FALSE
cg16047663	chr1	202005914	202005913	FALSE	TRUE	TRUE	TRUE	FALSE	FALSE
cg16050974	chr1	9997643	9997642	FALSE	TRUE	TRUE	TRUE	FALSE	FALSE
cg16056164	chr1	233075827	233075826	FALSE	TRUE	FALSE	TRUE	FALSE	FALSE
cg16107724	chr1	30685453	30685452	FALSE	TRUE	FALSE	TRUE	FALSE	FALSE
cg16265717	chr1	65527467	65527466	FALSE	TRUE	FALSE	TRUE	FALSE	FALSE
cg16270485	chr1	21574768	21574767	FALSE	TRUE	TRUE	TRUE	FALSE	FALSE
cg16274678	chr1	154155477	154155476	FALSE	TRUE	FALSE	FALSE	FALSE	FALSE
cg16315020	chr1	108816554	108816553	FALSE	TRUE	FALSE	TRUE	FALSE	FALSE
cg16356856	chr1	74197900	74197899	FALSE	TRUE	TRUE	TRUE	FALSE	FALSE
cg16409744	chr1	171781643	171781642	FALSE	TRUE	TRUE	TRUE	FALSE	FALSE
cg16411216	chr1	9280449	9280448	FALSE	TRUE	FALSE	FALSE	FALSE	FALSE
cg16414821	chr1	151544303	151544302	FALSE	TRUE	TRUE	TRUE	FALSE	FALSE
cg16430505	chr1	23225363	23225362	FALSE	TRUE	FALSE	TRUE	TRUE	FALSE
cg16555417	chr1	40133101	40133100	FALSE	TRUE	FALSE	TRUE	TRUE	FALSE
cg16562342	chr1	109240882	109240881	FALSE	TRUE	FALSE	TRUE	TRUE	FALSE
cg16578609	chr1	2467613	2467612	FALSE	TRUE	TRUE	TRUE	FALSE	FALSE
cg16661813	chr1	58546721	58546720	FALSE	TRUE	FALSE	FALSE	FALSE	FALSE
cg16724148	chr1	99860783	99860782	FALSE	TRUE	FALSE	TRUE	FALSE	FALSE
cg16990168	chr1	118983438	118983437	FALSE	TRUE	TRUE	FALSE	FALSE	FALSE
cg16999099	chr1	180232005	180232004	FALSE	TRUE	FALSE	TRUE	FALSE	FALSE
cg17031739	chr1	67134490	67134489	FALSE	TRUE	TRUE	TRUE	FALSE	FALSE
cg17109725	chr1	18380986	18380985	FALSE	TRUE	FALSE	TRUE	TRUE	FALSE
cg17127511	chr1	53080934	53080933	FALSE	TRUE	TRUE	FALSE	FALSE	FALSE
cg17127702	chr1	226406623	226406622	FALSE	TRUE	FALSE	TRUE	TRUE	FALSE
cg17132079	chr1	1358761	1358760	FALSE	TRUE	FALSE	TRUE	FALSE	FALSE
cg17167920	chr1	154155062	154155061	FALSE	TRUE	TRUE	TRUE	FALSE	FALSE
cg17220055	chr1	41783328	41783327	FALSE	TRUE	TRUE	TRUE	FALSE	FALSE
cg17243654	chr1	109273659	109273658	FALSE	TRUE	TRUE	TRUE	TRUE	FALSE
cg17329292	chr1	33430290	33430289	FALSE	TRUE	FALSE	FALSE	TRUE	FALSE
cg17339202	chr1	32695300	32695299	FALSE	TRUE	TRUE	TRUE	TRUE	FALSE
cg17383186	chr1	154155154	154155153	FALSE	TRUE	FALSE	TRUE	FALSE	FALSE
cg17415326	chr1	78885234	78885233	FALSE	TRUE	FALSE	TRUE	FALSE	FALSE
cg17420885	chr1	87134764	87134763	FALSE	TRUE	TRUE	TRUE	FALSE	FALSE
cg17429686	chr1	2639791	2639790	FALSE	TRUE	FALSE	TRUE	FALSE	FALSE
cg17435683	chr1	3314046	3314045	FALSE	TRUE	FALSE	TRUE	FALSE	FALSE
cg17463745	chr1	16227908	16227907	FALSE	TRUE	TRUE	TRUE	FALSE	FALSE
cg17484671	chr1	30685312	30685311	FALSE	TRUE	FALSE	TRUE	FALSE	FALSE
cg17491146	chr1	223480045	223480044	FALSE	TRUE	TRUE	TRUE	FALSE	FALSE
cg17514168	chr1	248627197	248627196	FALSE	TRUE	TRUE	TRUE	FALSE	FALSE
cg17600851	chr1	84997175	84997174	FALSE	TRUE	TRUE	TRUE	FALSE	FALSE
cg17748822	chr1	39768370	39768369	FALSE	TRUE	FALSE	FALSE	FALSE	FALSE
cg17803965	chr1	31816212	31816211	FALSE	TRUE	TRUE	TRUE	FALSE	FALSE
cg17822955	chr1	209354147	209354146	FALSE	TRUE	TRUE	TRUE	FALSE	FALSE
cg17826594	chr1	55040342	55040341	FALSE	TRUE	TRUE	TRUE	TRUE	FALSE
cg17891251	chr1	56820593	56820592	FALSE	TRUE	FALSE	TRUE	FALSE	FALSE
cg18115428	chr1	233904233	233904232	FALSE	TRUE	TRUE	TRUE	TRUE	FALSE
cg18126557	chr1	247448541	247448540	FALSE	TRUE	FALSE	TRUE	FALSE	FALSE
cg18140268	chr1	148309720	148309719	FALSE	TRUE	FALSE	TRUE	FALSE	FALSE
cg18147098	chr1	212515575	212515574	FALSE	TRUE	TRUE	TRUE	TRUE	FALSE
cg18152455	chr1	12128581	12128580	FALSE	TRUE	TRUE	TRUE	FALSE	FALSE
cg18163442	chr1	2862497	2862496	FALSE	TRUE	FALSE	FALSE	TRUE	FALSE
cg18177731	chr1	18922883	18922882	FALSE	TRUE	FALSE	TRUE	FALSE	FALSE
cg18180276	chr1	108121320	108121319	FALSE	TRUE	TRUE	TRUE	TRUE	FALSE
cg18184411	chr1	52843590	52843589	FALSE	TRUE	FALSE	TRUE	TRUE	FALSE
cg18187658	chr1	230158945	230158944	FALSE	TRUE	FALSE	FALSE	FALSE	FALSE
cg18206481	chr1	165235266	165235265	FALSE	TRUE	TRUE	TRUE	FALSE	FALSE
cg18217145	chr1	39789024	39789023	FALSE	TRUE	TRUE	TRUE	FALSE	FALSE
cg18217832	chr1	237032367	237032366	FALSE	TRUE	TRUE	TRUE	TRUE	FALSE
cg18238718	chr1	33276769	33276768	FALSE	TRUE	TRUE	TRUE	FALSE	FALSE
cg18315861	chr1	248626676	248626675	FALSE	TRUE	TRUE	TRUE	FALSE	FALSE
cg18323236	chr1	24416540	24416539	FALSE	TRUE	FALSE	TRUE	TRUE	FALSE
cg18384681	chr1	54996454	54996453	FALSE	TRUE	TRUE	TRUE	TRUE	FALSE
cg18432292	chr1	1068376	1068375	FALSE	TRUE	FALSE	FALSE	FALSE	FALSE
cg18564989	chr1	226223357	226223356	FALSE	TRUE	TRUE	TRUE	FALSE	FALSE
cg18783781	chr1	9539009	9539008	FALSE	TRUE	FALSE	FALSE	FALSE	FALSE
cg18789685	chr1	21537828	21537827	FALSE	TRUE	TRUE	TRUE	TRUE	FALSE
cg18863156	chr1	180235283	180235282	FALSE	TRUE	FALSE	FALSE	FALSE	FALSE
cg18888403	chr1	23826285	23826284	FALSE	TRUE	TRUE	TRUE	TRUE	FALSE
cg19022717	chr1	156924743	156924742	FALSE	TRUE	FALSE	TRUE	FALSE	FALSE
cg19023876	chr1	247448630	247448629	FALSE	TRUE	FALSE	TRUE	TRUE	FALSE
cg19161000	chr1	177182485	177182484	FALSE	TRUE	FALSE	FALSE	FALSE	FALSE
cg19377703	chr1	48207980	48207979	FALSE	TRUE	FALSE	TRUE	FALSE	FALSE
cg19628553	chr1	201154990	201154989	FALSE	TRUE	TRUE	TRUE	FALSE	FALSE
cg19634242	chr1	74673281	74673280	FALSE	TRUE	FALSE	TRUE	FALSE	FALSE
cg19662687	chr1	161367890	161367889	FALSE	TRUE	FALSE	TRUE	FALSE	FALSE
cg19676312	chr1	201982459	201982458	FALSE	TRUE	FALSE	FALSE	FALSE	FALSE
cg19681188	chr1	202861071	202861070	FALSE	TRUE	TRUE	FALSE	FALSE	FALSE
cg19720265	chr1	220527542	220527541	FALSE	TRUE	FALSE	FALSE	FALSE	FALSE
cg19728577	chr1	42153493	42153492	FALSE	TRUE	TRUE	TRUE	FALSE	FALSE
cg19735514	chr1	161792950	161792949	FALSE	TRUE	TRUE	TRUE	FALSE	FALSE
cg19746897	chr1	38292070	38292069	FALSE	TRUE	TRUE	TRUE	TRUE	FALSE
cg19757176	chr1	154155566	154155565	FALSE	TRUE	FALSE	TRUE	FALSE	FALSE
cg19769827	chr1	203290645	203290644	FALSE	TRUE	FALSE	TRUE	FALSE	FALSE
cg19827875	chr1	201649157	201649156	FALSE	TRUE	TRUE	TRUE	FALSE	FALSE
cg19879264	chr1	235504682	235504681	FALSE	TRUE	FALSE	FALSE	FALSE	FALSE
cg19884600	chr1	158932149	158932148	FALSE	TRUE	FALSE	TRUE	FALSE	FALSE
cg19903196	chr1	212255890	212255889	FALSE	TRUE	FALSE	TRUE	TRUE	FALSE
cg20012024	chr1	161021760	161021759	FALSE	TRUE	TRUE	TRUE	FALSE	FALSE
cg20200200	chr1	18480895	18480894	FALSE	TRUE	FALSE	TRUE	TRUE	FALSE
cg20282814	chr1	42957402	42957401	FALSE	TRUE	TRUE	TRUE	FALSE	FALSE
cg20290145	chr1	52994305	52994304	FALSE	TRUE	FALSE	FALSE	FALSE	FALSE
cg20306265	chr1	117615003	117615002	FALSE	TRUE	FALSE	TRUE	FALSE	FALSE
cg20411340	chr1	1239991	1239990	FALSE	TRUE	FALSE	TRUE	FALSE	FALSE
cg20414749	chr1	205212134	205212133	FALSE	TRUE	FALSE	TRUE	FALSE	FALSE
cg20433521	chr1	24556501	24556500	FALSE	TRUE	FALSE	TRUE	FALSE	FALSE
cg20452714	chr1	43933398	43933397	FALSE	TRUE	FALSE	TRUE	FALSE	FALSE
cg20507276	chr1	247937299	247937298	FALSE	TRUE	TRUE	TRUE	TRUE	FALSE
cg20611680	chr1	16227677	16227676	FALSE	TRUE	TRUE	TRUE	FALSE	FALSE
cg20674490	chr1	24914442	24914441	FALSE	TRUE	FALSE	TRUE	TRUE	FALSE
cg20678835	chr1	23194840	23194839	FALSE	TRUE	FALSE	TRUE	FALSE	FALSE
cg20681877	chr1	7461091	7461090	FALSE	TRUE	FALSE	FALSE	FALSE	FALSE
cg20694572	chr1	152359054	152359053	FALSE	TRUE	TRUE	TRUE	TRUE	FALSE
cg20699340	chr1	230332954	230332953	FALSE	TRUE	TRUE	TRUE	TRUE	FALSE
cg20739354	chr1	153926077	153926076	FALSE	TRUE	TRUE	TRUE	FALSE	FALSE
cg20826610	chr1	25909378	25909377	FALSE	TRUE	TRUE	FALSE	FALSE	FALSE
cg20829055	chr1	173827362	173827361	FALSE	TRUE	FALSE	FALSE	FALSE	FALSE
cg20849121	chr1	12619946	12619945	FALSE	TRUE	FALSE	TRUE	FALSE	FALSE
cg20967006	chr1	51877729	51877728	FALSE	TRUE	TRUE	TRUE	FALSE	FALSE
cg20976159	chr1	228005829	228005828	FALSE	TRUE	TRUE	TRUE	TRUE	FALSE
cg20991723	chr1	152534447	152534446	FALSE	TRUE	TRUE	TRUE	FALSE	FALSE
cg21105875	chr1	202809742	202809741	FALSE	TRUE	TRUE	TRUE	FALSE	FALSE
cg21109485	chr1	11701240	11701239	FALSE	TRUE	FALSE	TRUE	FALSE	FALSE
cg21155367	chr1	89763537	89763536	FALSE	TRUE	FALSE	TRUE	FALSE	FALSE
cg21288685	chr1	1173865	1173864	FALSE	TRUE	FALSE	TRUE	FALSE	FALSE
cg21298759	chr1	24415234	24415233	FALSE	TRUE	FALSE	TRUE	FALSE	FALSE
cg21300267	chr1	26220569	26220568	FALSE	TRUE	TRUE	TRUE	TRUE	FALSE
cg21304285	chr1	244362670	244362669	FALSE	TRUE	FALSE	TRUE	TRUE	FALSE
cg21406461	chr1	159009168	159009167	FALSE	TRUE	FALSE	TRUE	TRUE	FALSE
cg21451998	chr1	109655619	109655618	FALSE	TRUE	FALSE	TRUE	FALSE	FALSE
cg21534299	chr1	44355803	44355802	FALSE	TRUE	TRUE	TRUE	FALSE	FALSE
cg21535606	chr1	47446269	47446268	FALSE	TRUE	FALSE	FALSE	FALSE	FALSE
cg21577315	chr1	28233038	28233037	FALSE	TRUE	FALSE	TRUE	FALSE	FALSE
cg21645973	chr1	17587576	17587575	FALSE	TRUE	TRUE	TRUE	TRUE	FALSE
cg21679391	chr1	1351538	1351537	FALSE	TRUE	FALSE	TRUE	FALSE	FALSE
cg21684588	chr1	67134583	67134582	FALSE	TRUE	TRUE	TRUE	TRUE	FALSE
cg21695830	chr1	88991780	88991779	FALSE	TRUE	TRUE	TRUE	FALSE	FALSE
cg21815807	chr1	20548603	20548602	FALSE	TRUE	FALSE	TRUE	TRUE	FALSE
cg21880765	chr1	227775093	227775092	FALSE	TRUE	FALSE	TRUE	FALSE	FALSE
cg21906852	chr1	74732899	74732898	FALSE	TRUE	TRUE	TRUE	TRUE	FALSE
cg21908664	chr1	222814245	222814244	FALSE	TRUE	FALSE	TRUE	TRUE	FALSE
cg21966975	chr1	17248926	17248925	FALSE	TRUE	FALSE	TRUE	TRUE	FALSE
cg22047469	chr1	1174728	1174727	FALSE	TRUE	FALSE	TRUE	TRUE	FALSE
cg22080281	chr1	226189358	226189357	FALSE	TRUE	FALSE	FALSE	FALSE	FALSE
cg22247664	chr1	109656505	109656504	FALSE	TRUE	TRUE	TRUE	FALSE	FALSE
cg22345063	chr1	47726031	47726030	FALSE	TRUE	FALSE	TRUE	TRUE	FALSE
cg22352176	chr1	222814504	222814503	FALSE	TRUE	TRUE	TRUE	TRUE	FALSE
cg22372968	chr1	84758654	84758653	FALSE	TRUE	TRUE	TRUE	FALSE	FALSE
cg22385719	chr1	247008189	247008188	FALSE	TRUE	FALSE	TRUE	FALSE	FALSE
cg22433276	chr1	1137263	1137262	FALSE	TRUE	TRUE	TRUE	FALSE	FALSE
cg22475246	chr1	246724726	246724725	FALSE	TRUE	TRUE	TRUE	TRUE	FALSE
cg22488259	chr1	201739373	201739372	FALSE	TRUE	TRUE	TRUE	TRUE	FALSE
cg22498982	chr1	11909587	11909586	FALSE	TRUE	TRUE	TRUE	FALSE	FALSE
cg22502492	chr1	23371014	23371013	FALSE	TRUE	FALSE	TRUE	FALSE	FALSE
cg22507154	chr1	90719677	90719676	FALSE	TRUE	TRUE	TRUE	TRUE	FALSE
cg22525895	chr1	207803698	207803697	FALSE	TRUE	TRUE	TRUE	FALSE	FALSE
cg22697853	chr1	148264934	148264933	FALSE	TRUE	FALSE	TRUE	TRUE	FALSE
cg22698272	chr1	220881274	220881273	FALSE	TRUE	FALSE	TRUE	FALSE	FALSE
cg22719314	chr1	152317859	152317858	FALSE	TRUE	FALSE	TRUE	TRUE	FALSE
cg22724847	chr1	248349285	248349284	FALSE	TRUE	FALSE	TRUE	FALSE	FALSE
cg22729008	chr1	245418217	245418216	FALSE	TRUE	TRUE	FALSE	FALSE	FALSE
cg22776392	chr1	180954434	180954433	FALSE	TRUE	FALSE	TRUE	FALSE	FALSE
cg22792644	chr1	6554659	6554658	FALSE	TRUE	TRUE	TRUE	FALSE	FALSE
cg22920538	chr1	45010792	45010791	FALSE	TRUE	TRUE	FALSE	FALSE	FALSE
cg22943243	chr1	25905821	25905820	FALSE	TRUE	TRUE	TRUE	FALSE	FALSE
cg22945467	chr1	206923489	206923488	FALSE	TRUE	FALSE	FALSE	FALSE	FALSE
cg23019889	chr1	147072497	147072496	FALSE	TRUE	TRUE	FALSE	FALSE	FALSE
cg23035341	chr1	203860354	203860353	FALSE	TRUE	FALSE	TRUE	FALSE	FALSE
cg23105827	chr1	16212625	16212624	FALSE	TRUE	TRUE	TRUE	TRUE	FALSE
cg23162821	chr1	231528427	231528426	FALSE	TRUE	TRUE	TRUE	FALSE	FALSE
cg23206461	chr1	148310009	148310008	FALSE	TRUE	FALSE	TRUE	FALSE	FALSE
cg23216685	chr1	85708925	85708924	FALSE	TRUE	FALSE	TRUE	TRUE	FALSE
cg23228279	chr1	7697315	7697314	FALSE	TRUE	TRUE	TRUE	FALSE	FALSE
cg23229016	chr1	26546035	26546034	FALSE	TRUE	TRUE	TRUE	TRUE	FALSE
cg23238147	chr1	15112518	15112517	FALSE	TRUE	FALSE	TRUE	TRUE	FALSE
cg23614428	chr1	172529052	172529051	FALSE	TRUE	TRUE	TRUE	TRUE	FALSE
cg23617193	chr1	64506079	64506078	FALSE	TRUE	TRUE	TRUE	FALSE	FALSE
cg23639565	chr1	40042186	40042185	FALSE	TRUE	FALSE	TRUE	TRUE	FALSE
cg23645476	chr1	109739851	109739850	FALSE	TRUE	TRUE	TRUE	TRUE	FALSE
cg23724738	chr1	152565905	152565904	FALSE	TRUE	FALSE	TRUE	FALSE	FALSE
cg23729020	chr1	207751737	207751736	FALSE	TRUE	FALSE	TRUE	FALSE	FALSE
cg23803206	chr1	47333176	47333175	FALSE	TRUE	TRUE	TRUE	FALSE	FALSE
cg23913482	chr1	9234853	9234852	FALSE	TRUE	TRUE	TRUE	FALSE	FALSE
cg23954153	chr1	43936682	43936681	FALSE	TRUE	FALSE	TRUE	TRUE	FALSE
cg24034746	chr1	1240472	1240471	FALSE	TRUE	FALSE	TRUE	FALSE	FALSE
cg24053992	chr1	119011942	119011941	FALSE	TRUE	TRUE	FALSE	FALSE	FALSE
cg24083324	chr1	213989262	213989261	FALSE	TRUE	TRUE	TRUE	FALSE	FALSE
cg24150153	chr1	94237908	94237907	FALSE	TRUE	FALSE	FALSE	FALSE	FALSE
cg24160082	chr1	53889900	53889899	FALSE	TRUE	FALSE	TRUE	FALSE	FALSE
cg24250549	chr1	154936765	154936764	FALSE	TRUE	TRUE	TRUE	FALSE	FALSE
cg24312874	chr1	2811381	2811380	FALSE	TRUE	FALSE	TRUE	FALSE	FALSE
cg24349832	chr1	15152353	15152352	FALSE	TRUE	FALSE	TRUE	FALSE	FALSE
cg24406619	chr1	53146313	53146312	FALSE	TRUE	FALSE	TRUE	FALSE	FALSE
cg24465943	chr1	161215272	161215271	FALSE	TRUE	FALSE	TRUE	TRUE	FALSE
cg24467349	chr1	109712214	109712213	FALSE	TRUE	TRUE	TRUE	FALSE	FALSE
cg24498305	chr1	154568429	154568428	FALSE	TRUE	TRUE	TRUE	FALSE	FALSE
cg24506221	chr1	109687780	109687779	FALSE	TRUE	FALSE	TRUE	FALSE	FALSE
cg24519413	chr1	26164050	26164049	FALSE	TRUE	TRUE	TRUE	TRUE	FALSE
cg24537942	chr1	62286283	62286282	FALSE	TRUE	TRUE	TRUE	FALSE	FALSE
cg24550112	chr1	13701027	13701026	FALSE	TRUE	FALSE	TRUE	TRUE	FALSE
cg24553170	chr1	48777801	48777800	FALSE	TRUE	TRUE	TRUE	TRUE	FALSE
cg24580071	chr1	76154587	76154586	FALSE	TRUE	TRUE	TRUE	TRUE	FALSE
cg24596570	chr1	25819973	25819972	FALSE	TRUE	TRUE	TRUE	FALSE	FALSE
cg24722348	chr1	21574495	21574494	FALSE	TRUE	FALSE	TRUE	FALSE	FALSE
cg24861859	chr1	175505398	175505397	FALSE	TRUE	FALSE	TRUE	FALSE	FALSE
cg24879939	chr1	3314084	3314083	FALSE	TRUE	TRUE	TRUE	TRUE	FALSE
cg25192855	chr1	209805939	209805938	FALSE	TRUE	TRUE	TRUE	FALSE	FALSE
cg25193276	chr1	41435976	41435975	FALSE	TRUE	FALSE	TRUE	FALSE	FALSE
cg25198029	chr1	186975565	186975564	FALSE	TRUE	TRUE	FALSE	TRUE	FALSE
cg25210835	chr1	109712207	109712206	FALSE	TRUE	TRUE	TRUE	FALSE	FALSE
cg25276694	chr1	11648893	11648892	FALSE	TRUE	FALSE	TRUE	FALSE	FALSE
cg25287272	chr1	28886722	28886721	FALSE	TRUE	FALSE	TRUE	TRUE	FALSE
cg25302646	chr1	173475905	173475904	FALSE	TRUE	TRUE	TRUE	TRUE	FALSE
cg25340966	chr1	118989573	118989572	FALSE	TRUE	TRUE	TRUE	FALSE	FALSE
cg25730298	chr1	245418103	245418102	FALSE	TRUE	FALSE	FALSE	FALSE	FALSE
cg25746134	chr1	202160738	202160737	FALSE	TRUE	TRUE	TRUE	TRUE	FALSE
cg25758167	chr1	99849535	99849534	FALSE	TRUE	FALSE	FALSE	FALSE	FALSE
cg25771140	chr1	207321128	207321127	FALSE	TRUE	FALSE	TRUE	FALSE	FALSE
cg25862444	chr1	148264742	148264741	FALSE	TRUE	FALSE	TRUE	TRUE	FALSE
cg26015888	chr1	22025611	22025610	FALSE	TRUE	FALSE	TRUE	FALSE	FALSE
cg26018382	chr1	220810452	220810451	FALSE	TRUE	FALSE	TRUE	FALSE	FALSE
cg26020982	chr1	152223631	152223630	FALSE	TRUE	FALSE	FALSE	FALSE	FALSE
cg26030770	chr1	36446887	36446886	FALSE	TRUE	TRUE	TRUE	TRUE	FALSE
cg26038582	chr1	41918720	41918719	FALSE	TRUE	TRUE	TRUE	FALSE	FALSE
cg26058965	chr1	28233048	28233047	FALSE	TRUE	TRUE	FALSE	FALSE	FALSE
cg26135325	chr1	152622847	152622846	FALSE	TRUE	TRUE	TRUE	FALSE	FALSE
cg26227027	chr1	33379286	33379285	FALSE	TRUE	FALSE	TRUE	FALSE	FALSE
cg26297344	chr1	110608542	110608541	FALSE	TRUE	FALSE	TRUE	FALSE	FALSE
cg26320663	chr1	152189046	152189045	FALSE	TRUE	FALSE	TRUE	TRUE	FALSE
cg26339484	chr1	1000484	1000483	FALSE	TRUE	FALSE	FALSE	FALSE	FALSE
cg26345105	chr1	228446565	228446564	FALSE	TRUE	TRUE	TRUE	FALSE	FALSE
cg26419962	chr1	10449626	10449625	FALSE	TRUE	TRUE	TRUE	TRUE	FALSE
cg26466858	chr1	152623367	152623366	FALSE	TRUE	FALSE	TRUE	FALSE	FALSE
cg26548293	chr1	153633703	153633702	FALSE	TRUE	FALSE	TRUE	FALSE	FALSE
cg26570165	chr1	118999211	118999210	FALSE	TRUE	TRUE	TRUE	FALSE	FALSE
cg26570714	chr1	248592851	248592850	FALSE	TRUE	TRUE	FALSE	FALSE	FALSE
cg26605712	chr1	245371630	245371629	FALSE	TRUE	FALSE	FALSE	TRUE	FALSE
cg26664979	chr1	17699790	17699789	FALSE	TRUE	TRUE	TRUE	FALSE	FALSE
cg26669624	chr1	11701276	11701275	FALSE	TRUE	FALSE	FALSE	FALSE	FALSE
cg26764244	chr1	67833829	67833828	FALSE	TRUE	TRUE	TRUE	FALSE	FALSE
cg26815229	chr1	59927262	59927261	FALSE	TRUE	TRUE	TRUE	FALSE	FALSE
cg26816907	chr1	197921683	197921682	FALSE	TRUE	FALSE	TRUE	FALSE	FALSE
cg26835312	chr1	24186984	24186983	FALSE	TRUE	FALSE	TRUE	FALSE	FALSE
cg26855724	chr1	74733135	74733134	FALSE	TRUE	TRUE	TRUE	FALSE	FALSE
cg26870337	chr1	22451180	22451179	FALSE	TRUE	FALSE	TRUE	FALSE	FALSE
cg26873754	chr1	23867239	23867238	FALSE	TRUE	TRUE	TRUE	FALSE	FALSE
cg26875637	chr1	112395718	112395717	FALSE	TRUE	FALSE	TRUE	TRUE	FALSE
cg26882410	chr1	230715757	230715756	FALSE	TRUE	TRUE	TRUE	FALSE	FALSE
cg27167221	chr1	7043052	7043051	FALSE	TRUE	TRUE	TRUE	TRUE	FALSE
cg27175287	chr1	47417563	47417562	FALSE	TRUE	FALSE	FALSE	TRUE	FALSE
cg27238470	chr1	41484655	41484654	FALSE	TRUE	TRUE	TRUE	TRUE	FALSE
cg27291539	chr1	221169179	221169178	FALSE	TRUE	FALSE	FALSE	FALSE	FALSE
cg27295434	chr1	94544122	94544121	FALSE	TRUE	FALSE	TRUE	TRUE	FALSE
cg27310092	chr1	151973188	151973187	FALSE	TRUE	TRUE	TRUE	FALSE	FALSE
cg27549720	chr1	19665675	19665674	FALSE	TRUE	FALSE	TRUE	FALSE	FALSE
cg27594756	chr1	91404833	91404832	FALSE	TRUE	TRUE	FALSE	FALSE	FALSE
ch.1.173201084F	chr1	174965325	174965324	FALSE	TRUE	FALSE	TRUE	TRUE	FALSE
ch.1.230766435F	chr1	232564067	232564066	FALSE	TRUE	FALSE	TRUE	TRUE	FALSE
cg00006626	chr1	154154987	154154986	FALSE	FALSE	TRUE	TRUE	FALSE	FALSE
cg00019458	chr1	7827883	7827882	FALSE	FALSE	TRUE	FALSE	FALSE	FALSE
cg00042356	chr1	7961903	7961902	FALSE	FALSE	TRUE	TRUE	FALSE	FALSE
cg00121533	chr1	74733434	74733433	FALSE	FALSE	TRUE	TRUE	TRUE	FALSE
cg00242147	chr1	68231134	68231133	FALSE	FALSE	TRUE	FALSE	FALSE	FALSE
cg00305071	chr1	34038417	34038416	FALSE	FALSE	TRUE	FALSE	FALSE	FALSE
cg00308185	chr1	91949354	91949353	FALSE	FALSE	TRUE	TRUE	TRUE	FALSE
cg00358936	chr1	204196476	204196475	FALSE	FALSE	TRUE	TRUE	TRUE	FALSE
cg00464946	chr1	119652416	119652415	FALSE	FALSE	TRUE	TRUE	TRUE	FALSE
cg00489772	chr1	3858515	3858514	FALSE	FALSE	TRUE	TRUE	TRUE	FALSE
cg00504075	chr1	155857766	155857765	FALSE	FALSE	TRUE	TRUE	FALSE	FALSE
cg00578673	chr1	201226086	201226085	FALSE	FALSE	TRUE	TRUE	FALSE	FALSE
cg00657094	chr1	1238811	1238810	FALSE	FALSE	TRUE	TRUE	FALSE	FALSE
cg00805880	chr1	203075917	203075916	FALSE	FALSE	TRUE	TRUE	TRUE	FALSE
cg00816406	chr1	240123327	240123326	FALSE	FALSE	TRUE	TRUE	FALSE	FALSE
cg00946598	chr1	43651423	43651422	FALSE	FALSE	TRUE	TRUE	TRUE	FALSE
cg00949922	chr1	16187888	16187887	FALSE	FALSE	TRUE	TRUE	TRUE	FALSE
cg01014287	chr1	77979486	77979485	FALSE	FALSE	TRUE	FALSE	FALSE	FALSE
cg01077274	chr1	225677786	225677785	FALSE	FALSE	TRUE	TRUE	TRUE	FALSE
cg01102307	chr1	9280358	9280357	FALSE	FALSE	TRUE	TRUE	TRUE	FALSE
cg01206378	chr1	95233272	95233271	FALSE	FALSE	TRUE	TRUE	FALSE	FALSE
cg01243924	chr1	205069658	205069657	FALSE	FALSE	TRUE	TRUE	TRUE	FALSE
cg01431908	chr1	46203211	46203210	FALSE	FALSE	TRUE	FALSE	TRUE	FALSE
cg01602166	chr1	201887636	201887635	FALSE	FALSE	TRUE	TRUE	FALSE	FALSE
cg01646665	chr1	156281646	156281645	FALSE	FALSE	TRUE	TRUE	TRUE	FALSE
cg01785514	chr1	212815182	212815181	FALSE	FALSE	TRUE	TRUE	FALSE	FALSE
cg01905102	chr1	244652376	244652375	FALSE	FALSE	TRUE	TRUE	TRUE	FALSE
cg01967642	chr1	37763805	37763804	FALSE	FALSE	TRUE	TRUE	TRUE	FALSE
cg02394978	chr1	15247071	15247070	FALSE	FALSE	TRUE	TRUE	FALSE	FALSE
cg02481237	chr1	3154040	3154039	FALSE	FALSE	TRUE	FALSE	FALSE	FALSE
cg02482460	chr1	89198656	89198655	FALSE	FALSE	TRUE	TRUE	FALSE	FALSE
cg02709834	chr1	74733158	74733157	FALSE	FALSE	TRUE	TRUE	FALSE	FALSE
cg02855983	chr1	201283197	201283196	FALSE	FALSE	TRUE	FALSE	FALSE	FALSE
cg02900990	chr1	162021823	162021822	FALSE	FALSE	TRUE	FALSE	FALSE	FALSE
cg02934600	chr1	107057755	107057754	FALSE	FALSE	TRUE	FALSE	FALSE	FALSE
cg03373115	chr1	63593213	63593212	FALSE	FALSE	TRUE	TRUE	FALSE	FALSE
cg03458344	chr1	170995337	170995336	FALSE	FALSE	TRUE	TRUE	FALSE	FALSE
cg03722487	chr1	2483761	2483760	FALSE	FALSE	TRUE	TRUE	FALSE	FALSE
cg03837750	chr1	74198477	74198476	FALSE	FALSE	TRUE	TRUE	FALSE	FALSE
cg03916225	chr1	111226216	111226215	FALSE	FALSE	TRUE	TRUE	TRUE	FALSE
cg04851505	chr1	37318271	37318270	FALSE	FALSE	TRUE	TRUE	FALSE	FALSE
cg04945350	chr1	228417310	228417309	FALSE	FALSE	TRUE	FALSE	FALSE	FALSE
cg05049329	chr1	226737146	226737145	FALSE	FALSE	TRUE	TRUE	FALSE	FALSE
cg05052969	chr1	213983500	213983499	FALSE	FALSE	TRUE	TRUE	FALSE	FALSE
cg05230511	chr1	62131146	62131145	FALSE	FALSE	TRUE	TRUE	FALSE	FALSE
cg05304531	chr1	26471086	26471085	FALSE	FALSE	TRUE	FALSE	FALSE	FALSE
cg05772532	chr1	2493573	2493572	FALSE	FALSE	TRUE	FALSE	FALSE	FALSE
cg05951137	chr1	109640414	109640413	FALSE	FALSE	TRUE	TRUE	FALSE	FALSE
cg06269281	chr1	53889898	53889897	FALSE	FALSE	TRUE	TRUE	FALSE	FALSE
cg06363865	chr1	42464099	42464098	FALSE	FALSE	TRUE	TRUE	TRUE	FALSE
cg06367647	chr1	190477700	190477699	FALSE	FALSE	TRUE	TRUE	TRUE	FALSE
cg06439547	chr1	230643506	230643505	FALSE	FALSE	TRUE	TRUE	TRUE	FALSE
cg06660332	chr1	46544036	46544035	FALSE	FALSE	TRUE	TRUE	FALSE	FALSE
cg06710648	chr1	58250706	58250705	FALSE	FALSE	TRUE	FALSE	FALSE	FALSE
cg06763568	chr1	119742246	119742245	FALSE	FALSE	TRUE	TRUE	FALSE	FALSE
cg06786773	chr1	228379297	228379296	FALSE	FALSE	TRUE	FALSE	FALSE	FALSE
cg06786860	chr1	220703055	220703054	FALSE	FALSE	TRUE	TRUE	FALSE	FALSE
cg06874172	chr1	156931350	156931349	FALSE	FALSE	TRUE	FALSE	FALSE	FALSE
cg06949439	chr1	206555707	206555706	FALSE	FALSE	TRUE	TRUE	FALSE	FALSE
cg06961289	chr1	156752619	156752618	FALSE	FALSE	TRUE	TRUE	FALSE	FALSE
cg06972903	chr1	6520466	6520465	FALSE	FALSE	TRUE	TRUE	FALSE	FALSE
cg07090678	chr1	91500583	91500582	FALSE	FALSE	TRUE	TRUE	FALSE	FALSE
cg07179669	chr1	220881366	220881365	FALSE	FALSE	TRUE	TRUE	FALSE	FALSE
cg07572770	chr1	147242267	147242266	FALSE	FALSE	TRUE	TRUE	TRUE	FALSE
cg07604512	chr1	91499793	91499792	FALSE	FALSE	TRUE	TRUE	FALSE	FALSE
cg07706540	chr1	247210623	247210622	FALSE	FALSE	TRUE	FALSE	FALSE	FALSE
cg07736389	chr1	23424642	23424641	FALSE	FALSE	TRUE	FALSE	FALSE	FALSE
cg07803811	chr1	42958311	42958310	FALSE	FALSE	TRUE	FALSE	FALSE	FALSE
cg08129759	chr1	202122817	202122816	FALSE	FALSE	TRUE	FALSE	FALSE	FALSE
cg08264335	chr1	169712193	169712192	FALSE	FALSE	TRUE	TRUE	TRUE	FALSE
cg08708961	chr1	226882930	226882929	FALSE	FALSE	TRUE	TRUE	TRUE	FALSE
cg08868915	chr1	247934605	247934604	FALSE	FALSE	TRUE	TRUE	FALSE	FALSE
cg08885800	chr1	201114992	201114991	FALSE	FALSE	TRUE	TRUE	TRUE	FALSE
cg09149784	chr1	25797368	25797367	FALSE	FALSE	TRUE	TRUE	TRUE	FALSE
cg09173681	chr1	183580560	183580559	FALSE	FALSE	TRUE	TRUE	FALSE	FALSE
cg09175915	chr1	10623521	10623520	FALSE	FALSE	TRUE	FALSE	FALSE	FALSE
cg09232478	chr1	119006230	119006229	FALSE	FALSE	TRUE	FALSE	FALSE	FALSE
cg09250146	chr1	109249325	109249324	FALSE	FALSE	TRUE	TRUE	TRUE	FALSE
cg09277376	chr1	47434005	47434004	FALSE	FALSE	TRUE	FALSE	FALSE	FALSE
cg09502221	chr1	74732916	74732915	FALSE	FALSE	TRUE	TRUE	FALSE	FALSE
cg09557387	chr1	207645051	207645050	FALSE	FALSE	TRUE	FALSE	FALSE	FALSE
cg09649799	chr1	26336751	26336750	FALSE	FALSE	TRUE	FALSE	FALSE	FALSE
cg09696653	chr1	7705294	7705293	FALSE	FALSE	TRUE	TRUE	FALSE	FALSE
cg09789768	chr1	118981701	118981700	FALSE	FALSE	TRUE	TRUE	FALSE	FALSE
cg09820101	chr1	162822303	162822302	FALSE	FALSE	TRUE	TRUE	FALSE	FALSE
cg10052561	chr1	39671514	39671513	FALSE	FALSE	TRUE	TRUE	FALSE	FALSE
cg10096055	chr1	1919727	1919726	FALSE	FALSE	TRUE	TRUE	FALSE	FALSE
cg10112249	chr1	30058199	30058198	FALSE	FALSE	TRUE	TRUE	TRUE	FALSE
cg10128416	chr1	74732720	74732719	FALSE	FALSE	TRUE	TRUE	TRUE	FALSE
cg10202457	chr1	183418617	183418616	FALSE	FALSE	TRUE	FALSE	FALSE	FALSE
cg10204807	chr1	234214770	234214769	FALSE	FALSE	TRUE	TRUE	FALSE	FALSE
cg10380643	chr1	1421385	1421384	FALSE	FALSE	TRUE	TRUE	FALSE	FALSE
cg10433052	chr1	26469046	26469045	FALSE	FALSE	TRUE	FALSE	FALSE	FALSE
cg10493479	chr1	247672366	247672365	FALSE	FALSE	TRUE	TRUE	FALSE	FALSE
cg10533103	chr1	212515620	212515619	FALSE	FALSE	TRUE	TRUE	FALSE	FALSE
cg10574897	chr1	84691501	84691500	FALSE	FALSE	TRUE	FALSE	TRUE	FALSE
cg11189384	chr1	180235245	180235244	FALSE	FALSE	TRUE	FALSE	FALSE	FALSE
cg11256607	chr1	58250635	58250634	FALSE	FALSE	TRUE	FALSE	FALSE	FALSE
cg11396951	chr1	39026424	39026423	FALSE	FALSE	TRUE	TRUE	FALSE	FALSE
cg11847808	chr1	22563119	22563118	FALSE	FALSE	TRUE	TRUE	FALSE	FALSE
cg12077889	chr1	232568168	232568167	FALSE	FALSE	TRUE	TRUE	FALSE	FALSE
cg12211490	chr1	25501938	25501937	FALSE	FALSE	TRUE	TRUE	TRUE	FALSE
cg12303627	chr1	75083573	75083572	FALSE	FALSE	TRUE	TRUE	FALSE	FALSE
cg12406726	chr1	162822779	162822778	FALSE	FALSE	TRUE	FALSE	FALSE	FALSE
cg12479878	chr1	220881484	220881483	FALSE	FALSE	TRUE	FALSE	FALSE	FALSE
cg12658694	chr1	37931633	37931632	FALSE	FALSE	TRUE	TRUE	FALSE	FALSE
cg12696750	chr1	37556866	37556865	FALSE	FALSE	TRUE	TRUE	FALSE	FALSE
cg12738981	chr1	155858567	155858566	FALSE	FALSE	TRUE	TRUE	FALSE	FALSE
cg12905865	chr1	6485755	6485754	FALSE	FALSE	TRUE	FALSE	FALSE	FALSE
cg12936238	chr1	2323144	2323143	FALSE	FALSE	TRUE	FALSE	FALSE	FALSE
cg13053563	chr1	248405031	248405030	FALSE	FALSE	TRUE	TRUE	TRUE	FALSE
cg13095091	chr1	17623110	17623109	FALSE	FALSE	TRUE	FALSE	FALSE	FALSE
cg13421759	chr1	75786068	75786067	FALSE	FALSE	TRUE	TRUE	FALSE	FALSE
cg13488501	chr1	46339913	46339912	FALSE	FALSE	TRUE	TRUE	FALSE	FALSE
cg13560058	chr1	1161854	1161853	FALSE	FALSE	TRUE	TRUE	FALSE	FALSE
cg13573036	chr1	119009229	119009228	FALSE	FALSE	TRUE	TRUE	FALSE	FALSE
cg13690407	chr1	33007578	33007577	FALSE	FALSE	TRUE	TRUE	FALSE	FALSE
cg13843611	chr1	19816597	19816596	FALSE	FALSE	TRUE	FALSE	FALSE	FALSE
cg13863668	chr1	28670050	28670049	FALSE	FALSE	TRUE	TRUE	FALSE	FALSE
cg13922745	chr1	53078913	53078912	FALSE	FALSE	TRUE	TRUE	FALSE	FALSE
cg13933734	chr1	119007862	119007861	FALSE	FALSE	TRUE	TRUE	FALSE	FALSE
cg14204462	chr1	118997422	118997421	FALSE	FALSE	TRUE	TRUE	FALSE	FALSE
cg14375345	chr1	155230567	155230566	FALSE	FALSE	TRUE	TRUE	FALSE	FALSE
cg14413262	chr1	8323987	8323986	FALSE	FALSE	TRUE	TRUE	FALSE	FALSE
cg14563196	chr1	89198900	89198899	FALSE	FALSE	TRUE	TRUE	TRUE	FALSE
cg14565881	chr1	75724356	75724355	FALSE	FALSE	TRUE	TRUE	FALSE	FALSE
cg14656657	chr1	18960227	18960226	FALSE	FALSE	TRUE	TRUE	TRUE	FALSE
cg14851608	chr1	22450774	22450773	FALSE	FALSE	TRUE	TRUE	FALSE	FALSE
cg14977608	chr1	55040840	55040839	FALSE	FALSE	TRUE	TRUE	FALSE	FALSE
cg15031826	chr1	207963608	207963607	FALSE	FALSE	TRUE	FALSE	FALSE	FALSE
cg15103675	chr1	162561730	162561729	FALSE	FALSE	TRUE	TRUE	TRUE	FALSE
cg15119100	chr1	156705623	156705622	FALSE	FALSE	TRUE	FALSE	FALSE	FALSE
cg15129052	chr1	54951083	54951082	FALSE	FALSE	TRUE	TRUE	TRUE	FALSE
cg15211908	chr1	111988642	111988641	FALSE	FALSE	TRUE	TRUE	FALSE	FALSE
cg15322801	chr1	50106272	50106271	FALSE	FALSE	TRUE	TRUE	FALSE	FALSE
cg15628303	chr1	26282438	26282437	FALSE	FALSE	TRUE	TRUE	FALSE	FALSE
cg15696662	chr1	46203550	46203549	FALSE	FALSE	TRUE	FALSE	TRUE	FALSE
cg15903571	chr1	3560739	3560738	FALSE	FALSE	TRUE	TRUE	TRUE	FALSE
cg16011679	chr1	85259713	85259712	FALSE	FALSE	TRUE	TRUE	FALSE	FALSE
cg16016063	chr1	165617324	165617323	FALSE	FALSE	TRUE	TRUE	FALSE	FALSE
cg16114773	chr1	19882969	19882968	FALSE	FALSE	TRUE	TRUE	FALSE	FALSE
cg16417374	chr1	25771820	25771819	FALSE	FALSE	TRUE	TRUE	FALSE	FALSE
cg16585946	chr1	6771660	6771659	FALSE	FALSE	TRUE	TRUE	FALSE	FALSE
cg16639185	chr1	206612826	206612825	FALSE	FALSE	TRUE	TRUE	TRUE	FALSE
cg16680547	chr1	13701073	13701072	FALSE	FALSE	TRUE	TRUE	TRUE	FALSE
cg16686279	chr1	4027167	4027166	FALSE	FALSE	TRUE	TRUE	TRUE	FALSE
cg16717532	chr1	248099523	248099522	FALSE	FALSE	TRUE	FALSE	FALSE	FALSE
cg17273683	chr1	24595241	24595240	FALSE	FALSE	TRUE	TRUE	FALSE	FALSE
cg17405058	chr1	1301824	1301823	FALSE	FALSE	TRUE	FALSE	FALSE	FALSE
cg17444090	chr1	232599705	232599704	FALSE	FALSE	TRUE	TRUE	TRUE	FALSE
cg17479943	chr1	119004306	119004305	FALSE	FALSE	TRUE	TRUE	FALSE	FALSE
cg17489690	chr1	3219770	3219769	FALSE	FALSE	TRUE	FALSE	FALSE	FALSE
cg17492795	chr1	214464561	214464560	FALSE	FALSE	TRUE	TRUE	TRUE	FALSE
cg17815567	chr1	37037750	37037749	FALSE	FALSE	TRUE	FALSE	FALSE	FALSE
cg18116641	chr1	183420031	183420030	FALSE	FALSE	TRUE	FALSE	FALSE	FALSE
cg18273593	chr1	152211087	152211086	FALSE	FALSE	TRUE	TRUE	FALSE	FALSE
cg18275051	chr1	202967987	202967986	FALSE	FALSE	TRUE	TRUE	FALSE	FALSE
cg18303360	chr1	26046798	26046797	FALSE	FALSE	TRUE	TRUE	FALSE	FALSE
cg18564849	chr1	230822996	230822995	FALSE	FALSE	TRUE	TRUE	FALSE	FALSE
cg18761813	chr1	181675407	181675406	FALSE	FALSE	TRUE	FALSE	FALSE	FALSE
cg18864179	chr1	175221819	175221818	FALSE	FALSE	TRUE	FALSE	FALSE	FALSE
cg18866281	chr1	246785296	246785295	FALSE	FALSE	TRUE	TRUE	TRUE	FALSE
cg18882407	chr1	241998505	241998504	FALSE	FALSE	TRUE	FALSE	TRUE	FALSE
cg18889144	chr1	45679396	45679395	FALSE	FALSE	TRUE	TRUE	FALSE	FALSE
cg18941796	chr1	17437680	17437679	FALSE	FALSE	TRUE	FALSE	FALSE	FALSE
cg19096424	chr1	119712482	119712481	FALSE	FALSE	TRUE	TRUE	FALSE	FALSE
cg19243717	chr1	8302596	8302595	FALSE	FALSE	TRUE	FALSE	FALSE	FALSE
cg19249107	chr1	55040282	55040281	FALSE	FALSE	TRUE	TRUE	FALSE	FALSE
cg19583968	chr1	54980715	54980714	FALSE	FALSE	TRUE	TRUE	FALSE	FALSE
cg19638572	chr1	206559812	206559811	FALSE	FALSE	TRUE	TRUE	FALSE	FALSE
cg20254763	chr1	175153695	175153694	FALSE	FALSE	TRUE	TRUE	FALSE	FALSE
cg20301308	chr1	65069060	65069059	FALSE	FALSE	TRUE	TRUE	TRUE	FALSE
cg20433858	chr1	247937708	247937707	FALSE	FALSE	TRUE	TRUE	FALSE	FALSE
cg20518750	chr1	246932182	246932181	FALSE	FALSE	TRUE	FALSE	FALSE	FALSE
cg20747739	chr1	1247878	1247877	FALSE	FALSE	TRUE	TRUE	FALSE	FALSE
cg20817062	chr1	94819794	94819793	FALSE	FALSE	TRUE	TRUE	FALSE	FALSE
cg21211271	chr1	6205012	6205011	FALSE	FALSE	TRUE	FALSE	TRUE	FALSE
cg21280320	chr1	152189550	152189549	FALSE	FALSE	TRUE	TRUE	FALSE	FALSE
cg21415347	chr1	22451347	22451346	FALSE	FALSE	TRUE	TRUE	FALSE	FALSE
cg21535942	chr1	74733417	74733416	FALSE	FALSE	TRUE	TRUE	TRUE	FALSE
cg21578869	chr1	33376331	33376330	FALSE	FALSE	TRUE	FALSE	TRUE	FALSE
cg21660130	chr1	16043749	16043748	FALSE	FALSE	TRUE	TRUE	FALSE	FALSE
cg21681549	chr1	61077018	61077017	FALSE	FALSE	TRUE	FALSE	FALSE	FALSE
cg21686600	chr1	24393220	24393219	FALSE	FALSE	TRUE	TRUE	TRUE	FALSE
cg21779088	chr1	1065477	1065476	FALSE	FALSE	TRUE	TRUE	FALSE	FALSE
cg21786334	chr1	156295640	156295639	FALSE	FALSE	TRUE	FALSE	FALSE	FALSE
cg21813377	chr1	4132758	4132757	FALSE	FALSE	TRUE	TRUE	FALSE	FALSE
cg21853568	chr1	16082408	16082407	FALSE	FALSE	TRUE	TRUE	FALSE	FALSE
cg21871952	chr1	111271525	111271524	FALSE	FALSE	TRUE	TRUE	FALSE	FALSE
cg22153407	chr1	230154343	230154342	FALSE	FALSE	TRUE	TRUE	FALSE	FALSE
cg22176994	chr1	153633865	153633864	FALSE	FALSE	TRUE	TRUE	FALSE	FALSE
cg22221025	chr1	109643423	109643422	FALSE	FALSE	TRUE	TRUE	FALSE	FALSE
cg22339091	chr1	27935180	27935179	FALSE	FALSE	TRUE	TRUE	TRUE	FALSE
cg22378919	chr1	118979566	118979565	FALSE	FALSE	TRUE	FALSE	FALSE	FALSE
cg22430231	chr1	230425455	230425454	FALSE	FALSE	TRUE	FALSE	FALSE	FALSE
cg22488158	chr1	85062362	85062361	FALSE	FALSE	TRUE	TRUE	FALSE	FALSE
cg22519756	chr1	84574572	84574571	FALSE	FALSE	TRUE	TRUE	FALSE	FALSE
cg22608619	chr1	10643175	10643174	FALSE	FALSE	TRUE	TRUE	FALSE	FALSE
cg22709362	chr1	44327909	44327908	FALSE	FALSE	TRUE	TRUE	FALSE	FALSE
cg22861340	chr1	28775338	28775337	FALSE	FALSE	TRUE	TRUE	FALSE	FALSE
cg23055938	chr1	161021402	161021401	FALSE	FALSE	TRUE	TRUE	FALSE	FALSE
cg23217983	chr1	66553143	66553142	FALSE	FALSE	TRUE	TRUE	TRUE	FALSE
cg23254163	chr1	152534367	152534366	FALSE	FALSE	TRUE	TRUE	TRUE	FALSE
cg23255020	chr1	246776106	246776105	FALSE	FALSE	TRUE	TRUE	FALSE	FALSE
cg23272399	chr1	52602908	52602907	FALSE	FALSE	TRUE	TRUE	FALSE	FALSE
cg23277061	chr1	33268788	33268787	FALSE	FALSE	TRUE	FALSE	FALSE	FALSE
cg23279117	chr1	111270888	111270887	FALSE	FALSE	TRUE	TRUE	FALSE	FALSE
cg23594461	chr1	201119410	201119409	FALSE	FALSE	TRUE	FALSE	TRUE	FALSE
cg23656015	chr1	4965115	4965114	FALSE	FALSE	TRUE	TRUE	FALSE	FALSE
cg23659062	chr1	167119422	167119421	FALSE	FALSE	TRUE	TRUE	TRUE	FALSE
cg23660154	chr1	110083919	110083918	FALSE	FALSE	TRUE	TRUE	TRUE	FALSE
cg23864823	chr1	151763780	151763779	FALSE	FALSE	TRUE	TRUE	FALSE	FALSE
cg23978657	chr1	89198578	89198577	FALSE	FALSE	TRUE	TRUE	TRUE	FALSE
cg24307341	chr1	21577992	21577991	FALSE	FALSE	TRUE	TRUE	TRUE	FALSE
cg24351410	chr1	58250362	58250361	FALSE	FALSE	TRUE	TRUE	FALSE	FALSE
cg24410255	chr1	217925252	217925251	FALSE	FALSE	TRUE	TRUE	FALSE	FALSE
cg24453604	chr1	8302354	8302353	FALSE	FALSE	TRUE	FALSE	FALSE	FALSE
cg24464789	chr1	43285827	43285826	FALSE	FALSE	TRUE	FALSE	FALSE	FALSE
cg24544113	chr1	156193897	156193896	FALSE	FALSE	TRUE	FALSE	FALSE	FALSE
cg24643429	chr1	3645866	3645865	FALSE	FALSE	TRUE	TRUE	FALSE	FALSE
cg24834590	chr1	22448028	22448027	FALSE	FALSE	TRUE	FALSE	FALSE	FALSE
cg24848599	chr1	228417100	228417099	FALSE	FALSE	TRUE	TRUE	FALSE	FALSE
cg24940889	chr1	71464294	71464293	FALSE	FALSE	TRUE	TRUE	FALSE	FALSE
cg25007680	chr1	7961762	7961761	FALSE	FALSE	TRUE	TRUE	FALSE	FALSE
cg25013184	chr1	10427897	10427896	FALSE	FALSE	TRUE	TRUE	TRUE	FALSE
cg25076881	chr1	159440047	159440046	FALSE	FALSE	TRUE	TRUE	FALSE	FALSE
cg25216580	chr1	119631367	119631366	FALSE	FALSE	TRUE	TRUE	FALSE	FALSE
cg25369168	chr1	179815361	179815360	FALSE	FALSE	TRUE	FALSE	TRUE	FALSE
cg25384333	chr1	178724461	178724460	FALSE	FALSE	TRUE	FALSE	FALSE	FALSE
cg25464921	chr1	169460461	169460460	FALSE	FALSE	TRUE	FALSE	FALSE	FALSE
cg26010182	chr1	147241844	147241843	FALSE	FALSE	TRUE	FALSE	FALSE	FALSE
cg26050864	chr1	209676101	209676100	FALSE	FALSE	TRUE	TRUE	FALSE	FALSE
cg26156167	chr1	161612862	161612861	FALSE	FALSE	TRUE	TRUE	FALSE	FALSE
cg26362272	chr1	21782225	21782224	FALSE	FALSE	TRUE	TRUE	FALSE	FALSE
cg26440142	chr1	220884232	220884231	FALSE	FALSE	TRUE	TRUE	FALSE	FALSE
cg26513689	chr1	58251961	58251960	FALSE	FALSE	TRUE	FALSE	TRUE	FALSE
cg26518660	chr1	79262924	79262923	FALSE	FALSE	TRUE	TRUE	FALSE	FALSE
cg26547924	chr1	215083528	215083527	FALSE	FALSE	TRUE	TRUE	FALSE	FALSE
cg26566407	chr1	2271493	2271492	FALSE	FALSE	TRUE	TRUE	FALSE	FALSE
cg26608693	chr1	13701087	13701086	FALSE	FALSE	TRUE	TRUE	FALSE	FALSE
cg26667735	chr1	46397438	46397437	FALSE	FALSE	TRUE	FALSE	FALSE	FALSE
cg26690034	chr1	74733280	74733279	FALSE	FALSE	TRUE	TRUE	FALSE	FALSE
cg26752657	chr1	74733392	74733391	FALSE	FALSE	TRUE	TRUE	TRUE	FALSE
cg26886909	chr1	111317130	111317129	FALSE	FALSE	TRUE	FALSE	FALSE	FALSE
cg26910870	chr1	2115490	2115489	FALSE	FALSE	TRUE	FALSE	FALSE	FALSE
cg27300647	chr1	62194610	62194609	FALSE	FALSE	TRUE	TRUE	FALSE	FALSE
cg27363486	chr1	228415945	228415944	FALSE	FALSE	TRUE	FALSE	FALSE	FALSE
cg27517652	chr1	179081539	179081538	FALSE	FALSE	TRUE	TRUE	FALSE	FALSE
cg27519958	chr1	161765340	161765339	FALSE	FALSE	TRUE	TRUE	FALSE	FALSE
cg27584146	chr1	46134244	46134243	FALSE	FALSE	TRUE	FALSE	FALSE	FALSE
cg27590049	chr1	165235963	165235962	FALSE	FALSE	TRUE	FALSE	FALSE	FALSE
ch.1.3947147F	chr1	203724636	203724635	FALSE	FALSE	TRUE	TRUE	TRUE	FALSE
cg00044354	chr1	66924202	66924201	FALSE	FALSE	FALSE	TRUE	FALSE	FALSE
cg00069002	chr1	33307136	33307135	FALSE	FALSE	FALSE	TRUE	FALSE	FALSE
cg00085493	chr1	207866859	207866858	FALSE	FALSE	FALSE	TRUE	FALSE	FALSE
cg00086243	chr1	1207026	1207025	FALSE	FALSE	FALSE	TRUE	TRUE	FALSE
cg00099768	chr1	175193001	175193000	FALSE	FALSE	FALSE	TRUE	FALSE	FALSE
cg00107970	chr1	156149667	156149666	FALSE	FALSE	FALSE	TRUE	FALSE	FALSE
cg00165862	chr1	204213933	204213932	FALSE	FALSE	FALSE	TRUE	FALSE	FALSE
cg00188746	chr1	15153763	15153762	FALSE	FALSE	FALSE	TRUE	FALSE	FALSE
cg00257659	chr1	209626870	209626869	FALSE	FALSE	FALSE	TRUE	FALSE	FALSE
cg00279406	chr1	226737039	226737038	FALSE	FALSE	FALSE	TRUE	FALSE	FALSE
cg00297432	chr1	6424725	6424724	FALSE	FALSE	FALSE	TRUE	FALSE	FALSE
cg00505133	chr1	94854904	94854903	FALSE	FALSE	FALSE	TRUE	FALSE	FALSE
cg00538247	chr1	7053330	7053329	FALSE	FALSE	FALSE	TRUE	TRUE	FALSE
cg00582671	chr1	936856	936855	FALSE	FALSE	FALSE	TRUE	FALSE	FALSE
cg00620223	chr1	214603562	214603561	FALSE	FALSE	FALSE	TRUE	FALSE	FALSE
cg00658007	chr1	211492788	211492787	FALSE	FALSE	FALSE	TRUE	FALSE	FALSE
cg00791468	chr1	110606363	110606362	FALSE	FALSE	FALSE	TRUE	TRUE	FALSE
cg00851154	chr1	26364088	26364087	FALSE	FALSE	FALSE	TRUE	TRUE	FALSE
cg00883837	chr1	248387873	248387872	FALSE	FALSE	FALSE	TRUE	TRUE	FALSE
cg00891176	chr1	201113604	201113603	FALSE	FALSE	FALSE	TRUE	FALSE	FALSE
cg00907549	chr1	236605067	236605066	FALSE	FALSE	FALSE	TRUE	FALSE	FALSE
cg00924017	chr1	109643406	109643405	FALSE	FALSE	FALSE	TRUE	FALSE	FALSE
cg00950809	chr1	46617180	46617179	FALSE	FALSE	FALSE	TRUE	FALSE	FALSE
cg00955674	chr1	1543448	1543447	FALSE	FALSE	FALSE	TRUE	FALSE	FALSE
cg01063935	chr1	10556029	10556028	FALSE	FALSE	FALSE	TRUE	FALSE	FALSE
cg01072498	chr1	214753604	214753603	FALSE	FALSE	FALSE	TRUE	FALSE	FALSE
cg01115565	chr1	29257711	29257710	FALSE	FALSE	FALSE	TRUE	FALSE	FALSE
cg01119512	chr1	24319716	24319715	FALSE	FALSE	FALSE	TRUE	FALSE	FALSE
cg01242872	chr1	2855563	2855562	FALSE	FALSE	FALSE	TRUE	TRUE	FALSE
cg01421119	chr1	211382392	211382391	FALSE	FALSE	FALSE	TRUE	TRUE	FALSE
cg01439649	chr1	23084216	23084215	FALSE	FALSE	FALSE	TRUE	FALSE	FALSE
cg01444643	chr1	55039176	55039175	FALSE	FALSE	FALSE	TRUE	FALSE	FALSE
cg01575408	chr1	211579554	211579553	FALSE	FALSE	FALSE	TRUE	FALSE	FALSE
cg01757525	chr1	40477715	40477714	FALSE	FALSE	FALSE	TRUE	FALSE	FALSE
cg01798266	chr1	153347939	153347938	FALSE	FALSE	FALSE	TRUE	TRUE	FALSE
cg01808492	chr1	175192652	175192651	FALSE	FALSE	FALSE	TRUE	FALSE	FALSE
cg01824919	chr1	116168719	116168718	FALSE	FALSE	FALSE	TRUE	TRUE	FALSE
cg01834541	chr1	10591745	10591744	FALSE	FALSE	FALSE	TRUE	FALSE	FALSE
cg01960096	chr1	157043175	157043174	FALSE	FALSE	FALSE	TRUE	FALSE	FALSE
cg01990334	chr1	42335664	42335663	FALSE	FALSE	FALSE	TRUE	FALSE	FALSE
cg02077084	chr1	248386641	248386640	FALSE	FALSE	FALSE	TRUE	FALSE	FALSE
cg02152128	chr1	248834681	248834680	FALSE	FALSE	FALSE	TRUE	TRUE	FALSE
cg02157078	chr1	114346148	114346147	FALSE	FALSE	FALSE	TRUE	FALSE	FALSE
cg02161115	chr1	75796689	75796688	FALSE	FALSE	FALSE	TRUE	FALSE	FALSE
cg02267408	chr1	47449198	47449197	FALSE	FALSE	FALSE	TRUE	FALSE	FALSE
cg02279987	chr1	1246378	1246377	FALSE	FALSE	FALSE	TRUE	FALSE	FALSE
cg02397727	chr1	26045810	26045809	FALSE	FALSE	FALSE	TRUE	FALSE	FALSE
cg02449975	chr1	165602044	165602043	FALSE	FALSE	FALSE	TRUE	FALSE	FALSE
cg02455346	chr1	220882060	220882059	FALSE	FALSE	FALSE	TRUE	FALSE	FALSE
cg02457750	chr1	200042146	200042145	FALSE	FALSE	FALSE	TRUE	FALSE	FALSE
cg02493846	chr1	151837059	151837058	FALSE	FALSE	FALSE	TRUE	FALSE	FALSE
cg02531516	chr1	83860942	83860941	FALSE	FALSE	FALSE	TRUE	TRUE	FALSE
cg02855836	chr1	116167910	116167909	FALSE	FALSE	FALSE	TRUE	TRUE	FALSE
cg02892772	chr1	44525371	44525370	FALSE	FALSE	FALSE	TRUE	FALSE	FALSE
cg02900760	chr1	212087956	212087955	FALSE	FALSE	FALSE	TRUE	FALSE	FALSE
cg02985240	chr1	235304834	235304833	FALSE	FALSE	FALSE	TRUE	TRUE	FALSE
cg02991924	chr1	228005537	228005536	FALSE	FALSE	FALSE	TRUE	FALSE	FALSE
cg03039243	chr1	2866135	2866134	FALSE	FALSE	FALSE	TRUE	TRUE	FALSE
cg03044096	chr1	44675198	44675197	FALSE	FALSE	FALSE	TRUE	FALSE	FALSE
cg03070194	chr1	109668063	109668062	FALSE	FALSE	FALSE	TRUE	FALSE	FALSE
cg03278726	chr1	1174453	1174452	FALSE	FALSE	FALSE	TRUE	TRUE	FALSE
cg03307360	chr1	226870726	226870725	FALSE	FALSE	FALSE	TRUE	FALSE	FALSE
cg03341469	chr1	53890234	53890233	FALSE	FALSE	FALSE	TRUE	FALSE	FALSE
cg03351412	chr1	154936776	154936775	FALSE	FALSE	FALSE	TRUE	FALSE	FALSE
cg03394722	chr1	984537	984536	FALSE	FALSE	FALSE	TRUE	FALSE	FALSE
cg03580279	chr1	2084536	2084535	FALSE	FALSE	FALSE	TRUE	TRUE	FALSE
cg03681926	chr1	83860503	83860502	FALSE	FALSE	FALSE	TRUE	FALSE	FALSE
cg03760839	chr1	118989096	118989095	FALSE	FALSE	FALSE	TRUE	FALSE	FALSE
cg03890680	chr1	227317021	227317020	FALSE	FALSE	FALSE	TRUE	FALSE	FALSE
cg03951833	chr1	148328979	148328978	FALSE	FALSE	FALSE	TRUE	FALSE	FALSE
cg03991309	chr1	67772079	67772078	FALSE	FALSE	FALSE	TRUE	FALSE	FALSE
cg04021497	chr1	23980802	23980801	FALSE	FALSE	FALSE	TRUE	FALSE	FALSE
cg04055049	chr1	6261494	6261493	FALSE	FALSE	FALSE	TRUE	FALSE	FALSE
cg04095045	chr1	24555709	24555708	FALSE	FALSE	FALSE	TRUE	FALSE	FALSE
cg04118124	chr1	42765579	42765578	FALSE	FALSE	FALSE	TRUE	TRUE	FALSE
cg04232325	chr1	223364022	223364021	FALSE	FALSE	FALSE	TRUE	FALSE	FALSE
cg04289208	chr1	202210554	202210553	FALSE	FALSE	FALSE	TRUE	FALSE	FALSE
cg04290779	chr1	41496397	41496396	FALSE	FALSE	FALSE	TRUE	FALSE	FALSE
cg04349178	chr1	2094786	2094785	FALSE	FALSE	FALSE	TRUE	FALSE	FALSE
cg04360793	chr1	79006677	79006676	FALSE	FALSE	FALSE	TRUE	FALSE	FALSE
cg04392488	chr1	3727663	3727662	FALSE	FALSE	FALSE	TRUE	FALSE	FALSE
cg04398759	chr1	203131939	203131938	FALSE	FALSE	FALSE	TRUE	FALSE	FALSE
cg04436994	chr1	220882324	220882323	FALSE	FALSE	FALSE	TRUE	FALSE	FALSE
cg04491808	chr1	94119897	94119896	FALSE	FALSE	FALSE	TRUE	FALSE	FALSE
cg04510788	chr1	37033300	37033299	FALSE	FALSE	FALSE	TRUE	FALSE	FALSE
cg04539515	chr1	220895453	220895452	FALSE	FALSE	FALSE	TRUE	TRUE	FALSE
cg04607844	chr1	212916862	212916861	FALSE	FALSE	FALSE	TRUE	FALSE	FALSE
cg04622024	chr1	37735330	37735329	FALSE	FALSE	FALSE	TRUE	FALSE	FALSE
cg04879861	chr1	46668640	46668639	FALSE	FALSE	FALSE	TRUE	FALSE	FALSE
cg04914562	chr1	61741788	61741787	FALSE	FALSE	FALSE	TRUE	FALSE	FALSE
cg04919596	chr1	1060675	1060674	FALSE	FALSE	FALSE	TRUE	FALSE	FALSE
cg04923746	chr1	211492963	211492962	FALSE	FALSE	FALSE	TRUE	FALSE	FALSE
cg04944659	chr1	10831475	10831474	FALSE	FALSE	FALSE	TRUE	TRUE	FALSE
cg04975598	chr1	160070120	160070119	FALSE	FALSE	FALSE	TRUE	FALSE	FALSE
cg04975920	chr1	46180553	46180552	FALSE	FALSE	FALSE	TRUE	FALSE	FALSE
cg04980428	chr1	25771724	25771723	FALSE	FALSE	FALSE	TRUE	FALSE	FALSE
cg05036103	chr1	92950354	92950353	FALSE	FALSE	FALSE	TRUE	FALSE	FALSE
cg05048624	chr1	20115087	20115086	FALSE	FALSE	FALSE	TRUE	TRUE	FALSE
cg05118916	chr1	55039391	55039390	FALSE	FALSE	FALSE	TRUE	FALSE	FALSE
cg05136737	chr1	244761617	244761616	FALSE	FALSE	FALSE	TRUE	TRUE	FALSE
cg05139571	chr1	154154663	154154662	FALSE	FALSE	FALSE	TRUE	FALSE	FALSE
cg05302064	chr1	5862627	5862626	FALSE	FALSE	FALSE	TRUE	FALSE	FALSE
cg05309877	chr1	58545933	58545932	FALSE	FALSE	FALSE	TRUE	FALSE	FALSE
cg05364829	chr1	21345418	21345417	FALSE	FALSE	FALSE	TRUE	FALSE	FALSE
cg05376185	chr1	46617198	46617197	FALSE	FALSE	FALSE	TRUE	FALSE	FALSE
cg05382282	chr1	6104676	6104675	FALSE	FALSE	FALSE	TRUE	FALSE	FALSE
cg05393023	chr1	168225589	168225588	FALSE	FALSE	FALSE	TRUE	FALSE	FALSE
cg05394663	chr1	228061085	228061084	FALSE	FALSE	FALSE	TRUE	FALSE	FALSE
cg05576974	chr1	193059009	193059008	FALSE	FALSE	FALSE	TRUE	FALSE	FALSE
cg05606799	chr1	204196180	204196179	FALSE	FALSE	FALSE	TRUE	FALSE	FALSE
cg05674944	chr1	26045800	26045799	FALSE	FALSE	FALSE	TRUE	FALSE	FALSE
cg05796704	chr1	11654162	11654161	FALSE	FALSE	FALSE	TRUE	FALSE	FALSE
cg05802658	chr1	11908533	11908532	FALSE	FALSE	FALSE	TRUE	TRUE	FALSE
cg05822335	chr1	171210737	171210736	FALSE	FALSE	FALSE	TRUE	FALSE	FALSE
cg05869122	chr1	226739268	226739267	FALSE	FALSE	FALSE	TRUE	FALSE	FALSE
cg05874270	chr1	2628455	2628454	FALSE	FALSE	FALSE	TRUE	FALSE	FALSE
cg05919360	chr1	57423746	57423745	FALSE	FALSE	FALSE	TRUE	FALSE	FALSE
cg05965334	chr1	46617096	46617095	FALSE	FALSE	FALSE	TRUE	FALSE	FALSE
cg05996213	chr1	175743417	175743416	FALSE	FALSE	FALSE	TRUE	TRUE	FALSE
cg06058681	chr1	38292142	38292141	FALSE	FALSE	FALSE	TRUE	TRUE	FALSE
cg06087623	chr1	2271574	2271573	FALSE	FALSE	FALSE	TRUE	FALSE	FALSE
cg06155620	chr1	209354237	209354236	FALSE	FALSE	FALSE	TRUE	FALSE	FALSE
cg06165395	chr1	37035190	37035189	FALSE	FALSE	FALSE	TRUE	FALSE	FALSE
cg06207804	chr1	43933327	43933326	FALSE	FALSE	FALSE	TRUE	FALSE	FALSE
cg06208288	chr1	58392403	58392402	FALSE	FALSE	FALSE	TRUE	TRUE	FALSE
cg06215416	chr1	2452035	2452034	FALSE	FALSE	FALSE	TRUE	FALSE	FALSE
cg06440960	chr1	155859136	155859135	FALSE	FALSE	FALSE	TRUE	FALSE	FALSE
cg06620092	chr1	114154902	114154901	FALSE	FALSE	FALSE	TRUE	FALSE	FALSE
cg06621080	chr1	201662039	201662038	FALSE	FALSE	FALSE	TRUE	FALSE	FALSE
cg06642677	chr1	203860648	203860647	FALSE	FALSE	FALSE	TRUE	FALSE	FALSE
cg06665322	chr1	167090129	167090128	FALSE	FALSE	FALSE	TRUE	FALSE	FALSE
cg06753273	chr1	211493088	211493087	FALSE	FALSE	FALSE	TRUE	FALSE	FALSE
cg06764239	chr1	119002150	119002149	FALSE	FALSE	FALSE	TRUE	TRUE	FALSE
cg06770735	chr1	11779975	11779974	FALSE	FALSE	FALSE	TRUE	TRUE	FALSE
cg06824523	chr1	2480174	2480173	FALSE	FALSE	FALSE	TRUE	FALSE	FALSE
cg06840154	chr1	25823264	25823263	FALSE	FALSE	FALSE	TRUE	FALSE	FALSE
cg06846214	chr1	248386371	248386370	FALSE	FALSE	FALSE	TRUE	FALSE	FALSE
cg06884882	chr1	44722275	44722274	FALSE	FALSE	FALSE	TRUE	FALSE	FALSE
cg06929287	chr1	209827848	209827847	FALSE	FALSE	FALSE	TRUE	FALSE	FALSE
cg06937997	chr1	71046418	71046417	FALSE	FALSE	FALSE	TRUE	FALSE	FALSE
cg06939851	chr1	225924835	225924834	FALSE	FALSE	FALSE	TRUE	FALSE	FALSE
cg06957790	chr1	155935057	155935056	FALSE	FALSE	FALSE	TRUE	TRUE	FALSE
cg06974930	chr1	46167482	46167481	FALSE	FALSE	FALSE	TRUE	FALSE	FALSE
cg07005055	chr1	112509546	112509545	FALSE	FALSE	FALSE	TRUE	FALSE	FALSE
cg07011373	chr1	204213970	204213969	FALSE	FALSE	FALSE	TRUE	FALSE	FALSE
cg07026666	chr1	204081253	204081252	FALSE	FALSE	FALSE	TRUE	FALSE	FALSE
cg07170222	chr1	211675911	211675910	FALSE	FALSE	FALSE	TRUE	FALSE	FALSE
cg07180649	chr1	22143798	22143797	FALSE	FALSE	FALSE	TRUE	FALSE	FALSE
cg07185695	chr1	220786245	220786244	FALSE	FALSE	FALSE	TRUE	FALSE	FALSE
cg07191012	chr1	32716772	32716771	FALSE	FALSE	FALSE	TRUE	FALSE	FALSE
cg07230639	chr1	2855799	2855798	FALSE	FALSE	FALSE	TRUE	FALSE	FALSE
cg07347511	chr1	46617160	46617159	FALSE	FALSE	FALSE	TRUE	FALSE	FALSE
cg07355757	chr1	221478406	221478405	FALSE	FALSE	FALSE	TRUE	TRUE	FALSE
cg07381283	chr1	2460399	2460398	FALSE	FALSE	FALSE	TRUE	FALSE	FALSE
cg07384165	chr1	10428225	10428224	FALSE	FALSE	FALSE	TRUE	FALSE	FALSE
cg07385423	chr1	161727785	161727784	FALSE	FALSE	FALSE	TRUE	FALSE	FALSE
cg07580762	chr1	161202021	161202020	FALSE	FALSE	FALSE	TRUE	FALSE	FALSE
cg07584855	chr1	220882204	220882203	FALSE	FALSE	FALSE	TRUE	FALSE	FALSE
cg07804749	chr1	12550075	12550074	FALSE	FALSE	FALSE	TRUE	TRUE	FALSE
cg07807165	chr1	83860928	83860927	FALSE	FALSE	FALSE	TRUE	FALSE	FALSE
cg07903237	chr1	220891047	220891046	FALSE	FALSE	FALSE	TRUE	TRUE	FALSE
cg07906432	chr1	63987369	63987368	FALSE	FALSE	FALSE	TRUE	FALSE	FALSE
cg07925738	chr1	16521345	16521344	FALSE	FALSE	FALSE	TRUE	FALSE	FALSE
cg08039751	chr1	2493218	2493217	FALSE	FALSE	FALSE	TRUE	FALSE	FALSE
cg08106066	chr1	54475498	54475497	FALSE	FALSE	FALSE	TRUE	FALSE	FALSE
cg08134680	chr1	37756640	37756639	FALSE	FALSE	FALSE	TRUE	TRUE	FALSE
cg08164484	chr1	58248270	58248269	FALSE	FALSE	FALSE	TRUE	FALSE	FALSE
cg08366446	chr1	28812425	28812424	FALSE	FALSE	FALSE	TRUE	FALSE	FALSE
cg08380539	chr1	84574020	84574019	FALSE	FALSE	FALSE	TRUE	TRUE	FALSE
cg08452766	chr1	36323896	36323895	FALSE	FALSE	FALSE	TRUE	TRUE	FALSE
cg08533162	chr1	44239746	44239745	FALSE	FALSE	FALSE	TRUE	TRUE	FALSE
cg08540100	chr1	23562497	23562496	FALSE	FALSE	FALSE	TRUE	FALSE	FALSE
cg08655206	chr1	220884857	220884856	FALSE	FALSE	FALSE	TRUE	FALSE	FALSE
cg08655788	chr1	89762804	89762803	FALSE	FALSE	FALSE	TRUE	FALSE	FALSE
cg08700651	chr1	24186993	24186992	FALSE	FALSE	FALSE	TRUE	FALSE	FALSE
cg08707192	chr1	40161275	40161274	FALSE	FALSE	FALSE	TRUE	FALSE	FALSE
cg08729059	chr1	26169384	26169383	FALSE	FALSE	FALSE	TRUE	FALSE	FALSE
cg08737543	chr1	10058709	10058708	FALSE	FALSE	FALSE	TRUE	TRUE	FALSE
cg08850169	chr1	161201680	161201679	FALSE	FALSE	FALSE	TRUE	FALSE	FALSE
cg08876103	chr1	39106652	39106651	FALSE	FALSE	FALSE	TRUE	FALSE	FALSE
cg08920610	chr1	55039671	55039670	FALSE	FALSE	FALSE	TRUE	FALSE	FALSE
cg08940984	chr1	202888486	202888485	FALSE	FALSE	FALSE	TRUE	FALSE	FALSE
cg09062462	chr1	84754560	84754559	FALSE	FALSE	FALSE	TRUE	FALSE	FALSE
cg09071280	chr1	39076281	39076280	FALSE	FALSE	FALSE	TRUE	FALSE	FALSE
cg09081913	chr1	180230240	180230239	FALSE	FALSE	FALSE	TRUE	FALSE	FALSE
cg09122657	chr1	9234855	9234854	FALSE	FALSE	FALSE	TRUE	FALSE	FALSE
cg09142399	chr1	74734411	74734410	FALSE	FALSE	FALSE	TRUE	FALSE	FALSE
cg09232269	chr1	207673464	207673463	FALSE	FALSE	FALSE	TRUE	FALSE	FALSE
cg09255910	chr1	220882449	220882448	FALSE	FALSE	FALSE	TRUE	FALSE	FALSE
cg09269935	chr1	4481496	4481495	FALSE	FALSE	FALSE	TRUE	FALSE	FALSE
cg09368188	chr1	245166717	245166716	FALSE	FALSE	FALSE	TRUE	FALSE	FALSE
cg09368875	chr1	110406942	110406941	FALSE	FALSE	FALSE	TRUE	FALSE	FALSE
cg09505809	chr1	180154088	180154087	FALSE	FALSE	FALSE	TRUE	FALSE	FALSE
cg09666230	chr1	209675058	209675057	FALSE	FALSE	FALSE	TRUE	FALSE	FALSE
cg09683824	chr1	179743057	179743056	FALSE	FALSE	FALSE	TRUE	FALSE	FALSE
cg09797390	chr1	111720474	111720473	FALSE	FALSE	FALSE	TRUE	FALSE	FALSE
cg09826056	chr1	78045677	78045676	FALSE	FALSE	FALSE	TRUE	FALSE	FALSE
cg09854709	chr1	156933306	156933305	FALSE	FALSE	FALSE	TRUE	TRUE	FALSE
cg09858604	chr1	156924440	156924439	FALSE	FALSE	FALSE	TRUE	FALSE	FALSE
cg09873164	chr1	152515618	152515617	FALSE	FALSE	FALSE	TRUE	TRUE	FALSE
cg09874213	chr1	24641862	24641861	FALSE	FALSE	FALSE	TRUE	TRUE	FALSE
cg10106804	chr1	34792994	34792993	FALSE	FALSE	FALSE	TRUE	FALSE	FALSE
cg10233913	chr1	17119668	17119667	FALSE	FALSE	FALSE	TRUE	FALSE	FALSE
cg10386298	chr1	220877150	220877149	FALSE	FALSE	FALSE	TRUE	FALSE	FALSE
cg10495572	chr1	66445511	66445510	FALSE	FALSE	FALSE	TRUE	FALSE	FALSE
cg10522447	chr1	24744770	24744769	FALSE	FALSE	FALSE	TRUE	FALSE	FALSE
cg10554624	chr1	52920947	52920946	FALSE	FALSE	FALSE	TRUE	FALSE	FALSE
cg10580513	chr1	247947982	247947981	FALSE	FALSE	FALSE	TRUE	FALSE	FALSE
cg10768996	chr1	205266875	205266874	FALSE	FALSE	FALSE	TRUE	FALSE	FALSE
cg10810183	chr1	162024198	162024197	FALSE	FALSE	FALSE	TRUE	FALSE	FALSE
cg10812027	chr1	2922683	2922682	FALSE	FALSE	FALSE	TRUE	FALSE	FALSE
cg10952190	chr1	214552531	214552530	FALSE	FALSE	FALSE	TRUE	FALSE	FALSE
cg11003133	chr1	159076602	159076601	FALSE	FALSE	FALSE	TRUE	FALSE	FALSE
cg11019172	chr1	6236662	6236661	FALSE	FALSE	FALSE	TRUE	TRUE	FALSE
cg11157816	chr1	113979564	113979563	FALSE	FALSE	FALSE	TRUE	FALSE	FALSE
cg11216917	chr1	204075382	204075381	FALSE	FALSE	FALSE	TRUE	FALSE	FALSE
cg11224984	chr1	2271607	2271606	FALSE	FALSE	FALSE	TRUE	TRUE	FALSE
cg11226328	chr1	28886856	28886855	FALSE	FALSE	FALSE	TRUE	FALSE	FALSE
cg11377642	chr1	245371588	245371587	FALSE	FALSE	FALSE	TRUE	TRUE	FALSE
cg11388664	chr1	159170583	159170582	FALSE	FALSE	FALSE	TRUE	FALSE	FALSE
cg11391335	chr1	118979306	118979305	FALSE	FALSE	FALSE	TRUE	FALSE	FALSE
cg11424069	chr1	150363975	150363974	FALSE	FALSE	FALSE	TRUE	TRUE	FALSE
cg11504081	chr1	214552458	214552457	FALSE	FALSE	FALSE	TRUE	FALSE	FALSE
cg11647690	chr1	227948556	227948555	FALSE	FALSE	FALSE	TRUE	FALSE	FALSE
cg11690979	chr1	151721845	151721844	FALSE	FALSE	FALSE	TRUE	TRUE	FALSE
cg11705954	chr1	91546176	91546175	FALSE	FALSE	FALSE	TRUE	FALSE	FALSE
cg11721610	chr1	200611098	200611097	FALSE	FALSE	FALSE	TRUE	FALSE	FALSE
cg11786870	chr1	203607354	203607353	FALSE	FALSE	FALSE	TRUE	FALSE	FALSE
cg11854493	chr1	2498558	2498557	FALSE	FALSE	FALSE	TRUE	FALSE	FALSE
cg11858029	chr1	11264351	11264350	FALSE	FALSE	FALSE	TRUE	FALSE	FALSE
cg11953164	chr1	23194815	23194814	FALSE	FALSE	FALSE	TRUE	FALSE	FALSE
cg12060472	chr1	52921759	52921758	FALSE	FALSE	FALSE	TRUE	TRUE	FALSE
cg12097325	chr1	1141052	1141051	FALSE	FALSE	FALSE	TRUE	FALSE	FALSE
cg12099459	chr1	148354775	148354774	FALSE	FALSE	FALSE	TRUE	TRUE	FALSE
cg12136950	chr1	226662098	226662097	FALSE	FALSE	FALSE	TRUE	FALSE	FALSE
cg12203394	chr1	26922128	26922127	FALSE	FALSE	FALSE	TRUE	FALSE	FALSE
cg12396368	chr1	6234791	6234790	FALSE	FALSE	FALSE	TRUE	FALSE	FALSE
cg12465678	chr1	27626826	27626825	FALSE	FALSE	FALSE	TRUE	FALSE	FALSE
cg12596505	chr1	212916899	212916898	FALSE	FALSE	FALSE	TRUE	TRUE	FALSE
cg12633102	chr1	35210889	35210888	FALSE	FALSE	FALSE	TRUE	FALSE	FALSE
cg12689670	chr1	183040213	183040212	FALSE	FALSE	FALSE	TRUE	FALSE	FALSE
cg12744321	chr1	3858771	3858770	FALSE	FALSE	FALSE	TRUE	FALSE	FALSE
cg12813724	chr1	26364047	26364046	FALSE	FALSE	FALSE	TRUE	TRUE	FALSE
cg13060157	chr1	112743989	112743988	FALSE	FALSE	FALSE	TRUE	FALSE	FALSE
cg13080379	chr1	118984534	118984533	FALSE	FALSE	FALSE	TRUE	FALSE	FALSE
cg13092082	chr1	192633391	192633390	FALSE	FALSE	FALSE	TRUE	FALSE	FALSE
cg13191808	chr1	55039655	55039654	FALSE	FALSE	FALSE	TRUE	FALSE	FALSE
cg13224583	chr1	156913954	156913953	FALSE	FALSE	FALSE	TRUE	FALSE	FALSE
cg13341453	chr1	74673900	74673899	FALSE	FALSE	FALSE	TRUE	TRUE	FALSE
cg13353942	chr1	46544552	46544551	FALSE	FALSE	FALSE	TRUE	TRUE	FALSE
cg13357518	chr1	21936855	21936854	FALSE	FALSE	FALSE	TRUE	FALSE	FALSE
cg13459217	chr1	205357310	205357309	FALSE	FALSE	FALSE	TRUE	FALSE	FALSE
cg13469748	chr1	84506228	84506227	FALSE	FALSE	FALSE	TRUE	FALSE	FALSE
cg13563504	chr1	151805780	151805779	FALSE	FALSE	FALSE	TRUE	TRUE	FALSE
cg13641837	chr1	32650956	32650955	FALSE	FALSE	FALSE	TRUE	FALSE	FALSE
cg13827179	chr1	22342147	22342146	FALSE	FALSE	FALSE	TRUE	FALSE	FALSE
cg13870102	chr1	33306919	33306918	FALSE	FALSE	FALSE	TRUE	TRUE	FALSE
cg13877974	chr1	201739761	201739760	FALSE	FALSE	FALSE	TRUE	FALSE	FALSE
cg13904704	chr1	20367400	20367399	FALSE	FALSE	FALSE	TRUE	FALSE	FALSE
cg13923696	chr1	2855648	2855647	FALSE	FALSE	FALSE	TRUE	FALSE	FALSE
cg13983442	chr1	176205230	176205229	FALSE	FALSE	FALSE	TRUE	FALSE	FALSE
cg14035969	chr1	220895082	220895081	FALSE	FALSE	FALSE	TRUE	FALSE	FALSE
cg14166284	chr1	220882378	220882377	FALSE	FALSE	FALSE	TRUE	FALSE	FALSE
cg14200364	chr1	75796910	75796909	FALSE	FALSE	FALSE	TRUE	FALSE	FALSE
cg14210287	chr1	161725870	161725869	FALSE	FALSE	FALSE	TRUE	FALSE	FALSE
cg14212967	chr1	214272353	214272352	FALSE	FALSE	FALSE	TRUE	TRUE	FALSE
cg14315054	chr1	220895389	220895388	FALSE	FALSE	FALSE	TRUE	TRUE	FALSE
cg14500718	chr1	156281666	156281665	FALSE	FALSE	FALSE	TRUE	FALSE	FALSE
cg14559147	chr1	5860404	5860403	FALSE	FALSE	FALSE	TRUE	FALSE	FALSE
cg14565725	chr1	118989422	118989421	FALSE	FALSE	FALSE	TRUE	FALSE	FALSE
cg14566624	chr1	6261523	6261522	FALSE	FALSE	FALSE	TRUE	FALSE	FALSE
cg14661234	chr1	1213813	1213812	FALSE	FALSE	FALSE	TRUE	TRUE	FALSE
cg14790630	chr1	83860780	83860779	FALSE	FALSE	FALSE	TRUE	FALSE	FALSE
cg14796679	chr1	169712287	169712286	FALSE	FALSE	FALSE	TRUE	TRUE	FALSE
cg14828511	chr1	107056504	107056503	FALSE	FALSE	FALSE	TRUE	FALSE	FALSE
cg14848555	chr1	171781658	171781657	FALSE	FALSE	FALSE	TRUE	FALSE	FALSE
cg14852267	chr1	28237988	28237987	FALSE	FALSE	FALSE	TRUE	TRUE	FALSE
cg14961476	chr1	9070680	9070679	FALSE	FALSE	FALSE	TRUE	FALSE	FALSE
cg14993491	chr1	55039299	55039298	FALSE	FALSE	FALSE	TRUE	FALSE	FALSE
cg15025200	chr1	152188762	152188761	FALSE	FALSE	FALSE	TRUE	FALSE	FALSE
cg15050111	chr1	24319361	24319360	FALSE	FALSE	FALSE	TRUE	FALSE	FALSE
cg15076824	chr1	159715396	159715395	FALSE	FALSE	FALSE	TRUE	FALSE	FALSE
cg15130102	chr1	212916775	212916774	FALSE	FALSE	FALSE	TRUE	TRUE	FALSE
cg15131146	chr1	25775265	25775264	FALSE	FALSE	FALSE	TRUE	FALSE	FALSE
cg15196156	chr1	39922724	39922723	FALSE	FALSE	FALSE	TRUE	FALSE	FALSE
cg15311933	chr1	19312404	19312403	FALSE	FALSE	FALSE	TRUE	TRUE	FALSE
cg15448366	chr1	223129708	223129707	FALSE	FALSE	FALSE	TRUE	TRUE	FALSE
cg15450098	chr1	220884220	220884219	FALSE	FALSE	FALSE	TRUE	FALSE	FALSE
cg15522984	chr1	183022549	183022548	FALSE	FALSE	FALSE	TRUE	FALSE	FALSE
cg15590113	chr1	17116486	17116485	FALSE	FALSE	FALSE	TRUE	FALSE	FALSE
cg15603548	chr1	11949338	11949337	FALSE	FALSE	FALSE	TRUE	TRUE	FALSE
cg15633699	chr1	1421349	1421348	FALSE	FALSE	FALSE	TRUE	FALSE	FALSE
cg15817769	chr1	230136796	230136795	FALSE	FALSE	FALSE	TRUE	FALSE	FALSE
cg15976388	chr1	114154325	114154324	FALSE	FALSE	FALSE	TRUE	TRUE	FALSE
cg15998505	chr1	153507226	153507225	FALSE	FALSE	FALSE	TRUE	TRUE	FALSE
cg16007395	chr1	32765470	32765469	FALSE	FALSE	FALSE	TRUE	FALSE	FALSE
cg16125762	chr1	181022979	181022978	FALSE	FALSE	FALSE	TRUE	FALSE	FALSE
cg16140954	chr1	3900046	3900045	FALSE	FALSE	FALSE	TRUE	FALSE	FALSE
cg16246661	chr1	230136865	230136864	FALSE	FALSE	FALSE	TRUE	FALSE	FALSE
cg16268769	chr1	156920991	156920990	FALSE	FALSE	FALSE	TRUE	FALSE	FALSE
cg16354520	chr1	152699232	152699231	FALSE	FALSE	FALSE	TRUE	FALSE	FALSE
cg16427752	chr1	75796618	75796617	FALSE	FALSE	FALSE	TRUE	FALSE	FALSE
cg16489975	chr1	154760960	154760959	FALSE	FALSE	FALSE	TRUE	FALSE	FALSE
cg16557698	chr1	37047890	37047889	FALSE	FALSE	FALSE	TRUE	TRUE	FALSE
cg16608348	chr1	214551139	214551138	FALSE	FALSE	FALSE	TRUE	FALSE	FALSE
cg16681526	chr1	6466410	6466409	FALSE	FALSE	FALSE	TRUE	FALSE	FALSE
cg16698674	chr1	230136612	230136611	FALSE	FALSE	FALSE	TRUE	TRUE	FALSE
cg16733203	chr1	11337955	11337954	FALSE	FALSE	FALSE	TRUE	FALSE	FALSE
cg16823064	chr1	18880066	18880065	FALSE	FALSE	FALSE	TRUE	FALSE	FALSE
cg16965552	chr1	48471345	48471344	FALSE	FALSE	FALSE	TRUE	FALSE	FALSE
cg16987567	chr1	33324774	33324773	FALSE	FALSE	FALSE	TRUE	FALSE	FALSE
cg16990280	chr1	1743241	1743240	FALSE	FALSE	FALSE	TRUE	FALSE	FALSE
cg16996144	chr1	66752268	66752267	FALSE	FALSE	FALSE	TRUE	FALSE	FALSE
cg17140222	chr1	51919376	51919375	FALSE	FALSE	FALSE	TRUE	FALSE	FALSE
cg17167852	chr1	55039517	55039516	FALSE	FALSE	FALSE	TRUE	FALSE	FALSE
cg17180237	chr1	119002653	119002652	FALSE	FALSE	FALSE	TRUE	FALSE	FALSE
cg17189494	chr1	11680609	11680608	FALSE	FALSE	FALSE	TRUE	TRUE	FALSE
cg17327404	chr1	32765509	32765508	FALSE	FALSE	FALSE	TRUE	FALSE	FALSE
cg17331569	chr1	160818346	160818345	FALSE	FALSE	FALSE	TRUE	FALSE	FALSE
cg17428085	chr1	47449337	47449336	FALSE	FALSE	FALSE	TRUE	FALSE	FALSE
cg17439967	chr1	229509029	229509028	FALSE	FALSE	FALSE	TRUE	FALSE	FALSE
cg17457884	chr1	28370147	28370146	FALSE	FALSE	FALSE	TRUE	FALSE	FALSE
cg17500055	chr1	235642261	235642260	FALSE	FALSE	FALSE	TRUE	FALSE	FALSE
cg17558126	chr1	206506918	206506917	FALSE	FALSE	FALSE	TRUE	TRUE	FALSE
cg17707347	chr1	234479222	234479221	FALSE	FALSE	FALSE	TRUE	FALSE	FALSE
cg17716664	chr1	165235563	165235562	FALSE	FALSE	FALSE	TRUE	FALSE	FALSE
cg17736895	chr1	111623652	111623651	FALSE	FALSE	FALSE	TRUE	FALSE	FALSE
cg17759806	chr1	248691888	248691887	FALSE	FALSE	FALSE	TRUE	FALSE	FALSE
cg17841765	chr1	22234207	22234206	FALSE	FALSE	FALSE	TRUE	TRUE	FALSE
cg18116902	chr1	83860984	83860983	FALSE	FALSE	FALSE	TRUE	FALSE	FALSE
cg18121669	chr1	26234438	26234437	FALSE	FALSE	FALSE	TRUE	FALSE	FALSE
cg18200075	chr1	161736504	161736503	FALSE	FALSE	FALSE	TRUE	FALSE	FALSE
cg18592365	chr1	79006852	79006851	FALSE	FALSE	FALSE	TRUE	FALSE	FALSE
cg18770446	chr1	1174604	1174603	FALSE	FALSE	FALSE	TRUE	TRUE	FALSE
cg18812909	chr1	40862607	40862606	FALSE	FALSE	FALSE	TRUE	FALSE	FALSE
cg18877525	chr1	244139991	244139990	FALSE	FALSE	FALSE	TRUE	FALSE	FALSE
cg18878351	chr1	10649287	10649286	FALSE	FALSE	FALSE	TRUE	TRUE	FALSE
cg18880390	chr1	175192993	175192992	FALSE	FALSE	FALSE	TRUE	FALSE	FALSE
cg18884942	chr1	161710132	161710131	FALSE	FALSE	FALSE	TRUE	TRUE	FALSE
cg18965989	chr1	109283796	109283795	FALSE	FALSE	FALSE	TRUE	TRUE	FALSE
cg18983672	chr1	47415585	47415584	FALSE	FALSE	FALSE	TRUE	FALSE	FALSE
cg19267254	chr1	15501581	15501580	FALSE	FALSE	FALSE	TRUE	FALSE	FALSE
cg19306970	chr1	220881756	220881755	FALSE	FALSE	FALSE	TRUE	FALSE	FALSE
cg19357275	chr1	248691740	248691739	FALSE	FALSE	FALSE	TRUE	FALSE	FALSE
cg19717595	chr1	57421984	57421983	FALSE	FALSE	FALSE	TRUE	TRUE	FALSE
cg19751897	chr1	52055156	52055155	FALSE	FALSE	FALSE	TRUE	FALSE	FALSE
cg19760917	chr1	2480205	2480204	FALSE	FALSE	FALSE	TRUE	FALSE	FALSE
cg19765450	chr1	201112255	201112254	FALSE	FALSE	FALSE	TRUE	FALSE	FALSE
cg19767650	chr1	183636047	183636046	FALSE	FALSE	FALSE	TRUE	FALSE	FALSE
cg19821682	chr1	4789004	4789003	FALSE	FALSE	FALSE	TRUE	FALSE	FALSE
cg20148187	chr1	204412125	204412124	FALSE	FALSE	FALSE	TRUE	FALSE	FALSE
cg20246707	chr1	154591554	154591553	FALSE	FALSE	FALSE	TRUE	FALSE	FALSE
cg20247486	chr1	119001707	119001706	FALSE	FALSE	FALSE	TRUE	FALSE	FALSE
cg20267580	chr1	84754448	84754447	FALSE	FALSE	FALSE	TRUE	FALSE	FALSE
cg20318096	chr1	31373264	31373263	FALSE	FALSE	FALSE	TRUE	FALSE	FALSE
cg20329210	chr1	228378380	228378379	FALSE	FALSE	FALSE	TRUE	FALSE	FALSE
cg20410995	chr1	89198863	89198862	FALSE	FALSE	FALSE	TRUE	TRUE	FALSE
cg20465661	chr1	248388109	248388108	FALSE	FALSE	FALSE	TRUE	FALSE	FALSE
cg20609715	chr1	8598523	8598522	FALSE	FALSE	FALSE	TRUE	FALSE	FALSE
cg20619374	chr1	20589687	20589686	FALSE	FALSE	FALSE	TRUE	TRUE	FALSE
cg20677516	chr1	202811930	202811929	FALSE	FALSE	FALSE	TRUE	FALSE	FALSE
cg20683815	chr1	214552366	214552365	FALSE	FALSE	FALSE	TRUE	FALSE	FALSE
cg20740434	chr1	60621836	60621835	FALSE	FALSE	FALSE	TRUE	FALSE	FALSE
cg20780708	chr1	53197143	53197142	FALSE	FALSE	FALSE	TRUE	FALSE	FALSE
cg20971488	chr1	228650549	228650548	FALSE	FALSE	FALSE	TRUE	FALSE	FALSE
cg20985980	chr1	28505602	28505601	FALSE	FALSE	FALSE	TRUE	FALSE	FALSE
cg21079113	chr1	109467468	109467467	FALSE	FALSE	FALSE	TRUE	FALSE	FALSE
cg21106899	chr1	11719747	11719746	FALSE	FALSE	FALSE	TRUE	FALSE	FALSE
cg21199495	chr1	155086687	155086686	FALSE	FALSE	FALSE	TRUE	FALSE	FALSE
cg21218544	chr1	236795231	236795230	FALSE	FALSE	FALSE	TRUE	FALSE	FALSE
cg21282663	chr1	220880563	220880562	FALSE	FALSE	FALSE	TRUE	FALSE	FALSE
cg21401794	chr1	89633502	89633501	FALSE	FALSE	FALSE	TRUE	FALSE	FALSE
cg21436055	chr1	227558411	227558410	FALSE	FALSE	FALSE	TRUE	FALSE	FALSE
cg21452808	chr1	25573645	25573644	FALSE	FALSE	FALSE	TRUE	TRUE	FALSE
cg21460053	chr1	109656232	109656231	FALSE	FALSE	FALSE	TRUE	FALSE	FALSE
cg21538631	chr1	52925991	52925990	FALSE	FALSE	FALSE	TRUE	FALSE	FALSE
cg21545522	chr1	205269172	205269171	FALSE	FALSE	FALSE	TRUE	TRUE	FALSE
cg21807930	chr1	9014844	9014843	FALSE	FALSE	FALSE	TRUE	FALSE	FALSE
cg21826606	chr1	25266565	25266564	FALSE	FALSE	FALSE	TRUE	FALSE	FALSE
cg21919968	chr1	148351298	148351297	FALSE	FALSE	FALSE	TRUE	FALSE	FALSE
cg22016747	chr1	11594905	11594904	FALSE	FALSE	FALSE	TRUE	FALSE	FALSE
cg22035229	chr1	75796964	75796963	FALSE	FALSE	FALSE	TRUE	FALSE	FALSE
cg22078638	chr1	207322019	207322018	FALSE	FALSE	FALSE	TRUE	FALSE	FALSE
cg22082438	chr1	55527146	55527145	FALSE	FALSE	FALSE	TRUE	FALSE	FALSE
cg22082456	chr1	52926867	52926866	FALSE	FALSE	FALSE	TRUE	FALSE	FALSE
cg22128645	chr1	92960246	92960245	FALSE	FALSE	FALSE	TRUE	TRUE	FALSE
cg22129364	chr1	52602223	52602222	FALSE	FALSE	FALSE	TRUE	FALSE	FALSE
cg22157494	chr1	3858264	3858263	FALSE	FALSE	FALSE	TRUE	FALSE	FALSE
cg22166728	chr1	32924924	32924923	FALSE	FALSE	FALSE	TRUE	TRUE	FALSE
cg22221320	chr1	89198658	89198657	FALSE	FALSE	FALSE	TRUE	TRUE	FALSE
cg22307414	chr1	205632290	205632289	FALSE	FALSE	FALSE	TRUE	FALSE	FALSE
cg22359828	chr1	181545081	181545080	FALSE	FALSE	FALSE	TRUE	FALSE	FALSE
cg22421699	chr1	27934857	27934856	FALSE	FALSE	FALSE	TRUE	FALSE	FALSE
cg22427475	chr1	74673787	74673786	FALSE	FALSE	FALSE	TRUE	TRUE	FALSE
cg22491976	chr1	41241973	41241972	FALSE	FALSE	FALSE	TRUE	FALSE	FALSE
cg22511455	chr1	206923429	206923428	FALSE	FALSE	FALSE	TRUE	TRUE	FALSE
cg22616525	chr1	152697510	152697509	FALSE	FALSE	FALSE	TRUE	FALSE	FALSE
cg22711251	chr1	109656188	109656187	FALSE	FALSE	FALSE	TRUE	FALSE	FALSE
cg22861691	chr1	153671347	153671346	FALSE	FALSE	FALSE	TRUE	FALSE	FALSE
cg22871559	chr1	206556927	206556926	FALSE	FALSE	FALSE	TRUE	TRUE	FALSE
cg23028721	chr1	248201928	248201927	FALSE	FALSE	FALSE	TRUE	FALSE	FALSE
cg23075506	chr1	212515656	212515655	FALSE	FALSE	FALSE	TRUE	FALSE	FALSE
cg23096144	chr1	225825254	225825253	FALSE	FALSE	FALSE	TRUE	FALSE	FALSE
cg23274951	chr1	161201843	161201842	FALSE	FALSE	FALSE	TRUE	FALSE	FALSE
cg23523648	chr1	65149215	65149214	FALSE	FALSE	FALSE	TRUE	FALSE	FALSE
cg23589174	chr1	11499926	11499925	FALSE	FALSE	FALSE	TRUE	FALSE	FALSE
cg23631229	chr1	7902791	7902790	FALSE	FALSE	FALSE	TRUE	TRUE	FALSE
cg23706211	chr1	109250233	109250232	FALSE	FALSE	FALSE	TRUE	FALSE	FALSE
cg23735745	chr1	230112375	230112374	FALSE	FALSE	FALSE	TRUE	TRUE	FALSE
cg23812948	chr1	1095277	1095276	FALSE	FALSE	FALSE	TRUE	FALSE	FALSE
cg23970458	chr1	168483959	168483958	FALSE	FALSE	FALSE	TRUE	FALSE	FALSE
cg24049493	chr1	41920271	41920270	FALSE	FALSE	FALSE	TRUE	FALSE	FALSE
cg24153003	chr1	151764206	151764205	FALSE	FALSE	FALSE	TRUE	FALSE	FALSE
cg24296786	chr1	45491343	45491342	FALSE	FALSE	FALSE	TRUE	FALSE	FALSE
cg24301290	chr1	2466099	2466098	FALSE	FALSE	FALSE	TRUE	FALSE	FALSE
cg24323958	chr1	108199263	108199262	FALSE	FALSE	FALSE	TRUE	TRUE	FALSE
cg24332770	chr1	152685812	152685811	FALSE	FALSE	FALSE	TRUE	FALSE	FALSE
cg24346776	chr1	148264750	148264749	FALSE	FALSE	FALSE	TRUE	TRUE	FALSE
cg24371534	chr1	3468366	3468365	FALSE	FALSE	FALSE	TRUE	FALSE	FALSE
cg24465469	chr1	214551098	214551097	FALSE	FALSE	FALSE	TRUE	FALSE	FALSE
cg24484971	chr1	211493111	211493110	FALSE	FALSE	FALSE	TRUE	FALSE	FALSE
cg24499839	chr1	231626493	231626492	FALSE	FALSE	FALSE	TRUE	TRUE	FALSE
cg24525340	chr1	1946097	1946096	FALSE	FALSE	FALSE	TRUE	TRUE	FALSE
cg24590633	chr1	212791930	212791929	FALSE	FALSE	FALSE	TRUE	FALSE	FALSE
cg24604749	chr1	220880500	220880499	FALSE	FALSE	FALSE	TRUE	FALSE	FALSE
cg24633390	chr1	173190608	173190607	FALSE	FALSE	FALSE	TRUE	FALSE	FALSE
cg24649713	chr1	2194541	2194540	FALSE	FALSE	FALSE	TRUE	FALSE	FALSE
cg24674024	chr1	3895614	3895613	FALSE	FALSE	FALSE	TRUE	TRUE	FALSE
cg24692177	chr1	85580254	85580253	FALSE	FALSE	FALSE	TRUE	FALSE	FALSE
cg24995240	chr1	84505442	84505441	FALSE	FALSE	FALSE	TRUE	FALSE	FALSE
cg25013852	chr1	63593271	63593270	FALSE	FALSE	FALSE	TRUE	FALSE	FALSE
cg25141417	chr1	23619885	23619884	FALSE	FALSE	FALSE	TRUE	FALSE	FALSE
cg25256723	chr1	169586707	169586706	FALSE	FALSE	FALSE	TRUE	FALSE	FALSE
cg25602756	chr1	247448580	247448579	FALSE	FALSE	FALSE	TRUE	TRUE	FALSE
cg25722041	chr1	8563415	8563414	FALSE	FALSE	FALSE	TRUE	FALSE	FALSE
cg25723394	chr1	214552257	214552256	FALSE	FALSE	FALSE	TRUE	FALSE	FALSE
cg25957967	chr1	55039476	55039475	FALSE	FALSE	FALSE	TRUE	FALSE	FALSE
cg26004771	chr1	178486959	178486958	FALSE	FALSE	FALSE	TRUE	FALSE	FALSE
cg26036067	chr1	211675834	211675833	FALSE	FALSE	FALSE	TRUE	FALSE	FALSE
cg26105278	chr1	3707491	3707490	FALSE	FALSE	FALSE	TRUE	FALSE	FALSE
cg26119331	chr1	214552481	214552480	FALSE	FALSE	FALSE	TRUE	FALSE	FALSE
cg26148377	chr1	153633240	153633239	FALSE	FALSE	FALSE	TRUE	TRUE	FALSE
cg26232308	chr1	17875044	17875043	FALSE	FALSE	FALSE	TRUE	FALSE	FALSE
cg26266099	chr1	32926038	32926037	FALSE	FALSE	FALSE	TRUE	FALSE	FALSE
cg26314055	chr1	1247279	1247278	FALSE	FALSE	FALSE	TRUE	FALSE	FALSE
cg26347197	chr1	83860987	83860986	FALSE	FALSE	FALSE	TRUE	FALSE	FALSE
cg26406441	chr1	32961541	32961540	FALSE	FALSE	FALSE	TRUE	FALSE	FALSE
cg26525772	chr1	230136560	230136559	FALSE	FALSE	FALSE	TRUE	TRUE	FALSE
cg26563583	chr1	175192917	175192916	FALSE	FALSE	FALSE	TRUE	FALSE	FALSE
cg26643377	chr1	11650404	11650403	FALSE	FALSE	FALSE	TRUE	FALSE	FALSE
cg26666107	chr1	55039401	55039400	FALSE	FALSE	FALSE	TRUE	FALSE	FALSE
cg26678765	chr1	116110473	116110472	FALSE	FALSE	FALSE	TRUE	FALSE	FALSE
cg26787863	chr1	204317340	204317339	FALSE	FALSE	FALSE	TRUE	FALSE	FALSE
cg26877327	chr1	62441946	62441945	FALSE	FALSE	FALSE	TRUE	FALSE	FALSE
cg26913977	chr1	192808506	192808505	FALSE	FALSE	FALSE	TRUE	FALSE	FALSE
cg27182133	chr1	10598091	10598090	FALSE	FALSE	FALSE	TRUE	FALSE	FALSE
cg27268184	chr1	74673898	74673897	FALSE	FALSE	FALSE	TRUE	TRUE	FALSE
cg27392775	chr1	202955166	202955165	FALSE	FALSE	FALSE	TRUE	FALSE	FALSE
cg27515966	chr1	246699419	246699418	FALSE	FALSE	FALSE	TRUE	FALSE	FALSE
cg27528222	chr1	2207515	2207514	FALSE	FALSE	FALSE	TRUE	FALSE	FALSE
cg27540189	chr1	16493165	16493164	FALSE	FALSE	FALSE	TRUE	FALSE	FALSE
cg27541604	chr1	159076662	159076661	FALSE	FALSE	FALSE	TRUE	FALSE	FALSE
cg27563952	chr1	182588848	182588847	FALSE	FALSE	FALSE	TRUE	TRUE	FALSE
cg27566858	chr1	207910755	207910754	FALSE	FALSE	FALSE	TRUE	FALSE	FALSE
cg27631599	chr1	1173441	1173440	FALSE	FALSE	FALSE	TRUE	FALSE	FALSE
ch.1.58573617F	chr1	58335358	58335357	FALSE	FALSE	FALSE	TRUE	FALSE	FALSE
ch.1.87505147F	chr1	87266877	87266876	FALSE	FALSE	FALSE	TRUE	FALSE	FALSE
ch.1.93237475F	chr1	92999331	92999330	FALSE	FALSE	FALSE	TRUE	TRUE	FALSE
cg00023024	chr1	23194780	23194779	FALSE	FALSE	FALSE	FALSE	TRUE	FALSE
cg00040744	chr1	101376365	101376364	FALSE	FALSE	FALSE	FALSE	TRUE	FALSE
cg00135618	chr1	26932865	26932864	FALSE	FALSE	FALSE	FALSE	TRUE	FALSE
cg00142815	chr1	205269131	205269130	FALSE	FALSE	FALSE	FALSE	TRUE	FALSE
cg00247512	chr1	116572686	116572685	FALSE	FALSE	FALSE	FALSE	TRUE	FALSE
cg00247530	chr1	48228955	48228954	FALSE	FALSE	FALSE	FALSE	TRUE	FALSE
cg00255405	chr1	179366464	179366463	FALSE	FALSE	FALSE	FALSE	TRUE	FALSE
cg00328217	chr1	201899266	201899265	FALSE	FALSE	FALSE	FALSE	TRUE	FALSE
cg00397522	chr1	94012846	94012845	FALSE	FALSE	FALSE	FALSE	TRUE	FALSE
cg00403919	chr1	46407047	46407046	FALSE	FALSE	FALSE	FALSE	TRUE	FALSE
cg00514003	chr1	218674493	218674492	FALSE	FALSE	FALSE	FALSE	TRUE	FALSE
cg00648735	chr1	113220068	113220067	FALSE	FALSE	FALSE	FALSE	TRUE	FALSE
cg00656881	chr1	2207319	2207318	FALSE	FALSE	FALSE	FALSE	TRUE	FALSE
cg00666014	chr1	95438065	95438064	FALSE	FALSE	FALSE	FALSE	TRUE	FALSE
cg00700866	chr1	37630434	37630433	FALSE	FALSE	FALSE	FALSE	TRUE	FALSE
cg00837947	chr1	182589414	182589413	FALSE	FALSE	FALSE	FALSE	TRUE	FALSE
cg00866264	chr1	48221212	48221211	FALSE	FALSE	FALSE	FALSE	TRUE	FALSE
cg00874055	chr1	236143374	236143373	FALSE	FALSE	FALSE	FALSE	TRUE	FALSE
cg00931336	chr1	30414968	30414967	FALSE	FALSE	FALSE	FALSE	TRUE	FALSE
cg00940659	chr1	45007027	45007026	FALSE	FALSE	FALSE	FALSE	TRUE	FALSE
cg00988328	chr1	56967557	56967556	FALSE	FALSE	FALSE	FALSE	TRUE	FALSE
cg01031615	chr1	5881918	5881917	FALSE	FALSE	FALSE	FALSE	TRUE	FALSE
cg01245068	chr1	110496341	110496340	FALSE	FALSE	FALSE	FALSE	TRUE	FALSE
cg01362143	chr1	248472423	248472422	FALSE	FALSE	FALSE	FALSE	TRUE	FALSE
cg01402634	chr1	233296107	233296106	FALSE	FALSE	FALSE	FALSE	TRUE	FALSE
cg01448881	chr1	160114474	160114473	FALSE	FALSE	FALSE	FALSE	TRUE	FALSE
cg01502535	chr1	22841596	22841595	FALSE	FALSE	FALSE	FALSE	TRUE	FALSE
cg01597358	chr1	65236401	65236400	FALSE	FALSE	FALSE	FALSE	TRUE	FALSE
cg01609658	chr1	151722003	151722002	FALSE	FALSE	FALSE	FALSE	TRUE	FALSE
cg01612182	chr1	156623469	156623468	FALSE	FALSE	FALSE	FALSE	TRUE	FALSE
cg01656955	chr1	39672295	39672294	FALSE	FALSE	FALSE	FALSE	TRUE	FALSE
cg01730433	chr1	18531115	18531114	FALSE	FALSE	FALSE	FALSE	TRUE	FALSE
cg01809819	chr1	30719319	30719318	FALSE	FALSE	FALSE	FALSE	TRUE	FALSE
cg01953068	chr1	18407270	18407269	FALSE	FALSE	FALSE	FALSE	TRUE	FALSE
cg01968256	chr1	17016228	17016227	FALSE	FALSE	FALSE	FALSE	TRUE	FALSE
cg01974817	chr1	29475741	29475740	FALSE	FALSE	FALSE	FALSE	TRUE	FALSE
cg02020667	chr1	68010615	68010614	FALSE	FALSE	FALSE	FALSE	TRUE	FALSE
cg02025632	chr1	182589721	182589720	FALSE	FALSE	FALSE	FALSE	TRUE	FALSE
cg02063079	chr1	166838607	166838606	FALSE	FALSE	FALSE	FALSE	TRUE	FALSE
cg02132783	chr1	67135281	67135280	FALSE	FALSE	FALSE	FALSE	TRUE	FALSE
cg02141814	chr1	35884130	35884129	FALSE	FALSE	FALSE	FALSE	TRUE	FALSE
cg02330710	chr1	28746207	28746206	FALSE	FALSE	FALSE	FALSE	TRUE	FALSE
cg02334877	chr1	210310899	210310898	FALSE	FALSE	FALSE	FALSE	TRUE	FALSE
cg02349066	chr1	182588412	182588411	FALSE	FALSE	FALSE	FALSE	TRUE	FALSE
cg02380535	chr1	184633893	184633892	FALSE	FALSE	FALSE	FALSE	TRUE	FALSE
cg02400530	chr1	1779442	1779441	FALSE	FALSE	FALSE	FALSE	TRUE	FALSE
cg02410801	chr1	54580393	54580392	FALSE	FALSE	FALSE	FALSE	TRUE	FALSE
cg02438943	chr1	204685892	204685891	FALSE	FALSE	FALSE	FALSE	TRUE	FALSE
cg02496470	chr1	91530099	91530098	FALSE	FALSE	FALSE	FALSE	TRUE	FALSE
cg02530879	chr1	231809224	231809223	FALSE	FALSE	FALSE	FALSE	TRUE	FALSE
cg02534642	chr1	19036510	19036509	FALSE	FALSE	FALSE	FALSE	TRUE	FALSE
cg02558542	chr1	211681256	211681255	FALSE	FALSE	FALSE	FALSE	TRUE	FALSE
cg02565946	chr1	67539598	67539597	FALSE	FALSE	FALSE	FALSE	TRUE	FALSE
cg02568684	chr1	4173363	4173362	FALSE	FALSE	FALSE	FALSE	TRUE	FALSE
cg02582404	chr1	21346355	21346354	FALSE	FALSE	FALSE	FALSE	TRUE	FALSE
cg02584225	chr1	170667429	170667428	FALSE	FALSE	FALSE	FALSE	TRUE	FALSE
cg02644386	chr1	31594104	31594103	FALSE	FALSE	FALSE	FALSE	TRUE	FALSE
cg02691373	chr1	3881049	3881048	FALSE	FALSE	FALSE	FALSE	TRUE	FALSE
cg02713706	chr1	247518448	247518447	FALSE	FALSE	FALSE	FALSE	TRUE	FALSE
cg02756939	chr1	211383235	211383234	FALSE	FALSE	FALSE	FALSE	TRUE	FALSE
cg02803556	chr1	25934303	25934302	FALSE	FALSE	FALSE	FALSE	TRUE	FALSE
cg02813845	chr1	52928081	52928080	FALSE	FALSE	FALSE	FALSE	TRUE	FALSE
cg02873163	chr1	153627354	153627353	FALSE	FALSE	FALSE	FALSE	TRUE	FALSE
cg02880629	chr1	109740654	109740653	FALSE	FALSE	FALSE	FALSE	TRUE	FALSE
cg02925615	chr1	70504547	70504546	FALSE	FALSE	FALSE	FALSE	TRUE	FALSE
cg03003668	chr1	154868414	154868413	FALSE	FALSE	FALSE	FALSE	TRUE	FALSE
cg03006637	chr1	4011212	4011211	FALSE	FALSE	FALSE	FALSE	TRUE	FALSE
cg03224850	chr1	18872662	18872661	FALSE	FALSE	FALSE	FALSE	TRUE	FALSE
cg03340041	chr1	26170901	26170900	FALSE	FALSE	FALSE	FALSE	TRUE	FALSE
cg03424262	chr1	154348439	154348438	FALSE	FALSE	FALSE	FALSE	TRUE	FALSE
cg03486816	chr1	2981188	2981187	FALSE	FALSE	FALSE	FALSE	TRUE	FALSE
cg03569909	chr1	46442709	46442708	FALSE	FALSE	FALSE	FALSE	TRUE	FALSE
cg03627985	chr1	91827943	91827942	FALSE	FALSE	FALSE	FALSE	TRUE	FALSE
cg03698781	chr1	34669823	34669822	FALSE	FALSE	FALSE	FALSE	TRUE	FALSE
cg03711673	chr1	207902912	207902911	FALSE	FALSE	FALSE	FALSE	TRUE	FALSE
cg03715459	chr1	201464805	201464804	FALSE	FALSE	FALSE	FALSE	TRUE	FALSE
cg03792111	chr1	189149834	189149833	FALSE	FALSE	FALSE	FALSE	TRUE	FALSE
cg03827427	chr1	205813882	205813881	FALSE	FALSE	FALSE	FALSE	TRUE	FALSE
cg03833272	chr1	27934968	27934967	FALSE	FALSE	FALSE	FALSE	TRUE	FALSE
cg03879730	chr1	151253562	151253561	FALSE	FALSE	FALSE	FALSE	TRUE	FALSE
cg03987748	chr1	231626614	231626613	FALSE	FALSE	FALSE	FALSE	TRUE	FALSE
cg04060051	chr1	209590677	209590676	FALSE	FALSE	FALSE	FALSE	TRUE	FALSE
cg04073724	chr1	76154650	76154649	FALSE	FALSE	FALSE	FALSE	TRUE	FALSE
cg04227998	chr1	228043646	228043645	FALSE	FALSE	FALSE	FALSE	TRUE	FALSE
cg04341486	chr1	41282587	41282586	FALSE	FALSE	FALSE	FALSE	TRUE	FALSE
cg04434328	chr1	6520114	6520113	FALSE	FALSE	FALSE	FALSE	TRUE	FALSE
cg04464434	chr1	41859912	41859911	FALSE	FALSE	FALSE	FALSE	TRUE	FALSE
cg04465928	chr1	178010998	178010997	FALSE	FALSE	FALSE	FALSE	TRUE	FALSE
cg04545003	chr1	109740721	109740720	FALSE	FALSE	FALSE	FALSE	TRUE	FALSE
cg04582838	chr1	225877684	225877683	FALSE	FALSE	FALSE	FALSE	TRUE	FALSE
cg04680713	chr1	221878564	221878563	FALSE	FALSE	FALSE	FALSE	TRUE	FALSE
cg04700907	chr1	66248850	66248849	FALSE	FALSE	FALSE	FALSE	TRUE	FALSE
cg04701785	chr1	9404677	9404676	FALSE	FALSE	FALSE	FALSE	TRUE	FALSE
cg04773714	chr1	115841094	115841093	FALSE	FALSE	FALSE	FALSE	TRUE	FALSE
cg04793907	chr1	210438618	210438617	FALSE	FALSE	FALSE	FALSE	TRUE	FALSE
cg04805131	chr1	159009023	159009022	FALSE	FALSE	FALSE	FALSE	TRUE	FALSE
cg04919516	chr1	201739292	201739291	FALSE	FALSE	FALSE	FALSE	TRUE	FALSE
cg05149320	chr1	160864074	160864073	FALSE	FALSE	FALSE	FALSE	TRUE	FALSE
cg05155746	chr1	11459268	11459267	FALSE	FALSE	FALSE	FALSE	TRUE	FALSE
cg05397857	chr1	1369791	1369790	FALSE	FALSE	FALSE	FALSE	TRUE	FALSE
cg05454848	chr1	11448111	11448110	FALSE	FALSE	FALSE	FALSE	TRUE	FALSE
cg05514783	chr1	47725765	47725764	FALSE	FALSE	FALSE	FALSE	TRUE	FALSE
cg05550760	chr1	110927418	110927417	FALSE	FALSE	FALSE	FALSE	TRUE	FALSE
cg05715293	chr1	27934888	27934887	FALSE	FALSE	FALSE	FALSE	TRUE	FALSE
cg05753482	chr1	192893518	192893517	FALSE	FALSE	FALSE	FALSE	TRUE	FALSE
cg05841700	chr1	205850256	205850255	FALSE	FALSE	FALSE	FALSE	TRUE	FALSE
cg05857773	chr1	215005523	215005522	FALSE	FALSE	FALSE	FALSE	TRUE	FALSE
cg05864683	chr1	232599636	232599635	FALSE	FALSE	FALSE	FALSE	TRUE	FALSE
cg05901141	chr1	47918774	47918773	FALSE	FALSE	FALSE	FALSE	TRUE	FALSE
cg06150815	chr1	111428310	111428309	FALSE	FALSE	FALSE	FALSE	TRUE	FALSE
cg06161010	chr1	112064477	112064476	FALSE	FALSE	FALSE	FALSE	TRUE	FALSE
cg06184761	chr1	158700972	158700971	FALSE	FALSE	FALSE	FALSE	TRUE	FALSE
cg06191042	chr1	208252358	208252357	FALSE	FALSE	FALSE	FALSE	TRUE	FALSE
cg06407172	chr1	6385857	6385856	FALSE	FALSE	FALSE	FALSE	TRUE	FALSE
cg06436493	chr1	211492097	211492096	FALSE	FALSE	FALSE	FALSE	TRUE	FALSE
cg06493301	chr1	30006130	30006129	FALSE	FALSE	FALSE	FALSE	TRUE	FALSE
cg06494734	chr1	160864057	160864056	FALSE	FALSE	FALSE	FALSE	TRUE	FALSE
cg06496648	chr1	47023290	47023289	FALSE	FALSE	FALSE	FALSE	TRUE	FALSE
cg06546876	chr1	62906793	62906792	FALSE	FALSE	FALSE	FALSE	TRUE	FALSE
cg06598365	chr1	11772644	11772643	FALSE	FALSE	FALSE	FALSE	TRUE	FALSE
cg06600967	chr1	153968510	153968509	FALSE	FALSE	FALSE	FALSE	TRUE	FALSE
cg06662252	chr1	16520663	16520662	FALSE	FALSE	FALSE	FALSE	TRUE	FALSE
cg06678733	chr1	25248418	25248417	FALSE	FALSE	FALSE	FALSE	TRUE	FALSE
cg06787764	chr1	46203199	46203198	FALSE	FALSE	FALSE	FALSE	TRUE	FALSE
cg06792911	chr1	42959352	42959351	FALSE	FALSE	FALSE	FALSE	TRUE	FALSE
cg06825886	chr1	30775698	30775697	FALSE	FALSE	FALSE	FALSE	TRUE	FALSE
cg06869292	chr1	182069289	182069288	FALSE	FALSE	FALSE	FALSE	TRUE	FALSE
cg07115878	chr1	243731471	243731470	FALSE	FALSE	FALSE	FALSE	TRUE	FALSE
cg07133861	chr1	156360146	156360145	FALSE	FALSE	FALSE	FALSE	TRUE	FALSE
cg07218956	chr1	14977881	14977880	FALSE	FALSE	FALSE	FALSE	TRUE	FALSE
cg07355428	chr1	169550561	169550560	FALSE	FALSE	FALSE	FALSE	TRUE	FALSE
cg07405674	chr1	178725170	178725169	FALSE	FALSE	FALSE	FALSE	TRUE	FALSE
cg07408569	chr1	6520328	6520327	FALSE	FALSE	FALSE	FALSE	TRUE	FALSE
cg07424646	chr1	25704511	25704510	FALSE	FALSE	FALSE	FALSE	TRUE	FALSE
cg07510284	chr1	209937435	209937434	FALSE	FALSE	FALSE	FALSE	TRUE	FALSE
cg07533224	chr1	205850218	205850217	FALSE	FALSE	FALSE	FALSE	TRUE	FALSE
cg07588874	chr1	41614085	41614084	FALSE	FALSE	FALSE	FALSE	TRUE	FALSE
cg07643626	chr1	10785805	10785804	FALSE	FALSE	FALSE	FALSE	TRUE	FALSE
cg07698266	chr1	199163578	199163577	FALSE	FALSE	FALSE	FALSE	TRUE	FALSE
cg07702486	chr1	248349078	248349077	FALSE	FALSE	FALSE	FALSE	TRUE	FALSE
cg07731392	chr1	203768845	203768844	FALSE	FALSE	FALSE	FALSE	TRUE	FALSE
cg07862031	chr1	46203157	46203156	FALSE	FALSE	FALSE	FALSE	TRUE	FALSE
cg07883627	chr1	39738722	39738721	FALSE	FALSE	FALSE	FALSE	TRUE	FALSE
cg07960470	chr1	23722735	23722734	FALSE	FALSE	FALSE	FALSE	TRUE	FALSE
cg07982099	chr1	219991788	219991787	FALSE	FALSE	FALSE	FALSE	TRUE	FALSE
cg08040962	chr1	157821179	157821178	FALSE	FALSE	FALSE	FALSE	TRUE	FALSE
cg08123411	chr1	230877319	230877318	FALSE	FALSE	FALSE	FALSE	TRUE	FALSE
cg08156924	chr1	182589741	182589740	FALSE	FALSE	FALSE	FALSE	TRUE	FALSE
cg08160980	chr1	46203169	46203168	FALSE	FALSE	FALSE	FALSE	TRUE	FALSE
cg08284931	chr1	115842488	115842487	FALSE	FALSE	FALSE	FALSE	TRUE	FALSE
cg08295452	chr1	9203082	9203081	FALSE	FALSE	FALSE	FALSE	TRUE	FALSE
cg08376771	chr1	179591535	179591534	FALSE	FALSE	FALSE	FALSE	TRUE	FALSE
cg08496872	chr1	10230215	10230214	FALSE	FALSE	FALSE	FALSE	TRUE	FALSE
cg08525331	chr1	109740604	109740603	FALSE	FALSE	FALSE	FALSE	TRUE	FALSE
cg08545598	chr1	153866551	153866550	FALSE	FALSE	FALSE	FALSE	TRUE	FALSE
cg08611640	chr1	12448918	12448917	FALSE	FALSE	FALSE	FALSE	TRUE	FALSE
cg08745595	chr1	169586775	169586774	FALSE	FALSE	FALSE	FALSE	TRUE	FALSE
cg08835468	chr1	64082720	64082719	FALSE	FALSE	FALSE	FALSE	TRUE	FALSE
cg08838517	chr1	231626623	231626622	FALSE	FALSE	FALSE	FALSE	TRUE	FALSE
cg08863976	chr1	232462532	232462531	FALSE	FALSE	FALSE	FALSE	TRUE	FALSE
cg08912276	chr1	152399242	152399241	FALSE	FALSE	FALSE	FALSE	TRUE	FALSE
cg08926958	chr1	229849107	229849106	FALSE	FALSE	FALSE	FALSE	TRUE	FALSE
cg09003612	chr1	42959552	42959551	FALSE	FALSE	FALSE	FALSE	TRUE	FALSE
cg09067269	chr1	152372533	152372532	FALSE	FALSE	FALSE	FALSE	TRUE	FALSE
cg09142221	chr1	3327584	3327583	FALSE	FALSE	FALSE	FALSE	TRUE	FALSE
cg09148471	chr1	109191494	109191493	FALSE	FALSE	FALSE	FALSE	TRUE	FALSE
cg09168320	chr1	65565364	65565363	FALSE	FALSE	FALSE	FALSE	TRUE	FALSE
cg09200014	chr1	74733494	74733493	FALSE	FALSE	FALSE	FALSE	TRUE	FALSE
cg09212210	chr1	44113584	44113583	FALSE	FALSE	FALSE	FALSE	TRUE	FALSE
cg09229466	chr1	15172566	15172565	FALSE	FALSE	FALSE	FALSE	TRUE	FALSE
cg09305898	chr1	231626627	231626626	FALSE	FALSE	FALSE	FALSE	TRUE	FALSE
cg09354782	chr1	115281766	115281765	FALSE	FALSE	FALSE	FALSE	TRUE	FALSE
cg09355428	chr1	212468058	212468057	FALSE	FALSE	FALSE	FALSE	TRUE	FALSE
cg09369493	chr1	63012401	63012400	FALSE	FALSE	FALSE	FALSE	TRUE	FALSE
cg09373171	chr1	240337928	240337927	FALSE	FALSE	FALSE	FALSE	TRUE	FALSE
cg09390181	chr1	18106699	18106698	FALSE	FALSE	FALSE	FALSE	TRUE	FALSE
cg09433222	chr1	67135140	67135139	FALSE	FALSE	FALSE	FALSE	TRUE	FALSE
cg09449562	chr1	203031615	203031614	FALSE	FALSE	FALSE	FALSE	TRUE	FALSE
cg09568594	chr1	24555950	24555949	FALSE	FALSE	FALSE	FALSE	TRUE	FALSE
cg09629734	chr1	218669587	218669586	FALSE	FALSE	FALSE	FALSE	TRUE	FALSE
cg09629866	chr1	171189066	171189065	FALSE	FALSE	FALSE	FALSE	TRUE	FALSE
cg09686010	chr1	3531719	3531718	FALSE	FALSE	FALSE	FALSE	TRUE	FALSE
cg09737265	chr1	91405157	91405156	FALSE	FALSE	FALSE	FALSE	TRUE	FALSE
cg09740935	chr1	205930487	205930486	FALSE	FALSE	FALSE	FALSE	TRUE	FALSE
cg09759386	chr1	13892402	13892401	FALSE	FALSE	FALSE	FALSE	TRUE	FALSE
cg09791107	chr1	45557598	45557597	FALSE	FALSE	FALSE	FALSE	TRUE	FALSE
cg09880891	chr1	230159548	230159547	FALSE	FALSE	FALSE	FALSE	TRUE	FALSE
cg09905178	chr1	171257214	171257213	FALSE	FALSE	FALSE	FALSE	TRUE	FALSE
cg09975787	chr1	6727446	6727445	FALSE	FALSE	FALSE	FALSE	TRUE	FALSE
cg10001905	chr1	15171803	15171802	FALSE	FALSE	FALSE	FALSE	TRUE	FALSE
cg10055680	chr1	60887183	60887182	FALSE	FALSE	FALSE	FALSE	TRUE	FALSE
cg10110780	chr1	28246629	28246628	FALSE	FALSE	FALSE	FALSE	TRUE	FALSE
cg10137383	chr1	53135258	53135257	FALSE	FALSE	FALSE	FALSE	TRUE	FALSE
cg10181156	chr1	171435292	171435291	FALSE	FALSE	FALSE	FALSE	TRUE	FALSE
cg10234330	chr1	165769658	165769657	FALSE	FALSE	FALSE	FALSE	TRUE	FALSE
cg10320312	chr1	45365240	45365239	FALSE	FALSE	FALSE	FALSE	TRUE	FALSE
cg10420426	chr1	247183230	247183229	FALSE	FALSE	FALSE	FALSE	TRUE	FALSE
cg10483611	chr1	15737688	15737687	FALSE	FALSE	FALSE	FALSE	TRUE	FALSE
cg10489050	chr1	248521752	248521751	FALSE	FALSE	FALSE	FALSE	TRUE	FALSE
cg10740215	chr1	182589254	182589253	FALSE	FALSE	FALSE	FALSE	TRUE	FALSE
cg10793760	chr1	4173541	4173540	FALSE	FALSE	FALSE	FALSE	TRUE	FALSE
cg10855283	chr1	161225826	161225825	FALSE	FALSE	FALSE	FALSE	TRUE	FALSE
cg10901801	chr1	248348725	248348724	FALSE	FALSE	FALSE	FALSE	TRUE	FALSE
cg10931420	chr1	182589273	182589272	FALSE	FALSE	FALSE	FALSE	TRUE	FALSE
cg11081247	chr1	24415127	24415126	FALSE	FALSE	FALSE	FALSE	TRUE	FALSE
cg11133623	chr1	21521182	21521181	FALSE	FALSE	FALSE	FALSE	TRUE	FALSE
cg11134437	chr1	46407042	46407041	FALSE	FALSE	FALSE	FALSE	TRUE	FALSE
cg11164522	chr1	38418837	38418836	FALSE	FALSE	FALSE	FALSE	TRUE	FALSE
cg11169316	chr1	113905927	113905926	FALSE	FALSE	FALSE	FALSE	TRUE	FALSE
cg11226105	chr1	28776008	28776007	FALSE	FALSE	FALSE	FALSE	TRUE	FALSE
cg11268598	chr1	19771563	19771562	FALSE	FALSE	FALSE	FALSE	TRUE	FALSE
cg11282105	chr1	76279644	76279643	FALSE	FALSE	FALSE	FALSE	TRUE	FALSE
cg11305072	chr1	37620947	37620946	FALSE	FALSE	FALSE	FALSE	TRUE	FALSE
cg11462967	chr1	246301037	246301036	FALSE	FALSE	FALSE	FALSE	TRUE	FALSE
cg11501313	chr1	162678578	162678577	FALSE	FALSE	FALSE	FALSE	TRUE	FALSE
cg11558507	chr1	93021849	93021848	FALSE	FALSE	FALSE	FALSE	TRUE	FALSE
cg11596404	chr1	153627297	153627296	FALSE	FALSE	FALSE	FALSE	TRUE	FALSE
cg11610429	chr1	22704828	22704827	FALSE	FALSE	FALSE	FALSE	TRUE	FALSE
cg11640200	chr1	181423697	181423696	FALSE	FALSE	FALSE	FALSE	TRUE	FALSE
cg11649715	chr1	119000818	119000817	FALSE	FALSE	FALSE	FALSE	TRUE	FALSE
cg11701819	chr1	181073708	181073707	FALSE	FALSE	FALSE	FALSE	TRUE	FALSE
cg11704005	chr1	18676455	18676454	FALSE	FALSE	FALSE	FALSE	TRUE	FALSE
cg11985186	chr1	54499321	54499320	FALSE	FALSE	FALSE	FALSE	TRUE	FALSE
cg12108642	chr1	36836380	36836379	FALSE	FALSE	FALSE	FALSE	TRUE	FALSE
cg12117407	chr1	56503155	56503154	FALSE	FALSE	FALSE	FALSE	TRUE	FALSE
cg12223939	chr1	230508290	230508289	FALSE	FALSE	FALSE	FALSE	TRUE	FALSE
cg12345380	chr1	1244682	1244681	FALSE	FALSE	FALSE	FALSE	TRUE	FALSE
cg12410597	chr1	199163533	199163532	FALSE	FALSE	FALSE	FALSE	TRUE	FALSE
cg12437479	chr1	41432899	41432898	FALSE	FALSE	FALSE	FALSE	TRUE	FALSE
cg12442246	chr1	16678270	16678269	FALSE	FALSE	FALSE	FALSE	TRUE	FALSE
cg12456433	chr1	91404059	91404058	FALSE	FALSE	FALSE	FALSE	TRUE	FALSE
cg12466983	chr1	203141070	203141069	FALSE	FALSE	FALSE	FALSE	TRUE	FALSE
cg12577882	chr1	56502873	56502872	FALSE	FALSE	FALSE	FALSE	TRUE	FALSE
cg12590793	chr1	5832083	5832082	FALSE	FALSE	FALSE	FALSE	TRUE	FALSE
cg12651933	chr1	15172056	15172055	FALSE	FALSE	FALSE	FALSE	TRUE	FALSE
cg12778567	chr1	27099698	27099697	FALSE	FALSE	FALSE	FALSE	TRUE	FALSE
cg12820366	chr1	18814910	18814909	FALSE	FALSE	FALSE	FALSE	TRUE	FALSE
cg12886054	chr1	160863952	160863951	FALSE	FALSE	FALSE	FALSE	TRUE	FALSE
cg12895728	chr1	208252236	208252235	FALSE	FALSE	FALSE	FALSE	TRUE	FALSE
cg12898220	chr1	205850229	205850228	FALSE	FALSE	FALSE	FALSE	TRUE	FALSE
cg12981534	chr1	74731714	74731713	FALSE	FALSE	FALSE	FALSE	TRUE	FALSE
cg13023668	chr1	234532621	234532620	FALSE	FALSE	FALSE	FALSE	TRUE	FALSE
cg13092735	chr1	162382696	162382695	FALSE	FALSE	FALSE	FALSE	TRUE	FALSE
cg13108653	chr1	21937997	21937996	FALSE	FALSE	FALSE	FALSE	TRUE	FALSE
cg13132858	chr1	197464218	197464217	FALSE	FALSE	FALSE	FALSE	TRUE	FALSE
cg13285289	chr1	238558396	238558395	FALSE	FALSE	FALSE	FALSE	TRUE	FALSE
cg13294652	chr1	228229047	228229046	FALSE	FALSE	FALSE	FALSE	TRUE	FALSE
cg13509283	chr1	15416334	15416333	FALSE	FALSE	FALSE	FALSE	TRUE	FALSE
cg13516249	chr1	156773058	156773057	FALSE	FALSE	FALSE	FALSE	TRUE	FALSE
cg13666471	chr1	43783816	43783815	FALSE	FALSE	FALSE	FALSE	TRUE	FALSE
cg13727659	chr1	163063784	163063783	FALSE	FALSE	FALSE	FALSE	TRUE	FALSE
cg13789229	chr1	7502245	7502244	FALSE	FALSE	FALSE	FALSE	TRUE	FALSE
cg13973074	chr1	248786569	248786568	FALSE	FALSE	FALSE	FALSE	TRUE	FALSE
cg13975894	chr1	47023056	47023055	FALSE	FALSE	FALSE	FALSE	TRUE	FALSE
cg14004768	chr1	8424644	8424643	FALSE	FALSE	FALSE	FALSE	TRUE	FALSE
cg14134508	chr1	151806320	151806319	FALSE	FALSE	FALSE	FALSE	TRUE	FALSE
cg14210988	chr1	147491512	147491511	FALSE	FALSE	FALSE	FALSE	TRUE	FALSE
cg14269708	chr1	13892433	13892432	FALSE	FALSE	FALSE	FALSE	TRUE	FALSE
cg14353677	chr1	11784974	11784973	FALSE	FALSE	FALSE	FALSE	TRUE	FALSE
cg14392798	chr1	205473138	205473137	FALSE	FALSE	FALSE	FALSE	TRUE	FALSE
cg14618562	chr1	76154493	76154492	FALSE	FALSE	FALSE	FALSE	TRUE	FALSE
cg14621698	chr1	109393089	109393088	FALSE	FALSE	FALSE	FALSE	TRUE	FALSE
cg14732015	chr1	244234566	244234565	FALSE	FALSE	FALSE	FALSE	TRUE	FALSE
cg14758788	chr1	244355023	244355022	FALSE	FALSE	FALSE	FALSE	TRUE	FALSE
cg14805718	chr1	85257586	85257585	FALSE	FALSE	FALSE	FALSE	TRUE	FALSE
cg14806693	chr1	32940242	32940241	FALSE	FALSE	FALSE	FALSE	TRUE	FALSE
cg14810798	chr1	213983483	213983482	FALSE	FALSE	FALSE	FALSE	TRUE	FALSE
cg14867388	chr1	115089633	115089632	FALSE	FALSE	FALSE	FALSE	TRUE	FALSE
cg14945834	chr1	42959298	42959297	FALSE	FALSE	FALSE	FALSE	TRUE	FALSE
cg14957195	chr1	205003162	205003161	FALSE	FALSE	FALSE	FALSE	TRUE	FALSE
cg14996491	chr1	41918614	41918613	FALSE	FALSE	FALSE	FALSE	TRUE	FALSE
cg15040770	chr1	23425441	23425440	FALSE	FALSE	FALSE	FALSE	TRUE	FALSE
cg15076259	chr1	201430701	201430700	FALSE	FALSE	FALSE	FALSE	TRUE	FALSE
cg15097530	chr1	204517267	204517266	FALSE	FALSE	FALSE	FALSE	TRUE	FALSE
cg15212364	chr1	32736652	32736651	FALSE	FALSE	FALSE	FALSE	TRUE	FALSE
cg15258974	chr1	54540931	54540930	FALSE	FALSE	FALSE	FALSE	TRUE	FALSE
cg15325734	chr1	9143298	9143297	FALSE	FALSE	FALSE	FALSE	TRUE	FALSE
cg15346919	chr1	110607695	110607694	FALSE	FALSE	FALSE	FALSE	TRUE	FALSE
cg15351573	chr1	156735608	156735607	FALSE	FALSE	FALSE	FALSE	TRUE	FALSE
cg15365029	chr1	110407208	110407207	FALSE	FALSE	FALSE	FALSE	TRUE	FALSE
cg15367245	chr1	31240083	31240082	FALSE	FALSE	FALSE	FALSE	TRUE	FALSE
cg15387272	chr1	36397909	36397908	FALSE	FALSE	FALSE	FALSE	TRUE	FALSE
cg15390314	chr1	246801496	246801495	FALSE	FALSE	FALSE	FALSE	TRUE	FALSE
cg15417666	chr1	1174461	1174460	FALSE	FALSE	FALSE	FALSE	TRUE	FALSE
cg15560047	chr1	238475419	238475418	FALSE	FALSE	FALSE	FALSE	TRUE	FALSE
cg15584788	chr1	6205241	6205240	FALSE	FALSE	FALSE	FALSE	TRUE	FALSE
cg15656567	chr1	29672078	29672077	FALSE	FALSE	FALSE	FALSE	TRUE	FALSE
cg15685385	chr1	117594612	117594611	FALSE	FALSE	FALSE	FALSE	TRUE	FALSE
cg15807154	chr1	41484722	41484721	FALSE	FALSE	FALSE	FALSE	TRUE	FALSE
cg15852709	chr1	212437672	212437671	FALSE	FALSE	FALSE	FALSE	TRUE	FALSE
cg16004875	chr1	18575593	18575592	FALSE	FALSE	FALSE	FALSE	TRUE	FALSE
cg16193928	chr1	218156639	218156638	FALSE	FALSE	FALSE	FALSE	TRUE	FALSE
cg16282977	chr1	153617046	153617045	FALSE	FALSE	FALSE	FALSE	TRUE	FALSE
cg16293300	chr1	14683342	14683341	FALSE	FALSE	FALSE	FALSE	TRUE	FALSE
cg16325770	chr1	205918954	205918953	FALSE	FALSE	FALSE	FALSE	TRUE	FALSE
cg16334093	chr1	205850473	205850472	FALSE	FALSE	FALSE	FALSE	TRUE	FALSE
cg16343357	chr1	223715547	223715546	FALSE	FALSE	FALSE	FALSE	TRUE	FALSE
cg16394775	chr1	178724480	178724479	FALSE	FALSE	FALSE	FALSE	TRUE	FALSE
cg16484858	chr1	8424635	8424634	FALSE	FALSE	FALSE	FALSE	TRUE	FALSE
cg16491492	chr1	178693496	178693495	FALSE	FALSE	FALSE	FALSE	TRUE	FALSE
cg16624729	chr1	156959843	156959842	FALSE	FALSE	FALSE	FALSE	TRUE	FALSE
cg16644209	chr1	230311207	230311206	FALSE	FALSE	FALSE	FALSE	TRUE	FALSE
cg16674699	chr1	204179104	204179103	FALSE	FALSE	FALSE	FALSE	TRUE	FALSE
cg16764945	chr1	19882324	19882323	FALSE	FALSE	FALSE	FALSE	TRUE	FALSE
cg16831933	chr1	30783404	30783403	FALSE	FALSE	FALSE	FALSE	TRUE	FALSE
cg16833163	chr1	6735830	6735829	FALSE	FALSE	FALSE	FALSE	TRUE	FALSE
cg16837016	chr1	39688075	39688074	FALSE	FALSE	FALSE	FALSE	TRUE	FALSE
cg16975064	chr1	203182190	203182189	FALSE	FALSE	FALSE	FALSE	TRUE	FALSE
cg16993213	chr1	5991299	5991298	FALSE	FALSE	FALSE	FALSE	TRUE	FALSE
cg17003250	chr1	171344575	171344574	FALSE	FALSE	FALSE	FALSE	TRUE	FALSE
cg17036570	chr1	160951593	160951592	FALSE	FALSE	FALSE	FALSE	TRUE	FALSE
cg17048213	chr1	171743411	171743410	FALSE	FALSE	FALSE	FALSE	TRUE	FALSE
cg17220933	chr1	206556286	206556285	FALSE	FALSE	FALSE	FALSE	TRUE	FALSE
cg17283691	chr1	160837621	160837620	FALSE	FALSE	FALSE	FALSE	TRUE	FALSE
cg17339882	chr1	62131286	62131285	FALSE	FALSE	FALSE	FALSE	TRUE	FALSE
cg17344694	chr1	46203110	46203109	FALSE	FALSE	FALSE	FALSE	TRUE	FALSE
cg17345026	chr1	158118136	158118135	FALSE	FALSE	FALSE	FALSE	TRUE	FALSE
cg17479169	chr1	84999022	84999021	FALSE	FALSE	FALSE	FALSE	TRUE	FALSE
[truncated: 34,907 more rows]

## Sheet: mQTLs
CpG	chr	CpG_start	CpG_end	snp	hg38_pos_start	hg38_pos_end	Rank	Backward_nom_pval	Backward_slope	Backward_slope_se
cg01789792	chr1	923168	923167	1:860788:TTGGCGC:T	925408	925414	0	4.07521e-08	-0.514408	0.0889163
cg00582671	chr1	936856	936855	rs4504834:871683:G:A	936303	936303	0	1.37788e-08	-0.223936	0.037286
cg07582955	chr1	961384	961383	exm2253575	946247	946247	0	1.03488e-06	-0.0922182	0.0181004
cg07390924	chr1	966346	966345	rs7522959:905165:A:G	969785	969785	0	4.37542e-08	0.280251	0.0485646
cg25107893	chr1	976222	976221	rs7417106:911595:A:G	976215	976215	1	7.15991e-08	0.827101	0.145907
cg23635910	chr1	976676	976675	rs9777703	993456	993456	1	2.7156e-06	1.42193	0.291539
cg09582238	chr1	981284	981283	rs2341354	983193	983193	0	9.71166e-08	-0.156686	0.0279544
cg11782208	chr1	982513	982512	rs2341354	983193	983193	0	5.47785e-07	0.173497	0.0331416
cg03394722	chr1	984537	984536	rs2341357:919998:A:C	984618	984618	0	4.32697e-15	-0.324692	0.0371495
cg00299257	chr1	1020838	1020837	rs151160018:776556:C:T	841176	841176	0	6.814e-14	1.07126	0.129599
cg04919596	chr1	1060675	1060674	rs2799072:990773:C:T	1055393	1055393	0	2.54246e-07	0.18483	0.0342206
cg21779088	chr1	1065477	1065476	rs60881902:984494:GC:G	1049114	1049115	0	1.92015e-12	0.250928	0.0326797
cg11200797	chr1	1081091	1081090	rs2275812:985446:G:T	1050066	1050066	0	2.44947e-09	-0.20021	0.0315379
cg00918900	chr1	1121956	1121955	rs80109121:1044319:C:T	1108939	1108939	0	1.42149e-07	0.19081	0.0345366
cg05528516	chr1	1134661	1134660	rs112054464:1069420:G:C	1134040	1134040	0	5.07925e-07	-0.19199	0.036559
cg22433276	chr1	1137263	1137262	rs56956005:1072613:C:G	1137233	1137233	0	4.68375e-18	0.295975	0.0299408
cg12097325	chr1	1141052	1141051	rs55750860:1077962:C:T	1142582	1142582	0	5.89723e-07	0.25035	0.04797
cg13560058	chr1	1161854	1161853	rs55750860:1077962:C:T	1142582	1142582	0	4.22555e-07	-0.141596	0.0267588
cg27631599	chr1	1173441	1173440	rs11260536:1108518:T:C	1173138	1173138	0	1.39833e-07	0.288134	0.0521195
cg21288685	chr1	1173865	1173864	rs11260536:1108518:T:C	1173138	1173138	0	3.26138e-17	0.24286	0.025395
cg22335801	chr1	1213712	1213711	rs115516254:1127561:T:C	1192181	1192181	0	1.66361e-07	-0.472635	0.0860658
cg00211609	chr1	1242660	1242659	rs12036216:1153113:G:A	1217733	1217733	0	1.32635e-17	-0.246842	0.0254139
cg02279987	chr1	1246378	1246377	rs75972122:1151973:G:C	1216593	1216593	0	3.86672e-14	-0.235094	0.0281075
cg20747739	chr1	1247878	1247877	1:1183443:T:C	1248063	1248063	0	1.89794e-10	-0.212328	0.031051
cg21679391	chr1	1351538	1351537	rs2765029:1316670:C:G	1381290	1381290	0	7.66296e-08	-0.269423	0.047647
cg14793596	chr1	1354713	1354712	rs34050356:2078250:T:G	2146811	2146811	0	9.5511e-08	0.56826	0.101321
cg17132079	chr1	1358761	1358760	rs1810745:1257593:A:G	1322213	1322213	0	9.80233e-09	0.306763	0.0505023
cg22273474	chr1	1358886	1358885	rs150789461:1284490:G:A	1349110	1349110	0	4.42981e-14	0.383361	0.0459634
cg18550476	chr1	1358974	1358973	rs1810745:1257593:A:G	1322213	1322213	0	2.41654e-07	0.261784	0.0483709
cg00970622	chr1	1358983	1358982	rs28755011:1436059:C:T	1500679	1500679	0	1.24873e-07	1.69063	0.304496
cg00970622	chr1	1358983	1358982	rs150215528:1301807:AGTGTGATTGAATGAGT:A	1366427	1366443	1	5.46558e-07	1.2077	0.230675
cg02416993	chr1	1364380	1364379	1:1299479:CCATG:C	1364099	1364103	0	7.88856e-15	-0.276846	0.0320515
cg18546249	chr1	1375649	1375648	rs9730511:1311542:G:C	1376162	1376162	0	3.6659e-26	-0.263417	0.0203761
cg00060374	chr1	1419856	1419855	rs1781134:1357461:C:T	1422081	1422081	0	4.76031e-17	0.497238	0.0523396
cg22827694	chr1	1421063	1421062	rs34817085:1350601:G:T	1415221	1415221	0	5.6949e-07	0.245575	0.0469864
cg15633699	chr1	1421349	1421348	rs1781133:1355583:C:A	1420203	1420203	0	4.95246e-09	0.337323	0.0543197
cg10156298	chr1	1426097	1426096	rs200966758:1359141:CCAT:C	1423761	1423764	0	6.52778e-08	0.314758	0.0553379
cg12208770	chr1	1426287	1426286	rs200966758:1359141:CCAT:C	1423761	1423764	0	1.11885e-07	0.19778	0.0354741
cg00391668	chr1	1468694	1468693	rs61776614:2166406:C:T	2234967	2234967	0	1.63526e-06	-0.161838	0.0324167
cg15487867	chr1	1540363	1540362	rs7516190:1485347:C:G	1549967	1549967	0	8.86564e-09	0.489191	0.0802702
cg00955674	chr1	1543448	1543447	rs35890823:1514790:AT:A	1579410	1579411	0	9.50333e-10	0.164736	0.0252208
cg16848272	chr1	1575612	1575611	rs3766176:1486903:T:C	1551523	1551523	0	1.02206e-09	-0.265436	0.0407251
cg11649182	chr1	1604544	1604543	exm3962	1616547	1616547	0	7.46912e-07	-0.143097	0.0276944
cg14976190	chr1	1684298	1684297	rs138369165:1639046:C:G	1707607	1707607	0	1.01142e-07	-0.113781	0.0203306
cg16990280	chr1	1743241	1743240	rs11486028:1674677:G:C	1743238	1743238	0	3.42412e-10	0.228695	0.0339983
cg13336641	chr1	1789011	1789010	rs70937183:1651077:C:CTCGCTCTGTCACCCAGGCT	1719638	1719638	0	7.16256e-07	-0.21493	0.0415226
cg23982607	chr1	1891941	1891940	1:1866721:T:C	1935282	1935282	0	1.82414e-07	-0.158096	0.0288919
cg13027345	chr1	1930306	1930305	rs56378990:1163474:A:G	1228094	1228094	0	1.11314e-06	-0.236298	0.0465283
cg08967668	chr1	1935888	1935887	rs2803325:1872412:C:T	1940973	1940973	0	2.35501e-16	0.264418	0.0286395
cg11456906	chr1	1937682	1937681	rs3121831:1866004:G:A	1934565	1934565	0	1.42005e-16	-0.284097	0.0304906
cg13111532	chr1	1955105	1955104	rs74473635:1886204:A:AGAGT	1954765	1954765	1	5.23083e-08	-0.679084	0.118435
cg12035532	chr1	1955327	1955326	rs151085750:1884029:A:AAAAG	1952590	1952590	0	1.08224e-08	-0.26396	0.0435979
cg22619719	chr1	1960140	1960139	rs76274023:1911326:G:A	1979887	1979887	0	3.84578e-07	-0.133257	0.0250863
cg24495298	chr1	1966347	1966346	rs61233860:1900106:T:TCTC	1968667	1968667	0	8.86688e-12	-0.150423	0.0203185
cg00213113	chr1	2001732	2001731	rs6675751:1926102:G:C	1994663	1994663	0	4.55863e-08	-0.230099	0.0399324
cg08510499	chr1	2139964	2139963	rs3128293:2065339:A:G	2133900	2133900	0	5.48146e-08	-0.160144	0.0279769
cg06854565	chr1	2157340	2157339	rs262675:2079682:A:G	2148243	2148243	0	1.98814e-10	0.203633	0.0298176
cg24649713	chr1	2194541	2194540	rs34825103:2120733:T:TG	2189294	2189294	0	2.79533e-11	0.173562	0.0241266
cg27528222	chr1	2207515	2207514	rs145625268:2087035:GTGA:G	2155596	2155599	0	2.41564e-11	-0.291998	0.0404397
cg02185870	chr1	2237791	2237790	rs34974355:2166484:A:AT	2235045	2235045	0	3.41925e-09	0.175422	0.0279205
cg21194808	chr1	2274060	2274059	rs12047069:2205548:A:C	2274109	2274109	0	6.70424e-11	-0.268978	0.0382487
cg14300062	chr1	93584717	93584716	rs12740779:94053973:A:G	93588416	93588416	0	7.83398e-10	-0.206584	0.031449
cg01466031	chr1	93585148	93585147	rs35193256:94052066:AT:A	93586509	93586510	0	1.17316e-15	-0.310202	0.0346135
cg00624378	chr1	93692608	93692607	rs1106833:94045355:T:C	93579798	93579798	0	6.06245e-12	0.860431	0.115154
cg20651314	chr1	93732688	93732687	rs143191232:94317436:A:T	93851880	93851880	0	1.61481e-06	-0.243269	0.0486999
cg17344060	chr1	93879611	93879610	rs58410484:94196349:C:T	93730793	93730793	0	7.687e-08	-0.275148	0.0486651
cg15054400	chr1	93879931	93879930	rs17881810:94360756:G:C	93895200	93895200	0	1.58972e-09	-0.358581	0.0557463
cg25275758	chr1	93996120	93996119	exm75970	93996161	93996161	0	7.53253e-09	0.495003	0.0807931
cg22475139	chr1	94092570	94092569	rs4147882:94558255:TA:T	94092699	94092700	0	1.83567e-10	0.189322	0.0276613
cg08916447	chr1	94117451	94117450	rs3838282:94583038:A:G	94117482	94117482	0	1.02405e-09	0.161903	0.0248418
cg04491808	chr1	94119897	94119896	rs61773101:95582202:T:C	95116646	95116646	0	3.39541e-07	0.24166	0.0452641
cg24061914	chr1	94542924	94542923	rs1361600	94542362	94542362	0	1.3195e-09	-0.134951	0.0208629
cg20817062	chr1	94819794	94819793	rs6662427:95224881:G:A	94759325	94759325	0	1.12056e-07	-0.108516	0.0194646
cg00505133	chr1	94854904	94854903	rs146053551:95424925:A:G	94959369	94959369	0	4.82777e-08	-0.327296	0.0569172
cg10607462	chr1	94926000	94925999	rs76032537:95391570:A:G	94926014	94926014	0	4.50528e-10	0.186304	0.0279127
cg01206378	chr1	95233272	95233271	rs259349:95726637:T:A	95261081	95261081	0	1.12252e-06	0.196179	0.0386429
cg20535221	chr1	95509677	95509676	rs874821	95507474	95507474	0	9.33865e-07	-0.0878764	0.0171714
cg26267890	chr1	95954464	95954463	rs1379970:96455093:T:C	95989537	95989537	0	5.69263e-07	-0.171452	0.0328037
cg10096813	chr1	96389121	96389120	rs1592193:96365356:G:A	95899800	95899800	0	1.99532e-11	1.08851	0.150024
cg08223091	chr1	96753232	96753231	rs150293311:96250919:A:C	95785363	95785363	0	1.89839e-09	0.937145	0.146477
cg13239004	chr1	98749004	98749003	rs9659936:99178663:A:C	98713107	98713107	0	1.42945e-28	1.26803	0.0916718
cg05108386	chr1	99503615	99503614	rs60546763:99972474:C:CA	99506918	99506918	0	3.57081e-07	-0.10467	0.0196452
cg10841437	chr1	99544552	99544551	rs57760329:100011883:A:T	99546327	99546327	0	4.57822e-10	-0.14177	0.0212502
cg05009352	chr1	99685839	99685838	rs58405312:100159552:C:CT	99693996	99693996	0	2.04469e-09	0.228298	0.035764
cg20948262	chr1	99766422	99766421	rs7543433:100277039:T:C	99811483	99811483	0	2.38905e-08	0.19088	0.0323825
cg19951356	chr1	99766483	99766482	rs72040433:100223506:GA:G	99757950	99757951	0	1.67676e-08	-0.153785	0.0257756
cg24916377	chr1	99766639	99766638	1:100275518:CTT:C	99809962	99809964	0	1.77148e-07	0.196044	0.0357861
cg19693677	chr1	99790854	99790853	rs76833637:100630934:A:G	100165378	100165378	0	4.60578e-12	-0.709195	0.0942882
cg04637881	chr1	100250216	100250215	rs60926925:100716456:T:TTTTG	100250900	100250900	0	2.50132e-23	1.02398	0.0862774
cg00934037	chr1	100424117	100424116	rs56331099:101792769:G:A	101327213	101327213	0	4.14448e-07	-0.245327	0.0463252
cg22600584	chr1	100628959	100628958	rs12568236:101117890:A:C	100652334	100652334	0	1.12761e-08	0.136473	0.0225718
cg04998153	chr1	101357776	101357775	rs10572382:101782733:CTTTTT:C	101317177	101317182	0	1.84669e-08	-0.37683	0.0633669
cg07188009	chr1	106083825	106083824	rs140075689:106247248:C:T	105704626	105704626	0	5.47969e-08	0.461167	0.0805643
cg12137974	chr1	107055605	107055604	rs5776878:107551018:CA:C	107008396	107008397	0	1.12799e-06	0.159958	0.0315148
cg14828511	chr1	107056504	107056503	rs12406721:107563243:G:T	107020621	107020621	0	5.3202e-15	0.232249	0.0266804
cg07133347	chr1	107058141	107058140	rs72442711:107570761:TCTC:T	107028139	107028142	0	3.28487e-09	0.138155	0.0219614
cg24343913	chr1	107394560	107394559	rs5776887:107951247:A:AT	107408625	107408625	0	4.61542e-07	-0.130204	0.0246955
cg14015008	chr1	107516270	107516269	rs7548205:107488402:T:C	106945780	106945780	0	3.86517e-07	-0.214679	0.0404225
cg04659311	chr1	107776699	107776698	rs79814083:107846958:T:G	107304336	107304336	0	6.49327e-07	-0.375229	0.0721902
cg07750604	chr1	108113543	108113542	rs76976196:108657908:AT:A	108115286	108115287	0	1.66071e-09	0.184618	0.0287392
cg06828260	chr1	108190943	108190942	rs12118280:108738780:T:C	108196158	108196158	0	2.57693e-08	-0.289594	0.049258
cg05918124	chr1	108193092	108193091	rs61799377:108741774:T:A	108199152	108199152	0	6.12444e-18	-0.457439	0.0464831
cg04773602	chr1	108199611	108199610	rs663481:108743178:C:G	108200556	108200556	0	2.40582e-08	0.151805	0.0257596
cg15496551	chr1	108201051	108201050	rs11584987:108743514:C:G	108200892	108200892	0	7.41849e-07	0.161739	0.0312933
cg03461243	chr1	108943555	108943554	rs34619390:109494795:A:AT	108952173	108952173	0	2.99653e-07	0.112198	0.0209098
cg27473416	chr1	180953781	180953780	rs141789904:180901510:T:TA	180932374	180932374	0	1.39212e-06	-0.248905	0.0494978
cg06128826	chr1	180977631	180977630	rs1044595:180943529:C:T	180974393	180974393	0	2.60265e-07	0.115181	0.0213452
cg16125762	chr1	181022979	181022978	rs114405188:180726764:C:T	180757628	180757628	0	4.7831e-07	0.377572	0.0717189
cg19853902	chr1	181073765	181073764	rs4652557:181049375:C:G	181080239	181080239	0	4.25941e-13	0.237636	0.0299085
cg22856976	chr1	181078446	181078445	rs76448591:181047438:T:C	181078302	181078302	0	8.87374e-16	0.247955	0.0275227
cg06117891	chr1	181232744	181232743	rs10797696:181192739:C:G	181223603	181223603	0	6.91706e-09	-0.138752	0.0225842
cg15534876	chr1	181345460	181345459	rs144442149:182306703:G:C	182337568	182337568	0	1.61057e-06	0.259315	0.0519061
cg05665882	chr1	181460849	181460848	rs602009:181874667:A:G	181905532	181905532	0	2.63648e-07	-0.624003	0.115699
cg22359828	chr1	181545081	181545080	rs67935857:181504841:C:T	181535705	181535705	0	8.41635e-08	-0.109271	0.0193914
cg12040931	chr1	182262618	182262617	rs77327293:182240244:C:T	182271109	182271109	0	1.84535e-11	-0.482094	0.0663142
cg15522984	chr1	183022549	183022548	rs9943067:182975102:C:T	183005967	183005967	0	6.48199e-10	0.140946	0.0213388
cg06495060	chr1	183024229	183024228	rs34679748:182988321:TA:T	183019186	183019187	0	3.70867e-07	-0.134389	0.025262
cg12689670	chr1	183040213	183040212	rs35853177:183024123:CT:C	183054988	183054989	0	6.47456e-15	0.163494	0.0188546
cg12552165	chr1	183185847	183185846	rs61333702:183138653:AT:A	183169518	183169519	0	4.47714e-09	-0.116526	0.0187043
cg01949993	chr1	183185982	183185981	rs34551793:183024608:TA:T	183055473	183055474	0	5.54025e-09	-0.105971	0.0171258
cg02767663	chr1	183198584	183198583	rs571158:183171361:A:C	183202226	183202226	0	8.80896e-13	-0.174699	0.0223485
cg06748143	chr1	183418505	183418504	rs35164473:183342754:CT:C	183373619	183373620	0	7.83175e-14	0.485649	0.0589256
cg10202457	chr1	183418617	183418616	rs9425595:183369036:C:T	183399901	183399901	0	3.75274e-14	0.208633	0.0249284
cg18116641	chr1	183420031	183420030	1:183310658:CAA:C	183341523	183341525	0	2.96296e-07	0.0959502	0.0178736
cg25008509	chr1	183593559	183593558	rs374167209:183585962:C:T	183616827	183616827	0	7.69489e-08	0.0851052	0.015053
cg04041654	chr1	183610336	183610335	rs1174670:183632435:C:T	183663300	183663300	0	2.51392e-23	0.258779	0.0218055
cg24679106	chr1	183636117	183636116	1:183641073:C:CT	183671938	183671938	0	2.00219e-15	0.235924	0.0265941
cg18856995	chr1	183698249	183698248	rs11581495:183750649:C:T	183781514	183781514	0	2.12804e-07	-0.389169	0.0715493
cg17634520	chr1	183916223	183916222	rs79411014:183854703:A:G	183885569	183885569	0	6.45787e-07	0.319127	0.0613827
cg04200073	chr1	184037984	184037983	rs114661926:184006549:C:G	184037415	184037415	0	1.34352e-06	-0.117837	0.0233963
cg18691233	chr1	187092316	187092315	rs1924732:187071390:A:G	187102258	187102258	0	6.55376e-19	-0.568327	0.0556652
cg03248088	chr1	187794738	187794737	rs2495405:187800996:A:T	187831865	187831865	0	3.71963e-07	0.117229	0.0220389
cg24622997	chr1	190373947	190373946	rs7545105:190365640:G:A	190396510	190396510	0	1.24074e-07	-0.186685	0.0336154
cg24241726	chr1	190680468	190680467	rs11807712:190662425:G:C	190693295	190693295	0	2.47327e-08	0.167352	0.028425
cg08469177	chr1	192453447	192453446	rs1892152:192416374:T:A	192447244	192447244	0	8.57553e-07	0.138678	0.0269985
cg13092082	chr1	192633391	192633390	rs6674661:192606617:A:C	192637487	192637487	0	1.78474e-09	0.151201	0.0235887
cg26227484	chr1	192808326	192808325	rs11305607:192765377:TA:T	192796247	192796248	0	7.14971e-25	-0.490335	0.0393995
cg23627149	chr1	193186144	193186143	rs34268790:193057513:A:AT	193088383	193088383	0	3.20905e-10	-0.197639	0.029328
cg08205993	chr1	193187113	193187112	rs142942063:193098617:A:AATTTATTTATTT	193129487	193129487	0	1.6024e-21	-0.552418	0.049355
cg00905249	chr1	193303580	193303579	exm133014	193105381	193105381	0	7.03519e-16	-1.18265	0.130703
cg11230062	chr1	193732501	193732500	rs5779725:194230328:AT:A	194261198	194261199	0	4.97874e-16	1.47081	0.161509
cg13360115	chr1	194103046	194103045	rs10801282:194004906:G:A	194035776	194035776	0	1.10161e-18	0.297937	0.029428
cg24013909	chr1	29249194	29249193	rs139121461:29575675:C:CACAT	29249163	29249163	0	8.51617e-18	0.36528	0.0373254
cg25160847	chr1	29449144	29449143	rs7552658:30852097:C:T	30379250	30379250	0	5.588e-11	-0.158924	0.022491
cg07922345	chr1	29650024	29650023	rs143648679:29727993:C:T	29401481	29401481	0	1.14201e-06	-0.377805	0.0744755
cg24806360	chr1	29825169	29825168	rs36085495:30298720:T:TCA	29825873	29825873	0	1.16041e-09	0.158918	0.0244742
cg07679975	chr1	30471169	30471168	rs11582232:30943682:A:G	30470835	30470835	0	2.75631e-09	-0.152606	0.0241267
cg17484671	chr1	30685312	30685311	rs522322:31118731:A:G	30645884	30645884	0	1.13328e-06	-0.343856	0.0677603
cg21517016	chr1	30689840	30689839	rs34881668:31142712:GA:G	30669865	30669866	0	9.80452e-11	-0.126031	0.0181036
cg00760904	chr1	30692003	30692002	rs138816952:31157078:AGTTAGTTTGTTT:A	30684231	30684243	0	3.03954e-09	0.23359	0.0370423
cg13134475	chr1	30824252	30824251	rs4012688:31294939:C:CCCT	30822092	30822092	0	1.03839e-34	0.702955	0.0434464
cg20858149	chr1	31240087	31240086	rs12135961:31755330:G:C	31282483	31282483	0	3.45869e-10	-0.156339	0.0232484
cg07221201	chr1	31240357	31240356	rs12135961:31755330:G:C	31282483	31282483	0	1.05935e-14	-0.205343	0.0239132
cg07345934	chr1	31373097	31373096	rs12121101:31725392:G:A	31252545	31252545	0	1.28071e-07	-0.152523	0.027497
cg20318096	chr1	31373264	31373263	rs5773350:31777119:C:CT	31304272	31304272	0	5.69692e-07	-0.154048	0.0294747
cg24539573	chr1	31373696	31373695	rs12404861:31861271:G:A	31388424	31388424	0	1.79189e-07	-0.10774	0.0196757
cg24947847	chr1	31413643	31413642	rs111456525:31893379:G:GTTGT	31420532	31420532	0	4.40863e-11	0.395856	0.0556766
cg17570569	chr1	31563236	31563235	rs10157800:32028770:A:G	31563169	31563169	0	1.85721e-07	-0.123518	0.0225886
cg14074118	chr1	31681930	31681929	rs11310373:32147615:AC:A	31682014	31682015	0	1.45624e-08	-0.135502	0.0226033
cg27650656	chr1	31707819	31707818	rs1127100:32193647:T:C	31728046	31728046	0	2.0912e-07	0.108539	0.0199415
cg24691844	chr1	31788995	31788994	rs144779055:32894885:A:G	32429284	32429284	0	1.17784e-06	0.625806	0.123531
cg03741348	chr1	32246637	32246636	rs11419057:33124151:C:CT	32658550	32658550	0	5.76924e-08	-0.270207	0.0472923
cg12064008	chr1	32362130	32362129	rs2273376:32832292:A:G	32366691	32366691	0	8.73952e-07	0.539524	0.105123
cg21172540	chr1	32362240	32362239	rs10914565:32958395:T:G	32492794	32492794	0	2.31786e-07	0.289275	0.0533627
cg21324883	chr1	32650598	32650597	exm41165	32770188	32770188	0	2.16562e-07	0.360937	0.0664044
cg16007395	chr1	32765470	32765469	rs35154516:33396689:C:CA	32931088	32931088	0	3.2666e-07	-0.135782	0.025393
cg17327404	chr1	32765509	32765508	rs34595471:33290399:C:CT	32824798	32824798	0	1.62743e-06	-0.120157	0.0240626
cg05660436	chr1	32893357	32893356	rs77242526:33344356:AG:A	32878755	32878756	0	7.68581e-07	-0.488684	0.0946938
cg26266099	chr1	32926038	32926037	rs194670:33440699:C:T	32975098	32975098	0	1.07335e-18	0.425873	0.0420469
cg20340029	chr1	32949623	32949622	rs367613864:33421349:CA:C	32955748	32955749	0	6.94191e-07	0.14367	0.0277189
cg12919773	chr1	32959574	32959573	rs67835920:33366074:GGCCTCCCAGAGTGCT:G	32900473	32900488	0	9.6781e-09	0.204484	0.03365
cg10120255	chr1	32961140	32961139	rs35049190:33420339:C:CA	32954738	32954738	0	7.04624e-13	0.233106	0.0296702
cg26406441	chr1	32961541	32961540	rs200136829:33401363:C:CT	32935762	32935762	0	2.12773e-07	-0.303231	0.0557491
cg04306220	chr1	33053635	33053634	rs71909186:33489002:TACA:T	33023401	33023404	0	6.6184e-29	0.668359	0.0478821
cg03177171	chr1	33082203	33082202	rs11448013:33542433:A:AT	33076832	33076832	0	1.98306e-11	-0.146987	0.0202553
cg24398176	chr1	33082215	33082214	rs12732425:33541113:G:A	33075512	33075512	0	1.0729e-10	-0.12621	0.0181731
cg11136886	chr1	33143909	33143908	rs4652979:34474209:G:A	34008608	34008608	0	1.13149e-06	0.212964	0.0419639
cg01676680	chr1	33179171	33179170	rs72656240:33635384:A:G	33169783	33169783	0	3.79053e-07	0.116131	0.0218493
cg23277061	chr1	33268788	33268787	rs148348297:33720329:CTCCCTT:C	33254728	33254734	0	7.44477e-10	-0.115092	0.0174948
cg18238718	chr1	33276769	33276768	rs1570685:33913346:G:A	33447745	33447745	0	1.78391e-07	0.0712979	0.0130183
cg16987567	chr1	33324774	33324773	rs114013172:33916233:A:G	33450632	33450632	0	6.95364e-07	-0.0711985	0.0137377
cg07461987	chr1	33355750	33355749	rs1123295:33910453:A:G	33444852	33444852	0	1.92855e-09	0.624098	0.0975939
cg07461987	chr1	33355750	33355749	rs10157574:33871072:G:A	33405471	33405471	1	1.08491e-06	-1.0654	0.209547
cg15586632	chr1	33376322	33376321	rs11422037:33838721:C:CT	33373120	33373120	0	1.37656e-17	-0.276522	0.0284878
cg09805902	chr1	33534896	33534895	rs923879	33534209	33534209	0	7.91561e-20	0.279876	0.0265121
cg11401957	chr1	33709570	33709569	rs6668431:33796879:G:A	33331278	33331278	0	4.52526e-07	-0.355156	0.0673068
cg00305071	chr1	34038417	34038416	rs2625684	34039514	34039514	0	1.0619e-06	-0.0909517	0.0178719
cg25452854	chr1	217137893	217137892	rs11117777:217325016:T:C	217151674	217151674	0	3.83079e-09	0.127702	0.0203977
cg08096008	chr1	217614520	217614519	rs17046650:217788061:T:A	217614719	217614719	0	8.73336e-27	0.30516	0.0231865
cg17741814	chr1	217631176	217631175	rs111540767:217098144:A:C	216924802	216924802	0	6.27433e-08	0.389687	0.0684123
cg13615839	chr1	217921612	217921611	rs35973312:218097854:T:C	217924512	217924512	0	9.53631e-17	-0.186211	0.0198431
cg21693060	chr1	218031362	218031361	rs5781012:218200934:C:CTAAA	218027592	218027592	0	2.08734e-20	-0.332801	0.030888
cg07763320	chr1	218042180	218042179	rs6700287:218208901:C:T	218035559	218035559	0	1.4248e-17	0.244377	0.0251909
cg14378539	chr1	218524670	218524669	rs2964991:218685232:C:T	218511890	218511890	0	1.9235e-27	-0.388753	0.0289949
cg11598600	chr1	219220963	219220962	rs4846298:219584090:G:A	219410748	219410748	0	1.06815e-12	0.206754	0.0265654
cg13547337	chr1	219665761	219665760	rs71767721:219841036:CCAGA:C	219667694	219667698	0	1.44635e-18	-0.203385	0.0201783
cg16330477	chr1	219747552	219747551	rs4846578:219897709:A:T	219724367	219724367	0	2.12899e-10	0.170774	0.0250534
cg20123108	chr1	219794645	219794644	rs34686274:219960124:T:TA	219786782	219786782	0	5.08866e-11	0.189055	0.0266899
cg17009631	chr1	220089676	220089675	rs140861606:220283480:T:TC	220110138	220110138	0	2.50144e-07	0.184028	0.0340502
cg19720265	chr1	220527542	220527541	rs12123146:220624476:T:C	220451134	220451134	0	2.87073e-08	-0.141744	0.0242004
cg01219672	chr1	220786745	220786744	rs12074049:220909579:G:A	220736237	220736237	0	7.16969e-10	-0.504357	0.076582
cg06291348	chr1	220810512	220810511	rs150293444:221109293:AACC:A	220935951	220935954	0	4.77979e-09	0.185465	0.029832
cg17852326	chr1	220882623	220882622	rs11118608:220987469:C:G	220814127	220814127	0	1.29103e-11	0.308833	0.0421041
cg15450098	chr1	220884220	220884219	rs2738751:221051713:C:G	220878371	220878371	1	2.35522e-07	0.78412	0.144738
cg07241917	chr1	220896358	220896357	rs2491255:221071242:T:G	220897900	220897900	0	5.56759e-12	-0.151496	0.0202336
cg27291539	chr1	221169179	221169178	rs201838560:221343704:A:AT	221170362	221170362	0	6.25233e-15	-0.266994	0.0307692
cg17990279	chr1	221335971	221335970	rs4304588:221476976:C:T	221303634	221303634	0	8.35946e-08	-0.118193	0.0209696
cg19445579	chr1	221892324	221892323	rs7517045:222146669:A:G	221973327	221973327	0	1.39044e-07	0.111482	0.0201612
cg10446396	chr1	222048249	222048248	rs56060561:222187717:A:ACT	222014375	222014375	0	1.09241e-07	-0.143521	0.025719
cg14661425	chr1	222546840	222546839	rs71175170:222756768:G:GA	222583426	222583426	0	7.76195e-08	-0.147578	0.0261113
cg27048098	chr1	222618297	222618296	rs77351792:222857326:A:C	222683984	222683984	0	1.04327e-12	0.482778	0.0619978
cg20875553	chr1	222641668	222641667	rs3002131:222775657:G:C	222602315	222602315	0	6.02413e-07	-0.142422	0.0273142
cg00089945	chr1	222643517	222643516	rs12063226:222927255:A:G	222753913	222753913	0	8.23771e-07	0.219229	0.0426071
cg13253887	chr1	222814157	222814156	rs66605104:222987528:CATT:C	222814186	222814189	0	1.78609e-26	1.03972	0.0797049
cg11882616	chr1	222814985	222814984	rs72004674:222989414:AATATATAT:A	222816072	222816080	0	6.66869e-13	0.218703	0.0278025
cg05141656	chr1	224213325	224213324	rs12565875:224425165:T:A	224237463	224237463	0	7.75197e-08	0.155996	0.0275993
cg16000154	chr1	224356803	224356802	rs11322243:224648475:GT:G	224460773	224460774	0	7.73457e-09	-0.157873	0.0257898
cg21058413	chr1	224358035	224358034	rs35920703:224651116:C:CT	224463414	224463414	0	7.52425e-18	0.248479	0.0253372
cg11060701	chr1	224644643	224644642	1:224833845:G:GACGTAAGACAGTA	224646143	224646143	0	1.22604e-11	0.1642	0.0223572
cg06473507	chr1	225422521	225422520	rs11582134:225566618:C:G	225378916	225378916	0	9.26801e-22	0.51598	0.0457355
cg06939851	chr1	225924835	225924834	rs77157663:226111945:T:C	225924245	225924245	0	2.47102e-09	-0.327849	0.0516579
cg01890404	chr1	12069758	12069757	rs61206685:12130218:TGGG:T	12070161	12070164	0	2.16527e-20	-0.269397	0.0250172
cg01267259	chr1	12084090	12084089	rs111736717:11472334:A:G	11412277	11412277	0	6.5344e-08	0.746895	0.131317
cg11726754	chr1	12230584	12230583	exm-rs4846033	11728507	11728507	0	6.33834e-13	-0.618738	0.0785669
cg10169393	chr1	12555871	12555870	rs12141685:12613820:T:C	12553790	12553790	0	3.9257e-07	-0.157265	0.0296305
cg18888234	chr1	12856183	12856182	rs138150325:12793596:T:C	12733633	12733633	0	2.92975e-10	-0.464722	0.0687848
cg02366878	chr1	14140972	14140971	rs10803459	14137672	14137672	0	1.22218e-19	-0.323322	0.0308354
cg26270573	chr1	14437355	14437354	rs7547198:14767077:A:G	14440581	14440581	0	6.25386e-07	0.133117	0.0255698
cg22353206	chr1	15171468	15171467	rs6429713:15482235:G:C	15155739	15155739	0	3.58814e-08	-0.215306	0.0370485
cg08815479	chr1	15247101	15247100	1:15583141:CAAAAAAAAAAAAAAA:C	15256645	15256660	1	7.81778e-07	0.595543	0.115484
cg20050767	chr1	15272405	15272404	rs55822521:15581004:G:GGGT	15254508	15254508	0	9.59557e-19	0.151396	0.0149203
cg19267254	chr1	15501581	15501580	1:15956091:CAA:C	15629596	15629598	0	3.49569e-08	0.131141	0.0225452
cg04708753	chr1	15524461	15524460	rs4233532:15821585:C:T	15495090	15495090	0	3.53511e-30	1.06137	0.0735035
cg09992259	chr1	15541998	15541997	rs111689880:15817519:AG:A	15491024	15491025	0	1.03122e-25	-0.633117	0.0496188
cg23749507	chr1	15585231	15585230	rs76986450:15852060:GA:G	15525565	15525566	0	2.80675e-10	-0.13803	0.0204058
cg10182306	chr1	16031417	16031416	rs2003943:16366365:C:G	16039870	16039870	0	1.50049e-11	0.203449	0.0278407
cg21660130	chr1	16043749	16043748	rs76283532:16369772:C:G	16043277	16043277	0	1.99282e-07	-0.141124	0.0258793
cg03133876	chr1	16206496	16206495	rs72636555:16521236:A:G	16194741	16194741	0	3.75263e-09	0.458475	0.0731845
cg07925738	chr1	16521345	16521344	rs277462	16521337	16521337	0	1.40463e-25	0.373712	0.0294043
cg09507771	chr1	16613201	16613200	rs536183:17025690:C:T	16699195	16699195	0	1.43199e-08	0.268441	0.0447539
cg05208572	chr1	16701447	16701446	rs567368:17026802:C:G	16700307	16700307	0	6.67224e-11	-0.142499	0.0202607
cg09004167	chr1	16727489	16727488	rs9663015:16950346:A:C	16623851	16623851	0	1.02134e-16	-0.918221	0.0979677
cg14981532	chr1	16888983	16888982	1:17218530:A:G	16892035	16892035	0	1.88037e-07	-0.39963	0.0731181
cg17179842	chr1	16889673	16889672	rs12757283:17293892:G:A	16967397	16967397	0	5.57703e-07	0.350843	0.0670687
cg11079989	chr1	16896221	16896220	rs3928793:17213140:C:A	16886645	16886645	0	3.34945e-08	0.152345	0.0261512
cg24306142	chr1	16905299	16905298	rs34939688:17211511:C:CT	16885016	16885016	0	4.18425e-10	-0.933979	0.139638
cg24306142	chr1	16905299	16905298	exm22429	16931345	16931345	1	7.49194e-08	-1.44444	0.255235
cg18117094	chr1	16913895	16913894	rs1831373:17211220:C:A	16884725	16884725	0	3.19222e-10	-0.182324	0.0270513
cg20065512	chr1	16927937	16927936	rs35331284:17246587:AT:A	16920092	16920093	0	6.27265e-10	0.980531	0.148309
cg24791205	chr1	16935307	16935306	rs10907231:16851440:C:T	16524945	16524945	0	5.02641e-09	-0.143914	0.0231856
cg04558298	chr1	16951855	16951854	rs59177112:16831368:G:A	16504873	16504873	0	4.43647e-14	0.274884	0.0329585
cg01783960	chr1	16972046	16972045	rs116376266:17284247:A:T	16957752	16957752	0	3.68108e-22	0.77914	0.0681549
cg15590113	chr1	17116486	17116485	rs35989645:17455376:AT:A	17128881	17128882	0	2.38275e-14	0.203501	0.0240895
cg10233913	chr1	17119668	17119667	rs910223	17133360	17133360	0	1.09495e-07	0.269981	0.0483848
cg25960632	chr1	17119824	17119823	rs12130579:17443793:T:A	17117298	17117298	0	1.41837e-07	0.285968	0.0517558
cg21838303	chr1	17237463	17237462	rs2977306:17563967:T:C	17237472	17237472	0	9.78241e-12	-0.228776	0.0309768
cg26530713	chr1	153955931	153955930	rs72149705:153989995:C:CT	154017519	154017519	0	1.17209e-06	-0.069855	0.013786
cg13328788	chr1	154154613	154154612	rs199864074:153808087:A:AC	153835611	153835611	0	4.29173e-12	-2.17921	0.28924
cg05139571	chr1	154154663	154154662	rs199864074:153808087:A:AC	153835611	153835611	0	2.26613e-13	-1.88437	0.2339
cg00006626	chr1	154154987	154154986	rs199864074:153808087:A:AC	153835611	153835611	0	2.25891e-12	-1.63106	0.213228
cg03352427	chr1	154155048	154155047	rs199864074:153808087:A:AC	153835611	153835611	0	2.11734e-11	-1.28791	0.177773
cg17167920	chr1	154155062	154155061	rs199864074:153808087:A:AC	153835611	153835611	0	1.32621e-11	-1.55059	0.211537
cg17383186	chr1	154155154	154155153	rs199864074:153808087:A:AC	153835611	153835611	0	1.95295e-08	-0.888032	0.149615
cg16274678	chr1	154155477	154155476	rs199864074:153808087:A:AC	153835611	153835611	0	4.83397e-09	-1.0034	0.161455
cg19757176	chr1	154155566	154155565	rs199864074:153808087:A:AC	153835611	153835611	0	1.1891e-11	-1.04135	0.141681
cg20246707	chr1	154591554	154591553	rs36121466:154589648:C:A	154617172	154617172	0	3.62584e-08	0.137545	0.0236767
cg09359103	chr1	154867434	154867433	rs35704440:154878845:C:CT	154906369	154906369	0	1.81169e-10	-0.156389	0.0228413
cg03351412	chr1	154936776	154936775	rs4297285:154871690:T:A	154899214	154899214	0	5.39654e-10	0.152614	0.0229836
cg19352308	chr1	155033624	155033623	rs4845405:155007302:C:A	155034826	155034826	0	2.90719e-16	-0.263255	0.0286232
cg16830523	chr1	155050516	155050515	rs115165870:154303228:G:A	154330752	154330752	0	4.90659e-08	0.362361	0.0630518
cg23891169	chr1	155113681	155113680	rs11264322:155087933:G:A	155115457	155115457	0	9.57123e-17	0.25394	0.0270622
cg18157364	chr1	155236559	155236558	rs12407919:155199315:C:G	155229524	155229524	0	1.02584e-06	-0.228567	0.0448456
cg18528640	chr1	155610174	155610173	rs111951498:155678945:CT:C	155709154	155709155	0	5.36516e-09	-0.124916	0.0201669
cg06815194	chr1	155745720	155745719	rs66627415:155356352:AT:A	155386561	155386562	0	2.60449e-10	-0.314051	0.0463311
cg00504075	chr1	155857766	155857765	rs12040894:155761508:A:G	155791717	155791717	0	7.69497e-20	-0.510398	0.0483279
cg06440960	chr1	155859136	155859135	rs11578696:156056968:A:G	156087177	156087177	0	2.40705e-07	0.151682	0.0280227
cg01769968	chr1	155921454	155921453	rs61751623:154938214:C:G	154965738	154965738	0	9.33407e-07	0.236165	0.0461466
cg13550542	chr1	155934486	155934485	rs16837619:156674046:C:A	156704254	156704254	0	6.26891e-09	0.834165	0.135344
cg16848098	chr1	155934574	155934573	rs5777963:155890042:A:AAC	155920251	155920251	0	8.54788e-24	0.656403	0.0545065
cg08783638	chr1	155934957	155934956	rs61540196:155907151:C:CT	155937360	155937360	0	1.4778e-06	-0.153157	0.0305386
cg12639442	chr1	156084594	156084593	rs74965833:156054119:C:T	156084328	156084328	0	7.71618e-08	0.194187	0.0343504
cg00107970	chr1	156149667	156149666	rs536857:156111287:A:G	156141496	156141496	0	2.27267e-07	-0.0935596	0.0172456
cg24544113	chr1	156193897	156193896	rs10157319:156157258:C:T	156187467	156187467	0	1.67208e-18	0.244069	0.0242722
cg09604463	chr1	156248550	156248549	rs11389824:156306071:A:AT	156336280	156336280	0	2.12671e-11	0.245008	0.0338226
cg14500718	chr1	156281666	156281665	rs71636865:156282447:T:TAA	156312656	156312656	0	7.78263e-09	-0.146463	0.0239308
cg19759212	chr1	156336370	156336369	rs2296375:156309372:G:C	156339581	156339581	0	4.4394e-17	0.710314	0.0746765
cg07702888	chr1	156369003	156369002	rs10127551:156559659:G:A	156589867	156589867	0	5.20018e-07	0.150726	0.0287295
cg00735267	chr1	156623877	156623876	rs146098067:156586882:A:AAAAG	156617090	156617090	0	4.44162e-18	0.225466	0.0227878
cg12567310	chr1	156624052	156624051	rs146098067:156586882:A:AAAAG	156617090	156617090	0	7.87044e-10	0.551389	0.0839514
cg02289013	chr1	156661715	156661714	rs10682421:156631566:C:CAT	156661774	156661774	0	1.91447e-17	0.252395	0.0261498
cg15322801	chr1	50106272	50106271	rs4593875:50591851:G:A	50126179	50126179	0	1.09317e-07	0.0938757	0.016823
cg07174182	chr1	50661890	50661889	rs59543294:51495673:T:C	51030001	51030001	0	3.03806e-09	-0.267339	0.0423935
cg04603972	chr1	50960724	50960723	rs141543558:51942910:C:T	51477238	51477238	0	1.60656e-06	0.133807	0.0267806
cg02899037	chr1	50961475	50961474	rs145798814:51084589:C:T	50618917	50618917	0	4.08571e-07	-0.294625	0.0556016
cg10782081	chr1	51088773	51088772	rs72663117:52048969:A:G	51583297	51583297	0	2.03152e-06	-0.325091	0.0657628
cg11927626	chr1	51322281	51322280	rs77987156:51841760:C:G	51376088	51376088	0	3.10296e-17	-1.37943	0.144118
cg02451673	chr1	51518308	51518307	rs180919985:52431147:C:T	51965475	51965475	0	3.79512e-07	0.308721	0.0580865
cg17140222	chr1	51919376	51919375	rs41293271:52385081:G:A	51919409	51919409	0	3.12318e-09	-0.774193	0.122874
cg19751897	chr1	52055156	52055155	rs142834436:52520858:CACA:C	52055186	52055189	0	4.3523e-11	0.362967	0.0510337
cg23065788	chr1	52614408	52614407	rs144831947:53063384:CTT:C	52597712	52597714	1	1.48209e-06	-0.589117	0.117482
cg04527603	chr1	52726417	52726416	rs76280926:53192082:T:G	52726410	52726410	0	1.6749e-19	0.229889	0.0220332
cg10554624	chr1	52920947	52920946	rs35488175:53439017:C:CT	52973345	52973345	0	2.99052e-13	0.164464	0.0205383
cg06600287	chr1	52922048	52922047	rs36122767:53419653:CA:C	52953981	52953982	0	8.68927e-14	-0.252385	0.0306901
cg21538631	chr1	52925991	52925990	rs12566379:53249669:T:G	52783997	52783997	0	5.78827e-08	0.18733	0.0327909
cg22082456	chr1	52926867	52926866	rs35488175:53439017:C:CT	52973345	52973345	0	9.45417e-09	0.170367	0.0280141
cg05909164	chr1	52927188	52927187	rs112988376:53350982:T:TTTTTGTTTTG	52885310	52885310	0	1.89699e-28	-0.820899	0.0595458
cg24543286	chr1	52927210	52927209	rs112988376:53350982:T:TTTTTGTTTTG	52885310	52885310	0	4.23164e-27	-0.701446	0.0528232
cg12220753	chr1	52927359	52927358	rs112988376:53350982:T:TTTTTGTTTTG	52885310	52885310	0	7.71096e-27	-0.75329	0.057148
cg13685833	chr1	52927363	52927362	rs112988376:53350982:T:TTTTTGTTTTG	52885310	52885310	0	2.3785e-16	-0.779331	0.0844257
cg04310824	chr1	52927626	52927625	rs1242331:53392908:A:G	52927236	52927236	0	1.86125e-11	-0.225744	0.0310588
cg20290145	chr1	52994305	52994304	rs140655771:54229971:G:A	53764298	53764298	0	1.50927e-09	1.81745	0.282106
cg17147442	chr1	53069985	53069984	rs58924052:53565054:T:C	53099382	53099382	0	2.40506e-09	-0.231762	0.0364876
cg17127511	chr1	53080934	53080933	rs58924052:53565054:T:C	53099382	53099382	0	2.85398e-10	-0.373726	0.0552758
cg12689689	chr1	53082857	53082856	rs138759094:53502464:AT:A	53036792	53036793	0	9.81881e-09	-0.336886	0.0554646
cg15844936	chr1	53085628	53085627	rs1288397:53551293:A:G	53085621	53085621	0	2.58356e-09	-0.199077	0.031411
cg24406619	chr1	53146313	53146312	rs200683145:53619701:AT:A	53154029	53154030	0	1.19527e-06	-0.109971	0.0217218
cg11551829	chr1	53450014	53450013	rs112170557:53915383:T:A	53449710	53449710	0	4.29102e-11	-0.32431	0.0455817
cg10892335	chr1	53500646	53500645	rs61533544:53960678:TTGTG:T	53495005	53495009	0	1.62496e-10	0.123104	0.0179264
cg16733714	chr1	53853281	53853280	rs78078784:55030678:T:C	54565005	54565005	0	3.22775e-08	0.26347	0.0451678
cg25873615	chr1	53890588	53890587	rs6687200:54335640:G:A	53869967	53869967	0	1.80402e-07	-0.109372	0.019979
cg27428660	chr1	54053502	54053501	rs201851293:53601810:ACT:A	53136138	53136140	0	3.03806e-07	-0.195165	0.036392
cg24995061	chr1	54250198	54250197	rs622808:54715921:A:G	54250248	54250248	0	5.31749e-08	-0.21023	0.0366866
cg08106066	chr1	54475498	54475497	rs79711866:54941934:T:C	54476261	54476261	0	7.04338e-07	-0.122463	0.0236419
cg10613814	chr1	54668765	54668764	rs36015308:55133445:T:TA	54667772	54667772	0	9.24877e-13	-0.239253	0.0306405
cg16397644	chr1	54698650	54698649	rs644955:55168084:C:T	54702411	54702411	0	1.59228e-07	-0.141254	0.0256786
cg06221218	chr1	54764953	54764952	rs7519299:55417370:T:C	54951697	54951697	0	4.95992e-08	0.123286	0.0214604
cg20008667	chr1	54806009	54806008	rs2307949:55262958:CAT:C	54797285	54797287	0	3.99583e-10	-0.143803	0.0214717
cg22409500	chr1	54806012	54806011	rs2307949:55262958:CAT:C	54797285	54797287	0	1.21406e-11	-0.275284	0.0374731
cg17779831	chr1	54806021	54806020	rs2307949:55262958:CAT:C	54797285	54797287	0	2.01783e-09	-0.139265	0.0218077
cg11734230	chr1	54937873	54937872	rs7516855:55387039:T:G	54921366	54921366	0	4.24438e-12	-0.145071	0.0192497
cg07192718	chr1	54980165	54980164	rs200147176:55448782:G:T	54983109	54983109	0	1.23652e-16	-0.282099	0.0302011
cg14993491	chr1	55039299	55039298	rs35785163:55663826:AT:A	55198153	55198154	0	1.91711e-14	-0.510283	0.0601384
cg05118916	chr1	55039391	55039390	rs35785163:55663826:AT:A	55198153	55198154	0	1.20733e-13	-0.451734	0.0553163
cg25957967	chr1	55039476	55039475	rs35785163:55663826:AT:A	55198153	55198154	0	6.40565e-22	-0.613465	0.0540886
cg09072162	chr1	55039508	55039507	rs41294827:55531528:G:T	55065855	55065855	0	3.18383e-28	1.36507	0.0996303
cg08920610	chr1	55039671	55039670	rs372258159:55536362:GAGAAGAGAGGCTTTGACAGGGC:G	55070689	55070711	0	8.83323e-13	0.836715	0.107044
cg14752245	chr1	55040205	55040204	rs41294827:55531528:G:T	55065855	55065855	0	1.75008e-09	1.49916	0.233742
cg14752245	chr1	55040205	55040204	rs2479410:55505861:G:A	55040188	55040188	1	1.30143e-07	0.62412	0.112586
cg19249107	chr1	55040282	55040281	rs372258159:55536362:GAGAAGAGAGGCTTTGACAGGGC:G	55070689	55070711	0	6.92068e-13	2.03803	0.259299
cg14977608	chr1	55040840	55040839	rs287229:55659819:G:T	55194146	55194146	0	1.16936e-06	-0.261511	0.0516044
cg01739509	chr1	203351605	203351604	rs4971252:203320408:G:C	203351280	203351280	0	8.11585e-07	-0.147555	0.0286589
cg02244243	chr1	203661791	203661790	rs4951204:203590786:G:C	203621658	203621658	0	4.59234e-09	0.183626	0.0294988
cg07026666	chr1	204081253	204081252	rs113096683:204056113:C:T	204086985	204086985	0	1.61636e-08	-0.290352	0.0486049
cg11871090	chr1	204292943	204292942	rs5780225:204262031:CTGTTAG:C	204292903	204292909	0	6.99419e-21	0.290849	0.0265548
cg26787863	chr1	204317340	204317339	rs35245269:204280447:T:C	204311319	204311319	0	8.38085e-08	-0.134259	0.0238223
cg10118093	chr1	204493728	204493727	rs10640159:204448441:C:CCTCT	204479313	204479313	0	1.26873e-09	-0.165207	0.0255106
cg12456798	chr1	204630426	204630425	rs10793713:204607235:A:G	204638107	204638107	0	7.47352e-09	0.116256	0.0189701
cg00485540	chr1	204711909	204711908	rs10900424:204681010:C:T	204711882	204711882	0	1.88549e-09	-0.325028	0.0507917
cg06853424	chr1	204764101	204764100	1:204723593:A:AT	204754465	204754465	0	1.44963e-07	0.358045	0.0648548
cg10189817	chr1	204983406	204983405	rs187733534:205522317:A:G	205553189	205553189	0	6.49445e-08	-0.508763	0.0894294
cg00857998	chr1	205210852	205210851	1:205132347:A:AT	205163219	205163219	0	6.82458e-10	0.11684	0.0177158
cg21728107	chr1	205247858	205247857	rs370647985:205216972:G:A	205247844	205247844	0	9.06052e-07	0.385548	0.0752389
cg02716605	chr1	205269702	205269701	rs1668868:205240141:G:T	205271013	205271013	0	5.79378e-07	0.113217	0.0216775
cg13459217	chr1	205357310	205357309	rs61823092:205295907:C:T	205326779	205326779	0	9.73067e-07	0.126405	0.0247442
cg09662818	chr1	205357724	205357723	rs1857508:205327083:G:C	205357955	205357955	0	6.87753e-08	-0.163562	0.028811
cg24337829	chr1	205548599	205548598	rs11240516:205520138:A:G	205551010	205551010	0	3.08045e-07	0.111378	0.0207799
cg26605225	chr1	206511587	206511586	rs61263066:206699602:A:AGTGTGTGTGTGTGTGT	206526269	206526269	0	9.39719e-10	0.145983	0.0223424
cg19638572	chr1	206559812	206559811	rs4489558:206755867:A:G	206582535	206582535	0	2.44449e-07	-0.147709	0.0273052
cg23576477	chr1	206714366	206714365	rs4077462:206910120:G:A	206736775	206736775	0	3.1163e-08	0.381738	0.0653625
cg05245760	chr1	206922234	206922233	rs2629647:207176155:A:G	207002810	207002810	0	4.83678e-11	-0.176463	0.0248792
cg21179433	chr1	206946518	206946517	rs11119909:207129053:C:T	206955708	206955708	0	8.61831e-08	0.0936956	0.0166421
cg23916516	chr1	206985526	206985525	rs71303063:207166539:C:CA	206993194	206993194	0	5.49261e-11	-0.196841	0.0278445
cg10505247	chr1	207053131	207053130	rs77913112:206956844:G:A	206783499	206783499	0	8.97824e-07	-0.162222	0.0316448
cg00797651	chr1	207320992	207320991	rs35683092:207484091:CT:C	207310746	207310747	1	2.73808e-08	0.695503	0.11855
cg25771140	chr1	207321128	207321127	rs2782845:207474397:C:T	207301052	207301052	0	3.3025e-08	0.211092	0.0362176
cg24065395	chr1	207321384	207321383	rs2782845:207474397:C:T	207301052	207301052	0	2.66594e-07	0.170618	0.0316489
cg22078638	chr1	207322019	207322018	rs2782845:207474397:C:T	207301052	207301052	0	2.35772e-08	0.20189	0.0342347
cg19825186	chr1	207322218	207322217	rs6660557:207454596:G:C	207281251	207281251	0	4.44919e-08	0.202277	0.0350735
cg24727952	chr1	207466973	207466972	rs2661361	207404849	207404849	0	1.87181e-07	0.140517	0.0257051
cg21153881	chr1	231545350	231545349	rs201621042:231338033:A:T	231202287	231202287	0	9.9265e-08	-0.271753	0.0485233
cg10388113	chr1	231867075	231867074	rs76945478:231974202:T:G	231838456	231838456	0	8.1006e-14	0.56731	0.0688829
cg24169009	chr1	231897577	231897576	rs4649395:232763275:G:T	232627529	232627529	0	2.42581e-08	0.927337	0.157404
cg07591362	chr1	232142964	232142963	rs9660316:232253635:T:C	232117889	232117889	0	2.30293e-07	-0.171255	0.0315835
cg12077889	chr1	232568168	232568167	rs368352108:232699880:GT:G	232564134	232564135	0	8.83518e-09	0.131354	0.0215512
cg07817055	chr1	232697118	232697117	rs112412529:233015693:C:T	232879947	232879947	0	1.90778e-32	-2.38865	0.156071
cg16056164	chr1	233075827	233075826	rs74147313:233381768:C:T	233246022	233246022	0	3.46889e-08	0.87267	0.149985
cg05449874	chr1	234140267	234140266	rs12059433:234259825:G:A	234124079	234124079	0	5.15498e-12	-0.207723	0.0276917
cg10467711	chr1	234214582	234214581	rs4623775	234003835	234003835	0	1.40498e-08	-0.31248	0.0520628
cg04205689	chr1	234372746	234372745	rs149229387:234503118:GCTCTCTCTCTCTCTGT:G	234367372	234367388	0	1.49168e-08	0.253465	0.0423153
cg08166961	chr1	234377553	234377552	rs6659527:234503848:A:G	234368102	234368102	0	9.35874e-07	0.0920792	0.0179943
cg04905373	chr1	234435870	234435869	rs443685:234563060:T:C	234427314	234427314	0	3.18685e-07	0.146114	0.0272978
cg17707347	chr1	234479222	234479221	rs271744:234623253:C:T	234487507	234487507	0	4.80641e-13	-0.250206	0.0315752
cg24050135	chr1	234523802	234523801	rs509235:234660054:A:G	234524308	234524308	0	1.6215e-07	-0.0924836	0.0168244
cg07794221	chr1	235411925	235411924	rs11449267:235540971:C:CT	235377656	235377656	0	2.56907e-19	0.346557	0.0334399
cg17500055	chr1	235642261	235642260	rs10926341:235806794:A:G	235643494	235643494	0	1.09927e-09	-0.161689	0.0248611
cg19456318	chr1	235831531	235831530	rs3820555	235831567	235831567	0	6.27193e-14	-0.329377	0.0397784
cg26604618	chr1	236287922	236287921	rs149271619:236448765:G:GC	236285465	236285465	0	6.4452e-19	-0.309301	0.0302866
cg18507290	chr1	236517083	236517082	rs147563958:236675576:C:CCTTTT	236512276	236512276	0	9.72999e-12	-0.396471	0.0536759
cg21218544	chr1	236795231	236795230	rs10925266:237068826:T:G	236905526	236905526	0	5.14098e-13	0.350607	0.0443118
cg08278466	chr1	237760804	237760803	rs6143694:237924114:C:CAATGAATGGAGACATGT	237760814	237760814	0	4.07202e-23	-0.34009	0.0288472
cg17514199	chr1	237888152	237888151	rs3835532:238051188:T:TA	237887888	237887888	0	4.48885e-12	0.284857	0.0378487
cg13865695	chr1	238474804	238474803	rs2039993:238642631:T:G	238479331	238479331	0	2.00092e-09	-0.289161	0.0452685
cg03324695	chr1	238952129	238952128	rs1915269:239085483:T:C	238922183	238922183	0	1.07922e-08	0.186946	0.0308747
cg07418387	chr1	240212165	240212164	rs35339684:240398891:T:A	240235591	240235591	0	6.72752e-08	0.138028	0.0242935
cg01110790	chr1	21961434	21961433	rs10917088:22304712:A:G	21978219	21978219	0	1.55776e-07	0.1308	0.023758
cg21030858	chr1	22184905	22184904	rs10737465:22503776:T:C	22177283	22177283	0	1.16621e-09	-0.147664	0.0227445
cg07090424	chr1	22208999	22208998	rs2807323:22559930:T:C	22233437	22233437	0	5.90617e-08	-0.14579	0.0255382
cg16885277	chr1	22212429	22212428	rs34904260:22564243:GA:G	22237750	22237751	0	1.07211e-07	-0.135588	0.0242803
cg14764745	chr1	22212715	22212714	rs1569581:22547089:A:G	22220596	22220596	0	1.52282e-16	0.492546	0.052929
cg12942052	chr1	22236631	22236630	rs2807325:22563153:G:A	22236660	22236660	0	7.07063e-08	-0.131481	0.0231834
cg24834590	chr1	22448028	22448027	rs112912518:22773295:G:GA	22446802	22446802	0	1.93022e-09	-0.116718	0.0182524
cg05941864	chr1	22567486	22567485	rs66713995:22913274:G:GGGGT	22586781	22586781	0	1.82068e-14	-0.455512	0.0536273
cg15399505	chr1	22636372	22636371	rs292001:22964958:G:A	22638465	22638465	0	1.3034e-10	-0.192655	0.0278866
cg26928911	chr1	22642500	22642499	rs682658:22968815:G:T	22642322	22642322	0	2.3935e-07	-0.096308	0.0177885
cg25682112	chr1	22739916	22739915	rs72653640:23067241:C:T	22740748	22740748	0	7.03593e-08	-0.171617	0.030255
cg16262774	chr1	22888618	22888617	rs12046210:23211843:G:A	22885350	22885350	0	1.1773e-06	-0.118461	0.0233831
cg04163048	chr1	22964838	22964837	rs925826:23291090:A:G	22964597	22964597	0	6.79864e-13	0.225557	0.0286862
cg24550515	chr1	23033823	23033822	rs3972269:23334295:A:AAAAT	23007802	23007802	0	8.01049e-20	-0.374083	0.0354427
cg01439649	chr1	23084216	23084215	rs58815269:23339362:CTT:C	23012869	23012871	0	1.19836e-06	0.198885	0.0392888
cg07645741	chr1	23273541	23273540	rs148433388:24538874:T:C	24212384	24212384	0	1.1024e-06	0.175892	0.0346193
cg22502492	chr1	23371014	23371013	rs61777147:23715696:T:C	23389203	23389203	0	5.88523e-10	-0.188079	0.0283953
cg07736389	chr1	23424642	23424641	rs74706087:23829799:C:T	23503307	23503307	0	3.36586e-08	0.296468	0.0508997
cg06867363	chr1	23567901	23567900	rs6700851:23889725:T:G	23563235	23563235	0	1.23918e-07	0.0984824	0.0177323
cg10205764	chr1	23838739	23838738	rs61380582:24142578:AT:A	23816088	23816089	0	9.84075e-20	-0.210705	0.0200273
cg07813615	chr1	23840020	23840019	rs11588187:24145047:T:A	23818557	23818557	0	6.0223e-13	0.254294	0.032253
cg12626384	chr1	23868476	23868475	rs2070954:24194788:A:G	23868298	23868298	0	8.2107e-10	0.193356	0.0294758
cg01586797	chr1	23896763	23896762	rs34698652:24217235:CA:C	23890745	23890746	0	3.10907e-14	0.299134	0.0356037
cg16873748	chr1	23903609	23903608	rs55963374:24221253:C:T	23894763	23894763	0	2.6352e-09	0.195553	0.0308737
cg12569845	chr1	23951502	23951501	rs75910560:24322001:A:C	23995511	23995511	0	6.13102e-09	0.168463	0.0273137
cg03384426	chr1	23958785	23958784	rs114172431:24286885:A:G	23960395	23960395	0	1.59754e-13	-0.348789	0.0429677
cg27409662	chr1	23959053	23959052	rs140748141:24307980:GAA:G	23981490	23981492	0	1.43784e-17	0.283733	0.0292524
cg00693915	chr1	23963610	23963609	rs72540327:24288476:T:C	23961986	23961986	0	1.53233e-07	-0.206162	0.0374228
cg22358066	chr1	23970362	23970361	rs140748141:24307980:GAA:G	23981490	23981492	0	4.71794e-16	0.177171	0.0194357
cg16924704	chr1	23980774	23980773	rs75910560:24322001:A:C	23995511	23995511	0	2.80217e-14	0.269164	0.0319683
cg04021497	chr1	23980802	23980801	rs72540327:24288476:T:C	23961986	23961986	0	1.20192e-17	0.388368	0.0399177
cg19079605	chr1	24009304	24009303	1:24275460:A:AT	23948970	23948970	0	9.45713e-09	0.498528	0.0819757
cg14817175	chr1	24084268	24084267	rs6669996:24403004:T:C	24076514	24076514	0	1.46285e-11	-0.22069	0.030181
cg06296752	chr1	24155850	24155849	rs140922177:24086810:T:C	23760320	23760320	0	1.6528e-16	-1.63346	0.175791
cg27042782	chr1	24291476	24291475	rs7542749:24622610:C:T	24296120	24296120	0	3.60589e-11	0.152408	0.0213248
cg23820945	chr1	24319533	24319532	rs5773084:24642835:GA:G	24316345	24316346	0	6.26468e-08	0.0959231	0.016839
cg04238498	chr1	24329661	24329660	rs557811:24655384:T:C	24328894	24328894	0	4.06906e-19	0.366304	0.0356047
cg21857251	chr1	24337318	24337317	rs11381974:24867808:T:TA	24541318	24541318	0	5.85863e-09	-0.378924	0.0613472
cg10150518	chr1	24415188	24415187	rs144796893:24728916:ATCT:A	24402426	24402429	0	5.47594e-10	0.198064	0.0298408
cg04095045	chr1	24555709	24555708	rs6667854:24889994:C:A	24563503	24563503	0	5.02967e-07	0.100522	0.0191337
cg20433521	chr1	24556501	24556500	rs6657703:24908625:A:C	24582134	24582134	0	4.97898e-07	-0.0999476	0.0190164
cg17273683	chr1	24595241	24595240	rs146782244:24917553:AG:A	24591062	24591063	0	2.05259e-10	0.348468	0.0510704
cg05446908	chr1	24730554	24730553	rs142838832:25076811:TGGTA:T	24750320	24750324	0	5.63705e-07	-0.144209	0.02758
cg10522447	chr1	24744770	24744769	rs3029333:25049690:A:T	24723199	24723199	0	5.78977e-09	-0.210681	0.034096
cg21141264	chr1	24862421	24862420	rs2056956:25192559:A:G	24866068	24866068	0	2.88436e-07	-0.139925	0.0260372
cg14191459	chr1	25045773	25045772	rs149293740:24923019:C:T	24596528	24596528	0	2.83687e-08	-0.361208	0.0616445
cg03920750	chr1	25051200	25051199	rs416365:25350186:G:C	25023695	25023695	0	2.976e-07	0.171336	0.0319221
cg11922616	chr1	25148421	25148420	rs143646285:25474911:C:T	25148420	25148420	0	1.16531e-44	-4.21038	0.208345
cg21826606	chr1	25266565	25266564	1:25689406:A:G	25362915	25362915	0	2.42134e-24	1.27123	0.103797
cg25951697	chr1	25268017	25268016	1:25689406:A:G	25362915	25362915	0	4.4085e-22	1.77256	0.155452
cg15741663	chr1	25320452	25320451	rs55794721:25561667:G:A	25235176	25235176	0	6.72781e-10	-0.336884	0.0510584
cg13386331	chr1	25462005	25462004	rs34596921:25773708:T:TA	25447217	25447217	0	2.21131e-13	0.343029	0.0425563
cg03362483	chr1	25520198	25520197	rs71577781:25852629:ATTGTTG:A	25526138	25526144	0	1.17172e-16	-0.278027	0.0297365
cg03257180	chr1	25700255	25700254	rs184471698:26026746:G:A	25700255	25700255	0	7.03552e-21	-1.20723	0.110231
cg04980428	chr1	25771724	25771723	rs139360922:26094137:T:TC	25767646	25767646	0	2.5838e-11	-0.185253	0.0257002
cg14888636	chr1	25772041	25772040	rs71014387:26088937:CT:C	25762446	25762447	0	9.85781e-10	-0.165515	0.0253674
cg15131146	chr1	25775265	25775264	rs2280998:26108578:G:A	25782087	25782087	0	1.76147e-09	0.104878	0.0163553
cg06840154	chr1	25823264	25823263	rs55654329:26199000:ATT:A	25872509	25872511	0	9.96441e-10	-0.118456	0.0181607
cg02900990	chr1	162021823	162021822	rs10918514:161996614:C:A	162026824	162026824	0	7.65922e-07	0.314274	0.0608887
cg11169640	chr1	162362712	162362711	rs56123469:162341286:T:TAA	162371496	162371496	0	4.99855e-14	0.591428	0.0710881
cg24807394	chr1	162488370	162488369	rs61811791:162504856:C:T	162535066	162535066	0	3.21721e-07	-0.150109	0.0280549
cg09820101	chr1	162822303	162822302	rs75029947:162794437:A:T	162824647	162824647	0	4.68998e-08	0.164391	0.0285581
cg12406726	chr1	162822779	162822778	rs10799873:162815806:G:A	162846016	162846016	0	9.41119e-10	-0.200309	0.0306582
cg02885925	chr1	165356833	165356832	rs12081765	165372612	165372612	0	3.46904e-07	0.343547	0.0644038
cg25677919	chr1	165737982	165737981	rs5778470:165696836:G:GA	165727599	165727599	0	1.17485e-08	-0.210367	0.0348407
cg15224822	chr1	165769517	165769516	rs11430311:165687073:A:AT	165717836	165717836	0	2.64014e-07	0.254597	0.0472085
cg01574241	chr1	165904589	165904588	rs79244563:165172064:C:G	165202827	165202827	0	2.87719e-07	0.641478	0.119354
cg02412072	chr1	166350660	166350659	rs6680946:166329458:G:T	166360221	166360221	0	2.74219e-08	-0.150179	0.0255996
cg13725898	chr1	166838116	166838115	rs183475333:166515296:T:C	166546059	166546059	0	1.2863e-07	0.587892	0.106003
cg12850103	chr1	166974374	166974373	rs2072742:166929673:A:G	166960436	166960436	0	4.23024e-09	-0.185171	0.0296697
cg00109164	chr1	167053375	167053374	rs60547385:167021730:GC:G	167052493	167052494	0	3.12447e-22	0.495502	0.043243
cg06665322	chr1	167090129	167090128	rs4657622:167020322:A:T	167051085	167051085	0	2.20864e-07	0.177051	0.0325987
cg21693676	chr1	167118573	167118572	rs10918634:167091899:A:T	167122662	167122662	0	2.81982e-09	-0.13623	0.0215529
cg22621589	chr1	167138570	167138569	rs71594811:167111951:TATATG:T	167142714	167142719	0	1.35145e-12	0.269148	0.034769
cg12441716	chr1	168015820	168015819	rs12736786:167988283:C:G	168019045	168019045	0	1.7023e-07	0.144395	0.0263173
cg04846842	chr1	168177922	168177921	rs12728893:168115202:G:A	168145964	168145964	0	5.48725e-07	-0.150512	0.0287531
cg05393023	chr1	168225589	168225588	rs34517084:168207079:A:ATG	168237841	168237841	0	8.42918e-08	0.182025	0.0323045
cg23970458	chr1	168483959	168483958	rs10918902:168453192:A:T	168483954	168483954	0	1.02558e-13	-0.637504	0.0777936
cg00677697	chr1	168488308	168488307	rs139843636:168457959:T:TA	168488721	168488721	0	6.95023e-10	0.243336	0.0369151
cg24594348	chr1	169081868	169081867	rs146100522:169086815:G:GA	169117577	169117577	0	8.96753e-07	0.286035	0.0557943
cg12299137	chr1	169103648	169103647	1:169075857:C:CCCG	169106619	169106619	0	1.35558e-17	0.239868	0.0247051
cg21342350	chr1	169312353	169312352	rs1200153:169092825:A:C	169123587	169123587	0	4.94522e-07	0.222319	0.0422873
cg03024037	chr1	169328063	169328062	rs929133:169294976:G:T	169325738	169325738	0	2.63095e-10	-0.202608	0.0298986
cg15049744	chr1	169460816	169460815	rs34525133:169440938:A:G	169471700	169471700	0	7.38945e-09	0.131905	0.0215158
cg25256723	chr1	169586707	169586706	rs200691061:169529141:GTA:G	169559903	169559905	0	8.99065e-09	1.72893	0.283826
cg25256723	chr1	169586707	169586706	rs3766146:169817568:A:C	169848427	169848427	1	1.37825e-06	1.0202	0.202788
cg15378869	chr1	169794477	169794476	rs115234612:169849141:A:G	169880000	169880000	0	6.15838e-10	0.168372	0.0254534
cg02228073	chr1	170309804	170309803	rs11581269:170278878:T:G	170309737	170309737	0	1.7131e-07	-0.208827	0.03807
cg13910263	chr1	170591355	170591354	rs5778672:170562170:A:AT	170593029	170593029	1	1.86731e-07	-0.595247	0.10888
cg26299980	chr1	65419766	65419765	rs3838397:65877409:TG:T	65411726	65411727	0	1.35722e-08	-0.111232	0.018511
cg03514351	chr1	65526083	65526082	rs142401607:65921035:A:C	65455352	65455352	0	3.12381e-07	-0.321498	0.060016
cg16265717	chr1	65527467	65527466	rs1075473:65098136:T:C	64632453	64632453	0	8.29221e-08	-0.260882	0.0462714
cg23534774	chr1	65570612	65570611	rs76303603:66165578:T:C	65699895	65699895	0	5.6359e-08	1.27525	0.223008
cg09621235	chr1	65687955	65687954	rs78052673:66148652:T:C	65682969	65682969	0	1.04422e-13	0.209444	0.0255679
cg22733910	chr1	65791871	65791870	rs77979890:66257654:G:T	65791971	65791971	0	4.14472e-08	0.143283	0.0247816
cg09112723	chr1	66676726	66676725	rs78137332:67152483:C:G	66686800	66686800	0	3.30947e-07	0.481784	0.0901469
cg16996144	chr1	66752268	66752267	rs376427492:67152981:C:CA	66687298	66687298	0	1.77021e-09	0.154651	0.0241209
cg00044354	chr1	66924202	66924201	rs112558617:67457477:C:CT	66991794	66991794	0	4.72079e-11	-0.414138	0.0583516
cg00704590	chr1	66996378	66996377	rs139016291:67437899:C:CAT	66972216	66972216	0	3.60022e-10	0.19321	0.0287638
cg04311496	chr1	67308037	67308036	rs3977732:67773778:TTA:T	67308095	67308097	0	4.10096e-08	-0.14468	0.0250138
cg04284321	chr1	67675527	67675526	rs12124131:67940214:C:G	67474531	67474531	0	1.03102e-06	-0.276652	0.054292
cg22522961	chr1	67823135	67823134	rs115272975:69166987:G:A	68701304	68701304	0	3.30456e-08	0.542513	0.0930822
cg10178795	chr1	67832750	67832749	rs11422955:68287749:G:GA	67822066	67822066	0	5.48409e-13	0.228843	0.0289643
cg22413194	chr1	69568354	69568353	1:69975075:C:T	69509392	69509392	0	1.25664e-07	0.145716	0.0262509
cg06937997	chr1	71046418	71046417	rs9970739:71539253:T:A	71073570	71073570	0	7.59342e-08	-0.263631	0.046607
cg16014655	chr1	73749965	73749964	rs77590512:74210645:TA:T	73744962	73744963	0	2.43756e-08	-0.119238	0.0202427
cg21446242	chr1	74198144	74198143	rs67800484:74679219:TA:T	74213535	74213536	0	3.99876e-21	0.141386	0.0128022
cg07494719	chr1	74652678	74652677	rs35132035:75118230:CT:C	74652546	74652547	0	3.22798e-07	0.166558	0.0311334
cg13528603	chr1	74732985	74732984	rs79762448:75213566:CAT:C	74747882	74747884	0	7.31527e-08	0.22606	0.0399101
cg26457504	chr1	74733461	74733460	rs79762448:75213566:CAT:C	74747882	74747884	0	4.34709e-12	0.428969	0.0569531
cg20855608	chr1	74734547	74734546	rs28602706:75199973:T:C	74734289	74734289	0	6.06019e-12	0.14486	0.0193868
cg10976790	chr1	75068148	75068147	rs67297875:75595588:TTCTC:T	75129903	75129907	0	7.84396e-26	0.358094	0.0279672
cg12303627	chr1	75083573	75083572	rs184677113:75677577:T:C	75211892	75211892	0	4.51811e-14	-0.702311	0.0842387
cg19188436	chr1	75133185	75133184	rs2077678:75534827:A:G	75069143	75069143	0	1.79884e-06	-0.125359	0.0252184
cg17199271	chr1	75615355	75615354	rs6670607:76088640:C:G	75622955	75622955	0	1.71305e-06	-0.0950666	0.0190822
cg05258079	chr1	75723508	75723507	rs2761587:76149181:T:C	75683496	75683496	0	2.52237e-13	-0.198594	0.0247083
cg22875332	chr1	75724023	75724022	rs2761587:76149181:T:C	75683496	75683496	0	7.15891e-44	-0.912697	0.0459187
cg14565881	chr1	75724356	75724355	rs146231459:76405003:A:C	75939318	75939318	0	1.25884e-07	0.317045	0.0571199
cg27478651	chr1	75724744	75724743	rs79841811:76719077:G:A	76253392	76253392	0	3.27254e-07	0.105921	0.0198099
cg13421759	chr1	75786068	75786067	rs5745353:76275137:A:T	75809452	75809452	0	1.47916e-08	-0.150189	0.0250665
cg16427752	chr1	75796618	75796617	rs139017743:76156677:G:GA	75690992	75690992	0	7.01117e-08	0.207315	0.0365436
cg02161115	chr1	75796689	75796688	rs74832192:76137736:A:C	75672051	75672051	0	1.12117e-07	0.165491	0.0296851
cg08431884	chr1	75796821	75796820	rs79552201:76215497:A:T	75749812	75749812	0	7.72398e-10	0.372163	0.0566324
cg18010781	chr1	75796859	75796858	rs79552201:76215497:A:T	75749812	75749812	0	5.05315e-07	0.252916	0.0481503
cg14200364	chr1	75796910	75796909	rs139017743:76156677:G:GA	75690992	75690992	0	2.77315e-09	0.325737	0.0515082
cg22035229	chr1	75796964	75796963	rs12145334:76168496:G:A	75702811	75702811	0	4.07082e-08	0.436159	0.0753879
cg04072680	chr1	77760084	77760083	rs35944959:78056847:GT:G	77591162	77591163	0	5.56165e-15	0.166362	0.019128
cg06914015	chr1	77889155	77889154	1:78295320:A:AT	77829635	77829635	0	9.34236e-10	-0.359431	0.0550007
cg20227495	chr1	77889584	77889583	rs202137648:78355115:A:AAGTTTACGT	77889430	77889430	0	1.55691e-09	-0.370887	0.0576232
cg01014287	chr1	77979486	77979485	rs72685315:78292909:G:A	77827224	77827224	0	3.23437e-09	0.818365	0.130026
cg09148021	chr1	78004734	78004733	rs41311176:78470506:C:T	78004822	78004822	0	1.40051e-10	0.850385	0.123333
cg24795785	chr1	78004862	78004861	rs41311176:78470506:C:T	78004822	78004822	0	8.94478e-14	0.582563	0.0708833
cg09826056	chr1	78045677	78045676	rs187176672:78824395:G:T	78358711	78358711	0	1.10858e-06	0.325903	0.0641603
cg08061922	chr1	78333635	78333634	rs139650989:78778306:T:G	78312622	78312622	0	3.02621e-08	0.453848	0.0776295
cg04360793	chr1	79006677	79006676	rs228556:79650782:T:C	79185097	79185097	1	1.34801e-06	0.781545	0.155197
cg26719105	chr1	79006839	79006838	rs68145105:79584857:AT:A	79119172	79119173	0	1.23022e-16	-0.252107	0.0269877
cg01402735	chr1	79006874	79006873	rs111705965:79583134:G:GC	79117449	79117449	0	2.62526e-07	-0.179566	0.0332884
cg19532861	chr1	79124925	79124924	rs68145105:79584857:AT:A	79119172	79119173	0	2.2866e-17	-0.251438	0.0261306
cg26518660	chr1	79262924	79262923	rs150718497:79706414:A:C	79240729	79240729	0	2.61655e-12	0.422006	0.0553589
cg04353868	chr1	80218176	80218175	rs180983257:80679260:T:G	80213575	80213575	0	1.04477e-30	-1.36617	0.0933124
cg22730457	chr1	80656787	80656786	rs114610745:81159002:C:G	80693317	80693317	0	3.02434e-23	-0.819359	0.0692164
cg17879133	chr1	81143449	81143448	rs76737498:81642745:C:G	81177060	81177060	0	7.86579e-08	-0.155734	0.0275679
cg13349503	chr1	81325686	81325685	rs114688104:81817295:A:G	81351610	81351610	0	3.57915e-07	-0.107691	0.0202141
cg05512169	chr1	81557738	81557737	rs10874219:81821441:T:C	81355756	81355756	0	6.16996e-07	-0.0998545	0.0191697
cg06940482	chr1	81802497	81802496	rs3842542:82316524:CT:C	81850839	81850840	0	2.50905e-19	0.402983	0.0388699
cg09269935	chr1	4481496	4481495	rs76453659:4541660:C:T	4481600	4481600	0	7.56356e-09	0.246517	0.0402413
cg04306992	chr1	4652296	4652295	rs34642555:4694470:G:A	4634410	4634410	0	9.60865e-08	-0.153466	0.0273692
cg01982088	chr1	4654927	4654926	rs12135245:4724231:G:C	4664171	4664171	0	2.39141e-11	0.15921	0.0220439
cg23015920	chr1	4770385	4770384	rs3835205:4832143:ATTT:A	4772083	4772086	0	6.23574e-09	-0.173558	0.0281551
cg23656015	chr1	4965115	4965114	rs3128678:5025179:A:G	4965119	4965119	0	1.71845e-08	-0.148213	0.0248623
cg18036623	chr1	5239997	5239996	1:5274830:A:ATT	5214770	5214770	0	4.95205e-12	-0.301328	0.0401316
cg07199764	chr1	5287409	5287408	rs565916:5347426:A:G	5287366	5287366	0	4.90663e-18	0.42943	0.0434749
cg17548413	chr1	5800298	5800297	rs28411274:5871141:A:G	5811081	5811081	0	5.31686e-08	-0.180048	0.0314194
cg01096738	chr1	5993683	5993682	rs141175835:6052074:C:CCCA	5992014	5992014	0	3.17322e-15	-0.132937	0.0151185
cg02630629	chr1	6051612	6051611	1:5282275:TTATAGGTC:T	5222215	5222223	0	1.2647e-17	-1.19537	0.122971
cg05781512	chr1	6111621	6111620	rs78116825:6848799:C:T	6788739	6788739	0	2.19627e-07	-0.573786	0.105622
cg00389386	chr1	6128077	6128076	rs12754107:6146161:C:G	6086101	6086101	0	4.82837e-07	-0.181244	0.0344402
cg12723684	chr1	6243669	6243668	rs1775409:5719467:G:A	5659407	5659407	0	2.45383e-07	0.261091	0.0482723
cg04055049	chr1	6261494	6261493	rs6703384:6316217:A:G	6256157	6256157	0	1.27217e-06	-0.117412	0.0232556
cg14566624	chr1	6261523	6261522	rs2057006:6316884:G:C	6256824	6256824	0	1.77747e-07	-0.1407	0.0256868
cg05573161	chr1	6378309	6378308	rs149753777:6733180:T:G	6673120	6673120	0	4.13428e-08	-0.516926	0.0893973
cg00297432	chr1	6424725	6424724	rs77829738:6498162:G:T	6438102	6438102	0	6.15957e-07	0.119675	0.0229731
cg18953405	chr1	6424761	6424760	rs113844756:6497658:C:T	6437598	6437598	0	7.78584e-07	0.195065	0.0378193
cg10059687	chr1	6466070	6466069	exm9626	6473333	6473333	0	2.29551e-07	0.14761	0.0272192
cg04818845	chr1	6520108	6520107	rs58167405:6607578:GA:G	6547518	6547519	0	9.43556e-13	-0.164875	0.0211247
cg22040963	chr1	6612942	6612941	rs75995367:5768379:G:A	5708319	5708319	0	9.43535e-08	0.360719	0.0642868
cg02993722	chr1	6638398	6638397	rs11121316:6199455:C:T	6139395	6139395	0	8.44247e-07	0.198024	0.0385266
cg27642159	chr1	6806897	6806896	rs142501097:7780245:CT:C	7720185	7720186	0	8.93038e-07	-0.539662	0.105248
cg03695692	chr1	7385408	7385407	rs6577443:7476934:C:T	7416874	7416874	0	6.12809e-09	-0.261469	0.0423927
cg20681877	chr1	7461091	7461090	rs11805932	7461419	7461419	0	3.77288e-07	-0.343984	0.0647059
cg11228127	chr1	7493751	7493750	rs36208941:7559313:ATGAG:A	7499253	7499257	0	2.44716e-12	-0.22553	0.0295387
cg18862883	chr1	7668635	7668634	rs34041060:7937932:TA:T	7877872	7877873	0	1.00012e-07	-0.0828674	0.0148007
cg11633926	chr1	7671947	7671946	rs2995035:7775092:G:C	7715032	7715032	0	1.73983e-07	-0.125326	0.0228612
cg08764927	chr1	7784836	7784835	1:7856379:C:CT	7796319	7796319	0	4.1956e-07	0.168759	0.0318829
cg00019458	chr1	7827883	7827882	rs2794666:7822009:A:G	7761949	7761949	0	2.18598e-10	-0.291864	0.0428491
cg00845930	chr1	7961878	7961877	rs200968609:8021910:GGTGCTGGACGGTGTCCCT:G	7961850	7961868	0	2.42899e-26	1.04121	0.0801258
cg08027640	chr1	7961886	7961885	rs7517357:8025275:C:T	7965215	7965215	0	4.3879e-19	0.932183	0.0907174
cg10385390	chr1	7962446	7962445	rs200968609:8021910:GGTGCTGGACGGTGTCCCT:G	7961850	7961868	0	6.96161e-09	-0.162176	0.0264024
cg19295092	chr1	8031676	8031675	rs11589090:8525615:C:T	8465555	8465555	0	4.50193e-07	0.150446	0.0285055
cg19795711	chr1	8168324	8168323	rs149997714:7761132:T:C	7701072	7701072	0	1.89827e-07	0.481085	0.0880541
cg24453604	chr1	8302354	8302353	rs35288526:8361620:T:C	8301560	8301560	0	4.04944e-07	0.115096	0.0217131
cg21855467	chr1	8317363	8317362	rs139529766:8906286:C:T	8846227	8846227	0	7.39282e-07	0.322854	0.0624566
cg03281911	chr1	8438685	8438684	rs880320:8427002:C:A	8366942	8366942	0	3.63884e-07	-0.180743	0.0339491
cg00055811	chr1	8482953	8482952	rs61785830:8382403:C:G	8322343	8322343	0	5.14654e-07	-0.168905	0.0321806
cg24276315	chr1	8483177	8483176	rs34947776:8586352:CT:C	8526293	8526294	0	2.78708e-10	-0.151586	0.0224054
cg06840427	chr1	114407133	114407132	rs71580620:114991785:T:TA	114449163	114449163	0	4.00663e-18	-0.417975	0.0421721
cg25190176	chr1	114758073	114758072	rs75868777:115095171:A:C	114552550	114552550	0	9.70412e-11	0.314379	0.045146
cg14867388	chr1	115089633	115089632	rs372212159:115407843:AT:A	114865222	114865223	1	8.52976e-10	-1.67616	0.255804
cg15558982	chr1	115089642	115089641	rs1146163:115654025:C:G	115111404	115111404	0	1.6753e-13	0.334025	0.041191
cg24780648	chr1	115099595	115099594	rs184979196:115017170:T:C	114474548	114474548	0	2.42039e-18	-0.867457	0.0867939
cg04245104	chr1	115330750	115330749	rs67088159:115873351:TCACTC:T	115330730	115330735	0	2.26191e-08	-0.411238	0.0696346
cg13894908	chr1	115470051	115470050	rs112864886:115990049:C:T	115447428	115447428	0	6.55577e-07	-0.286677	0.055176
cg10290455	chr1	115768779	115768778	rs4484922:116310818:G:C	115768197	115768197	0	8.31277e-07	-0.172903	0.0336166
cg20623690	chr1	115977697	115977696	rs2452551:116519957:C:T	115977336	115977336	0	2.2128e-07	-0.199306	0.0366991
cg16942568	chr1	116018977	116018976	rs41313286:116676143:A:G	116133522	116133522	0	4.78957e-07	0.454685	0.0863713
cg03974764	chr1	116466454	116466453	rs41276566:117568093:G:T	117025471	117025471	0	2.34464e-08	-0.372143	0.0630927
cg05149108	chr1	116467560	116467559	rs1176385:117027445:T:C	116484823	116484823	0	2.96333e-07	-0.203588	0.0379247
cg15387962	chr1	116467623	116467622	rs1176386	116483534	116483534	0	4.56561e-07	-0.250704	0.0475292
cg26868111	chr1	116537754	116537753	rs148077146:117136806:G:A	116594184	116594184	0	3.20511e-19	-1.96233	0.190014
cg11527107	chr1	117339864	117339863	1:117953245:GA:G	117410623	117410624	0	2.47773e-10	0.232903	0.0343118
cg22947679	chr1	117366554	117366553	1:118001140:T:G	117458518	117458518	0	8.48741e-07	0.126411	0.0245994
cg20538800	chr1	117535376	117535375	1:117899085:A:C	117356463	117356463	0	6.70039e-10	-0.181624	0.0275237
cg25273091	chr1	118945592	118945591	rs57194612:119615776:CAAAAAAGAAAAAAA:C	119073153	119073167	0	1.27155e-07	0.118969	0.021442
cg11391335	chr1	118979306	118979305	rs200574605:119568021:G:T	119025398	119025398	0	4.74827e-10	0.276543	0.0414947
cg22378919	chr1	118979566	118979565	rs200574605:119568021:G:T	119025398	119025398	0	1.93172e-08	0.212737	0.0358284
cg05172122	chr1	118984161	118984160	rs57194612:119615776:CAAAAAAGAAAAAAA:C	119073153	119073167	0	8.13255e-09	0.167916	0.0274754
cg03760839	chr1	118989096	118989095	rs201588069:119565132:T:C	119022509	119022509	0	1.4651e-09	0.170697	0.0264721
cg14565725	chr1	118989422	118989421	rs3790553:119579276:A:G	119036653	119036653	0	4.72951e-10	0.152269	0.0228451
cg05940231	chr1	118989567	118989566	rs1886918:119536721:C:T	118994098	118994098	0	1.31815e-09	0.148798	0.023003
cg25507958	chr1	118989611	118989610	rs3790553:119579276:A:G	119036653	119036653	0	9.22698e-09	0.200822	0.0329956
cg02362103	chr1	118990151	118990150	rs188264330:119567788:T:C	119025165	119025165	0	7.9509e-07	0.169121	0.0328187
cg14204462	chr1	118997422	118997421	rs200100774:119564215:G:A	119021592	119021592	0	1.23787e-18	0.384492	0.0380495
cg25386234	chr1	118999537	118999536	rs57194612:119615776:CAAAAAAGAAAAAAA:C	119073153	119073167	0	1.26948e-08	0.168616	0.0279982
cg20247486	chr1	119001707	119001706	rs201324037:119716239:CT:C	119173616	119173617	0	6.24942e-11	0.209554	0.0297434
cg09232478	chr1	119006230	119006229	rs200100774:119564215:G:A	119021592	119021592	0	6.48246e-21	0.488364	0.0445377
cg10572355	chr1	119006523	119006522	rs148559913:119563857:A:G	119021234	119021234	0	6.68172e-14	0.259803	0.0314177
cg13933734	chr1	119007862	119007861	rs5004515:119749139:G:A	119206516	119206516	0	8.53131e-10	0.298229	0.0455139
cg03476613	chr1	119008052	119008051	rs57194612:119615776:CAAAAAAGAAAAAAA:C	119073153	119073167	0	8.25296e-08	0.110559	0.0196059
cg14609025	chr1	119008361	119008360	rs12022745:119563416:A:G	119020793	119020793	0	1.79237e-08	0.398422	0.0669297
cg09628195	chr1	119008681	119008680	rs188264330:119567788:T:C	119025165	119025165	0	3.64885e-17	0.907236	0.0950526
cg18261050	chr1	119008697	119008696	rs188264330:119567788:T:C	119025165	119025165	0	1.58663e-09	0.186015	0.0289169
cg13573036	chr1	119009229	119009228	rs200574605:119568021:G:T	119025398	119025398	0	4.12084e-11	1.04787	0.147123
cg24053992	chr1	119011942	119011941	rs6669254:119601091:C:T	119058468	119058468	0	1.53027e-06	-0.150271	0.0300101
cg13512890	chr1	119141352	119141351	rs61319010:119743011:T:A	119200388	119200388	0	1.10929e-18	0.393814	0.0389025
cg05288837	chr1	119337484	119337483	rs116411856:119701541:G:A	119158918	119158918	0	6.9793e-08	0.87887	0.154894
cg09247623	chr1	119659607	119659606	rs561931:120254506:A:G	119711883	119711883	0	8.71847e-07	-0.10947	0.0213274
cg00950384	chr1	119766306	119766305	rs10685746:120304984:A:AGG	119762361	119762361	0	1.50125e-06	0.135674	0.0270716
cg26010182	chr1	147241844	147241843	rs182893885:146833714:T:C	147362002	147362002	0	1.04564e-25	-1.45232	0.113842
cg10020892	chr1	147545132	147545131	rs656323:147017140:T:C	147545370	147545370	0	1.17586e-06	-0.180155	0.035559
cg23403636	chr1	148309105	148309104	rs539114:147807110:A:T	148334986	148334986	0	7.63369e-20	-0.439732	0.0416316
cg03951833	chr1	148328979	148328978	rs539114:147807110:A:T	148334986	148334986	0	1.84805e-10	-0.306541	0.044796
cg03102494	chr1	148329597	148329596	rs1855791:147820816:G:A	148348688	148348688	0	3.89448e-11	-0.27906	0.0391236
cg24629122	chr1	149917779	149917778	rs3738319	149843756	149843756	0	3.09994e-08	0.216177	0.0370078
cg05467523	chr1	149917993	149917992	rs201115858:149846941:A:T	149875391	149875391	0	7.60186e-09	0.247349	0.0403837
cg17353890	chr1	149936861	149936860	rs145902781:150833444:AAAG:A	150860968	150860971	0	6.59671e-07	0.331609	0.0638408
cg19320294	chr1	150257477	150257476	rs61819176:150963510:G:T	150991034	150991034	0	2.38613e-06	-0.320225	0.065261
cg02596550	chr1	150260739	150260738	rs35938158:150213828:T:C	150241470	150241470	0	1.37289e-07	-0.150273	0.0271632
cg03813961	chr1	150362860	150362859	1:150299531:C:CT	150327072	150327072	0	5.67618e-09	-0.434279	0.0702379
cg26738728	chr1	150362913	150362912	rs11584070:150294925:A:G	150322476	150322476	0	4.31955e-11	-0.465883	0.065491
cg10185505	chr1	150363021	150363020	1:150299531:C:CT	150327072	150327072	0	5.88344e-13	-1.36417	0.172933
cg10185505	chr1	150363021	150363020	rs11810447:151048964:G:A	151076488	151076488	1	4.52563e-07	-0.67706	0.128313
cg08667682	chr1	150363295	150363294	rs113035859:150353736:C:CA	150381260	150381260	0	9.14585e-09	-0.300347	0.0493336
cg09082263	chr1	150487682	150487681	rs834239:150375458:C:A	150402982	150402982	0	9.34558e-24	0.209637	0.0174288
cg03851496	chr1	150516330	150516329	rs10712406:150488722:CA:C	150516246	150516247	0	2.3582e-09	-0.123251	0.0193923
cg15441434	chr1	150925917	150925916	rs71580345:150926002:C:CA	150953526	150953526	0	2.92189e-10	0.228114	0.0337614
cg13181291	chr1	151117107	151117106	rs75645053:151880098:C:A	151907622	151907622	0	7.18903e-08	0.557617	0.0983822
cg17277896	chr1	151473066	151473065	rs144944427:151444964:CTT:C	151472488	151472490	0	1.70167e-08	-0.138578	0.0232383
cg05906443	chr1	151722096	151722095	rs12567867:151781328:A:G	151808852	151808852	0	4.15117e-07	0.154215	0.0291224
cg24153003	chr1	151764206	151764205	rs59622133:151719619:CT:C	151747143	151747144	0	4.66666e-09	0.158902	0.0255399
cg12582028	chr1	151764224	151764223	rs1196467:151710038:T:C	151737562	151737562	0	6.47416e-15	0.326265	0.0376257
cg01698998	chr1	151770194	151770193	rs6587616:151703940:C:T	151731464	151731464	0	4.15499e-07	0.106323	0.020079
cg26935976	chr1	151972710	151972709	rs34457813:151898453:AT:A	151925977	151925978	0	1.29037e-06	-0.241852	0.0479333
cg21163489	chr1	151992744	151992743	rs2337689:151936629:T:C	151964153	151964153	0	4.65032e-10	-0.185791	0.027861
cg15025200	chr1	152188762	152188761	rs146830974:152238688:G:A	152266212	152266212	0	1.04605e-11	0.333732	0.0452625
cg23107878	chr1	152188922	152188921	rs146830974:152238688:G:A	152266212	152266212	0	1.09912e-13	0.411059	0.0502348
cg26320663	chr1	152189046	152189045	rs146830974:152238688:G:A	152266212	152266212	0	3.23881e-11	0.95659	0.133477
cg09127314	chr1	152189208	152189207	rs146830974:152238688:G:A	152266212	152266212	0	6.29106e-10	0.899668	0.13609
cg02754945	chr1	152189410	152189409	rs146830974:152238688:G:A	152266212	152266212	0	5.49929e-15	0.48392	0.055628
cg13498757	chr1	152189452	152189451	rs146830974:152238688:G:A	152266212	152266212	0	2.03354e-12	1.00512	0.131077
cg21280320	chr1	152189550	152189549	rs146830974:152238688:G:A	152266212	152266212	0	1.04914e-14	0.642519	0.0748099
cg18273593	chr1	152211087	152211086	1:152210468:G:GTA	152237992	152237992	0	2.77369e-10	0.301682	0.0445845
cg13950578	chr1	152495269	152495268	rs12123907:152467751:G:A	152495275	152495275	0	4.91983e-23	0.716976	0.0609742
cg24384181	chr1	152568109	152568108	rs12081753:152593844:C:T	152621368	152621368	0	4.94094e-08	0.237786	0.0413857
cg17242116	chr1	152582712	152582711	rs111543341:152589499:A:G	152617023	152617023	0	1.07097e-07	0.198293	0.0355076
cg04982938	chr1	152585691	152585690	rs201870857:152589312:A:T	152616836	152616836	0	2.16879e-08	0.284379	0.0480841
cg12650227	chr1	152600455	152600454	rs201627679:152588246:A:G	152615770	152615770	0	9.19564e-08	-0.338766	0.0603165
cg09394134	chr1	152612391	152612390	rs6677595	152617711	152617711	0	4.15765e-13	0.744781	0.0936868
cg16789847	chr1	152614013	152614012	rs4845450:152591200:T:C	152618724	152618724	0	6.19159e-15	-0.431758	0.0497476
cg26466858	chr1	152623367	152623366	rs75196578:152588529:A:C	152616053	152616053	0	4.26427e-11	0.140414	0.019732
cg08378913	chr1	152626919	152626918	rs35655600:152599002:CT:C	152626526	152626527	0	2.15639e-30	0.744321	0.0512574
cg00204728	chr1	152662764	152662763	rs75196578:152588529:A:C	152616053	152616053	0	1.56416e-06	0.190915	0.0381645
cg24332770	chr1	152685812	152685811	rs75196578:152588529:A:C	152616053	152616053	0	6.60301e-09	0.256185	0.041636
cg22616525	chr1	152697510	152697509	rs75196578:152588529:A:C	152616053	152616053	0	4.7631e-09	0.255019	0.0410152
cg16354520	chr1	152699232	152699231	rs75196578:152588529:A:C	152616053	152616053	0	3.97311e-07	0.202428	0.0381586
cg21347427	chr1	152717235	152717234	rs80154606:152688119:T:C	152715643	152715643	0	4.44267e-07	0.544453	0.103103
cg04755954	chr1	152718822	152718821	rs6143428:152681680:C:CAGCTCTGGGGGCTGCTGT	152709204	152709204	0	1.56064e-07	0.172554	0.0313444
cg04546999	chr1	152983954	152983953	rs3737864:153029137:C:T	153056661	153056661	0	1.03519e-13	-0.386586	0.0471838
cg27653765	chr1	153348168	153348167	rs5777857:153312250:GA:G	153339774	153339775	0	1.65258e-26	-1.09962	0.084215
cg10215274	chr1	153348188	153348187	rs821410:153295136:T:G	153322660	153322660	0	1.7493e-14	-0.519901	0.0611583
cg17714793	chr1	153565956	153565955	rs2071576:153538449:C:T	153565973	153565973	0	2.22868e-07	-0.164818	0.0303572
cg09207613	chr1	153613026	153613025	rs41264642:153392663:G:A	153420187	153420187	0	1.56983e-06	-0.236934	0.0473715
cg15104031	chr1	153617053	153617052	rs56366330:153584332:G:GGTTGTGAGGTAACCC	153611856	153611856	0	2.43686e-16	-0.167436	0.0181466
cg11343894	chr1	153627229	153627228	rs36115422:153646446:CT:C	153673970	153673971	0	2.45755e-10	0.135069	0.0198941
cg27469660	chr1	153627234	153627233	rs35890519:153597117:GAA:G	153624641	153624643	0	5.68003e-11	0.164744	0.0233247
cg11915664	chr1	153627294	153627293	rs9729773:153594623:A:G	153622147	153622147	0	1.78643e-15	0.164469	0.0184991
cg01347250	chr1	153627677	153627676	rs35890519:153597117:GAA:G	153624641	153624643	0	3.08699e-16	0.216168	0.0235294
cg25741879	chr1	153783693	153783692	rs34121084:153760045:ATACT:A	153787569	153787573	0	2.13393e-07	0.166693	0.0306501
cg11757484	chr1	39669209	39669208	1:40140924:A:AG	39675252	39675252	0	9.58779e-08	-0.183496	0.032722
cg19509030	chr1	39672242	39672241	rs784597:40136070:C:G	39670398	39670398	0	4.09315e-10	-0.0961897	0.0143722
cg15901364	chr1	39689322	39689321	rs59796683:40156767:T:C	39691095	39691095	0	5.26591e-07	-0.136116	0.0259582
cg08551248	chr1	39789458	39789457	rs10158739:40183702:G:A	39718030	39718030	0	1.01188e-07	0.304587	0.0544251
cg25107984	chr1	39793031	39793030	rs34325997:40262063:AAT:A	39796391	39796393	0	7.23953e-11	-0.268603	0.0382729
cg10448144	chr1	39919273	39919272	rs142215506:40372928:AT:A	39907256	39907257	0	7.91733e-10	-0.224744	0.0342242
cg08659293	chr1	40041031	40041030	rs201693731:40495101:C:A	40029429	40029429	0	1.49214e-08	0.107012	0.0178656
cg08166631	chr1	40133340	40133339	rs112323754:40626344:CAGG:C	40160672	40160675	0	1.5954e-15	0.282969	0.0317592
cg20145692	chr1	40315618	40315617	rs111700365:40781175:CG:C	40315503	40315504	0	2.86925e-09	0.380729	0.0602674
cg01757525	chr1	40477715	40477714	rs4660167:41034811:T:C	40569139	40569139	0	1.06073e-06	0.178283	0.0350308
cg09825488	chr1	40508335	40508334	rs148588691:40942698:C:CTGAA	40477026	40477026	0	3.77591e-08	0.181353	0.0312625
cg21562355	chr1	40688712	40688711	rs12027614:41143186:C:T	40677514	40677514	0	9.2449e-10	0.12724	0.0194644
cg02442501	chr1	41163115	41163114	rs17357905:41484317:T:C	41018645	41018645	0	1.1551e-09	0.155336	0.0239194
cg22491976	chr1	41241973	41241972	rs35883594:41744093:A:G	41278421	41278421	0	4.0833e-12	0.205908	0.027297
cg19471466	chr1	41362459	41362458	rs71715635:41828124:A:AC	41362452	41362452	0	7.98961e-12	1.70474	0.229684
cg04290779	chr1	41496397	41496396	rs747460:41962029:C:G	41496358	41496358	0	3.28212e-09	-0.603609	0.0959484
cg09977515	chr1	41870977	41870976	rs783630:42346389:A:G	41880718	41880718	0	2.92899e-08	-0.214518	0.036651
cg20075528	chr1	41870982	41870981	rs783633:42350172:C:A	41884501	41884501	0	8.94613e-11	-0.337546	0.0483678
cg02031397	chr1	41917928	41917927	rs1408945:42364877:G:T	41899206	41899206	0	3.79546e-12	-0.227641	0.0301257
cg08872577	chr1	41919810	41919809	rs76730011:42146686:T:A	41681015	41681015	0	7.67495e-08	0.350574	0.062002
cg24049493	chr1	41920271	41920270	rs1998758:42386267:G:T	41920596	41920596	0	1.56256e-13	-0.247324	0.0304536
cg19728577	chr1	42153493	42153492	rs35629903:42669666:C:CA	42203995	42203995	0	6.58933e-07	-0.103944	0.0200102
cg04775750	chr1	42229081	42229080	rs12759864:42633264:A:C	42167593	42167593	0	1.8021e-07	0.127092	0.0232149
cg01990334	chr1	42335664	42335663	rs10540099:42801476:GTCTT:G	42335805	42335809	0	4.07157e-16	0.165405	0.0180957
cg12375158	chr1	42336058	42336057	rs11587973:42761260:C:T	42295589	42295589	0	1.31086e-07	-0.0886959	0.0160044
cg04353771	chr1	42463282	42463281	rs11286901:43005589:TA:T	42539918	42539919	0	7.17327e-14	0.103423	0.0125256
cg04580768	chr1	42646867	42646866	rs35170842:43106351:G:GGTCA	42640680	42640680	0	1.36931e-06	0.116511	0.0231526
cg02148318	chr1	42767177	42767176	rs55633857:43245924:CCAA:C	42780253	42780256	0	4.54897e-14	0.123675	0.0148363
cg26681016	chr1	42959254	42959253	rs76657494:43412051:G:A	42946380	42946380	0	3.18573e-09	0.748699	0.118901
cg21615440	chr1	42959267	42959266	1:43414738:CAA:C	42949067	42949069	0	8.78239e-12	-0.409001	0.0552333
cg04228516	chr1	43225388	43225387	rs613956:43682461:G:A	43216790	43216790	0	2.31072e-12	-0.347174	0.0454099
cg24464789	chr1	43285827	43285826	rs7523468:44493795:A:G	44028123	44028123	0	1.15003e-06	0.107829	0.0212624
cg24509649	chr1	43419145	43419144	rs12407785:43907092:G:A	43441421	43441421	0	2.69601e-17	-0.353019	0.0367921
cg08462360	chr1	43653439	43653438	rs56960214:45078120:C:T	44612448	44612448	0	4.08717e-07	-0.217102	0.0409722
cg12619880	chr1	43707128	43707127	rs77398040:43861086:T:G	43395415	43395415	0	6.84956e-26	1.91583	0.149369
cg03511605	chr1	43715839	43715838	rs11429972:44096568:A:ATT	43630897	43630897	0	7.93155e-09	-0.165407	0.0270427
cg23930257	chr1	43735521	43735520	rs77398040:43861086:T:G	43395415	43395415	0	3.83966e-11	-0.812713	0.113899
cg05180596	chr1	43760873	43760872	rs77398040:43861086:T:G	43395415	43395415	0	1.4258e-10	-1.04435	0.151537
cg02842833	chr1	43769727	43769726	rs374764715:44805040:GA:G	44339368	44339369	0	5.15775e-07	-1.5176	0.289167
cg11958827	chr1	43786456	43786455	rs114361356:44161275:G:A	43695604	43695604	0	4.02578e-13	-0.782528	0.0983647
cg16047291	chr1	43786913	43786912	rs114361356:44161275:G:A	43695604	43695604	0	3.95993e-10	-0.897852	0.134027
cg06322035	chr1	43800980	43800979	rs37460:44288364:C:G	43822692	43822692	0	7.21549e-08	0.158966	0.0280508
cg11837102	chr1	43804515	43804514	rs37465:44283272:T:C	43817600	43817600	0	4.99464e-07	0.122306	0.0232734
cg20452714	chr1	43933398	43933397	rs12120287:44275686:A:G	43810015	43810015	0	2.42171e-07	-0.209058	0.0386319
cg16583987	chr1	44043904	44043903	rs34522140:44520451:CT:C	44054779	44054780	0	3.4573e-07	0.172721	0.0323752
cg03221998	chr1	44101432	44101431	rs11371574:44570562:T:TA	44104890	44104890	0	1.82972e-14	-0.426418	0.0502072
cg22709362	chr1	44327909	44327908	rs34142138:44649621:CT:C	44183949	44183950	0	2.5425e-10	0.175045	0.0258066
cg21534299	chr1	44355803	44355802	rs55938620:44830070:CT:C	44364398	44364399	0	1.19863e-06	0.100999	0.0199521
cg19158567	chr1	44565527	44565526	rs72671903:45055761:C:T	44590089	44590089	0	1.08547e-08	-0.146844	0.0242565
cg02939577	chr1	44632905	44632904	1:45122683:C:CA	44657011	44657011	0	1.10116e-07	-0.114308	0.0204902
cg03044096	chr1	44675198	44675197	rs12022097:45161553:C:G	44695881	44695881	0	2.98532e-07	-0.0938093	0.0174801
cg06884882	chr1	44722275	44722274	rs188710918:45342355:C:G	44876683	44876683	0	4.99225e-07	-0.109587	0.0208527
cg21991229	chr1	44775460	44775459	rs6693615:45180125:T:C	44714453	44714453	0	5.27559e-08	0.101243	0.0176626
cg24643057	chr1	44815514	44815513	rs201524888:45401613:GT:G	44935941	44935942	0	3.8205e-12	0.211136	0.0279459
cg17140737	chr1	44821299	44821298	rs11211035:45265240:G:A	44799568	44799568	0	1.70914e-08	-0.143184	0.0240143
cg17278038	chr1	44986899	44986898	1:45437934:C:T	44972262	44972262	0	1.77344e-06	0.202619	0.0407346
cg11530175	chr1	45001074	45001073	rs34279166:45464931:TA:T	44999259	44999260	0	8.57125e-07	-0.11325	0.0220477
cg15801815	chr1	45010785	45010784	rs34579942:45492683:C:CA	45027011	45027011	0	3.68756e-22	0.195109	0.0170675
cg25481479	chr1	45012902	45012901	rs56877547:44563279:T:TA	44097607	44097607	0	1.65364e-07	0.196569	0.0357864
cg24296786	chr1	45491343	45491342	1:46007032:CAA:C	45541360	45541362	0	1.72273e-18	0.186788	0.0185848
cg26899948	chr1	45687525	45687524	rs3013594:46138000:T:C	45672328	45672328	0	3.36209e-29	0.371995	0.0264399
cg04038943	chr1	45730626	45730625	rs12022673:46119373:T:C	45653701	45653701	0	8.99523e-07	0.143868	0.0280668
cg04964007	chr1	45767440	45767439	rs111971542:46235998:A:T	45770326	45770326	0	9.20746e-08	0.21108	0.0375842
cg17517453	chr1	45803308	45803307	rs35565437:46578969:AT:A	46113297	46113298	0	1.68719e-07	-0.0973552	0.0177378
cg05450708	chr1	45923553	45923552	rs35378730:46539458:AT:A	46073786	46073787	0	1.3546e-17	-0.271987	0.0280128
cg05978555	chr1	46175081	46175080	rs35018988:46640602:C:CA	46174930	46174930	0	1.57606e-06	0.0752932	0.0150564
cg04975920	chr1	46180553	46180552	rs35803383:46232758:CAA:C	45767086	45767088	0	1.28666e-06	0.0972892	0.0192795
cg18736474	chr1	46304841	46304840	rs11590411:46804254:T:G	46338582	46338582	0	3.75629e-07	-0.200787	0.0377627
cg19323862	chr1	46339907	46339906	rs11589531:46803604:A:C	46337932	46337932	0	2.24341e-08	-0.173098	0.0293023
cg26667735	chr1	46397438	46397437	rs36170685:47459402:T:C	46993730	46993730	0	1.24259e-06	-0.247804	0.049031
cg07370093	chr1	46432674	46432673	rs6687917:46898338:A:G	46432666	46432666	0	1.32462e-08	-0.216611	0.0360187
cg08643108	chr1	46543775	46543774	rs35998093:47007262:CT:C	46541590	46541591	0	1.89898e-13	0.151858	0.0187774
cg06660332	chr1	46544036	46544035	rs4442318:47012448:T:C	46546776	46546776	0	3.2095e-08	-0.255931	0.0438665
cg23254733	chr1	46668624	46668623	rs1971519:47207997:T:C	46742325	46742325	0	1.15047e-06	0.07344	0.0144817
cg04879861	chr1	46668640	46668639	rs11403101:47099090:G:GA	46633418	46633418	0	1.76622e-07	-0.0949962	0.0173387
cg07325614	chr1	46670542	46670541	rs2218190:47130594:C:T	46664922	46664922	0	3.00063e-07	0.11134	0.0207509
cg18595867	chr1	47433541	47433540	rs6665067:47914863:C:T	47449191	47449191	0	1.36363e-08	-0.140933	0.0234575
cg13851904	chr1	47433559	47433558	rs11313296:47861661:CT:C	47395989	47395990	0	1.39229e-07	0.146505	0.0264964
cg09277376	chr1	47434005	47434004	rs60919562:47919703:C:CA	47454031	47454031	0	1.41407e-08	0.276628	0.0460993
cg06531379	chr1	47445778	47445777	rs571281:47914571:T:C	47448899	47448899	0	1.41337e-07	-0.195939	0.0354572
cg21535606	chr1	47446269	47446268	rs571281:47914571:T:C	47448899	47448899	0	7.02709e-07	-0.168828	0.0325896
cg17428085	chr1	47449337	47449336	rs12118186:47947056:G:T	47481384	47481384	0	1.37145e-06	-0.224494	0.0446137
cg18017482	chr1	47449928	47449927	rs571281:47914571:T:C	47448899	47448899	0	6.31656e-07	-0.115125	0.0221231
cg03438665	chr1	48205880	48205879	rs11205453:48671518:G:C	48205846	48205846	0	3.251e-08	-0.119364	0.0204682
cg04277893	chr1	207955640	207955639	rs34388352:208137728:A:AT	207964383	207964383	0	2.80319e-08	0.123012	0.0209847
cg11562955	chr1	208127750	208127749	rs2590690:208302115:C:T	208128770	208128770	0	5.79113e-09	-0.149185	0.0241438
cg05318391	chr1	208989123	208989122	rs12067216:209201885:T:A	209028540	209028540	0	4.09852e-09	-0.150002	0.0240107
cg14034757	chr1	209585801	209585800	1:210526783:T:G	210353439	210353439	0	8.75983e-08	0.408575	0.0726145
cg25192855	chr1	209805939	209805938	rs35314858:209980402:A:AT	209807057	209807057	0	1.22969e-09	-0.140455	0.0216682
cg22029157	chr1	209806321	209806320	rs4844949:210306846:G:A	210133501	210133501	1	2.7391e-09	0.650518	0.102826
cg14423246	chr1	209845314	209845313	rs68084857:210002837:TC:T	209829492	209829493	0	1.03717e-18	-0.315735	0.0311554
cg00494047	chr1	210213544	210213543	rs2487903:210385673:A:G	210212328	210212328	0	2.43894e-09	-0.131018	0.0206357
cg23201092	chr1	210447143	210447142	1:210623951:C:CT	210450607	210450607	0	1.23825e-06	-0.124626	0.0246549
cg10778042	chr1	210727126	210727125	lipidsMI0.0001_notinGLGC_chr1_210901241	210727899	210727899	0	8.65225e-08	-0.584349	0.103806
cg15590224	chr1	210882525	210882524	rs142700839:210841053:CA:C	210667712	210667713	0	2.21475e-11	1.77182	0.244846
cg27398908	chr1	211488722	211488721	rs367700286:211662675:TTTC:T	211489333	211489336	0	6.18665e-10	-0.19482	0.0294554
cg20681671	chr1	211518364	211518363	rs11800588:211689466:A:C	211516124	211516124	0	6.7109e-40	-1.74309	0.09557
cg09811860	chr1	211630374	211630373	rs71646136:212156175:T:C	211982833	211982833	0	2.33415e-07	-0.386676	0.07135
cg17241013	chr1	211675817	211675816	rs2794731:211868723:G:C	211695381	211695381	0	3.73326e-07	-0.0747852	0.0140616
cg14231880	chr1	211676634	211676633	rs735834:211857690:A:G	211684348	211684348	0	2.51062e-12	0.159483	0.0209007
cg03979381	chr1	211815087	211815086	rs61044318:211928892:GA:G	211755550	211755551	0	9.80398e-18	-0.427694	0.0438076
cg02900760	chr1	212087956	212087955	rs5780676:212263821:G:GA	212090479	212090479	0	5.71473e-32	-0.822015	0.0543579
cg14869070	chr1	212163032	212163031	rs111699803:212338313:CATT:C	212164971	212164974	0	1.28181e-08	-0.216197	0.0359105
cg20324481	chr1	212220133	212220132	rs11322485:212142054:GA:G	211968712	211968713	0	1.20559e-08	0.111288	0.0184472
cg11805976	chr1	212468069	212468068	rs748517:212648135:T:C	212474793	212474793	0	6.83484e-09	-0.171272	0.0278667
cg27610047	chr1	212594160	212594159	rs59930174:212763025:C:CA	212589683	212589683	0	7.80636e-07	0.117097	0.0227054
cg24590633	chr1	212791930	212791929	rs75973405:212883166:A:G	212709824	212709824	0	3.55397e-09	0.20725	0.033026
cg01785514	chr1	212815182	212815181	rs200733237:212963895:T:TG	212790553	212790553	0	1.80238e-19	0.804695	0.0772133
cg04607844	chr1	212916862	212916861	rs11120045:213023010:G:C	212849668	212849668	0	2.87249e-13	-0.183632	0.0229118
cg00108519	chr1	213947698	213947697	rs138610483:213800485:G:A	213627142	213627142	0	4.95284e-08	0.521415	0.090758
cg05052969	chr1	213983500	213983499	rs72227463:214149794:TAAA:T	213976451	213976454	0	2.64054e-09	0.184336	0.0291046
cg17560061	chr1	214188284	214188283	rs5780759:214351643:C:CACAGTT	214178300	214178300	0	1.87023e-12	-0.210543	0.0274033
cg26635762	chr1	214416710	214416709	exm148262	214641961	214641961	0	1.09028e-07	-0.877975	0.157322
cg05861821	chr1	214460701	214460700	rs34975154:214643170:C:CGG	214469827	214469827	0	3.33487e-12	0.136829	0.0180522
cg00620223	chr1	214603562	214603561	rs144142092:214751516:G:C	214578173	214578173	0	5.39641e-11	0.436309	0.0616904
cg15676720	chr1	214632301	214632300	exm148262	214641961	214641961	0	4.03764e-11	1.77713	0.249383
cg01072498	chr1	214753604	214753603	rs1779672:214922484:T:C	214749141	214749141	0	1.81298e-06	-0.133503	0.0268663
cg26547924	chr1	215083528	215083527	rs112080577:215307453:G:GA	215134110	215134110	0	6.03993e-07	-0.113008	0.0216754
cg18182483	chr1	215523829	215523828	rs4497183:215314010:C:A	215140667	215140667	0	1.11743e-06	-0.109237	0.0215129
cg09904901	chr1	241476111	241476110	rs3014579:241630488:G:C	241467188	241467188	0	6.92716e-08	-0.122661	0.021612
ch.1.4819933F	chr1	242092349	242092348	rs182224900:243082935:C:A	242919633	242919633	0	1.80455e-14	2.51997	0.296623
cg26385913	chr1	242189547	242189546	rs367744381:242352887:A:T	242189585	242189585	0	5.46526e-15	-0.446619	0.0513338
cg25006149	chr1	243508584	243508583	rs67267601:243783808:TATGTTAGCA:T	243620506	243620515	0	1.36262e-08	0.174371	0.0290224
cg18877525	chr1	244139991	244139990	rs6696761:244301114:G:A	244137812	244137812	0	4.52836e-07	0.181794	0.0344535
cg06376718	chr1	244461144	244461143	rs3006006:244624635:G:C	244461333	244461333	0	8.21611e-15	0.167983	0.0194637
cg01177928	chr1	244730270	244730269	rs6429500	244722832	244722832	0	3.74514e-10	0.178721	0.0266364
cg16910115	chr1	244834863	244834862	rs72762811:245618170:A:C	245454868	245454868	0	2.86771e-09	0.340236	0.0538568
cg06992877	chr1	244970195	244970194	rs7545078:245133489:T:G	244970187	244970187	0	1.39907e-13	0.252363	0.0310004
cg08289927	chr1	245043715	245043714	rs140218267:245129294:CA:C	244965992	244965993	0	4.86089e-08	-0.190277	0.0330975
cg17094624	chr1	245091366	245091365	rs140218267:245129294:CA:C	244965992	244965993	0	6.12531e-10	0.184199	0.0278416
cg12093781	chr1	245260215	245260214	rs4658732:245418431:C:G	245255129	245255129	0	2.87292e-10	0.143424	0.021217
cg16178225	chr1	245442008	245442007	rs111711836:245615154:G:A	245451852	245451852	0	2.02317e-08	-0.156077	0.0263275
cg16173868	chr1	245486287	245486286	rs5782348:245649675:T:TA	245486373	245486373	0	4.47885e-10	-0.215968	0.0323516
cg16048841	chr1	245616422	245616421	rs12043178:245779974:C:A	245616672	245616672	0	2.70797e-21	-0.359663	0.0323806
cg12313916	chr1	245694816	245694815	rs10802245:245858321:G:A	245695019	245695019	0	2.60564e-11	-0.192974	0.0267771
cg14783303	chr1	246066773	246066772	rs74163465:246756621:CT:C	246593319	246593320	0	6.6626e-08	-0.186422	0.0327995
cg08188060	chr1	246398336	246398335	rs200584303:246572959:G:A	246409657	246409657	0	1.71364e-10	0.13286	0.0193752
cg08920545	chr1	246619840	246619839	rs139351558:246770276:TTAG:T	246606974	246606977	0	2.54758e-37	-0.353972	0.0205736
cg09465560	chr1	246689824	246689823	rs141299909:246837142:C:CA	246673840	246673840	0	3.68837e-07	-0.0972853	0.0182832
cg05157272	chr1	246698955	246698954	rs61202512:246860213:A:C	246696911	246696911	0	4.49725e-07	0.110766	0.0209862
cg27515966	chr1	246699419	246699418	rs3007305:246862572:C:G	246699270	246699270	0	7.13741e-09	-0.172588	0.0281202
cg23255020	chr1	246776106	246776105	rs11487714:246439762:G:T	246276460	246276460	0	8.09291e-08	-0.100572	0.0178219
cg10580682	chr1	246798189	246798188	rs71638369:246960110:C:T	246796808	246796808	0	3.78882e-08	-0.134258	0.0231468
cg09687621	chr1	246885458	246885457	rs1039009:247080458:C:A	246917156	246917156	0	3.03107e-07	0.135951	0.0253481
cg25924377	chr1	246900841	246900840	rs2642990:247048834:T:C	246885532	246885532	0	3.43613e-26	-0.527953	0.0408056
cg18126557	chr1	247448541	247448540	rs60418626:247611981:TC:T	247448679	247448680	0	9.52288e-16	0.716877	0.0796779
cg25602756	chr1	247448580	247448579	rs112008153:247611313:CT:C	247448011	247448012	1	6.41822e-10	0.944334	0.142929
cg08156039	chr1	247506945	247506944	rs189777364:247713819:A:G	247550517	247550517	0	1.09277e-07	0.852172	0.152711
cg12689806	chr1	247878984	247878983	rs12062001:247594514:A:T	247431212	247431212	0	8.29123e-07	-0.217007	0.0421869
cg15595212	chr1	247936882	247936881	rs61857507:248100548:G:C	247937246	247937246	0	6.57869e-07	-0.237411	0.0457008
cg20433858	chr1	247937708	247937707	rs61857507:248100548:G:C	247937246	247937246	0	1.44209e-10	-0.529647	0.0768766
cg09598075	chr1	248111458	248111457	rs77795510:248547333:T:C	248384032	248384032	0	4.91356e-07	0.188789	0.0359
cg22724847	chr1	248349285	248349284	rs182574054:248567484:C:T	248404183	248404183	0	1.98026e-09	-0.391236	0.0612291
cg18146194	chr1	248386255	248386254	rs61832914:248546517:T:C	248383216	248383216	0	7.20784e-10	0.315608	0.0479297
cg06846214	chr1	248386371	248386370	rs7516127:248519280:A:G	248355978	248355978	0	2.28644e-06	0.185556	0.0377411
cg02077084	chr1	248386641	248386640	1:248545833:C:T	248382532	248382532	0	1.40604e-10	0.170083	0.02467
cg03764335	chr1	248405357	248405356	rs11485458:248569050:A:G	248405749	248405749	0	2.15937e-09	0.389672	0.0611458
cg00106419	chr1	248438550	248438549	1:248545833:C:T	248382532	248382532	0	1.2269e-11	0.795556	0.108324
cg00106419	chr1	248438550	248438549	rs202243233:248807548:A:AC	248644247	248644247	1	6.6679e-08	0.707984	0.124568
cg26621945	chr1	248446521	248446520	rs77795510:248547333:T:C	248384032	248384032	0	4.88037e-10	0.206959	0.0310782
cg05943574	chr1	248522082	248522081	rs7516127:248519280:A:G	248355978	248355978	0	1.08807e-08	0.117247	0.019369
cg26570714	chr1	248592851	248592850	1:248545833:C:T	248382532	248382532	0	2.43946e-10	0.304853	0.0448923
cg03213204	chr1	248595149	248595148	rs946761	248357730	248357730	0	4.38978e-10	0.251058	0.0375865
cg14976054	chr1	248596145	248596144	rs28735673:248858535:T:G	248695234	248695234	0	2.29549e-09	0.332455	0.0522653
cg18315861	chr1	248626676	248626675	rs6587471:248560741:G:A	248397440	248397440	0	2.12827e-09	0.359966	0.0564594
cg17514168	chr1	248627197	248627196	rs72770905:248895812:C:G	248732511	248732511	0	1.06462e-10	0.31002	0.0446308
cg00821186	chr1	248627681	248627680	exm168201	248406068	248406068	0	6.53215e-08	0.185658	0.0326415
cg19357275	chr1	248691740	248691739	rs946761	248357730	248357730	0	1.79258e-06	0.179913	0.0361874
cg17759806	chr1	248691888	248691887	rs6666670:248603087:C:A	248439786	248439786	0	3.98253e-08	-0.219176	0.037854
cg06284449	chr1	248722796	248722795	rs4364913:248515635:C:A	248352333	248352333	0	9.89837e-07	0.140147	0.0274545
cg13993760	chr1	248794083	248794082	rs140329919:248520080:G:GACACAC	248356778	248356778	0	9.09713e-11	0.20002	0.0286741
cg04157864	chr1	248807118	248807117	rs3033624:248808299:C:CTATT	248644998	248644998	0	3.28357e-07	0.135762	0.0253945
cg12805491	chr1	25872231	25872230	rs12744951:26332229:A:G	26005738	26005738	0	5.03457e-28	-2.50567	0.183883
cg11887554	chr1	26170821	26170820	rs8768:26497340:A:C	26170849	26170849	0	4.27779e-08	-0.105554	0.0182767
cg07084796	chr1	26172072	26172071	rs2783626:26501044:A:G	26174553	26174553	0	1.67087e-07	-0.157989	0.0287742
cg08853451	chr1	26220887	26220886	rs7517584:26525667:A:G	26199176	26199176	0	1.64295e-07	-0.19046	0.0346655
cg12744634	chr1	26233813	26233812	rs35582967:26530819:CT:C	26204328	26204329	0	3.43383e-07	0.0935961	0.0175389
cg24565143	chr1	26307024	26307023	rs149847106:26569802:GTCTTGGTTGA:G	26243311	26243321	0	4.48713e-09	0.174628	0.0280327
cg08572767	chr1	26317744	26317743	rs141131115:26613786:GCCT:G	26287295	26287298	0	4.09466e-12	-0.217422	0.0288254
cg09649799	chr1	26336751	26336750	rs35587689:26666232:C:CA	26339741	26339741	0	1.29504e-06	-0.161937	0.0320999
cg24410607	chr1	26436325	26436324	rs71680492:26757610:CTAAA:C	26431119	26431123	0	8.51146e-08	0.186047	0.0330301
cg10433052	chr1	26469046	26469045	rs34660239:26969118:C:T	26642627	26642627	0	5.97324e-07	0.147755	0.0283268
cg05304531	chr1	26471086	26471085	rs112981439:26842602:A:AT	26516111	26516111	0	2.79939e-06	0.100192	0.0205718
cg26108329	chr1	26471095	26471094	rs4659374:26779270:C:T	26452779	26452779	0	3.4031e-07	-0.127118	0.0238119
cg19008222	chr1	26621341	26621340	rs182426035:26923124:A:G	26596633	26596633	0	3.01868e-10	0.240277	0.0355939
cg12136895	chr1	26781695	26781694	rs59479684:27255904:CA:C	26929413	26929414	0	8.81566e-07	-0.169667	0.0330711
cg20156498	chr1	26788786	26788785	exm35772	26952082	26952082	0	1.10985e-07	0.335116	0.0600887
cg03129904	chr1	26789137	26789136	rs36053809:27083093:A:C	26756602	26756602	0	1.18902e-08	0.484083	0.0802054
cg14289658	chr1	26921328	26921327	exm34644	26344290	26344290	0	1.3695e-08	-0.914322	0.152206
cg06419258	chr1	26993613	26993612	rs7513495:27192462:G:C	26865971	26865971	0	1.18176e-06	-0.100964	0.0199326
cg12465678	chr1	27626826	27626825	rs138549125:27384524:C:T	27058033	27058033	0	9.90443e-09	0.737728	0.121493
cg04167126	chr1	28155883	28155882	rs139647844:28204128:A:G	27877617	27877617	0	5.48233e-14	-3.44031	0.414313
cg11975685	chr1	28246902	28246901	rs5773213:28533579:GA:G	28207068	28207069	0	9.30197e-23	0.463205	0.039742
cg07913096	chr1	28247430	28247429	rs7518571	28224939	28224939	0	2.31448e-15	0.269363	0.0304481
cg15374471	chr1	28248660	28248659	rs112339306:28560136:C:CT	28233625	28233625	0	1.23913e-09	0.108541	0.0167487
cg17457884	chr1	28370147	28370146	1:28704850:T:TA	28378339	28378339	0	2.52599e-08	-0.0934734	0.0158882
cg00956142	chr1	28438521	28438520	rs59368965:28705782:C:CT	28379271	28379271	0	6.14696e-10	0.21236	0.0321014
cg20985980	chr1	28505602	28505601	rs7530139:28890056:C:T	28563544	28563544	0	6.07978e-09	0.555747	0.0900816
cg15161854	chr1	28509628	28509627	rs41284311:28530167:C:T	28203656	28203656	0	3.58965e-08	-0.59115	0.101723
cg02772605	chr1	28585812	28585811	rs61786023:28912324:G:A	28585812	28585812	0	8.59414e-28	-2.09794	0.154954
cg13430534	chr1	28668189	28668188	rs71027288:29022553:ATTGT:A	28696041	28696045	0	1.36535e-09	0.106954	0.0165516
cg03375056	chr1	28735920	28735919	rs79754757:28400798:T:C	28074287	28074287	0	1.26097e-07	-0.415848	0.0749254
cg22861340	chr1	28775338	28775337	rs11316891:29002191:CA:C	28675679	28675680	0	2.3291e-15	-0.293033	0.0331276
cg11226328	chr1	28886856	28886855	1:29207127:C:CA	28880615	28880615	0	5.28662e-08	0.202639	0.0353546
cg10846285	chr1	29182077	29182076	1:28680011:G:A	28353500	28353500	0	4.84559e-07	0.208756	0.039674
cg03131236	chr1	29217701	29217700	rs139233377:29535724:ACTTACC:A	29209212	29209218	0	8.05644e-07	-0.262421	0.0509527
cg02065032	chr1	171154164	171154163	rs148827873:170486553:T:A	170517412	170517412	0	2.45275e-29	-2.71339	0.19215
cg09423316	chr1	171248584	171248583	kgp6353310	171248552	171248552	0	3.72654e-31	-1.38664	0.0936208
cg00457082	chr1	171621667	171621666	rs7524991:171594588:G:A	171625448	171625448	0	3.46876e-14	-0.207472	0.0247496
cg13446689	chr1	172359238	172359237	rs56345174:172433784:GTT:G	172464644	172464646	0	1.41605e-07	-0.125634	0.0227364
cg27274143	chr1	172583207	172583206	rs11340278:172471071:TC:T	172501931	172501932	0	1.93862e-08	-0.495381	0.0834403
cg11721910	chr1	172775778	172775777	rs1476423:172744934:C:T	172775794	172775794	0	7.91939e-10	0.18943	0.0288468
cg06349264	chr1	173136911	173136910	rs201627737:173108839:C:CTT	173139700	173139700	0	2.05735e-09	-0.180763	0.0283228
cg11461633	chr1	173503485	173503484	rs35846760:173446338:A:AGCCCC	173477199	173477199	0	1.5244e-06	0.145782	0.0291085
cg20829055	chr1	173827362	173827361	rs138958461:174102716:G:A	174133578	174133578	0	1.18229e-24	-1.85951	0.150402
cg12958175	chr1	174447909	174447908	rs114622977:173841361:C:T	173872223	173872223	0	9.82187e-18	-1.10799	0.113492
cg04076488	chr1	174700026	174700025	rs76562106:174883270:C:G	174914133	174914133	0	2.85064e-10	-0.990668	0.14652
cg07174997	chr1	174744494	174744493	rs61539169:174898890:A:AAAAT	174929753	174929753	0	1.22625e-08	-0.247337	0.0410222
cg20254763	chr1	175153695	175153694	rs3766694:175143207:T:C	175174071	175174071	0	4.54429e-07	-0.152606	0.0289259
cg05404729	chr1	175193200	175193199	rs10912903:175161930:C:G	175192794	175192794	0	1.94931e-15	-0.162767	0.0183383
cg18864179	chr1	175221819	175221818	rs4651391:175182636:C:T	175213500	175213500	0	1.78736e-06	0.181413	0.0364842
cg02222678	chr1	175314457	175314456	rs12566648:175282246:G:C	175313110	175313110	0	1.21799e-06	0.083847	0.0165754
cg23517301	chr1	175718946	175718945	rs4565663	175740035	175740035	0	7.91911e-07	-0.116974	0.0226954
cg13983442	chr1	176205230	176205229	rs35212492:176248866:A:G	176279730	176279730	0	2.31924e-08	-0.142683	0.0241812
cg07330518	chr1	176878096	176878095	rs2076339	176876250	176876250	0	5.6271e-07	0.140148	0.0268013
cg02102020	chr1	177181654	177181653	rs59614546:177156370:C:T	177187234	177187234	0	1.76807e-13	0.604737	0.0746612
cg08733291	chr1	178005015	178005014	rs12564334:177972616:T:C	178003481	178003481	0	3.94937e-22	0.286973	0.025128
cg26004771	chr1	178486959	178486958	rs147497122:178453840:G:GC	178484705	178484705	0	1.11981e-11	-0.434016	0.0589627
cg07196927	chr1	178614660	178614659	rs2761466:178583718:C:T	178614583	178614583	0	3.0754e-14	-0.651848	0.0775672
cg19256210	chr1	179085746	179085745	rs183541668:179664414:A:G	179695279	179695279	0	1.14289e-06	0.600344	0.118348
cg16874812	chr1	179591497	179591496	rs9286930:179522221:A:G	179553086	179553086	0	1.46803e-09	-0.190625	0.0295644
cg13848905	chr1	179591566	179591565	rs7546703:179523072:G:A	179553937	179553937	0	1.5363e-10	-0.213702	0.0310716
cg06656994	chr1	179744042	179744041	rs2454193:179712616:G:T	179743481	179743481	0	5.53103e-07	0.112761	0.0215483
cg16273296	chr1	179771587	179771586	rs181711918:179877233:C:T	179908098	179908098	0	2.93968e-12	-0.671646	0.0883486
cg02664390	chr1	179942750	179942749	rs66713090:179900915:TA:T	179931780	179931781	0	3.69368e-15	-0.479401	0.0546818
cg08569016	chr1	180154657	180154656	rs7531169:180123812:A:G	180154677	180154677	0	1.84862e-08	0.132381	0.0222617
cg08812504	chr1	180154664	180154663	rs7531169:180123812:A:G	180154677	180154677	0	5.37353e-10	0.111839	0.0168408
cg02084211	chr1	180187018	180187017	rs3753800:180140508:T:C	180171373	180171373	0	8.89819e-20	0.386481	0.0366772
cg11189384	chr1	180235245	180235244	rs11305552:180206349:CG:C	180237214	180237215	0	2.38541e-13	0.183445	0.0227958
cg06972794	chr1	180236134	180236133	rs357069:180221084:T:C	180251949	180251949	0	7.27292e-07	0.133723	0.025851
cg05364139	chr1	82903115	82903114	rs12118538:84321116:C:T	83855433	83855433	0	1.19347e-06	0.156305	0.0308718
cg03681926	chr1	83860503	83860502	rs12142059:84330527:T:C	83864844	83864844	0	5.3997e-16	0.603055	0.0663209
cg10806543	chr1	83860676	83860675	rs199913889:84389221:AAC:A	83923538	83923540	0	3.67133e-10	0.698869	0.1041
cg14790630	chr1	83860780	83860779	rs199913889:84389221:AAC:A	83923538	83923540	0	3.01276e-09	0.816267	0.129407
cg07807165	chr1	83860928	83860927	rs199913889:84389221:AAC:A	83923538	83923540	0	1.52693e-14	0.983813	0.115413
cg26347197	chr1	83860987	83860986	rs116385455:84407253:G:T	83941570	83941570	0	1.29546e-09	1.73403	0.267929
cg26347197	chr1	83860987	83860986	rs663521:84530053:T:G	84064370	84064370	1	1.24944e-07	0.633964	0.114185
cg02483449	chr1	83861174	83861173	1:84524627:C:T	84058944	84058944	0	2.45862e-13	0.807225	0.100376
cg23052793	chr1	84082273	84082272	rs199579122:84536514:CACAA:C	84070831	84070835	0	8.30807e-07	-0.225298	0.0438025
cg13469748	chr1	84506228	84506227	rs115455099:85542289:G:A	85076606	85076606	0	8.95109e-08	0.330567	0.0587976
cg22519756	chr1	84574572	84574571	rs201206476:84981938:C:CA	84516255	84516255	0	2.11679e-09	0.43731	0.0685792
cg22780859	chr1	84635648	84635647	rs10874453:85103107:T:C	84637424	84637424	0	6.84759e-07	-0.084951	0.0163805
cg10585586	chr1	84896438	84896437	rs35999179:85388878:C:A	84923195	84923195	0	9.48026e-08	-0.205939	0.0367087
cg18076721	chr1	84960880	84960879	rs9726410:85283572:C:T	84817889	84817889	0	8.35464e-07	-0.132519	0.0257707
cg24810550	chr1	84999074	84999073	rs202103621:85492540:C:CT	85026857	85026857	0	2.93737e-07	0.15712	0.0292581
cg15233622	chr1	85417249	85417248	rs200099269:85909093:T:C	85443410	85443410	0	1.99248e-12	-0.264707	0.0345039
cg23398028	chr1	85885237	85885236	rs35158341:86348273:GT:G	85882590	85882591	0	4.21248e-12	-0.390631	0.0518241
cg16800405	chr1	86704802	86704801	rs150955408:87167246:T:C	86701563	86701563	0	2.80129e-10	0.647251	0.0956814
cg13784611	chr1	86915273	86915272	rs41296175:87573914:A:T	87108231	87108231	0	4.73009e-09	0.278469	0.0447769
cg24413727	chr1	86945618	86945617	rs526600:87366597:T:A	86900914	86900914	0	2.35499e-16	1.58009	0.171142
cg12687112	chr1	87151161	87151160	rs28533273:87641352:T:C	87175669	87175669	0	8.41431e-10	-0.159624	0.024351
cg04246763	chr1	87152129	87152128	rs59728434:87641496:C:CA	87175813	87175813	0	1.44807e-07	0.192761	0.0349145
cg11969144	chr1	87332002	87332001	rs59728434:87641496:C:CA	87175813	87175813	0	2.31999e-08	-0.152329	0.0258162
cg01552197	chr1	87903205	87903204	rs12747005:88373964:T:C	87908281	87908281	0	1.02053e-11	-0.421705	0.0571592
cg11770675	chr1	88663201	88663200	rs11463292:89126179:C:CA	88660496	88660496	0	4.97174e-19	0.410947	0.0400722
cg07230209	chr1	88698355	88698354	rs35282314:89214454:C:CA	88748771	88748771	0	1.09985e-06	-0.104741	0.0206132
cg12557374	chr1	88731486	88731485	rs9729118:89183098:A:G	88717415	88717415	0	1.45872e-10	0.375414	0.0545071
cg19543911	chr1	88993103	88993102	1:89475929:T:C	89010246	89010246	0	2.11997e-08	0.122203	0.0206465
cg21341297	chr1	88994215	88994214	rs68075525:89476440:TCTCC:T	89010757	89010761	0	1.41091e-08	-0.287209	0.0478591
cg01355374	chr1	89065343	89065342	rs34200673:89553605:CT:C	89087922	89087923	0	1.14532e-09	-0.131977	0.0203174
cg02482460	chr1	89198656	89198655	rs631194:89699347:C:T	89233664	89233664	0	6.04839e-08	-0.220013	0.0385733
cg02420133	chr1	89364423	89364422	rs12758062:89832948:T:C	89367389	89367389	0	1.27606e-07	-0.116549	0.0210086
cg21839260	chr1	89455341	89455340	rs716749:89930684:A:T	89465125	89465125	0	3.97076e-10	0.228066	0.0340471
cg07998124	chr1	89794601	89794600	rs200520887:90263430:A:G	89797871	89797871	0	2.13239e-10	-0.148523	0.02179
cg10463708	chr1	89843647	89843646	rs11288741:90317556:AT:A	89851997	89851998	0	1.29924e-06	0.209392	0.0415125
cg04436714	chr1	89843660	89843659	rs10922736:90321893:T:A	89856334	89856334	0	7.85555e-08	0.236141	0.0417994
cg17256681	chr1	89879157	89879156	rs141510971:91291849:A:G	90826292	90826292	0	2.55263e-10	-1.47099	0.21689
cg18618195	chr1	90127986	90127985	rs10922762:90571911:A:T	90106353	90106353	0	1.84974e-07	0.383719	0.0701622
cg15552484	chr1	90476038	90476037	rs34753456:91080633:A:AC	90615076	90615076	0	1.97715e-12	-0.177587	0.0231437
cg20221345	chr1	90615058	90615057	rs11455048:90926503:A:AT	90460946	90460946	0	1.13155e-06	0.160842	0.0316935
cg22167515	chr1	90726910	90726909	rs12568187:91193691:T:C	90728134	90728134	0	3.67405e-07	0.258089	0.048496
cg05667744	chr1	91165766	91165765	rs365788:91629937:G:C	91164380	91164380	0	3.83096e-07	-0.136356	0.0256656
cg07134725	chr1	91450042	91450041	rs34873178:91904007:AT:A	91438450	91438451	0	5.71099e-08	0.190186	0.0332745
cg11705954	chr1	91546176	91546175	rs71087958:92001593:A:AT	91536036	91536036	0	7.86392e-09	-0.288785	0.0472009
cg20353881	chr1	92754499	92754498	rs35466815:93103390:C:CA	92637833	92637833	0	2.34005e-10	-0.249705	0.0367289
cg05036103	chr1	92950354	92950353	rs35992170:93378500:A:T	92912943	92912943	0	2.48147e-10	-0.177682	0.0261777
cg23964342	chr1	93039028	93039027	rs4626900:93486444:A:C	93020887	93020887	0	3.93204e-07	-0.134328	0.0253108
cg09936581	chr1	93079174	93079173	rs143716815:93597907:GA:G	93132350	93132351	0	4.07681e-11	0.09665	0.0135661
cg02237208	chr1	2319087	2319086	rs2843142:2270098:A:G	2338659	2338659	0	1.02814e-06	-0.129278	0.0253672
cg12936238	chr1	2323144	2323143	rs2843149:2254516:G:A	2323077	2323077	0	5.41249e-08	-0.213621	0.0373021
cg13865934	chr1	2331036	2331035	rs12757417:2271674:T:C	2340235	2340235	0	2.38735e-08	0.0930418	0.015784
cg10238603	chr1	2406437	2406436	rs4648838:2329212:G:A	2397773	2397773	0	8.65024e-10	-0.6587	0.100568
cg11596239	chr1	2418621	2418620	rs3935659	2420260	2420260	0	1.20498e-06	0.111805	0.022092
cg07552569	chr1	2466766	2466765	rs2494635:2395068:A:C	2463629	2463629	0	3.90487e-14	-0.211848	0.0253333
cg17008066	chr1	2466962	2466961	rs2494635:2395068:A:C	2463629	2463629	0	1.43307e-08	-0.107444	0.0179132
cg16578609	chr1	2467613	2467612	rs2494635:2395068:A:C	2463629	2463629	0	1.57329e-19	-0.225518	0.0215931
cg05888192	chr1	2468253	2468252	rs2494632:2399119:A:G	2467680	2467680	0	4.58434e-17	-0.568663	0.0598182
cg20739281	chr1	2479802	2479801	rs2494631:2399149:A:G	2467710	2467710	0	1.57184e-08	-0.159177	0.0266211
cg17918280	chr1	2479940	2479939	rs61277936:2390715:C:G	2459276	2459276	0	1.49591e-08	-0.179027	0.0298909
cg19760917	chr1	2480205	2480204	rs61277936:2390715:C:G	2459276	2459276	0	7.28061e-11	-0.18048	0.0257202
cg03722487	chr1	2483761	2483760	rs7512269:2418625:C:T	2487186	2487186	0	3.73342e-13	0.39594	0.0496873
cg08039751	chr1	2493218	2493217	rs16824399:2391367:G:A	2459928	2459928	0	9.56639e-10	-0.162784	0.0249269
cg19371189	chr1	2497621	2497620	rs61277936:2390715:C:G	2459276	2459276	0	9.58829e-07	-0.131923	0.0258077
cg11854493	chr1	2498558	2498557	rs35886181:2391491:G:A	2460052	2460052	0	2.09675e-07	-0.10306	0.0189367
cg12053769	chr1	2529975	2529974	rs55780582:2400534:C:T	2469095	2469095	0	1.19447e-10	-0.20796	0.030031
cg21621858	chr1	2592842	2592841	rs6687492:2614953:A:C	2683514	2683514	0	1.22972e-06	-0.129169	0.0255458
cg05874270	chr1	2628455	2628454	rs79793581:2559734:G:T	2628295	2628295	0	3.57252e-10	0.455923	0.0678598
cg03709938	chr1	2629512	2629511	rs201235538:2553011:A:AT	2621572	2621572	0	1.61112e-07	0.11073	0.0201387
cg04563718	chr1	2634339	2634338	rs6687492:2614953:A:C	2683514	2683514	0	2.29871e-08	0.116761	0.019782
cg17429686	chr1	2639791	2639790	rs28707614:2626261:A:G	2694822	2694822	0	3.3608e-12	-0.157002	0.0207176
cg05697835	chr1	2806247	2806246	rs200553981:2508343:G:C	2576904	2576904	0	1.03733e-10	-0.10974	0.0157873
cg13923696	chr1	2855648	2855647	rs61763682:2768891:T:G	2852326	2852326	0	7.81743e-12	-0.220373	0.0296757
cg06988547	chr1	2923199	2923198	rs115331661:2839788:G:C	2923223	2923223	0	8.8582e-07	-0.226917	0.0442392
cg06991974	chr1	3067655	3067654	rs12035836:2248624:A:C	2317185	2317185	0	4.88313e-07	-0.148764	0.0282816
cg07363855	chr1	3067907	3067906	rs12081179:2251119:A:G	2319680	2319680	0	2.59838e-07	0.136571	0.0253075
cg17489690	chr1	3219770	3219769	rs61520104:2838056:A:G	2921491	2921491	0	3.36912e-07	-0.427821	0.0801077
cg23631759	chr1	3227119	3227118	rs10492941:3127137:C:A	3210573	3210573	0	6.83783e-08	0.227855	0.0401274
cg03844268	chr1	3267624	3267623	rs71630976:2322726:G:A	2391287	2391287	0	3.43467e-07	0.296514	0.0555643
cg14659814	chr1	3293347	3293346	1:3213844:ATT:A	3297280	3297282	0	1.90787e-07	0.145181	0.026578
cg17435683	chr1	3314046	3314045	rs79749978:3234448:T:C	3317884	3317884	0	8.43563e-08	-0.412387	0.0731895
cg23713146	chr1	3453446	3453445	rs55860810:3397836:G:A	3481272	3481272	0	5.65343e-08	0.28198	0.0493166
cg16097329	chr1	3468264	3468263	rs34109718:3382158:CG:C	3465594	3465595	0	1.31288e-09	0.212	0.0327696
cg09073508	chr1	3531711	3531710	rs3927735:3447914:G:C	3531350	3531350	0	2.17904e-08	0.206658	0.0349483
cg10013316	chr1	3611064	3611063	rs60020855:3528292:GC:G	3611728	3611729	0	2.14788e-08	-0.11811	0.019964
cg17919477	chr1	3657944	3657943	rs1885864:3554988:C:T	3638424	3638424	0	1.06952e-07	-0.157825	0.0282597
cg04392488	chr1	3727663	3727662	rs7542464:3674152:C:T	3757588	3757588	0	8.90962e-12	-0.205994	0.0278281
cg06872770	chr1	3771565	3771564	rs6675513:3466854:G:A	3550290	3550290	0	3.26436e-08	-0.476379	0.0817
cg09321566	chr1	3815252	3815251	rs3833958:4656725:G:GAGCCC	4596665	4596665	0	2.52574e-07	-0.170984	0.0316489
cg04835615	chr1	3857265	3857264	rs80344793:3112714:A:G	3196150	3196150	0	5.53655e-07	0.272102	0.0520004
cg22157494	chr1	3858264	3858263	rs12755519:3750075:T:C	3833511	3833511	0	1.09486e-08	-0.256493	0.0423809
cg00889473	chr1	3858435	3858434	rs34966926:3751728:G:GT	3835164	3835164	0	4.37814e-11	-0.279893	0.0393595
cg12744321	chr1	3858771	3858770	rs34966926:3751728:G:GT	3835164	3835164	0	1.37202e-11	-0.225811	0.030832
cg05565139	chr1	3900276	3900275	rs34938659:3823206:AT:A	3906642	3906643	0	1.00941e-26	0.46538	0.0354237
cg25488973	chr1	4161600	4161599	1:4211869:C:CT	4151809	4151809	0	5.19805e-09	0.251828	0.0406149
cg23706211	chr1	109250233	109250232	rs59201433:109792735:A:ACGC	109250113	109250113	0	3.02021e-11	-0.11994	0.0167057
cg23639374	chr1	109250304	109250303	rs34293021:109784026:T:C	109241404	109241404	0	3.00248e-07	0.0834753	0.0155581
cg01920850	chr1	109465131	109465130	rs35930265:110014203:AT:A	109471581	109471582	0	8.76638e-10	-0.193449	0.0295466
cg21079113	chr1	109467468	109467467	rs5776978:110016515:T:TA	109473893	109473893	0	1.32923e-08	0.128856	0.0214291
cg21451998	chr1	109655619	109655618	rs56097627:110198129:CAAA:C	109655507	109655510	0	3.35166e-13	0.234099	0.0293078
cg03075996	chr1	109655950	109655949	kgp3155172	109656105	109656105	0	2.05091e-16	0.76395	0.082537
cg14766675	chr1	109656074	109656073	rs141287448:110185191:T:TATACAC	109642569	109642569	0	1.1559e-09	0.428596	0.0659986
cg21460053	chr1	109656232	109656231	rs141287448:110185191:T:TATACAC	109642569	109642569	0	1.64693e-09	0.430675	0.0670259
cg03070194	chr1	109668063	109668062	rs511566:110111239:T:G	109568617	109568617	0	3.1841e-07	0.102398	0.01913
cg24506221	chr1	109687780	109687779	rs148490733:110241834:A:G	109699212	109699212	0	3.64339e-15	1.42008	0.161935
cg01291099	chr1	109819728	109819727	rs480419	109817260	109817260	0	7.35995e-23	-0.359693	0.0307606
cg03271175	chr1	110339237	110339236	rs72689525:110410607:A:T	109867985	109867985	0	2.19647e-07	0.183418	0.0337637
cg06272768	chr1	110717168	110717167	rs35294561:111280629:T:A	110738007	110738007	0	3.38725e-28	-0.444969	0.0325004
cg01715299	chr1	110992844	110992843	rs34842794:111540013:C:CT	110997391	110997391	0	2.17762e-17	0.231018	0.0239882
cg26809584	chr1	111270524	111270523	rs3118209:111812196:C:T	111269574	111269574	0	1.78881e-08	0.132068	0.0221842
cg10921191	chr1	111449215	111449214	rs1264897:111993224:C:T	111450602	111450602	0	1.17413e-12	0.121193	0.0156055
cg10210015	chr1	111571455	111571454	rs6700893:112123394:G:A	111580772	111580772	0	1.8628e-13	0.211347	0.0261225
cg17736895	chr1	111623652	111623651	rs2786989:112148362:G:T	111605740	111605740	0	2.42672e-07	-0.128335	0.023717
cg01231075	chr1	111656621	111656620	rs10562732:112154317:TTACA:T	111611695	111611699	0	7.67603e-09	0.108498	0.0177196
cg06324983	chr1	111738615	111738614	rs127204:112277693:A:C	111735071	111735071	0	1.1171e-08	-0.395125	0.0653309
cg10283737	chr1	111991128	111991127	rs66461719:112534017:T:TG	111991395	111991395	0	2.23821e-11	0.260896	0.0360625
cg18281935	chr1	112696714	112696713	rs35183156:114073530:CCT:C	113530908	113530910	0	5.78094e-07	-0.118528	0.0226923
cg24087884	chr1	112707105	112707104	rs3806443:113249486:C:G	112706864	112706864	0	4.12094e-08	-0.533558	0.092263
cg13060157	chr1	112743989	112743988	rs6682219:113333886:G:T	112791264	112791264	0	4.04119e-08	0.163327	0.028223
cg23175215	chr1	113073012	113073011	rs41283098:113615661:G:A	113073039	113073039	0	3.0812e-09	0.19328	0.030663
cg12080952	chr1	113141077	113141076	rs71690812:113707355:CT:C	113164733	113164734	0	3.33307e-08	0.168452	0.028911
cg21222618	chr1	113142785	113142784	rs60220594:113744794:G:T	113202172	113202172	0	8.82299e-09	-0.202852	0.0332802
cg20611115	chr1	113542338	113542337	rs10590203:114084966:GGAGTT:G	113542344	113542349	0	6.60373e-10	-0.507235	0.0768354
cg15100757	chr1	196897348	196897347	1:196804674:G:GAAAAAAAAAAAAA	196835544	196835544	0	1.77284e-06	0.195287	0.03926
cg07967246	chr1	197336048	197336047	rs10717605:197309622:GA:G	197340492	197340493	0	1.67284e-27	0.512514	0.0381607
cg18385770	chr1	197357197	197357196	rs10717605:197309622:GA:G	197340492	197340493	0	3.06796e-24	-0.496772	0.0406894
cg05088098	chr1	198804549	198804548	rs112700728:198784207:A:AT	198815078	198815078	0	1.26529e-09	0.245765	0.0379468
cg21635230	chr1	199152805	199152804	rs35643631:199114882:TATAA:T	199145754	199145758	0	1.52143e-15	0.262995	0.0294908
cg10868949	chr1	199202710	199202709	rs6684754:199171827:T:A	199202699	199202699	0	1.65826e-15	-0.465809	0.052319
cg16342049	chr1	199308420	199308419	rs3032430:199277505:TTA:T	199308377	199308379	0	2.48014e-26	-0.533945	0.0411003
cg02457750	chr1	200042146	200042145	rs59429274:199996821:AT:A	200027693	200027694	0	4.07022e-07	-0.139563	0.0263342
cg16144193	chr1	200302328	200302327	rs1357668:200273100:G:C	200303972	200303972	0	1.81587e-12	0.229139	0.0298032
cg24293285	chr1	200302333	200302332	rs151288411:200291018:A:G	200321890	200321890	0	1.57105e-20	0.488089	0.0451065
cg06792347	chr1	200302543	200302542	rs151288411:200291018:A:G	200321890	200321890	0	1.31657e-22	0.440294	0.03796
cg06002802	chr1	200363412	200363411	rs6664603:200366457:C:T	200397329	200397329	0	2.45765e-08	-0.175252	0.0297603
cg21146967	chr1	200625519	200625518	rs2808253:200593169:A:C	200624041	200624041	0	1.76924e-20	-0.216517	0.0200452
cg25023902	chr1	200668910	200668909	rs113446248:200659423:C:CT	200690295	200690295	0	2.52864e-07	0.14784	0.0273661
cg26421413	chr1	200671415	200671414	rs79821962:200581128:C:CT	200612000	200612000	0	3.77562e-07	0.145095	0.0272942
cg08692937	chr1	200891372	200891371	rs71635521:200890944:C:T	200921816	200921816	0	1.16642e-07	-0.838179	0.150573
cg08692937	chr1	200891372	200891371	rs371091665:200113357:T:A	200144229	200144229	1	5.46981e-08	0.722875	0.126276
cg00909514	chr1	200891407	200891406	rs7528977:200904899:T:G	200935771	200935771	0	1.37625e-07	-0.505326	0.0913508
cg00891176	chr1	201113604	201113603	rs2281846:201081777:C:G	201112649	201112649	0	2.3053e-09	0.157988	0.0248406
cg16468546	chr1	201171746	201171745	rs6699983	201168399	201168399	0	1.77031e-09	0.107782	0.0168108
cg04304469	chr1	201171757	201171756	rs28517289:201137771:T:C	201168643	201168643	0	2.11762e-07	0.105767	0.0194417
cg19764279	chr1	201270229	201270228	rs12129670:201237806:C:T	201268678	201268678	0	1.45969e-14	-0.683136	0.0800673
cg12662007	chr1	201281058	201281057	rs199660508:201202686:TG:T	201233558	201233559	0	1.27783e-07	0.153389	0.0276509
cg26066583	chr1	201282254	201282253	rs199660508:201202686:TG:T	201233558	201233559	0	2.49784e-09	0.294937	0.0464876
cg02855983	chr1	201283197	201283196	rs199660508:201202686:TG:T	201233558	201233559	0	7.97999e-09	0.235609	0.0385278
cg04904030	chr1	201284844	201284843	rs12408733:201221432:G:A	201252304	201252304	0	5.62889e-08	0.154947	0.0270951
cg07189167	chr1	201309761	201309760	rs199660508:201202686:TG:T	201233558	201233559	0	1.56946e-11	0.395946	0.0542435
cg16253788	chr1	201374466	201374465	rs12563097:201344646:C:G	201375518	201375518	0	1.75058e-07	-0.372091	0.0678907
cg08639762	chr1	201468171	201468170	rs863826:201133774:G:A	201164646	201164646	0	2.31852e-07	-0.0694649	0.0128144
cg19827875	chr1	201649157	201649156	rs139463647:201132445:C:T	201163317	201163317	0	8.60613e-12	-1.74722	0.235835
cg22572173	chr1	201888623	201888622	rs113195075:201929527:C:CA	201960399	201960399	1	4.85913e-07	-1.11554	0.212033
cg19676312	chr1	201982459	201982458	rs61819995:201331913:C:A	201362785	201362785	0	1.67617e-10	0.506663	0.0738428
cg12479090	chr1	201983674	201983673	rs12059693:201953994:A:G	201984866	201984866	0	1.87955e-16	0.209611	0.0226105
cg08129759	chr1	202122817	202122816	rs145143726:202685193:AAAACAAAC:A	202716065	202716073	0	9.50473e-07	0.119348	0.0233388
cg08811228	chr1	202129963	202129962	rs6676433:202093628:A:G	202124500	202124500	0	6.08341e-10	-0.282158	0.0426396
cg10734950	chr1	202809638	202809637	rs10699901:202778804:A:AAG	202809676	202809676	0	2.39534e-21	-0.262497	0.0235903
cg05404107	chr1	202852514	202852513	rs61823671:202061408:T:C	202092280	202092280	0	3.78606e-07	0.291841	0.0549053
cg07771034	chr1	202967423	202967422	rs35356717:202936527:G:T	202967399	202967399	0	3.40835e-08	0.141794	0.0243549
cg03058725	chr1	202968485	202968484	rs4989513:202929586:T:C	202960458	202960458	0	4.5052e-08	-0.144873	0.0251312
cg09396704	chr1	203076102	203076101	rs4950876	203052679	203052679	0	1.44466e-07	-0.082841	0.0150035
cg25482438	chr1	203186757	203186756	rs4950928:203155882:G:C	203186754	203186754	0	1.64392e-14	-0.238066	0.0279697
cg04370730	chr1	34782366	34782365	rs6700999:35255011:C:G	34789410	34789410	0	4.774e-09	-0.0929416	0.0149491
cg12633102	chr1	35210889	35210888	exm2264999	35170626	35170626	0	5.71422e-09	0.181199	0.0293123
cg22698544	chr1	35487526	35487525	rs149779582:36136842:ACTTCCTTCCTTCCTTCCTTC:A	35671241	35671261	0	6.22482e-14	1.63425	0.197335
cg12667125	chr1	35715847	35715846	rs274130:36584725:C:G	36119124	36119124	0	1.54436e-06	-0.130331	0.0260386
cg02927292	chr1	36036217	36036216	rs272821:36678116:C:A	36212515	36212515	0	6.01219e-09	1.03463	0.167644
cg04313639	chr1	36149152	36149151	rs6680221:36659448:G:A	36193847	36193847	0	2.22264e-07	-0.28728	0.0529072
cg01773061	chr1	36397407	36397406	rs55690968:36862566:G:GA	36396965	36396965	0	1.68866e-15	0.141529	0.0159018
cg03733940	chr1	36432020	36432019	rs951919:36878126:A:G	36412525	36412525	0	3.01791e-07	-0.346804	0.0646504
cg12809031	chr1	36450104	36450103	rs3007217:36879232:T:C	36413631	36413631	0	1.56252e-06	-0.0907496	0.0181402
cg08584845	chr1	36710900	36710899	rs61771398:37221513:G:T	36755912	36755912	0	9.24878e-07	-0.187443	0.0366117
cg04510788	chr1	37033300	37033299	rs570399:37202767:G:A	36737166	36737166	0	3.22676e-08	-0.167309	0.0286822
cg17815567	chr1	37037750	37037749	rs56072313:37210357:AT:A	36744756	36744757	0	1.32911e-06	-0.117011	0.0232212
cg04851505	chr1	37318271	37318270	rs11313397:37852334:CA:C	37386733	37386734	0	4.35055e-08	-0.231155	0.0400488
cg19234488	chr1	37318371	37318370	rs74066224:37903059:C:T	37437458	37437458	0	5.80225e-08	0.24597	0.0430592
cg25118706	chr1	37549444	37549443	rs2294875:38052445:C:T	37586844	37586844	0	3.88976e-08	0.107441	0.0185408
cg19232655	chr1	37556716	37556715	rs215206	37486153	37486153	0	1.18905e-07	-0.167909	0.0301858
cg11365623	chr1	37556727	37556726	rs59248131:37968167:TG:T	37502566	37502567	0	5.81195e-09	0.1977	0.0319991
cg14830003	chr1	37557057	37557056	1:38806922:C:T	38341250	38341250	0	1.49238e-06	0.711904	0.142012
cg03752439	chr1	37622207	37622206	rs61776214:38096429:G:A	37630757	37630757	0	1.02339e-06	-0.127131	0.0249409
cg23054364	chr1	37724506	37724505	rs151059857:38086874:G:C	37621202	37621202	0	8.37933e-30	-2.348	0.164222
cg08592768	chr1	37726398	37726397	rs35436820:38190032:C:T	37724360	37724360	0	1.6681e-40	1.12264	0.0607346
cg08134680	chr1	37756640	37756639	1:38145414:A:AGGG	37679742	37679742	1	4.1429e-08	-1.12129	0.19393
cg24094073	chr1	37767457	37767456	rs482818:38233399:C:G	37767727	37767727	0	2.52677e-08	0.125254	0.0212904
cg00563699	chr1	37931766	37931765	rs822859:37425437:G:C	36959836	36959836	0	2.06535e-07	-0.143577	0.0263659
cg17489086	chr1	37947147	37947146	rs71675317:38391360:TCTAA:T	37925688	37925692	0	1.326e-13	0.57494	0.0705445
cg14668822	chr1	37949472	37949471	rs67963450:38458019:TC:T	37992347	37992348	0	1.29471e-06	-0.124571	0.0246927
cg12789062	chr1	38046992	38046991	rs201555743:38518963:T:TG	38053291	38053291	0	5.35242e-13	0.697235	0.0882
cg02680427	chr1	38783591	38783590	rs12729493	38781817	38781817	0	2.06338e-07	0.174586	0.0320591
cg11396951	chr1	39026424	39026423	rs34497935:39530200:CA:C	39064528	39064529	0	8.26393e-10	0.131648	0.0200726
cg09071280	chr1	39076281	39076280	rs146110275:39288781:G:GGA	38823109	38823109	0	5.96209e-07	0.138647	0.0265786
cg05374241	chr1	39332429	39332428	rs5773652:39681115:G:GT	39215443	39215443	0	2.31038e-09	0.171569	0.0269777
cg11016786	chr1	39541962	39541961	rs139622852:39983274:C:T	39517602	39517602	0	8.49674e-09	0.137812	0.0225819
cg22080281	chr1	226189358	226189357	rs6426461:226613233:T:C	226425532	226425532	0	7.40353e-07	0.101393	0.0196159
cg22904066	chr1	226424285	226424284	rs34474228:226611970:AAG:A	226424269	226424271	0	7.48456e-15	0.231549	0.0267794
cg10355620	chr1	226443205	226443204	rs4653742:226636746:G:T	226449045	226449045	0	2.89972e-07	0.170091	0.0316572
cg00650925	chr1	226675215	226675214	rs10916023:226837259:C:T	226649558	226649558	0	6.09393e-10	0.140783	0.0212761
cg03307360	chr1	226870726	226870725	rs10639039:227028819:A:AAT	226841118	226841118	0	1.19622e-11	0.123607	0.0168199
cg04101019	chr1	226883267	226883266	rs3831497:227073669:C:CAAG	226885968	226885968	0	2.44559e-08	0.135186	0.0229526
cg04526825	chr1	226912817	226912816	rs60484304:227006531:CA:C	226818830	226818831	1	1.56824e-08	0.673146	0.112569
cg13572638	chr1	226985953	226985952	rs201737042:227194638:T:C	227006937	227006937	0	1.64319e-20	-0.39109	0.0361669
cg08162592	chr1	226992150	226992149	rs76381012:227187823:TAATAATAATAATAAG:T	227000122	227000137	0	4.17266e-14	-0.253704	0.0303803
cg12375870	chr1	227244044	227244043	rs76570121:228202931:C:T	228015230	228015230	0	4.46671e-07	0.654899	0.124046
cg02525420	chr1	227314194	227314193	rs75318616:227441308:A:C	227253607	227253607	0	4.48206e-08	0.284155	0.0492835
cg03890680	chr1	227317021	227317020	rs199658638:227274387:CTT:C	227086686	227086688	0	1.81665e-10	-0.264841	0.0386841
cg06348275	chr1	227319359	227319358	rs59212512:227345656:C:CTT	227157955	227157955	0	9.15814e-07	0.126582	0.0247137
cg20269993	chr1	227325257	227325256	rs59457689:227389379:CAT:C	227201678	227201680	0	9.9363e-18	0.252735	0.0258929
cg21436055	chr1	227558411	227558410	rs10799445:227911883:A:C	227724182	227724182	0	2.9471e-07	-0.110892	0.0206526
cg21426434	chr1	227563456	227563455	1:227684264:C:T	227496563	227496563	0	8.99633e-07	0.0978718	0.0190936
cg21880765	chr1	227775093	227775092	rs11579081:227816090:G:T	227628389	227628389	0	1.19022e-07	0.301358	0.0541784
cg11647690	chr1	227948556	227948555	rs10127943:228110064:G:A	227922363	227922363	0	2.09563e-06	-0.0973322	0.0197174
cg02991924	chr1	228005537	228005536	rs56294253:228215993:ATT:A	228028292	228028294	0	3.55886e-07	0.136482	0.0256124
cg05394663	chr1	228061085	228061084	rs202177020:228248859:G:GC	228061158	228061158	0	7.1096e-15	-0.486981	0.0562637
cg06090806	chr1	228163364	228163363	rs72763970:228682857:C:T	228495156	228495156	0	1.29216e-07	-0.718053	0.129495
cg03054277	chr1	228212517	228212516	rs6682260:228351087:A:C	228163386	228163386	0	5.97031e-07	0.138023	0.0264606
cg19025525	chr1	228379124	228379123	rs10916277:228386374:C:T	228198673	228198673	0	1.66582e-10	0.416517	0.0606944
cg00313981	chr1	228407362	228407361	rs114027369:228022596:A:T	227834895	227834895	0	1.57227e-06	-0.21938	0.0438648
cg27363486	chr1	228415945	228415944	1:228102349:T:C	227914648	227914648	0	1.55706e-08	-0.35197	0.0588454
cg24848599	chr1	228417100	228417099	rs532465:228587492:T:C	228399791	228399791	0	3.18038e-07	-0.130859	0.0244458
cg19861957	chr1	228501057	228501056	rs12757525:229092319:C:T	228956572	228956572	0	5.14315e-07	-0.325937	0.0620976
cg20971488	chr1	228650549	228650548	rs199818102:228771365:A:G	228635618	228635618	0	1.05505e-06	0.159758	0.0313835
cg10084041	chr1	228852424	228852423	rs714349	228859472	228859472	0	1.22991e-07	0.0949012	0.0170826
cg04849089	chr1	229190344	229190343	rs116110798:228525245:A:G	228337544	228337544	0	2.91786e-08	-0.541526	0.0925088
cg01446690	chr1	229436382	229436381	rs59228224:229567683:TC:T	229431936	229431937	0	2.70821e-07	-0.135629	0.0251744
cg09261111	chr1	229600532	229600531	rs3955545:229776053:C:T	229640306	229640306	0	1.37911e-07	-0.0962511	0.0174013
cg25844211	chr1	229625710	229625709	1:228918056:T:C	228782309	228782309	0	1.53891e-08	0.510649	0.0853408
cg00550925	chr1	230068227	230068226	rs6684422:230210365:A:T	230074618	230074618	0	3.22111e-08	0.126691	0.0217175
cg02931783	chr1	230112976	230112975	rs3033644:230258361:CTG:C	230122614	230122616	0	2.02074e-14	-0.220725	0.0260409
cg16698674	chr1	230136612	230136611	1:230246459:C:T	230110712	230110712	0	5.69632e-12	-0.795609	0.106319
cg16246661	chr1	230136865	230136864	1:230246459:C:T	230110712	230110712	0	8.50465e-19	-0.566248	0.0556955
cg18187658	chr1	230158945	230158944	rs113806412:230294662:GTGTC:G	230158915	230158919	0	3.9967e-07	0.325436	0.0613609
cg09938881	chr1	230321886	230321885	rs6541310:230421520:G:A	230285774	230285774	0	1.92339e-07	0.113222	0.0207339
cg22430231	chr1	230425455	230425454	rs4846996:230757632:G:C	230621886	230621886	0	1.96031e-07	0.323589	0.0593016
cg10295790	chr1	230592044	230592043	rs200587	230593155	230593155	0	1.23009e-16	0.23744	0.0254176
cg21440977	chr1	230632698	230632697	rs371520090:230742894:G:A	230607148	230607148	0	4.46855e-08	0.231497	0.0401462
cg24435244	chr1	230770107	230770106	rs1202530:230956204:C:T	230820458	230820458	0	1.13279e-06	-0.144448	0.0284644
cg26391634	chr1	231187620	231187619	rs12032558:231318678:C:T	231182932	231182932	0	5.35359e-07	0.217971	0.0415972
cg18941796	chr1	17437680	17437679	rs114999606:17843257:G:A	17516761	17516761	0	8.15729e-09	-0.330531	0.0540885
cg13095091	chr1	17623110	17623109	rs794230	17962758	17962758	0	5.92453e-11	147.049	20.8424
cg14485232	chr1	17689099	17689098	rs10888047:18008484:T:TA	17681989	17681989	0	6.1941e-19	0.569189	0.055699
cg06959664	chr1	17689154	17689153	rs35624169:18012573:T:C	17686078	17686078	0	2.61526e-12	0.22294	0.029245
cg02663622	chr1	17741401	17741400	rs75983773:18065802:G:T	17739307	17739307	0	4.20427e-07	0.464154	0.0876979
cg19874862	chr1	17970968	17970967	rs2095842	17970913	17970913	0	2.32648e-08	0.116381	0.0197258
cg04812681	chr1	18708192	18708191	rs3819345:19039186:C:T	18712692	18712692	0	1.23825e-07	-0.250593	0.0451195
cg13786083	chr1	18784241	18784240	rs11267925:19111072:GTGGCCGTGGCCA:G	18784578	18784590	0	1.0777e-19	-0.678774	0.0646082
cg00440468	chr1	18784275	18784274	rs11267925:19111072:GTGGCCGTGGCCA:G	18784578	18784590	0	4.91174e-21	-0.761561	0.0691675
cg19637330	chr1	18784429	18784428	rs11267925:19111072:GTGGCCGTGGCCA:G	18784578	18784590	0	1.17587e-20	-0.632295	0.0581791
cg26220594	chr1	18784485	18784484	rs11267925:19111072:GTGGCCGTGGCCA:G	18784578	18784590	0	6.1027e-19	-0.476474	0.0466151
cg16823064	chr1	18880066	18880065	rs71575901:19206517:C:CGCTGCTCTG	18880023	18880023	0	9.72328e-15	-0.320334	0.0372406
cg18177731	chr1	18922883	18922882	rs61759277:19252031:G:A	18925537	18925537	0	1.81039e-07	-0.442574	0.0808561
cg18533966	chr1	19010110	19010109	rs57264916:19317941:TAAAAAA:T	18991447	18991453	0	5.27771e-07	0.0929328	0.0177246
cg10270640	chr1	19028140	19028139	rs111320829:19341990:T:TTTC	19015496	19015496	0	2.86538e-12	-0.207282	0.0272495
cg25326069	chr1	19423350	19423349	rs12730973:19709918:A:G	19383424	19383424	0	1.83206e-12	0.188753	0.0245555
cg03517918	chr1	19619905	19619904	rs58305507:19031966:C:T	18705472	18705472	0	2.82556e-07	-0.32369	0.0601827
cg10923719	chr1	19643705	19643704	rs7553353:19858213:T:G	19531719	19531719	0	8.96716e-08	-0.172172	0.0306261
cg07147364	chr1	19643763	19643762	rs4350219:19858807:T:C	19532313	19532313	0	2.55455e-07	-0.157093	0.0290907
cg08822352	chr1	19659768	19659767	rs7364625:19986076:A:G	19659583	19659583	0	5.43602e-07	0.181833	0.0347229
cg21615127	chr1	19800383	19800382	rs60281985:19867093:G:A	19540599	19540599	0	2.83238e-09	-0.968231	0.153205
cg13843611	chr1	19816597	19816596	rs958013:20146186:A:T	19819693	19819693	0	4.09739e-07	-0.118464	0.0223591
cg25333947	chr1	19825327	19825326	rs4655239:20160074:C:T	19833581	19833581	0	2.23585e-07	0.115576	0.02129
cg05375585	chr1	20431321	20431320	rs875688:20728516:G:A	20402023	20402023	0	2.26505e-11	-0.316042	0.0436984
cg10550982	chr1	20431726	20431725	rs10753501	20431699	20431699	0	1.82334e-15	0.226564	0.0254934
cg22141907	chr1	20588688	20588687	rs66731853:20916238:G:A	20589745	20589745	0	8.98504e-16	0.20163	0.0223859
cg13292626	chr1	20588918	20588917	exm27043	20589208	20589208	0	1.22297e-11	-0.210891	0.0287128
cg05278081	chr1	20589084	20589083	rs1152990:20905050:G:A	20578557	20578557	0	8.97025e-08	-0.299642	0.0533013
cg23717251	chr1	20616580	20616579	rs10799647:20930381:A:G	20603888	20603888	0	1.1886e-07	0.144669	0.0260074
cg12908894	chr1	20732989	20732988	rs10916916:21308255:A:G	20981762	20981762	0	2.59899e-07	0.0945441	0.0175198
cg09125532	chr1	21349656	21349655	rs3026820:21660762:T:A	21334269	21334269	0	3.15732e-07	0.129406	0.0241673
cg11992582	chr1	21439915	21439914	rs7539092:22286061:A:G	21959568	21959568	0	6.89576e-07	0.156945	0.0302716
cg13580105	chr1	21648570	21648569	rs4654762:21973890:A:G	21647397	21647397	0	8.61697e-11	-0.497308	0.0711893
cg05120085	chr1	21659794	21659793	rs3767113:21939493:G:C	21613000	21613000	0	3.09944e-09	0.215886	0.0342557
cg05169722	chr1	21737174	21737173	rs143172994:22657777:G:A	22331284	22331284	0	1.80852e-07	0.44981	0.0821748
cg15119100	chr1	156705623	156705622	rs35161831:156300731:T:C	156330940	156330940	0	1.53101e-09	1.17064	0.181786
cg09166556	chr1	156754486	156754485	1:156470497:G:C	156500705	156500705	0	3.9595e-07	-0.582474	0.109783
cg16090143	chr1	156908955	156908954	rs12139641:156885767:A:G	156915975	156915975	0	1.05829e-06	-0.233943	0.0459628
cg13224583	chr1	156913954	156913953	rs144913510:157044691:C:CT	157074899	157074899	0	1.28852e-06	0.103756	0.0205624
cg19022717	chr1	156924743	156924742	rs57485864:156960491:T:TA	156990699	156990699	0	9.49202e-07	-0.163537	0.0319784
cg09474412	chr1	156958785	156958784	rs115759551:156963356:A:G	156993564	156993564	0	1.06782e-14	-1.07458	0.12516
cg01960096	chr1	157043175	157043174	rs2871343:157432249:T:G	157462459	157462459	0	6.837e-07	0.128479	0.0247722
cg15883322	chr1	157045257	157045256	rs71681066:156962407:GTA:G	156992615	156992617	0	1.71144e-11	0.146764	0.0201499
cg19729719	chr1	157045261	157045260	rs71681066:156962407:GTA:G	156992615	156992617	0	7.62344e-12	0.1345	0.0181008
cg13209980	chr1	158025251	158025250	rs115366335:157894515:C:T	157924725	157924725	0	2.93669e-15	-1.19253	0.135421
cg07255378	chr1	158461544	158461543	1:158393017:A:AT	158423227	158423227	0	1.26599e-21	0.427613	0.038074
cg19884600	chr1	158932149	158932148	rs148595522:158857451:T:G	158887661	158887661	0	1.10748e-23	-2.4721	0.205997
cg27541604	chr1	159076662	159076661	rs61339753:158999469:GTT:G	159029679	159029681	0	1.47213e-08	0.152813	0.0255004
cg25076881	chr1	159440047	159440046	rs201589532:159433269:T:TA	159463479	159463479	0	2.18258e-12	0.210507	0.0274973
cg19477568	chr1	159865446	159865445	rs11265291:159853321:G:A	159883531	159883531	0	4.07927e-07	-0.0932611	0.0175991
cg08912361	chr1	159958002	159958001	rs78643522:159927851:G:A	159958061	159958061	0	1.47172e-11	-0.49254	0.0673685
cg27557127	chr1	160027499	160027498	rs57453836:159985299:A:G	160015509	160015509	0	4.95858e-11	0.237486	0.0335043
cg22546158	chr1	160176607	160176606	exm2268770	160175105	160175105	0	7.1775e-08	0.18573	0.032767
cg26162836	chr1	160262640	160262639	rs59634050:160705648:CG:C	160735858	160735859	0	2.47684e-13	-0.965874	0.120123
cg01180823	chr1	160503705	160503704	rs138076583:159761465:G:GCT	159791675	159791675	0	9.37972e-08	0.540685	0.0963389
cg17331569	chr1	160818346	160818345	rs56296294:160782228:G:C	160812438	160812438	0	1.70562e-07	-0.117828	0.021477
cg00945666	chr1	161020476	161020475	rs115878859:161686385:A:G	161716595	161716595	0	3.46745e-09	0.960258	0.152903
cg23055938	chr1	161021402	161021401	rs11368341:161031327:GA:G	161061537	161061538	0	7.9146e-07	0.184321	0.0357612
cg24411043	chr1	161038508	161038507	rs7556492:161029135:T:G	161059345	161059345	0	3.39551e-18	-0.542257	0.054561
cg00329300	chr1	161038673	161038672	rs55745240:161034642:A:G	161064852	161064852	0	7.05377e-21	-0.682044	0.0622791
cg27180868	chr1	161038961	161038960	rs7556492:161029135:T:G	161059345	161059345	0	7.17988e-13	-0.515106	0.0655915
cg24161057	chr1	161039022	161039021	rs4617422:161036472:G:A	161066682	161066682	0	4.98663e-18	-0.784971	0.0794907
cg13906823	chr1	161039035	161039034	rs55745240:161034642:A:G	161064852	161064852	0	2.79431e-14	-0.630052	0.0748261
cg18147168	chr1	161039131	161039130	rs7556492:161029135:T:G	161059345	161059345	0	1.10859e-17	-0.508212	0.0521637
cg19662687	chr1	161367890	161367889	rs4131825:161282246:C:A	161312456	161312456	0	2.9359e-07	0.23024	0.0428734
cg15358701	chr1	161440670	161440669	rs9427059:161442335:C:G	161472545	161472545	0	2.02029e-14	-0.327963	0.0386926
cg14831003	chr1	161512010	161512009	rs77132325:161622304:C:A	161652514	161652514	0	1.58862e-09	0.219212	0.0340788
cg26156167	chr1	161612862	161612861	rs2878011:161612476:G:A	161642686	161642686	0	1.80752e-09	0.304126	0.0474645
cg18200075	chr1	161736504	161736503	rs72706008:161708669:A:G	161738879	161738879	0	5.97599e-07	-0.242007	0.0463972
cg15735386	chr1	161765335	161765334	rs10715065:161887212:AT:A	161917422	161917423	0	1.01872e-08	-0.222584	0.0366905
cg06361628	chr1	56508706	56508705	rs200467907:56986926:AAAG:A	56521254	56521257	0	5.1238e-07	-0.0774225	0.0147482
cg14267555	chr1	56580074	56580073	rs78661681:57045755:AACC:A	56580082	56580085	0	1.10421e-18	-0.327394	0.0323389
cg17891251	chr1	56820593	56820592	rs60459258:57196378:C:A	56730705	56730705	0	6.41095e-08	-0.246459	0.0433017
cg05919360	chr1	57423746	57423745	rs144659354:57889896:C:T	57424224	57424224	0	1.35407e-08	0.150622	0.0250643
cg08164484	chr1	58248270	58248269	rs59473637:58975208:T:TA	58509536	58509536	0	8.37545e-11	-0.289172	0.0413635
cg21177673	chr1	58250551	58250550	rs141377546:58983944:G:A	58518272	58518272	0	1.01235e-16	-0.207427	0.0221275
cg11256607	chr1	58250635	58250634	rs141377546:58983944:G:A	58518272	58518272	0	4.72015e-14	-0.252855	0.0303563
cg14947965	chr1	58250701	58250700	rs59473637:58975208:T:TA	58509536	58509536	0	2.42967e-19	-0.277077	0.026712
cg06710648	chr1	58250706	58250705	rs141377546:58983944:G:A	58518272	58518272	0	1.10851e-21	-0.312298	0.0277532
cg10087412	chr1	58250861	58250860	rs141377546:58983944:G:A	58518272	58518272	0	1.41998e-17	-0.277236	0.0285765
ch.1.58573617F	chr1	58335358	58335357	rs59473637:58975208:T:TA	58509536	58509536	0	8.1262e-10	-0.201469	0.0307032
cg08249075	chr1	58358638	58358637	rs141377546:58983944:G:A	58518272	58518272	0	3.36194e-21	-0.407607	0.0368137
cg14560369	chr1	58432881	58432880	rs59473637:58975208:T:TA	58509536	58509536	0	5.46794e-36	-0.594682	0.0356531
cg16786284	chr1	58460660	58460659	rs12726229:58950901:A:T	58485229	58485229	0	1.27338e-24	-0.378187	0.0306186
cg25098418	chr1	59498804	59498803	rs3990413:59948306:G:GTATA	59482634	59482634	0	2.78781e-07	0.105222	0.019553
cg20740434	chr1	60621836	60621835	rs898727:61050369:T:C	60584697	60584697	0	4.36918e-07	-0.120201	0.0227469
cg22409850	chr1	60994484	60994483	rs1694219:61460173:A:T	60994501	60994501	0	3.20638e-08	-0.134957	0.0231308
cg21681549	chr1	61077018	61077017	rs71050110:61542770:G:GAGGGGAGA	61077098	61077098	0	5.08002e-12	0.221256	0.0294855
cg07511021	chr1	61815864	61815863	exm64373	61795496	61795496	0	1.304e-29	-0.847332	0.0595665
cg05230511	chr1	62131146	62131145	rs10556294:62632034:TTTTTA:T	62166362	62166367	0	3.34516e-07	-0.173256	0.0324321
cg27300647	chr1	62194610	62194609	rs2481697:62647906:A:G	62182234	62182234	0	6.70821e-08	0.131548	0.0231506
cg26305583	chr1	62325961	62325960	rs12035318:62803079:A:G	62337408	62337408	0	2.96215e-08	-0.147902	0.0252794
cg17260184	chr1	62436151	62436150	rs58336065:62964310:G:GA	62498639	62498639	0	6.99776e-10	-0.123115	0.0186807
cg26877327	chr1	62441946	62441945	rs57650980:62954372:G:GA	62488701	62488701	0	4.79701e-10	-0.144905	0.021749
cg01173986	chr1	62596298	62596297	rs58336065:62964310:G:GA	62498639	62498639	0	9.70427e-11	-0.139449	0.0200254
cg09369493	chr1	63012401	63012400	rs112083257:63650500:C:T	63184829	63184829	1	1.73917e-06	-1.23922	0.248913
cg04238302	chr1	63149219	63149218	rs139277243:63618278:T:TA	63152607	63152607	0	2.2571e-12	0.281822	0.0368417
cg26449961	chr1	63593184	63593183	rs71701980:64065169:TAA:T	63599498	63599500	0	1.85986e-08	0.22014	0.0370272
cg07661407	chr1	63593268	63593267	rs3838451:63909553:TGGG:T	63443882	63443885	0	3.22147e-11	0.461395	0.0643713
cg05210526	chr1	63593379	63593378	rs138274469:63982020:G:GGGGAA	63516349	63516349	0	4.66582e-14	0.39396	0.0472851
cg15387114	chr1	63593539	63593538	rs72918611:63930811:C:T	63465140	63465140	0	6.73496e-14	0.455065	0.0550397
cg06744401	chr1	63593711	63593710	rs72918611:63930811:C:T	63465140	63465140	0	4.00628e-07	0.199628	0.0376436
cg00270148	chr1	63598927	63598926	rs34702253:63955079:C:CA	63489408	63489408	0	2.28052e-08	-0.185278	0.0313818
cg07906432	chr1	63987369	63987368	rs11344076:64393228:TA:T	63927557	63927558	0	6.98246e-09	0.16305	0.0265472
cg16008418	chr1	64186459	64186458	rs12025245:64657255:G:T	64191572	64191572	0	8.98665e-07	0.0985665	0.0192283
cg23863177	chr1	64345804	64345803	rs12033119:64786736:T:C	64321053	64321053	0	4.32768e-07	-0.118483	0.0224129
cg23249608	chr1	64664168	64664167	rs6687194:64939753:T:C	64474070	64474070	0	3.21548e-07	-0.114632	0.0214239
cg03883023	chr1	64848256	64848255	rs35511846:65193128:C:CA	64727445	64727445	0	1.57908e-07	0.134678	0.0244752
cg09774749	chr1	65002309	65002308	rs199679136:65467365:G:T	65001682	65001682	0	6.85304e-07	-0.323179	0.0623184
cg23523648	chr1	65149215	65149214	rs17127378:65648107:A:G	65182424	65182424	0	9.60188e-09	-0.364656	0.0599924
cg27037565	chr1	65264611	65264610	rs34750466:65741582:C:CT	65275899	65275899	0	6.0643e-08	-0.163556	0.0286778
cg05531421	chr1	65306656	65306655	rs10789179:65772315:G:A	65306632	65306632	0	1.91971e-18	0.374295	0.0373075
cg21807930	chr1	9014844	9014843	rs7529394:9078056:G:A	9017997	9017997	0	6.76225e-14	-0.172864	0.0209095
cg14961476	chr1	9070680	9070679	rs186264186:8235186:C:T	8175126	8175126	0	1.72845e-07	0.451263	0.0822955
cg25284492	chr1	9235374	9235373	rs11121349:9295794:G:C	9235735	9235735	0	4.76229e-07	0.142709	0.0271024
cg23606162	chr1	9281960	9281959	rs545087:9343162:A:G	9283103	9283103	0	1.6374e-07	0.148419	0.0270102
cg00280564	chr1	9365693	9365692	1:9369289:A:C	9309230	9309230	0	1.05835e-07	-1.78899	0.320205
cg18783781	chr1	9539009	9539008	rs181715706:9595643:T:C	9535584	9535584	0	5.32571e-10	0.242314	0.0364784
cg26899284	chr1	9654496	9654495	rs55746245:9714544:A:AG	9654486	9654486	0	8.3002e-18	-0.583625	0.0596106
cg01994208	chr1	9848170	9848169	rs1660735:9945538:C:T	9885480	9885480	0	6.11798e-08	0.141262	0.0247768
cg14844138	chr1	9939708	9939707	rs36181061:9034733:T:C	8974674	8974674	0	4.67952e-08	0.920554	0.159907
cg02481619	chr1	9943241	9943240	rs11121515:10125765:C:T	10065707	10065707	0	2.20814e-07	-0.185742	0.0341986
cg23866255	chr1	10033423	10033422	rs138009294:10152280:CTT:C	10092222	10092224	0	2.38354e-20	0.558217	0.0519138
cg14138827	chr1	10398302	10398301	rs34075302:10466046:A:G	10405989	10405989	0	1.37693e-23	-0.493837	0.0412724
cg15888996	chr1	10430750	10430749	rs6662684:10490789:G:C	10430732	10430732	0	1.69585e-36	0.82824	0.0490673
cg27571230	chr1	10497202	10497201	rs2847344:10564675:G:A	10504618	10504618	0	5.51724e-19	-0.307562	0.0300411
cg00391821	chr1	10506831	10506830	rs7548453:10589836:A:G	10529779	10529779	0	1.13719e-06	0.109046	0.0214918
cg06080068	chr1	10507743	10507742	rs3215946:10574185:GA:G	10514128	10514129	0	5.9613e-20	0.291277	0.0274714
cg06542282	chr1	10540166	10540165	rs34612970:10541880:CT:C	10481823	10481824	0	7.66712e-08	0.163881	0.0289827
cg12806121	chr1	10541333	10541332	rs60354536:10569000:C:CT	10508943	10508943	0	1.41922e-21	-0.427167	0.0380973
cg23975251	chr1	10544390	10544389	rs202087283:10563364:G:A	10503307	10503307	0	1.83634e-17	-0.422507	0.0437431
cg01849851	chr1	10548726	10548725	rs35502618:10529896:CT:C	10469839	10469840	0	2.80485e-19	0.559641	0.0540759
cg23863608	chr1	10553062	10553061	rs202087283:10563364:G:A	10503307	10503307	0	1.86231e-25	-0.343324	0.0271111
cg12830684	chr1	10553484	10553483	rs60354536:10569000:C:CT	10508943	10508943	0	1.97553e-23	-0.577583	0.0485089
cg05454781	chr1	10591288	10591287	rs60354536:10569000:C:CT	10508943	10508943	0	4.12035e-19	-0.252622	0.0245597
cg01834541	chr1	10591745	10591744	rs60354536:10569000:C:CT	10508943	10508943	0	7.44014e-31	-0.575182	0.0391363
cg12944311	chr1	10599850	10599849	rs60354536:10569000:C:CT	10508943	10508943	0	4.1759e-14	-0.319009	0.038201
cg23072051	chr1	10605459	10605458	rs2506885:10581051:A:T	10520994	10520994	0	7.18122e-11	-0.180915	0.0257728
cg09319435	chr1	10626219	10626218	rs60354536:10569000:C:CT	10508943	10508943	0	1.4766e-20	-0.265763	0.0245374
cg07555102	chr1	10636010	10636009	rs34612970:10541880:CT:C	10481823	10481824	0	5.28092e-09	0.160958	0.0259724
cg10582871	chr1	10665276	10665275	rs111473432:10288104:G:A	10228046	10228046	0	2.07632e-08	-0.34555	0.0583399
cg11868231	chr1	10861302	10861301	rs1280993:10921228:T:C	10861171	10861171	0	4.48768e-12	0.424765	0.0564379
cg04421351	chr1	10906017	10906016	rs113969349:10970514:T:TG	10910457	10910457	0	4.59801e-07	0.133675	0.0253498
cg11858029	chr1	11264351	11264350	rs35067541:11290178:TA:T	11230121	11230122	0	1.54313e-09	0.155279	0.0241187
cg03386086	chr1	11520050	11520049	rs35495085:11511958:C:CTTCG	11451901	11451901	0	3.30376e-13	0.227518	0.0284749
cg01615673	chr1	11526807	11526806	rs34011216:11494036:GC:G	11433979	11433980	0	2.19778e-07	-0.116634	0.0214705
cg13017573	chr1	11594459	11594458	rs2922243:11505112:T:A	11445055	11445055	0	3.51823e-17	0.16834	0.017626
cg22016747	chr1	11594905	11594904	rs140223564:11560335:A:T	11500278	11500278	0	1.22968e-07	0.457964	0.082435
cg26643377	chr1	11650404	11650403	rs35495085:11511958:C:CTTCG	11451901	11451901	0	2.48307e-08	0.131159	0.0222807
cg05796704	chr1	11654162	11654161	rs5772465:11714883:G:GGCGGGGC	11654826	11654826	0	2.27562e-07	0.19088	0.0351862
cg21106899	chr1	11719747	11719746	rs12142522:11790584:T:A	11730527	11730527	0	1.8006e-10	0.180501	0.0263585
cg15864438	chr1	11731764	11731763	rs6676319:11781973:G:A	11721916	11721916	0	5.14792e-17	-0.275264	0.0290144
cg05228408	chr1	11805296	11805295	rs12744757:11906821:C:T	11846764	11846764	0	1.7062e-07	0.18965	0.0345685
cg07532960	chr1	11841431	11841430	rs198365:11906641:C:T	11846584	11846584	0	1.34669e-11	0.208409	0.0284428
cg21104483	chr1	11908082	11908081	rs34536155:11967190:G:A	11907133	11907133	0	1.97761e-13	0.318517	0.0394197
cg00648630	chr1	11909905	11909904	1:11968358:T:G	11908301	11908301	0	1.21185e-22	1.01263	0.0872026
cg09619883	chr1	11915426	11915425	rs2336371:11949816:G:T	11889759	11889759	0	3.39966e-13	-0.185815	0.0232702
cg12808636	chr1	11927930	11927929	rs4846078:11967356:C:T	11907299	11907299	0	1.16538e-08	0.0928282	0.01537
cg08543703	chr1	11980391	11980390	rs6698008:12036918:T:G	11976861	11976861	0	8.66783e-09	0.0881463	0.014453
cg12516752	chr2	46736	46735	rs79841299:392873:C:T	392873	392873	0	2.63604e-07	0.159401	0.029555
cg00488012	chr2	227711	227710	rs10204657:209223:T:A	209223	209223	0	1.15883e-13	-0.417877	0.0511257
cg03990819	chr2	434333	434332	rs28471040:434854:A:C	434854	434854	0	2.22344e-07	-0.0896463	0.01651
cg17035276	chr2	731290	731289	rs55740571:776477:A:C	776480	776480	0	4.00907e-07	-0.267322	0.05041
cg08748184	chr2	741076	741075	rs13009022:749580:T:C	749580	749580	1	1.23328e-07	1.68261	0.302909
cg01580164	chr2	742417	742416	rs113050253:748141:G:A	748141	748141	0	9.77478e-26	-0.483217	0.037845
cg04587424	chr2	776723	776722	rs59990290:770593:T:TC	770593	770593	0	2.02535e-11	-0.179933	0.0248087
cg11612266	chr2	951482	951481	rs11903366:958039:T:C	962353	962353	0	1.49868e-08	-0.0955063	0.015947
cg12346921	chr2	1169638	1169637	rs34029327:1193231:G:A	1197545	1197545	0	3.08884e-15	-0.302451	0.0343789
cg10370591	chr2	1413660	1413659	rs72776494:560568:G:C	560568	560568	0	1.03017e-09	0.69376	0.106467
cg14108581	chr2	1422323	1422322	rs57608816:1451648:T:C	1447876	1447876	0	4.76937e-07	-0.126366	0.0240001
cg21913853	chr2	1539775	1539774	rs185893822:1588910:T:C	1585138	1585138	0	1.82201e-10	-0.304588	0.0444933
cg19564541	chr2	1573033	1573032	rs11904276:1524006:T:C	1520234	1520234	0	5.66117e-08	-0.167341	0.0292684
cg09699787	chr2	1707988	1707987	rs374975573:1708889:GAGCAGAGGGC:G	1705117	1705127	0	6.13031e-15	-0.26382	0.0303917
cg16909084	chr2	1708025	1708024	rs374975573:1708889:GAGCAGAGGGC:G	1705117	1705127	0	1.22631e-19	-0.297273	0.0283527
cg12086862	chr2	1715390	1715389	rs114360452:1741172:C:T	1737400	1737400	0	2.02209e-07	0.685235	0.12573
cg04785543	chr2	1730082	1730081	rs6715014:1735108:C:T	1731336	1731336	0	1.3314e-07	0.149735	0.0270344
cg04717370	chr2	1848827	1848826	rs12478139:1838677:T:C	1834905	1834905	0	6.83105e-07	-0.179117	0.0345343
cg00320539	chr2	1979668	1979667	rs11127297:1971494:T:C	1967722	1967722	0	1.56726e-09	-0.081525	0.0126687
cg17918270	chr2	1979713	1979712	rs10638570:1972057:C:CAG	1968285	1968285	0	8.55567e-09	-0.116076	0.0190245
cg20506745	chr2	2577514	2577513	rs12998281:3459391:T:C	3455620	3455620	0	7.19153e-07	-0.0753044	0.0145507
cg06546469	chr2	2732373	2732372	rs115617585:2738000:G:T	2734228	2734228	0	3.43526e-20	-0.680707	0.0636589
cg27075066	chr2	2763652	2763651	rs11691014:2738998:T:C	2735226	2735226	0	2.56595e-09	-0.2064	0.0325594
cg00106808	chr2	3041286	3041285	rs2872492:4064769:A:G	4017179	4017179	0	7.06764e-07	-0.103516	0.0199871
cg06076512	chr2	3059900	3059899	rs141083228:3063093:CG:C	3059321	3059322	0	1.292e-09	0.26445	0.0408574
cg23229329	chr2	3268393	3268392	rs113901219:3273364:G:A	3269593	3269593	0	1.89334e-09	-0.211778	0.0330985
cg25714774	chr2	3421694	3421693	rs11384639:3410083:C:CT	3406312	3406312	0	2.52939e-16	-0.278573	0.0302119
cg24808616	chr2	3473109	3473108	rs79841699:3471816:C:T	3468045	3468045	0	6.42465e-07	-0.118089	0.022709
cg09228148	chr2	119370125	119370124	rs190278860:120011982:C:G	119254406	119254406	0	8.72392e-18	-1.59775	0.163329
cg19599165	chr2	119437952	119437951	rs2587707:120234424:C:T	119476848	119476848	0	1.81314e-12	-0.177688	0.0231104
cg13882081	chr2	119455629	119455628	rs1992248:120283173:T:A	119525597	119525597	0	5.1582e-08	-0.198457	0.0345942
cg05857967	chr2	119524596	119524595	rs11286852:120315534:CA:C	119557958	119557959	0	1.29938e-14	0.229011	0.0267787
cg26009192	chr2	119524625	119524624	rs2438980:120310406:G:T	119552830	119552830	0	3.69201e-09	0.149664	0.0238781
cg27397893	chr2	119524641	119524640	rs2920695:120318903:T:C	119561327	119561327	0	7.15711e-07	0.108349	0.0209315
cg20296532	chr2	119524697	119524696	rs11286852:120315534:CA:C	119557958	119557959	0	4.07019e-10	0.156384	0.0233623
cg08815515	chr2	119645815	119645814	rs112487643:121075175:G:A	120317599	120317599	0	6.20652e-07	0.373286	0.0716797
cg23456409	chr2	119678855	119678854	rs73948921:120414833:G:A	119657257	119657257	0	1.04963e-06	-0.404758	0.0794942
cg00049286	chr2	119679082	119679081	2:120436206:T:G	119678630	119678630	0	1.85259e-08	-0.326636	0.0549324
cg05274172	chr2	120222990	120222989	rs72843423:121896454:C:G	121138878	121138878	0	8.78711e-07	-0.132612	0.0258449
cg27567334	chr2	120252298	120252297	rs368259653:121069988:C:CT	120312412	120312412	0	7.70185e-08	0.131929	0.0233357
cg11305121	chr2	120254015	120254014	rs4849843:121012836:G:T	120255260	120255260	0	1.16096e-10	-0.128927	0.0186038
cg14234520	chr2	120261214	120261213	rs80063047:120430042:G:A	119672466	119672466	0	1.22909e-17	-1.30914	0.134608
cg03973036	chr2	120313427	120313426	rs35699508:121070858:CG:C	120313282	120313283	0	1.71857e-14	0.221117	0.0260017
cg09984102	chr2	120329438	120329437	rs113832840:121269626:G:A	120512050	120512050	0	2.44273e-07	0.419222	0.0774946
cg23689428	chr2	120466389	120466388	rs3754633:122003356:G:A	121245780	121245780	0	3.55049e-07	-0.122502	0.0229866
cg11259746	chr2	120593924	120593923	rs11688372:121353119:C:T	120595543	120595543	0	9.59252e-07	0.117422	0.0229713
cg11269254	chr2	120614267	120614266	rs35962194:121393931:A:AG	120636355	120636355	0	7.9124e-13	-0.176067	0.0224688
cg22658948	chr2	120638952	120638951	rs7604844:121198148:G:C	120440572	120440572	0	4.66461e-07	0.247244	0.0469147
cg04864807	chr2	120654564	120654563	rs62166987:121402339:G:A	120644763	120644763	0	1.81263e-07	0.190113	0.0347343
cg04752871	chr2	120654857	120654856	rs11122805:121378718:A:C	120621142	120621142	0	4.21825e-07	0.166218	0.0314096
cg17870997	chr2	120740946	120740945	rs62150665:121506534:A:G	120748958	120748958	0	3.0104e-08	0.166705	0.0285093
cg14814621	chr2	120771612	120771611	rs776504	120755621	120755621	0	6.95208e-07	-0.127614	0.0246228
cg19775284	chr2	120813551	120813550	rs56236424:121571558:C:T	120813983	120813983	0	1.46991e-06	-0.106394	0.0212093
cg03562360	chr2	120912707	120912706	rs277525:121670398:T:C	120912822	120912822	0	1.28262e-06	0.148355	0.0293949
cg06378990	chr2	120912745	120912744	rs10209668:121587560:G:A	120829985	120829985	0	4.50279e-08	0.313365	0.0543587
cg19115164	chr2	121095486	121095485	rs10617719:121853287:CCTGA:C	121095711	121095715	0	6.49066e-12	-0.143851	0.0192838
cg14305230	chr2	121234966	121234965	rs17794420:121976642:G:A	121219066	121219066	0	1.66778e-06	0.0801986	0.0160783
cg27488252	chr2	121363843	121363842	rs34629679:122046025:G:T	121288449	121288449	0	7.82935e-07	0.343037	0.0665239
cg20019086	chr2	121860713	121860712	rs113692538:122620120:C:CA	121862544	121862544	0	2.62059e-13	0.254236	0.0316575
cg20324417	chr2	122451105	122451104	rs1349793:123142537:A:G	122384961	122384961	0	6.81861e-07	-0.144389	0.0278365
cg14537726	chr2	123444928	123444927	rs144843544:124154187:C:CAG	123396611	123396611	0	1.28957e-06	0.129626	0.0256901
cg13360395	chr2	123907705	123907704	rs115657360:124665215:T:G	123907638	123907638	0	1.01253e-07	-0.424144	0.0757901
cg16916377	chr2	125472125	125472124	rs71392290:126271490:T:TA	125513913	125513913	0	4.82387e-23	0.499629	0.0424787
cg27405400	chr2	127081964	127081963	rs35322174:127880633:C:T	127123057	127123057	0	1.09148e-06	-0.104407	0.0205406
cg14317533	chr2	127128741	127128740	rs35670975:127886546:AAAG:A	127128970	127128973	0	3.67098e-09	0.133429	0.021284
cg11883129	chr2	48341891	48341890	rs10549580:48586019:AATCC:A	48358880	48358884	0	1.03168e-08	0.222185	0.0366401
cg20536469	chr2	49974368	49974367	rs5831096:50408452:CA:C	50181314	50181315	0	3.27512e-07	0.219664	0.0410841
cg00345522	chr2	51033262	51033261	rs1558852	51024999	51024999	0	6.80586e-07	0.158792	0.0306108
cg11319187	chr2	54206845	54206844	rs202231897:54443679:A:AT	54216542	54216542	0	6.15527e-07	-0.111926	0.0214849
cg25124366	chr2	54330768	54330767	rs193272128:55158371:G:C	54931234	54931234	0	2.77383e-07	0.147835	0.0274662
cg06671215	chr2	54541501	54541500	rs62134678:54798713:T:C	54571576	54571576	0	2.79673e-13	-0.33921	0.0422986
cg22537928	chr2	54562094	54562093	rs60021245:54704537:CT:C	54477400	54477401	0	1.6839e-09	0.259896	0.0404746
cg16152092	chr2	54580047	54580046	rs13408295:54854905:C:T	54627768	54627768	0	3.14274e-12	-0.286773	0.0377818
cg04089644	chr2	54582627	54582626	rs10656687:54783793:C:CTT	54556656	54556656	0	5.11551e-09	0.205047	0.0330531
cg04077025	chr2	54586839	54586838	rs35378964:54958760:T:A	54731623	54731623	0	2.80017e-12	-0.198489	0.0260794
cg05651284	chr2	55050832	55050831	rs2972065:55308840:T:A	55081704	55081704	0	4.30242e-33	1.66118	0.106804
cg03820688	chr2	55250713	55250712	rs77518853:55439051:C:G	55211915	55211915	0	8.8327e-07	0.389219	0.0758719
cg09685747	chr2	55693647	55693646	rs62165235:55920663:T:C	55693528	55693528	0	7.11234e-08	-0.144362	0.0254603
cg14185860	chr2	56448807	56448806	rs62160398:56682709:C:A	56455574	56455574	0	2.87867e-14	-0.248704	0.0295546
cg09858955	chr2	57908817	57908816	rs11410659:58145483:A:AT	57918348	57918348	0	1.39685e-17	0.286173	0.0294894
cg04962892	chr2	58108044	58108043	rs72812358:58472014:G:C	58244879	58244879	0	4.38534e-08	-0.199676	0.0346047
cg11929279	chr2	58448305	58448304	rs368476892:58655793:TTGC:T	58428658	58428661	0	3.94156e-18	0.359222	0.0362342
cg14158202	chr2	58536078	58536077	rs35845497:58817834:C:CT	58590699	58590699	0	7.21408e-08	-0.0929057	0.0163938
cg05226072	chr2	60214112	60214111	rs9309322:60441184:G:A	60214049	60214049	0	1.91226e-07	0.0964317	0.0176552
cg17142477	chr2	60383223	60383222	rs7593210:60616335:C:G	60389200	60389200	0	1.96765e-07	-0.113346	0.020775
cg24361098	chr2	60521817	60521816	2:60748240:A:AC	60521105	60521105	0	2.08614e-10	-0.161052	0.0236138
cg16951074	chr2	60528225	60528224	rs114935712:60804436:T:C	60577301	60577301	0	5.79593e-19	-2.10271	0.205545
cg15644097	chr2	61145894	61145893	rs112583316:61404514:G:A	61177379	61177379	0	1.3701e-06	-0.116849	0.0232203
cg20158317	chr2	61177917	61177916	rs3821224:61404905:C:G	61177770	61177770	0	1.50503e-11	0.242987	0.0332538
cg00362816	chr2	61178495	61178494	rs112583316:61404514:G:A	61177379	61177379	0	4.14151e-11	-0.212283	0.0298089
cg18975177	chr2	61510841	61510840	rs55705084:61798046:CT:C	61570911	61570912	0	9.15862e-10	-0.207987	0.031808
cg24686644	chr2	61793787	61793786	2:61994601:T:TAAA	61767466	61767466	0	3.69095e-11	0.224658	0.0314529
cg17322665	chr2	61851757	61851756	rs70946766:62098114:GA:G	61870979	61870980	0	4.18855e-10	-0.71617	0.107076
cg26661603	chr2	62214372	62214371	rs185305180:62457405:G:A	62230270	62230270	0	1.38991e-12	0.201808	0.0260868
cg10323573	chr2	63615294	63615293	rs72806082:63894844:A:G	63667710	63667710	0	1.74512e-07	-0.156616	0.0285722
cg17515620	chr2	63696650	63696649	rs4671526:63910878:A:G	63683744	63683744	0	7.32705e-11	-0.139229	0.0198449
cg07645299	chr2	63764731	63764730	rs78970301:63929838:AT:A	63702704	63702705	0	1.62363e-08	0.149068	0.0249577
cg11143475	chr2	65027786	65027785	rs2540971:65252385:A:T	65025251	65025251	0	6.57942e-07	0.121484	0.0233854
cg05010058	chr2	65057129	65057128	rs10605604:65277366:CATTT:C	65050232	65050236	0	9.74479e-24	0.41775	0.0347505
cg22282680	chr2	65553345	65553344	rs34478618:65779525:C:CA	65552391	65552391	0	1.57183e-09	-0.199044	0.0309335
cg00486158	chr2	66554240	66554239	exm-rs2300478	66554321	66554321	0	1.4226e-06	0.0970083	0.0193099
cg05580181	chr2	66575452	66575451	rs744565:67775280:C:T	67548148	67548148	0	8.7862e-07	-0.216717	0.0422359
cg12294361	chr2	67649869	67649868	rs2861710:67900196:G:A	67673064	67673064	0	2.77512e-07	-0.111684	0.0207501
cg07444473	chr2	199467658	199467657	rs35055792:201198058:CT:C	200333335	200333336	0	1.07061e-06	-0.143641	0.0282355
cg03095365	chr2	200306398	200306397	rs17531568:201204862:G:A	200340139	200340139	0	5.44387e-10	0.219517	0.0330674
cg04283868	chr2	200306625	200306624	rs67414264:201206295:CTG:C	200341572	200341574	0	1.81365e-07	0.0755498	0.0138035
cg19220584	chr2	200398079	200398078	rs67965722:201144330:TAC:T	200279607	200279609	0	7.38091e-07	-0.145476	0.0281406
cg27547291	chr2	200586304	200586303	rs66717183:201450047:GT:G	200585324	200585325	0	2.98165e-14	0.132732	0.0157844
cg10637955	chr2	200811107	200811106	rs78244989:201675851:A:G	200811128	200811128	0	9.00976e-10	0.414964	0.0634308
cg19641384	chr2	200829406	200829405	rs4616462:201695859:G:A	200831136	200831136	0	2.5785e-09	-0.266755	0.0420868
cg17185244	chr2	200858859	200858858	rs10652214:201723565:T:TAAAAA	200858842	200858842	0	2.95911e-14	-0.283971	0.0337646
cg25567938	chr2	201129073	201129072	rs145262222:202238000:C:T	201373277	201373277	0	1.57908e-10	1.19724	0.174206
cg27510048	chr2	201276371	201276370	rs1035142	201288355	201288355	0	3.71977e-09	-0.160327	0.0255853
cg19066876	chr2	201363815	201363814	rs377709373:202367294:CA:C	201502571	201502572	0	1.27684e-06	0.113441	0.0224727
cg04047149	chr2	201420207	201420206	rs202219920:202376586:A:C	201511863	201511863	0	4.50087e-07	0.116313	0.0220381
cg06757995	chr2	201432198	201432197	rs139575450:202256966:TTACTC:T	201392243	201392248	0	6.55204e-08	0.21993	0.0386714
cg15971559	chr2	201440326	201440325	rs79186350:202390786:T:C	201526063	201526063	0	4.98539e-08	-0.553252	0.0963223
cg12304859	chr2	201450710	201450709	rs139575450:202256966:TTACTC:T	201392243	201392248	0	5.03585e-07	0.208407	0.039671
cg08521270	chr2	201451740	201451739	exm257180	201492026	201492026	0	4.03106e-30	-0.829393	0.0575243
cg06431681	chr2	201466268	201466267	2:202320155:GAC:G	201455432	201455434	0	4.0341e-07	-0.146441	0.0276219
cg14743125	chr2	201694176	201694175	rs10931969:202558687:C:T	201693964	201693964	0	1.88511e-07	0.41226	0.0754363
cg16638222	chr2	202056219	202056218	rs1357188:202933342:G:C	202068619	202068619	0	1.21046e-06	0.0972704	0.0192238
cg24273322	chr2	202222090	202222089	rs35168516:203040926:CT:C	202176203	202176204	0	4.35271e-11	0.154543	0.0217291
cg22406037	chr2	202726263	202726262	rs10532176:203035835:TACAC:T	202171112	202171116	0	3.48426e-07	0.298829	0.0560306
cg05080285	chr2	203536093	203536092	rs4031596:204278824:CTT:C	203414101	203414103	0	9.42558e-10	0.178008	0.0272462
cg05316708	chr2	203951165	203951164	rs4675377:204814676:C:T	203949953	203949953	0	1.59819e-07	0.230553	0.0419182
cg10898649	chr2	205193651	205193650	rs1921803:206056501:T:A	205191777	205191777	0	1.36028e-07	-0.160461	0.0289946
cg21459632	chr2	205283112	205283111	rs34773521:206495505:C:T	205630781	205630781	0	4.81678e-07	-0.185805	0.0353035
cg21539903	chr2	205611977	205611976	rs76813898:206340902:C:T	205476178	205476178	0	4.34576e-08	-0.846581	0.146668
cg26250831	chr2	205784244	205784243	rs143509744:207588412:TCG:T	206723688	206723690	0	1.43418e-08	0.454691	0.075809
cg26258077	chr2	206087436	206087435	rs71889714:206891880:GCA:G	206027156	206027158	0	3.0055e-07	0.189914	0.0353974
cg22444562	chr2	206225742	206225741	rs11281410:207089495:C:CCCTAGA	206224771	206224771	0	2.07847e-40	-1.98849	0.107804
cg01996799	chr2	206273044	206273043	rs10180974:207266781:A:T	206402057	206402057	0	2.58047e-07	-0.644104	0.119324
cg19455953	chr2	206765350	206765349	rs12465959:207623503:C:A	206758779	206758779	0	1.13029e-10	0.160556	0.0231511
cg10636737	chr2	207253674	207253673	rs6761015:208105477:A:T	207240753	207240753	0	7.44221e-09	-0.135443	0.0220981
cg14583419	chr2	207475025	207475024	rs143721058:208341093:A:G	207476369	207476369	0	3.16174e-22	0.227516	0.0198589
cg15965190	chr2	207505309	207505308	rs4675673:208259843:G:A	207395119	207395119	0	1.13424e-08	-0.187885	0.031081
cg10237835	chr2	207746185	207746184	rs10640659:208617638:C:CTGT	207752914	207752914	0	6.72361e-07	0.120786	0.0232724
cg20873420	chr2	207770194	207770193	rs6739830:208082651:G:A	207217927	207217927	0	1.03507e-06	-0.263887	0.0517957
cg07806607	chr2	208179739	208179738	rs62194838:209044479:G:A	208179755	208179755	0	2.0641e-10	-0.140441	0.0205858
cg23393139	chr2	208240513	208240512	rs75327705:209571520:T:C	208706796	208706796	0	3.74386e-07	-0.286117	0.0538039
cg09509267	chr2	208265719	208265718	rs11693993:209225223:G:A	208360498	208360498	0	8.29003e-12	0.31367	0.0422996
cg06391199	chr2	208406937	208406936	rs184777135:209501936:A:C	208637212	208637212	0	8.6138e-08	0.16854	0.0299353
cg20177995	chr2	209476760	209476759	rs11389534:210368990:T:TA	209504266	209504266	0	5.02542e-09	-0.226836	0.0365448
cg08250746	chr2	209526552	209526551	rs150943412:210342120:T:TA	209477396	209477396	0	8.36019e-32	-2.32793	0.154587
cg13847331	chr2	209697275	209697274	rs11901333:210447126:C:G	209582402	209582402	0	2.95721e-09	0.222188	0.0352042
cg00514964	chr2	209936573	209936572	rs2215669	209936539	209936539	0	1.91558e-07	-0.203874	0.0373287
cg18105667	chr2	210616158	210616157	rs61631854:212377672:C:T	211512947	211512947	0	4.74191e-07	0.256215	0.0486501
cg19523145	chr2	210955887	210955886	rs115424530:211820610:C:T	210955886	210955886	0	1.38092e-20	-2.57024	0.237067
cg24715680	chr2	214810706	214810705	rs60617579:215699046:C:A	214834322	214834322	0	1.08742e-22	-0.504705	0.043397
cg16491062	chr2	215441922	215441921	exm-rs1250229	215439661	215439661	0	8.06588e-14	0.332732	0.0403968
cg05847388	chr2	215881170	215881169	rs115130751:216667944:T:A	215803221	215803221	0	2.23545e-07	0.368343	0.0678516
cg23864375	chr2	215919744	215919743	rs11673944:216791707:T:G	215926984	215926984	0	3.9752e-28	-0.515054	0.0376914
cg07885759	chr2	215942360	215942359	rs3755152:216822197:A:G	215957474	215957474	0	1.91693e-07	-0.237225	0.0434364
cg18054993	chr2	215967021	215967020	rs200857348:216826913:G:GA	215962190	215962190	0	3.11832e-10	0.578523	0.0857787
cg26009582	chr2	216001425	216001424	rs200857348:216826913:G:GA	215962190	215962190	0	1.47513e-11	0.695431	0.0951249
cg02706766	chr2	216001743	216001742	rs200857348:216826913:G:GA	215962190	215962190	0	2.95922e-11	0.852491	0.118676
cg10820936	chr2	216006512	216006511	rs200857348:216826913:G:GA	215962190	215962190	0	8.45667e-10	0.67333	0.102733
cg25588852	chr2	216012554	216012553	rs10498052:216904399:C:T	216039676	216039676	0	4.38543e-08	0.263061	0.0455895
cg01884057	chr2	24927183	24927182	rs56133414:25135474:A:G	24912605	24912605	0	1.17267e-08	0.153423	0.0254082
cg04553793	chr2	24970969	24970968	rs5829958:25279305:C:CT	25056436	25056436	0	1.09602e-06	-0.140849	0.027715
cg17318576	chr2	25188012	25188011	rs35805096:25426926:G:GA	25204057	25204057	0	5.37203e-08	0.154427	0.0269585
cg19072090	chr2	25316225	25316224	rs10196664:25589466:A:G	25366597	25366597	0	1.54491e-07	0.180151	0.0327116
cg05896193	chr2	25340273	25340272	rs34298173:26390422:G:A	26167553	26167553	0	1.48892e-08	0.951628	0.158862
cg26586164	chr2	25672982	25672981	rs145933258:26041965:A:G	25819096	25819096	0	1.18637e-08	0.353623	0.0585858
cg05496738	chr2	25878688	25878687	rs141467966:25900148:C:T	25677279	25677279	0	7.66817e-10	0.422886	0.0643373
cg24913613	chr2	26086274	26086273	rs11680281:26384066:A:G	26161197	26161197	0	9.19043e-11	-0.468987	0.0672505
cg08067268	chr2	26243618	26243617	rs62128430:26395659:A:G	26172790	26172790	0	1.76631e-15	-0.298111	0.0335237
cg11170041	chr2	26319296	26319295	rs6744535:26546697:G:A	26323829	26323829	0	8.26077e-08	0.132549	0.0235062
cg02583525	chr2	26401745	26401744	rs6732552:26668790:G:T	26445922	26445922	0	5.83684e-07	0.124999	0.0239409
cg05053689	chr2	26503516	26503515	rs34537429:26296089:A:G	26073220	26073220	0	1.81646e-07	-0.628539	0.114846
cg20491914	chr2	26692482	26692481	rs58857921:26840578:G:C	26617710	26617710	0	1.17189e-06	0.194734	0.0384309
cg27485108	chr2	26728263	26728262	rs10201737:26839764:G:A	26616896	26616896	0	1.89164e-08	-0.367891	0.0619145
cg01704636	chr2	26728486	26728485	rs62129478:26832717:C:T	26609849	26609849	0	4.70425e-09	-0.331514	0.053297
cg07655965	chr2	27032657	27032656	rs34542160:27006493:AAT:A	26783625	26783627	0	5.46246e-09	-0.43512	0.0702875
cg11845159	chr2	27123724	27123723	rs35766826:26827290:G:A	26604422	26604422	0	4.47936e-08	0.336945	0.0584381
cg06829893	chr2	27123726	27123725	rs35766826:26827290:G:A	26604422	26604422	0	1.77031e-08	0.377377	0.0633678
cg25571625	chr2	27234548	27234547	rs144253032:27610537:T:C	27387670	27387670	0	1.64865e-07	-0.388375	0.0706975
cg10048975	chr2	27275896	27275895	rs78629734:27358724:G:A	27135856	27135856	0	1.24385e-07	-0.625793	0.112694
cg06536868	chr2	27308017	27308016	rs143645740:26538862:T:TG	26315994	26315994	0	1.70257e-06	0.411167	0.0825084
cg17029391	chr2	27629555	27629554	rs4665993:27779563:T:A	27556696	27556696	0	1.02498e-07	0.183407	0.032788
cg16844085	chr2	27629626	27629625	rs10175826:28261384:G:A	28038517	28038517	0	7.4519e-08	0.164909	0.029134
cg15787438	chr2	161136397	161136396	rs74269109:161987031:G:A	161130520	161130520	0	6.14747e-08	0.613827	0.107682
cg14879451	chr2	161251174	161251173	rs1267030:162138329:C:T	161281818	161281818	0	1.97783e-21	0.454227	0.0407068
cg24827032	chr2	162073181	162073180	rs35128070:162929732:G:A	162073222	162073222	0	2.19733e-07	0.162603	0.0299323
cg16441468	chr2	162490656	162490655	rs77803765:164016785:A:G	163160275	163160275	0	2.84483e-07	0.367683	0.0683807
cg03662049	chr2	163348320	163348319	rs144632411:164187719:C:G	163331209	163331209	0	7.33625e-08	0.129245	0.0228202
cg05360101	chr2	164777473	164777472	rs71393642:165660620:C:CA	164804110	164804110	0	1.00723e-07	-0.147442	0.0263412
cg02419922	chr2	166149542	166149541	rs72877476:167011684:G:A	166155174	166155174	0	9.15676e-09	0.216356	0.035539
cg01638243	chr2	166149725	166149724	rs35047201:167001637:C:T	166145127	166145127	0	1.1288e-13	0.151667	0.0185455
cg06297350	chr2	166181649	166181648	rs35557654:167038365:CA:C	166181855	166181856	0	7.19209e-27	-0.406443	0.0308081
cg06028079	chr2	166181716	166181715	rs35557654:167038365:CA:C	166181855	166181856	0	6.30224e-26	-0.362828	0.0282584
cg09959529	chr2	166181756	166181755	rs35557654:167038365:CA:C	166181855	166181856	0	1.83938e-30	-0.456907	0.031408
cg01298735	chr2	167965373	167965372	rs35127860:168854620:TA:T	167998110	167998111	0	1.01654e-08	-0.162925	0.0268545
cg19026692	chr2	168090912	168090911	rs11372724:169056341:C:CA	168199831	168199831	0	1.60808e-11	0.262472	0.0359798
cg10016283	chr2	168208630	168208629	rs6433044	168208697	168208697	0	2.54035e-06	0.125925	0.025738
cg24695024	chr2	168244506	168244505	rs11372724:169056341:C:CA	168199831	168199831	0	1.67362e-12	0.403827	0.0524251
cg00419220	chr2	168470963	168470962	rs11374362:169327507:C:CA	168470997	168470997	0	6.02243e-15	0.519456	0.0598197
cg01046382	chr2	168802441	168802440	rs829958	168802273	168802273	0	4.36017e-12	-0.19325	0.0256591
cg08051321	chr2	169142237	169142236	rs36016897:170077170:CA:C	169220660	169220661	0	1.95596e-09	-0.301327	0.0471405
cg06528485	chr2	169222045	169222044	2:170038261:CAT:C	169181751	169181753	0	7.45327e-08	-0.317055	0.0560133
cg24681695	chr2	169694437	169694436	rs34953339:170299057:T:TA	169442547	169442547	0	2.96651e-07	0.132389	0.0246627
cg03889939	chr2	169768065	169768064	rs34603151:170555221:T:G	169698711	169698711	0	5.11407e-08	-0.178182	0.0310502
cg24893364	chr2	169824963	169824962	2:170744293:C:CT	169887783	169887783	0	2.6734e-10	-0.182842	0.0269939
cg15461842	chr2	169891667	169891666	rs12992657:170708263:A:G	169851753	169851753	0	4.07516e-09	0.210494	0.0336876
cg17751646	chr2	169933367	169933366	rs12998456:170827112:G:A	169970602	169970602	0	3.21437e-28	0.529949	0.0386831
cg12912344	chr2	84218676	84218675	rs11335596:84432619:CA:C	84205495	84205496	0	3.03905e-31	0.536958	0.0361709
cg06963012	chr2	84433125	84433124	rs6729657:84784716:G:A	84557592	84557592	0	6.62717e-11	0.310034	0.0440734
cg00817355	chr2	84846286	84846285	rs11682890:85082526:T:G	84855402	84855402	0	1.53409e-18	1.02623	0.101912
cg21699158	chr2	85134343	85134342	rs5832669:86208092:G:GT	85980969	85980969	1	1.24433e-06	0.615522	0.121796
cg21767750	chr2	85186359	85186358	rs61342907:85413175:T:C	85186052	85186052	0	4.23212e-08	0.155496	0.0269139
cg08563570	chr2	85199380	85199379	rs11691506:85758939:T:C	85531816	85531816	0	7.37628e-08	0.629804	0.111224
cg23189291	chr2	85414157	85414156	rs140908821:85249191:C:T	85022068	85022068	0	2.25911e-07	-0.958985	0.176726
cg01948944	chr2	85414257	85414256	rs12465686:85647589:C:T	85420466	85420466	0	3.37126e-07	0.158626	0.0297028
cg15766591	chr2	85437649	85437648	rs1466036:85675604:T:C	85448481	85448481	0	1.34674e-08	0.415301	0.0690957
cg06358970	chr2	85437704	85437703	rs369685666:85665089:AGGCTGGGGGCGGGG:A	85437966	85437980	0	1.52458e-13	-0.515036	0.0633839
cg12177094	chr2	85577524	85577523	rs35410476:85739185:G:GT	85512062	85512062	0	6.73049e-07	-0.170887	0.0329269
cg18803843	chr2	85590834	85590833	rs181025242:85735081:G:A	85507958	85507958	0	2.59392e-19	-1.52128	0.146813
cg12636775	chr2	85706236	85706235	rs2043760:85921992:T:C	85694869	85694869	0	6.48645e-11	-0.206042	0.0292736
cg02425746	chr2	85851287	85851286	rs114623568:87041023:T:G	86813900	86813900	0	3.19747e-22	-2.83101	0.247147
cg02076518	chr2	85922044	85922043	rs2139199:86046509:T:C	85819386	85819386	0	1.58251e-06	-0.104192	0.0208391
cg01155138	chr2	86079121	86079120	rs70953987:86346483:CT:C	86119360	86119361	0	5.24365e-08	0.206481	0.0360142
cg03711942	chr2	86127948	86127947	rs145619727:86588857:CA:C	86361734	86361735	0	1.2555e-08	0.699598	0.116123
cg26648037	chr2	86189669	86189668	rs56964046:86391812:C:CAAAAAAA	86164689	86164689	0	2.06975e-10	0.180647	0.0264811
cg04069811	chr2	86197096	86197095	rs79402359:86385683:C:A	86158560	86158560	0	3.60679e-08	-0.194882	0.0335403
cg05560302	chr2	86336931	86336930	rs114780364:86604050:G:A	86376927	86376927	0	2.6831e-07	0.314631	0.0583776
cg08725083	chr2	86563722	86563721	rs56263644:86671074:T:C	86443951	86443951	0	6.4019e-11	0.192184	0.0272953
cg01869360	chr2	88015932	88015931	2:88272193:G:A	87972674	87972674	0	7.90856e-10	-0.210973	0.0321261
cg18715057	chr2	88170301	88170300	rs6547757:88469770:G:C	88170251	88170251	0	5.54348e-08	-0.333013	0.0582005
cg18302933	chr2	88191800	88191799	rs56774912:88535586:G:A	88236067	88236067	1	4.49106e-08	0.645094	0.111892
cg22408780	chr2	88504889	88504888	rs62159809:88833820:A:G	88534302	88534302	0	1.30628e-07	0.107621	0.0194166
cg14502181	chr2	88626479	88626478	rs7593335:88878133:A:G	88578615	88578615	0	1.2724e-06	-0.13645	0.0270266
cg13453175	chr2	88672171	88672170	rs34201319:88956416:A:AG	88656898	88656898	0	1.45086e-12	0.202935	0.0262583
cg04928670	chr2	88828947	88828946	rs58755104:89139244:G:GCA	88839731	88839731	0	4.03063e-09	-0.134074	0.0214499
cg12140527	chr2	92073223	92073222	rs1179068:92132894:C:T	91944868	91944868	0	7.97573e-21	-0.47341	0.0433074
cg09935512	chr2	94871115	94871114	2:95490959:T:C	94825214	94825214	0	1.86339e-09	-0.625007	0.097634
cg17264818	chr2	94947241	94947240	rs6707154:96216165:C:G	95550417	95550417	0	3.04077e-06	-0.28264	0.0582595
cg02378756	chr2	95123091	95123090	2:95911208:G:GGC	95245460	95245460	0	1.53541e-07	0.160649	0.0291634
cg11105575	chr2	95158755	95158754	rs112532059:95746300:G:GAT	95080555	95080555	1	1.96542e-06	-0.605873	0.122377
cg03891849	chr2	95297321	95297320	rs35740604:95911332:G:GAA	95245584	95245584	0	3.26043e-10	-0.110575	0.0164158
cg08951699	chr2	95316923	95316922	2:95957698:CGTACATATATTTATTAAATATATATATATA:C	95291950	95291980	0	1.86647e-06	0.127947	0.0257824
cg18472392	chr2	95319740	95319739	rs72819463:95831094:G:A	95165349	95165349	0	1.48335e-06	-0.362618	0.0723158
cg07261828	chr2	95334005	95334004	rs4283455:95999215:G:C	95333467	95333467	0	3.52463e-12	-0.229268	0.0302877
cg16165404	chr2	95915638	95915637	rs201201614:96561750:A:C	95896002	95896002	0	4.39575e-09	-0.287311	0.0460914
cg01142776	chr2	227718101	227718100	rs57848578:228586687:C:T	227721971	227721971	0	1.04389e-06	-0.0947713	0.0186086
cg11432540	chr2	227864156	227864155	rs2056570:228751815:G:T	227887099	227887099	0	3.00881e-07	-0.237562	0.0442803
cg03282386	chr2	229783413	229783412	rs373305348:230921595:TAA:T	230056879	230056881	0	2.75109e-07	-0.123496	0.0229368
cg08873675	chr2	230067771	230067770	rs56026429:230774106:A:C	229909390	229909390	0	2.44253e-07	-0.178372	0.0329726
cg17561932	chr2	230124908	230124907	2:231942510:AT:A	231077796	231077797	0	1.03381e-07	-0.475786	0.0850844
cg08671405	chr2	230131344	230131343	rs150717812:230996503:G:GCT	230131787	230131787	0	2.68416e-19	-0.244661	0.0236241
cg26857968	chr2	230203105	230203104	rs147934358:232008550:A:G	231143836	231143836	0	4.23204e-10	-0.468797	0.0701117
cg04659582	chr2	230411359	230411358	rs7568128:231273229:T:C	230408514	230408514	0	1.77585e-07	0.13285	0.0242529
cg14743339	chr2	230435642	230435641	rs56401717:231280381:C:T	230415666	230415666	0	1.08746e-09	-0.315114	0.048436
cg10944799	chr2	230657389	230657388	rs10190722:231027725:G:T	230163009	230163009	0	4.30714e-07	-0.185258	0.0350377
cg14397599	chr2	230798485	230798484	rs2303560:230701501:C:A	229836785	229836785	0	1.36374e-07	0.424854	0.0767767
cg16465649	chr2	230864557	230864556	2:231730671:T:TTCCCCCACCCCTGTCGCCCCCC	230865956	230865956	0	2.48879e-11	-0.232283	0.032194
cg04198215	chr2	230865711	230865710	rs3111758:231727548:A:G	230862833	230862833	0	1.84254e-07	-0.153581	0.0280777
cg04293526	chr2	230866074	230866073	rs3111758:231727548:A:G	230862833	230862833	0	1.51721e-07	-0.226101	0.0410267
cg05157335	chr2	230882014	230882013	rs62195290:231745042:A:G	230880327	230880327	0	1.19575e-07	-0.241236	0.0433772
cg24755705	chr2	231011958	231011957	rs6750230:231880112:G:A	231015397	231015397	0	9.26871e-09	0.116526	0.0191484
cg23338755	chr2	231056882	231056881	rs11399037:232027814:C:CA	231163100	231163100	0	3.55773e-08	0.107482	0.0184893
cg21598248	chr2	231182661	231182660	rs61332549:232048517:G:A	231183803	231183803	0	7.69825e-14	-0.305087	0.0370039
cg04286697	chr2	231394913	231394912	rs73996703:232237470:A:T	231372759	231372759	0	4.37419e-08	0.21808	0.0377908
cg03003052	chr2	231450695	231450694	rs77125744:232315426:C:T	231450715	231450715	0	1.82206e-12	-1.06044	0.137938
cg06281680	chr2	231483212	231483211	rs7597348	231504194	231504194	0	1.08728e-07	-0.133182	0.0238619
cg16297948	chr2	231530626	231530625	rs2916579:232421159:A:G	231556448	231556448	0	6.01072e-14	-0.267995	0.0323365
cg01962509	chr2	231614485	231614484	rs7580227:232447056:C:T	231582345	231582345	0	6.15427e-07	0.161798	0.0310581
cg18427905	chr2	231961249	231961248	rs12614743:232800149:C:A	231935439	231935439	0	1.53088e-09	-0.383047	0.0594823
cg27241845	chr2	232385661	232385660	rs2678504:233308043:C:G	232443333	232443333	0	1.24265e-07	0.328709	0.0591923
cg05682333	chr2	232409582	232409581	rs4973524:233239703:G:C	232374993	232374993	0	6.15744e-07	-0.1052	0.0201942
cg03329539	chr2	232418620	232418619	2:233305282:G:C	232440572	232440572	0	2.15405e-07	0.168305	0.0309578
cg01940273	chr2	232420225	232420224	rs2437358:233305051:T:C	232440341	232440341	0	1.77258e-15	0.333592	0.0375162
cg15986413	chr2	232488067	232488066	rs2741279:233344991:T:G	232480281	232480281	0	1.08909e-08	0.0864802	0.0142868
cg20729301	chr2	232503406	232503405	rs116273821:233379338:C:T	232514628	232514628	0	2.08583e-08	0.709272	0.119767
cg11641416	chr2	232524697	232524696	rs35832336:233411708:C:G	232546998	232546998	0	6.04997e-09	-0.181103	0.0293506
cg12344964	chr2	232524817	232524816	2:233397186:CAA:C	232532476	232532478	0	9.69368e-13	-0.110841	0.0142103
cg10364945	chr2	232569063	232569062	rs838736:234324232:G:A	233415586	233415586	0	3.58005e-08	0.0774408	0.0133245
cg02806452	chr2	232634361	232634360	rs1404606:233487327:G:A	232622617	232622617	0	3.12548e-08	-0.149895	0.0256682
cg06842071	chr2	232634751	232634750	rs35684368:233468870:TC:T	232604160	232604161	0	2.37919e-07	-0.163107	0.0301195
cg24936500	chr2	232634928	232634927	rs35684368:233468870:TC:T	232604160	232604161	0	3.1076e-09	-0.121813	0.0193302
cg24033750	chr2	232678828	232678827	rs114662139:233532423:C:T	232667713	232667713	0	5.28818e-12	-1.36118	0.181571
cg07230446	chr2	232697013	232697012	rs283487:233644011:A:G	232779301	232779301	0	8.44323e-09	0.18071	0.0296049
cg00934464	chr2	232697623	232697622	rs80020039:233560454:C:A	232695744	232695744	0	1.22477e-08	0.195554	0.0324324
cg09550341	chr2	232907321	232907320	rs10176930:233699519:T:C	232834809	232834809	0	9.24361e-08	-0.135944	0.0242091
cg27604702	chr2	232928379	232928378	2:233787782:G:GA	232923072	232923072	0	5.83703e-10	0.420938	0.0635362
cg02486558	chr2	232988301	232988300	rs142264252:233857699:G:GTA	232992989	232992989	0	4.98144e-10	0.730268	0.109726
cg27165095	chr2	233094712	233094711	rs6437089	233097805	233097805	0	2.78315e-09	-0.145523	0.0230139
cg05242270	chr2	233170178	233170177	rs35310041:233981239:C:T	233116529	233116529	0	5.11872e-07	0.400486	0.0762855
cg08900677	chr2	233240704	233240703	rs1045100:234203597:T:C	233294951	233294951	0	6.59892e-08	-0.152467	0.026816
cg03197594	chr2	36967237	36967236	rs13429942:37261739:C:G	37034596	37034596	0	1.46092e-08	0.179904	0.0300135
cg25176297	chr2	37005180	37005179	rs11688446:37197734:G:T	36970591	36970591	0	9.83773e-41	0.942607	0.0507383
cg09722212	chr2	37005454	37005453	rs11688446:37197734:G:T	36970591	36970591	0	2.45991e-34	0.601295	0.0375007
cg02576345	chr2	37083956	37083955	rs80213738:37739226:G:A	37512083	37512083	0	4.94406e-09	-0.748085	0.120459
cg11429997	chr2	37157144	37157143	rs34418950:37390980:G:GT	37163837	37163837	0	6.68892e-14	0.145557	0.0176025
cg20393918	chr2	37812358	37812357	rs1529554:38030111:A:T	37802968	37802968	0	1.17019e-13	-0.326959	0.0400106
cg20836616	chr2	37838151	37838150	rs34046279:38066818:C:CA	37839675	37839675	0	7.86285e-10	0.19699	0.0299917
cg05761971	chr2	37950535	37950534	rs141495323:38351273:C:G	38124131	38124131	0	1.26767e-09	-0.930068	0.143613
cg24752487	chr2	38097047	38097046	rs162552:38323610:C:T	38096468	38096468	0	2.68147e-07	-0.1725	0.0320055
cg11130441	chr2	38131006	38131005	rs149766790:38426314:T:TTGTCTAC	38199172	38199172	0	7.7074e-43	-2.27316	0.116901
cg26727710	chr2	38171673	38171672	rs3057375:38401026:A:ACTGT	38173884	38173884	0	1.22226e-07	-0.219414	0.0394862
cg20171986	chr2	38603600	38603599	rs17022893:38768724:T:C	38541582	38541582	0	1.33221e-10	0.306912	0.0444515
cg18218257	chr2	38875573	38875572	rs114727662:39532288:G:A	39305147	39305147	0	4.59337e-07	-0.421485	0.0799264
cg16981027	chr2	38966751	38966750	rs186779726:38864684:A:C	38637542	38637542	0	4.91586e-07	0.492168	0.0935923
cg02710105	chr2	39437208	39437207	rs186802061:39716215:G:T	39489074	39489074	0	3.78805e-16	0.379451	0.0414578
cg03659856	chr2	39664590	39664589	rs3032160:39945333:T:TCTC	39718193	39718193	0	1.85008e-07	0.138643	0.0253508
cg16911892	chr2	40193006	40193005	rs13389962:40414035:G:A	40186895	40186895	0	1.16884e-10	-0.274931	0.039679
cg01051240	chr2	41736248	41736247	rs7572321	41752285	41752285	0	2.05501e-10	-0.221874	0.0325183
cg08613765	chr2	41871225	41871224	rs11676056	41873398	41873398	0	5.42822e-10	-0.206031	0.0310333
cg25821367	chr2	41928629	41928628	rs4952383:42125499:G:A	41898359	41898359	0	1.18122e-07	-0.116697	0.0209739
cg05991926	chr2	41932474	41932473	rs61704177:42162481:T:A	41935341	41935341	0	9.34898e-20	-0.223114	0.0211899
cg25641759	chr2	42053483	42053482	rs33928725:42240629:CAAA:C	42013489	42013492	0	7.76951e-14	0.241704	0.0293219
cg12940291	chr2	42133121	42133120	rs963406:42355947:C:A	42128807	42128807	0	6.58123e-07	0.25813	0.0496899
cg12548555	chr2	42183989	42183988	rs377599324:42944267:GTTT:G	42717127	42717130	0	1.04811e-06	-0.155175	0.0304743
cg06653538	chr2	42239125	42239124	rs13387657:42607911:C:G	42380771	42380771	0	5.74039e-07	0.145309	0.0278114
cg17510733	chr2	42285889	42285888	rs77579563:42492815:A:AAGCCATT	42265675	42265675	0	1.85616e-20	-0.339283	0.0314337
cg13049960	chr2	42810262	42810261	rs62140179:43080470:G:A	42853330	42853330	0	2.8562e-09	0.236846	0.0374863
cg24789596	chr2	42810928	42810927	rs6750539:43037672:C:T	42810532	42810532	0	5.96943e-08	0.140048	0.024542
cg03125400	chr2	43100800	43100799	rs115425376:43351876:C:T	43124737	43124737	0	1.42737e-17	0.562173	0.0579519
cg24601559	chr2	43101399	43101398	rs114309494:43358386:G:A	43131247	43131247	0	1.27804e-09	0.555895	0.0858575
cg09489567	chr2	43136915	43136914	2:43368691:ATT:A	43141552	43141554	0	1.48781e-10	0.181837	0.0264154
cg23157415	chr2	176188328	176188327	rs13011603:177051871:A:T	176187143	176187143	0	3.3759e-08	0.120957	0.0207689
cg24386890	chr2	176188344	176188343	rs113689278:177053093:G:T	176188365	176188365	0	2.75956e-18	0.335389	0.0336304
cg27008248	chr2	177137907	177137906	rs7574502:178002644:A:G	177137916	177137916	0	2.88275e-15	-0.391251	0.0444134
cg27440866	chr2	177333035	177333034	rs60835278:178355599:T:A	177490871	177490871	0	2.31238e-10	-0.182677	0.026861
cg06455606	chr2	177392838	177392837	rs1947176:177399237:G:T	176534509	176534509	0	1.48326e-07	-0.0808085	0.0146502
cg26082400	chr2	177619110	177619109	rs72648258:179410704:G:A	178545977	178545977	0	6.45601e-13	-1.40234	0.178142
cg15776446	chr2	178194010	178194009	rs4019606:179040167:CT:C	178175440	178175441	0	8.44796e-10	0.100568	0.0153437
cg14905039	chr2	178315684	178315683	rs62179165:179149749:A:G	178285022	178285022	0	1.42619e-07	-0.159004	0.0287833
cg10949583	chr2	178479014	178479013	rs2366577:179371982:C:T	178507255	178507255	0	8.52386e-08	-0.254935	0.0452627
cg20975419	chr2	179411135	179411134	rs1400825:180275888:T:C	179411161	179411161	0	2.6531e-26	-1.08678	0.0837251
cg04967250	chr2	180007438	180007437	rs2678936:180872179:G:C	180007452	180007452	0	3.45318e-19	0.309665	0.0300208
cg16662459	chr2	180063649	180063648	rs33921668:180876062:A:ATT	180011335	180011335	0	2.9182e-12	0.263524	0.034658
cg16068848	chr2	180607496	180607495	rs11390004:181473685:C:CA	180608958	180608958	0	1.07367e-10	0.209847	0.0302167
cg01124477	chr2	180873545	180873544	rs35101921:181768801:C:G	180904074	180904074	0	1.53045e-08	-0.672355	0.112345
cg01907838	chr2	180980099	180980098	rs10187842:181899515:G:A	181034788	181034788	0	7.44164e-14	-0.641222	0.0777181
cg11080831	chr2	181516894	181516893	exm250124	181534370	181534370	0	2.6689e-19	0.391606	0.0378095
cg09705174	chr2	181892183	181892182	exm250304	181892173	181892173	0	1.15099e-07	0.127194	0.0228381
cg09934663	chr2	182427699	182427698	rs13026896:183395871:C:T	182531144	182531144	0	1.99228e-08	-0.206555	0.0348238
cg05616069	chr2	182867630	182867629	rs12693327:183748346:A:G	182883618	182883618	0	1.69278e-10	-0.118751	0.0173118
cg25300805	chr2	183124206	183124205	rs72898581:184076053:T:A	183211325	183211325	0	2.97297e-09	-0.341383	0.0540988
cg03602746	chr2	187003169	187003168	2:187890943:G:GTA	187026216	187026216	0	5.94165e-09	0.148556	0.0240619
cg26466380	chr2	187554141	187554140	rs4667171:188430691:G:T	187565964	187565964	0	7.17864e-09	0.219224	0.0357253
cg16297736	chr2	187580511	187580510	rs68040026:188396653:AT:A	187531926	187531927	0	2.5742e-13	0.365901	0.0455444
cg17066056	chr2	187615590	187615589	rs58155307:188480265:T:C	187615538	187615538	0	3.61267e-13	-1.21838	0.152786
cg19186126	chr2	188277503	188277502	rs17262471:188855089:C:T	187990362	187990362	0	2.23326e-07	-0.696977	0.128384
cg16256414	chr2	188292625	188292624	rs72908679:189760990:A:C	188896264	188896264	0	7.28835e-08	0.150131	0.0265015
cg12268101	chr2	188293665	188293664	rs66941312:189065920:CA:C	188201193	188201194	0	4.09921e-16	-0.308422	0.0337463
cg07077227	chr2	188293773	188293772	rs34964061:189117523:CAT:C	188252796	188252798	0	1.35031e-13	-0.238355	0.0292574
cg26440297	chr2	188293806	188293805	rs34964061:189117523:CAT:C	188252796	188252798	0	2.06705e-14	-0.250036	0.0295126
cg26011364	chr2	101474838	101474837	rs4851460:102113364:A:T	101496902	101496902	0	1.91985e-13	-0.153685	0.0190078
cg20146536	chr2	101479744	101479743	rs35683975:102108142:GA:G	101491680	101491681	0	1.66696e-07	0.120771	0.0219938
cg21322862	chr2	101675563	101675562	rs11279758:102292016:CCTGTGG:C	101675554	101675560	0	1.21774e-23	-0.90934	0.0758717
cg06095752	chr2	101696781	101696780	rs11341237:102357626:AT:A	101741164	101741165	0	1.02e-07	-0.126355	0.0225845
cg06291983	chr2	101821565	101821564	rs200185326:102146637:AC:A	101530175	101530176	0	4.87445e-08	1.13509	0.197462
cg08934602	chr2	101902444	101902443	rs187798246:102121593:C:G	101505131	101505131	0	9.81427e-07	0.434011	0.0849902
ch.2.2149939F	chr2	101975974	101975973	rs58626985:102565572:C:T	101949110	101949110	0	5.39775e-12	-0.217472	0.0290235
cg02071828	chr2	102302043	102302042	rs115468265:102942920:A:C	102326460	102326460	0	3.99568e-10	0.175919	0.026267
cg24276374	chr2	102305141	102305140	rs11676124:102941338:T:C	102324878	102324878	0	1.91827e-06	0.0942451	0.0190149
cg12848740	chr2	102310043	102310042	rs34644791:102917994:G:GT	102301534	102301534	0	4.54842e-11	-0.177769	0.0250233
cg11916609	chr2	102311029	102311028	rs77234507:103554661:T:C	102938203	102938203	0	1.22903e-07	0.668157	0.120268
cg11333242	chr2	102356278	102356277	rs11676124:102941338:T:C	102324878	102324878	0	9.49154e-16	0.153651	0.0170767
cg23450938	chr2	102356333	102356332	rs6737668:103093081:C:T	102476622	102476622	0	5.42704e-07	0.0793102	0.015144
cg15704872	chr2	102623384	102623383	rs142029737:104166447:G:A	103549989	103549989	0	2.05461e-08	0.88647	0.149611
cg13723230	chr2	102848732	102848731	rs62151011:103741163:G:A	103124705	103124705	0	4.09433e-08	0.162735	0.0281338
cg12668323	chr2	102987256	102987255	rs76820986:103984271:T:G	103367813	103367813	0	3.43306e-08	0.610497	0.104887
cg04043747	chr2	103161159	103161158	rs1534454:103777717:A:T	103161259	103161259	0	1.83648e-07	-0.196123	0.0358505
cg02808606	chr2	103959040	103959039	rs79656161:103979818:T:C	103363360	103363360	0	9.77336e-09	0.35122	0.0578157
cg13872005	chr2	104659156	104659155	rs10640378:105274829:G:GAGA	104658371	104658371	0	2.90525e-09	-0.206249	0.0326608
cg19235893	chr2	104877154	104877153	rs112339774:105495676:G:GGA	104879218	104879218	0	1.28564e-17	0.261429	0.0269014
cg24470804	chr2	105037958	105037957	rs11326307:105655687:TA:T	105039229	105039230	0	8.38726e-14	0.08151	0.00990423
cg09773141	chr2	105066066	105066065	2:105688868:C:CT	105072410	105072410	0	2.1379e-11	-0.292648	0.0404046
cg01436700	chr2	105337446	105337445	rs2679858:105927612:A:C	105311155	105311155	0	6.39774e-08	0.0844081	0.014829
cg10041288	chr2	105812864	105812863	rs2889605:106525073:T:C	105908617	105908617	0	3.64258e-07	0.0928999	0.0174502
cg01113409	chr2	105929634	105929633	rs10469862	105893451	105893451	0	4.53144e-09	-0.268873	0.0431751
cg11908131	chr2	106068590	106068589	rs12993816:106684028:C:A	106067572	106067572	0	2.90206e-07	0.19365	0.0360432
cg24110005	chr2	106104249	106104248	rs17032423:106731416:C:T	106114960	106114960	0	5.51632e-09	0.651794	0.105321
cg12800781	chr2	106869802	106869801	rs2058359:107810582:T:G	107194126	107194126	0	4.76126e-08	-0.107223	0.0186369
cg27431625	chr2	107063076	107063075	2:107685648:C:A	107069192	107069192	0	1.60271e-14	0.317803	0.0373185
cg22739541	chr2	108218568	108218567	rs13385082:108875471:G:T	108259015	108259015	0	2.52823e-06	-0.0883736	0.0180588
cg09590161	chr2	108448160	108448159	rs35997658:109057011:CA:C	108440555	108440556	0	1.88671e-16	0.333595	0.0359871
cg12964295	chr2	108448557	108448556	rs11123709:109217352:C:T	108600896	108600896	0	8.79607e-28	0.438816	0.0324201
cg20693104	chr2	108533267	108533266	rs2118446:109145808:T:C	108529352	108529352	0	2.46516e-08	-0.159297	0.0270537
cg23176246	chr2	108535137	108535136	2:109129376:C:T	108512920	108512920	0	3.64575e-11	0.37672	0.0527254
cg13084292	chr2	108584402	108584401	rs55803150:109084523:CT:C	108468067	108468068	0	4.81354e-08	-0.16528	0.0287393
cg10132901	chr2	237590874	237590873	rs146534321:238499863:A:AAATTCTTCAGGAGACTCT	237591220	237591220	0	4.91839e-10	-0.145717	0.0218865
cg16057507	chr2	237598543	237598542	rs13430910:238524416:T:C	237615773	237615773	0	9.79265e-09	-0.144103	0.0237229
cg25516222	chr2	237617743	237617742	rs143207873:238517176:C:A	237608533	237608533	0	1.05406e-09	0.200468	0.0307854
cg19953352	chr2	237630102	237630101	rs58257284:238538395:G:A	237629752	237629752	0	2.48271e-16	-0.339298	0.0367852
cg13184448	chr2	237739215	237739214	rs3820808:238647805:C:G	237739162	237739162	0	3.27586e-10	-0.444526	0.0660021
cg02349186	chr2	237923672	237923671	rs34197316:238830572:C:T	237921930	237921930	0	3.18426e-07	-0.23898	0.0446462
cg03098024	chr2	237924136	237924135	rs62194465:238830780:G:A	237922138	237922138	0	5.073e-11	-0.466434	0.0658434
cg20847989	chr2	238032964	238032963	rs78672848:238980822:A:G	238072181	238072181	0	4.66872e-26	-1.92966	0.149721
cg09095748	chr2	238100065	238100064	rs5839683:239010455:GGAA:G	238101814	238101817	0	2.32425e-13	-0.21121	0.0262312
cg01112020	chr2	238100346	238100345	rs71402746:238900512:C:CT	237991870	237991870	0	1.15555e-07	0.133897	0.0240453
cg20537511	chr2	238109186	238109185	rs13385941:239028393:A:C	238119752	238119752	0	8.47229e-08	0.16282	0.0289016
cg11904906	chr2	238231392	238231391	rs76554193:239196607:T:C	238287966	238287966	0	1.35895e-12	2.08034	0.268777
cg23497383	chr2	238231542	238231541	rs76554193:239196607:T:C	238287966	238287966	0	9.6242e-15	1.68238	0.195546
cg06594010	chr2	238241344	238241343	rs72992741:239133641:A:G	238225000	238225000	0	9.22492e-08	-0.0896957	0.015972
cg26535834	chr2	238518347	238518346	rs12613816:240119809:T:A	239198113	239198113	0	5.57229e-07	0.125866	0.0240603
cg01910846	chr2	238728325	238728324	rs75039188:239651719:G:A	238743078	238743078	0	2.57532e-07	0.285184	0.0528278
cg18534971	chr2	238771439	238771438	rs59950910:239680747:T:C	238772106	238772106	0	8.08265e-11	0.489187	0.0699075
cg16459149	chr2	238949457	238949456	rs6741317:239862720:G:A	238941024	238941024	0	5.59826e-08	0.225721	0.0394632
cg27214333	chr2	239015828	239015827	rs11693512:239950642:A:G	239028946	239028946	0	2.98952e-09	-0.224527	0.0355868
cg00011345	chr2	239036194	239036193	rs5017734:239960194:G:A	239038498	239038498	0	1.9749e-15	-0.338821	0.038183
cg25683068	chr2	239193473	239193472	rs149480929:240864276:G:A	239924859	239924859	0	6.90645e-08	-0.48009	0.0845793
cg06223736	chr2	239220999	239220998	rs617829:240142864:T:C	239221168	239221168	0	1.21408e-22	0.381874	0.032886
cg17523053	chr2	239429667	239429666	rs10190778:240352281:A:G	239430587	239430587	0	3.08674e-08	-0.190603	0.0326247
cg06629612	chr2	239507769	239507768	rs2129213:240429428:C:T	239507734	239507734	0	2.72942e-11	-0.363297	0.0504707
cg00439733	chr2	240030759	240030758	rs10933551:240970382:G:C	240030965	240030965	0	9.08277e-07	0.110868	0.021638
cg23481929	chr2	240194910	240194909	rs72133392:241138158:CCACTGTCCAT:C	240198741	240198751	0	1.05057e-18	-0.997591	0.0984588
cg23481929	chr2	240194910	240194909	rs11308220:240451707:GC:G	239530013	239530014	1	1.08247e-06	-0.562863	0.110695
cg15677797	chr2	10044151	10044150	rs6717452	10057986	10057986	0	1.06495e-34	1.1613	0.0717933
cg18825594	chr2	10044524	10044523	rs372827624:10183748:TGCC:T	10043621	10043624	0	1.91826e-09	-0.285551	0.044646
cg19361181	chr2	10475918	10475917	rs7591360:10616214:C:T	10476088	10476088	0	1.48471e-07	0.257264	0.0466423
cg20729877	chr2	10514944	10514943	rs115150225:10662590:T:C	10522464	10522464	0	2.86694e-07	-0.133686	0.0248702
cg02813268	chr2	10530540	10530539	rs116135538:10671348:G:A	10531222	10531222	0	2.09067e-10	0.202603	0.029708
cg01172315	chr2	10812930	10812929	rs1686419:10951169:A:G	10811043	10811043	0	1.81714e-09	-0.0714061	0.011146
cg20868617	chr2	10833780	10833779	2:11240404:A:AGG	11100278	11100278	0	2.21276e-08	-0.272293	0.0460723
cg08804096	chr2	11099440	11099439	rs55764694:11246298:G:A	11106172	11106172	0	3.46318e-08	0.120616	0.0207289
cg02544320	chr2	11124564	11124563	rs67886823:11271162:CA:C	11131036	11131037	0	4.66696e-10	-0.0982554	0.0147358
cg00471645	chr2	11130067	11130066	rs140903242:11280200:G:A	11140074	11140074	0	2.14355e-07	0.292959	0.0538764
cg03251967	chr2	11133166	11133165	rs10166997:11270051:C:G	11129925	11129925	0	9.50193e-07	0.123174	0.0240868
cg00001594	chr2	11344580	11344579	rs79394294:12335438:T:C	12195312	12195312	0	7.95067e-11	1.45717	0.208147
cg03997139	chr2	11345427	11345426	rs143973958:11455595:TA:T	11315469	11315470	0	2.41606e-12	0.302886	0.0396585
cg13670878	chr2	11541678	11541677	rs12623299:11685558:A:G	11545432	11545432	0	1.95505e-09	0.203663	0.0318612
cg12568421	chr2	11591712	11591711	exm172924	11587381	11587381	0	2.43549e-09	-0.272722	0.0429526
cg11855727	chr2	11670335	11670334	rs139116452:11283314:A:G	11143188	11143188	0	1.28315e-07	-0.369014	0.0665311
cg02069619	chr2	11745141	11745140	rs2358126:11930279:A:G	11790153	11790153	0	1.53355e-08	0.633016	0.105779
cg02069619	chr2	11745141	11745140	rs11895321:11865066:A:G	11724940	11724940	1	1.5068e-07	-0.864026	0.156738
cg25204319	chr2	12844690	12844689	rs4669885:12973019:C:G	12832893	12832893	0	2.39018e-08	0.0986333	0.0167333
cg13129172	chr2	13260581	13260580	rs143612412:13404778:CT:C	13264653	13264654	0	7.77884e-09	-0.144934	0.0236805
cg04783943	chr2	14275132	14275131	rs2014149	14399353	14399353	0	9.50672e-17	0.203248	0.0216574
cg25556885	chr2	14960497	14960496	rs705102:15100574:A:G	14960450	14960450	0	1.13048e-20	0.365221	0.0335851
cg25758806	chr2	15243134	15243133	rs4047463:16388157:AT:A	16206889	16206890	0	4.28087e-07	-0.175165	0.0331205
cg26493990	chr2	15693891	15693890	rs6754090:15833720:A:G	15693596	15693596	0	7.84642e-09	-0.275136	0.0449666
cg12631932	chr2	15863574	15863573	rs11685493:16003716:A:G	15863592	15863592	0	8.5659e-07	-0.297706	0.0579562
cg14705391	chr2	16021081	16021080	rs57702878:16161230:GCAGGCCAGGCA:G	16021108	16021119	0	7.66975e-12	-0.512106	0.0689287
cg11350852	chr2	16056268	16056267	rs4832591	16425328	16425328	0	1.05532e-06	-0.102725	0.02018
cg23276673	chr2	135819753	135819752	2:136485012:CTTTTTTTTTTTTTTTTTTTTTTTTTT:C	135727442	135727468	0	5.45761e-07	-0.181448	0.034655
cg05438888	chr2	136060390	136060389	rs59352982:136818059:C:CA	136060489	136060489	0	3.86294e-09	0.121495	0.0194114
cg24345725	chr2	138448096	138448095	rs4596033:139205924:T:C	138448354	138448354	0	1.27976e-09	-0.301048	0.0464986
cg13671078	chr2	138827465	138827464	rs34929172:139597582:A:AT	138840012	138840012	0	5.79118e-22	-1.03654	0.091259
cg13671078	chr2	138827465	138827464	rs377728689:140478764:TA:T	139721195	139721196	1	3.30971e-07	1.21059	0.226515
cg17413870	chr2	142132973	142132972	rs1523706:142963846:C:T	142206277	142206277	0	6.40058e-07	-0.23369	0.0449324
cg20955027	chr2	142811954	142811953	rs28883024:143569218:G:A	142811649	142811649	0	4.87489e-11	0.265639	0.0374595
cg17592268	chr2	143720348	143720347	rs62154916:143541304:A:C	142783735	142783735	0	1.12928e-07	0.33597	0.0602811
cg17751438	chr2	144517631	144517630	2:145275184:G:C	144517617	144517617	0	8.47598e-19	0.470733	0.0462982
cg05322294	chr2	144520586	144520585	rs80181138:145946128:T:G	145188561	145188561	0	1.65684e-07	-0.149621	0.0272413
cg26205321	chr2	145351084	145351083	rs150742893:146422302:A:G	145664734	145664734	0	1.4308e-06	0.381722	0.0760031
cg16900740	chr2	145769187	145769186	rs200994231:146526556:T:TTATC	145768988	145768988	0	1.11481e-13	0.279847	0.03421
cg14426421	chr2	147843669	147843668	rs199940101:148636013:C:CT	147878444	147878444	0	1.05708e-09	0.154403	0.0237133
cg14974397	chr2	147844537	147844536	rs75633275:147804065:C:G	147046497	147046497	0	7.69923e-07	-0.239203	0.0463546
cg14926149	chr2	147845251	147845250	rs146282089:149157530:G:T	148399961	148399961	0	1.43187e-06	0.271522	0.0540633
cg08992565	chr2	147846291	147846290	rs11284106:148636477:TA:T	147878908	147878909	0	8.80751e-13	-0.248026	0.0317289
cg23700062	chr2	147938802	147938801	rs13011526:149566043:T:C	148808474	148808474	0	1.6616e-06	-0.166864	0.0334475
cg05293639	chr2	148546126	148546125	rs76983115:149307618:C:A	148550049	148550049	0	7.02486e-08	0.322115	0.0567837
cg18195902	chr2	148590731	148590730	rs10675228:149359248:C:CAAAGCT	148601679	148601679	0	4.19658e-09	-0.227145	0.0363861
cg27016385	chr2	150137159	150137158	rs11688905:150994445:G:C	150137931	150137931	0	4.13988e-11	0.153289	0.0215247
cg26162160	chr2	68302264	68302263	rs73935339:68529416:G:A	68302284	68302284	0	7.36038e-08	-0.314475	0.055532
cg12452813	chr2	68448761	68448760	rs4671819:67876780:A:G	67649648	67649648	1	1.19824e-06	0.648508	0.128109
cg12800200	chr2	69033171	69033170	rs6724990:69247789:T:C	69020657	69020657	0	1.2416e-07	-0.169508	0.0305232
cg18490567	chr2	69182127	69182126	rs6724204:69409265:A:G	69182133	69182133	0	8.24598e-17	-0.414697	0.0440769
cg25195673	chr2	69387814	69387813	rs11690738:69530084:G:T	69302952	69302952	0	8.19687e-08	0.118736	0.0210506
cg07591442	chr2	69387974	69387973	rs11338408:69762538:CA:C	69535406	69535407	0	3.06383e-10	0.23207	0.0343924
cg08792812	chr2	69782070	69782069	rs201747072:69984066:A:ATTT	69756934	69756934	0	1.18721e-07	-0.133108	0.0239279
cg06635952	chr2	69798738	69798737	rs35362436:70073087:AT:A	69845955	69845956	0	8.86978e-11	-0.190624	0.0273088
cg19859335	chr2	69915021	69915020	rs62151576:70735435:G:A	70508303	70508303	0	6.44861e-07	0.236159	0.0454213
cg07425115	chr2	70133666	70133665	rs61657625:70366499:G:GT	70139367	70139367	0	9.56197e-07	-0.102227	0.019996
cg14711927	chr2	70141900	70141899	rs61657625:70366499:G:GT	70139367	70139367	0	4.9074e-10	-0.20273	0.0304479
cg16213087	chr2	70143328	70143327	rs6708697:70391138:A:T	70164006	70164006	0	5.72107e-08	-0.369166	0.0645927
cg21989299	chr2	70257415	70257414	rs141290240:70513648:C:CT	70286516	70286516	0	7.59764e-13	0.445886	0.0568498
cg01926706	chr2	70294853	70294852	rs12988679:70347251:G:A	70120119	70120119	0	1.14213e-06	0.121988	0.0240472
cg27490277	chr2	70426485	70426484	exm199763	70212810	70212810	0	6.48692e-32	-2.79831	0.185304
cg10673353	chr2	70560596	70560595	rs79025867:70786881:C:T	70559749	70559749	0	3.12905e-10	0.157733	0.0233897
cg09922001	chr2	70704067	70704066	rs34065251:70919874:G:GA	70692742	70692742	0	8.98051e-08	-0.111254	0.019791
cg08132931	chr2	70767831	70767830	rs35986233:70271143:A:C	70044011	70044011	0	3.38614e-16	0.593268	0.0646854
cg18144593	chr2	70889282	70889281	rs80164785:70815084:G:C	70587952	70587952	0	6.80701e-09	0.620381	0.100925
cg14339650	chr2	71157442	71157441	rs357725:71384353:G:T	71157223	71157223	0	7.33016e-10	-0.174693	0.0265426
cg16913421	chr2	71405824	71405823	rs34086328:71510543:GCTT:G	71283413	71283416	0	9.41007e-17	-0.632142	0.0673466
cg00013475	chr2	71453592	71453591	rs357771:71420965:C:T	71193835	71193835	0	3.78945e-09	-0.142099	0.0226896
cg01958405	chr2	71465989	71465988	rs62143765:71706294:G:A	71479164	71479164	0	5.25004e-07	-0.165742	0.0316042
cg03674127	chr2	71466741	71466740	rs71414897:71445969:G:A	71218839	71218839	0	1.17258e-14	0.941141	0.109823
cg11027058	chr2	71466758	71466757	rs34316027:71598809:AT:A	71371679	71371680	0	1.54379e-21	1.17202	0.104655
cg03170698	chr2	71466887	71466886	rs78820776:71494353:T:C	71267223	71267223	0	2.49241e-10	0.351702	0.0518223
cg05221922	chr2	71608757	71608756	rs11893178:71836766:T:C	71609636	71609636	0	4.7451e-07	-0.143429	0.0272349
cg07972565	chr2	71711261	71711260	rs1896497:71938394:G:A	71711264	71711264	0	6.8985e-07	0.137293	0.0264816
cg24516106	chr2	71852284	71852283	rs139130924:72121811:C:T	71894681	71894681	0	2.80506e-08	0.607666	0.103665
cg21610384	chr2	72008571	72008570	rs4405788	72008558	72008558	0	8.49554e-07	0.0931958	0.0181366
cg02066144	chr2	72824998	72824997	rs151033011:73112051:CTT:C	72884922	72884924	0	7.9055e-08	0.189137	0.033487
cg14556303	chr2	216372314	216372313	rs16853861:216241585:A:T	215376862	215376862	0	1.02438e-08	0.792737	0.130698
cg16997451	chr2	216408806	216408805	rs35548201:217273250:T:TG	216408527	216408527	0	1.78626e-07	0.118431	0.0216254
cg15642852	chr2	216412104	216412103	rs284565:217358806:C:G	216494083	216494083	0	6.33442e-07	-0.156222	0.0300242
cg00319798	chr2	216535652	216535651	rs71047969:216913107:TA:T	216048384	216048385	0	4.65197e-07	0.162905	0.030908
cg19675223	chr2	216695550	216695549	rs1978345	216697639	216697639	0	5.63545e-07	0.118373	0.0226386
cg10958904	chr2	216746421	216746420	rs6435951:217608292:A:T	216743569	216743569	0	5.55456e-12	0.149713	0.0199942
cg18204589	chr2	217074370	217074369	rs35607529:217939897:G:A	217075174	217075174	0	7.90313e-26	-0.585606	0.0457402
cg17013513	chr2	217224436	217224435	rs79248360:217209797:C:T	216345074	216345074	0	1.68493e-08	-0.328196	0.0550172
cg12854901	chr2	217945036	217945035	rs10932708:218162666:T:C	217297943	217297943	0	1.11884e-07	-0.425137	0.0762532
cg05083539	chr2	218286054	218286053	rs11696005	218364918	218364918	0	2.18733e-07	0.0986354	0.0181538
cg07475654	chr2	218286722	218286721	rs201794824:219103313:CTTT:C	218238590	218238593	0	1.46741e-06	-0.099514	0.0198362
cg15100426	chr2	218322710	218322709	rs6741757:219182748:T:C	218318025	218318025	0	1.50701e-18	-0.376408	0.0373694
cg08187773	chr2	218385085	218385084	rs2276631	218384290	218384290	0	1.72966e-08	0.111175	0.0186535
cg14645545	chr2	218387829	218387828	rs2290708:219252377:C:T	218387654	218387654	0	2.85474e-08	0.194685	0.0332326
cg20809991	chr2	218398194	218398193	rs1809231:219262179:G:C	218397456	218397456	0	8.43302e-08	-0.219739	0.0389983
cg14110710	chr2	218567327	218567326	rs140347553:219417641:AAAAC:A	218552918	218552922	0	1.10309e-14	-0.242115	0.0282182
cg27369013	chr2	218608002	218608001	rs72966038:219656190:G:A	218791467	218791467	0	5.65304e-12	0.251637	0.0336204
cg08111152	chr2	218781609	218781608	rs34491963:219518298:CA:C	218653575	218653576	0	4.51194e-09	0.155844	0.0250217
cg22587479	chr2	218873505	218873504	rs10932786:219753136:C:T	218888414	218888414	0	9.21928e-10	-0.538693	0.0823995
cg00011225	chr2	218873593	218873592	rs7571111:219768956:T:C	218904234	218904234	0	4.22516e-08	-0.605789	0.104846
cg00518417	chr2	218880376	218880375	rs3840475:219743789:TC:T	218879067	218879068	0	7.38169e-08	0.2732	0.0482485
cg12001120	chr2	218886621	218886620	rs10177996	218881839	218881839	0	6.7311e-07	0.149455	0.0287975
cg25520960	chr2	218999263	218999262	Ancestry_WORLD_Cluster20_chr2_219863656	218998934	218998934	0	9.15519e-08	-0.36668	0.0652758
cg09297636	chr2	219059189	219059188	rs9288539:219945274:T:A	219080552	219080552	0	1.71114e-08	0.129807	0.0217716
cg00303740	chr2	219187580	219187579	rs62191828:220058825:A:G	219194103	219194103	0	6.24549e-09	0.125464	0.0203541
cg01693157	chr2	219253552	219253551	rs201660200:220107011:G:GT	219242289	219242289	0	2.39606e-12	0.300543	0.039344
cg06446599	chr2	219274732	219274731	rs7569439	219725911	219725911	0	3.94429e-07	-0.119359	0.0224931
cg03970036	chr2	219309511	219309510	rs6436133:220174523:A:G	219309801	219309801	0	1.27191e-10	0.437551	0.0632932
cg01382864	chr2	219309530	219309529	rs71040432:220178737:A:AT	219314015	219314015	0	8.50573e-10	0.548461	0.0836955
cg04422168	chr2	219309561	219309560	rs138061501:220234308:C:T	219369586	219369586	0	2.83997e-11	1.46242	0.203371
cg14891200	chr2	219332943	219332942	rs11330293:220185045:CT:C	219320323	219320324	0	5.94579e-08	0.157192	0.0275423
cg08385266	chr2	28546259	28546258	rs17006979:28769244:G:A	28546377	28546377	0	7.72951e-08	-0.108869	0.0192594
cg03441835	chr2	28751281	28751280	rs10198789:28968811:C:T	28745945	28745945	0	1.69077e-09	0.088567	0.0137946
cg08401837	chr2	28956201	28956200	rs112246861:29116882:C:A	28894016	28894016	0	1.70546e-24	-0.680973	0.0553449
cg22748895	chr2	28956570	28956569	rs112246861:29116882:C:A	28894016	28894016	0	4.09511e-37	-1.29442	0.0755931
cg17393424	chr2	28980479	28980478	rs11896479:29250075:C:T	29027209	29027209	0	5.19771e-07	0.118485	0.0225836
cg18363294	chr2	29901078	29901077	rs139598750:30107020:ATC:A	29884154	29884156	0	2.4648e-09	0.17427	0.027457
cg04253876	chr2	30230893	30230892	rs9798481:30473839:A:C	30250973	30250973	0	5.4136e-15	0.207851	0.0238856
cg20662616	chr2	30231778	30231777	rs79741237:29711214:G:A	29488348	29488348	0	3.37303e-09	0.348307	0.0554135
cg04351272	chr2	30447150	30447149	rs829636:30737801:T:G	30514935	30514935	0	2.04234e-09	0.184848	0.0289562
cg10995359	chr2	30447305	30447304	rs78995923:30592495:G:A	30369629	30369629	0	1.4505e-12	0.681122	0.088132
cg10365597	chr2	30707132	30707131	rs72800122:30922436:A:G	30699570	30699570	0	8.92974e-20	-0.44641	0.0423668
cg04132353	chr2	31217484	31217483	rs9752145:31428900:A:T	31206034	31206034	0	3.60842e-09	0.131333	0.0209384
cg21560396	chr2	31440954	31440953	rs77781418:31508999:G:A	31286133	31286133	0	1.38739e-09	0.923525	0.142988
cg01162410	chr2	31811538	31811537	2:32152708:T:TA	31927639	31927639	0	7.38517e-13	0.218995	0.0279036
cg09626357	chr2	31811549	31811548	rs11434154:32337415:C:CT	32112346	32112346	0	5.55979e-09	0.191284	0.0309166
cg26820922	chr2	32277955	32277954	rs138302898:32502987:C:G	32277918	32277918	0	2.39685e-10	0.594852	0.0875545
cg18727641	chr2	32502680	32502679	rs17325656:33348483:T:C	33123416	33123416	0	1.73545e-06	0.468378	0.0940702
cg26404416	chr2	32743616	32743615	rs12999445:33676550:G:C	33451483	33451483	0	1.16672e-06	-0.142791	0.0281744
cg01119845	chr2	32938395	32938394	rs10189447:33132737:G:A	32907670	32907670	0	2.56995e-07	0.169612	0.0314166
cg00734968	chr2	32941197	32941196	rs72866273:33162035:C:A	32936968	32936968	0	7.81393e-07	-0.180701	0.0350397
cg26815316	chr2	33441449	33441448	rs604394	33432770	33432770	0	2.36204e-20	-0.829473	0.0771298
cg24787425	chr2	33475862	33475861	rs6714693:33695942:C:T	33470875	33470875	0	8.95204e-20	-0.247337	0.0234745
cg09394127	chr2	33485804	33485803	rs78400812:33554796:A:C	33329729	33329729	0	4.30512e-08	0.389062	0.0673816
cg16082108	chr2	33681209	33681208	rs71864138:33906260:TTA:T	33681193	33681195	0	3.76781e-10	-0.215179	0.0320755
cg02292899	chr2	35428791	35428790	rs150508401:35684261:G:GT	35459195	35459195	0	8.62982e-09	-0.156027	0.0255795
cg01154283	chr2	36376401	36376400	rs1159133:36612334:C:T	36385191	36385191	0	5.08172e-07	0.155463	0.029604
cg17787237	chr2	36478391	36478390	exm-rs848534	36463099	36463099	0	5.97739e-09	0.278214	0.0450715
cg19917070	chr2	36797455	36797454	rs5830441:37040004:CT:C	36812861	36812862	0	7.45661e-09	0.114765	0.0187255
cg11156053	chr2	171124738	171124737	rs34143031:171936542:A:T	171080032	171080032	0	4.14803e-08	-0.229059	0.0396181
cg08762203	chr2	171523764	171523763	rs960748	171523426	171523426	0	3.24912e-13	0.340697	0.0426241
cg12298688	chr2	172081964	172081963	rs1047889:172946527:T:C	172081799	172081799	0	4.26335e-08	-0.115016	0.0199127
cg05731808	chr2	172428665	172428664	rs67923340:173309316:GC:G	172444588	172444589	0	2.90069e-09	-0.408928	0.0647531
cg08280882	chr2	172870263	172870262	rs1991174:173735180:G:C	172870452	172870452	0	2.87715e-08	0.155902	0.0266197
cg27188696	chr2	173003072	173003071	rs2676521:173849254:T:G	172984526	172984526	0	8.43149e-08	0.127902	0.0226992
cg25310182	chr2	173075476	173075475	rs139995048:172965270:G:A	172100542	172100542	0	5.74367e-12	0.891078	0.1191
cg09210666	chr2	173076848	173076847	rs35590504:174009207:A:G	173144479	173144479	0	1.7519e-12	-0.225591	0.0293173
cg04491630	chr2	173101892	173101891	rs58157989:173888969:G:A	173024241	173024241	0	1.73218e-26	-2.18331	0.167308
cg09498344	chr2	173338927	173338926	rs7576285:174207046:T:A	173342318	173342318	0	2.41676e-08	0.219132	0.0371903
cg16442312	chr2	173415180	173415179	rs141764351:174209301:C:T	173344573	173344573	0	2.96927e-08	0.317173	0.0542157
cg15923331	chr2	173900573	173900572	rs11380336:174484893:G:GT	173620165	173620165	0	6.95188e-07	0.198156	0.0382335
cg03181248	chr2	174334943	174334942	rs76530578:175146842:T:C	174282114	174282114	0	1.14784e-07	0.824362	0.148002
cg03712145	chr2	174586298	174586297	rs3049897:175439681:T:TA	174574953	174574953	0	6.22974e-11	0.178144	0.0252831
cg18453965	chr2	174593840	174593839	rs11317527:175454359:GA:G	174589631	174589632	0	1.46894e-09	0.210757	0.0326873
cg15134438	chr2	174990211	174990210	rs2054137:175810657:G:A	174945929	174945929	0	2.31776e-10	-0.184156	0.0270801
cg16907154	chr2	175004688	175004687	rs55894620:175851350:G:GT	174986622	174986622	0	1.28888e-16	0.265817	0.0284792
cg18833364	chr2	175535088	175535087	rs10580437:176216868:CTT:C	175352140	175352142	0	2.96428e-08	-0.172797	0.0295352
cg13897925	chr2	176002214	176002213	rs72912925:176801378:A:C	175936650	175936650	0	4.75194e-20	0.277364	0.026068
cg09701582	chr2	176153070	176153069	rs11888604:177004026:C:T	176139298	176139298	0	1.7863e-07	0.123661	0.0225806
cg21902187	chr2	176172983	176172982	rs146950407:176724173:T:C	175859445	175859445	0	2.69892e-07	-0.342261	0.0635191
cg12858336	chr2	176177446	176177445	rs4972805:177012570:C:T	176147842	176147842	0	2.99323e-07	-0.142043	0.0264705
cg13092806	chr2	176178528	176178527	rs1562314:177045560:A:T	176180832	176180832	0	7.42232e-16	0.356782	0.0394701
cg06643318	chr2	96581154	96581153	rs146537411:97220224:GGGCA:G	96554487	96554491	0	3.40475e-21	-0.312887	0.0282642
cg16565442	chr2	96740588	96740587	2:97398528:C:CTT	96732791	96732791	0	1.33052e-17	-0.538841	0.05548
cg05501761	chr2	96839863	96839862	rs113238113:98414553:C:T	97798090	97798090	0	5.03382e-09	0.4717	0.0759979
cg13275176	chr2	96868714	96868713	rs62154858:97873288:T:G	97207551	97207551	0	1.33978e-06	1.33306	0.264643
cg02687352	chr2	96891549	96891548	rs12613171	96888010	96888010	0	7.22229e-09	-0.210725	0.0343471
cg25961199	chr2	98087473	98087472	rs138698606:98728744:GGT:G	98112281	98112283	0	2.34514e-06	0.0811541	0.0165257
cg27418371	chr2	98127688	98127687	rs60884498:98718187:G:T	98101724	98101724	0	1.1847e-07	-0.138892	0.0249658
cg21488538	chr2	98347974	98347973	rs141001732:98941372:T:TA	98324909	98324909	0	2.64088e-09	-0.346434	0.0546982
cg14258218	chr2	98605233	98605232	rs35827998:99228354:AT:A	98611891	98611892	0	4.8959e-08	0.104626	0.0182037
cg14537940	chr2	98608699	98608698	rs139702364:98465902:A:T	97849439	97849439	0	1.47736e-07	1.41027	0.255636
cg15005139	chr2	98766876	98766875	rs7561818:99384070:A:T	98767607	98767607	0	2.58134e-23	0.359879	0.0303354
cg10814190	chr2	99142342	99142341	rs34554984:99794138:A:AT	99177675	99177675	0	2.03539e-07	-0.10377	0.019045
cg12909060	chr2	99155437	99155436	rs12999417:99865548:G:A	99249085	99249085	0	2.40707e-08	-0.139617	0.023692
cg03794238	chr2	99179427	99179426	rs13430662:99905135:G:A	99288672	99288672	0	3.08548e-10	-0.452072	0.0670096
cg09592272	chr2	99184737	99184736	rs35439305:99754349:CA:C	99137886	99137887	0	2.95529e-10	0.1765	0.0261307
cg21542459	chr2	99184902	99184901	rs5832868:99798066:CT:C	99181603	99181604	0	3.53365e-29	0.841692	0.0598588
cg09905438	chr2	99451732	99451731	rs35395900:99765905:C:CT	99149442	99149442	0	1.91696e-06	0.129414	0.0261098
cg20803618	chr2	99593810	99593809	rs150304296:100348864:G:GT	99732402	99732402	0	5.48661e-08	-0.472246	0.0825035
cg23812853	chr2	99602748	99602747	rs151322416:100876231:G:A	100259769	100259769	0	4.05746e-07	-0.451559	0.085194
cg12126990	chr2	99971583	99971582	rs76990532:100595344:G:A	99978882	99978882	0	8.08282e-09	-0.551447	0.0902126
cg07376775	chr2	100033430	100033429	2:100438776:CT:C	99822314	99822315	0	9.37313e-21	-2.35946	0.216363
cg20059337	chr2	100070232	100070231	rs60910274:100653296:G:GA	100036834	100036834	0	1.48273e-07	0.133019	0.0241153
cg13463465	chr2	100198672	100198671	rs17023791:100849928:G:A	100233466	100233466	0	2.6893e-08	-0.203358	0.0346411
cg02102456	chr2	100207875	100207874	rs113686559:100815751:G:T	100199289	100199289	0	3.0531e-07	0.17191	0.0320619
cg18737356	chr2	100320892	100320891	rs10658854:100935582:T:TAA	100319120	100319120	0	2.25829e-25	-0.566118	0.044815
cg00144550	chr2	100321335	100321334	rs34088546:101011351:AT:A	100394889	100394890	0	4.99284e-11	-0.21199	0.0299128
cg21926883	chr2	100323016	100323015	rs5832910:100972085:C:CA	100355623	100355623	0	9.39628e-22	-0.456734	0.0404921
cg06964132	chr2	100323299	100323298	rs34088546:101011351:AT:A	100394889	100394890	0	4.07092e-08	-0.184952	0.0319681
cg24450136	chr2	100470346	100470345	rs34135335:101079743:TC:T	100463281	100463282	0	6.67593e-21	-0.427968	0.0390468
cg00596691	chr2	100562634	100562633	rs142205508:101166077:TA:T	100549615	100549616	0	1.12449e-12	0.119518	0.0153747
cg19377150	chr2	100606999	100606998	rs148807768:101223489:AG:A	100607027	100607028	0	6.48215e-31	1.80639	0.122719
cg01586074	chr2	100970454	100970453	rs12622229:101065563:C:T	100449101	100449101	0	4.69845e-07	-0.204722	0.0388579
cg17032858	chr2	233255486	233255485	rs35609673:234203578:TC:T	233294932	233294933	0	6.65942e-11	-0.338693	0.0481535
cg04341454	chr2	233346933	233346932	rs838736:234324232:G:A	233415586	233415586	0	4.9585e-08	0.157656	0.0274429
cg07174400	chr2	233350364	233350363	rs34891595:234253597:A:C	233344951	233344951	0	5.87711e-15	-0.304079	0.0350004
cg12925851	chr2	233380014	233380013	rs6726046	233378575	233378575	0	4.4962e-08	0.116561	0.0202185
cg02318652	chr2	233380617	233380616	rs6759355:234303337:C:T	233394691	233394691	0	2.619e-09	0.171081	0.027005
cg21754534	chr2	233385956	233385955	rs3075537:234294561:T:TTC	233385915	233385915	0	3.90696e-16	-0.371215	0.040581
cg07909518	chr2	234438039	234438038	rs1509084:235336166:C:T	234427522	234427522	0	1.91035e-09	-0.157751	0.0246614
cg02891813	chr2	234686447	234686446	rs6714422:235598608:A:G	234689964	234689964	0	3.00269e-07	-0.137684	0.0256616
cg24995678	chr2	235027751	235027750	rs1863814:235919457:T:C	235010813	235010813	0	9.09425e-08	0.0988689	0.0175961
cg03768469	chr2	235263420	235263419	rs11683022:236156751:C:T	235248107	235248107	0	4.05936e-13	0.213384	0.0268276
cg04329088	chr2	235374555	235374554	rs62186698:235495311:G:A	234586667	234586667	0	5.27439e-07	0.658878	0.125661
cg17934874	chr2	235579297	235579296	rs13009455:236501000:G:A	235592356	235592356	0	7.79144e-08	-0.165041	0.0292051
cg25678528	chr2	235849596	235849595	rs12474513:236768101:C:T	235859457	235859457	0	1.56217e-12	0.141748	0.0183726
cg09111686	chr2	236142957	236142956	rs6431432:237052065:A:C	236143421	236143421	0	1.83162e-20	-0.309539	0.0286722
cg22858394	chr2	236161136	236161135	rs34644903:237057993:G:GT	236149349	236149349	0	1.0763e-08	-0.21346	0.0352504
cg08335107	chr2	236732808	236732807	rs116553650:237641450:C:T	236732807	236732807	0	8.59327e-13	-1.26002	0.161099
cg26236972	chr2	237012668	237012667	rs2573718	237008961	237008961	0	8.91163e-07	-0.109074	0.0212703
cg05663417	chr2	237256783	237256782	rs35157467:238156703:G:A	237248060	237248060	0	2.31029e-11	0.160073	0.022144
cg13001732	chr2	237257026	237257025	rs35157467:238156703:G:A	237248060	237248060	0	7.11992e-09	0.0767592	0.0125056
cg08715262	chr2	43301346	43301345	rs11348537:43530707:TA:T	43303568	43303569	0	5.22071e-19	-0.590237	0.0576003
cg16965262	chr2	43406154	43406153	2:43742064:T:TATA	43514925	43514925	0	2.63297e-09	-0.282683	0.0446285
cg18720031	chr2	43577198	43577197	rs142593751:43779206:G:GT	43552067	43552067	0	2.29789e-10	0.303276	0.0445862
cg17904704	chr2	43577224	43577223	rs77212383:43479490:A:C	43252351	43252351	0	6.85543e-08	0.312268	0.0549986
cg02881939	chr2	43633552	43633551	rs113614158:43860408:CTG:C	43633269	43633271	0	1.70011e-29	-0.418591	0.0295169
cg25092752	chr2	43798625	43798624	rs77802161:44409254:G:A	44182115	44182115	0	3.34947e-08	0.319767	0.0548904
cg08781755	chr2	43944936	43944935	rs77212383:43479490:A:C	43252351	43252351	0	6.77242e-07	0.401257	0.0773354
cg23473493	chr2	44044341	44044340	rs201797375:44108016:TCTC:T	43880877	43880880	0	9.07353e-34	2.5576	0.161725
cg02737291	chr2	44155292	44155291	rs4146528	44157046	44157046	0	9.97422e-11	-0.492953	0.0708421
cg16927689	chr2	44244042	44244041	rs56394300:44475666:AAC:A	44248527	44248529	0	1.00534e-08	-0.378933	0.0624357
cg01281539	chr2	44918749	44918748	rs477659:45145861:G:A	44918722	44918722	0	7.1299e-09	0.148159	0.024139
cg06168026	chr2	44935058	44935057	rs501003:45155103:C:A	44927964	44927964	0	1.61438e-15	-0.658609	0.0739362
cg03312366	chr2	44952278	44952277	rs1983312	44959988	44959988	0	3.07653e-09	-0.115306	0.018292
cg15584194	chr2	44972833	44972832	rs12712930:45201792:A:C	44974653	44974653	0	7.72394e-19	-0.24515	0.0240752
cg06819718	chr2	45008103	45008102	rs2944665	45067347	45067347	0	1.84843e-09	0.186992	0.0292034
cg13052965	chr2	45010094	45010093	rs71422138:45302414:T:C	45075275	45075275	0	5.28575e-07	0.239181	0.0456207
cg01938496	chr2	45070453	45070452	rs189232385:45286711:T:A	45059572	45059572	0	1.01254e-11	0.82866	0.112297
cg16444777	chr2	46337963	46337962	rs12614710:46565091:T:G	46337952	46337952	0	1.49658e-12	-0.301251	0.0390077
cg11369576	chr2	46371719	46371718	rs4953446:47258235:G:A	47031096	47031096	0	1.98112e-07	0.106098	0.0194517
cg12662214	chr2	46616954	46616953	rs112164122:47118440:C:T	46891301	46891301	0	7.99567e-08	1.08318	0.191859
cg10499126	chr2	46910004	46910003	rs7574514:47125914:C:G	46898775	46898775	0	6.72873e-09	-0.164517	0.0267541
cg11353440	chr2	47063250	47063249	rs3739099:47301029:A:G	47073890	47073890	0	3.68931e-07	0.203371	0.0382208
cg03210866	chr2	47370050	47370049	2:47615685:G:GT	47388546	47388546	0	7.33228e-10	-0.219354	0.0333287
cg22269526	chr2	47403086	47403085	rs112088253:47623154:G:T	47396015	47396015	0	1.06289e-08	0.137556	0.0227065
cg10809134	chr2	47652596	47652595	rs13423962:47180609:T:C	46953470	46953470	0	1.68398e-08	-0.255959	0.0429068
cg10211062	chr2	47688724	47688723	rs1229575:47931452:G:T	47704313	47704313	0	3.11668e-09	0.258358	0.0410019
cg04103432	chr2	188976857	188976856	rs1878201:189841613:A:G	188976887	188976887	0	4.77319e-10	-0.30125	0.0452088
cg11470028	chr2	189098148	189098147	rs142181065:189975951:CAT:C	189111225	189111227	0	8.18205e-30	-0.870898	0.0608951
cg24571553	chr2	189130056	189130055	rs114825456:189552485:A:G	188687758	188687758	0	8.63395e-11	1.35481	0.193951
cg25304128	chr2	189412203	189412202	rs10207860:190146586:C:T	189281860	189281860	0	7.38945e-08	0.21073	0.0372174
cg02308564	chr2	189674471	189674470	2:190692640:T:TTTTGTTTG	189827914	189827914	0	4.04006e-09	0.287028	0.0459235
cg05455892	chr2	189763247	189763246	rs150363517:190816007:A:C	189951281	189951281	0	6.31552e-07	-0.356756	0.0685559
cg15241390	chr2	189783968	189783967	rs376762507:190625528:GA:G	189760802	189760803	0	3.91388e-08	-1.01154	0.174595
cg03757819	chr2	190137595	190137594	rs785223:191002589:G:T	190137863	190137863	0	3.23964e-07	0.223341	0.0417536
cg21909722	chr2	190137661	190137660	rs11901445:191018607:A:G	190153881	190153881	0	3.22144e-07	-0.100449	0.0187746
cg06012852	chr2	190435825	190435824	rs12996454:191295004:T:C	190430278	190430278	0	1.18396e-08	0.131562	0.0217949
cg20917093	chr2	190534365	190534364	rs58276775:191355288:C:CA	190490562	190490562	0	3.16569e-12	0.678531	0.0894104
cg20818283	chr2	190534375	190534374	rs11374246:191417445:C:CA	190552719	190552719	0	8.38669e-11	0.707087	0.101146
cg26468699	chr2	190653895	190653894	rs72915455:191143173:G:A	190278447	190278447	0	1.79345e-06	-0.100516	0.020218
cg07984458	chr2	190701755	190701754	rs115557657:191786670:T:C	190921944	190921944	0	1.59591e-07	0.780241	0.141852
cg23132872	chr2	191017575	191017574	rs6745710:191878654:C:G	191013928	191013928	0	4.3772e-19	0.297411	0.028942
cg17287767	chr2	191150554	191150553	rs75592037:191038930:C:T	190174204	190174204	0	9.82564e-07	-0.30494	0.059718
cg13231232	chr2	191303834	191303833	rs34759324:192129209:CT:C	191264483	191264484	0	7.23514e-08	-0.13264	0.0234077
cg13815577	chr2	191376713	191376712	rs149218447:191963305:G:A	191098579	191098579	0	3.10396e-12	-3.06512	0.403705
cg17243052	chr2	191574457	191574456	rs115149685:192265712:T:C	191400986	191400986	0	4.15587e-07	-0.577339	0.109031
cg10462618	chr2	191638533	191638532	rs5837251:192502868:GA:G	191638142	191638143	0	5.16041e-12	0.137898	0.0183838
cg11454957	chr2	192139969	192139968	rs35215307:193000757:A:G	192136031	192136031	0	4.92265e-27	0.344393	0.0259832
cg05980785	chr2	196719168	196719167	rs1406214:197286276:G:A	196421552	196421552	0	1.05206e-06	-0.35251	0.0692399
cg22666013	chr2	196927566	196927565	rs11318184:197801055:CA:C	196936331	196936332	0	1.19294e-12	0.294917	0.037989
cg00230895	chr2	196927580	196927579	rs11318184:197801055:CA:C	196936331	196936332	0	5.94798e-14	0.417039	0.0503093
cg23856150	chr2	197089952	197089951	rs77785057:198639653:G:T	197774929	197774929	0	6.08443e-07	0.520197	0.0998069
cg19200197	chr2	197615327	197615326	rs59314546:198232000:C:CA	197367276	197367276	0	5.41383e-07	-0.161593	0.0308526
cg21300403	chr2	197785389	197785388	rs115171667:198259351:C:T	197394627	197394627	0	2.62195e-11	-0.360929	0.0500905
cg10547527	chr2	197785400	197785399	rs115171667:198259351:C:T	197394627	197394627	0	7.43109e-07	-1.04664	0.202519
cg07855083	chr2	199456149	199456148	2:200055863:A:AAT	199191140	199191140	0	1.94755e-06	0.380174	0.076757
cg22412063	chr2	108786654	108786653	rs826582:109386618:T:C	108770162	108770162	0	3.83937e-18	0.237963	0.0239925
cg06636195	chr2	108917224	108917223	rs11306434:109524105:CA:C	108907649	108907650	0	1.00001e-07	-0.157153	0.0280685
cg14795555	chr2	109172323	109172322	rs11893521:109872181:C:T	109255725	109255725	0	3.72677e-07	0.144269	0.0271245
[truncated: 11,459 more rows]
