# Supplementary material for: QTL mapping of human retina DNA methylation identifies 87 gene-epigenome interactions in age-related macular degeneration
Source: Nat Commun. 2024 Mar 4;15:1972. doi: 10.1038/s41467-024-46063-8 (PMC10912779; doi:10.1038/s41467-024-46063-8)
Supplement: Supplementary file 10 — Supplementary Data 7 [file 41467_2024_46063_MOESM10_ESM.xlsx]

## Sheet: Retina_specific_mGenes_GO
Resource	Gene set	Gene set size	# significant mGenes	Fraction of genes that are mGenes	Hypergeometric p-value	Empirical gene set enrichment p-value	Benjamini Hochberg adjusted p-value (FDR)	Pass nominal significance	Pass BH significance (FDR<0.05)	Significant mGenes
GO_BP	HOMOPHILIC_CELL_ADHESION_VIA_PLASMA_MEMBRANE_ADHESION_MOLECULES	87	40	0.46	5.38e-11	0	0	TRUE	TRUE	PCDHGA9;PCDHGA4;ROBO2;BSG;ROBO1;CDH4;CDH10;DSCAM;PALLD;PLXNB2;DSCAML1;PTPRM;KIRREL3;CDH17;PCDH15;CDH1;CEACAM5;PCDHGA3;PCDHGB6;PCDHGB5;PCDHGB3;PCDHGB2;PCDHGB1;PCDHGA7;PCDHGA6;PCDHGA5;PCDHGA2;PCDHGA1;PCDHB8;PCDHA8;PCDHA7;PCDHA6;PCDHA5;PCDHA4;PCDHA3;PCDHA2;PCDHA1;PCDHGB4;PCDHGA8;CLSTN3
GO_BP	CELL_CELL_ADHESION_VIA_PLASMA_MEMBRANE_ADHESION_MOLECULES	129	44	0.34	4.47e-07	1e-05	0.0182	TRUE	TRUE	PCDHGA9;PCDHGA4;ROBO2;BSG;ROBO1;CDH4;CDH10;DAB1;DSCAM;PALLD;CRB1;PLXNB2;ITGB2;DSCAML1;PTPRM;KIRREL3;CDH17;LRFN5;PCDH15;CDH1;CEACAM5;PCDHGA3;PCDHGB6;PCDHGB5;PCDHGB3;PCDHGB2;PCDHGB1;PCDHGA7;PCDHGA6;PCDHGA5;PCDHGA2;PCDHGA1;PCDHB8;PCDHA8;PCDHA7;PCDHA6;PCDHA5;PCDHA4;PCDHA3;PCDHA2;PCDHA1;PCDHGB4;PCDHGA8;CLSTN3
GO_BP	REGULATION_OF_AXONOGENESIS	66	24	0.36	5.75e-05	8e-05	0.0656	TRUE	FALSE	ROBO2;NEFL;ROBO1;RYK;DISC1;GSK3B;MAP2;BRSK2;CDH4;ZFYVE27;DAB1;DCC;DSCAM;EIF4G2;PLXND1;MACF1;PLXNB2;PAK2;RTN4;TRAK2;TNR;LINGO1;SEMA3E;KIAA0319
GO_BP	DENDRITE_DEVELOPMENT	85	28	0.33	0.00011	8e-05	0.0656	TRUE	FALSE	NEURL1;NEDD4L;NEDD4;LPAR1;IQGAP1;RAPGEF2;CRK;CFL1;DISC1;GSK3B;MAP2;DNM3;RBFOX2;COBL;FARP1;DAB1;DCC;DSCAM;EIF4G2;BTBD3;ARC;PAK2;TRAK2;LLPH;KNDC1;KIAA0319;PAK4;CAMK1D
GO_BP	REGULATION_OF_NEURON_PROJECTION_DEVELOPMENT	179	49	0.27	9.89e-05	9e-05	0.0656	TRUE	FALSE	ROR2;RGS2;ROBO2;NEDD4L;NCK1;NEDD4;LPAR1;NEFL;NTRK3;ROR1;ROBO1;RYK;NDRG4;IQGAP1;RAPGEF2;CRK;CFL1;STMN2;DISC1;GSK3B;MAP2;BRSK2;DNM3;STK24;COBL;CDH4;ZFYVE27;DAB1;DCC;DSCAM;EIF4G2;PLXND1;KANK1;ARC;MACF1;PLXNB2;PAK2;RTN4;TRAK2;TNR;LINGO1;KNDC1;SEMA3E;KIAA0319;ARSB;NDNF;CAMK1D;AVIL;ITGA6
GO_BP	REGULATION_OF_CELLULAR_COMPONENT_SIZE	148	42	0.28	0.000128	0.00014	0.0729	TRUE	FALSE	DLG1;MKKS;SPIRE2;CAPZA3;NCK1;NEFL;P2RX7;RYK;DISC1;GSK3B;MAP2;USH1C;RPTOR;CDH4;ARPC2;BAIAP2;WASF3;ZFYVE27;DCC;DSCAM;EIF4G2;KANK1;MACF1;NRCAM;RTN4;TNR;SEMA3E;KIAA0319;LAMTOR5;LAMTOR4;FMN1;SCIN;IQGAP2;VAV2;CLCN3;ARPC4;MTPN;PRR16;AVIL;SLC12A4;ARFIP2;FCHSD2
GO_BP	PHOTORECEPTOR_CELL_MAINTENANCE	18	10	0.56	0.000156	0.00014	0.0729	TRUE	FALSE	SLC2A1;MKKS;ESRRB;CROCC;USH1C;CRB1;PROM1;CLCN3;BBS12;PCDH15
GO_MF	CELL_ADHESION_MOLECULE_BINDING	231	68	0.29	5.81e-07	3e-05	0.0127	TRUE	TRUE	ITGA2;ITGB2;ITGB4;PARK7;VCL;SND1;NRG1;FAM129B;RACK1;EIF4G2;FLNB;MACF1;KTN1;PLEC;LRRC59;RTN4;PTPN1;EIF4H;CAST;RPL14;PALLD;EPS8L1;IQGAP1;SEPT9;ADAM17;CPE;DLG1;PI4KA;CASR;PAK4;CSNK1D;PAK2;OBSCN;LTBP4;STK24;PTPRM;NCK1;ITGB1BP1;CDH17;FBLN5;DSCAM;ECM2;ITGB5;ITGB8;LAMA5;NLGN2;SNX1;JAM3;CD151;ERC1;ANK3;PROM1;CDH4;CDH10;CDH1;ITGA6;BSG;ARFIP2;NUMB;BAIAP2;ABI1;PFKP;MPP7;DSCAML1;GOLGA3;PHLDB2;TJP3;KIRREL3
GO_MF	CADHERIN_BINDING	144	45	0.31	8.88e-06	4e-05	0.0127	TRUE	TRUE	PARK7;VCL;SND1;FAM129B;RACK1;EIF4G2;FLNB;MACF1;KTN1;PLEC;LRRC59;RTN4;PTPN1;EIF4H;CAST;RPL14;EPS8L1;IQGAP1;SEPT9;DLG1;PI4KA;PAK4;CSNK1D;PAK2;STK24;PTPRM;NCK1;CDH17;SNX1;ERC1;ANK3;PROM1;CDH4;CDH10;CDH1;ITGA6;BSG;ARFIP2;NUMB;BAIAP2;ABI1;PFKP;MPP7;GOLGA3;PHLDB2
GO_MF	NADP_BINDING	21	11	0.52	0.000178	0.0001	0.0175	TRUE	TRUE	CRYM;CRYZ;LBR;FMO1;FMO5;MTRR;QDPR;SRD5A1;HIBADH;DHCR7;PGD
GO_MF	CALCIUM_ION_TRANSMEMBRANE_TRANSPORTER_ACTIVITY	49	19	0.39	0.000167	0.00011	0.0175	TRUE	TRUE	GRIN2A;PANX1;ATP2B4;RASA3;PKDREJ;PKD1L2;ATP2A3;ATP2B2;CHRNA9;STIM2;CACNG6;RYR2;FAM155A;CACNA1C;TRPM8;TRPM3;CACNA1I;CACNA2D2;ATP2C2
GO_MF	PHOSPHATIDYLINOSITOL_BINDING	110	34	0.31	0.000138	0.00017	0.0217	TRUE	TRUE	ARAP1;TULP3;SCIN;KIF16B;AVIL;IQGAP2;IQGAP1;RAB35;SEPT12;PLA2G4A;PLCZ1;PASK;OBSCN;DPEP1;SNX1;PITPNB;PITPNC1;ESYT3;CEACAM5;ZCCHC14;ARFIP2;SNX19;SNX7;PLEKHA5;PLEKHB2;GOLPH3L;PARD3;PLEKHA4;SNX16;MPPE1;SNX25;ZFYVE19;SNX29;FCHSD2
GO_MF	LYASE_ACTIVITY	92	28	0.3	0.00069	0.0005	0.0531	TRUE	FALSE	HMGA2;ENO2;ENOSF1;SRR;PARK7;HADHB;HADHA;ADCY9;PM20D1;CA2;CA7;CA8;ECHS1;ECHDC2;GSTM4;ALDOC;CA11;GAD2;SDS;SDSL;CENPV;PISD;HDC;PCK2;NAXD;PTS;UROD;GGACT
