# Supplementary material for: QTL mapping of human retina DNA methylation identifies 87 gene-epigenome interactions in age-related macular degeneration
Source: Nat Commun. 2024 Mar 4;15:1972. doi: 10.1038/s41467-024-46063-8 (PMC10912779; doi:10.1038/s41467-024-46063-8)
Supplement: Supplementary file 12 — Supplementary Data 9 [file 41467_2024_46063_MOESM12_ESM.xlsx]

## Sheet: eQTM_target_genes_GO
Resource	Gene set	Gene set size	# significant mGenes	Fraction of genes that are mGenes	Hypergeometric p-value	Empirical gene set enrichment p-value	Benjamini Hochberg adjusted p-value (FDR)	Pass nominal significance	Pass BH significance (FDR<0.05)	Significant eQTM target genes
GO_BP	VIRAL_GENE_EXPRESSION	183	40	0.22	3.21e-09	0	0	TRUE	TRUE	RPL6;RPL24;RPL26;RPS27A;SMARCA4;RPL9;RPL17;RPL21;RPL22;RPL30;RPL28;RPL31;RPL34;RPL35A;RPL37A;RPS2;RPS3A;RPS7;RPS12;RPS13;RPS15A;RPS17;RPS23;RPS25;CTDP1;POLR2G;GTF2F1;POLR2C;POLR2E;PTBP1;NUP160;EIF2D;CDK9;TARDBP;UBP1;NUP205;NELFB;NELFA;TRIM8;USF2
GO_BP	OXIDATIVE_PHOSPHORYLATION	118	27	0.23	4.4e-07	0	0	TRUE	TRUE	FXN;NDUFS4;COX7A2;FAM173A;NDUFAB1;ATP5H;COX6C;COX7C;UQCRQ;UQCRHL;NDUFA4;NDUFA8;NDUFA10;NDUFB1;NDUFB2;NDUFB3;NDUFB6;NDUFB7;NDUFC1;NDUFS8;ATP5E;ATP5J;ATP5O;NDUFA12;UQCRFS1;UQCRH;ATP5J2
GO_BP	ESTABLISHMENT_OF_PROTEIN_LOCALIZATION_TO_ENDOPLASMIC_RETICULUM	108	25	0.23	9.29e-07	0	0	TRUE	TRUE	RPL6;RPL24;RPL26;RPS27A;RPL9;RPL17;RPL21;RPL22;RPL30;RPL28;RPL31;RPL34;RPL35A;RPL37A;RPS2;RPS3A;RPS7;RPS12;RPS13;RPS15A;RPS17;RPS23;RPS25;SGTA;SRP19
GO_BP	RESPIRATORY_ELECTRON_TRANSPORT_CHAIN	96	23	0.24	1.33e-06	0	0	TRUE	TRUE	MYBBP1A;NDUFS4;SLC25A22;SLC25A12;NDUFAB1;SDHB;COX6C;COX7C;UQCRQ;UQCRHL;NDUFA4;NDUFA8;NDUFA10;NDUFB1;NDUFB2;NDUFB3;NDUFB6;NDUFB7;NDUFC1;NDUFS8;NDUFA12;UQCRFS1;UQCRH
GO_BP	NUCLEAR_TRANSCRIBED_MRNA_CATABOLIC_PROCESS_NONSENSE_MEDIATED_DECAY	110	26	0.24	3.66e-07	0	0	TRUE	TRUE	RPL6;RPL24;RPL26;RPS27A;EIF4G1;SMG6;UPF1;RPL9;RPL17;RPL21;RPL22;RPL30;RPL28;RPL31;RPL34;RPL35A;RPL37A;RPS2;RPS3A;RPS7;RPS12;RPS13;RPS15A;RPS17;RPS23;RPS25
GO_BP	ATP_METABOLIC_PROCESS	258	43	0.17	2.79e-06	0	0	TRUE	TRUE	BAD;ATP6V0C;FOXK2;ZBTB7A;FXN;GIT1;NUP160;PFKL;NDUFS4;JMJD8;FAM20C;COX7A2;FAM173A;CBFA2T3;SLC25A12;NUDT5;NUP205;GALK1;NDUFAB1;ATP5H;COX6C;COX7C;UQCRQ;UQCRHL;NDUFA4;NDUFA8;NDUFA10;NDUFB1;NDUFB2;NDUFB3;NDUFB6;NDUFB7;NDUFC1;NDUFS8;ATP5E;ATP5J;ATP5O;NDUFA12;UQCRFS1;UQCRH;ATP5J2;NUDT2;VPS9D1
GO_BP	COTRANSLATIONAL_PROTEIN_TARGETING_TO_MEMBRANE	94	24	0.26	2.22e-07	0	0	TRUE	TRUE	RPL6;RPL24;RPL26;RPS27A;RPL9;RPL17;RPL21;RPL22;RPL30;RPL28;RPL31;RPL34;RPL35A;RPL37A;RPS2;RPS3A;RPS7;RPS12;RPS13;RPS15A;RPS17;RPS23;RPS25;SRP19
GO_BP	NADH_DEHYDROGENASE_COMPLEX_ASSEMBLY	56	15	0.27	2.22e-05	1e-05	0.0047	TRUE	TRUE	NDUFS4;NDUFAB1;NDUFA8;NDUFA10;NDUFB1;NDUFB2;NDUFB3;NDUFB6;NDUFB7;NDUFC1;NDUFS8;NDUFA12;NDUFAF7;ECSIT;COA1
GO_BP	CELLULAR_RESPIRATION	156	28	0.18	3.87e-05	1e-05	0.0047	TRUE	TRUE	GLTSCR2;FXN;MYBBP1A;NDUFS4;CBFA2T3;SLC25A22;SLC25A12;MDH1;NDUFAB1;SDHB;COX6C;COX7C;UQCRQ;UQCRHL;NDUFA4;NDUFA8;NDUFA10;NDUFB1;NDUFB2;NDUFB3;NDUFB6;NDUFB7;NDUFC1;NDUFS8;NDUFA12;UQCRFS1;UQCRH;SUCLG1
GO_BP	NUCLEAR_TRANSCRIBED_MRNA_CATABOLIC_PROCESS	191	35	0.18	2.67e-06	1e-05	0.0047	TRUE	TRUE	ZCCHC11;ATM;RPL6;RPL24;PCID2;RPL26;TNKS1BP1;DDX5;RPS27A;EIF4G1;SMG6;UPF1;RPL9;RPL17;RPL21;RPL22;RPL30;RPL28;RPL31;RPL34;RPL35A;RPL37A;RPS2;RPS3A;RPS7;RPS12;RPS13;RPS15A;RPS17;RPS23;RPS25;DCPS;POLR2G;WDR61;TTC37
GO_BP	PROTEIN_LOCALIZATION_TO_ENDOPLASMIC_RETICULUM	135	27	0.2	6.91e-06	3e-05	0.0117	TRUE	TRUE	RPL6;RPL24;RPL26;RPS27A;RPL9;RPL17;RPL21;RPL22;RPL30;RPL28;RPL31;RPL34;RPL35A;RPL37A;RPS2;RPS3A;RPS7;RPS12;RPS13;RPS15A;RPS17;RPS23;RPS25;GABARAPL2;SGTA;GPAA1;SRP19
GO_BP	MITOCHONDRIAL_ELECTRON_TRANSPORT_NADH_TO_UBIQUINONE	44	13	0.3	2.49e-05	3e-05	0.0117	TRUE	TRUE	NDUFS4;NDUFAB1;NDUFA4;NDUFA8;NDUFA10;NDUFB1;NDUFB2;NDUFB3;NDUFB6;NDUFB7;NDUFC1;NDUFS8;NDUFA12
GO_BP	ATP_SYNTHESIS_COUPLED_ELECTRON_TRANSPORT	80	19	0.24	1.25e-05	4e-05	0.0144	TRUE	TRUE	NDUFS4;NDUFAB1;COX6C;COX7C;UQCRQ;UQCRHL;NDUFA4;NDUFA8;NDUFA10;NDUFB1;NDUFB2;NDUFB3;NDUFB6;NDUFB7;NDUFC1;NDUFS8;NDUFA12;UQCRFS1;UQCRH
GO_BP	PROTEIN_TARGETING_TO_MEMBRANE	179	31	0.17	3.14e-05	5e-05	0.0168	TRUE	TRUE	RPL6;RPL24;RPL26;RPS27A;RPL9;RPL17;RPL21;RPL22;RPL30;RPL28;RPL31;RPL34;RPL35A;RPL37A;RPS2;RPS3A;RPS7;RPS12;RPS13;RPS15A;RPS17;RPS23;RPS25;SGTA;NACAD;ZDHHC24;NACA;SRP19;MICALL1;PEX16;C2CD5
GO_BP	TRANSLATIONAL_INITIATION	173	30	0.17	4.08e-05	8e-05	0.025	TRUE	TRUE	METTL3;EIF2B5;RPL6;RPL24;RPL26;RPS27A;NCK2;COPS5;EIF4G1;RPL9;RPL17;RPL21;RPL22;RPL30;RPL28;RPL31;RPL34;RPL35A;RPL37A;RPS2;RPS3A;RPS7;RPS12;RPS13;RPS15A;RPS17;RPS23;RPS25;POLR2G;EIF2D
GO_BP	TRANSCRIPTION_ELONGATION_FROM_RNA_POLYMERASE_II_PROMOTER	80	17	0.21	0.000157	0.00012	0.0352	TRUE	TRUE	PCID2;BRD4;EZH2;CTDP1;POLR2G;WDR61;GTF2F1;POLR2C;POLR2E;ELL;CDK9;ELP4;MLLT1;ADRM1;NELFB;ELOC;NELFA
GO_BP	ELECTRON_TRANSPORT_CHAIN	147	25	0.17	0.000239	0.00018	0.0497	TRUE	TRUE	GLRX2;MYBBP1A;NDUFS4;COX7A2;SLC25A22;SLC25A12;NDUFAB1;SDHB;COX6C;COX7C;UQCRQ;UQCRHL;NDUFA4;NDUFA8;NDUFA10;NDUFB1;NDUFB2;NDUFB3;NDUFB6;NDUFB7;NDUFC1;NDUFS8;NDUFA12;UQCRFS1;UQCRH
GO_CC	CYTOSOLIC_RIBOSOME	93	24	0.26	1.96e-07	0	0	TRUE	TRUE	RPL26;RPS3A;RPS7;RPS13;RPS25;RPS27A;RPL6;RPL21;RPL24;RPL34;RPS23;RPS12;EIF2D;RPL9;RPL17;RPL22;RPL30;RPL28;RPL31;RPL35A;RPL37A;RPS2;RPS15A;RPS17
GO_CC	OXIDOREDUCTASE_COMPLEX	88	23	0.26	2.74e-07	0	0	TRUE	TRUE	NDUFAB1;MRPS36;CYB5R3;UQCRQ;UQCRHL;NDUFA4;NDUFA8;NDUFA10;NDUFB1;NDUFB2;NDUFB3;NDUFB6;NDUFB7;NDUFC1;NDUFS4;NDUFS8;NDUFA12;BCKDHA;SDHB;UQCRFS1;UQCRH;NOXA1;GMPR2
GO_CC	INNER_MITOCHONDRIAL_MEMBRANE_PROTEIN_COMPLEX	121	27	0.22	8.26e-07	0	0	TRUE	TRUE	ATP5E;ATP5H;ATP5J;ATP5O;NDUFAB1;ATP5J2;COX7C;IMMP1L;UQCRQ;UQCRHL;NDUFA4;NDUFA8;NDUFA10;NDUFB1;NDUFB2;NDUFB3;NDUFB6;NDUFB7;NDUFC1;NDUFS4;NDUFS8;NDUFA12;SDHB;UQCRFS1;UQCRH;USMG5;C14orf2
GO_CC	RIBOSOMAL_SUBUNIT	171	32	0.19	4.97e-06	0	0	TRUE	TRUE	MRPL28;NDUFAB1;MRPL4;MRPS2;MRPL41;MRPS34;MRPS36;MRPL33;RPL26;RPS3A;RPS7;RPS13;RPS25;RPS27A;RPL6;RPL21;RPL24;RPL34;RPS23;RPS12;EIF2D;RPL9;RPL17;RPL22;RPL30;RPL28;RPL31;RPL35A;RPL37A;RPS2;RPS15A;RPS17
GO_CC	RESPIRATORY_CHAIN_COMPLEX	67	19	0.28	7.65e-07	0	0	TRUE	TRUE	NDUFAB1;COX7C;UQCRQ;UQCRHL;NDUFA4;NDUFA8;NDUFA10;NDUFB1;NDUFB2;NDUFB3;NDUFB6;NDUFB7;NDUFC1;NDUFS4;NDUFS8;NDUFA12;SDHB;UQCRFS1;UQCRH
GO_CC	RIBOSOME	204	38	0.19	7.37e-07	0	0	TRUE	TRUE	MRPL28;CHCHD1;NDUFAB1;MRPL4;MRPS2;MRPL41;MRPS34;MRPS36;MRPL33;RPL26;RPS3A;RPS7;RPS13;RPS25;RPS27A;PTCD3;MRPS25;RPL6;RPL21;RPL24;RPL34;RPS23;RRBP1;RPS12;EEF2;EIF2D;HSPA14;RPL9;RPL17;RPL22;RPL30;RPL28;RPL31;RPL35A;RPL37A;RPS2;RPS15A;RPS17
GO_CC	MITOCHONDRIAL_PROTEIN_CONTAINING_COMPLEX	239	41	0.17	2.51e-06	1e-05	0.000768	TRUE	TRUE	ATP5E;ATP5H;ATP5J;ATP5O;MRPL28;NDUFAB1;MRPL4;MRPS2;MRPL41;MRPS34;MRPS36;MRPL33;ATP5J2;COX7C;IMMP1L;TIMM8B;UQCRQ;TOMM5;UQCRHL;NDUFA4;NDUFA8;NDUFA10;NDUFB1;NDUFB2;NDUFB3;NDUFB6;NDUFB7;NDUFC1;NDUFS4;NDUFS8;POLRMT;TOMM7;NDUFA12;MCCC1;BCKDHA;SDHB;SPG7;UQCRFS1;UQCRH;USMG5;C14orf2
GO_CC	NADH_DEHYDROGENASE_COMPLEX	41	13	0.32	1.12e-05	1e-05	0.000768	TRUE	TRUE	NDUFAB1;NDUFA4;NDUFA8;NDUFA10;NDUFB1;NDUFB2;NDUFB3;NDUFB6;NDUFB7;NDUFC1;NDUFS4;NDUFS8;NDUFA12
GO_CC	RESPIRASOME	81	20	0.25	4.26e-06	2e-05	0.00136	TRUE	TRUE	NDUFAB1;COX7A2;COX7C;UQCRQ;UQCRHL;NDUFA4;NDUFA8;NDUFA10;NDUFB1;NDUFB2;NDUFB3;NDUFB6;NDUFB7;NDUFC1;NDUFS4;NDUFS8;NDUFA12;SDHB;UQCRFS1;UQCRH
GO_CC	CYTOSOLIC_LARGE_RIBOSOMAL_SUBUNIT	50	13	0.26	0.000115	0.0001	0.00614	TRUE	TRUE	RPL26;RPL6;RPL21;RPL24;RPL34;RPL9;RPL17;RPL22;RPL30;RPL28;RPL31;RPL35A;RPL37A
GO_CC	CYTOSOLIC_SMALL_RIBOSOMAL_SUBUNIT	39	11	0.28	0.000175	0.00013	0.00726	TRUE	TRUE	RPS3A;RPS7;RPS13;RPS25;RPS27A;RPS23;RPS12;EIF2D;RPS2;RPS15A;RPS17
GO_CC	PROTON_TRANSPORTING_ATP_SYNTHASE_COMPLEX	19	7	0.37	0.000451	0.00041	0.021	TRUE	TRUE	ATP5E;ATP5H;ATP5J;ATP5O;ATP5J2;USMG5;C14orf2
GO_CC	SMALL_RIBOSOMAL_SUBUNIT	66	14	0.21	0.00063	0.00075	0.0354	TRUE	TRUE	MRPS2;MRPS34;MRPS36;RPS3A;RPS7;RPS13;RPS25;RPS27A;RPS23;RPS12;EIF2D;RPS2;RPS15A;RPS17
GO_MF	STRUCTURAL_CONSTITUENT_OF_RIBOSOME	147	31	0.21	4.8e-07	0	0	TRUE	TRUE	RPL35A;MRPL28;MRPL4;RPL6;RPL9;RPL17;RPL21;RPL22;RPL24;RPL26;RPL30;RPL28;RPL31;RPL34;RPL37A;RPS2;RPS3A;RPS7;RPS12;RPS13;RPS15A;RPS17;RPS23;RPS25;RPS27A;MRPL41;MRPS2;MRPS25;MRPS34;MRPS36;MRPL33
GO_MF	OXIDOREDUCTASE_ACTIVITY_ACTING_ON_NAD_P_H	78	20	0.26	2.23e-06	0	0	TRUE	TRUE	TXN;NDUFA4;NDUFA8;NDUFA10;NDUFAB1;NDUFB1;NDUFB2;NDUFB3;NDUFB6;NDUFB7;NDUFC1;NDUFS4;NDUFS8;NDUFA12;CYB5R3;MTRR;POR;PRDX3;GMPR2;CRYZL1
GO_MF	NAD_P_H_DEHYDROGENASE_QUINONE_ACTIVITY	39	13	0.33	5.95e-06	2e-05	0.00455	TRUE	TRUE	NDUFA4;NDUFA8;NDUFA10;NDUFAB1;NDUFB1;NDUFB2;NDUFB3;NDUFB6;NDUFB7;NDUFC1;NDUFS4;NDUFS8;NDUFA12
GO_MF	OXIDOREDUCTASE_ACTIVITY_ACTING_ON_NAD_P_H_QUINONE_OR_SIMILAR_COMPOUND_AS_ACCEPTOR	49	14	0.29	1.96e-05	2e-05	0.00455	TRUE	TRUE	NDUFA4;NDUFA8;NDUFA10;NDUFAB1;NDUFB1;NDUFB2;NDUFB3;NDUFB6;NDUFB7;NDUFC1;NDUFS4;NDUFS8;NDUFA12;CRYZL1
GO_MF	ELECTRON_TRANSFER_ACTIVITY	111	22	0.2	5.92e-05	0.0001	0.0182	TRUE	TRUE	SDHB;GLRX2;NDUFA4;NDUFA8;NDUFA10;NDUFAB1;NDUFB1;NDUFB2;NDUFB3;NDUFB6;NDUFB7;NDUFC1;NDUFS4;NDUFS8;NDUFA12;COX6C;COX7A2;COX7C;UQCRQ;UQCRHL;UQCRFS1;UQCRH
KEGG	RIBOSOME	79	23	0.29	6.42e-09	0	0	TRUE	TRUE	RPS23;RPL17;RPL6;RPL9;RPS27A;RPS25;RPS3A;RPS2;RPL24;RPL37A;RPS12;RPL35A;RPL26;RPS17;RPL34;RPL31;RPL30;RPS15A;RPL28;RPS13;RPL21;RPS7;RPL22
KEGG	PARKINSONS_DISEASE	100	27	0.27	1.85e-09	0	0	TRUE	TRUE	NDUFB2;NDUFB1;NDUFAB1;NDUFB3;NDUFB6;NDUFB7;NDUFA10;ATP5O;NDUFA4;NDUFA8;NDUFC1;ATP5H;SDHB;NDUFS8;UQCRFS1;NDUFS4;UQCRHL;COX6C;ATP5J;UQCRQ;ATP5E;UQCRH;COX7A2;COX7C;VDAC3;UBE2L3;UBE2J2
KEGG	ALZHEIMERS_DISEASE	141	26	0.18	1.2e-05	0	0	TRUE	TRUE	BAD;NDUFB2;NDUFB1;NDUFAB1;NDUFB3;NDUFB6;NDUFB7;NDUFA10;ATP5O;NDUFA4;NDUFA8;NDUFC1;ATP5H;SDHB;NDUFS8;UQCRFS1;NDUFS4;UQCRHL;COX6C;ATP5J;UQCRQ;ATP5E;UQCRH;COX7A2;CAPN1;COX7C
KEGG	HUNTINGTONS_DISEASE	156	31	0.2	2.94e-07	0	0	TRUE	TRUE	NDUFB2;NDUFB1;NDUFAB1;NDUFB3;NDUFB6;NDUFB7;NDUFA10;ATP5O;NDUFA4;NDUFA8;NDUFC1;ATP5H;SDHB;NDUFS8;UQCRFS1;NDUFS4;UQCRHL;COX6C;ATP5J;UQCRQ;ATP5E;UQCRH;COX7A2;COX7C;VDAC3;CLTB;AP2A1;POLR2G;POLR2E;POLR2C;POLR2J2
KEGG	OXIDATIVE_PHOSPHORYLATION	102	27	0.26	2.99e-09	0	0	TRUE	TRUE	NDUFB2;NDUFB1;NDUFAB1;NDUFB3;NDUFB6;NDUFB7;NDUFA10;ATP5O;NDUFA4;NDUFA8;NDUFC1;ATP5H;SDHB;NDUFS8;UQCRFS1;NDUFS4;UQCRHL;COX6C;ATP5J;UQCRQ;ATP5E;UQCRH;COX7A2;COX7C;ATP6V0C;ATP6V0E2;ATP5J2
REACTOME	RESPIRATORY_ELECTRON_TRANSPORT	86	21	0.24	1.68e-06	0	0	TRUE	TRUE	NDUFAF7;NDUFAB1;NDUFB2;NDUFB7;NDUFC1;NDUFS8;SDHB;NDUFB3;NDUFA8;COX7C;ECSIT;NDUFA10;NDUFS4;UQCRQ;COX6C;NDUFB6;UQCRFS1;UQCRH;NDUFB1;NDUFA12;NDUFA4
REACTOME	NONSENSE_MEDIATED_DECAY_NMD_	105	26	0.25	7.24e-08	0	0	TRUE	TRUE	RPS27A;EIF4G1;RPL31;RPL6;RPL28;RPL34;RPS13;RPS12;RPL24;RPL22;RPS25;RPL21;RPS15A;RPS2;RPS3A;RPL30;RPL26;RPL9;RPS7;RPS17;RPL35A;RPS23;RPL37A;RPL17;UPF1;SMG6
REACTOME	EUKARYOTIC_TRANSLATION_INITIATION	109	25	0.23	6.26e-07	0	0	TRUE	TRUE	RPS27A;EIF4G1;RPL31;RPL6;RPL28;RPL34;RPS13;RPS12;RPL24;RPL22;RPS25;RPL21;RPS15A;RPS2;RPS3A;RPL30;RPL26;RPL9;RPS7;RPS17;RPL35A;RPS23;RPL37A;RPL17;EIF2B5
REACTOME	INFLUENZA_INFECTION	145	29	0.2	1.7e-06	0	0	TRUE	TRUE	RPS27A;POLR2E;POLR2C;GTF2F1;POLR2G;NUP160;NUP205;RPL31;RPL6;RPL28;RPL34;RPS13;RPS12;RPL24;RPL22;RPS25;RPL21;RPS15A;RPS2;RPS3A;RPL30;RPL26;RPL9;RPS7;RPS17;RPL35A;RPS23;RPL37A;RPL17
REACTOME	RESPONSE_OF_EIF2AK4_GCN2_TO_AMINO_ACID_DEFICIENCY	92	23	0.25	3.43e-07	0	0	TRUE	TRUE	RPS27A;RPL31;RPL6;RPL28;RPL34;RPS13;RPS12;RPL24;RPL22;RPS25;RPL21;RPS15A;RPS2;RPS3A;RPL30;RPL26;RPL9;RPS7;RPS17;RPL35A;RPS23;RPL37A;RPL17
REACTOME	EUKARYOTIC_TRANSLATION_ELONGATION	85	25	0.29	2.91e-09	0	0	TRUE	TRUE	RPS27A;RPL31;RPL6;RPL28;RPL34;RPS13;RPS12;RPL24;RPL22;RPS25;RPL21;RPS15A;RPS2;RPS3A;RPL30;RPL26;RPL9;RPS7;RPS17;RPL35A;RPS23;RPL37A;RPL17;EEF1A2;EEF2
REACTOME	REGULATION_OF_EXPRESSION_OF_SLITS_AND_ROBOS	154	33	0.21	5.84e-08	0	0	TRUE	TRUE	RPS27A;ELOC;PSMC6;PSMA3;SEM1;PSMA1;PSMB7;PSMD6;EIF4G1;RPL31;RPL6;LHX3;RPL28;RPL34;RPS13;RPS12;RPL24;RPL22;RPS25;RPL21;RPS15A;MSI1;RPS2;RPS3A;RPL30;RPL26;RPL9;RPS7;RPS17;RPL35A;RPS23;RPL37A;RPL17
REACTOME	SELENOAMINO_ACID_METABOLISM	107	24	0.22	1.61e-06	0	0	TRUE	TRUE	RPS27A;RPL31;RPL6;RPL28;RPL34;RPS13;RPS12;RPL24;RPL22;RPS25;RPL21;RPS15A;RPS2;RPS3A;RPL30;RPL26;RPL9;RPS7;RPS17;RPL35A;RPS23;RPL37A;RPL17;EEFSEC
REACTOME	THE_CITRIC_ACID_TCA_CYCLE_AND_RESPIRATORY_ELECTRON_TRANSPORT	150	29	0.19	3.48e-06	0	0	TRUE	TRUE	BSG;NDUFAF7;NDUFAB1;NDUFB2;NDUFB7;NDUFC1;NDUFS8;SDHB;NDUFB3;NDUFA8;ATP5E;COX7C;ECSIT;NDUFA10;SLC25A27;ATP5J;SUCLG1;NDUFS4;UQCRQ;COX6C;NDUFB6;ATP5H;UQCRFS1;UQCRH;NDUFB1;NDUFA12;NDUFA4;ATP5J2;ATP5O
REACTOME	RESPIRATORY_ELECTRON_TRANSPORT_ATP_SYNTHESIS_BY_CHEMIOSMOTIC_COUPLING_AND_HEAT_PRODUCTION_BY_UNCOUPLING_PROTEINS_	105	27	0.26	1.7e-08	0	0	TRUE	TRUE	NDUFAF7;NDUFAB1;NDUFB2;NDUFB7;NDUFC1;NDUFS8;SDHB;NDUFB3;NDUFA8;ATP5E;COX7C;ECSIT;NDUFA10;SLC25A27;ATP5J;NDUFS4;UQCRQ;COX6C;NDUFB6;ATP5H;UQCRFS1;UQCRH;NDUFB1;NDUFA12;NDUFA4;ATP5J2;ATP5O
REACTOME	COMPLEX_I_BIOGENESIS	47	14	0.3	7.81e-06	0	0	TRUE	TRUE	NDUFAF7;NDUFAB1;NDUFB2;NDUFB7;NDUFC1;NDUFS8;NDUFB3;NDUFA8;ECSIT;NDUFA10;NDUFS4;NDUFB6;NDUFB1;NDUFA12
REACTOME	SIGNALING_BY_ROBO_RECEPTORS	198	38	0.19	1.29e-07	1e-05	0.000849	TRUE	TRUE	GPC1;PRKACA;RPS27A;ELOC;PSMC6;PSMA3;SEM1;PSMA1;PSMB7;PSMD6;EIF4G1;NCK2;RPL31;RPL6;LHX3;RPL28;RPL34;RPS13;RPS12;RPL24;RPL22;RPS25;RPL21;PAK4;RPS15A;MSI1;RPS2;RPS3A;ARHGAP39;RPL30;RPL26;RPL9;RPS7;RPS17;RPL35A;RPS23;RPL37A;RPL17
REACTOME	SRP_DEPENDENT_COTRANSLATIONAL_PROTEIN_TARGETING_TO_MEMBRANE	103	24	0.23	7.72e-07	1e-05	0.000849	TRUE	TRUE	RPS27A;RPL31;RPL6;RPL28;RPL34;RPS13;RPS12;RPL24;RPL22;RPS25;RPL21;RPS15A;RPS2;RPS3A;RPL30;RPL26;RPL9;RPS7;RPS17;RPL35A;RPS23;RPL37A;RPL17;SRP19
REACTOME	RRNA_PROCESSING	187	33	0.18	6.03e-06	2e-05	0.00158	TRUE	TRUE	RPS27A;RPL31;RPL6;RPL28;RPL34;RPS13;RPS12;RPL24;RPL22;RPS25;RPL21;RPS15A;RPS2;RPS3A;RPL30;RPL26;RPL9;RPS7;RPS17;RPL35A;RPS23;RPL37A;RPL17;TSR3;DDX49;DHX37;TBL3;NOC4L;UTP14C;WDR18;PELP1;RRP1;BOP1
REACTOME	HIV_ELONGATION_ARREST_AND_RECOVERY	31	10	0.32	7.42e-05	0.0001	0.00736	TRUE	TRUE	CTDP1;POLR2E;POLR2C;ELL;GTF2F1;CDK9;ELOC;POLR2G;NELFA;NELFB
