# Supplementary material for: QTL mapping of human retina DNA methylation identifies 87 gene-epigenome interactions in age-related macular degeneration
Source: Nat Commun. 2024 Mar 4;15:1972. doi: 10.1038/s41467-024-46063-8 (PMC10912779; doi:10.1038/s41467-024-46063-8)
Supplement: Supplementary file 13 — Supplementary Data 10 [file 41467_2024_46063_MOESM13_ESM.xlsx]

## Sheet: Sheet1
Resource	Gene set	Gene set size	# significant mGenes	Fraction of genes that are mGenes	Hypergeometric p-value	Empirical gene set enrichment p-value	Benjamini Hochberg adjusted p-value (FDR)	Pass nominal significance	Pass BH significance (FDR<0.05)	Significant eQTM target genes
GO_BP	PROTEASOMAL_PROTEIN_CATABOLIC_PROCESS	205	24	0.12	2.36e-05	3e-05	0.0507	TRUE	TRUE	FZR1;PKD1;PRKACA;SIRT6;ANAPC11;KAT5;APOE;RBX1;STUB1;FBXL16;UBE2S;ANAPC2;FBXL19;RNF126;CSNK1D;BRSK2;NPLOC4;GIPC1;MAN1B1;RAD23A;ZER1;TMUB2;UBXN6;SPSB3
GO_BP	PROCESS_UTILIZING_AUTOPHAGIC_MECHANISM	212	24	0.11	4.11e-05	3e-05	0.0507	TRUE	TRUE	PRKACA;BAD;STK11;ATP6V0C;BECN1;KAT5;HDAC10;NBR1;PIK3R2;STUB1;RNF166;MAP1S;DAPK3;ATG2A;TSC2;RASIP1;CAPN1;MLST8;NPRL3;TEX264;EEF1A2;UBXN6;VPS51;WDR24
GO_BP	POSITIVE_REGULATION_OF_CATABOLIC_PROCESS	165	20	0.12	6.99e-05	7e-05	0.0789	TRUE	TRUE	FZR1;BAD;STK11;SIRT6;BECN1;KAT5;APOE;RBX1;UPF1;STUB1;APC2;CSNK1D;ENDOG;TSC2;ABCA2;PNPLA2;RAD23A;MEX3D;ZER1;EGLN2
GO_BP	REGULATION_OF_PROTEIN_CATABOLIC_PROCESS	133	16	0.12	0.000404	0.00039	0.222	TRUE	FALSE	FZR1;PKD1;PRKACA;SIRT6;APOE;RBX1;STUB1;APC2;CSNK1D;GIPC1;ABCA2;RAD23A;EEF1A2;ZER1;RAB26;EGLN2
GO_BP	POSITIVE_REGULATION_OF_DNA_METABOLIC_PROCESS	83	12	0.14	0.000403	0.00041	0.222	TRUE	FALSE	SPIRE2;PARP3;KMT5B;SIRT6;RTEL1;TGFB1;BRCA1;HDAC10;ENDOG;PNKP;GNL3;CHTF18
GO_BP	RECEPTOR_CATABOLIC_PROCESS	15	5	0.33	0.000426	0.00042	0.222	TRUE	FALSE	TGFB1;BECN1;APOE;ABCA2;CAPN1
GO_BP	REGULATION_OF_PROTEASOMAL_PROTEIN_CATABOLIC_PROCESS	73	11	0.15	0.000487	0.00046	0.222	TRUE	FALSE	FZR1;PKD1;PRKACA;SIRT6;APOE;RBX1;STUB1;CSNK1D;GIPC1;RAD23A;ZER1
GO_MF	4_IRON_4_SULFUR_CLUSTER_BINDING	15	6	0.4	4.08e-05	2e-05	0.0113	TRUE	TRUE	RTEL1;NTHL1;NDUFV1;NDUFS8;ACO2;NUBP2
GO_MF	DEACETYLASE_ACTIVITY	18	6	0.33	0.000134	9e-05	0.0254	TRUE	TRUE	HDAC5;MIER2;SIRT6;HDAC10;MACROD1;AMDHD2
GO_MF	METAL_CLUSTER_BINDING	25	6	0.24	0.000959	0.00069	0.13	TRUE	FALSE	RTEL1;NTHL1;NDUFV1;NDUFS8;ACO2;NUBP2
GO_MF	PROTEIN_DEACETYLASE_ACTIVITY	11	4	0.36	0.00132	0.00142	0.18	TRUE	FALSE	HDAC5;MIER2;SIRT6;HDAC10
GO_MF	CADHERIN_BINDING	108	13	0.12	0.00189	0.0016	0.18	TRUE	FALSE	CC2D1A;SH3GL1;SLC9A3R2;EEF2;JUP;RPS2;GIPC1;CORO1B;SPTAN1;CSNK1D;SCYL1;KLC2;SH3GLB2
GO_MF	HYDROLASE_ACTIVITY_ACTING_ON_CARBON_NITROGEN_BUT_NOT_PEPTIDE_BONDS_IN_LINEAR_AMIDES	29	6	0.21	0.00219	0.00232	0.218	TRUE	FALSE	HDAC5;MIER2;SIRT6;ACY1;HDAC10;AMDHD2
MGI	MP:0001548_hyperlipidemia	11	5	0.45	0.000111	7e-05	0.124	TRUE	FALSE	APOE;PTRF;RP11-161M6.2;LMF1;CPT1C
