# Supplementary material for: QTL mapping of human retina DNA methylation identifies 87 gene-epigenome interactions in age-related macular degeneration
Source: Nat Commun. 2024 Mar 4;15:1972. doi: 10.1038/s41467-024-46063-8 (PMC10912779; doi:10.1038/s41467-024-46063-8)
Supplement: Supplementary file 14 — Supplementary Data 11 [file 41467_2024_46063_MOESM14_ESM.xlsx]

## Sheet: Sheet1
Resource	Gene set	Gene set size	# significant mGenes	Fraction of genes that are Genes	Hypergeometric p-value	Empirical gene set enrichment p-value	Benjamini Hochberg adjusted p-value (FDR)	Significant eQTM target genes
GO_BP	REGULATION_OF_TELOMERE_MAINTENANCE	36	11	0.31	1.49e-05	1e-05	0.034	ERCC4;PARN;MAPK3;SLX4;TERF2;SMG1;PAPD5;SLX1A;SLX1B;USP7;ACD
GO_BP	NEGATIVE_REGULATION_OF_TELOMERE_MAINTENANCE_VIA_TELOMERE_LENGTHENING	17	7	0.41	6.51e-05	6e-05	0.068	ERCC4;SLX4;TERF2;PAPD5;SLX1A;SLX1B;ACD
GO_BP	REGULATION_OF_TELOMERE_MAINTENANCE_VIA_TELOMERE_LENGTHENING	28	9	0.32	5.8e-05	8e-05	0.068	ERCC4;PARN;MAPK3;SLX4;TERF2;PAPD5;SLX1A;SLX1B;ACD
GO_BP	NEGATIVE_REGULATION_OF_ORGANELLE_ORGANIZATION	135	22	0.16	8.73e-05	8e-05	0.068	ERCC4;NUPR1;SLX4;CCNF;TERF2;KATNB1;LCMT1;CDT1;CDK10;CDH5;NUBP1;C16orf45;CCP110;PAPD5;TSC2;SLX1A;SLX1B;CORO1A;PRRT2;CARMIL2;ACD;MPV17L
GO_MF	NUCLEASE_ACTIVITY	86	15	0.17	0.000455	0.00039	0.0991	ERCC4;MEIOB;CNOT1;PARN;AC004381.6;DNASE1;NTHL1;ERI2;DNASE1L2;EME2;NOB1;SLX1A;SLX1B;USB1;SLX4
GO_MF	SULFOTRANSFERASE_ACTIVITY	22	7	0.32	0.000381	0.00043	0.0991	CHST5;SULT1A4;SULT1A2;SULT1A1;SULT1A3;HS3ST4;HS3ST2
GO_MF	TRANSFERASE_ACTIVITY_TRANSFERRING_SULFUR_CONTAINING_GROUPS	30	8	0.27	0.000558	0.00061	0.0991	CTU2;CHST5;SULT1A4;SULT1A2;SULT1A1;SULT1A3;HS3ST4;HS3ST2
GO_MF	CATALYTIC_ACTIVITY_ACTING_ON_DNA	79	14	0.18	0.000593	0.0009	0.0991	ERCC4;CHTF8;CHTF18;CHD9;MEIOB;MPG;TERF2;PAPD5;DNASE1;NTHL1;DNASE1L2;SLX1A;SLX1B;SLX4
GO_MF	METAL_CLUSTER_BINDING	26	7	0.27	0.00117	0.00103	0.0991	NTHL1;CIAPIN1;ABAT;NUBP2;NUBP1;NARFL;BOLA2
GO_MF	DEOXYRIBONUCLEASE_ACTIVITY	26	7	0.27	0.00117	0.00104	0.0991	ERCC4;MEIOB;DNASE1;DNASE1L2;SLX1A;SLX1B;SLX4
GO_MF	ENDODEOXYRIBONUCLEASE_ACTIVITY	20	6	0.3	0.00143	0.00134	0.103	ERCC4;DNASE1;DNASE1L2;SLX1A;SLX1B;SLX4
GO_MF	4_IRON_4_SULFUR_CLUSTER_BINDING	14	5	0.36	0.00152	0.00144	0.103	NTHL1;CIAPIN1;NUBP2;NUBP1;NARFL
