# Supplementary material for: QTL mapping of human retina DNA methylation identifies 87 gene-epigenome interactions in age-related macular degeneration
Source: Nat Commun. 2024 Mar 4;15:1972. doi: 10.1038/s41467-024-46063-8 (PMC10912779; doi:10.1038/s41467-024-46063-8)
Supplement: Supplementary file 15 — Supplementary Data 12 [file 41467_2024_46063_MOESM15_ESM.xlsx]

## Sheet: Sheet1
Resource	Gene set	Gene set size	# significant Genes	Fraction significant genes	Hypergeometric p-value	Empirical gene set enrichment p-value	Benjamini Hochberg adjusted p-value (FDR)	Significant eQTM target genes
GO_BP	NEGATIVE_REGULATION_OF_TRANSCRIPTION_BY_RNA_POLYMERASE_II	392	81	0.21	9.9e-11	1e-05	0.0171	ZGLP1;TRIM28;CEBPA;ZNF296;SIRT2;ZNF568;NPAS1;TLE6;CALR;CCNE1;SIRT6;GLTSCR2;HAMP;ZNF587B;ZNF559-ZNF177;KLF2;ZNF266;ZNF274;NACC1;ZNF491;ZNF440;ZNF560;ZNF582;ZNF599;ZNF558;ZNF555;ZNF550;ZNF846;EID2;AES;ZNF431;ZNF675;DNMT1;NR2F6;ERF;SIN3B;ZIM2;ZNF345;KANK2;IRF2BP1;HKR1;MYPOP;ZNF404;IRF3;ZNF749;NFIC;NFIX;ZBTB7A;PIAS4;PEG3;MBD3;MIER2;PAF1;GATAD2A;CC2D1A;LIN37;ZNF529;ZNF77;ZNF350;SMARCA4;SUPT5H;TCF3;NR1…
GO_BP	VIRAL_GENE_EXPRESSION	88	23	0.26	1.32e-05	1e-05	0.0171	NUP62;RPS5;RPS15;RPS19;RPS28;SMARCA4;SUPT5H;ZFP36;RPL13A;RPL36;RPL18;RPL18A;RPL28;RPS9;RPS11;GTF2F1;POLR2E;POLR2I;PTBP1;HPN;EIF3G;C19orf66;USF2
GO_BP	RNA_SPLICING	195	42	0.22	1.3e-06	3e-05	0.0257	DAZAP1;AKAP8L;ZBTB7A;PPP2R1A;WDR83;PRPF31;CELF5;SNRPD2;SF3A2;LSM4;LSM7;DDX39A;CHERP;HNRNPUL1;U2AF2;CIRBP;RAVER1;ELAVL1;U2AF1L4;GTF2F1;HNRNPL;HNRNPM;NOVA2;POLR2E;POLR2I;CCDC94;XAB2;PTBP1;SUGP1;CACTIN;UBL5;SNRNP70;SNRPA;RBM42;SYMPK;KHSRP;TSEN34;SUGP2;CLASRP;PRX;SCAF1;CCDC130
GO_BP	MRNA_PROCESSING	227	46	0.2	2.46e-06	3e-05	0.0257	DAZAP1;PRKACA;SAFB2;ERCC2;AKAP8L;ZBTB7A;PAF1;SUPT5H;WDR83;PRPF31;CELF5;SNRPD2;SF3A2;LSM4;LSM7;DDX39A;CHERP;HNRNPUL1;U2AF2;CIRBP;RAVER1;ELAVL1;U2AF1L4;GTF2F1;HNRNPL;HNRNPM;NOVA2;POLR2E;POLR2I;CCDC94;XAB2;PTBP1;SUGP1;CACTIN;UBL5;SNRNP70;SNRPA;RBM42;SYMPK;KHSRP;TSEN34;SAFB;ZNF473;SUGP2;CLASRP;SCAF1
GO_BP	RNA_SPLICING_VIA_TRANSESTERIFICATION_REACTIONS	151	34	0.23	4.81e-06	4e-05	0.0274	DAZAP1;ZBTB7A;WDR83;PRPF31;CELF5;SNRPD2;SF3A2;LSM4;LSM7;DDX39A;CHERP;HNRNPUL1;U2AF2;CIRBP;RAVER1;ELAVL1;U2AF1L4;GTF2F1;HNRNPL;HNRNPM;NOVA2;POLR2E;POLR2I;CCDC94;XAB2;PTBP1;SUGP1;CACTIN;UBL5;SNRNP70;SNRPA;RBM42;SYMPK;KHSRP
GO_BP	POSITIVE_REGULATION_OF_CELLULAR_PROTEIN_CATABOLIC_PROCESS	54	16	0.3	5.29e-05	6e-05	0.0342	CEBPA;SIRT2;FZR1;SIRT6;GLTSCR2;HAMP;APOE;PSMC4;DDA1;GSK3A;KEAP1;LDLR;RAD23A;HSPBP1;SGTA;TMEM259
GO_BP	POSITIVE_REGULATION_OF_PROTEIN_CATABOLIC_PROCESS	79	20	0.25	7.84e-05	7e-05	0.0342	CEBPA;SIRT2;FZR1;SIRT6;GLTSCR2;HAMP;APOE;PSMC4;DDA1;APC2;GSK3A;KEAP1;LDLR;OAZ1;NDUFA13;RAD23A;HSPBP1;SGTA;TMEM259;EGLN2
GO_BP	NUCLEAR_TRANSCRIBED_MRNA_CATABOLIC_PROCESS	91	21	0.23	0.000218	0.00016	0.0685	RPS5;RPS15;RPS19;RPS28;CNOT3;ZFP36;PPP2R1A;RPL13A;RPL36;SMG9;UPF1;RPL18;RPL18A;RPL28;RPS9;RPS11;DHX34;LSM4;LSM7;SAMD4B;EXOSC5
GO_MF	DNA_BINDING_TRANSCRIPTION_REPRESSOR_ACTIVITY	146	43	0.29	7.74e-09	1e-05	0.00116	NACC1;NR2F6;MYPOP;IRF3;ZBTB7A;CC2D1A;ZNF350;TCF3;MZF1;ZNF134;ZNF175;ZNF224;KLF16;ZBTB45;ZNF536;ZNF587B;ZNF559-ZNF177;ZNF266;ZNF491;ZNF440;ZNF560;ZNF582;ZNF599;ZNF558;ZNF555;ZNF550;ZNF846;ERF;ZIM2;HKR1;ZNF404;ZNF749;PEG3;ZNF529;ZNF77;ZNF69;ZNF177;ZNF180;ZNF557;ZNF614;ZNF559;ZNF566;ZNF439
GO_MF	SEQUENCE_SPECIFIC_DNA_BINDING	836	259	0.31	9.33e-12	<1.00E-05	<1.00E-03	ZNF540;RUVBL2;ZNF737;MEF2B;ZNF865;KLF2;CEBPA;ZNF211;CEBPG;ZNF234;ZNF274;ZNF460;NACC1;ZNF257;ZNF526;ZNF837;ZNF816;ZNF543;ZNF573;ZNF792;ZNF358;CRX;ZFP28;ZNF480;ZNF578;ZNF418;ZNF417;ZNF548;ZNF524;ZNF784;SIX5;ZNF420;ZNF565;ZNF583;ZNF714;ZNF569;DBP;ZNF836;ZNF610;ZNF320;ZNF497;ZNF296;ZNF564;ZNF567;ZNF383;ZNF780B;ZNF525;ZNF431;ZNF675;ZNF585A;NR2F6;ZFP30;ZNF549;ZNF324;ZNF345;ZNF473;ZNF285;ZNF544;ZNF547;Z…
GO_MF	CIS_REGULATORY_REGION_SEQUENCE_SPECIFIC_DNA_BINDING	600	195	0.33	4.88e-12	<1.00E-05	<1.00E-03	ZNF540;RUVBL2;ZNF737;MEF2B;ZNF865;KLF2;CEBPA;ZNF211;CEBPG;ZNF234;ZNF274;ZNF460;NACC1;ZNF257;ZNF526;ZNF837;ZNF816;ZNF543;ZNF573;ZNF792;ZNF358;CRX;ZFP28;ZNF480;ZNF578;ZNF418;ZNF417;ZNF548;ZNF524;ZNF784;SIX5;ZNF420;ZNF565;ZNF583;ZNF714;ZNF569;DBP;ZNF836;ZNF610;ZNF320;ZNF497;ZNF296;ZNF564;ZNF567;ZNF383;ZNF780B;ZNF525;ZNF431;ZNF675;ZNF585A;NR2F6;ZFP30;ZNF549;ZNF324;ZNF345;ZNF473;ZNF285;ZNF544;ZNF547;Z…
GO_MF	TRANSCRIPTION_REGULATOR_ACTIVITY	911	276	0.3	8.37e-12	<1.00E-05	<1.00E-03	ZNF540;RUVBL2;ZNF737;MEF2B;ZNF865;KLF2;CEBPA;ZNF211;CEBPG;ZNF234;ZNF274;ZNF460;NACC1;ZNF257;ZNF526;ZNF837;ZNF816;ZNF543;ZNF573;ZNF792;ZNF358;CRX;ZFP28;ZNF480;ZNF578;ZNF418;ZNF417;ZNF548;ZNF524;ZNF784;SIX5;ZNF420;ZNF565;ZNF583;ZNF714;ZNF569;DBP;ZNF836;ZNF610;ZNF320;ZNF497;ZNF296;ZNF564;ZNF567;ZNF383;ZNF780B;ZNF525;ZNF431;ZNF675;ZNF585A;NR2F6;ZFP30;ZNF549;ZNF324;ZNF345;ZNF473;ZNF285;ZNF544;ZNF547;Z…
GO_MF	DNA_BINDING_TRANSCRIPTION_FACTOR_ACTIVITY	719	244	0.34	1.32e-11	<1.00E-05	<1.00E-03	ZNF540;ZNF737;MEF2B;ZNF865;KLF2;CEBPA;ZNF211;CEBPG;ZNF234;ZNF274;ZNF460;NACC1;ZNF257;ZNF526;ZNF837;ZNF816;ZNF543;ZNF573;ZNF792;ZNF358;CRX;ZFP28;ZNF480;ZNF578;ZNF418;ZNF417;ZNF548;ZNF524;ZNF784;SIX5;ZNF420;ZNF565;ZNF583;ZNF714;ZNF569;DBP;ZNF836;ZNF610;ZNF320;ZNF497;ZNF296;ZNF564;ZNF567;ZNF383;ZNF780B;ZNF525;ZNF431;ZNF675;ZNF585A;NR2F6;ZFP30;ZNF549;ZNF324;ZNF345;ZNF473;ZNF285;ZNF544;ZNF547;ZIK1;ZNF…
REACTOME	RNA_POLYMERASE_II_TRANSCRIPTION	658	189	0.29	0	0	0	PRKACA;TGFB1;PPP2R1A;BAX;BBC3;PAF1;POLR2E;ERCC2;POLR2I;ELL;GTF2F1;MLLT1;SUPT5H;PSMC4;PSMD8;PIN1;APOE;SMARCA4;TCF3;MED25;MED26;CARM1;MED16;JUNB;FZR1;UBE2S;COX6B1;CCNE1;NOTCH3;SYMPK;STK11;TRIM28;PRDX2;GPI;NR1H2;TEAD2;MBD3;SIN3B;GATAD2A;ZNF350;KMT2B;PRMT1;CNOT3;ARID3A;ZNF420;NR2F6;POU2F2;SNAPC2;GAMT;U2AF2;U2AF1L4;DDX39A;ZNF473;ZNF582;ZNF112;ZNF506;ZNF324;ZNF671;ZNF416;ZNF586;ZNF446;ZNF264;ZNF302;ZNF…
REACTOME	PROTEIN_PROTEIN_INTERACTIONS_AT_SYNAPSES	24	10	0.42	0.000252	0.00021	0.0776	LIN7B;PPFIA3;GRIN2D;APBA3;HOMER3;PTPRS;LRFN3;LRFN1;LRRC4B;SHANK1
