# Supplementary material for: QTL mapping of human retina DNA methylation identifies 87 gene-epigenome interactions in age-related macular degeneration
Source: Nat Commun. 2024 Mar 4;15:1972. doi: 10.1038/s41467-024-46063-8 (PMC10912779; doi:10.1038/s41467-024-46063-8)
Supplement: Supplementary file 16 — Supplementary Data 13 [file 41467_2024_46063_MOESM16_ESM.xlsx]

## Sheet: Sheet1
Chr	exposure	trait	top_snp	Gene	bxy	bxy_se	bxy_pval	heidi_pval	Biotype	HEIDI_Pvalue_Significant
chr1	ENSG00000274895	cg14810798	rs66760546	AC011700.1	-0.0723106	0.00906861	1.53962e-15	0.146073	lncRNA	TRUE
chr1	ENSG00000274895	cg24083324	rs66760546	AC011700.1	0.069296	0.00971955	1.00696e-12	0.166785	lncRNA	TRUE
chr1	ENSG00000274895	cg05052969	rs66760546	AC011700.1	-0.0670225	0.0120128	2.41533e-08	0.30854	lncRNA	TRUE
chr1	ENSG00000223649	cg10512769	rs10863899	AC105275.1	-3.22247	0.431839	8.50836e-14	0.0144345	lncRNA	FALSE
chr1	ENSG00000223649	cg04923746	rs10863899	AC105275.1	-1.63299	0.247466	4.14418e-11	0.507953	lncRNA	TRUE
chr1	ENSG00000223649	cg06753273	rs10863899	AC105275.1	-2.31885	0.361309	1.38136e-10	0.177084	lncRNA	TRUE
chr1	ENSG00000223649	cg00658007	rs10863899	AC105275.1	-2.0783	0.324953	1.59824e-10	0.122037	lncRNA	TRUE
chr1	ENSG00000223649	cg24484971	rs10863899	AC105275.1	-1.42488	0.236965	1.82087e-09	0.304203	lncRNA	TRUE
chr1	ENSG00000117054	cg22875332	rs372334337	ACADM	0.245407	0.0328406	7.85877e-14	0.00125866	protein_coding	FALSE
chr1	ENSG00000117054	cg10523679	rs372334337	ACADM	0.150182	0.0220267	9.21956e-12	3.66909e-10	protein_coding	FALSE
chr1	ENSG00000117054	cg05258079	rs372334337	ACADM	0.0538629	0.0101555	1.13406e-07	0.0226389	protein_coding	FALSE
chr1	ENSG00000234996	cg19895521	rs2298261	ACTG1P25	-0.739715	0.147477	5.28105e-07		transcribed_processed_pseudogene	FALSE
chr1	ENSG00000143537	cg19352308	rs11264298	ADAM15	-0.117885	0.0223057	1.25725e-07	0.129861	protein_coding	TRUE
chr1	ENSG00000162688	cg27425127	rs7543433	AGL	-0.030609	0.00358134	1.26541e-17	0.00127709	protein_coding	FALSE
chr1	ENSG00000162688	cg25758167	rs7543433	AGL	-0.0179354	0.00219725	3.27752e-16	0.00504398	protein_coding	FALSE
chr1	ENSG00000162688	cg01933228	rs7543433	AGL	-0.0259364	0.00318215	3.62155e-16	0.00872128	protein_coding	FALSE
chr1	ENSG00000162688	cg10018845	rs7543433	AGL	0.00986132	0.00159747	6.69692e-10	0.210349	protein_coding	TRUE
chr1	ENSG00000162688	cg04308687	rs7543433	AGL	0.010606	0.00182741	6.48214e-09	0.091936	protein_coding	TRUE
chr1	ENSG00000162688	cg19693677	rs7543433	AGL	-0.013787	0.00251389	4.14999e-08	0.274649	protein_coding	TRUE
chr1	ENSG00000162688	cg20948262	rs7543433	AGL	0.0103083	0.00199954	2.53219e-07		protein_coding	FALSE
chr1	ENSG00000162688	cg03956908	rs7543433	AGL	-0.00708568	0.00139316	3.65631e-07	0.6261	protein_coding	TRUE
chr1	ENSG00000162688	cg14063843	rs7543433	AGL	-0.00963936	0.00194025	6.76106e-07	0.42216	protein_coding	TRUE
chr1	ENSG00000004455	cg04306220	rs10914636	AK2	-0.126869	0.020051	2.49488e-10	0.141108	protein_coding	TRUE
chr1	ENSG00000004455	cg12731430	rs10914636	AK2	0.0364311	0.00741983	9.10945e-07	0.0651484	protein_coding	TRUE
chr1	ENSG00000117448	cg26899948	rs34790216	AKR1A1	0.218672	0.0434116	4.72433e-07	0.144196	protein_coding	TRUE
chr1	ENSG00000117448	cg24296786	rs34790216	AKR1A1	-0.128796	0.0260072	7.33282e-07	0.948106	protein_coding	TRUE
chr1	ENSG00000280114	cg09004167	rs1977269	AL021920.2	1.68674	0.334208	4.48851e-07	0.210689	unprocessed_pseudogene	TRUE
chr1	ENSG00000268575	cg24525340	rs7407	AL031282.2	-0.0533305	0.00942681	1.53753e-08	0.0207971	lncRNA	FALSE
chr1	ENSG00000268575	cg03396347	rs36050429	AL031282.2	0.164136	0.0295857	2.89257e-08	0.00230463	lncRNA	FALSE
chr1	ENSG00000268575	cg08967668	rs36050429	AL031282.2	-0.104319	0.0191572	5.16851e-08	0.0225276	lncRNA	FALSE
chr1	ENSG00000268575	cg16990280	rs36050429	AL031282.2	-0.116573	0.0214211	5.27016e-08	0.848946	lncRNA	TRUE
chr1	ENSG00000268575	cg11456906	rs36050429	AL031282.2	0.112022	0.0206476	5.7814e-08	0.02919	lncRNA	FALSE
chr1	ENSG00000268575	cg19684894	rs36050429	AL031282.2	0.170888	0.0315759	6.23349e-08	0.00481209	lncRNA	FALSE
chr1	ENSG00000268575	cg17747265	rs36050429	AL031282.2	0.183683	0.0346558	1.15673e-07	0.00115926	lncRNA	FALSE
chr1	ENSG00000272491	cg19377703	rs1416047	AL109659.2	0.736144	0.149392	8.3244e-07	0.0259674	lncRNA	FALSE
chr1	ENSG00000271853	cg08477332	rs28510471	AL162258.1	-4.24204	0.714501	2.90165e-09	0.227791	lncRNA	TRUE
chr1	ENSG00000271853	cg26548293	rs28510471	AL162258.1	1.75275	0.297882	4.00353e-09	0.0310024	lncRNA	FALSE
chr1	ENSG00000271853	cg26148377	rs28510471	AL162258.1	1.95192	0.335362	5.87224e-09	0.000352012	lncRNA	FALSE
chr1	ENSG00000271853	cg16348003	rs28510471	AL162258.1	-1.27755	0.239066	9.09675e-08	0.509332	lncRNA	TRUE
chr1	ENSG00000271853	cg01347250	rs28510471	AL162258.1	-1.14357	0.220642	2.18458e-07	0.843295	lncRNA	TRUE
chr1	ENSG00000271853	cg04077668	rs28510471	AL162258.1	-0.801918	0.15652	3.00056e-07	0.629023	lncRNA	TRUE
chr1	ENSG00000271853	cg16282977	rs28510471	AL162258.1	0.888655	0.177292	5.37571e-07	0.0286181	lncRNA	FALSE
chr1	ENSG00000270605	cg10110780	rs479144	AL353622.1	-0.243775	0.013252	1.43082e-75	0.55365	lncRNA	TRUE
chr1	ENSG00000270605	cg04993605	rs479144	AL353622.1	-0.210717	0.012208	9.31148e-67	0.626889	lncRNA	TRUE
chr1	ENSG00000270605	cg02251754	rs479144	AL353622.1	-0.0838833	0.00672747	1.10499e-35	0.0307512	lncRNA	FALSE
chr1	ENSG00000270605	cg11975685	rs479144	AL353622.1	-0.063618	0.00607116	1.08194e-25	0.101897	lncRNA	TRUE
chr1	ENSG00000270605	cg05045517	rs479144	AL353622.1	-0.041782	0.0042133	3.52242e-23	0.532852	lncRNA	TRUE
chr1	ENSG00000270605	cg14852267	rs479144	AL353622.1	-0.0318891	0.00385533	1.32374e-16	0.244491	lncRNA	TRUE
chr1	ENSG00000270605	cg07913096	rs479144	AL353622.1	-0.0347803	0.00421453	1.55146e-16	0.239447	lncRNA	TRUE
chr1	ENSG00000270605	cg07148744	rs479144	AL353622.1	-0.0260295	0.00337176	1.16472e-14	0.601872	lncRNA	TRUE
chr1	ENSG00000270605	cg26058965	rs479144	AL353622.1	-0.0269461	0.00380196	1.36633e-12	0.365976	lncRNA	TRUE
chr1	ENSG00000270605	cg21577315	rs479144	AL353622.1	-0.0127936	0.00199273	1.36132e-10	0.235823	lncRNA	TRUE
chr1	ENSG00000270605	cg15374471	rs479144	AL353622.1	-0.01407	0.00226222	4.98524e-10	0.966857	lncRNA	TRUE
chr1	ENSG00000272195	cg19716264	rs10623979	AL356512.1	0.695714	0.0983673	1.52039e-12	0.0822383	lncRNA	TRUE
chr1	ENSG00000272195	cg06992877	rs10623979	AL356512.1	0.439463	0.0686205	1.51115e-10	0.282957	lncRNA	TRUE
chr1	ENSG00000272195	cg08289927	rs61844237	AL356512.1	-0.419152	0.0839516	5.95155e-07	0.354612	lncRNA	TRUE
chr1	ENSG00000270035	cg25763306	rs34600274	AL359881.2	-0.894636	0.129289	4.52669e-12	0.689281	lncRNA	TRUE
chr1	ENSG00000270171	cg25763306	rs4908684	AL359881.3	-0.101367	0.0144697	2.46077e-12	0.000238528	lncRNA	FALSE
chr1	ENSG00000270171	cg09696653	rs7551807	AL359881.3	-0.0477317	0.00919473	2.08934e-07	0.00440875	lncRNA	FALSE
chr1	ENSG00000270171	cg01444397	rs12143374	AL359881.3	0.0473131	0.00954919	7.24539e-07	0.000428999	lncRNA	FALSE
chr1	ENSG00000259865	cg01114613	rs56065612	AL390728.6	0.343816	0.0668548	2.70788e-07	0.523704	lncRNA	TRUE
chr1	ENSG00000236782	cg24519413	rs2783707	AL391650.1	-0.0896613	0.0143534	4.19272e-10	0.396692	protein_coding	TRUE
chr1	ENSG00000236782	cg03844060	rs2783707	AL391650.1	-0.0889752	0.0155397	1.03034e-08	0.0632399	protein_coding	TRUE
chr1	ENSG00000272420	cg12131894	rs7366927	AL513477.2	0.427574	0.0858972	6.43289e-07	0.0376582	lncRNA	FALSE
chr1	ENSG00000272668	cg23902969	rs34413912	AL590560.3	-0.262359	0.030547	8.79495e-18	0.585089	lncRNA	TRUE
chr1	ENSG00000272668	cg21598751	rs11591079	AL590560.3	-3.826	0.697993	4.21897e-08	0.472948	lncRNA	TRUE
chr1	ENSG00000260855	cg15390314	rs6682907	AL591848.3	-0.459861	0.0872791	1.37281e-07	0.0885298	lncRNA	TRUE
chr1	ENSG00000230896	cg26899948	rs35993035	AL604028.1	-1.69976	0.331956	3.0482e-07	0.141464	lncRNA	TRUE
chr1	ENSG00000230896	cg03146154	rs35993035	AL604028.1	-0.914257	0.181074	4.43929e-07	0.156238	lncRNA	TRUE
chr1	ENSG00000230896	cg04181682	rs35993035	AL604028.1	2.79839	0.567436	8.15448e-07	0.215392	lncRNA	TRUE
chr1	ENSG00000234329	cg03146154	rs79086794	AL604028.2	1.33764	0.269096	6.66503e-07	0.680067	processed_pseudogene	TRUE
chr1	ENSG00000272512	cg18432292	rs9442391	AL645608.7	0.628667	0.11818	1.0402e-07	0.575703	lncRNA	TRUE
chr1	ENSG00000272512	cg09363892	rs9442391	AL645608.7	-0.387996	0.076849	4.44575e-07	0.264025	lncRNA	TRUE
chr1	ENSG00000162551	cg22943875	rs1256344	ALPL	-0.0377183	0.00440448	1.09374e-17	0.644244	protein_coding	TRUE
chr1	ENSG00000162551	cg12062270	rs1256344	ALPL	-0.04148	0.0048504	1.21101e-17	0.33334	protein_coding	TRUE
chr1	ENSG00000162551	cg06346857	rs1256344	ALPL	-0.0211645	0.00333059	2.09015e-10	0.124218	protein_coding	TRUE
chr1	ENSG00000162551	cg01037895	rs1256344	ALPL	-0.0151802	0.00240217	2.62662e-10	0.101303	protein_coding	TRUE
chr1	ENSG00000181754	cg23387929	rs2570972	AMIGO1	-0.0263186	0.00518351	3.82696e-07	0.0615627	protein_coding	TRUE
chr1	ENSG00000183831	ch.1.173201084F	rs60537311	ANKRD45	-0.282273	0.0471563	2.152e-09	0.172257	protein_coding	TRUE
chr1	ENSG00000235098	cg00060374	rs3766165	ANKRD65	-0.503785	0.0739891	9.83384e-12	0.00342024	protein_coding	FALSE
chr1	ENSG00000235098	cg18546249	rs1695825	ANKRD65	-0.45723	0.0852867	8.27189e-08	0.205801	protein_coding	TRUE
chr1	ENSG00000235098	cg15633699	rs3766165	ANKRD65	-0.341625	0.0650236	1.48948e-07	0.886776	protein_coding	TRUE
chr1	ENSG00000235098	cg04232698	rs3766165	ANKRD65	0.419483	0.0846349	7.18164e-07	0.0902979	protein_coding	TRUE
chr1	ENSG00000132694	cg09854709	rs822429	ARHGEF11	-0.150808	0.0218245	4.84605e-12	0.448199	protein_coding	TRUE
chr1	ENSG00000132694	cg20584566	rs822429	ARHGEF11	0.123172	0.0183585	1.95623e-11	0.653387	protein_coding	TRUE
chr1	ENSG00000132694	cg06874172	rs822429	ARHGEF11	0.0682741	0.0111053	7.85261e-10	0.58166	protein_coding	TRUE
chr1	ENSG00000132694	cg25149551	rs822429	ARHGEF11	0.0405873	0.0068748	3.55264e-09	0.984033	protein_coding	TRUE
chr1	ENSG00000130762	cg24371534	rs6667361	ARHGEF16	-0.248473	0.0363671	8.3531e-12	0.379424	protein_coding	TRUE
chr1	ENSG00000130762	cg16097329	rs6667361	ARHGEF16	-0.0848133	0.0148438	1.10531e-08	0.881125	protein_coding	TRUE
chr1	ENSG00000143437	cg13175981	rs12568757	ARNT	-0.0156868	0.00248068	2.55568e-10	0.0307114	protein_coding	FALSE
chr1	ENSG00000143437	cg04414720	rs12568757	ARNT	0.0474012	0.0078448	1.51865e-09	0.00415737	protein_coding	FALSE
chr1	ENSG00000143437	cg09365446	rs12568757	ARNT	0.0363356	0.0060354	1.73976e-09	0.00309501	protein_coding	FALSE
chr1	ENSG00000117407	cg13964099	rs783304	ARTN	-0.873575	0.147421	3.10899e-09	0.0607858	protein_coding	TRUE
chr1	ENSG00000117407	cg12908607	rs783304	ARTN	1.48823	0.275847	6.84693e-08	0.0439484	protein_coding	FALSE
chr1	ENSG00000160072	cg26332488	rs9329412	ATAD3B	0.233991	0.044125	1.13975e-07	0.197532	protein_coding	TRUE
chr1	ENSG00000160072	cg09172260	rs9329412	ATAD3B	-0.13172	0.0252363	1.79437e-07	0.203744	protein_coding	TRUE
chr1	ENSG00000160072	cg16347928	rs9329412	ATAD3B	0.283561	0.0543947	1.85787e-07	0.196024	protein_coding	TRUE
chr1	ENSG00000160072	cg15875062	rs9329412	ATAD3B	-0.103616	0.0209633	7.70323e-07	0.191798	protein_coding	TRUE
chr1	ENSG00000130770	cg10110780	rs6691903	ATP5IF1	-0.222274	0.0159225	2.74309e-44	0.165423	protein_coding	TRUE
chr1	ENSG00000130770	cg04993605	rs6691903	ATP5IF1	-0.192171	0.0142943	3.34154e-41	0.390983	protein_coding	TRUE
chr1	ENSG00000130770	cg02251754	rs6691903	ATP5IF1	-0.0768502	0.00709492	2.43513e-27	0.028192	protein_coding	FALSE
chr1	ENSG00000130770	cg11975685	rs6691903	ATP5IF1	-0.0582011	0.00617099	4.04625e-21	0.264609	protein_coding	TRUE
chr1	ENSG00000130770	cg05045517	rs6691903	ATP5IF1	-0.0370018	0.00428289	5.64877e-18	0.167505	protein_coding	TRUE
chr1	ENSG00000130770	cg14852267	rs6691903	ATP5IF1	-0.0289898	0.00378334	1.8235e-14	0.47419	protein_coding	TRUE
chr1	ENSG00000130770	cg07913096	rs6691903	ATP5IF1	-0.0312191	0.00414654	5.11455e-14	0.149706	protein_coding	TRUE
chr1	ENSG00000130770	cg07148744	rs6691903	ATP5IF1	-0.0231777	0.00329493	2.00174e-12	0.293837	protein_coding	TRUE
chr1	ENSG00000130770	cg26058965	rs6691903	ATP5IF1	-0.0241647	0.00367549	4.88049e-11	0.27844	protein_coding	TRUE
chr1	ENSG00000130770	cg21577315	rs6691903	ATP5IF1	-0.0116711	0.00190405	8.80845e-10	0.10243	protein_coding	TRUE
chr1	ENSG00000130770	cg15374471	rs6691903	ATP5IF1	-0.0128404	0.00215609	2.59398e-09	0.797522	protein_coding	TRUE
chr1	ENSG00000162779	cg03732293	rs16853998	AXDND1	0.504987	0.070276	6.68301e-13	0.00340971	protein_coding	FALSE
chr1	ENSG00000162779	cg00255405	rs16853998	AXDND1	0.612249	0.10281	2.59814e-09	0.620754	protein_coding	TRUE
chr1	ENSG00000176022	cg20411340	rs367679479	B3GALT6	0.498693	0.0682259	2.68257e-13	0.455073	protein_coding	TRUE
chr1	ENSG00000176022	cg09331144	rs367679479	B3GALT6	0.648284	0.0923046	2.16679e-12	0.254246	protein_coding	TRUE
chr1	ENSG00000176022	cg24034746	rs367679479	B3GALT6	0.476895	0.0770994	6.19232e-10	0.343205	protein_coding	TRUE
chr1	ENSG00000176022	cg00211609	rs367679479	B3GALT6	0.243258	0.0406131	2.10284e-09	0.479796	protein_coding	TRUE
chr1	ENSG00000176022	cg02279987	rs367679479	B3GALT6	0.272154	0.0472521	8.4309e-09	0.406987	protein_coding	TRUE
chr1	ENSG00000176022	cg26314055	rs367679479	B3GALT6	0.729096	0.129586	1.84085e-08	0.203935	protein_coding	TRUE
chr1	ENSG00000116922	cg16341373	rs684260	C1orf109	0.467696	0.0802917	5.71229e-09	0.24207	protein_coding	TRUE
chr1	ENSG00000119280	cg12875393	rs12028750	C1orf198	-0.043704	0.00816542	8.683e-08	0.511154	protein_coding	TRUE
chr1	ENSG00000081248	cg08885800	rs2057580	CACNA1S	-0.311028	0.0471374	4.15777e-11	0.842221	protein_coding	TRUE
chr1	ENSG00000081248	cg17766148	rs2057580	CACNA1S	-0.255523	0.0417215	9.09745e-10	0.570959	protein_coding	TRUE
chr1	ENSG00000081248	cg12527475	rs2057580	CACNA1S	-0.196251	0.0330543	2.89868e-09	0.933953	protein_coding	TRUE
chr1	ENSG00000081248	cg23594461	rs2057580	CACNA1S	-0.13701	0.0235894	6.31739e-09	0.810671	protein_coding	TRUE
chr1	ENSG00000132906	cg18379824	rs6667862	CASP9	0.290074	0.0380528	2.47983e-14	0.0574776	protein_coding	TRUE
chr1	ENSG00000132906	cg04708753	rs6667862	CASP9	0.466492	0.0635538	2.13401e-13	0.128265	protein_coding	TRUE
chr1	ENSG00000132906	cg09992259	rs34667779	CASP9	-0.316466	0.0586659	6.87653e-08	0.517623	protein_coding	TRUE
chr1	ENSG00000280670	cg03123370	rs6688516	CCDC163	0.0661621	0.00740729	4.18283e-19	0.569742	protein_coding	TRUE
chr1	ENSG00000280670	cg11803389	rs6688516	CCDC163	-0.04306	0.00568962	3.78494e-14	0.815908	protein_coding	TRUE
chr1	ENSG00000280670	cg26899948	rs6688516	CCDC163	0.0520448	0.00823291	2.5894e-10	2.02407e-09	protein_coding	FALSE
chr1	ENSG00000280670	cg24296786	rs6688516	CCDC163	-0.0301857	0.00507046	2.62878e-09	0.00077801	protein_coding	FALSE
chr1	ENSG00000280670	cg03146154	rs9429085	CCDC163	0.0379888	0.00720045	1.32115e-07	8.57334e-07	protein_coding	FALSE
chr1	ENSG00000223745	cg09936581	rs139953961	CCDC18-AS1	-0.00782644	0.00126926	6.99843e-10	0.316832	lncRNA	TRUE
chr1	ENSG00000196352	cg00797651	rs71909776	CD55	-0.264016	0.0345253	2.05692e-14	0.349972	protein_coding	TRUE
chr1	ENSG00000196352	cg19825186	rs71909776	CD55	-0.102375	0.0200173	3.14853e-07	0.639814	protein_coding	TRUE
chr1	ENSG00000143776	cg03890680	rs16846989	CDC42BPA	-0.0170322	0.00292179	5.56429e-09	0.0788482	protein_coding	TRUE
chr1	ENSG00000143776	cg20269993	rs10737427	CDC42BPA	0.0224677	0.00456148	8.41325e-07	0.0450848	protein_coding	FALSE
chr1	ENSG00000134690	cg12339802	rs2306626	CDCA8	-3.68759	0.583202	2.56536e-10	0.564328	protein_coding	TRUE
chr1	ENSG00000134690	cg24088508	rs2306626	CDCA8	-4.20951	0.667972	2.93969e-10	0.40793	protein_coding	TRUE
chr1	ENSG00000134690	cg06917450	rs2306626	CDCA8	-2.48723	0.397789	4.03618e-10	0.659574	protein_coding	TRUE
chr1	ENSG00000134690	cg27170260	rs2306626	CDCA8	-2.1334	0.352751	1.46766e-09	0.502171	protein_coding	TRUE
chr1	ENSG00000175279	cg15888996	rs70997231	CENPS	-1.90905	0.372093	2.88842e-07	0.400879	protein_coding	TRUE
chr1	ENSG00000116198	cg00889473	rs7522227	CEP104	-0.0447702	0.00878142	3.42747e-07	0.0745131	protein_coding	TRUE
chr1	ENSG00000116198	cg12744321	rs7522227	CEP104	-0.0340742	0.00692058	8.496e-07	0.0318712	protein_coding	FALSE
chr1	ENSG00000130695	cg24565143	rs12410600	CEP85	0.048001	0.00961157	5.9114e-07	0.959558	protein_coding	TRUE
chr1	ENSG00000131778	cg21917976	rs10900330	CHD1L	-0.0420631	0.00636554	3.897e-11	0.0791567	protein_coding	TRUE
chr1	ENSG00000131778	cg26010182	rs4950310	CHD1L	-0.14779	0.0235919	3.74218e-10	0.0565921	protein_coding	TRUE
chr1	ENSG00000131778	cg11120551	rs10900330	CHD1L	-0.0381824	0.00615598	5.55778e-10	0.0530397	protein_coding	TRUE
chr1	ENSG00000131778	cg07572770	rs10900330	CHD1L	-0.0534189	0.00917027	5.70362e-09	0.0701657	protein_coding	TRUE
chr1	ENSG00000131778	cg11983977	rs10900330	CHD1L	-0.0555039	0.00956964	6.63139e-09	0.0151588	protein_coding	FALSE
chr1	ENSG00000159208	cg08130307	rs7366347	CIART	0.0535345	0.00731099	2.4346e-13	0.900073	protein_coding	TRUE
chr1	ENSG00000159208	cg09082263	rs7366347	CIART	-0.0553367	0.00761558	3.69605e-13	0.913494	protein_coding	TRUE
chr1	ENSG00000159208	cg03851496	rs7366347	CIART	0.0326891	0.00631742	2.28601e-07	0.988394	protein_coding	TRUE
chr1	ENSG00000143786	cg21058413	rs4654037	CNIH3	-0.597514	0.110563	6.50583e-08	0.482821	protein_coding	TRUE
chr1	ENSG00000143771	cg21058413	rs7536608	CNIH4	-0.140549	0.0219907	1.64464e-10	0.283262	protein_coding	TRUE
chr1	ENSG00000142675	cg20415053	rs8768	CNKSR1	0.414713	0.0532026	6.44231e-15	0.0432618	protein_coding	FALSE
chr1	ENSG00000142675	cg08133631	rs8768	CNKSR1	0.230517	0.0387522	2.70625e-09	0.110101	protein_coding	TRUE
chr1	ENSG00000142675	cg11887554	rs8768	CNKSR1	-0.101445	0.0187628	6.41836e-08	0.947709	protein_coding	TRUE
chr1	ENSG00000142675	cg03340041	rs8768	CNKSR1	-0.0931286	0.0173447	7.90524e-08	0.820079	protein_coding	TRUE
chr1	ENSG00000142675	cg07916101	rs8768	CNKSR1	0.135166	0.0272457	7.01336e-07	0.485902	protein_coding	TRUE
chr1	ENSG00000231663	cg04205689	rs115432468	COA6-AS1	0.236191	0.0456444	2.28403e-07	0.851101	lncRNA	TRUE
chr1	ENSG00000163050	cg04526825	rs1800674	COQ8A	0.209799	0.0377249	2.67809e-08	0.329491	protein_coding	TRUE
chr1	ENSG00000163050	cg08708961	rs1800674	COQ8A	-0.246607	0.0474528	2.02661e-07	0.635149	protein_coding	TRUE
chr1	ENSG00000143578	cg06600967	rs6661009	CREB3L4	-0.226483	0.0432914	1.68048e-07	0.364714	protein_coding	TRUE
chr1	ENSG00000143162	cg24693760	rs57323848	CREG1	-0.064634	0.00583968	1.79204e-28	0.00233543	protein_coding	FALSE
chr1	ENSG00000143162	cg17936236	rs57323848	CREG1	-0.024142	0.00295149	2.84762e-16	0.907229	protein_coding	TRUE
chr1	ENSG00000143162	cg19948045	rs57323848	CREG1	-0.0131867	0.00201783	6.35838e-11	0.653138	protein_coding	TRUE
chr1	ENSG00000143162	cg01169725	rs57323848	CREG1	-0.0133343	0.00239552	2.60167e-08	0.91644	protein_coding	TRUE
chr1	ENSG00000143162	cg09995475	rs2982471	CREG1	0.0129386	0.00248535	1.93e-07	0.346408	protein_coding	TRUE
chr1	ENSG00000143162	cg27153316	rs2982471	CREG1	-0.0148619	0.00299876	7.19554e-07	0.193738	protein_coding	TRUE
chr1	ENSG00000080947	cg07925738	rs156912	CROCCP3	-0.190599	0.0376762	4.2173e-07	0.380947	transcribed_unprocessed_pseudogene	TRUE
chr1	ENSG00000116791	cg21906852	rs7527057	CRYZ	0.120984	0.0236833	3.24871e-07	0.799425	protein_coding	TRUE
chr1	ENSG00000143387	cg13175981	rs4970976	CTSK	-0.0220589	0.00322052	7.41144e-12	0.00349533	protein_coding	FALSE
chr1	ENSG00000143387	cg04414720	rs4970976	CTSK	0.0678062	0.0102453	3.63403e-11	0.000188606	protein_coding	FALSE
chr1	ENSG00000143387	cg09365446	rs4970976	CTSK	0.0518818	0.00788928	4.82486e-11	0.000101854	protein_coding	FALSE
chr1	ENSG00000163131	cg09365446	rs113147464	CTSS	0.225129	0.035634	2.65255e-10	0.125664	protein_coding	TRUE
chr1	ENSG00000163131	cg13175981	rs113147464	CTSS	-0.0917585	0.0145907	3.19854e-10	0.0284067	protein_coding	FALSE
chr1	ENSG00000163131	cg04414720	rs113147464	CTSS	0.285023	0.045949	5.53836e-10	0.176788	protein_coding	TRUE
chr1	ENSG00000240194	cg15365029	rs12072603	CYMP	-0.893012	0.168493	1.15799e-07	0.0228486	transcribed_unitary_pseudogene	FALSE
chr1	ENSG00000240194	cg26736888	rs12072603	CYMP	0.267926	0.0542783	7.96749e-07	0.0660808	transcribed_unitary_pseudogene	TRUE
chr1	ENSG00000132676	cg16859077	rs12039893	DAP3	-0.192888	0.0317028	1.17027e-09	0.058672	protein_coding	TRUE
chr1	ENSG00000132676	cg00504075	rs12039893	DAP3	0.124427	0.0208014	2.20861e-09	0.156831	protein_coding	TRUE
chr1	ENSG00000132676	cg12738981	rs12039893	DAP3	-0.0495597	0.00905977	4.49273e-08	0.381254	protein_coding	TRUE
chr1	ENSG00000117593	ch.1.173201084F	rs2009083	DARS2	-0.230569	0.0463711	6.61806e-07	0.475586	protein_coding	TRUE
chr1	ENSG00000163354	cg19352308	rs11264297	DCST2	0.0536606	0.00848632	2.5622e-10	0.0792896	protein_coding	TRUE
chr1	ENSG00000163354	cg21504176	rs11264297	DCST2	0.0359858	0.00646893	2.65374e-08	0.593431	protein_coding	TRUE
chr1	ENSG00000118197	cg21146967	rs34428088	DDX59	0.10861	0.0199023	4.83884e-08	0.00309795	protein_coding	FALSE
chr1	ENSG00000160049	cg15888996	rs11121572	DFFA	-0.557253	0.0998353	2.38139e-08	0.371983	protein_coding	TRUE
chr1	ENSG00000169598	cg06398147	rs12094819	DFFB	-0.0826671	0.0132736	4.72631e-10	0.769878	protein_coding	TRUE
chr1	ENSG00000169598	cg16140954	rs12094819	DFFB	0.0825561	0.0145211	1.30618e-08	0.593724	protein_coding	TRUE
chr1	ENSG00000117682	cg23229016	rs1002488	DHDDS	-0.18686	0.0373732	5.73779e-07	0.0376581	protein_coding	FALSE
chr1	ENSG00000204624	cg05454848	rs3099633	DISP3	-0.189154	0.0124847	7.48206e-52	0.890668	protein_coding	TRUE
chr1	ENSG00000204624	cg20921146	rs3099633	DISP3	-0.20842	0.0138442	3.21899e-51	0.85367	protein_coding	TRUE
chr1	ENSG00000204624	cg23589174	rs3099633	DISP3	-0.153026	0.0106965	2.00295e-46	0.836784	protein_coding	TRUE
chr1	ENSG00000204624	cg14966878	rs3099633	DISP3	-0.186701	0.0131687	1.26121e-45	0.554674	protein_coding	TRUE
chr1	ENSG00000204624	cg13416772	rs3099633	DISP3	-0.0988313	0.00740569	1.26149e-40	0.896782	protein_coding	TRUE
chr1	ENSG00000204624	cg05379302	rs3099633	DISP3	-0.17237	0.0129982	3.89165e-40	0.422809	protein_coding	TRUE
chr1	ENSG00000204624	cg10276597	rs3099633	DISP3	-0.100329	0.00756589	3.91372e-40	0.959173	protein_coding	TRUE
chr1	ENSG00000204624	cg01551238	rs3099633	DISP3	-0.0921603	0.00718475	1.15439e-37	0.897888	protein_coding	TRUE
chr1	ENSG00000204624	cg09103812	rs3099633	DISP3	-0.11621	0.00926784	4.56682e-36	0.474537	protein_coding	TRUE
chr1	ENSG00000204624	cg22906400	rs3099633	DISP3	-0.0998818	0.00806666	3.26879e-35	0.793179	protein_coding	TRUE
chr1	ENSG00000204624	cg19434000	rs3099633	DISP3	0.0281519	0.00300255	6.85267e-21	0.614493	protein_coding	TRUE
chr1	ENSG00000204624	cg05155746	rs3099633	DISP3	-0.0243167	0.00272096	4.00555e-19	0.236698	protein_coding	TRUE
chr1	ENSG00000204624	cg17028912	rs3099633	DISP3	-0.0555528	0.00645285	7.36761e-18	0.659918	protein_coding	TRUE
chr1	ENSG00000204624	cg13017573	rs3099633	DISP3	0.0254608	0.00298617	1.51177e-17	0.995842	protein_coding	TRUE
chr1	ENSG00000204624	cg04027328	rs3099633	DISP3	-0.0291647	0.00377118	1.04577e-14	0.843561	protein_coding	TRUE
chr1	ENSG00000204624	cg16733203	rs3099633	DISP3	-0.0563683	0.00740647	2.72637e-14	0.424998	protein_coding	TRUE
chr1	ENSG00000204624	cg03386086	rs3099633	DISP3	0.0331305	0.00448644	1.5292e-13	0.943726	protein_coding	TRUE
chr1	ENSG00000204624	cg26947569	rs3099633	DISP3	-0.0364327	0.00511475	1.05563e-12	0.78155	protein_coding	TRUE
chr1	ENSG00000204624	cg08243619	rs3099633	DISP3	-0.0320638	0.00483896	3.4451e-11	0.0983447	protein_coding	TRUE
chr1	ENSG00000204624	cg13218558	rs3099633	DISP3	0.0224423	0.00353051	2.06175e-10	0.893511	protein_coding	TRUE
chr1	ENSG00000204624	cg04788705	rs3099633	DISP3	-0.0208806	0.0033612	5.22266e-10	0.701453	protein_coding	TRUE
chr1	ENSG00000204624	cg26643377	rs3099633	DISP3	0.0185749	0.00341366	5.28769e-08	0.918809	protein_coding	TRUE
chr1	ENSG00000204624	cg02148001	rs3099633	DISP3	0.0239083	0.00460798	2.12037e-07	0.431169	protein_coding	TRUE
chr1	ENSG00000204624	cg01615673	rs3099633	DISP3	-0.0174055	0.003488	6.03507e-07	0.143009	protein_coding	TRUE
chr1	ENSG00000162616	cg24795785	rs41311176	DNAJB4	-0.0498258	0.00851308	4.83211e-09	0.423554	protein_coding	TRUE
chr1	ENSG00000162616	cg09148021	rs41311176	DNAJB4	-0.0727322	0.0136886	1.07644e-07	0.319782	protein_coding	TRUE
chr1	ENSG00000116675	cg05531421	rs942861	DNAJC6	0.0331351	0.00582905	1.31218e-08	0.0866556	protein_coding	TRUE
chr1	ENSG00000163879	cg17933807	rs7530630	DNALI1	-0.0520773	0.00721132	5.138e-13	0.000213755	protein_coding	FALSE
chr1	ENSG00000163879	cg11305072	rs7530630	DNALI1	0.0235568	0.00364211	9.93841e-11	0.360456	protein_coding	TRUE
chr1	ENSG00000163879	cg12696750	rs7530630	DNALI1	-0.0250127	0.00437249	1.06227e-08	0.000428461	protein_coding	FALSE
chr1	ENSG00000163879	cg25118706	rs2294875	DNALI1	-0.0190717	0.00351771	5.90579e-08	0.114891	protein_coding	TRUE
chr1	ENSG00000163879	cg11365623	rs2294875	DNALI1	-0.0285725	0.00569254	5.18632e-07	0.00706855	protein_coding	FALSE
chr1	ENSG00000156171	cg23874078	rs3795823	DRAM2	0.124268	0.0154861	1.01989e-15	0.402879	protein_coding	TRUE
chr1	ENSG00000133059	cg00857998	rs11577406	DSTYK	0.0326324	0.00648609	4.87591e-07	0.90708	protein_coding	TRUE
chr1	ENSG00000133059	cg11170025	rs11577406	DSTYK	0.0466734	0.0093861	6.60599e-07	0.0748069	protein_coding	TRUE
chr1	ENSG00000121310	cg27535305	rs34588418	ECHDC2	-0.0507941	0.00781046	7.85539e-11	0.314167	protein_coding	TRUE
chr1	ENSG00000121310	cg01802117	rs34588418	ECHDC2	-0.107633	0.0166487	1.01362e-10	0.28338	protein_coding	TRUE
chr1	ENSG00000121310	cg05909164	rs34588418	ECHDC2	-0.0715468	0.0110828	1.07755e-10	0.11294	protein_coding	TRUE
chr1	ENSG00000121310	cg25767906	rs34588418	ECHDC2	-0.0601417	0.009386	1.47838e-10	0.272304	protein_coding	TRUE
chr1	ENSG00000121310	cg02813845	rs34588418	ECHDC2	-0.0733424	0.0114646	1.5813e-10	0.393384	protein_coding	TRUE
chr1	ENSG00000121310	cg24543286	rs34588418	ECHDC2	-0.0611166	0.00956012	1.62797e-10	0.23394	protein_coding	TRUE
chr1	ENSG00000121310	cg20055417	rs34588418	ECHDC2	-0.0843068	0.0132252	1.83307e-10	0.272666	protein_coding	TRUE
chr1	ENSG00000121310	cg12220753	rs34588418	ECHDC2	-0.0652265	0.0102597	2.05004e-10	0.238018	protein_coding	TRUE
chr1	ENSG00000121310	cg03609269	rs34588418	ECHDC2	-0.0543476	0.00859785	2.59753e-10	0.374815	protein_coding	TRUE
chr1	ENSG00000121310	cg03579872	rs34588418	ECHDC2	-0.0377759	0.00605737	4.47894e-10	0.38975	protein_coding	TRUE
chr1	ENSG00000121310	cg05232215	rs34588418	ECHDC2	-0.0650025	0.0105922	8.41905e-10	0.368134	protein_coding	TRUE
chr1	ENSG00000121310	cg08859206	rs34588418	ECHDC2	-0.0582087	0.00951966	9.68129e-10	0.437251	protein_coding	TRUE
chr1	ENSG00000121310	cg13685833	rs34588418	ECHDC2	-0.0673657	0.011993	1.94181e-08	0.329738	protein_coding	TRUE
chr1	ENSG00000121310	cg06600287	rs34588418	ECHDC2	-0.023196	0.00428714	6.28131e-08	0.817686	protein_coding	TRUE
chr1	ENSG00000121310	cg04527603	rs34588418	ECHDC2	-0.0169427	0.00325326	1.90961e-07	0.306114	protein_coding	TRUE
chr1	ENSG00000121310	cg24675658	rs34588418	ECHDC2	-0.0159468	0.00307631	2.17473e-07	0.164278	protein_coding	TRUE
chr1	ENSG00000121310	cg16325326	rs34588418	ECHDC2	0.0723437	0.0146524	7.92046e-07	0.0550591	protein_coding	TRUE
chr1	ENSG00000121310	cg04310824	rs34588418	ECHDC2	-0.0194849	0.00394824	8.01183e-07	0.359307	protein_coding	TRUE
chr1	ENSG00000121310	cg10554624	rs34588418	ECHDC2	-0.0135165	0.002747	8.63361e-07	0.421554	protein_coding	TRUE
chr1	ENSG00000203666	cg19716264	rs140218267	EFCAB2	-0.0489548	0.00390455	4.63129e-36	0.452365	protein_coding	TRUE
chr1	ENSG00000203666	cg17094624	rs140218267	EFCAB2	-0.018703	0.00288753	9.34727e-11	0.809204	protein_coding	TRUE
chr1	ENSG00000203666	cg06992877	rs140218267	EFCAB2	-0.0208464	0.00338694	7.51102e-10	0.00504802	protein_coding	FALSE
chr1	ENSG00000203666	cg08289927	rs140218267	EFCAB2	0.0193201	0.00341514	1.53863e-08	0.195677	protein_coding	TRUE
chr1	ENSG00000203666	cg05128437	rs7533985	EFCAB2	0.0142365	0.00284829	5.7853e-07	7.03154e-05	protein_coding	FALSE
chr1	ENSG00000070785	cg18845703	rs57139686	EIF2B3	0.230512	0.0438897	1.50391e-07	0.605389	protein_coding	TRUE
chr1	ENSG00000070785	cg15801815	rs57139686	EIF2B3	0.165406	0.0323374	3.13742e-07	0.783638	protein_coding	TRUE
chr1	ENSG00000116299	cg14777056	rs185066128	ELAPOR1	0.353361	0.0670712	1.37586e-07	0.000842912	protein_coding	FALSE
chr1	ENSG00000127463	cg13387374	rs841374	EMC1	-0.0112129	0.00213022	1.41178e-07	0.840866	protein_coding	TRUE
chr1	ENSG00000070886	cg05941864	rs209748	EPHA8	-0.0536578	0.00744949	5.89521e-13	0.152612	protein_coding	TRUE
chr1	ENSG00000070886	cg13795941	rs209748	EPHA8	-0.0352423	0.00514844	7.63506e-12	0.444689	protein_coding	TRUE
chr1	ENSG00000070886	cg27136384	rs209748	EPHA8	0.0255179	0.00386407	4.00489e-11	0.069085	protein_coding	TRUE
chr1	ENSG00000070886	cg11847808	rs209748	EPHA8	-0.0311776	0.00609705	3.16138e-07	0.0237592	protein_coding	FALSE
chr1	ENSG00000268869	cg07925738	rs200136456	ESPNP	1.26721	0.233849	5.9956e-08	0.306989	transcribed_unprocessed_pseudogene	TRUE
chr1	ENSG00000268869	cg09004167	rs1977269	ESPNP	2.30318	0.466233	7.81288e-07	0.196155	transcribed_unprocessed_pseudogene	TRUE
chr1	ENSG00000268869	cg04558298	rs200136456	ESPNP	0.959803	0.195371	8.98153e-07	0.641168	transcribed_unprocessed_pseudogene	TRUE
chr1	ENSG00000117480	cg15580309	rs6674538	FAAH	0.210246	0.0353353	2.68078e-09	0.214203	protein_coding	TRUE
chr1	ENSG00000117480	cg06212760	rs34124738	FAAH	-0.132605	0.0240077	3.324e-08	0.208744	protein_coding	TRUE
chr1	ENSG00000117480	cg04181682	rs34124738	FAAH	0.252872	0.0494643	3.1842e-07	0.136196	protein_coding	TRUE
chr1	ENSG00000162585	cg03732007	rs12082939	FAAP20	0.44198	0.0786613	1.92317e-08	2.96137e-06	protein_coding	FALSE
chr1	ENSG00000162585	cg00656881	rs12082939	FAAP20	-0.734808	0.135801	6.26979e-08	0.000278713	protein_coding	FALSE
chr1	ENSG00000037637	cg20611680	rs35225769	FBXO42	0.0426502	0.00775588	3.81764e-08	0.201862	protein_coding	TRUE
chr1	ENSG00000037637	cg03522107	rs35225769	FBXO42	0.0318476	0.00579737	3.94127e-08	0.496236	protein_coding	TRUE
chr1	ENSG00000037637	cg06365898	rs35225769	FBXO42	-0.0336876	0.00614261	4.15236e-08	0.0293804	protein_coding	FALSE
chr1	ENSG00000037637	cg02987928	rs35225769	FBXO42	0.0428629	0.00782887	4.37573e-08	0.159895	protein_coding	TRUE
chr1	ENSG00000237975	cg23919288	rs7545406	FLG-AS1	0.228797	0.0328244	3.16206e-12	0.266144	lncRNA	TRUE
chr1	ENSG00000237975	cg09127314	rs7545406	FLG-AS1	-0.30229	0.0464943	7.9439e-11	0.030298	lncRNA	FALSE
chr1	ENSG00000237975	cg24529535	rs34372395	FLG-AS1	0.233406	0.0375583	5.14902e-10	0.0883096	lncRNA	TRUE
chr1	ENSG00000237975	cg15025200	rs61814946	FLG-AS1	-0.21767	0.0350429	5.24688e-10	0.6477	lncRNA	TRUE
chr1	ENSG00000237975	cg24914149	rs7545406	FLG-AS1	0.121671	0.0201891	1.67485e-09	0.0524525	lncRNA	TRUE
chr1	ENSG00000237975	cg13498757	rs34372395	FLG-AS1	-0.377104	0.0631819	2.39376e-09	0.22758	lncRNA	TRUE
chr1	ENSG00000237975	cg18273593	rs34372395	FLG-AS1	0.166314	0.0307229	6.18617e-08	0.527037	lncRNA	TRUE
chr1	ENSG00000237975	cg00888758	rs34372395	FLG-AS1	0.194708	0.0364151	8.9476e-08	0.2116	lncRNA	TRUE
chr1	ENSG00000237975	cg22719314	rs34372395	FLG-AS1	0.240789	0.047294	3.55588e-07	0.00868249	lncRNA	FALSE
chr1	ENSG00000179743	cg16109817	rs145975262	FLJ37453	0.988354	0.192334	2.76582e-07	0.0617521	lncRNA	TRUE
chr1	ENSG00000162769	cg12596505	rs11120064	FLVCR1	0.0569563	0.00980026	6.18348e-09	0.0158134	protein_coding	FALSE
chr1	ENSG00000162769	cg15130102	rs56250244	FLVCR1	0.0616121	0.0124101	6.88113e-07	0.234076	protein_coding	TRUE
chr1	ENSG00000198468	cg12596505	rs1874417	FLVCR1-DT	-0.0858437	0.0116298	1.56714e-13	0.000555632	lncRNA	FALSE
chr1	ENSG00000198468	cg04607844	rs1874417	FLVCR1-DT	-0.0743866	0.0118263	3.17585e-10	0.00510986	lncRNA	FALSE
chr1	ENSG00000094963	cg09629866	rs145126383	FMO2	-0.495689	0.0964152	2.72997e-07	0.230552	protein_coding	TRUE
chr1	ENSG00000254685	cg21446242	rs567060	FPGT	-0.125854	0.0222876	1.6344e-08	0.128893	protein_coding	TRUE
chr1	ENSG00000254685	cg03837750	rs567060	FPGT	-0.120113	0.0241952	6.89412e-07	0.92102	protein_coding	TRUE
chr1	ENSG00000259030	cg21446242	rs12043976	FPGT-TNNI3K	-0.106342	0.0199056	9.17652e-08	0.227897	protein_coding	TRUE
chr1	ENSG00000179163	cg12084952	rs140967752	FUCA1	0.859742	0.159006	6.40999e-08	0.276847	protein_coding	TRUE
chr1	ENSG00000179163	cg22077361	rs140967752	FUCA1	0.755663	0.142607	1.16495e-07	0.0272525	protein_coding	FALSE
chr1	ENSG00000179163	cg22614927	rs140967752	FUCA1	0.305433	0.0620046	8.39401e-07	0.810999	protein_coding	TRUE
chr1	ENSG00000162654	cg11309454	rs665123	GBP4	0.154423	0.0309604	6.10799e-07	0.314701	protein_coding	TRUE
chr1	ENSG00000169224	cg21399703	rs35464493	GCSAML	-1.92645	0.319369	1.61874e-09	0.105478	protein_coding	TRUE
chr1	ENSG00000169224	cg18198730	rs35464493	GCSAML	-1.16474	0.197579	3.7462e-09	0.326368	protein_coding	TRUE
chr1	ENSG00000169224	cg20771596	rs35464493	GCSAML	-1.75936	0.303843	7.02381e-09	0.748775	protein_coding	TRUE
chr1	ENSG00000169224	cg22374474	rs35464493	GCSAML	-0.760657	0.134261	1.466e-08	0.689166	protein_coding	TRUE
chr1	ENSG00000169224	cg02713706	rs35464493	GCSAML	-1.63375	0.28886	1.55067e-08	0.631788	protein_coding	TRUE
chr1	ENSG00000169224	cg11166453	rs35464493	GCSAML	-1.17287	0.207539	1.59227e-08	0.47924	protein_coding	TRUE
chr1	ENSG00000169224	cg26060667	rs35464493	GCSAML	-0.826611	0.149039	2.9182e-08	0.301922	protein_coding	TRUE
chr1	ENSG00000169224	cg05639522	rs35464493	GCSAML	-0.906434	0.163833	3.15411e-08	0.826375	protein_coding	TRUE
chr1	ENSG00000169224	cg07313626	rs35464493	GCSAML	-0.703374	0.137543	3.15671e-07	0.574963	protein_coding	TRUE
chr1	ENSG00000116906	cg00022642	rs532163	GNPAT	-0.0659338	0.0115014	9.88558e-09	0.582601	protein_coding	TRUE
chr1	ENSG00000143457	cg09365446	rs34813433	GOLPH3L	-0.338032	0.0534006	2.44991e-10	0.306395	protein_coding	TRUE
chr1	ENSG00000143457	cg04414720	rs34813433	GOLPH3L	-0.424826	0.0682003	4.69141e-10	0.305411	protein_coding	TRUE
chr1	ENSG00000143457	cg10589385	rs34813433	GOLPH3L	-0.260452	0.0520217	5.53983e-07	0.133015	protein_coding	TRUE
chr1	ENSG00000116157	cg06612871	rs11810754	GPX7	1.91156	0.359914	1.08931e-07	0.395827	protein_coding	TRUE
chr1	ENSG00000134184	cg24506221	rs36209093	GSTM1	-0.138014	0.0192967	8.53894e-13	0.0979662	protein_coding	TRUE
chr1	ENSG00000134202	cg04545003	rs4970777	GSTM3	-0.0285972	0.00263372	1.82456e-27	0.0135562	protein_coding	FALSE
chr1	ENSG00000134202	cg10807101	rs4970777	GSTM3	-0.0291742	0.00278254	1.01502e-25	0.0183602	protein_coding	FALSE
chr1	ENSG00000134202	cg00297950	rs4970777	GSTM3	-0.0676565	0.00758344	4.59571e-19	0.0606455	protein_coding	TRUE
chr1	ENSG00000134202	cg15967012	rs4970777	GSTM3	0.0147476	0.00179249	1.91222e-16	0.0541787	protein_coding	TRUE
chr1	ENSG00000134202	cg23645476	rs4970777	GSTM3	-0.0585394	0.00735962	1.80389e-15	0.136916	protein_coding	TRUE
chr1	ENSG00000134202	cg02880629	rs4970777	GSTM3	-0.0153833	0.00200798	1.84371e-14	0.0774669	protein_coding	TRUE
chr1	ENSG00000134202	cg08525331	rs4970777	GSTM3	-0.0165208	0.00225789	2.53727e-13	0.147087	protein_coding	TRUE
chr1	ENSG00000134202	cg25210835	rs4970777	GSTM3	0.0199347	0.00309106	1.12477e-10	0.00348543	protein_coding	FALSE
chr1	ENSG00000134202	cg04903060	rs4970777	GSTM3	0.00963057	0.0015267	2.82465e-10	0.196299	protein_coding	TRUE
chr1	ENSG00000134202	cg24467349	rs4970777	GSTM3	0.0185195	0.00302293	8.99119e-10	0.00270654	protein_coding	FALSE
chr1	ENSG00000134202	cg25027501	rs4970777	GSTM3	-0.0106627	0.00208046	2.97259e-07	0.897075	protein_coding	TRUE
chr1	ENSG00000168765	cg05951137	rs865774	GSTM4	-0.141599	0.0287835	8.67885e-07	0.929474	protein_coding	TRUE
chr1	ENSG00000134201	cg24467349	rs28743105	GSTM5	-0.0505942	0.00612928	1.52539e-16	0.0221984	protein_coding	FALSE
chr1	ENSG00000134201	cg25210835	rs28743105	GSTM5	-0.0505849	0.00634698	1.58782e-15	0.0136129	protein_coding	FALSE
chr1	ENSG00000134201	cg04545003	rs28743105	GSTM5	0.0326655	0.00635844	2.78652e-07	6.46888e-05	protein_coding	FALSE
chr1	ENSG00000134201	cg02880629	rs11101996	GSTM5	0.0273435	0.00532341	2.79956e-07	0.00365588	protein_coding	FALSE
chr1	ENSG00000134201	cg10807101	rs28743105	GSTM5	0.0338097	0.00665243	3.72875e-07	0.000337266	protein_coding	FALSE
chr1	ENSG00000049239	cg09122657	rs9435144	H6PD	-0.0568457	0.00761526	8.34844e-14	0.750534	protein_coding	TRUE
chr1	ENSG00000049239	cg23914842	rs9435144	H6PD	0.0874803	0.0128913	1.15268e-11	0.0440166	protein_coding	FALSE
chr1	ENSG00000049239	cg23913482	rs9435144	H6PD	-0.0398165	0.00713778	2.42925e-08	0.78297	protein_coding	TRUE
chr1	ENSG00000162669	cg27594756	rs17131429	HFM1	0.0961226	0.0124668	1.25528e-14	0.165623	protein_coding	TRUE
chr1	ENSG00000162669	cg10890233	rs17131429	HFM1	0.0790239	0.0125036	2.61369e-10	0.0816259	protein_coding	TRUE
chr1	ENSG00000162669	cg09737265	rs17131429	HFM1	-0.0668578	0.0107583	5.14758e-10	0.650853	protein_coding	TRUE
chr1	ENSG00000162669	cg20029923	rs281934	HFM1	-0.115703	0.0202365	1.08068e-08	0.0795013	protein_coding	TRUE
chr1	ENSG00000162669	cg12456433	rs281934	HFM1	-0.153666	0.0292326	1.46705e-07	0.0711317	protein_coding	TRUE
chr1	ENSG00000162669	cg09077757	rs17131429	HFM1	-0.0795177	0.0161559	8.57079e-07	0.138298	protein_coding	TRUE
chr1	ENSG00000181873	cg13294652	rs10753445	IBA57	-0.571346	0.0871684	5.58234e-11	0.306271	protein_coding	TRUE
chr1	ENSG00000181873	cg24846680	rs10753445	IBA57	0.215378	0.0371546	6.75918e-09	0.704144	protein_coding	TRUE
chr1	ENSG00000185436	cg08700651	rs12094257	IFNLR1	-0.161744	0.0329333	9.04921e-07	0.778235	protein_coding	TRUE
chr1	ENSG00000117154	cg11232944	rs12759956	IGSF21	0.136842	0.0197711	4.47502e-12	0.165346	protein_coding	TRUE
chr1	ENSG00000117154	cg09390181	rs12759956	IGSF21	0.0793867	0.0154102	2.58315e-07	0.136892	protein_coding	TRUE
chr1	ENSG00000117154	cg06163573	rs12759956	IGSF21	-0.0645082	0.0126582	3.46601e-07	0.149003	protein_coding	TRUE
chr1	ENSG00000204084	cg01967642	rs528464	INPP5B	-0.0326136	0.00611762	9.7624e-08	0.193324	protein_coding	TRUE
chr1	ENSG00000197429	cg26899948	rs6703960	IPP	-0.233409	0.0245313	1.8215e-21	0.754644	protein_coding	TRUE
chr1	ENSG00000197429	cg24296786	rs6703960	IPP	0.0906647	0.0153949	3.87909e-09	0.0178504	protein_coding	FALSE
chr1	ENSG00000197429	cg03146154	rs6703960	IPP	-0.0792025	0.0139242	1.28443e-08	0.000331638	protein_coding	FALSE
chr1	ENSG00000197429	cg04181682	rs6703960	IPP	0.231466	0.0443654	1.81592e-07	8.67549e-05	protein_coding	FALSE
chr1	ENSG00000197429	cg06784218	rs11211176	IPP	-0.0805678	0.0161781	6.3569e-07	0.0506157	protein_coding	TRUE
chr1	ENSG00000117595	cg04352962	rs2357229	IRF6	-0.174738	0.0255966	8.69604e-12	0.128917	protein_coding	TRUE
chr1	ENSG00000117595	cg23283495	rs764093	IRF6	-0.115729	0.0182557	2.30735e-10	0.414423	protein_coding	TRUE
chr1	ENSG00000117595	cg14423246	rs764093	IRF6	0.134502	0.021712	5.83589e-10	0.113245	protein_coding	TRUE
chr1	ENSG00000117595	cg25204440	rs2357229	IRF6	-0.169586	0.0280818	1.55069e-09	0.365546	protein_coding	TRUE
chr1	ENSG00000117595	cg21951975	rs2357229	IRF6	-0.134165	0.0225713	2.78029e-09	0.0010101	protein_coding	FALSE
chr1	ENSG00000117595	cg22338127	rs2357229	IRF6	-0.25361	0.0489217	2.17185e-07	0.312786	protein_coding	TRUE
chr1	ENSG00000117595	cg22029157	rs764093	IRF6	-0.126164	0.024572	2.82954e-07	0.20639	protein_coding	TRUE
chr1	ENSG00000117595	cg25192855	rs2357229	IRF6	-0.076727	0.0152564	4.92594e-07	0.260456	protein_coding	TRUE
chr1	ENSG00000117595	cg12034118	rs2357229	IRF6	-0.194367	0.0386734	5.01183e-07	0.0840541	protein_coding	TRUE
chr1	ENSG00000117595	cg06929287	rs2357229	IRF6	0.0740036	0.0148426	6.16803e-07	0.0423501	protein_coding	FALSE
chr1	ENSG00000142856	cg05210526	rs11347600	ITGB3BP	-0.185771	0.0350491	1.15614e-07	0.00275749	protein_coding	FALSE
chr1	ENSG00000142856	cg18759728	rs2143834	ITGB3BP	-0.130234	0.02538	2.87616e-07	0.364225	protein_coding	TRUE
chr1	ENSG00000142856	cg03373115	rs11347600	ITGB3BP	-0.273903	0.0550691	6.56491e-07	0.0055992	protein_coding	FALSE
chr1	ENSG00000142856	cg26449961	rs2143834	ITGB3BP	-0.149673	0.0301702	7.01516e-07	0.633507	protein_coding	TRUE
chr1	ENSG00000142856	cg00270148	rs855317	ITGB3BP	0.136802	0.0276714	7.66205e-07	0.107091	protein_coding	TRUE
chr1	ENSG00000236200	cg12619880	rs114347687	KDM4A-AS1	0.215789	0.026447	3.3695e-16	0.000232336	lncRNA	FALSE
chr1	ENSG00000236200	cg08959526	rs114347687	KDM4A-AS1	-0.193678	0.0246207	3.64723e-15	0.00391697	lncRNA	FALSE
chr1	ENSG00000236200	cg23848055	rs114347687	KDM4A-AS1	-0.195364	0.0293546	2.82677e-11	0.00104093	lncRNA	FALSE
chr1	ENSG00000236200	cg11958827	rs114347687	KDM4A-AS1	-0.139637	0.0211683	4.20906e-11	0.0207941	lncRNA	FALSE
chr1	ENSG00000236200	cg23028072	rs114347687	KDM4A-AS1	-0.1391	0.0221726	3.53058e-10	0.000334611	lncRNA	FALSE
chr1	ENSG00000236200	cg25041176	rs114347687	KDM4A-AS1	-0.138466	0.0240915	9.05787e-09	0.016405	lncRNA	FALSE
chr1	ENSG00000236200	cg05180596	rs114347687	KDM4A-AS1	-0.121815	0.0218097	2.33211e-08	0.0164907	lncRNA	FALSE
chr1	ENSG00000236200	cg23930257	rs114347687	KDM4A-AS1	-0.0909964	0.0165455	3.80257e-08	0.00722729	lncRNA	FALSE
chr1	ENSG00000236200	cg27033754	rs114347687	KDM4A-AS1	0.132109	0.0244823	6.80928e-08	0.00381255	lncRNA	FALSE
chr1	ENSG00000236200	cg16047291	rs114347687	KDM4A-AS1	-0.149988	0.0278651	7.3396e-08	0.0537481	lncRNA	TRUE
chr1	ENSG00000236200	cg18880737	rs114347687	KDM4A-AS1	-0.100552	0.0193511	2.03428e-07	0.00977627	lncRNA	FALSE
chr1	ENSG00000224699	cg15365029	rs11102100	LAMTOR5-AS1	-1.96937	0.382264	2.57909e-07	0.230992	lncRNA	TRUE
chr1	ENSG00000224699	cg20982476	rs11102100	LAMTOR5-AS1	-0.849846	0.17302	9.02306e-07	0.716689	lncRNA	TRUE
chr1	ENSG00000116678	cg03607891	rs9436746	LEPR	0.0421716	0.0081028	1.94444e-07	0.127516	protein_coding	TRUE
chr1	ENSG00000213625	cg14976592	rs10493377	LEPROT	0.207264	0.0321992	1.21911e-10	0.567556	protein_coding	TRUE
chr1	ENSG00000213625	cg16413020	rs10493377	LEPROT	0.117841	0.020598	1.05903e-08	0.594718	protein_coding	TRUE
chr1	ENSG00000218510	cg21388327	rs2501290	LINC00339	-0.220436	0.043465	3.94564e-07	0.200293	lncRNA	TRUE
chr1	ENSG00000227953	cg15390314	rs6693422	LINC01341	-0.359054	0.0581011	6.41729e-10	0.00845215	lncRNA	FALSE
chr1	ENSG00000227953	cg22475246	rs3795463	LINC01341	-0.124861	0.0244798	3.38595e-07	0.152308	lncRNA	TRUE
chr1	ENSG00000231768	cg10714509	rs271738	LINC01354	-0.520024	0.0850599	9.7397e-10	0.579429	lncRNA	TRUE
chr1	ENSG00000231768	cg05990710	rs271738	LINC01354	-0.404313	0.0683428	3.29949e-09	0.297895	lncRNA	TRUE
chr1	ENSG00000226029	cg07925738	rs12093260	LINC01772	-1.18972	0.208737	1.20073e-08	0.0434433	lncRNA	FALSE
chr1	ENSG00000213171	cg08566367	rs4845587	LINGO4	-0.48851	0.080822	1.50085e-09	0.255958	protein_coding	TRUE
chr1	ENSG00000213171	cg24545100	rs4845587	LINGO4	-0.501525	0.0911204	3.71297e-08	0.284119	protein_coding	TRUE
chr1	ENSG00000162620	cg21446242	rs533371	LRRIQ3	-0.22721	0.0239035	1.99492e-21	0.332387	protein_coding	TRUE
chr1	ENSG00000162620	cg03837750	rs533371	LRRIQ3	-0.189417	0.0293795	1.13891e-10	0.809291	protein_coding	TRUE
chr1	ENSG00000162620	cg23752735	rs533371	LRRIQ3	-0.145381	0.0232672	4.14857e-10	0.988002	protein_coding	TRUE
chr1	ENSG00000162620	cg13900770	rs533371	LRRIQ3	-0.32322	0.0576149	2.02313e-08	0.857099	protein_coding	TRUE
chr1	ENSG00000162620	cg23364470	rs533371	LRRIQ3	-0.141868	0.0262089	6.1988e-08	0.863783	protein_coding	TRUE
chr1	ENSG00000162620	cg16356856	rs533371	LRRIQ3	-0.285567	0.0534852	9.33681e-08	0.581999	protein_coding	TRUE
chr1	ENSG00000204178	cg03362483	rs34293609	MACO1	0.15666	0.0316632	7.50939e-07	0.621177	protein_coding	TRUE
chr1	ENSG00000204178	cg21826606	rs34293609	MACO1	0.704861	0.142612	7.71316e-07	0.511317	protein_coding	TRUE
chr1	ENSG00000143194	cg23659062	rs67780847	MAEL	0.189667	0.0365132	2.05291e-07	0.0820161	protein_coding	TRUE
chr1	ENSG00000143194	cg00109164	rs7551881	MAEL	-0.164129	0.0320043	2.92294e-07	0.000205034	protein_coding	FALSE
chr1	ENSG00000185090	cg12548638	rs72661817	MANEAL	0.172149	0.0347114	7.06943e-07	0.0628722	protein_coding	TRUE
chr1	ENSG00000163875	cg12696750	rs7534923	MEAF6	0.180529	0.0287204	3.26268e-10	0.0295418	protein_coding	FALSE
chr1	ENSG00000163875	cg17933807	rs7534923	MEAF6	0.259591	0.0453856	1.06727e-08	0.415108	protein_coding	TRUE
chr1	ENSG00000171806	cg26204283	rs12132222	METTL18	-0.282048	0.0402302	2.36872e-12	0.384014	protein_coding	TRUE
chr1	ENSG00000171806	cg15378869	rs12132222	METTL18	-0.105731	0.0182729	7.19851e-09	0.344235	protein_coding	TRUE
chr1	ENSG00000174514	cg12481266	rs11240530	MFSD4A	-0.0527424	0.00837577	3.03421e-10	0.138057	protein_coding	TRUE
chr1	ENSG00000174514	cg00855731	rs11240530	MFSD4A	-0.0785965	0.0134407	4.98565e-09	0.139764	protein_coding	TRUE
chr1	ENSG00000184774	cg20677516	rs4950923	MGAT4EP	-0.205249	0.0383821	8.91745e-08	0.0997516	transcribed_unitary_pseudogene	TRUE
chr1	ENSG00000143198	cg08510884	rs4147592	MGST3	-0.0611698	0.00811757	4.86533e-14	0.407149	protein_coding	TRUE
chr1	ENSG00000143198	cg21165486	rs4147592	MGST3	-0.0300514	0.00579242	2.125e-07	0.254313	protein_coding	TRUE
chr1	ENSG00000132763	cg03123370	rs6688516	MMACHC	0.665785	0.113316	4.2163e-09	0.75916	protein_coding	TRUE
chr1	ENSG00000132763	cg11803389	rs6688516	MMACHC	-0.433311	0.0797719	5.57663e-08	0.946184	protein_coding	TRUE
chr1	ENSG00000132763	cg26899948	rs6688516	MMACHC	0.523724	0.106635	9.04535e-07	0.0106643	protein_coding	FALSE
chr1	ENSG00000242485	cg18546249	rs34442823	MRPL20	0.150978	0.023519	1.36821e-10	0.247076	protein_coding	TRUE
chr1	ENSG00000242485	cg05397857	rs34442823	MRPL20	0.151088	0.0254658	2.97476e-09	0.422399	protein_coding	TRUE
chr1	ENSG00000242485	cg02416993	rs34442823	MRPL20	-0.146338	0.0257591	1.33882e-08	0.61785	protein_coding	TRUE
chr1	ENSG00000242485	cg20411340	rs34442823	MRPL20	-0.146744	0.0290639	4.44059e-07	0.0864591	protein_coding	TRUE
chr1	ENSG00000242485	cg09331144	rs34442823	MRPL20	-0.196696	0.0397498	7.48435e-07	0.0916639	protein_coding	TRUE
chr1	ENSG00000162910	cg13294652	rs849749	MRPL55	-0.866181	0.163959	1.27142e-07	0.339642	protein_coding	TRUE
chr1	ENSG00000162910	cg01200585	rs849749	MRPL55	0.800631	0.15706	3.43953e-07	0.227159	protein_coding	TRUE
chr1	ENSG00000266472	cg08130307	rs13374465	MRPS21	-0.1034	0.014866	3.51337e-12	0.0864925	protein_coding	TRUE
chr1	ENSG00000266472	cg25066665	rs200698569	MRPS21	-0.126145	0.0238915	1.29238e-07	0.344356	protein_coding	TRUE
chr1	ENSG00000057468	cg22875332	rs4949686	MSH4	1.32605	0.250687	1.22534e-07	0.259319	protein_coding	TRUE
chr1	ENSG00000186301	cg07925738	rs10492988	MST1P2	-0.928536	0.181954	3.34069e-07	0.259778	unprocessed_pseudogene	TRUE
chr1	ENSG00000125459	cg16859077	rs6665227	MSTO1	0.732653	0.145697	4.94074e-07	0.527334	protein_coding	TRUE
chr1	ENSG00000237973	cg17968925	rs141958931	MTCO1P12	-0.0164473	0.003195	2.63513e-07		unprocessed_pseudogene	FALSE
chr1	ENSG00000117640	cg24596570	rs2294226	MTFR1L	-0.0391982	0.00495561	2.5766e-15	0.912905	protein_coding	TRUE
chr1	ENSG00000117640	cg05887270	rs11247764	MTFR1L	0.0300506	0.00541774	2.9111e-08	0.802881	protein_coding	TRUE
chr1	ENSG00000117640	cg22189070	rs11247764	MTFR1L	0.0346921	0.00651091	9.91321e-08	0.000733503	protein_coding	FALSE
chr1	ENSG00000177000	cg14353677	rs1476413	MTHFR	-0.0720501	0.0125126	8.50075e-09	0.590634	protein_coding	TRUE
chr1	ENSG00000177000	cg06770735	rs1476413	MTHFR	-0.06338	0.0127159	6.21802e-07	0.149361	protein_coding	TRUE
chr1	ENSG00000163382	cg01561528	rs4661188	NAXE	0.151165	0.0219809	6.10862e-12	0.864148	protein_coding	TRUE
chr1	ENSG00000163382	cg00735267	rs4661188	NAXE	0.131682	0.0193778	1.07908e-11	0.642519	protein_coding	TRUE
chr1	ENSG00000163382	cg24268531	rs4661188	NAXE	0.22059	0.0332173	3.11977e-11	0.832815	protein_coding	TRUE
chr1	ENSG00000163382	cg01612182	rs4661188	NAXE	0.143855	0.0223388	1.197e-10	0.90892	protein_coding	TRUE
chr1	ENSG00000163382	cg12567310	rs4661188	NAXE	0.317321	0.0608445	1.83536e-07	0.744418	protein_coding	TRUE
chr1	ENSG00000263956	cg13502125	rs1875836	NBPF11	0.0965362	0.0161108	2.07257e-09	0.103758	protein_coding	TRUE
chr1	ENSG00000263956	cg21919968	rs1875836	NBPF11	0.047206	0.00801736	3.90964e-09	0.0891258	protein_coding	TRUE
chr1	ENSG00000263956	cg17476910	rs1875836	NBPF11	0.115332	0.0198761	6.53183e-09	0.0235287	protein_coding	FALSE
chr1	ENSG00000263956	cg12099459	rs1875836	NBPF11	0.0848139	0.0158004	7.96847e-08	0.10691	protein_coding	TRUE
chr1	ENSG00000066136	cg15920552	rs6667368	NFYC	0.146772	0.024495	2.07393e-09	0.689802	protein_coding	TRUE
chr1	ENSG00000272145	cg15920552	rs2744798	NFYC-AS1	-0.338077	0.0596819	1.47323e-08	0.359897	lncRNA	TRUE
chr1	ENSG00000001461	cg00917251	rs195730	NIPAL3	-0.0564067	0.00980762	8.85488e-09	0.0627432	protein_coding	TRUE
chr1	ENSG00000001461	cg08518475	rs195730	NIPAL3	-0.058671	0.0110445	1.08294e-07	0.066557	protein_coding	TRUE
chr1	ENSG00000117481	cg15580309	rs5013325	NSUN4	0.133899	0.0189254	1.49332e-12	0.290948	protein_coding	TRUE
chr1	ENSG00000117481	cg13488501	rs11589531	NSUN4	0.172431	0.03262	1.24985e-07		protein_coding	FALSE
chr1	ENSG00000117481	cg04181682	rs5013325	NSUN4	0.205793	0.0394939	1.88085e-07	0.0219902	protein_coding	FALSE
chr1	ENSG00000117481	cg12978857	rs5013325	NSUN4	0.102173	0.0206692	7.68391e-07	0.0479716	protein_coding	FALSE
chr1	ENSG00000143552	cg08545598	rs202241204	NUP210L	0.621926	0.0985287	2.7522e-10	0.0894826	protein_coding	TRUE
chr1	ENSG00000143552	cg05139571	rs41305088	NUP210L	-0.698558	0.114898	1.20341e-09	0.686279	protein_coding	TRUE
chr1	ENSG00000143552	cg13328788	rs41305088	NUP210L	-0.778744	0.138711	1.97527e-08	0.384187	protein_coding	TRUE
chr1	ENSG00000143552	cg00006626	rs41305088	NUP210L	-0.574665	0.102672	2.17971e-08	0.742661	protein_coding	TRUE
chr1	ENSG00000143552	cg03352427	rs41305088	NUP210L	-0.471377	0.0843468	2.2896e-08	0.434531	protein_coding	TRUE
chr1	ENSG00000143552	cg19757176	rs41305088	NUP210L	-0.376957	0.0674757	2.31613e-08	0.229827	protein_coding	TRUE
chr1	ENSG00000143552	cg16274678	rs41305088	NUP210L	-0.388402	0.0737159	1.37239e-07	0.0314017	protein_coding	FALSE
chr1	ENSG00000143552	cg17167920	rs41305088	NUP210L	-0.526272	0.100353	1.56933e-07	0.716335	protein_coding	TRUE
chr1	ENSG00000154358	cg13294652	rs10565504	OBSCN	0.247247	0.0361207	7.6461e-12	0.239309	protein_coding	TRUE
chr1	ENSG00000154358	cg01200585	rs10565504	OBSCN	-0.223178	0.0349279	1.6625e-10	0.233602	protein_coding	TRUE
chr1	ENSG00000154358	cg24846680	rs10565504	OBSCN	-0.08882	0.0152489	5.72195e-09	0.588809	protein_coding	TRUE
chr1	ENSG00000154358	cg06786773	rs10565504	OBSCN	0.0645035	0.0122815	1.50387e-07	0.32649	protein_coding	TRUE
chr1	ENSG00000154358	cg01557798	rs10565504	OBSCN	0.0579759	0.0116732	6.81379e-07	0.637932	protein_coding	TRUE
chr1	ENSG00000162913	cg13294652	rs1832734	OBSCN-AS1	-1.02343	0.165253	5.89851e-10	0.334868	lncRNA	TRUE
chr1	ENSG00000162913	cg01200585	rs1832734	OBSCN-AS1	0.986737	0.163734	1.67596e-09	0.675061	lncRNA	TRUE
chr1	ENSG00000162913	cg24846680	rs1832734	OBSCN-AS1	0.383798	0.0706202	5.48942e-08	0.652322	lncRNA	TRUE
chr1	ENSG00000162913	cg06786773	rs1832734	OBSCN-AS1	-0.292197	0.0574359	3.63078e-07	0.475956	lncRNA	TRUE
chr1	ENSG00000196071	cg09506600	rs6701018	OR2L13	-0.549691	0.0794566	4.57653e-12	0.68549	protein_coding	TRUE
chr1	ENSG00000196071	cg08861456	rs6701018	OR2L13	-0.316361	0.0498831	2.26734e-10	0.505937	protein_coding	TRUE
chr1	ENSG00000196071	cg08944170	rs6701018	OR2L13	-0.805069	0.132091	1.09563e-09	0.812578	protein_coding	TRUE
chr1	ENSG00000196071	cg03748376	rs6701018	OR2L13	-0.813561	0.134788	1.58135e-09	0.867847	protein_coding	TRUE
chr1	ENSG00000196071	cg20507276	rs6701018	OR2L13	-0.659585	0.109384	1.63966e-09	0.882827	protein_coding	TRUE
chr1	ENSG00000196071	cg20433858	rs6701018	OR2L13	-0.444325	0.0755151	4.00652e-09	0.641418	protein_coding	TRUE
chr1	ENSG00000196071	cg25983401	rs6701018	OR2L13	0.350724	0.0600992	5.35492e-09	0.582686	protein_coding	TRUE
chr1	ENSG00000196071	cg00785941	rs6701018	OR2L13	-0.559116	0.0976861	1.04291e-08	0.741206	protein_coding	TRUE
chr1	ENSG00000196071	cg08130084	rs6701018	OR2L13	0.292115	0.0511194	1.10107e-08	0.692434	protein_coding	TRUE
chr1	ENSG00000196071	cg10886419	rs6701018	OR2L13	0.23321	0.041507	1.92542e-08	0.544119	protein_coding	TRUE
chr1	ENSG00000196071	cg27483432	rs6701018	OR2L13	0.342823	0.0650874	1.38582e-07	0.334017	protein_coding	TRUE
chr1	ENSG00000196071	cg10580513	rs6701018	OR2L13	0.211662	0.0405776	1.82607e-07	0.793384	protein_coding	TRUE
chr1	ENSG00000196071	cg23028721	rs6701018	OR2L13	0.181671	0.0348503	1.859e-07	0.414953	protein_coding	TRUE
chr1	ENSG00000196071	cg16717532	rs6701018	OR2L13	0.233371	0.044971	2.11e-07	0.175633	protein_coding	TRUE
chr1	ENSG00000203663	cg09506600	rs6701018	OR2L2	-3.60046	0.668752	7.29105e-08	0.724184	protein_coding	TRUE
chr1	ENSG00000203663	cg08861456	rs6701018	OR2L2	-2.07215	0.406416	3.42176e-07	0.687001	protein_coding	TRUE
chr1	ENSG00000203663	cg08944170	rs6701018	OR2L2	-5.27318	1.06154	6.78363e-07	0.794144	protein_coding	TRUE
chr1	ENSG00000203663	cg03748376	rs6701018	OR2L2	-5.3288	1.07972	7.99975e-07	0.92005	protein_coding	TRUE
chr1	ENSG00000203663	cg20507276	rs6701018	OR2L2	-4.32026	0.875934	8.13195e-07	0.814539	protein_coding	TRUE
chr1	ENSG00000116885	cg20948151	rs6662907	OSCP1	-0.286414	0.0500245	1.03147e-08	0.577924	protein_coding	TRUE
chr1	ENSG00000117115	cg27529520	rs2746482	PADI2	-0.0147697	0.00166069	5.91054e-19	0.593905	protein_coding	TRUE
chr1	ENSG00000117115	cg06004306	rs2746482	PADI2	-0.012366	0.00145883	2.31722e-17	0.233412	protein_coding	TRUE
chr1	ENSG00000117115	cg16835277	rs2746482	PADI2	-0.00732496	0.00101166	4.46837e-13	0.386141	protein_coding	TRUE
chr1	ENSG00000117115	cg00597915	rs2746482	PADI2	-0.0107705	0.00149301	5.43678e-13	0.336788	protein_coding	TRUE
chr1	ENSG00000117115	cg15590113	rs2746482	PADI2	-0.00487964	0.00074082	4.49375e-11	0.21042	protein_coding	TRUE
chr1	ENSG00000117115	cg00569276	rs2746482	PADI2	-0.00895497	0.00139497	1.36735e-10	0.762955	protein_coding	TRUE
chr1	ENSG00000117115	cg18879300	rs2746482	PADI2	-0.00463006	0.000801036	7.46639e-09	0.488241	protein_coding	TRUE
chr1	ENSG00000117115	cg10233913	rs2746482	PADI2	-0.00610345	0.00118606	2.66139e-07	0.760562	protein_coding	TRUE
chr1	ENSG00000117115	cg06900068	rs2746482	PADI2	-0.00440675	0.000874543	4.68165e-07	0.867634	protein_coding	TRUE
chr1	ENSG00000158006	cg05674944	rs3008244	PAFAH2	0.111681	0.0191	4.99972e-09	0.00756682	protein_coding	FALSE
chr1	ENSG00000158006	cg02397727	rs3008244	PAFAH2	0.0899709	0.016512	5.07023e-08	0.00632741	protein_coding	FALSE
chr1	ENSG00000099260	cg10424513	rs834984	PALMD	-0.058129	0.0118095	8.55655e-07		protein_coding	FALSE
chr1	ENSG00000160781	cg11078824	rs933489	PAQR6	-0.0538406	0.00822811	6.00977e-11	0.258598	protein_coding	TRUE
chr1	ENSG00000160781	cg01646665	rs933489	PAQR6	0.0394059	0.00761329	2.2678e-07	0.00218796	protein_coding	FALSE
chr1	ENSG00000160781	cg14980620	rs933489	PAQR6	-0.0366034	0.00722156	4.0068e-07	0.938799	protein_coding	TRUE
chr1	ENSG00000116288	cg00845930	rs7517357	PARK7	0.211482	0.0289157	2.59781e-13	0.0254456	protein_coding	FALSE
chr1	ENSG00000116288	cg08027640	rs7517357	PARK7	0.189512	0.0282299	1.90434e-11	0.0734596	protein_coding	TRUE
chr1	ENSG00000116288	cg00042356	rs7517357	PARK7	0.0720168	0.0112093	1.32078e-10	0.0135601	protein_coding	FALSE
chr1	ENSG00000116288	cg26816564	rs7517357	PARK7	0.0555652	0.0110193	4.59354e-07	0.0595825	protein_coding	TRUE
chr1	ENSG00000116288	cg10385390	rs7517357	PARK7	-0.0326906	0.00652794	5.50576e-07	0.842678	protein_coding	TRUE
chr1	ENSG00000228288	cg20677516	rs72442869	PCAT6	-0.12593	0.0176104	8.62388e-13	0.869444	lncRNA	TRUE
chr1	ENSG00000228288	cg10734950	rs72442869	PCAT6	0.138238	0.0229262	1.64268e-09	0.000122418	lncRNA	FALSE
chr1	ENSG00000228288	cg24880665	rs72442869	PCAT6	-0.130538	0.0261233	5.82322e-07	0.557985	lncRNA	TRUE
chr1	ENSG00000180867	cg26010182	rs6593771	PDIA3P1	-0.727479	0.0907835	1.11635e-15	0.0067685	transcribed_processed_pseudogene	FALSE
chr1	ENSG00000142655	cg01834541	rs2506896	PEX14	-0.0977258	0.0102252	1.20863e-21	0.576668	protein_coding	TRUE
chr1	ENSG00000142655	cg23863608	rs2506896	PEX14	-0.0592739	0.00660933	3.01388e-19	0.693452	protein_coding	TRUE
chr1	ENSG00000142655	cg12830684	rs2506896	PEX14	-0.0999572	0.0113855	1.64448e-18	0.814565	protein_coding	TRUE
chr1	ENSG00000142655	cg26362368	rs2506896	PEX14	-0.0958687	0.0110061	3.02569e-18	0.728882	protein_coding	TRUE
chr1	ENSG00000142655	cg23987244	rs2506896	PEX14	-0.0867719	0.0100879	7.86114e-18	0.739785	protein_coding	TRUE
chr1	ENSG00000142655	cg12806121	rs2506896	PEX14	-0.0734506	0.00871515	3.51847e-17	0.910918	protein_coding	TRUE
chr1	ENSG00000142655	cg09319435	rs2506896	PEX14	-0.0461569	0.00553019	7.0404e-17	0.878593	protein_coding	TRUE
chr1	ENSG00000142655	cg04607379	rs2506896	PEX14	-0.0656294	0.00794752	1.48327e-16	0.773863	protein_coding	TRUE
chr1	ENSG00000142655	cg04585221	rs2506896	PEX14	-0.0784188	0.00964716	4.33946e-16	0.85032	protein_coding	TRUE
chr1	ENSG00000142655	cg01849851	rs2506896	PEX14	-0.0944408	0.0119109	2.21017e-15	0.464528	protein_coding	TRUE
chr1	ENSG00000142655	cg24294013	rs2506896	PEX14	-0.0754392	0.00954898	2.78379e-15	0.759664	protein_coding	TRUE
chr1	ENSG00000142655	cg07357157	rs2506896	PEX14	-0.0384331	0.00487672	3.2496e-15	0.474389	protein_coding	TRUE
chr1	ENSG00000142655	cg01063935	rs2506896	PEX14	-0.0671247	0.00852418	3.41776e-15	0.342464	protein_coding	TRUE
chr1	ENSG00000142655	cg15554126	rs2506896	PEX14	-0.0476992	0.00607742	4.20751e-15	0.678788	protein_coding	TRUE
chr1	ENSG00000142655	cg05454781	rs2506896	PEX14	-0.0423388	0.00543605	6.7802e-15	0.491094	protein_coding	TRUE
chr1	ENSG00000142655	cg27571230	rs2506896	PEX14	0.0528832	0.00679131	6.86795e-15	0.243499	protein_coding	TRUE
chr1	ENSG00000142655	cg23975251	rs2506896	PEX14	-0.0731324	0.00953035	1.67202e-14	0.663375	protein_coding	TRUE
chr1	ENSG00000142655	cg15888996	rs2506896	PEX14	0.101781	0.0146195	3.35442e-12	0.00240109	protein_coding	FALSE
chr1	ENSG00000142655	cg12944311	rs2506896	PEX14	-0.0536202	0.00788666	1.05463e-11	0.904497	protein_coding	TRUE
chr1	ENSG00000142655	cg27182133	rs2506896	PEX14	-0.0365801	0.00601736	1.20857e-09	0.714309	protein_coding	TRUE
chr1	ENSG00000142655	cg23072051	rs2506896	PEX14	-0.0293882	0.00533745	3.67022e-08	0.226633	protein_coding	TRUE
chr1	ENSG00000142655	cg07555102	rs2506896	PEX14	-0.0271189	0.00494921	4.26706e-08	0.287478	protein_coding	TRUE
chr1	ENSG00000142655	cg21931713	rs2506896	PEX14	-0.0232426	0.00436457	1.008e-07	0.822473	protein_coding	TRUE
chr1	ENSG00000142655	cg14138827	rs2506896	PEX14	-0.0495853	0.00949655	1.77576e-07	0.00326682	protein_coding	FALSE
chr1	ENSG00000142655	cg17425144	rs2506896	PEX14	-0.0282408	0.00541055	1.79322e-07	0.00101935	protein_coding	FALSE
chr1	ENSG00000142655	cg07384165	rs2506896	PEX14	0.0190712	0.00370121	2.56778e-07	0.00415227	protein_coding	FALSE
chr1	ENSG00000142655	cg23551924	rs2506896	PEX14	0.0234202	0.00455157	2.66785e-07	0.0335417	protein_coding	FALSE
chr1	ENSG00000142655	cg08496872	rs2506896	PEX14	-0.0301648	0.00602011	5.4239e-07	0.00183376	protein_coding	FALSE
chr1	ENSG00000142655	cg16057915	rs2506896	PEX14	-0.0510103	0.0102541	6.5373e-07	0.285249	protein_coding	TRUE
chr1	ENSG00000204138	cg00956142	rs6690915	PHACTR4	-0.129361	0.024625	1.49444e-07	0.882731	protein_coding	TRUE
chr1	ENSG00000135845	cg08587864	rs10752946	PIGC	-0.49228	0.0912506	6.85932e-08	0.504928	protein_coding	TRUE
chr1	ENSG00000117461	cg04181682	rs1416706	PIK3R3	-0.0627142	0.00530034	2.66413e-32	0.86005	protein_coding	TRUE
chr1	ENSG00000117461	cg27584146	rs1416706	PIK3R3	-0.0497465	0.00511807	2.48303e-22	0.608938	protein_coding	TRUE
chr1	ENSG00000117461	cg26011752	rs1416706	PIK3R3	-0.0267338	0.0028759	1.46062e-20	0.753907	protein_coding	TRUE
chr1	ENSG00000117461	cg06974930	rs1416706	PIK3R3	-0.0237072	0.0030383	6.05665e-15	0.24361	protein_coding	TRUE
chr1	ENSG00000117461	cg03146154	rs1416706	PIK3R3	0.0138603	0.00185334	7.51485e-14	0.000382351	protein_coding	FALSE
chr1	ENSG00000117461	cg12978857	rs1416706	PIK3R3	-0.02229	0.00309615	6.05499e-13	0.524555	protein_coding	TRUE
chr1	ENSG00000117461	cg20630926	rs1416706	PIK3R3	-0.0256174	0.0036236	1.55385e-12	0.640038	protein_coding	TRUE
chr1	ENSG00000117461	cg20650505	rs1416706	PIK3R3	-0.014562	0.00227546	1.55795e-10	0.0584194	protein_coding	TRUE
chr1	ENSG00000117461	cg26899948	rs1416706	PIK3R3	0.0214364	0.00345282	5.35343e-10	0.000660994	protein_coding	FALSE
chr1	ENSG00000117461	cg05450708	rs1416706	PIK3R3	0.0191148	0.00315588	1.38774e-09	0.00147735	protein_coding	FALSE
chr1	ENSG00000117461	cg06784218	rs1416706	PIK3R3	0.0110166	0.00206841	1.00338e-07	0.0496927	protein_coding	FALSE
chr1	ENSG00000117461	cg14122995	rs1416706	PIK3R3	-0.0173726	0.00336959	2.52685e-07	0.441602	protein_coding	TRUE
chr1	ENSG00000065243	cg11770675	rs11380483	PKN2	0.128697	0.0214439	1.95441e-09	0.546796	protein_coding	TRUE
chr1	ENSG00000081277	cg19764279	rs57522319	PKP1	-0.0235495	0.00372677	2.63255e-10	0.310785	protein_coding	TRUE
chr1	ENSG00000081277	cg07189167	rs56287879	PKP1	-0.00878547	0.00143642	9.58216e-10	0.743488	protein_coding	TRUE
chr1	ENSG00000081277	cg07302580	rs57522319	PKP1	-0.00709422	0.00125195	1.45706e-08	0.618971	protein_coding	TRUE
chr1	ENSG00000081277	cg26066583	rs56287879	PKP1	-0.00657768	0.00119842	4.05077e-08	0.646278	protein_coding	TRUE
chr1	ENSG00000081277	cg02855983	rs56287879	PKP1	-0.00531133	0.000986726	7.33429e-08	0.954734	protein_coding	TRUE
chr1	ENSG00000081277	cg16819028	rs56287879	PKP1	-0.00785674	0.0014981	1.56734e-07	0.218186	protein_coding	TRUE
chr1	ENSG00000081277	cg12611449	rs56287879	PKP1	-0.00528625	0.00103308	3.10476e-07	0.956296	protein_coding	TRUE
chr1	ENSG00000081277	cg04904030	rs56287879	PKP1	-0.00366354	0.000731434	5.47942e-07	0.929216	protein_coding	TRUE
chr1	ENSG00000081277	cg05184311	rs56287879	PKP1	-0.0037542	0.000751541	5.87338e-07	0.447739	protein_coding	TRUE
chr1	ENSG00000116711	cg25198029	rs61377388	PLA2G4A	1.1151	0.221388	4.7319e-07	0.147305	protein_coding	TRUE
chr1	ENSG00000189266	cg04021497	rs55899369	PNRC2	-0.0645573	0.00913296	1.5649e-12	0.760489	protein_coding	TRUE
chr1	ENSG00000189266	cg27409662	rs55899369	PNRC2	-0.0459692	0.00658175	2.86182e-12	0.621042	protein_coding	TRUE
chr1	ENSG00000189266	cg22358066	rs55899369	PNRC2	-0.0281677	0.00424457	3.21939e-11	0.690403	protein_coding	TRUE
chr1	ENSG00000189266	cg16924704	rs55899369	PNRC2	-0.0454101	0.00693179	5.7156e-11	0.932037	protein_coding	TRUE
chr1	ENSG00000189266	cg03384426	rs55899369	PNRC2	-0.0565184	0.00900273	3.43132e-10	0.842012	protein_coding	TRUE
chr1	ENSG00000189266	cg12569845	rs55899369	PNRC2	-0.0284203	0.00535373	1.10531e-07		protein_coding	FALSE
chr1	ENSG00000143157	cg18267943	rs7548191	POGK	-0.0265904	0.00529087	5.01546e-07	0.515337	protein_coding	TRUE
chr1	ENSG00000143442	cg18801370	rs3072911	POGZ	-0.0350655	0.00552252	2.15951e-10	0.570987	protein_coding	TRUE
chr1	ENSG00000084072	cg24920358	rs12239844	PPIE	0.0791753	0.00725691	1.02872e-27	0.948415	protein_coding	TRUE
chr1	ENSG00000084072	cg07883627	rs12239844	PPIE	0.0486606	0.00463586	8.95889e-26	0.290802	protein_coding	TRUE
chr1	ENSG00000084072	cg02773041	rs12239844	PPIE	0.0345308	0.00433134	1.55733e-15	0.148111	protein_coding	TRUE
chr1	ENSG00000084072	cg17748822	rs60120274	PPIE	-0.0703605	0.0120589	5.38717e-09	0.066689	protein_coding	TRUE
chr1	ENSG00000066027	cg04837461	rs34740542	PPP2R5A	-0.134477	0.0265942	4.26773e-07	0.0530749	protein_coding	TRUE
chr1	ENSG00000131238	cg00695362	rs3131656	PPT1	-0.0348935	0.00538468	9.16345e-11	0.756453	protein_coding	TRUE
chr1	ENSG00000131238	cg08166631	rs3131656	PPT1	0.0305117	0.00606985	4.98825e-07	0.0608407	protein_coding	TRUE
chr1	ENSG00000131791	cg26010182	rs66485043	PRKAB2	-0.136007	0.0180798	5.36915e-14	0.0054025	protein_coding	FALSE
chr1	ENSG00000131791	cg11983977	rs2014107	PRKAB2	0.100077	0.0190077	1.40118e-07	0.953374	protein_coding	TRUE
chr1	ENSG00000198890	cg15468180	rs12401598	PRMT6	-0.303721	0.0328352	2.24746e-20	0.270596	protein_coding	TRUE
chr1	ENSG00000198890	cg02934600	rs12401598	PRMT6	-0.231589	0.0290347	1.50813e-15	0.410375	protein_coding	TRUE
chr1	ENSG00000198890	cg25136326	rs12401598	PRMT6	-0.175553	0.02492	1.85937e-12	0.43588	protein_coding	TRUE
chr1	ENSG00000198890	cg14828511	rs12401598	PRMT6	-0.164991	0.024026	6.54773e-12	0.360649	protein_coding	TRUE
chr1	ENSG00000198890	cg09367891	rs12401598	PRMT6	-0.0606419	0.0107794	1.84751e-08	0.480092	protein_coding	TRUE
chr1	ENSG00000198890	cg07133347	rs12401598	PRMT6	-0.0966346	0.0180066	8.02322e-08	0.771593	protein_coding	TRUE
chr1	ENSG00000230461	cg14810798	rs235924	PROX1-AS1	-0.0571396	0.00864162	3.7881e-11	0.673083	lncRNA	TRUE
chr1	ENSG00000230461	cg24083324	rs235924	PROX1-AS1	0.0448074	0.00869038	2.52307e-07	0.312152	lncRNA	TRUE
chr1	ENSG00000117280	cg07533224	rs823114	RAB29	0.81254	0.141331	8.96701e-09	0.460461	protein_coding	TRUE
chr1	ENSG00000117280	cg11965913	rs823114	RAB29	1.01565	0.178175	1.19584e-08	0.489658	protein_coding	TRUE
chr1	ENSG00000117280	cg12898220	rs823114	RAB29	0.748393	0.131416	1.23489e-08	0.502014	protein_coding	TRUE
chr1	ENSG00000117280	cg07167872	rs823114	RAB29	0.563921	0.0990953	1.2652e-08	0.485767	protein_coding	TRUE
chr1	ENSG00000117280	cg14893161	rs823114	RAB29	0.805839	0.143067	1.7752e-08	0.453075	protein_coding	TRUE
chr1	ENSG00000117280	cg14159672	rs823114	RAB29	0.867084	0.155372	2.39534e-08	0.495569	protein_coding	TRUE
chr1	ENSG00000117280	cg24503407	rs823114	RAB29	0.483228	0.0885045	4.76329e-08	0.479283	protein_coding	TRUE
chr1	ENSG00000117280	cg05841700	rs823114	RAB29	0.652312	0.119694	5.04144e-08	0.42764	protein_coding	TRUE
chr1	ENSG00000117280	cg16334093	rs823114	RAB29	0.33589	0.0623248	7.07129e-08	0.372468	protein_coding	TRUE
chr1	ENSG00000117280	cg03827427	rs823114	RAB29	-0.198319	0.0376891	1.42524e-07	0.310184	protein_coding	TRUE
chr1	ENSG00000117280	cg07157834	rs823114	RAB29	0.228932	0.0451764	4.03042e-07	0.257137	protein_coding	TRUE
chr1	ENSG00000117602	cg00917251	rs195709	RCAN3	-0.0340308	0.00329361	5.03143e-25	0.284043	protein_coding	TRUE
chr1	ENSG00000117602	cg08518475	rs195709	RCAN3	-0.0396983	0.00388515	1.64743e-24	0.8482	protein_coding	TRUE
chr1	ENSG00000198570	cg10512769	rs11579048	RD3	-0.0584073	0.010508	2.72334e-08	0.546728	protein_coding	TRUE
chr1	ENSG00000198570	cg00658007	rs11579048	RD3	-0.0396672	0.00764455	2.11484e-07	0.482165	protein_coding	TRUE
chr1	ENSG00000198570	cg06753273	rs11579048	RD3	-0.0421776	0.00827843	3.48979e-07	0.370439	protein_coding	TRUE
chr1	ENSG00000198570	cg04923746	rs11579048	RD3	-0.0267601	0.00540589	7.41478e-07	0.338744	protein_coding	TRUE
chr1	ENSG00000188672	cg21826606	rs760938	RHCE	1.32552	0.181829	3.1008e-13	0.0271524	protein_coding	FALSE
chr1	ENSG00000188672	cg03362483	rs760938	RHCE	0.286119	0.0405573	1.72999e-12	0.0167322	protein_coding	FALSE
chr1	ENSG00000188672	cg13386331	rs760938	RHCE	-0.401958	0.0577317	3.3423e-12	0.442036	protein_coding	TRUE
chr1	ENSG00000188672	cg25951697	rs760938	RHCE	1.83512	0.265406	4.69877e-12	0.0327405	protein_coding	FALSE
chr1	ENSG00000188672	cg12211490	rs760938	RHCE	-0.141194	0.0233227	1.41366e-09	0.413611	protein_coding	TRUE
chr1	ENSG00000188672	cg06678733	rs760938	RHCE	0.209964	0.0396599	1.19587e-07	2.55185e-05	protein_coding	FALSE
chr1	ENSG00000135828	cg19841283	rs4652733	RNASEL	-0.158793	0.0167691	2.81499e-21	0.389932	protein_coding	TRUE
chr1	ENSG00000135828	cg10931420	rs4652733	RNASEL	-0.112752	0.0123332	6.12359e-20	0.0419425	protein_coding	FALSE
chr1	ENSG00000135828	cg27563952	rs4652733	RNASEL	-0.144523	0.0158953	9.70649e-20	0.190334	protein_coding	TRUE
chr1	ENSG00000135828	cg08156924	rs4652733	RNASEL	-0.0756642	0.00846957	4.1217e-19	0.560445	protein_coding	TRUE
chr1	ENSG00000135828	cg02349066	rs4652733	RNASEL	-0.111941	0.0139565	1.05168e-15	0.798324	protein_coding	TRUE
chr1	ENSG00000135828	cg10740215	rs4652733	RNASEL	-0.100452	0.0126761	2.29025e-15	0.066905	protein_coding	TRUE
chr1	ENSG00000135828	cg00837947	rs4652733	RNASEL	-0.0787163	0.0102182	1.32328e-14	0.0786173	protein_coding	TRUE
chr1	ENSG00000135828	cg05616021	rs4652733	RNASEL	-0.0886506	0.0116557	2.83145e-14	0.0913463	protein_coding	TRUE
chr1	ENSG00000135828	cg02025632	rs4652733	RNASEL	-0.0517936	0.00696717	1.05402e-13	0.654972	protein_coding	TRUE
chr1	ENSG00000135828	cg20229934	rs4652733	RNASEL	-0.062144	0.00960963	1.0007e-10	0.0490517	protein_coding	FALSE
chr1	ENSG00000116514	cg14806693	rs520309	RNF19B	-0.0944446	0.0131446	6.71708e-13	0.190231	protein_coding	TRUE
chr1	ENSG00000116514	cg22166728	rs520309	RNF19B	-0.0572378	0.00835574	7.37915e-12	0.0415383	protein_coding	FALSE
chr1	ENSG00000116514	cg10120255	rs520309	RNF19B	-0.0530802	0.00780125	1.0171e-11	0.90602	protein_coding	TRUE
chr1	ENSG00000116514	cg26266099	rs520309	RNF19B	-0.0749237	0.0120017	4.29852e-10	0.0266149	protein_coding	FALSE
chr1	ENSG00000116514	cg00843917	rs520309	RNF19B	-0.0531921	0.00896236	2.93747e-09	0.846152	protein_coding	TRUE
chr1	ENSG00000116514	cg12919773	rs520309	RNF19B	-0.0409853	0.00800346	3.04003e-07	0.228173	protein_coding	TRUE
chr1	ENSG00000116514	cg12731430	rs16835227	RNF19B	0.051668	0.0104111	6.9482e-07	0.00742835	protein_coding	FALSE
chr1	ENSG00000176393	cg03981535	rs6689405	RNPEP	-0.283788	0.0541292	1.58158e-07	0.271157	protein_coding	TRUE
chr1	ENSG00000117748	cg21315111	rs142921625	RPA2	-0.093233	0.0186253	5.56556e-07	0.327484	protein_coding	TRUE
chr1	ENSG00000137996	cg04637881	rs11370389	RTCA	-0.637278	0.107567	3.13239e-09	0.000470923	protein_coding	FALSE
chr1	ENSG00000137996	cg11312524	rs11370389	RTCA	-0.204058	0.0355677	9.62764e-09	0.00144584	protein_coding	FALSE
chr1	ENSG00000137996	cg21895262	rs11370389	RTCA	-0.14193	0.0257358	3.4899e-08	5.42205e-08	protein_coding	FALSE
chr1	ENSG00000122481	cg21372392	rs259338	RWDD3	-0.349815	0.0388877	2.35146e-19	0.151663	protein_coding	TRUE
chr1	ENSG00000122481	cg10607462	rs11582082	RWDD3	0.0745656	0.0149999	6.65844e-07	0.245212	protein_coding	TRUE
chr1	ENSG00000189171	cg08477332	rs142102043	S100A13	0.583671	0.078378	9.55813e-14	0.146323	protein_coding	TRUE
chr1	ENSG00000189171	cg26548293	rs142102043	S100A13	-0.198474	0.0311507	1.87304e-10	8.2916e-07	protein_coding	FALSE
chr1	ENSG00000189171	cg04077668	rs142102043	S100A13	0.113415	0.0178972	2.3424e-10	0.333765	protein_coding	TRUE
chr1	ENSG00000189171	cg16348003	rs142102043	S100A13	0.166575	0.0266114	3.86124e-10	0.345881	protein_coding	TRUE
chr1	ENSG00000189171	cg01347250	rs142102043	S100A13	0.152283	0.0248491	8.88145e-10	0.155963	protein_coding	TRUE
chr1	ENSG00000189171	cg15104031	rs142102043	S100A13	-0.113073	0.0184865	9.56563e-10	0.2172	protein_coding	TRUE
chr1	ENSG00000189171	cg11915664	rs142102043	S100A13	0.114657	0.0191603	2.17592e-09	0.264145	protein_coding	TRUE
chr1	ENSG00000189171	cg16282977	rs142102043	S100A13	-0.119631	0.0201521	2.91324e-09	0.323067	protein_coding	TRUE
chr1	ENSG00000189171	cg26148377	rs142102043	S100A13	-0.190758	0.0342444	2.54021e-08	0.0480459	protein_coding	FALSE
chr1	ENSG00000189171	cg11596404	rs142102043	S100A13	0.128221	0.0230448	2.63662e-08	0.476985	protein_coding	TRUE
chr1	ENSG00000189171	cg27469660	rs142102043	S100A13	0.111157	0.0218778	3.75867e-07	0.587213	protein_coding	TRUE
chr1	ENSG00000188643	cg08477332	rs9700179	S100A16	1.12747	0.211206	9.38575e-08	0.707124	protein_coding	TRUE
chr1	ENSG00000188643	cg16348003	rs9700179	S100A16	0.335642	0.0677488	7.26205e-07	0.930652	protein_coding	TRUE
chr1	ENSG00000116171	cg27535305	rs1242314	SCP2	-0.0777356	0.00769147	5.15764e-24	0.261777	protein_coding	TRUE
chr1	ENSG00000116171	cg02813845	rs1242314	SCP2	-0.113353	0.011484	5.58514e-23	0.41826	protein_coding	TRUE
chr1	ENSG00000116171	cg05909164	rs1242314	SCP2	-0.108664	0.011029	6.68029e-23	0.0250576	protein_coding	FALSE
chr1	ENSG00000116171	cg01802117	rs1242314	SCP2	-0.162891	0.0165532	7.53365e-23	0.249094	protein_coding	TRUE
chr1	ENSG00000116171	cg20055417	rs1242314	SCP2	-0.130733	0.0132908	7.85396e-23	0.205921	protein_coding	TRUE
chr1	ENSG00000116171	cg24543286	rs1242314	SCP2	-0.092984	0.00961679	4.08647e-22	0.129381	protein_coding	TRUE
chr1	ENSG00000116171	cg12220753	rs1242314	SCP2	-0.100005	0.0103671	5.08879e-22	0.113527	protein_coding	TRUE
chr1	ENSG00000116171	cg25767906	rs1242314	SCP2	-0.0909397	0.0094297	5.21366e-22	0.445039	protein_coding	TRUE
chr1	ENSG00000116171	cg03609269	rs1242314	SCP2	-0.0838834	0.00873011	7.36023e-22	0.318339	protein_coding	TRUE
chr1	ENSG00000116171	cg05232215	rs1242314	SCP2	-0.102968	0.0110282	9.93021e-21	0.157286	protein_coding	TRUE
chr1	ENSG00000116171	cg03579872	rs1242314	SCP2	-0.0580108	0.00624463	1.54705e-20	0.616269	protein_coding	TRUE
chr1	ENSG00000116171	cg08859206	rs1242314	SCP2	-0.0878875	0.0100356	1.99492e-18	0.682347	protein_coding	TRUE
chr1	ENSG00000116171	cg13685833	rs1242314	SCP2	-0.102814	0.01351	2.73643e-14	0.396405	protein_coding	TRUE
chr1	ENSG00000116171	cg06600287	rs1242314	SCP2	-0.035452	0.00494737	7.73116e-13	0.956526	protein_coding	TRUE
chr1	ENSG00000116171	cg24675658	rs1242314	SCP2	-0.0240236	0.0036432	4.27867e-11	0.0294851	protein_coding	FALSE
chr1	ENSG00000116171	cg10554624	rs1242314	SCP2	-0.0218276	0.00331602	4.62767e-11	0.399614	protein_coding	TRUE
chr1	ENSG00000116171	cg04527603	rs1242314	SCP2	-0.0250894	0.00384976	7.1672e-11	0.044833	protein_coding	FALSE
chr1	ENSG00000116171	cg04310824	rs1242314	SCP2	-0.0296514	0.00478599	5.81146e-10	0.476668	protein_coding	TRUE
chr1	ENSG00000116171	cg16325326	rs1242314	SCP2	0.104869	0.0178299	4.0621e-09	0.000586811	protein_coding	FALSE
chr1	ENSG00000116171	cg12060472	rs1242314	SCP2	-0.0231187	0.00448833	2.59307e-07	0.328293	protein_coding	TRUE
chr1	ENSG00000143252	cg02954704	rs55898518	SDHC	0.0488296	0.00615199	2.06798e-15	0.167555	protein_coding	TRUE
chr1	ENSG00000143252	cg25597117	rs55898518	SDHC	0.0581046	0.0076486	3.03632e-14	0.326343	protein_coding	TRUE
chr1	ENSG00000117601	ch.1.173201084F	rs6425272	SERPINC1	0.380089	0.0585288	8.35554e-11	0.507447	protein_coding	TRUE
chr1	ENSG00000198892	cg06750292	rs4025034	SHISA4	-0.322553	0.0423997	2.79554e-14	0.446994	protein_coding	TRUE
chr1	ENSG00000198892	cg00410788	rs4025034	SHISA4	-0.291605	0.041302	1.6612e-12	0.640926	protein_coding	TRUE
chr1	ENSG00000198892	cg22572173	rs4025034	SHISA4	-0.236311	0.035908	4.67245e-11	0.644232	protein_coding	TRUE
chr1	ENSG00000198892	cg06775570	rs4025034	SHISA4	-0.15366	0.024461	3.34598e-10	0.9745	protein_coding	TRUE
chr1	ENSG00000198892	cg11586189	rs4025034	SHISA4	-0.160023	0.0255352	3.68608e-10	0.953943	protein_coding	TRUE
chr1	ENSG00000198892	cg05582926	rs4025034	SHISA4	-0.233222	0.0377648	6.58938e-10	0.889544	protein_coding	TRUE
chr1	ENSG00000198892	cg02494290	rs4025034	SHISA4	0.249824	0.04205	2.83067e-09	0.347439	protein_coding	TRUE
chr1	ENSG00000198892	cg00328217	rs4025034	SHISA4	-0.19644	0.0343614	1.08499e-08	0.564734	protein_coding	TRUE
chr1	ENSG00000198892	cg14263176	rs4025034	SHISA4	-0.145608	0.0289376	4.8588e-07	0.368293	protein_coding	TRUE
chr1	ENSG00000085491	cg05918124	rs61799378	SLC25A24	-0.12192	0.0174524	2.83182e-12	0.155585	protein_coding	TRUE
chr1	ENSG00000085491	cg24323958	rs61799378	SLC25A24	-0.0827449	0.0137193	1.62664e-09	0.916068	protein_coding	TRUE
chr1	ENSG00000085491	cg01849514	rs61799378	SLC25A24	-0.164026	0.0286012	9.75654e-09	0.549745	protein_coding	TRUE
chr1	ENSG00000085491	cg06828260	rs61799378	SLC25A24	-0.0765598	0.0152176	4.87935e-07	0.379767	protein_coding	TRUE
chr1	ENSG00000162461	cg03420647	rs1108185	SLC25A34	-0.668569	0.0604231	1.85893e-28	0.927245	protein_coding	TRUE
chr1	ENSG00000162461	cg22956858	rs1108185	SLC25A34	-0.627037	0.0611286	1.09321e-24	0.985461	protein_coding	TRUE
chr1	ENSG00000162461	cg10483611	rs1108185	SLC25A34	-0.210549	0.0244805	7.92443e-18	0.974749	protein_coding	TRUE
chr1	ENSG00000160785	cg24450063	rs2072499	SLC25A44	-0.412798	0.0521621	2.49713e-15	0.0715436	protein_coding	TRUE
chr1	ENSG00000160785	cg25208724	rs2072499	SLC25A44	-0.459104	0.0592741	9.52519e-15	0.0509252	protein_coding	TRUE
chr1	ENSG00000160785	cg06970220	rs2072499	SLC25A44	-0.0927468	0.0139965	3.43912e-11	0.00011417	protein_coding	FALSE
chr1	ENSG00000227533	cg09003612	rs17387775	SLC2A1-AS1	-0.383032	0.0239464	1.37627e-57	1.58312e-08	lncRNA	FALSE
chr1	ENSG00000227533	cg12656391	rs17387775	SLC2A1-AS1	-0.31799	0.0224944	2.26577e-45	3.24266e-09	lncRNA	FALSE
chr1	ENSG00000227533	cg14945834	rs17387775	SLC2A1-AS1	-0.226552	0.0167084	6.99287e-42	1.00391e-07	lncRNA	FALSE
chr1	ENSG00000227533	cg00102166	rs17387775	SLC2A1-AS1	-0.282075	0.0222228	6.46308e-37	1.37543e-08	lncRNA	FALSE
chr1	ENSG00000227533	cg06792911	rs17387775	SLC2A1-AS1	-0.195757	0.0160239	2.53452e-34	1.07179e-06	lncRNA	FALSE
chr1	ENSG00000227533	cg09824328	rs17387775	SLC2A1-AS1	-0.373203	0.0356261	1.1188e-25	5.06826e-05	lncRNA	FALSE
chr1	ENSG00000227533	cg12101479	rs17387775	SLC2A1-AS1	-0.112345	0.0140271	1.15543e-15	0.00869776	lncRNA	FALSE
chr1	ENSG00000227533	cg15089806	rs710221	SLC2A1-AS1	-0.0511432	0.00933532	4.2904e-08	0.0120891	lncRNA	FALSE
chr1	ENSG00000227533	cg20282814	rs710221	SLC2A1-AS1	-0.0989699	0.0194183	3.45578e-07	0.189213	lncRNA	TRUE
chr1	ENSG00000158715	cg11965913	rs823130	SLC45A3	5.00566	0.904436	3.12e-08	0.0710008	protein_coding	TRUE
chr1	ENSG00000158715	cg07533224	rs823130	SLC45A3	3.93922	0.712608	3.24107e-08	0.122186	protein_coding	TRUE
chr1	ENSG00000158715	cg14893161	rs823130	SLC45A3	3.9629	0.721874	4.02517e-08	0.0909669	protein_coding	TRUE
chr1	ENSG00000158715	cg12898220	rs823130	SLC45A3	3.60702	0.657872	4.1852e-08	0.138503	protein_coding	TRUE
chr1	ENSG00000158715	cg14159672	rs823130	SLC45A3	4.24845	0.779461	5.02287e-08	0.100418	protein_coding	TRUE
chr1	ENSG00000158715	cg07167872	rs823130	SLC45A3	2.65661	0.489259	5.64004e-08	0.0652819	protein_coding	TRUE
chr1	ENSG00000158715	cg05841700	rs823130	SLC45A3	3.25294	0.601264	6.29636e-08	0.100593	protein_coding	TRUE
chr1	ENSG00000158715	cg24503407	rs823130	SLC45A3	2.35446	0.438954	8.14872e-08	0.116181	protein_coding	TRUE
chr1	ENSG00000158715	cg16334093	rs823130	SLC45A3	1.61326	0.305184	1.24881e-07	0.0706248	protein_coding	TRUE
chr1	ENSG00000158715	cg07157834	rs823130	SLC45A3	1.10045	0.216771	3.84353e-07	0.0956826	protein_coding	TRUE
chr1	ENSG00000158715	cg17178900	rs823130	SLC45A3	1.59068	0.316056	4.83082e-07	0.149424	protein_coding	TRUE
chr1	ENSG00000158715	cg03827427	rs823130	SLC45A3	-0.850801	0.172742	8.42457e-07	0.562881	protein_coding	TRUE
chr1	ENSG00000162753	ch.1.173201084F	rs11450962	SLC9C2	0.648617	0.106228	1.02228e-09	0.313441	protein_coding	TRUE
chr1	ENSG00000198952	cg11078824	rs933489	SMG5	-0.0253635	0.00428297	3.18153e-09	0.413421	protein_coding	TRUE
chr1	ENSG00000188004	cg23902969	rs11587021	SNHG28	-0.498025	0.0946436	1.42411e-07	0.00197399	lncRNA	FALSE
chr1	ENSG00000182004	cg06642677	rs11240607	SNRPE	0.394117	0.0606389	8.06337e-11	0.540001	protein_coding	TRUE
chr1	ENSG00000126091	cg08959526	rs114361356	ST3GAL3	0.297683	0.0581522	3.07114e-07	0.115163	protein_coding	TRUE
chr1	ENSG00000126091	cg12619880	rs114361356	ST3GAL3	-0.300661	0.0604901	6.68063e-07	0.0622195	protein_coding	TRUE
chr1	ENSG00000198842	cg23659062	rs10918634	STYXL2	-0.35449	0.0474727	8.18931e-14	0.110815	protein_coding	TRUE
chr1	ENSG00000198842	cg21693676	rs10918634	STYXL2	-0.140759	0.0256298	3.97363e-08	0.119609	protein_coding	TRUE
chr1	ENSG00000092607	cg26570165	rs12022745	TBX15	2.49356	0.388326	1.35104e-10	0.153053	protein_coding	TRUE
chr1	ENSG00000092607	cg14204462	rs12022745	TBX15	1.76071	0.291574	1.55413e-09	0.0640837	protein_coding	TRUE
chr1	ENSG00000092607	cg06764239	rs12022745	TBX15	1.70503	0.292256	5.4104e-09	0.179257	protein_coding	TRUE
chr1	ENSG00000092607	cg10572355	rs12022745	TBX15	1.21627	0.216218	1.85296e-08	0.00841882	protein_coding	FALSE
chr1	ENSG00000092607	cg26856924	rs12022745	TBX15	0.781997	0.142816	4.36176e-08	0.874779	protein_coding	TRUE
chr1	ENSG00000092607	cg17479943	rs12022745	TBX15	1.60761	0.294003	4.55093e-08	0.0184174	protein_coding	FALSE
chr1	ENSG00000092607	cg17180237	rs12022745	TBX15	1.50757	0.280139	7.38719e-08	0.0118736	protein_coding	FALSE
chr1	ENSG00000092607	cg09815769	rs12022745	TBX15	1.22366	0.229449	9.6578e-08	0.00235011	protein_coding	FALSE
chr1	ENSG00000092607	cg15724945	rs12022745	TBX15	1.48021	0.281373	1.43533e-07	0.0571303	protein_coding	TRUE
chr1	ENSG00000092607	cg09628195	rs12022745	TBX15	1.07619	0.207599	2.17192e-07	0.256104	protein_coding	TRUE
chr1	ENSG00000092607	cg15159324	rs12022745	TBX15	0.73173	0.14251	2.82735e-07	0.0258113	protein_coding	FALSE
chr1	ENSG00000092607	cg13573036	rs12022745	TBX15	1.02647	0.2063	6.50344e-07	0.248879	protein_coding	TRUE
chr1	ENSG00000152760	cg11580118	rs539014	TCTEX1D1	-0.132019	0.026591	6.87765e-07	0.011982	protein_coding	FALSE
chr1	ENSG00000162782	cg08376771	rs76644806	TDRD5	-0.199399	0.0291158	7.46326e-12	0.119169	protein_coding	TRUE
chr1	ENSG00000162782	cg13848905	rs76644806	TDRD5	-0.311967	0.0518775	1.81518e-09	0.257823	protein_coding	TRUE
chr1	ENSG00000162782	cg16874812	rs76644806	TDRD5	-0.322778	0.0539667	2.21684e-09	0.0116517	protein_coding	FALSE
chr1	ENSG00000182134	cg23864823	rs7523001	TDRKH	0.108186	0.0193824	2.382e-08	0.0570096	protein_coding	TRUE
chr1	ENSG00000203288	cg07092448	rs6664467	TDRKH-AS1	1.6919	0.340796	6.88574e-07	0.132257	lncRNA	TRUE
chr1	ENSG00000133069	cg11170025	rs1172113	TMCC2	-0.0573116	0.00958425	2.23449e-09	0.202609	protein_coding	TRUE
chr1	ENSG00000133069	cg10768996	rs1172113	TMCC2	-0.0481559	0.00870377	3.15234e-08	0.544424	protein_coding	TRUE
chr1	ENSG00000224358	cg10234330	rs11430311	TMCO1-AS1	-0.82599	0.149572	3.34468e-08	0.201995	lncRNA	TRUE
chr1	ENSG00000116783	cg21446242	rs9970514	TNNI3K	-0.109981	0.0201933	5.13924e-08	0.141475	protein_coding	TRUE
chr1	ENSG00000158882	cg10855283	rs5082	TOMM40L	0.172974	0.0299977	8.10557e-09	0.481795	protein_coding	TRUE
chr1	ENSG00000134198	cg01522456	rs6688453	TSPAN2	0.195348	0.0377956	2.3593e-07	0.0176817	protein_coding	FALSE
chr1	ENSG00000134198	cg14867388	rs1967711	TSPAN2	0.6268	0.124799	5.10114e-07	0.994067	protein_coding	TRUE
chr1	ENSG00000215845	cg11578532	rs6427573	TSTD1	-0.822276	0.108567	3.62165e-14	0.0308532	protein_coding	FALSE
chr1	ENSG00000215845	cg00329300	rs6427573	TSTD1	-0.67454	0.0948601	1.15294e-12	0.0638857	protein_coding	TRUE
chr1	ENSG00000215845	cg12426196	rs6427573	TSTD1	-0.642797	0.0941856	8.80569e-12	0.1664	protein_coding	TRUE
chr1	ENSG00000215845	cg24161057	rs6427573	TSTD1	-0.780887	0.114844	1.04967e-11	0.0755505	protein_coding	TRUE
chr1	ENSG00000215845	cg24411043	rs6427573	TSTD1	-0.545997	0.0803069	1.05439e-11	0.186801	protein_coding	TRUE
chr1	ENSG00000215845	cg18147168	rs6427573	TSTD1	-0.516144	0.076138	1.20959e-11	0.0930349	protein_coding	TRUE
chr1	ENSG00000215845	cg13466383	rs6427573	TSTD1	-0.558124	0.0886771	3.09604e-10	0.261479	protein_coding	TRUE
chr1	ENSG00000215845	cg00446235	rs6427573	TSTD1	-0.552221	0.0883094	4.01994e-10	0.688173	protein_coding	TRUE
chr1	ENSG00000215845	cg13906823	rs6427573	TSTD1	-0.625311	0.100566	5.0372e-10	0.174563	protein_coding	TRUE
chr1	ENSG00000215845	cg27180868	rs6427573	TSTD1	-0.526264	0.0872608	1.63008e-09	0.630486	protein_coding	TRUE
chr1	ENSG00000215845	cg11731300	rs6427573	TSTD1	-0.524068	0.0994064	1.34965e-07	0.525209	protein_coding	TRUE
chr1	ENSG00000215845	cg20012024	rs6427573	TSTD1	0.259778	0.0510136	3.53714e-07	0.309972	protein_coding	TRUE
chr1	ENSG00000162402	cg09072162	rs41294827	USP24	0.157389	0.0296319	1.08741e-07	0.317712	protein_coding	TRUE
chr1	ENSG00000162402	cg25957967	rs41294827	USP24	0.0807494	0.0157454	2.92164e-07	0.150246	protein_coding	TRUE
chr1	ENSG00000162402	cg17826594	rs41294827	USP24	0.08256	0.0163639	4.52936e-07	0.264073	protein_coding	TRUE
chr1	ENSG00000162402	cg13191808	rs41294827	USP24	0.0959242	0.0192894	6.59575e-07	0.370507	protein_coding	TRUE
chr1	ENSG00000162402	cg14214659	rs41294827	USP24	0.057142	0.0115304	7.20384e-07	0.290429	protein_coding	TRUE
chr1	ENSG00000116874	cg09628195	rs2765543	WARS2	0.0873133	0.012243	9.91583e-13	0.000802341	protein_coding	FALSE
chr1	ENSG00000116874	cg13512890	rs2765543	WARS2	-0.117626	0.016536	1.13304e-12	0.000964551	protein_coding	FALSE
chr1	ENSG00000116874	cg19316303	rs2765543	WARS2	-0.0459048	0.00757597	1.36742e-09	0.00975526	protein_coding	FALSE
chr1	ENSG00000116874	cg21301805	rs2645291	WARS2	-0.0671854	0.0131632	3.32501e-07	0.00975805	protein_coding	FALSE
chr1	ENSG00000116874	cg13573036	rs2645291	WARS2	-0.0587965	0.0117106	5.14646e-07	0.00202267	protein_coding	FALSE
chr1	ENSG00000231365	cg13512890	rs10923754	WARS2-AS1	-0.568454	0.0787591	5.29001e-13	0.273891	lncRNA	TRUE
chr1	ENSG00000231365	cg19316303	rs10923754	WARS2-AS1	-0.215722	0.0348162	5.79076e-10	0.953077	lncRNA	TRUE
chr1	ENSG00000231365	cg09628195	rs10923754	WARS2-AS1	0.311056	0.0564814	3.6452e-08	0.0651511	lncRNA	TRUE
chr1	ENSG00000196418	cg21263208	rs10158232	ZNF124	0.382814	0.0526871	3.70855e-13	0.947984	protein_coding	TRUE
chr1	ENSG00000249087	cg22502492	rs57254366	ZNF436-AS1	0.118012	0.0221181	9.52627e-08	0.791512	lncRNA	TRUE
chr1	ENSG00000162378	cg27535305	rs71044430	ZYG11B	0.216871	0.0440894	8.70325e-07	0.0846747	protein_coding	TRUE
chr1	ENSG00000162378	cg02813845	rs71044430	ZYG11B	0.321671	0.0654482	8.88311e-07	0.00227462	protein_coding	FALSE
chr1	ENSG00000242349	cg07532960	rs198361	NPPA-AS1	-0.279932	0.0449409	4.6973e-10	0.911673	antisense	TRUE
chr1	ENSG00000228106	cg22352176	rs17476063	RP11-452F19.3	-1.16647	0.225726	2.37072e-07	0.567481	lincRNA	TRUE
chr1	ENSG00000228106	cg21908664	rs17476063	RP11-452F19.3	-1.12585	0.217891	2.37825e-07	0.632999	lincRNA	TRUE
chr1	ENSG00000228106	cg13253887	rs17476063	RP11-452F19.3	-3.3118	0.647725	3.17121e-07	0.388033	lincRNA	TRUE
chr1	ENSG00000116957	cg25368836	rs6691760	TBCE	0.171974	0.0336649	3.24886e-07	0.124711	protein_coding	TRUE
chr1	ENSG00000242349	cg21218089	rs11811524	NPPA-AS1	0.255634	0.0510409	5.48818e-07	0.179552	antisense	TRUE
chr1	ENSG00000116957	cg02985240	rs6691760	TBCE	0.257718	0.0515745	5.82295e-07	0.144711	protein_coding	TRUE
chr10	ENSG00000099204	cg15294435	rs7904491	ABLIM1	-0.0175263	0.00317651	3.4391e-08	0.920048	protein_coding	TRUE
chr10	ENSG00000099204	cg12736146	rs7904491	ABLIM1	-0.0165595	0.00305754	6.09651e-08	0.773613	protein_coding	TRUE
chr10	ENSG00000099204	cg21050356	rs7904491	ABLIM1	-0.0153895	0.00287903	9.02209e-08	0.89501	protein_coding	TRUE
chr10	ENSG00000099204	cg01315572	rs7904491	ABLIM1	-0.02189	0.00410784	9.88407e-08	0.580612	protein_coding	TRUE
chr10	ENSG00000099204	cg20218110	rs7904491	ABLIM1	-0.0119683	0.00226426	1.25203e-07	0.635027	protein_coding	TRUE
chr10	ENSG00000099204	cg26760942	rs7904491	ABLIM1	-0.011137	0.00214661	2.12351e-07	0.956074	protein_coding	TRUE
chr10	ENSG00000099204	cg18680346	rs7904491	ABLIM1	-0.0332104	0.00640228	2.13387e-07	0.973684	protein_coding	TRUE
chr10	ENSG00000099204	cg01449818	rs7904491	ABLIM1	-0.00891693	0.00172556	2.3716e-07	0.88045	protein_coding	TRUE
chr10	ENSG00000099204	cg03223072	rs7904491	ABLIM1	-0.00913145	0.00177553	2.70459e-07	0.730511	protein_coding	TRUE
chr10	ENSG00000099204	cg08587685	rs7904491	ABLIM1	-0.0131242	0.00255189	2.70482e-07	0.172649	protein_coding	TRUE
chr10	ENSG00000099204	cg18574731	rs7904491	ABLIM1	-0.00765045	0.00153737	6.48077e-07	0.791969	protein_coding	TRUE
chr10	ENSG00000099204	cg19936380	rs7904491	ABLIM1	-0.00989743	0.00199958	7.43022e-07	0.979588	protein_coding	TRUE
chr10	ENSG00000099204	cg06769992	rs7904491	ABLIM1	-0.00929898	0.00188113	7.68142e-07	0.673655	protein_coding	TRUE
chr10	ENSG00000279088	cg23231163	rs35611463	AC022400.6	0.264044	0.0414483	1.88492e-10	0.562114	TEC	TRUE
chr10	ENSG00000279088	cg04320760	rs35611463	AC022400.6	0.173946	0.0274604	2.38228e-10	0.532002	TEC	TRUE
chr10	ENSG00000279088	cg19442545	rs35611463	AC022400.6	0.269366	0.0446042	1.55046e-09	0.523661	TEC	TRUE
chr10	ENSG00000279088	cg15838173	rs35611463	AC022400.6	0.18201	0.0355759	3.11896e-07	0.401625	TEC	TRUE
chr10	ENSG00000188234	cg20177502	rs10751384	AGAP4	0.0523542	0.00770675	1.09603e-11	0.321187	protein_coding	TRUE
chr10	ENSG00000264204	cg09832911	rs7894352	AGAP7P	-0.0689027	0.0130746	1.36433e-07	0.0928646	unprocessed_pseudogene	TRUE
chr10	ENSG00000264204	cg26291600	rs11239599	AGAP7P	-0.0574126	0.0113378	4.10915e-07	0.233099	unprocessed_pseudogene	TRUE
chr10	ENSG00000042286	cg01240734	rs1053105	AIFM2	0.756751	0.140508	7.21165e-08	0.503118	protein_coding	TRUE
chr10	ENSG00000042286	cg15661580	rs1053105	AIFM2	0.488724	0.0928344	1.40592e-07	0.472564	protein_coding	TRUE
chr10	ENSG00000271335	cg04781305	rs10764039	AL117336.2	-0.592556	0.0719056	1.7114e-16	0.365808	lncRNA	TRUE
chr10	ENSG00000271335	cg20832054	rs10764039	AL117336.2	0.64942	0.0837185	8.68302e-15	0.393255	lncRNA	TRUE
chr10	ENSG00000271335	cg26075072	rs10764039	AL117336.2	-0.518915	0.0674371	1.41714e-14	0.21662	lncRNA	TRUE
chr10	ENSG00000271335	cg18937502	rs10764039	AL117336.2	-0.856848	0.116766	2.16516e-13	0.460613	lncRNA	TRUE
chr10	ENSG00000271335	cg10322464	rs10764039	AL117336.2	-0.412727	0.0588941	2.41839e-12	0.479327	lncRNA	TRUE
chr10	ENSG00000271335	cg16939751	rs10764039	AL117336.2	-0.382296	0.0604434	2.53453e-10	0.554031	lncRNA	TRUE
chr10	ENSG00000107890	cg14240646	rs2780677	ANKRD26	-0.692318	0.130459	1.11566e-07	0.114152	protein_coding	TRUE
chr10	ENSG00000165322	cg04359828	rs144466157	ARHGAP12	-0.0560445	0.00485946	8.9881e-31	0.863702	protein_coding	TRUE
chr10	ENSG00000165322	cg26784012	rs144466157	ARHGAP12	-0.0470052	0.00434491	2.81474e-27	0.925554	protein_coding	TRUE
chr10	ENSG00000165322	cg18675610	rs144466157	ARHGAP12	-0.0501861	0.00482028	2.19839e-25	0.978876	protein_coding	TRUE
chr10	ENSG00000165322	cg02093006	rs144466157	ARHGAP12	-0.0304958	0.00320012	1.57928e-21	0.558729	protein_coding	TRUE
chr10	ENSG00000165322	cg21279476	rs144466157	ARHGAP12	-0.0214536	0.00244207	1.56365e-18	0.173304	protein_coding	TRUE
chr10	ENSG00000165322	cg09642378	rs144466157	ARHGAP12	-0.0297513	0.00352565	3.21365e-17	0.306942	protein_coding	TRUE
chr10	ENSG00000165322	cg22706007	rs144466157	ARHGAP12	-0.0196343	0.00319068	7.5729e-10	0.799734	protein_coding	TRUE
chr10	ENSG00000165322	cg03690434	rs144466157	ARHGAP12	-0.0127057	0.00213742	2.7746e-09	0.000585528	protein_coding	FALSE
chr10	ENSG00000165322	cg06004637	rs144466157	ARHGAP12	-0.0136302	0.00241624	1.68989e-08	0.713897	protein_coding	TRUE
chr10	ENSG00000165322	cg23473204	rs144466157	ARHGAP12	0.0102857	0.00203731	4.44885e-07	0.229638	protein_coding	TRUE
chr10	ENSG00000214435	cg17281126	rs12416687	AS3MT	0.146284	0.0203211	6.0814e-13	0.000845381	protein_coding	FALSE
chr10	ENSG00000214435	cg17540006	rs12416687	AS3MT	-0.100138	0.0141923	1.71618e-12	0.0120195	protein_coding	FALSE
chr10	ENSG00000214435	cg00035347	rs12416687	AS3MT	0.128951	0.0200809	1.34859e-10	0.0243276	protein_coding	FALSE
chr10	ENSG00000214435	cg23093090	rs12416687	AS3MT	0.0698672	0.0109458	1.73613e-10	0.201227	protein_coding	TRUE
chr10	ENSG00000214435	cg13349042	rs12416687	AS3MT	-0.123537	0.0197674	4.11701e-10	0.00591085	protein_coding	FALSE
chr10	ENSG00000214435	cg18882449	rs12416687	AS3MT	-0.0670285	0.012876	1.93274e-07	0.0110746	protein_coding	FALSE
chr10	ENSG00000214435	cg10116432	rs12416687	AS3MT	0.0913267	0.0175545	1.96661e-07	0.00236158	protein_coding	FALSE
chr10	ENSG00000214435	cg05855489	rs12416687	AS3MT	-0.140053	0.0272031	2.62694e-07	0.00299137	protein_coding	FALSE
chr10	ENSG00000214435	cg09135741	rs12416687	AS3MT	0.0681382	0.0135936	5.37217e-07	0.000972221	protein_coding	FALSE
chr10	ENSG00000214435	cg11453585	rs12416687	AS3MT	0.0947316	0.0192073	8.13648e-07	0.000546943	protein_coding	FALSE
chr10	ENSG00000188611	cg19501312	rs12253161	ASAH2	-0.018193	0.0034681	1.55596e-07	0.399743	protein_coding	TRUE
chr10	ENSG00000196372	cg26603656	rs4747325	ASB13	0.0634209	0.0107912	4.17592e-09	0.0469381	protein_coding	FALSE
chr10	ENSG00000196372	cg22751264	rs4747325	ASB13	-0.0573828	0.0108006	1.07883e-07	0.489285	protein_coding	TRUE
chr10	ENSG00000107669	cg07444487	rs11200264	ATE1	0.696449	0.120488	7.45959e-09	1.01982e-05	protein_coding	FALSE
chr10	ENSG00000107669	cg20835665	rs11200264	ATE1	0.619417	0.10824	1.04897e-08	0.000152145	protein_coding	FALSE
chr10	ENSG00000107669	cg09943237	rs11200264	ATE1	0.533037	0.0932279	1.08061e-08	0.000263287	protein_coding	FALSE
chr10	ENSG00000107669	cg13812702	rs11200264	ATE1	0.507167	0.088886	1.15783e-08	7.63589e-05	protein_coding	FALSE
chr10	ENSG00000107669	cg27030141	rs11200264	ATE1	0.472905	0.0844362	2.13438e-08	0.000794629	protein_coding	FALSE
chr10	ENSG00000107669	cg03417454	rs11200264	ATE1	0.240481	0.0445249	6.62495e-08	0.00509625	protein_coding	FALSE
chr10	ENSG00000107669	cg11364714	rs11200264	ATE1	0.171688	0.0319047	7.39599e-08	0.00081457	protein_coding	FALSE
chr10	ENSG00000226864	cg07444487	rs10887024	ATE1-AS1	-1.58606	0.124121	2.16685e-37	0.601975	transcribed_unitary_pseudogene	TRUE
chr10	ENSG00000226864	cg09943237	rs10887024	ATE1-AS1	-1.21453	0.0995748	3.21833e-34	0.535653	transcribed_unitary_pseudogene	TRUE
chr10	ENSG00000226864	cg13812702	rs10887024	ATE1-AS1	-1.16127	0.0953545	4.04835e-34	0.476952	transcribed_unitary_pseudogene	TRUE
chr10	ENSG00000226864	cg20835665	rs10887024	ATE1-AS1	-1.4062	0.115468	4.05751e-34	0.38469	transcribed_unitary_pseudogene	TRUE
chr10	ENSG00000226864	cg27030141	rs10887024	ATE1-AS1	-1.06888	0.096101	9.75269e-29	0.468829	transcribed_unitary_pseudogene	TRUE
chr10	ENSG00000226864	cg03417454	rs10887024	ATE1-AS1	-0.549981	0.0550505	1.67758e-23	0.646872	transcribed_unitary_pseudogene	TRUE
chr10	ENSG00000226864	cg11364714	rs10887024	ATE1-AS1	-0.383757	0.040005	8.57775e-22	0.652085	transcribed_unitary_pseudogene	TRUE
chr10	ENSG00000226864	cg23691251	rs10887024	ATE1-AS1	-0.109841	0.0178316	7.27768e-10	0.430803	transcribed_unitary_pseudogene	TRUE
chr10	ENSG00000226864	cg13320271	rs10887024	ATE1-AS1	0.204841	0.0335061	9.74479e-10	0.925221	transcribed_unitary_pseudogene	TRUE
chr10	ENSG00000165626	cg14257042	rs10906394	BEND7	-0.124942	0.0096418	2.10762e-38	0.340681	protein_coding	TRUE
chr10	ENSG00000165626	cg24867665	rs10906394	BEND7	-0.0528017	0.00566759	1.20308e-20	0.128194	protein_coding	TRUE
chr10	ENSG00000165626	cg24638211	rs10906394	BEND7	-0.0147915	0.00228481	9.55361e-11	0.0523902	protein_coding	TRUE
chr10	ENSG00000165626	cg23114594	rs10906394	BEND7	-0.0207322	0.00409294	4.07613e-07	0.684579	protein_coding	TRUE
chr10	ENSG00000107779	cg19051661	rs7180	BMPR1A	0.169381	0.0256988	4.36884e-11	0.142593	protein_coding	TRUE
chr10	ENSG00000166275	cg17281126	rs9527	BORCS7	0.079603	0.010017	1.91355e-15	3.82026e-05	protein_coding	FALSE
chr10	ENSG00000166275	cg17540006	rs9527	BORCS7	-0.0534322	0.00703636	3.10814e-14	0.00580702	protein_coding	FALSE
chr10	ENSG00000166275	cg00035347	rs9527	BORCS7	0.0729932	0.00996522	2.39258e-13	0.00521311	protein_coding	FALSE
chr10	ENSG00000166275	cg23093090	rs9527	BORCS7	0.0375444	0.00547616	7.0835e-12	0.0621306	protein_coding	TRUE
chr10	ENSG00000166275	cg13349042	rs9527	BORCS7	-0.0633822	0.0099647	2.00868e-10	0.00173679	protein_coding	FALSE
chr10	ENSG00000166275	cg09135741	rs9527	BORCS7	0.0384065	0.00689098	2.49743e-08	0.000662815	protein_coding	FALSE
chr10	ENSG00000166275	cg11453585	rs9527	BORCS7	0.0527465	0.00975663	6.43681e-08	0.000414337	protein_coding	FALSE
chr10	ENSG00000166275	cg10116432	rs9527	BORCS7	0.0477293	0.00893722	9.26864e-08	0.000107387	protein_coding	FALSE
chr10	ENSG00000166275	cg05855489	rs9527	BORCS7	-0.0729641	0.0138607	1.40867e-07	0.000217066	protein_coding	FALSE
chr10	ENSG00000166275	cg18882449	rs9527	BORCS7	-0.0341324	0.00656872	2.03406e-07	0.00218389	protein_coding	FALSE
chr10	ENSG00000215146	cg23853165	rs35695462	BX322639.1	0.233566	0.0258848	1.82557e-19	0.318891	transcribed_unprocessed_pseudogene	TRUE
chr10	ENSG00000215146	cg27080085	rs35695462	BX322639.1	-0.138722	0.0175735	2.93165e-15	0.118641	transcribed_unprocessed_pseudogene	TRUE
chr10	ENSG00000215146	cg24598948	rs35695462	BX322639.1	-0.202824	0.0295024	6.20635e-12	0.965597	transcribed_unprocessed_pseudogene	TRUE
chr10	ENSG00000215146	cg01485177	rs35695462	BX322639.1	-0.150243	0.023995	3.81502e-10	0.282096	transcribed_unprocessed_pseudogene	TRUE
chr10	ENSG00000215146	cg08967936	rs35695462	BX322639.1	0.192481	0.0314586	9.44276e-10	0.999404	transcribed_unprocessed_pseudogene	TRUE
chr10	ENSG00000215146	cg24527560	rs35695462	BX322639.1	-0.196759	0.0327867	1.95896e-09	0.61728	transcribed_unprocessed_pseudogene	TRUE
chr10	ENSG00000215146	cg23026554	rs35695462	BX322639.1	-0.24756	0.0502994	8.57823e-07	0.405444	transcribed_unprocessed_pseudogene	TRUE
chr10	ENSG00000165863	cg15398400	rs3010455	C10orf82	1.25216	0.246019	3.5865e-07	0.489042	protein_coding	TRUE
chr10	ENSG00000183346	cg04438074	rs71490861	CABCOCO1	-0.246423	0.0383539	1.31887e-10	0.635582	protein_coding	TRUE
chr10	ENSG00000183346	cg11914795	rs71490861	CABCOCO1	-0.358792	0.0613376	4.93158e-09	0.142839	protein_coding	TRUE
chr10	ENSG00000151893	cg16722154	rs28820313	CACUL1	0.227851	0.0442757	2.65826e-07	0.826994	protein_coding	TRUE
chr10	ENSG00000165806	cg08245930	rs10553596	CASP7	0.0488228	0.00590543	1.36861e-16	0.334497	protein_coding	TRUE
chr10	ENSG00000169826	cg01289552	rs1864401	CSGALNACT2	-0.0724283	0.0116444	4.97116e-10	0.133199	protein_coding	TRUE
chr10	ENSG00000169826	cg03680517	rs4648314	CSGALNACT2	-0.0910109	0.0154475	3.82411e-09	0.19286	protein_coding	TRUE
chr10	ENSG00000169826	cg22757362	rs4648314	CSGALNACT2	-0.0933414	0.0171381	5.13876e-08	0.077441	protein_coding	TRUE
chr10	ENSG00000095485	cg02250046	rs17885645	CWF19L1	-0.109361	0.0172197	2.14015e-10	0.0615266	protein_coding	TRUE
chr10	ENSG00000095485	cg04359915	rs17885645	CWF19L1	-0.08873	0.0166195	9.35001e-08	0.0406353	protein_coding	FALSE
chr10	ENSG00000095485	cg20925178	rs17885645	CWF19L1	0.0561857	0.0110381	3.57725e-07	0.329202	protein_coding	TRUE
chr10	ENSG00000095485	cg11251234	rs17885645	CWF19L1	-0.079512	0.015702	4.10948e-07	0.0168783	protein_coding	FALSE
chr10	ENSG00000095485	cg19754520	rs17885645	CWF19L1	-0.0989351	0.01963	4.65564e-07	0.014466	protein_coding	FALSE
chr10	ENSG00000148795	cg17281126	rs7096475	CYP17A1	1.1115	0.196562	1.56102e-08	0.072231	protein_coding	TRUE
chr10	ENSG00000148795	cg05855489	rs7096475	CYP17A1	-1.25308	0.244358	2.92764e-07	0.669968	protein_coding	TRUE
chr10	ENSG00000148795	cg23093090	rs7096475	CYP17A1	0.492338	0.0979571	5.00669e-07	0.435485	protein_coding	TRUE
chr10	ENSG00000148795	cg11453585	rs7096475	CYP17A1	0.8537	0.170315	5.37374e-07	0.108943	protein_coding	TRUE
chr10	ENSG00000148795	cg08772003	rs7096475	CYP17A1	-0.861999	0.172886	6.16612e-07	0.428687	protein_coding	TRUE
chr10	ENSG00000148795	cg09135741	rs7096475	CYP17A1	0.59034	0.11965	8.06101e-07	0.154422	protein_coding	TRUE
chr10	ENSG00000138115	cg09036531	rs10882572	CYP2C8	-0.0738564	0.0136286	5.98644e-08	0.211313	protein_coding	TRUE
chr10	ENSG00000151208	cg02407266	rs10762765	DLG5	-0.0159335	0.00275397	7.22395e-09	0.893858	protein_coding	TRUE
chr10	ENSG00000151208	cg17075019	rs10762765	DLG5	-0.0161498	0.00293463	3.72994e-08	0.634835	protein_coding	TRUE
chr10	ENSG00000138346	cg24118715	rs10998223	DNA2	0.101544	0.0133442	2.74978e-14	0.0692804	protein_coding	TRUE
chr10	ENSG00000138346	cg06032048	rs10998223	DNA2	0.0579407	0.00972179	2.52417e-09	0.56456	protein_coding	TRUE
chr10	ENSG00000138346	cg08627624	rs10998223	DNA2	0.205975	0.0365018	1.67238e-08	0.00229799	protein_coding	FALSE
chr10	ENSG00000203791	cg26853045	rs1552345	EEF1AKMT2	-0.117705	0.0174746	1.6306e-11	0.000777674	protein_coding	FALSE
chr10	ENSG00000203791	cg04497547	rs1552345	EEF1AKMT2	-0.193132	0.0290476	2.95514e-11	0.00360895	protein_coding	FALSE
chr10	ENSG00000203791	cg04207413	rs1552345	EEF1AKMT2	-0.168438	0.025707	5.66844e-11	0.75197	protein_coding	TRUE
chr10	ENSG00000203791	cg23272266	rs1552345	EEF1AKMT2	-0.110312	0.0197005	2.15016e-08	0.200452	protein_coding	TRUE
chr10	ENSG00000203791	cg02469347	rs11245388	EEF1AKMT2	0.119639	0.0241964	7.63357e-07	0.0208604	protein_coding	FALSE
chr10	ENSG00000151553	cg23260525	rs11196934	FAM160B1	0.0844826	0.011454	1.6334e-13	0.860617	protein_coding	TRUE
chr10	ENSG00000151553	cg03647239	rs11196934	FAM160B1	-0.0283882	0.00546903	2.09488e-07	0.786655	protein_coding	TRUE
chr10	ENSG00000235618	cg04009799	rs60451660	FAM21EP	2.82696	0.475226	2.70341e-09	0.29653	transcribed_unprocessed_pseudogene	TRUE
chr10	ENSG00000148690	cg02868254	rs1998840	FRA10AC1	-0.054802	0.00819162	2.23149e-11	0.0831249	protein_coding	TRUE
chr10	ENSG00000148690	cg00057569	rs1998840	FRA10AC1	0.0421605	0.00664865	2.27957e-10	0.0890486	protein_coding	TRUE
chr10	ENSG00000148690	cg20715218	rs10736078	FRA10AC1	-0.064787	0.0118643	4.74316e-08	0.028238	protein_coding	FALSE
chr10	ENSG00000148690	cg06789550	rs10736078	FRA10AC1	-0.0687058	0.0127853	7.709e-08	0.0910124	protein_coding	TRUE
chr10	ENSG00000155265	cg01119231	rs4919146	GOLGA7B	-0.00808866	0.00138644	5.4078e-09	0.584985	protein_coding	TRUE
chr10	ENSG00000155265	cg07381930	rs4919146	GOLGA7B	-0.00461551	0.000863509	9.03844e-08	0.469642	protein_coding	TRUE
chr10	ENSG00000155265	cg08649179	rs4919146	GOLGA7B	-0.00387676	0.000773558	5.39785e-07	0.339736	protein_coding	TRUE
chr10	ENSG00000148834	cg23245945	rs10883990	GSTO1	-0.127933	0.0164022	6.20326e-15	0.199396	protein_coding	TRUE
chr10	ENSG00000148834	cg23659134	rs10883990	GSTO1	0.118294	0.0152243	7.84125e-15	0.0286676	protein_coding	FALSE
chr10	ENSG00000148834	cg23126571	rs10883990	GSTO1	-0.139859	0.0181513	1.30653e-14	0.526926	protein_coding	TRUE
chr10	ENSG00000148834	cg00646492	rs10883990	GSTO1	-0.118096	0.0163713	5.44928e-13	0.434669	protein_coding	TRUE
chr10	ENSG00000148834	cg06119461	rs10883990	GSTO1	-0.0932351	0.0131032	1.11538e-12	0.561961	protein_coding	TRUE
chr10	ENSG00000148834	cg19917656	rs10883990	GSTO1	0.100464	0.014134	1.17763e-12	0.0560108	protein_coding	TRUE
chr10	ENSG00000148834	cg17383262	rs10883990	GSTO1	0.0939106	0.0136567	6.13257e-12	0.00688872	protein_coding	FALSE
chr10	ENSG00000148834	cg17733466	rs10883990	GSTO1	0.0712481	0.0107173	2.9721e-11	0.0290947	protein_coding	FALSE
chr10	ENSG00000148834	cg00899160	rs10883990	GSTO1	0.0896836	0.0136108	4.42325e-11	0.066101	protein_coding	TRUE
chr10	ENSG00000148834	cg02733266	rs10883990	GSTO1	-0.101301	0.0156095	8.60026e-11	0.391676	protein_coding	TRUE
chr10	ENSG00000148834	cg10973038	rs10883990	GSTO1	-0.0765537	0.0124716	8.34365e-10	0.124554	protein_coding	TRUE
chr10	ENSG00000148834	cg23487032	rs10883990	GSTO1	0.0788331	0.0136879	8.44514e-09	0.0163114	protein_coding	FALSE
chr10	ENSG00000148834	cg19038917	rs10883990	GSTO1	-0.0891503	0.0155025	8.88678e-09	0.319847	protein_coding	TRUE
chr10	ENSG00000148834	cg27293118	rs10883990	GSTO1	0.152097	0.0268152	1.41102e-08	0.0572136	protein_coding	TRUE
chr10	ENSG00000148834	cg24598761	rs10883990	GSTO1	-0.0538911	0.00957045	1.79182e-08	0.339085	protein_coding	TRUE
chr10	ENSG00000148834	cg02225485	rs10883990	GSTO1	-0.0904486	0.0162286	2.49826e-08	0.214061	protein_coding	TRUE
chr10	ENSG00000148834	cg13766030	rs10883990	GSTO1	0.0674789	0.0126445	9.46981e-08	0.0280045	protein_coding	FALSE
chr10	ENSG00000148834	cg13685156	rs10883990	GSTO1	-0.0690344	0.0130004	1.0952e-07	0.298579	protein_coding	TRUE
chr10	ENSG00000148834	cg23586589	rs10883990	GSTO1	-0.0739058	0.0139867	1.26398e-07	0.328562	protein_coding	TRUE
chr10	ENSG00000148834	cg24199006	rs10883991	GSTO1	-0.0601932	0.0120524	5.9054e-07	0.590423	protein_coding	TRUE
chr10	ENSG00000148834	cg00242936	rs10883990	GSTO1	-0.0599953	0.0121148	7.33694e-07	0.00046821	protein_coding	FALSE
chr10	ENSG00000065621	cg23659134	rs7099030	GSTO2	-0.113923	0.0182221	4.05538e-10	0.711482	protein_coding	TRUE
chr10	ENSG00000065621	cg17383262	rs7099030	GSTO2	-0.0964144	0.0158567	1.19899e-09	0.728258	protein_coding	TRUE
chr10	ENSG00000065621	cg19917656	rs7099030	GSTO2	-0.0931058	0.0161055	7.42546e-09	0.717137	protein_coding	TRUE
chr10	ENSG00000065621	cg17733466	rs7099030	GSTO2	-0.0691575	0.0120702	1.00661e-08	0.404246	protein_coding	TRUE
chr10	ENSG00000065621	cg00899160	rs7099030	GSTO2	-0.0816668	0.0150132	5.33753e-08	0.604064	protein_coding	TRUE
chr10	ENSG00000065621	cg23245945	rs7099030	GSTO2	0.0996982	0.0184475	6.50095e-08	0.0969507	protein_coding	TRUE
chr10	ENSG00000065621	cg23487032	rs7099030	GSTO2	-0.0792719	0.0148147	8.75111e-08	0.705411	protein_coding	TRUE
chr10	ENSG00000065621	cg23126571	rs7099030	GSTO2	0.105616	0.0201652	1.6274e-07	0.0876361	protein_coding	TRUE
chr10	ENSG00000065621	cg06119461	rs7099030	GSTO2	0.0730949	0.0142936	3.15677e-07	0.139989	protein_coding	TRUE
chr10	ENSG00000065621	cg10973038	rs7099030	GSTO2	0.0676723	0.0133477	3.97912e-07	0.517785	protein_coding	TRUE
chr10	ENSG00000065621	cg00646492	rs7099030	GSTO2	0.0901102	0.017828	4.31708e-07	0.0823754	protein_coding	TRUE
chr10	ENSG00000065621	cg13766030	rs7099030	GSTO2	-0.066614	0.0133183	5.68337e-07	0.772466	protein_coding	TRUE
chr10	ENSG00000166033	cg16466810	rs4991294	HTRA1	-0.0135791	0.0022753	2.40107e-09	0.650275	protein_coding	TRUE
chr10	ENSG00000166033	cg04970100	rs4991294	HTRA1	-0.0155257	0.00279374	2.73968e-08	0.823094	protein_coding	TRUE
chr10	ENSG00000166033	cg21647373	rs4991294	HTRA1	-0.0148384	0.00279178	1.06641e-07	0.335265	protein_coding	TRUE
chr10	ENSG00000232656	cg24515221	rs3750729	IDI2-AS1	0.38702	0.0474115	3.26817e-16	0.212294	lncRNA	TRUE
chr10	ENSG00000232656	cg17288694	rs11250244	IDI2-AS1	0.259867	0.0388832	2.33686e-11	0.10069	lncRNA	TRUE
chr10	ENSG00000232656	cg11799387	rs11250244	IDI2-AS1	-0.202964	0.0401282	4.23906e-07	0.205688	lncRNA	TRUE
chr10	ENSG00000185745	cg16395953	rs188591	IFIT1	-0.0816587	0.0107473	3.00665e-14	0.88305	protein_coding	TRUE
chr10	ENSG00000185745	cg05552874	rs188591	IFIT1	-0.089943	0.0122345	1.95857e-13	0.741106	protein_coding	TRUE
chr10	ENSG00000185745	cg11748577	rs188591	IFIT1	-0.0697801	0.00958792	3.39025e-13	0.738963	protein_coding	TRUE
chr10	ENSG00000185745	cg15019617	rs188591	IFIT1	-0.0667069	0.00939516	1.24636e-12	0.666615	protein_coding	TRUE
chr10	ENSG00000185745	cg01355957	rs188591	IFIT1	-0.0362978	0.00603743	1.83102e-09	0.409721	protein_coding	TRUE
chr10	ENSG00000185745	cg26974214	rs188591	IFIT1	-0.0373621	0.00629583	2.9488e-09	0.818197	protein_coding	TRUE
chr10	ENSG00000152778	cg16395953	rs304410	IFIT5	-0.179624	0.0220779	4.0882e-16	0.110571	protein_coding	TRUE
chr10	ENSG00000152778	cg11748577	rs304410	IFIT5	-0.163916	0.0201826	4.59951e-16	0.316164	protein_coding	TRUE
chr10	ENSG00000152778	cg05552874	rs304410	IFIT5	-0.20632	0.0256048	7.76219e-16	0.124364	protein_coding	TRUE
chr10	ENSG00000152778	cg15019617	rs304410	IFIT5	-0.153766	0.0199821	1.41274e-14	0.204751	protein_coding	TRUE
chr10	ENSG00000152778	cg01355957	rs304410	IFIT5	-0.0954825	0.0136588	2.73783e-12	0.587792	protein_coding	TRUE
chr10	ENSG00000152778	cg26974214	rs304410	IFIT5	-0.0838364	0.0142311	3.83722e-09	0.20301	protein_coding	TRUE
chr10	ENSG00000148841	cg00242936	rs11192018	ITPRIP	-0.114894	0.0219535	1.66306e-07	0.889704	protein_coding	TRUE
chr10	ENSG00000188385	cg02594345	rs7087871	JAKMIP3	-0.180988	0.0272262	2.97992e-11	0.0153603	protein_coding	FALSE
chr10	ENSG00000188385	cg25534226	rs7087871	JAKMIP3	-0.140695	0.0216039	7.39204e-11	0.0145103	protein_coding	FALSE
chr10	ENSG00000188385	cg27316088	rs7087871	JAKMIP3	-0.142384	0.023521	1.41743e-09	0.01433	protein_coding	FALSE
chr10	ENSG00000185904	cg27080085	rs1255411	LINC00839	-0.444121	0.0807197	3.75461e-08	0.0129649	lncRNA	FALSE
chr10	ENSG00000185904	cg23853165	rs61845567	LINC00839	0.809787	0.160263	4.35246e-07	0.0259685	lncRNA	FALSE
chr10	ENSG00000232903	cg15681295	rs11146066	LINC01166	-1.34621	0.267479	4.82982e-07	0.991398	lncRNA	TRUE
chr10	ENSG00000228065	cg18180105	rs74501402	LINC01515	0.10127	0.0195225	2.1329e-07	0.0158219	lncRNA	FALSE
chr10	ENSG00000204033	cg00169964	rs4562752	LRIT2	-0.010236	0.00187287	4.61859e-08	0.34065	protein_coding	TRUE
chr10	ENSG00000204033	cg16807687	rs4562752	LRIT2	-0.00949628	0.00187679	4.19586e-07	0.384308	protein_coding	TRUE
chr10	ENSG00000165406	cg14716689	rs1982796	MARCHF8	-0.0127461	0.00145098	1.57054e-18	0.0221074	protein_coding	FALSE
chr10	ENSG00000165406	cg27462740	rs1982796	MARCHF8	-0.00601432	0.000753937	1.49665e-15	0.00837802	protein_coding	FALSE
chr10	ENSG00000165406	cg01325993	rs1982796	MARCHF8	-0.00673435	0.000862352	5.75122e-15	0.111593	protein_coding	TRUE
chr10	ENSG00000165406	cg20177502	rs11239562	MARCHF8	-0.00982504	0.00132257	1.09611e-13	1.00279e-07	protein_coding	FALSE
chr10	ENSG00000165406	cg07111274	rs1982796	MARCHF8	-0.00556616	0.000800907	3.6574e-12	0.204097	protein_coding	TRUE
chr10	ENSG00000120539	cg14240646	rs7901653	MASTL	-0.959802	0.0852566	2.11993e-29	0.00368979	protein_coding	FALSE
chr10	ENSG00000120539	cg23656959	rs7901653	MASTL	-0.716183	0.0710955	7.2325e-24	0.000876864	protein_coding	FALSE
chr10	ENSG00000120539	cg15469871	rs7901653	MASTL	0.260994	0.0302062	5.60139e-18	0.00504603	protein_coding	FALSE
chr10	ENSG00000120539	cg03848129	rs7901653	MASTL	0.185487	0.0223334	9.95215e-17	0.0160132	protein_coding	FALSE
chr10	ENSG00000120539	cg26510160	rs7901653	MASTL	-0.235817	0.0298449	2.75726e-15	0.0014421	protein_coding	FALSE
chr10	ENSG00000120539	cg05886574	rs7901653	MASTL	-0.135814	0.0211765	1.42315e-10	0.0808403	protein_coding	TRUE
chr10	ENSG00000120539	cg24266872	rs66765649	MASTL	-0.125015	0.0223326	2.17006e-08	0.707275	protein_coding	TRUE
chr10	ENSG00000120539	cg00507135	rs7901653	MASTL	-0.101778	0.0202537	5.02973e-07	6.82178e-05	protein_coding	FALSE
chr10	ENSG00000138111	cg09118835	rs35597970	MFSD13A	0.118916	0.0170106	2.73561e-12	0.0470998	protein_coding	FALSE
chr10	ENSG00000138111	cg11453585	rs35597970	MFSD13A	0.129135	0.0193535	2.51657e-11	3.98577e-05	protein_coding	FALSE
chr10	ENSG00000138111	cg13349042	rs35597970	MFSD13A	-0.131222	0.0201197	6.93391e-11	0.00195658	protein_coding	FALSE
chr10	ENSG00000138111	cg02487842	rs35597970	MFSD13A	0.0680525	0.010474	8.17751e-11	0.00502252	protein_coding	FALSE
chr10	ENSG00000138111	cg09135741	rs35597970	MFSD13A	0.0871093	0.0138013	2.7606e-10	8.70604e-05	protein_coding	FALSE
chr10	ENSG00000138111	cg07787771	rs35597970	MFSD13A	-0.0906848	0.0163644	2.99725e-08	0.014242	protein_coding	FALSE
chr10	ENSG00000138111	cg13534796	rs35597970	MFSD13A	0.052089	0.0102195	3.45078e-07	0.538737	protein_coding	TRUE
chr10	ENSG00000138111	cg17281126	rs11591780	MFSD13A	0.114245	0.0229944	6.75162e-07	4.48522e-06	protein_coding	FALSE
chr10	ENSG00000107745	cg05678157	rs2921447	MICU1	0.11133	0.0158287	2.01533e-12	0.0548374	protein_coding	TRUE
chr10	ENSG00000107745	cg00699105	rs2921447	MICU1	-0.199975	0.0286209	2.8078e-12	0.0696976	protein_coding	TRUE
chr10	ENSG00000107745	cg06563472	rs2921447	MICU1	-0.119361	0.0234433	3.55298e-07	0.137352	protein_coding	TRUE
chr10	ENSG00000171160	cg17001106	rs35223596	MORN4	-0.108686	0.0173599	3.83114e-10	0.000954294	protein_coding	FALSE
chr10	ENSG00000150054	cg09294573	rs1249346	MPP7	-0.0498202	0.00903585	3.51544e-08	0.0063825	protein_coding	FALSE
chr10	ENSG00000138119	cg11840849	rs788100	MYOF	0.046477	0.00830482	2.18867e-08	0.577649	protein_coding	TRUE
chr10	ENSG00000188613	cg14916079	rs494469	NANOS1	-0.20573	0.0341409	1.68162e-09	0.17667	protein_coding	TRUE
chr10	ENSG00000188613	cg00853148	rs494469	NANOS1	-0.140409	0.0253152	2.91594e-08	0.154187	protein_coding	TRUE
chr10	ENSG00000173145	cg07270175	rs12781451	NOC3L	0.113436	0.0171906	4.14789e-11	0.518371	protein_coding	TRUE
chr10	ENSG00000173145	cg08923894	rs12781451	NOC3L	-0.161082	0.0258597	4.69214e-10	0.38475	protein_coding	TRUE
chr10	ENSG00000173145	cg07889765	rs12783744	NOC3L	-0.134161	0.0233873	9.66659e-09	0.000118268	protein_coding	FALSE
chr10	ENSG00000173145	ch.10.1999173F	rs12775991	NOC3L	0.106341	0.0208696	3.47778e-07	0.234704	protein_coding	TRUE
chr10	ENSG00000241058	cg16338816	rs12357594	NSUN6	-0.0813507	0.0142033	1.0186e-08	0.141202	protein_coding	TRUE
chr10	ENSG00000166321	cg01701415	rs200923176	NUDT13	-0.512666	0.0975902	1.49436e-07	0.53362	protein_coding	TRUE
chr10	ENSG00000166321	cg12312308	rs200923176	NUDT13	-0.359355	0.0720253	6.06012e-07	0.753158	protein_coding	TRUE
chr10	ENSG00000065154	cg10140171	rs2674347	OAT	0.0719	0.0088447	4.32276e-16	0.0749234	protein_coding	TRUE
chr10	ENSG00000065154	cg03853151	rs2674347	OAT	0.0271403	0.00428772	2.45495e-10	0.496557	protein_coding	TRUE
chr10	ENSG00000065154	cg16933922	rs2674347	OAT	-0.0611147	0.0106031	8.22205e-09	0.227863	protein_coding	TRUE
chr10	ENSG00000065154	cg02693002	rs2674347	OAT	-0.0376596	0.00736776	3.19768e-07	0.715609	protein_coding	TRUE
chr10	ENSG00000108187	cg08627624	rs113796090	PBLD	-0.595752	0.0912947	6.77334e-11	0.655051	protein_coding	TRUE
chr10	ENSG00000166228	cg07409741	rs2854614	PCBD1	-0.186979	0.0316643	3.52568e-09	0.307685	protein_coding	TRUE
chr10	ENSG00000166228	cg21324555	rs2854614	PCBD1	0.259019	0.0452528	1.04148e-08	0.23534	protein_coding	TRUE
chr10	ENSG00000166228	cg19225512	rs2854614	PCBD1	0.175273	0.0337029	1.98712e-07	0.374722	protein_coding	TRUE
chr10	ENSG00000067057	cg14068301	rs73575016	PFKP	-0.0258366	0.00462702	2.35243e-08	0.209194	protein_coding	TRUE
chr10	ENSG00000107537	cg19018267	rs1058596	PHYH	-0.246479	0.0363724	1.23089e-11	0.00426897	protein_coding	FALSE
chr10	ENSG00000155252	cg07307583	rs118141419	PI4K2A	-0.168999	0.0229302	1.70452e-13	0.124072	protein_coding	TRUE
chr10	ENSG00000237399	cg08713344	rs3816712	PITRM1-AS1	0.237286	0.0445303	9.89476e-08	0.000605901	lncRNA	FALSE
chr10	ENSG00000237399	cg18474443	rs3816712	PITRM1-AS1	-0.24671	0.0467675	1.32581e-07	0.0181252	lncRNA	FALSE
chr10	ENSG00000237399	cg00735188	rs3816712	PITRM1-AS1	-0.129361	0.0260032	6.53101e-07	0.00626757	lncRNA	FALSE
chr10	ENSG00000120594	cg07534516	rs6482066	PLXDC2	-0.0116648	0.00122683	1.94315e-21	0.169138	protein_coding	TRUE
chr10	ENSG00000120594	cg27401333	rs6482066	PLXDC2	-0.0111577	0.00138266	7.04691e-16	0.122713	protein_coding	TRUE
chr10	ENSG00000120594	cg14024017	rs6482066	PLXDC2	-0.00886938	0.00114432	9.13473e-15	0.251064	protein_coding	TRUE
chr10	ENSG00000120594	cg20503282	rs6482066	PLXDC2	-0.0063296	0.000862331	2.1342e-13	0.0273793	protein_coding	FALSE
chr10	ENSG00000120594	cg12723985	rs6482066	PLXDC2	-0.00806253	0.00110206	2.55725e-13	0.251556	protein_coding	TRUE
chr10	ENSG00000120594	cg03898108	rs6482066	PLXDC2	-0.00736912	0.00102249	5.7187e-13	0.301635	protein_coding	TRUE
chr10	ENSG00000120594	cg15657225	rs6482066	PLXDC2	0.00347872	0.00049506	2.11213e-12	0.0941345	protein_coding	TRUE
chr10	ENSG00000120594	cg02536263	rs6482066	PLXDC2	-0.00886938	0.00127114	3.00481e-12	0.0300926	protein_coding	FALSE
chr10	ENSG00000120594	cg05886789	rs6482066	PLXDC2	-0.00769569	0.00118116	7.25019e-11	0.0399355	protein_coding	FALSE
chr10	ENSG00000120594	cg03631457	rs6482066	PLXDC2	-0.00697804	0.00110428	2.63116e-10	0.308269	protein_coding	TRUE
chr10	ENSG00000119973	cg23973591	rs10886294	PRLHR	-1.2611	0.250028	4.56274e-07	0.639702	protein_coding	TRUE
chr10	ENSG00000119973	cg03567706	rs10886294	PRLHR	-1.74251	0.354302	8.73667e-07	0.810181	protein_coding	TRUE
chr10	ENSG00000197746	cg09726879	rs74673782	PSAP	-0.00342604	0.0006071	1.66839e-08	0.00607206	protein_coding	FALSE
chr10	ENSG00000119943	cg26690318	rs10883083	PYROXD2	-2.95566	0.413819	9.17105e-13	0.0373539	protein_coding	FALSE
chr10	ENSG00000119943	cg22905282	rs10883083	PYROXD2	-0.431224	0.0700967	7.65877e-10	0.384738	protein_coding	TRUE
chr10	ENSG00000165731	cg01289552	rs1864401	RET	0.0831243	0.0158238	1.49541e-07	0.811887	protein_coding	TRUE
chr10	ENSG00000165731	cg23042076	rs1864401	RET	0.0576468	0.0112682	3.12239e-07	0.916277	protein_coding	TRUE
chr10	ENSG00000148604	cg13133883	rs10736319	RGR	-0.00265027	0.000475713	2.53052e-08	0.41507	protein_coding	TRUE
chr10	ENSG00000072422	cg23892626	rs16915675	RHOBTB1	-0.0811418	0.0137252	3.38255e-09	0.176433	protein_coding	TRUE
chr10	ENSG00000072422	cg11650479	rs16915675	RHOBTB1	-0.0228317	0.00418009	4.70774e-08	0.330511	protein_coding	TRUE
chr10	ENSG00000072422	cg24836845	rs16915675	RHOBTB1	-0.0293888	0.00553586	1.10344e-07	0.640876	protein_coding	TRUE
chr10	ENSG00000079332	cg01240734	rs10999158	SAR1A	-0.113639	0.0197944	9.41274e-09	0.212103	protein_coding	TRUE
chr10	ENSG00000079332	cg15661580	rs10999158	SAR1A	-0.0676901	0.0130736	2.24729e-07	0.070419	protein_coding	TRUE
chr10	ENSG00000214279	cg09435798	rs57719627	SCART1	-0.423178	0.0844155	5.35774e-07	0.71403	protein_coding	TRUE
chr10	ENSG00000214279	cg13587533	rs57719627	SCART1	-0.517122	0.104814	8.06785e-07	0.638558	protein_coding	TRUE
chr10	ENSG00000075826	cg13084299	rs11190601	SEC31B	-0.0870665	0.0136431	1.75093e-10	0.855442	protein_coding	TRUE
chr10	ENSG00000156398	cg13349042	rs12762176	SFXN2	0.249157	0.0313044	1.73187e-15	0.923365	protein_coding	TRUE
chr10	ENSG00000156398	cg05855489	rs12762176	SFXN2	0.250317	0.0406048	7.06074e-10	0.0449612	protein_coding	FALSE
chr10	ENSG00000156398	cg23093090	rs12762176	SFXN2	-0.0807651	0.0160496	4.84845e-07	0.00712771	protein_coding	FALSE
chr10	ENSG00000156398	cg09135741	rs12762176	SFXN2	-0.0973713	0.0197463	8.17606e-07	0.00337812	protein_coding	FALSE
chr10	ENSG00000198964	cg14611218	rs10508930	SGMS1	-0.103397	0.00883726	1.2733e-31	0.109626	protein_coding	TRUE
chr10	ENSG00000198964	cg03585110	rs10508930	SGMS1	-0.101011	0.00955545	4.05763e-26	0.182982	protein_coding	TRUE
chr10	ENSG00000198964	cg07494431	rs10508930	SGMS1	-0.0744395	0.00740204	8.58951e-24	0.136503	protein_coding	TRUE
chr10	ENSG00000198964	cg13784163	rs10508930	SGMS1	-0.0556455	0.00610516	7.90398e-20	0.152102	protein_coding	TRUE
chr10	ENSG00000198964	cg22388374	rs10508930	SGMS1	-0.0383631	0.0043422	1.00155e-18	0.0703718	protein_coding	TRUE
chr10	ENSG00000198964	cg11764846	rs10508930	SGMS1	-0.0619956	0.00706659	1.73882e-18	0.204137	protein_coding	TRUE
chr10	ENSG00000198964	cg13382516	rs10508930	SGMS1	-0.0427821	0.00498368	9.12885e-18	0.224517	protein_coding	TRUE
chr10	ENSG00000198964	cg17569303	rs10508930	SGMS1	-0.0673995	0.00793533	2.00337e-17	0.0195316	protein_coding	FALSE
chr10	ENSG00000198964	cg15678767	rs10508930	SGMS1	-0.0507086	0.00609995	9.33537e-17	0.324342	protein_coding	TRUE
chr10	ENSG00000198964	cg08363235	rs10508930	SGMS1	-0.0523193	0.00646399	5.77577e-16	0.278436	protein_coding	TRUE
chr10	ENSG00000198964	cg24037270	rs10508930	SGMS1	-0.045444	0.00602828	4.75506e-14	0.171555	protein_coding	TRUE
chr10	ENSG00000198964	cg20014988	rs10508930	SGMS1	-0.0308285	0.00423181	3.21807e-13	0.302432	protein_coding	TRUE
chr10	ENSG00000198964	cg00168459	rs10508930	SGMS1	-0.0324091	0.00476716	1.05777e-11	0.31714	protein_coding	TRUE
chr10	ENSG00000198964	cg00453368	rs10508930	SGMS1	-0.0298116	0.00452214	4.32898e-11	0.175753	protein_coding	TRUE
chr10	ENSG00000198964	cg10188795	rs10508930	SGMS1	-0.0362128	0.00565153	1.47813e-10	0.319488	protein_coding	TRUE
chr10	ENSG00000198964	cg17673495	rs10508930	SGMS1	-0.02097	0.00329029	1.84997e-10	0.852327	protein_coding	TRUE
chr10	ENSG00000198964	cg00936935	rs10508930	SGMS1	-0.0259636	0.00407952	1.96081e-10	0.0640385	protein_coding	TRUE
chr10	ENSG00000198964	cg05102856	rs10508930	SGMS1	-0.0268535	0.00456583	4.06798e-09	0.36675	protein_coding	TRUE
chr10	ENSG00000198964	cg23518556	rs10508930	SGMS1	-0.0278179	0.00511102	5.24707e-08	0.00711967	protein_coding	FALSE
chr10	ENSG00000198964	cg11637084	rs11006119	SGMS1	-0.380107	0.0716637	1.1327e-07	1.34231e-06	protein_coding	FALSE
chr10	ENSG00000198964	cg08557120	rs10508930	SGMS1	-0.022561	0.00430791	1.63102e-07	0.205865	protein_coding	TRUE
chr10	ENSG00000226200	cg02249577	rs56138205	SGMS1-AS1	-0.591911	0.116195	3.50355e-07	0.0920323	lncRNA	TRUE
chr10	ENSG00000122376	cg27642528	rs34934124	SHLD2	-0.0837075	0.0116756	7.53101e-13	0.869271	protein_coding	TRUE
chr10	ENSG00000122376	cg00897409	rs34934124	SHLD2	-0.0496583	0.00898156	3.22207e-08	0.458549	protein_coding	TRUE
chr10	ENSG00000122912	cg24118715	rs150918137	SLC25A16	-0.0382324	0.00690168	3.03207e-08	0.00246814	protein_coding	FALSE
chr10	ENSG00000122912	cg08627624	rs150918137	SLC25A16	-0.0974221	0.0190464	3.13746e-07	4.75535e-05	protein_coding	FALSE
chr10	ENSG00000148482	cg07544152	rs690759	SLC39A12	-0.0519213	0.0086722	2.13621e-09	0.529279	protein_coding	TRUE
chr10	ENSG00000108064	cg10345341	rs1049432	TFAM	-0.264329	0.0446921	3.32975e-09	0.0701633	protein_coding	TRUE
chr10	ENSG00000187783	cg18881489	rs7909074	TMEM72	0.59308	0.108306	4.35179e-08	0.00149432	protein_coding	FALSE
chr10	ENSG00000187783	cg12303521	rs7074794	TMEM72	-0.657946	0.127764	2.60925e-07	0.42425	protein_coding	TRUE
chr10	ENSG00000187783	cg06200789	rs7909074	TMEM72	0.805803	0.15898	4.00809e-07	0.000992262	protein_coding	FALSE
chr10	ENSG00000187783	cg05187965	rs7074794	TMEM72	-0.990222	0.200844	8.21046e-07	0.432748	protein_coding	TRUE
chr10	ENSG00000224812	cg26040874	rs10900143	TMEM72-AS1	-0.48373	0.0824004	4.34539e-09	0.114695	lncRNA	TRUE
chr10	ENSG00000224812	cg23023914	rs10900143	TMEM72-AS1	-0.658455	0.120055	4.1437e-08	0.0420379	lncRNA	FALSE
chr10	ENSG00000224812	cg26002437	rs10900140	TMEM72-AS1	-0.496322	0.0946342	1.56587e-07		lncRNA	FALSE
chr10	ENSG00000107854	cg24165102	rs1417254	TNKS2	-0.043636	0.00777945	2.03338e-08	0.196901	protein_coding	TRUE
chr10	ENSG00000062650	cg01261775	rs11202040	WAPL	-0.0157784	0.00115247	1.14934e-42	0.72502	protein_coding	TRUE
chr10	ENSG00000062650	cg01327260	rs11202040	WAPL	-0.0140505	0.00114834	2.00744e-34	0.411127	protein_coding	TRUE
chr10	ENSG00000062650	cg07094302	rs11202040	WAPL	-0.00775791	0.000676235	1.81972e-30	0.527206	protein_coding	TRUE
chr10	ENSG00000062650	cg11737230	rs11202040	WAPL	-0.00418257	0.000368874	8.43333e-30	0.121854	protein_coding	TRUE
chr10	ENSG00000062650	cg19396074	rs11202040	WAPL	-0.00766419	0.000693799	2.27417e-28	0.477475	protein_coding	TRUE
chr10	ENSG00000062650	cg18461950	rs11202040	WAPL	0.00358237	0.000570107	3.3065e-10	0.000939347	protein_coding	FALSE
chr10	ENSG00000062650	cg12309176	rs11202040	WAPL	-0.00285857	0.000463278	6.81555e-10	0.210594	protein_coding	TRUE
chr10	ENSG00000062650	cg24440206	rs11202040	WAPL	0.00179688	0.000297563	1.55417e-09	0.00258285	protein_coding	FALSE
chr10	ENSG00000062650	cg07322936	rs1075539	WAPL	-0.00415334	0.000702588	3.39023e-09	0.00104737	protein_coding	FALSE
chr10	ENSG00000062650	cg26572361	rs11202040	WAPL	-0.00233282	0.000399993	5.47159e-09	0.0803153	protein_coding	TRUE
chr10	ENSG00000062650	cg04093065	rs11202040	WAPL	-0.00163261	0.000290277	1.86263e-08	0.214107	protein_coding	TRUE
chr10	ENSG00000172661	cg14716689	rs10793625	WASHC2C	0.0697235	0.0104226	2.23716e-11	0.248268	protein_coding	TRUE
chr10	ENSG00000172661	cg27462740	rs10793625	WASHC2C	0.034526	0.00525797	5.15435e-11	0.470578	protein_coding	TRUE
chr10	ENSG00000172661	cg01325993	rs10793625	WASHC2C	0.0354483	0.00590948	1.99094e-09	0.265668	protein_coding	TRUE
chr10	ENSG00000172661	cg07111274	rs10793625	WASHC2C	0.0300115	0.00530803	1.56777e-08	0.455472	protein_coding	TRUE
chr10	ENSG00000120008	cg14149699	rs11395714	WDR11	-0.0449881	0.00465236	4.04561e-22	0.0896844	protein_coding	TRUE
chr10	ENSG00000120008	cg24120153	rs11395714	WDR11	-0.0359014	0.00671195	8.84975e-08	0.000672136	protein_coding	FALSE
chr10	ENSG00000120008	cg00600684	rs10788125	WDR11	-0.0345162	0.00665659	2.15706e-07	0.477894	protein_coding	TRUE
chr10	ENSG00000227165	cg24120153	rs10886785	WDR11-AS1	-1.09768	0.150637	3.17117e-13	0.413431	lncRNA	TRUE
chr10	ENSG00000227165	cg13596132	rs10886785	WDR11-AS1	-0.672261	0.102761	6.06977e-11	0.591213	lncRNA	TRUE
chr10	ENSG00000227165	cg00600684	rs10886785	WDR11-AS1	-0.531956	0.105899	5.08061e-07	0.474835	lncRNA	TRUE
chr11	ENSG00000271758	cg21433768	rs7926492	AC044810.3	0.0883857	0.0164092	7.19091e-08	0.410067	lncRNA	TRUE
chr11	ENSG00000271758	cg09053419	rs7926492	AC044810.3	0.0625737	0.0121653	2.69476e-07	0.318862	lncRNA	TRUE
chr11	ENSG00000279675	cg03818576	rs998447	AC080100.1	-0.35959	0.0574399	3.84299e-10	0.958383	TEC	TRUE
chr11	ENSG00000279675	cg26553513	rs998447	AC080100.1	-0.302199	0.0551364	4.2308e-08	0.544854	TEC	TRUE
chr11	ENSG00000110455	cg00452199	rs2074038	ACCS	-0.209824	0.0161438	1.26962e-38	0.650223	protein_coding	TRUE
chr11	ENSG00000110455	cg20240860	rs2074038	ACCS	-0.166599	0.0131514	8.92496e-37	0.489945	protein_coding	TRUE
chr11	ENSG00000110455	cg09339476	rs2074038	ACCS	-0.176115	0.0144805	4.93792e-34	0.915525	protein_coding	TRUE
chr11	ENSG00000110455	cg04074835	rs2074038	ACCS	-0.119515	0.011001	1.71093e-27	0.463456	protein_coding	TRUE
chr11	ENSG00000110455	cg18265608	rs2074038	ACCS	-0.124853	0.0124512	1.1548e-23	0.910132	protein_coding	TRUE
chr11	ENSG00000110455	cg16963683	rs2074038	ACCS	-0.136758	0.0138376	4.93152e-23	0.398913	protein_coding	TRUE
chr11	ENSG00000110455	cg15894661	rs2074038	ACCS	-0.102604	0.010514	1.69087e-22	0.700578	protein_coding	TRUE
chr11	ENSG00000110455	cg12867237	rs2074038	ACCS	-0.160821	0.0170321	3.64938e-21	0.344352	protein_coding	TRUE
chr11	ENSG00000110455	cg11200965	rs2074038	ACCS	-0.123538	0.0139666	9.13024e-19	0.134923	protein_coding	TRUE
chr11	ENSG00000110455	cg12287025	rs2074038	ACCS	-0.130085	0.0154751	4.23746e-17	0.153234	protein_coding	TRUE
chr11	ENSG00000110455	cg16512570	rs2074038	ACCS	-0.101558	0.0120953	4.59897e-17	0.338604	protein_coding	TRUE
chr11	ENSG00000110455	cg08632680	rs2074038	ACCS	-0.126585	0.0187858	1.60234e-11	0.156516	protein_coding	TRUE
chr11	ENSG00000110455	cg10598066	rs2074038	ACCS	-0.144049	0.0220798	6.84653e-11	0.250348	protein_coding	TRUE
chr11	ENSG00000110455	cg03856109	rs2074038	ACCS	-0.0350136	0.00650328	7.2852e-08	0.0147836	protein_coding	FALSE
chr11	ENSG00000166452	cg15696082	rs34874636	AKIP1	0.646046	0.113496	1.25396e-08	0.379419	protein_coding	TRUE
chr11	ENSG00000166452	cg21881798	rs34874636	AKIP1	0.798295	0.142056	1.91404e-08	0.789729	protein_coding	TRUE
chr11	ENSG00000166452	cg00061907	rs34874636	AKIP1	0.358505	0.0682158	1.47655e-07	0.234237	protein_coding	TRUE
chr11	ENSG00000159063	cg26219287	rs4991879	ALG8	-0.944352	0.166069	1.29675e-08	0.344594	protein_coding	TRUE
chr11	ENSG00000159063	cg20281309	rs4991879	ALG8	-0.388341	0.0726053	8.86115e-08	0.649155	protein_coding	TRUE
chr11	ENSG00000159063	cg24744104	rs4991879	ALG8	-0.408835	0.0799908	3.20408e-07	0.629579	protein_coding	TRUE
chr11	ENSG00000159063	cg20267732	rs4991879	ALG8	-0.278938	0.0567539	8.88396e-07	0.23594	protein_coding	TRUE
chr11	ENSG00000133805	cg11734620	rs11042812	AMPD3	-0.0506793	0.00771183	4.97657e-11	0.039617	protein_coding	FALSE
chr11	ENSG00000133805	cg07329251	rs11042812	AMPD3	-0.0390121	0.00613077	1.97422e-10	0.596851	protein_coding	TRUE
chr11	ENSG00000133805	cg14763985	rs11042812	AMPD3	-0.0570933	0.00908171	3.24429e-10	0.0101914	protein_coding	FALSE
chr11	ENSG00000133805	cg26489413	rs11042812	AMPD3	-0.0334212	0.00607949	3.85512e-08	0.13525	protein_coding	TRUE
chr11	ENSG00000133805	cg12560076	rs11042812	AMPD3	-0.0355911	0.00655101	5.54403e-08	0.122696	protein_coding	TRUE
chr11	ENSG00000131620	cg05846633	rs12418573	ANO1	-0.178477	0.0315482	1.53787e-08	4.35305e-05	protein_coding	FALSE
chr11	ENSG00000171714	cg19639184	rs10833728	ANO5	0.17638	0.0229936	1.70859e-14	0.419396	protein_coding	TRUE
chr11	ENSG00000171714	cg27343150	rs10833728	ANO5	0.0837352	0.0119302	2.23843e-12	0.330659	protein_coding	TRUE
chr11	ENSG00000278879	cg12175146	rs12577614	AP000560.1	-0.688216	0.11715	4.23692e-09	0.00026772	TEC	FALSE
chr11	ENSG00000278879	cg10021803	rs550980	AP000560.1	-0.706644	0.122999	9.18531e-09	0.0749046	TEC	TRUE
chr11	ENSG00000254510	cg20110765	rs12785651	AP001107.5	-1.09171	0.166499	5.495e-11	0.00899709	lncRNA	FALSE
chr11	ENSG00000254510	cg24826102	rs12785651	AP001107.5	0.404317	0.0636791	2.16319e-10	0.176814	lncRNA	TRUE
chr11	ENSG00000254510	cg17066238	rs12785651	AP001107.5	-0.251127	0.0396538	2.40449e-10	0.0222004	lncRNA	FALSE
chr11	ENSG00000254510	cg00548822	rs12785651	AP001107.5	-0.326537	0.0520247	3.46103e-10	0.00383883	lncRNA	FALSE
chr11	ENSG00000254510	cg10122910	rs1892938	AP001107.5	-0.595562	0.120116	7.11377e-07	0.00831423	lncRNA	FALSE
chr11	ENSG00000254510	cg15082918	rs12785651	AP001107.5	-0.267049	0.0539986	7.59578e-07	0.557651	lncRNA	TRUE
chr11	ENSG00000255468	cg20110765	rs11823140	AP001107.9	-2.76821	0.499244	2.94301e-08	0.123741	lncRNA	TRUE
chr11	ENSG00000255468	cg17066238	rs11823140	AP001107.9	-0.64881	0.118208	4.04853e-08	0.212971	lncRNA	TRUE
chr11	ENSG00000255468	cg24826102	rs11823140	AP001107.9	0.991391	0.188279	1.3977e-07	0.544902	lncRNA	TRUE
chr11	ENSG00000255468	cg00548822	rs11823140	AP001107.9	-0.805011	0.153519	1.57365e-07	0.206172	lncRNA	TRUE
chr11	ENSG00000278989	cg12030550	rs670736	AP001148.1	-0.249593	0.0483576	2.45102e-07	0.490452	TEC	TRUE
chr11	ENSG00000241170	cg10021803	rs688665	AP001992.1	0.318285	0.0515566	6.67903e-10	0.0735815	transcribed_processed_pseudogene	TRUE
chr11	ENSG00000241170	cg12175146	rs2076980	AP001992.1	0.348699	0.0581853	2.06117e-09	0.000172882	transcribed_processed_pseudogene	FALSE
chr11	ENSG00000280367	cg05067963	rs3824897	AP002364.1	-0.852985	0.0895777	1.69415e-21	0.930645	TEC	TRUE
chr11	ENSG00000280367	cg26834418	rs3824897	AP002364.1	-0.863352	0.0907165	1.78188e-21	0.963061	TEC	TRUE
chr11	ENSG00000280367	cg22332266	rs3824897	AP002364.1	-0.880448	0.0951892	2.25648e-20	0.925698	TEC	TRUE
chr11	ENSG00000280367	cg26138821	rs3824897	AP002364.1	-0.638563	0.0710955	2.66451e-19	0.99515	TEC	TRUE
chr11	ENSG00000280367	cg04351018	rs3824897	AP002364.1	-0.488915	0.0596197	2.39279e-16	0.981562	TEC	TRUE
chr11	ENSG00000280367	cg26028595	rs3824897	AP002364.1	-0.271603	0.0343581	2.67775e-15	0.985039	TEC	TRUE
chr11	ENSG00000254682	cg05963690	rs909217	AP002387.1	0.593059	0.0748135	2.242e-15	0.257356	lncRNA	TRUE
chr11	ENSG00000254682	cg01630362	rs909217	AP002387.1	0.368039	0.0537402	7.46332e-12	0.376305	lncRNA	TRUE
chr11	ENSG00000254682	cg25623977	rs909217	AP002387.1	0.391722	0.0592521	3.81437e-11	0.269725	lncRNA	TRUE
chr11	ENSG00000254682	cg04003658	rs909217	AP002387.1	0.326403	0.0520234	3.51557e-10	0.912452	lncRNA	TRUE
chr11	ENSG00000254682	cg05163923	rs909217	AP002387.1	0.163956	0.0291734	1.90914e-08	0.712535	lncRNA	TRUE
chr11	ENSG00000254682	cg12467833	rs909217	AP002387.1	0.242737	0.0449383	6.60679e-08	0.0264766	lncRNA	FALSE
chr11	ENSG00000255517	cg10122910	rs2444846	AP002748.4	-3.69823	0.746068	7.16048e-07	0.0156771	lncRNA	FALSE
chr11	ENSG00000254614	cg25363789	rs6591178	AP003068.2	-0.4683	0.0655035	8.726e-13	0.25446	lncRNA	TRUE
chr11	ENSG00000255119	cg18464296	rs3765088	AP003385.3	-0.0829144	0.00821685	6.06845e-24	0.751465	lncRNA	TRUE
chr11	ENSG00000255119	cg25135322	rs3765088	AP003385.3	-0.115025	0.0120883	1.81026e-21	0.279446	lncRNA	TRUE
chr11	ENSG00000255119	cg25866895	rs3765088	AP003385.3	-0.100248	0.0112667	5.6998e-19	0.155671	lncRNA	TRUE
chr11	ENSG00000255119	cg00864171	rs3765088	AP003385.3	0.105977	0.0120255	1.22161e-18	0.0718519	lncRNA	TRUE
chr11	ENSG00000255119	cg20362170	rs3765088	AP003385.3	-0.120921	0.0140734	8.53254e-18	0.0762891	lncRNA	TRUE
chr11	ENSG00000255119	cg23188684	rs3765088	AP003385.3	0.0827938	0.00995495	9.03307e-17	0.0231406	lncRNA	FALSE
chr11	ENSG00000255119	cg00290607	rs3765088	AP003385.3	0.0888021	0.0107975	1.96348e-16	0.123197	lncRNA	TRUE
chr11	ENSG00000255119	cg05244766	rs3765088	AP003385.3	-0.101974	0.012422	2.22785e-16	0.0853613	lncRNA	TRUE
chr11	ENSG00000255119	cg23725454	rs3765088	AP003385.3	-0.0982416	0.0124975	3.81316e-15	0.572416	lncRNA	TRUE
chr11	ENSG00000255119	cg24690094	rs3765088	AP003385.3	0.1167	0.0148598	4.04883e-15	0.2943	lncRNA	TRUE
chr11	ENSG00000255119	cg08355456	rs3765088	AP003385.3	0.0544342	0.0073115	9.69431e-14	0.00356308	lncRNA	FALSE
chr11	ENSG00000255119	cg17020635	rs3765088	AP003385.3	-0.0621466	0.00846047	2.04956e-13	0.124788	lncRNA	TRUE
chr11	ENSG00000255119	cg07493922	rs3765088	AP003385.3	-0.0543672	0.00754383	5.72647e-13	0.51641	lncRNA	TRUE
chr11	ENSG00000255119	cg14500267	rs3765088	AP003385.3	0.0505391	0.00769204	5.0212e-11	0.0503839	lncRNA	TRUE
chr11	ENSG00000255119	cg11566244	rs3765088	AP003385.3	-0.0479907	0.00838419	1.04074e-08	0.0176345	lncRNA	FALSE
chr11	ENSG00000255119	cg09062970	rs3765088	AP003385.3	-0.0344165	0.00618463	2.62397e-08	0.0608369	lncRNA	TRUE
chr11	ENSG00000255119	cg22224704	rs3765088	AP003385.3	-0.026425	0.00499579	1.22682e-07	0.475397	lncRNA	TRUE
chr11	ENSG00000255119	cg21660623	rs3765088	AP003385.3	-0.0312165	0.00595209	1.56599e-07	0.189622	lncRNA	TRUE
chr11	ENSG00000255119	cg03603279	rs3765088	AP003385.3	-0.0385693	0.00740991	1.93893e-07	0.00367359	lncRNA	FALSE
chr11	ENSG00000255119	cg00636119	rs3765088	AP003385.3	0.028716	0.00566074	3.91916e-07	0.0195467	lncRNA	FALSE
chr11	ENSG00000255455	cg11721015	rs143461767	AP003486.1	0.0482676	0.00629123	1.69049e-14	0.196222	lncRNA	TRUE
chr11	ENSG00000255455	cg12179176	rs11222371	AP003486.1	-0.218411	0.0301008	3.98795e-13	0.0297377	lncRNA	FALSE
chr11	ENSG00000255455	cg05962950	rs11222371	AP003486.1	-0.30919	0.0439564	2.00666e-12	0.0964311	lncRNA	TRUE
chr11	ENSG00000255455	cg23642342	rs11222371	AP003486.1	-0.0991769	0.0163133	1.20537e-09	0.0711701	lncRNA	TRUE
chr11	ENSG00000255455	cg04608907	rs143461767	AP003486.1	0.0331311	0.00548867	1.57712e-09	0.670743	lncRNA	TRUE
chr11	ENSG00000255455	cg09137382	rs11222371	AP003486.1	-0.0473978	0.00956463	7.21354e-07	0.204759	lncRNA	TRUE
chr11	ENSG00000278376	cg09072408	rs61901411	AP004609.3	-0.272393	0.0300153	1.13535e-19	0.768095	lncRNA	TRUE
chr11	ENSG00000278376	cg10706802	rs61901411	AP004609.3	-0.233307	0.033336	2.58444e-12	0.413806	lncRNA	TRUE
chr11	ENSG00000278376	cg22253036	rs61901411	AP004609.3	-0.146548	0.0211837	4.58289e-12	0.585741	lncRNA	TRUE
chr11	ENSG00000278376	cg22992967	rs61901411	AP004609.3	-0.123543	0.018814	5.15036e-11	0.729393	lncRNA	TRUE
chr11	ENSG00000255284	cg01741372	rs4963156	AP006621.3	0.933898	0.103674	2.09728e-19	0.822152	lncRNA	TRUE
chr11	ENSG00000255284	cg13353733	rs4963156	AP006621.3	-0.361146	0.0460407	4.36197e-15	0.0457578	lncRNA	FALSE
chr11	ENSG00000255284	cg07279715	rs4963156	AP006621.3	-0.345202	0.0473939	3.2483e-13	0.0596029	lncRNA	TRUE
chr11	ENSG00000255284	cg09332835	rs4963156	AP006621.3	0.382897	0.0538988	1.212e-12	0.943069	lncRNA	TRUE
chr11	ENSG00000255284	cg20225915	rs4963156	AP006621.3	-0.377097	0.0651874	7.25964e-09	0.141	lncRNA	TRUE
chr11	ENSG00000255284	cg18089519	rs4963156	AP006621.3	0.433072	0.076535	1.52717e-08	0.0162796	lncRNA	FALSE
chr11	ENSG00000279672	cg01741372	rs7104929	AP006621.5	0.595475	0.0522375	4.21109e-30	0.170676	TEC	TRUE
chr11	ENSG00000279672	cg13353733	rs7104929	AP006621.5	-0.224982	0.0251762	4.02511e-19	0.0345566	TEC	FALSE
chr11	ENSG00000279672	cg07279715	rs7104929	AP006621.5	-0.213143	0.0267077	1.45657e-15	0.0993092	TEC	TRUE
chr11	ENSG00000279672	cg09332835	rs7104929	AP006621.5	0.23709	0.0306045	9.4153e-15	0.537257	TEC	TRUE
chr11	ENSG00000279672	cg20225915	rs7104929	AP006621.5	-0.259654	0.0383779	1.32637e-11	0.0958139	TEC	TRUE
chr11	ENSG00000279672	cg18089519	rs7104929	AP006621.5	0.280951	0.0456489	7.52652e-10	0.00663364	TEC	FALSE
chr11	ENSG00000279672	cg17628894	rs7104929	AP006621.5	-0.0974601	0.019389	4.9934e-07	0.0176877	TEC	FALSE
chr11	ENSG00000279672	cg10504333	rs7104929	AP006621.5	-0.142108	0.0282948	5.10231e-07	0.200609	TEC	TRUE
chr11	ENSG00000279672	cg23297433	rs7104929	AP006621.5	-0.154745	0.0309767	5.86728e-07	0.0120797	TEC	FALSE
chr11	ENSG00000279672	cg00185839	rs11246313	AP006621.5	-0.137531	0.0279423	8.56824e-07	0.729861	TEC	TRUE
chr11	ENSG00000254470	cg19309054	rs561924	AP5B1	-0.850282	0.146258	6.11508e-09	0.205925	protein_coding	TRUE
chr11	ENSG00000149089	cg06937548	rs2956103	APIP	0.0405376	0.00656328	6.55708e-10	0.0616124	protein_coding	TRUE
chr11	ENSG00000149089	cg19536085	rs2956103	APIP	-0.103115	0.0167035	6.69013e-10	0.0396551	protein_coding	FALSE
chr11	ENSG00000149089	cg25948180	rs16926448	APIP	-0.0382252	0.00698251	4.38946e-08	0.385939	protein_coding	TRUE
chr11	ENSG00000149089	cg22717608	rs16926448	APIP	-0.0607364	0.0113887	9.65812e-08	0.51706	protein_coding	TRUE
chr11	ENSG00000149089	cg03305906	rs2163377	APIP	0.0336172	0.00653686	2.70805e-07	8.1424e-11	protein_coding	FALSE
chr11	ENSG00000149089	cg11058730	rs3852516	APIP	-0.0211881	0.00412899	2.87367e-07	7.46063e-07	protein_coding	FALSE
chr11	ENSG00000149089	cg22595188	rs3852516	APIP	0.0162347	0.00319937	3.88842e-07	1.39083e-05	protein_coding	FALSE
chr11	ENSG00000149089	cg02333667	rs16926448	APIP	-0.0317759	0.00641131	7.18724e-07	0.466465	protein_coding	TRUE
chr11	ENSG00000149089	cg09194750	rs16926448	APIP	-0.0197055	0.00401231	9.04928e-07	0.978459	protein_coding	TRUE
chr11	ENSG00000162174	cg06239285	rs2513037	ASRGL1	-0.0417012	0.00593843	2.18308e-12	0.000201561	protein_coding	FALSE
chr11	ENSG00000184743	cg17783117	rs111756056	ATL3	-0.169947	0.023432	4.08292e-13	0.229326	protein_coding	TRUE
chr11	ENSG00000149311	cg19819206	rs112192271	ATM	0.111324	0.0215534	2.40378e-07	0.484158	protein_coding	TRUE
chr11	ENSG00000197580	cg05297139	rs56475786	BCO2	-0.0235351	0.00379041	5.32888e-10	1.24038e-05	protein_coding	FALSE
chr11	ENSG00000197580	cg07219264	rs56475786	BCO2	0.0122785	0.00239898	3.08442e-07	0.0102827	protein_coding	FALSE
chr11	ENSG00000167995	cg20584555	rs972355	BEST1	-0.102634	0.00951155	3.82075e-27	0.673119	protein_coding	TRUE
chr11	ENSG00000167995	cg11562596	rs972355	BEST1	-0.121024	0.0113095	1.00588e-26	0.520817	protein_coding	TRUE
chr11	ENSG00000167995	cg05481452	rs972355	BEST1	-0.0959098	0.0093202	7.77445e-25	0.624247	protein_coding	TRUE
chr11	ENSG00000167995	cg06068935	rs972355	BEST1	-0.0803521	0.0082047	1.20165e-22	0.342823	protein_coding	TRUE
chr11	ENSG00000167995	cg15456821	rs972355	BEST1	-0.0494438	0.00598607	1.45899e-16	0.487059	protein_coding	TRUE
chr11	ENSG00000167995	cg23584647	rs972355	BEST1	-0.0248761	0.00328589	3.71563e-14	0.532145	protein_coding	TRUE
chr11	ENSG00000167995	cg24944820	rs972355	BEST1	0.0140578	0.00267386	1.46033e-07	0.429469	protein_coding	TRUE
chr11	ENSG00000167995	cg22892043	rs972355	BEST1	-0.0229779	0.00457228	5.02207e-07	0.718476	protein_coding	TRUE
chr11	ENSG00000182919	cg26570233	rs1284108	C11orf54	-0.0357966	0.00668899	8.71926e-08	0.405274	protein_coding	TRUE
chr11	ENSG00000182919	cg05543025	rs12283372	C11orf54	-0.426336	0.0853808	5.93411e-07	0.0385628	protein_coding	FALSE
chr11	ENSG00000184224	cg18464296	rs640777	C11orf72	-0.887883	0.109579	5.3761e-16	0.848897	lncRNA	TRUE
chr11	ENSG00000184224	cg25135322	rs640777	C11orf72	-1.2469	0.158376	3.46191e-15	0.407352	lncRNA	TRUE
chr11	ENSG00000184224	cg25866895	rs640777	C11orf72	-1.07822	0.144473	8.44682e-14	0.286854	lncRNA	TRUE
chr11	ENSG00000184224	cg00864171	rs640777	C11orf72	1.14669	0.153891	9.24448e-14	0.0313166	lncRNA	FALSE
chr11	ENSG00000184224	cg20362170	rs640777	C11orf72	-1.31553	0.178934	1.95163e-13	0.229274	lncRNA	TRUE
chr11	ENSG00000184224	cg23188684	rs640777	C11orf72	0.891806	0.125314	1.1065e-12	0.0106044	lncRNA	FALSE
chr11	ENSG00000184224	cg05244766	rs640777	C11orf72	-1.09842	0.155839	1.80949e-12	0.225106	lncRNA	TRUE
chr11	ENSG00000184224	cg23725454	rs640777	C11orf72	-1.0937	0.155646	2.11259e-12	0.561077	lncRNA	TRUE
chr11	ENSG00000184224	cg00290607	rs640777	C11orf72	0.931731	0.135137	5.39716e-12	0.144127	lncRNA	TRUE
chr11	ENSG00000184224	cg24690094	rs640777	C11orf72	1.22186	0.18384	3.00455e-11	0.349398	lncRNA	TRUE
chr11	ENSG00000184224	cg08355456	rs640777	C11orf72	0.588582	0.0896318	5.14547e-11	0.000608168	lncRNA	FALSE
chr11	ENSG00000184224	cg17020635	rs640777	C11orf72	-0.651452	0.103115	2.65454e-10	0.271841	lncRNA	TRUE
chr11	ENSG00000184224	cg07493922	rs640777	C11orf72	-0.567063	0.0915348	5.8262e-10	0.516152	lncRNA	TRUE
chr11	ENSG00000184224	cg14500267	rs640777	C11orf72	0.535211	0.0917921	5.51997e-09	0.061731	lncRNA	TRUE
chr11	ENSG00000184224	cg11566244	rs640777	C11orf72	-0.532152	0.0981388	5.87902e-08	0.0873235	lncRNA	TRUE
chr11	ENSG00000184224	cg09062970	rs640777	C11orf72	-0.369923	0.0719616	2.73927e-07	0.172583	lncRNA	TRUE
chr11	ENSG00000184224	cg03603279	rs640777	C11orf72	-0.427362	0.0856138	5.98353e-07	0.031048	lncRNA	FALSE
chr11	ENSG00000278615	cg09011167	rs71490397	C11orf98	-0.105031	0.0124608	3.48912e-17	0.695379	protein_coding	TRUE
chr11	ENSG00000278615	cg26363414	rs71490397	C11orf98	-0.0631551	0.00812864	7.88253e-15	0.220319	protein_coding	TRUE
chr11	ENSG00000278615	cg10449041	rs71490397	C11orf98	-0.066838	0.00984633	1.1361e-11	0.0238853	protein_coding	FALSE
chr11	ENSG00000278615	cg27305510	rs71490397	C11orf98	-0.0507973	0.00762471	2.69761e-11	0.365433	protein_coding	TRUE
chr11	ENSG00000278615	cg12316258	rs71490397	C11orf98	0.0526775	0.00939827	2.08225e-08	0.0737031	protein_coding	TRUE
chr11	ENSG00000278615	cg02375832	rs71490397	C11orf98	-0.0392683	0.00733125	8.49471e-08	0.475323	protein_coding	TRUE
chr11	ENSG00000278615	cg02600515	rs7936611	C11orf98	0.0929152	0.0184144	4.51652e-07	0.638305	protein_coding	TRUE
chr11	ENSG00000172375	cg16724696	rs668033	C2CD2L	0.0661212	0.0127777	2.28231e-07	0.149153	protein_coding	TRUE
chr11	ENSG00000172375	cg18732867	rs668033	C2CD2L	-0.12135	0.0247278	9.22786e-07	0.215904	protein_coding	TRUE
chr11	ENSG00000110619	cg04806632	rs451041	CARS1	0.439164	0.0859153	3.19459e-07	0.286359	protein_coding	TRUE
chr11	ENSG00000110619	cg25174290	rs451041	CARS1	-0.192788	0.0389787	7.57627e-07	0.120074	protein_coding	TRUE
chr11	ENSG00000121691	cg22326508	rs35513676	CAT	0.163748	0.027152	1.63138e-09	0.322455	protein_coding	TRUE
chr11	ENSG00000121691	cg01934076	rs35513676	CAT	0.203741	0.0395655	2.61238e-07	0.0209721	protein_coding	FALSE
chr11	ENSG00000149548	cg26082144	rs60040080	CCDC15	-0.345532	0.0552838	4.10048e-10	0.343092	protein_coding	TRUE
chr11	ENSG00000149548	cg03800939	rs60040080	CCDC15	-0.214932	0.0361835	2.84918e-09	0.380387	protein_coding	TRUE
chr11	ENSG00000149201	cg17837528	rs1955189	CCDC81	-0.227619	0.0368378	6.45256e-10	0.1289	protein_coding	TRUE
chr11	ENSG00000149201	cg08370040	rs1955189	CCDC81	-0.362632	0.0651614	2.61934e-08	0.00126536	protein_coding	FALSE
chr11	ENSG00000177697	cg01743873	rs142707435	CD151	-0.14416	0.0180611	1.44256e-15	0.676419	protein_coding	TRUE
chr11	ENSG00000177697	cg22596326	rs142707435	CD151	-0.203385	0.0317792	1.55442e-10	0.07401	protein_coding	TRUE
chr11	ENSG00000177697	cg02798112	rs142707435	CD151	-0.0635198	0.0108085	4.18237e-09	0.341923	protein_coding	TRUE
chr11	ENSG00000177697	cg03885332	rs142707435	CD151	-0.0656603	0.0118944	3.38457e-08	0.977773	protein_coding	TRUE
chr11	ENSG00000177697	cg24508095	rs142707435	CD151	-0.0420731	0.00787617	9.20158e-08	0.556271	protein_coding	TRUE
chr11	ENSG00000177697	cg26621248	rs142707435	CD151	-0.0585141	0.0110222	1.10394e-07	0.756641	protein_coding	TRUE
chr11	ENSG00000177697	cg15787769	rs142707435	CD151	-0.0592299	0.0112493	1.40038e-07	0.0079229	protein_coding	FALSE
chr11	ENSG00000177697	cg07269682	rs9704922	CD151	0.0847717	0.0162454	1.80681e-07	0.575174	protein_coding	TRUE
chr11	ENSG00000166037	cg03916912	rs143242628	CEP57	-0.147808	0.0293942	4.94377e-07	0.301207	protein_coding	TRUE
chr11	ENSG00000166037	cg25622487	rs143242628	CEP57	-0.112647	0.0225406	5.80725e-07	0.22054	protein_coding	TRUE
chr11	ENSG00000172725	cg25866895	rs10274	CORO1B	-0.150256	0.0276921	5.76436e-08	0.00922027	protein_coding	FALSE
chr11	ENSG00000172725	cg25135322	rs10274	CORO1B	-0.159204	0.0300193	1.13665e-07	0.00451123	protein_coding	FALSE
chr11	ENSG00000172725	cg05244766	rs10274	CORO1B	-0.157057	0.0299615	1.58877e-07	0.00689885	protein_coding	FALSE
chr11	ENSG00000172725	cg15336893	rs10274	CORO1B	0.0747716	0.0144428	2.25389e-07	0.679613	protein_coding	TRUE
chr11	ENSG00000109846	cg13897783	rs5794769	CRYAB	-0.00960321	0.00158119	1.25239e-09	0.18371	protein_coding	TRUE
chr11	ENSG00000109846	cg12532791	rs5794769	CRYAB	-0.00264366	0.000508877	2.04623e-07	0.211001	protein_coding	TRUE
chr11	ENSG00000109861	cg03183608	rs113755660	CTSC	-0.116628	0.0163268	9.1082e-13	0.0657975	protein_coding	TRUE
chr11	ENSG00000109861	cg21044820	rs34879788	CTSC	-0.135416	0.0274118	7.81013e-07	8.46704e-05	protein_coding	FALSE
chr11	ENSG00000174080	cg11509184	rs4576	CTSF	-0.0266622	0.00456022	5.01437e-09	0.388659	protein_coding	TRUE
chr11	ENSG00000174080	cg05516272	rs4576	CTSF	-0.0441842	0.00755893	5.05644e-09	0.217835	protein_coding	TRUE
chr11	ENSG00000174080	cg17237223	rs4576	CTSF	-0.0509581	0.00902263	1.62505e-08	0.282821	protein_coding	TRUE
chr11	ENSG00000174080	cg07977202	rs4576	CTSF	-0.0340813	0.00619145	3.70072e-08	0.354369	protein_coding	TRUE
chr11	ENSG00000174080	cg05087948	rs4576	CTSF	0.0403818	0.00806746	5.57114e-07	0.194041	protein_coding	TRUE
chr11	ENSG00000174080	cg07165756	rs4576	CTSF	-0.0281284	0.00569795	7.95045e-07	0.0841463	protein_coding	TRUE
chr11	ENSG00000166394	cg21433768	rs7926492	CYB5R2	0.00764082	0.00134227	1.25211e-08	0.372408	protein_coding	TRUE
chr11	ENSG00000166394	cg09053419	rs7926492	CYB5R2	0.00540941	0.00100022	6.36597e-08	0.250815	protein_coding	TRUE
chr11	ENSG00000166394	cg02090549	rs7926492	CYB5R2	-0.00792812	0.00154557	2.90379e-07	0.568639	protein_coding	TRUE
chr11	ENSG00000170959	cg06552810	rs553074	DCDC1	-0.402237	0.0626113	1.32428e-10	0.444206	protein_coding	TRUE
chr11	ENSG00000170959	cg19308365	rs553074	DCDC1	-0.0599249	0.0106298	1.72588e-08	0.390846	protein_coding	TRUE
chr11	ENSG00000170959	cg26647111	rs553074	DCDC1	-0.134308	0.024858	6.55314e-08	0.661932	protein_coding	TRUE
chr11	ENSG00000170959	cg19738233	rs553074	DCDC1	0.285319	0.0532487	8.4041e-08	0.485042	protein_coding	TRUE
chr11	ENSG00000178105	cg19819206	rs11212542	DDX10	0.163958	0.0308184	1.037e-07	0.822484	protein_coding	TRUE
chr11	ENSG00000109832	cg23727983	rs12799779	DDX25	-0.0621104	0.0107473	7.5061e-09	0.872266	protein_coding	TRUE
chr11	ENSG00000150764	cg13897783	rs5794769	DIXDC1	0.116297	0.0215241	6.5497e-08	0.210095	protein_coding	TRUE
chr11	ENSG00000170946	cg06552810	rs61879886	DNAJC24	-1.02561	0.190588	7.39495e-08	0.303565	protein_coding	TRUE
chr11	ENSG00000074266	cg08370040	rs7951030	EED	0.0946963	0.0126856	8.33829e-14	0.0337456	protein_coding	FALSE
chr11	ENSG00000110675	cg00276799	rs111337573	ELMOD1	-0.0555908	0.00811654	7.4329e-12	0.924268	protein_coding	TRUE
chr11	ENSG00000149485	cg07689907	rs174533	FADS1	-0.0176033	0.00294104	2.15836e-09	0.0674654	protein_coding	TRUE
chr11	ENSG00000054965	cg04044120	rs5792625	FAM168A	-0.0247058	0.0044376	2.58604e-08	0.0353583	protein_coding	FALSE
chr11	ENSG00000054965	cg18195628	rs5792625	FAM168A	-0.0129655	0.0023371	2.89477e-08	0.130436	protein_coding	TRUE
chr11	ENSG00000054965	cg25368100	rs5792625	FAM168A	-0.0153723	0.00279306	3.71809e-08	0.0511044	protein_coding	TRUE
chr11	ENSG00000054965	cg25592907	rs5792625	FAM168A	0.0211118	0.00413892	3.38208e-07	0.0987264	protein_coding	TRUE
chr11	ENSG00000033327	cg26219287	rs506383	GAB2	-0.268458	0.0265908	5.75886e-24	0.362941	protein_coding	TRUE
chr11	ENSG00000033327	cg20281309	rs506383	GAB2	-0.110593	0.0128783	8.88451e-18	0.714741	protein_coding	TRUE
chr11	ENSG00000033327	cg24744104	rs506383	GAB2	-0.113837	0.0150828	4.43856e-14	0.054054	protein_coding	TRUE
chr11	ENSG00000033327	cg20267732	rs506383	GAB2	-0.0786096	0.0111395	1.70347e-12	0.0900852	protein_coding	TRUE
chr11	ENSG00000033327	ch.11.1702122F	rs506383	GAB2	-0.0955965	0.0143891	3.05945e-11	0.471574	protein_coding	TRUE
chr11	ENSG00000033327	cg12161971	rs506383	GAB2	0.0854151	0.0144481	3.38306e-09	0.717549	protein_coding	TRUE
chr11	ENSG00000033327	cg22713192	rs506383	GAB2	-0.0768604	0.0131576	5.172e-09	0.864737	protein_coding	TRUE
chr11	ENSG00000033327	cg08906930	rs506383	GAB2	-0.122819	0.0210843	5.707e-09	0.00582328	protein_coding	FALSE
chr11	ENSG00000033327	cg09793342	rs506383	GAB2	-0.0574796	0.0104621	3.92818e-08	0.0641559	protein_coding	TRUE
chr11	ENSG00000033327	cg00808969	rs506383	GAB2	-0.0403933	0.00780165	2.24847e-07	0.707505	protein_coding	TRUE
chr11	ENSG00000033327	cg25310867	rs506383	GAB2	-0.0600224	0.0120575	6.42368e-07	0.957301	protein_coding	TRUE
chr11	ENSG00000023171	cg09612920	rs2846310	GRAMD1B	-0.00520539	0.00100121	2.00275e-07	0.921182	protein_coding	TRUE
chr11	ENSG00000023171	cg12728690	rs2846310	GRAMD1B	-0.00781366	0.0015287	3.19935e-07	0.766475	protein_coding	TRUE
chr11	ENSG00000023171	cg24961445	rs17127435	GRAMD1B	-0.00692937	0.00137253	4.45023e-07	0.262301	protein_coding	TRUE
chr11	ENSG00000023171	cg13709043	rs17127435	GRAMD1B	-0.0114652	0.00231881	7.63653e-07	0.149564	protein_coding	TRUE
chr11	ENSG00000084207	cg18464296	rs11339320	GSTP1	-0.0182724	0.00197701	2.40965e-20	0.888438	protein_coding	TRUE
chr11	ENSG00000084207	cg25135322	rs11339320	GSTP1	-0.0244238	0.00291224	5.00422e-17	0.697174	protein_coding	TRUE
chr11	ENSG00000084207	cg20362170	rs11339320	GSTP1	-0.0271222	0.00333776	4.44147e-16	0.370308	protein_coding	TRUE
chr11	ENSG00000084207	cg05244766	rs11339320	GSTP1	-0.0226798	0.00294185	1.26447e-14	0.506695	protein_coding	TRUE
chr11	ENSG00000084207	cg25866895	rs11339320	GSTP1	-0.0202595	0.0027167	8.82505e-14	0.181167	protein_coding	TRUE
chr11	ENSG00000084207	cg00864171	rs11339320	GSTP1	0.0215556	0.00289495	9.6266e-14	0.0698926	protein_coding	TRUE
chr11	ENSG00000084207	cg23725454	rs11339320	GSTP1	-0.0208795	0.00296833	2.00588e-12	0.579558	protein_coding	TRUE
chr11	ENSG00000084207	cg07493922	rs11339320	GSTP1	-0.0124442	0.00176971	2.03976e-12	0.550982	protein_coding	TRUE
chr11	ENSG00000084207	cg00290607	rs11339320	GSTP1	0.0181267	0.00258383	2.2924e-12	0.12433	protein_coding	TRUE
chr11	ENSG00000084207	cg17020635	rs11339320	GSTP1	-0.0139359	0.00199072	2.55157e-12	0.353841	protein_coding	TRUE
chr11	ENSG00000084207	cg23188684	rs11339320	GSTP1	0.0165895	0.00238905	3.81229e-12	0.0814141	protein_coding	TRUE
chr11	ENSG00000084207	cg08355456	rs11339320	GSTP1	0.0119591	0.00172523	4.15291e-12	0.0112857	protein_coding	FALSE
chr11	ENSG00000084207	cg24690094	rs11339320	GSTP1	0.0235623	0.00354793	3.11295e-11	0.284328	protein_coding	TRUE
chr11	ENSG00000084207	cg03603279	rs11339320	GSTP1	-0.00996036	0.00170882	5.58349e-09	0.085678	protein_coding	TRUE
chr11	ENSG00000084207	cg09062970	rs11339320	GSTP1	-0.00828902	0.00143464	7.56906e-09	0.678439	protein_coding	TRUE
chr11	ENSG00000084207	cg22224704	rs11339320	GSTP1	-0.00611795	0.0011609	1.36433e-07	0.637121	protein_coding	TRUE
chr11	ENSG00000084207	cg14500267	rs11339320	GSTP1	0.00944564	0.00182589	2.30173e-07	0.14363	protein_coding	TRUE
chr11	ENSG00000084207	cg11566244	rs11339320	GSTP1	-0.0101431	0.00196312	2.38114e-07	0.0322112	protein_coding	FALSE
chr11	ENSG00000084207	cg21660623	rs11339320	GSTP1	-0.00703756	0.00138506	3.75326e-07	0.502529	protein_coding	TRUE
chr11	ENSG00000084207	cg01391071	rs11339320	GSTP1	-0.00617526	0.00122651	4.78308e-07	0.752088	protein_coding	TRUE
chr11	ENSG00000084207	cg09038676	rs11339320	GSTP1	-0.0118378	0.00239292	7.53609e-07	0.82687	protein_coding	TRUE
chr11	ENSG00000256269	cg11367048	rs7479337	HMBS	-0.0797342	0.00911986	2.27167e-18	0.605267	protein_coding	TRUE
chr11	ENSG00000256269	cg00383220	rs7479337	HMBS	-0.0256523	0.0044087	5.93506e-09	0.0138852	protein_coding	FALSE
chr11	ENSG00000256269	cg16169193	rs7479337	HMBS	-0.0239398	0.0048342	7.33895e-07	0.960979	protein_coding	TRUE
chr11	ENSG00000256269	cg26145333	rs7479337	HMBS	-0.0203091	0.00413652	9.12108e-07	0.753179	protein_coding	TRUE
chr11	ENSG00000174775	cg17272744	rs12418264	HRAS	-0.281014	0.0552427	3.63973e-07	0.00163487	protein_coding	FALSE
chr11	ENSG00000142089	cg20008734	rs7944394	IFITM3	-0.0339592	0.00614973	3.35029e-08	0.502517	protein_coding	TRUE
chr11	ENSG00000142089	cg08596817	rs7944394	IFITM3	-0.0196338	0.00369219	1.05118e-07	0.831557	protein_coding	TRUE
chr11	ENSG00000132740	cg11245990	rs11600392	IGHMBP2	0.551953	0.0747559	1.54295e-13	0.291033	protein_coding	TRUE
chr11	ENSG00000132740	cg07511668	rs11600392	IGHMBP2	0.555385	0.0774627	7.51585e-13	0.307702	protein_coding	TRUE
chr11	ENSG00000132740	cg18350739	rs11600392	IGHMBP2	-0.412524	0.057925	1.06608e-12	0.374409	protein_coding	TRUE
chr11	ENSG00000132740	cg04772025	rs11600392	IGHMBP2	0.348915	0.0516443	1.41737e-11	0.099393	protein_coding	TRUE
chr11	ENSG00000132740	cg10879867	rs11600392	IGHMBP2	0.292296	0.0448758	7.34494e-11	0.741553	protein_coding	TRUE
chr11	ENSG00000132740	cg21862992	rs11600392	IGHMBP2	0.285131	0.0458122	4.84897e-10	0.781821	protein_coding	TRUE
chr11	ENSG00000132740	cg07716408	rs11600392	IGHMBP2	-0.312117	0.0538747	6.89805e-09	0.695533	protein_coding	TRUE
chr11	ENSG00000132740	cg08757828	rs11600392	IGHMBP2	0.278351	0.0494599	1.82505e-08	0.216779	protein_coding	TRUE
chr11	ENSG00000132740	cg01988459	rs11600392	IGHMBP2	-0.174026	0.032578	9.2013e-08	0.721623	protein_coding	TRUE
chr11	ENSG00000132740	cg08967684	rs11600392	IGHMBP2	-0.159524	0.0308667	2.36415e-07	0.138976	protein_coding	TRUE
chr11	ENSG00000160593	cg26487031	rs1056562	JAML	-0.385198	0.0744287	2.27424e-07	0.283019	protein_coding	TRUE
chr11	ENSG00000188997	cg26219287	rs492065	KCTD21	-0.857835	0.103379	1.05896e-16	0.212198	protein_coding	TRUE
chr11	ENSG00000188997	cg20281309	rs492065	KCTD21	-0.357611	0.0475297	5.31438e-14	0.470199	protein_coding	TRUE
chr11	ENSG00000188997	cg24744104	rs492065	KCTD21	-0.361008	0.0535431	1.55814e-11	0.20706	protein_coding	TRUE
chr11	ENSG00000188997	cg20267732	rs492065	KCTD21	-0.252701	0.0390007	9.20933e-11	0.00781654	protein_coding	FALSE
chr11	ENSG00000188997	ch.11.1702122F	rs492065	KCTD21	-0.301602	0.0496061	1.20233e-09	0.86725	protein_coding	TRUE
chr11	ENSG00000188997	cg22713192	rs492065	KCTD21	-0.231983	0.0441157	1.45229e-07	0.851238	protein_coding	TRUE
chr11	ENSG00000188997	cg08906930	rs492065	KCTD21	-0.365912	0.0705762	2.16439e-07	0.0498398	protein_coding	FALSE
chr11	ENSG00000188997	cg12161971	rs492065	KCTD21	0.242632	0.0482639	4.97711e-07	0.402875	protein_coding	TRUE
chr11	ENSG00000188997	cg00808969	rs492065	KCTD21	-0.128172	0.0258213	6.91262e-07	0.637182	protein_coding	TRUE
chr11	ENSG00000246174	cg08906930	rs7101694	KCTD21-AS1	-0.525703	0.0691122	2.81585e-14	0.105161	lncRNA	TRUE
chr11	ENSG00000246174	cg09721595	rs7101694	KCTD21-AS1	0.341822	0.055007	5.16041e-10	0.1903	lncRNA	TRUE
chr11	ENSG00000246174	cg24744104	rs146118913	KCTD21-AS1	-0.493161	0.0875162	1.74979e-08	0.175463	lncRNA	TRUE
chr11	ENSG00000246174	cg22713192	rs647602	KCTD21-AS1	-0.454891	0.0815924	2.473e-08	0.257167	lncRNA	TRUE
chr11	ENSG00000246174	cg20267732	rs146118913	KCTD21-AS1	-0.349607	0.0642067	5.17978e-08	0.115392	lncRNA	TRUE
chr11	ENSG00000233930	cg20027784	rs1809668	KRTAP5-AS1	0.151878	0.0235768	1.18039e-10	0.22092	lncRNA	TRUE
chr11	ENSG00000233930	cg06231783	rs1809668	KRTAP5-AS1	-0.187231	0.0309871	1.52004e-09	0.00502173	lncRNA	FALSE
chr11	ENSG00000233930	cg17416644	rs1809668	KRTAP5-AS1	-0.217047	0.0423601	2.99364e-07	0.0123982	lncRNA	FALSE
chr11	ENSG00000165905	cg05861348	rs11038709	LARGE2	-0.332082	0.0593386	2.18853e-08	0.815856	protein_coding	TRUE
chr11	ENSG00000165905	cg24204282	rs11038709	LARGE2	-0.326208	0.0606753	7.60323e-08	0.657218	protein_coding	TRUE
chr11	ENSG00000162194	cg09011167	rs11231174	LBHD1	-0.0298595	0.00320874	1.33113e-20	0.634278	protein_coding	TRUE
chr11	ENSG00000162194	cg26363414	rs11231174	LBHD1	-0.0179825	0.00212675	2.78181e-17	0.463986	protein_coding	TRUE
chr11	ENSG00000162194	cg10449041	rs11231174	LBHD1	-0.018952	0.00263337	6.16182e-13	0.0138943	protein_coding	FALSE
chr11	ENSG00000162194	cg27305510	rs11231174	LBHD1	-0.0144755	0.00204222	1.35948e-12	0.270173	protein_coding	TRUE
chr11	ENSG00000162194	cg12316258	rs11231174	LBHD1	0.0150822	0.00256247	3.96148e-09	0.175586	protein_coding	TRUE
chr11	ENSG00000162194	cg02600515	rs7941208	LBHD1	0.0254873	0.00442611	8.49154e-09	0.668122	protein_coding	TRUE
chr11	ENSG00000162194	cg03909529	rs7941208	LBHD1	0.0327	0.00584364	2.1957e-08	0.395486	protein_coding	TRUE
chr11	ENSG00000162194	cg02375832	rs11231174	LBHD1	-0.0111702	0.00200812	2.65923e-08	0.967716	protein_coding	TRUE
chr11	ENSG00000166800	cg15463284	rs2658548	LDHAL6A	-0.857538	0.143788	2.46304e-09	0.100589	protein_coding	TRUE
chr11	ENSG00000166800	cg15700009	rs2658548	LDHAL6A	-0.788621	0.137361	9.39857e-09	0.152659	protein_coding	TRUE
chr11	ENSG00000166800	cg07398106	rs2658548	LDHAL6A	-1.45375	0.253434	9.68233e-09	0.00372853	protein_coding	FALSE
chr11	ENSG00000166800	cg11821245	rs2658548	LDHAL6A	-1.25983	0.222398	1.47248e-08	0.0046842	protein_coding	FALSE
chr11	ENSG00000166800	cg07415359	rs2658548	LDHAL6A	-0.837318	0.151954	3.58175e-08	0.00928437	protein_coding	FALSE
chr11	ENSG00000166800	cg14259717	rs2658548	LDHAL6A	-0.903924	0.176604	3.08199e-07	0.00656321	protein_coding	FALSE
chr11	ENSG00000166796	cg07398106	rs11605386	LDHC	-1.06769	0.0727296	8.62556e-49	0.509808	protein_coding	TRUE
chr11	ENSG00000166796	cg11821245	rs11605386	LDHC	-0.882909	0.068202	2.49113e-38	0.325273	protein_coding	TRUE
chr11	ENSG00000166796	cg07415359	rs11605386	LDHC	-0.584128	0.0482186	8.88484e-34	0.14086	protein_coding	TRUE
chr11	ENSG00000166796	cg21471707	rs11605386	LDHC	-0.640967	0.0586955	9.22936e-28	0.883734	protein_coding	TRUE
chr11	ENSG00000166796	cg14259717	rs11605386	LDHC	-0.634438	0.0596096	1.87554e-26	0.527708	protein_coding	TRUE
chr11	ENSG00000166796	cg08418111	rs11605386	LDHC	-0.485641	0.0476463	2.13886e-24	0.878691	protein_coding	TRUE
chr11	ENSG00000166796	cg14332815	rs11605386	LDHC	-0.516279	0.0519632	2.91772e-23	0.837499	protein_coding	TRUE
chr11	ENSG00000166796	cg19767548	rs11605386	LDHC	-0.48948	0.0622566	3.77163e-15	0.694929	protein_coding	TRUE
chr11	ENSG00000166796	cg02232751	rs11605386	LDHC	-0.263906	0.0378506	3.11789e-12	0.978604	protein_coding	TRUE
chr11	ENSG00000166796	cg06888460	rs11605386	LDHC	-0.259845	0.04065	1.63453e-10	0.265483	protein_coding	TRUE
chr11	ENSG00000166796	cg01489981	rs11605386	LDHC	-0.165206	0.0276626	2.34144e-09	0.118726	protein_coding	TRUE
chr11	ENSG00000166796	cg15463284	rs11605386	LDHC	-0.321733	0.056077	9.61704e-09	0.0026316	protein_coding	FALSE
chr11	ENSG00000166796	cg15700009	rs11605386	LDHC	-0.307102	0.0538786	1.19887e-08	0.00661691	protein_coding	FALSE
chr11	ENSG00000166796	cg18888461	rs11605386	LDHC	-0.255403	0.048896	1.75667e-07	0.00986013	protein_coding	FALSE
chr11	ENSG00000166796	cg26740318	rs11605386	LDHC	-0.309784	0.0622646	6.51496e-07	0.191622	protein_coding	TRUE
chr11	ENSG00000251323	cg26219287	rs492065	LINC02728	-2.8343	0.450448	3.13053e-10	0.00628472	lncRNA	FALSE
chr11	ENSG00000251323	cg20281309	rs492065	LINC02728	-1.18155	0.199118	2.95766e-09	0.0525453	lncRNA	TRUE
chr11	ENSG00000251323	cg24744104	rs492065	LINC02728	-1.19277	0.215798	3.25265e-08	0.332788	lncRNA	TRUE
chr11	ENSG00000251323	cg20267732	rs492065	LINC02728	-0.834927	0.155203	7.46622e-08	0.154785	lncRNA	TRUE
chr11	ENSG00000251323	ch.11.1702122F	rs492065	LINC02728	-0.996496	0.193708	2.68498e-07	0.839987	lncRNA	TRUE
chr11	ENSG00000148948	cg03818576	rs998447	LRRC4C	-0.0402095	0.00532119	4.14154e-14	0.291717	protein_coding	TRUE
chr11	ENSG00000148948	cg26553513	rs998447	LRRC4C	-0.033792	0.00537338	3.19967e-10	0.0690928	protein_coding	TRUE
chr11	ENSG00000110514	cg24977308	rs112777088	MADD	-0.00911035	0.00158317	8.69068e-09	0.182865	protein_coding	TRUE
chr11	ENSG00000110514	cg23350132	rs10501320	MADD	-0.0101815	0.00177921	1.05005e-08	0.615864	protein_coding	TRUE
chr11	ENSG00000110514	cg22070650	rs10501320	MADD	-0.0118505	0.00210463	1.79514e-08	0.223299	protein_coding	TRUE
chr11	ENSG00000110514	cg20307385	rs71475912	MADD	-0.0108892	0.00205304	1.13314e-07	0.0395985	protein_coding	FALSE
chr11	ENSG00000110514	cg27221977	rs10501320	MADD	-0.00863619	0.00169089	3.26507e-07	0.583895	protein_coding	TRUE
chr11	ENSG00000151376	cg12030550	rs61703751	ME3	-0.0686688	0.0124452	3.43476e-08	0.560504	protein_coding	TRUE
chr11	ENSG00000151376	cg03955932	rs61703751	ME3	-0.0793909	0.0158167	5.18266e-07	0.282309	protein_coding	TRUE
chr11	ENSG00000151376	cg09416908	rs61703751	ME3	-0.0602569	0.012248	8.6656e-07	0.154218	protein_coding	TRUE
chr11	ENSG00000197345	cg11245990	rs111612765	MRPL21	-0.16851	0.0135107	1.05659e-35	0.944002	protein_coding	TRUE
chr11	ENSG00000197345	cg18350739	rs111612765	MRPL21	0.128136	0.0109328	1.00373e-31	0.931292	protein_coding	TRUE
chr11	ENSG00000197345	cg07511668	rs111612765	MRPL21	-0.170562	0.0145903	1.43301e-31	0.934196	protein_coding	TRUE
chr11	ENSG00000197345	cg04772025	rs111612765	MRPL21	-0.106495	0.0105202	4.37015e-24	0.0706432	protein_coding	TRUE
chr11	ENSG00000197345	cg21862992	rs111612765	MRPL21	-0.0882319	0.0100233	1.33629e-18	0.77525	protein_coding	TRUE
chr11	ENSG00000197345	cg10879867	rs111612765	MRPL21	-0.0834827	0.00974054	1.02908e-17	0.838622	protein_coding	TRUE
chr11	ENSG00000197345	cg08757828	rs111612765	MRPL21	-0.0883963	0.0115138	1.62296e-14	0.0547716	protein_coding	TRUE
chr11	ENSG00000197345	cg07716408	rs111612765	MRPL21	0.0949441	0.0124743	2.71582e-14	0.907946	protein_coding	TRUE
chr11	ENSG00000197345	cg08967684	rs111612765	MRPL21	0.0531707	0.00743166	8.3906e-13	0.539259	protein_coding	TRUE
chr11	ENSG00000197345	cg01988459	rs111612765	MRPL21	0.0550219	0.00781559	1.92222e-12	0.544269	protein_coding	TRUE
chr11	ENSG00000197345	cg04008888	rs111612765	MRPL21	0.0982314	0.0174657	1.86337e-08	0.0206282	protein_coding	FALSE
chr11	ENSG00000197345	cg14152222	rs111612765	MRPL21	0.0355993	0.00667274	9.55243e-08	0.0169356	protein_coding	FALSE
chr11	ENSG00000197345	cg02939879	rs111612765	MRPL21	0.0337443	0.00656795	2.78089e-07	0.385979	protein_coding	TRUE
chr11	ENSG00000197345	cg00242965	rs111612765	MRPL21	-0.0530792	0.0106395	6.07302e-07	0.777219	protein_coding	TRUE
chr11	ENSG00000214026	cg27617775	rs170086	MRPL23	0.128535	0.0261643	8.98705e-07	0.0314982	protein_coding	FALSE
chr11	ENSG00000175581	cg04044120	rs7125433	MRPL48	0.333251	0.0522634	1.81332e-10	0.154735	protein_coding	TRUE
chr11	ENSG00000175581	cg25368100	rs7125433	MRPL48	0.200417	0.0328217	1.02005e-09	0.204506	protein_coding	TRUE
chr11	ENSG00000175581	cg04950148	rs7125433	MRPL48	0.310399	0.0516535	1.8637e-09	0.227417	protein_coding	TRUE
chr11	ENSG00000149480	cg10449041	rs11231155	MTA2	-0.0276799	0.00466658	3.00128e-09	0.0677249	protein_coding	TRUE
chr11	ENSG00000149480	cg09011167	rs11231155	MTA2	-0.0326787	0.00587352	2.64068e-08	0.0103937	protein_coding	FALSE
chr11	ENSG00000149480	cg26363414	rs11231155	MTA2	-0.0204535	0.00377968	6.2527e-08	0.010743	protein_coding	FALSE
chr11	ENSG00000109919	cg17688768	rs10128705	MTCH2	-0.0550033	0.00943204	5.49171e-09	0.729574	protein_coding	TRUE
chr11	ENSG00000109919	cg24977308	rs10128705	MTCH2	-0.0551894	0.00990537	2.52314e-08	0.570194	protein_coding	TRUE
chr11	ENSG00000109919	cg20449816	rs10128705	MTCH2	-0.0390182	0.00722299	6.59187e-08	0.537137	protein_coding	TRUE
chr11	ENSG00000087053	cg25622487	rs1254813	MTMR2	-0.0995635	0.0175577	1.4225e-08	0.384175	protein_coding	TRUE
chr11	ENSG00000087053	cg03916912	rs1254813	MTMR2	-0.108272	0.0209857	2.47857e-07	0.179874	protein_coding	TRUE
chr11	ENSG00000077616	cg05041596	rs10765259	NAALAD2	0.120599	0.0191588	3.08049e-10	0.204339	protein_coding	TRUE
chr11	ENSG00000137513	cg26219287	rs61900203	NARS2	-0.559806	0.0828274	1.39228e-11	0.0625241	protein_coding	TRUE
chr11	ENSG00000137513	cg20281309	rs61900203	NARS2	-0.221151	0.0364514	1.30323e-09	0.522276	protein_coding	TRUE
chr11	ENSG00000137513	cg27205649	rs9666103	NARS2	0.108259	0.0181411	2.40785e-09	0.568177	protein_coding	TRUE
chr11	ENSG00000137513	cg20267732	rs61900203	NARS2	-0.174038	0.0300915	7.31116e-09	0.0204178	protein_coding	FALSE
chr11	ENSG00000137513	cg24744104	rs61900203	NARS2	-0.233786	0.0408298	1.02901e-08	0.153716	protein_coding	TRUE
chr11	ENSG00000137513	ch.11.1702122F	rs61900203	NARS2	-0.203271	0.0375663	6.2675e-08	0.894672	protein_coding	TRUE
chr11	ENSG00000137513	cg08906930	rs61900203	NARS2	-0.263562	0.0529362	6.39615e-07	0.466892	protein_coding	TRUE
chr11	ENSG00000137513	cg02461460	rs9666103	NARS2	-0.0749886	0.0151434	7.34952e-07	0.00111262	protein_coding	FALSE
chr11	ENSG00000188211	cg16820186	rs7484027	NCR3LG1	-0.191566	0.0383764	5.98289e-07	0.709129	protein_coding	TRUE
chr11	ENSG00000167792	cg18464296	rs11339320	NDUFV1	-0.0379272	0.00564533	1.83802e-11	0.512891	protein_coding	TRUE
chr11	ENSG00000167792	cg25135322	rs11339320	NDUFV1	-0.0506954	0.00796198	1.92527e-10	0.329259	protein_coding	TRUE
chr11	ENSG00000167792	cg20362170	rs11339320	NDUFV1	-0.0562964	0.00900626	4.08322e-10	0.281945	protein_coding	TRUE
chr11	ENSG00000167792	cg05244766	rs11339320	NDUFV1	-0.0470755	0.00777444	1.40277e-09	0.304934	protein_coding	TRUE
chr11	ENSG00000167792	cg25866895	rs11339320	NDUFV1	-0.0420518	0.00709046	3.01538e-09	0.231711	protein_coding	TRUE
chr11	ENSG00000167792	cg00864171	rs11339320	NDUFV1	0.044742	0.00755141	3.12324e-09	0.635658	protein_coding	TRUE
chr11	ENSG00000167792	cg23725454	rs11339320	NDUFV1	-0.0433387	0.00758855	1.12274e-08	0.538128	protein_coding	TRUE
chr11	ENSG00000167792	cg07493922	rs11339320	NDUFV1	-0.0258298	0.00452376	1.13102e-08	0.941694	protein_coding	TRUE
chr11	ENSG00000167792	cg00290607	rs11339320	NDUFV1	0.0376248	0.00659961	1.19058e-08	0.613553	protein_coding	TRUE
chr11	ENSG00000167792	cg17020635	rs11339320	NDUFV1	-0.0289263	0.00508101	1.24815e-08	0.400861	protein_coding	TRUE
chr11	ENSG00000167792	cg23188684	rs11339320	NDUFV1	0.0344342	0.00608107	1.49167e-08	0.452639	protein_coding	TRUE
chr11	ENSG00000167792	cg08355456	rs11339320	NDUFV1	0.024823	0.00438882	1.54981e-08	0.224402	protein_coding	TRUE
chr11	ENSG00000167792	cg24690094	rs11339320	NDUFV1	0.0489072	0.00890086	3.91451e-08	0.759517	protein_coding	TRUE
chr11	ENSG00000167792	cg03603279	rs11339320	NDUFV1	-0.0206743	0.00412878	5.51797e-07	0.254287	protein_coding	TRUE
chr11	ENSG00000167792	cg09062970	rs11339320	NDUFV1	-0.0172052	0.00345838	6.52726e-07	0.314447	protein_coding	TRUE
chr11	ENSG00000160703	cg18732867	rs644252	NLRX1	-0.388451	0.0593781	6.07019e-11	0.000603781	protein_coding	FALSE
chr11	ENSG00000160703	cg02753826	rs644252	NLRX1	-0.209975	0.0338224	5.36063e-10	0.00073092	protein_coding	FALSE
chr11	ENSG00000160703	cg06540757	rs644252	NLRX1	-0.149803	0.028658	1.72053e-07	0.029366	protein_coding	FALSE
chr11	ENSG00000160703	cg16724696	rs644252	NLRX1	0.149411	0.0289227	2.39302e-07	0.240265	protein_coding	TRUE
chr11	ENSG00000160703	cg26863308	rs644252	NLRX1	-0.177057	0.0345834	3.06037e-07	0.399272	protein_coding	TRUE
chr11	ENSG00000160703	cg06719628	rs644252	NLRX1	-0.19872	0.0398348	6.08178e-07	0.711917	protein_coding	TRUE
chr11	ENSG00000030066	cg15024177	rs10838773	NUP160	-0.0825479	0.0165356	5.97174e-07	0.25297	protein_coding	TRUE
chr11	ENSG00000184232	cg24055007	rs618265	OAF	-0.0183045	0.00320361	1.10553e-08	0.781222	protein_coding	TRUE
chr11	ENSG00000184232	cg15412087	rs12792820	OAF	-0.013225	0.00252999	1.72011e-07	0.557855	protein_coding	TRUE
chr11	ENSG00000181074	cg12471950	rs7129909	OR52N4	-0.516699	0.102096	4.17269e-07	0.0803767	protein_coding	TRUE
chr11	ENSG00000183378	cg21433768	rs7926492	OVCH2	0.0144377	0.0026136	3.31259e-08	0.41663	protein_coding	TRUE
chr11	ENSG00000183378	cg09053419	rs7926492	OVCH2	0.0102213	0.00194205	1.41602e-07	0.362113	protein_coding	TRUE
chr11	ENSG00000183378	cg02090549	rs7926492	OVCH2	-0.0149806	0.00299292	5.57679e-07	0.515888	protein_coding	TRUE
chr11	ENSG00000175115	cg11156528	rs11227439	PACS1	0.0800945	0.0158326	4.21824e-07	0.111365	protein_coding	TRUE
chr11	ENSG00000110218	cg18213661	rs72968771	PANX1	1.23337	0.197239	4.02294e-10	0.516926	protein_coding	TRUE
chr11	ENSG00000110218	cg18109485	rs4753123	PANX1	0.249934	0.0463674	7.03432e-08	0.0223824	protein_coding	FALSE
chr11	ENSG00000110218	cg05543025	rs72968771	PANX1	-0.297578	0.0560758	1.11615e-07	0.0237653	protein_coding	FALSE
chr11	ENSG00000134627	cg04757806	rs76114211	PIWIL4	-0.245834	0.0481559	3.3088e-07	0.349645	protein_coding	TRUE
chr11	ENSG00000178202	cg14167139	rs3741060	POGLUT3	-0.122343	0.0123556	4.08986e-23	0.153381	protein_coding	TRUE
chr11	ENSG00000178202	cg08421326	rs3741060	POGLUT3	-0.0794788	0.0103681	1.77865e-14	0.944426	protein_coding	TRUE
chr11	ENSG00000178202	cg18916307	rs3741060	POGLUT3	-0.0687168	0.0115215	2.45839e-09	0.72158	protein_coding	TRUE
chr11	ENSG00000185627	cg18336825	rs10794302	PSMD13	-0.310196	0.0319111	2.46227e-22	0.122147	protein_coding	TRUE
chr11	ENSG00000185627	cg23513443	rs10794302	PSMD13	-0.144927	0.0163229	6.76262e-19	0.124401	protein_coding	TRUE
chr11	ENSG00000123892	cg04421271	rs35854553	RAB38	-0.426588	0.0762008	2.16579e-08	0.957262	protein_coding	TRUE
chr11	ENSG00000123892	cg00027674	rs35854553	RAB38	-0.441268	0.0797777	3.18021e-08	0.693334	protein_coding	TRUE
chr11	ENSG00000123892	cg17108629	rs35854553	RAB38	-0.189301	0.0346159	4.5354e-08	0.694146	protein_coding	TRUE
chr11	ENSG00000175582	cg18195628	rs10898931	RAB6A	0.0463403	0.00864856	8.40788e-08	0.798445	protein_coding	TRUE
chr11	ENSG00000175582	cg04044120	rs10898931	RAB6A	0.0819584	0.0160115	3.07596e-07	0.65147	protein_coding	TRUE
chr11	ENSG00000175582	cg25368100	rs10898931	RAB6A	0.0507547	0.010039	4.28677e-07	0.913793	protein_coding	TRUE
chr11	ENSG00000172922	cg25302603	rs3372	RNASEH2C	-0.119493	0.0241838	7.771e-07	0.491114	protein_coding	TRUE
chr11	ENSG00000118181	cg01237326	rs4445645	RPS25	0.013552	0.00214357	2.57903e-10	0.318358	protein_coding	TRUE
chr11	ENSG00000118181	cg13213498	rs4445645	RPS25	-0.00466167	0.000917166	3.72117e-07	0.96104	protein_coding	TRUE
chr11	ENSG00000118181	cg18351479	rs4445645	RPS25	-0.00637684	0.00129404	8.31428e-07	0.715689	protein_coding	TRUE
chr11	ENSG00000167325	cg18722618	rs7102508	RRM1	0.0390775	0.00649255	1.75694e-09	0.177001	protein_coding	TRUE
chr11	ENSG00000166788	cg19590911	rs148650821	SAAL1	0.19791	0.0388885	3.59638e-07	0.000114702	protein_coding	FALSE
chr11	ENSG00000185187	cg18351999	rs35828848	SIGIRR	-1.25722	0.224323	2.08835e-08	0.937546	protein_coding	TRUE
chr11	ENSG00000142082	cg18336825	rs3782115	SIRT3	0.547087	0.0887991	7.23072e-10	0.0586892	protein_coding	TRUE
chr11	ENSG00000142082	cg23513443	rs3782115	SIRT3	0.26271	0.0442352	2.86857e-09	0.0657694	protein_coding	TRUE
chr11	ENSG00000110446	cg03639386	rs522141	SLC15A3	0.0322682	0.00644244	5.48019e-07	0.0257001	protein_coding	FALSE
chr11	ENSG00000110436	cg14479638	rs675227	SLC1A2	-0.0138513	0.0025262	4.18048e-08	0.99382	protein_coding	TRUE
chr11	ENSG00000110436	cg27610672	rs675227	SLC1A2	-0.0137869	0.00255216	6.58902e-08	0.995542	protein_coding	TRUE
chr11	ENSG00000110436	cg25963980	rs675227	SLC1A2	-0.0108513	0.00201417	7.14475e-08	0.931844	protein_coding	TRUE
chr11	ENSG00000110436	cg07358852	rs675227	SLC1A2	-0.0118063	0.0022352	1.27783e-07	0.983784	protein_coding	TRUE
chr11	ENSG00000110436	cg19653967	rs675227	SLC1A2	-0.0087869	0.00177146	7.03958e-07	0.979516	protein_coding	TRUE
chr11	ENSG00000110660	cg24190527	rs34066069	SLC35F2	-0.0359948	0.00454593	2.41294e-15	0.662131	protein_coding	TRUE
chr11	ENSG00000110660	cg11117131	rs34066069	SLC35F2	0.0188059	0.0034588	5.4144e-08	0.00156198	protein_coding	FALSE
chr11	ENSG00000110660	cg18976159	rs34066069	SLC35F2	-0.0268153	0.00497367	6.98893e-08	0.00193024	protein_coding	FALSE
chr11	ENSG00000170290	cg11117131	rs7948284	SLN	0.0168309	0.00321242	1.61176e-07	0.120965	protein_coding	TRUE
chr11	ENSG00000255717	cg04813074	rs12225962	SNHG1	0.060403	0.00945433	1.67062e-10	0.0968916	lncRNA	TRUE
chr11	ENSG00000255717	cg18164926	rs12225962	SNHG1	0.0415405	0.00712783	5.61182e-09	0.802933	lncRNA	TRUE
chr11	ENSG00000255717	cg07112634	rs12225962	SNHG1	0.0495768	0.00876945	1.57348e-08	0.906407	lncRNA	TRUE
chr11	ENSG00000255717	cg05115468	rs12225962	SNHG1	0.0363632	0.00646621	1.87044e-08	0.68185	lncRNA	TRUE
chr11	ENSG00000255717	cg14329350	rs12225962	SNHG1	-0.0334028	0.00643033	2.05188e-07	0.0909196	lncRNA	TRUE
chr11	ENSG00000255717	cg03438692	rs12225962	SNHG1	0.0265126	0.00512918	2.35381e-07	0.853313	lncRNA	TRUE
chr11	ENSG00000120451	cg11721015	rs77272503	SNX19	0.0153451	0.00186879	2.18958e-16	0.227626	protein_coding	TRUE
chr11	ENSG00000120451	cg12179176	rs3831404	SNX19	-0.0683123	0.00981987	3.48723e-12	3.3077e-05	protein_coding	FALSE
chr11	ENSG00000120451	cg05962950	rs3831404	SNX19	-0.0952687	0.0144063	3.76674e-11	5.1722e-05	protein_coding	FALSE
chr11	ENSG00000120451	cg04608907	rs77272503	SNX19	0.0104423	0.00167415	4.44873e-10	0.484904	protein_coding	TRUE
chr11	ENSG00000120451	cg23642342	rs3831404	SNX19	-0.0316277	0.0055186	9.97718e-09	9.17365e-05	protein_coding	FALSE
chr11	ENSG00000172803	cg19792802	rs12225345	SNX32	0.183917	0.030054	9.3848e-10	0.104591	protein_coding	TRUE
chr11	ENSG00000172803	cg08416661	rs12225345	SNX32	0.268066	0.0484486	3.14797e-08	0.052801	protein_coding	TRUE
chr11	ENSG00000110080	cg12017702	rs2230278	ST3GAL4	-0.159592	0.0258513	6.68092e-10	0.96423	protein_coding	TRUE
chr11	ENSG00000110080	cg20037145	rs2230278	ST3GAL4	-0.0970327	0.0189004	2.83801e-07	0.502514	protein_coding	TRUE
chr11	ENSG00000130413	cg08449403	rs10743073	STK33	-0.0558759	0.00845187	3.81569e-11	0.0403505	protein_coding	FALSE
chr11	ENSG00000130413	cg10639395	rs10743073	STK33	0.0599398	0.0099745	1.8632e-09	0.0348213	protein_coding	FALSE
chr11	ENSG00000130413	cg01677628	rs10743073	STK33	0.0310922	0.00578848	7.81295e-08	0.0239945	protein_coding	FALSE
chr11	ENSG00000134910	cg03990082	rs494989	STT3A	0.0738951	0.0145932	4.1125e-07	0.202101	protein_coding	TRUE
chr11	ENSG00000198168	cg26918510	rs2403752	SVIP	0.0563307	0.0106021	1.07743e-07	0.00195762	protein_coding	FALSE
chr11	ENSG00000198168	cg01129966	rs2286811	SVIP	0.0678242	0.0136439	6.65968e-07	0.371306	protein_coding	TRUE
chr11	ENSG00000162298	cg15957004	rs3825073	SYVN1	0.056565	0.011391	6.84383e-07	0.367971	protein_coding	TRUE
chr11	ENSG00000149591	cg20608306	rs9326248	TAGLN	0.0809967	0.0122692	4.06715e-11	0.00372055	protein_coding	FALSE
chr11	ENSG00000149591	cg10130564	rs9326248	TAGLN	0.0372145	0.00588755	2.60083e-10	0.474869	protein_coding	TRUE
chr11	ENSG00000149591	cg05256304	rs9326248	TAGLN	0.0619109	0.0106807	6.77106e-09	0.00217908	protein_coding	FALSE
chr11	ENSG00000149591	cg05122696	rs9326248	TAGLN	0.0565893	0.010154	2.50225e-08	0.00378312	protein_coding	FALSE
chr11	ENSG00000149591	cg04103193	rs9326248	TAGLN	-0.0623945	0.0114691	5.32173e-08	0.696083	protein_coding	TRUE
chr11	ENSG00000149591	cg15534755	rs9326248	TAGLN	0.038933	0.00731274	1.01513e-07	0.119743	protein_coding	TRUE
chr11	ENSG00000149591	cg26058746	rs9326248	TAGLN	-0.0337312	0.00649934	2.10361e-07	0.774151	protein_coding	TRUE
chr11	ENSG00000149591	cg18893612	rs9326248	TAGLN	0.0304204	0.00595321	3.2232e-07	0.86544	protein_coding	TRUE
chr11	ENSG00000149591	cg20854857	rs9326248	TAGLN	-0.0240714	0.0047559	4.16215e-07	0.635865	protein_coding	TRUE
chr11	ENSG00000154096	cg02455397	rs34029275	THY1	-0.0206242	0.00375516	3.96905e-08	0.602866	protein_coding	TRUE
chr11	ENSG00000173825	cg16555856	rs116742819	TIGD3	-1.41176	0.245469	8.85792e-09	0.400457	protein_coding	TRUE
chr11	ENSG00000173825	cg22229551	rs116742819	TIGD3	-0.875856	0.176317	6.78208e-07	0.149196	protein_coding	TRUE
chr11	ENSG00000006118	cg02920403	rs175134	TMEM132A	0.1047	0.0196582	1.00398e-07	0.545156	protein_coding	TRUE
chr11	ENSG00000006118	cg23043946	rs175134	TMEM132A	0.0645001	0.0121337	1.06191e-07	0.157216	protein_coding	TRUE
chr11	ENSG00000006118	cg26241240	rs175134	TMEM132A	0.033338	0.00661537	4.66801e-07	0.411308	protein_coding	TRUE
chr11	ENSG00000006118	cg09664380	rs175134	TMEM132A	0.0283094	0.00561898	4.69987e-07	0.508317	protein_coding	TRUE
chr11	ENSG00000187049	cg11814467	rs3809083	TMEM216	-0.349319	0.0449698	7.98285e-15	0.00507606	protein_coding	FALSE
chr11	ENSG00000187049	cg11786224	rs3809083	TMEM216	-0.191868	0.0279593	6.77195e-12	0.0409542	protein_coding	FALSE
chr11	ENSG00000187049	cg21104343	rs3809083	TMEM216	-0.202772	0.0298792	1.14986e-11	0.00367359	protein_coding	FALSE
chr11	ENSG00000187049	cg17680641	rs3809083	TMEM216	0.196371	0.0290947	1.48478e-11	0.0316957	protein_coding	FALSE
chr11	ENSG00000187049	cg22652719	rs3809083	TMEM216	-0.154619	0.02546	1.25518e-09	0.00174518	protein_coding	FALSE
chr11	ENSG00000187049	cg08960127	rs3809083	TMEM216	-0.154589	0.0263392	4.3804e-09	0.0012245	protein_coding	FALSE
chr11	ENSG00000187049	cg06964190	rs3809083	TMEM216	0.105048	0.0184928	1.34328e-08	0.0730284	protein_coding	TRUE
chr11	ENSG00000187049	cg02674352	rs3809083	TMEM216	0.129011	0.0232572	2.90379e-08	0.09707	protein_coding	TRUE
chr11	ENSG00000177042	cg23889236	rs6597995	TMEM80	-0.138083	0.0203557	1.17308e-11	0.689298	protein_coding	TRUE
chr11	ENSG00000177042	cg22199238	rs6597995	TMEM80	0.136238	0.0233448	5.34929e-09	0.000434842	protein_coding	FALSE
chr11	ENSG00000177042	cg00115288	rs6597995	TMEM80	-0.0812048	0.0139554	5.92424e-09	0.266259	protein_coding	TRUE
chr11	ENSG00000177042	cg17114584	rs4963140	TMEM80	0.148394	0.0272239	5.01248e-08	0.219395	protein_coding	TRUE
chr11	ENSG00000177042	cg12037516	rs4963140	TMEM80	-0.106355	0.0195801	5.57892e-08	0.738853	protein_coding	TRUE
chr11	ENSG00000177042	cg14135214	rs6597995	TMEM80	-0.0949802	0.0183648	2.31769e-07	0.0435354	protein_coding	FALSE
chr11	ENSG00000177042	cg06063517	rs4963140	TMEM80	0.0830417	0.0162073	2.99559e-07	0.106895	protein_coding	TRUE
chr11	ENSG00000177042	cg01741372	rs6597984	TMEM80	0.625759	0.12343	3.98342e-07	0.0631565	protein_coding	TRUE
chr11	ENSG00000177042	cg19602324	rs6597995	TMEM80	0.0852007	0.0171673	6.94221e-07	0.138817	protein_coding	TRUE
chr11	ENSG00000177042	cg25774643	rs4963140	TMEM80	-0.173081	0.0351559	8.51254e-07	0.632852	protein_coding	TRUE
chr11	ENSG00000254860	cg00061907	rs2316521	TMEM9B-AS1	-0.438222	0.0441445	3.17689e-23	0.0952874	lncRNA	TRUE
chr11	ENSG00000254860	cg15696082	rs2316521	TMEM9B-AS1	-0.688239	0.0702228	1.11707e-22	0.00392769	lncRNA	FALSE
chr11	ENSG00000254860	cg21881798	rs2316521	TMEM9B-AS1	-0.714518	0.0949163	5.15738e-14	0.000221813	lncRNA	FALSE
chr11	ENSG00000254860	cg16983486	rs10840135	TMEM9B-AS1	0.38713	0.0703497	3.73529e-08	0.0895726	lncRNA	TRUE
chr11	ENSG00000254860	cg09997546	rs2316521	TMEM9B-AS1	-0.150364	0.0297348	4.26272e-07	0.0700769	lncRNA	TRUE
chr11	ENSG00000213593	cg20712742	rs10896633	TMX2	-0.0383782	0.00701971	4.57189e-08	0.458557	protein_coding	TRUE
chr11	ENSG00000213593	cg24581311	rs10896633	TMX2	-0.103394	0.0195102	1.16131e-07	0.369695	protein_coding	TRUE
chr11	ENSG00000162341	cg12152352	rs35688294	TPCN2	-0.213649	0.0281139	2.97494e-14	0.646821	protein_coding	TRUE
chr11	ENSG00000162341	cg16709353	rs35688294	TPCN2	-0.177085	0.0233252	3.15011e-14	0.290948	protein_coding	TRUE
chr11	ENSG00000162341	cg02584610	rs35688294	TPCN2	-0.216828	0.02975	3.1383e-13	0.520683	protein_coding	TRUE
chr11	ENSG00000162341	cg06093500	rs35688294	TPCN2	-0.198143	0.0301024	4.63292e-11	0.159777	protein_coding	TRUE
chr11	ENSG00000162341	cg13874366	rs35688294	TPCN2	-0.0796739	0.0122808	8.71735e-11	0.322248	protein_coding	TRUE
chr11	ENSG00000162341	cg21670003	rs35688294	TPCN2	0.0865977	0.0149917	7.63196e-09	1.47517e-09	protein_coding	FALSE
chr11	ENSG00000162341	cg23845249	rs35688294	TPCN2	0.0754062	0.013236	1.21886e-08	0.198953	protein_coding	TRUE
chr11	ENSG00000129167	cg23625312	rs572940	TPH1	0.576435	0.10476	3.74543e-08	0.24878	protein_coding	TRUE
chr11	ENSG00000196655	cg01237326	rs61179449	TRAPPC4	-0.0672328	0.00905348	1.11774e-13	0.671185	protein_coding	TRUE
chr11	ENSG00000196655	cg13213498	rs61179449	TRAPPC4	0.0216068	0.00405302	9.76506e-08	0.395016	protein_coding	TRUE
chr11	ENSG00000196655	cg18351479	rs61179449	TRAPPC4	0.0300424	0.00573708	1.63619e-07	0.5892	protein_coding	TRUE
chr11	ENSG00000166436	cg01319593	rs10840106	TRIM66	0.0461191	0.00649117	1.20406e-12	0.839567	protein_coding	TRUE
chr11	ENSG00000166436	cg18753841	rs10840106	TRIM66	0.0397967	0.00583694	9.22677e-12	0.212073	protein_coding	TRUE
chr11	ENSG00000166436	cg10639395	rs10840106	TRIM66	-0.0705334	0.0112764	3.97576e-10	0.0575129	protein_coding	TRUE
chr11	ENSG00000166436	cg04747388	rs10840106	TRIM66	0.0377462	0.00615152	8.45832e-10	0.467519	protein_coding	TRUE
chr11	ENSG00000166436	cg12608775	rs10840106	TRIM66	0.041664	0.00727287	1.01208e-08	0.244121	protein_coding	TRUE
chr11	ENSG00000166436	cg26020521	rs10840106	TRIM66	0.0366514	0.00646006	1.39873e-08	0.0810655	protein_coding	TRUE
chr11	ENSG00000166436	cg21881798	rs10769947	TRIM66	0.171831	0.0320579	8.32091e-08	0.0236637	protein_coding	FALSE
chr11	ENSG00000166436	cg13143389	rs10840106	TRIM66	0.0330835	0.00625554	1.23206e-07	0.952818	protein_coding	TRUE
chr11	ENSG00000166436	cg15696082	rs10769947	TRIM66	0.133399	0.0252756	1.30773e-07	0.0213221	protein_coding	FALSE
chr11	ENSG00000149743	cg05934061	rs11603042	TRPT1	-0.270271	0.0427859	2.67012e-10	0.395031	protein_coding	TRUE
chr11	ENSG00000149743	cg18516140	rs11603042	TRPT1	-0.289831	0.0462301	3.62649e-10	0.355554	protein_coding	TRUE
chr11	ENSG00000149743	cg04000281	rs11603042	TRPT1	-0.263127	0.042693	7.12702e-10	0.359249	protein_coding	TRUE
chr11	ENSG00000149292	cg24963613	rs592739	TTC12	0.047468	0.00945127	5.10303e-07	0.455035	protein_coding	TRUE
chr11	ENSG00000149292	cg07838576	rs2186800	TTC12	-0.0204783	0.0041269	6.97159e-07	0.000788075	protein_coding	FALSE
chr11	ENSG00000162222	cg02600515	rs549312	TTC9C	0.337364	0.0570535	3.3571e-09	0.843169	protein_coding	TRUE
chr11	ENSG00000162222	cg03909529	rs549312	TTC9C	0.438436	0.0757192	7.02653e-09	0.416282	protein_coding	TRUE
chr11	ENSG00000154127	cg16423756	rs10892873	UBASH3B	0.110676	0.0203141	5.08749e-08	0.487603	protein_coding	TRUE
chr11	ENSG00000175567	cg10064339	rs75163598	UCP2	-0.328209	0.0413801	2.16387e-15	0.205796	protein_coding	TRUE
chr11	ENSG00000175567	cg22166739	rs75163598	UCP2	-0.149814	0.0199842	6.54971e-14	0.151378	protein_coding	TRUE
chr11	ENSG00000175567	cg26954736	rs75163598	UCP2	-0.0751393	0.0114305	4.91204e-11	0.113292	protein_coding	TRUE
chr11	ENSG00000175567	cg11417675	rs75163598	UCP2	-0.174372	0.0272552	1.57707e-10	0.279312	protein_coding	TRUE
chr11	ENSG00000175567	cg25592907	rs632862	UCP2	-0.294166	0.0562367	1.68734e-07	0.624252	protein_coding	TRUE
chr11	ENSG00000175567	cg04044120	rs35103580	UCP2	0.338158	0.0647211	1.74301e-07	0.837291	protein_coding	TRUE
chr11	ENSG00000175567	cg04950148	rs35103580	UCP2	0.310494	0.0622761	6.17192e-07	0.938444	protein_coding	TRUE
chr11	ENSG00000118369	cg26219287	rs647602	USP35	-1.14705	0.171318	2.15046e-11	0.109488	protein_coding	TRUE
chr11	ENSG00000118369	cg20281309	rs647602	USP35	-0.472533	0.076276	5.82731e-10	0.49144	protein_coding	TRUE
chr11	ENSG00000118369	cg24744104	rs647602	USP35	-0.486393	0.0843175	7.99404e-09	0.449702	protein_coding	TRUE
chr11	ENSG00000118369	cg20267732	rs647602	USP35	-0.335877	0.0606229	3.01715e-08	0.638786	protein_coding	TRUE
chr11	ENSG00000118369	ch.11.1702122F	rs647602	USP35	-0.408458	0.0765814	9.62632e-08	0.996321	protein_coding	TRUE
chr11	ENSG00000118369	cg12161971	rs647602	USP35	0.364955	0.0739957	8.13435e-07	0.931868	protein_coding	TRUE
chr11	ENSG00000160695	cg11367048	rs11217133	VPS11	0.0843826	0.0114903	2.07587e-13	0.238395	protein_coding	TRUE
chr11	ENSG00000160695	cg12385827	rs11217133	VPS11	-0.0792142	0.0110806	8.74832e-13	0.00495393	protein_coding	FALSE
chr11	ENSG00000167987	cg23043946	rs519296	VPS37C	-0.0405772	0.00413713	1.03941e-22	0.0933595	protein_coding	TRUE
chr11	ENSG00000167987	cg02920403	rs519296	VPS37C	-0.064854	0.00672268	5.05908e-22	0.458297	protein_coding	TRUE
chr11	ENSG00000167987	cg26241240	rs519296	VPS37C	-0.0211172	0.00240078	1.4181e-18	0.39838	protein_coding	TRUE
chr11	ENSG00000167987	cg09664380	rs519296	VPS37C	-0.0165166	0.00208462	2.3167e-15	0.0749271	protein_coding	TRUE
chr11	ENSG00000167987	cg07849136	rs519296	VPS37C	-0.0175291	0.00268731	6.89412e-11	0.0196328	protein_coding	FALSE
chr11	ENSG00000167987	cg07179634	rs519296	VPS37C	0.00704203	0.00132826	1.14742e-07	0.00409831	protein_coding	FALSE
chr11	ENSG00000167987	cg24949661	rs519296	VPS37C	-0.00865018	0.0016997	3.59513e-07	0.00222046	protein_coding	FALSE
chr11	ENSG00000167987	cg21871670	rs519296	VPS37C	0.00696191	0.00139883	6.45968e-07	0.312669	protein_coding	TRUE
chr11	ENSG00000167987	cg04250055	rs519296	VPS37C	0.0102805	0.0020871	8.40349e-07	0.0111575	protein_coding	FALSE
chr11	ENSG00000166435	cg12175146	rs12577614	XRRA1	-0.0330549	0.00514085	1.27723e-10	4.64581e-09	protein_coding	FALSE
chr11	ENSG00000166435	cg10021803	rs10899044	XRRA1	-0.0324371	0.00590246	3.89576e-08	0.00678867	protein_coding	FALSE
chr11	ENSG00000174165	cg05516272	rs59982644	ZDHHC24	0.297795	0.049534	1.83322e-09	0.549779	protein_coding	TRUE
chr11	ENSG00000174165	cg11509184	rs59982644	ZDHHC24	0.174592	0.0297906	4.61055e-09	0.21649	protein_coding	TRUE
chr11	ENSG00000174165	cg17237223	rs59982644	ZDHHC24	0.335847	0.0591559	1.36826e-08	0.868174	protein_coding	TRUE
chr11	ENSG00000174165	cg10956900	rs531490	ZDHHC24	0.231699	0.0412629	1.96353e-08	0.0164763	protein_coding	FALSE
chr11	ENSG00000174165	cg07977202	rs59982644	ZDHHC24	0.2281	0.0407356	2.1494e-08	0.521435	protein_coding	TRUE
chr11	ENSG00000174165	cg05087948	rs59982644	ZDHHC24	-0.268968	0.0533989	4.7301e-07	0.0939602	protein_coding	TRUE
chr11	ENSG00000174165	cg07165756	rs59982644	ZDHHC24	0.187731	0.0377523	6.6028e-07	0.15995	protein_coding	TRUE
chr12	ENSG00000250132	cg07916784	rs2079300	AC004803.1	-1.30074	0.259229	5.22814e-07	0.195108	lncRNA	TRUE
chr12	ENSG00000257176	cg12903224	rs966541	AC009318.1	0.151349	0.0155721	2.49646e-22	0.50679	lncRNA	TRUE
chr12	ENSG00000275476	cg12903224	rs10843390	AC009318.4	0.816056	0.0964217	2.59683e-17	0.664834	lncRNA	TRUE
chr12	ENSG00000275778	cg27095718	rs1451774	AC018630.4	0.528471	0.0626943	3.4767e-17	0.246924	protein_coding	TRUE
chr12	ENSG00000275778	cg21216543	rs1451774	AC018630.4	-0.256184	0.0320409	1.29001e-15	0.331413	protein_coding	TRUE
chr12	ENSG00000275778	cg17741383	rs1451774	AC018630.4	0.334087	0.051921	1.23868e-10	0.360958	protein_coding	TRUE
chr12	ENSG00000275778	cg17637969	rs1451774	AC018630.4	-0.16973	0.0312581	5.63689e-08	0.453462	protein_coding	TRUE
chr12	ENSG00000275778	cg16709841	rs1451774	AC018630.4	0.342471	0.0677328	4.27691e-07	0.46579	protein_coding	TRUE
chr12	ENSG00000177359	cg20134045	rs7957449	AC024940.1	-0.00316219	0.000613856	2.58609e-07	0.32326	transcribed_unprocessed_pseudogene	TRUE
chr12	ENSG00000177359	cg00391247	rs7957449	AC024940.1	-0.00258651	0.000518404	6.05782e-07	0.495062	transcribed_unprocessed_pseudogene	TRUE
chr12	ENSG00000177359	cg26633494	rs7957449	AC024940.1	-0.00299129	0.000609477	9.20291e-07	0.911051	transcribed_unprocessed_pseudogene	TRUE
chr12	ENSG00000258302	cg00757033	rs145187641	AC025034.1	1.05623	0.142682	1.33483e-13	0.253978	lncRNA	TRUE
chr12	ENSG00000258302	cg16688899	rs145187641	AC025034.1	-0.437504	0.0765762	1.10798e-08	0.66129	lncRNA	TRUE
chr12	ENSG00000272368	cg08189863	rs836179	AC074032.1	-1.02304	0.167536	1.01921e-09	0.351019	lncRNA	TRUE
chr12	ENSG00000272368	cg23440569	rs4026942	AC074032.1	-1.09676	0.201227	5.02754e-08	3.40192e-10	lncRNA	FALSE
chr12	ENSG00000256783	cg27523351	rs60784430	AC079031.1	-0.0603863	0.0115748	1.81811e-07	0.431643	lncRNA	TRUE
chr12	ENSG00000256783	cg15844201	rs60784430	AC079031.1	-0.087994	0.0175044	4.98327e-07	0.21672	lncRNA	TRUE
chr12	ENSG00000256875	cg07099606	rs12309386	AC079031.2	-0.112736	0.02053	3.98963e-08	0.00265654	lncRNA	FALSE
chr12	ENSG00000256875	cg27523351	rs12309386	AC079031.2	-0.0368466	0.00675208	4.84045e-08	0.939717	lncRNA	TRUE
chr12	ENSG00000256875	cg18946787	rs12309386	AC079031.2	-0.0864241	0.01691	3.20759e-07	0.00246559	lncRNA	FALSE
chr12	ENSG00000275764	cg21029764	rs11048831	AC092747.4	-0.278503	0.0475302	4.64285e-09	0.849125	lncRNA	TRUE
chr12	ENSG00000279500	cg23521905	rs4760533	AC108704.2	-0.628128	0.127411	8.22543e-07	0.000510235	TEC	FALSE
chr12	ENSG00000257497	cg21272279	rs11180550	AC121761.1	-0.295902	0.053147	2.58255e-08	0.229757	lncRNA	TRUE
chr12	ENSG00000257497	cg09171882	rs11180550	AC121761.1	0.228138	0.0439326	2.07032e-07	0.49939	lncRNA	TRUE
chr12	ENSG00000279233	cg05364487	rs7398636	AC122688.3	-0.212939	0.0382902	2.67944e-08	0.00388689	TEC	FALSE
chr12	ENSG00000250790	cg09537870	rs72624274	AC127070.2	1.63753	0.277106	3.43346e-09	0.0552256	lncRNA	TRUE
chr12	ENSG00000250790	cg10388270	rs72624274	AC127070.2	1.81816	0.311263	5.18155e-09	0.0269521	lncRNA	FALSE
chr12	ENSG00000250790	cg02243221	rs72624274	AC127070.2	1.64181	0.282185	5.94828e-09	0.0240163	lncRNA	FALSE
chr12	ENSG00000250790	cg22149555	rs72624274	AC127070.2	1.43951	0.247503	6.02262e-09	0.0563261	lncRNA	TRUE
chr12	ENSG00000250790	cg16020270	rs72624274	AC127070.2	1.3006	0.224194	6.58304e-09	0.0542178	lncRNA	TRUE
chr12	ENSG00000250790	cg05614952	rs72624274	AC127070.2	1.92352	0.332858	7.52356e-09	0.0376192	lncRNA	FALSE
chr12	ENSG00000250790	cg23470262	rs72624274	AC127070.2	1.37258	0.239229	9.60705e-09	0.0602385	lncRNA	TRUE
chr12	ENSG00000250790	cg23058246	rs72624274	AC127070.2	1.67063	0.29194	1.04959e-08	0.318573	lncRNA	TRUE
chr12	ENSG00000250790	cg03425615	rs72624274	AC127070.2	1.64125	0.287266	1.10767e-08	0.187449	lncRNA	TRUE
chr12	ENSG00000250790	cg08695912	rs72624274	AC127070.2	1.38033	0.246425	2.12571e-08	0.282818	lncRNA	TRUE
chr12	ENSG00000250790	cg13046214	rs72624274	AC127070.2	1.76243	0.319402	3.43061e-08	0.235718	lncRNA	TRUE
chr12	ENSG00000250790	cg07052262	rs72624274	AC127070.2	1.10794	0.203365	5.09308e-08	0.122648	lncRNA	TRUE
chr12	ENSG00000250790	cg20765580	rs72624274	AC127070.2	1.04932	0.193255	5.64469e-08	0.48994	lncRNA	TRUE
chr12	ENSG00000250790	cg19837214	rs72624274	AC127070.2	0.771596	0.145418	1.12021e-07	0.408447	lncRNA	TRUE
chr12	ENSG00000250790	cg16120883	rs72624274	AC127070.2	1.34781	0.254762	1.22e-07	0.44076	lncRNA	TRUE
chr12	ENSG00000250790	cg03538318	rs72624274	AC127070.2	0.878403	0.171975	3.26029e-07	0.468247	lncRNA	TRUE
chr12	ENSG00000250790	cg22844555	rs72624274	AC127070.2	0.737851	0.145095	3.67038e-07	0.824722	lncRNA	TRUE
chr12	ENSG00000250790	cg08424446	rs72624274	AC127070.2	1.15896	0.228327	3.85738e-07	0.923032	lncRNA	TRUE
chr12	ENSG00000250790	cg05625100	rs72624274	AC127070.2	1.73551	0.349667	6.92992e-07	0.454225	lncRNA	TRUE
chr12	ENSG00000250790	cg16214937	rs72624274	AC127070.2	0.819649	0.166169	8.11293e-07	0.853289	lncRNA	TRUE
chr12	ENSG00000278126	cg10377582	rs4077093	AC139768.1	-0.416132	0.06867	1.36224e-09	0.00996707	lncRNA	FALSE
chr12	ENSG00000278126	cg09828880	rs4077093	AC139768.1	-0.228768	0.0397308	8.51447e-09	0.00179304	lncRNA	FALSE
chr12	ENSG00000278126	cg12163867	rs4077093	AC139768.1	-0.132104	0.0249957	1.25646e-07	0.670111	lncRNA	TRUE
chr12	ENSG00000274373	cg02521854	rs10870577	AC148476.1	-1.12865	0.186213	1.3519e-09	0.262968	lncRNA	TRUE
chr12	ENSG00000274373	cg26937277	rs10870577	AC148476.1	-0.837502	0.140133	2.28038e-09	0.306	lncRNA	TRUE
chr12	ENSG00000274373	cg23166828	rs28432885	AC148476.1	-0.843346	0.17166	8.97515e-07	0.267593	lncRNA	TRUE
chr12	ENSG00000076555	cg23435821	rs2268405	ACACB	-0.182071	0.0202408	2.357e-19	0.887217	protein_coding	TRUE
chr12	ENSG00000076555	cg24284369	rs2268405	ACACB	-0.200255	0.0227805	1.48711e-18	0.961084	protein_coding	TRUE
chr12	ENSG00000076555	cg23837299	rs2268405	ACACB	-0.102445	0.016392	4.1122e-10	0.801556	protein_coding	TRUE
chr12	ENSG00000076555	cg15996769	rs2268405	ACACB	-0.0831122	0.0138986	2.23303e-09	0.302275	protein_coding	TRUE
chr12	ENSG00000229186	cg25567085	rs77422707	ADAM1A	0.119413	0.0233584	3.18423e-07	0.467572	unitary_pseudogene	TRUE
chr12	ENSG00000229186	cg11972180	rs77422707	ADAM1A	-0.128181	0.0257565	6.47001e-07	0.00934658	unitary_pseudogene	FALSE
chr12	ENSG00000111275	cg11972180	rs2239194	ALDH2	-0.0231517	0.00445536	2.03223e-07	0.0180024	protein_coding	FALSE
chr12	ENSG00000111275	cg13422253	rs3858706	ALDH2	-0.0199206	0.00398122	5.62568e-07	0.129419	protein_coding	TRUE
chr12	ENSG00000111275	cg20594304	rs11065976	ALDH2	-0.0482591	0.00970706	6.64199e-07	0.0610882	protein_coding	TRUE
chr12	ENSG00000176915	cg13614819	rs376879523	ANKLE2	0.0572125	0.00987934	6.9914e-09	0.262646	protein_coding	TRUE
chr12	ENSG00000176915	cg23058246	rs376879523	ANKLE2	0.0846577	0.0159018	1.01625e-07	0.0296917	protein_coding	FALSE
chr12	ENSG00000176915	cg07776804	rs12824438	ANKLE2	-0.0307661	0.00592676	2.0911e-07	0.0291731	protein_coding	FALSE
chr12	ENSG00000176915	cg02243221	rs376879523	ANKLE2	0.0765584	0.0149404	2.98703e-07	0.0175995	protein_coding	FALSE
chr12	ENSG00000176915	cg09904296	rs376879523	ANKLE2	-0.0364377	0.00716334	3.64352e-07	0.115979	protein_coding	TRUE
chr12	ENSG00000176915	cg22149555	rs376879523	ANKLE2	0.064432	0.0130571	8.02973e-07	0.0115675	protein_coding	FALSE
chr12	ENSG00000120868	cg21540775	rs9668110	APAF1	0.028207	0.00572607	8.39032e-07	0.0510218	protein_coding	TRUE
chr12	ENSG00000161798	cg23855989	rs11169225	AQP5	-0.879202	0.153876	1.10534e-08	0.54945	protein_coding	TRUE
chr12	ENSG00000161798	cg04450003	rs11169225	AQP5	-0.822881	0.159586	2.51815e-07	0.979029	protein_coding	TRUE
chr12	ENSG00000161798	cg26335476	rs11169225	AQP5	-1.04937	0.205968	3.4913e-07	0.921455	protein_coding	TRUE
chr12	ENSG00000086159	cg23855989	rs3759129	AQP6	-1.60392	0.270739	3.13769e-09	3.59903e-06	protein_coding	FALSE
chr12	ENSG00000086159	cg26335476	rs3759129	AQP6	-1.95066	0.36482	8.94613e-08	0.197068	protein_coding	TRUE
chr12	ENSG00000086159	cg04450003	rs3759129	AQP6	-1.49268	0.280546	1.03421e-07	0.124223	protein_coding	TRUE
chr12	ENSG00000134287	cg22573917	rs833837	ARF3	0.0229514	0.00458981	5.7178e-07	0.700149	protein_coding	TRUE
chr12	ENSG00000111676	cg01097940	rs12831467	ATN1	-0.00913073	0.00133542	8.06716e-12	0.699238	protein_coding	TRUE
chr12	ENSG00000111676	cg26269324	rs12831467	ATN1	-0.00859204	0.00129499	3.2485e-11	0.257887	protein_coding	TRUE
chr12	ENSG00000111676	cg25162631	rs12831467	ATN1	0.014814	0.00227751	7.7953e-11	0.63704	protein_coding	TRUE
chr12	ENSG00000111676	cg15411984	rs12831467	ATN1	-0.024917	0.00400524	4.93688e-10	0.352694	protein_coding	TRUE
chr12	ENSG00000111676	cg17476499	rs12831467	ATN1	-0.0236566	0.003853	8.2634e-10	0.345831	protein_coding	TRUE
chr12	ENSG00000111676	cg26229977	rs12831467	ATN1	-0.0152928	0.00285464	8.45355e-08	0.571962	protein_coding	TRUE
chr12	ENSG00000111676	cg08099141	rs12831467	ATN1	-0.00729722	0.00143461	3.64597e-07	0.576868	protein_coding	TRUE
chr12	ENSG00000111676	cg14593550	rs12831467	ATN1	-0.0115204	0.00230557	5.83013e-07	0.625773	protein_coding	TRUE
chr12	ENSG00000166896	cg02175503	rs10877039	ATP23	-0.321605	0.0352152	6.69087e-20	0.267482	protein_coding	TRUE
chr12	ENSG00000166896	cg21460868	rs10877039	ATP23	0.371348	0.0658289	1.68964e-08	8.89392e-05	protein_coding	FALSE
chr12	ENSG00000166896	cg21910536	rs71461333	ATP23	-0.353089	0.0693285	3.52466e-07	0.389406	protein_coding	TRUE
chr12	ENSG00000166896	cg00677455	rs10877039	ATP23	-0.172809	0.0342521	4.53048e-07	5.77534e-05	protein_coding	FALSE
chr12	ENSG00000166896	cg17392605	rs10877039	ATP23	-0.252703	0.0503731	5.25885e-07	0.000783547	protein_coding	FALSE
chr12	ENSG00000135390	cg06632207	rs3892761	ATP5MC2	0.0180523	0.00281211	1.36748e-10	0.000684073	protein_coding	FALSE
chr12	ENSG00000185344	cg25710520	rs10734904	ATP6V0A2	0.0970246	0.0125422	1.0269e-14	0.444264	protein_coding	TRUE
chr12	ENSG00000185344	cg04140754	rs10734904	ATP6V0A2	0.0596408	0.00927777	1.28995e-10	0.179044	protein_coding	TRUE
chr12	ENSG00000185344	cg16376770	rs10734904	ATP6V0A2	-0.0826671	0.0133742	6.3667e-10	0.136007	protein_coding	TRUE
chr12	ENSG00000185344	cg06735598	rs10734904	ATP6V0A2	-0.116554	0.0197763	3.77771e-09	0.124967	protein_coding	TRUE
chr12	ENSG00000185344	cg01110312	rs10734904	ATP6V0A2	0.0904893	0.0155755	6.25722e-09	0.122172	protein_coding	TRUE
chr12	ENSG00000185344	cg23463787	rs10734904	ATP6V0A2	0.0901345	0.0158313	1.24503e-08	0.383291	protein_coding	TRUE
chr12	ENSG00000185344	cg21767912	rs10734904	ATP6V0A2	0.0777494	0.0149448	1.96696e-07	0.140605	protein_coding	TRUE
chr12	ENSG00000185344	cg00347921	rs10734904	ATP6V0A2	-0.104929	0.0212887	8.27152e-07	0.0479905	protein_coding	FALSE
chr12	ENSG00000253719	cg04906455	rs3832833	ATXN7L3B	-0.0053519	0.000870343	7.78811e-10	0.3188	protein_coding	TRUE
chr12	ENSG00000060982	cg05257196	rs859145	BCAT1	-0.0316244	0.00605022	1.72297e-07	0.786246	protein_coding	TRUE
chr12	ENSG00000060982	cg15460816	rs859145	BCAT1	-0.0308977	0.00601344	2.77528e-07	0.789409	protein_coding	TRUE
chr12	ENSG00000060982	cg02873991	rs859145	BCAT1	-0.0242807	0.00491826	7.93956e-07	0.766449	protein_coding	TRUE
chr12	ENSG00000182993	cg23932063	rs10846062	C12orf60	-0.202215	0.0216397	9.21804e-21	0.616729	protein_coding	TRUE
chr12	ENSG00000182993	cg04671087	rs10846062	C12orf60	-0.131114	0.0141661	2.1322e-20	0.666949	protein_coding	TRUE
chr12	ENSG00000182993	cg11433727	rs10846062	C12orf60	0.145539	0.0239062	1.14388e-09	0.0239647	protein_coding	FALSE
chr12	ENSG00000151062	cg09709522	rs13219	CACNA2D4	0.00536663	0.00104622	2.9047e-07	0.126366	protein_coding	TRUE
chr12	ENSG00000110888	cg00001610	rs4931354	CAPRIN2	-0.0319836	0.00622421	2.76815e-07	0.0262281	protein_coding	FALSE
chr12	ENSG00000180881	cg07945177	rs11532496	CAPS2	-0.0448446	0.00909353	8.1605e-07	0.803942	protein_coding	TRUE
chr12	ENSG00000177875	cg12381317	rs34031535	CCDC184	0.66934	0.133335	5.16753e-07	0.287342	protein_coding	TRUE
chr12	ENSG00000139537	cg09384937	rs2070940	CCDC65	0.992132	0.197542	5.10343e-07		protein_coding	FALSE
chr12	ENSG00000120647	cg15496531	rs10774154	CCDC77	-1.0736	0.204146	1.44843e-07	0.884241	protein_coding	TRUE
chr12	ENSG00000139624	cg08189863	rs12369104	CERS5	-0.027561	0.00447749	7.48633e-10	0.0018766	protein_coding	FALSE
chr12	ENSG00000139624	cg27464657	rs12369104	CERS5	0.0177286	0.00304361	5.71647e-09	0.0031071	protein_coding	FALSE
chr12	ENSG00000139624	cg23440569	rs12369104	CERS5	0.0213921	0.00425041	4.82989e-07	2.8655e-05	protein_coding	FALSE
chr12	ENSG00000158023	cg23821619	rs12829688	CFAP251	-0.17178	0.0130031	7.61167e-40	0.652636	protein_coding	TRUE
chr12	ENSG00000158023	cg22168489	rs12829688	CFAP251	-0.0985814	0.00758406	1.24776e-38	0.766584	protein_coding	TRUE
chr12	ENSG00000158023	cg13699009	rs12829688	CFAP251	-0.163713	0.0127739	1.33056e-37	0.508074	protein_coding	TRUE
chr12	ENSG00000158023	cg10207240	rs12829688	CFAP251	-0.16312	0.0152232	8.63965e-27	0.113006	protein_coding	TRUE
chr12	ENSG00000158023	cg01765077	rs12829688	CFAP251	-0.113204	0.0106355	1.85971e-26	0.0500575	protein_coding	TRUE
chr12	ENSG00000158023	cg11867697	rs12829688	CFAP251	-0.244582	0.0239907	2.09009e-24	0.522108	protein_coding	TRUE
chr12	ENSG00000158023	cg22618164	rs12829688	CFAP251	-0.218485	0.0221703	6.52892e-23	0.531908	protein_coding	TRUE
chr12	ENSG00000158023	cg12705353	rs12829688	CFAP251	-0.124601	0.012695	9.70859e-23	0.0526661	protein_coding	TRUE
chr12	ENSG00000158023	cg21016266	rs12829688	CFAP251	-0.170626	0.0174853	1.70019e-22	0.0200378	protein_coding	FALSE
chr12	ENSG00000158023	cg21171335	rs12829688	CFAP251	-0.216373	0.0228858	3.24733e-21	0.358586	protein_coding	TRUE
chr12	ENSG00000158023	cg24339332	rs12829688	CFAP251	-0.0241457	0.004556	1.15955e-07	0.282489	protein_coding	TRUE
chr12	ENSG00000072609	cg09537870	rs146419925	CHFR	0.247028	0.0299315	1.54304e-16	0.29287	protein_coding	TRUE
chr12	ENSG00000072609	cg02243221	rs146419925	CHFR	0.251282	0.0310599	5.95458e-16	0.0864688	protein_coding	TRUE
chr12	ENSG00000072609	cg22149555	rs146419925	CHFR	0.219465	0.02723	7.64922e-16	0.267313	protein_coding	TRUE
chr12	ENSG00000072609	cg16020270	rs146419925	CHFR	0.198127	0.0247231	1.112e-15	0.242804	protein_coding	TRUE
chr12	ENSG00000072609	cg10388270	rs146419925	CHFR	0.272175	0.0339708	1.12817e-15	0.117089	protein_coding	TRUE
chr12	ENSG00000072609	cg05614952	rs146419925	CHFR	0.295666	0.0369105	1.14364e-15	0.103314	protein_coding	TRUE
chr12	ENSG00000072609	cg23058246	rs146419925	CHFR	0.254661	0.0326159	5.81657e-15	0.762895	protein_coding	TRUE
chr12	ENSG00000072609	cg03425615	rs146419925	CHFR	0.249165	0.0321156	8.60344e-15	0.541971	protein_coding	TRUE
chr12	ENSG00000072609	cg23470262	rs146419925	CHFR	0.206125	0.0265854	8.95172e-15	0.227059	protein_coding	TRUE
chr12	ENSG00000072609	cg08695912	rs146419925	CHFR	0.210576	0.0280593	6.15812e-14	0.850787	protein_coding	TRUE
chr12	ENSG00000072609	cg13046214	rs146419925	CHFR	0.273205	0.0369235	1.36978e-13	0.968031	protein_coding	TRUE
chr12	ENSG00000072609	cg20765580	rs146419925	CHFR	0.162756	0.0226217	6.26046e-13	0.987981	protein_coding	TRUE
chr12	ENSG00000072609	cg07052262	rs146419925	CHFR	0.168423	0.0236667	1.10753e-12	0.669913	protein_coding	TRUE
chr12	ENSG00000072609	cg16120883	rs146419925	CHFR	0.210283	0.0304078	4.66437e-12	0.999318	protein_coding	TRUE
chr12	ENSG00000072609	cg19837214	rs146419925	CHFR	0.115511	0.017216	1.95255e-11	0.971495	protein_coding	TRUE
chr12	ENSG00000072609	cg22844555	rs146419925	CHFR	0.1165	0.0177896	5.80236e-11	0.998623	protein_coding	TRUE
chr12	ENSG00000072609	cg08424446	rs146419925	CHFR	0.177148	0.0279057	2.17981e-10	0.974135	protein_coding	TRUE
chr12	ENSG00000072609	cg03538318	rs146419925	CHFR	0.128269	0.0208186	7.21558e-10	0.593211	protein_coding	TRUE
chr12	ENSG00000072609	cg16214937	rs146419925	CHFR	0.125906	0.0206589	1.0977e-09	0.981388	protein_coding	TRUE
chr12	ENSG00000072609	cg05625100	rs146419925	CHFR	0.260223	0.0431997	1.7046e-09	0.110619	protein_coding	TRUE
chr12	ENSG00000072609	cg14903202	rs146419925	CHFR	0.113285	0.0188843	1.98703e-09	0.965055	protein_coding	TRUE
chr12	ENSG00000072609	cg03279164	rs146419925	CHFR	0.090096	0.0160158	1.85032e-08	0.685231	protein_coding	TRUE
chr12	ENSG00000072609	cg08409956	rs146419925	CHFR	0.126781	0.0229612	3.36029e-08	0.671932	protein_coding	TRUE
chr12	ENSG00000072609	cg15108326	rs146419925	CHFR	0.108676	0.0200044	5.55433e-08	0.969323	protein_coding	TRUE
chr12	ENSG00000072609	cg14949892	rs146419925	CHFR	0.119602	0.0222187	7.32725e-08	0.53122	protein_coding	TRUE
chr12	ENSG00000072609	cg09904296	rs146419925	CHFR	-0.0747003	0.0139161	7.96545e-08	0.353632	protein_coding	TRUE
chr12	ENSG00000072609	cg13614819	rs146419925	CHFR	0.0991084	0.0188337	1.42281e-07	0.143917	protein_coding	TRUE
chr12	ENSG00000072609	cg16300310	rs146419925	CHFR	0.0942715	0.018424	3.10809e-07	0.955691	protein_coding	TRUE
chr12	ENSG00000072609	cg12532141	rs146419925	CHFR	0.0652437	0.0128934	4.18742e-07	0.761765	protein_coding	TRUE
chr12	ENSG00000111666	cg19388332	rs2559854	CHPT1	-0.240085	0.0337199	1.07958e-12	0.52317	protein_coding	TRUE
chr12	ENSG00000136026	cg13163660	rs61942136	CKAP4	-0.0439399	0.00616949	1.06264e-12	0.832227	protein_coding	TRUE
chr12	ENSG00000136026	cg13249833	rs61942136	CKAP4	-0.0487186	0.00743406	5.62327e-11	0.999439	protein_coding	TRUE
chr12	ENSG00000136026	cg09239756	rs61942136	CKAP4	-0.0308164	0.00587469	1.5575e-07	0.449424	protein_coding	TRUE
chr12	ENSG00000013573	cg20134045	rs55932975	DDX11	-0.064768	0.0117013	3.11037e-08	0.29354	protein_coding	TRUE
chr12	ENSG00000013573	cg00391247	rs55932975	DDX11	-0.0502124	0.0097446	2.56563e-07	0.139447	protein_coding	TRUE
chr12	ENSG00000013573	cg10580537	rs2374041	DDX11	-0.048689	0.0097338	5.67214e-07	0.178624	protein_coding	TRUE
chr12	ENSG00000111364	cg25710520	rs11615300	DDX55	-0.0562007	0.00711687	2.86076e-15	0.00297921	protein_coding	FALSE
chr12	ENSG00000111364	cg01110312	rs11615300	DDX55	-0.0613214	0.00904065	1.17828e-11	0.0565109	protein_coding	TRUE
chr12	ENSG00000111364	cg16376770	rs11615300	DDX55	0.0525695	0.00775419	1.20594e-11	0.0128564	protein_coding	FALSE
chr12	ENSG00000111364	cg21767912	rs11615300	DDX55	-0.0576065	0.00870911	3.72791e-11	0.24664	protein_coding	TRUE
chr12	ENSG00000111364	cg04140754	rs11615300	DDX55	-0.0338348	0.00541115	4.03165e-10	0.00160414	protein_coding	FALSE
chr12	ENSG00000111364	cg06735598	rs11615300	DDX55	0.0715908	0.0115631	5.96726e-10	0.00759113	protein_coding	FALSE
chr12	ENSG00000111364	cg00347921	rs11615300	DDX55	0.0747962	0.0125142	2.27384e-09	0.04825	protein_coding	FALSE
chr12	ENSG00000111364	cg23463787	rs11615300	DDX55	-0.0552831	0.00928907	2.65846e-09	0.0354435	protein_coding	FALSE
chr12	ENSG00000111364	cg07670188	rs74996347	DDX55	0.0688157	0.0116424	3.40452e-09	0.07472	protein_coding	TRUE
chr12	ENSG00000111364	cg07701786	rs35289859	DDX55	-0.113098	0.0200585	1.71646e-08	0.0280477	protein_coding	FALSE
chr12	ENSG00000111364	cg05384724	rs11615300	DDX55	0.032566	0.00654158	6.4143e-07	0.17911	protein_coding	TRUE
chr12	ENSG00000111364	cg22007326	rs74996347	DDX55	-0.0270538	0.00544659	6.79553e-07	0.275625	protein_coding	TRUE
chr12	ENSG00000010219	cg16064691	rs10492055	DYRK4	-0.122132	0.0248738	9.1055e-07	0.995345	protein_coding	TRUE
chr12	ENSG00000123427	cg08332726	rs3782130	EEF1AKMT3	-0.26781	0.0292402	5.2403e-20	0.226403	protein_coding	TRUE
chr12	ENSG00000123427	cg04478727	rs3782130	EEF1AKMT3	0.124433	0.0197878	3.20841e-10	0.896178	protein_coding	TRUE
chr12	ENSG00000123427	cg00677455	rs3782130	EEF1AKMT3	0.172897	0.0277151	4.4214e-10	0.000662351	protein_coding	FALSE
chr12	ENSG00000063046	cg27115361	rs4825	EIF4B	0.00511289	0.00100734	3.86232e-07	0.00428572	protein_coding	FALSE
chr12	ENSG00000185684	cg05134918	rs67591694	EP400P1	0.0999359	0.0162901	8.5284e-10	0.00773616	transcribed_unprocessed_pseudogene	FALSE
chr12	ENSG00000082805	cg07916784	rs12817140	ERC1	-0.273769	0.0348875	4.25447e-15	0.604847	protein_coding	TRUE
chr12	ENSG00000082805	cg07813377	rs12817140	ERC1	-0.151135	0.0205864	2.11251e-13	0.802561	protein_coding	TRUE
chr12	ENSG00000087502	cg12903224	rs10082956	ERGIC2	-0.219302	0.0318081	5.40372e-12	0.405995	protein_coding	TRUE
chr12	ENSG00000134285	cg09384937	rs2293449	FKBP11	0.274084	0.0327809	6.21409e-17	0.00692716	protein_coding	FALSE
chr12	ENSG00000134285	cg07373432	rs2293449	FKBP11	0.146257	0.0205898	1.21769e-12	0.144622	protein_coding	TRUE
chr12	ENSG00000134285	cg11208719	rs2293449	FKBP11	-0.152863	0.0221081	4.70059e-12	0.0554447	protein_coding	TRUE
chr12	ENSG00000134285	cg22514963	rs2293449	FKBP11	0.214654	0.0349871	8.50324e-10	0.0147565	protein_coding	FALSE
chr12	ENSG00000134285	cg03566156	rs2293449	FKBP11	-0.0590676	0.0111939	1.31482e-07	0.02409	protein_coding	FALSE
chr12	ENSG00000134285	cg13212803	rs2293449	FKBP11	0.0725928	0.0137648	1.33622e-07	0.108835	protein_coding	TRUE
chr12	ENSG00000134285	cg08958015	rs2293449	FKBP11	-0.08281	0.0158787	1.83665e-07	0.282679	protein_coding	TRUE
chr12	ENSG00000111432	cg15276256	rs1027558	FZD10	0.671203	0.114837	5.07098e-09	0.845714	protein_coding	TRUE
chr12	ENSG00000111432	cg22813950	rs1027558	FZD10	0.594421	0.104492	1.2805e-08	0.858936	protein_coding	TRUE
chr12	ENSG00000111432	cg23381749	rs1027558	FZD10	0.821695	0.146707	2.1322e-08	0.914965	protein_coding	TRUE
chr12	ENSG00000111432	cg19014435	rs1027558	FZD10	0.458299	0.0830549	3.42848e-08	0.737249	protein_coding	TRUE
chr12	ENSG00000111432	cg07742404	rs1027558	FZD10	0.628773	0.114093	3.56698e-08	0.895403	protein_coding	TRUE
chr12	ENSG00000111432	cg10195169	rs1027558	FZD10	0.439631	0.0808655	5.43147e-08	0.756398	protein_coding	TRUE
chr12	ENSG00000111432	cg19694010	rs1027558	FZD10	1.53905	0.283479	5.66233e-08	0.686647	protein_coding	TRUE
chr12	ENSG00000111432	cg22347212	rs1027558	FZD10	0.734278	0.135778	6.37619e-08	0.979113	protein_coding	TRUE
chr12	ENSG00000111432	cg19221542	rs1027558	FZD10	0.63193	0.121577	2.01693e-07	0.450264	protein_coding	TRUE
chr12	ENSG00000111432	cg23653492	rs1027558	FZD10	0.466692	0.0907837	2.73716e-07	0.729823	protein_coding	TRUE
chr12	ENSG00000111432	cg16498194	rs1027558	FZD10	0.305292	0.0597152	3.17993e-07	0.969453	protein_coding	TRUE
chr12	ENSG00000111432	cg04879750	rs1027558	FZD10	0.447916	0.0876265	3.19362e-07	0.547866	protein_coding	TRUE
chr12	ENSG00000111432	cg26147947	rs1027558	FZD10	0.536609	0.106894	5.16721e-07	0.320743	protein_coding	TRUE
chr12	ENSG00000111432	cg05533700	rs1027558	FZD10	0.421671	0.0846573	6.32834e-07	0.848972	protein_coding	TRUE
chr12	ENSG00000250208	cg15276256	rs7971170	FZD10-AS1	0.0871317	0.0129124	1.50006e-11	0.941282	lncRNA	TRUE
chr12	ENSG00000250208	cg22813950	rs7971170	FZD10-AS1	0.0742556	0.0116668	1.95712e-10	0.944079	lncRNA	TRUE
chr12	ENSG00000250208	cg19014435	rs7971170	FZD10-AS1	0.0595789	0.00939279	2.25267e-10	0.817202	lncRNA	TRUE
chr12	ENSG00000250208	cg10195169	rs7971170	FZD10-AS1	0.0571881	0.00915829	4.25402e-10	0.882995	lncRNA	TRUE
chr12	ENSG00000250208	cg19221542	rs7971170	FZD10-AS1	0.0871311	0.014	4.85736e-10	0.585439	lncRNA	TRUE
chr12	ENSG00000250208	cg07742404	rs7971170	FZD10-AS1	0.079835	0.0128321	4.9248e-10	0.582311	lncRNA	TRUE
chr12	ENSG00000250208	cg23653492	rs7971170	FZD10-AS1	0.0648046	0.0104767	6.18599e-10	0.578567	lncRNA	TRUE
chr12	ENSG00000250208	cg19694010	rs7971170	FZD10-AS1	0.197157	0.0319946	7.1741e-10	0.958164	lncRNA	TRUE
chr12	ENSG00000250208	cg23381749	rs7971170	FZD10-AS1	0.0991775	0.0162799	1.11494e-09	0.858361	lncRNA	TRUE
chr12	ENSG00000250208	cg26147947	rs7971170	FZD10-AS1	0.0749379	0.0123641	1.3533e-09	0.685644	lncRNA	TRUE
chr12	ENSG00000250208	cg22347212	rs7971170	FZD10-AS1	0.0918939	0.0152503	1.68385e-09	0.993854	lncRNA	TRUE
chr12	ENSG00000250208	cg04879750	rs7971170	FZD10-AS1	0.0577548	0.00995452	6.558e-09	0.897585	lncRNA	TRUE
chr12	ENSG00000250208	cg05533700	rs7971170	FZD10-AS1	0.054723	0.00964814	1.41251e-08	0.972893	lncRNA	TRUE
chr12	ENSG00000250208	cg05768824	rs7971170	FZD10-AS1	0.0759798	0.0135811	2.21228e-08	0.432964	lncRNA	TRUE
chr12	ENSG00000250208	cg16498194	rs7971170	FZD10-AS1	0.0368899	0.00669916	3.65734e-08	0.978794	lncRNA	TRUE
chr12	ENSG00000250208	cg07410604	rs7971170	FZD10-AS1	0.0491394	0.00970175	4.08393e-07	0.591727	lncRNA	TRUE
chr12	ENSG00000250208	cg01568919	rs7971170	FZD10-AS1	0.0556112	0.0110446	4.77529e-07	0.854694	lncRNA	TRUE
chr12	ENSG00000257218	cg01236616	rs540520	GATC	-0.195637	0.0269446	3.85133e-13	4.13048e-06	protein_coding	FALSE
chr12	ENSG00000257218	cg25605888	rs73403923	GATC	-0.0723196	0.00996142	3.8718e-13	0.605904	protein_coding	TRUE
chr12	ENSG00000257218	cg24309215	rs540520	GATC	-0.0868312	0.01215	8.89345e-13	0.382258	protein_coding	TRUE
chr12	ENSG00000257218	cg08221168	rs540520	GATC	-0.0817035	0.0123006	3.08968e-11	0.0956865	protein_coding	TRUE
chr12	ENSG00000257218	cg27489772	rs540520	GATC	-0.0936103	0.0153807	1.15603e-09	0.0767109	protein_coding	TRUE
chr12	ENSG00000257218	cg01363902	rs16950305	GATC	0.0247212	0.00487916	4.0479e-07	0.472591	protein_coding	TRUE
chr12	ENSG00000257698	cg02175503	rs10877037	GIHCG	-0.447747	0.074712	2.06029e-09	0.201384	lncRNA	TRUE
chr12	ENSG00000180481	cg21272279	rs3923914	GLIPR1L2	-0.125341	0.0168179	9.13587e-14	0.0660567	protein_coding	TRUE
chr12	ENSG00000180481	cg17050806	rs3923914	GLIPR1L2	-0.137393	0.020741	3.4911e-11	0.0170354	protein_coding	FALSE
chr12	ENSG00000180481	cg09171882	rs3923914	GLIPR1L2	0.0927119	0.0145587	1.91325e-10	0.080355	protein_coding	TRUE
chr12	ENSG00000180481	cg07311024	rs3923914	GLIPR1L2	-0.123136	0.0204771	1.81707e-09	0.0572915	protein_coding	TRUE
chr12	ENSG00000180481	cg15942481	rs3923914	GLIPR1L2	-0.0903577	0.0156398	7.5856e-09	0.0437371	protein_coding	FALSE
chr12	ENSG00000238105	cg00395697	rs12370772	GOLGA2P5	-0.0158033	0.00278552	1.39997e-08	0.771007	transcribed_unprocessed_pseudogene	TRUE
chr12	ENSG00000090615	cg09537870	rs61952781	GOLGA3	-0.0214885	0.00249766	7.73504e-18	0.786187	protein_coding	TRUE
chr12	ENSG00000090615	cg10388270	rs61952781	GOLGA3	-0.0238694	0.00284165	4.47096e-17	0.352894	protein_coding	TRUE
chr12	ENSG00000090615	cg02243221	rs61952781	GOLGA3	-0.0215531	0.00258698	7.99122e-17	0.552128	protein_coding	TRUE
chr12	ENSG00000090615	cg22149555	rs61952781	GOLGA3	-0.0188929	0.00226978	8.52879e-17	0.643334	protein_coding	TRUE
chr12	ENSG00000090615	cg16020270	rs61952781	GOLGA3	-0.0170709	0.00206156	1.22592e-16	0.52996	protein_coding	TRUE
chr12	ENSG00000090615	cg05614952	rs61952781	GOLGA3	-0.0252647	0.00307341	2.02794e-16	0.344292	protein_coding	TRUE
chr12	ENSG00000090615	cg23470262	rs61952781	GOLGA3	-0.0180112	0.00222455	5.65477e-16	0.368836	protein_coding	TRUE
chr12	ENSG00000090615	cg23058246	rs61952781	GOLGA3	-0.0219405	0.00272213	7.62657e-16	0.551709	protein_coding	TRUE
chr12	ENSG00000090615	cg03425615	rs61952781	GOLGA3	-0.0215559	0.00268278	9.36522e-16	0.87903	protein_coding	TRUE
chr12	ENSG00000090615	cg08695912	rs61952781	GOLGA3	-0.0181245	0.00234449	1.06968e-14	0.801153	protein_coding	TRUE
chr12	ENSG00000090615	cg13046214	rs61952781	GOLGA3	-0.0231457	0.00307932	5.62623e-14	0.805386	protein_coding	TRUE
chr12	ENSG00000090615	cg07052262	rs61952781	GOLGA3	-0.0145623	0.00198184	2.01374e-13	0.783899	protein_coding	TRUE
chr12	ENSG00000090615	cg20765580	rs61952781	GOLGA3	-0.0137839	0.00188832	2.8866e-13	0.809275	protein_coding	TRUE
chr12	ENSG00000090615	cg19837214	rs61952781	GOLGA3	-0.0101366	0.00144647	2.42066e-12	0.946832	protein_coding	TRUE
chr12	ENSG00000090615	cg16120883	rs61952781	GOLGA3	-0.0177076	0.00253965	3.11447e-12	0.795096	protein_coding	TRUE
chr12	ENSG00000090615	cg03538318	rs61952781	GOLGA3	-0.0115405	0.00175664	5.04399e-11	0.452185	protein_coding	TRUE
chr12	ENSG00000090615	cg22844555	rs61952781	GOLGA3	-0.00969468	0.00148632	6.90952e-11	0.668715	protein_coding	TRUE
chr12	ENSG00000090615	cg08424446	rs61952781	GOLGA3	-0.0152182	0.00234156	8.07617e-11	0.957843	protein_coding	TRUE
chr12	ENSG00000090615	cg05625100	rs61952781	GOLGA3	-0.0227841	0.00363581	3.69058e-10	0.0932526	protein_coding	TRUE
chr12	ENSG00000090615	cg16214937	rs61952781	GOLGA3	-0.0107734	0.00173434	5.23794e-10	0.5407	protein_coding	TRUE
chr12	ENSG00000090615	cg14903202	rs61952781	GOLGA3	-0.00940278	0.0015814	2.75034e-09	0.556391	protein_coding	TRUE
chr12	ENSG00000090615	cg09904296	rs61952781	GOLGA3	0.0067151	0.00117574	1.12069e-08	0.453104	protein_coding	TRUE
chr12	ENSG00000090615	cg08409956	rs61952781	GOLGA3	-0.0109316	0.00193257	1.54475e-08	0.786602	protein_coding	TRUE
chr12	ENSG00000090615	cg03279164	rs61952781	GOLGA3	-0.00754665	0.00134434	1.981e-08	0.594191	protein_coding	TRUE
chr12	ENSG00000090615	cg14949892	rs61952781	GOLGA3	-0.0102266	0.00186963	4.50403e-08	0.610201	protein_coding	TRUE
chr12	ENSG00000090615	cg12532141	rs61952781	GOLGA3	-0.00564174	0.00108684	2.09224e-07	0.654012	protein_coding	TRUE
chr12	ENSG00000090615	cg15108326	rs61952781	GOLGA3	-0.00866498	0.00167444	2.28073e-07	0.904989	protein_coding	TRUE
chr12	ENSG00000090615	cg13614819	rs61952781	GOLGA3	-0.0081219	0.00158065	2.77207e-07	0.048591	protein_coding	FALSE
chr12	ENSG00000090615	cg16300310	rs61952781	GOLGA3	-0.00794947	0.00155011	2.92339e-07	0.709114	protein_coding	TRUE
chr12	ENSG00000090615	cg14168939	rs61952781	GOLGA3	-0.00794493	0.00158489	5.36114e-07	0.693391	protein_coding	TRUE
chr12	ENSG00000090615	cg23149010	rs61952781	GOLGA3	-0.00604277	0.00121018	5.93674e-07	0.699473	protein_coding	TRUE
chr12	ENSG00000166130	cg21540775	rs12370618	IKBIP	0.135274	0.0198482	9.39938e-12	0.2044	protein_coding	TRUE
chr12	ENSG00000123411	cg26798185	rs773115	IKZF4	-0.684693	0.122959	2.57004e-08	0.043884	protein_coding	FALSE
chr12	ENSG00000133704	cg00001610	rs7311651	IPO8	-0.0506111	0.0090698	2.4028e-08	0.0888508	protein_coding	TRUE
chr12	ENSG00000118308	cg05257196	rs699032	IRAG2	-0.177062	0.0228109	8.34854e-15	0.358685	protein_coding	TRUE
chr12	ENSG00000118308	cg15460816	rs699032	IRAG2	-0.170454	0.0230385	1.37575e-13	0.192433	protein_coding	TRUE
chr12	ENSG00000118308	cg02873991	rs699032	IRAG2	-0.138724	0.0195437	1.26453e-12	0.470469	protein_coding	TRUE
chr12	ENSG00000123104	cg07645296	rs11048706	ITPR2	-0.0168592	0.00274687	8.37744e-10	0.457824	protein_coding	TRUE
chr12	ENSG00000123104	cg20787196	rs11048706	ITPR2	-0.0192095	0.00324956	3.39218e-09	0.775547	protein_coding	TRUE
chr12	ENSG00000123104	cg19407459	rs11048706	ITPR2	0.033371	0.0061257	5.10241e-08	0.011128	protein_coding	FALSE
chr12	ENSG00000123104	cg14081884	rs11048706	ITPR2	0.032297	0.00625607	2.43656e-07	0.00563225	protein_coding	FALSE
chr12	ENSG00000139620	cg10767920	rs7979508	KANSL2	-0.259707	0.0330077	3.60204e-15	0.198746	protein_coding	TRUE
chr12	ENSG00000139620	cg00366859	rs1863542	KANSL2	0.046323	0.00883067	1.55697e-07	0.436492	protein_coding	TRUE
chr12	ENSG00000110906	cg16434195	rs11611012	KCTD10	-0.0370132	0.00455597	4.5067e-16	0.190494	protein_coding	TRUE
chr12	ENSG00000110906	cg05360138	rs11611012	KCTD10	0.0654848	0.00824666	2.00942e-15	0.0433301	protein_coding	FALSE
chr12	ENSG00000110906	cg14859365	rs11611012	KCTD10	0.0670393	0.0111843	2.04686e-09	0.100927	protein_coding	TRUE
chr12	ENSG00000110906	cg07719172	rs11611012	KCTD10	-0.0433223	0.00755243	9.68182e-09	0.625677	protein_coding	TRUE
chr12	ENSG00000134545	cg02630277	rs59007580	KLRC1	-0.584139	0.0765445	2.32281e-14	0.388958	protein_coding	TRUE
chr12	ENSG00000134545	cg17364872	rs59007580	KLRC1	-0.471458	0.0795771	3.13183e-09	0.537739	protein_coding	TRUE
chr12	ENSG00000213809	cg02630277	rs59007580	KLRK1	-0.581638	0.0713635	3.62842e-16	0.918282	protein_coding	TRUE
chr12	ENSG00000213809	cg17364872	rs59007580	KLRK1	-0.469439	0.0762355	7.37841e-10	0.398873	protein_coding	TRUE
chr12	ENSG00000247157	cg27095718	rs10772397	LINC01252	0.697056	0.0694089	9.88811e-24	0.397709	lncRNA	TRUE
chr12	ENSG00000247157	cg21216543	rs10772397	LINC01252	-0.314559	0.036772	1.18583e-17	0.115582	lncRNA	TRUE
chr12	ENSG00000247157	cg17741383	rs10772397	LINC01252	0.460941	0.0610522	4.35424e-14	0.739855	lncRNA	TRUE
chr12	ENSG00000247157	cg17637969	rs10772397	LINC01252	-0.21526	0.0381479	1.67313e-08	0.107453	lncRNA	TRUE
chr12	ENSG00000247157	cg16709841	rs10772397	LINC01252	0.436919	0.0832265	1.52295e-07	0.751916	lncRNA	TRUE
chr12	ENSG00000256576	cg06532071	rs6598204	LINC02361	-0.975379	0.0982711	3.22848e-23	0.875289	lncRNA	TRUE
chr12	ENSG00000256576	cg07293736	rs6598204	LINC02361	0.762712	0.0832263	4.98612e-20	0.716441	lncRNA	TRUE
chr12	ENSG00000256576	cg21858108	rs6598204	LINC02361	0.662284	0.0824863	9.82591e-16	0.735	lncRNA	TRUE
chr12	ENSG00000256576	cg00155535	rs6598204	LINC02361	0.753803	0.0994025	3.36773e-14	0.216876	lncRNA	TRUE
chr12	ENSG00000256576	cg00368532	rs6598204	LINC02361	-0.474547	0.0683702	3.89739e-12	0.953891	lncRNA	TRUE
chr12	ENSG00000256576	cg27301488	rs6598204	LINC02361	0.424605	0.0654407	8.67542e-11	0.233948	lncRNA	TRUE
chr12	ENSG00000256576	cg09889491	rs6598204	LINC02361	0.2989	0.0496705	1.76954e-09	0.514674	lncRNA	TRUE
chr12	ENSG00000256576	cg03209332	rs6598204	LINC02361	0.3001	0.0500132	1.96812e-09	0.516202	lncRNA	TRUE
chr12	ENSG00000256576	cg10650853	rs6598204	LINC02361	0.290058	0.0511202	1.39479e-08	0.0935628	lncRNA	TRUE
chr12	ENSG00000256576	cg14525755	rs6598204	LINC02361	0.241909	0.0477673	4.09866e-07	0.0796863	lncRNA	TRUE
chr12	ENSG00000256576	cg12384790	rs11246984	LINC02361	1.03798	0.208251	6.21938e-07	0.669445	lncRNA	TRUE
chr12	ENSG00000010626	cg01097940	rs12831467	LRRC23	0.0240138	0.00248678	4.61044e-22	0.392707	protein_coding	TRUE
chr12	ENSG00000010626	cg26269324	rs12831467	LRRC23	0.022597	0.00248049	8.24656e-20	0.0784404	protein_coding	TRUE
chr12	ENSG00000010626	cg25162631	rs12831467	LRRC23	-0.0389608	0.00443695	1.62034e-18	0.431993	protein_coding	TRUE
chr12	ENSG00000010626	cg15411984	rs12831467	LRRC23	0.0655315	0.00807174	4.7145e-16	0.436777	protein_coding	TRUE
chr12	ENSG00000010626	cg17476499	rs12831467	LRRC23	0.0622167	0.0078355	2.01602e-15	0.410235	protein_coding	TRUE
chr12	ENSG00000010626	cg26229977	rs12831467	LRRC23	0.0402199	0.00625382	1.26556e-10	0.595939	protein_coding	TRUE
chr12	ENSG00000010626	cg08099141	rs12831467	LRRC23	0.0191917	0.00321042	2.25998e-09	0.720688	protein_coding	TRUE
chr12	ENSG00000010626	cg14593550	rs12831467	LRRC23	0.0302985	0.0051938	5.42466e-09	0.620521	protein_coding	TRUE
chr12	ENSG00000010626	cg23412654	rs12831467	LRRC23	-0.0201674	0.00356886	1.59577e-08	0.716336	protein_coding	TRUE
chr12	ENSG00000010626	cg03393638	rs12831467	LRRC23	0.0376354	0.00699262	7.35988e-08	0.416017	protein_coding	TRUE
chr12	ENSG00000010626	cg25316512	rs12831467	LRRC23	-0.0160497	0.00317388	4.2636e-07	0.726853	protein_coding	TRUE
chr12	ENSG00000090382	cg11871910	rs7959452	LYZ	-0.19076	0.0313063	1.10575e-09	0.138462	protein_coding	TRUE
chr12	ENSG00000090382	cg22834771	rs7959452	LYZ	0.0619742	0.0115757	8.61143e-08	0.175462	protein_coding	TRUE
chr12	ENSG00000089022	cg27393610	rs76443341	MAPKAPK5	0.0984527	0.0134041	2.05772e-13	0.0481187	protein_coding	FALSE
chr12	ENSG00000089022	cg25567085	rs76443341	MAPKAPK5	0.0423775	0.00813457	1.89299e-07	0.831037	protein_coding	TRUE
chr12	ENSG00000089022	cg11972180	rs76443341	MAPKAPK5	-0.0456936	0.00898021	3.61378e-07	0.00379685	protein_coding	FALSE
chr12	ENSG00000182544	cg27467734	rs148152366	MFSD5	0.0998543	0.0151376	4.21171e-11	0.279693	protein_coding	TRUE
chr12	ENSG00000198598	cg10890403	rs10751704	MMP17	2.60434	0.513053	3.85121e-07		protein_coding	FALSE
chr12	ENSG00000198598	cg02473606	rs10751704	MMP17	2.22501	0.44769	6.69576e-07		protein_coding	FALSE
chr12	ENSG00000198598	cg15454599	rs10751704	MMP17	2.6951	0.545715	7.866e-07		protein_coding	FALSE
chr12	ENSG00000051825	cg04180275	rs1727294	MPHOSPH9	0.0415975	0.00443626	6.80668e-21	0.0186311	protein_coding	FALSE
chr12	ENSG00000051825	cg07644039	rs1727294	MPHOSPH9	0.0283893	0.00345621	2.13937e-16	0.045698	protein_coding	FALSE
chr12	ENSG00000051825	cg21745287	rs1727294	MPHOSPH9	0.040679	0.00526335	1.0862e-14	0.0478503	protein_coding	FALSE
chr12	ENSG00000051825	cg00376283	rs1727294	MPHOSPH9	-0.045496	0.00604453	5.19914e-14	0.0312922	protein_coding	FALSE
chr12	ENSG00000051825	cg02390806	rs1727294	MPHOSPH9	0.0437434	0.00591199	1.37112e-13	0.0383325	protein_coding	FALSE
chr12	ENSG00000051825	cg01030110	rs1727294	MPHOSPH9	0.0262689	0.00380851	5.29576e-12	0.159345	protein_coding	TRUE
chr12	ENSG00000051825	cg22341471	rs1727294	MPHOSPH9	-0.0160581	0.00258658	5.35837e-10	0.933397	protein_coding	TRUE
chr12	ENSG00000051825	cg16697799	rs1727294	MPHOSPH9	0.0303488	0.00495052	8.76476e-10	0.407814	protein_coding	TRUE
chr12	ENSG00000051825	cg14409041	rs1727294	MPHOSPH9	0.0703457	0.0115113	9.89879e-10	0.0485592	protein_coding	FALSE
chr12	ENSG00000051825	cg02203224	rs1727294	MPHOSPH9	0.0344748	0.00575673	2.11655e-09	0.116551	protein_coding	TRUE
chr12	ENSG00000051825	cg00585698	rs1727294	MPHOSPH9	0.0201149	0.00341508	3.86115e-09	0.321537	protein_coding	TRUE
chr12	ENSG00000051825	cg01492050	rs1727294	MPHOSPH9	0.0349404	0.00608257	9.2279e-09	0.0273804	protein_coding	FALSE
chr12	ENSG00000051825	cg26705986	rs1727294	MPHOSPH9	0.0322565	0.00583934	3.31378e-08	0.334767	protein_coding	TRUE
chr12	ENSG00000051825	cg05968312	rs1727294	MPHOSPH9	-0.0224238	0.00427035	1.51236e-07	0.012781	protein_coding	FALSE
chr12	ENSG00000177406	cg08089041	rs61916675	NINJ2-AS1	-0.170269	0.0283043	1.79154e-09	0.861218	lncRNA	TRUE
chr12	ENSG00000177406	cg20781967	rs61916675	NINJ2-AS1	0.197925	0.0345953	1.05796e-08	0.0128978	lncRNA	FALSE
chr12	ENSG00000111696	cg15124019	rs17034648	NT5DC3	-0.0602022	0.0121971	7.98313e-07	0.445515	protein_coding	TRUE
chr12	ENSG00000111581	cg14121014	rs2431655	NUP107	-0.0604137	0.00825239	2.46572e-13	0.988599	protein_coding	TRUE
chr12	ENSG00000182379	cg06600276	rs10876967	NXPH4	0.295467	0.0533817	3.11256e-08	0.595548	protein_coding	TRUE
chr12	ENSG00000182379	cg10701104	rs10876967	NXPH4	-0.555293	0.100949	3.7822e-08	0.136398	protein_coding	TRUE
chr12	ENSG00000182379	cg04093168	rs10876967	NXPH4	-0.385982	0.0713033	6.18912e-08	0.164184	protein_coding	TRUE
chr12	ENSG00000182379	cg09093210	rs10876967	NXPH4	0.277043	0.0512777	6.56098e-08	0.168774	protein_coding	TRUE
chr12	ENSG00000182379	cg02675634	rs10876967	NXPH4	-0.470805	0.0880603	8.97249e-08	0.171249	protein_coding	TRUE
chr12	ENSG00000182379	cg23853145	rs10876967	NXPH4	-0.398825	0.0757869	1.42148e-07	0.101735	protein_coding	TRUE
chr12	ENSG00000182379	cg01606023	rs10876967	NXPH4	-0.378446	0.0722852	1.64573e-07	0.120254	protein_coding	TRUE
chr12	ENSG00000182379	cg11505661	rs10876967	NXPH4	0.306238	0.0598248	3.07288e-07	0.17521	protein_coding	TRUE
chr12	ENSG00000182379	cg03921149	rs10876967	NXPH4	-0.345816	0.0681238	3.84873e-07	0.268659	protein_coding	TRUE
chr12	ENSG00000182379	cg04850731	rs10876967	NXPH4	0.340085	0.0681381	6.00322e-07	0.413097	protein_coding	TRUE
chr12	ENSG00000182379	cg13764877	rs10876967	NXPH4	-0.272811	0.0554599	8.6953e-07	0.0988627	protein_coding	TRUE
chr12	ENSG00000255642	cg00320902	rs56296546	PABPC1P4	0.918102	0.170987	7.89881e-08	0.0480841	processed_pseudogene	FALSE
chr12	ENSG00000255642	cg15851904	rs56296546	PABPC1P4	-0.60159	0.122508	9.0791e-07	0.324413	processed_pseudogene	TRUE
[truncated: 5,870 more rows]
