# Supplementary material for: QTL mapping of human retina DNA methylation identifies 87 gene-epigenome interactions in age-related macular degeneration
Source: Nat Commun. 2024 Mar 4;15:1972. doi: 10.1038/s41467-024-46063-8 (PMC10912779; doi:10.1038/s41467-024-46063-8)
Supplement: Supplementary file 17 — Supplementary Data 14 [file 41467_2024_46063_MOESM17_ESM.xlsx]

## Sheet: Sheet1
chr	exposure	trait	top_snp	Gene_symbol	bxy	bxy_se	bxy_pval	heidi_pval	Biotype	HEIDI_Pvalue_Significant
chr1	cg15633699	ENSG00000235098	rs1781133	ANKRD65	-2.92218	0.555611	1.4452e-07	0.998728	protein_coding	TRUE
chr1	cg13017573	ENSG00000204624	rs2922243	DISP3	39.1647	4.61569	2.15497e-17	0.998607	protein_coding	TRUE
chr1	cg14867388	ENSG00000134198	rs10458452	TSPAN2	1.57343	0.311392	4.35181e-07	0.995837	protein_coding	TRUE
chr1	cg09082263	ENSG00000159208	rs834239	CIART	-17.1749	2.33926	2.10387e-13	0.988919	protein_coding	TRUE
chr1	cg25149551	ENSG00000132694	rs868187	ARHGEF11	24.1735	4.12394	4.58022e-09	0.987352	protein_coding	TRUE
chr1	cg23752735	ENSG00000162620	rs571848	LRRIQ3	-6.81576	1.08074	2.85245e-10	0.984562	protein_coding	TRUE
chr1	cg10483611	ENSG00000162461	rs7539884	SLC25A34	-4.74818	0.552077	7.9323e-18	0.98456	protein_coding	TRUE
chr1	cg03837750	ENSG00000254685	rs71798754	FPGT	-7.55615	1.47079	2.78447e-07	0.980998	protein_coding	TRUE
chr1	cg10768996	ENSG00000133069	rs1172113	TMCC2	-20.7659	3.75326	3.15234e-08	0.978877	protein_coding	TRUE
chr1	cg16348003	ENSG00000188643	rs11548102	S100A16	2.84141	0.569955	6.18613e-07	0.973485	protein_coding	TRUE
chr1	cg14980620	ENSG00000160781	rs7512751	PAQR6	-26.4689	5.18226	3.26281e-07	0.972727	protein_coding	TRUE
chr1	cg22956858	ENSG00000162461	rs7539884	SLC25A34	-1.59525	0.155704	1.24087e-24	0.961672	protein_coding	TRUE
chr1	cg01169725	ENSG00000143162	rs1043310	CREG1	-74.3225	13.3673	2.69735e-08	0.961025	protein_coding	TRUE
chr1	cg11803389	ENSG00000132763	rs2991966	MMACHC	-2.20068	0.399752	3.68921e-08	0.960745	protein_coding	TRUE
chr1	cg11586189	ENSG00000198892	rs4025034	SHISA4	-6.24908	0.997177	3.68608e-10	0.958792	protein_coding	TRUE
chr1	cg07532960	ENSG00000242349	rs198365	NPPA-AS1	-3.52726	0.562972	3.7181e-10	0.958654	antisense	TRUE
chr1	cg03420647	ENSG00000162461	rs7539884	SLC25A34	-1.49578	0.135347	2.15703e-28	0.951451	protein_coding	TRUE
chr1	cg04205689	ENSG00000231663	rs149229387	RP5-827C21.4	3.94761	0.713097	3.09702e-08	0.950851	antisense	TRUE
chr1	cg24323958	ENSG00000085491	rs72693452	SLC25A24	-12.007	1.99086	1.62871e-09	0.949519	protein_coding	TRUE
chr1	cg20584566	ENSG00000132694	rs868187	ARHGEF11	7.99618	1.20667	3.43381e-11	0.94851	protein_coding	TRUE
chr1	cg16924704	ENSG00000189266	rs75910560	PNRC2	-22.0204	3.36129	5.7084e-11	0.940071	protein_coding	TRUE
chr1	cg00857998	ENSG00000133059	rs11577406	DSTYK	30.6444	6.09096	4.87591e-07	0.93755	protein_coding	TRUE
chr1	cg06775570	ENSG00000198892	rs11589881	SHISA4	-6.35056	1.01477	3.89655e-10	0.933184	protein_coding	TRUE
chr1	cg00042356	ENSG00000116288	rs7517357	PARK7	13.8856	2.16127	1.32078e-10	0.932583	protein_coding	TRUE
chr1	cg13387374	ENSG00000127463	rs3748757	EMC1	-88.6397	16.7572	1.22554e-07	0.930685	protein_coding	TRUE
chr1	cg04788705	ENSG00000204624	rs3124627	DISP3	-48.1021	7.73511	5.01376e-10	0.924367	protein_coding	TRUE
chr1	cg03748376	ENSG00000196071	rs61857507	OR2L13	-1.19544	0.19678	1.23984e-09	0.923745	protein_coding	TRUE
chr1	cg26204283	ENSG00000000457	rs79945836	SCYL3	-4.00036	0.807218	7.20567e-07	0.922803	protein_coding	TRUE
chr1	cg02855983	ENSG00000081277	rs199660508	PKP1	-182.645	33.0831	3.37508e-08	0.92124	protein_coding	TRUE
chr1	cg03851496	ENSG00000266472	rs10712406	MRPS21	-14.4073	2.83983	3.90996e-07	0.920869	protein_coding	TRUE
chr1	cg02331910	ENSG00000189171	rs999418	S100A13	9.30076	1.79322	2.14141e-07	0.912344	protein_coding	TRUE
chr1	cg13218558	ENSG00000204624	rs3099630	DISP3	43.9708	6.94223	2.39173e-10	0.911584	protein_coding	TRUE
chr1	cg05454848	ENSG00000204624	rs3124627	DISP3	-5.31045	0.350143	5.89056e-52	0.911053	protein_coding	TRUE
chr1	cg22614927	ENSG00000179163	rs12133557	FUCA1	3.24294	0.657897	8.25446e-07	0.910996	protein_coding	TRUE
chr1	cg01347250	ENSG00000271853	rs35890519	RP1-178F15.5	-0.750328	0.135485	3.05786e-08	0.909128	processed_transcript	TRUE
chr1	cg13416772	ENSG00000204624	rs3124627	DISP3	-10.1406	0.756046	5.09553e-41	0.908963	protein_coding	TRUE
chr1	cg23975251	ENSG00000142655	rs202087283	PEX14	-12.2757	1.65117	1.04939e-13	0.904104	protein_coding	TRUE
chr1	cg11983977	ENSG00000131791	rs147318064	PRKAB2	9.69675	1.86295	1.93945e-07	0.898995	protein_coding	TRUE
chr1	cg20921146	ENSG00000204624	rs3124627	DISP3	-4.81653	0.319209	1.91513e-51	0.89796	protein_coding	TRUE
chr1	cg27469660	ENSG00000271853	rs35890519	RP1-178F15.5	-0.98454	0.198873	7.39823e-07	0.896769	processed_transcript	TRUE
chr1	cg15374471	ENSG00000270605	rs2938867	RP5-1092A3.4	-68.9784	10.8202	1.82992e-10	0.892746	antisense	TRUE
chr1	cg09122657	ENSG00000049239	rs11121349	H6PD	-17.5832	2.35574	8.39351e-14	0.890154	protein_coding	TRUE
chr1	cg25763306	ENSG00000270035	rs12747548	RP11-338N10.2	-1.12179	0.161553	3.81764e-12	0.886751	lincRNA	TRUE
chr1	cg23589174	ENSG00000204624	rs3124627	DISP3	-6.56426	0.458383	1.6304e-46	0.883443	protein_coding	TRUE
chr1	cg03837750	ENSG00000162620	rs71798754	LRRIQ3	-5.13803	0.781311	4.82733e-11	0.882024	protein_coding	TRUE
chr1	cg23863608	ENSG00000142655	rs202087283	PEX14	-15.1069	1.76234	1.01633e-17	0.880154	protein_coding	TRUE
chr1	cg01557798	ENSG00000181873	rs6682260	IBA57	-6.6269	1.34219	7.91769e-07	0.877403	protein_coding	TRUE
chr1	cg11915664	ENSG00000271853	rs9729773	RP1-178F15.5	-0.983571	0.180941	5.45275e-08	0.872037	processed_transcript	TRUE
chr1	cg23752735	ENSG00000254685	rs571848	FPGT	-9.85196	1.98377	6.82459e-07	0.868695	protein_coding	TRUE
chr1	cg10276597	ENSG00000204624	rs3124627	DISP3	-10.014	0.754673	3.48528e-40	0.865558	protein_coding	TRUE
chr1	cg11731300	ENSG00000215845	rs4617422	TSTD1	-1.67513	0.322117	1.98888e-07	0.863804	protein_coding	TRUE
chr1	cg19025525	ENSG00000181873	rs10916277	IBA57	-1.94101	0.380379	3.3462e-07	0.862825	protein_coding	TRUE
chr1	cg24880665	ENSG00000228288	rs34765241	PCAT6	-6.84119	1.27946	8.94654e-08	0.861378	antisense	TRUE
chr1	cg24846680	ENSG00000154358	rs10916277	OBSCN	-9.89265	1.64335	1.74633e-09	0.85978	protein_coding	TRUE
chr1	cg17936236	ENSG00000143162	rs16859185	CREG1	-41.17	5.03608	2.95851e-16	0.859299	protein_coding	TRUE
chr1	cg24596570	ENSG00000117640	rs2280997	MTFR1L	-24.2429	2.97081	3.34047e-16	0.859266	protein_coding	TRUE
chr1	cg16724148	ENSG00000162688	rs71660907	AGL	-97.2834	18.601	1.69491e-07	0.857441	protein_coding	TRUE
chr1	cg12944311	ENSG00000142655	rs1411402	PEX14	-17.6479	2.55461	4.90633e-12	0.855245	protein_coding	TRUE
chr1	cg12611449	ENSG00000081277	rs10753898	PKP1	-178.964	33.9602	1.36568e-07	0.854142	protein_coding	TRUE
chr1	cg13900770	ENSG00000162620	rs571848	LRRIQ3	-3.02603	0.526756	9.21081e-09	0.853802	protein_coding	TRUE
chr1	cg10385390	ENSG00000116288	rs200968609	PARK7	-29.8302	5.94129	5.14466e-07	0.852749	protein_coding	TRUE
chr1	cg17028912	ENSG00000204624	rs3124627	DISP3	-18.0643	2.09363	6.23154e-18	0.852362	protein_coding	TRUE
chr1	cg08518475	ENSG00000117602	rs195707	RCAN3	-25.1831	2.46295	1.53614e-24	0.84938	protein_coding	TRUE
chr1	cg01849851	ENSG00000142655	rs35502618	PEX14	-9.28954	1.21953	2.59004e-14	0.846979	protein_coding	TRUE
chr1	cg05639522	ENSG00000169224	rs12404733	GCSAML	-1.05223	0.194155	5.97608e-08	0.838498	protein_coding	TRUE
chr1	cg02873163	ENSG00000189171	rs35760493	S100A13	6.51571	1.32519	8.79642e-07	0.835835	protein_coding	TRUE
chr1	cg06600967	ENSG00000143578	rs4845586	CREB3L4	-4.3553	0.832283	1.66817e-07	0.835261	protein_coding	TRUE
chr1	cg26899948	ENSG00000197429	rs3013594	IPP	-4.09441	0.426952	8.81955e-22	0.833752	protein_coding	TRUE
chr1	cg06750292	ENSG00000198892	rs35915960	SHISA4	-2.86816	0.368297	6.82739e-15	0.829698	protein_coding	TRUE
chr1	cg05582926	ENSG00000198892	rs67531894	SHISA4	-3.94141	0.610585	1.08121e-10	0.829218	protein_coding	TRUE
chr1	cg00888758	ENSG00000237975	rs4845425	FLG-AS1	4.05402	0.653424	5.49519e-10	0.829026	antisense	TRUE
chr1	cg24296786	ENSG00000117448	rs2356551	AKR1A1	-7.05492	1.39654	4.3782e-07	0.828905	protein_coding	TRUE
chr1	cg08944170	ENSG00000196071	rs61857507	OR2L13	-1.1855	0.189753	4.16808e-10	0.827589	protein_coding	TRUE
chr1	cg12806121	ENSG00000142655	rs2483677	PEX14	-13.1072	1.5693	6.69619e-17	0.824361	protein_coding	TRUE
chr1	cg12567310	ENSG00000163382	rs3795727	NAXE	2.83244	0.541141	1.65701e-07	0.823821	protein_coding	TRUE
chr1	cg08027640	ENSG00000116288	rs7517357	PARK7	5.2767	0.786021	1.90434e-11	0.823589	protein_coding	TRUE
chr1	cg15920552	ENSG00000066136	rs12743517	NFYC	6.42039	1.06905	1.90524e-09	0.822082	protein_coding	TRUE
chr1	cg02713706	ENSG00000169224	rs12408686	GCSAML	-0.584279	0.10573	3.27364e-08	0.820677	protein_coding	TRUE
chr1	cg01561528	ENSG00000163382	rs3795727	NAXE	6.01032	0.894687	1.84494e-11	0.816767	protein_coding	TRUE
chr1	cg18759728	ENSG00000142856	rs1701534	ITGB3BP	-6.88792	1.23194	2.25632e-08	0.815896	protein_coding	TRUE
chr1	cg14966878	ENSG00000204624	rs1806619	DISP3	-5.38803	0.377669	3.53611e-46	0.815678	protein_coding	TRUE
chr1	cg03851496	ENSG00000159208	rs10712406	CIART	30.0385	5.70292	1.38507e-07	0.815159	protein_coding	TRUE
chr1	cg06600287	ENSG00000121310	rs36122767	ECHDC2	-38.0532	7.13614	9.68935e-08	0.813901	protein_coding	TRUE
chr1	cg20507276	ENSG00000196071	rs61857507	OR2L13	-1.39967	0.219181	1.70375e-10	0.811	protein_coding	TRUE
chr1	cg04964007	ENSG00000280670	rs111971542	CCDC163P	18.6266	3.4871	9.21464e-08	0.810603	protein_coding	TRUE
chr1	cg08477332	ENSG00000188643	rs9726753	S100A16	0.823491	0.153816	8.6152e-08	0.809714	protein_coding	TRUE
chr1	cg21906852	ENSG00000116791	rs6662846	CRYZ	7.72427	1.46132	1.25143e-07	0.808214	protein_coding	TRUE
chr1	cg22374474	ENSG00000169224	rs12404733	GCSAML	-1.24936	0.224899	2.77308e-08	0.806393	protein_coding	TRUE
chr1	cg03386086	ENSG00000204624	rs3124627	DISP3	30.3333	4.10615	1.49849e-13	0.80306	protein_coding	TRUE
chr1	cg26643377	ENSG00000204624	rs12048424	DISP3	52.1659	9.52349	4.31134e-08	0.802237	protein_coding	TRUE
chr1	cg24268531	ENSG00000163382	rs3795727	NAXE	3.95372	0.588621	1.85611e-11	0.800306	protein_coding	TRUE
chr1	cg10205764	ENSG00000117305	rs59640963	HMGCL	4.16327	0.79721	1.76714e-07	0.799343	protein_coding	TRUE
chr1	cg03123370	ENSG00000132763	rs2991966	MMACHC	1.43715	0.242436	3.06712e-09	0.796332	protein_coding	TRUE
chr1	cg09167911	ENSG00000116171	rs534070	SCP2	-35.2171	6.93218	3.76963e-07	0.796033	protein_coding	TRUE
chr1	cg08130307	ENSG00000159208	rs1776270	CIART	16.7452	2.33631	7.64496e-13	0.793114	protein_coding	TRUE
chr1	cg07174997	ENSG00000152061	rs11489771	RABGAP1L	-16.4188	3.2789	5.51673e-07	0.790806	protein_coding	TRUE
chr1	cg18801370	ENSG00000143442	rs12071705	POGZ	-27.3201	4.27921	1.72088e-10	0.785515	protein_coding	TRUE
chr1	cg24920358	ENSG00000084072	rs1046988	PPIE	12.4446	1.13087	3.63787e-28	0.78421	protein_coding	TRUE
chr1	cg10234330	ENSG00000224358	rs7518099	RP11-466F5.8	-1.22431	0.220883	2.97673e-08	0.783345	antisense	TRUE
chr1	cg20411340	ENSG00000176022	rs77994686	B3GALT6	1.88231	0.25234	8.69076e-14	0.781343	protein_coding	TRUE
chr1	cg00843917	ENSG00000116514	rs194644	RNF19B	-17.273	2.68431	1.23635e-10	0.780739	protein_coding	TRUE
chr1	cg20771596	ENSG00000169224	rs12404733	GCSAML	-0.540147	0.0952441	1.41808e-08	0.773248	protein_coding	TRUE
chr1	cg20012024	ENSG00000215845	rs4617422	TSTD1	3.34351	0.657551	3.68008e-07	0.762239	protein_coding	TRUE
chr1	cg16057915	ENSG00000142655	rs202087283	PEX14	-16.7934	3.24099	2.20029e-07	0.759994	protein_coding	TRUE
chr1	cg07302580	ENSG00000081277	rs11801270	PKP1	-129.197	22.8339	1.53052e-08	0.758408	protein_coding	TRUE
chr1	cg23594461	ENSG00000081248	rs2281845	CACNA1S	-6.80111	1.15363	3.73773e-09	0.755695	protein_coding	TRUE
chr1	cg10580513	ENSG00000196071	rs61857507	OR2L13	4.50901	0.841855	8.50664e-08	0.753235	protein_coding	TRUE
chr1	cg09506600	ENSG00000196071	rs61857507	OR2L13	-1.73467	0.244829	1.38819e-12	0.748799	protein_coding	TRUE
chr1	cg26449961	ENSG00000142856	rs71701980	ITGB3BP	-6.18198	1.15799	9.37079e-08	0.748577	protein_coding	TRUE
chr1	cg27517652	ENSG00000116199	rs7515519	FAM20B	-128.382	26.004	7.93285e-07	0.745383	protein_coding	TRUE
chr1	cg24846680	ENSG00000181873	rs10916277	IBA57	4.30482	0.716686	1.89493e-09	0.739298	protein_coding	TRUE
chr1	cg18879300	ENSG00000117115	rs910223	PADI2	-209.369	35.5223	3.7692e-09	0.737645	protein_coding	TRUE
chr1	cg13294652	ENSG00000154358	rs489926	OBSCN	3.72134	0.572455	7.99589e-11	0.732575	protein_coding	TRUE
chr1	cg27469660	ENSG00000189171	rs35890519	S100A13	8.10961	1.47339	3.71166e-08	0.732192	protein_coding	TRUE
chr1	cg08700651	ENSG00000185436	rs12094257	IFNLR1	-6.1826	1.25886	9.04921e-07	0.727267	protein_coding	TRUE
chr1	cg17858364	ENSG00000223745	rs59399616	CCDC18-AS1	89.8267	17.7832	4.39045e-07	0.726647	processed_transcript	TRUE
chr1	cg00735267	ENSG00000163382	rs7536235	NAXE	6.7678	0.996387	1.10325e-11	0.722421	protein_coding	TRUE
chr1	cg04077668	ENSG00000271853	rs9729773	RP1-178F15.5	-1.03076	0.185786	2.88733e-08	0.722071	processed_transcript	TRUE
chr1	cg10120255	ENSG00000116514	rs35049190	RNF19B	-16.9461	2.48983	1.0027e-11	0.720405	protein_coding	TRUE
chr1	cg00410788	ENSG00000198892	rs67531894	SHISA4	-3.16041	0.432377	2.68364e-13	0.715508	protein_coding	TRUE
chr1	cg10640435	ENSG00000163382	rs11576266	NAXE	10.486	2.13222	8.74851e-07	0.714441	protein_coding	TRUE
chr1	cg19948045	ENSG00000143162	rs10918711	CREG1	-66.6942	10.2775	8.62004e-11	0.714155	protein_coding	TRUE
chr1	cg11161846	ENSG00000158769	rs11588189	F11R	5.19432	1.04803	7.18589e-07	0.712488	protein_coding	TRUE
chr1	cg21917976	ENSG00000180867	rs12092016	PDIA3P1	-2.32893	0.460443	4.23642e-07	0.709883	processed_pseudogene	TRUE
chr1	cg23028721	ENSG00000196071	rs6701018	OR2L13	5.50445	1.05593	1.859e-07	0.709214	protein_coding	TRUE
chr1	cg22358066	ENSG00000189266	rs140748141	PNRC2	-33.5527	4.93143	1.01869e-11	0.708658	protein_coding	TRUE
chr1	cg24722348	ENSG00000162551	rs4654969	ALPL	19.1421	3.81322	5.16872e-07	0.708638	protein_coding	TRUE
chr1	cg11596404	ENSG00000271853	rs9729773	RP1-178F15.5	-0.855046	0.163002	1.55769e-07	0.7078	processed_transcript	TRUE
chr1	cg27180868	ENSG00000215845	rs7556492	TSTD1	-1.72084	0.295093	5.49246e-09	0.706694	protein_coding	TRUE
chr1	cg01612182	ENSG00000163382	rs3795727	NAXE	6.04903	0.924466	6.01888e-11	0.704388	protein_coding	TRUE
chr1	cg23913482	ENSG00000049239	rs7555568	H6PD	-24.9009	4.41488	1.69823e-08	0.69721	protein_coding	TRUE
chr1	cg21058413	ENSG00000143786	rs12740255	CNIH3	-1.60164	0.302587	1.20236e-07	0.696174	protein_coding	TRUE
chr1	cg00785941	ENSG00000196071	rs61857507	OR2L13	-1.69284	0.285977	3.22959e-09	0.691847	protein_coding	TRUE
chr1	cg07898899	ENSG00000189171	rs999418	S100A13	9.98354	1.93804	2.58619e-07	0.691332	protein_coding	TRUE
chr1	cg06600287	ENSG00000116171	rs36122767	SCP2	-27.4931	3.84929	9.17186e-13	0.686317	protein_coding	TRUE
chr1	cg17457884	ENSG00000204138	rs11247790	PHACTR4	17.4952	3.55086	8.3491e-07	0.681439	protein_coding	TRUE
chr1	cg10233913	ENSG00000117115	rs910223	PADI2	-158.081	29.9772	1.33947e-07	0.679341	protein_coding	TRUE
chr1	cg12084952	ENSG00000179163	rs143150363	FUCA1	1.15601	0.21377	6.38343e-08	0.676934	protein_coding	TRUE
chr1	cg16990280	ENSG00000268575	rs11486028	RP1-283E3.8	-7.72535	1.34475	9.20202e-09	0.674215	processed_transcript	TRUE
chr1	cg12662007	ENSG00000081277	rs199660508	PKP1	-280.546	55.0938	3.54021e-07	0.673655	protein_coding	TRUE
chr1	cg00211609	ENSG00000176022	rs12036216	B3GALT6	3.5323	0.545682	9.59616e-11	0.671026	protein_coding	TRUE
chr1	cg11120551	ENSG00000180867	rs12092016	PDIA3P1	-2.40196	0.473531	3.92717e-07	0.668807	processed_pseudogene	TRUE
chr1	cg06900068	ENSG00000117115	rs910223	PADI2	-218.288	42.1389	2.21647e-07	0.667006	protein_coding	TRUE
chr1	cg22572173	ENSG00000198892	rs67531894	SHISA4	-3.8197	0.550017	3.79291e-12	0.665283	protein_coding	TRUE
chr1	cg09854709	ENSG00000132694	rs822426	ARHGEF11	-6.62586	0.960131	5.16393e-12	0.657896	protein_coding	TRUE
chr1	cg11803389	ENSG00000280670	rs2991966	CCDC163P	-22.2229	2.83141	4.2041e-15	0.656882	protein_coding	TRUE
chr1	cg09103812	ENSG00000204624	rs3124627	DISP3	-8.62039	0.683677	1.88703e-36	0.654253	protein_coding	TRUE
chr1	cg11170025	ENSG00000133069	rs1668871	TMCC2	-16.499	2.68892	8.46623e-10	0.653754	protein_coding	TRUE
chr1	cg17826594	ENSG00000162402	rs41294827	USP24	12.1124	2.40076	4.52936e-07	0.653589	protein_coding	TRUE
chr1	cg04904030	ENSG00000081277	rs12408733	PKP1	-250.637	47.9223	1.69437e-07	0.649971	protein_coding	TRUE
chr1	cg00845930	ENSG00000116288	rs200968609	PARK7	4.64628	0.641902	4.54348e-13	0.648352	protein_coding	TRUE
chr1	cg19316303	ENSG00000231365	rs10923754	RP11-418J17.1	-4.63559	0.748156	5.79076e-10	0.642271	antisense	TRUE
chr1	cg05346593	ENSG00000211454	rs61764914	AKR7L	3.54131	0.636046	2.5813e-08	0.641974	polymorphic_pseudogene	TRUE
chr1	cg21263208	ENSG00000196418	rs149193366	ZNF124	2.5982	0.35645	3.12027e-13	0.641765	protein_coding	TRUE
chr1	cg24565143	ENSG00000130695	rs149847106	CEP85	21.214	4.26443	6.53699e-07	0.640394	protein_coding	TRUE
chr1	cg20433858	ENSG00000196071	rs61857507	OR2L13	-2.1826	0.367419	2.84377e-09	0.639077	protein_coding	TRUE
chr1	cg08587864	ENSG00000135845	rs3213563	PIGC	-1.94226	0.371506	1.71294e-07	0.632178	protein_coding	TRUE
chr1	cg27212386	ENSG00000204084	rs4653336	INPP5B	-20.3898	3.98968	3.21073e-07	0.631019	protein_coding	TRUE
chr1	cg11166453	ENSG00000169224	rs41305741	GCSAML	-0.827201	0.147675	2.12522e-08	0.630171	protein_coding	TRUE
chr1	cg26060667	ENSG00000169224	rs12404733	GCSAML	-1.1464	0.210213	4.93887e-08	0.625391	protein_coding	TRUE
chr1	cg13848905	ENSG00000162782	rs7546703	TDRD5	-2.67263	0.430001	5.11945e-10	0.624313	protein_coding	TRUE
chr1	cg03579872	ENSG00000116171	rs1242331	SCP2	-16.5876	1.77931	1.13668e-20	0.619584	protein_coding	TRUE
chr1	cg06786773	ENSG00000181873	rs10916277	IBA57	-5.59242	0.982048	1.23625e-08	0.615375	protein_coding	TRUE
chr1	cg04923746	ENSG00000223649	rs10863899	RP11-359E8.3	-0.612375	0.0928005	4.14418e-11	0.612338	lincRNA	TRUE
chr1	cg22502492	ENSG00000249087	rs61777147	ZNF436-AS1	8.23845	1.58049	1.86222e-07	0.610527	antisense	TRUE
chr1	cg06874172	ENSG00000132694	rs822426	ARHGEF11	14.6348	2.38276	8.15171e-10	0.610164	protein_coding	TRUE
chr1	cg23072051	ENSG00000142655	rs2506885	PEX14	-28.0206	4.68341	2.19142e-09	0.603933	protein_coding	TRUE
chr1	cg00956142	ENSG00000204138	rs60645402	PHACTR4	-7.58883	1.42498	1.00635e-07	0.603368	protein_coding	TRUE
chr1	cg27409662	ENSG00000189266	rs140748141	PNRC2	-20.9512	2.97751	1.97141e-12	0.602706	protein_coding	TRUE
chr1	cg06398147	ENSG00000169598	rs114272920	DFFB	-11.9206	1.88868	2.76206e-10	0.601109	protein_coding	TRUE
chr1	cg02349066	ENSG00000135828	rs610367	RNASEL	-8.06102	0.941407	1.10224e-17	0.601066	protein_coding	TRUE
chr1	cg12830684	ENSG00000142655	rs2483677	PEX14	-9.67757	1.11962	5.44444e-18	0.599976	protein_coding	TRUE
chr1	cg00569276	ENSG00000117115	rs910223	PADI2	-108.057	16.4713	5.37009e-11	0.597562	protein_coding	TRUE
chr1	cg04289045	ENSG00000116198	rs12736124	CEP104	-24.0466	4.7995	5.43679e-07	0.596576	protein_coding	TRUE
chr1	cg01551238	ENSG00000204624	rs3124627	DISP3	-10.8833	0.845464	6.4216e-38	0.595195	protein_coding	TRUE
chr1	cg26020982	ENSG00000237975	rs4845425	FLG-AS1	3.779	0.614928	7.97481e-10	0.592406	antisense	TRUE
chr1	cg06828260	ENSG00000085491	rs12118280	SLC25A24	-12.8476	2.55001	4.6981e-07	0.588583	protein_coding	TRUE
chr1	cg12527475	ENSG00000081248	rs1325312	CACNA1S	-4.31619	0.796315	5.9532e-08	0.586012	protein_coding	TRUE
chr1	cg21446242	ENSG00000254685	rs67800484	FPGT	-6.08672	1.02484	2.86476e-09	0.585838	protein_coding	TRUE
chr1	cg12481266	ENSG00000174514	rs35117752	MFSD4A	-18.7411	2.97132	2.83913e-10	0.58545	protein_coding	TRUE
chr1	cg04306220	ENSG00000004455	rs71909186	AK2	-7.61323	1.24441	9.47979e-10	0.583619	protein_coding	TRUE
chr1	cg00656881	ENSG00000162585	rs262663	FAAP20	-1.30483	0.246444	1.19256e-07	0.580876	protein_coding	TRUE
chr1	cg12696750	ENSG00000163875	rs4653301	MEAF6	5.5123	0.884829	4.67084e-10	0.576565	protein_coding	TRUE
chr1	cg16413020	ENSG00000213625	rs12145690	LEPROT	8.01989	1.38172	6.46363e-09	0.574383	protein_coding	TRUE
chr1	cg00060374	ENSG00000235098	rs1781134	ANKRD65	-1.9215	0.283766	1.27521e-11	0.572165	protein_coding	TRUE
chr1	cg17094624	ENSG00000203666	rs140218267	EFCAB2	-53.4674	8.25478	9.34727e-11	0.571143	protein_coding	TRUE
chr1	cg07313626	ENSG00000169224	rs55852476	GCSAML	-1.29215	0.262213	8.31379e-07	0.568403	protein_coding	TRUE
chr1	cg09331144	ENSG00000176022	rs77994686	B3GALT6	1.4361	0.198805	5.06155e-13	0.567161	protein_coding	TRUE
chr1	cg27529520	ENSG00000117115	rs1022579	PADI2	-63.2115	7.05682	3.32112e-19	0.566623	protein_coding	TRUE
chr1	cg02803556	ENSG00000117640	rs6698927	MTFR1L	47.5593	9.61652	7.59156e-07	0.566565	protein_coding	TRUE
chr1	cg00597915	ENSG00000117115	rs910223	PADI2	-89.5755	12.1056	1.36687e-13	0.566117	protein_coding	TRUE
chr1	cg14134508	ENSG00000213171	rs2293088	LINGO4	-2.0327	0.36506	2.57511e-08	0.563672	protein_coding	TRUE
chr1	cg05379302	ENSG00000204624	rs3099633	DISP3	-5.80146	0.43748	3.89165e-40	0.563549	protein_coding	TRUE
chr1	cg14976592	ENSG00000213625	rs12145690	LEPROT	4.56316	0.702241	8.1395e-11	0.563282	protein_coding	TRUE
chr1	cg22082456	ENSG00000116171	rs35488175	SCP2	-39.9514	7.20046	2.88216e-08	0.558878	protein_coding	TRUE
chr1	cg06917450	ENSG00000134690	rs5773600	CDCA8	-0.393544	0.0642097	8.84123e-10	0.55642	protein_coding	TRUE
chr1	cg21908664	ENSG00000228106	rs4609435	RP11-452F19.3	-0.851688	0.166433	3.09918e-07	0.555047	lincRNA	TRUE
chr1	cg08130084	ENSG00000196071	rs61857507	OR2L13	3.1689	0.524653	1.54117e-09	0.553714	protein_coding	TRUE
chr1	cg03956908	ENSG00000162688	rs7543433	AGL	-141.13	27.7485	3.65631e-07	0.550396	protein_coding	TRUE
chr1	cg19716264	ENSG00000203666	rs61844237	EFCAB2	-20.5567	1.63962	4.65557e-36	0.550381	protein_coding	TRUE
chr1	cg11887554	ENSG00000142675	rs8768	CNKSR1	-9.85751	1.82319	6.41836e-08	0.549723	protein_coding	TRUE
chr1	cg13294652	ENSG00000181873	rs489926	IBA57	-1.64492	0.250244	4.92186e-11	0.548483	protein_coding	TRUE
chr1	cg16282977	ENSG00000271853	rs28754733	RP1-178F15.5	0.885245	0.158538	2.35322e-08	0.54751	processed_transcript	TRUE
chr1	cg13563504	ENSG00000213171	rs2293088	LINGO4	-2.58931	0.494678	1.65576e-07	0.546913	protein_coding	TRUE
chr1	cg25548811	ENSG00000158769	rs11588189	F11R	4.11278	0.836381	8.77236e-07	0.546029	protein_coding	TRUE
chr1	cg16990082	ENSG00000117480	rs6678149	FAAH	10.368	2.06388	5.07322e-07	0.544416	protein_coding	TRUE
chr1	cg12738981	ENSG00000132676	rs6662953	DAP3	-17.4018	3.01518	7.86259e-09	0.543656	protein_coding	TRUE
chr1	cg00022642	ENSG00000116906	rs476210	GNPAT	-13.963	2.41518	7.41028e-09	0.54325	protein_coding	TRUE
chr1	cg22352176	ENSG00000228106	rs4609435	RP11-452F19.3	-0.816284	0.158947	2.81289e-07	0.542126	lincRNA	TRUE
chr1	cg02025632	ENSG00000135828	rs610367	RNASEL	-17.4767	2.21361	2.89999e-15	0.541934	protein_coding	TRUE
chr1	cg04027328	ENSG00000204624	rs3124627	DISP3	-34.3492	4.42234	8.0235e-15	0.540328	protein_coding	TRUE
chr1	cg21538631	ENSG00000116171	rs57750852	SCP2	-37.4185	7.405	4.34597e-07	0.539015	protein_coding	TRUE
chr1	cg03123370	ENSG00000117450	rs2991966	PRDX1	27.9023	5.48664	3.6666e-07	0.538712	protein_coding	TRUE
chr1	cg04906435	ENSG00000116514	rs171837	RNF19B	-19.8988	3.60995	3.54347e-08	0.53706	protein_coding	TRUE
chr1	cg16097329	ENSG00000130762	rs34109718	ARHGEF16	-10.2626	1.84048	2.46004e-08	0.535256	protein_coding	TRUE
chr1	cg13512890	ENSG00000231365	rs61319010	RP11-418J17.1	-1.7162	0.239274	7.36308e-13	0.533139	antisense	TRUE
chr1	cg03384426	ENSG00000189266	rs75910560	PNRC2	-17.6924	2.81811	3.42707e-10	0.532286	protein_coding	TRUE
chr1	cg08859206	ENSG00000116171	rs1242331	SCP2	-10.8173	1.21214	4.49163e-19	0.531422	protein_coding	TRUE
chr1	cg26856924	ENSG00000092607	rs1886918	TBX15	1.1018	0.211721	1.95017e-07	0.528456	protein_coding	TRUE
chr1	cg01200585	ENSG00000181873	rs10916277	IBA57	1.71254	0.262907	7.32407e-11	0.524648	protein_coding	TRUE
chr1	cg21931713	ENSG00000142655	rs1411402	PEX14	-41.2384	7.6845	8.03088e-08	0.523728	protein_coding	TRUE
chr1	cg24083324	ENSG00000274895	rs340838	RP11-478J18.2	14.1397	1.96546	6.28873e-13	0.523282	antisense	TRUE
chr1	cg24294013	ENSG00000142655	rs2483677	PEX14	-12.711	1.61311	3.2777e-15	0.519463	protein_coding	TRUE
chr1	cg15920552	ENSG00000272145	rs12743517	NFYC-AS1	-2.70829	0.492717	3.87079e-08	0.517207	antisense	TRUE
chr1	cg09072162	ENSG00000162402	rs41294827	USP24	6.35368	1.19622	1.08741e-07	0.515915	protein_coding	TRUE
chr1	cg10855283	ENSG00000158882	rs4656292	TOMM40L	5.30245	0.891026	2.66606e-09	0.514745	protein_coding	TRUE
chr1	cg10886419	ENSG00000196071	rs61857507	OR2L13	3.84637	0.627919	9.03532e-10	0.510357	protein_coding	TRUE
chr1	cg04021497	ENSG00000189266	rs72540327	PNRC2	-15.1562	2.13863	1.37192e-12	0.509019	protein_coding	TRUE
chr1	cg08885800	ENSG00000081248	rs7516023	CACNA1S	-3.08417	0.460005	2.019e-11	0.508648	protein_coding	TRUE
chr1	cg21399703	ENSG00000169224	rs41305741	GCSAML	-0.503881	0.0844604	2.43321e-09	0.50621	protein_coding	TRUE
chr1	cg06840154	ENSG00000117640	rs55654329	MTFR1L	-46.1025	8.25312	2.32261e-08	0.505248	protein_coding	TRUE
chr1	cg06004306	ENSG00000117115	rs910223	PADI2	-78.3972	9.06359	5.16426e-18	0.504824	protein_coding	TRUE
chr1	cg17383186	ENSG00000143552	rs199864074	NUP210L	-2.44837	0.471614	2.08644e-07	0.502517	protein_coding	TRUE
chr1	cg10554624	ENSG00000121310	rs35488175	ECHDC2	-59.5327	11.3112	1.4161e-07	0.500145	protein_coding	TRUE
chr1	cg07133347	ENSG00000198890	rs72442711	PRMT6	-9.83099	1.75892	2.28079e-08	0.499565	protein_coding	TRUE
chr1	cg21895262	ENSG00000137996	rs4908058	RTCA	-7.05423	1.2721	2.93344e-08	0.497177	protein_coding	TRUE
chr1	cg24371534	ENSG00000130762	rs2487681	ARHGEF16	-3.92672	0.563094	3.09203e-12	0.497151	protein_coding	TRUE
chr1	cg16733203	ENSG00000204624	rs3010221	DISP3	-17.7699	2.31562	1.66807e-14	0.496536	protein_coding	TRUE
chr1	cg23902969	ENSG00000188004	rs11587021	C1orf204	-2.00793	0.381583	1.42411e-07	0.496221	protein_coding	TRUE
chr1	cg12744321	ENSG00000116198	rs34966926	CEP104	-19.9213	3.53278	1.71049e-08	0.496096	protein_coding	TRUE
chr1	cg07189167	ENSG00000081277	rs199660508	PKP1	-108.683	17.1284	2.22132e-10	0.495846	protein_coding	TRUE
chr1	cg08510884	ENSG00000143198	rs12040685	MGST3	-16.1505	2.14728	5.42111e-14	0.493504	protein_coding	TRUE
chr1	cg25983401	ENSG00000196071	rs61857507	OR2L13	2.5195	0.39045	1.09794e-10	0.493151	protein_coding	TRUE
chr1	cg04077668	ENSG00000189171	rs9729773	S100A13	8.765	1.34585	7.38439e-11	0.490836	protein_coding	TRUE
chr1	cg26058965	ENSG00000130770	rs61787035	ATPIF1	-37.2504	5.16761	5.65933e-13	0.48897	protein_coding	TRUE
chr1	cg13466383	ENSG00000215845	rs4617422	TSTD1	-1.57877	0.260525	1.36143e-09	0.484672	protein_coding	TRUE
chr1	cg23229016	ENSG00000117682	rs1002488	DHDDS	-5.3516	1.07035	5.73779e-07	0.484654	protein_coding	TRUE
chr1	cg00504075	ENSG00000132676	rs12040894	DAP3	6.89002	1.11317	6.03303e-10	0.484056	protein_coding	TRUE
chr1	cg22943243	ENSG00000117640	rs213641	MTFR1L	37.1168	7.01828	1.23269e-07	0.48346	protein_coding	TRUE
chr1	cg01200585	ENSG00000154358	rs10916277	OBSCN	-3.93549	0.602608	6.54402e-11	0.482647	protein_coding	TRUE
chr1	cg07555102	ENSG00000142655	rs34612970	PEX14	-28.7576	5.51196	1.81551e-07	0.477992	protein_coding	TRUE
chr1	cg14810798	ENSG00000230461	rs340879	PROX1-AS1	-15.9223	2.4214	4.8443e-11	0.476997	processed_transcript	TRUE
chr1	cg08156924	ENSG00000135828	rs610367	RNASEL	-12.0957	1.28934	6.51579e-21	0.475013	protein_coding	TRUE
chr1	cg16140954	ENSG00000169598	rs7540944	DFFB	11.2715	2.03375	2.98663e-08	0.473294	protein_coding	TRUE
chr1	cg09067269	ENSG00000237975	rs61815460	FLG-AS1	4.28761	0.789165	5.53853e-08	0.473115	antisense	TRUE
chr1	cg06786773	ENSG00000154358	rs10916277	OBSCN	12.8516	2.25233	1.15714e-08	0.471056	protein_coding	TRUE
chr1	cg17766148	ENSG00000081248	rs4498834	CACNA1S	-3.55418	0.600957	3.33486e-09	0.467397	protein_coding	TRUE
chr1	cg07092448	ENSG00000203288	rs1521185	RP11-98D18.9	0.531232	0.108255	9.23796e-07	0.465771	antisense	TRUE
chr1	cg15104031	ENSG00000271853	rs56366330	RP1-178F15.5	0.971816	0.17855	5.24428e-08	0.464035	processed_transcript	TRUE
chr1	cg18198730	ENSG00000169224	rs71533502	GCSAML	-0.807909	0.137658	4.38591e-09	0.461846	protein_coding	TRUE
chr1	cg11312524	ENSG00000137996	rs4908058	RTCA	-4.92413	0.855534	8.63225e-09	0.458356	protein_coding	TRUE
chr1	cg16835277	ENSG00000117115	rs1022579	PADI2	-127.829	17.4972	2.75858e-13	0.458	protein_coding	TRUE
chr1	cg14828511	ENSG00000198890	rs12406721	PRMT6	-5.5416	0.81088	8.25508e-12	0.457778	protein_coding	TRUE
chr1	cg04585221	ENSG00000142655	rs1411402	PEX14	-12.3721	1.54465	1.15072e-15	0.45767	protein_coding	TRUE
chr1	cg09995475	ENSG00000143162	rs1005298	CREG1	64.0782	12.2027	1.51143e-07	0.456725	protein_coding	TRUE
chr1	cg00855731	ENSG00000174514	rs35117752	MFSD4A	-12.6095	2.15494	4.87386e-09	0.453561	protein_coding	TRUE
chr1	cg17429686	ENSG00000215912	rs28707614	TTC34	3.46703	0.614457	1.6767e-08	0.452749	protein_coding	TRUE
chr1	cg01834541	ENSG00000142655	rs2483677	PEX14	-9.71456	1.0166	1.2244e-21	0.451794	protein_coding	TRUE
chr1	cg00889473	ENSG00000116198	rs34966926	CEP104	-16.072	2.90101	3.02198e-08	0.451701	protein_coding	TRUE
chr1	cg13685833	ENSG00000116171	rs112988376	SCP2	-9.24841	1.17865	4.27393e-15	0.451336	protein_coding	TRUE
chr1	cg24034746	ENSG00000176022	rs77994686	B3GALT6	1.87325	0.283755	4.06631e-11	0.449346	protein_coding	TRUE
chr1	cg05906443	ENSG00000213171	rs12567867	LINGO4	2.1505	0.436846	8.53233e-07	0.448471	protein_coding	TRUE
chr1	cg04708753	ENSG00000132906	rs4233532	CASP9	2.04884	0.27717	1.44629e-13	0.447612	protein_coding	TRUE
chr1	cg20227766	ENSG00000117748	rs113765816	RPA2	14.8514	2.83669	1.64569e-07	0.446955	protein_coding	TRUE
chr1	cg09506600	ENSG00000203663	rs61857507	OR2L2	-0.234706	0.0472104	6.64383e-07	0.445544	protein_coding	TRUE
chr1	cg15378869	ENSG00000171806	rs115234612	METTL18	-8.50331	1.49352	1.24483e-08	0.437683	protein_coding	TRUE
chr1	cg04036898	ENSG00000117480	rs7552589	FAAH	-10.8556	2.0864	1.96084e-07	0.437275	protein_coding	TRUE
chr1	cg04310824	ENSG00000116171	rs1242331	SCP2	-31.3521	4.82403	8.07752e-11	0.436297	protein_coding	TRUE
chr1	cg01615673	ENSG00000204624	rs34011216	DISP3	-42.5759	8.55602	6.48655e-07	0.434997	protein_coding	TRUE
chr1	cg02813845	ENSG00000116171	rs1242331	SCP2	-8.4304	0.845495	2.04231e-23	0.434766	protein_coding	TRUE
chr1	cg09363892	ENSG00000272512	rs9442612	RP11-54O7.17	-1.94779	0.365146	9.59205e-08	0.434663	lincRNA	TRUE
chr1	cg10607462	ENSG00000122481	rs76032537	RWDD3	10.8679	2.20826	8.58978e-07	0.432302	protein_coding	TRUE
chr1	cg12211490	ENSG00000188672	rs61775180	RHCE	-6.1506	0.941182	6.36194e-11	0.431195	protein_coding	TRUE
chr1	cg26058965	ENSG00000270605	rs61787035	RP5-1092A3.4	-34.2942	4.48293	2.01056e-14	0.430949	antisense	TRUE
chr1	cg03981535	ENSG00000176393	rs10800804	RNPEP	-3.40916	0.664856	2.93345e-07	0.429745	protein_coding	TRUE
chr1	cg04637881	ENSG00000137996	rs60926925	RTCA	-1.48254	0.252521	4.33294e-09	0.428059	protein_coding	TRUE
chr1	cg24795785	ENSG00000162616	rs41311176	DNAJB4	-20.0699	3.42909	4.83211e-09	0.426682	protein_coding	TRUE
chr1	cg01557798	ENSG00000154358	rs6682260	OBSCN	16.0276	3.15917	3.9088e-07	0.424271	protein_coding	TRUE
chr1	cg22273474	ENSG00000235098	rs150789461	ANKRD65	2.42131	0.410902	3.80043e-09	0.422394	protein_coding	TRUE
chr1	cg06970220	ENSG00000160785	rs11264457	SLC25A44	-10.5273	1.56945	1.97762e-11	0.4219	protein_coding	TRUE
chr1	cg01347250	ENSG00000189171	rs35890519	S100A13	6.18042	0.973525	2.1742e-10	0.421567	protein_coding	TRUE
chr1	cg00657094	ENSG00000176022	rs78107697	B3GALT6	5.74859	1.14865	5.59649e-07	0.41856	protein_coding	TRUE
chr1	cg07148744	ENSG00000270605	rs505966	RP5-1092A3.4	-35.7629	4.49932	1.88764e-15	0.418392	antisense	TRUE
chr1	cg18379824	ENSG00000132906	rs4593819	CASP9	3.28885	0.426783	1.2968e-14	0.415254	protein_coding	TRUE
chr1	cg11770675	ENSG00000065243	rs11463292	PKN2	6.85945	1.12051	9.25723e-10	0.414467	protein_coding	TRUE
chr1	cg24545100	ENSG00000213171	rs10888435	LINGO4	-1.51572	0.237064	1.61883e-10	0.414257	protein_coding	TRUE
chr1	cg24545100	ENSG00000182134	rs10888435	TDRKH	-6.74626	1.18905	1.39768e-08	0.412461	protein_coding	TRUE
chr1	cg08861456	ENSG00000196071	rs61857507	OR2L13	-2.99719	0.458342	6.18476e-11	0.412	protein_coding	TRUE
chr1	cg15724945	ENSG00000092607	rs3790553	TBX15	0.566823	0.115396	9.01578e-07	0.411946	protein_coding	TRUE
chr1	cg25767906	ENSG00000116171	rs1242331	SCP2	-10.4479	1.06454	9.75272e-23	0.411875	protein_coding	TRUE
chr1	cg07174997	ENSG00000162753	rs11489771	SLC9C2	-1.77328	0.351197	4.4356e-07	0.408437	protein_coding	TRUE
chr1	cg15554126	ENSG00000142655	rs2483677	PEX14	-20.2484	2.60503	7.67625e-15	0.406065	protein_coding	TRUE
chr1	cg20948151	ENSG00000116885	rs56755250	OSCP1	-3.16592	0.567924	2.4818e-08	0.405919	protein_coding	TRUE
chr1	cg15374471	ENSG00000130770	rs2938867	ATPIF1	-75.1331	12.2832	9.551e-10	0.403817	protein_coding	TRUE
chr1	cg25302646	ENSG00000117586	rs6696012	TNFSF4	-1.37838	0.277133	6.56894e-07	0.403046	protein_coding	TRUE
chr1	cg18267943	ENSG00000143157	rs3830715	POGK	-35.3808	6.91958	3.16831e-07	0.399818	protein_coding	TRUE
chr1	cg23874078	ENSG00000156171	rs3762374	DRAM2	7.91365	0.994668	1.77593e-15	0.398878	protein_coding	TRUE
chr1	cg15888996	ENSG00000160049	rs6662684	DFFA	-1.65054	0.315185	1.63448e-07	0.396171	protein_coding	TRUE
chr1	cg14134508	ENSG00000182134	rs2293088	TDRKH	-9.12478	1.7958	3.75103e-07	0.396079	protein_coding	TRUE
chr1	cg03352427	ENSG00000143552	rs199864074	NUP210L	-1.68818	0.281332	1.965e-09	0.394077	protein_coding	TRUE
chr1	cg11078824	ENSG00000160781	rs933489	PAQR6	-18.5733	2.83844	6.00977e-11	0.393163	protein_coding	TRUE
chr1	cg03146154	ENSG00000230896	rs200134370	RP11-767N6.7	-0.751467	0.143457	1.62089e-07	0.392775	sense_intronic	TRUE
chr1	cg10018845	ENSG00000162688	rs7543433	AGL	101.406	16.4272	6.69692e-10	0.392353	protein_coding	TRUE
chr1	cg19352308	ENSG00000163354	rs4845405	DCST2	18.4883	2.93546	3.01003e-10	0.391905	protein_coding	TRUE
chr1	cg19825186	ENSG00000196352	rs6660557	CD55	-9.55808	1.86718	3.07173e-07	0.391233	protein_coding	TRUE
chr1	cg16270485	ENSG00000162551	rs4654759	ALPL	26.0205	5.20501	5.75886e-07	0.388841	protein_coding	TRUE
chr1	cg09871079	ENSG00000116514	rs9425969	RNF19B	21.8396	4.33651	4.74822e-07	0.388159	protein_coding	TRUE
chr1	cg19400001	ENSG00000237975	rs12032307	FLG-AS1	7.97959	1.59793	5.92302e-07	0.388152	antisense	TRUE
chr1	cg24484971	ENSG00000223649	rs10863899	RP11-359E8.3	-0.701815	0.116716	1.82087e-09	0.38767	lincRNA	TRUE
chr1	cg03609269	ENSG00000116171	rs1242331	SCP2	-11.4194	1.17902	3.47425e-22	0.386256	protein_coding	TRUE
chr1	cg05887270	ENSG00000117640	rs71577800	MTFR1L	26.7464	4.65957	9.46187e-09	0.382385	protein_coding	TRUE
chr1	cg09148021	ENSG00000162616	rs41311176	DNAJB4	-13.7491	2.58766	1.07644e-07	0.381329	protein_coding	TRUE
chr1	cg24411043	ENSG00000215845	rs7556492	TSTD1	-1.63468	0.249607	5.79159e-11	0.37973	protein_coding	TRUE
chr1	cg22157494	ENSG00000116198	rs12755519	CEP104	-17.3177	3.47969	6.46451e-07	0.378574	protein_coding	TRUE
chr1	cg12099459	ENSG00000263956	rs76197525	NBPF11	8.65774	1.47427	4.29124e-09	0.378261	protein_coding	TRUE
chr1	cg08708961	ENSG00000163050	rs6674701	ADCK3	-3.47044	0.663664	1.70235e-07	0.37821	protein_coding	TRUE
chr1	cg05918124	ENSG00000085491	rs61799377	SLC25A24	-8.19948	1.17347	2.80085e-12	0.376735	protein_coding	TRUE
chr1	cg03307360	ENSG00000163050	rs10639039	ADCK3	8.41401	1.53121	3.90685e-08	0.376492	protein_coding	TRUE
chr1	cg04526825	ENSG00000163050	rs2855564	ADCK3	4.35249	0.787047	3.19968e-08	0.375953	protein_coding	TRUE
chr1	cg13906823	ENSG00000215845	rs55745240	TSTD1	-1.40255	0.239704	4.88059e-09	0.374141	protein_coding	TRUE
chr1	cg07174997	ENSG00000117601	rs11489771	SERPINC1	-3.01929	0.567822	1.05309e-07	0.373439	protein_coding	TRUE
chr1	cg10768996	ENSG00000133059	rs1172113	DSTYK	19.3193	3.50653	3.59841e-08	0.373329	protein_coding	TRUE
chr1	cg23987244	ENSG00000142655	rs2483677	PEX14	-11.1434	1.31414	2.26021e-17	0.370312	protein_coding	TRUE
chr1	cg25208724	ENSG00000160785	rs11264457	SLC25A44	-2.16621	0.280545	1.15031e-14	0.369031	protein_coding	TRUE
chr1	cg21598751	ENSG00000272668	rs7527418	RP11-190A12.8	-0.225594	0.0458196	8.49972e-07	0.367901	antisense	TRUE
chr1	cg12339802	ENSG00000134690	rs7526362	CDCA8	-0.265214	0.0428226	5.89071e-10	0.367891	protein_coding	TRUE
chr1	cg17167920	ENSG00000143552	rs199864074	NUP210L	-1.4022	0.231808	1.45795e-09	0.367049	protein_coding	TRUE
chr1	cg24450063	ENSG00000160785	rs11264457	SLC25A44	-2.40017	0.303644	2.68912e-15	0.366601	protein_coding	TRUE
chr1	cg16007395	ENSG00000116514	rs35154516	RNF19B	28.8493	5.83935	7.79268e-07	0.36562	protein_coding	TRUE
chr1	cg01802117	ENSG00000116171	rs1242331	SCP2	-5.87309	0.591554	3.13768e-23	0.363771	protein_coding	TRUE
chr1	cg21615440	ENSG00000227533	rs58062906	SLC2A1-AS1	-6.83903	0.98374	3.59973e-12	0.360304	lincRNA	TRUE
chr1	cg07572770	ENSG00000180867	rs12092016	PDIA3P1	-1.70155	0.346007	8.75837e-07	0.36004	processed_pseudogene	TRUE
chr1	cg20694572	ENSG00000237975	rs1496042	FLG-AS1	5.36692	1.02444	1.61545e-07	0.358696	antisense	TRUE
chr1	cg27535305	ENSG00000116171	rs1242331	SCP2	-12.297	1.20569	2.00037e-24	0.356772	protein_coding	TRUE
chr1	cg22338127	ENSG00000117595	rs7552506	IRF6	-3.23042	0.650105	6.72719e-07	0.356493	protein_coding	TRUE
chr1	cg10314909	ENSG00000215912	rs11486042	TTC34	2.29279	0.464507	7.97535e-07	0.35506	protein_coding	TRUE
chr1	cg09737265	ENSG00000162669	rs17131429	HFM1	-14.9571	2.4068	5.14758e-10	0.353305	protein_coding	TRUE
chr1	cg00255405	ENSG00000162779	rs16854003	AXDND1	1.58256	0.268412	3.72366e-09	0.350461	protein_coding	TRUE
chr1	cg16348003	ENSG00000189171	rs11548102	S100A13	4.98811	0.778871	1.51079e-10	0.348943	protein_coding	TRUE
chr1	cg11596404	ENSG00000189171	rs9729773	S100A13	7.2708	1.20424	1.56346e-09	0.348528	protein_coding	TRUE
chr1	cg25204440	ENSG00000117595	rs1005287	IRF6	-5.47668	0.862584	2.16504e-10	0.347898	protein_coding	TRUE
chr1	cg16348003	ENSG00000271853	rs11548102	RP1-178F15.5	-0.625743	0.111324	1.89963e-08	0.347397	processed_transcript	TRUE
chr1	cg06961289	ENSG00000198400	rs61813557	NTRK1	1.65142	0.309219	9.2624e-08	0.34661	protein_coding	TRUE
chr1	cg20630926	ENSG00000117461	rs9429095	PIK3R3	-38.7256	5.47903	1.57228e-12	0.346205	protein_coding	TRUE
chr1	cg11343894	ENSG00000189171	rs36115422	S100A13	8.81446	1.76225	5.67882e-07	0.34307	protein_coding	TRUE
chr1	cg10799510	ENSG00000081277	rs11801270	PKP1	-142.884	27.8454	2.87698e-07	0.342498	protein_coding	TRUE
chr1	cg06784218	ENSG00000197429	rs12022673	IPP	-7.54446	1.49725	4.68238e-07	0.339847	protein_coding	TRUE
chr1	cg15025200	ENSG00000237975	rs140771909	FLG-AS1	-4.57189	0.733544	4.58729e-10	0.338004	antisense	TRUE
chr1	cg05139571	ENSG00000143552	rs199864074	NUP210L	-1.15382	0.179218	1.20984e-10	0.337109	protein_coding	TRUE
chr1	cg05454781	ENSG00000142655	rs2483677	PEX14	-22.2546	2.81253	2.51925e-15	0.33574	protein_coding	TRUE
chr1	cg00658007	ENSG00000223649	rs1122745	RP11-359E8.3	-0.421515	0.0673023	3.77594e-10	0.335527	lincRNA	TRUE
chr1	cg09082263	ENSG00000266472	rs834239	MRPS21	8.47312	1.2131	2.85535e-12	0.334982	protein_coding	TRUE
chr1	cg14263176	ENSG00000198892	rs35349183	SHISA4	-6.03664	1.09806	3.85048e-08	0.330702	protein_coding	TRUE
chr1	cg13328788	ENSG00000143552	rs199864074	NUP210L	-0.997715	0.16191	7.17629e-10	0.330184	protein_coding	TRUE
chr1	cg14423246	ENSG00000117595	rs68084857	IRF6	5.8907	0.983985	2.14307e-09	0.329242	protein_coding	TRUE
chr1	cg07148744	ENSG00000130770	rs505966	ATPIF1	-37.3444	5.09311	2.26182e-13	0.328801	protein_coding	TRUE
chr1	cg22077361	ENSG00000179163	rs143150363	FUCA1	1.31584	0.248321	1.16473e-07	0.327975	protein_coding	TRUE
chr1	cg00489772	ENSG00000116198	rs12131756	CEP104	-14.1086	2.49377	1.53549e-08	0.326709	protein_coding	TRUE
chr1	cg01522456	ENSG00000134198	rs10458452	TSPAN2	3.14987	0.538164	4.82792e-09	0.320236	protein_coding	TRUE
chr1	cg26548293	ENSG00000271853	rs1046381	RP1-178F15.5	0.546629	0.093527	5.07745e-09	0.315665	processed_transcript	TRUE
chr1	cg13498757	ENSG00000237975	rs4845427	FLG-AS1	-1.92443	0.289857	3.15326e-11	0.315602	antisense	TRUE
chr1	cg14063843	ENSG00000162688	rs71660907	AGL	-86.0429	14.5898	3.69076e-09	0.311715	protein_coding	TRUE
chr1	cg22906400	ENSG00000204624	rs3124627	DISP3	-10.0457	0.809022	2.11015e-35	0.310815	protein_coding	TRUE
chr1	cg22078638	ENSG00000196352	rs2782845	CD55	-7.81411	1.59074	9.00377e-07	0.307064	protein_coding	TRUE
chr1	cg05397857	ENSG00000176022	rs111452679	B3GALT6	-3.43306	0.65835	1.84172e-07	0.304935	protein_coding	TRUE
chr1	cg27170260	ENSG00000134690	rs7526362	CDCA8	-0.458351	0.0772303	2.94103e-09	0.304799	protein_coding	TRUE
chr1	cg19025525	ENSG00000154358	rs10916277	OBSCN	4.46051	0.87274	3.20575e-07	0.303682	protein_coding	TRUE
chr1	cg03185752	ENSG00000272512	rs9442612	RP11-54O7.17	-1.86847	0.355618	1.48715e-07	0.303454	lincRNA	TRUE
chr1	cg04232698	ENSG00000235098	rs70949584	ANKRD65	1.70467	0.340536	5.56129e-07	0.303412	protein_coding	TRUE
chr1	cg09319435	ENSG00000142655	rs2026792	PEX14	-21.7064	2.5999	6.88845e-17	0.302925	protein_coding	TRUE
chr1	cg04181682	ENSG00000117461	rs1707302	PIK3R3	-15.9163	1.34558	2.77915e-32	0.301442	protein_coding	TRUE
chr1	cg05232215	ENSG00000116171	rs112988376	SCP2	-9.33488	0.982206	2.02002e-21	0.29675	protein_coding	TRUE
chr1	cg21562355	ENSG00000066136	rs12027614	NFYC	10.8834	2.1809	6.02852e-07	0.295674	protein_coding	TRUE
chr1	cg07568418	ENSG00000179163	rs2070954	FUCA1	0.854033	0.163415	1.73078e-07	0.293344	protein_coding	TRUE
chr1	cg00328217	ENSG00000198892	rs2360545	SHISA4	-4.0319	0.735458	4.20164e-08	0.292637	protein_coding	TRUE
chr1	ch.1.173201084F	ENSG00000117601	rs200581010	SERPINC1	2.10922	0.316689	2.73372e-11	0.291077	protein_coding	TRUE
chr1	cg20055417	ENSG00000116171	rs1242331	SCP2	-7.21994	0.71593	6.45641e-24	0.287825	protein_coding	TRUE
chr1	cg01849514	ENSG00000085491	rs72693452	SLC25A24	-6.07196	1.06082	1.04134e-08	0.287101	protein_coding	TRUE
chr1	cg19352308	ENSG00000143537	rs4845405	ADAM15	-7.9472	1.4863	8.94354e-08	0.285825	protein_coding	TRUE
chr1	cg02063079	ENSG00000143157	rs7554414	POGK	-48.3537	9.84208	8.97134e-07	0.28456	protein_coding	TRUE
chr1	cg23364470	ENSG00000162620	rs10890113	LRRIQ3	-5.95423	1.06289	2.11966e-08	0.28145	protein_coding	TRUE
chr1	cg10554624	ENSG00000116171	rs35488175	SCP2	-41.3853	6.00296	5.41869e-12	0.281129	protein_coding	TRUE
chr1	cg07925738	ENSG00000186301	rs7537985	MST1P2	-1.06384	0.208402	3.3118e-07	0.280994	unprocessed_pseudogene	TRUE
chr1	cg12220753	ENSG00000116171	rs112988376	SCP2	-9.56812	0.969248	5.52245e-23	0.280375	protein_coding	TRUE
chr1	cg27584146	ENSG00000117461	rs1416706	PIK3R3	-20.1019	2.06814	2.48303e-22	0.279702	protein_coding	TRUE
chr1	cg09628195	ENSG00000231365	rs144102861	RP11-418J17.1	2.26007	0.394954	1.05044e-08	0.278009	antisense	TRUE
chr1	cg16341373	ENSG00000116922	rs568817	C1orf109	1.88432	0.346991	5.62078e-08	0.277489	protein_coding	TRUE
chr1	cg06753273	ENSG00000223649	rs1122745	RP11-359E8.3	-0.391491	0.0636758	7.83692e-10	0.275138	lincRNA	TRUE
chr1	cg08566367	ENSG00000213171	rs939594	LINGO4	-1.94744	0.309616	3.17769e-10	0.274659	protein_coding	TRUE
chr1	cg11983977	ENSG00000180867	rs12092016	PDIA3P1	-1.36364	0.250544	5.24714e-08	0.273657	processed_pseudogene	TRUE
chr1	cg26148377	ENSG00000271853	rs1046381	RP1-178F15.5	0.492509	0.0853026	7.75628e-09	0.272255	processed_transcript	TRUE
chr1	cg00006626	ENSG00000143552	rs199864074	NUP210L	-1.33302	0.214151	4.82623e-10	0.272233	protein_coding	TRUE
chr1	cg03123370	ENSG00000280670	rs2991966	CCDC163P	14.5126	1.56936	2.29925e-20	0.270386	protein_coding	TRUE
chr1	cg24083324	ENSG00000230461	rs340838	PROX1-AS1	16.9301	3.02096	2.09193e-08	0.269408	processed_transcript	TRUE
chr1	cg06212760	ENSG00000117461	rs7521617	PIK3R3	27.0232	4.84245	2.39847e-08	0.269032	protein_coding	TRUE
chr1	cg16282977	ENSG00000189171	rs28754733	S100A13	-6.88656	1.11124	5.74749e-10	0.268506	protein_coding	TRUE
chr1	cg06974930	ENSG00000117461	rs9429095	PIK3R3	-41.6402	5.30987	4.43296e-15	0.267885	protein_coding	TRUE
chr1	cg14806693	ENSG00000116514	rs171837	RNF19B	-8.62852	0.997575	5.17242e-18	0.267092	protein_coding	TRUE
chr1	cg09992259	ENSG00000132906	rs111689880	CASP9	-2.90825	0.550559	1.27534e-07	0.265755	protein_coding	TRUE
chr1	cg24543286	ENSG00000116171	rs112988376	SCP2	-10.2753	1.0366	3.67164e-23	0.263252	protein_coding	TRUE
chr1	cg17479943	ENSG00000092607	rs3790553	TBX15	0.519382	0.102281	3.81436e-07	0.262891	protein_coding	TRUE
chr1	cg13386331	ENSG00000188672	rs34596921	RHCE	-2.23685	0.305812	2.58422e-13	0.262869	protein_coding	TRUE
chr1	cg16274678	ENSG00000143552	rs199864074	NUP210L	-2.16686	0.403118	7.64741e-08	0.26274	protein_coding	TRUE
chr1	cg07174997	ENSG00000183831	rs11489771	ANKRD45	4.09362	0.779158	1.48915e-07	0.261443	protein_coding	TRUE
chr1	cg09004167	ENSG00000186715	rs1977269	MST1L	1.00995	0.195562	2.41273e-07	0.259633	transcribed_unprocessed_pseudogene	TRUE
chr1	cg21504176	ENSG00000163354	rs4845704	DCST2	27.5621	4.96618	2.85752e-08	0.258164	protein_coding	TRUE
chr1	cg13294652	ENSG00000162913	rs489926	C1orf145	-0.83386	0.13274	3.34472e-10	0.257395	protein_coding	TRUE
chr1	cg11578532	ENSG00000215845	rs12042437	TSTD1	-1.12455	0.160119	2.168e-12	0.255113	protein_coding	TRUE
chr1	cg10110780	ENSG00000130770	rs548177	ATPIF1	-4.35291	0.311711	2.5657e-44	0.253433	protein_coding	TRUE
chr1	cg17094624	ENSG00000272195	rs140218267	RP11-156E8.1	2.38643	0.424681	1.91687e-08	0.252937	antisense	TRUE
chr1	cg15580309	ENSG00000117481	rs147712895	NSUN4	7.40594	1.04438	1.32921e-12	0.250696	protein_coding	TRUE
chr1	cg16356856	ENSG00000162620	rs571848	LRRIQ3	-3.46337	0.641535	6.71745e-08	0.25032	protein_coding	TRUE
chr1	cg20247486	ENSG00000092607	rs201324037	TBX15	0.884641	0.180336	9.3187e-07	0.248167	protein_coding	TRUE
chr1	cg07916101	ENSG00000142675	rs6700024	CNKSR1	5.92463	1.18834	6.17592e-07	0.246359	protein_coding	TRUE
chr1	cg07357157	ENSG00000142655	rs2483677	PEX14	-24.6484	3.0967	1.72652e-15	0.246068	protein_coding	TRUE
chr1	cg01063935	ENSG00000142655	rs2483677	PEX14	-14.1998	1.79662	2.70929e-15	0.240358	protein_coding	TRUE
chr1	cg18147168	ENSG00000215845	rs7556492	TSTD1	-1.74419	0.268666	8.46953e-11	0.240307	protein_coding	TRUE
chr1	cg10110780	ENSG00000270605	rs548177	RP5-1092A3.4	-4.03172	0.217718	1.47634e-76	0.240074	antisense	TRUE
chr1	cg03373115	ENSG00000142856	rs855315	ITGB3BP	-2.188	0.360895	1.33844e-09	0.237686	protein_coding	TRUE
chr1	cg06212760	ENSG00000117480	rs7521617	FAAH	-5.54581	0.930762	2.54794e-09	0.23524	protein_coding	TRUE
chr1	cg08130307	ENSG00000266472	rs1776270	MRPS21	-8.52738	1.22102	2.87274e-12	0.234836	protein_coding	TRUE
chr1	cg24161057	ENSG00000215845	rs4617422	TSTD1	-1.13204	0.175309	1.06541e-10	0.234363	protein_coding	TRUE
chr1	cg00600454	ENSG00000162434	rs74860172	JAK1	-17.7296	3.50501	4.22865e-07	0.233824	protein_coding	TRUE
chr1	cg00695362	ENSG00000131238	rs3131684	PPT1	-28.0265	4.38122	1.58499e-10	0.232089	protein_coding	TRUE
chr1	cg27483432	ENSG00000196071	rs61857507	OR2L13	2.55677	0.434931	4.13811e-09	0.231946	protein_coding	TRUE
chr1	cg27398908	ENSG00000223649	rs7527603	RP11-359E8.3	-0.94311	0.190738	7.63265e-07	0.231309	lincRNA	TRUE
chr1	cg10953003	ENSG00000179163	rs2503003	FUCA1	1.53472	0.282478	5.53978e-08	0.231041	protein_coding	TRUE
chr1	cg04993605	ENSG00000130770	rs546569	ATPIF1	-5.13724	0.37802	4.60042e-42	0.228768	protein_coding	TRUE
chr1	cg27182133	ENSG00000142655	rs2150038	PEX14	-27.0781	4.43655	1.03818e-09	0.228242	protein_coding	TRUE
chr1	cg21280320	ENSG00000237975	rs140771909	FLG-AS1	-2.3811	0.345154	5.24896e-12	0.22244	antisense	TRUE
chr1	cg14669130	ENSG00000117226	rs34074694	GBP3	7.07942	1.43784	8.49419e-07	0.222162	protein_coding	TRUE
chr1	cg00917251	ENSG00000117602	rs195707	RCAN3	-29.3556	2.83613	4.15908e-25	0.222156	protein_coding	TRUE
chr1	cg04607379	ENSG00000142655	rs2026792	PEX14	-15.2562	1.84561	1.38303e-16	0.221836	protein_coding	TRUE
chr1	cg12345380	ENSG00000176022	rs77994686	B3GALT6	2.16662	0.391657	3.16711e-08	0.220812	protein_coding	TRUE
chr1	cg10589385	ENSG00000163131	rs138981555	CTSS	3.65037	0.70404	2.16143e-07	0.220625	protein_coding	TRUE
chr1	cg17180237	ENSG00000092607	rs3790553	TBX15	0.556083	0.111136	5.62676e-07	0.219374	protein_coding	TRUE
chr1	cg15104031	ENSG00000189171	rs56366330	S100A13	-7.66317	1.25984	1.18215e-09	0.218696	protein_coding	TRUE
chr1	cg12919773	ENSG00000116514	rs67835920	RNF19B	-19.7381	3.56874	3.18701e-08	0.217133	protein_coding	TRUE
chr1	cg08477332	ENSG00000271853	rs9726753	RP1-178F15.5	-0.183785	0.0293865	3.99925e-10	0.216547	processed_transcript	TRUE
chr1	cg23902969	ENSG00000272668	rs11587021	RP11-190A12.8	-3.80832	0.442346	7.34633e-18	0.215446	antisense	TRUE
chr1	cg06642677	ENSG00000182004	rs11240607	SNRPE	2.53731	0.390391	8.06337e-11	0.21438	protein_coding	TRUE
chr1	cg12426196	ENSG00000215845	rs6695707	TSTD1	-1.36062	0.222164	9.10176e-10	0.213939	protein_coding	TRUE
chr1	cg14777056	ENSG00000116299	rs185066128	KIAA1324	2.82997	0.537155	1.37586e-07	0.210534	protein_coding	TRUE
chr1	cg15390314	ENSG00000227953	rs7519873	LINC01341	-1.79608	0.245269	2.42695e-13	0.208328	processed_transcript	TRUE
chr1	cg19434000	ENSG00000204624	rs1806619	DISP3	35.3212	3.68576	9.4131e-22	0.208173	protein_coding	TRUE
chr1	cg17933807	ENSG00000163875	rs11264075	MEAF6	2.98829	0.606367	8.2995e-07	0.207744	protein_coding	TRUE
chr1	cg25136326	ENSG00000198890	rs61798463	PRMT6	-5.5772	0.78863	1.52708e-12	0.20581	protein_coding	TRUE
chr1	cg26548293	ENSG00000189171	rs1046381	S100A13	-4.50309	0.660757	9.42285e-12	0.205182	protein_coding	TRUE
chr1	cg26787521	ENSG00000116514	rs6702519	RNF19B	20.2666	3.67571	3.51484e-08	0.204155	protein_coding	TRUE
chr1	cg05918124	ENSG00000260879	rs61799377	RP11-483I13.5	-0.809126	0.144091	1.96141e-08	0.203875	antisense	TRUE
chr1	cg15590113	ENSG00000117115	rs35989645	PADI2	-159.058	22.4508	1.39328e-12	0.203528	protein_coding	TRUE
chr1	cg06612871	ENSG00000116157	rs946155	GPX7	0.489052	0.0978183	5.74508e-07	0.203099	protein_coding	TRUE
chr1	cg05052969	ENSG00000274895	rs72227463	RP11-478J18.2	-11.4897	2.07977	3.3045e-08	0.202318	antisense	TRUE
chr1	cg23107878	ENSG00000237975	rs140771909	FLG-AS1	-3.72065	0.556664	2.3277e-11	0.201625	antisense	TRUE
chr1	cg25013852	ENSG00000142856	rs7416581	ITGB3BP	-2.51905	0.432849	5.8956e-09	0.201334	protein_coding	TRUE
chr1	cg03732007	ENSG00000162585	rs262663	FAAP20	2.16357	0.393932	3.96853e-08	0.199815	protein_coding	TRUE
chr1	cg02279987	ENSG00000176022	rs75972122	B3GALT6	3.081	0.549332	2.03934e-08	0.19809	protein_coding	TRUE
chr1	ch.1.173201084F	ENSG00000183831	rs200581010	ANKRD45	-2.48269	0.411292	1.57682e-09	0.193733	protein_coding	TRUE
chr1	cg10512769	ENSG00000198570	rs12733443	RD3	-16.934	3.04059	2.55724e-08	0.192574	protein_coding	TRUE
chr1	cg13685833	ENSG00000121310	rs112988376	ECHDC2	-12.0743	2.22189	5.50203e-08	0.192554	protein_coding	TRUE
chr1	cg20677516	ENSG00000184774	rs2275896	MGAT4EP	-4.03115	0.733459	3.88306e-08	0.192274	transcribed_unitary_pseudogene	TRUE
chr1	cg05909164	ENSG00000116171	rs112988376	SCP2	-8.78009	0.867759	4.59125e-24	0.192054	protein_coding	TRUE
chr1	cg03579872	ENSG00000121310	rs1242331	ECHDC2	-21.5825	3.73214	7.34404e-09	0.190203	protein_coding	TRUE
chr1	cg05450708	ENSG00000117461	rs35378730	PIK3R3	32.1185	4.28056	6.22136e-14	0.189922	protein_coding	TRUE
chr1	cg00329300	ENSG00000215845	rs55745240	TSTD1	-1.29564	0.198373	6.51951e-11	0.189259	protein_coding	TRUE
chr1	cg08859206	ENSG00000121310	rs1242331	ECHDC2	-14.0747	2.47623	1.31639e-08	0.188436	protein_coding	TRUE
chr1	cg24792360	ENSG00000179163	rs2503003	FUCA1	1.54858	0.284602	5.29183e-08	0.184431	protein_coding	TRUE
chr1	cg25066665	ENSG00000266472	rs145402324	MRPS21	-6.17202	1.18913	2.09854e-07	0.184387	protein_coding	TRUE
chr1	cg05045517	ENSG00000130770	rs505966	ATPIF1	-23.5229	2.6489	6.67127e-19	0.182812	protein_coding	TRUE
chr1	cg03146154	ENSG00000117461	rs200134370	PIK3R3	46.6751	5.60406	8.16682e-17	0.182675	protein_coding	TRUE
chr1	cg00797651	ENSG00000196352	rs12134133	CD55	-3.70639	0.486516	2.57185e-14	0.181486	protein_coding	TRUE
chr1	cg19757176	ENSG00000143552	rs199864074	NUP210L	-2.0879	0.344532	1.36047e-09	0.180781	protein_coding	TRUE
chr1	cg26947569	ENSG00000204624	rs2379159	DISP3	-27.0873	3.7882	8.65041e-13	0.178948	protein_coding	TRUE
chr1	cg06764239	ENSG00000092607	rs3790553	TBX15	0.482622	0.0897655	7.59572e-08	0.178619	protein_coding	TRUE
chr1	cg26066583	ENSG00000081277	rs199660508	PKP1	-145.905	25.6531	1.28833e-08	0.178226	protein_coding	TRUE
chr1	cg19841283	ENSG00000135828	rs610367	RNASEL	-5.57085	0.534002	1.76635e-25	0.177759	protein_coding	TRUE
chr1	cg07913096	ENSG00000130770	rs7518571	ATPIF1	-27.3321	3.52784	9.36763e-15	0.177324	protein_coding	TRUE
chr1	cg02934600	ENSG00000198890	rs61798463	PRMT6	-4.11862	0.501917	2.29105e-16	0.177178	protein_coding	TRUE
chr1	cg27153316	ENSG00000143162	rs1005298	CREG1	-57.1421	11.5773	7.98676e-07	0.176082	protein_coding	TRUE
chr1	cg01933228	ENSG00000162688	rs7543433	AGL	-38.5558	4.73043	3.62155e-16	0.175933	protein_coding	TRUE
chr1	cg24506221	ENSG00000134184	rs148490733	GSTM1	-5.02643	0.763493	4.59621e-11	0.175782	protein_coding	TRUE
chr1	cg26266099	ENSG00000116514	rs194670	RNF19B	-9.9586	1.19996	1.04897e-16	0.170292	protein_coding	TRUE
chr1	cg06784218	ENSG00000117461	rs12022673	PIK3R3	57.6385	10.2943	2.15502e-08	0.16921	protein_coding	TRUE
chr1	ch.1.173201084F	ENSG00000152061	rs61828157	RABGAP1L	10.725	1.76817	1.31471e-09	0.168711	protein_coding	TRUE
chr1	cg21263208	ENSG00000188295	rs149193366	ZNF669	-2.3524	0.428593	4.05014e-08	0.168139	protein_coding	TRUE
chr1	cg09367891	ENSG00000198890	rs72442711	PRMT6	-15.7453	2.7015	5.59704e-09	0.165301	protein_coding	TRUE
chr1	cg11633926	ENSG00000270171	rs2995035	RP11-338N10.1	-21.3909	4.28433	5.95016e-07	0.161874	lincRNA	TRUE
chr1	cg21577315	ENSG00000270605	rs1315398	RP5-1092A3.4	-64.9798	9.75642	2.73429e-11	0.158943	antisense	TRUE
chr1	cg03609269	ENSG00000121310	rs1242331	ECHDC2	-14.8581	2.5327	4.45122e-09	0.157224	protein_coding	TRUE
chr1	cg04414720	ENSG00000163131	rs7529194	CTSS	2.56506	0.39969	1.38417e-10	0.156934	protein_coding	TRUE
chr1	cg22166728	ENSG00000116497	rs9425965	S100PBP	-5.21466	1.03447	4.63387e-07	0.155665	protein_coding	TRUE
chr1	cg09200014	ENSG00000116791	rs6662846	CRYZ	6.81993	1.30268	1.64715e-07	0.154379	protein_coding	TRUE
chr1	cg02951974	ENSG00000227953	rs6426328	LINC01341	2.57486	0.502545	2.99699e-07	0.154262	processed_transcript	TRUE
chr1	cg08243619	ENSG00000204624	rs3010219	DISP3	-26.953	4.14818	8.16377e-11	0.153161	protein_coding	TRUE
chr1	cg10782019	ENSG00000130770	rs10915186	ATPIF1	-7.37441	1.47288	5.53415e-07	0.152705	protein_coding	TRUE
chr1	cg26314055	ENSG00000176022	rs12089192	B3GALT6	1.07302	0.190069	1.64786e-08	0.15176	protein_coding	TRUE
chr1	cg23387929	ENSG00000181754	rs12135954	AMIGO1	-21.9996	4.02897	4.75213e-08	0.15174	protein_coding	TRUE
chr1	cg26011752	ENSG00000117461	rs1707302	PIK3R3	-37.333	4.01587	1.45339e-20	0.15162	protein_coding	TRUE
chr1	cg05045517	ENSG00000270605	rs505966	RP5-1092A3.4	-22.5267	2.24238	9.57844e-24	0.150756	antisense	TRUE
chr1	cg18546249	ENSG00000235098	rs9730511	ANKRD65	-1.52	0.309262	8.8812e-07	0.150065	protein_coding	TRUE
chr1	cg09004167	ENSG00000238142	rs1977269	RP11-108M9.4	0.633543	0.128902	8.88111e-07	0.149816	lincRNA	TRUE
chr1	cg04414720	ENSG00000143457	rs7529194	GOLPH3L	-2.12613	0.355926	2.32172e-09	0.149402	protein_coding	TRUE
chr1	cg08566367	ENSG00000182134	rs939594	TDRKH	-8.01079	1.47208	5.27418e-08	0.149357	protein_coding	TRUE
chr1	cg26320663	ENSG00000237975	rs140771909	FLG-AS1	-3.01897	0.430091	2.22861e-12	0.144822	antisense	TRUE
chr1	cg02813845	ENSG00000121310	rs1242331	ECHDC2	-10.969	1.85031	3.06313e-09	0.144439	protein_coding	TRUE
chr1	cg03522107	ENSG00000037637	rs3738631	FBXO42	30.4889	5.55467	4.04496e-08	0.143131	protein_coding	TRUE
chr1	ch.1.173201084F	ENSG00000162753	rs200581010	SLC9C2	1.20243	0.200364	1.95803e-09	0.142837	protein_coding	TRUE
chr1	cg21388327	ENSG00000218510	rs11586488	LINC00339	-2.99293	0.593526	4.5918e-07	0.142627	lincRNA	TRUE
chr1	cg02494290	ENSG00000198892	rs12722743	SHISA4	3.57976	0.57839	6.04766e-10	0.141726	protein_coding	TRUE
chr1	cg09936581	ENSG00000223745	rs12066315	CCDC18-AS1	-111.566	16.5258	1.46805e-11	0.139561	processed_transcript	TRUE
chr1	cg17719053	ENSG00000116791	rs6662846	CRYZ	8.82334	1.58591	2.64305e-08	0.139445	protein_coding	TRUE
chr1	cg05128437	ENSG00000272195	rs632383	RP11-156E8.1	-2.22593	0.372622	2.31921e-09	0.139302	antisense	TRUE
chr1	cg06786773	ENSG00000162913	rs10916277	C1orf145	-2.55104	0.49773	2.97002e-07	0.138799	protein_coding	TRUE
chr1	cg13488944	ENSG00000116514	rs10914655	RNF19B	17.3926	3.4482	4.55999e-07	0.137467	protein_coding	TRUE
chr1	cg24846680	ENSG00000162913	rs10916277	C1orf145	1.96369	0.367099	8.83456e-08	0.136311	protein_coding	TRUE
chr1	cg27535305	ENSG00000121310	rs1242331	ECHDC2	-16	2.67778	2.29969e-09	0.136229	protein_coding	TRUE
chr1	cg23034840	ENSG00000069275	rs56152218	NUCKS1	-34.8225	7.03609	7.45489e-07	0.134362	protein_coding	TRUE
chr1	cg24693760	ENSG00000143162	rs16859159	CREG1	-15.2426	1.37614	1.63422e-28	0.134329	protein_coding	TRUE
chr1	cg07661407	ENSG00000142856	rs3838451	ITGB3BP	-2.65246	0.457284	6.61353e-09	0.133817	protein_coding	TRUE
chr1	cg15468180	ENSG00000198890	rs72442711	PRMT6	-3.22823	0.34727	1.45802e-20	0.1333	protein_coding	TRUE
chr1	cg11847808	ENSG00000070886	rs209741	EPHA8	-17.3389	3.40838	3.63543e-07	0.132008	protein_coding	TRUE
chr1	cg25767906	ENSG00000121310	rs1242331	ECHDC2	-13.594	2.3061	3.75163e-09	0.130551	protein_coding	TRUE
chr1	cg05397857	ENSG00000242485	rs12410087	MRPL20	4.58878	0.930024	8.05441e-07	0.130106	protein_coding	TRUE
chr1	cg22943875	ENSG00000162551	rs1256344	ALPL	-26.5123	3.09593	1.09374e-17	0.129937	protein_coding	TRUE
chr1	cg05616021	ENSG00000135828	rs610367	RNASEL	-9.69881	1.12511	6.67563e-18	0.128285	protein_coding	TRUE
chr1	cg09629866	ENSG00000094963	rs10912529	FMO2	-1.50368	0.305415	8.50586e-07	0.127702	protein_coding	TRUE
chr1	cg10185505	ENSG00000266472	rs145402324	MRPS21	-3.8809	0.772095	4.99613e-07	0.127085	protein_coding	TRUE
chr1	cg26570165	ENSG00000092607	rs201588069	TBX15	0.379144	0.0589768	1.28712e-10	0.127077	protein_coding	TRUE
chr1	cg26738728	ENSG00000266472	rs145402324	MRPS21	-6.28894	1.27241	7.71149e-07	0.126018	protein_coding	TRUE
chr1	cg05155746	ENSG00000204624	rs3124627	DISP3	-41.2068	4.59125	2.83162e-19	0.125744	protein_coding	TRUE
chr1	cg01802117	ENSG00000121310	rs1242331	ECHDC2	-7.6416	1.29099	3.23589e-09	0.125695	protein_coding	TRUE
chr1	cg15718594	ENSG00000198468	rs34930975	FLVCR1-AS1	-11.1494	2.22827	5.62641e-07	0.124453	lincRNA	TRUE
chr1	cg12060472	ENSG00000116171	rs56222568	SCP2	-39.5721	7.16571	3.34343e-08	0.123602	protein_coding	TRUE
chr1	cg05531421	ENSG00000116675	rs10789179	DNAJC6	19.8523	3.19629	5.26401e-10	0.122897	protein_coding	TRUE
chr1	cg05232215	ENSG00000121310	rs112988376	ECHDC2	-12.1872	2.06435	3.55481e-09	0.122737	protein_coding	TRUE
chr1	cg04993605	ENSG00000270605	rs546569	RP5-1092A3.4	-4.71259	0.271453	1.63994e-67	0.122703	antisense	TRUE
chr1	cg21919968	ENSG00000263956	rs1582087	NBPF11	14.9072	2.3723	3.30324e-10	0.122631	protein_coding	TRUE
chr1	cg02754945	ENSG00000237975	rs140771909	FLG-AS1	-3.15626	0.453028	3.237e-12	0.12249	antisense	TRUE
chr1	cg14806693	ENSG00000116497	rs171837	S100PBP	-3.16849	0.63515	6.08293e-07	0.119248	protein_coding	TRUE
chr1	cg14122995	ENSG00000117461	rs1707302	PIK3R3	-57.4563	11.1428	2.51774e-07	0.114592	protein_coding	TRUE
chr1	cg09004167	ENSG00000219481	rs6586501	NBPF1	-6.62242	1.29953	3.46852e-07	0.112889	protein_coding	TRUE
chr1	cg12101479	ENSG00000227533	rs58062906	SLC2A1-AS1	-8.73757	1.07881	5.5288e-16	0.111992	lincRNA	TRUE
chr1	cg12898220	ENSG00000069275	rs1772143	NUCKS1	-7.7769	1.52299	3.28465e-07	0.111436	protein_coding	TRUE
chr1	cg18140268	ENSG00000263956	rs488014	NBPF11	6.75048	1.36587	7.72285e-07	0.110856	protein_coding	TRUE
chr1	cg07167872	ENSG00000069275	rs823074	NUCKS1	-10.5646	2.05565	2.75768e-07	0.109555	protein_coding	TRUE
chr1	cg24506221	ENSG00000134202	rs36209093	GSTM3	-5.59547	1.00389	2.49288e-08	0.109457	protein_coding	TRUE
chr1	cg24088508	ENSG00000134690	rs7526362	CDCA8	-0.232151	0.0375925	6.59721e-10	0.109246	protein_coding	TRUE
chr1	cg21577315	ENSG00000130770	rs1315398	ATPIF1	-67.154	10.8305	5.62959e-10	0.10919	protein_coding	TRUE
chr1	cg09232478	ENSG00000092607	rs200100774	TBX15	0.428205	0.0684923	4.05559e-10	0.107877	protein_coding	TRUE
chr1	cg05128437	ENSG00000203666	rs632383	EFCAB2	38.8626	5.59142	3.6423e-12	0.107413	protein_coding	TRUE
chr1	cg04990556	ENSG00000130695	rs6700455	CEP85	6.4225	1.12113	1.01254e-08	0.107389	protein_coding	TRUE
chr1	cg03242265	ENSG00000263956	rs526708	NBPF11	6.92627	1.38664	5.8831e-07	0.107284	protein_coding	TRUE
chr1	cg06992877	ENSG00000272195	rs7545078	RP11-156E8.1	1.92096	0.287223	2.26175e-11	0.106842	antisense	TRUE
chr1	cg12220753	ENSG00000121310	rs112988376	ECHDC2	-12.4917	2.08587	2.11451e-09	0.105086	protein_coding	TRUE
chr1	cg11309454	ENSG00000117226	rs34074694	GBP3	2.91681	0.518909	1.89795e-08	0.104961	protein_coding	TRUE
chr1	cg27563952	ENSG00000135828	rs610367	RNASEL	-6.05848	0.597378	3.60462e-24	0.104791	protein_coding	TRUE
chr1	cg14852267	ENSG00000130770	rs546569	ATPIF1	-33.9077	4.36564	8.04e-15	0.104598	protein_coding	TRUE
chr1	cg26362368	ENSG00000142655	rs2506892	PEX14	-10.4299	1.19805	3.15584e-18	0.103553	protein_coding	TRUE
chr1	cg21535942	ENSG00000116791	rs6662846	CRYZ	10.9057	2.2063	7.6935e-07	0.102977	protein_coding	TRUE
chr1	cg02350320	ENSG00000116514	rs12045975	RNF19B	11.5222	2.07997	3.03166e-08	0.101827	protein_coding	TRUE
chr1	cg16717532	ENSG00000196071	rs61857507	OR2L13	3.69303	0.627057	3.87455e-09	0.101331	protein_coding	TRUE
chr1	cg13502125	ENSG00000263956	rs76197525	NBPF11	7.4198	1.13616	6.55048e-11	0.101281	protein_coding	TRUE
chr1	cg16109817	ENSG00000179743	rs6666548	FLJ37453	0.882332	0.179022	8.28146e-07	0.10127	antisense	TRUE
chr1	cg12908607	ENSG00000117407	rs12127737	ARTN	0.423405	0.0744365	1.28439e-08	0.101264	protein_coding	TRUE
chr1	cg12548638	ENSG00000185090	rs56255580	MANEAL	3.69235	0.686784	7.60349e-08	0.101039	protein_coding	TRUE
chr1	cg14945834	ENSG00000227533	rs12750584	SLC2A1-AS1	-4.35155	0.316716	5.88122e-43	0.100994	lincRNA	TRUE
chr1	cg20229934	ENSG00000135828	rs620070	RNASEL	-13.2736	1.773	7.07223e-14	0.10099	protein_coding	TRUE
chr1	cg02148001	ENSG00000204624	rs12048424	DISP3	40.1513	7.60388	1.28924e-07	0.10071	protein_coding	TRUE
chr1	cg06792911	ENSG00000227533	rs17387775	SLC2A1-AS1	-5.10836	0.418149	2.53452e-34	0.0992298	lincRNA	TRUE
chr1	cg16819028	ENSG00000081277	rs12117501	PKP1	-90.0096	15.5287	6.77763e-09	0.097915	protein_coding	TRUE
chr1	cg09365446	ENSG00000143457	rs34154301	GOLPH3L	-2.76509	0.445046	5.19731e-10	0.0978542	protein_coding	TRUE
chr1	cg24013761	ENSG00000143036	rs3860356	SLC44A3	3.12164	0.569811	4.29272e-08	0.097854	protein_coding	TRUE
chr1	cg01646665	ENSG00000160781	rs2842859	PAQR6	12.2422	2.23374	4.23913e-08	0.0976474	protein_coding	TRUE
chr1	cg27425127	ENSG00000099260	rs4908005	PALMD	9.28019	1.83429	4.20845e-07	0.097378	protein_coding	TRUE
chr1	cg03760839	ENSG00000092607	rs201588069	TBX15	1.22487	0.249511	9.15121e-07	0.0971228	protein_coding	TRUE
chr1	cg05674944	ENSG00000158006	rs3008428	PAFAH2	5.31695	0.795522	2.33137e-11	0.0969494	protein_coding	TRUE
chr1	cg23864823	ENSG00000182134	rs10888429	TDRKH	6.09755	0.983411	5.63143e-10	0.0968947	protein_coding	TRUE
chr1	cg07157834	ENSG00000069275	rs1772143	NUCKS1	-24.0149	4.87421	8.35348e-07	0.0968602	protein_coding	TRUE
chr1	cg11170025	ENSG00000133059	rs1668871	DSTYK	14.2198	2.46175	7.63574e-09	0.0967773	protein_coding	TRUE
chr1	cg27571230	ENSG00000142655	rs2847344	PEX14	16.7769	2.1815	1.46529e-14	0.0967126	protein_coding	TRUE
chr1	cg16109817	ENSG00000186510	rs6666548	CLCNKA	-3.50591	0.578648	1.37139e-09	0.0964594	protein_coding	TRUE
chr1	cg12731430	ENSG00000116514	rs11448013	RNF19B	8.52476	1.56781	5.40753e-08	0.0964161	protein_coding	TRUE
chr1	cg07018435	ENSG00000227953	rs3935011	LINC01341	1.71577	0.316582	5.97052e-08	0.0960638	processed_transcript	TRUE
chr1	cg20055417	ENSG00000121310	rs1242331	ECHDC2	-9.39402	1.57834	2.65179e-09	0.0953521	protein_coding	TRUE
chr1	cg01200585	ENSG00000162913	rs10916277	C1orf145	0.781191	0.137096	1.21132e-08	0.0948609	protein_coding	TRUE
chr1	cg03732293	ENSG00000162779	rs4651024	AXDND1	1.93538	0.267238	4.41697e-13	0.0946519	protein_coding	TRUE
chr1	cg24543286	ENSG00000121310	rs112988376	ECHDC2	-13.415	2.23664	1.99956e-09	0.09454	protein_coding	TRUE
chr1	cg27033754	ENSG00000236200	rs150936757	KDM4A-AS1	5.80019	0.922863	3.2787e-10	0.0942318	antisense	TRUE
chr1	cg18845703	ENSG00000070785	rs10465876	EIF2B3	3.17155	0.645288	8.88113e-07	0.0935568	protein_coding	TRUE
chr1	cg08477332	ENSG00000189171	rs9726753	S100A13	1.45972	0.198846	2.12107e-13	0.0931463	protein_coding	TRUE
chr1	cg09824328	ENSG00000227533	rs71654267	SLC2A1-AS1	-2.62377	0.245259	1.0405e-26	0.0927937	lincRNA	TRUE
chr1	cg19693677	ENSG00000162688	rs35300938	AGL	-50.2184	10.1493	7.49834e-07	0.0925504	protein_coding	TRUE
chr1	cg21947136	ENSG00000249087	rs667329	ZNF436-AS1	1.22952	0.236573	2.02293e-07	0.0902739	antisense	TRUE
chr1	cg00837947	ENSG00000135828	rs610367	RNASEL	-10.681	1.18784	2.4275e-19	0.0898493	protein_coding	TRUE
chr1	cg16334093	ENSG00000069275	rs823074	NUCKS1	-17.164	3.39139	4.16984e-07	0.0890793	protein_coding	TRUE
chr1	cg27425127	ENSG00000162688	rs7543433	AGL	-32.6701	3.8225	1.26541e-17	0.0890742	protein_coding	TRUE
chr1	cg14159672	ENSG00000069275	rs823080	NUCKS1	-6.56536	1.28768	3.42185e-07	0.0889678	protein_coding	TRUE
chr1	cg05841700	ENSG00000069275	rs1772143	NUCKS1	-8.47357	1.66679	3.70043e-07	0.0876764	protein_coding	TRUE
chr1	cg18002154	ENSG00000116171	rs564640	SCP2	-29.6831	5.17726	9.8462e-09	0.087297	protein_coding	TRUE
chr1	cg07533224	ENSG00000069275	rs1772143	NUCKS1	-7.06901	1.37342	2.6469e-07	0.0858465	protein_coding	TRUE
chr1	cg24503407	ENSG00000069275	rs823080	NUCKS1	-11.6491	2.29957	4.06716e-07	0.0857358	protein_coding	TRUE
chr1	cg12978857	ENSG00000197429	rs1416706	IPP	3.88471	0.729263	9.98999e-08	0.085665	protein_coding	TRUE
chr1	cg02397727	ENSG00000158006	rs3008428	PAFAH2	6.72633	1.0715	3.44042e-10	0.0851501	protein_coding	TRUE
chr1	cg11965913	ENSG00000069275	rs1772143	NUCKS1	-5.62241	1.09466	2.80304e-07	0.0849998	protein_coding	TRUE
chr1	cg14810798	ENSG00000274895	rs340879	RP11-478J18.2	-11.6309	1.3914	6.32074e-17	0.0847483	antisense	TRUE
chr1	cg25758167	ENSG00000162688	rs7543433	AGL	-55.7557	6.83059	3.27752e-16	0.0847477	protein_coding	TRUE
chr1	cg14893161	ENSG00000069275	rs823080	NUCKS1	-7.04052	1.37389	2.98306e-07	0.0833381	protein_coding	TRUE
chr1	cg18546249	ENSG00000242485	rs9730511	MRPL20	4.44402	0.853599	1.92732e-07	0.0830306	protein_coding	TRUE
chr1	cg02244243	ENSG00000058668	rs4951204	ATP2B4	-207.574	41.6262	6.14429e-07	0.0824912	protein_coding	TRUE
chr1	cg07913096	ENSG00000270605	rs7518571	RP5-1092A3.4	-26.3584	3.09035	1.47256e-17	0.0811348	antisense	TRUE
chr1	cg23555638	ENSG00000116857	rs4915486	TMEM9	11.6016	1.93614	2.07086e-09	0.0803793	protein_coding	TRUE
chr1	cg20677516	ENSG00000228288	rs2275895	PCAT6	-7.92631	1.1075	8.25042e-13	0.0800014	antisense	TRUE
chr1	cg03362483	ENSG00000188672	rs61775244	RHCE	2.71002	0.337459	9.69286e-16	0.0799183	protein_coding	TRUE
chr1	cg18273593	ENSG00000237975	rs10443208	FLG-AS1	5.18991	0.898405	7.61315e-09	0.0788117	antisense	TRUE
chr1	cg19759212	ENSG00000160781	rs2296375	PAQR6	-2.3854	0.439061	5.54318e-08	0.0784655	protein_coding	TRUE
chr1	cg20650505	ENSG00000197429	rs9429095	IPP	5.89106	1.18398	6.50256e-07	0.0773004	protein_coding	TRUE
chr1	cg07883627	ENSG00000084072	rs1046988	PPIE	20.3187	1.92971	6.32356e-26	0.0769515	protein_coding	TRUE
chr1	cg09365446	ENSG00000163131	rs34154301	CTSS	3.10932	0.495926	3.61687e-10	0.0762563	protein_coding	TRUE
chr1	cg04837461	ENSG00000066027	rs12739715	PPP2R5A	-4.92748	0.881194	2.24698e-08	0.0761718	protein_coding	TRUE
chr1	cg06080068	ENSG00000142655	rs3215946	PEX14	-13.8827	2.01381	5.43346e-12	0.0747827	protein_coding	TRUE
chr1	cg11424069	ENSG00000143387	rs6657461	CTSK	12.0066	2.4018	5.76298e-07	0.073805	protein_coding	TRUE
chr1	cg10890233	ENSG00000162669	rs12408911	HFM1	8.19796	1.44863	1.52169e-08	0.0733176	protein_coding	TRUE
chr1	cg05909164	ENSG00000121310	rs112988376	ECHDC2	-11.4629	1.89705	1.51745e-09	0.0723298	protein_coding	TRUE
chr1	cg11078824	ENSG00000198952	rs933489	SMG5	-39.4267	6.65772	3.18153e-09	0.071222	protein_coding	TRUE
chr1	cg10512769	ENSG00000223649	rs12733443	RP11-359E8.3	-0.274189	0.040304	1.0244e-11	0.070516	lincRNA	TRUE
chr1	cg15390314	ENSG00000260855	rs7519873	RP11-439E19.10	-1.28934	0.262118	8.70192e-07	0.0680775	antisense	TRUE
chr1	cg05990710	ENSG00000231768	rs271761	LINC01354	-1.75993	0.328118	8.15329e-08	0.0679535	lincRNA	TRUE
chr1	cg10714509	ENSG00000231768	rs271761	LINC01354	-1.40697	0.260385	6.53777e-08	0.0652414	lincRNA	TRUE
chr1	cg21951975	ENSG00000117595	rs1005287	IRF6	-7.21454	1.19016	1.34595e-09	0.0647797	protein_coding	TRUE
chr1	cg15741663	ENSG00000188672	rs55794721	RHCE	-1.68971	0.29489	1.0045e-08	0.0647143	protein_coding	TRUE
chr1	cg15387114	ENSG00000142856	rs72918611	ITGB3BP	-3.34383	0.639534	1.70856e-07	0.0643745	protein_coding	TRUE
chr1	cg12479090	ENSG00000176393	rs12059693	RNPEP	4.10968	0.809133	3.79203e-07	0.0641224	protein_coding	TRUE
chr1	cg14204462	ENSG00000092607	rs200100774	TBX15	0.543886	0.0894702	1.20961e-09	0.0640808	protein_coding	TRUE
chr1	cg05660106	ENSG00000132906	rs111689880	CASP9	1.76493	0.324419	5.31975e-08	0.0637996	protein_coding	TRUE
chr1	cg07167872	ENSG00000158715	rs823074	SLC45A3	0.313106	0.0625672	5.60627e-07	0.0634653	protein_coding	TRUE
chr1	cg16334093	ENSG00000158715	rs823074	SLC45A3	0.508693	0.103142	8.14047e-07	0.063041	protein_coding	TRUE
chr1	cg14159672	ENSG00000158715	rs823080	SLC45A3	0.193627	0.0391867	7.76721e-07	0.0602251	protein_coding	TRUE
chr1	cg20029923	ENSG00000162669	rs282021	HFM1	-7.47707	1.36137	3.96716e-08	0.0601736	protein_coding	TRUE
chr1	cg26666107	ENSG00000162402	rs287231	USP24	13.2593	2.69215	8.42846e-07	0.0587347	protein_coding	TRUE
chr1	cg14893161	ENSG00000158715	rs823080	SLC45A3	0.20764	0.0418233	6.88045e-07	0.0573913	protein_coding	TRUE
chr1	cg18394614	ENSG00000142949	rs7520493	PTPRF	-24.4127	4.46361	4.51849e-08	0.0546692	protein_coding	TRUE
chr1	cg26010182	ENSG00000180867	rs182893885	PDIA3P1	-1.06674	0.127395	5.59261e-17	0.0539759	processed_pseudogene	TRUE
chr1	cg09003612	ENSG00000227533	rs17387775	SLC2A1-AS1	-2.61075	0.163219	1.37627e-57	0.0538285	lincRNA	TRUE
chr1	cg04072680	ENSG00000154027	rs35944959	AK5	-4.669	0.951344	9.21067e-07	0.0537887	protein_coding	TRUE
chr1	cg02987928	ENSG00000037637	rs3738631	FBXO42	22.3049	4.01852	2.8481e-08	0.0534186	protein_coding	TRUE
chr1	cg11965913	ENSG00000158715	rs1772143	SLC45A3	0.163906	0.0333163	8.66774e-07	0.0516514	protein_coding	TRUE
chr1	cg24525340	ENSG00000268575	rs2803295	RP1-283E3.8	-11.2076	1.87387	2.21766e-09	0.0515933	processed_transcript	TRUE
chr1	cg24503407	ENSG00000158715	rs823080	SLC45A3	0.343558	0.0699533	9.04978e-07	0.0513441	protein_coding	TRUE
chr1	cg23206461	ENSG00000263956	rs553657	NBPF11	7.50643	1.4745	3.56521e-07	0.0509476	protein_coding	TRUE
chr1	cg20630926	ENSG00000197429	rs9429095	IPP	3.36153	0.639721	1.48273e-07	0.0507107	protein_coding	TRUE
chr1	cg07533224	ENSG00000158715	rs1772143	SLC45A3	0.206078	0.041808	8.25848e-07	0.050073	protein_coding	TRUE
chr2	cg04077025	ENSG00000115306	rs35378964	SPTBN1	-184.049	37.1717	7.37089e-07	0.998849	protein_coding	TRUE
chr2	cg22084806	ENSG00000136682	rs3877318	CBWD2	-13.952	1.77882	4.38511e-15	0.99512	protein_coding	TRUE
chr2	cg08541846	ENSG00000236209	rs12366	AC104135.2	-1.61853	0.176669	5.12457e-20	0.990355	lincRNA	TRUE
chr2	cg13324389	ENSG00000223658	rs13001285	C1GALT1C1L	-1.15023	0.190147	1.45615e-09	0.989433	protein_coding	TRUE
chr2	cg12164063	ENSG00000144028	rs57406815	SNRNP200	-38.2089	3.91107	1.52332e-22	0.987215	protein_coding	TRUE
chr2	cg18817560	ENSG00000223658	rs13001285	C1GALT1C1L	-1.33522	0.246542	6.1016e-08	0.986714	protein_coding	TRUE
chr2	cg24674087	ENSG00000079785	rs73915402	DDX1	-44.7056	8.48755	1.3852e-07	0.985869	protein_coding	TRUE
chr2	cg26102065	ENSG00000128699	rs142544709	ORMDL1	34.4735	6.42419	8.04117e-08	0.969975	protein_coding	TRUE
chr2	cg10293909	ENSG00000236209	rs12366	AC104135.2	-0.461829	0.0431194	9.08939e-27	0.961097	lincRNA	TRUE
chr2	cg03170698	ENSG00000135636	rs78820776	DYSF	3.43367	0.648415	1.18699e-07	0.959561	protein_coding	TRUE
chr2	cg22830273	ENSG00000168702	rs1882164	LRP1B	-10.0444	1.72439	5.71423e-09	0.958856	protein_coding	TRUE
chr2	cg23949265	ENSG00000170500	rs1811415	LONRF2	-113.492	19.2555	3.76902e-09	0.956601	protein_coding	TRUE
chr2	cg24828208	ENSG00000176720	rs56211918	BOK	-5.3639	0.801883	2.24512e-11	0.955265	protein_coding	TRUE
chr2	cg06970082	ENSG00000079785	rs56002839	DDX1	-19.8352	2.8705	4.84618e-12	0.952391	protein_coding	TRUE
chr2	cg04297999	ENSG00000152672	rs34651755	CLEC4F	-33.5731	6.0613	3.04325e-08	0.945414	protein_coding	TRUE
chr2	cg23290912	ENSG00000224272	rs34381460	AC114730.3	-5.73655	1.02465	2.16176e-08	0.942085	antisense	TRUE
chr2	cg25276246	ENSG00000162878	rs4952398	PKDCC	-32.1367	6.10876	1.43463e-07	0.934667	protein_coding	TRUE
chr2	cg11706790	ENSG00000224272	rs34381460	AC114730.3	-3.6633	0.529249	4.46264e-12	0.933269	antisense	TRUE
chr2	cg17974684	ENSG00000135636	rs13032033	DYSF	3.45335	0.614618	1.92404e-08	0.932245	protein_coding	TRUE
chr2	cg03135853	ENSG00000115252	rs2195880	PDE1A	-2.3455	0.298736	4.11358e-15	0.928584	protein_coding	TRUE
chr2	cg21550016	ENSG00000189223	rs11123170	PAX8-AS1	-16.6913	2.28343	2.67653e-13	0.927455	processed_transcript	TRUE
chr2	cg05890377	ENSG00000217702	rs72915068	RP11-287D1.4	4.57674	0.835771	4.34889e-08	0.927132	lincRNA	TRUE
chr2	cg25237894	ENSG00000182600	rs2592115	C2orf82	-2.31344	0.404361	1.05766e-08	0.925915	protein_coding	TRUE
chr2	cg05776053	ENSG00000217702	rs13413795	RP11-287D1.4	5.12753	0.902239	1.32263e-08	0.918955	lincRNA	TRUE
chr2	cg02675527	ENSG00000189223	rs7576384	PAX8-AS1	30.6183	4.49323	9.47161e-12	0.918327	processed_transcript	TRUE
chr2	cg23410980	ENSG00000115486	rs7568458	GGCX	31.3434	6.0059	1.80126e-07	0.915993	protein_coding	TRUE
chr2	cg10504150	ENSG00000224272	rs34381460	AC114730.3	-6.72577	1.11903	1.85089e-09	0.913409	antisense	TRUE
chr2	cg16435511	ENSG00000068615	rs2241432	REEP1	-47.3868	8.34871	1.37929e-08	0.911409	protein_coding	TRUE
chr2	cg16599744	ENSG00000280119	rs113052758	AC093642.1	-2.78861	0.3233	6.38434e-18	0.910847	TEC	TRUE
chr2	cg23156509	ENSG00000189223	rs7576384	PAX8-AS1	35.4626	5.58758	2.20001e-10	0.907503	processed_transcript	TRUE
chr2	cg18140058	ENSG00000121152	rs57406815	NCAPH	5.06792	0.720441	2.0002e-12	0.905025	protein_coding	TRUE
chr2	cg09325404	ENSG00000223658	rs35735089	C1GALT1C1L	-1.69829	0.338048	5.06555e-07	0.903613	protein_coding	TRUE
chr2	cg07594247	ENSG00000189223	rs7576384	PAX8-AS1	-32.943	5.30475	5.29498e-10	0.895821	processed_transcript	TRUE
chr2	cg14399236	ENSG00000135951	rs5832868	TSGA10	13.9946	1.4413	2.74097e-22	0.894608	protein_coding	TRUE
chr2	cg17054006	ENSG00000115252	rs150764652	PDE1A	-2.13986	0.24695	4.50759e-18	0.892171	protein_coding	TRUE
chr2	cg02756915	ENSG00000280119	rs6734937	AC093642.1	-3.39617	0.522179	7.82983e-11	0.890456	TEC	TRUE
chr2	cg07772999	ENSG00000189223	rs11123170	PAX8-AS1	-24.354	3.37934	5.73034e-13	0.889852	processed_transcript	TRUE
chr2	cg06689416	ENSG00000006607	rs34489347	FARP2	7.45706	1.51311	8.29552e-07	0.883562	protein_coding	TRUE
chr2	cg15370332	ENSG00000135636	rs6717013	DYSF	-5.52588	1.0845	3.4815e-07	0.882555	protein_coding	TRUE
chr2	cg16440984	ENSG00000134324	rs3795974	LPIN1	-177.424	30.4751	5.81681e-09	0.879447	protein_coding	TRUE
chr2	cg04297999	ENSG00000116031	rs34651755	CD207	-7.76337	1.43562	6.38457e-08	0.879289	protein_coding	TRUE
chr2	cg08726338	ENSG00000223658	rs35370155	C1GALT1C1L	-2.09783	0.38021	3.43739e-08	0.877898	protein_coding	TRUE
chr2	cg06675538	ENSG00000189223	rs11123170	PAX8-AS1	38.021	5.47793	3.89969e-12	0.862606	processed_transcript	TRUE
chr2	cg15496985	ENSG00000158411	rs7572660	MITD1	-6.69837	1.14975	5.67988e-09	0.860392	protein_coding	TRUE
chr2	cg11763394	ENSG00000189223	rs7576384	PAX8-AS1	-17.3042	2.4033	6.01244e-13	0.859262	processed_transcript	TRUE
chr2	cg23692114	ENSG00000236209	rs7586613	AC104135.2	-1.33224	0.165068	6.98324e-16	0.853704	lincRNA	TRUE
chr2	cg19083407	ENSG00000189223	rs7576384	PAX8-AS1	-16.8178	2.30477	2.94374e-13	0.845039	processed_transcript	TRUE
chr2	cg07346182	ENSG00000136717	rs749008	BIN1	-70.3928	13.206	9.80271e-08	0.840841	protein_coding	TRUE
chr2	cg06402816	ENSG00000180902	rs10755057	D2HGDH	-2.72148	0.526497	2.35311e-07	0.84045	protein_coding	TRUE
chr2	cg14860182	ENSG00000144028	rs2276648	SNRNP200	124.576	16.2502	1.77229e-14	0.840172	protein_coding	TRUE
chr2	cg08983217	ENSG00000144028	rs62153922	SNRNP200	172.213	28.9008	2.54187e-09	0.839756	protein_coding	TRUE
chr2	cg07162735	ENSG00000180398	rs56176930	MCFD2	-138.469	26.1566	1.19777e-07	0.827706	protein_coding	TRUE
chr2	cg03441835	ENSG00000171103	rs10198789	TRMT61B	-14.3742	2.52743	1.29073e-08	0.818074	protein_coding	TRUE
chr2	cg00067424	ENSG00000171103	rs6710080	TRMT61B	-7.9406	1.51786	1.68183e-07	0.81697	protein_coding	TRUE
chr2	cg11040329	ENSG00000072135	rs3739123	PTPN18	-7.30636	0.980171	9.04415e-14	0.814319	protein_coding	TRUE
chr2	cg01577475	ENSG00000189223	rs11123170	PAX8-AS1	17.6332	2.91188	1.39896e-09	0.813685	processed_transcript	TRUE
chr2	cg04331189	ENSG00000196151	rs2159876	WDSUB1	-9.18487	1.47234	4.42399e-10	0.813285	protein_coding	TRUE
chr2	cg03891849	ENSG00000115041	rs35740604	KCNIP3	3.56709	0.635782	2.01674e-08	0.805986	protein_coding	TRUE
chr2	cg03595348	ENSG00000115041	rs3772032	KCNIP3	0.635578	0.0797311	1.56736e-15	0.805502	protein_coding	TRUE
chr2	cg22412063	ENSG00000163006	rs826582	CCDC138	-2.23564	0.422469	1.21089e-07	0.804499	protein_coding	TRUE
chr2	cg02717117	ENSG00000162994	rs17046778	CLHC1	-4.65562	0.680068	7.60395e-12	0.796659	protein_coding	TRUE
chr2	cg12164063	ENSG00000121152	rs57406815	NCAPH	-1.28534	0.110699	3.61973e-31	0.796231	protein_coding	TRUE
chr2	cg07880854	ENSG00000144152	rs4849007	FBLN7	-3.31206	0.596622	2.83469e-08	0.794587	protein_coding	TRUE
chr2	cg24429037	ENSG00000224272	rs35512023	AC114730.3	-4.12739	0.65125	2.33322e-10	0.790939	antisense	TRUE
chr2	cg14436272	ENSG00000171596	rs34693999	NMUR1	-6.53011	0.664589	8.71788e-23	0.788497	protein_coding	TRUE
chr2	cg14399236	ENSG00000158411	rs5832868	MITD1	-8.44976	1.53036	3.36246e-08	0.78825	protein_coding	TRUE
chr2	cg23831876	ENSG00000115902	rs6757930	SLC1A4	-30.0956	5.21979	8.1326e-09	0.784225	protein_coding	TRUE
chr2	cg18095041	ENSG00000224272	rs35512023	AC114730.3	-5.61532	0.994451	1.636e-08	0.780622	antisense	TRUE
chr2	cg09318169	ENSG00000197927	rs6720375	C2orf27A	0.769489	0.101667	3.77016e-14	0.778368	transcribed_unprocessed_pseudogene	TRUE
chr2	cg24470804	ENSG00000135972	rs11326307	MRPS9	25.1595	3.82321	4.68171e-11	0.776924	protein_coding	TRUE
chr2	cg19288921	ENSG00000280119	rs6761036	AC093642.1	-3.51568	0.465229	4.12816e-14	0.771669	TEC	TRUE
chr2	cg00672622	ENSG00000135636	rs6725697	DYSF	1.98152	0.289853	8.12711e-12	0.770294	protein_coding	TRUE
chr2	cg17096356	ENSG00000224272	rs35512023	AC114730.3	-6.94357	1.27992	5.79519e-08	0.769417	antisense	TRUE
chr2	cg02675527	ENSG00000125618	rs7576384	PAX8	2.70263	0.536598	4.73855e-07	0.768434	protein_coding	TRUE
chr2	cg00143376	ENSG00000171596	rs112143922	NMUR1	-23.0285	3.06594	5.86455e-14	0.766566	protein_coding	TRUE
chr2	cg11502844	ENSG00000079785	rs4668951	DDX1	26.0895	5.04099	2.27324e-07	0.763006	protein_coding	TRUE
chr2	cg00570673	ENSG00000273240	rs11685425	RP11-455J20.3	-1.47229	0.254493	7.24354e-09	0.762472	antisense	TRUE
chr2	cg19083407	ENSG00000125618	rs7576384	PAX8	-1.48448	0.284255	1.76645e-07	0.760698	protein_coding	TRUE
chr2	cg14399236	ENSG00000144182	rs5832868	LIPT1	4.52038	0.523483	5.86209e-18	0.758004	protein_coding	TRUE
chr2	cg20891558	ENSG00000217702	rs4563249	RP11-287D1.4	3.11282	0.393208	2.44346e-15	0.753241	lincRNA	TRUE
chr2	cg19151604	ENSG00000224272	rs35512023	AC114730.3	-5.46841	0.86639	2.75952e-10	0.75207	antisense	TRUE
chr2	cg25913016	ENSG00000115993	rs59674665	TRAK2	-36.0393	5.18579	3.6624e-12	0.739754	protein_coding	TRUE
chr2	cg10034588	ENSG00000171596	rs113387157	NMUR1	-10.5217	1.15638	9.13186e-20	0.738001	protein_coding	TRUE
chr2	cg24977027	ENSG00000144115	rs6547757	THNSL2	-21.2712	2.24959	3.21163e-21	0.735413	protein_coding	TRUE
chr2	cg00327537	ENSG00000114978	rs1667601	MOB1A	-10.4413	1.77957	4.42864e-09	0.731229	protein_coding	TRUE
chr2	cg11538967	ENSG00000136717	rs6720234	BIN1	-50.2286	8.62694	5.80456e-09	0.729063	protein_coding	TRUE
chr2	cg07772999	ENSG00000125618	rs11123170	PAX8	-2.11454	0.408181	2.21399e-07	0.719396	protein_coding	TRUE
chr2	cg19921829	ENSG00000144231	rs3771290	POLR2D	3.88299	0.657531	3.51789e-09	0.718899	protein_coding	TRUE
chr2	cg17445212	ENSG00000189223	rs7578633	PAX8-AS1	-25.1944	3.51508	7.63686e-13	0.718021	processed_transcript	TRUE
chr2	cg11105575	ENSG00000144026	rs71427029	ZNF514	-77.8156	15.4665	4.87358e-07	0.715973	protein_coding	TRUE
chr2	cg11517309	ENSG00000068615	rs2241432	REEP1	50.9678	10.2496	6.6039e-07	0.715066	protein_coding	TRUE
chr2	cg06964132	ENSG00000170500	rs34088546	LONRF2	-91.6546	16.5748	3.20681e-08	0.71351	protein_coding	TRUE
chr2	cg16570455	ENSG00000236209	rs13013787	AC104135.2	-1.53828	0.210833	2.96069e-13	0.7118	lincRNA	TRUE
chr2	cg03844611	ENSG00000114933	rs10166836	INO80D	3.09379	0.44768	4.82186e-12	0.711755	protein_coding	TRUE
chr2	cg06277347	ENSG00000144028	rs62153900	SNRNP200	162.807	24.3762	2.40729e-11	0.708808	protein_coding	TRUE
chr2	cg05027052	ENSG00000162994	rs17046778	CLHC1	-5.88686	0.830171	1.33014e-12	0.706836	protein_coding	TRUE
chr2	cg06044455	ENSG00000122085	rs2240541	MTERF4	-52.4904	6.88049	2.36821e-14	0.705079	protein_coding	TRUE
chr2	cg21550016	ENSG00000125618	rs11123170	PAX8	-1.44922	0.277721	1.80601e-07	0.705007	protein_coding	TRUE
chr2	cg21542459	ENSG00000158411	rs5832868	MITD1	-2.44603	0.418452	5.05309e-09	0.704351	protein_coding	TRUE
chr2	cg07109592	ENSG00000115762	rs11685313	PLEKHB2	18.2397	3.66912	6.65667e-07	0.703603	protein_coding	TRUE
chr2	cg19744723	ENSG00000121152	rs4907307	NCAPH	10.3055	1.7547	4.27719e-09	0.702009	protein_coding	TRUE
chr2	cg23923311	ENSG00000224272	rs35512023	AC114730.3	-3.94955	0.451606	2.21886e-18	0.701681	antisense	TRUE
chr2	cg26648037	ENSG00000132305	rs35957458	IMMT	-20.2184	3.43613	4.00327e-09	0.70088	protein_coding	TRUE
chr2	cg18140058	ENSG00000144028	rs57406815	SNRNP200	150.652	22.9807	5.54175e-11	0.698595	protein_coding	TRUE
chr2	cg22945872	ENSG00000153832	rs76396572	FBXO36	-6.23012	1.18569	1.48493e-07	0.696961	protein_coding	TRUE
chr2	cg24812398	ENSG00000171853	rs7573231	TRAPPC12	-3.40368	0.566339	1.85564e-09	0.695546	protein_coding	TRUE
chr2	cg11027822	ENSG00000091409	rs9287954	ITGA6	-25.7567	1.82016	1.84648e-45	0.695351	protein_coding	TRUE
chr2	cg00144550	ENSG00000170500	rs34088546	LONRF2	-79.9646	12.058	3.31908e-11	0.692677	protein_coding	TRUE
chr2	cg10556330	ENSG00000091409	rs9287954	ITGA6	-135.204	15.8108	1.21636e-17	0.692319	protein_coding	TRUE
chr2	cg27485108	ENSG00000171303	rs10201737	KCNK3	6.80481	1.38564	9.0633e-07	0.689429	protein_coding	TRUE
chr2	cg13586889	ENSG00000091409	rs12620581	ITGA6	-41.2336	3.38829	4.52269e-34	0.688188	protein_coding	TRUE
chr2	cg00422909	ENSG00000189223	rs7576384	PAX8-AS1	-60.9788	11.3994	8.8302e-08	0.683993	processed_transcript	TRUE
chr2	cg10929210	ENSG00000115423	rs7561462	DNAH6	-21.7847	4.24875	2.93908e-07	0.677418	protein_coding	TRUE
chr2	cg09773141	ENSG00000135972	rs7604397	MRPS9	12.1342	1.88932	1.34019e-10	0.676916	protein_coding	TRUE
chr2	cg06892601	ENSG00000224272	rs34381460	AC114730.3	-4.09005	0.462998	1.01151e-18	0.675371	antisense	TRUE
chr2	cg19729930	ENSG00000217702	rs111321297	RP11-287D1.4	3.94155	0.55908	1.7883e-12	0.675348	lincRNA	TRUE
chr2	cg16965027	ENSG00000135636	rs12478953	DYSF	2.53032	0.445466	1.34571e-08	0.675304	protein_coding	TRUE
chr2	cg26336264	ENSG00000162994	rs17046778	CLHC1	-6.40278	0.857718	8.33599e-14	0.673976	protein_coding	TRUE
chr2	cg26886277	ENSG00000068615	rs2367200	REEP1	71.4598	14.4392	7.45932e-07	0.671067	protein_coding	TRUE
chr2	cg10504150	ENSG00000237940	rs34381460	AC093642.3	-3.2717	0.588075	2.64559e-08	0.665803	lincRNA	TRUE
chr2	cg04845466	ENSG00000115241	rs35551468	PPM1G	13.8273	2.33752	3.31147e-09	0.664857	protein_coding	TRUE
chr2	cg17611880	ENSG00000151353	rs4854351	TMEM18	3.67317	0.555735	3.85433e-11	0.663049	protein_coding	TRUE
chr2	cg19325132	ENSG00000217702	rs77148265	RP11-287D1.4	3.69491	0.467615	2.75325e-15	0.662688	lincRNA	TRUE
chr2	cg22911477	ENSG00000197927	rs6720375	C2orf27A	1.04619	0.149979	3.0458e-12	0.661028	transcribed_unprocessed_pseudogene	TRUE
chr2	cg01200177	ENSG00000144231	rs3771290	POLR2D	3.49655	0.573291	1.06672e-09	0.659728	protein_coding	TRUE
chr2	cg07880854	ENSG00000278962	rs4849007	RP11-399B17.1	-3.11346	0.540677	8.48869e-09	0.659181	TEC	TRUE
chr2	cg17445212	ENSG00000125618	rs7578633	PAX8	-2.18771	0.423488	2.39227e-07	0.651007	protein_coding	TRUE
chr2	cg06675538	ENSG00000125618	rs11123170	PAX8	3.30118	0.649977	3.79571e-07	0.648523	protein_coding	TRUE
chr2	cg08764971	ENSG00000091409	rs9287954	ITGA6	-75.2558	7.3637	1.6162e-24	0.647293	protein_coding	TRUE
chr2	cg21482265	ENSG00000125618	rs7576384	PAX8	-2.07187	0.420384	8.28578e-07	0.645065	protein_coding	TRUE
chr2	cg13789186	ENSG00000135951	rs11123761	TSGA10	20.8721	2.16895	6.38687e-22	0.643179	protein_coding	TRUE
chr2	cg25654774	ENSG00000134324	rs3795974	LPIN1	-97.6047	17.3245	1.76158e-08	0.639212	protein_coding	TRUE
chr2	cg08401837	ENSG00000189350	rs112246861	FAM179A	-0.638039	0.0712966	3.5848e-19	0.639183	protein_coding	TRUE
chr2	cg11185688	ENSG00000273240	rs10207346	RP11-455J20.3	-0.549433	0.071204	1.19733e-14	0.636775	antisense	TRUE
chr2	cg17096356	ENSG00000237940	rs35512023	AC093642.3	-3.33466	0.658151	4.04746e-07	0.636325	lincRNA	TRUE
chr2	cg19220282	ENSG00000115902	rs57350083	SLC1A4	-19.4962	3.06384	1.9742e-10	0.633085	protein_coding	TRUE
chr2	cg03844611	ENSG00000023228	rs10166836	NDUFS1	-8.51319	0.9558	5.24917e-19	0.626229	protein_coding	TRUE
chr2	cg13182602	ENSG00000136717	rs35322174	BIN1	-42.5484	7.60993	2.25554e-08	0.604859	protein_coding	TRUE
chr2	cg11763394	ENSG00000125618	rs7576384	PAX8	-1.52742	0.294495	2.14213e-07	0.604624	protein_coding	TRUE
chr2	cg15872103	ENSG00000240356	rs13431015	RPL23AP7	-9.67287	1.94869	6.91301e-07	0.603172	transcribed_processed_pseudogene	TRUE
chr2	cg14217584	ENSG00000115041	rs1862897	KCNIP3	3.31248	0.628276	1.34702e-07	0.602665	protein_coding	TRUE
chr2	cg02452253	ENSG00000169629	rs77819812	RGPD8	-47.9215	7.96777	1.80534e-09	0.601337	protein_coding	TRUE
chr2	cg11676442	ENSG00000144152	rs4613287	FBLN7	-5.10252	0.956104	9.4608e-08	0.600209	protein_coding	TRUE
chr2	cg14706852	ENSG00000236682	rs3893313	AC068282.3	21.8161	3.65839	2.47165e-09	0.600126	lincRNA	TRUE
chr2	cg26034168	ENSG00000224272	rs4569516	AC114730.3	-11.2277	2.22642	4.58462e-07	0.596317	antisense	TRUE
chr2	cg13789186	ENSG00000158411	rs11123761	MITD1	-12.8654	2.35625	4.75857e-08	0.596096	protein_coding	TRUE
chr2	cg23392804	ENSG00000118997	rs73044664	DNAH7	-27.7275	4.6046	1.72594e-09	0.595981	protein_coding	TRUE
chr2	cg01299579	ENSG00000243819	rs149307648	RN7SL832P	-0.396886	0.0754714	1.45029e-07	0.594051	lincRNA	TRUE
chr2	cg20698421	ENSG00000115902	rs6757930	SLC1A4	-21.5993	3.34968	1.13207e-10	0.592393	protein_coding	TRUE
chr2	cg20874670	ENSG00000072135	rs201809436	PTPN18	-11.5098	2.11823	5.52092e-08	0.585679	protein_coding	TRUE
chr2	cg14520482	ENSG00000079785	rs16862788	DDX1	31.259	5.94258	1.43923e-07	0.583686	protein_coding	TRUE
chr2	cg16795804	ENSG00000115808	rs4670662	STRN	7.92717	1.60774	8.19702e-07	0.582263	protein_coding	TRUE
chr2	cg10973622	ENSG00000132305	rs13011139	IMMT	-5.62509	0.610858	3.30696e-20	0.575778	protein_coding	TRUE
chr2	cg04069811	ENSG00000132305	rs79402359	IMMT	17.675	3.5376	5.84387e-07	0.572447	protein_coding	TRUE
chr2	cg10504150	ENSG00000280119	rs34381460	AC093642.1	-3.70973	0.735321	4.53399e-07	0.561984	TEC	TRUE
chr2	cg21926883	ENSG00000170500	rs58425541	LONRF2	-35.7844	3.78233	3.0517e-21	0.558909	protein_coding	TRUE
chr2	cg20371505	ENSG00000143970	rs10198667	ASXL2	-17.8679	3.37773	1.22369e-07	0.55668	protein_coding	TRUE
chr2	cg10397934	ENSG00000237940	rs6734937	AC093642.3	-3.77241	0.675704	2.36491e-08	0.55156	lincRNA	TRUE
chr2	cg08487618	ENSG00000198648	rs16854955	STK39	-56.8029	9.90988	9.92843e-09	0.551238	protein_coding	TRUE
chr2	cg07909619	ENSG00000217702	rs56168672	RP11-287D1.4	-2.89992	0.530237	4.52316e-08	0.550057	lincRNA	TRUE
chr2	cg21482265	ENSG00000189223	rs7576384	PAX8-AS1	-23.4723	3.58164	5.62e-11	0.547996	processed_transcript	TRUE
chr2	cg09390137	ENSG00000280119	rs6761036	AC093642.1	-3.14897	0.367633	1.07579e-17	0.546824	TEC	TRUE
chr2	cg14860182	ENSG00000121152	rs2276648	NCAPH	4.06198	0.481616	3.33853e-17	0.543889	protein_coding	TRUE
chr2	cg18289156	ENSG00000115423	rs7575751	DNAH6	-11.4436	1.77117	1.03989e-10	0.540329	protein_coding	TRUE
chr2	cg10814190	ENSG00000135951	rs34554984	TSGA10	-30.965	5.92042	1.69322e-07	0.539105	protein_coding	TRUE
chr2	cg19905587	ENSG00000152291	rs7605890	TGOLN2	-24.254	4.86141	6.06662e-07	0.538828	protein_coding	TRUE
chr2	cg24269863	ENSG00000122085	rs75811104	MTERF4	76.0603	14.8455	2.99996e-07	0.535924	protein_coding	TRUE
chr2	cg22872692	ENSG00000198648	rs3769392	STK39	-86.9231	16.0644	6.27073e-08	0.530223	protein_coding	TRUE
chr2	cg01876978	ENSG00000134324	rs4640359	LPIN1	-66.5787	12.3907	7.73252e-08	0.527281	protein_coding	TRUE
chr2	cg18419276	ENSG00000144028	rs149859993	SNRNP200	-85.0356	13.5266	3.2462e-10	0.521522	protein_coding	TRUE
chr2	cg22061832	ENSG00000091409	rs12620581	ITGA6	-98.485	19.8038	6.59133e-07	0.513255	protein_coding	TRUE
chr2	cg09704166	ENSG00000189223	rs7576384	PAX8-AS1	39.8519	6.56085	1.2461e-09	0.504179	processed_transcript	TRUE
chr2	cg08297393	ENSG00000170500	rs12621892	LONRF2	-40.8979	4.10399	2.15982e-23	0.503847	protein_coding	TRUE
chr2	cg05409597	ENSG00000138356	rs35277151	AOX1	3.32806	0.533221	4.33593e-10	0.503799	protein_coding	TRUE
chr2	cg25556006	ENSG00000115145	rs11424941	STAM2	-11.0435	2.04067	6.24205e-08	0.501416	protein_coding	TRUE
chr2	cg06091295	ENSG00000136717	rs749008	BIN1	-71.3378	12.4011	8.7922e-09	0.496573	protein_coding	TRUE
chr2	cg09024069	ENSG00000119042	rs7567954	SATB2	-1.88087	0.378231	6.5993e-07	0.496239	protein_coding	TRUE
chr2	cg06425843	ENSG00000136717	rs35322174	BIN1	-70.7936	13.1955	8.09595e-08	0.495004	protein_coding	TRUE
chr2	cg07258474	ENSG00000134324	rs4640359	LPIN1	54.8381	10.512	1.82129e-07	0.492896	protein_coding	TRUE
chr2	cg15978565	ENSG00000134324	rs4640359	LPIN1	-45.3039	8.96778	4.3755e-07	0.486419	protein_coding	TRUE
chr2	cg22748895	ENSG00000189350	rs112246861	FAM179A	-0.335662	0.0323556	3.25129e-25	0.479263	protein_coding	TRUE
chr2	cg09288230	ENSG00000091409	rs9287954	ITGA6	-75.5209	7.38122	1.43294e-24	0.476533	protein_coding	TRUE
chr2	cg12807937	ENSG00000130414	rs10153593	NDUFA10	-37.3242	5.42282	5.8691e-12	0.47275	protein_coding	TRUE
chr2	cg03674127	ENSG00000135636	rs71414897	DYSF	1.15876	0.198601	5.39086e-09	0.471566	protein_coding	TRUE
chr2	cg21542459	ENSG00000135951	rs5832868	TSGA10	4.05115	0.340672	1.30793e-32	0.47044	protein_coding	TRUE
chr2	cg13140267	ENSG00000144028	rs62153035	SNRNP200	-98.144	14.6386	2.02167e-11	0.467598	protein_coding	TRUE
chr2	cg17273725	ENSG00000154518	rs268172	ATP5G3	-36.1707	5.69282	2.10151e-10	0.466771	protein_coding	TRUE
chr2	cg27010375	ENSG00000068615	rs1010239	REEP1	-35.6933	5.12998	3.45647e-12	0.465333	protein_coding	TRUE
chr2	cg08925102	ENSG00000144115	rs10865489	THNSL2	-49.918	7.69961	8.98053e-11	0.458591	protein_coding	TRUE
chr2	cg20660182	ENSG00000153094	rs36018702	BCL2L11	3.71426	0.755335	8.77166e-07	0.453819	protein_coding	TRUE
chr2	cg21747090	ENSG00000234072	rs13472	AC074117.10	10.9039	1.64239	3.15754e-11	0.45351	antisense	TRUE
chr2	cg11027058	ENSG00000135636	rs11684580	DYSF	0.929244	0.142433	6.84153e-11	0.451023	protein_coding	TRUE
chr2	cg10397934	ENSG00000280119	rs6734937	AC093642.1	-5.53601	0.993939	2.55073e-08	0.450075	TEC	TRUE
chr2	cg07301105	ENSG00000171596	rs2008114	NMUR1	29.5022	5.4419	5.9165e-08	0.448996	protein_coding	TRUE
chr2	cg14958017	ENSG00000135636	rs12478953	DYSF	3.20908	0.547003	4.44675e-09	0.448991	protein_coding	TRUE
chr2	cg08795597	ENSG00000198648	rs7569501	STK39	62.8181	10.4518	1.85193e-09	0.446772	protein_coding	TRUE
chr2	cg14399236	ENSG00000273045	rs5832868	C2orf15	1.01905	0.198367	2.78877e-07	0.446772	protein_coding	TRUE
chr2	cg23655155	ENSG00000068654	rs2288120	POLR1A	8.3133	0.778823	1.34432e-26	0.4431	protein_coding	TRUE
chr2	cg06150863	ENSG00000237940	rs13018275	AC093642.3	-2.14012	0.363795	4.03478e-09	0.440206	lincRNA	TRUE
chr2	cg24494155	ENSG00000115423	rs7575751	DNAH6	19.8861	3.71925	8.95271e-08	0.439905	protein_coding	TRUE
chr2	cg01389413	ENSG00000151694	rs34268740	ADAM17	-41.4836	6.29793	4.492e-11	0.437467	protein_coding	TRUE
chr2	cg06277347	ENSG00000121152	rs62153900	NCAPH	5.27576	0.737024	8.17453e-13	0.435178	protein_coding	TRUE
chr2	cg08983217	ENSG00000121152	rs62153922	NCAPH	5.33953	0.859004	5.10122e-10	0.424553	protein_coding	TRUE
chr2	cg10814190	ENSG00000144182	rs34554984	LIPT1	-9.38969	1.90281	8.02987e-07	0.423989	protein_coding	TRUE
chr2	cg09592272	ENSG00000135951	rs35439305	TSGA10	18.489	2.89121	1.60663e-10	0.422948	protein_coding	TRUE
chr2	cg00012203	ENSG00000163466	rs10206984	ARPC2	27.321	3.18545	9.7538e-18	0.422827	protein_coding	TRUE
chr2	cg24364398	ENSG00000068615	rs6725046	REEP1	47.0177	7.34477	1.53839e-10	0.421604	protein_coding	TRUE
chr2	cg11182421	ENSG00000115993	rs6435084	TRAK2	31.5705	5.6655	2.51244e-08	0.420816	protein_coding	TRUE
chr2	cg18419276	ENSG00000121152	rs149859993	NCAPH	-2.78395	0.41473	1.91088e-11	0.419964	protein_coding	TRUE
chr2	cg02292364	ENSG00000144026	rs12996789	ZNF514	-43.1415	6.77742	1.94693e-10	0.419184	protein_coding	TRUE
chr2	cg10536276	ENSG00000189223	rs3828189	PAX8-AS1	-14.7735	2.07122	9.8393e-13	0.418244	processed_transcript	TRUE
chr2	cg15423357	ENSG00000224165	rs10182458	DNAJC27-AS1	-4.63908	0.871052	1.00492e-07	0.414886	antisense	TRUE
chr2	cg26872305	ENSG00000198648	rs6433044	STK39	-45.5953	6.66919	8.1031e-12	0.414044	protein_coding	TRUE
chr2	cg08396863	ENSG00000127824	rs939574	TUBA4A	-7.69532	1.06999	6.38839e-13	0.413502	protein_coding	TRUE
chr2	cg04184094	ENSG00000127838	rs1473901	PNKD	-1.28266	0.243961	1.45928e-07	0.408828	protein_coding	TRUE
chr2	cg24530074	ENSG00000091409	rs12620581	ITGA6	-40.1436	3.14706	2.89026e-37	0.408462	protein_coding	TRUE
chr2	cg25449415	ENSG00000170500	rs200098652	LONRF2	-114.991	23.035	5.97586e-07	0.406236	protein_coding	TRUE
chr2	cg00492362	ENSG00000115041	rs4854244	KCNIP3	-1.49853	0.236559	2.37786e-10	0.40576	protein_coding	TRUE
chr2	cg21542459	ENSG00000273045	rs5832868	C2orf15	0.294993	0.0546786	6.85135e-08	0.401731	protein_coding	TRUE
chr2	cg19744723	ENSG00000144028	rs4907307	SNRNP200	296.049	53.9437	4.06275e-08	0.399296	protein_coding	TRUE
chr2	cg13431910	ENSG00000136717	rs35322174	BIN1	-58.3987	10.8564	7.48161e-08	0.399293	protein_coding	TRUE
chr2	cg06757995	ENSG00000115993	rs139575450	TRAK2	-42.0268	8.08181	1.99102e-07	0.398868	protein_coding	TRUE
chr2	cg00976125	ENSG00000163016	rs6546826	ALMS1P1	8.11145	1.23255	4.67277e-11	0.398452	transcribed_unprocessed_pseudogene	TRUE
chr2	cg09538587	ENSG00000183091	rs35555907	NEB	3.07281	0.490856	3.84732e-10	0.396633	protein_coding	TRUE
chr2	cg08992565	ENSG00000121989	rs11284106	ACVR2A	-5.50579	1.09019	4.41124e-07	0.396546	protein_coding	TRUE
chr2	cg04845466	ENSG00000234072	rs35551468	AC074117.10	-22.1452	3.43089	1.08479e-10	0.395834	antisense	TRUE
chr2	cg01809281	ENSG00000219626	rs10865254	FAM228B	-16.9818	3.05346	2.67475e-08	0.395441	protein_coding	TRUE
chr2	cg11040329	ENSG00000136718	rs3739123	IMP4	4.41099	0.65665	1.84988e-11	0.39391	protein_coding	TRUE
chr2	cg09509267	ENSG00000144407	rs11693993	PTH2R	-11.3256	2.27103	6.13284e-07	0.387502	protein_coding	TRUE
chr2	cg00052932	ENSG00000273240	rs4667296	RP11-455J20.3	-1.0502	0.182525	8.73007e-09	0.385739	antisense	TRUE
chr2	cg01280080	ENSG00000138363	rs16853834	ATIC	-5.84443	0.811315	5.86196e-13	0.38267	protein_coding	TRUE
chr2	cg03650730	ENSG00000115677	rs12624197	HDLBP	-21.764	3.57016	1.08706e-09	0.381251	protein_coding	TRUE
chr2	cg17186168	ENSG00000134324	rs56387825	LPIN1	43.2455	8.57495	4.57717e-07	0.37941	protein_coding	TRUE
chr2	cg10536976	ENSG00000234072	rs201920988	AC074117.10	30.489	5.9777	3.38815e-07	0.377969	antisense	TRUE
chr2	cg02756915	ENSG00000237940	rs6734937	AC093642.3	-2.31426	0.354685	6.80825e-11	0.365367	lincRNA	TRUE
chr2	cg15482884	ENSG00000221823	rs6731036	PPP3R1	19.8669	3.00923	4.05662e-11	0.362202	protein_coding	TRUE
chr2	cg07720865	ENSG00000135953	rs17027893	MFSD9	-2.4398	0.404807	1.66959e-09	0.354865	protein_coding	TRUE
chr2	cg23290912	ENSG00000237940	rs34381460	AC093642.3	-2.7905	0.533352	1.67682e-07	0.353433	lincRNA	TRUE
chr2	cg10052941	ENSG00000151693	rs6741045	ASAP2	-18.0422	3.22774	2.27412e-08	0.350954	protein_coding	TRUE
chr2	cg00335607	ENSG00000042304	rs6755748	C2orf83	-1.84684	0.245849	5.81914e-14	0.349516	protein_coding	TRUE
chr2	cg24695024	ENSG00000198648	rs11372724	STK39	-35.9424	5.03032	8.98986e-13	0.348253	protein_coding	TRUE
chr2	cg13827224	ENSG00000134324	rs3924929	LPIN1	-52.1062	10.2848	4.05551e-07	0.344527	protein_coding	TRUE
chr2	cg12620499	ENSG00000260804	rs7603645	PKI55	-11.7148	2.38474	8.99588e-07	0.341134	lincRNA	TRUE
chr2	cg00362816	ENSG00000237651	rs112583316	C2orf74	-19.4016	2.8738	1.46646e-11	0.340879	protein_coding	TRUE
chr2	cg16725050	ENSG00000127824	rs939574	TUBA4A	-12.1943	1.72698	1.65287e-12	0.336686	protein_coding	TRUE
chr2	cg03601877	ENSG00000144057	rs987987	ST6GAL2	-7.25126	1.47756	9.22066e-07	0.333898	protein_coding	TRUE
chr2	cg19506677	ENSG00000237940	rs28869868	AC093642.3	1.49898	0.272237	3.66746e-08	0.33386	lincRNA	TRUE
chr2	cg26847850	ENSG00000071967	rs72884306	CYBRD1	-112.137	22.6843	7.67907e-07	0.331027	protein_coding	TRUE
chr2	cg20563666	ENSG00000223658	rs12991195	C1GALT1C1L	-1.22239	0.236815	2.44619e-07	0.325608	protein_coding	TRUE
chr2	cg25618457	ENSG00000127838	rs3839052	PNKD	-1.75333	0.339084	2.33132e-07	0.325559	protein_coding	TRUE
chr2	cg08445696	ENSG00000170500	rs11895772	LONRF2	-77.6005	10.2741	4.25191e-14	0.324361	protein_coding	TRUE
chr2	cg23752985	ENSG00000115486	rs10187424	GGCX	21.1079	2.53995	9.54096e-17	0.324202	protein_coding	TRUE
chr2	cg16064292	ENSG00000152117	rs13382701	AC093838.4	-38.6197	4.70244	2.16289e-16	0.322646	transcribed_processed_pseudogene	TRUE
chr2	cg14958017	ENSG00000075292	rs12478953	ZNF638	36.8027	6.59717	2.42516e-08	0.313403	protein_coding	TRUE
chr2	cg12946832	ENSG00000138074	rs62130680	SLC5A6	-6.44419	1.18447	5.31156e-08	0.308275	protein_coding	TRUE
chr2	cg23122642	ENSG00000189223	rs7576384	PAX8-AS1	-29.5207	4.65642	2.30105e-10	0.307239	processed_transcript	TRUE
chr2	cg13886554	ENSG00000144152	rs6737707	FBLN7	-3.47788	0.55054	2.66307e-10	0.3031	protein_coding	TRUE
chr2	cg07063745	ENSG00000115365	rs3856343	LANCL1	13.6877	2.54816	7.80307e-08	0.301922	protein_coding	TRUE
chr2	cg02019574	ENSG00000170577	rs2944665	SIX2	7.59731	1.25659	1.48521e-09	0.294797	protein_coding	TRUE
chr2	cg04178439	ENSG00000138074	rs12475843	SLC5A6	-9.03877	1.72293	1.55289e-07	0.294183	protein_coding	TRUE
chr2	cg23064556	ENSG00000115041	rs2320621	KCNIP3	-1.31174	0.179937	3.09955e-13	0.294174	protein_coding	TRUE
chr2	cg21488538	ENSG00000222000	rs2292119	AC092675.3	-0.59732	0.11609	2.67058e-07	0.29254	antisense	TRUE
chr2	cg20019365	ENSG00000261338	rs11554825	RP11-378A13.1	2.45054	0.219648	6.6436e-29	0.289235	sense_overlapping	TRUE
chr2	cg24364398	ENSG00000132305	rs6725046	IMMT	-24.4042	4.18184	5.35481e-09	0.283439	protein_coding	TRUE
chr2	cg25027884	ENSG00000236209	rs2422090	AC104135.2	-2.51819	0.437586	8.67761e-09	0.283167	lincRNA	TRUE
chr2	cg14754761	ENSG00000180398	rs28770495	MCFD2	-87.1093	17.3666	5.27864e-07	0.282433	protein_coding	TRUE
chr2	cg18805606	ENSG00000138356	rs13031098	AOX1	3.51594	0.564531	4.722e-10	0.281637	protein_coding	TRUE
chr2	cg09592272	ENSG00000144182	rs35439305	LIPT1	6.24731	1.02422	1.06334e-09	0.277836	protein_coding	TRUE
chr2	cg06608945	ENSG00000163466	rs10206984	ARPC2	24.0358	2.57452	1e-20	0.277114	protein_coding	TRUE
chr2	cg08047252	ENSG00000151694	rs6747020	ADAM17	-29.9161	5.48082	4.80648e-08	0.275085	protein_coding	TRUE
chr2	cg06573604	ENSG00000054219	rs7599157	LY75	5.742	1.11553	2.64216e-07	0.273512	protein_coding	TRUE
chr2	cg25516222	ENSG00000124839	rs7585075	RAB17	44.1108	8.98188	9.05724e-07	0.271122	protein_coding	TRUE
chr2	cg16435511	ENSG00000132305	rs2241432	IMMT	21.8259	4.28448	3.50244e-07	0.26739	protein_coding	TRUE
chr2	cg05507490	ENSG00000237940	rs7603052	AC093642.3	1.47714	0.237436	4.93363e-10	0.266701	lincRNA	TRUE
chr2	cg27510048	ENSG00000064012	rs1035142	CASP8	20.7215	3.50338	3.32424e-09	0.265219	protein_coding	TRUE
chr2	cg08640923	ENSG00000127824	rs939574	TUBA4A	-4.25437	0.571611	9.85903e-14	0.261877	protein_coding	TRUE
chr2	cg00058708	ENSG00000219626	rs34666567	FAM228B	-20.5642	3.94364	1.84296e-07	0.257174	protein_coding	TRUE
chr2	cg07261828	ENSG00000115041	rs4283455	KCNIP3	1.70439	0.284078	1.97654e-09	0.256485	protein_coding	TRUE
chr2	cg01155138	ENSG00000068654	rs70953987	POLR1A	26.0098	4.79355	5.76304e-08	0.256396	protein_coding	TRUE
chr2	cg11676442	ENSG00000278962	rs4613287	RP11-399B17.1	-4.26143	0.795141	8.3529e-08	0.255521	TEC	TRUE
chr2	cg11775828	ENSG00000198648	rs7569501	STK39	-63.5825	10.4567	1.19748e-09	0.253315	protein_coding	TRUE
chr2	cg17185244	ENSG00000064012	rs34064194	CASP8	11.1854	2.19031	3.27712e-07	0.250901	protein_coding	TRUE
chr2	cg16812701	ENSG00000151694	rs12692387	ADAM17	-27.7763	3.79736	2.58075e-13	0.250605	protein_coding	TRUE
chr2	cg08560184	ENSG00000136717	rs749008	BIN1	-60.412	10.2758	4.12562e-09	0.249597	protein_coding	TRUE
chr2	cg22712983	ENSG00000261338	rs3839052	RP11-378A13.1	-2.83375	0.427838	3.51e-11	0.24541	sense_overlapping	TRUE
chr2	cg13173536	ENSG00000171853	rs7573231	TRAPPC12	-2.75517	0.443634	5.28316e-10	0.24512	protein_coding	TRUE
chr2	cg15356281	ENSG00000006607	rs3755397	FARP2	2.78673	0.523597	1.02476e-07	0.245106	protein_coding	TRUE
chr2	cg04069811	ENSG00000068615	rs79402359	REEP1	-27.4974	5.43137	4.13367e-07	0.244515	protein_coding	TRUE
chr2	cg13886554	ENSG00000278962	rs6737707	RP11-399B17.1	-2.9532	0.461622	1.58004e-10	0.243376	TEC	TRUE
chr2	cg16076328	ENSG00000119888	rs4952886	EPCAM	-5.56938	0.864409	1.17144e-10	0.242532	protein_coding	TRUE
chr2	cg17332091	ENSG00000233392	rs4407242	AC104809.4	-0.940099	0.187438	5.28912e-07	0.241117	processed_transcript	TRUE
chr2	cg10820936	ENSG00000118242	rs200857348	MREG	-20.8926	4.2557	9.13946e-07	0.235691	protein_coding	TRUE
chr2	cg19288921	ENSG00000237940	rs6761036	AC093642.3	-2.35202	0.312419	5.13534e-14	0.235274	lincRNA	TRUE
chr2	cg15058605	ENSG00000118263	rs60818447	KLF7	-5.93339	1.07113	3.03526e-08	0.235046	protein_coding	TRUE
chr2	cg00327537	ENSG00000163170	rs1667601	BOLA3	7.31278	1.17885	5.52827e-10	0.232839	protein_coding	TRUE
chr2	cg20303744	ENSG00000273240	rs9646811	RP11-455J20.3	-0.785293	0.122417	1.40912e-10	0.232259	antisense	TRUE
chr2	cg04170071	ENSG00000144134	rs9750212	RABL2A	-4.80189	0.943181	3.55871e-07	0.229978	protein_coding	TRUE
chr2	cg12059950	ENSG00000198648	rs6708854	STK39	-71.6411	9.76691	2.21579e-13	0.227735	protein_coding	TRUE
chr2	cg17257571	ENSG00000138376	rs1129804	BARD1	-11.1886	1.47103	2.82886e-14	0.225628	protein_coding	TRUE
chr2	cg09592903	ENSG00000115310	rs2588518	RTN4	-343.977	57.2679	1.89615e-09	0.224418	protein_coding	TRUE
chr2	cg22585786	ENSG00000198648	rs7569501	STK39	-52.0015	6.17982	3.93805e-17	0.224174	protein_coding	TRUE
chr2	cg09951666	ENSG00000079785	rs2302932	DDX1	-48.5713	9.73206	6.01132e-07	0.223028	protein_coding	TRUE
chr2	cg10820045	ENSG00000115524	rs2889363	SF3B1	-23.7353	4.81616	8.29614e-07	0.222953	protein_coding	TRUE
chr2	cg15496985	ENSG00000135951	rs7572660	TSGA10	10.6525	0.906608	7.07653e-32	0.222334	protein_coding	TRUE
chr2	cg04040637	ENSG00000237940	rs13018275	AC093642.3	-1.14501	0.220281	2.01497e-07	0.222018	lincRNA	TRUE
chr2	cg11691429	ENSG00000172554	rs62105720	SNTG2	-2.3853	0.485386	8.91355e-07	0.220131	protein_coding	TRUE
chr2	cg03701609	ENSG00000115020	rs11693993	PIKFYVE	-20.3807	3.75706	5.80713e-08	0.21914	protein_coding	TRUE
chr2	cg01808072	ENSG00000151694	rs10179780	ADAM17	-33.8541	5.36849	2.86191e-10	0.216839	protein_coding	TRUE
chr2	cg18054993	ENSG00000118242	rs200857348	MREG	-24.3164	4.87524	6.10913e-07	0.215757	protein_coding	TRUE
chr2	cg15482884	ENSG00000273275	rs6731036	RP11-474G23.2	-0.189998	0.0346185	4.05778e-08	0.214426	antisense	TRUE
chr2	cg00263240	ENSG00000180902	rs7582582	D2HGDH	0.951526	0.137787	4.99265e-12	0.214313	protein_coding	TRUE
chr2	cg09628356	ENSG00000168385	rs35249795	SEPTIN2	-76.56	12.1853	3.32106e-10	0.21079	protein_coding	TRUE
chr2	cg01017244	ENSG00000217702	rs111321297	RP11-287D1.4	3.60885	0.515651	2.58476e-12	0.208845	lincRNA	TRUE
chr2	cg25748441	ENSG00000064012	rs2349070	CASP8	-19.235	3.02725	2.09886e-10	0.208126	protein_coding	TRUE
chr2	cg01835656	ENSG00000115685	rs10933531	PPP1R7	-3.17089	0.53327	2.7458e-09	0.206908	protein_coding	TRUE
chr2	cg21542459	ENSG00000144182	rs5832868	LIPT1	1.30855	0.130038	8.06399e-24	0.206647	protein_coding	TRUE
chr2	cg05143735	ENSG00000236682	rs62156576	AC068282.3	12.9033	2.37365	5.44736e-08	0.205863	lincRNA	TRUE
chr2	cg20260610	ENSG00000257800	rs57529123	FNBP1P1	-3.15264	0.51953	1.29317e-09	0.204493	processed_pseudogene	TRUE
chr2	cg07592198	ENSG00000091409	rs9287954	ITGA6	-43.4548	3.81379	4.47372e-30	0.203619	protein_coding	TRUE
chr2	cg09390137	ENSG00000237940	rs6761036	AC093642.3	-2.10669	0.247144	1.53933e-17	0.202374	lincRNA	TRUE
chr2	cg04355829	ENSG00000152117	rs17855729	AC093838.4	-23.1319	2.23323	3.84802e-25	0.201637	transcribed_processed_pseudogene	TRUE
chr2	cg02611153	ENSG00000136717	rs35322174	BIN1	-51.9161	8.50923	1.05311e-09	0.201082	protein_coding	TRUE
chr2	cg08378442	ENSG00000127824	rs939574	TUBA4A	-11.4451	1.64555	3.52127e-12	0.20078	protein_coding	TRUE
chr2	cg15541040	ENSG00000171853	rs35880599	TRAPPC12	-2.15773	0.410943	1.51547e-07	0.200583	protein_coding	TRUE
chr2	cg24429037	ENSG00000237940	rs35512023	AC093642.3	-1.98218	0.342594	7.21601e-09	0.198898	lincRNA	TRUE
chr2	cg09855349	ENSG00000130414	rs6437237	NDUFA10	-33.9698	4.51574	5.37295e-14	0.195358	protein_coding	TRUE
chr2	cg12203072	ENSG00000237940	rs28869868	AC093642.3	2.21549	0.427488	2.18826e-07	0.193728	lincRNA	TRUE
chr2	cg05223591	ENSG00000154518	rs268172	ATP5G3	-55.8379	9.27349	1.73084e-09	0.193619	protein_coding	TRUE
chr2	cg11503661	ENSG00000237940	rs62193136	AC093642.3	3.25124	0.379643	1.09073e-17	0.193174	lincRNA	TRUE
chr2	cg21754534	ENSG00000259793	rs838714	RP11-400N9.1	-1.29724	0.25955	5.79179e-07	0.191683	antisense	TRUE
chr2	cg19455953	ENSG00000138400	rs12465959	MDH1B	16.6582	3.37016	7.69857e-07	0.185376	protein_coding	TRUE
chr2	cg08568260	ENSG00000198648	rs3769392	STK39	29.2781	3.79705	1.25071e-14	0.184371	protein_coding	TRUE
chr2	cg10623227	ENSG00000091409	rs58514604	ITGA6	-65.5857	7.38559	6.67245e-19	0.183775	protein_coding	TRUE
chr2	cg19026692	ENSG00000198648	rs11372724	STK39	-55.2992	8.11319	9.36315e-12	0.18346	protein_coding	TRUE
chr2	cg22939988	ENSG00000170500	rs7588623	LONRF2	-34.6455	6.22676	2.63699e-08	0.181942	protein_coding	TRUE
chr2	cg08541846	ENSG00000115350	rs12366	POLE4	11.4999	1.48516	9.6951e-15	0.18046	protein_coding	TRUE
chr2	cg10342813	ENSG00000151694	rs34268740	ADAM17	-35.3498	5.51597	1.46826e-10	0.178639	protein_coding	TRUE
chr2	cg12789435	ENSG00000143924	rs12467012	EML4	-17.2313	3.21859	8.61874e-08	0.177416	protein_coding	TRUE
chr2	cg23100626	ENSG00000174501	rs1168967	ANKRD36C	3.13764	0.514578	1.07745e-09	0.168644	protein_coding	TRUE
chr2	cg19584871	ENSG00000134324	rs79420947	LPIN1	39.7242	6.45558	7.58044e-10	0.168376	protein_coding	TRUE
chr2	cg03331300	ENSG00000198648	rs4668025	STK39	-26.0227	3.08807	3.55151e-17	0.167509	protein_coding	TRUE
chr2	cg03701609	ENSG00000144407	rs11693993	PTH2R	-12.2763	2.17947	1.77421e-08	0.166951	protein_coding	TRUE
chr2	cg11229343	ENSG00000237940	rs6710479	AC093642.3	0.796939	0.107999	1.59329e-13	0.166811	lincRNA	TRUE
chr2	cg05692746	ENSG00000170500	rs12621892	LONRF2	-35.5996	3.56269	1.64674e-23	0.165182	protein_coding	TRUE
chr2	cg17569203	ENSG00000236209	rs4330128	AC104135.2	-3.49523	0.618715	1.61227e-08	0.163971	lincRNA	TRUE
chr2	cg13818762	ENSG00000162992	rs62190049	NEUROD1	-71.7674	14.4318	6.59743e-07	0.162898	protein_coding	TRUE
chr2	cg18693308	ENSG00000144488	rs12479385	ESPNL	-1.80827	0.364979	7.25361e-07	0.162836	protein_coding	TRUE
chr2	cg05991902	ENSG00000151693	rs34254156	ASAP2	-22.4504	4.48145	5.45325e-07	0.161988	protein_coding	TRUE
chr2	cg10809134	ENSG00000180398	rs13423962	MCFD2	94.6116	19.004	6.40717e-07	0.160746	protein_coding	TRUE
chr2	cg07698784	ENSG00000233392	rs4407242	AC104809.4	-0.710377	0.133498	1.03055e-07	0.159327	processed_transcript	TRUE
chr2	cg03728395	ENSG00000152291	rs10460587	TGOLN2	11.5964	2.08143	2.52767e-08	0.157605	protein_coding	TRUE
chr2	cg03646261	ENSG00000170577	rs2944665	SIX2	-8.98039	1.60432	2.17305e-08	0.156508	protein_coding	TRUE
chr2	cg26009582	ENSG00000118242	rs200857348	MREG	-20.2286	3.88698	1.94842e-07	0.155454	protein_coding	TRUE
chr2	cg05349725	ENSG00000144028	rs2276649	SNRNP200	-109.519	19.7752	3.05615e-08	0.154086	protein_coding	TRUE
chr2	cg01736212	ENSG00000168958	rs6738078	MFF	-9.44584	1.70067	2.78886e-08	0.152555	protein_coding	TRUE
chr2	cg00498211	ENSG00000115902	rs68181270	SLC1A4	-23.3857	4.48064	1.79633e-07	0.152362	protein_coding	TRUE
chr2	cg12500731	ENSG00000237940	rs7603052	AC093642.3	-1.53366	0.291513	1.43238e-07	0.152117	lincRNA	TRUE
chr2	cg21399778	ENSG00000115685	rs2190656	PPP1R7	-3.92989	0.669585	4.38075e-09	0.150733	protein_coding	TRUE
chr2	cg12784422	ENSG00000151694	rs6432013	ADAM17	-37.9328	5.20855	3.26991e-13	0.150724	protein_coding	TRUE
chr2	cg26845390	ENSG00000237940	rs7603052	AC093642.3	-1.33624	0.24227	3.47823e-08	0.148985	lincRNA	TRUE
chr2	cg09295081	ENSG00000134324	rs58026116	LPIN1	12.6152	2.00496	3.13431e-10	0.148494	protein_coding	TRUE
chr2	cg00004454	ENSG00000233392	rs4407242	AC104809.4	-0.547825	0.0977265	2.07419e-08	0.146212	processed_transcript	TRUE
chr2	cg15126615	ENSG00000236209	rs7586613	AC104135.2	-1.8219	0.26198	3.54266e-12	0.145178	lincRNA	TRUE
chr2	cg06643318	ENSG00000144028	rs113914476	SNRNP200	72.4615	13.8589	1.70894e-07	0.144367	protein_coding	TRUE
chr2	cg16599744	ENSG00000237940	rs113052758	AC093642.3	-1.87244	0.217716	7.94489e-18	0.142181	lincRNA	TRUE
chr2	cg21471272	ENSG00000151694	rs111759422	ADAM17	-30.1816	4.13022	2.72158e-13	0.14069	protein_coding	TRUE
chr2	cg19151604	ENSG00000237940	rs35512023	AC093642.3	-2.62621	0.455459	8.1136e-09	0.140686	lincRNA	TRUE
chr2	cg23655155	ENSG00000132313	rs2278084	MRPL35	-5.10819	0.962148	1.10134e-07	0.140431	protein_coding	TRUE
chr2	cg07992385	ENSG00000198648	rs2063962	STK39	-72.1237	9.75571	1.43576e-13	0.138429	protein_coding	TRUE
chr2	cg18400331	ENSG00000115364	rs13419624	MRPL19	5.41421	1.03474	1.67311e-07	0.13842	protein_coding	TRUE
chr2	cg22712983	ENSG00000163466	rs3839052	ARPC2	-16.896	2.76097	9.38122e-10	0.138404	protein_coding	TRUE
chr2	cg17510733	ENSG00000143924	rs77579563	EML4	9.01368	1.43744	3.59567e-10	0.137679	protein_coding	TRUE
chr2	cg11348442	ENSG00000127824	rs939574	TUBA4A	-7.25768	1.04887	4.53063e-12	0.132376	protein_coding	TRUE
chr2	cg02669268	ENSG00000115020	rs6725418	PIKFYVE	-14.5504	2.86496	3.7993e-07	0.132122	protein_coding	TRUE
chr2	cg13789186	ENSG00000144182	rs11123761	LIPT1	6.93908	0.802587	5.33872e-18	0.129079	protein_coding	TRUE
chr2	cg23069297	ENSG00000237940	rs62193136	AC093642.3	-1.48395	0.210794	1.92448e-12	0.128508	lincRNA	TRUE
chr2	cg18737356	ENSG00000170500	rs10658854	LONRF2	-28.9397	2.82496	1.25542e-24	0.127765	protein_coding	TRUE
chr2	cg01839430	ENSG00000138363	rs35280333	ATIC	-9.94151	1.73082	9.25599e-09	0.127159	protein_coding	TRUE
chr2	cg05507490	ENSG00000280119	rs7603052	AC093642.1	2.06554	0.340293	1.27986e-09	0.126425	TEC	TRUE
chr2	cg02706766	ENSG00000118242	rs200857348	MREG	-16.5018	3.19947	2.50069e-07	0.1262	protein_coding	TRUE
chr2	cg23762263	ENSG00000144278	rs10221630	GALNT13	-6.63969	1.1408	5.87757e-09	0.125627	protein_coding	TRUE
chr2	cg18095041	ENSG00000237940	rs35512023	AC093642.3	-2.69677	0.514076	1.55556e-07	0.124548	lincRNA	TRUE
chr2	cg01295084	ENSG00000115423	rs7575751	DNAH6	-13.5777	2.46573	3.65905e-08	0.123724	protein_coding	TRUE
chr2	cg17974684	ENSG00000075292	rs13032033	ZNF638	34.5715	6.91399	5.72634e-07	0.123485	protein_coding	TRUE
chr2	cg04299003	ENSG00000091409	rs13414928	ITGA6	-44.0645	4.49332	1.05389e-22	0.123463	protein_coding	TRUE
chr2	cg09745087	ENSG00000144152	rs6716528	FBLN7	-2.39334	0.458893	1.83366e-07	0.12259	protein_coding	TRUE
chr2	cg23677712	ENSG00000151694	rs6432015	ADAM17	-49.3805	7.29092	1.26252e-11	0.122322	protein_coding	TRUE
chr2	cg06024411	ENSG00000278962	rs34297045	RP11-399B17.1	-3.16232	0.578201	4.51956e-08	0.119661	TEC	TRUE
chr2	cg09919917	ENSG00000280119	rs13018275	AC093642.1	-2.12792	0.361578	3.97823e-09	0.117265	TEC	TRUE
chr2	cg08493051	ENSG00000171853	rs35880599	TRAPPC12	-4.03409	0.769287	1.57195e-07	0.115845	protein_coding	TRUE
chr2	cg25027884	ENSG00000115350	rs2422090	POLE4	16.5963	3.28392	4.33086e-07	0.115513	protein_coding	TRUE
chr2	cg23692114	ENSG00000115350	rs7586613	POLE4	8.37662	1.29198	8.95899e-11	0.11462	protein_coding	TRUE
chr2	cg15126615	ENSG00000115350	rs7586613	POLE4	11.4554	1.95462	4.60945e-09	0.113634	protein_coding	TRUE
chr2	cg12909060	ENSG00000135951	rs12999417	TSGA10	-23.1779	4.08603	1.40744e-08	0.113042	protein_coding	TRUE
chr2	cg24429037	ENSG00000280119	rs35512023	AC093642.1	-2.19784	0.428301	2.87394e-07	0.111406	TEC	TRUE
chr2	cg16965027	ENSG00000075292	rs12478953	ZNF638	29.0184	5.35644	6.04437e-08	0.110958	protein_coding	TRUE
chr2	cg11706790	ENSG00000237940	rs34381460	AC093642.3	-1.78199	0.284556	3.79247e-10	0.110638	lincRNA	TRUE
chr2	cg03532030	ENSG00000237940	rs7603052	AC093642.3	-1.49911	0.30016	5.90247e-07	0.110574	lincRNA	TRUE
chr2	cg17916490	ENSG00000134324	rs11893735	LPIN1	11.4357	1.88376	1.27346e-09	0.105788	protein_coding	TRUE
chr2	cg00672622	ENSG00000075292	rs6725697	ZNF638	19.936	3.42331	5.75947e-09	0.105701	protein_coding	TRUE
chr2	cg10397934	ENSG00000224272	rs6734937	AC114730.3	-4.2481	0.827182	2.81208e-07	0.104842	antisense	TRUE
chr2	cg09747827	ENSG00000236682	rs2069933	AC068282.3	13.799	2.45766	1.96919e-08	0.102366	lincRNA	TRUE
chr2	cg11706790	ENSG00000280119	rs34381460	AC093642.1	-2.02057	0.364148	2.87701e-08	0.0979437	TEC	TRUE
chr2	cg20019365	ENSG00000163466	rs11554825	ARPC2	15.0529	1.55543	3.75192e-22	0.0969086	protein_coding	TRUE
chr2	cg27010375	ENSG00000132305	rs1010239	IMMT	16.1601	2.72705	3.10691e-09	0.0965354	protein_coding	TRUE
chr2	cg03210866	ENSG00000119888	rs112628241	EPCAM	-6.36687	1.08742	4.76945e-09	0.096208	protein_coding	TRUE
chr2	cg15496985	ENSG00000144182	rs7572660	LIPT1	3.57129	0.352848	4.44339e-24	0.0943085	protein_coding	TRUE
chr2	cg03650730	ENSG00000168385	rs12624197	SEPTIN2	34.999	6.34983	3.55198e-08	0.0930661	protein_coding	TRUE
chr2	cg21747090	ENSG00000115241	rs13472	PPM1G	-7.07467	1.14058	5.55122e-10	0.0912963	protein_coding	TRUE
chr2	cg09738100	ENSG00000135972	rs10207988	MRPS9	25.1783	3.65766	5.83096e-12	0.0906676	protein_coding	TRUE
chr2	cg07301105	ENSG00000283312	rs28578546	RP11-562I5.1	-3.7379	0.744064	5.07037e-07	0.0906333	processed_pseudogene	TRUE
chr2	cg02756915	ENSG00000224272	rs6734937	AC114730.3	-2.60607	0.446249	5.22144e-09	0.0902764	antisense	TRUE
chr2	cg08017756	ENSG00000170500	rs12621892	LONRF2	-31.0742	2.94469	4.93903e-26	0.0862949	protein_coding	TRUE
chr2	cg09321363	ENSG00000115423	rs7561462	DNAH6	-9.83037	1.20536	3.47535e-16	0.0861096	protein_coding	TRUE
chr2	cg06024411	ENSG00000144152	rs34297045	FBLN7	-3.35838	0.652911	2.69371e-07	0.0845966	protein_coding	TRUE
chr2	cg16570455	ENSG00000115350	rs13013787	POLE4	11.3283	1.73776	7.08232e-11	0.0822398	protein_coding	TRUE
chr2	cg12763660	ENSG00000068654	rs4832257	POLR1A	18.0009	3.1641	1.27703e-08	0.0799009	protein_coding	TRUE
chr2	cg06564827	ENSG00000134324	rs11884930	LPIN1	-40.5761	7.30704	2.8079e-08	0.0795693	protein_coding	TRUE
chr2	cg10317387	ENSG00000144115	rs10865489	THNSL2	-83.7858	16.7838	5.97383e-07	0.0795552	protein_coding	TRUE
chr2	cg00981060	ENSG00000095002	rs13031209	MSH2	30.8893	5.10892	1.48348e-09	0.0741062	protein_coding	TRUE
chr2	cg01242772	ENSG00000134324	rs58026116	LPIN1	-24.0904	3.54826	1.1264e-11	0.0736851	protein_coding	TRUE
chr2	cg19506677	ENSG00000224272	rs28869868	AC114730.3	1.78586	0.358754	6.42581e-07	0.0714653	antisense	TRUE
chr2	cg09919917	ENSG00000237940	rs13018275	AC093642.3	-1.66401	0.259394	1.40829e-10	0.0712766	lincRNA	TRUE
chr2	cg19151604	ENSG00000280119	rs35512023	AC093642.1	-2.91194	0.568988	3.09208e-07	0.0712625	TEC	TRUE
chr2	cg18975177	ENSG00000237651	rs55705084	C2orf74	-11.2185	2.13381	1.46039e-07	0.0706804	protein_coding	TRUE
chr2	cg00570673	ENSG00000128699	rs11685425	ORMDL1	64.0043	9.60784	2.70716e-11	0.0704174	protein_coding	TRUE
chr2	cg20158317	ENSG00000173209	rs3821224	AHSA2	52.0143	8.56028	1.23036e-09	0.0681919	protein_coding	TRUE
chr2	cg23100626	ENSG00000232931	rs1168967	LINC00342	4.05344	0.755375	8.04467e-08	0.0680021	lincRNA	TRUE
chr2	cg25657834	ENSG00000134324	rs4640359	LPIN1	24.8512	3.80989	6.90097e-11	0.0675092	protein_coding	TRUE
chr2	cg20091297	ENSG00000115816	rs3770754	CEBPZ	-4.64546	0.938624	7.4511e-07	0.0670052	protein_coding	TRUE
chr2	cg25913016	ENSG00000064012	rs59674665	CASP8	7.35975	1.32325	2.66901e-08	0.0665602	protein_coding	TRUE
chr2	cg20560298	ENSG00000163016	rs6748040	ALMS1P1	-4.22388	0.565708	8.23329e-14	0.0664097	transcribed_unprocessed_pseudogene	TRUE
chr2	cg23923311	ENSG00000280119	rs35512023	AC093642.1	-2.10314	0.34012	6.26794e-10	0.0662887	TEC	TRUE
chr2	cg09704217	ENSG00000138030	rs111723669	KHK	-1.9248	0.387569	6.82229e-07	0.0655449	protein_coding	TRUE
chr2	cg14652038	ENSG00000116106	rs3770146	EPHA4	-34.6919	4.93753	2.123e-12	0.0649605	protein_coding	TRUE
chr2	cg20416129	ENSG00000170577	rs985594	SIX2	-3.43126	0.642259	9.16846e-08	0.0648751	protein_coding	TRUE
chr2	cg24715680	ENSG00000138376	rs717548	BARD1	11.5654	2.20614	1.58521e-07	0.0646086	protein_coding	TRUE
chr2	cg19411094	ENSG00000236682	rs885276	AC068282.3	-9.23922	1.88329	9.30021e-07	0.064228	lincRNA	TRUE
chr2	cg26150922	ENSG00000170500	rs4851296	LONRF2	-33.8628	3.39638	2.05674e-23	0.0637431	protein_coding	TRUE
chr2	cg03173936	ENSG00000144057	rs1524293	ST6GAL2	7.45995	0.936862	1.68328e-15	0.0630442	protein_coding	TRUE
chr2	cg02226385	ENSG00000168385	rs10205490	SEPTIN2	-46.6959	8.38691	2.58115e-08	0.0623514	protein_coding	TRUE
chr2	cg15496985	ENSG00000273045	rs7572660	C2orf15	0.734699	0.149517	8.93178e-07	0.0618316	protein_coding	TRUE
chr2	cg24715680	ENSG00000229267	rs60617579	AC072062.1	-1.60079	0.250705	1.71212e-10	0.0599481	antisense	TRUE
chr2	cg20091297	ENSG00000115825	rs3770754	PRKD3	-22.0659	3.90292	1.57039e-08	0.0593208	protein_coding	TRUE
chr2	cg00052932	ENSG00000138381	rs4667296	ASNSD1	-49.4523	6.38916	9.93896e-15	0.0589636	protein_coding	TRUE
chr2	cg00012203	ENSG00000261338	rs10206984	RP11-378A13.1	3.36216	0.404072	8.74428e-17	0.0585027	sense_overlapping	TRUE
chr2	cg15219523	ENSG00000115020	rs73070962	PIKFYVE	-20.212	3.87939	1.88737e-07	0.0571013	protein_coding	TRUE
chr2	cg01158574	ENSG00000134324	rs75350264	LPIN1	17.3911	2.45225	1.32275e-12	0.056811	protein_coding	TRUE
chr2	cg26665480	ENSG00000196912	rs34288415	ANKRD36B	-4.27785	0.545121	4.2432e-15	0.0565133	protein_coding	TRUE
chr2	cg19641384	ENSG00000064012	rs4616462	CASP8	-10.8164	2.0855	2.14298e-07	0.0551028	protein_coding	TRUE
chr2	cg10293909	ENSG00000115350	rs12366	POLE4	3.28136	0.380995	7.14265e-18	0.0550859	protein_coding	TRUE
chr2	cg03532030	ENSG00000280119	rs7603052	AC093642.1	-2.09627	0.426498	8.87465e-07	0.0550476	TEC	TRUE
chr2	cg16297948	ENSG00000181798	rs2916579	LINC00471	0.769667	0.151524	3.78443e-07	0.0548025	lincRNA	TRUE
chr2	cg04253876	ENSG00000213626	rs9798481	LBH	-124.287	17.0562	3.17206e-13	0.0542248	protein_coding	TRUE
chr2	cg08051321	ENSG00000081479	rs36016897	LRP2	-369.788	63.5667	5.98008e-09	0.0539954	protein_coding	TRUE
chr2	cg22972126	ENSG00000240356	rs10209098	RPL23AP7	3.36483	0.550807	1.00313e-09	0.0529694	transcribed_processed_pseudogene	TRUE
chr2	cg00189101	ENSG00000115687	rs139092072	PASK	-39.465	7.01252	1.82541e-08	0.0513857	protein_coding	TRUE
chr3	cg06079062	ENSG00000138472	rs921174	GUCA1C	-79.8909	15.376	2.03816e-07	0.994273	protein_coding	TRUE
chr3	cg06820102	ENSG00000177311	rs1344672	ZBTB38	-13.687	2.29378	2.41603e-09	0.994203	protein_coding	TRUE
chr3	cg11946769	ENSG00000172113	rs4404473	NME6	-1.89894	0.294674	1.16207e-10	0.988058	protein_coding	TRUE
chr3	cg12435725	ENSG00000168297	rs35542947	PXK	-11.3299	1.99522	1.35873e-08	0.975332	protein_coding	TRUE
chr3	cg23826608	ENSG00000251576	rs1865884	LINC01267	-3.27048	0.476592	6.7802e-12	0.973322	lincRNA	TRUE
chr3	cg20085261	ENSG00000004534	rs139738301	RBM6	-131.93	16.3616	7.42085e-16	0.971851	protein_coding	TRUE
chr3	cg15877314	ENSG00000003756	rs77815052	RBM5	-108.658	21.3285	3.49644e-07	0.970097	protein_coding	TRUE
chr3	cg26343910	ENSG00000004534	rs139738301	RBM6	-168.62	31.03	5.5079e-08	0.96358	protein_coding	TRUE
chr3	cg00223877	ENSG00000163931	rs12630183	TKT	31.3858	5.65288	2.82132e-08	0.95847	protein_coding	TRUE
chr3	cg24964915	ENSG00000119227	rs4916593	PIGZ	-6.76384	0.830382	3.77857e-16	0.956397	protein_coding	TRUE
chr3	cg06981309	ENSG00000114698	rs76774339	PLSCR4	-11.1485	2.0338	4.21541e-08	0.953574	protein_coding	TRUE
chr3	cg03155027	ENSG00000164076	rs6797500	CAMKV	-81.6235	16.5869	8.61172e-07	0.952722	protein_coding	TRUE
chr3	cg25301180	ENSG00000187672	rs1491164	ERC2	10.791	1.66201	8.42958e-11	0.949926	protein_coding	TRUE
chr3	cg01475735	ENSG00000223797	rs12630072	ENTPD3-AS1	-3.74658	0.581725	1.1911e-10	0.949846	antisense	TRUE
chr3	cg02870266	ENSG00000255021	rs7610197	RP11-536I6.2	-31.2911	6.3692	8.97495e-07	0.948497	lincRNA	TRUE
chr3	cg03848978	ENSG00000177311	rs1344672	ZBTB38	-19.9222	3.23146	7.04472e-10	0.944943	protein_coding	TRUE
chr3	cg11134956	ENSG00000196220	rs813606	SRGAP3	-28.2829	5.48597	2.52955e-07	0.937161	protein_coding	TRUE
chr3	cg13683864	ENSG00000223797	rs60554147	ENTPD3-AS1	-1.08976	0.149584	3.21045e-13	0.93473	antisense	TRUE
chr3	cg02860240	ENSG00000269984	rs9878797	RP11-362K14.5	-1.78503	0.306272	5.60151e-09	0.927779	antisense	TRUE
chr3	cg10394922	ENSG00000177311	rs1344672	ZBTB38	-33.2205	6.05909	4.18778e-08	0.921092	protein_coding	TRUE
chr3	cg20085261	ENSG00000003756	rs139738301	RBM5	-99.8633	15.5362	1.2948e-10	0.920886	protein_coding	TRUE
chr3	cg23444468	ENSG00000187672	rs9856358	ERC2	3.11581	0.414222	5.39088e-14	0.918166	protein_coding	TRUE
chr3	cg03993970	ENSG00000170248	rs9843488	PDCD6IP	-103.751	19.735	1.46279e-07	0.912091	protein_coding	TRUE
chr3	cg14732969	ENSG00000080200	rs9877544	CRYBG3	31.0581	5.57036	2.46668e-08	0.90517	protein_coding	TRUE
chr3	cg14994183	ENSG00000157152	rs2600268	SYN2	23.5014	4.19121	2.05509e-08	0.903605	protein_coding	TRUE
chr3	cg00721951	ENSG00000004534	rs35383235	RBM6	-148.524	29.3741	4.27503e-07	0.900491	protein_coding	TRUE
chr3	cg05576949	ENSG00000073792	rs6801848	IGF2BP2	-33.6136	6.55565	2.93738e-07	0.89845	protein_coding	TRUE
chr3	cg24308560	ENSG00000003756	rs9815930	RBM5	-112.246	18.7586	2.18094e-09	0.883841	protein_coding	TRUE
chr3	cg26465662	ENSG00000271976	rs9880056	RP11-884K10.7	-1.91235	0.338895	1.67212e-08	0.879769	antisense	TRUE
chr3	cg08193579	ENSG00000269984	rs9878797	RP11-362K14.5	-1.44623	0.189127	2.05877e-14	0.878011	antisense	TRUE
chr3	cg10071305	ENSG00000004534	rs139738301	RBM6	-49.5344	4.77744	3.45255e-25	0.876289	protein_coding	TRUE
chr3	cg25493589	ENSG00000157093	rs247420	LYZL4	1.81338	0.309083	4.4384e-09	0.874687	protein_coding	TRUE
chr3	cg04352534	ENSG00000177311	rs13077048	ZBTB38	-10.8238	1.60344	1.47526e-11	0.87394	protein_coding	TRUE
chr3	cg15452985	ENSG00000136068	rs183853	FLNB	-25.5003	3.86083	3.97847e-11	0.87288	protein_coding	TRUE
chr3	cg11421029	ENSG00000177311	rs13077048	ZBTB38	-13.5652	2.07777	6.63214e-11	0.870668	protein_coding	TRUE
chr3	cg23983435	ENSG00000157093	rs42777	LYZL4	1.53145	0.250473	9.70193e-10	0.870259	protein_coding	TRUE
chr3	cg10071305	ENSG00000003756	rs139738301	RBM5	-37.4947	5.0479	1.10438e-13	0.861104	protein_coding	TRUE
chr3	cg18473544	ENSG00000251576	rs1865884	LINC01267	-4.55911	0.854614	9.57003e-08	0.859972	lincRNA	TRUE
chr3	cg05573699	ENSG00000163938	rs10933	GNL3	-16.2928	3.27418	6.48647e-07	0.851801	protein_coding	TRUE
chr3	cg14226182	ENSG00000079257	rs6785658	LXN	2.59841	0.361923	6.99976e-13	0.848512	protein_coding	TRUE
chr3	cg09455208	ENSG00000223797	rs34796686	ENTPD3-AS1	2.06376	0.353901	5.49395e-09	0.837271	antisense	TRUE
chr3	cg13286620	ENSG00000154781	rs2053017	CCDC174	-5.66426	0.887343	1.73206e-10	0.835067	protein_coding	TRUE
chr3	cg02102424	ENSG00000157152	rs143095555	SYN2	-28.9411	4.80488	1.70922e-09	0.834292	protein_coding	TRUE
chr3	cg27294008	ENSG00000114904	rs11337750	NEK4	-13.7567	2.29079	1.91093e-09	0.831895	protein_coding	TRUE
chr3	cg19812613	ENSG00000138472	rs921174	GUCA1C	-32.8341	5.10565	1.2683e-10	0.831607	protein_coding	TRUE
chr3	cg08489410	ENSG00000231177	rs35681	LINC00852	1.2721	0.25822	8.37573e-07	0.820236	antisense	TRUE
chr3	cg01228342	ENSG00000170837	rs935545	GPR27	1.44694	0.292711	7.68298e-07	0.817477	protein_coding	TRUE
chr3	cg04439720	ENSG00000153560	rs59612868	UBP1	-23.1732	3.59466	1.14419e-10	0.814961	protein_coding	TRUE
chr3	cg00149659	ENSG00000254999	rs141185000	BRK1	-5.87255	1.09464	8.1031e-08	0.809739	protein_coding	TRUE
chr3	cg09771827	ENSG00000113838	rs13326516	TBCCD1	1.78831	0.350097	3.25546e-07	0.797487	protein_coding	TRUE
chr3	cg16997058	ENSG00000079257	rs56093991	LXN	0.907039	0.127613	1.17981e-12	0.786281	protein_coding	TRUE
chr3	cg16049219	ENSG00000163870	rs2720269	TPRA1	-1.68283	0.286865	4.45707e-09	0.782518	protein_coding	TRUE
chr3	cg13047869	ENSG00000163703	rs6768102	CRELD1	5.83272	1.15801	4.73253e-07	0.77762	protein_coding	TRUE
chr3	cg26432171	ENSG00000132155	rs35750419	RAF1	46.0226	6.17557	9.1679e-14	0.777119	protein_coding	TRUE
chr3	cg24332767	ENSG00000187068	rs6444035	C3orf70	-11.0541	2.05938	7.97611e-08	0.773032	protein_coding	TRUE
chr3	cg08113027	ENSG00000241570	rs669354	PAQR9-AS1	-8.75929	1.49285	4.42422e-09	0.766353	antisense	TRUE
chr3	cg15877314	ENSG00000004534	rs77815052	RBM6	-143.146	24.5831	5.78214e-09	0.762556	protein_coding	TRUE
chr3	cg26897744	ENSG00000079257	rs11436468	LXN	2.47889	0.322382	1.47932e-14	0.758559	protein_coding	TRUE
chr3	cg07693931	ENSG00000079257	rs6785658	LXN	1.69947	0.212768	1.37804e-15	0.756645	protein_coding	TRUE
chr3	cg07672748	ENSG00000073792	rs11711477	IGF2BP2	-38.0914	6.82382	2.376e-08	0.756366	protein_coding	TRUE
chr3	cg02860240	ENSG00000171757	rs9878797	LRRC34	-9.49094	1.57152	1.54733e-09	0.755279	protein_coding	TRUE
chr3	cg21716282	ENSG00000187715	rs1014470	KBTBD12	-4.76358	0.888362	8.22134e-08	0.750433	protein_coding	TRUE
chr3	cg17054900	ENSG00000174953	rs2971446	DHX36	-15.01	2.53298	3.10694e-09	0.743062	protein_coding	TRUE
chr3	cg01006103	ENSG00000144559	rs11353823	TAMM41	-6.56507	0.982491	2.35594e-11	0.741912	protein_coding	TRUE
chr3	cg24925929	ENSG00000082684	rs11923426	SEMA5B	-9.38943	1.68199	2.37325e-08	0.740827	protein_coding	TRUE
chr3	cg26129759	ENSG00000271976	rs999515	RP11-884K10.7	-0.547149	0.0965762	1.46633e-08	0.73061	antisense	TRUE
chr3	cg03269060	ENSG00000168827	rs56093991	GFM1	-32.6381	4.74646	6.14275e-12	0.720246	protein_coding	TRUE
chr3	cg00031303	ENSG00000260261	rs199712903	RP11-480A16.1	-7.89987	1.31296	1.77871e-09	0.719667	lincRNA	TRUE
chr3	cg00729894	ENSG00000082684	rs11923426	SEMA5B	-7.46697	1.29953	9.14343e-09	0.713065	protein_coding	TRUE
chr3	cg05558457	ENSG00000114904	rs12632265	NEK4	-15.4087	2.03233	3.40797e-14	0.712388	protein_coding	TRUE
chr3	cg08113027	ENSG00000188582	rs669354	PAQR9	-4.35776	0.828341	1.43413e-07	0.711695	protein_coding	TRUE
chr3	cg18487916	ENSG00000114904	rs12486554	NEK4	-19.8986	3.36827	3.46991e-09	0.711355	protein_coding	TRUE
chr3	cg02936049	ENSG00000177311	rs1344672	ZBTB38	-14.6166	2.30452	2.25945e-10	0.709756	protein_coding	TRUE
chr3	cg03957845	ENSG00000157093	rs33519	LYZL4	2.13556	0.430005	6.82181e-07	0.708113	protein_coding	TRUE
chr3	cg15407766	ENSG00000180370	rs1718406	PAK2	7.41763	1.2867	8.17391e-09	0.704421	protein_coding	TRUE
chr3	cg24308560	ENSG00000004534	rs9815930	RBM6	-144.939	20.2315	7.83352e-13	0.700679	protein_coding	TRUE
chr3	cg26465662	ENSG00000113812	rs9880056	ACTR8	-9.43508	1.10254	1.15272e-17	0.699394	protein_coding	TRUE
chr3	cg22029806	ENSG00000279277	rs17231503	RP11-861A13.3	-4.79195	0.591782	5.61013e-16	0.699274	TEC	TRUE
chr3	cg04646219	ENSG00000179097	rs1873210	HTR1F	-2.58268	0.374917	5.63129e-12	0.693838	protein_coding	TRUE
chr3	cg10697290	ENSG00000113811	rs2083127	SELK	-50.531	10.1876	7.04684e-07	0.693683	protein_coding	TRUE
chr3	cg19793404	ENSG00000179097	rs1873210	HTR1F	-3.22974	0.469488	6.01547e-12	0.687929	protein_coding	TRUE
chr3	cg18697348	ENSG00000271976	rs999515	RP11-884K10.7	-0.471627	0.080223	4.12882e-09	0.672401	antisense	TRUE
chr3	cg18194850	ENSG00000241316	rs13065696	SUCLG2-AS1	0.761648	0.100626	3.7579e-14	0.665072	lincRNA	TRUE
chr3	cg22029806	ENSG00000114446	rs17231503	IFT57	8.63911	1.19658	5.20585e-13	0.663779	protein_coding	TRUE
chr3	cg13860869	ENSG00000254999	rs1552244	BRK1	-3.26908	0.640213	3.2865e-07	0.660962	protein_coding	TRUE
chr3	cg19141448	ENSG00000082684	rs2276782	SEMA5B	-14.8276	2.89297	2.96958e-07	0.660248	protein_coding	TRUE
chr3	cg25516803	ENSG00000114812	rs42777	VIPR1	4.21945	0.817504	2.45135e-07	0.651419	protein_coding	TRUE
chr3	cg16706546	ENSG00000073792	rs5855073	IGF2BP2	-23.1826	3.28182	1.61838e-12	0.651169	protein_coding	TRUE
chr3	cg09010134	ENSG00000172113	rs9830016	NME6	2.53829	0.430515	3.72565e-09	0.650898	protein_coding	TRUE
chr3	cg12941369	ENSG00000170248	rs200198244	PDCD6IP	91.5962	17.7936	2.63684e-07	0.648909	protein_coding	TRUE
chr3	cg02089916	ENSG00000145087	rs10548211	STXBP5L	-10.2381	1.5668	6.38583e-11	0.644419	protein_coding	TRUE
chr3	cg01571842	ENSG00000136068	rs183853	FLNB	-43.7384	8.74219	5.64043e-07	0.641418	protein_coding	TRUE
chr3	cg18495847	ENSG00000073792	rs35430985	IGF2BP2	-16.7778	2.2836	2.02527e-13	0.638968	protein_coding	TRUE
chr3	cg00468631	ENSG00000119227	rs11295143	PIGZ	-6.20547	0.890411	3.187e-12	0.638819	protein_coding	TRUE
chr3	cg25441467	ENSG00000251474	rs58508862	RPL32P3	9.53449	1.80942	1.36908e-07	0.636763	transcribed_unprocessed_pseudogene	TRUE
chr3	cg19186409	ENSG00000114646	rs11330263	CSPG5	20.6455	3.88751	1.09196e-07	0.634079	protein_coding	TRUE
chr3	cg06362328	ENSG00000003756	rs139738301	RBM5	-70.8067	10.5957	2.34785e-11	0.628299	protein_coding	TRUE
chr3	cg11383981	ENSG00000144771	rs1878110	LRTM1	59.5694	12.0448	7.5895e-07	0.626367	protein_coding	TRUE
chr3	cg21681168	ENSG00000157093	rs13054	LYZL4	2.05634	0.415394	7.40901e-07	0.623925	protein_coding	TRUE
chr3	cg07647691	ENSG00000152492	rs12635242	CCDC50	-9.44866	1.66593	1.41376e-08	0.614208	protein_coding	TRUE
chr3	cg13189235	ENSG00000079257	rs6785658	LXN	1.52996	0.207997	1.89927e-13	0.609834	protein_coding	TRUE
chr3	cg18685394	ENSG00000157093	rs40415	LYZL4	-0.702352	0.081915	9.98177e-18	0.605214	protein_coding	TRUE
chr3	cg09354317	ENSG00000163938	rs2276823	GNL3	-8.36149	1.357	7.19397e-10	0.603767	protein_coding	TRUE
chr3	cg21380154	ENSG00000177311	rs1344672	ZBTB38	-16.9258	2.65136	1.72734e-10	0.603143	protein_coding	TRUE
chr3	cg08489410	ENSG00000240288	rs35681	GHRLOS	2.35036	0.458614	2.97656e-07	0.600342	antisense	TRUE
chr3	cg13526981	ENSG00000214135	rs149794556	AC024560.3	36.9505	7.3348	4.71145e-07	0.596871	transcribed_unprocessed_pseudogene	TRUE
chr3	cg02395479	ENSG00000163933	rs2581782	RFT1	-3.27826	0.284369	9.51568e-31	0.593209	protein_coding	TRUE
chr3	cg11002923	ENSG00000173421	rs6790914	CCDC36	-1.43977	0.224315	1.37605e-10	0.584787	protein_coding	TRUE
chr3	cg10802521	ENSG00000114904	rs3733039	NEK4	-14.159	2.24734	2.97046e-10	0.584197	protein_coding	TRUE
chr3	cg02058357	ENSG00000183185	rs12491083	GABRR3	-62.2081	10.1321	8.2673e-10	0.582326	protein_coding	TRUE
chr3	cg02145593	ENSG00000178467	rs6792510	P4HTM	13.7249	2.18577	3.40316e-10	0.581896	protein_coding	TRUE
chr3	cg24205871	ENSG00000163938	rs11922961	GNL3	-10.836	1.95165	2.82079e-08	0.577118	protein_coding	TRUE
chr3	cg03060158	ENSG00000198218	rs7610519	QRICH1	-24.4415	4.43382	3.53751e-08	0.574966	protein_coding	TRUE
chr3	cg00831726	ENSG00000241570	rs16852909	PAQR9-AS1	-4.16326	0.540629	1.35252e-14	0.57402	antisense	TRUE
chr3	cg15547764	ENSG00000261758	rs864437	RP11-102M11.2	-2.41943	0.391301	6.28738e-10	0.563569	antisense	TRUE
chr3	cg15547764	ENSG00000114054	rs864437	PCCB	-5.9119	1.03629	1.16434e-08	0.561207	protein_coding	TRUE
chr3	cg12873189	ENSG00000251474	rs6770691	RPL32P3	9.21729	1.60841	1.00029e-08	0.552626	transcribed_unprocessed_pseudogene	TRUE
chr3	cg26129759	ENSG00000113812	rs999515	ACTR8	-2.76241	0.299159	2.60858e-20	0.550373	protein_coding	TRUE
chr3	cg08314989	ENSG00000240567	rs6774276	RP11-3P17.4	-0.973285	0.18011	6.52273e-08	0.544641	lincRNA	TRUE
chr3	cg18349522	ENSG00000280739	rs11718621	EIF1B-AS1	-1.02908	0.206644	6.3597e-07	0.535804	processed_transcript	TRUE
chr3	cg11305249	ENSG00000114054	rs35597261	PCCB	-6.92533	0.957916	4.84508e-13	0.5345	protein_coding	TRUE
chr3	cg03447975	ENSG00000132155	rs709165	RAF1	47.7543	9.54194	5.59568e-07	0.533449	protein_coding	TRUE
chr3	cg11100080	ENSG00000073792	rs35430985	IGF2BP2	-17.7629	3.38138	1.49521e-07	0.530025	protein_coding	TRUE
chr3	cg26068305	ENSG00000239213	rs62410436	NCK1-AS1	0.739464	0.114266	9.70838e-11	0.52531	antisense	TRUE
chr3	cg03187166	ENSG00000114446	rs17231503	IFT57	4.77161	0.599545	1.73833e-15	0.523978	protein_coding	TRUE
chr3	cg17716965	ENSG00000280422	rs115745575	RP11-155D18.13	-29.3633	5.84222	5.00672e-07	0.521771	TEC	TRUE
chr3	cg13474179	ENSG00000079257	rs61794797	LXN	-2.45164	0.403259	1.20513e-09	0.5199	protein_coding	TRUE
chr3	cg23970189	ENSG00000113812	rs5849017	ACTR8	-4.98552	0.834404	2.30161e-09	0.519185	protein_coding	TRUE
chr3	cg12941836	ENSG00000163938	rs6769789	GNL3	-11.9101	2.03885	5.17052e-09	0.50953	protein_coding	TRUE
chr3	cg20533576	ENSG00000255021	rs7610197	RP11-536I6.2	-8.13632	0.684912	1.5153e-32	0.488196	lincRNA	TRUE
chr3	cg19378537	ENSG00000163931	rs12054426	TKT	30.7809	4.96309	5.57613e-10	0.479843	protein_coding	TRUE
chr3	cg07702554	ENSG00000173421	rs10691654	CCDC36	0.734118	0.0929083	2.75499e-15	0.479311	protein_coding	TRUE
chr3	cg25982743	ENSG00000157152	rs5846749	SYN2	17.7365	3.32001	9.17685e-08	0.47765	protein_coding	TRUE
chr3	cg00831726	ENSG00000188582	rs16852909	PAQR9	-2.03724	0.319973	1.92862e-10	0.474286	protein_coding	TRUE
chr3	cg18099408	ENSG00000114904	rs7614981	NEK4	10.1575	1.7626	8.27483e-09	0.474008	protein_coding	TRUE
chr3	cg07702554	ENSG00000178467	rs10691654	P4HTM	4.13766	0.613111	1.49249e-11	0.470513	protein_coding	TRUE
chr3	cg09503974	ENSG00000079257	rs56093991	LXN	2.64812	0.369878	8.10043e-13	0.467117	protein_coding	TRUE
chr3	cg22029806	ENSG00000196776	rs17231503	CD47	-286.375	30.7986	1.42681e-20	0.465848	protein_coding	TRUE
chr3	cg11741004	ENSG00000114446	rs17231503	IFT57	9.15379	1.32971	5.81659e-12	0.463514	protein_coding	TRUE
chr3	cg03060158	ENSG00000178467	rs7610519	P4HTM	15.0811	3.0546	7.92624e-07	0.459188	protein_coding	TRUE
chr3	cg19891817	ENSG00000164076	rs60429865	CAMKV	43.9683	7.64673	8.92681e-09	0.458049	protein_coding	TRUE
chr3	cg18951035	ENSG00000206538	rs904115	VGLL3	7.07193	1.39763	4.19357e-07	0.455977	protein_coding	TRUE
chr3	cg09170012	ENSG00000251474	rs58508862	RPL32P3	7.95963	1.4739	6.64992e-08	0.455167	transcribed_unprocessed_pseudogene	TRUE
chr3	cg06981309	ENSG00000188313	rs76774339	PLSCR1	-12.2887	2.07165	2.99574e-09	0.455045	protein_coding	TRUE
chr3	cg11142705	ENSG00000157093	rs697342	LYZL4	1.21246	0.212988	1.25092e-08	0.452102	protein_coding	TRUE
chr3	cg07969202	ENSG00000164076	rs6800021	CAMKV	25.4734	4.63531	3.89576e-08	0.451435	protein_coding	TRUE
chr3	cg19830534	ENSG00000113812	rs2276843	ACTR8	-9.63563	1.61419	2.38219e-09	0.446753	protein_coding	TRUE
chr3	cg22875243	ENSG00000114491	rs4677943	UMPS	1.83929	0.289748	2.18285e-10	0.446292	protein_coding	TRUE
chr3	cg08193579	ENSG00000171757	rs9878797	LRRC34	-7.68958	0.944257	3.83935e-16	0.445057	protein_coding	TRUE
chr3	cg08104207	ENSG00000255021	rs6772730	RP11-536I6.2	-21.0614	2.99549	2.05008e-12	0.442059	lincRNA	TRUE
chr3	cg05105276	ENSG00000156931	rs9864807	VPS8	-10.6571	1.92721	3.20613e-08	0.433933	protein_coding	TRUE
chr3	cg02073558	ENSG00000163808	rs34532492	KIF15	-0.325013	0.0652805	6.40074e-07	0.43386	protein_coding	TRUE
chr3	cg03520471	ENSG00000183185	rs12491083	GABRR3	-67.9741	10.5871	1.35858e-10	0.428474	protein_coding	TRUE
chr3	cg15452985	ENSG00000163681	rs183853	SLMAP	-17.9934	3.5794	4.98364e-07	0.428045	protein_coding	TRUE
chr3	cg18697348	ENSG00000113812	rs999515	ACTR8	-2.38113	0.232161	1.10823e-24	0.421	protein_coding	TRUE
chr3	cg05344026	ENSG00000269984	rs9878797	RP11-362K14.5	-2.73599	0.480498	1.24048e-08	0.419308	antisense	TRUE
chr3	cg13668339	ENSG00000241316	rs9864493	SUCLG2-AS1	-2.01591	0.376762	8.76529e-08	0.415739	lincRNA	TRUE
chr3	cg12807187	ENSG00000163412	rs73090620	EIF4E3	8.12637	1.64833	8.22085e-07	0.415567	protein_coding	TRUE
chr3	cg13544074	ENSG00000255021	rs10865725	RP11-536I6.2	-26.5805	4.60095	7.59615e-09	0.415175	lincRNA	TRUE
chr3	cg18622097	ENSG00000168827	rs12636691	GFM1	54.7992	9.87144	2.83581e-08	0.413318	protein_coding	TRUE
chr3	cg18487916	ENSG00000055955	rs12486554	ITIH4	8.46294	1.70311	6.72595e-07	0.407466	protein_coding	TRUE
chr3	cg19787535	ENSG00000179097	rs12488028	HTR1F	-6.69466	1.22558	4.69602e-08	0.405074	protein_coding	TRUE
chr3	cg25516803	ENSG00000157093	rs42777	LYZL4	1.23088	0.184664	2.63722e-11	0.398618	protein_coding	TRUE
chr3	cg12790627	ENSG00000255021	rs6772730	RP11-536I6.2	-10.9355	0.96017	4.73714e-30	0.397264	lincRNA	TRUE
chr3	cg05485589	ENSG00000070476	rs114432599	ZXDC	11.5251	1.84181	3.91248e-10	0.39435	protein_coding	TRUE
chr3	cg22024966	ENSG00000163933	rs1864367	RFT1	-6.29576	0.649401	3.17532e-22	0.393235	protein_coding	TRUE
chr3	cg02902545	ENSG00000164045	rs1134867	CDC25A	7.01793	1.20785	6.23698e-09	0.390147	protein_coding	TRUE
chr3	cg09010134	ENSG00000164045	rs9830016	CDC25A	-5.66863	0.713494	1.94359e-15	0.378903	protein_coding	TRUE
chr3	cg01620781	ENSG00000251474	rs749281	RPL32P3	9.29268	1.68079	3.22511e-08	0.370209	transcribed_unprocessed_pseudogene	TRUE
chr3	cg23956648	ENSG00000073792	rs5855073	IGF2BP2	-17.7211	2.54599	3.39252e-12	0.360518	protein_coding	TRUE
chr3	cg12491496	ENSG00000132155	rs201895405	RAF1	-59.305	11.6759	3.78905e-07	0.358979	protein_coding	TRUE
chr3	cg11946769	ENSG00000164045	rs4404473	CDC25A	4.16432	0.444277	7.03418e-21	0.358699	protein_coding	TRUE
chr3	cg03420443	ENSG00000113971	rs61080008	NPHP3	-60.6883	12.0844	5.11223e-07	0.353236	protein_coding	TRUE
chr3	cg03022575	ENSG00000168038	rs145238921	ULK4	12.9017	1.61218	1.21776e-15	0.345403	protein_coding	TRUE
chr3	cg03123551	ENSG00000176945	rs2641733	MUC20	-18.4831	3.71099	6.33739e-07	0.340633	protein_coding	TRUE
chr3	cg03098937	ENSG00000004534	rs9843653	RBM6	-284.798	51.8195	3.88591e-08	0.33951	protein_coding	TRUE
chr3	cg09010134	ENSG00000164048	rs9830016	ZNF589	-46.9754	5.52876	1.95309e-17	0.338477	protein_coding	TRUE
chr3	cg27533700	ENSG00000157036	rs2284817	EXOG	6.64063	0.859865	1.13733e-14	0.335479	protein_coding	TRUE
chr3	cg16306190	ENSG00000269984	rs9878797	RP11-362K14.5	-0.996122	0.167696	2.8497e-09	0.330778	antisense	TRUE
chr3	cg07636037	ENSG00000213672	rs9841640	NCKIPSD	2.29717	0.439906	1.77052e-07	0.32992	protein_coding	TRUE
chr3	cg18267381	ENSG00000151789	rs675104	ZNF385D	44.4188	7.12587	4.56252e-10	0.32339	protein_coding	TRUE
chr3	cg16340485	ENSG00000129055	rs9985341	ANAPC13	-13.4245	1.85549	4.65363e-13	0.320801	protein_coding	TRUE
chr3	cg18337363	ENSG00000163938	rs12489828	GNL3	-12.7346	2.25369	1.5996e-08	0.317174	protein_coding	TRUE
chr3	cg11197418	ENSG00000241316	rs138447649	SUCLG2-AS1	-0.796875	0.102735	8.72538e-15	0.304626	lincRNA	TRUE
chr3	cg06362328	ENSG00000004534	rs139738301	RBM6	-93.543	10.8968	9.12712e-18	0.304021	protein_coding	TRUE
chr3	cg27467234	ENSG00000269984	rs9878797	RP11-362K14.5	-2.40537	0.393212	9.52217e-10	0.300549	antisense	TRUE
chr3	cg26852032	ENSG00000114904	rs2239549	NEK4	9.99933	1.42416	2.19943e-12	0.298999	protein_coding	TRUE
chr3	cg13787933	ENSG00000177311	rs13069734	ZBTB38	-38.3466	7.31006	1.55659e-07	0.295545	protein_coding	TRUE
chr3	cg18339519	ENSG00000170017	rs13322961	ALCAM	-12.6386	2.01479	3.54394e-10	0.295433	protein_coding	TRUE
chr3	cg13333267	ENSG00000004534	rs76367790	RBM6	-247.06	50.1381	8.32459e-07	0.293645	protein_coding	TRUE
chr3	cg26077378	ENSG00000151789	rs34651001	ZNF385D	32.5432	5.03	9.81263e-11	0.287898	protein_coding	TRUE
chr3	cg11645453	ENSG00000055955	rs4687663	ITIH4	3.92146	0.397187	5.44723e-23	0.287503	protein_coding	TRUE
chr3	cg15433422	ENSG00000114503	rs35762682	NCBP2	-36.5037	6.43298	1.39133e-08	0.286322	protein_coding	TRUE
chr3	cg08538682	ENSG00000079257	rs9817928	LXN	-1.47699	0.19871	1.06238e-13	0.273663	protein_coding	TRUE
chr3	cg08023500	ENSG00000151789	rs34651001	ZNF385D	32.1191	4.77976	1.81954e-11	0.271113	protein_coding	TRUE
chr3	cg08932533	ENSG00000114446	rs17231503	IFT57	3.9561	0.491042	7.84857e-16	0.268301	protein_coding	TRUE
chr3	cg18487916	ENSG00000163938	rs12486554	GNL3	-12.2608	2.28662	8.2319e-08	0.267451	protein_coding	TRUE
chr3	cg11545232	ENSG00000197980	rs59531262	LEKR1	-1.55906	0.252412	6.5484e-10	0.259726	protein_coding	TRUE
chr3	cg12397426	ENSG00000269984	rs9878797	RP11-362K14.5	-1.6579	0.253015	5.65531e-11	0.257501	antisense	TRUE
chr3	cg07636037	ENSG00000178467	rs9841640	P4HTM	4.53793	0.637509	1.09323e-12	0.254933	protein_coding	TRUE
chr3	cg11030744	ENSG00000231177	rs35681	LINC00852	0.369508	0.0532165	3.82552e-12	0.254773	antisense	TRUE
chr3	cg17784863	ENSG00000271976	rs66948730	RP11-884K10.7	-1.77797	0.331503	8.16828e-08	0.25442	antisense	TRUE
chr3	cg08365687	ENSG00000163938	rs1010554	GNL3	-7.10475	1.04397	1.00711e-11	0.253888	protein_coding	TRUE
chr3	cg07654934	ENSG00000079257	rs9817928	LXN	-1.50319	0.207766	4.65489e-13	0.252218	protein_coding	TRUE
chr3	cg02056062	ENSG00000114744	rs6764160	COMMD2	-6.99144	1.23002	1.3157e-08	0.250045	protein_coding	TRUE
chr3	cg01951420	ENSG00000173226	rs56201969	IQCB1	4.32291	0.376109	1.41795e-30	0.244114	protein_coding	TRUE
chr3	cg12991365	ENSG00000113812	rs62253003	ACTR8	-24.9909	4.32213	7.37827e-09	0.244012	protein_coding	TRUE
chr3	cg10802521	ENSG00000163938	rs3733039	GNL3	-9.12607	1.58397	8.33592e-09	0.240902	protein_coding	TRUE
chr3	cg18099408	ENSG00000163938	rs7614981	GNL3	7.58037	1.33233	1.2738e-08	0.240346	protein_coding	TRUE
chr3	cg09375816	ENSG00000144559	rs62248586	TAMM41	-10.4525	1.76582	3.2321e-09	0.236484	protein_coding	TRUE
chr3	cg23637907	ENSG00000163938	rs12489828	GNL3	-8.97434	1.49667	2.02001e-09	0.23224	protein_coding	TRUE
chr3	cg19186409	ENSG00000164048	rs11330263	ZNF589	37.7391	7.62513	7.44796e-07	0.23178	protein_coding	TRUE
chr3	cg03342759	ENSG00000240567	rs899275	RP11-3P17.4	0.682591	0.0977061	2.82489e-12	0.231161	lincRNA	TRUE
chr3	cg07908924	ENSG00000163933	rs9824325	RFT1	15.9064	2.88969	3.70172e-08	0.230979	protein_coding	TRUE
chr3	cg01106040	ENSG00000070476	rs146413515	ZXDC	9.29593	1.35384	6.5871e-12	0.230467	protein_coding	TRUE
chr3	cg22210627	ENSG00000079257	rs56093991	LXN	-1.5742	0.193729	4.44537e-16	0.221268	protein_coding	TRUE
chr3	cg26072338	ENSG00000114646	rs13319205	CSPG5	17.3767	3.20469	5.88438e-08	0.219621	protein_coding	TRUE
chr3	cg12930392	ENSG00000180370	rs75185655	PAK2	-9.02303	1.08105	7.03108e-17	0.218421	protein_coding	TRUE
chr3	cg06806080	ENSG00000114446	rs17231503	IFT57	5.99076	0.749372	1.30225e-15	0.215265	protein_coding	TRUE
chr3	cg15147215	ENSG00000163938	rs9853056	GNL3	4.52481	0.624178	4.19115e-13	0.213599	protein_coding	TRUE
chr3	cg10180510	ENSG00000157036	rs199543530	EXOG	-9.07743	1.55771	5.6296e-09	0.212974	protein_coding	TRUE
chr3	cg25996042	ENSG00000079257	rs56093991	LXN	-2.42513	0.320334	3.71448e-14	0.205738	protein_coding	TRUE
chr3	cg27294008	ENSG00000163938	rs11337750	GNL3	-8.20114	1.53152	8.56043e-08	0.205436	protein_coding	TRUE
chr3	cg11030744	ENSG00000240288	rs35681	GHRLOS	0.682714	0.0906015	4.87019e-14	0.205031	antisense	TRUE
chr3	cg12422228	ENSG00000114446	rs17231503	IFT57	6.97293	0.912813	2.19006e-14	0.203281	protein_coding	TRUE
chr3	cg07693931	ENSG00000168827	rs6785658	GFM1	-28.972	3.17498	7.16689e-20	0.20187	protein_coding	TRUE
chr3	cg15729578	ENSG00000260261	rs141910942	RP11-480A16.1	6.82705	1.06218	1.29823e-10	0.201436	lincRNA	TRUE
chr3	cg13286620	ENSG00000131379	rs2053017	C3orf20	0.763894	0.136812	2.35699e-08	0.192466	protein_coding	TRUE
chr3	cg16814023	ENSG00000271976	rs2276843	RP11-884K10.7	-0.784828	0.125187	3.62837e-10	0.189045	antisense	TRUE
chr3	cg11849564	ENSG00000163938	rs4282054	GNL3	4.94629	0.656402	4.86629e-14	0.186441	protein_coding	TRUE
chr3	cg07891854	ENSG00000144821	rs11710010	MYH15	6.96717	1.34444	2.19249e-07	0.184009	protein_coding	TRUE
chr3	cg08787647	ENSG00000163913	rs149948721	IFT122	6.05978	1.18422	3.10284e-07	0.181756	protein_coding	TRUE
chr3	cg06801544	ENSG00000113812	rs9878562	ACTR8	-20.6791	2.95241	2.48499e-12	0.180663	protein_coding	TRUE
chr3	cg07636037	ENSG00000173421	rs9841640	CCDC36	0.809493	0.0942638	8.88627e-18	0.171508	protein_coding	TRUE
chr3	cg00414292	ENSG00000228252	rs11714778	COL6A4P2	6.62099	1.32846	6.22928e-07	0.166883	unitary_pseudogene	TRUE
chr3	cg23707559	ENSG00000269984	rs9878797	RP11-362K14.5	-1.71874	0.305153	1.77721e-08	0.161482	antisense	TRUE
chr3	cg00832555	ENSG00000269984	rs9878797	RP11-362K14.5	-1.9576	0.316498	6.20265e-10	0.161373	antisense	TRUE
chr3	cg20828052	ENSG00000144909	rs7625936	OSBPL11	-0.913199	0.16655	4.18095e-08	0.161201	protein_coding	TRUE
chr3	cg02487233	ENSG00000114446	rs17231503	IFT57	8.9881	1.24714	5.72114e-13	0.160191	protein_coding	TRUE
chr3	cg05344026	ENSG00000171757	rs9878797	LRRC34	-14.5472	2.46962	3.85161e-09	0.158062	protein_coding	TRUE
chr3	cg01079515	ENSG00000260261	rs141910942	RP11-480A16.1	1.96288	0.284187	4.9495e-12	0.156141	lincRNA	TRUE
chr3	cg18337363	ENSG00000114904	rs12489828	NEK4	-17.0667	2.9823	1.04869e-08	0.155825	protein_coding	TRUE
chr3	cg27533704	ENSG00000079257	rs56093991	LXN	-1.57856	0.200089	3.03899e-15	0.154814	protein_coding	TRUE
chr3	cg06047990	ENSG00000260261	rs112897657	RP11-480A16.1	-2.40226	0.350929	7.62539e-12	0.147518	lincRNA	TRUE
chr3	cg21612339	ENSG00000173540	rs1128535	GMPPB	-1.71606	0.263308	7.1581e-11	0.146804	protein_coding	TRUE
chr3	cg24332767	ENSG00000156931	rs6444035	VPS8	-22.4182	3.46797	1.01731e-10	0.146753	protein_coding	TRUE
chr3	cg12896421	ENSG00000079257	rs56093991	LXN	-1.9506	0.260282	6.67175e-14	0.142777	protein_coding	TRUE
chr3	cg00492070	ENSG00000114446	rs17231503	IFT57	6.54432	0.844728	9.39029e-15	0.140634	protein_coding	TRUE
chr3	cg25509174	ENSG00000163710	rs2707982	PCOLCE2	-1.86586	0.356227	1.62478e-07	0.139867	protein_coding	TRUE
chr3	cg20104055	ENSG00000154767	rs2733551	XPC	-9.45951	1.73671	5.12832e-08	0.13979	protein_coding	TRUE
chr3	cg24205871	ENSG00000114904	rs11922961	NEK4	-12.0809	2.37935	3.826e-07	0.138968	protein_coding	TRUE
chr3	cg15729578	ENSG00000224769	rs141910942	MUC20P1	8.31493	1.39834	2.74309e-09	0.13809	unprocessed_pseudogene	TRUE
chr3	cg02933413	ENSG00000169359	rs5853729	SLC33A1	-5.86414	1.13429	2.34276e-07	0.134452	protein_coding	TRUE
chr3	cg08528616	ENSG00000070476	rs11718043	ZXDC	18.1392	3.46091	1.59556e-07	0.133487	protein_coding	TRUE
chr3	cg11601932	ENSG00000224769	rs76007885	MUC20P1	-8.70819	1.59197	4.49873e-08	0.127367	unprocessed_pseudogene	TRUE
chr3	cg18622097	ENSG00000118849	rs12488114	RARRES1	-4.73735	0.873726	5.89317e-08	0.127362	protein_coding	TRUE
chr3	cg08095637	ENSG00000269984	rs9878797	RP11-362K14.5	-1.62384	0.254074	1.64564e-10	0.126109	antisense	TRUE
chr3	cg23637907	ENSG00000114904	rs12489828	NEK4	-12.0273	1.97733	1.18248e-09	0.125921	protein_coding	TRUE
chr3	cg01304814	ENSG00000173421	rs1048940	CCDC36	-1.01206	0.198383	3.36934e-07	0.125308	protein_coding	TRUE
chr3	cg04714994	ENSG00000269984	rs9878797	RP11-362K14.5	-3.11289	0.5226	2.5763e-09	0.123459	antisense	TRUE
chr3	cg16997058	ENSG00000168827	rs56093991	GFM1	-15.5868	1.99561	5.69357e-15	0.12334	protein_coding	TRUE
chr3	cg11741004	ENSG00000279277	rs17231503	RP11-861A13.3	-5.07743	0.665278	2.31052e-14	0.12191	TEC	TRUE
chr3	cg17977250	ENSG00000079257	rs56093991	LXN	-2.23561	0.302092	1.35742e-13	0.121632	protein_coding	TRUE
chr3	cg04796774	ENSG00000173540	rs13084037	GMPPB	3.23523	0.416954	8.54589e-15	0.118546	protein_coding	TRUE
chr3	cg01500877	ENSG00000114503	rs7433167	NCBP2	-12.3296	1.82407	1.38561e-11	0.118508	protein_coding	TRUE
chr3	cg22302082	ENSG00000163576	rs113706625	EFHB	2.61935	0.464383	1.69557e-08	0.118393	protein_coding	TRUE
chr3	cg08365687	ENSG00000114904	rs1010554	NEK4	-9.74088	1.38237	1.83437e-12	0.118348	protein_coding	TRUE
chr3	cg11645453	ENSG00000243696	rs4687663	RP5-966M1.6	3.69939	0.389524	2.15613e-21	0.117528	protein_coding	TRUE
chr3	cg03187166	ENSG00000279277	rs17231503	RP11-861A13.3	-2.64672	0.288166	4.12667e-20	0.117398	TEC	TRUE
chr3	cg16306190	ENSG00000171757	rs9878797	LRRC34	-5.29635	0.859238	7.09285e-10	0.117108	protein_coding	TRUE
chr3	cg11601932	ENSG00000260261	rs76007885	RP11-480A16.1	-7.19255	1.22506	4.32746e-09	0.116353	lincRNA	TRUE
chr3	cg24655016	ENSG00000269984	rs9878797	RP11-362K14.5	-1.62	0.241204	1.86382e-11	0.115212	antisense	TRUE
chr3	cg15825032	ENSG00000070476	rs6810140	ZXDC	17.7539	2.37513	7.72685e-14	0.114688	protein_coding	TRUE
chr3	cg24110177	ENSG00000173540	rs10603676	GMPPB	-3.31056	0.60064	3.55334e-08	0.111335	protein_coding	TRUE
chr3	cg18685394	ENSG00000114812	rs40415	VIPR1	-2.4068	0.406813	3.29402e-09	0.110709	protein_coding	TRUE
chr3	cg04532718	ENSG00000156931	rs78004904	VPS8	-5.31713	0.941914	1.65156e-08	0.109284	protein_coding	TRUE
chr3	cg07690219	ENSG00000198218	rs11320656	QRICH1	-12.3893	1.89575	6.34868e-11	0.108915	protein_coding	TRUE
chr3	cg16460462	ENSG00000156931	rs35750106	VPS8	-7.38994	1.10762	2.52524e-11	0.107308	protein_coding	TRUE
chr3	cg07598930	ENSG00000164088	rs164640	PPM1M	-1.46784	0.267697	4.17681e-08	0.106962	protein_coding	TRUE
chr3	cg02428746	ENSG00000153560	rs201101782	UBP1	-28.4	5.73108	7.21676e-07	0.105125	protein_coding	TRUE
chr3	cg22373683	ENSG00000214135	rs73891640	AC024560.3	-22.2001	2.40629	2.81324e-20	0.103249	transcribed_unprocessed_pseudogene	TRUE
chr3	cg15848056	ENSG00000163938	rs12489828	GNL3	-6.74896	1.1288	2.24699e-09	0.102193	protein_coding	TRUE
chr3	cg05370380	ENSG00000240288	rs27647	GHRLOS	-0.790906	0.141243	2.14842e-08	0.100643	antisense	TRUE
chr3	cg22826874	ENSG00000163710	rs4683702	PCOLCE2	-5.21304	0.581772	3.22857e-19	0.100154	protein_coding	TRUE
chr3	cg14226182	ENSG00000168827	rs6785658	GFM1	-44.2968	5.55673	1.56449e-15	0.100112	protein_coding	TRUE
chr3	cg09503974	ENSG00000168827	rs56093991	GFM1	-45.506	5.77535	3.29067e-15	0.099815	protein_coding	TRUE
chr3	cg03329597	ENSG00000144821	rs936266	MYH15	-1.09744	0.147701	1.08497e-13	0.099633	protein_coding	TRUE
chr3	cg24308560	ENSG00000173540	rs9815930	GMPPB	4.01516	0.812671	7.78461e-07	0.099164	protein_coding	TRUE
chr3	cg20085261	ENSG00000173540	rs139738301	GMPPB	3.57409	0.691083	2.31942e-07	0.0984822	protein_coding	TRUE
chr3	cg05835982	ENSG00000228252	rs12634803	COL6A4P2	5.06577	0.99129	3.21685e-07	0.0981469	unitary_pseudogene	TRUE
chr3	cg04641947	ENSG00000173540	rs112585167	GMPPB	3.85481	0.703208	4.21138e-08	0.0975528	protein_coding	TRUE
chr3	cg21503504	ENSG00000196220	rs586499	SRGAP3	-11.199	1.93938	7.71851e-09	0.0970651	protein_coding	TRUE
chr3	cg01465620	ENSG00000157036	rs3749386	EXOG	-1.32625	0.158387	5.59499e-17	0.0963158	protein_coding	TRUE
chr3	cg14774165	ENSG00000144559	rs62248586	TAMM41	-4.41589	0.49744	6.85419e-19	0.0933038	protein_coding	TRUE
chr3	cg10056460	ENSG00000175792	rs12107874	RUVBL1	-5.32454	1.0364	2.78405e-07	0.0910658	protein_coding	TRUE
chr3	cg08013793	ENSG00000164076	rs111292574	CAMKV	-50.8834	8.0761	2.967e-10	0.0905579	protein_coding	TRUE
chr3	cg03269060	ENSG00000079257	rs56093991	LXN	1.8993	0.297598	1.74672e-10	0.0891816	protein_coding	TRUE
chr3	cg05066075	ENSG00000173421	rs5848874	CCDC36	1.44386	0.274383	1.42339e-07	0.0878926	protein_coding	TRUE
chr3	cg03060158	ENSG00000173540	rs4858800	GMPPB	-6.21529	1.26124	8.31064e-07	0.0876992	protein_coding	TRUE
chr3	cg25491145	ENSG00000231770	rs6765459	TMEM44-AS1	3.2582	0.303561	7.10343e-27	0.0863986	antisense	TRUE
chr3	cg04911005	ENSG00000079257	rs56093991	LXN	-1.315	0.161923	4.61754e-16	0.0863782	protein_coding	TRUE
chr3	cg07598930	ENSG00000163938	rs164640	GNL3	-4.55622	0.674268	1.40602e-11	0.0860059	protein_coding	TRUE
chr3	cg00383909	ENSG00000173421	rs183270497	CCDC36	-0.577556	0.110971	1.94454e-07	0.0804098	protein_coding	TRUE
chr3	cg15698299	ENSG00000164088	rs181274	PPM1M	-0.968486	0.171556	1.64884e-08	0.0799344	protein_coding	TRUE
chr3	cg21951391	ENSG00000114744	rs4681542	COMMD2	-8.69104	1.61793	7.79911e-08	0.0789929	protein_coding	TRUE
chr3	cg16516295	ENSG00000163913	rs112016935	IFT122	5.42319	0.942186	8.6151e-09	0.0776359	protein_coding	TRUE
chr3	cg27467234	ENSG00000171757	rs9878797	LRRC34	-12.7893	2.01004	1.98248e-10	0.0772272	protein_coding	TRUE
chr3	cg15848056	ENSG00000114904	rs12489828	NEK4	-9.04487	1.49144	1.3235e-09	0.0765618	protein_coding	TRUE
chr3	cg22797653	ENSG00000153560	rs76986939	UBP1	-13.3014	1.88867	1.88495e-12	0.0752421	protein_coding	TRUE
chr3	cg15063505	ENSG00000231770	rs6765459	TMEM44-AS1	5.07997	0.525294	4.016e-22	0.07413	antisense	TRUE
chr3	cg07690219	ENSG00000173540	rs11320656	GMPPB	-4.73588	0.660138	7.27939e-13	0.0707446	protein_coding	TRUE
chr3	cg26129759	ENSG00000113811	rs999515	SELK	7.06114	1.30262	5.93627e-08	0.0707404	protein_coding	TRUE
chr3	cg11645453	ENSG00000164088	rs4687663	PPM1M	-1.10332	0.195572	1.68603e-08	0.0707328	protein_coding	TRUE
chr3	cg12397426	ENSG00000171757	rs9878797	LRRC34	-8.81499	1.28554	7.0314e-12	0.0678338	protein_coding	TRUE
chr3	cg01706045	ENSG00000183185	rs12491083	GABRR3	-82.273	13.6048	1.47249e-09	0.067319	protein_coding	TRUE
chr3	cg12358524	ENSG00000269984	rs9878797	RP11-362K14.5	-1.57027	0.237406	3.73402e-11	0.0660967	antisense	TRUE
chr3	cg18349522	ENSG00000223797	rs11718621	ENTPD3-AS1	-1.8212	0.314365	6.90278e-09	0.0659141	antisense	TRUE
chr3	cg01797371	ENSG00000260261	rs141910942	RP11-480A16.1	-2.32652	0.34186	1.00714e-11	0.0652044	lincRNA	TRUE
chr3	cg23563561	ENSG00000131379	rs2053017	C3orf20	1.03132	0.196784	1.59834e-07	0.064637	protein_coding	TRUE
chr3	cg12941836	ENSG00000114904	rs6769789	NEK4	-13.28	2.50643	1.16837e-07	0.063477	protein_coding	TRUE
chr3	cg16991944	ENSG00000255021	rs7610197	RP11-536I6.2	-5.19504	0.394679	1.43844e-39	0.0633104	lincRNA	TRUE
chr3	cg24858233	ENSG00000260261	rs141910942	RP11-480A16.1	-1.79677	0.25647	2.45648e-12	0.0625898	lincRNA	TRUE
chr3	cg13719885	ENSG00000175792	rs12107874	RUVBL1	-5.2978	1.02793	2.55207e-07	0.0618457	protein_coding	TRUE
chr3	cg05370380	ENSG00000231177	rs27647	LINC00852	-0.401583	0.0809225	6.95703e-07	0.059932	antisense	TRUE
chr3	cg01363574	ENSG00000223797	rs6769627	ENTPD3-AS1	-1.87097	0.34547	6.10387e-08	0.0597604	antisense	TRUE
chr3	cg16814023	ENSG00000113812	rs2276843	ACTR8	-3.86549	0.335587	1.06329e-30	0.0555056	protein_coding	TRUE
chr3	cg04641947	ENSG00000003756	rs112585167	RBM5	-81.1394	14.3874	1.70441e-08	0.0544369	protein_coding	TRUE
chr3	cg08263647	ENSG00000079257	rs6786423	LXN	-2.00167	0.33978	3.83704e-09	0.0542194	protein_coding	TRUE
chr3	cg08049441	ENSG00000163913	rs112016935	IFT122	5.44298	0.945851	8.68581e-09	0.0538794	protein_coding	TRUE
chr3	cg08795948	ENSG00000163902	rs2713606	RPN1	-21.4559	3.94999	5.57613e-08	0.0531273	protein_coding	TRUE
chr3	cg26072338	ENSG00000164048	rs13319205	ZNF589	34.8292	6.67537	1.81292e-07	0.0529364	protein_coding	TRUE
chr3	cg09354317	ENSG00000114904	rs2276823	NEK4	-9.35353	1.68586	2.88594e-08	0.0525184	protein_coding	TRUE
chr3	cg11739587	ENSG00000279277	rs3749274	RP11-861A13.3	-4.26771	0.813458	1.55116e-07	0.0524972	TEC	TRUE
chr3	cg15698299	ENSG00000163938	rs181274	GNL3	-3.04972	0.42154	4.66502e-13	0.0518627	protein_coding	TRUE
chr3	cg06710201	ENSG00000260633	rs6439478	RP11-375I20.6	8.82908	1.66739	1.18921e-07	0.0516789	lincRNA	TRUE
chr3	cg07702554	ENSG00000198218	rs10691654	QRICH1	-5.45872	0.7803	2.64001e-12	0.050556	protein_coding	TRUE
chr3	cg03040360	ENSG00000114446	rs17231503	IFT57	-27.8079	4.9455	1.87812e-08	0.050447	protein_coding	TRUE
chr4	cg14578894	ENSG00000109339	rs139082508	MAPK10	5.88589	1.19898	9.15099e-07	0.998852	protein_coding	TRUE
chr4	cg10832655	ENSG00000173376	rs6534247	NDNF	-34.5011	4.30982	1.19241e-15	0.996856	protein_coding	TRUE
chr4	cg09179589	ENSG00000109381	rs7654084	ELF2	8.19032	1.23809	3.7083e-11	0.996686	protein_coding	TRUE
chr4	cg18728025	ENSG00000173376	rs6534247	NDNF	-24.4489	2.96249	1.54697e-16	0.994531	protein_coding	TRUE
chr4	cg05640431	ENSG00000173376	rs882046	NDNF	59.0251	8.05187	2.29113e-13	0.99218	protein_coding	TRUE
chr4	cg00957698	ENSG00000173376	rs6534247	NDNF	-65.6963	12.6383	2.01221e-07	0.989614	protein_coding	TRUE
chr4	cg15478081	ENSG00000164323	rs3108297	CFAP97	-41.9419	5.16112	4.41856e-16	0.986602	protein_coding	TRUE
chr4	cg02210466	ENSG00000173376	rs6534247	NDNF	-35.628	4.94762	5.97566e-13	0.982385	protein_coding	TRUE
chr4	cg18670770	ENSG00000173376	rs882046	NDNF	-42.5435	5.33092	1.45718e-15	0.974479	protein_coding	TRUE
chr4	cg07776847	ENSG00000273247	rs144682620	RP11-83A24.2	-3.28676	0.604269	5.35115e-08	0.972907	antisense	TRUE
chr4	cg25550573	ENSG00000173376	rs6534247	NDNF	-22.6517	2.69349	4.10702e-17	0.968194	protein_coding	TRUE
chr4	cg21907850	ENSG00000109762	rs3108241	SNX25	-31.0646	2.9273	2.62023e-26	0.941701	protein_coding	TRUE
chr4	cg15799828	ENSG00000168818	rs28666675	STX18	2.17917	0.383345	1.31095e-08	0.938837	protein_coding	TRUE
chr4	cg08240002	ENSG00000164323	rs3108244	CFAP97	-10.7336	0.835583	9.09596e-38	0.926208	protein_coding	TRUE
chr4	cg03509106	ENSG00000173376	rs6534247	NDNF	-57.81	8.57498	1.56529e-11	0.919506	protein_coding	TRUE
chr4	cg05091947	ENSG00000145247	rs374990693	OCIAD2	-3.41615	0.438283	6.47194e-15	0.911343	protein_coding	TRUE
chr4	cg08656504	ENSG00000138778	rs12508128	CENPE	3.79075	0.595352	1.92444e-10	0.908712	protein_coding	TRUE
chr4	cg10131286	ENSG00000138769	rs34962268	CDKL2	-12.65	2.48232	3.46804e-07	0.906153	protein_coding	TRUE
chr4	cg17030386	ENSG00000179979	rs59810282	CRIPAK	21.1266	4.11221	2.78374e-07	0.906101	protein_coding	TRUE
chr4	cg17480221	ENSG00000109519	rs66925245	GRPEL1	-22.7808	4.01401	1.38419e-08	0.898505	protein_coding	TRUE
chr4	cg12836958	ENSG00000164323	rs3108244	CFAP97	-21.0458	1.8557	8.20811e-30	0.897466	protein_coding	TRUE
chr4	cg06277849	ENSG00000109775	rs36058225	UFSP2	42.6244	8.2857	2.68466e-07	0.896189	protein_coding	TRUE
chr4	cg25660036	ENSG00000173011	rs4256224	TADA2B	16.2055	3.21539	4.65579e-07	0.885767	protein_coding	TRUE
chr4	cg05309399	ENSG00000168743	rs10025790	NPNT	2.3448	0.437921	8.5841e-08	0.881522	protein_coding	TRUE
chr4	cg23757056	ENSG00000173011	rs3857181	TADA2B	-9.694	1.91826	4.33718e-07	0.881461	protein_coding	TRUE
chr4	cg22809983	ENSG00000174125	rs5743557	TLR1	-3.28419	0.63784	2.61982e-07	0.878124	protein_coding	TRUE
chr4	cg23757056	ENSG00000109519	rs3857181	GRPEL1	-12.7337	2.1438	2.8539e-09	0.870009	protein_coding	TRUE
chr4	cg17480221	ENSG00000173011	rs66925245	TADA2B	-18.7061	3.78669	7.81344e-07	0.860515	protein_coding	TRUE
chr4	cg10150813	ENSG00000091490	rs6841648	SEL1L3	-47.8671	9.73568	8.80286e-07	0.841892	protein_coding	TRUE
chr4	cg21546981	ENSG00000242686	rs4518182	RP11-1191J2.2	-7.75167	1.14512	1.29424e-11	0.833398	antisense	TRUE
chr4	cg05095125	ENSG00000059691	rs6818667	GATB	-23.2737	3.50694	3.21276e-11	0.829122	protein_coding	TRUE
chr4	cg24747012	ENSG00000197894	rs1154410	ADH5	-7.31158	1.44463	4.16587e-07	0.822581	protein_coding	TRUE
chr4	cg01881046	ENSG00000164323	rs3108244	CFAP97	-12.6947	0.981992	3.14921e-38	0.810201	protein_coding	TRUE
chr4	cg24290320	ENSG00000071205	rs147731839	ARHGAP10	-30.659	5.7019	7.57425e-08	0.794366	protein_coding	TRUE
chr4	cg07557423	ENSG00000124406	rs2612520	ATP8A1	-69.988	10.3318	1.25238e-11	0.793936	protein_coding	TRUE
chr4	cg06528001	ENSG00000145365	rs4834255	TIFA	4.58819	0.893679	2.83583e-07	0.79343	protein_coding	TRUE
chr4	cg08948841	ENSG00000196810	rs3775092	CTBP1-AS2	2.53589	0.306912	1.42516e-16	0.783412	antisense	TRUE
chr4	cg08714767	ENSG00000091490	rs9647441	SEL1L3	-47.0271	9.54445	8.34286e-07	0.780664	protein_coding	TRUE
chr4	cg00563678	ENSG00000170153	rs78038613	RNF150	-106.182	17.9884	3.57397e-09	0.779521	protein_coding	TRUE
chr4	cg12836958	ENSG00000109762	rs3108244	SNX25	-22.6392	2.05144	2.5699e-28	0.777904	protein_coding	TRUE
chr4	cg06697600	ENSG00000173011	rs3857180	TADA2B	11.2498	1.68525	2.46437e-11	0.775654	protein_coding	TRUE
chr4	cg04462898	ENSG00000145390	rs10212714	USP53	-11.0687	2.14696	2.52958e-07	0.770736	protein_coding	TRUE
chr4	cg10814722	ENSG00000091490	rs936234	SEL1L3	-49.8982	9.43516	1.23299e-07	0.765326	protein_coding	TRUE
chr4	cg04122972	ENSG00000196810	rs4974545	CTBP1-AS2	3.95542	0.584021	1.26376e-11	0.761368	antisense	TRUE
chr4	cg01881046	ENSG00000109762	rs3108244	SNX25	-13.6558	1.09417	9.53709e-36	0.741657	protein_coding	TRUE
chr4	cg12133491	ENSG00000138796	rs10018478	HADH	-4.30536	0.540223	1.59192e-15	0.737879	protein_coding	TRUE
chr4	cg25650649	ENSG00000164128	rs141208448	NPY1R	-8.72651	1.67098	1.76643e-07	0.733147	protein_coding	TRUE
chr4	cg08460358	ENSG00000273247	rs34989554	RP11-83A24.2	-3.71207	0.729261	3.57733e-07	0.731678	antisense	TRUE
chr4	cg10676327	ENSG00000170846	rs73211706	AC093323.3	-5.37943	0.825525	7.20249e-11	0.716509	lincRNA	TRUE
chr4	cg06481168	ENSG00000250486	rs3733419	FAM218A	1.79682	0.345246	1.94568e-07	0.710011	protein_coding	TRUE
chr4	cg18681998	ENSG00000002549	rs371328303	LAP3	-13.223	2.43741	5.79451e-08	0.708317	protein_coding	TRUE
chr4	cg05492934	ENSG00000059691	rs1896883	GATB	50.1973	8.94429	1.99756e-08	0.707917	protein_coding	TRUE
chr4	cg07650665	ENSG00000251432	rs17013275	RP11-420A23.1	-2.09207	0.346719	1.60039e-09	0.707834	lincRNA	TRUE
chr4	cg03344043	ENSG00000273247	rs55953885	RP11-83A24.2	5.8651	1.13073	2.13716e-07	0.706252	antisense	TRUE
chr4	cg26116260	ENSG00000109519	rs34216360	GRPEL1	-20.8156	2.17389	1.01604e-21	0.697911	protein_coding	TRUE
chr4	cg11351471	ENSG00000137628	rs56999040	DDX60	-5.79917	1.0723	6.36773e-08	0.695964	protein_coding	TRUE
chr4	cg04683119	ENSG00000151806	rs7663750	GUF1	6.69255	1.32616	4.49849e-07	0.670349	protein_coding	TRUE
chr4	cg03886687	ENSG00000109339	rs139082508	MAPK10	4.9705	0.931579	9.52495e-08	0.666559	protein_coding	TRUE
chr4	cg26807632	ENSG00000170153	rs2220344	RNF150	-76.949	14.2084	6.10415e-08	0.665863	protein_coding	TRUE
chr4	cg26479374	ENSG00000196810	rs2199956	CTBP1-AS2	2.83358	0.416747	1.05138e-11	0.66109	antisense	TRUE
chr4	cg13467274	ENSG00000182168	rs17024152	UNC5C	-11.5503	2.12438	5.41849e-08	0.657438	protein_coding	TRUE
chr4	cg12746427	ENSG00000250312	rs2353623	ZNF718	21.9277	3.35316	6.1761e-11	0.656876	protein_coding	TRUE
chr4	cg13281248	ENSG00000196810	rs4974545	CTBP1-AS2	6.47944	1.09634	3.4195e-09	0.645267	antisense	TRUE
chr4	cg17998594	ENSG00000164323	rs3108244	CFAP97	-41.2463	5.52282	8.12095e-14	0.634878	protein_coding	TRUE
chr4	cg12654519	ENSG00000071205	rs200445508	ARHGAP10	-69.5391	11.1011	3.74869e-10	0.634162	protein_coding	TRUE
chr4	cg04857710	ENSG00000168491	rs4862535	CCDC110	-1.38097	0.230078	1.94668e-09	0.611951	protein_coding	TRUE
chr4	cg04672903	ENSG00000251580	rs2301787	RP11-539L10.3	-1.5036	0.277164	5.79706e-08	0.610175	lincRNA	TRUE
chr4	cg06697600	ENSG00000109519	rs3857180	GRPEL1	13.6659	1.53243	4.75684e-19	0.593252	protein_coding	TRUE
chr4	cg22349956	ENSG00000169762	rs73128416	TAPT1	-156.787	30.9588	4.09778e-07	0.592739	protein_coding	TRUE
chr4	cg04703765	ENSG00000090316	rs3834218	MAEA	8.21004	1.52748	7.66276e-08	0.592267	protein_coding	TRUE
chr4	cg00646813	ENSG00000174125	rs73236629	TLR1	-3.79089	0.77155	8.95347e-07	0.576114	protein_coding	TRUE
chr4	cg11427455	ENSG00000170153	rs78038613	RNF150	-76.4406	13.1426	6.01788e-09	0.575983	protein_coding	TRUE
chr4	cg11804293	ENSG00000180346	rs62306397	TIGD2	-1.44683	0.277221	1.79861e-07	0.575494	protein_coding	TRUE
chr4	cg02722613	ENSG00000281501	rs62411565	SEPSECS-AS1	-3.80902	0.424044	2.64444e-19	0.553529	antisense	TRUE
chr4	cg04816971	ENSG00000138735	rs4336213	PDE5A	-10.0996	1.79009	1.68147e-08	0.546029	protein_coding	TRUE
chr4	cg17998594	ENSG00000109762	rs3108244	SNX25	-44.3691	6.01281	1.59359e-13	0.544676	protein_coding	TRUE
chr4	cg04849770	ENSG00000251200	rs17711139	RP11-6E9.5	-36.4552	7.38478	7.95244e-07	0.538033	antisense	TRUE
chr4	cg21907850	ENSG00000164323	rs3108241	CFAP97	-29.6618	2.68049	1.83714e-28	0.537775	protein_coding	TRUE
chr4	cg08095852	ENSG00000150627	rs34435561	WDR17	-84.1795	10.8406	8.15236e-15	0.527897	protein_coding	TRUE
chr4	cg08240002	ENSG00000109762	rs3108244	SNX25	-11.5463	0.930638	2.39936e-35	0.525826	protein_coding	TRUE
chr4	cg10296425	ENSG00000169762	rs317855	TAPT1	-159.639	27.124	3.9678e-09	0.51878	protein_coding	TRUE
chr4	cg04058563	ENSG00000151725	rs61539306	CENPU	-0.544048	0.103281	1.38193e-07	0.516531	protein_coding	TRUE
chr4	cg16878920	ENSG00000071205	rs147731839	ARHGAP10	-26.8853	4.7016	1.07569e-08	0.501999	protein_coding	TRUE
chr4	cg02216881	ENSG00000163749	rs1912833	CCDC158	0.4965	0.0994742	5.99914e-07	0.499948	protein_coding	TRUE
chr4	cg26116260	ENSG00000173011	rs34216360	TADA2B	-15.9242	2.32543	7.49822e-12	0.496077	protein_coding	TRUE
chr4	cg24709285	ENSG00000109519	rs3857181	GRPEL1	-25.5949	3.91083	5.96443e-11	0.488456	protein_coding	TRUE
chr4	cg07745915	ENSG00000196810	rs3775092	CTBP1-AS2	5.52159	0.965247	1.06279e-08	0.486456	antisense	TRUE
chr4	cg19113954	ENSG00000281501	rs62411565	SEPSECS-AS1	-3.00664	0.270323	9.76462e-29	0.485746	antisense	TRUE
chr4	cg10171988	ENSG00000245958	rs10006688	RP11-33B1.1	-82.9486	15.7209	1.31795e-07	0.457561	transcribed_unprocessed_pseudogene	TRUE
chr4	cg04172548	ENSG00000198948	rs17660124	MFAP3L	-16.2104	3.22415	4.96152e-07	0.457363	protein_coding	TRUE
chr4	cg01614237	ENSG00000251580	rs4689505	RP11-539L10.3	0.321641	0.0547768	4.3098e-09	0.454368	lincRNA	TRUE
chr4	cg09526685	ENSG00000145476	rs4997687	CYP4V2	-95.9614	15.911	1.62811e-09	0.448115	protein_coding	TRUE
chr4	cg08255636	ENSG00000138688	rs4576025	KIAA1109	164.974	32.817	4.97963e-07	0.441995	protein_coding	TRUE
chr4	cg25897951	ENSG00000196810	rs3775092	CTBP1-AS2	3.33177	0.456213	2.81229e-13	0.438715	antisense	TRUE
chr4	cg25660036	ENSG00000109519	rs4256224	GRPEL1	20.9833	3.58473	4.81255e-09	0.437372	protein_coding	TRUE
chr4	cg18583557	ENSG00000231782	rs6535360	LINC00575	-14.6279	2.51589	6.09244e-09	0.434836	lincRNA	TRUE
chr4	cg08270236	ENSG00000052795	rs3924237	FNIP2	11.2321	2.26719	7.26345e-07	0.428225	protein_coding	TRUE
chr4	cg19539972	ENSG00000109519	rs3796908	GRPEL1	-19.0431	2.35748	6.59848e-16	0.426897	protein_coding	TRUE
chr4	cg16339924	ENSG00000002549	rs10585004	LAP3	-22.9705	4.4913	3.14681e-07	0.424759	protein_coding	TRUE
chr4	cg24358605	ENSG00000163749	rs55740614	CCDC158	0.469871	0.0951097	7.79997e-07	0.421097	protein_coding	TRUE
chr4	cg05095125	ENSG00000251455	rs6818667	RP11-164P12.3	0.769834	0.154406	6.17098e-07	0.417958	antisense	TRUE
chr4	cg09255157	ENSG00000168743	rs7686722	NPNT	0.559887	0.0839706	2.59913e-11	0.415356	protein_coding	TRUE
chr4	cg14022706	ENSG00000245958	rs28622913	RP11-33B1.1	-73.9006	14.1506	1.76599e-07	0.410447	transcribed_unprocessed_pseudogene	TRUE
chr4	cg15799543	ENSG00000251200	rs17660124	RP11-6E9.5	-10.4442	1.49723	3.04381e-12	0.403789	antisense	TRUE
chr4	cg10382689	ENSG00000150627	rs11300698	WDR17	-59.7407	6.77133	1.11838e-18	0.399358	protein_coding	TRUE
chr4	cg13609457	ENSG00000283050	rs368648502	GTF2IP12	2.35519	0.426209	3.27785e-08	0.398001	transcribed_unprocessed_pseudogene	TRUE
chr4	cg05381578	ENSG00000059691	rs6825241	GATB	34.6164	7.00101	7.63453e-07	0.396574	protein_coding	TRUE
chr4	cg24709285	ENSG00000173011	rs3857181	TADA2B	-19.485	3.60131	6.28395e-08	0.39584	protein_coding	TRUE
chr4	cg04172548	ENSG00000251200	rs17660124	RP11-6E9.5	-12.9356	2.30603	2.02985e-08	0.382367	antisense	TRUE
chr4	cg06100622	ENSG00000171503	rs55936281	ETFDH	9.45533	1.79462	1.37395e-07	0.356401	protein_coding	TRUE
chr4	cg01736356	ENSG00000273449	rs12651563	RP11-218F10.3	-0.493956	0.0596066	1.16203e-16	0.355064	lincRNA	TRUE
chr4	cg07207937	ENSG00000138767	rs73827451	CNOT6L	-13.918	1.4713	3.08915e-21	0.346169	protein_coding	TRUE
chr4	cg02057050	ENSG00000087266	rs231333	SH3BP2	-14.1845	2.83142	5.45237e-07	0.345795	protein_coding	TRUE
chr4	cg14003984	ENSG00000174125	rs5743596	TLR1	-3.90045	0.735145	1.12252e-07	0.343904	protein_coding	TRUE
chr4	cg19642231	ENSG00000087008	rs6849528	ACOX3	-3.33527	0.670975	6.66833e-07	0.34217	protein_coding	TRUE
chr4	cg24063912	ENSG00000178222	rs17164380	RNF212	1.30541	0.248194	1.44354e-07	0.329493	protein_coding	TRUE
chr4	cg18995328	ENSG00000138823	rs13130949	MTTP	-27.1061	5.4573	6.80202e-07	0.32429	protein_coding	TRUE
chr4	cg10382041	ENSG00000179979	rs13137852	CRIPAK	16.0742	3.27065	8.89231e-07	0.323175	protein_coding	TRUE
chr4	cg06935464	ENSG00000174125	rs28393318	TLR1	6.00817	1.20099	5.65379e-07	0.322586	protein_coding	TRUE
chr4	cg03348475	ENSG00000084092	rs13146960	NOA1	-1.88656	0.285246	3.74646e-11	0.31598	protein_coding	TRUE
chr4	cg14540093	ENSG00000084092	rs35640834	NOA1	-2.50075	0.426757	4.63173e-09	0.313432	protein_coding	TRUE
chr4	cg10932140	ENSG00000196810	rs4974577	CTBP1-AS2	5.25513	0.784146	2.05976e-11	0.31258	antisense	TRUE
chr4	cg22877957	ENSG00000281501	rs62411565	SEPSECS-AS1	-1.64615	0.139437	3.64731e-32	0.30781	antisense	TRUE
chr4	cg02969873	ENSG00000179979	rs1882105	CRIPAK	-5.26616	0.970104	5.68455e-08	0.30663	protein_coding	TRUE
chr4	cg11351471	ENSG00000181381	rs56999040	DDX60L	-25.889	2.71316	1.40077e-21	0.305358	protein_coding	TRUE
chr4	cg03217528	ENSG00000168491	rs66481949	CCDC110	4.06109	0.664889	1.00933e-09	0.303791	protein_coding	TRUE
chr4	cg20802868	ENSG00000109472	rs12641145	CPE	-77.3066	14.7631	1.63661e-07	0.299545	protein_coding	TRUE
chr4	cg13849548	ENSG00000273247	rs67132335	RP11-83A24.2	-4.15706	0.631764	4.70158e-11	0.298957	antisense	TRUE
chr4	cg03698571	ENSG00000251580	rs4689498	RP11-539L10.3	1.03929	0.208087	5.89925e-07	0.296632	lincRNA	TRUE
chr4	cg15478081	ENSG00000109762	rs3108297	SNX25	-44.9345	5.6146	1.21279e-15	0.294834	protein_coding	TRUE
chr4	cg14867455	ENSG00000283050	rs78709015	GTF2IP12	1.8567	0.315275	3.88215e-09	0.294013	transcribed_unprocessed_pseudogene	TRUE
chr4	cg06435920	ENSG00000109519	rs9986037	GRPEL1	-38.852	7.66438	3.99563e-07	0.293504	protein_coding	TRUE
chr4	cg15799543	ENSG00000198948	rs17660124	MFAP3L	-13.0883	2.20293	2.82719e-09	0.287108	protein_coding	TRUE
chr4	cg27598017	ENSG00000138778	rs11733940	CENPE	2.67735	0.50385	1.07369e-07	0.286751	protein_coding	TRUE
chr4	cg13466364	ENSG00000273247	rs35911076	RP11-83A24.2	-2.77544	0.396691	2.62505e-12	0.283983	antisense	TRUE
chr4	cg24545054	ENSG00000168743	rs35342250	NPNT	-2.23957	0.456153	9.12258e-07	0.277643	protein_coding	TRUE
chr4	cg26694713	ENSG00000084093	rs57265257	REST	-25.9302	5.19941	6.12818e-07	0.276075	protein_coding	TRUE
chr4	cg22136125	ENSG00000196810	rs4974575	CTBP1-AS2	6.28196	1.27755	8.77915e-07	0.27351	antisense	TRUE
chr4	cg13788212	ENSG00000151552	rs4698607	QDPR	-55.454	10.9764	4.36929e-07	0.273137	protein_coding	TRUE
chr4	cg10652277	ENSG00000014824	rs2581438	SLC30A9	-20.6896	4.00977	2.47209e-07	0.269235	protein_coding	TRUE
chr4	cg12315997	ENSG00000224097	rs10010309	RP11-472B18.1	-0.666168	0.135625	9.02256e-07	0.252249	transcribed_processed_pseudogene	TRUE
chr4	cg19022908	ENSG00000168491	rs4862535	CCDC110	4.43223	0.694451	1.74385e-10	0.252092	protein_coding	TRUE
chr4	cg19539972	ENSG00000173011	rs3796908	TADA2B	-14.6155	2.43138	1.84192e-09	0.25164	protein_coding	TRUE
chr4	cg02292679	ENSG00000056291	rs4694472	NPFFR2	6.03245	0.836376	5.48904e-13	0.245394	protein_coding	TRUE
chr4	cg13943980	ENSG00000251580	rs36102500	RP11-539L10.3	-3.51057	0.64399	5.0008e-08	0.242033	lincRNA	TRUE
chr4	cg12993960	ENSG00000196810	rs6826029	CTBP1-AS2	5.47736	1.09258	5.35192e-07	0.241642	antisense	TRUE
chr4	cg06555230	ENSG00000168743	rs1447093	NPNT	0.736357	0.109332	1.63875e-11	0.241315	protein_coding	TRUE
chr4	cg20887711	ENSG00000090316	rs2293634	MAEA	5.58581	1.11256	5.14857e-07	0.239811	protein_coding	TRUE
chr4	cg16399632	ENSG00000196810	rs6826029	CTBP1-AS2	3.20246	0.588309	5.2245e-08	0.239638	antisense	TRUE
chr4	cg07964006	ENSG00000084092	rs35640834	NOA1	-2.16012	0.350916	7.47643e-10	0.239387	protein_coding	TRUE
chr4	cg11616273	ENSG00000168743	rs28450989	NPNT	2.02806	0.40743	6.43474e-07	0.23933	protein_coding	TRUE
chr4	cg27553217	ENSG00000174125	rs4833093	TLR1	6.88692	1.37487	5.46701e-07	0.238231	protein_coding	TRUE
chr4	cg13036656	ENSG00000242686	rs28569875	RP11-1191J2.2	4.32019	0.743719	6.28838e-09	0.237354	antisense	TRUE
chr4	cg21158361	ENSG00000273247	rs4352420	RP11-83A24.2	3.57041	0.725783	8.68158e-07	0.234822	antisense	TRUE
chr4	cg25799590	ENSG00000138744	rs35170645	NAAA	16.6327	3.3721	8.1208e-07	0.232902	protein_coding	TRUE
chr4	cg17656443	ENSG00000163945	rs199501383	UVSSA	6.55167	1.29615	4.31068e-07	0.231231	protein_coding	TRUE
chr4	cg24386507	ENSG00000182168	rs1971982	UNC5C	-17.1562	3.35665	3.20276e-07	0.231138	protein_coding	TRUE
chr4	cg17939448	ENSG00000272414	rs5859507	FAM47E-STBD1	4.26918	0.672426	2.16828e-10	0.229275	protein_coding	TRUE
chr4	cg04274830	ENSG00000138760	rs12508223	SCARB2	-69.7497	13.6304	3.10048e-07	0.226789	protein_coding	TRUE
chr4	cg01614237	ENSG00000170846	rs4689505	AC093323.3	-2.01611	0.283967	1.24924e-12	0.218428	lincRNA	TRUE
chr4	cg16399632	ENSG00000090316	rs6826029	MAEA	4.6709	0.893543	1.71919e-07	0.216296	protein_coding	TRUE
chr4	cg12414557	ENSG00000178222	rs11510471	RNF212	-0.652047	0.120126	5.69773e-08	0.216002	protein_coding	TRUE
chr4	cg03133975	ENSG00000181381	rs62333773	DDX60L	70.6839	13.7944	2.98934e-07	0.215262	protein_coding	TRUE
chr4	cg16774075	ENSG00000164031	rs11935398	DNAJB14	31.8862	6.04928	1.35631e-07	0.211952	protein_coding	TRUE
chr4	cg03698571	ENSG00000170846	rs13108361	AC093323.3	-5.03383	0.713118	1.67814e-12	0.211471	lincRNA	TRUE
chr4	cg02503808	ENSG00000109519	rs3822269	GRPEL1	-12.3024	1.27188	3.94234e-22	0.210156	protein_coding	TRUE
chr4	cg09748973	ENSG00000090316	rs13145722	MAEA	-5.78875	1.11071	1.87073e-07	0.209193	protein_coding	TRUE
chr4	cg11379377	ENSG00000091490	rs2124652	SEL1L3	43.0207	8.52585	4.51361e-07	0.208588	protein_coding	TRUE
chr4	cg14867455	ENSG00000245958	rs78709015	RP11-33B1.1	-33.7107	3.81013	8.93871e-19	0.207578	transcribed_unprocessed_pseudogene	TRUE
chr4	cg12902983	ENSG00000169762	rs10939652	TAPT1	-80.3346	12.5964	1.79903e-10	0.195441	protein_coding	TRUE
chr4	cg13845366	ENSG00000071205	rs72951426	ARHGAP10	-36.7539	6.01859	1.01698e-09	0.191753	protein_coding	TRUE
chr4	cg10974756	ENSG00000038210	rs5856894	PI4K2B	4.41243	0.713061	6.09302e-10	0.191147	protein_coding	TRUE
chr4	cg13609457	ENSG00000245958	rs368648502	RP11-33B1.1	-41.2997	5.43315	2.92909e-14	0.189131	transcribed_unprocessed_pseudogene	TRUE
chr4	cg02978139	ENSG00000185774	rs10695080	KCNIP4	-6.88762	0.969053	1.18096e-12	0.18752	protein_coding	TRUE
chr4	cg12960369	ENSG00000181381	rs56999040	DDX60L	-30.8613	4.31596	8.64619e-13	0.185382	protein_coding	TRUE
chr4	cg08714767	ENSG00000250317	rs9647441	SMIM20	-15.2039	2.85014	9.58285e-08	0.184317	protein_coding	TRUE
chr4	cg24044084	ENSG00000109572	rs7696352	CLCN3	-27.9906	4.6153	1.32169e-09	0.183361	protein_coding	TRUE
chr4	cg17656443	ENSG00000179979	rs199501383	CRIPAK	12.9365	2.00868	1.19255e-10	0.182842	protein_coding	TRUE
chr4	cg00086871	ENSG00000109519	rs56097119	GRPEL1	20.3484	4.00489	3.75671e-07	0.181338	protein_coding	TRUE
chr4	cg16961536	ENSG00000138741	rs34445121	TRPC3	9.51014	1.82444	1.86185e-07	0.175008	protein_coding	TRUE
chr4	cg00098040	ENSG00000169762	rs317855	TAPT1	-76.8415	9.79235	4.25789e-15	0.172968	protein_coding	TRUE
chr4	cg13466364	ENSG00000137463	rs35911076	MGARP	22.1979	3.17525	2.73122e-12	0.172072	protein_coding	TRUE
chr4	cg12897639	ENSG00000196810	rs71614972	CTBP1-AS2	-5.04875	1.02195	7.79937e-07	0.171497	antisense	TRUE
chr4	cg19027611	ENSG00000109180	rs13142540	OCIAD1	-26.9586	5.02782	8.2359e-08	0.170785	protein_coding	TRUE
chr4	cg13849548	ENSG00000137463	rs67132335	MGARP	33.3678	5.05965	4.25569e-11	0.167729	protein_coding	TRUE
chr4	cg03423497	ENSG00000163682	rs113095112	RPL9	322.648	56.8834	1.4106e-08	0.166885	protein_coding	TRUE
chr4	cg26178657	ENSG00000163293	rs11730132	NIPAL1	-5.22567	0.615757	2.12823e-17	0.166524	protein_coding	TRUE
chr4	cg07964006	ENSG00000084093	rs35640834	REST	-16.5217	2.07005	1.44811e-15	0.165324	protein_coding	TRUE
chr4	cg17010112	ENSG00000272414	rs35334265	FAM47E-STBD1	-5.0878	0.986312	2.49063e-07	0.164334	protein_coding	TRUE
chr4	cg10409131	ENSG00000091490	rs2305669	SEL1L3	11.4381	1.90819	2.04477e-09	0.164014	protein_coding	TRUE
chr4	cg03864958	ENSG00000109667	rs7673788	SLC2A9	-1.77439	0.305532	6.33978e-09	0.160164	protein_coding	TRUE
chr4	cg13943980	ENSG00000170846	rs3214185	AC093323.3	17.7193	3.22158	3.79428e-08	0.155923	lincRNA	TRUE
chr4	cg02466788	ENSG00000151806	rs1491325	GUF1	-1.2464	0.210096	2.98306e-09	0.153344	protein_coding	TRUE
chr4	cg10811039	ENSG00000164039	rs72665054	BDH2	24.5586	4.6624	1.38387e-07	0.146245	protein_coding	TRUE
chr4	cg27132802	ENSG00000134852	rs114571142	CLOCK	15.3642	2.47811	5.64812e-10	0.141621	protein_coding	TRUE
chr4	cg23574427	ENSG00000138741	rs35661893	TRPC3	-2.80928	0.396576	1.40209e-12	0.141444	protein_coding	TRUE
chr4	cg16327276	ENSG00000169762	rs317855	TAPT1	-188.468	37.6866	5.70566e-07	0.141369	protein_coding	TRUE
chr4	cg24881973	ENSG00000170846	rs13108361	AC093323.3	-4.3544	0.604188	5.7191e-13	0.140085	lincRNA	TRUE
chr4	cg13609457	ENSG00000145390	rs368648502	USP53	-5.74773	1.05725	5.43451e-08	0.139944	protein_coding	TRUE
chr4	cg13281248	ENSG00000090316	rs4974545	MAEA	7.24009	1.4576	6.79523e-07	0.135202	protein_coding	TRUE
chr4	cg20444990	ENSG00000242686	rs75012393	RP11-1191J2.2	-6.36851	1.19571	1.00318e-07	0.126374	antisense	TRUE
chr4	cg01962146	ENSG00000179979	rs114081332	CRIPAK	10.1459	1.99727	3.77598e-07	0.126207	protein_coding	TRUE
chr4	cg00220737	ENSG00000183783	rs12502623	KCTD8	-9.27431	1.7185	6.78584e-08	0.124803	protein_coding	TRUE
chr4	cg13030586	ENSG00000109775	rs76384290	UFSP2	76.3918	13.0541	4.85937e-09	0.122434	protein_coding	TRUE
chr4	cg02089348	ENSG00000168936	rs1867923	TMEM129	8.5344	1.62534	1.51411e-07	0.121907	protein_coding	TRUE
chr4	cg14540093	ENSG00000084093	rs35640834	REST	-19.127	2.5966	1.75609e-13	0.117294	protein_coding	TRUE
chr4	cg05629849	ENSG00000272414	rs144905228	FAM47E-STBD1	-4.49144	0.814187	3.45875e-08	0.11097	protein_coding	TRUE
chr4	cg07027075	ENSG00000224097	rs10010309	RP11-472B18.1	-0.753132	0.14958	4.77878e-07	0.10963	transcribed_processed_pseudogene	TRUE
chr4	cg09362608	ENSG00000170846	rs56350728	AC093323.3	-4.75356	0.627007	3.41985e-14	0.106853	lincRNA	TRUE
chr4	cg14559075	ENSG00000145246	rs12651381	ATP10D	-20.8761	3.25786	1.47517e-10	0.10621	protein_coding	TRUE
chr4	cg14867455	ENSG00000145390	rs78709015	USP53	-4.66159	0.790324	3.67197e-09	0.103334	protein_coding	TRUE
chr4	cg02503808	ENSG00000173011	rs3822269	TADA2B	-9.1521	1.41493	9.91634e-11	0.102676	protein_coding	TRUE
chr4	cg08460358	ENSG00000137463	rs34989554	MGARP	30.4157	5.903	2.56916e-07	0.0991995	protein_coding	TRUE
chr4	cg19120985	ENSG00000281501	rs62411565	SEPSECS-AS1	2.60441	0.266064	1.2596e-22	0.0964882	antisense	TRUE
chr4	cg04683119	ENSG00000272936	rs7663750	RP11-700J17.2	1.64479	0.249016	3.97067e-11	0.0951035	antisense	TRUE
chr4	cg03841832	ENSG00000109667	rs4622999	SLC2A9	5.9481	0.737666	7.41944e-16	0.0946085	protein_coding	TRUE
chr4	cg10932140	ENSG00000090316	rs4974577	MAEA	5.8415	1.07988	6.32451e-08	0.0917943	protein_coding	TRUE
chr4	cg26479374	ENSG00000090316	rs2199956	MAEA	3.73608	0.625966	2.39433e-09	0.0904339	protein_coding	TRUE
chr4	cg04462898	ENSG00000245958	rs10212714	RP11-33B1.1	-61.0409	10.3324	3.46919e-09	0.0879176	transcribed_unprocessed_pseudogene	TRUE
chr4	cg12396412	ENSG00000071205	rs116429035	ARHGAP10	-44.5286	7.75337	9.2942e-09	0.085906	protein_coding	TRUE
chr4	cg23734768	ENSG00000251022	rs13136390	THAP9-AS1	-5.3319	0.625605	1.5575e-17	0.0853246	antisense	TRUE
chr4	cg00595051	ENSG00000251022	rs13137759	THAP9-AS1	13.9894	2.02126	4.48022e-12	0.0848264	antisense	TRUE
chr4	cg13110555	ENSG00000150627	rs36008793	WDR17	-36.5011	4.01648	1.01017e-19	0.0833025	protein_coding	TRUE
chr4	cg21158361	ENSG00000137463	rs4352420	MGARP	-34.2568	6.35865	7.14731e-08	0.0827841	protein_coding	TRUE
chr4	cg10676327	ENSG00000251580	rs73211706	RP11-539L10.3	0.838551	0.151431	3.06823e-08	0.0808484	lincRNA	TRUE
chr4	cg04772620	ENSG00000163110	rs2452561	PDLIM5	-6.27441	0.707643	7.53872e-19	0.0807638	protein_coding	TRUE
chr4	cg08452528	ENSG00000178222	rs935968	RNF212	0.600022	0.108339	3.05318e-08	0.0798085	protein_coding	TRUE
chr4	cg12109838	ENSG00000164039	rs12508269	BDH2	5.78912	1.10353	1.55457e-07	0.0765563	protein_coding	TRUE
chr4	cg12468008	ENSG00000182168	rs9993649	UNC5C	-10.3514	1.75817	3.9179e-09	0.0761409	protein_coding	TRUE
chr4	cg04863758	ENSG00000196810	rs2293633	CTBP1-AS2	5.30442	1.04865	4.22958e-07	0.0737473	antisense	TRUE
chr4	cg08018825	ENSG00000250317	rs6841648	SMIM20	-17.4586	3.47641	5.11305e-07	0.0706484	protein_coding	TRUE
chr4	cg04306053	ENSG00000251022	rs11737784	THAP9-AS1	12.021	1.68969	1.12447e-12	0.0697898	antisense	TRUE
chr4	cg20887711	ENSG00000196810	rs4974614	CTBP1-AS2	2.84198	0.535682	1.12455e-07	0.0689271	antisense	TRUE
chr4	cg11379377	ENSG00000250317	rs2124652	SMIM20	11.1413	2.20273	4.23815e-07	0.0681386	protein_coding	TRUE
chr4	cg04703765	ENSG00000196810	rs3834218	CTBP1-AS2	4.90945	0.946642	2.14661e-07	0.0676589	antisense	TRUE
chr4	cg00260715	ENSG00000164039	rs150183057	BDH2	8.49701	1.27414	2.57855e-11	0.0652538	protein_coding	TRUE
chr4	cg03096285	ENSG00000196810	rs11735340	CTBP1-AS2	4.97093	0.968318	2.84297e-07	0.0652389	antisense	TRUE
chr4	cg24843443	ENSG00000181381	rs56999040	DDX60L	-29.8854	4.1929	1.02122e-12	0.0641713	protein_coding	TRUE
chr4	cg12244133	ENSG00000150627	rs36008793	WDR17	-40.8715	4.47734	6.94498e-20	0.0637834	protein_coding	TRUE
chr4	cg10309005	ENSG00000145476	rs4253327	CYP4V2	-59.8429	10.5764	1.53029e-08	0.0627791	protein_coding	TRUE
chr4	cg02207086	ENSG00000164323	rs2030800	CFAP97	-43.1495	7.14175	1.52341e-09	0.0594654	protein_coding	TRUE
chr4	cg20488107	ENSG00000169762	rs317900	TAPT1	-62.3202	9.34132	2.53275e-11	0.0591518	protein_coding	TRUE
chr4	cg12912255	ENSG00000174780	rs112046315	SRP72	-12.9672	2.51501	2.5235e-07	0.0578749	protein_coding	TRUE
chr4	cg25186802	ENSG00000109667	rs4697716	SLC2A9	3.1956	0.546472	4.98437e-09	0.0564729	protein_coding	TRUE
chr4	cg03640051	ENSG00000124406	rs1460357	ATP8A1	-67.9981	8.28243	2.21319e-16	0.056136	protein_coding	TRUE
chr4	cg17280671	ENSG00000124406	rs10008642	ATP8A1	-135.699	24.512	3.09408e-08	0.053348	protein_coding	TRUE
chr4	cg05861031	ENSG00000272414	rs1912833	FAM47E-STBD1	-4.98343	0.919897	6.04793e-08	0.0519707	protein_coding	TRUE
chr4	cg21136789	ENSG00000174780	rs58872126	SRP72	-13.8692	2.40421	7.98779e-09	0.0510437	protein_coding	TRUE
chr4	cg25897951	ENSG00000090316	rs3775092	MAEA	3.72079	0.653548	1.24664e-08	0.0504943	protein_coding	TRUE
chr5	cg26500016	ENSG00000164292	rs7717280	RHOBTB3	-128.146	25.1811	3.60035e-07	0.997524	protein_coding	TRUE
chr5	cg13944838	ENSG00000050748	rs55901738	MAPK9	-2.45622	0.295765	1.00124e-16	0.986552	protein_coding	TRUE
chr5	cg23522475	ENSG00000164292	rs12153333	RHOBTB3	-112.645	18.2477	6.69757e-10	0.986162	protein_coding	TRUE
chr5	cg23221052	ENSG00000050748	rs55901738	MAPK9	-2.18653	0.260307	4.47123e-17	0.984741	protein_coding	TRUE
chr5	cg17317391	ENSG00000164404	rs30179	GDF9	-2.51934	0.490449	2.79436e-07	0.983477	protein_coding	TRUE
chr5	cg09728489	ENSG00000113368	rs6867793	LMNB1	-10.1105	1.69405	2.39774e-09	0.980975	protein_coding	TRUE
chr5	cg02560085	ENSG00000204961	rs62624460	PCDHA9	0.731419	0.124096	3.77002e-09	0.979988	protein_coding	TRUE
chr5	cg25476565	ENSG00000164904	rs900641	ALDH7A1	-21.8517	3.2885	3.03457e-11	0.966076	protein_coding	TRUE
chr5	cg03655389	ENSG00000171368	rs72707023	TPPP	-11.243	2.12547	1.2253e-07	0.961929	protein_coding	TRUE
chr5	cg12532266	ENSG00000164404	rs30179	GDF9	-1.9392	0.358474	6.31649e-08	0.961463	protein_coding	TRUE
chr5	cg10549338	ENSG00000171368	rs72707023	TPPP	-17.9181	3.06164	4.8435e-09	0.955517	protein_coding	TRUE
chr5	cg26502783	ENSG00000044115	rs113854507	CTNNA1	-57.9522	9.86374	4.22145e-09	0.955092	protein_coding	TRUE
chr5	cg01389287	ENSG00000164292	rs34900	RHOBTB3	-135.526	23.71	1.09059e-08	0.952323	protein_coding	TRUE
chr5	cg06451302	ENSG00000164308	rs11135485	ERAP2	25.1022	4.78989	1.60003e-07	0.950545	protein_coding	TRUE
chr5	cg12516565	ENSG00000131711	rs72761109	MAP1B	-2318.34	418.159	2.95387e-08	0.946893	protein_coding	TRUE
chr5	cg02891314	ENSG00000050748	rs55901738	MAPK9	-1.44463	0.161433	3.59445e-19	0.944728	protein_coding	TRUE
chr5	cg23518039	ENSG00000253406	rs2918267	AC012613.2	13.0044	1.64113	2.29944e-15	0.944278	antisense	TRUE
chr5	cg23248424	ENSG00000050748	rs55901738	MAPK9	-1.47166	0.166957	1.20101e-18	0.92842	protein_coding	TRUE
chr5	cg17593055	ENSG00000253406	rs1866375	AC012613.2	34.8317	6.74254	2.39197e-07	0.921779	antisense	TRUE
chr5	cg17532812	ENSG00000044115	rs7724633	CTNNA1	-44.4298	8.70035	3.27887e-07	0.917703	protein_coding	TRUE
chr5	cg15470457	ENSG00000113645	rs10866628	WWC1	81.2776	14.0795	7.79835e-09	0.915189	protein_coding	TRUE
chr5	cg03983890	ENSG00000169045	rs6895677	HNRNPH1	-629.887	110.397	1.15882e-08	0.912978	protein_coding	TRUE
chr5	cg04284063	ENSG00000113368	rs7729845	LMNB1	-9.63807	1.78403	6.57557e-08	0.911066	protein_coding	TRUE
chr5	cg02326566	ENSG00000204961	rs114075983	PCDHA9	0.942169	0.164548	1.02952e-08	0.908988	protein_coding	TRUE
chr5	cg09817018	ENSG00000251141	rs34704720	RP11-53O19.1	-4.22213	0.645479	6.10742e-11	0.900082	antisense	TRUE
chr5	cg00344527	ENSG00000164404	rs254286	GDF9	2.72513	0.454657	2.0498e-09	0.898427	protein_coding	TRUE
chr5	cg00398248	ENSG00000213523	rs778585	SRA1	7.1333	1.41576	4.69211e-07	0.893292	protein_coding	TRUE
chr5	cg20362242	ENSG00000171368	rs76677870	TPPP	11.0222	2.16057	3.36939e-07	0.888663	protein_coding	TRUE
chr5	cg00716870	ENSG00000131507	rs13188700	NDFIP1	-131.461	17.4832	5.50872e-14	0.88276	protein_coding	TRUE
chr5	cg05389183	ENSG00000061455	rs13189568	PRDM6	-1.63405	0.301228	5.80742e-08	0.862897	protein_coding	TRUE
chr5	cg14649252	ENSG00000174136	rs2250807	RGMB	-4.56931	0.887648	2.63749e-07	0.861313	protein_coding	TRUE
chr5	cg02688752	ENSG00000164251	rs4380630	F2RL1	-4.67698	0.923528	4.10008e-07	0.860664	protein_coding	TRUE
chr5	cg11445191	ENSG00000239389	rs251365	PCDHA13	-16.3476	3.14038	1.93364e-07	0.854617	protein_coding	TRUE
chr5	cg04869206	ENSG00000164327	rs35476737	RICTOR	112.622	18.378	8.89406e-10	0.848398	protein_coding	TRUE
chr5	cg15325397	ENSG00000154122	rs35088258	ANKH	-47.2528	8.92024	1.17552e-07	0.848303	protein_coding	TRUE
chr5	cg00275741	ENSG00000239389	rs370307660	PCDHA13	-7.8825	1.03987	3.44827e-14	0.844593	protein_coding	TRUE
chr5	cg23260877	ENSG00000050748	rs75050499	MAPK9	-12.0362	1.86225	1.025e-10	0.841471	protein_coding	TRUE
chr5	cg04313788	ENSG00000186468	rs226203	RPS23	79.3918	8.03928	5.31712e-23	0.836374	protein_coding	TRUE
chr5	cg02560085	ENSG00000250120	rs62624460	PCDHA10	6.42474	0.767939	5.94967e-17	0.834432	protein_coding	TRUE
chr5	cg06307176	ENSG00000158987	rs11315485	RAPGEF6	-15.1032	3.02193	5.79714e-07	0.832037	protein_coding	TRUE
chr5	cg20260921	ENSG00000113240	rs576097	CLK4	130.121	24.4625	1.04234e-07	0.829778	protein_coding	TRUE
chr5	cg14579239	ENSG00000204961	rs62624460	PCDHA9	0.964904	0.17096	1.66121e-08	0.828547	protein_coding	TRUE
chr5	cg07195319	ENSG00000113645	rs35168203	WWC1	-62.1624	9.87065	3.02096e-10	0.827995	protein_coding	TRUE
chr5	cg03169021	ENSG00000251664	rs155813	PCDHA12	1.06637	0.18994	1.97405e-08	0.827013	protein_coding	TRUE
chr5	cg01429387	ENSG00000113368	rs201346345	LMNB1	-5.26006	0.917498	9.86432e-09	0.825757	protein_coding	TRUE
chr5	cg26556719	ENSG00000251664	rs155807	PCDHA12	2.60864	0.500684	1.88699e-07	0.825016	protein_coding	TRUE
chr5	cg21450108	ENSG00000204961	rs62624460	PCDHA9	-0.658229	0.121467	5.99387e-08	0.816502	protein_coding	TRUE
chr5	cg16319118	ENSG00000164292	rs34894	RHOBTB3	-97.5929	18.3692	1.07915e-07	0.788803	protein_coding	TRUE
chr5	cg01993799	ENSG00000247679	rs62398474	RP11-1277A3.1	1.63905	0.326355	5.10626e-07	0.788137	antisense	TRUE
chr5	cg03946339	ENSG00000039123	rs7719928	SKIV2L2	-30.191	5.92841	3.53178e-07	0.78597	protein_coding	TRUE
chr5	cg02699218	ENSG00000164404	rs57136098	GDF9	-3.51003	0.712602	8.40775e-07	0.78565	protein_coding	TRUE
chr5	cg25754158	ENSG00000204961	rs62624460	PCDHA9	-0.515864	0.0948071	5.29248e-08	0.761015	protein_coding	TRUE
chr5	cg01795789	ENSG00000249158	rs62624460	PCDHA11	1.9828	0.383374	2.31639e-07	0.756772	protein_coding	TRUE
chr5	cg06539116	ENSG00000253406	rs2963489	AC012613.2	-27.1809	3.7313	3.22702e-13	0.755491	antisense	TRUE
chr5	cg25408093	ENSG00000197043	rs367332	ANXA6	-99.7965	16.2123	7.4801e-10	0.748582	protein_coding	TRUE
chr5	cg25967418	ENSG00000251664	rs155807	PCDHA12	2.30303	0.462359	6.32455e-07	0.742888	protein_coding	TRUE
chr5	cg09163745	ENSG00000164398	rs168681	ACSL6	-113.231	23.043	8.9292e-07	0.742127	protein_coding	TRUE
chr5	cg12791433	ENSG00000168938	rs36180885	PPIC	-5.63744	0.938396	1.88369e-09	0.739483	protein_coding	TRUE
chr5	cg23522475	ENSG00000251348	rs12153333	HSPD1P11	-1.03616	0.207385	5.84356e-07	0.738416	processed_pseudogene	TRUE
chr5	cg08537845	ENSG00000113645	rs2003850	WWC1	-27.5912	3.0765	3.00941e-19	0.738237	protein_coding	TRUE
chr5	cg04634417	ENSG00000250120	rs62624460	PCDHA10	4.52604	0.487549	1.64384e-20	0.733428	protein_coding	TRUE
chr5	cg18060909	ENSG00000197043	rs2346026	ANXA6	-56.9369	9.06063	3.29984e-10	0.725717	protein_coding	TRUE
chr5	cg14579239	ENSG00000250120	rs62624460	PCDHA10	8.47566	1.10161	1.42758e-14	0.705243	protein_coding	TRUE
chr5	cg01037165	ENSG00000171368	rs76677870	TPPP	12.113	2.22254	5.03549e-08	0.692261	protein_coding	TRUE
chr5	cg08798269	ENSG00000044115	rs138837955	CTNNA1	-58.0494	10.861	9.05395e-08	0.686581	protein_coding	TRUE
chr5	cg27247993	ENSG00000170464	rs3923059	DNAJC18	-22.7636	2.77239	2.19727e-16	0.685979	protein_coding	TRUE
chr5	cg11190754	ENSG00000197860	rs75179968	SGTB	-19.0077	3.78925	5.26971e-07	0.667837	protein_coding	TRUE
chr5	cg24531977	ENSG00000155542	rs11326963	SETD9	-1.40514	0.117006	3.18232e-33	0.651267	protein_coding	TRUE
chr5	cg21377673	ENSG00000129596	rs34869	CDO1	-6.70098	1.13796	3.89546e-09	0.646234	protein_coding	TRUE
chr5	cg03127127	ENSG00000113240	rs687110	CLK4	-167.821	19.3865	4.86142e-18	0.642996	protein_coding	TRUE
chr5	cg23932782	ENSG00000249158	rs62624460	PCDHA11	2.00377	0.403182	6.69941e-07	0.635541	protein_coding	TRUE
chr5	cg03169021	ENSG00000239389	rs155813	PCDHA13	-4.04909	0.448617	1.78515e-19	0.633309	protein_coding	TRUE
chr5	cg19596110	ENSG00000249158	rs62624460	PCDHA11	-4.12054	0.840018	9.32859e-07	0.633304	protein_coding	TRUE
chr5	cg19412675	ENSG00000064652	rs12518979	SNX24	-10.7113	1.84881	6.88881e-09	0.632739	protein_coding	TRUE
chr5	cg25555059	ENSG00000113396	rs145370396	SLC27A6	19.9204	3.75104	1.09249e-07	0.629793	protein_coding	TRUE
chr5	cg22547559	ENSG00000164904	rs34450389	ALDH7A1	-28.1413	3.41479	1.70758e-16	0.628582	protein_coding	TRUE
chr5	cg02736230	ENSG00000180104	rs3815928	EXOC3	27.124	5.27988	2.78796e-07	0.628411	protein_coding	TRUE
chr5	cg02326566	ENSG00000250120	rs114075983	PCDHA10	8.42279	1.05729	1.63392e-15	0.597742	protein_coding	TRUE
chr5	cg12791433	ENSG00000061455	rs36180885	PRDM6	-2.09398	0.387135	6.34059e-08	0.595895	protein_coding	TRUE
chr5	cg04424244	ENSG00000113140	rs17718324	SPARC	-221.326	34.3437	1.16032e-10	0.585475	protein_coding	TRUE
chr5	cg17652792	ENSG00000272674	rs17844646	PCDHB16	-4.02629	0.7491	7.66526e-08	0.583552	protein_coding	TRUE
chr5	cg05389183	ENSG00000168938	rs13189568	PPIC	-4.10241	0.692352	3.11701e-09	0.577272	protein_coding	TRUE
chr5	cg20930537	ENSG00000133706	rs140796536	LARS	-22.9722	3.64766	3.01919e-10	0.577162	protein_coding	TRUE
chr5	cg11649167	ENSG00000253406	rs13161048	AC012613.2	21.6047	3.88629	2.70974e-08	0.570923	antisense	TRUE
chr5	cg25875191	ENSG00000169220	rs10051765	RGS14	-1.01846	0.109061	9.78001e-21	0.567614	protein_coding	TRUE
chr5	cg09817018	ENSG00000272335	rs34704720	RP11-53O19.3	-7.557	1.32884	1.29351e-08	0.560802	lincRNA	TRUE
chr5	cg15911328	ENSG00000272674	rs11321809	PCDHB16	3.45238	0.527559	5.98695e-11	0.559898	protein_coding	TRUE
chr5	cg22727565	ENSG00000250120	rs2262573	PCDHA10	-12.1389	2.46536	8.48838e-07	0.559549	protein_coding	TRUE
chr5	cg25026992	ENSG00000272674	rs246717	PCDHB16	-3.04124	0.619151	9.01699e-07	0.541767	protein_coding	TRUE
chr5	cg13011109	ENSG00000188573	rs35505145	FBLL1	-3.67261	0.535414	6.91578e-12	0.529332	protein_coding	TRUE
chr5	cg19412675	ENSG00000168938	rs12518979	PPIC	-10.2586	1.55321	3.98134e-11	0.523528	protein_coding	TRUE
chr5	cg01202150	ENSG00000249158	rs370307660	PCDHA11	5.04839	0.899751	2.01304e-08	0.518321	protein_coding	TRUE
chr5	cg25279509	ENSG00000164331	rs2703634	ANKRA2	5.08638	0.954458	9.87134e-08	0.517728	protein_coding	TRUE
chr5	cg06539046	ENSG00000113140	rs17718324	SPARC	-114.132	16.3064	2.57328e-12	0.517374	protein_coding	TRUE
chr5	cg01795789	ENSG00000204961	rs62624460	PCDHA9	-0.877693	0.174128	4.64341e-07	0.516356	protein_coding	TRUE
chr5	cg19551232	ENSG00000164904	rs56397023	ALDH7A1	51.3009	8.52278	1.7521e-09	0.515979	protein_coding	TRUE
chr5	cg23434998	ENSG00000083720	rs12186512	OXCT1	-24.2178	4.04554	2.1469e-09	0.510371	protein_coding	TRUE
chr5	cg11268983	ENSG00000239389	rs370307660	PCDHA13	-12.2144	2.25024	5.69769e-08	0.506878	protein_coding	TRUE
chr5	cg01202150	ENSG00000272674	rs370307660	PCDHB16	3.93684	0.789408	6.13014e-07	0.500869	protein_coding	TRUE
chr5	cg19097359	ENSG00000113593	rs33395	PPWD1	-7.01977	0.937268	6.90766e-14	0.497154	protein_coding	TRUE
chr5	cg00275741	ENSG00000249158	rs370307660	PCDHA11	3.2442	0.506857	1.54746e-10	0.494708	protein_coding	TRUE
chr5	cg24250168	ENSG00000180104	rs4334924	EXOC3	-16.1493	2.82316	1.06344e-08	0.494522	protein_coding	TRUE
chr5	cg21915770	ENSG00000049883	rs246562	PTCD2	-23.7287	4.35219	4.97673e-08	0.490754	protein_coding	TRUE
chr5	cg19394562	ENSG00000113645	rs10077631	WWC1	-32.4761	4.00959	5.5142e-16	0.488912	protein_coding	TRUE
chr5	cg00275741	ENSG00000272674	rs370307660	PCDHB16	2.52989	0.458551	3.44557e-08	0.474963	protein_coding	TRUE
chr5	cg16624210	ENSG00000171368	rs56298737	TPPP	12.3456	2.2358	3.35581e-08	0.473049	protein_coding	TRUE
chr5	cg26556719	ENSG00000239389	rs155807	PCDHA13	-10.1909	1.27832	1.55954e-15	0.468262	protein_coding	TRUE
chr5	cg03195826	ENSG00000233006	rs166635	AC034220.3	-8.92691	1.56618	1.19938e-08	0.467165	processed_transcript	TRUE
chr5	cg18668511	ENSG00000120322	rs17844646	PCDHB8	-0.513598	0.100787	3.47082e-07	0.461862	protein_coding	TRUE
chr5	cg22051204	ENSG00000132846	rs2914140	ZBED3	-4.67021	0.902286	2.26731e-07	0.459315	protein_coding	TRUE
chr5	cg25279509	ENSG00000164338	rs2703634	UTP15	3.32509	0.673737	8.00284e-07	0.458636	protein_coding	TRUE
chr5	cg07915631	ENSG00000113645	rs7723533	WWC1	-64.0696	12.3808	2.28016e-07	0.45737	protein_coding	TRUE
chr5	cg25754158	ENSG00000249158	rs62624460	PCDHA11	1.16539	0.20782	2.05062e-08	0.442247	protein_coding	TRUE
chr5	cg24962528	ENSG00000184840	rs11537644	TMED9	8.93648	1.53747	6.15653e-09	0.439585	protein_coding	TRUE
chr5	cg12311346	ENSG00000155542	rs2591963	SETD9	-2.24399	0.198326	1.11077e-29	0.438087	protein_coding	TRUE
chr5	cg14541582	ENSG00000171368	rs72703080	TPPP	-22.9081	4.42364	2.23593e-07	0.435767	protein_coding	TRUE
chr5	cg01993799	ENSG00000204677	rs62398474	FAM153C	-2.19371	0.4143	1.19028e-07	0.435146	protein_coding	TRUE
chr5	cg03653511	ENSG00000246596	rs34582406	RP11-1277A3.2	3.37786	0.672086	5.00963e-07	0.432634	transcribed_unprocessed_pseudogene	TRUE
chr5	cg04876839	ENSG00000113389	rs36040814	NPR3	-5.08628	0.961633	1.22846e-07	0.432194	protein_coding	TRUE
chr5	cg24962528	ENSG00000246596	rs11537644	RP11-1277A3.2	3.11377	0.577098	6.83096e-08	0.430445	transcribed_unprocessed_pseudogene	TRUE
chr5	cg01256539	ENSG00000184838	rs7733602	PRR16	5.1854	0.919409	1.70115e-08	0.430174	protein_coding	TRUE
chr5	cg03725293	ENSG00000113240	rs687110	CLK4	-102.591	17.128	2.10256e-09	0.421987	protein_coding	TRUE
chr5	cg17927236	ENSG00000247828	rs768705	TMEM161B-AS1	19.9378	3.41301	5.16684e-09	0.417228	antisense	TRUE
chr5	cg11046421	ENSG00000272335	rs200929182	RP11-53O19.3	-10.3491	1.65502	4.0226e-10	0.414611	lincRNA	TRUE
chr5	cg19876814	ENSG00000272674	rs200797202	PCDHB16	3.47863	0.703393	7.59487e-07	0.414004	protein_coding	TRUE
chr5	cg21474247	ENSG00000158987	rs687816	RAPGEF6	-9.00262	1.48645	1.39156e-09	0.413766	protein_coding	TRUE
chr5	cg17347828	ENSG00000280047	rs13188700	CTC-463A16.1	-4.7985	0.964976	6.60399e-07	0.413508	TEC	TRUE
chr5	cg00976097	ENSG00000180104	rs2278253	EXOC3	13.8772	2.75076	4.53859e-07	0.412965	protein_coding	TRUE
chr5	cg05189291	ENSG00000113272	rs150451789	THG1L	1.22703	0.23441	1.65396e-07	0.410381	protein_coding	TRUE
chr5	cg07644368	ENSG00000129596	rs26535	CDO1	-4.86679	0.845523	8.61566e-09	0.404894	protein_coding	TRUE
chr5	cg04634417	ENSG00000204961	rs62624460	PCDHA9	0.515263	0.0832479	6.03532e-10	0.404141	protein_coding	TRUE
chr5	cg11598255	ENSG00000169220	rs10051765	RGS14	-1.12841	0.125382	2.26098e-19	0.403476	protein_coding	TRUE
chr5	cg11600721	ENSG00000164331	rs1220627	ANKRA2	-8.83775	1.31268	1.66651e-11	0.399873	protein_coding	TRUE
chr5	cg16549809	ENSG00000164587	rs12186649	RPS14	-153.193	26.4869	7.30644e-09	0.397324	protein_coding	TRUE
chr5	cg02865165	ENSG00000272335	rs1438827	RP11-53O19.3	-5.46725	0.892914	9.18677e-10	0.394662	lincRNA	TRUE
chr5	cg16624210	ENSG00000225138	rs56298737	CTD-2228K2.7	8.49757	1.63966	2.18899e-07	0.390225	processed_transcript	TRUE
chr5	cg26750594	ENSG00000129595	rs6594570	EPB41L4A	25.3977	4.84909	1.62657e-07	0.390195	protein_coding	TRUE
chr5	cg19504301	ENSG00000133706	rs55869117	LARS	15.5041	2.5097	6.50561e-10	0.387024	protein_coding	TRUE
chr5	cg21450108	ENSG00000249158	rs62624460	PCDHA11	1.48701	0.266328	2.35897e-08	0.38217	protein_coding	TRUE
chr5	cg05689600	ENSG00000164904	rs150962000	ALDH7A1	-19.2559	3.77611	3.40711e-07	0.381735	protein_coding	TRUE
chr5	cg25241684	ENSG00000239389	rs3776121	PCDHA13	-25.4438	4.84663	1.52268e-07	0.377453	protein_coding	TRUE
chr5	cg01181940	ENSG00000225138	rs72702707	CTD-2228K2.7	12.8052	2.56084	5.72152e-07	0.372276	processed_transcript	TRUE
chr5	cg27316798	ENSG00000154122	rs835153	ANKH	-32.3201	4.29705	5.41646e-14	0.363171	protein_coding	TRUE
chr5	cg23450373	ENSG00000239389	rs1606122	PCDHA13	14.6406	2.7525	1.04334e-07	0.360894	protein_coding	TRUE
chr5	cg01295188	ENSG00000180104	rs10475262	EXOC3	8.28772	1.57444	1.41021e-07	0.3578	protein_coding	TRUE
chr5	cg26303737	ENSG00000164574	rs6883578	GALNT10	-6.22947	1.22065	3.33627e-07	0.35356	protein_coding	TRUE
chr5	cg06702643	ENSG00000113645	rs12055261	WWC1	-68.2932	12.1642	1.97387e-08	0.352363	protein_coding	TRUE
chr5	cg02051771	ENSG00000249158	rs370307660	PCDHA11	4.98583	0.9121	4.59485e-08	0.346412	protein_coding	TRUE
chr5	cg10505630	ENSG00000113140	rs17718324	SPARC	-102.366	11.8117	4.45594e-18	0.340211	protein_coding	TRUE
chr5	cg11792786	ENSG00000154122	rs835153	ANKH	-15.2706	1.89373	7.39788e-16	0.338531	protein_coding	TRUE
chr5	cg01470457	ENSG00000239389	rs11167645	PCDHA13	-33.2581	6.7552	8.50841e-07	0.333702	protein_coding	TRUE
chr5	cg23518039	ENSG00000173210	rs2918267	ABLIM3	-29.6038	6.00042	8.07187e-07	0.33219	protein_coding	TRUE
chr5	cg08765317	ENSG00000113645	rs2003850	WWC1	-26.6869	3.02156	1.02676e-18	0.329621	protein_coding	TRUE
chr5	cg22109708	ENSG00000164404	rs11748063	GDF9	2.05961	0.391141	1.39685e-07	0.324037	protein_coding	TRUE
chr5	cg14435583	ENSG00000171444	rs13355742	MCC	-13.5021	2.68192	4.79112e-07	0.320068	protein_coding	TRUE
chr5	cg03915372	ENSG00000272674	rs17844646	PCDHB16	4.7526	0.822687	7.60807e-09	0.31669	protein_coding	TRUE
chr5	cg12595026	ENSG00000153395	rs6894340	LPCAT1	70.0433	13.4503	1.91353e-07	0.309484	protein_coding	TRUE
chr5	cg27390840	ENSG00000184347	rs10866632	SLIT3	10.1562	1.37323	1.40503e-13	0.304636	protein_coding	TRUE
chr5	cg15851066	ENSG00000250120	rs62624460	PCDHA10	-11.1069	1.96895	1.69028e-08	0.298151	protein_coding	TRUE
chr5	cg02865165	ENSG00000251141	rs1438827	RP11-53O19.1	-3.04182	0.421832	5.5553e-13	0.292961	antisense	TRUE
chr5	cg23246802	ENSG00000164587	rs10055975	RPS14	-104.067	17.3641	2.05721e-09	0.289174	protein_coding	TRUE
chr5	cg11046421	ENSG00000251141	rs200929182	RP11-53O19.1	-5.85522	0.779572	5.87573e-14	0.287621	antisense	TRUE
chr5	cg20970845	ENSG00000249158	rs11167645	PCDHA11	5.39308	1.04585	2.51401e-07	0.286911	protein_coding	TRUE
chr5	cg07708729	ENSG00000164181	rs34611	ELOVL7	-15.5952	2.34547	2.94942e-11	0.285536	protein_coding	TRUE
chr5	cg26210449	ENSG00000050748	rs3749791	MAPK9	-14.5068	2.82286	2.76147e-07	0.284904	protein_coding	TRUE
chr5	cg05808399	ENSG00000113593	rs11411763	PPWD1	-13.9558	2.32897	2.06906e-09	0.28482	protein_coding	TRUE
chr5	cg06795995	ENSG00000155542	rs185220	SETD9	-4.20767	0.713733	3.7401e-09	0.282207	protein_coding	TRUE
chr5	cg19097359	ENSG00000113597	rs33395	TRAPPC13	-4.45658	0.805558	3.16079e-08	0.28083	protein_coding	TRUE
chr5	cg15871215	ENSG00000152348	rs370637760	ATG10	-5.71456	1.06264	7.54487e-08	0.277893	protein_coding	TRUE
chr5	cg01202150	ENSG00000239389	rs370307660	PCDHA13	-12.2662	1.93005	2.07927e-10	0.275852	protein_coding	TRUE
chr5	cg06060754	ENSG00000169220	rs56235845	RGS14	-1.54248	0.21157	3.08436e-13	0.272683	protein_coding	TRUE
chr5	cg19876814	ENSG00000204961	rs200797202	PCDHA9	-1.6237	0.325216	5.95464e-07	0.267032	protein_coding	TRUE
chr5	cg03653511	ENSG00000184840	rs34582406	TMED9	9.96476	1.83552	5.67159e-08	0.266465	protein_coding	TRUE
chr5	cg05015628	ENSG00000164327	rs13184911	RICTOR	-88.0808	11.8115	8.83669e-14	0.266037	protein_coding	TRUE
chr5	cg08523384	ENSG00000131507	rs4912621	NDFIP1	-72.783	10.8947	2.38019e-11	0.261318	protein_coding	TRUE
chr5	cg12205435	ENSG00000170464	rs10063949	DNAJC18	-27.0934	4.76351	1.28769e-08	0.25811	protein_coding	TRUE
chr5	cg24151027	ENSG00000245556	rs4530741	SCAMP1-AS1	-3.54864	0.71815	7.75771e-07	0.256497	lincRNA	TRUE
chr5	cg12654349	ENSG00000155542	rs77112307	SETD9	-1.17943	0.121038	1.95161e-22	0.252817	protein_coding	TRUE
chr5	cg02051771	ENSG00000239389	rs370307660	PCDHA13	-12.1142	1.97057	7.86931e-10	0.252713	protein_coding	TRUE
chr5	cg15871215	ENSG00000186468	rs370637760	RPS23	152.807	27.5392	2.87764e-08	0.250915	protein_coding	TRUE
chr5	cg02684731	ENSG00000133706	rs55869117	LARS	22.3206	4.25189	1.52451e-07	0.249946	protein_coding	TRUE
chr5	cg17801930	ENSG00000155542	rs4700444	SETD9	-4.8369	0.885996	4.78054e-08	0.247456	protein_coding	TRUE
chr5	cg20132375	ENSG00000153395	rs4292484	LPCAT1	41.6167	8.11871	2.9592e-07	0.245201	protein_coding	TRUE
chr5	cg03195826	ENSG00000197375	rs166635	SLC22A5	-15.2576	2.69107	1.43029e-08	0.243646	protein_coding	TRUE
chr5	cg08870741	ENSG00000113597	rs43207	TRAPPC13	-5.02461	0.92998	6.55654e-08	0.23995	protein_coding	TRUE
chr5	cg03169021	ENSG00000249158	rs155813	PCDHA11	1.71047	0.230856	1.27002e-13	0.238247	protein_coding	TRUE
chr5	cg26514430	ENSG00000250120	rs77020201	PCDHA10	22.7789	4.05924	2.00433e-08	0.23319	protein_coding	TRUE
chr5	cg21450108	ENSG00000250120	rs62624460	PCDHA10	-5.78185	0.808521	8.60608e-13	0.232233	protein_coding	TRUE
chr5	cg11268983	ENSG00000249158	rs370307660	PCDHA11	5.02707	1.01724	7.73698e-07	0.229943	protein_coding	TRUE
chr5	cg18365421	ENSG00000164404	rs4266393	GDF9	1.41125	0.248877	1.42421e-08	0.229322	protein_coding	TRUE
chr5	cg15871215	ENSG00000205464	rs370637760	ATP6AP1L	-12.28	2.23632	3.99365e-08	0.229152	protein_coding	TRUE
chr5	cg18489195	ENSG00000272674	rs799833	PCDHB16	-4.37962	0.630424	3.72871e-12	0.219513	protein_coding	TRUE
chr5	cg27543327	ENSG00000173210	rs7714706	ABLIM3	-19.2256	3.66604	1.56929e-07	0.218198	protein_coding	TRUE
chr5	cg23577948	ENSG00000164404	rs4705969	GDF9	1.28313	0.238465	7.41613e-08	0.214247	protein_coding	TRUE
chr5	cg01294811	ENSG00000171421	rs4975735	MRPL36	0.984522	0.192592	3.18836e-07	0.212587	protein_coding	TRUE
chr5	cg21483461	ENSG00000205464	rs4703538	ATP6AP1L	-8.95621	1.54487	6.73638e-09	0.209161	protein_coding	TRUE
chr5	cg10549338	ENSG00000225138	rs72707023	CTD-2228K2.7	-10.4861	2.09324	5.45734e-07	0.205388	processed_transcript	TRUE
chr5	cg16577123	ENSG00000239389	rs753280	PCDHA13	-7.46782	1.37079	5.09919e-08	0.202081	protein_coding	TRUE
chr5	cg11538128	ENSG00000177932	rs6601014	ZNF354C	19.9214	3.6819	6.27996e-08	0.199082	protein_coding	TRUE
chr5	cg04313788	ENSG00000205464	rs226203	ATP6AP1L	-6.73281	0.679235	3.67934e-23	0.197647	protein_coding	TRUE
chr5	cg18489195	ENSG00000120324	rs799833	PCDHB10	1.55737	0.301897	2.48787e-07	0.196933	protein_coding	TRUE
chr5	cg22642909	ENSG00000250120	rs62624460	PCDHA10	14.9504	2.93241	3.42647e-07	0.191669	protein_coding	TRUE
chr5	cg12495687	ENSG00000197375	rs166635	SLC22A5	-11.3707	1.70755	2.75551e-11	0.191342	protein_coding	TRUE
chr5	cg00190355	ENSG00000180104	rs60072495	EXOC3	5.13714	0.987843	1.989e-07	0.189536	protein_coding	TRUE
chr5	cg11600721	ENSG00000164338	rs1220627	UTP15	-5.73928	0.962416	2.47024e-09	0.187719	protein_coding	TRUE
chr5	cg05081760	ENSG00000164181	rs17388949	ELOVL7	-9.09393	1.34825	1.53038e-11	0.185347	protein_coding	TRUE
chr5	cg26556719	ENSG00000272674	rs155807	PCDHB16	2.94435	0.550804	9.01423e-08	0.181416	protein_coding	TRUE
chr5	cg09997693	ENSG00000044115	rs5871680	CTNNA1	-37.2666	6.92029	7.23941e-08	0.181243	protein_coding	TRUE
chr5	cg19596110	ENSG00000250120	rs62624460	PCDHA10	16.0217	2.73009	4.39616e-09	0.181224	protein_coding	TRUE
chr5	cg12791433	ENSG00000064652	rs36180885	SNX24	-5.59931	1.06387	1.4161e-07	0.180153	protein_coding	TRUE
chr5	cg05231888	ENSG00000233006	rs419291	AC034220.3	-7.92378	1.54619	2.98001e-07	0.179786	processed_transcript	TRUE
chr5	cg06852942	ENSG00000225138	rs9313086	CTD-2228K2.7	4.98289	0.718854	4.15785e-12	0.169467	processed_transcript	TRUE
chr5	cg10084902	ENSG00000188573	rs3756602	FBLL1	3.65865	0.629389	6.13577e-09	0.167841	protein_coding	TRUE
chr5	cg05455370	ENSG00000113593	rs36135	PPWD1	29.6405	5.948	6.25203e-07	0.167381	protein_coding	TRUE
chr5	cg14703610	ENSG00000155542	rs252923	SETD9	6.20299	0.973229	1.84623e-10	0.166151	protein_coding	TRUE
chr5	cg19876814	ENSG00000239389	rs200797202	PCDHA13	-11.5706	1.73748	2.7486e-11	0.162761	protein_coding	TRUE
chr5	cg22800045	ENSG00000155542	rs3832360	SETD9	7.01852	1.00729	3.2203e-12	0.157206	protein_coding	TRUE
chr5	cg19412675	ENSG00000061455	rs12518979	PRDM6	-3.90707	0.662095	3.61154e-09	0.156794	protein_coding	TRUE
chr5	cg00275741	ENSG00000204961	rs370307660	PCDHA9	-1.07893	0.205398	1.49737e-07	0.156178	protein_coding	TRUE
chr5	cg14521931	ENSG00000112977	rs2918390	DAP	4.29023	0.65861	7.31461e-11	0.15211	protein_coding	TRUE
chr5	cg02441090	ENSG00000083720	rs12186512	OXCT1	-31.0603	5.72574	5.80575e-08	0.145168	protein_coding	TRUE
chr5	cg10460168	ENSG00000153037	rs7213	SRP19	0.802413	0.140658	1.16529e-08	0.144077	protein_coding	TRUE
chr5	cg19564008	ENSG00000169045	rs13182282	HNRNPH1	-273.603	45.3077	1.55289e-09	0.13978	protein_coding	TRUE
chr5	cg17813930	ENSG00000225138	rs10474783	CTD-2228K2.7	18.8664	3.14465	1.9792e-09	0.134365	processed_transcript	TRUE
chr5	cg18668511	ENSG00000272674	rs17844646	PCDHB16	1.96246	0.251298	5.75066e-15	0.13306	protein_coding	TRUE
chr5	cg24265020	ENSG00000280187	rs12652119	CTC-351M12.1	-8.14557	1.51838	8.11094e-08	0.132268	TEC	TRUE
chr5	cg19648605	ENSG00000161010	rs140691949	C5orf45	11.3384	2.1713	1.77038e-07	0.130188	protein_coding	TRUE
chr5	cg23042882	ENSG00000161010	rs28325	C5orf45	12.9584	2.57717	4.952e-07	0.129052	protein_coding	TRUE
chr5	cg02560085	ENSG00000249158	rs62624460	PCDHA11	-1.65235	0.270554	1.01334e-09	0.128986	protein_coding	TRUE
chr5	cg07905924	ENSG00000155542	rs185220	SETD9	-2.55452	0.222213	1.38502e-30	0.126035	protein_coding	TRUE
chr5	cg08758174	ENSG00000225138	rs9313086	CTD-2228K2.7	10.55	1.52841	5.10658e-12	0.125017	processed_transcript	TRUE
chr5	cg22134413	ENSG00000145908	rs74973123	ZNF300	4.44892	0.67227	3.6471e-11	0.121374	protein_coding	TRUE
chr5	cg01789980	ENSG00000113645	rs2003850	WWC1	-60.317	7.90852	2.40575e-14	0.120783	protein_coding	TRUE
chr5	cg14843632	ENSG00000154122	rs835153	ANKH	-43.7597	6.60849	3.54974e-11	0.120449	protein_coding	TRUE
chr5	cg19876814	ENSG00000249158	rs200797202	PCDHA11	4.41373	0.784789	1.86485e-08	0.117082	protein_coding	TRUE
chr5	cg21159260	ENSG00000225138	rs10475262	CTD-2228K2.7	5.39127	0.793392	1.08149e-11	0.114226	processed_transcript	TRUE
chr5	cg09994109	ENSG00000164404	rs11748063	GDF9	1.12087	0.186332	1.79363e-09	0.111528	protein_coding	TRUE
chr5	cg18668511	ENSG00000120324	rs17844646	PCDHB10	-0.689303	0.130509	1.2803e-07	0.109441	protein_coding	TRUE
chr5	cg23435118	ENSG00000131507	rs7729747	NDFIP1	-80.3396	10.927	1.94702e-13	0.107301	protein_coding	TRUE
chr5	cg12982374	ENSG00000160867	rs31777	FGFR4	3.86312	0.683466	1.58364e-08	0.10728	protein_coding	TRUE
chr5	cg03169021	ENSG00000204961	rs155813	PCDHA9	-0.628347	0.0988967	2.10373e-10	0.105282	protein_coding	TRUE
chr5	cg20203395	ENSG00000155542	rs2662033	SETD9	-1.24525	0.0908212	8.71824e-43	0.105261	protein_coding	TRUE
chr5	cg14853917	ENSG00000161010	rs27474	C5orf45	9.81535	1.7064	8.81561e-09	0.103633	protein_coding	TRUE
chr5	cg18489195	ENSG00000239389	rs799833	PCDHA13	4.3964	0.864107	3.62248e-07	0.103497	protein_coding	TRUE
chr5	cg17553881	ENSG00000180104	rs56346498	EXOC3	9.08795	1.38298	4.98808e-11	0.103091	protein_coding	TRUE
chr5	cg00194186	ENSG00000160867	rs398198	FGFR4	5.61409	1.1406	8.56411e-07	0.102561	protein_coding	TRUE
chr5	cg06852942	ENSG00000180104	rs9313086	EXOC3	4.55652	0.751621	1.34232e-09	0.100536	protein_coding	TRUE
chr5	cg27543327	ENSG00000253406	rs7714706	AC012613.2	8.22171	0.859704	1.13918e-21	0.0988581	antisense	TRUE
chr5	cg00049323	ENSG00000180104	rs56073043	EXOC3	9.71281	1.24888	7.41419e-15	0.0971527	protein_coding	TRUE
chr5	cg22553062	ENSG00000164181	rs17388949	ELOVL7	-7.8939	1.0449	4.19786e-14	0.0968446	protein_coding	TRUE
chr5	cg08758174	ENSG00000180104	rs9313086	EXOC3	9.64726	1.59651	1.51524e-09	0.095833	protein_coding	TRUE
chr5	cg25474616	ENSG00000280187	rs163442	CTC-351M12.1	-3.89234	0.753893	2.43041e-07	0.0906792	TEC	TRUE
chr5	cg01295188	ENSG00000225138	rs10475262	CTD-2228K2.7	9.0631	1.5617	6.50002e-09	0.0873594	processed_transcript	TRUE
chr5	cg14579239	ENSG00000249158	rs62624460	PCDHA11	-2.17982	0.373866	5.5267e-09	0.0868011	protein_coding	TRUE
chr5	cg21483461	ENSG00000186468	rs4703538	RPS23	93.8831	16.7746	2.18436e-08	0.0860236	protein_coding	TRUE
chr5	cg18178840	ENSG00000205464	rs6861268	ATP6AP1L	14.9199	3.03309	8.69641e-07	0.0837908	protein_coding	TRUE
chr5	cg02326566	ENSG00000249158	rs114075983	PCDHA11	-2.14819	0.360281	2.48338e-09	0.0837817	protein_coding	TRUE
chr5	cg21905437	ENSG00000177932	rs7707587	ZNF354C	-3.58479	0.68082	1.39884e-07	0.0835579	protein_coding	TRUE
chr5	cg15168497	ENSG00000164366	rs6899226	CCDC127	-3.84378	0.648092	3.01228e-09	0.0796584	protein_coding	TRUE
chr5	cg17233264	ENSG00000180104	rs10475262	EXOC3	4.6736	0.737677	2.36473e-10	0.0776258	protein_coding	TRUE
chr5	cg08796299	ENSG00000184838	rs7710004	PRR16	-1.54979	0.221237	2.46775e-12	0.0770476	protein_coding	TRUE
chr5	cg24934921	ENSG00000169045	rs11270138	HNRNPH1	-311.518	54.4179	1.03705e-08	0.0752868	protein_coding	TRUE
chr5	cg27450992	ENSG00000145592	rs1070446	RPL37	-24.5021	2.99168	2.61079e-16	0.0738461	protein_coding	TRUE
chr5	cg25967418	ENSG00000272674	rs155807	PCDHB16	2.59941	0.509793	3.41529e-07	0.0726629	protein_coding	TRUE
chr5	cg23450373	ENSG00000249158	rs1606122	PCDHA11	-6.24974	1.26728	8.15516e-07	0.0726079	protein_coding	TRUE
chr5	cg25754158	ENSG00000250120	rs62624460	PCDHA10	-4.53132	0.629139	5.91559e-13	0.0722174	protein_coding	TRUE
chr5	cg03169021	ENSG00000272674	rs155813	PCDHB16	1.17678	0.207419	1.39954e-08	0.0721144	protein_coding	TRUE
chr5	cg00716870	ENSG00000280047	rs13188700	CTC-463A16.1	-4.36922	0.748774	5.37366e-09	0.0686523	TEC	TRUE
chr5	cg01181940	ENSG00000180104	rs72702707	EXOC3	14.3571	2.90548	7.75629e-07	0.0646836	protein_coding	TRUE
chr5	cg14533753	ENSG00000180104	rs12521236	EXOC3	7.44369	1.36023	4.44086e-08	0.0639939	protein_coding	TRUE
chr5	cg00995047	ENSG00000188002	rs4975678	RP11-43F13.1	-5.86957	1.13946	2.58824e-07	0.063413	transcribed_unprocessed_pseudogene	TRUE
chr5	cg15232798	ENSG00000113645	rs2003850	WWC1	-28.1993	3.35375	4.16042e-17	0.0631337	protein_coding	TRUE
chr5	cg22134413	ENSG00000197083	rs74973123	ZNF300P1	41.1782	3.24258	5.97368e-37	0.0625787	transcribed_unprocessed_pseudogene	TRUE
chr5	cg23251141	ENSG00000180104	rs56051594	EXOC3	12.5654	2.42841	2.28753e-07	0.0595517	protein_coding	TRUE
chr5	cg13013644	ENSG00000180104	rs56051594	EXOC3	11.532	2.09442	3.67015e-08	0.0588444	protein_coding	TRUE
chr5	cg06019590	ENSG00000180104	rs6868535	EXOC3	6.75675	1.31872	2.99543e-07	0.057867	protein_coding	TRUE
chr5	cg11046421	ENSG00000112996	rs200929182	MRPS30	-8.9188	1.75986	4.02194e-07	0.0569631	protein_coding	TRUE
chr5	cg03897860	ENSG00000239389	rs10060640	PCDHA13	-7.00044	1.33211	1.47915e-07	0.0564787	protein_coding	TRUE
chr5	cg26556719	ENSG00000204961	rs155807	PCDHA9	-1.58192	0.266306	2.84585e-09	0.0556938	protein_coding	TRUE
chr5	cg04313788	ENSG00000152348	rs226203	ATG10	-2.42511	0.291876	9.67547e-17	0.0547473	protein_coding	TRUE
chr5	cg18083664	ENSG00000044115	rs11955952	CTNNA1	34.3772	4.7628	5.28122e-13	0.0543766	protein_coding	TRUE
chr5	cg17347828	ENSG00000131507	rs13188700	NDFIP1	-144.377	24.4839	3.70619e-09	0.0521013	protein_coding	TRUE
chr5	cg08870741	ENSG00000113593	rs43207	PPWD1	-8.52352	1.07274	1.93299e-15	0.0512545	protein_coding	TRUE
chr5	cg08215811	ENSG00000113119	rs6893225	TMCO6	1.4584	0.294164	7.13066e-07	0.0510765	protein_coding	TRUE
chr5	cg22727565	ENSG00000239389	rs6580012	PCDHA13	10.6109	1.83733	7.68874e-09	0.0509606	protein_coding	TRUE
chr6	cg03185800	ENSG00000124641	rs12523672	MED20	1.80806	0.319705	1.55472e-08	0.988162	protein_coding	TRUE
chr6	cg19468576	ENSG00000170899	rs316152	GSTA4	-5.83784	0.909317	1.36248e-10	0.986758	protein_coding	TRUE
chr6	cg25310384	ENSG00000242574	rs111234931	HLA-DMB	9.53009	1.55969	9.94886e-10	0.985784	protein_coding	TRUE
chr6	cg12663302	ENSG00000233892	rs2844786	PAIP1P1	-0.7755	0.157248	8.1514e-07	0.979731	processed_pseudogene	TRUE
chr6	cg26472089	ENSG00000112062	rs877596	MAPK14	-7.36214	1.47846	6.37176e-07	0.971662	protein_coding	TRUE
chr6	cg23483840	ENSG00000204623	rs6923777	ZNRD1ASP	-12.6661	2.55678	7.27288e-07	0.970695	transcribed_unitary_pseudogene	TRUE
chr6	cg10409680	ENSG00000204525	rs9264625	HLA-C	-18.45	2.43079	3.19584e-14	0.957788	protein_coding	TRUE
chr6	cg22486834	ENSG00000170899	rs316156	GSTA4	-10.5231	1.5739	2.29374e-11	0.955174	protein_coding	TRUE
chr6	cg25209831	ENSG00000235994	rs3778670	RP3-470B24.5	-3.62316	0.579849	4.14561e-10	0.954702	lincRNA	TRUE
chr6	cg07408232	ENSG00000233892	rs2285795	PAIP1P1	0.712089	0.139006	3.01178e-07	0.951717	processed_pseudogene	TRUE
[truncated: 7,308 more rows]
