# Supplementary material for: QTL mapping of human retina DNA methylation identifies 87 gene-epigenome interactions in age-related macular degeneration
Source: Nat Commun. 2024 Mar 4;15:1972. doi: 10.1038/s41467-024-46063-8 (PMC10912779; doi:10.1038/s41467-024-46063-8)
Supplement: Supplementary file 18 — Supplementary Data 15 [file 41467_2024_46063_MOESM18_ESM.xlsx]

## Sheet: Sheet1
Resource	Gene set	Total # genes	# significant genes	Fraction significant genes	Hypergeometric P-value	Empirical P-value	BH FDR	Significant genes
GO_BP	GLUTATHIONE_DERIVATIVE_METABOLIC_PROCESS	17	9	0.53	6.91e-06	1e-05	0.0468	GSTP1;AKR1A1;GSTM1;GSTM3;GSTO1;GSTO2;GSTT2B;GSTA4;MGST3
GO_CC	MHC_PROTEIN_COMPLEX	20	12	0.6	2.47e-08	1e-05	0.00303	HLA-DPA1;HLA-C;HLA-DMA;HLA-DPB1;HLA-DRB1;HLA-A;HLA-DQA2;HLA-DRB5;HLA-DQA1;HLA-DQB1;HLA-DMB;HLA-DOB
GO_CC	MHC_CLASS_II_PROTEIN_COMPLEX	14	10	0.71	3.3e-08	1e-05	0.00303	HLA-DPA1;HLA-DMA;HLA-DPB1;HLA-DRB1;HLA-DQA2;HLA-DRB5;HLA-DQA1;HLA-DQB1;HLA-DMB;HLA-DOB
GO_CC	LUMENAL_SIDE_OF_ENDOPLASMIC_RETICULUM_MEMBRANE	23	9	0.39	0.000124	0.00011	0.0212	HLA-DPA1;HLA-C;HLA-DPB1;HLA-DRB1;HLA-A;HLA-DQA2;HLA-DRB5;HLA-DQA1;HLA-DQB1
GO_CC	LUMENAL_SIDE_OF_MEMBRANE	28	10	0.36	0.000128	0.00014	0.0212	CTSA;HLA-DPA1;HLA-C;HLA-DPB1;HLA-DRB1;HLA-A;HLA-DQA2;HLA-DRB5;HLA-DQA1;HLA-DQB1
GO_CC	ER_TO_GOLGI_TRANSPORT_VESICLE_MEMBRANE	53	14	0.26	0.000252	0.00024	0.029	CNIH3;VTI1B;HLA-DPA1;HLA-C;HLA-DPB1;HLA-DRB1;HLA-A;HLA-DQA2;HLA-DRB5;HLA-DQA1;HLA-DQB1;SAR1A;MCFD2;SEC31B
GO_MF	PEPTIDE_ANTIGEN_BINDING	20	9	0.45	4.02e-05	3e-05	0.027	TAP2;HLA-DQA1;HLA-DPA1;HLA-C;HLA-DPB1;HLA-DRB5;HLA-A;HLA-DQB1;HLA-DRB1
KEGG	VIRAL_MYOCARDITIS	52	17	0.33	2.79e-06	0	0	HLA-DOB;HLA-DRB5;HLA-C;HLA-A;HLA-DRB1;HLA-DPB1;HLA-DPA1;HLA-DQA1;HLA-DQA2;HLA-DQB1;HLA-DMA;HLA-DMB;CASP9;CASP8;CD55;MYH15;MYH3
KEGG	ASTHMA	15	10	0.67	1.03e-07	0	0	HLA-DOB;HLA-DRB5;HLA-DRB1;HLA-DPB1;HLA-DPA1;HLA-DQA1;HLA-DQA2;HLA-DQB1;HLA-DMA;HLA-DMB
KEGG	ALLOGRAFT_REJECTION	20	12	0.6	2.81e-08	1e-05	0.000297	HLA-DOB;HLA-DRB5;HLA-C;HLA-A;HLA-DRB1;HLA-DPB1;HLA-DPA1;HLA-DQA1;HLA-DQA2;HLA-DQB1;HLA-DMA;HLA-DMB
KEGG	TYPE_I_DIABETES_MELLITUS	26	13	0.5	1.37e-07	1e-05	0.000297	HLA-DOB;HLA-DRB5;HLA-C;HLA-A;HLA-DRB1;HLA-DPB1;HLA-DPA1;HLA-DQA1;HLA-DQA2;HLA-DQB1;HLA-DMA;HLA-DMB;CPE
KEGG	GRAFT_VERSUS_HOST_DISEASE	22	13	0.59	9.33e-09	1e-05	0.000297	HLA-DOB;HLA-DRB5;HLA-C;HLA-A;HLA-DRB1;HLA-DPB1;HLA-DPA1;HLA-DQA1;HLA-DQA2;HLA-DQB1;HLA-DMA;HLA-DMB;KLRC1
KEGG	AUTOIMMUNE_THYROID_DISEASE	21	12	0.57	6.01e-08	1e-05	0.000297	HLA-DOB;HLA-DRB5;HLA-C;HLA-A;HLA-DRB1;HLA-DPB1;HLA-DPA1;HLA-DQA1;HLA-DQA2;HLA-DQB1;HLA-DMA;HLA-DMB
KEGG	ANTIGEN_PROCESSING_AND_PRESENTATION	52	16	0.31	1.33e-05	3e-05	0.000668	TAP2;HLA-DOB;HLA-DRB5;HLA-C;HLA-A;HLA-DRB1;HLA-DPB1;HLA-DPA1;HLA-DQA1;HLA-DQA2;HLA-DQB1;HLA-DMA;HLA-DMB;KLRC1;NFYC;CTSS
KEGG	DRUG_METABOLISM_CYTOCHROME_P450	23	10	0.43	1.95e-05	3e-05	0.000668	AOX1;GSTO2;GSTM1;MGST3;GSTP1;FMO2;ADH5;GSTO1;GSTA4;GSTM3
KEGG	INTESTINAL_IMMUNE_NETWORK_FOR_IGA_PRODUCTION	30	11	0.37	5.05e-05	5e-05	0.000989	HLA-DOB;HLA-DRB5;HLA-DRB1;HLA-DPB1;HLA-DPA1;HLA-DQA1;HLA-DQA2;HLA-DQB1;HLA-DMA;HLA-DMB;TNFRSF13C
KEGG	METABOLISM_OF_XENOBIOTICS_BY_CYTOCHROME_P450	25	8	0.32	0.00155	0.00139	0.0247	GSTO2;GSTM1;MGST3;GSTP1;ADH5;GSTO1;GSTA4;GSTM3
KEGG	GLUTATHIONE_METABOLISM	36	10	0.28	0.0014	0.0021	0.0326	GPX7;LAP3;GSTO2;GSTM1;MGST3;GSTP1;GSTO1;GSTA4;GSTM3;GSR
KEGG	LEISHMANIA_INFECTION	55	13	0.24	0.00147	0.0022	0.0326	HLA-DOB;HLA-DRB5;HLA-DRB1;HLA-DPB1;HLA-DPA1;HLA-DQA1;HLA-DQA2;HLA-DQB1;HLA-DMA;HLA-DMB;MAPK14;MAPK13;NOS2
KEGG	GLYCOLYSIS_GLUCONEOGENESIS	42	10	0.24	0.00484	0.0038	0.052	ALDH2;ALDH7A1;LDHAL6A;LDHC;ADH5;PFKM;ALDOC;TPI1;PFKP;AKR1A1
