# Supplementary material for: QTL mapping of human retina DNA methylation identifies 87 gene-epigenome interactions in age-related macular degeneration
Source: Nat Commun. 2024 Mar 4;15:1972. doi: 10.1038/s41467-024-46063-8 (PMC10912779; doi:10.1038/s41467-024-46063-8)
Supplement: Supplementary file 20 — Supplementary Data 17 [file 41467_2024_46063_MOESM20_ESM.xlsx]

## Sheet: Sheet1
Resource	Gene set	Total # genes	# significant genes	Fraction significant genes	Hypergeometric P-value	Empirical P-value	BH FDR	Significant genes
GO_CC	MICROBODY_LUMEN	45	16	0.36	0.000105	0.00013	0.0786	CAT;GRHPR;DHRS4;CRAT;GNPAT;PEX7;ABCD3;LONP2;ACOX3;ACOT4;ECH1;ACOT2;TYSND1;CRYM;AGPS;HMGCL
GO_MF	NUCLEOBASE_CONTAINING_COMPOUND_KINASE_ACTIVITY	38	16	0.42	1.13e-05	1e-05	0.00901	AK4;AK2;AK1;LRGUK;NME1;MAGI3;GUK1;DCK;PNKP;UCKL1;TK2;UCK2;AK3;NME2;TJP2;NME5
GO_MF	PHOSPHOTRANSFERASE_ACTIVITY_PHOSPHATE_GROUP_AS_ACCEPTOR	35	13	0.37	0.00034	0.00025	0.0856	AK4;AK2;AK1;LRGUK;NME1;MAGI3;GUK1;AK3;IP6K2;ITPKB;NME2;TJP2;NME5
GO_MF	CARBOHYDRATE_KINASE_ACTIVITY	19	9	0.47	0.000341	0.00033	0.0856	NAGK;RBKS;GALK1;KHK;HKDC1;PFKM;HK1;GCK;PFKP
GO_MF	RNA_POLYMERASE_ACTIVITY	36	13	0.36	0.000468	0.00038	0.0856	PRIMPOL;MED20;POLR2I;POLR2C;POLR1E;POLR3H;POLR2D;POLR3E;POLR2J3;PRIM1;POLR1B;RPAP1;POLR1D
KEGG	PYRIMIDINE_METABOLISM	85	29	0.34	2.46e-06	1e-05	0.00178	POLE;POLD1;POLD2;POLD4;TYMP;POLR3H;POLR1D;PRIM1;POLA2;TK2;UCK2;UCKL1;RRM2B;POLR2D;POLR2J3;POLR2C;POLR2I;PNP;ENTPD5;NME1;ENTPD6;PNPT1;POLR1E;POLR1B;NME2;NUDT2;DCK;NME5;AK3
KEGG	PURINE_METABOLISM	137	37	0.27	4.94e-05	3e-05	0.00267	ADSSL1;POLE;POLD1;POLD2;POLD4;ADCY4;ADCY5;POLR3H;POLR1D;PRIM1;POLA2;GUCY1A3;RRM2B;POLR2D;POLR2J3;POLR2C;POLR2I;PNP;ENTPD5;NME1;AK4;AK2;AK1;PDE11A;ENTPD6;PNPT1;POLR1E;POLR1B;GUK1;PDE2A;NME2;NUDT2;PDE4B;DCK;PDE6A;GMPR2;NME5
