# Supplementary material for: QTL mapping of human retina DNA methylation identifies 87 gene-epigenome interactions in age-related macular degeneration
Source: Nat Commun. 2024 Mar 4;15:1972. doi: 10.1038/s41467-024-46063-8 (PMC10912779; doi:10.1038/s41467-024-46063-8)
Supplement: Supplementary file 21 — Supplementary Data 18 [file 41467_2024_46063_MOESM21_ESM.xlsx]

## Sheet: Sheet1
chr	exposure	trait	top_snp	bxy	bxy_se	bxy_pval	heidi_pval	AMD locus	Gene	HEIDI_Pvalue_Significant
chr1	cg11348583	AMD	rs12134598	2.52063	0.272711	2.40051e-20	0.000169116	CFH	CFHR3	FALSE
chr1	cg11348583	AMD	rs12134598	2.52063	0.272711	2.40051e-20	0.000169116	CFH	CFHR3	FALSE
chr1	cg11348583	AMD	rs12134598	2.52063	0.272711	2.40051e-20	0.000169116	CFH (CFHR3/CFHR1)	CFHR3	FALSE
chr1	cg11348583	AMD	rs12134598	2.52063	0.272711	2.40051e-20	0.000169116	CFH	CFHR3	FALSE
chr6	cg07357081	AMD	rs116793716	0.510701	0.070664	4.93176e-13	1.84822e-09	C2/CFB/SKIV2L	SLC44A4	FALSE
chr6	cg11032077	AMD	rs204883	-0.544859	0.085461	1.82334e-10	6.73007e-22	C2/CFB/SKIV2L	TNXB	FALSE
chr6	cg00031491	AMD	rs2293751	0.4796	0.0910674	1.391e-07	1.46665e-16	C2/CFB/SKIV2L	SLC44A4	FALSE
chr6	cg14614539	AMD	rs3130294	-0.389142	0.0622509	4.07328e-10	1.20634e-24	C2/CFB/SKIV2L	NOTCH4	FALSE
chr6	cg27134827	AMD	rs3134952	-1.03934	0.196174	1.17054e-07	1.26094e-07	C2/CFB/SKIV2L	PPT2	FALSE
chr6	cg13047157	AMD	rs9273371	0.377754	0.0674519	2.13916e-08	6.72282e-07	C2/CFB/SKIV2L (PBX2)	HLA-DQB1	FALSE
chr6	cg07180897	AMD	rs9273504	-0.287503	0.0483164	2.6744e-09	6.66639e-12	C2/CFB/SKIV2L (PBX2)	HLA-DQB2	FALSE
chr6	cg13353717	AMD	rs9274478	0.129411	0.0195499	3.60374e-11	4.02794e-09	C2/CFB/SKIV2L (PBX2)	HLA-DQB1	FALSE
chr6	cg02451928	AMD	rs1265177	0.631092	0.115682	4.88609e-08	0.0252315	-	CCHCR1;TCF19	FALSE
chr6	cg04710276	AMD	rs28397268	-0.154404	0.0255042	1.41224e-09	9.27654e-07	-	HCG27	FALSE
chr6	cg10813233	AMD	rs41267070	-0.422754	0.0836116	4.27766e-07	1.66904e-21	-	BAT4;CSNK2B	FALSE
chr6	cg17731992	AMD	rs9266209	-0.209661	0.038005	3.45493e-08	6.67148e-12	-	HLA-B	FALSE
chr7	cg11712338	AMD	rs3214376	-0.290941	0.0575502	4.29406e-07	0.717891	KMT2E/SRPK2	-	TRUE
chr7	cg07160278	AMD	rs11766752	0.418548	0.0815748	2.88429e-07	0.0949242	PILRB/PILRA	MEPCE;ZCWPW1	TRUE
chr10	cg27015047	AMD	rs11499293	0.628538	0.115055	4.68379e-08	0.196093	ARMS2/HTRA1	DMBT1	TRUE
chr10	cg17875135	AMD	rs1810391	1.49465	0.278743	8.22488e-08	0.106338	ARMS2/HTRA1	HTRA1	TRUE
chr10	cg21647373	AMD	rs2246731	0.454712	0.0801269	1.38767e-08	0.000341059	ARMS2/HTRA1	HTRA1	FALSE
chr10	cg13670099	AMD	rs3019532	0.52775	0.0941802	2.0992e-08	0.012613	ARMS2/HTRA1	DMBT1	FALSE
chr10	cg16466810	AMD	rs4237540	1.18693	0.154894	1.81888e-14	0.0185875	ARMS2/HTRA1	HTRA1	FALSE
chr10	cg04970100	AMD	rs4752700	1.03814	0.151244	6.69705e-12	0.0369093	ARMS2/HTRA1	HTRA1	FALSE
chr10	cg06241170	AMD	rs4752700	2.07101	0.360489	9.19105e-09	0.339161	ARMS2/HTRA1	HTRA1	TRUE
chr10	cg23238440	AMD	rs5788561	-0.751472	0.135812	3.14491e-08	6.84159e-05	ARMS2/HTRA1	HTRA1	FALSE
chr10	cg17394983	AMD	rs7896881	1.67089	0.222549	6.00629e-14	0.0158272	ARMS2/HTRA1	-	FALSE
chr10	cg09507567	AMD	rs911785	0.411594	0.06637	5.59246e-10	1.92318e-05	-	-	FALSE
