# Supplementary material for: QTL mapping of human retina DNA methylation identifies 87 gene-epigenome interactions in age-related macular degeneration
Source: Nat Commun. 2024 Mar 4;15:1972. doi: 10.1038/s41467-024-46063-8 (PMC10912779; doi:10.1038/s41467-024-46063-8)
Supplement: Supplementary file 22 — Supplementary Data 19 [file 41467_2024_46063_MOESM22_ESM.xlsx]

## Sheet: Sheet1
chr	exposure	trait	top_snp	external_gene_name	bxy	bxy_se	bxy_pval	heidi_pval	AMD locus	HEIDI_Pvalue_Significant	Identified in Ratnapriya et. al	Identified in Orozco et. al	Identified in Strunz et. al
chr4	ENSG00000123739	AMD	rs7439493	PLA2G12A	-0.0416464	0.00756006	3.61415e-08	0.225588	CFI	TRUE	Yes	No	No
chr6	ENSG00000244731	AMD	rs12525100	C4A	-0.00658509	0.00144148	4.91735e-06	0.0144857	C2/CFB/SKIV2L	FALSE	No	No	No
chr6	ENSG00000204348	AMD	rs45451301	DXO	0.2989	0.0575125	2.02389e-07	0.384384	C2/CFB/SKIV2L	TRUE	No	No	No
chr6	ENSG00000179344	AMD	rs9273510	HLA-DQB1	-0.0534604	0.00824118	8.75711e-11	7.77167e-10	C2/CFB/SKIV2L (PBX2)	FALSE	No	No	No
chr6	ENSG00000232629	AMD	rs9274552	HLA-DQB2	0.649962	0.104606	5.18463e-10	6.02577e-07	C2/CFB/SKIV2L (PBX2)	FALSE	No	No	No
chr7	ENSG00000121716	AMD	rs111344110	PILRB	0.00360846	0.000670931	7.51991e-08	0.204028	PILRB/PILRA	TRUE	Yes	Yes	Yes
chr7	ENSG00000242294	AMD	rs111344110	STAG3L5P	0.0107801	0.00200756	7.88592e-08	0.140171	PILRB/PILRA	TRUE	No	No	No
chr7	ENSG00000085514	AMD	rs111344110	PILRA	0.0188223	0.00348905	6.86471e-08	0.119843	PILRB/PILRA	TRUE	Yes	Yes	Yes
chr7	ENSG00000078487	AMD	rs11771241	ZCWPW1	0.164478	0.0337437	1.09178e-06	0.112427	PILRB/PILRA	TRUE	Yes	No	No
chr10	ENSG00000107679	AMD	rs10887149	PLEKHA1	-0.139054	0.021907	2.18913e-10	1.51176e-31	ARMS2/HTRA1	FALSE	No	No	No
chr10	ENSG00000166033	AMD	rs4328161	HTRA1	-0.0160548	0.00209636	1.8825e-14	3.57075e-07	ARMS2/HTRA1	FALSE	No	Yes	No
chr12	ENSG00000135441	AMD	rs3138141	BLOC1S1	0.0537297	0.0107963	6.46868e-07	0.301843	RDH5/CD63	TRUE	Yes	Yes	No
chr15	ENSG00000140522	AMD	rs3825991	RLBP1	0.00199651	0.000441755	6.19852e-06	0.0285572	-	FALSE	No	-	-
chr17	ENSG00000004142	AMD	rs2239907	POLDIP2	0.0388001	0.00833677	3.25408e-06	0.431124	TMEM97/VTN	TRUE	Yes	No	No
