# Supplementary material for: QTL mapping of human retina DNA methylation identifies 87 gene-epigenome interactions in age-related macular degeneration
Source: Nat Commun. 2024 Mar 4;15:1972. doi: 10.1038/s41467-024-46063-8 (PMC10912779; doi:10.1038/s41467-024-46063-8)
Supplement: Supplementary file 24 — Supplementary Data 21 [file 41467_2024_46063_MOESM24_ESM.xlsx]

## Sheet: Sheet1
Trait	CpG	best.snp.GM	PPA.GM	chr	Loci	Target Gene
AMD	cg06080267	rs191584800	0.804418	chr1	-	MAN1C1
AMD	cg04056179	rs189635145	0.828616	chr2	-	MOBKL3
AMD	cg13927504	rs144792755	0.801473	chr5	-	-
AMD	cg23046682	rs62401256	0.802982	chr6	VEGFA	TCTE1
AMD	cg13199639	rs146371948	0.807395	chr6	-	KIFC1
AMD	cg09556393	rs62401794	0.80766	chr6	VEGFA	AARS2
AMD	cg18279148	rs62402737	0.81106	chr6	C2/CFB/SKIV2L	DAXX
AMD	cg02451928	rs3134608	0.820723	chr6	C2/CFB/SKIV2L	CCHCR1
AMD	cg21205776	rs184003	0.826027	chr6	C2/CFB/SKIV2L	COL11A2
AMD	cg16496847	rs146371948	0.828253	chr6	-	CUTA
AMD	cg21024122	rs146371948	0.829247	chr6	-	BAT1
AMD	cg03610567	rs9263855	0.831623	chr6	-	TRIM26
AMD	cg11624225	rs146371948	0.834819	chr6	-	CUTA
AMD	cg16868572	rs28724898	0.856112	chr6	-	ZBTB12
AMD	cg23363602	rs114089979	0.858997	chr6	-	-
AMD	cg23155089	rs9394963	0.860984	chr6	-	-
AMD	cg26290219	rs200251510	0.862668	chr6	C2/CFB/SKIV2L	-
AMD	cg13115683	rs41287842	0.869427	chr6	-	HCG9
AMD	cg06023661	rs9296088	0.876893	chr6	-	NOTCH4
AMD	cg00013015	rs28724902	0.890432	chr6	-	-
AMD	cg22906224	rs34130487	0.801609	chr7	PILRB/PILRA	-
AMD	cg25654768	rs35699090	0.802627	chr7	PILRB/PILRA	MUC12
AMD	cg12993791	rs35699090	0.804381	chr7	PILRB/PILRA	MOSPD3
AMD	cg04039547	rs34130487	0.804958	chr7	PILRB/PILRA	LAMTOR4
AMD	cg14736458	rs866500	0.806297	chr7	PILRB/PILRA	-
AMD	cg20848291	rs35699090	0.808103	chr7	PILRB/PILRA	ZAN
AMD	cg16822777	rs117445819	0.815877	chr7	-	SMURF1
AMD	cg18750210	rs34130487	0.851701	chr7	PILRB/PILRA	ZKSCAN1
AMD	cg27546981	rs11771799	0.859418	chr7	PILRB/PILRA	PLOD3
AMD	cg07693238	rs34130487	0.863052	chr7	PILRB/PILRA	-
AMD	cg07902050	rs34130487	0.876289	chr7	PILRB/PILRA	-
AMD	cg03034714	rs7799946	0.897171	chr7	PILRB/PILRA	SMURF1
AMD	cg03034714	rs60458236	0.930728	chr7	PILRB/PILRA	SMURF1
AMD	cg22821839	rs13278062	0.823544	chr8	TNFRSF10A	C8orf58
AMD	cg06715397	rs77282753	0.802247	chr10	-	PDZD7
AMD	cg02250046	rs10883553	0.827089	chr10	-	CPN1
AMD	cg19170909	rs80334579	0.803604	chr12	-	-
AMD	cg05742988	rs201888691	0.807581	chr12	-	ESYT1
AMD	cg05584675	rs1052165	0.817355	chr12	RDH5/CD63	SARNP
AMD	cg15466281	rs56108400	0.833119	chr12	RDH5/CD63	GDF11
AMD	cg19170909	rs1725357	0.835033	chr12	-	-
AMD	cg19170909	rs73119252	0.864328	chr12	RDH5/CD63	-
AMD	cg21034095	rs2350892	0.818118	chr14	-	PPM1A
AMD	cg01604380	rs4442732	0.855612	chr14	-	RTN1
AMD	cg14323928	rs7182946	0.806086	chr15	-	TRPM1
AMD	cg21851553	rs6493454	0.807226	chr15	-	TRPM1
AMD	cg12754219	rs11635753	0.818449	chr15	-	LOC101929076
AMD	cg00202829	rs35213055	0.82076	chr15	-	CCDC33
AMD	cg16646645	rs11070808	0.824034	chr15	-	TRPM1
AMD	cg26486099	rs35213055	0.834501	chr15	-	CCDC33
AMD	cg20275928	rs6565597	0.800284	chr17	NPLOC4/TSPAN10	C17orf55
AMD	cg25673720	rs3044630	0.800621	chr17	-	RNF157
AMD	cg13666659	rs11080055	0.801441	chr17	TMEM97/VTN	NLK
AMD	cg03639290	rs56782029	0.803486	chr17	-	FN3KRP
AMD	cg03639290	rs11868178	0.804077	chr17	NPLOC4/TSPAN10	FN3KRP
AMD	cg08995661	rs6565597	0.807021	chr17	NPLOC4/TSPAN10	BAIAP2
AMD	cg12779301	rs6565597	0.807054	chr17	NPLOC4/TSPAN10	BAIAP2
AMD	cg21974464	rs8081701	0.811752	chr17	NPLOC4/TSPAN10	SLC16A3
AMD	cg21028142	rs9890460	0.81381	chr17	-	NPLOC4
AMD	cg23372936	rs117442194	0.815169	chr17	-	-
AMD	cg06577703	rs76645549	0.817711	chr17	NPLOC4/TSPAN10	BAHCC1
AMD	cg11255590	rs9303241	0.840855	chr17	-	ABR
AMD	cg10693767	rs142564586	0.891306	chr17	NPLOC4/TSPAN10	RPTOR
AMD	cg16826504	rs36143375	0.894369	chr17	NPLOC4/TSPAN10	RPTOR
AMD	cg13831388	rs35867105	0.908478	chr17	NPLOC4/TSPAN10	RPTOR
AMD	cg24111008	rs74174385	0.800458	chr19	C3	PNPLA6
AMD	cg04993883	rs181278716	0.802711	chr19	-	OPA3
AMD	cg17805031	rs62126031	0.802943	chr19	-	LIG1
AMD	cg09935308	rs113772652	0.803559	chr19	CNN2	MIER2
AMD	cg11783264	rs60634368	0.803648	chr19	CNN2	SCAMP4
AMD	cg00686803	rs62127947	0.806073	chr19	-	SCAF1
AMD	cg15607449	rs34427684	0.807444	chr19	-	RPL13AP5
AMD	cg01468567	rs34427684	0.808112	chr19	-	TEAD2
AMD	cg16086406	rs344583	0.808373	chr19	-	FUT3
AMD	cg04687437	rs3087680	0.808654	chr19	CNN2	C19orf20
AMD	cg18077160	rs62127947	0.809792	chr19	-	-
AMD	cg21919992	rs62127947	0.809817	chr19	-	LMTK3
AMD	cg01336136	rs12019136	0.831615	chr19	C3 (NRTN/FUT6)	MLLT1
AMD	cg08271318	rs429358	0.838401	chr19	APOE	ZNF235
AMD	cg00879667	rs344583	0.855179	chr19	-	CAPS
AMD	cg08524344	rs141560150	0.865911	chr19	C3	-
AMD	cg15985003	rs36207878	0.888834	chr19	CNN2	POLRMT
AMD	cg10289051	rs1389623	0.89612	chr19	C3	MCEMP1
AMD	cg07702051	rs6127905	0.807391	chr20	-	-
AMD	cg00237625	rs11570381	0.837114	chr22	-	-
