# Supplementary material for: QTL mapping of human retina DNA methylation identifies 87 gene-epigenome interactions in age-related macular degeneration
Source: Nat Commun. 2024 Mar 4;15:1972. doi: 10.1038/s41467-024-46063-8 (PMC10912779; doi:10.1038/s41467-024-46063-8)
Supplement: Supplementary file 26 — Supplementary Data 23 [file 41467_2024_46063_MOESM26_ESM.xlsx]

## Sheet: Sheet1
Trait	CpG	best.snp.GM	PPA.GM	chr	Loci	Target Gene	Gene_ID	best.snp.GE	PPA.GE	chr	Gene_symbol	Biotype	Loci
AMD	cg22906224	rs34130487	0.801609	chr7	PILRB/PILRA	-	ENSG00000160862	rs34130487	0.801124	chr7	AZGP1	protein_coding	PILRB/PILRA
AMD	cg21851553	rs6493454	0.807226	chr15	-	TRPM1	ENSG00000166912	rs6493454	0.801828	chr15	MTMR10	protein_coding	-
AMD	cg13666659	rs11080055	0.801441	chr17	TMEM97/VTN	NLK	ENSG00000007216	rs11080055	0.804358	chr17	SLC13A2	protein_coding	TMEM97/VTN
AMD	cg04687437	rs3087680	0.808654	chr19	CNN2	C19orf20	ENSG00000065268	rs3087680	0.801174	chr19	WDR18	protein_coding	CNN2
