# Supplementary material for: QTL mapping of human retina DNA methylation identifies 87 gene-epigenome interactions in age-related macular degeneration
Source: Nat Commun. 2024 Mar 4;15:1972. doi: 10.1038/s41467-024-46063-8 (PMC10912779; doi:10.1038/s41467-024-46063-8)
Supplement: Supplementary file 27 — Supplementary Data 24 [file 41467_2024_46063_MOESM27_ESM.xlsx]

## Sheet: Sheet1
Trait	E	M	best.snp.GEM	PPA.GEM	Snp_position	chr	Gene_symbol	Biotype	Loci
AMD	ENSG00000204348	cg22670819	rs114820183	0.838887	31933131	chr6	DXO	protein_coding	C2/CFB/SKIV2L
AMD	ENSG00000221838	cg00854166	rs34130487	0.816712	100161582	chr7	AP4M1	protein_coding	PILRB/PILRA
AMD	ENSG00000221838	cg14736458	rs34130487	0.848156	100161582	chr7	AP4M1	protein_coding	PILRB/PILRA
AMD	ENSG00000221838	cg04039547	rs34130487	0.922474	100161582	chr7	AP4M1	protein_coding	PILRB/PILRA
AMD	ENSG00000183955	cg00472528	rs34477554	0.893397	123405486	chr12	KMT5A	protein_coding	-
AMD	ENSG00000166912	cg19881011	rs6493454	0.824848	31101742	chr15	MTMR10	protein_coding	-
AMD	ENSG00000178802	cg21565421	rs11072507	0.838711	74762525	chr15	MPI	protein_coding	-
AMD	ENSG00000103966	cg11955166	rs72735670	0.851366	40922983	chr15	EHD4	protein_coding	-
AMD	ENSG00000178802	cg13906792	rs11072507	0.901099	74762525	chr15	MPI	protein_coding	-
AMD	ENSG00000166912	cg16646645	rs6493454	0.905204	31101742	chr15	MTMR10	protein_coding	-
AMD	ENSG00000166912	cg14323928	rs6493454	0.966802	31101742	chr15	MTMR10	protein_coding	-
AMD	ENSG00000166912	cg21851553	rs6493454	0.969666	31101742	chr15	MTMR10	protein_coding	-
AMD	ENSG00000166569	cg23999607	rs4940875	0.853521	59463337	chr18	CPLX4	protein_coding	-
AMD	ENSG00000161609	cg03536881	rs2098709	0.81094	48684412	chr19	KASH5	protein_coding	-
AMD	ENSG00000182087	cg05475770	rs67538026	0.885665	1031439	chr19	TMEM259	protein_coding	CNN2
AMD	ENSG00000182087	cg00752531	rs67538026	0.892399	1031439	chr19	TMEM259	protein_coding	CNN2
AMD	ENSG00000182087	cg09935308	rs113772652	0.972929	1031551	chr19	TMEM259	protein_coding	CNN2
AMD	ENSG00000124104	cg03641251	rs4810499	0.998629	46340784	chr20	SNX21	protein_coding	-
