# Supplementary material for: QTL mapping of human retina DNA methylation identifies 87 gene-epigenome interactions in age-related macular degeneration
Source: Nat Commun. 2024 Mar 4;15:1972. doi: 10.1038/s41467-024-46063-8 (PMC10912779; doi:10.1038/s41467-024-46063-8)
Supplement: Supplementary file 28 — Supplementary Data 25 [file 41467_2024_46063_MOESM28_ESM.xlsx]

## Sheet: CpGs
CpGs
cg10018845
cg19693677
cg03956908
cg14063843
cg04306220
cg09004167
cg08477332
cg16348003
cg01347250
cg04077668
cg04993605
cg07913096
cg26058965
cg03146154
cg09363892
cg15633699
cg00255405
cg20411340
cg09331144
cg24034746
cg00211609
cg08130307
cg09082263
cg03851496
cg21058413
cg17936236
cg19948045
cg01169725
cg09365446
cg04414720
cg00504075
cg00857998
cg11170025
cg18845703
cg03522107
cg02987928
cg15025200
cg13498757
cg18273593
cg16109817
cg12084952
cg22614927
cg21399703
cg20771596
cg22374474
cg02713706
cg11166453
cg26060667
cg05639522
cg07313626
cg06612871
cg09122657
cg23913482
cg24846680
cg08700651
cg14976592
cg16413020
cg24545100
cg00855731
cg01200585
cg25066665
cg15920552
cg00917251
cg08518475
cg06786773
cg01557798
cg09506600
cg08861456
cg08944170
cg03748376
cg20507276
cg20433858
cg25983401
cg00785941
cg08130084
cg10886419
cg27483432
cg10580513
cg23028721
cg16717532
cg15590113
cg12978857
cg04021497
cg27409662
cg22358066
cg16924704
cg03384426
cg18267943
cg18801370
cg00695362
cg11965913
cg14893161
cg14159672
cg24503407
cg05841700
cg16334093
cg14806693
cg10120255
cg00843917
cg12919773
cg03981535
cg10607462
cg15104031
cg11915664
cg16282977
cg11596404
cg27469660
cg06750292
cg00328217
cg03420647
cg22956858
cg10483611
cg06642677
cg10768996
cg00329300
cg12426196
cg24161057
cg24411043
cg18147168
cg13466383
cg13906823
cg27180868
cg11731300
cg20012024
cg17826594
cg22502492
cg22352176
cg04320760
cg20177502
cg09832911
cg26291600
cg15661580
cg19501312
cg04009799
cg17383262
cg17288694
cg11799387
cg15681295
cg01325993
cg07111274
cg05678157
cg06563472
cg01701415
cg12312308
cg08627624
cg07409741
cg14068301
cg08363235
cg24037270
cg20014988
cg00168459
cg17673495
cg00936935
cg05102856
cg24165102
cg14716689
cg27462740
cg24826102
cg17066238
cg25363789
cg19309054
cg20584555
cg05481452
cg26363414
cg27305510
cg02375832
cg03800939
cg12532791
cg05516272
cg17237223
cg07977202
cg07165756
cg19308365
cg19738233
cg07689907
cg18195628
cg20008734
cg08596817
cg05861348
cg24204282
cg03909529
cg15463284
cg15700009
cg07415359
cg08418111
cg14332815
cg19767548
cg02232751
cg06888460
cg01489981
cg23350132
cg27221977
cg20449816
cg15412087
cg11156528
cg18336825
cg23513443
cg18351999
cg14479638
cg27610672
cg25963980
cg07358852
cg19653967
cg03438692
cg19792802
cg15957004
cg16555856
cg12037516
cg09997546
cg01319593
cg04747388
cg12608775
cg13143389
cg04000281
cg16423756
cg27095718
cg21216543
cg17741383
cg17637969
cg16709841
cg27523351
cg09537870
cg22149555
cg16020270
cg23470262
cg23058246
cg03425615
cg08695912
cg13046214
cg07052262
cg20765580
cg19837214
cg16120883
cg03538318
cg22844555
cg08424446
cg05625100
cg16214937
cg12163867
cg02521854
cg26937277
cg23837299
cg13614819
cg09904296
cg21540775
cg22573917
cg02175503
cg23932063
cg04671087
cg01765077
cg02243221
cg10388270
cg05614952
cg14903202
cg03279164
cg08409956
cg15108326
cg14949892
cg16300310
cg13163660
cg13249833
cg09239756
cg08332726
cg11208719
cg13212803
cg23381749
cg00395697
cg10767920
cg00366859
cg06532071
cg07293736
cg21858108
cg00368532
cg27301488
cg09889491
cg03209332
cg10650853
cg06600276
cg10701104
cg04850731
cg26722417
cg17560472
cg26392922
cg24480012
cg26133399
cg23767318
cg12003134
cg20007569
cg24001142
cg23316161
cg06771610
cg02071074
cg14208976
cg21025488
cg02305431
cg20399252
cg22829304
cg20478291
cg07883832
cg23335124
cg10317198
cg13158272
cg00588867
cg25600027
cg00579484
cg22268113
cg13105904
cg12842747
cg00524400
cg23112188
cg22775413
cg22990158
cg19777190
cg04246305
cg21911968
cg10131124
cg08180304
cg24778241
cg09119665
cg00754900
cg02190211
cg22836787
cg07073801
cg25411488
cg19460792
cg02636176
cg23777943
cg02155558
cg05111383
cg08996748
cg13931752
cg10636426
cg26924012
cg14582100
cg21132104
cg04786043
cg10620100
cg02198044
cg19468534
cg13011248
cg17051591
cg21523688
cg09159619
cg12727528
cg19911362
cg13045913
cg08186447
cg22512773
cg20701996
cg11513352
cg03041989
cg02190038
cg05034471
cg07337129
cg06710853
cg05951521
cg05335886
cg03088525
cg08051231
cg11605336
cg07772147
cg06030619
cg08743619
cg04536393
cg03021417
cg02575675
cg01827781
cg24235633
cg24474561
cg22191015
cg22581518
cg13552869
cg16717988
cg07798295
cg11907426
cg24969261
cg15670585
cg12064134
cg07157333
cg21969292
cg16270890
cg26505691
cg03418659
cg13205013
cg09540102
cg07749019
cg17640201
cg00944388
cg04287289
cg01234685
cg00750074
cg02187348
cg02244288
cg10047753
cg04131680
cg15737409
cg19190016
cg18593210
cg21104437
cg20634733
cg25256661
cg24601656
cg02605292
cg27016544
cg14668889
cg18650669
cg26002236
cg12107626
cg10487724
cg02118635
cg20207911
cg21832826
cg00549475
cg26370237
cg01620849
cg16068336
cg25039879
cg04398451
cg19695633
cg07352016
cg06592575
cg18140558
cg00363486
cg11687085
cg18568001
cg10066151
cg18449879
cg16287180
cg06743283
cg11952622
cg13877915
cg09263206
cg02931271
cg16907400
cg06615152
cg15797933
cg15138186
cg09231418
cg08562149
cg16000463
cg02493364
cg21011974
cg00200526
cg22802439
cg22548353
cg19801897
cg00204262
cg25675800
cg16982741
cg06180200
cg08059845
cg04090834
cg21496419
cg25654926
cg24539764
cg07278503
cg15797834
cg06063452
cg00852565
cg18805164
cg23391173
cg19295796
cg15249900
cg00397851
cg16635176
cg07624650
cg00568177
cg11172960
cg22186853
cg26874164
cg03735888
cg06064345
cg18469665
cg08574423
cg22712983
cg20891558
cg19325132
cg19729930
cg01017244
cg05890377
cg05776053
cg07909619
cg07880854
cg10293909
cg08541846
cg23692114
cg16570455
cg17273725
cg24828208
cg00327537
cg22084806
cg26336264
cg05027052
cg02717117
cg06970082
cg24674087
cg14520482
cg11502844
cg23392804
cg00672622
cg14958017
cg16965027
cg11027058
cg17974684
cg15370332
cg16440984
cg25654774
cg09295081
cg17916490
cg24269863
cg01835656
cg21550016
cg19083407
cg11763394
cg07772999
cg17445212
cg06675538
cg02675527
cg21482265
cg23122642
cg23156509
cg07594247
cg01577475
cg09704166
cg00422909
cg19921829
cg21399778
cg11040329
cg04170071
cg02452253
cg12946832
cg04178439
cg08640923
cg08396863
cg16725050
cg08378442
cg11348442
cg13981425
cg03494837
cg04606053
cg04316754
cg23021040
cg22519017
cg00032376
cg12287702
cg11859203
cg13636640
cg11922086
cg24348495
cg14760620
cg05768532
cg18674871
cg15588266
cg21218996
cg16909583
cg13210069
cg04455712
cg21538064
cg27534599
cg17333767
cg13248581
cg08559357
cg03806693
cg10475477
cg27517186
cg06462666
cg05114740
cg00335892
cg13885867
cg22409069
cg01066936
cg03086022
cg14186256
cg14458815
cg06345736
cg20512270
cg18441959
cg17999327
cg14844130
cg02840242
cg25330366
cg24894377
cg26465662
cg08193579
cg24655016
cg12358524
cg12397426
cg08095637
cg00832555
cg27467234
cg04714994
cg16306190
cg02860240
cg05344026
cg23707559
cg06047990
cg01797371
cg01079515
cg15729578
cg00031303
cg11601932
cg22373683
cg10071305
cg20085261
cg19186409
cg09771827
cg13683864
cg01475735
cg09455208
cg18349522
cg08489410
cg18495847
cg16706546
cg23956648
cg07672748
cg05576949
cg01951420
cg18685394
cg25516803
cg23983435
cg25493589
cg11142705
cg21681168
cg15433422
cg12930392
cg00831726
cg08113027
cg22826874
cg24964915
cg00468631
cg12873189
cg25441467
cg02089916
cg19642231
cg14559075
cg03640051
cg07557423
cg17280671
cg15478081
cg26479374
cg04703765
cg05095125
cg05381578
cg00220737
cg02292679
cg21546981
cg20444990
cg12414557
cg12468008
cg13467274
cg24386507
cg27543327
cg11046421
cg02865165
cg09817018
cg01993799
cg09997693
cg27247993
cg12205435
cg26303737
cg02891314
cg23248424
cg19564008
cg24934921
cg03983890
cg23221052
cg13944838
cg23260877
cg26210449
cg08523384
cg02560085
cg02326566
cg14579239
cg19596110
cg26514430
cg22642909
cg25967418
cg19876814
cg02051771
cg11268983
cg18668511
cg15911328
cg03915372
cg17652792
cg25875191
cg11598255
cg06060754
cg05015628
cg04869206
cg15628377
cg02939918
cg21619059
cg17388039
cg02206980
cg01064902
cg07534331
cg16113883
cg18287768
cg10683668
cg19862242
cg01981433
cg22014112
cg17279839
cg01270001
cg12556325
cg05332525
cg23542113
cg06586915
cg19341901
cg07391690
cg07993367
cg09648233
cg01650433
cg16807089
cg26976239
cg00421735
cg00989315
cg02517270
ch.7.557703F
cg13901245
cg09447578
cg01302119
cg20231669
cg26260033
cg12979234
cg06224889
cg22729910
cg05786569
cg26879431
cg14695370
cg13990351
cg03849132
cg16852038
cg18739932
cg21975377
cg24115571
cg23820746
cg03612190
cg20387387
cg18716679
cg01049884
cg16294143
cg12177456
cg18511128
cg00065570
cg26272248
cg11631160
cg00517855
cg11042561
cg17475200
cg00767010
cg13792579
cg13747609
cg14350257
cg14148609
cg04745703
cg02535073
cg07405163
cg16223770
cg09445097
cg17079172
cg05364011
cg09126156
cg07023135
cg00552574
cg14282632
cg06097859
cg04582938
cg14006318
cg08655016

## Sheet: Genes
Gene ID	Gene_symbol
ENSG00000204991	SPIRE2
ENSG00000259925	CTA-363E6.2
ENSG00000177042	TMEM80
ENSG00000184232	OAF
ENSG00000149480	MTA2
ENSG00000267056	AC005336.4
ENSG00000274627	RP11-104N10.2
ENSG00000113812	ACTR8
ENSG00000004455	AK2
ENSG00000101198	NKAIN4
ENSG00000128944	KNSTRN
ENSG00000124406	ATP8A1
ENSG00000235098	ANKRD65
ENSG00000181873	IBA57
ENSG00000164930	FZD6
ENSG00000245680	ZNF585B
ENSG00000088305	DNMT3B
ENSG00000198466	ZNF587
ENSG00000241728	AP001062.8
ENSG00000128928	IVD
ENSG00000169629	RGPD8
ENSG00000130177	CDC16
ENSG00000137804	NUSAP1
ENSG00000172661	FAM21C
ENSG00000176209	SMIM19
ENSG00000254470	AP5B1
ENSG00000156414	TDRD9
ENSG00000131845	ZNF304
ENSG00000136854	STXBP1
ENSG00000180185	FAHD1
ENSG00000006007	GDE1
ENSG00000166275	BORCS7
ENSG00000119718	EIF2B2
ENSG00000128463	EMC4
ENSG00000109047	RCVRN
ENSG00000271853	RP1-178F15.5
ENSG00000134324	LPIN1
ENSG00000280265	CTA-363E6.3
ENSG00000073050	XRCC1
ENSG00000213672	NCKIPSD
ENSG00000139899	CBLN3
ENSG00000111215	PRR4
ENSG00000154518	ATP5G3
ENSG00000115310	RTN4
ENSG00000116675	DNAJC6
ENSG00000176945	MUC20
ENSG00000243708	PLA2G4B
ENSG00000166796	LDHC
ENSG00000170545	SMAGP
ENSG00000139725	RHOF
ENSG00000185436	IFNLR1
ENSG00000024048	UBR2
ENSG00000119227	PIGZ
ENSG00000203791	METTL10
ENSG00000266472	MRPS21
ENSG00000177239	MAN1B1
ENSG00000116514	RNF19B
ENSG00000182379	NXPH4
ENSG00000127399	LRRC61
ENSG00000165506	DNAAF2
ENSG00000175826	CTDNEP1
ENSG00000278126	RP11-454E5.4
ENSG00000258727	RP11-66N24.3
ENSG00000164929	BAALC
ENSG00000162688	AGL
ENSG00000232903	LINC01166
ENSG00000162039	MEIOB
ENSG00000162194	LBHD1
ENSG00000131238	PPT1
ENSG00000214402	LCNL1
ENSG00000130312	MRPL34
ENSG00000236850	BMS1P20
ENSG00000214725	CDIPT-AS1
ENSG00000106018	VIPR2
ENSG00000104112	SCG3
ENSG00000276449	AC004076.5
ENSG00000111450	STX2
ENSG00000162461	SLC25A34
ENSG00000236200	KDM4A-AS1
ENSG00000132661	NXT1
ENSG00000255837	TAS2R20
ENSG00000250616	RP11-455F5.3
ENSG00000139620	KANSL2
ENSG00000115685	PPP1R7
ENSG00000072135	PTPN18
ENSG00000135636	DYSF
ENSG00000157093	LYZL4
ENSG00000148795	CYP17A1
ENSG00000143457	GOLPH3L
ENSG00000126870	WDR60
ENSG00000125445	MRPS7
ENSG00000272333	KMT2B
ENSG00000159958	TNFRSF13C
ENSG00000189171	S100A13
ENSG00000044115	CTNNA1
ENSG00000263072	ZNF213-AS1
ENSG00000197599	CCDC154
ENSG00000160208	RRP1B
ENSG00000273011	RP11-728K20.3
ENSG00000272335	RP11-53O19.3
ENSG00000120256	LRP11
ENSG00000253710	ALG11
ENSG00000169045	HNRNPH1
ENSG00000144152	FBLN7
ENSG00000173825	TIGD3
ENSG00000049239	H6PD
ENSG00000179698	WDR97
ENSG00000175115	PACS1
ENSG00000073146	MOV10L1
ENSG00000143537	ADAM15
ENSG00000196458	ZNF605
ENSG00000226686	LINC01535
ENSG00000133059	DSTYK
ENSG00000130332	LSM7
ENSG00000185989	RASA3
ENSG00000161010	C5orf45
ENSG00000105877	DNAH11
ENSG00000117407	ARTN
ENSG00000187824	TMEM220
ENSG00000125804	FAM182A
ENSG00000147813	NAPRT
ENSG00000172803	SNX32
ENSG00000242686	RP11-1191J2.2
ENSG00000100418	DESI1
ENSG00000275552	CH17-302M23.1
ENSG00000171766	GATM
ENSG00000182004	SNRPE
ENSG00000143157	POGK
ENSG00000127824	TUBA4A
ENSG00000272079	LA16c-380H5.5
ENSG00000115687	PASK
ENSG00000113811	SELK
ENSG00000023608	SNAPC1
ENSG00000067057	PFKP
ENSG00000122085	MTERF4
ENSG00000104518	GSDMD
ENSG00000188234	AGAP4
ENSG00000100325	ASCC2
ENSG00000188643	S100A16
ENSG00000160294	MCM3AP
ENSG00000100987	VSX1
ENSG00000272145	NFYC-AS1
ENSG00000149743	TRPT1
ENSG00000165502	RPL36AL
ENSG00000133028	SCO1
ENSG00000107854	TNKS2
ENSG00000160226	C21orf2
ENSG00000141560	FN3KRP
ENSG00000237975	FLG-AS1
ENSG00000275778	PRH1-PRR4
ENSG00000138592	USP8
ENSG00000100023	PPIL2
ENSG00000104774	MAN2B1
ENSG00000180370	PAK2
ENSG00000166228	PCBD1
ENSG00000232656	IDI2-AS1
ENSG00000167523	SPATA33
ENSG00000110436	SLC1A2
ENSG00000118997	DNAH7
ENSG00000186301	MST1P2
ENSG00000073792	IGF2BP2
ENSG00000106052	TAX1BP1
ENSG00000066926	FECH
ENSG00000141098	GFOD2
ENSG00000122678	POLM
ENSG00000188707	ZBED6CL
ENSG00000134287	ARF3
ENSG00000278238	RP11-245D16.4
ENSG00000182168	UNC5C
ENSG00000163050	ADCK3
ENSG00000040531	CTNS
ENSG00000149600	COMMD7
ENSG00000087111	PIGS
ENSG00000103316	CRYM
ENSG00000162222	TTC9C
ENSG00000250790	RP11-46H11.3
ENSG00000126267	COX6B1
ENSG00000107745	MICU1
ENSG00000255284	AP006621.5
ENSG00000278615	C11orf98
ENSG00000166140	ZFYVE19
ENSG00000205659	LIN52
ENSG00000162994	CLHC1
ENSG00000174652	ZNF266
ENSG00000244270	RPL32P29
ENSG00000109846	CRYAB
ENSG00000256576	RP13-977J11.2
ENSG00000274828	RP11-567M16.6
ENSG00000254510	RP11-867G23.10
ENSG00000184277	TM2D3
ENSG00000119139	TJP2
ENSG00000166896	ATP23
ENSG00000173875	ZNF791
ENSG00000087008	ACOX3
ENSG00000145087	STXBP5L
ENSG00000176845	METRNL
ENSG00000104823	ECH1
ENSG00000149926	FAM57B
ENSG00000188163	FAM166A
ENSG00000178685	PARP10
ENSG00000163710	PCOLCE2
ENSG00000144231	POLR2D
ENSG00000170846	AC093323.3
ENSG00000215845	TSTD1
ENSG00000272674	PCDHB16
ENSG00000162298	SYVN1
ENSG00000247157	LINC01252
ENSG00000196071	OR2L13
ENSG00000258670	RP11-1042B17.3
ENSG00000166800	LDHAL6A
ENSG00000197457	STMN3
ENSG00000175170	FAM182B
ENSG00000164327	RICTOR
ENSG00000176022	B3GALT6
ENSG00000100426	ZBED4
ENSG00000264204	AGAP7P
ENSG00000156381	ANKRD9
ENSG00000125875	TBC1D20
ENSG00000237499	RP11-356I2.4
ENSG00000172725	CORO1B
ENSG00000141698	NT5C3B
ENSG00000269486	CTC-360G5.9
ENSG00000164574	GALNT10
ENSG00000198964	SGMS1
ENSG00000212127	TAS2R14
ENSG00000093072	CECR1
ENSG00000242485	MRPL20
ENSG00000187741	FANCA
ENSG00000171130	ATP6V0E2
ENSG00000226742	HSBP1L1
ENSG00000174718	KIAA1551
ENSG00000185187	SIGIRR
ENSG00000173226	IQCB1
ENSG00000101255	TRIB3
ENSG00000121691	CAT
ENSG00000254852	NPIPA2
ENSG00000124104	SNX21
ENSG00000251141	RP11-53O19.1
ENSG00000261126	RP11-795F19.1
ENSG00000160948	VPS28
ENSG00000214279	SCART1
ENSG00000109107	ALDOC
ENSG00000140995	DEF8
ENSG00000125618	PAX8
ENSG00000204653	ASPDH
ENSG00000120696	KBTBD7
ENSG00000268912	CTD-2619J13.17
ENSG00000228903	RASA4CP
ENSG00000279970	RP11-299G20.5
ENSG00000065154	OAT
ENSG00000260261	RP11-480A16.1
ENSG00000134285	FKBP11
ENSG00000196663	TECPR2
ENSG00000267750	RUNDC3A-AS1
ENSG00000109063	MYH3
ENSG00000184224	C11orf72
ENSG00000230658	KLHL7-AS1
ENSG00000075826	SEC31B
ENSG00000165661	QSOX2
ENSG00000189266	PNRC2
ENSG00000144771	LRTM1
ENSG00000236209	AC104135.2
ENSG00000130803	ZNF317
ENSG00000256274	TAS2R64P
ENSG00000196381	ZNF781
ENSG00000254614	AP003068.23
ENSG00000261305	RP4-584D14.7
ENSG00000280047	CTC-463A16.1
ENSG00000063854	HAGH
ENSG00000142082	SIRT3
ENSG00000189223	PAX8-AS1
ENSG00000121417	ZNF211
ENSG00000166436	TRIM66
ENSG00000196118	CCDC189
ENSG00000160194	NDUFV3
ENSG00000188000	OR7D2
ENSG00000169220	RGS14
ENSG00000006282	SPATA20
ENSG00000154127	UBASH3B
ENSG00000070495	JMJD6
ENSG00000144134	RABL2A
ENSG00000100884	CPNE6
ENSG00000166452	AKIP1
ENSG00000213221	DNLZ
ENSG00000204514	ZNF814
ENSG00000246477	AF131216.6
ENSG00000134198	TSPAN2
ENSG00000114503	NCBP2
ENSG00000178201	VN1R1
ENSG00000214435	AS3MT
ENSG00000108387	SEPTIN4
ENSG00000148339	SLC25A25
ENSG00000185324	CDK10
ENSG00000151725	CENPU
ENSG00000131849	ZNF132
ENSG00000161265	U2AF1L4
ENSG00000187024	PTRH1
ENSG00000187783	TMEM72
ENSG00000140400	MAN2C1
ENSG00000130414	NDUFA10
ENSG00000203663	OR2L2
ENSG00000100583	SAMD15
ENSG00000262075	DKFZP434A062
ENSG00000224812	TMEM72-AS1
ENSG00000165406	MARCHF8
ENSG00000136026	CKAP4
ENSG00000232098	CTD-2619J13.14
ENSG00000114812	VIPR1
ENSG00000169224	GCSAML
ENSG00000251474	RPL32P3
ENSG00000166321	NUDT13
ENSG00000181754	AMIGO1
ENSG00000196683	TOMM7
ENSG00000182544	MFSD5
ENSG00000132676	DAP3
ENSG00000279088	RP11-574K11.24
ENSG00000042286	AIFM2
ENSG00000196132	MYT1
ENSG00000181396	OGFOD3
ENSG00000163016	ALMS1P1
ENSG00000066136	NFYC
ENSG00000238105	GOLGA2P5
ENSG00000257218	GATC
ENSG00000198920	KIAA0753
ENSG00000188611	ASAH2
ENSG00000056291	NPFFR2
ENSG00000183506	PI4KAP2
ENSG00000168938	PPIC
ENSG00000136108	CKAP2
ENSG00000254860	TMEM9B-AS1
ENSG00000171574	ZNF584
ENSG00000256783	RP11-503G7.1
ENSG00000164649	CDCA7L
ENSG00000124098	FAM210B
ENSG00000141580	WDR45B
ENSG00000108829	LRRC59
ENSG00000138074	SLC5A6
ENSG00000227533	SLC2A1-AS1
ENSG00000092140	G2E3
ENSG00000136104	RNASEH2B
ENSG00000117602	RCAN3
ENSG00000177302	TOP3A
ENSG00000150764	DIXDC1
ENSG00000140323	DISP2
ENSG00000100413	POLR3H
ENSG00000161036	LRWD1
ENSG00000267127	RP11-795F19.5
ENSG00000120262	CCDC170
ENSG00000235381	RP11-477D19.2
ENSG00000184840	TMED9
ENSG00000175711	B3GNTL1
ENSG00000259520	CTD-2651B20.3
ENSG00000082684	SEMA5B
ENSG00000120324	PCDHB10
ENSG00000178222	RNF212
ENSG00000115241	PPM1G
ENSG00000278962	RP11-399B17.1
ENSG00000180104	EXOC3
ENSG00000170037	CNTROB
ENSG00000069869	NEDD4
ENSG00000197958	RPL12
ENSG00000133069	TMCC2
ENSG00000122687	MRM2
ENSG00000273154	RP4-583P15.15
ENSG00000161609	CCDC155
ENSG00000185627	PSMD13
ENSG00000188089	PLA2G4E
ENSG00000161618	ALDH16A1
ENSG00000124641	MED20
ENSG00000125814	NAPB
ENSG00000116906	GNPAT
ENSG00000257698	RP11-620J15.3
ENSG00000119673	ACOT2
ENSG00000177697	CD151
ENSG00000132740	IGHMBP2
ENSG00000214135	AC024560.3
ENSG00000059691	GATB
ENSG00000037637	FBXO42
ENSG00000259005	RP3-449M8.6
ENSG00000232850	PTGES2-AS1
ENSG00000279672	CMB9-55F22.1
ENSG00000106609	TMEM248
ENSG00000100218	RSPH14
ENSG00000163131	CTSS
ENSG00000176155	CCDC57
ENSG00000111786	SRSF9
ENSG00000075292	ZNF638
ENSG00000121310	ECHDC2
ENSG00000072609	CHFR
ENSG00000272821	CTA-384D8.36
ENSG00000109919	MTCH2
ENSG00000090615	GOLGA3
ENSG00000143162	CREG1
ENSG00000104899	AMH
ENSG00000105146	AURKC
ENSG00000050748	MAPK9
ENSG00000179163	FUCA1
ENSG00000260487	RP11-297C4.3
ENSG00000120322	PCDHB8
ENSG00000274373	RP13-714J12.1
ENSG00000108384	RAD51C
ENSG00000154358	OBSCN
ENSG00000140104	C14orf79
ENSG00000079785	DDX1
ENSG00000165905	LARGE2
ENSG00000160117	ANKLE1
ENSG00000197345	MRPL21
ENSG00000099968	BCL2L13
ENSG00000108826	MRPL27
ENSG00000173421	CCDC36
ENSG00000197355	UAP1L1
ENSG00000221823	PPP3R1
ENSG00000102858	MGRN1
ENSG00000104783	KCNN4
ENSG00000130770	ATPIF1
ENSG00000230513	THAP7-AS1
ENSG00000143786	CNIH3
ENSG00000126005	MMP24-AS1
ENSG00000188785	ZNF548
ENSG00000279253	RP4-614O4.13
ENSG00000259479	SORD2P
ENSG00000178467	P4HTM
ENSG00000124713	GNMT
ENSG00000116157	GPX7
ENSG00000183783	KCTD8
ENSG00000051620	HEBP2
ENSG00000100997	ABHD12
ENSG00000159871	LYPD5
ENSG00000170959	DCDC1
ENSG00000223797	ENTPD3-AS1
ENSG00000279744	RP13-20L14.10
ENSG00000240288	GHRLOS
ENSG00000132964	CDK8
ENSG00000110514	MADD
ENSG00000149548	CCDC15
ENSG00000272655	POLR2J4
ENSG00000248508	SRP14-AS1
ENSG00000163170	BOLA3
ENSG00000179979	CRIPAK
ENSG00000176915	ANKLE2
ENSG00000254093	PINX1
ENSG00000217702	RP11-287D1.4
ENSG00000084207	GSTP1
ENSG00000187097	ENTPD5
ENSG00000171757	LRRC34
ENSG00000162913	C1orf145
ENSG00000255119	RP11-655M14.12
ENSG00000071894	CPSF1
ENSG00000165555	NOXRED1
ENSG00000159208	CIART
ENSG00000135655	USP15
ENSG00000261332	RP11-297C4.1
ENSG00000204138	PHACTR4
ENSG00000269984	RP11-362K14.5
ENSG00000113838	TBCCD1
ENSG00000179743	FLJ37453
ENSG00000124523	SIRT5
ENSG00000188582	PAQR9
ENSG00000095485	CWF19L1
ENSG00000253716	MINCR
ENSG00000164543	STK17A
ENSG00000007237	GAS7
ENSG00000249087	ZNF436-AS1
ENSG00000163913	IFT122
ENSG00000030066	NUP160
ENSG00000233392	AC104809.4
ENSG00000167792	NDUFV1
ENSG00000225138	CTD-2228K2.7
ENSG00000157379	DHRS1
ENSG00000073067	CYP2W1
ENSG00000241570	PAQR9-AS1
ENSG00000131203	IDO1
ENSG00000230074	RP11-195F19.9
ENSG00000188629	ZNF177
ENSG00000152556	PFKM
ENSG00000256875	RP11-503G7.2
ENSG00000163703	CRELD1
ENSG00000163354	DCST2
ENSG00000101367	MAPRE1
ENSG00000275358	RP5-1025A1.3
ENSG00000213246	SUPT4H1
ENSG00000140043	PTGR2
ENSG00000100034	PPM1F
ENSG00000187049	TMEM216
ENSG00000267543	RP11-666A8.7
ENSG00000117640	MTFR1L
ENSG00000042088	TDP1
ENSG00000171903	CYP4F11
ENSG00000120868	APAF1
ENSG00000104870	FCGRT
ENSG00000182993	C12orf60
ENSG00000142089	IFITM3
ENSG00000235618	FAM21EP
ENSG00000272936	RP11-700J17.2
ENSG00000281649	EBLN3
ENSG00000170581	STAT2
ENSG00000223745	CCDC18-AS1
ENSG00000188321	ZNF559
ENSG00000267640	CTD-2554C21.2
ENSG00000257800	FNBP1P1
ENSG00000164751	PEX2
ENSG00000167861	HID1
ENSG00000145246	ATP10D
ENSG00000188672	RHCE
ENSG00000005020	SKAP2
ENSG00000233820	RP11-535M15.2
ENSG00000114978	MOB1A
ENSG00000153406	NMRAL1
ENSG00000270804	CTD-2583A14.11
ENSG00000075413	MARK3
ENSG00000241549	GUSBP2
ENSG00000188185	LINC00265
ENSG00000119661	DNAL1
ENSG00000167528	ZNF641
ENSG00000064652	SNX24
ENSG00000105258	POLR2I
ENSG00000158882	TOMM40L
ENSG00000173480	ZNF417
ENSG00000135828	RNASEL
ENSG00000123179	EBPL
ENSG00000105483	CARD8
ENSG00000214078	CPNE1
ENSG00000173852	DPY19L1
ENSG00000149089	APIP
ENSG00000224086	LL22NC03-86G7.1
ENSG00000213625	LEPROT
ENSG00000184465	WDR27
ENSG00000136682	CBWD2
ENSG00000273032	DGCR9
ENSG00000259221	CTD-2050N2.1
ENSG00000104738	MCM4
ENSG00000255468	RP11-867G23.8
ENSG00000081248	CACNA1S
ENSG00000089220	PEBP1
ENSG00000070731	ST6GALNAC2
ENSG00000154316	TDH
ENSG00000183570	PCBP3
ENSG00000011638	TMEM159
ENSG00000182534	MXRA7
ENSG00000163597	SNHG16
ENSG00000198952	SMG5
ENSG00000165410	CFL2
ENSG00000117748	RPA2
ENSG00000164088	PPM1M
