# Supplementary material for: QTL mapping of human retina DNA methylation identifies 87 gene-epigenome interactions in age-related macular degeneration
Source: Nat Commun. 2024 Mar 4;15:1972. doi: 10.1038/s41467-024-46063-8 (PMC10912779; doi:10.1038/s41467-024-46063-8)
Supplement: Supplementary file 32 — Supplementary Data 29 [file 41467_2024_46063_MOESM32_ESM.xlsx]

## Sheet: Sheet1
Gene_ID	CpG	Gene_symbol	Chr	beta	se	p.value	FDR	Distance	Correlation	Biotype	TSS-variant_Distance	Type
ENSG00000183570	cg13481379	PCBP3	chr21	59.1233	2.99336	1.24e-33	4.44e-32	-2315	Negative	protein_coding	-2315	Promoter eQTMs
ENSG00000168675	cg01597553	LDLRAD4	chr18	-28.3332	3.66383	5.89e-08	1.4e-07	-1728	Negative	protein_coding	-1728	Promoter eQTMs
ENSG00000134138	cg16523643	MEIS2	chr15	14.3051	1.43508	1.08e-13	4.36e-13	213766	Positive	protein_coding	-1671	Promoter eQTMs
ENSG00000272888	cg09523278	LINC01578	chr15	-16.4918	1.55745	5.91e-15	2.71e-14	-64725	Negative	processed_transcript	-1558	Promoter eQTMs
ENSG00000161202	cg13607248	DVL3	chr3	-19.7215	2.31057	1.98e-08	4.91e-08	-1391	Negative	protein_coding	-1380	Promoter eQTMs
ENSG00000150893	cg01112805	FREM2	chr13	4.37298	0.796929	0.00043387	0.00070474	-1084	Positive	protein_coding	-1032	Promoter eQTMs
ENSG00000165495	cg08941173	PKNOX2	chr11	5.28966	0.682823	2.12e-08	5.24e-08	-388	Positive	protein_coding	-388	Promoter eQTMs
ENSG00000089154	cg05053108	GCN1	chr12	-34.4286	4.93311	7.37e-07	1.57e-06	67767	Negative	protein_coding	-259	Promoter eQTMs
ENSG00000183117	cg01247519	CSMD1	chr8	-2.38025	0.502375	0.00312881	0.00461393	2059779	Negative	protein_coding	-160	Promoter eQTMs
ENSG00000168843	cg14650167	FSTL5	chr4	-42.4532	4.87746	3.87e-12	1.35e-11	780269	Positive	protein_coding	-131	Promoter eQTMs
ENSG00000166016	cg08401981	ABTB2	chr11	-4.16122	0.384715	1.49e-13	5.94e-13	207143	Positive	protein_coding	-122	Promoter eQTMs
ENSG00000243156	cg20306533	MICAL3	chr22	15.1041	1.37749	4.4e-14	1.85e-13	236989	Positive	protein_coding	-79	Promoter eQTMs
ENSG00000186635	cg25433490	ARAP1	chr11	-9.90138	1.09594	2.74e-11	8.81e-11	108594	Negative	protein_coding	-64	Promoter eQTMs
ENSG00000169902	cg15816080	TPST1	chr7	2.57918	0.586394	0.028578	0.0372374	89	Positive	protein_coding	-29	Promoter eQTMs
ENSG00000122068	cg13526981	FYTTD1	chr3	14.5251	2.63726	9.64e-05	0.00016736	105	Positive	protein_coding	105	Promoter eQTMs
ENSG00000163539	cg17504655	CLASP2	chr3	105.774	8.37101	9.11e-20	6.77e-19	221898	Positive	protein_coding	213	Promoter eQTMs
ENSG00000173706	cg23053438	HEG1	chr3	129.572	21.7858	4.9e-05	8.75e-05	89953	Negative	protein_coding	295	Promoter eQTMs
ENSG00000179603	cg13286510	GRM8	chr7	-3.72326	0.7754	0.00240795	0.0036026	814355	Negative	protein_coding	341	Promoter eQTMs
ENSG00000198838	cg21413325	RYR3	chr15	-4.73851	0.693691	1.68e-06	3.47e-06	388	Negative	protein_coding	388	Promoter eQTMs
ENSG00000162669	cg12456433	HFM1	chr1	-4.0432	0.389022	1.59e-13	6.33e-13	143292	Negative	protein_coding	811	Promoter eQTMs
ENSG00000118007	cg09250304	STAG1	chr3	25.2731	3.54416	1.59e-07	3.62e-07	415356	Negative	protein_coding	811	Promoter eQTMs
ENSG00000111737	cg00301864	RAB35	chr12	-6.29477	0.725019	3.16e-10	9.22e-10	21569	Positive	protein_coding	834	Promoter eQTMs
ENSG00000020577	cg23939166	SAMD4A	chr14	5.05006	0.525777	5.89e-12	2.02e-11	1003	Negative	protein_coding	1003	Promoter eQTMs
ENSG00000231607	cg20863107	DLEU2	chr13	6.0618	0.501775	2.13e-15	1.02e-14	167179	Positive	antisense	1871	Promoter eQTMs
ENSG00000228340	cg11420768	MIR646HG	chr20	12.1744	0.813172	7.97e-23	8.16e-22	-1141539	Positive	lincRNA	-1141525	Distal target gene eQTMs
ENSG00000133103	cg09795308	COG6	chr13	21.3732	2.2407	2.41e-12	8.56e-12	-1115569	Negative	protein_coding	-1115569	Distal target gene eQTMs
ENSG00000151948	cg10639585	GLT1D1	chr12	2.32647	0.381126	1.05e-05	2.01e-05	-1049159	Positive	protein_coding	-1049159	Distal target gene eQTMs
ENSG00000156795	cg14909555	WDYHV1	chr8	2.11405	0.281479	1.67e-06	3.45e-06	-1023134	Positive	protein_coding	-1023134	Distal target gene eQTMs
ENSG00000149548	cg13479898	CCDC15	chr11	2.629	0.366333	6.8e-07	1.46e-06	-933430	Positive	protein_coding	-933430	Distal target gene eQTMs
ENSG00000136527	cg25449502	TRA2B	chr3	-46.6276	4.16457	1.3e-15	6.37e-15	869692	Positive	protein_coding	-846114	Distal target gene eQTMs
ENSG00000091157	cg05226967	WDR7	chr18	-28.2707	5.91844	0.00241869	0.00361744	-784338	Negative	protein_coding	-784338	Distal target gene eQTMs
ENSG00000096093	cg16611220	EFHC1	chr6	-28.9867	1.53871	2.15e-34	8.71e-33	-700043	Positive	protein_coding	-700043	Distal target gene eQTMs
ENSG00000135540	cg18472160	NHSL1	chr6	8.04652	0.447565	9.73e-29	1.92e-27	947648	Negative	protein_coding	-677120	Distal target gene eQTMs
ENSG00000164211	cg26095517	STARD4	chr5	-16.7523	2.36627	2.12e-07	4.78e-07	664994	Negative	protein_coding	-648437	Distal target gene eQTMs
ENSG00000145819	cg15910486	ARHGAP26	chr5	-11.3729	1.21383	2.43e-12	8.62e-12	-633679	Negative	protein_coding	-633672	Distal target gene eQTMs
ENSG00000157181	cg22265501	C1orf27	chr1	-6.10638	0.601885	5.32e-13	2.02e-12	-610200	Negative	protein_coding	-610200	Distal target gene eQTMs
ENSG00000148200	cg26395071	NR6A1	chr9	-3.11974	0.343502	1.98e-10	5.88e-10	857136	Negative	protein_coding	-603101	Distal target gene eQTMs
ENSG00000139220	cg01903903	PPFIA2	chr12	-28.8564	2.48094	1.97e-17	1.15e-16	1100950	Negative	protein_coding	-599372	Distal target gene eQTMs
ENSG00000183475	cg14291878	ASB7	chr15	2.43934	0.329018	8.23e-08	1.93e-07	-595877	Positive	protein_coding	-595877	Distal target gene eQTMs
ENSG00000146592	cg19249874	CREB5	chr7	-6.55909	1.30221	0.014008	0.0190007	-556599	Negative	protein_coding	-556599	Distal target gene eQTMs
ENSG00000137500	cg02645285	CCDC90B	chr11	-6.06062	0.516329	2.26e-16	1.19e-15	557665	Positive	protein_coding	-530355	Distal target gene eQTMs
ENSG00000055163	cg27117005	CYFIP2	chr5	19.1768	2.76461	3.76e-07	8.26e-07	-478528	Negative	protein_coding	-478528	Distal target gene eQTMs
ENSG00000164808	cg18923221	SPIDR	chr8	-4.44885	0.547832	1.76e-09	4.82e-09	-477590	Negative	protein_coding	-477590	Distal target gene eQTMs
ENSG00000163659	cg02181293	TIPARP	chr3	24.3821	4.90646	0.0111998	0.0154019	-450234	Positive	protein_coding	-450234	Distal target gene eQTMs
ENSG00000133104	cg11105980	SPG20	chr13	-55.9425	9.01785	2.2e-05	4.07e-05	517606	Negative	protein_coding	-449064	Distal target gene eQTMs
ENSG00000111906	cg08923450	HDDC2	chr6	-13.9655	2.86517	0.00191717	0.00289968	529043	Negative	protein_coding	-446927	Distal target gene eQTMs
ENSG00000069018	cg08531890	TRPC7	chr5	-1.05881	0.211547	0.00341926	0.00502285	563606	Negative	protein_coding	-411389	Distal target gene eQTMs
ENSG00000039123	cg21173440	SKIV2L2	chr5	18.6833	2.19639	2.14e-10	6.33e-10	-404395	Positive	protein_coding	-404624	Distal target gene eQTMs
ENSG00000144401	cg18441479	METTL21A	chr2	-0.85832	0.161308	0.00376992	0.00550331	445001	Positive	protein_coding	-399704	Distal target gene eQTMs
ENSG00000118705	cg06198069	RPN2	chr20	38.8425	7.54494	0.00077409	0.00122333	-344372	Positive	protein_coding	-344372	Distal target gene eQTMs
ENSG00000165714	cg18803655	BORCS5	chr12	2.35924	0.357971	2.12e-06	4.33e-06	-339736	Positive	protein_coding	-339735	Distal target gene eQTMs
ENSG00000121644	cg06992877	DESI2	chr1	-8.36108	0.865966	1.21e-12	4.44e-12	-317091	Negative	protein_coding	-317259	Distal target gene eQTMs
ENSG00000182108	cg09567644	DEXI	chr16	2.54614	0.243612	1.69e-13	6.72e-13	327615	Positive	protein_coding	-314046	Distal target gene eQTMs
ENSG00000111817	cg25351588	DSE	chr6	-2.82864	0.499319	0.00011066	0.00019063	-304156	Negative	protein_coding	-304156	Distal target gene eQTMs
ENSG00000261460	cg10324413	RP11-106M3.3	chr15	4.80529	0.856166	0.0001408	0.00023968	-293254	Positive	antisense	-293254	Distal target gene eQTMs
ENSG00000111554	cg19901889	MDM1	chr12	20.0473	1.481	9.92e-22	8.99e-21	338430	Positive	protein_coding	-278492	Distal target gene eQTMs
ENSG00000101391	cg10054127	CDK5RAP1	chr20	16.6954	1.16276	2.09e-21	1.82e-20	315466	Positive	protein_coding	-272744	Distal target gene eQTMs
ENSG00000137218	cg00034019	FRS3	chr6	-4.02234	0.298844	2.29e-21	1.99e-20	280314	Negative	protein_coding	-263948	Distal target gene eQTMs
ENSG00000234444	cg10988062	ZNF736	chr7	-13.6454	1.3659	1.49e-14	6.57e-14	-255597	Positive	protein_coding	-255597	Distal target gene eQTMs
ENSG00000175193	cg09948343	PARL	chr3	7.95381	1.64518	0.005233	0.00751758	308037	Negative	protein_coding	-252375	Distal target gene eQTMs
ENSG00000128512	cg04515677	DOCK4	chr7	10.359	1.31409	3.14e-09	8.41e-09	724329	Positive	protein_coding	-244028	Distal target gene eQTMs
ENSG00000176834	cg10934821	VSIG10	chr12	1.27314	0.224336	0.00044107	0.00071584	308250	Positive	protein_coding	-235817	Distal target gene eQTMs
ENSG00000163673	cg04841293	DCLK3	chr3	1.74643	0.372024	0.00281174	0.00417214	280115	Positive	protein_coding	-228188	Distal target gene eQTMs
ENSG00000092439	cg17123237	TRPM7	chr15	13.2408	1.45948	1.35e-09	3.73e-09	356045	Positive	protein_coding	-221703	Distal target gene eQTMs
ENSG00000251201	cg04075012	TMED7-TICAM2	chr5	-4.34086	0.35549	1.07e-18	7.11e-18	262317	Negative	protein_coding	-214798	Distal target gene eQTMs
ENSG00000151490	cg12601353	PTPRO	chr12	-6.42801	1.56353	0.0253864	0.0333134	-212266	Negative	protein_coding	-212377	Distal target gene eQTMs
ENSG00000177788	cg05469530	RP5-1061H20.4	chr1	4.20388	0.124148	3.57e-59	7.84e-56	225311	Positive	lincRNA	-211175	Distal target gene eQTMs
ENSG00000254585	cg10920799	MAGEL2	chr15	2.0529	0.155394	6.31e-21	5.25e-20	212559	Positive	protein_coding	-208267	Distal target gene eQTMs
ENSG00000198053	cg13077517	SIRPA	chr20	-26.714	6.16882	0.0277114	0.0361995	-207622	Positive	protein_coding	-207622	Distal target gene eQTMs
ENSG00000101294	cg11265696	HM13	chr20	7.74114	0.592523	1.54e-19	1.12e-18	-203414	Positive	protein_coding	-203396	Distal target gene eQTMs
ENSG00000128609	cg21335509	NDUFA5	chr7	-19.9793	2.4006	2.48e-10	7.3e-10	212892	Positive	protein_coding	-191634	Distal target gene eQTMs
ENSG00000115525	cg01155138	ST3GAL5	chr2	-19.4957	2.81492	0.00039175	0.00063904	242000	Negative	protein_coding	-190106	Distal target gene eQTMs
ENSG00000185420	cg02951974	SMYD3	chr1	-0.723997	0.113537	1.13e-05	2.15e-05	947312	Negative	protein_coding	-189342	Distal target gene eQTMs
ENSG00000060709	cg27547422	RIMBP2	chr12	-11.6106	1.44513	4.72e-08	1.13e-07	306912	Negative	protein_coding	-185132	Distal target gene eQTMs
ENSG00000196290	cg15144697	NIF3L1	chr2	-4.83995	0.440477	5.61e-15	2.58e-14	-181924	Negative	protein_coding	-181924	Distal target gene eQTMs
ENSG00000162585	cg17444015	FAAP20	chr1	10.1986	0.502263	2.46e-33	8.46e-32	207081	Positive	protein_coding	-178822	Distal target gene eQTMs
ENSG00000273297	cg08061100	RP11-38M8.1	chr7	0.335484	0.0357333	1.01e-10	3.07e-10	237884	Negative	lincRNA	-174168	Distal target gene eQTMs
ENSG00000267280	cg01398008	TBX2-AS1	chr17	5.27111	0.495376	1.62e-11	5.32e-11	186528	Negative	antisense	-168429	Distal target gene eQTMs
ENSG00000065518	cg24198977	NDUFB4	chr3	-6.54415	0.46801	1.65e-22	1.63e-21	-146034	Positive	protein_coding	-146053	Distal target gene eQTMs
ENSG00000111231	cg21763952	GPN3	chr12	8.44676	0.666783	2.5e-18	1.61e-17	161406	Negative	protein_coding	-144624	Distal target gene eQTMs
ENSG00000133703	cg11853986	KRAS	chr12	55.0654	8.21656	1.86e-06	3.82e-06	181474	Positive	protein_coding	-135327	Distal target gene eQTMs
ENSG00000110700	cg09163686	RPS13	chr11	82.3667	4.03243	7.1e-36	3.46e-34	133727	Positive	protein_coding	-130328	Distal target gene eQTMs
ENSG00000118420	cg04397883	UBE3D	chr6	-0.81684	0.097348	1.1e-10	3.34e-10	301734	Negative	protein_coding	-128283	Distal target gene eQTMs
ENSG00000172262	cg16986441	ZNF131	chr5	3.94991	0.515217	3.72e-08	9e-08	-127596	Positive	protein_coding	-127596	Distal target gene eQTMs
ENSG00000168234	cg12972164	TTC39C	chr18	-40.8564	6.28856	8.52e-06	1.64e-05	-122988	Negative	protein_coding	-122988	Distal target gene eQTMs
ENSG00000125841	cg15265675	NRSN2	chr20	-33.7407	2.64322	1.67e-17	9.86e-17	-115876	Negative	protein_coding	-115876	Distal target gene eQTMs
ENSG00000183853	cg12609498	KIRREL	chr1	-6.52178	0.884953	7.85e-08	1.84e-07	-109848	Negative	protein_coding	-109848	Distal target gene eQTMs
ENSG00000123505	cg10920427	AMD1	chr6	40.6675	6.14923	2.66e-06	5.38e-06	-107390	Negative	protein_coding	-107390	Distal target gene eQTMs
ENSG00000117000	cg23710710	RLF	chr1	-25.6886	2.3694	1.24e-13	4.97e-13	-96543	Negative	protein_coding	-96557	Distal target gene eQTMs
ENSG00000058335	cg20715809	RASGRF1	chr15	-24.3379	3.33917	2.12e-06	4.33e-06	219195	Positive	protein_coding	-88369	Distal target gene eQTMs
ENSG00000074054	cg16605590	CLASP1	chr2	34.5429	3.41695	2.91e-13	1.13e-12	398881	Positive	protein_coding	-87070	Distal target gene eQTMs
ENSG00000141452	cg19385725	C18orf8	chr18	-3.44761	0.541302	2.55e-06	5.17e-06	-82739	Negative	protein_coding	-82739	Distal target gene eQTMs
ENSG00000055211	cg23518220	GINM1	chr6	3.42757	0.7019	0.00402525	0.0058587	-82596	Positive	protein_coding	-82596	Distal target gene eQTMs
ENSG00000129460	cg11723850	NGDN	chr14	5.86002	0.383752	3.21e-24	3.85e-23	-81155	Positive	protein_coding	-81156	Distal target gene eQTMs
ENSG00000120820	cg22024295	GLT8D2	chr12	-0.671463	0.131581	0.0156082	0.0210428	145317	Negative	protein_coding	-70118	Distal target gene eQTMs
ENSG00000130699	cg13197551	TAF4	chr20	7.78663	1.19644	8.31e-06	1.61e-05	181432	Positive	protein_coding	-69091	Distal target gene eQTMs
ENSG00000124145	cg18287701	SDC4	chr20	-10.7504	2.49276	0.0315341	0.0408439	90400	Negative	protein_coding	-67264	Distal target gene eQTMs
ENSG00000227906	cg10282061	SNAP25-AS1	chr20	0.630051	0.0506294	3.58e-19	2.5e-18	427894	Negative	antisense	-65499	Distal target gene eQTMs
ENSG00000165678	cg19709886	GHITM	chr10	-48.5661	5.03425	2.05e-12	7.33e-12	-61916	Negative	protein_coding	-61985	Distal target gene eQTMs
ENSG00000116128	cg21813591	BCL9	chr1	6.62952	0.594247	1.21e-16	6.54e-16	-58244	Positive	protein_coding	-58333	Distal target gene eQTMs
ENSG00000186814	cg12725284	ZSCAN30	chr18	-9.3527	0.655391	6.91e-24	7.98e-23	93526	Positive	protein_coding	-54339	Distal target gene eQTMs
ENSG00000149499	cg08462117	EML3	chr11	-27.7117	3.5202	7.72e-08	1.81e-07	62893	Negative	protein_coding	-52346	Distal target gene eQTMs
ENSG00000099338	cg18482256	CATSPERG	chr19	-0.828272	0.111032	1.39e-06	2.89e-06	-38626	Negative	protein_coding	-38626	Distal target gene eQTMs
ENSG00000178127	cg07376838	NDUFV2	chr18	11.2342	1.36189	1.67e-09	4.59e-09	-34811	Negative	protein_coding	-34811	Distal target gene eQTMs
ENSG00000001084	cg22877288	GCLC	chr6	-4.62802	0.553675	1.85e-09	5.06e-09	153906	Negative	protein_coding	-34277	Distal target gene eQTMs
ENSG00000204856	cg11175477	FAM216A	chr12	4.57927	0.897939	0.00086489	0.0013579	-33699	Positive	protein_coding	-33750	Distal target gene eQTMs
ENSG00000149823	cg16691477	VPS51	chr11	28.209	1.17143	5.48e-42	5.84e-40	-32994	Negative	protein_coding	-32994	Distal target gene eQTMs
ENSG00000068615	cg22508597	REEP1	chr2	-5.37801	0.924203	0.00016346	0.00027665	154314	Negative	protein_coding	-30224	Distal target gene eQTMs
ENSG00000163389	cg16192203	POGLUT1	chr3	-2.75478	0.268215	1.49e-15	7.26e-15	-29408	Negative	protein_coding	-29433	Distal target gene eQTMs
ENSG00000132640	cg17407259	BTBD3	chr20	-15.5808	1.73002	1.33e-11	4.41e-11	-28712	Negative	protein_coding	-28712	Distal target gene eQTMs
ENSG00000136141	cg00191181	LRCH1	chr13	-5.79737	0.41821	6.18e-24	7.21e-23	-22756	Negative	protein_coding	-22756	Distal target gene eQTMs
ENSG00000084207	cg00636119	GSTP1	chr11	20.2276	3.19156	2.49e-05	4.58e-05	-21886	Positive	protein_coding	-21886	Distal target gene eQTMs
ENSG00000241570	cg00831726	PAQR9-AS1	chr3	-2.12451	0.219453	5.12e-13	1.94e-12	-21384	Negative	antisense	-21384	Distal target gene eQTMs
ENSG00000188582	cg00831726	PAQR9	chr3	-1.42141	0.139098	8.59e-15	3.88e-14	32870	Negative	protein_coding	-18352	Distal target gene eQTMs
ENSG00000135596	cg20560186	MICAL1	chr6	-20.9365	4.22297	0.00251421	0.00375232	38838	Negative	protein_coding	-16932	Distal target gene eQTMs
ENSG00000171552	cg03352975	BCL2L1	chr20	-15.4865	3.28095	0.00438033	0.00635289	75174	Positive	protein_coding	-15637	Distal target gene eQTMs
ENSG00000158555	cg11169255	GDPD5	chr11	-79.0543	10.4377	7.46e-08	1.75e-07	103342	Positive	protein_coding	-12079	Distal target gene eQTMs
ENSG00000177103	cg25894551	DSCAML1	chr11	-40.6501	5.26485	2.75e-08	6.73e-08	401363	Positive	protein_coding	-11611	Distal target gene eQTMs
ENSG00000143641	cg03525122	GALNT2	chr1	9.4994	2.03033	0.00705286	0.00996495	-10046	Positive	protein_coding	-10046	Distal target gene eQTMs
ENSG00000151692	cg18115488	RNF144A	chr2	-23.3146	1.69231	4.28e-21	3.61e-20	-9693	Negative	protein_coding	-9713	Distal target gene eQTMs
ENSG00000183098	cg17351439	GPC6	chr13	-6.39284	0.888736	1.27e-07	2.92e-07	-9007	Negative	protein_coding	-8972	Distal target gene eQTMs
ENSG00000253554	cg07893575	RP11-32K4.1	chr8	0.310997	0.0176553	3.99e-29	8.12e-28	690015	Negative	antisense	-8636	Distal target gene eQTMs
ENSG00000109572	cg14871650	CLCN3	chr4	128.586	20.4354	5.57e-06	1.09e-05	-7884	Positive	protein_coding	-7884	Distal target gene eQTMs
ENSG00000063244	cg23537415	U2AF2	chr19	24.7281	2.47177	4.12e-13	1.58e-12	-3933	Positive	protein_coding	-3933	Distal target gene eQTMs
ENSG00000073111	cg15600124	MCM2	chr3	-2.30302	0.245686	2.54e-11	8.19e-11	2896	Negative	protein_coding	2709	Distal target gene eQTMs
ENSG00000152952	cg22234419	PLOD2	chr3	-71.5263	13.1425	0.00035047	0.00057453	88680	Negative	protein_coding	5533	Distal target gene eQTMs
ENSG00000181322	cg16364085	NME9	chr3	-0.856532	0.110376	9.89e-09	2.52e-08	62861	Negative	protein_coding	5588	Distal target gene eQTMs
ENSG00000163964	cg09564068	PIGX	chr3	7.66817	1.27476	7.69e-05	0.00013494	6998	Positive	protein_coding	6998	Distal target gene eQTMs
ENSG00000140022	cg24014795	STON2	chr14	-5.83746	0.995828	2.88e-05	5.27e-05	166935	Positive	protein_coding	8874	Distal target gene eQTMs
ENSG00000108641	cg00116463	B9D1	chr17	8.58031	0.420825	4.64e-33	1.52e-31	28822	Negative	protein_coding	15052	Distal target gene eQTMs
ENSG00000158234	cg24334259	FAIM	chr3	28.868	3.42555	9.59e-10	2.69e-09	16032	Negative	protein_coding	16032	Distal target gene eQTMs
ENSG00000177542	cg23660999	SLC25A22	chr11	-34.9988	1.60871	8.21e-36	3.96e-34	-12700	Negative	protein_coding	20558	Distal target gene eQTMs
ENSG00000175970	cg08036850	UNC119B	chr12	14.5184	0.86718	9.94e-29	1.96e-27	23384	Positive	protein_coding	23361	Distal target gene eQTMs
ENSG00000086062	cg19561508	B4GALT1	chr9	-24.1001	2.96395	6.72e-09	1.74e-08	36786	Negative	protein_coding	26488	Distal target gene eQTMs
ENSG00000120832	cg01290885	MTERF2	chr12	-10.6203	0.572457	9.25e-33	2.85e-31	-20122	Positive	protein_coding	30011	Distal target gene eQTMs
ENSG00000177565	cg08977130	TBL1XR1	chr3	-51.4929	8.65231	4.76e-05	8.51e-05	177971	Negative	protein_coding	30689	Distal target gene eQTMs
ENSG00000182093	cg24641125	WRB	chr21	37.2093	4.09784	7.93e-11	2.44e-10	28494	Positive	protein_coding	31040	Distal target gene eQTMs
ENSG00000166716	cg05905876	ZNF592	chr15	-13.1472	3.21774	0.0283943	0.0370228	31999	Positive	protein_coding	32042	Distal target gene eQTMs
ENSG00000120253	cg24994350	NUP43	chr6	3.80133	0.819504	0.00706695	0.00998192	-6751	Negative	protein_coding	32101	Distal target gene eQTMs
ENSG00000188352	cg27041724	FOCAD	chr9	-4.67042	0.595835	3.94e-09	1.04e-08	34603	Positive	protein_coding	34603	Distal target gene eQTMs
ENSG00000117394	cg00045275	SLC2A1	chr1	258.339	50.8601	0.00909739	0.0126533	-1403	Positive	protein_coding	35201	Distal target gene eQTMs
ENSG00000243660	cg27641141	ZNF487	chr10	-2.05794	0.164873	5.48e-19	3.75e-18	39379	Negative	protein_coding	39379	Distal target gene eQTMs
ENSG00000064393	cg16346806	HIPK2	chr7	62.3766	4.89636	1.04e-17	6.29e-17	170783	Negative	protein_coding	45425	Distal target gene eQTMs
ENSG00000012061	cg20467502	ERCC1	chr19	-7.89792	1.26205	1.99e-05	3.7e-05	21317	Negative	protein_coding	50178	Distal target gene eQTMs
ENSG00000178607	cg03031503	ERN1	chr17	-10.5595	1.52651	3.36e-06	6.72e-06	41223	Negative	protein_coding	50454	Distal target gene eQTMs
ENSG00000114054	cg26687499	PCCB	chr3	-3.72416	0.373934	9.14e-14	3.72e-13	54407	Negative	protein_coding	54373	Distal target gene eQTMs
ENSG00000250510	cg24679411	GPR162	chr12	17.5252	1.77271	3.02e-11	9.66e-11	54602	Positive	protein_coding	54523	Distal target gene eQTMs
ENSG00000137055	cg00368747	PLAA	chr9	7.66228	1.51818	0.00040288	0.00065677	-10518	Positive	protein_coding	54609	Distal target gene eQTMs
ENSG00000203709	cg05652609	C1orf132	chr1	-26.716	2.48132	5.87e-14	2.44e-13	22468	Positive	lincRNA	55110	Distal target gene eQTMs
ENSG00000110107	cg03700121	PRPF19	chr11	12.9856	1.38863	5.93e-11	1.85e-10	-48016	Negative	protein_coding	64057	Distal target gene eQTMs
ENSG00000125744	cg20467502	RTN2	chr19	-5.14909	0.53724	5.53e-12	1.9e-11	-56644	Negative	protein_coding	68411	Distal target gene eQTMs
ENSG00000100024	cg00108569	UPB1	chr22	1.19513	0.21588	0.0002504	0.00041622	70211	Positive	protein_coding	70211	Distal target gene eQTMs
ENSG00000198909	cg07772818	MAP3K3	chr17	-9.19239	1.70353	0.00034585	0.00056727	72093	Negative	protein_coding	72093	Distal target gene eQTMs
ENSG00000105404	cg05948588	RABAC1	chr19	-6.30696	0.39489	2.77e-23	2.98e-22	-73521	Positive	protein_coding	76230	Distal target gene eQTMs
ENSG00000100983	cg23520245	GSS	chr20	5.31643	0.616065	1.93e-09	5.27e-09	-55667	Positive	protein_coding	83052	Distal target gene eQTMs
ENSG00000128294	cg09163702	TPST2	chr22	-1.62926	0.279137	6.3e-05	0.00011145	-9450	Negative	protein_coding	84171	Distal target gene eQTMs
ENSG00000173226	cg18861827	IQCB1	chr3	-9.81664	0.628559	4.51e-27	7.44e-26	-19440	Negative	protein_coding	84758	Distal target gene eQTMs
ENSG00000165494	cg25402945	PCF11	chr11	-19.7213	1.39314	9.37e-26	1.33e-24	85500	Negative	protein_coding	85500	Distal target gene eQTMs
ENSG00000253477	cg12817575	RP11-1C8.4	chr8	-0.449175	0.0737137	1.43e-05	2.7e-05	-69034	Negative	antisense	87312	Distal target gene eQTMs
ENSG00000099954	cg03730966	CECR2	chr22	-26.2797	2.70975	5.94e-13	2.24e-12	98819	Negative	protein_coding	98819	Distal target gene eQTMs
ENSG00000101442	cg16666964	ACTR5	chr20	2.26818	0.48965	0.00401492	0.00584415	102411	Positive	protein_coding	102393	Distal target gene eQTMs
ENSG00000103942	cg16040341	HOMER2	chr15	-6.50968	0.924186	0.00013655	0.00023281	38586	Negative	protein_coding	110621	Distal target gene eQTMs
ENSG00000197168	cg07148139	NEK5	chr13	-2.37784	0.41837	0.0015241	0.00233206	-21934	Negative	protein_coding	117401	Distal target gene eQTMs
ENSG00000231738	cg13670601	TSPAN19	chr12	-4.33978	0.331732	4.71e-22	4.44e-21	-102682	Negative	protein_coding	124648	Distal target gene eQTMs
ENSG00000154723	cg24388771	ATP5J	chr21	-17.2507	0.990124	7.48e-31	1.86e-29	-108320	Negative	protein_coding	127490	Distal target gene eQTMs
ENSG00000165516	cg10516683	KLHDC2	chr14	29.2065	1.89838	6.99e-24	8.07e-23	132842	Positive	protein_coding	132320	Distal target gene eQTMs
ENSG00000099999	cg24062706	RNF215	chr22	2.20642	0.36524	6.42e-05	0.00011348	-105876	Positive	protein_coding	158836	Distal target gene eQTMs
ENSG00000162836	cg17697306	ACP6	chr1	-2.20718	0.226679	1.7e-12	6.13e-12	-134548	Positive	protein_coding	175392	Distal target gene eQTMs
ENSG00000115756	cg05515713	HPCAL1	chr2	-27.5021	1.55144	3.32e-29	6.82e-28	180582	Positive	protein_coding	180582	Distal target gene eQTMs
ENSG00000106462	cg19391535	EZH2	chr7	-4.40449	0.260599	2.98e-27	5.01e-26	-106455	Negative	protein_coding	183393	Distal target gene eQTMs
ENSG00000162601	cg21488113	MYSM1	chr1	-17.3216	1.38366	2.01e-19	1.44e-18	-127394	Negative	protein_coding	184046	Distal target gene eQTMs
ENSG00000089057	cg05081497	SLC23A2	chr20	-60.1286	9.2681	5.27e-06	1.04e-05	-28292	Negative	protein_coding	186229	Distal target gene eQTMs
ENSG00000239219	cg23036508	RP11-379K17.4	chr3	-3.21274	0.413768	0.0010336	0.00161228	-174116	Negative	antisense	201497	Distal target gene eQTMs
ENSG00000138495	cg02044738	COX17	chr3	-5.612	0.45848	3.49e-19	2.44e-18	-190980	Negative	protein_coding	213921	Distal target gene eQTMs
ENSG00000116209	cg26832062	TMEM59	chr1	32.4405	3.18297	3.67e-13	1.41e-12	-188502	Positive	protein_coding	215325	Distal target gene eQTMs
ENSG00000102796	cg06659380	DHRS12	chr13	2.59044	0.492422	0.00069536	0.00110337	-179525	Positive	protein_coding	215689	Distal target gene eQTMs
ENSG00000165525	cg10516683	NEMF	chr14	10.7419	1.48602	9.89e-07	2.09e-06	-146795	Positive	protein_coding	217915	Distal target gene eQTMs
ENSG00000109118	cg14557909	PHF12	chr17	-10.1821	1.66385	4.34e-05	7.79e-05	-176761	Negative	protein_coding	223282	Distal target gene eQTMs
ENSG00000129055	cg04945511	ANAPC13	chr3	12.6224	1.36445	7.2e-12	2.45e-11	-227492	Negative	protein_coding	236502	Distal target gene eQTMs
ENSG00000111707	cg05696801	SUDS3	chr12	8.24211	0.864591	2.26e-12	8.05e-12	240474	Negative	protein_coding	240299	Distal target gene eQTMs
ENSG00000051382	cg15242490	PIK3CB	chr3	60.4598	8.88395	5.22e-06	1.03e-05	-58530	Negative	protein_coding	240769	Distal target gene eQTMs
ENSG00000137221	cg18878034	TJAP1	chr6	-13.5351	2.31356	0.00010274	0.00017771	248110	Positive	protein_coding	248110	Distal target gene eQTMs
ENSG00000163798	cg04617441	SLC4A1AP	chr2	4.62714	0.643103	3.62e-07	7.97e-07	253743	Positive	protein_coding	253743	Distal target gene eQTMs
ENSG00000169371	cg16149030	SNUPN	chr15	-1.35216	0.109369	3.48e-18	2.2e-17	-229070	Negative	protein_coding	257456	Distal target gene eQTMs
ENSG00000173890	cg10350352	GPR160	chr3	26.1365	5.33366	0.00190667	0.00288504	268548	Positive	protein_coding	268482	Distal target gene eQTMs
ENSG00000100084	cg19700484	HIRA	chr22	7.82492	0.548342	1.09e-23	1.23e-22	-159475	Positive	protein_coding	276227	Distal target gene eQTMs
ENSG00000164128	cg16148948	NPY1R	chr4	-1.55646	0.415918	0.0349076	0.044932	-275243	Negative	protein_coding	296113	Distal target gene eQTMs
ENSG00000144827	cg01745657	ABHD10	chr3	-7.48768	0.850452	4.37e-11	1.38e-10	304688	Positive	protein_coding	304688	Distal target gene eQTMs
ENSG00000027001	cg03960313	MIPEP	chr13	2.8193	0.422375	5.43e-07	1.17e-06	-151971	Positive	protein_coding	311201	Distal target gene eQTMs
ENSG00000105364	cg10718940	MRPL4	chr19	-8.94404	0.45406	3.3e-35	1.49e-33	315543	Negative	protein_coding	315543	Distal target gene eQTMs
ENSG00000187715	cg15600124	KBTBD12	chr3	0.933817	0.132928	7.89e-07	1.68e-06	319718	Positive	protein_coding	319718	Distal target gene eQTMs
ENSG00000078070	cg06348081	MCCC1	chr3	5.12756	0.33665	1.32e-25	1.85e-24	-221694	Positive	protein_coding	322551	Distal target gene eQTMs
ENSG00000135778	cg00278134	NTPCR	chr1	-3.06191	0.347597	8.56e-11	2.63e-10	325341	Negative	protein_coding	325341	Distal target gene eQTMs
ENSG00000169016	cg27471536	E2F6	chr2	-2.69989	0.281961	2.67e-11	8.59e-11	-311259	Negative	protein_coding	333061	Distal target gene eQTMs
ENSG00000139973	cg18301703	SYT16	chr14	-1.21027	0.145138	1e-09	2.8e-09	349965	Negative	protein_coding	349965	Distal target gene eQTMs
ENSG00000117650	cg26187123	NEK2	chr1	-0.385833	0.0878961	0.0105823	0.0146042	-335018	Negative	protein_coding	351991	Distal target gene eQTMs
ENSG00000163344	cg09413064	PMVK	chr1	-9.73802	1.15972	4.87e-09	1.28e-08	-365794	Negative	protein_coding	378045	Distal target gene eQTMs
ENSG00000169519	cg07159484	METTL15	chr11	-4.28432	0.354021	4.91e-19	3.37e-18	407272	Positive	protein_coding	407272	Distal target gene eQTMs
ENSG00000198945	cg06871853	L3MBTL3	chr6	-1.47621	0.235761	0.00010981	0.00018933	414138	Positive	protein_coding	414138	Distal target gene eQTMs
ENSG00000196482	cg25232669	ESRRG	chr1	-20.4547	3.68921	7.23e-05	0.00012716	217607	Negative	protein_coding	416902	Distal target gene eQTMs
ENSG00000137871	cg21115151	ZNF280D	chr15	-14.4551	1.10578	6.27e-19	4.25e-18	-133398	Positive	protein_coding	421788	Distal target gene eQTMs
ENSG00000215018	cg08757143	COL28A1	chr7	-4.61534	0.283425	2e-26	3.06e-25	-252604	Negative	protein_coding	432254	Distal target gene eQTMs
ENSG00000105401	cg05508761	CDC37	chr19	-46.3981	2.95171	5.57e-25	7.25e-24	-454389	Positive	protein_coding	483377	Distal target gene eQTMs
ENSG00000163660	cg06068627	CCNL1	chr3	-86.8408	6.05048	7.32e-22	6.74e-21	-470716	Positive	protein_coding	484968	Distal target gene eQTMs
ENSG00000048991	cg09641469	R3HDM1	chr2	4.2067	0.462289	1.54e-12	5.58e-12	508189	Negative	protein_coding	508189	Distal target gene eQTMs
ENSG00000198597	cg20643362	ZNF536	chr19	-19.1246	1.1317	1.57e-26	2.44e-25	512828	Negative	protein_coding	512828	Distal target gene eQTMs
ENSG00000156475	cg25667141	PPP2R2B	chr5	70.2009	7.56191	1.23e-12	4.51e-12	-19387	Negative	protein_coding	523025	Distal target gene eQTMs
ENSG00000110092	cg26456404	CCND1	chr11	-13.7817	1.52179	2e-05	3.71e-05	525121	Negative	protein_coding	525121	Distal target gene eQTMs
ENSG00000197147	cg01423147	LRRC8B	chr1	17.3541	3.10811	7.95e-05	0.00013921	532174	Positive	protein_coding	532174	Distal target gene eQTMs
ENSG00000152990	cg07204550	ADGRA3	chr4	6.27842	0.947543	7.71e-07	1.64e-06	-396539	Positive	protein_coding	567522	Distal target gene eQTMs
ENSG00000085415	cg16868190	SEH1L	chr18	-2.42141	0.495189	0.0274308	0.0358516	569755	Negative	protein_coding	569755	Distal target gene eQTMs
ENSG00000111224	cg10518231	PARP11	chr12	-1.69579	0.253245	1.1e-05	2.1e-05	-490480	Negative	protein_coding	572881	Distal target gene eQTMs
ENSG00000069667	cg16384496	RORA	chr15	-237.954	28.5095	2.41e-09	6.51e-09	103856	Negative	protein_coding	637179	Distal target gene eQTMs
ENSG00000101247	cg01497961	NDUFAF5	chr20	-4.39124	0.393143	5.83e-18	3.6e-17	665286	Negative	protein_coding	665229	Distal target gene eQTMs
ENSG00000150275	cg06764972	PCDH15	chr10	-49.6962	4.38997	1.54e-17	9.11e-17	1102883	Negative	protein_coding	722288	Distal target gene eQTMs
ENSG00000108175	cg00600786	ZMIZ1	chr10	-70.6005	4.73504	8.86e-22	8.1e-21	765662	Negative	protein_coding	765731	Distal target gene eQTMs
ENSG00000118514	cg21064939	ALDH8A1	chr6	1.39733	0.204751	6.1e-07	1.31e-06	-742471	Positive	protein_coding	775200	Distal target gene eQTMs
ENSG00000172456	cg21488113	FGGY	chr1	-2.19437	0.16599	3.14e-20	2.44e-19	780592	Negative	protein_coding	780592	Distal target gene eQTMs
ENSG00000182771	cg18622896	GRID1	chr10	3.00013	0.261299	3.89e-16	2e-15	-51359	Positive	protein_coding	818300	Distal target gene eQTMs
ENSG00000173638	cg13481379	SLC19A1	chr21	4.58771	0.248111	3.72e-31	9.56e-30	152437	Negative	protein_coding	-2315	Promoter non-target gene eQTMs
ENSG00000142156	cg13481379	COL6A1	chr21	22.7425	1.2273	2.43e-28	4.59e-27	335728	Positive	protein_coding	-2315	Promoter non-target gene eQTMs
ENSG00000182871	cg13481379	COL18A1	chr21	75.4317	4.45739	1.51e-25	2.1e-24	-240844	Positive	protein_coding	-2315	Promoter non-target gene eQTMs
ENSG00000197381	cg13481379	ADARB1	chr21	25.1047	2.23565	1.18e-14	5.26e-14	-572156	Positive	protein_coding	-2315	Promoter non-target gene eQTMs
ENSG00000160298	cg13481379	C21orf58	chr21	1.35999	0.129756	3.34e-14	1.42e-13	-654172	Positive	protein_coding	-2315	Promoter non-target gene eQTMs
ENSG00000235374	cg13481379	SSR4P1	chr21	0.671559	0.0628023	3.11e-13	1.21e-12	575057	Positive	transcribed_processed_pseudogene	-2315	Promoter non-target gene eQTMs
ENSG00000229183	cg01595554	PGA4	chr11	0.17267	0.0321732	0.0113212	0.0155615	-729729	Positive	protein_coding	-2124	Promoter non-target gene eQTMs
ENSG00000113810	cg02470874	SMC4	chr3	20.6263	2.72448	6.68e-08	1.58e-07	-358274	Positive	protein_coding	-1946	Promoter non-target gene eQTMs
ENSG00000259706	cg15460872	HSP90B2P	chr15	-0.736	0.127112	7.7e-05	0.00013508	606932	Negative	processed_pseudogene	-1729	Promoter non-target gene eQTMs
ENSG00000122971	cg03198410	ACADS	chr12	1.34321	0.0929374	5.46e-20	4.15e-19	734257	Positive	protein_coding	-1648	Promoter non-target gene eQTMs
ENSG00000182175	cg09884223	RGMA	chr15	2.38808	0.221325	1.13e-13	4.55e-13	-151042	Negative	protein_coding	-1524	Promoter non-target gene eQTMs
ENSG00000177082	cg17823892	WDR73	chr15	14.0845	1.58174	2.13e-11	6.93e-11	342659	Positive	protein_coding	-1500	Promoter non-target gene eQTMs
ENSG00000119688	cg23929628	ABCD4	chr14	-17.8572	2.49019	7.46e-07	1.59e-06	-724868	Negative	protein_coding	-1454	Promoter non-target gene eQTMs
ENSG00000145198	cg13607248	VWA5B2	chr3	-2.32969	0.196646	1.44e-13	5.75e-13	73661	Positive	protein_coding	-1380	Promoter non-target gene eQTMs
ENSG00000175182	cg13607248	FAM131A	chr3	-3.38207	0.393815	5.88e-10	1.67e-09	179158	Positive	protein_coding	-1380	Promoter non-target gene eQTMs
ENSG00000272701	cg05222316	MESTIT1	chr7	0.302929	0.033437	1.65e-10	4.93e-10	625216	Positive	antisense	-1162	Promoter non-target gene eQTMs
ENSG00000133597	cg09658576	ADCK2	chr7	4.87331	0.714234	6.86e-07	1.47e-06	894787	Positive	protein_coding	-1107	Promoter non-target gene eQTMs
ENSG00000280162	cg14474669	RP11-314N13.9	chr20	-0.146801	0.0295232	0.0116224	0.0159444	-781989	Negative	TEC	-1088	Promoter non-target gene eQTMs
ENSG00000101695	cg18968597	RNF125	chr18	0.465724	0.0707214	1.46e-05	2.75e-05	-452733	Negative	protein_coding	-1074	Promoter non-target gene eQTMs
ENSG00000100532	cg24753200	CGRRF1	chr14	-7.29561	0.579937	4.77e-19	3.28e-18	-58086	Negative	protein_coding	-801	Promoter non-target gene eQTMs
ENSG00000196981	cg11122781	WDR5B	chr3	-5.32159	0.377503	6.25e-22	5.8e-21	382283	Positive	protein_coding	-791	Promoter non-target gene eQTMs
ENSG00000137936	cg15495124	BCAR3	chr1	-1.34618	0.163301	4.14e-09	1.1e-08	-599451	Negative	protein_coding	-768	Promoter non-target gene eQTMs
ENSG00000130338	cg15599146	TULP4	chr6	14.7192	1.36689	3.78e-12	1.32e-11	850340	Negative	protein_coding	-763	Promoter non-target gene eQTMs
ENSG00000156140	cg19739871	ADAMTS3	chr4	-10.642	0.964571	3.18e-15	1.5e-14	978588	Positive	protein_coding	-759	Promoter non-target gene eQTMs
ENSG00000111229	cg01195610	ARPC3	chr12	-6.65141	0.550093	3.4e-16	1.76e-15	-860895	Negative	protein_coding	-673	Promoter non-target gene eQTMs
ENSG00000275055	cg21211075	CTC-471J1.11	chr19	-1.32604	0.215761	1.92e-05	3.57e-05	477071	Negative	antisense	-638	Promoter non-target gene eQTMs
ENSG00000161558	cg08953194	TMEM143	chr19	-2.44145	0.199328	1.44e-15	7.02e-15	-724208	Negative	protein_coding	-624	Promoter non-target gene eQTMs
ENSG00000105402	cg08953194	NAPA	chr19	-18.6552	2.96306	1.23e-05	2.34e-05	120511	Positive	protein_coding	-624	Promoter non-target gene eQTMs
ENSG00000122033	cg25697556	MTIF3	chr13	-6.05182	0.568726	1.99e-14	8.65e-14	-877349	Negative	protein_coding	-591	Promoter non-target gene eQTMs
ENSG00000189241	cg04414860	TSPYL1	chr6	30.8981	2.03638	6.2e-26	9.01e-25	-13029	Positive	protein_coding	-558	Promoter non-target gene eQTMs
ENSG00000169087	cg18861827	HSPBAP1	chr3	-2.56084	0.366743	8.93e-07	1.89e-06	-989678	Positive	protein_coding	-554	Promoter non-target gene eQTMs
ENSG00000160124	cg18861827	CCDC58	chr3	-2.10217	0.31522	2.55e-06	5.17e-06	-609270	Negative	protein_coding	-554	Promoter non-target gene eQTMs
ENSG00000127481	cg08244959	UBR4	chr1	42.254	5.22123	8.68e-09	2.23e-08	-966230	Positive	protein_coding	-534	Promoter non-target gene eQTMs
ENSG00000272843	cg12099727	RP11-313P13.5	chr7	0.307874	0.0534364	4.32e-05	7.75e-05	759138	Positive	antisense	-531	Promoter non-target gene eQTMs
ENSG00000196850	cg21502840	PPTC7	chr12	22.056	2.6013	5.04e-10	1.44e-09	-959476	Positive	protein_coding	-514	Promoter non-target gene eQTMs
ENSG00000188730	cg19392396	VWC2	chr7	10.5481	1.80039	0.0002685	0.00044476	-1020319	Negative	protein_coding	-495	Promoter non-target gene eQTMs
ENSG00000187068	cg01686767	C3orf70	chr3	7.07425	0.822612	4.25e-10	1.23e-09	-920981	Positive	protein_coding	-469	Promoter non-target gene eQTMs
ENSG00000169836	cg11436899	TACR3	chr4	8.19915	1.07174	3.04e-09	8.15e-09	-716679	Positive	protein_coding	-456	Promoter non-target gene eQTMs
ENSG00000167257	cg13714403	RNF214	chr11	-4.90206	0.401559	8.39e-16	4.18e-15	133732	Positive	protein_coding	-456	Promoter non-target gene eQTMs
ENSG00000060491	cg22394521	OGFR	chr20	-24.3162	1.30018	6.31e-30	1.4e-28	-133567	Negative	protein_coding	-450	Promoter non-target gene eQTMs
ENSG00000101210	cg22394521	EEF1A2	chr20	-116.769	6.56926	1.48e-27	2.57e-26	-549612	Positive	protein_coding	-450	Promoter non-target gene eQTMs
ENSG00000130702	cg22394521	LAMA5	chr20	-23.74	1.31519	2.43e-25	3.28e-24	630447	Positive	protein_coding	-450	Promoter non-target gene eQTMs
ENSG00000197457	cg22394521	STMN3	chr20	-57.5622	3.85786	2.82e-23	3.03e-22	-701303	Positive	protein_coding	-450	Promoter non-target gene eQTMs
ENSG00000125520	cg22394521	SLC2A4RG	chr20	-10.1433	0.647235	1.83e-19	1.31e-18	801374	Positive	protein_coding	-450	Promoter non-target gene eQTMs
ENSG00000101181	cg22394521	MTG2	chr20	-7.45001	0.606609	3.78e-18	2.38e-17	-755373	Negative	protein_coding	-450	Promoter non-target gene eQTMs
ENSG00000184402	cg22394521	SS18L1	chr20	7.47828	0.582846	4.33e-18	2.71e-17	-794633	Positive	protein_coding	-450	Promoter non-target gene eQTMs
ENSG00000258366	cg22394521	RTEL1	chr20	-5.69629	0.454335	7.32e-18	4.5e-17	719408	Negative	protein_coding	-450	Promoter non-target gene eQTMs
ENSG00000101180	cg22394521	HRH3	chr20	-2.07913	0.165511	3.2e-15	1.51e-14	723442	Negative	protein_coding	-450	Promoter non-target gene eQTMs
ENSG00000075043	cg22394521	KCNQ2	chr20	-12.6664	1.08041	1.26e-14	5.59e-14	-461808	Positive	protein_coding	-450	Promoter non-target gene eQTMs
ENSG00000203900	cg22394521	RP11-261N11.8	chr20	-1.26875	0.114081	8.82e-11	2.7e-10	421586	Negative	antisense	-450	Promoter non-target gene eQTMs
ENSG00000069869	cg10437377	NEDD4	chr15	-4.37489	0.437904	8.96e-13	3.32e-12	417479	Negative	protein_coding	-392	Promoter non-target gene eQTMs
ENSG00000166450	cg10437377	PRTG	chr15	-26.5367	2.75554	1.77e-12	6.37e-12	632857	Positive	protein_coding	-392	Promoter non-target gene eQTMs
ENSG00000181827	cg10437377	RFX7	chr15	-7.43153	0.998028	5.34e-08	1.27e-07	157121	Positive	protein_coding	-392	Promoter non-target gene eQTMs
ENSG00000154144	cg08941173	TBRG1	chr11	-6.19027	1.27771	0.00462298	0.0066844	-542239	Negative	protein_coding	-388	Promoter non-target gene eQTMs
ENSG00000165861	cg05188117	ZFYVE1	chr14	4.87048	0.776786	2.31e-05	4.26e-05	-74964	Positive	protein_coding	-371	Promoter non-target gene eQTMs
ENSG00000170275	cg00392760	CRTAP	chr3	18.7901	3.84277	0.00519305	0.00746445	-604728	Positive	protein_coding	-351	Promoter non-target gene eQTMs
ENSG00000181449	cg05997021	SOX2	chr3	14.2649	1.50197	6.3e-11	1.96e-10	721806	Positive	protein_coding	-349	Promoter non-target gene eQTMs
ENSG00000174516	cg16838301	PELI3	chr11	-8.53	0.596931	2.06e-22	2.02e-21	-150639	Negative	protein_coding	-340	Promoter non-target gene eQTMs
ENSG00000269091	cg02607026	CTD-2126E3.3	chr19	0.431673	0.0268536	7.29e-24	8.37e-23	-275893	Positive	antisense	-335	Promoter non-target gene eQTMs
ENSG00000196914	cg12081932	ARHGEF12	chr11	-47.8284	7.56121	1.21e-05	2.3e-05	-175660	Positive	protein_coding	-314	Promoter non-target gene eQTMs
ENSG00000127948	cg06186973	POR	chr7	-28.59	1.62356	1.69e-30	4.06e-29	-460135	Positive	protein_coding	-304	Promoter non-target gene eQTMs
ENSG00000091073	cg06186973	DTX2	chr7	-8.12595	0.610105	3.17e-21	2.72e-20	102341	Negative	protein_coding	-304	Promoter non-target gene eQTMs
ENSG00000146701	cg06186973	MDH2	chr7	-39.3936	3.21261	4.31e-17	2.43e-16	-311284	Positive	protein_coding	-304	Promoter non-target gene eQTMs
ENSG00000243566	cg11638980	UPK3B	chr7	-0.649862	0.0942583	3.97e-06	7.89e-06	308239	Positive	protein_coding	-289	Promoter non-target gene eQTMs
ENSG00000205485	cg11638980	AC004980.7	chr7	-0.867748	0.145443	7.77e-05	0.00013623	347171	Negative	transcribed_unprocessed_pseudogene	-289	Promoter non-target gene eQTMs
ENSG00000069702	cg09737265	TGFBR3	chr1	-3.941	0.866668	0.0160307	0.0215777	-275187	Positive	protein_coding	-287	Promoter non-target gene eQTMs
ENSG00000161956	cg12709244	SENP3	chr17	12.4226	1.07725	4.51e-16	2.3e-15	341956	Negative	protein_coding	-261	Promoter non-target gene eQTMs
ENSG00000006606	cg16256922	CCL26	chr7	-0.508963	0.0970738	0.00044132	0.00071617	589756	Negative	protein_coding	-258	Promoter non-target gene eQTMs
ENSG00000180370	cg22624966	PAK2	chr3	7.03317	1.51452	0.0116391	0.0159649	421390	Positive	protein_coding	-245	Promoter non-target gene eQTMs
ENSG00000111358	cg17451138	GTF2H3	chr12	8.49872	0.912311	4.74e-11	1.49e-10	-37594	Positive	protein_coding	-220	Promoter non-target gene eQTMs
ENSG00000261763	cg08853659	RP11-442N1.2	chr3	52.436	4.41676	1.65e-16	8.81e-16	256783	Positive	lincRNA	-218	Promoter non-target gene eQTMs
ENSG00000132915	cg06967753	PDE6A	chr5	1906.38	276.761	6.94e-07	1.49e-06	-716254	Positive	protein_coding	-216	Promoter non-target gene eQTMs
ENSG00000090061	cg24708831	CCNK	chr14	5.03636	0.600222	2.91e-07	6.46e-07	-123058	Negative	protein_coding	-201	Promoter non-target gene eQTMs
ENSG00000258725	cg10570014	PRC1-AS1	chr15	-0.594697	0.0716599	3.19e-08	7.76e-08	-133811	Negative	antisense	-201	Promoter non-target gene eQTMs
ENSG00000053438	cg23062712	NNAT	chr20	28.6853	2.96442	2.88e-08	7.04e-08	774927	Negative	protein_coding	-201	Promoter non-target gene eQTMs
ENSG00000118707	cg23062712	TGIF2	chr20	1.51299	0.276105	0.00072934	0.00115563	-172791	Positive	protein_coding	-201	Promoter non-target gene eQTMs
ENSG00000162521	cg04680037	RBBP4	chr1	71.147	9.34096	2.25e-07	5.06e-07	-313740	Positive	protein_coding	-197	Promoter non-target gene eQTMs
ENSG00000084652	cg04680037	TXLNA	chr1	-10.2811	1.9694	0.00306978	0.00453334	-785207	Positive	protein_coding	-197	Promoter non-target gene eQTMs
ENSG00000166173	cg13339844	LARP6	chr15	4.109	0.4358	1.4e-12	5.1e-12	-730767	Negative	protein_coding	-187	Promoter non-target gene eQTMs
ENSG00000137818	cg13339844	RPLP1	chr15	29.5309	4.47946	2.03e-06	4.15e-06	-645549	Negative	protein_coding	-187	Promoter non-target gene eQTMs
ENSG00000107854	cg27543739	TNKS2	chr10	26.5661	2.52794	2.72e-14	1.17e-13	-775831	Negative	protein_coding	-181	Promoter non-target gene eQTMs
ENSG00000138190	cg27543739	EXOC6	chr10	26.6442	2.8819	2.49e-11	8.04e-11	260456	Positive	protein_coding	-181	Promoter non-target gene eQTMs
ENSG00000226686	cg14683738	LINC01535	chr19	-3.27213	0.329323	8.98e-12	3.03e-11	41194	Negative	lincRNA	-179	Promoter non-target gene eQTMs
ENSG00000178928	cg22820935	TPRX1	chr19	-1.00947	0.213673	0.0353511	0.0454761	1009961	Negative	protein_coding	-175	Promoter non-target gene eQTMs
ENSG00000110851	cg13381718	PRDM4	chr12	-3.86547	0.630423	1.54e-05	2.9e-05	828701	Negative	protein_coding	-172	Promoter non-target gene eQTMs
ENSG00000136045	cg13381718	PWP1	chr12	-3.48012	0.581308	6.66e-05	0.00011751	-875773	Negative	protein_coding	-172	Promoter non-target gene eQTMs
ENSG00000169372	cg18580865	CRADD	chr12	2.23324	0.245975	6.76e-11	2.09e-10	747884	Positive	protein_coding	-160	Promoter non-target gene eQTMs
ENSG00000183340	cg14107975	JRKL	chr11	-8.05867	0.735253	2.34e-15	1.12e-14	46655	Positive	protein_coding	-154	Promoter non-target gene eQTMs
ENSG00000196455	cg18698690	PIK3R4	chr3	14.3778	1.66407	1.86e-10	5.54e-10	-785208	Positive	protein_coding	-150	Promoter non-target gene eQTMs
ENSG00000017260	cg24649475	ATP2C1	chr3	49.6686	4.17321	7.58e-18	4.65e-17	956873	Negative	protein_coding	-146	Promoter non-target gene eQTMs
ENSG00000089006	cg22897353	SNX5	chr20	27.0967	2.08794	2.22e-19	1.58e-18	625994	Negative	protein_coding	-138	Promoter non-target gene eQTMs
ENSG00000132664	cg22897353	POLR3F	chr20	20.139	1.81476	7.37e-16	3.69e-15	-100202	Negative	protein_coding	-138	Promoter non-target gene eQTMs
ENSG00000131669	cg17130292	NINJ1	chr9	-9.89231	0.877284	3.34e-14	1.42e-13	330348	Negative	protein_coding	-122	Promoter non-target gene eQTMs
ENSG00000124155	cg14921743	PIGT	chr20	15.409	0.881002	3.93e-29	8e-28	-605726	Positive	protein_coding	-120	Promoter non-target gene eQTMs
ENSG00000275894	cg14921743	RP3-453C12.14	chr20	-0.265924	0.0321674	8.69e-09	2.23e-08	676695	Negative	sense_intronic	-120	Promoter non-target gene eQTMs
ENSG00000180764	cg02423930	PIPSL	chr10	0.359484	0.0449243	1.38e-08	3.47e-08	-475756	Positive	transcribed_processed_pseudogene	-118	Promoter non-target gene eQTMs
ENSG00000176945	cg13335434	MUC20	chr3	11.3971	0.979885	2.79e-12	9.86e-12	177388	Positive	protein_coding	-110	Promoter non-target gene eQTMs
ENSG00000139436	cg09011608	GIT2	chr12	-7.73132	1.13607	2.24e-06	4.56e-06	-215474	Negative	protein_coding	-100	Promoter non-target gene eQTMs
ENSG00000137842	cg21934878	TMEM62	chr15	4.77018	0.729094	1.13e-06	2.37e-06	202382	Negative	protein_coding	-88	Promoter non-target gene eQTMs
ENSG00000168803	cg21934878	ADAL	chr15	7.64564	1.49291	0.00103625	0.00161585	409760	Positive	protein_coding	-88	Promoter non-target gene eQTMs
ENSG00000078747	cg21523528	ITCH	chr20	13.9255	2.01961	1.16e-06	2.43e-06	873081	Positive	protein_coding	-85	Promoter non-target gene eQTMs
ENSG00000154727	cg08866780	GABPA	chr21	-4.90031	0.771649	1.22e-05	2.32e-05	-436635	Negative	protein_coding	-77	Promoter non-target gene eQTMs
ENSG00000131100	cg14561318	ATP6V1E1	chr22	-20.0008	1.39656	6.75e-24	7.81e-23	432499	Positive	protein_coding	-76	Promoter non-target gene eQTMs
ENSG00000183628	cg14561318	DGCR6	chr22	4.56872	0.337788	1.51e-20	1.21e-19	881393	Positive	protein_coding	-76	Promoter non-target gene eQTMs
ENSG00000215193	cg14561318	PEX26	chr22	5.96119	0.524801	3e-15	1.42e-14	53285	Positive	protein_coding	-76	Promoter non-target gene eQTMs
ENSG00000104142	cg20918218	VPS18	chr15	5.4163	0.346529	4.71e-24	5.58e-23	676948	Positive	protein_coding	-74	Promoter non-target gene eQTMs
ENSG00000142784	cg03115835	WDTC1	chr1	-147.135	22.1777	7.4e-06	1.44e-05	802277	Negative	protein_coding	-73	Promoter non-target gene eQTMs
ENSG00000107140	cg16947476	TESK1	chr9	-21.2155	1.53591	4.98e-21	4.18e-20	115068	Negative	protein_coding	-67	Promoter non-target gene eQTMs
ENSG00000187186	cg16947476	RP11-195F19.5	chr9	-1.0452	0.178357	6.62e-05	0.00011683	826031	Negative	protein_coding	-67	Promoter non-target gene eQTMs
ENSG00000137497	cg25433490	NUMA1	chr11	-80.95	5.74944	5.45e-22	5.11e-21	790799	Positive	protein_coding	-64	Promoter non-target gene eQTMs
ENSG00000108654	cg08355344	DDX5	chr17	162.627	9.82335	9.42e-30	2.05e-28	-236253	Negative	protein_coding	-62	Promoter non-target gene eQTMs
ENSG00000159640	cg08355344	ACE	chr17	-1.978	0.145798	4.74e-19	3.26e-18	-786302	Negative	protein_coding	-62	Promoter non-target gene eQTMs
ENSG00000136490	cg08355344	LIMD2	chr17	-0.73992	0.0765535	2.86e-11	9.17e-11	567475	Negative	protein_coding	-62	Promoter non-target gene eQTMs
ENSG00000108588	cg08355344	CCDC47	chr17	12.9227	1.53984	6.16e-09	1.6e-08	518108	Positive	protein_coding	-62	Promoter non-target gene eQTMs
ENSG00000139714	cg14517859	MORN3	chr12	-1.33604	0.181272	8.06e-05	0.00014106	64071	Negative	protein_coding	-61	Promoter non-target gene eQTMs
ENSG00000273142	cg23755113	RP11-458F8.4	chr7	-2.67557	0.445765	3.79e-05	6.85e-05	697607	Negative	lincRNA	-51	Promoter non-target gene eQTMs
ENSG00000184227	cg21035356	ACOT1	chr14	-0.432878	0.0572509	1.78e-07	4.04e-07	642978	Negative	protein_coding	-49	Promoter non-target gene eQTMs
ENSG00000136169	cg12774482	SETDB2	chr13	-6.90023	0.661812	1.16e-13	4.67e-13	-637844	Negative	protein_coding	-47	Promoter non-target gene eQTMs
ENSG00000176641	cg12132949	RNF152	chr18	-22.6287	2.05259	4.91e-16	2.5e-15	907430	Negative	protein_coding	-47	Promoter non-target gene eQTMs
ENSG00000197380	cg24904303	DACT3	chr19	2.85621	0.284767	1.2e-11	4e-11	466243	Positive	protein_coding	-42	Promoter non-target gene eQTMs
ENSG00000280649	cg14002175	AC245100.1	chr1	0.396396	0.0514494	1.1e-08	2.79e-08	917363	Positive	protein_coding	-39	Promoter non-target gene eQTMs
ENSG00000240342	cg01070209	RPS2P5	chr12	9.23454	1.08034	3.95e-10	1.14e-09	-735442	Positive	processed_pseudogene	-31	Promoter non-target gene eQTMs
ENSG00000220785	cg10307600	MTMR9LP	chr1	-0.905252	0.115978	1.03e-07	2.39e-07	733055	Negative	transcribed_unprocessed_pseudogene	-28	Promoter non-target gene eQTMs
ENSG00000272989	cg20860638	RP13-616I3.1	chr3	0.87727	0.165194	0.0010308	0.00160805	-475418	Positive	lincRNA	-28	Promoter non-target gene eQTMs
ENSG00000278921	cg18741679	EPB41L4A-AS2	chr5	-0.347756	0.0430106	2.4e-09	6.49e-09	239	Negative	lincRNA	-28	Promoter non-target gene eQTMs
ENSG00000154114	cg11130923	TBCEL	chr11	6.04713	0.760474	8.77e-09	2.25e-08	787405	Negative	protein_coding	-27	Promoter non-target gene eQTMs
ENSG00000245248	cg11130923	USP2-AS1	chr11	-0.814476	0.0845488	2.31e-07	5.18e-07	-872308	Negative	antisense	-27	Promoter non-target gene eQTMs
ENSG00000132646	cg04527057	PCNA	chr20	21.4417	2.15197	1.08e-12	3.98e-12	11858	Positive	protein_coding	-25	Promoter non-target gene eQTMs
ENSG00000125885	cg07327202	MCM8	chr20	6.71686	0.634345	2.51e-15	1.19e-14	823847	Positive	protein_coding	-19	Promoter non-target gene eQTMs
ENSG00000125772	cg07327202	GPCPD1	chr20	12.9491	2.24152	7.13e-05	0.00012547	-417599	Positive	protein_coding	-19	Promoter non-target gene eQTMs
ENSG00000126464	cg23169266	PRR12	chr19	-30.6516	1.11657	4.06e-49	1.59e-46	780138	Positive	protein_coding	-15	Promoter non-target gene eQTMs
ENSG00000196961	cg23169266	AP2A1	chr19	-40.9294	1.58772	5.24e-46	1.18e-43	955924	Positive	protein_coding	-15	Promoter non-target gene eQTMs
ENSG00000177380	cg23169266	PPFIA3	chr19	-21.9008	0.990523	1.69e-36	9.06e-35	308500	Negative	protein_coding	-15	Promoter non-target gene eQTMs
ENSG00000183207	cg23169266	RUVBL2	chr19	-13.132	0.763042	3.43e-28	6.31e-27	182518	Positive	protein_coding	-15	Promoter non-target gene eQTMs
ENSG00000126457	cg23169266	PRMT1	chr19	-39.5676	2.44914	6.93e-27	1.12e-25	864742	Positive	protein_coding	-15	Promoter non-target gene eQTMs
ENSG00000142546	cg23169266	NOSIP	chr19	-5.86564	0.427502	1.77e-20	1.41e-19	-744667	Negative	protein_coding	-15	Promoter non-target gene eQTMs
ENSG00000089063	cg04562739	TMEM230	chr20	18.4018	1.61978	1.89e-17	1.11e-16	58568	Positive	protein_coding	-14	Promoter non-target gene eQTMs
ENSG00000166428	cg01466328	PLD4	chr14	2.133	0.219369	1.04e-07	2.41e-07	-473879	Positive	protein_coding	-13	Promoter non-target gene eQTMs
ENSG00000125398	cg17100696	SOX9	chr17	35.035	2.27926	4.62e-25	6.06e-24	-971703	Negative	protein_coding	-11	Promoter non-target gene eQTMs
ENSG00000138279	cg27046659	ANXA7	chr10	-6.95846	0.656195	5.59e-14	2.33e-13	499493	Positive	protein_coding	-3	Promoter non-target gene eQTMs
ENSG00000271327	cg16431687	RP11-1109F11.3	chr12	-0.58046	0.0635086	5.94e-12	2.03e-11	-158213	Negative	lincRNA	4	Promoter non-target gene eQTMs
ENSG00000265479	cg05490269	DTX2P1-UPK3BP1-PMS2P11	chr7	-7.38938	0.505108	8.11e-24	9.27e-23	757943	Negative	processed_transcript	8	Promoter non-target gene eQTMs
ENSG00000169313	cg23876599	P2RY12	chr3	1.1867	0.262895	0.0360818	0.046345	-734164	Positive	protein_coding	12	Promoter non-target gene eQTMs
ENSG00000120324	cg27339505	PCDHB10	chr5	-2.07015	0.184416	1.32e-14	5.85e-14	-426689	Negative	protein_coding	13	Promoter non-target gene eQTMs
ENSG00000277072	cg23640897	STAG3L2	chr7	-2.13411	0.502803	0.0213471	0.0282575	-389981	Negative	transcribed_unprocessed_pseudogene	17	Promoter non-target gene eQTMs
ENSG00000197724	cg25636224	PHF2	chr9	18.2709	3.17581	9.88e-05	0.00017124	391693	Positive	protein_coding	25	Promoter non-target gene eQTMs
ENSG00000128590	cg25762580	DNAJB9	chr7	-30.1532	5.47714	0.00035731	0.00058504	229	Negative	protein_coding	28	Promoter non-target gene eQTMs
ENSG00000170633	cg08662340	RNF34	chr12	5.43936	0.632326	1.29e-10	3.9e-10	930234	Positive	protein_coding	43	Promoter non-target gene eQTMs
ENSG00000183273	cg08662340	CCDC60	chr12	0.693312	0.125879	0.0003654	0.00059778	-1135095	Positive	protein_coding	43	Promoter non-target gene eQTMs
ENSG00000198246	cg09796583	SLC29A3	chr10	1.03709	0.112068	5.94e-11	1.85e-10	-77631	Positive	protein_coding	44	Promoter non-target gene eQTMs
ENSG00000139428	cg09454237	MMAB	chr12	-2.86381	0.378364	1.82e-07	4.13e-07	-76358	Negative	protein_coding	45	Promoter non-target gene eQTMs
ENSG00000177674	cg17944110	AGTRAP	chr1	2.42528	0.370685	7.81e-06	1.51e-05	939484	Negative	protein_coding	50	Promoter non-target gene eQTMs
ENSG00000254477	cg06124782	AP000640.10	chr11	-0.424036	0.06476	8.42e-06	1.63e-05	2431	Negative	antisense	50	Promoter non-target gene eQTMs
ENSG00000166275	cg11453585	BORCS7	chr10	6.95446	0.839364	4.27e-09	1.13e-08	350292	Positive	protein_coding	56	Promoter non-target gene eQTMs
ENSG00000198728	cg11453585	LDB1	chr10	-12.6319	1.84243	2.45e-06	4.98e-06	396371	Negative	protein_coding	56	Promoter non-target gene eQTMs
ENSG00000268043	cg20924778	NBPF12	chr1	-9.62117	0.747446	6.03e-21	5.03e-20	-602609	Negative	protein_coding	59	Promoter non-target gene eQTMs
ENSG00000131791	cg20924778	PRKAB2	chr1	-12.0148	0.950591	4.2e-20	3.22e-19	386247	Negative	protein_coding	59	Promoter non-target gene eQTMs
ENSG00000188092	cg20924778	GPR89B	chr1	-2.87207	0.261015	2.41e-14	1.04e-13	387040	Positive	protein_coding	59	Promoter non-target gene eQTMs
ENSG00000273024	cg21027573	INTS4P2	chr7	0.56737	0.085607	2.95e-06	5.93e-06	-557304	Positive	transcribed_unprocessed_pseudogene	72	Promoter non-target gene eQTMs
ENSG00000105939	cg03789433	ZC3HAV1	chr7	7.36618	0.666577	5.12e-13	1.94e-12	296770	Positive	protein_coding	74	Promoter non-target gene eQTMs
ENSG00000121858	cg14466989	TNFSF10	chr3	4.48843	0.578914	4.23e-05	7.6e-05	205634	Negative	protein_coding	76	Promoter non-target gene eQTMs
ENSG00000159322	cg12524179	ADPGK	chr15	-5.44396	0.46283	2.2e-16	1.16e-15	932519	Negative	protein_coding	78	Promoter non-target gene eQTMs
ENSG00000196313	cg00628703	POM121	chr7	-49.6854	3.36843	3.67e-24	4.38e-23	-803579	Negative	protein_coding	81	Promoter non-target gene eQTMs
ENSG00000012171	cg19090210	SEMA3B	chr3	-10.1918	0.967879	3.12e-11	9.96e-11	112599	Positive	protein_coding	86	Promoter non-target gene eQTMs
ENSG00000213542	cg06907160	RP11-467H10.1	chr7	-0.993193	0.11708	6.01e-08	1.42e-07	-756469	Negative	processed_pseudogene	101	Promoter non-target gene eQTMs
ENSG00000086598	cg03434624	TMED2	chr12	13.1635	2.37664	0.00048245	0.00077919	688197	Positive	protein_coding	108	Promoter non-target gene eQTMs
ENSG00000136003	cg14949649	ISCU	chr12	-10.3707	0.905654	2.82e-17	1.62e-16	-914695	Negative	protein_coding	125	Promoter non-target gene eQTMs
ENSG00000277726	cg19955419	RP4-635E18.9	chr1	-1.88671	0.100403	4.07e-30	9.29e-29	801985	Negative	protein_coding	128	Promoter non-target gene eQTMs
ENSG00000063015	cg19154303	SEZ6	chr17	-76.1269	5.5659	1.72e-19	1.24e-18	975240	Negative	protein_coding	135	Promoter non-target gene eQTMs
ENSG00000108582	cg19154303	CPD	chr17	49.423	5.24286	1.54e-10	4.62e-10	448786	Positive	protein_coding	135	Promoter non-target gene eQTMs
ENSG00000250462	cg19154303	LRRC37BP1	chr17	39.6099	4.8726	3.39e-09	9.05e-09	699539	Positive	transcribed_unprocessed_pseudogene	135	Promoter non-target gene eQTMs
ENSG00000275185	cg19154303	RP13-753N3.3	chr17	0.431706	0.069143	1.04e-05	1.99e-05	968969	Positive	antisense	135	Promoter non-target gene eQTMs
ENSG00000142599	cg10009930	RERE	chr1	-48.0302	4.79034	3.39e-12	1.19e-11	1186947	Positive	protein_coding	138	Promoter non-target gene eQTMs
ENSG00000070269	cg24279288	TMEM260	chr14	-5.089	0.395426	2.98e-19	2.1e-18	-324691	Negative	protein_coding	138	Promoter non-target gene eQTMs
ENSG00000053770	cg24279288	AP5M1	chr14	-17.4413	1.56375	1.58e-16	8.44e-16	455879	Positive	protein_coding	138	Promoter non-target gene eQTMs
ENSG00000165588	cg24279288	OTX2	chr14	-77.5888	7.17986	6.21e-16	3.13e-15	13140	Negative	protein_coding	138	Promoter non-target gene eQTMs
ENSG00000070367	cg24279288	EXOC5	chr14	-19.7333	2.19055	3.68e-11	1.17e-10	-387462	Negative	protein_coding	138	Promoter non-target gene eQTMs
ENSG00000138111	cg17540006	MFSD13A	chr10	-2.76423	0.246734	3.81e-16	1.96e-15	-456757	Negative	protein_coding	141	Promoter non-target gene eQTMs
ENSG00000251602	cg11747209	RP11-521B24.3	chr14	-0.61756	0.0509889	2.25e-17	1.31e-16	-18448	Negative	antisense	143	Promoter non-target gene eQTMs
ENSG00000231584	cg07224438	FAHD2CP	chr2	-2.53497	0.234004	4.15e-13	1.59e-12	-750197	Negative	transcribed_unprocessed_pseudogene	154	Promoter non-target gene eQTMs
ENSG00000084090	cg07224438	STARD7	chr2	25.8925	3.38193	1.62e-08	4.05e-08	575889	Negative	protein_coding	154	Promoter non-target gene eQTMs
ENSG00000178741	cg21245483	COX5A	chr15	-10.9265	0.911605	5.8e-17	3.23e-16	-321451	Negative	protein_coding	160	Promoter non-target gene eQTMs
ENSG00000270629	cg05349042	NBPF14	chr1	-9.15304	1.07311	1.16e-11	3.88e-11	-990135	Positive	protein_coding	162	Promoter non-target gene eQTMs
ENSG00000135702	cg26627568	CHST5	chr16	-0.985892	0.106168	7.73e-11	2.38e-10	-529675	Negative	protein_coding	170	Promoter non-target gene eQTMs
ENSG00000153774	cg26627568	CFDP1	chr16	4.51946	0.908231	0.00160411	0.0024483	-294838	Negative	protein_coding	170	Promoter non-target gene eQTMs
ENSG00000010244	cg18459257	ZNF207	chr17	-46.1134	3.07271	1.03e-24	1.3e-23	84118	Negative	protein_coding	177	Promoter non-target gene eQTMs
ENSG00000131778	cg11497794	CHD1L	chr1	-8.17769	0.545874	1.65e-25	2.28e-24	-298573	Positive	protein_coding	185	Promoter non-target gene eQTMs
ENSG00000263956	cg11497794	NBPF11	chr1	-4.34933	0.459745	6.6e-13	2.48e-12	-560819	Positive	protein_coding	185	Promoter non-target gene eQTMs
ENSG00000153560	cg23915065	UBP1	chr3	22.3656	1.40714	7.14e-28	1.27e-26	329826	Positive	protein_coding	194	Promoter non-target gene eQTMs
ENSG00000153558	cg23915065	FBXL2	chr3	8.54791	0.520458	2.09e-26	3.19e-25	-441137	Positive	protein_coding	194	Promoter non-target gene eQTMs
ENSG00000119231	cg10624175	SENP5	chr3	11.4199	1.17692	8.61e-12	2.91e-11	-869118	Positive	protein_coding	205	Promoter non-target gene eQTMs
ENSG00000279427	cg05087309	RP11-132F7.2	chr16	0.709254	0.0573905	2.84e-19	2e-18	618054	Positive	TEC	207	Promoter non-target gene eQTMs
ENSG00000282416	cg19548313	LLNLF-173C4.2	chr19	-3.00392	0.2712	6.3e-11	1.96e-10	868403	Negative	processed_pseudogene	210	Promoter non-target gene eQTMs
ENSG00000170248	cg17504655	PDCD6IP	chr3	21.2708	2.48889	2.41e-10	7.1e-10	80428	Positive	protein_coding	213	Promoter non-target gene eQTMs
ENSG00000176095	cg10992925	IP6K1	chr3	17.5189	2.22975	1.68e-07	3.83e-07	430533	Positive	protein_coding	218	Promoter non-target gene eQTMs
ENSG00000189266	cg15729771	PNRC2	chr1	40.4048	6.13007	7.59e-06	1.47e-05	-788286	Positive	protein_coding	232	Promoter non-target gene eQTMs
ENSG00000089639	cg25713821	GMIP	chr19	-1.27487	0.194025	2.46e-05	4.52e-05	-595688	Negative	protein_coding	235	Promoter non-target gene eQTMs
ENSG00000095564	cg22812892	BTAF1	chr10	159.507	13.7882	4.96e-16	2.52e-15	-650059	Negative	protein_coding	247	Promoter non-target gene eQTMs
ENSG00000197813	cg03263025	CTC-301O7.4	chr19	-0.57193	0.0718716	4.38e-08	1.05e-07	435196	Negative	lincRNA	247	Promoter non-target gene eQTMs
ENSG00000161681	cg18379413	SHANK1	chr19	22.4535	0.926142	2.89e-43	3.85e-41	909213	Negative	protein_coding	258	Promoter non-target gene eQTMs
ENSG00000197608	cg18379413	ZNF841	chr19	-10.0089	0.713555	1.74e-19	1.25e-18	-493426	Negative	protein_coding	258	Promoter non-target gene eQTMs
ENSG00000103460	cg02851147	TOX3	chr16	17.3577	1.56768	1.96e-15	9.41e-15	618332	Positive	protein_coding	284	Promoter non-target gene eQTMs
ENSG00000167524	cg22686523	SGK494	chr17	-16.3873	2.1999	1.19e-07	2.74e-07	5944	Negative	protein_coding	289	Promoter non-target gene eQTMs
ENSG00000166946	cg04792065	CCNDBP1	chr15	12.4032	0.8241	1e-24	1.26e-23	264615	Positive	protein_coding	306	Promoter non-target gene eQTMs
ENSG00000159459	cg04792065	UBR1	chr15	21.0731	2.02014	6.5e-14	2.69e-13	-22394	Positive	protein_coding	306	Promoter non-target gene eQTMs
ENSG00000021776	cg20918730	AQR	chr15	26.0912	2.25179	1.33e-17	7.95e-17	-514030	Positive	protein_coding	308	Promoter non-target gene eQTMs
ENSG00000155629	cg19770550	PIK3AP1	chr10	-4.18481	0.586355	3.98e-07	8.73e-07	905227	Negative	protein_coding	326	Promoter non-target gene eQTMs
ENSG00000120057	cg19770550	SFRP5	chr10	1.417	0.282964	0.0386852	0.0495043	-268209	Positive	protein_coding	326	Promoter non-target gene eQTMs
ENSG00000169018	cg01618114	FEM1B	chr15	25.1837	4.18242	2.9e-05	5.3e-05	-300895	Positive	protein_coding	329	Promoter non-target gene eQTMs
ENSG00000120696	cg06146910	KBTBD7	chr13	12.6335	3.11799	0.0248622	0.0326621	-57241	Positive	protein_coding	347	Promoter non-target gene eQTMs
ENSG00000138459	cg01745657	SLC35A5	chr3	-11.318	1.06917	7.3e-15	3.32e-14	887387	Positive	protein_coding	354	Promoter non-target gene eQTMs
ENSG00000144848	cg01745657	ATG3	chr3	-2.75945	0.475956	0.00011721	0.00020138	-858187	Negative	protein_coding	354	Promoter non-target gene eQTMs
ENSG00000172578	cg01650457	KLHL6	chr3	-0.671477	0.121533	0.00092968	0.00145573	-59135	Negative	protein_coding	362	Promoter non-target gene eQTMs
ENSG00000247572	cg17933386	CKMT2-AS1	chr5	-2.91125	0.45551	3.36e-06	6.72e-06	550086	Negative	antisense	370	Promoter non-target gene eQTMs
ENSG00000188811	cg25822402	NHLRC3	chr13	-8.74426	0.805722	4.36e-16	2.23e-15	351566	Negative	protein_coding	389	Promoter non-target gene eQTMs
ENSG00000110906	cg05374798	KCTD10	chr12	-5.1314	0.681501	8.93e-08	2.08e-07	-887662	Negative	protein_coding	407	Promoter non-target gene eQTMs
ENSG00000172594	cg13426829	SMPDL3A	chr6	-0.905748	0.201605	0.00413691	0.00601375	-1014681	Negative	protein_coding	411	Promoter non-target gene eQTMs
ENSG00000197885	cg12306156	NKIRAS1	chr3	-12.4733	1.82137	1.96e-07	4.43e-07	603176	Negative	protein_coding	446	Promoter non-target gene eQTMs
ENSG00000174738	cg12306156	NR1D2	chr3	-32.4943	6.40284	0.00105402	0.00164165	-549550	Negative	protein_coding	446	Promoter non-target gene eQTMs
ENSG00000163531	cg01111494	NFASC	chr1	-80.3087	8.45707	1.92e-11	6.27e-11	-399065	Positive	protein_coding	460	Promoter non-target gene eQTMs
ENSG00000143033	cg19827167	MTF2	chr1	7.9216	0.750901	3.33e-14	1.42e-13	-767415	Positive	protein_coding	500	Promoter non-target gene eQTMs
ENSG00000162441	cg09174674	LZIC	chr1	12.1813	0.585202	3.68e-37	2.13e-35	-98129	Positive	protein_coding	542	Promoter non-target gene eQTMs
ENSG00000114867	cg18381208	EIF4G1	chr3	-39.9578	2.59969	1.3e-25	1.83e-24	297022	Negative	protein_coding	542	Promoter non-target gene eQTMs
ENSG00000146966	cg11032313	DENND2A	chr7	13.7711	1.00027	3.72e-20	2.87e-19	-741921	Positive	protein_coding	552	Promoter non-target gene eQTMs
ENSG00000157800	cg11032313	SLC37A3	chr7	-5.10484	0.616785	1.95e-09	5.32e-09	-517194	Positive	protein_coding	552	Promoter non-target gene eQTMs
ENSG00000114770	cg20696912	ABCC5	chr3	172.399	11.2885	2.15e-23	2.34e-22	-491711	Positive	protein_coding	555	Promoter non-target gene eQTMs
ENSG00000157782	cg20066120	CABP1	chr12	-15.5163	1.26713	1.3e-16	7e-16	523623	Negative	protein_coding	573	Promoter non-target gene eQTMs
ENSG00000155085	cg17624938	AK9	chr6	-6.46456	0.974405	0.00010278	0.00017776	-398621	Negative	protein_coding	584	Promoter non-target gene eQTMs
ENSG00000277007	cg05367960	RP11-392O17.2	chr1	-0.351863	0.0325137	5.13e-16	2.61e-15	-1001090	Negative	lincRNA	590	Promoter non-target gene eQTMs
ENSG00000110880	cg00461311	CORO1C	chr12	8.52369	1.61894	0.00535315	0.00767888	377385	Positive	protein_coding	595	Promoter non-target gene eQTMs
ENSG00000149089	cg09205801	APIP	chr11	-5.07384	0.617578	6.06e-09	1.58e-08	-495685	Negative	protein_coding	599	Promoter non-target gene eQTMs
ENSG00000072958	cg01860947	AP1M1	chr19	-14.4829	0.678685	2.95e-35	1.34e-33	865648	Positive	protein_coding	615	Promoter non-target gene eQTMs
ENSG00000167461	cg01860947	RAB8A	chr19	-5.91592	0.324837	2.22e-30	5.22e-29	779959	Negative	protein_coding	615	Promoter non-target gene eQTMs
ENSG00000006283	cg01446983	CACNA1G	chr17	-41.0848	2.75396	7.07e-23	7.29e-22	883101	Negative	protein_coding	620	Promoter non-target gene eQTMs
ENSG00000108821	cg01446983	COL1A1	chr17	-2.34854	0.243804	4.97e-08	1.19e-07	-505675	Positive	protein_coding	620	Promoter non-target gene eQTMs
ENSG00000167107	cg01446983	ACSF2	chr17	-1.6848	0.24515	3.51e-05	6.37e-05	748544	Positive	protein_coding	620	Promoter non-target gene eQTMs
ENSG00000274444	cg19416470	RP11-128A17.2	chr15	-0.133347	0.0280379	0.00269516	0.00400807	8919	Negative	lincRNA	631	Promoter non-target gene eQTMs
ENSG00000188033	cg03172991	ZNF490	chr19	-6.84101	0.257461	7.78e-44	1.15e-41	418814	Negative	protein_coding	694	Promoter non-target gene eQTMs
ENSG00000234719	cg16495772	RP11-166B2.1	chr16	-1.53806	0.233824	1.88e-06	3.86e-06	48599	Negative	protein_coding	765	Promoter non-target gene eQTMs
ENSG00000273576	cg12233386	RP11-390P24.1	chr17	0.871253	0.129339	4.66e-06	9.2e-06	-741512	Positive	lincRNA	765	Promoter non-target gene eQTMs
ENSG00000106682	cg24971998	EIF4H	chr7	-46.2137	7.0651	1.22e-05	2.32e-05	492002	Negative	protein_coding	782	Promoter non-target gene eQTMs
ENSG00000133794	cg23231515	ARNTL	chr11	-15.5322	1.33491	3.32e-18	2.11e-17	602858	Positive	protein_coding	797	Promoter non-target gene eQTMs
ENSG00000197601	cg23231515	FAR1	chr11	-37.9541	3.73744	2.84e-13	1.11e-12	994874	Negative	protein_coding	797	Promoter non-target gene eQTMs
ENSG00000148925	cg23231515	BTBD10	chr11	-5.37982	0.584662	8.2e-12	2.77e-11	-714207	Negative	protein_coding	797	Promoter non-target gene eQTMs
ENSG00000090520	cg04231166	DNAJB11	chr3	-6.41749	0.902978	6.27e-06	1.22e-05	630067	Negative	protein_coding	800	Promoter non-target gene eQTMs
ENSG00000163904	cg04231166	SENP2	chr3	-7.10339	1.38583	0.00078042	0.00123266	-354840	Negative	protein_coding	800	Promoter non-target gene eQTMs
ENSG00000158092	cg09250304	NCK1	chr3	8.80988	1.45251	1.85e-05	3.45e-05	110616	Positive	protein_coding	811	Promoter non-target gene eQTMs
ENSG00000196656	cg22876904	AC004057.1	chr4	2.67723	0.274043	1.83e-09	5e-09	547026	Positive	transcribed_processed_pseudogene	855	Promoter non-target gene eQTMs
ENSG00000138326	cg09405661	RPS24	chr10	37.6773	4.34485	2.88e-09	7.73e-09	396063	Positive	protein_coding	898	Promoter non-target gene eQTMs
ENSG00000185164	cg21608192	NOMO2	chr16	14.4837	2.7033	0.00020335	0.00034078	-947355	Positive	protein_coding	911	Promoter non-target gene eQTMs
ENSG00000197894	cg08535467	ADH5	chr4	-15.0863	1.55623	2.24e-13	8.82e-13	-413284	Negative	protein_coding	935	Promoter non-target gene eQTMs
ENSG00000017797	cg02901728	RALBP1	chr18	11.3806	1.72255	1.6e-06	3.31e-06	770285	Positive	protein_coding	937	Promoter non-target gene eQTMs
ENSG00000157303	cg00743998	SUSD3	chr9	2.98571	0.585889	0.0056916	0.00813251	-125267	Positive	protein_coding	961	Promoter non-target gene eQTMs
ENSG00000271643	cg21483906	RP11-10C24.3	chr3	3.67425	0.261528	2.68e-21	2.31e-20	-76266	Negative	lincRNA	978	Promoter non-target gene eQTMs
ENSG00000170142	cg15787595	UBE2E1	chr3	-19.8566	2.72129	9.66e-08	2.25e-07	-688377	Positive	protein_coding	1002	Promoter non-target gene eQTMs
ENSG00000168952	cg01929810	STXBP6	chr14	-3.37616	0.645536	0.00192476	0.0029099	-689727	Negative	protein_coding	1027	Promoter non-target gene eQTMs
ENSG00000270344	cg20293906	RP11-734K2.4	chr12	-3.03309	0.22588	2.77e-21	2.39e-20	-383	Negative	antisense	1047	Promoter non-target gene eQTMs
ENSG00000258302	cg20293906	RP11-981P6.1	chr12	-0.36297	0.0661172	0.00017778	0.00029983	36152	Negative	antisense	1047	Promoter non-target gene eQTMs
ENSG00000257594	cg00491607	GALNT4	chr12	-6.08852	0.672039	1.19e-11	3.97e-11	5560	Negative	protein_coding	1052	Promoter non-target gene eQTMs
ENSG00000269984	cg06010307	RP11-362K14.5	chr3	-0.712214	0.070769	1.84e-12	6.61e-12	43606	Negative	antisense	1124	Promoter non-target gene eQTMs
ENSG00000171757	cg06010307	LRRC34	chr3	-4.07141	0.426264	4.14e-11	1.31e-10	27370	Negative	protein_coding	1124	Promoter non-target gene eQTMs
ENSG00000272788	cg12171863	RP11-674N23.4	chr18	-0.347983	0.0386183	3.93e-11	1.24e-10	97120	Negative	sense_intronic	1125	Promoter non-target gene eQTMs
ENSG00000137809	cg09777506	ITGA11	chr15	1.90466	0.28673	7.42e-06	1.44e-05	523193	Positive	protein_coding	1172	Promoter non-target gene eQTMs
ENSG00000279026	cg25495195	RP3-414A15.12	chr14	1.45544	0.292853	0.00222285	0.00333731	687773	Positive	TEC	1195	Promoter non-target gene eQTMs
ENSG00000117906	cg14162034	RCN2	chr15	-26.4824	2.80618	2.12e-11	6.9e-11	-887946	Positive	protein_coding	1216	Promoter non-target gene eQTMs
ENSG00000166411	cg14162034	IDH3A	chr15	-13.7369	2.65314	0.00069019	0.00109547	311814	Positive	protein_coding	1216	Promoter non-target gene eQTMs
ENSG00000186073	cg17850518	C15orf41	chr15	-4.82581	0.55705	4.22e-10	1.22e-09	-520279	Negative	protein_coding	1394	Promoter non-target gene eQTMs
ENSG00000175279	cg12035827	APITD1	chr1	-0.867192	0.0960301	1.78e-10	5.31e-10	-364736	Negative	protein_coding	1481	Promoter non-target gene eQTMs
ENSG00000136114	cg27343363	THSD1	chr13	-3.66011	0.400855	1.47e-11	4.85e-11	-249630	Negative	protein_coding	1541	Promoter non-target gene eQTMs
ENSG00000124214	cg10951120	STAU1	chr20	-8.34078	1.78905	0.00970221	0.0134538	369372	Negative	protein_coding	1586	Promoter non-target gene eQTMs
ENSG00000150510	cg17240198	FAM124A	chr13	-21.0832	3.55573	0.00013547	0.00023108	-905118	Negative	protein_coding	1626	Promoter non-target gene eQTMs
ENSG00000129028	cg17516727	THAP10	chr15	-4.08349	0.71799	9.72e-05	0.00016865	-784807	Negative	protein_coding	1641	Promoter non-target gene eQTMs
ENSG00000214135	cg04079954	AC024560.3	chr3	-14.0389	0.843771	1.21e-28	2.37e-27	-280817	Negative	transcribed_unprocessed_pseudogene	1904	Promoter non-target gene eQTMs
ENSG00000198920	cg06421614	KIAA0753	chr17	-7.55047	0.431873	4.66e-28	8.48e-27	639650	Negative	protein_coding	1905	Promoter non-target gene eQTMs
ENSG00000186001	cg01083607	LRCH3	chr3	-16.6007	0.966852	3.71e-30	8.53e-29	493849	Negative	protein_coding	1923	Promoter non-target gene eQTMs
ENSG00000185621	cg01083607	LMLN	chr3	-12.245	0.905532	7.68e-21	6.35e-20	662823	Negative	protein_coding	1923	Promoter non-target gene eQTMs
ENSG00000114473	cg01083607	IQCG	chr3	-5.90756	0.575506	2.15e-14	9.33e-14	-591700	Positive	protein_coding	1923	Promoter non-target gene eQTMs
ENSG00000236438	cg01083607	FAM157A	chr3	3.45524	0.326268	1.96e-11	6.39e-11	855910	Negative	transcribed_unprocessed_pseudogene	1923	Promoter non-target gene eQTMs
ENSG00000279277	cg03187166	RP11-861A13.3	chr3	-1.09681	0.164907	5.38e-05	9.57e-05	56502	Negative	TEC	2067	Promoter non-target gene eQTMs
ENSG00000255856	cg01029623	RP11-87C12.5	chr12	0.269199	0.0350195	6.7e-08	1.58e-07	-428560	Positive	lincRNA	2141	Promoter non-target gene eQTMs
ENSG00000131732	cg01765545	ZCCHC9	chr5	-5.49955	0.359855	1.11e-26	1.75e-25	-448012	Positive	protein_coding	2198	Promoter non-target gene eQTMs
ENSG00000268201	cg26368011	CTD-3138B18.6	chr19	0.465365	0.0820351	0.00023692	0.00039472	150510	Positive	sense_intronic	2302	Promoter non-target gene eQTMs
ENSG00000106078	cg20336341	COBL	chr7	-19.0639	4.71221	0.0268515	0.0351494	-455068	Negative	protein_coding	-10426167	Distal non-target gene eQTMs
ENSG00000161914	cg19146379	ZNF653	chr19	-2.59939	0.142302	4.88e-29	9.86e-28	-939556	Negative	protein_coding	-9136302	Distal non-target gene eQTMs
ENSG00000102524	cg11476731	TNFSF13B	chr13	-0.254779	0.0579584	0.00899215	0.0125178	515931	Negative	protein_coding	-7060216	Distal non-target gene eQTMs
ENSG00000174405	cg05844614	LIG4	chr13	11.8917	2.38846	0.00074892	0.00118515	580096	Positive	protein_coding	-5907436	Distal non-target gene eQTMs
ENSG00000179476	cg06102017	C14orf28	chr14	-2.15794	0.298448	4.29e-08	1.03e-07	-63950	Positive	protein_coding	-5528725	Distal non-target gene eQTMs
ENSG00000179627	cg01801200	ZBTB42	chr14	-1.46492	0.157887	2.67e-10	7.83e-10	-500433	Negative	protein_coding	-4924224	Distal non-target gene eQTMs
ENSG00000198839	cg04515677	ZNF277	chr7	2.33238	0.300218	4.08e-08	9.84e-08	-243851	Negative	protein_coding	-3880773	Distal non-target gene eQTMs
ENSG00000204130	cg26160310	RUFY2	chr10	-6.7053	0.621076	1.03e-14	4.61e-14	-819992	Positive	protein_coding	-3856451	Distal non-target gene eQTMs
ENSG00000156256	cg13662262	USP16	chr21	-27.3534	2.59462	2.5e-14	1.08e-13	32055	Positive	protein_coding	-3256901	Distal non-target gene eQTMs
ENSG00000260495	cg01449408	RP11-55K13.1	chr16	0.605173	0.0705085	1.3e-09	3.6e-09	-413741	Positive	antisense	-2797577	Distal non-target gene eQTMs
ENSG00000182218	cg20478390	HHIPL1	chr14	4.84396	0.365501	2.49e-19	1.77e-18	378447	Positive	protein_coding	-2765230	Distal non-target gene eQTMs
ENSG00000245685	cg05527920	AF146191.4	chr4	0.694667	0.0385906	2.86e-35	1.3e-33	-640098	Positive	lincRNA	-2623296	Distal non-target gene eQTMs
ENSG00000283201	cg07687181	RP11-15H20.8	chr19	-0.370987	0.0285388	1.01e-21	9.15e-21	-676726	Negative	protein_coding	-2224724	Distal non-target gene eQTMs
ENSG00000197372	cg07687181	ZNF675	chr19	-1.15687	0.176711	4.25e-06	8.43e-06	-979602	Negative	protein_coding	-2224724	Distal non-target gene eQTMs
ENSG00000135074	cg10167834	ADAM19	chr5	-15.9598	2.85177	0.00010827	0.00018678	-252188	Negative	protein_coding	-2202276	Distal non-target gene eQTMs
ENSG00000113282	cg18587018	CLINT1	chr5	14.7147	2.66979	0.00034075	0.00055927	-642789	Positive	protein_coding	-2201884	Distal non-target gene eQTMs
ENSG00000130876	cg00169770	SLC7A10	chr19	-1.05806	0.172639	0.00044698	0.00072476	-864521	Negative	protein_coding	-2115853	Distal non-target gene eQTMs
ENSG00000263958	cg21529405	RP11-676J15.1	chr18	-2.67449	0.192971	1.05e-21	9.5e-21	324804	Positive	lincRNA	-2053954	Distal non-target gene eQTMs
ENSG00000265579	cg17952513	RP11-713C5.1	chr18	-8.47236	1.07398	2.77e-09	7.44e-09	-200966	Positive	sense_intronic	-2053160	Distal non-target gene eQTMs
ENSG00000182359	cg03998725	KBTBD3	chr11	-4.26464	0.400426	2.11e-15	1.01e-14	-188084	Positive	protein_coding	-1967743	Distal non-target gene eQTMs
ENSG00000155729	cg05142833	KCTD18	chr2	-3.80123	0.354058	3.03e-15	1.43e-14	-749163	Negative	protein_coding	-1935093	Distal non-target gene eQTMs
ENSG00000162971	cg05142833	TYW5	chr2	-10.3269	1.27467	4.83e-08	1.16e-07	-189118	Negative	protein_coding	-1935093	Distal non-target gene eQTMs
ENSG00000145362	cg05024939	ANK2	chr4	-281.404	44.0727	5.7e-06	1.12e-05	297014	Negative	protein_coding	-1905637	Distal non-target gene eQTMs
ENSG00000145349	cg03505117	CAMK2D	chr4	-40.3209	3.93275	5.43e-14	2.27e-13	-930580	Negative	protein_coding	-1904994	Distal non-target gene eQTMs
ENSG00000260526	cg10596237	RP11-73K9.2	chr4	-2.94182	0.346992	3.56e-09	9.48e-09	285849	Negative	antisense	-1899952	Distal non-target gene eQTMs
ENSG00000138660	cg10596237	AP1AR	chr4	-5.4376	0.860315	6.52e-06	1.27e-05	-283673	Negative	protein_coding	-1899952	Distal non-target gene eQTMs
ENSG00000174720	cg10596237	LARP7	chr4	-12.3498	2.63852	0.00942053	0.0130779	121697	Negative	protein_coding	-1899952	Distal non-target gene eQTMs
ENSG00000247765	cg14879127	RP11-32B5.7	chr15	2.80908	0.664128	0.00095262	0.00149019	942495	Positive	lincRNA	-1895992	Distal non-target gene eQTMs
ENSG00000166206	cg20005743	GABRB3	chr15	-43.5707	7.22011	1.77e-05	3.31e-05	323191	Negative	protein_coding	-1888154	Distal non-target gene eQTMs
ENSG00000156381	cg01145559	ANKRD9	chr14	-3.61985	0.506312	2.48e-06	5.03e-06	-362275	Negative	protein_coding	-1832945	Distal non-target gene eQTMs
ENSG00000185215	cg01145559	TNFAIP2	chr14	-2.98291	0.441296	6.57e-05	0.00011601	983950	Negative	protein_coding	-1832945	Distal non-target gene eQTMs
ENSG00000280237	cg16488737	MIR4697HG	chr11	9.48784	1.81199	0.0004542	0.00073605	-832109	Positive	TEC	-1693851	Distal non-target gene eQTMs
ENSG00000153922	cg00220905	CHD1	chr5	-10.5594	1.18619	5.03e-12	1.73e-11	-79144	Positive	protein_coding	-1685766	Distal non-target gene eQTMs
ENSG00000239268	cg07074160	RP11-384F7.2	chr3	1.40849	0.0801902	1.66e-29	3.51e-28	1145627	Negative	lincRNA	-1678392	Distal non-target gene eQTMs
ENSG00000176597	cg21668964	B3GNT5	chr3	1.08967	0.236529	0.0084954	0.0118686	610531	Positive	protein_coding	-1652952	Distal non-target gene eQTMs
ENSG00000156414	cg11177858	TDRD9	chr14	-3.24458	0.478793	0.00046457	0.00075187	-4230	Negative	protein_coding	-1627486	Distal non-target gene eQTMs
ENSG00000006468	cg27648147	ETV1	chr7	2.62491	0.534781	0.00066109	0.00105184	800529	Positive	protein_coding	-1590367	Distal non-target gene eQTMs
ENSG00000151789	cg08023500	ZNF385D	chr3	6.03877	1.6038	0.032515	0.0420308	339165	Positive	protein_coding	-1577139	Distal non-target gene eQTMs
ENSG00000163781	cg19260500	TOPBP1	chr3	11.2888	1.3018	2.16e-08	5.33e-08	652259	Positive	protein_coding	-1528684	Distal non-target gene eQTMs
ENSG00000182923	cg04945511	CEP63	chr3	8.73234	0.925427	3.55e-11	1.13e-10	235507	Positive	protein_coding	-1528464	Distal non-target gene eQTMs
ENSG00000112695	cg14861678	COX7A2	chr6	-26.8968	1.14414	3.4e-44	5.29e-42	-28590	Negative	protein_coding	-1513300	Distal non-target gene eQTMs
ENSG00000178573	cg06018531	MAF	chr16	10.5199	1.14195	1.32e-11	4.37e-11	14161	Positive	protein_coding	-1500591	Distal non-target gene eQTMs
ENSG00000176225	cg18824571	RTTN	chr18	-11.9218	0.823251	3.26e-25	4.34e-24	203073	Negative	protein_coding	-1490806	Distal non-target gene eQTMs
ENSG00000150637	cg18824571	CD226	chr18	-1.84293	0.180251	4.53e-14	1.9e-13	374946	Positive	protein_coding	-1490806	Distal non-target gene eQTMs
ENSG00000168038	cg03022575	ULK4	chr3	5.03432	0.689634	1.22e-07	2.81e-07	715581	Positive	protein_coding	-1437302	Distal non-target gene eQTMs
ENSG00000077235	cg04264560	GTF3C1	chr16	-32.8659	3.13598	2.98e-14	1.27e-13	-345808	Negative	protein_coding	-1421721	Distal non-target gene eQTMs
ENSG00000169047	cg07435537	IRS1	chr2	3.96397	0.311941	1.12e-18	7.42e-18	71479	Positive	protein_coding	-1403086	Distal non-target gene eQTMs
ENSG00000181722	cg04403629	ZBTB20	chr3	29.8955	2.5069	1.38e-15	6.74e-15	833926	Positive	protein_coding	-1402127	Distal non-target gene eQTMs
ENSG00000261996	cg26700610	CTC-281F24.1	chr17	0.441172	0.0962649	0.0115448	0.015849	352912	Positive	lincRNA	-1386952	Distal non-target gene eQTMs
ENSG00000068885	cg19139275	IFT80	chr3	-14.2099	1.31226	1.44e-14	6.36e-14	156830	Positive	protein_coding	-1344383	Distal non-target gene eQTMs
ENSG00000258498	cg01510933	DIO3OS	chr14	-5.04048	0.704384	4.75e-05	8.5e-05	69600	Positive	lincRNA	-1330365	Distal non-target gene eQTMs
ENSG00000139323	cg18227352	POC1B	chr12	-3.66983	0.392742	2.92e-12	1.03e-11	42218	Negative	protein_coding	-1319720	Distal non-target gene eQTMs
ENSG00000070961	cg18227352	ATP2B1	chr12	-18.4254	3.26679	4.37e-05	7.84e-05	-126113	Negative	protein_coding	-1319720	Distal non-target gene eQTMs
ENSG00000184277	cg12727528	TM2D3	chr15	26.5306	1.85863	2.48e-22	2.41e-21	30881	Positive	protein_coding	-1310320	Distal non-target gene eQTMs
ENSG00000259660	cg03707742	DNM1P47	chr15	0.913816	0.0719202	1e-16	5.45e-16	109685	Positive	transcribed_unprocessed_pseudogene	-1299342	Distal non-target gene eQTMs
ENSG00000185596	cg03707742	WASH3P	chr15	13.08	1.57392	1.98e-09	5.39e-09	320256	Positive	transcribed_unprocessed_pseudogene	-1299342	Distal non-target gene eQTMs
ENSG00000189403	cg04368762	HMGB1	chr13	-73.9317	13.5724	0.00074633	0.00118158	-341976	Positive	protein_coding	-1294380	Distal non-target gene eQTMs
ENSG00000135314	cg08720478	KHDC1	chr6	-0.640072	0.0769887	6.95e-10	1.97e-09	-60238	Negative	protein_coding	-1294373	Distal non-target gene eQTMs
ENSG00000247828	cg20375844	TMEM161B-AS1	chr5	16.6227	0.708817	5.94e-46	1.3e-43	-422214	Positive	antisense	-1270658	Distal non-target gene eQTMs
ENSG00000245864	cg20375844	CTC-467M3.1	chr5	0.507629	0.0299407	4.54e-22	4.29e-21	-15072	Positive	antisense	-1270658	Distal non-target gene eQTMs
ENSG00000164180	cg20375844	TMEM161B	chr5	-7.08634	0.585783	6.96e-18	4.28e-17	501472	Positive	protein_coding	-1270658	Distal non-target gene eQTMs
ENSG00000111196	cg10839265	MAGOHB	chr12	-3.42794	0.283137	9.1e-18	5.55e-17	882584	Positive	protein_coding	-1260719	Distal non-target gene eQTMs
ENSG00000255837	cg10839265	TAS2R20	chr12	-1.12474	0.100583	3.99e-16	2.05e-15	490282	Negative	protein_coding	-1260719	Distal non-target gene eQTMs
ENSG00000212124	cg05075288	TAS2R19	chr12	-0.252559	0.0457957	0.00525567	0.0075489	465097	Negative	protein_coding	-1260658	Distal non-target gene eQTMs
ENSG00000197406	cg06770163	DIO3	chr14	7.00879	0.972135	0.0298211	0.0387308	-66930	Negative	protein_coding	-1251863	Distal non-target gene eQTMs
ENSG00000198914	cg14956808	POU3F3	chr2	0.473222	0.0438061	1.64e-14	7.21e-14	442936	Positive	protein_coding	-1236315	Distal non-target gene eQTMs
ENSG00000107562	cg26781482	CXCL12	chr10	-1.44641	0.35367	0.0357562	0.0459637	487731	Negative	protein_coding	-1229079	Distal non-target gene eQTMs
ENSG00000159387	cg07254066	IRX6	chr16	1.97584	0.154081	2.86e-18	1.83e-17	391777	Negative	protein_coding	-1228045	Distal non-target gene eQTMs
ENSG00000087245	cg07254066	MMP2	chr16	5.62045	0.734696	3.53e-08	8.56e-08	457717	Positive	protein_coding	-1228045	Distal non-target gene eQTMs
ENSG00000163378	cg16725723	EOGT	chr3	-3.30824	0.386571	7.06e-10	2e-09	-98833	Negative	protein_coding	-1221770	Distal non-target gene eQTMs
ENSG00000225973	cg11883339	PIGBOS1	chr15	-1.06905	0.141984	3.12e-08	7.6e-08	-120855	Negative	protein_coding	-1219421	Distal non-target gene eQTMs
ENSG00000234807	cg23656542	LINC01135	chr1	1.06344	0.0615048	8.94e-26	1.27e-24	-974712	Positive	lincRNA	-1213106	Distal non-target gene eQTMs
ENSG00000173175	cg20770540	ADCY5	chr3	7.87654	0.797642	7.23e-12	2.46e-11	302860	Negative	protein_coding	-1201925	Distal non-target gene eQTMs
ENSG00000123901	cg09074260	GPR83	chr11	-0.704381	0.0948601	8.34e-07	1.77e-06	596569	Negative	protein_coding	-1189658	Distal non-target gene eQTMs
ENSG00000213593	cg12719086	TMX2	chr11	-17.1503	1.81342	8.74e-13	3.24e-12	-801567	Negative	protein_coding	-1175786	Distal non-target gene eQTMs
ENSG00000171729	cg15188947	TMEM51	chr1	-0.339145	0.0747079	0.0160202	0.0215669	95355	Negative	protein_coding	-1164385	Distal non-target gene eQTMs
ENSG00000242156	cg13013297	AC000041.8	chr22	0.419242	0.0545425	2.35e-07	5.27e-07	-344043	Positive	unprocessed_pseudogene	-1155736	Distal non-target gene eQTMs
ENSG00000131876	cg02626646	SNRPA1	chr15	12.3898	1.09194	7.54e-16	3.78e-15	215580	Negative	protein_coding	-1155085	Distal non-target gene eQTMs
ENSG00000250320	cg19258328	CTD-2269F5.1	chr5	1.14707	0.0526502	9.01e-38	5.74e-36	951902	Positive	antisense	-1151060	Distal non-target gene eQTMs
ENSG00000147874	cg16846489	HAUS6	chr9	8.08686	0.729484	4.24e-16	2.17e-15	-3679	Positive	protein_coding	-1142899	Distal non-target gene eQTMs
ENSG00000137154	cg15485113	RPS6	chr9	87.5401	8.84308	6.04e-14	2.51e-13	-326316	Positive	protein_coding	-1142836	Distal non-target gene eQTMs
ENSG00000093144	cg01043019	ECHDC1	chr6	-15.2828	1.84623	1.3e-09	3.6e-09	-169347	Positive	protein_coding	-1132935	Distal non-target gene eQTMs
ENSG00000118518	cg07279933	RNF146	chr6	-22.9658	1.89189	1.82e-18	1.18e-17	147342	Negative	protein_coding	-1132838	Distal non-target gene eQTMs
ENSG00000152894	cg07279933	PTPRK	chr6	-8.37243	1.38535	1.66e-05	3.11e-05	-849511	Negative	protein_coding	-1132838	Distal non-target gene eQTMs
ENSG00000189367	cg09494357	KIAA0408	chr6	-16.6845	1.45844	1.89e-16	1e-15	-319543	Negative	protein_coding	-1132433	Distal non-target gene eQTMs
ENSG00000226471	cg27269921	CTA-292E10.6	chr22	0.219388	0.0283066	9.28e-09	2.37e-08	999580	Positive	antisense	-1128336	Distal non-target gene eQTMs
ENSG00000159873	cg00278028	CCDC117	chr22	-10.1551	1.45563	1.63e-06	3.37e-06	971828	Positive	protein_coding	-1128079	Distal non-target gene eQTMs
ENSG00000180957	cg00278028	PITPNB	chr22	-8.67437	1.28825	4.63e-06	9.14e-06	-50823	Positive	protein_coding	-1128079	Distal non-target gene eQTMs
ENSG00000218283	cg10211079	MORF4L1P1	chr1	-1.98608	0.438827	0.00621891	0.00885141	840744	Negative	processed_pseudogene	-1127539	Distal non-target gene eQTMs
ENSG00000152214	cg24534145	RIT2	chr18	-0.534773	0.124738	0.00482205	0.00695565	535095	Negative	protein_coding	-1119039	Distal non-target gene eQTMs
ENSG00000120688	cg09795308	WBP4	chr13	10.0761	1.64899	1.96e-05	3.64e-05	290313	Positive	protein_coding	-1115569	Distal non-target gene eQTMs
ENSG00000197102	cg22369521	DYNC1H1	chr14	111.87	22.7336	0.00389736	0.00568008	483381	Negative	protein_coding	-1104774	Distal non-target gene eQTMs
ENSG00000204177	cg20036869	BMS1P1	chr10	5.43339	1.14348	0.00105185	0.00163842	-597634	Positive	transcribed_unprocessed_pseudogene	-1097963	Distal non-target gene eQTMs
ENSG00000277758	cg27067269	ABC7-42404400C24.1	chr10	1.07551	0.146732	6.5e-08	1.54e-07	-366573	Positive	protein_coding	-1097946	Distal non-target gene eQTMs
ENSG00000231252	cg16379336	RP11-436K8.1	chr1	-1.13351	0.209418	0.00028057	0.00046384	-891927	Negative	lincRNA	-1052095	Distal non-target gene eQTMs
ENSG00000103274	cg08621611	NUBP1	chr16	-2.27531	0.269557	1.02e-09	2.85e-09	560389	Negative	protein_coding	-1026516	Distal non-target gene eQTMs
ENSG00000275409	cg19213167	RP11-131L12.4	chr12	0.643684	0.149042	0.013422	0.0182536	-968221	Positive	lincRNA	-1021988	Distal non-target gene eQTMs
ENSG00000178502	cg02570171	KLHL11	chr17	18.4064	0.97236	1.95e-29	4.09e-28	-182575	Positive	protein_coding	-1017435	Distal non-target gene eQTMs
ENSG00000131470	cg02570171	PSMC3IP	chr17	-1.5902	0.218287	7.64e-07	1.63e-06	-906372	Negative	protein_coding	-1017435	Distal non-target gene eQTMs
ENSG00000185551	cg09969043	NR2F2	chr15	2.30653	0.11339	3.09e-38	2.11e-36	196	Positive	protein_coding	-998613	Distal non-target gene eQTMs
ENSG00000181790	cg00390735	ADGRB1	chr8	15.3467	0.744476	1.48e-33	5.27e-32	-22645	Positive	protein_coding	-964845	Distal non-target gene eQTMs
ENSG00000171045	cg00390735	TSNARE1	chr8	3.87297	0.242406	2.15e-24	2.62e-23	259995	Positive	protein_coding	-964845	Distal non-target gene eQTMs
ENSG00000011405	cg21171314	PIK3C2A	chr11	-31.1756	4.05386	5.19e-08	1.24e-07	-470637	Negative	protein_coding	-963208	Distal non-target gene eQTMs
ENSG00000188162	cg16208240	OTOG	chr11	4.14472	0.439249	5.15e-11	1.62e-10	941270	Positive	protein_coding	-962218	Distal non-target gene eQTMs
ENSG00000188211	cg05944193	NCR3LG1	chr11	-1.69507	0.218808	1.85e-07	4.19e-07	745946	Negative	protein_coding	-961895	Distal non-target gene eQTMs
ENSG00000167842	cg15847614	MIS12	chr17	-10.9918	0.595362	6.96e-30	1.54e-28	-958414	Positive	protein_coding	-957888	Distal non-target gene eQTMs
ENSG00000174327	cg27248073	SLC16A13	chr17	0.432737	0.0368246	7.07e-14	2.91e-13	591668	Positive	protein_coding	-957596	Distal non-target gene eQTMs
ENSG00000087470	cg24786579	DNM1L	chr12	27.7597	3.72338	3.72e-08	9e-08	-327	Positive	protein_coding	-950353	Distal non-target gene eQTMs
ENSG00000165644	cg16221975	COMTD1	chr10	1.78025	0.103308	9.08e-30	1.98e-28	-133381	Positive	protein_coding	-949403	Distal non-target gene eQTMs
ENSG00000165637	cg16221975	VDAC2	chr10	-31.4177	2.3269	1.52e-21	1.35e-20	109566	Positive	protein_coding	-949403	Distal non-target gene eQTMs
ENSG00000075188	cg23455102	NUP37	chr12	-2.31405	0.16794	1.12e-22	1.13e-21	743956	Positive	protein_coding	-939708	Distal non-target gene eQTMs
ENSG00000111670	cg23455102	GNPTAB	chr12	-4.89358	0.477674	3.57e-13	1.38e-12	1071560	Positive	protein_coding	-939708	Distal non-target gene eQTMs
ENSG00000043591	cg01246622	ADRB1	chr10	1.01143	0.190058	0.00069681	0.00110557	661988	Positive	protein_coding	-935070	Distal non-target gene eQTMs
ENSG00000150433	cg13479898	TMEM218	chr11	10.9386	0.702812	5.34e-25	6.96e-24	791006	Positive	protein_coding	-933430	Distal non-target gene eQTMs
ENSG00000099381	cg06170266	SETD1A	chr16	11.4159	0.503679	3.88e-39	2.87e-37	-916934	Negative	protein_coding	-926302	Distal non-target gene eQTMs
ENSG00000167395	cg06170266	ZNF646	chr16	4.04249	0.288893	5.96e-21	4.98e-20	-800266	Positive	protein_coding	-926302	Distal non-target gene eQTMs
ENSG00000125304	cg15770278	TM9SF2	chr13	12.3909	1.83438	3.28e-06	6.57e-06	-1082355	Positive	protein_coding	-921997	Distal non-target gene eQTMs
ENSG00000168255	cg01890075	POLR2J3	chr7	-13.9684	2.75973	0.00188582	0.00285643	-254642	Negative	protein_coding	-920456	Distal non-target gene eQTMs
ENSG00000267368	cg01890075	UPK3BL	chr7	-9.88667	1.90875	0.00190236	0.00287901	-353749	Negative	protein_coding	-920456	Distal non-target gene eQTMs
ENSG00000154175	cg24120800	ABI3BP	chr3	35.6986	7.15384	0.00173563	0.00263987	-12554	Positive	protein_coding	-918768	Distal non-target gene eQTMs
ENSG00000100359	cg18771605	SGSM3	chr22	-24.424	2.26295	1.13e-14	5.04e-14	46	Negative	protein_coding	-913201	Distal non-target gene eQTMs
ENSG00000187051	cg18771605	RPS19BP1	chr22	-10.7005	1.02245	9.42e-14	3.83e-13	841452	Positive	protein_coding	-913201	Distal non-target gene eQTMs
ENSG00000100401	cg18771605	RANGAP1	chr22	-29.3865	3.63866	1.71e-09	4.69e-09	-875066	Negative	protein_coding	-913201	Distal non-target gene eQTMs
ENSG00000168785	cg04759619	TSPAN5	chr4	-12.1396	0.876626	2.79e-23	3e-22	585825	Negative	protein_coding	-912952	Distal non-target gene eQTMs
ENSG00000138698	cg04759619	RAP1GDS1	chr4	-23.4819	1.99822	2.45e-18	1.58e-17	-794808	Positive	protein_coding	-912952	Distal non-target gene eQTMs
ENSG00000151092	cg03531687	NGLY1	chr3	-22.1113	2.55759	1.33e-10	4.01e-10	-121884	Negative	protein_coding	-909141	Distal non-target gene eQTMs
ENSG00000077097	cg03531687	TOP2B	chr3	-173.988	28.6356	1.72e-05	3.22e-05	-845	Negative	protein_coding	-909141	Distal non-target gene eQTMs
ENSG00000136051	cg04637204	KIAA1033	chr12	-15.4429	1.42143	2.99e-14	1.28e-13	-1031389	Positive	protein_coding	-903423	Distal non-target gene eQTMs
ENSG00000183091	cg11626656	NEB	chr2	-1.45397	0.245285	0.00013376	0.00022836	-997982	Negative	protein_coding	-900158	Distal non-target gene eQTMs
ENSG00000270171	cg25763306	RP11-338N10.1	chr1	-3.61837	0.332374	2.38e-14	1.03e-13	-11968	Negative	lincRNA	-895832	Distal non-target gene eQTMs
ENSG00000156650	cg09622269	KAT6B	chr10	-8.61114	1.78911	0.00234354	0.00351042	-219240	Negative	protein_coding	-892982	Distal non-target gene eQTMs
ENSG00000259553	cg01435442	MIR1302-10	chr15	3.34674	0.21857	5.97e-24	6.97e-23	-726619	Positive	lincRNA	-890915	Distal non-target gene eQTMs
ENSG00000128606	cg15625092	LRRC17	chr7	0.604549	0.121003	0.00135962	0.00208912	662549	Positive	protein_coding	-887631	Distal non-target gene eQTMs
ENSG00000071994	cg23350446	PDCD2	chr6	-4.67474	0.448879	8.91e-15	4.02e-14	8799	Positive	protein_coding	-882046	Distal non-target gene eQTMs
ENSG00000136379	cg05586392	ABHD17C	chr15	9.28753	1.03996	8.03e-11	2.47e-10	504723	Positive	protein_coding	-863899	Distal non-target gene eQTMs
ENSG00000156206	cg05586392	CFAP161	chr15	0.57321	0.0929233	7.94e-05	0.00013906	832072	Positive	protein_coding	-863899	Distal non-target gene eQTMs
ENSG00000248550	cg08243676	OTX2-AS1	chr14	12.6263	1.68862	3.07e-08	7.48e-08	390638	Positive	lincRNA	-863473	Distal non-target gene eQTMs
ENSG00000196776	cg08932533	CD47	chr3	-72.1015	5.95317	1.01e-19	7.47e-19	50820	Negative	protein_coding	-853270	Distal non-target gene eQTMs
ENSG00000240303	cg20182189	ACAD11	chr3	-14.3418	0.818184	2.46e-33	8.46e-32	1015230	Negative	protein_coding	-851618	Distal non-target gene eQTMs
ENSG00000116983	cg15985196	HPCAL4	chr1	15.5421	3.53001	0.0146005	0.0197616	-818857	Positive	protein_coding	-850533	Distal non-target gene eQTMs
ENSG00000205544	cg17080573	TMEM256	chr17	2.8472	0.232019	1.22e-16	6.59e-16	-943843	Positive	protein_coding	-839708	Distal non-target gene eQTMs
ENSG00000224961	cg08942131	RP1-278O22.1	chr20	0.237251	0.0547459	0.0200185	0.0265769	-577066	Positive	lincRNA	-838712	Distal non-target gene eQTMs
ENSG00000122026	cg27499259	RPL21	chr13	-98.2028	5.91539	9.2e-30	2.01e-28	-575478	Negative	protein_coding	-834791	Distal non-target gene eQTMs
ENSG00000145075	cg23801974	CCDC39	chr3	-4.33512	0.223299	1.39e-34	5.75e-33	1086660	Negative	protein_coding	-832527	Distal non-target gene eQTMs
ENSG00000257621	cg16966357	PSMA3-AS1	chr14	-19.8789	1.45637	7.05e-22	6.5e-21	-947925	Negative	antisense	-829086	Distal non-target gene eQTMs
ENSG00000013392	cg00081666	RWDD2A	chr6	-2.85835	0.256633	9.46e-16	4.7e-15	125731	Negative	protein_coding	-819872	Distal non-target gene eQTMs
ENSG00000065609	cg19179973	SNAP91	chr6	62.9765	8.71202	1.85e-07	4.19e-07	-487045	Positive	protein_coding	-818081	Distal non-target gene eQTMs
ENSG00000164022	cg18057564	AIMP1	chr4	-5.64485	0.630266	9.37e-12	3.15e-11	-867745	Negative	protein_coding	-815854	Distal non-target gene eQTMs
ENSG00000138801	cg18057564	PAPSS1	chr4	-2.52498	0.374461	9.02e-07	1.91e-06	-406987	Positive	protein_coding	-815854	Distal non-target gene eQTMs
ENSG00000155016	cg18057564	CYP2U1	chr4	-1.65596	0.295254	0.00066847	0.00106271	748260	Positive	protein_coding	-815854	Distal non-target gene eQTMs
ENSG00000100380	cg12224556	ST13	chr22	49.2392	9.80394	0.00173206	0.00263513	-478513	Positive	protein_coding	-813167	Distal non-target gene eQTMs
ENSG00000120662	cg10480382	MTRF1	chr13	-1.04216	0.107907	6.2e-12	2.12e-11	894299	Negative	protein_coding	-799463	Distal non-target gene eQTMs
ENSG00000102780	cg10480382	DGKH	chr13	-5.6786	0.756134	1.04e-07	2.41e-07	-70632	Negative	protein_coding	-799463	Distal non-target gene eQTMs
ENSG00000226084	cg20417424	RP4-706A16.3	chr1	0.318339	0.0733574	0.013927	0.0188966	262859	Positive	processed_pseudogene	-791536	Distal non-target gene eQTMs
ENSG00000081923	cg25800170	ATP8B1	chr18	0.407891	0.0926419	0.0207163	0.0274535	-211653	Positive	protein_coding	-783430	Distal non-target gene eQTMs
ENSG00000174446	cg12605747	SNAPC5	chr15	-3.98689	0.344755	3.68e-16	1.9e-15	15970	Negative	protein_coding	-780051	Distal non-target gene eQTMs
ENSG00000103591	cg12605747	AAGAB	chr15	-12.038	1.03846	2.25e-14	9.75e-14	-694928	Negative	protein_coding	-780051	Distal non-target gene eQTMs
ENSG00000259956	cg02619135	RBM15B	chr3	25.7213	3.48336	8.06e-07	1.71e-06	276	Positive	protein_coding	-779489	Distal non-target gene eQTMs
ENSG00000140479	cg07324702	PCSK6	chr15	6.55214	1.14452	9.8e-05	0.00016997	23690	Positive	protein_coding	-775837	Distal non-target gene eQTMs
ENSG00000114735	cg15881088	HEMK1	chr3	-13.4717	1.8182	3.12e-07	6.91e-07	-815791	Negative	protein_coding	-773423	Distal non-target gene eQTMs
ENSG00000114779	cg15881088	ABHD14B	chr3	-18.7958	3.55483	0.00132798	0.00204301	-583567	Negative	protein_coding	-773423	Distal non-target gene eQTMs
ENSG00000247596	cg18861151	TWF2	chr3	5.23659	0.268014	3.87e-34	1.49e-32	-843370	Positive	protein_coding	-773411	Distal non-target gene eQTMs
ENSG00000114738	cg04007931	MAPKAPK3	chr3	4.51985	0.638613	4.31e-06	8.54e-06	-773577	Positive	protein_coding	-773266	Distal non-target gene eQTMs
ENSG00000150477	cg15139222	KIAA1328	chr18	-3.49347	0.238849	2.64e-24	3.2e-23	-332	Negative	protein_coding	-761862	Distal non-target gene eQTMs
ENSG00000101489	cg24571477	CELF4	chr18	-23.8352	1.46434	4.36e-26	6.42e-25	-413817	Negative	protein_coding	-761647	Distal non-target gene eQTMs
ENSG00000134759	cg24571477	ELP2	chr18	23.3906	1.52225	1.11e-23	1.25e-22	-699779	Positive	protein_coding	-761647	Distal non-target gene eQTMs
ENSG00000141424	cg24571477	SLC39A6	chr18	19.2006	2.78933	1.55e-06	3.21e-06	720692	Positive	protein_coding	-761647	Distal non-target gene eQTMs
ENSG00000142867	cg22372968	BCL10	chr1	0.665754	0.169847	0.0373954	0.0479375	-507123	Positive	protein_coding	-759503	Distal non-target gene eQTMs
ENSG00000235652	cg26241788	RP11-545I5.3	chr6	2.8776	0.276945	3.76e-15	1.76e-14	-1035602	Positive	antisense	-757873	Distal non-target gene eQTMs
ENSG00000178075	cg01901898	GRAMD1C	chr3	-13.2611	0.91596	9.7e-22	8.81e-21	81400	Positive	protein_coding	-755629	Distal non-target gene eQTMs
ENSG00000184307	cg01901898	ZDHHC23	chr3	-2.79305	0.268135	8.5e-14	3.48e-13	201119	Negative	protein_coding	-755629	Distal non-target gene eQTMs
ENSG00000151576	cg26446348	QTRT2	chr3	6.76435	0.848706	2.38e-09	6.44e-09	259354	Negative	protein_coding	-755326	Distal non-target gene eQTMs
ENSG00000116652	cg15654686	DLEU2L	chr1	-2.00499	0.158914	1.85e-19	1.33e-18	23671	Negative	sense_intronic	-739276	Distal non-target gene eQTMs
ENSG00000235545	cg15654686	RP11-230B22.1	chr1	-0.199691	0.02749	2.42e-07	5.42e-07	-834929	Negative	antisense	-739276	Distal non-target gene eQTMs
ENSG00000106009	cg01632311	BRAT1	chr7	-11.1273	0.749862	9.36e-25	1.19e-23	-295660	Positive	protein_coding	-737783	Distal non-target gene eQTMs
ENSG00000136295	cg22516733	TTYH3	chr7	-25.9188	1.65435	8.62e-20	6.44e-19	390004	Negative	protein_coding	-737615	Distal non-target gene eQTMs
ENSG00000187607	cg10855528	ZNF286A	chr17	4.21939	0.604845	4.99e-07	1.08e-06	-299904	Positive	protein_coding	-734155	Distal non-target gene eQTMs
ENSG00000136450	cg02025083	SRSF1	chr17	-81.445	4.75658	3.64e-28	6.67e-27	-13985	Negative	protein_coding	-731083	Distal non-target gene eQTMs
ENSG00000272189	cg03778398	RP3-325F22.5	chr6	0.170003	0.0272635	1.78e-05	3.33e-05	324759	Positive	antisense	-728126	Distal non-target gene eQTMs
ENSG00000121060	cg06530089	TRIM25	chr17	-8.10162	0.596173	3.56e-22	3.4e-21	-357327	Negative	protein_coding	-728081	Distal non-target gene eQTMs
ENSG00000221947	cg19632760	XKR9	chr8	-2.84046	0.367831	1.37e-07	3.14e-07	-129	Negative	protein_coding	-726546	Distal non-target gene eQTMs
ENSG00000166037	cg24425560	CEP57	chr11	17.027	1.26727	2.09e-21	1.82e-20	183	Positive	protein_coding	-722585	Distal non-target gene eQTMs
ENSG00000260037	cg08337773	CTD-2524L6.3	chr15	-6.34028	1.16642	0.00181454	0.00275393	10161	Negative	antisense	-711283	Distal non-target gene eQTMs
ENSG00000184254	cg02208308	ALDH1A3	chr15	-5.5227	0.808784	0.0180759	0.024131	-174232	Negative	protein_coding	-709941	Distal non-target gene eQTMs
ENSG00000131023	cg17478979	LATS1	chr6	-5.74354	1.29876	0.0103303	0.014271	-207139	Negative	protein_coding	-703686	Distal non-target gene eQTMs
ENSG00000082684	ch.3.2410502F	SEMA5B	chr3	5.50001	0.771113	2.13e-05	3.94e-05	588643	Positive	protein_coding	-702930	Distal non-target gene eQTMs
ENSG00000266709	cg15119650	RP11-214O1.2	chr17	1.25846	0.257538	0.00278771	0.0041394	1368	Positive	lincRNA	-700559	Distal non-target gene eQTMs
ENSG00000227885	cg16611220	RP11-79N23.1	chr6	0.3699	0.026182	6.47e-22	6e-21	-677100	Positive	lincRNA	-700043	Distal non-target gene eQTMs
ENSG00000112146	cg16611220	FBXO9	chr6	-14.9605	1.74946	1.39e-10	4.19e-10	-10175	Positive	protein_coding	-700043	Distal non-target gene eQTMs
ENSG00000266378	cg17639046	RP11-214O1.3	chr17	0.86144	0.10067	1.78e-08	4.43e-08	26625	Positive	lincRNA	-698783	Distal non-target gene eQTMs
ENSG00000205325	cg17639046	AC005863.1	chr17	-8.24014	1.1461	1.12e-07	2.59e-07	-466873	Positive	lincRNA	-698783	Distal non-target gene eQTMs
ENSG00000104267	cg15741822	CA2	chr8	62.7901	10.5491	3.68e-05	6.66e-05	-606167	Positive	protein_coding	-696699	Distal non-target gene eQTMs
ENSG00000003137	cg15392489	CYP26B1	chr2	10.6838	1.60055	0.00016562	0.00028018	19245	Positive	protein_coding	-694761	Distal non-target gene eQTMs
ENSG00000262180	cg22265501	OCLM	chr1	-0.393918	0.0283614	1.85e-23	2.03e-22	-584992	Negative	protein_coding	-689759	Distal non-target gene eQTMs
ENSG00000228238	cg22265501	GS1-304P7.2	chr1	-0.336471	0.0349296	6.69e-13	2.51e-12	-407759	Negative	processed_pseudogene	-689759	Distal non-target gene eQTMs
ENSG00000131323	cg08139206	TRAF3	chr14	-4.8434	0.391014	4.24e-18	2.66e-17	-504505	Negative	protein_coding	-689320	Distal non-target gene eQTMs
ENSG00000157869	cg01370643	RAB28	chr4	-17.489	1.59215	9.15e-16	4.55e-15	185154	Negative	protein_coding	-681547	Distal non-target gene eQTMs
ENSG00000115365	cg18774447	LANCL1	chr2	-22.9062	2.8419	6.72e-11	2.08e-10	726790	Negative	protein_coding	-680357	Distal non-target gene eQTMs
ENSG00000115295	cg06591652	CLIP4	chr2	-34.1196	4.52508	4.49e-08	1.08e-07	704943	Positive	protein_coding	-677030	Distal non-target gene eQTMs
ENSG00000163785	cg06821582	RYK	chr3	6.13766	0.489862	4.14e-16	2.12e-15	-668205	Positive	protein_coding	-675348	Distal non-target gene eQTMs
ENSG00000182944	cg05013337	EWSR1	chr22	-22.2445	3.79241	6.99e-05	0.00012313	672905	Negative	protein_coding	-674970	Distal non-target gene eQTMs
ENSG00000085511	cg06408459	MAP3K4	chr6	-12.0573	0.590596	8.58e-39	6.18e-37	-382425	Positive	protein_coding	-671914	Distal non-target gene eQTMs
ENSG00000214491	cg13936783	SEC14L6	chr22	-5.25203	1.03275	0.00889523	0.0123913	-435527	Negative	protein_coding	-664093	Distal non-target gene eQTMs
ENSG00000100314	cg13936783	CABP7	chr22	-3.17451	0.631179	0.0236317	0.0311176	-367269	Negative	protein_coding	-664093	Distal non-target gene eQTMs
ENSG00000159200	cg07884414	RCAN1	chr21	-3.48013	0.392819	5.64e-09	1.47e-08	887941	Negative	protein_coding	-655326	Distal non-target gene eQTMs
ENSG00000146776	cg14140881	ATXN7L1	chr7	-0.921108	0.232285	0.0367461	0.0471436	-23495	Negative	protein_coding	-654927	Distal non-target gene eQTMs
ENSG00000203965	cg09208651	EFCAB7	chr1	-6.18463	0.456343	3.09e-21	2.66e-20	-720387	Negative	protein_coding	-650483	Distal non-target gene eQTMs
ENSG00000142856	cg09208651	ITGB3BP	chr1	-2.04825	0.256797	4e-09	1.06e-08	802989	Negative	protein_coding	-650483	Distal non-target gene eQTMs
ENSG00000250565	cg25225793	ATP6V1E2	chr2	1.39502	0.227817	3.24e-05	5.9e-05	-193459	Positive	protein_coding	-645946	Distal non-target gene eQTMs
ENSG00000255823	cg09210514	MTRNR2L8	chr11	73.2588	11.7949	0.00859201	0.0119969	-204845	Negative	protein_coding	-638965	Distal non-target gene eQTMs
ENSG00000144357	cg09392443	UBR3	chr2	-37.7143	3.98885	6.43e-13	2.42e-12	-989018	Negative	protein_coding	-638331	Distal non-target gene eQTMs
ENSG00000187118	cg16910340	CMC1	chr3	-2.10947	0.201281	1.11e-13	4.47e-13	-107227	Positive	protein_coding	-635901	Distal non-target gene eQTMs
ENSG00000180353	cg04294566	HCLS1	chr3	-3.33439	0.641678	0.000706	0.00112006	752606	Negative	protein_coding	-634238	Distal non-target gene eQTMs
ENSG00000114023	cg04294566	FAM162A	chr3	-45.4389	8.31764	0.00081706	0.00128729	171	Negative	protein_coding	-634238	Distal non-target gene eQTMs
ENSG00000113580	cg20753294	NR3C1	chr5	-2.66209	0.522976	0.00108296	0.00168448	125295	Negative	protein_coding	-632842	Distal non-target gene eQTMs
ENSG00000198146	cg19775417	ZNF770	chr15	10.1891	2.03422	0.00134406	0.00206592	-388695	Negative	protein_coding	-620926	Distal non-target gene eQTMs
ENSG00000182196	cg06606198	ARL6IP4	chr12	-29.1697	1.75791	2.26e-27	3.85e-26	-622120	Negative	protein_coding	-620531	Distal non-target gene eQTMs
ENSG00000130787	cg06606198	HIP1R	chr12	-19.2159	1.68352	2e-16	1.06e-15	-767727	Negative	protein_coding	-620531	Distal non-target gene eQTMs
ENSG00000182405	cg19301526	PGBD4	chr15	-1.75135	0.21753	4.88e-09	1.28e-08	-486431	Negative	protein_coding	-619794	Distal non-target gene eQTMs
ENSG00000169857	cg19301526	AVEN	chr15	-0.643494	0.0940251	7.33e-05	0.00012884	722287	Negative	protein_coding	-619794	Distal non-target gene eQTMs
ENSG00000171202	cg24895623	TMEM126A	chr11	-3.1816	0.234749	1.31e-19	9.58e-19	-654339	Negative	protein_coding	-616029	Distal non-target gene eQTMs
ENSG00000127364	cg01592890	TAS2R4	chr7	-0.282825	0.0500931	7.81e-05	0.00013689	244939	Positive	protein_coding	-608739	Distal non-target gene eQTMs
ENSG00000048707	cg08202444	VPS13D	chr1	53.528	5.16375	2.33e-13	9.15e-13	575276	Positive	protein_coding	-607521	Distal non-target gene eQTMs
ENSG00000132879	cg08202444	FBXO44	chr1	-11.2726	1.45801	2.16e-08	5.33e-08	-379	Negative	protein_coding	-607521	Distal non-target gene eQTMs
ENSG00000197415	cg24725175	VEPH1	chr3	0.624695	0.138338	0.024904	0.0327121	-98622	Positive	protein_coding	-605936	Distal non-target gene eQTMs
ENSG00000230457	cg10191882	PA2G4P4	chr3	-0.149317	0.0315154	0.00380557	0.00555137	349540	Negative	processed_pseudogene	-603907	Distal non-target gene eQTMs
ENSG00000136098	cg11987576	NEK3	chr13	-1.45049	0.156462	1.93e-12	6.92e-12	-328481	Negative	protein_coding	-603906	Distal non-target gene eQTMs
ENSG00000213385	cg02775353	RP11-577H5.1	chr7	0.794992	0.164764	0.00227324	0.00341064	584317	Positive	processed_pseudogene	-601823	Distal non-target gene eQTMs
ENSG00000109323	cg02214188	MANBA	chr4	-2.77572	0.23144	7.96e-20	5.96e-19	469022	Negative	protein_coding	-598463	Distal non-target gene eQTMs
ENSG00000109332	cg02214188	UBE2D3	chr4	-16.2048	2.01836	1.39e-09	3.84e-09	305409	Negative	protein_coding	-598463	Distal non-target gene eQTMs
ENSG00000146350	cg19401895	TBC1D32	chr6	-13.3599	1.41256	7.05e-13	2.64e-12	954303	Negative	protein_coding	-598105	Distal non-target gene eQTMs
ENSG00000277715	cg23461906	RP11-651L5.3	chr12	-2.03914	0.424664	0.00253973	0.00378815	-704654	Negative	antisense	-597755	Distal non-target gene eQTMs
ENSG00000186487	cg07000611	MYT1L	chr2	12.7964	2.26969	0.00015555	0.00026358	-242131	Positive	protein_coding	-596114	Distal non-target gene eQTMs
ENSG00000140471	cg14291878	LINS1	chr15	4.01163	0.395193	2.48e-13	9.73e-13	639042	Negative	protein_coding	-595877	Distal non-target gene eQTMs
ENSG00000131871	cg14291878	VIMP	chr15	3.58657	0.428856	8.05e-09	2.07e-08	-72406	Negative	protein_coding	-595877	Distal non-target gene eQTMs
ENSG00000162105	cg15330584	SHANK2	chr11	23.5227	2.36714	5.13e-12	1.76e-11	-827112	Positive	protein_coding	-591847	Distal non-target gene eQTMs
ENSG00000131620	cg15330584	ANO1	chr11	1.85714	0.385049	0.0185848	0.0247634	437558	Positive	protein_coding	-591847	Distal non-target gene eQTMs
ENSG00000164039	cg07902059	BDH2	chr4	-5.51777	1.32082	0.0335835	0.0433482	14390	Negative	protein_coding	-590653	Distal non-target gene eQTMs
ENSG00000149201	cg08370040	CCDC81	chr11	-0.408628	0.0772646	0.00052105	0.00083889	156346	Negative	protein_coding	-590468	Distal non-target gene eQTMs
ENSG00000131626	cg01460619	PPFIA1	chr11	-14.3323	2.19098	2.03e-05	3.77e-05	631815	Negative	protein_coding	-589988	Distal non-target gene eQTMs
ENSG00000140488	cg19921746	CELF6	chr15	-8.45275	0.77977	3.83e-15	1.79e-14	-844112	Negative	protein_coding	-587376	Distal non-target gene eQTMs
ENSG00000114316	cg10546523	USP4	chr3	13.1263	0.857892	8.96e-25	1.14e-23	995222	Positive	protein_coding	-583554	Distal non-target gene eQTMs
ENSG00000160685	cg11750116	ZBTB7B	chr1	8.61483	0.544307	2.81e-25	3.76e-24	-82336	Positive	protein_coding	-582853	Distal non-target gene eQTMs
ENSG00000179085	cg11750116	DPM3	chr1	2.06653	0.140908	1.77e-23	1.95e-22	-54925	Positive	protein_coding	-582853	Distal non-target gene eQTMs
ENSG00000116521	cg11750116	SCAMP3	chr1	4.50788	0.345387	5.21e-21	4.36e-20	-171013	Negative	protein_coding	-582853	Distal non-target gene eQTMs
ENSG00000160767	cg11750116	FAM189B	chr1	3.18418	0.227128	1.64e-20	1.31e-19	-162239	Positive	protein_coding	-582853	Distal non-target gene eQTMs
ENSG00000116584	cg11750116	ARHGEF2	chr1	9.29535	0.661122	1.86e-19	1.33e-18	-861885	Positive	protein_coding	-582853	Distal non-target gene eQTMs
ENSG00000143622	cg11750116	RIT1	chr1	-5.52307	0.410404	4.91e-19	3.37e-18	-812842	Positive	protein_coding	-582853	Distal non-target gene eQTMs
ENSG00000160753	cg11750116	RUSC1	chr1	7.43019	0.638853	9.23e-15	4.15e-14	235928	Positive	protein_coding	-582853	Distal non-target gene eQTMs
ENSG00000163462	cg11750116	TRIM46	chr1	1.17999	0.136277	1.06e-09	2.96e-09	88821	Negative	protein_coding	-582853	Distal non-target gene eQTMs
ENSG00000085982	cg15235893	USP40	chr2	6.96198	1.38357	0.00280042	0.00415688	1022199	Negative	protein_coding	-580321	Distal non-target gene eQTMs
ENSG00000203761	cg13096820	MSTO2P	chr1	0.901296	0.142056	1.52e-05	2.86e-05	663708	Positive	unprocessed_pseudogene	-580008	Distal non-target gene eQTMs
ENSG00000112238	cg15885575	PRDM13	chr6	1.51906	0.259844	0.00023408	0.00039036	-493335	Positive	protein_coding	-578337	Distal non-target gene eQTMs
ENSG00000135373	cg16821694	EHF	chr11	-1.17769	0.27413	0.025321	0.0332326	792034	Negative	protein_coding	-572387	Distal non-target gene eQTMs
ENSG00000006459	cg01012242	KDM7A	chr7	-21.5133	2.20189	7.68e-11	2.37e-10	258532	Negative	protein_coding	-565500	Distal non-target gene eQTMs
ENSG00000260231	cg01012242	JHDM1D-AS1	chr7	-3.87198	0.536699	1.55e-06	3.21e-06	-166094	Negative	antisense	-565500	Distal non-target gene eQTMs
ENSG00000087495	cg16628372	PHACTR3	chr20	-4.29334	0.522312	4.87e-08	1.17e-07	173672	Negative	protein_coding	-564119	Distal non-target gene eQTMs
ENSG00000172164	cg16722078	SNTB1	chr8	-3.01142	0.729364	0.0341603	0.0440281	-115702	Negative	protein_coding	-564033	Distal non-target gene eQTMs
ENSG00000103876	cg18938709	FAH	chr15	-0.89162	0.191295	0.0108922	0.0150059	-815150	Negative	protein_coding	-563290	Distal non-target gene eQTMs
ENSG00000074416	cg18648031	MGLL	chr3	-15.4023	1.39553	1.92e-13	7.58e-13	922658	Negative	protein_coding	-560079	Distal non-target gene eQTMs
ENSG00000243679	cg10997065	RP11-274B21.3	chr7	3.63771	0.192222	5.21e-32	1.47e-30	444160	Positive	processed_pseudogene	-557629	Distal non-target gene eQTMs
ENSG00000230715	cg10997065	RP11-274B21.4	chr7	1.02902	0.0993357	8.73e-13	3.24e-12	443032	Positive	processed_pseudogene	-557629	Distal non-target gene eQTMs
ENSG00000106070	cg04053021	GRB10	chr7	-83.6574	6.79523	1.59e-16	8.49e-16	87506	Negative	protein_coding	-556240	Distal non-target gene eQTMs
ENSG00000131558	cg03385973	EXOC4	chr7	-24.5925	3.74191	6.35e-06	1.24e-05	-1733233	Positive	protein_coding	-553853	Distal non-target gene eQTMs
ENSG00000272168	cg10558740	CASC15	chr6	-6.0395	0.871576	2.79e-06	5.63e-06	-484324	Negative	lincRNA	-552916	Distal non-target gene eQTMs
ENSG00000277831	cg19716299	RP11-269C23.5	chr13	-0.341192	0.0527597	5.24e-06	1.03e-05	66242	Negative	lincRNA	-551807	Distal non-target gene eQTMs
ENSG00000260455	cg27656116	NBAT1	chr6	-0.668911	0.119776	0.00040869	0.00066593	14068	Negative	lincRNA	-551680	Distal non-target gene eQTMs
ENSG00000186205	cg05365199	MTARC1	chr1	-3.31772	0.722001	0.00412512	0.00599859	-644632	Positive	protein_coding	-551405	Distal non-target gene eQTMs
ENSG00000184990	cg13307975	SIVA1	chr14	-6.84174	1.28353	0.00080968	0.00127624	831651	Negative	protein_coding	-536104	Distal non-target gene eQTMs
ENSG00000228393	cg10509076	LINC01004	chr7	-0.55889	0.107127	0.00076523	0.00121031	-87305	Negative	antisense	-534354	Distal non-target gene eQTMs
ENSG00000172059	cg18374944	KLF11	chr2	1.78488	0.363091	0.00846024	0.011826	-611611	Positive	protein_coding	-533726	Distal non-target gene eQTMs
ENSG00000101158	cg17986444	NELFCD	chr20	-7.07817	1.19027	3.61e-05	6.54e-05	141518	Negative	protein_coding	-530251	Distal non-target gene eQTMs
ENSG00000170871	cg16334072	KIAA0232	chr4	-41.2064	4.95597	8.55e-09	2.19e-08	-938461	Negative	protein_coding	-527298	Distal non-target gene eQTMs
ENSG00000261873	cg05817667	RP11-515E23.1	chr17	-2.70127	0.597183	0.00406477	0.00591376	46429	Negative	protein_coding	-526135	Distal non-target gene eQTMs
ENSG00000162694	cg23379653	EXTL2	chr1	-5.00479	0.464046	1.05e-14	4.69e-14	-3488	Positive	protein_coding	-523859	Distal non-target gene eQTMs
ENSG00000270820	cg04758010	RP11-355B11.2	chr2	0.710673	0.0843237	4.44e-10	1.28e-09	-940990	Negative	antisense	-523454	Distal non-target gene eQTMs
ENSG00000257398	cg04379678	RP11-554D14.6	chr12	-2.2306	0.192911	1.21e-10	3.67e-10	-929649	Negative	lincRNA	-522176	Distal non-target gene eQTMs
ENSG00000169189	cg06431244	NSMCE1	chr16	-2.09347	0.369977	0.0003547	0.00058108	845169	Negative	protein_coding	-520030	Distal non-target gene eQTMs
ENSG00000261360	cg16690319	CTD-2165H16.4	chr5	-1.31791	0.298686	0.0127059	0.0173334	1543	Negative	antisense	-519649	Distal non-target gene eQTMs
ENSG00000142731	cg14617908	PLK4	chr4	-2.7685	0.498847	0.0001602	0.00027122	-928824	Negative	protein_coding	-516966	Distal non-target gene eQTMs
ENSG00000275778	cg05406791	PRH1-PRR4	chr12	1.0216	0.0826091	1.46e-18	9.58e-18	-122574	Positive	protein_coding	-510817	Distal non-target gene eQTMs
ENSG00000110887	cg15005962	DAO	chr12	8.91864	1.10498	2.29e-08	5.64e-08	-210652	Positive	protein_coding	-508184	Distal non-target gene eQTMs
ENSG00000110436	cg24190415	SLC1A2	chr11	117.178	17.7911	4.4e-06	8.71e-06	168260	Positive	protein_coding	-503636	Distal non-target gene eQTMs
ENSG00000179431	cg23501962	FJX1	chr11	0.870563	0.0835489	5.81e-13	2.2e-12	199714	Positive	protein_coding	-502876	Distal non-target gene eQTMs
ENSG00000106153	cg27436579	CHCHD2	chr7	-14.954	1.36057	1.81e-15	8.72e-15	-27064	Negative	protein_coding	-501521	Distal non-target gene eQTMs
ENSG00000137868	cg03107161	STRA6	chr15	-2.2694	0.385898	0.00184229	0.00279306	-895698	Negative	protein_coding	-500933	Distal non-target gene eQTMs
ENSG00000112667	cg15123562	DNPH1	chr6	-1.77067	0.144296	2.52e-16	1.32e-15	851141	Negative	protein_coding	-500695	Distal non-target gene eQTMs
ENSG00000172888	cg27319280	ZNF621	chr3	-3.6788	0.406599	1.87e-10	5.56e-10	215302	Positive	protein_coding	-500662	Distal non-target gene eQTMs
ENSG00000136819	cg18327994	C9orf78	chr9	5.43573	0.580372	2.74e-11	8.81e-11	-216864	Positive	protein_coding	-499476	Distal non-target gene eQTMs
ENSG00000235363	cg09085216	SNRPGP10	chr1	-0.38267	0.0239863	7.94e-24	9.09e-23	991294	Positive	processed_pseudogene	-498350	Distal non-target gene eQTMs
ENSG00000133069	cg09085216	TMCC2	chr1	18.5831	1.53528	3.28e-17	1.87e-16	867993	Negative	protein_coding	-498350	Distal non-target gene eQTMs
ENSG00000214237	cg00172020	RP11-166N6.1	chr3	0.715706	0.137143	0.00074875	0.00118509	-324358	Positive	transcribed_unprocessed_pseudogene	-495899	Distal non-target gene eQTMs
ENSG00000164331	cg22963930	ANKRA2	chr5	-2.74057	0.250961	2.7e-15	1.28e-14	-736268	Negative	protein_coding	-495555	Distal non-target gene eQTMs
ENSG00000166797	cg01176271	FAM96A	chr15	3.77778	0.262043	9.39e-23	9.54e-22	23495	Negative	protein_coding	-494471	Distal non-target gene eQTMs
ENSG00000028528	cg01176271	SNX1	chr15	12.3649	0.959977	2.91e-19	2.05e-18	-1937	Positive	protein_coding	-494471	Distal non-target gene eQTMs
ENSG00000169118	cg01176271	CSNK1G1	chr15	9.43563	0.805513	9.19e-17	5.03e-16	-69465	Positive	protein_coding	-494471	Distal non-target gene eQTMs
ENSG00000185088	cg01176271	RPS27L	chr15	5.46426	0.454744	1.91e-16	1.01e-15	970188	Negative	protein_coding	-494471	Distal non-target gene eQTMs
ENSG00000103642	cg01176271	LACTB	chr15	1.25786	0.119441	2.53e-13	9.92e-13	-974227	Negative	protein_coding	-494471	Distal non-target gene eQTMs
ENSG00000132676	cg18613283	DAP3	chr1	17.4419	1.09647	5.7e-24	6.69e-23	636777	Positive	protein_coding	-492155	Distal non-target gene eQTMs
ENSG00000173614	cg05655022	NMNAT1	chr1	1.2271	0.162429	5.78e-08	1.37e-07	-1021010	Positive	protein_coding	-492150	Distal non-target gene eQTMs
ENSG00000155115	cg14866740	GTF3C6	chr6	-5.92509	0.682581	1.29e-08	3.26e-08	778282	Negative	protein_coding	-489207	Distal non-target gene eQTMs
ENSG00000112290	cg22970629	WASF1	chr6	-5.49754	0.688364	1.49e-09	4.11e-09	80348	Negative	protein_coding	-488950	Distal non-target gene eQTMs
ENSG00000165632	cg10588818	TAF3	chr10	3.161	0.234367	3.81e-21	3.23e-20	409637	Negative	protein_coding	-488396	Distal non-target gene eQTMs
ENSG00000280670	cg11803389	CCDC163P	chr1	-5.612	0.737767	7.58e-08	1.78e-07	5482	Negative	protein_coding	-488019	Distal non-target gene eQTMs
ENSG00000140350	cg01906442	ANP32A	chr15	85.9284	8.53777	8.59e-14	3.51e-13	635949	Positive	protein_coding	-483959	Distal non-target gene eQTMs
ENSG00000138604	cg05749577	GLCE	chr15	16.0989	2.1825	5.29e-07	1.15e-06	-253787	Positive	protein_coding	-483846	Distal non-target gene eQTMs
ENSG00000204178	cg11240755	TMEM57	chr1	-2.76088	0.477808	0.00089742	0.00140673	-389999	Negative	protein_coding	-482644	Distal non-target gene eQTMs
ENSG00000100364	cg12196504	KIAA0930	chr22	-6.88854	0.738132	6.91e-09	1.79e-08	791579	Negative	protein_coding	-479679	Distal non-target gene eQTMs
ENSG00000143157	cg22788606	POGK	chr1	-10.2985	1.34773	2.37e-08	5.83e-08	-615510	Positive	protein_coding	-479475	Distal non-target gene eQTMs
ENSG00000140470	cg02357637	ADAMTS17	chr15	-1.5183	0.193256	4.1e-08	9.89e-08	-242667	Negative	protein_coding	-477408	Distal non-target gene eQTMs
ENSG00000198393	cg15473325	ZNF26	chr12	3.75121	0.447024	8.07e-08	1.89e-07	425864	Positive	protein_coding	-476218	Distal non-target gene eQTMs
ENSG00000184983	cg06839820	NDUFA6	chr22	17.8621	1.96791	2.13e-10	6.31e-10	1003630	Positive	protein_coding	-474193	Distal non-target gene eQTMs
ENSG00000122711	cg01873040	SPINK4	chr9	-4.06632	0.475132	3.15e-10	9.19e-10	193540	Negative	protein_coding	-472272	Distal non-target gene eQTMs
ENSG00000122728	cg01873040	TAF1L	chr9	-2.10659	0.278984	9.37e-08	2.18e-07	395371	Negative	protein_coding	-472272	Distal non-target gene eQTMs
ENSG00000088766	cg14137001	CRLS1	chr20	8.59724	1.44991	4.25e-05	7.64e-05	906474	Positive	protein_coding	-469397	Distal non-target gene eQTMs
ENSG00000100422	cg14400292	CERK	chr22	25.9778	4.20933	1.4e-05	2.64e-05	-713087	Positive	protein_coding	-469085	Distal non-target gene eQTMs
ENSG00000105738	cg11787367	SIPA1L3	chr19	-44.6388	2.15018	7.66e-34	2.83e-32	-467570	Negative	protein_coding	-468101	Distal non-target gene eQTMs
ENSG00000104835	cg11787367	SARS2	chr19	-3.8984	0.48149	3.65e-09	9.71e-09	-540488	Negative	protein_coding	-468101	Distal non-target gene eQTMs
ENSG00000113272	cg05189291	THG1L	chr5	1.23901	0.204182	1.7e-05	3.18e-05	-29	Positive	protein_coding	-465370	Distal non-target gene eQTMs
ENSG00000143774	cg24610866	GUK1	chr1	107.732	15.4458	4.26e-07	9.33e-07	193240	Positive	protein_coding	-464469	Distal non-target gene eQTMs
ENSG00000251022	cg17434943	THAP9-AS1	chr4	-13.1388	1.15756	1.98e-16	1.05e-15	-1172	Negative	antisense	-461429	Distal non-target gene eQTMs
ENSG00000043514	cg11016786	TRIT1	chr1	-7.50627	0.709572	3.75e-13	1.44e-12	-296149	Negative	protein_coding	-460645	Distal non-target gene eQTMs
ENSG00000205517	cg20175418	RGL3	chr19	-3.85437	0.431115	2.48e-09	6.69e-09	-988134	Positive	protein_coding	-459655	Distal non-target gene eQTMs
ENSG00000187266	cg20175418	EPOR	chr19	-3.994	0.502705	5.76e-06	1.13e-05	-981000	Negative	protein_coding	-459655	Distal non-target gene eQTMs
ENSG00000142794	cg07384903	NBPF3	chr1	3.33865	0.4005	8.48e-10	2.39e-09	263029	Positive	protein_coding	-459082	Distal non-target gene eQTMs
ENSG00000147854	cg26899142	UHRF2	chr9	-24.866	1.69584	1.3e-24	1.62e-23	970552	Positive	protein_coding	-458209	Distal non-target gene eQTMs
ENSG00000244039	cg08400120	RP11-379K17.2	chr3	-6.92346	0.644927	8.94e-16	4.45e-15	-291053	Positive	processed_pseudogene	-457991	Distal non-target gene eQTMs
ENSG00000162928	cg12345955	PEX13	chr2	-5.52373	1.38183	0.0390151	0.0498865	462814	Negative	protein_coding	-454211	Distal non-target gene eQTMs
ENSG00000267520	cg22197434	RP11-373L24.1	chr2	-4.01518	0.5718	3.01e-07	6.68e-07	371827	Negative	3prime_overlapping_ncRNA	-453882	Distal non-target gene eQTMs
ENSG00000115421	cg22197434	PAPOLG	chr2	-5.35863	0.907966	5.05e-05	9.01e-05	202171	Negative	protein_coding	-453882	Distal non-target gene eQTMs
ENSG00000260261	cg16263129	RP11-480A16.1	chr3	-2.40956	0.298173	4.03e-09	1.07e-08	-789633	Negative	lincRNA	-450968	Distal non-target gene eQTMs
ENSG00000257767	cg09578254	RP11-162P23.2	chr12	2.99395	0.247667	6.57e-15	3e-14	859286	Positive	protein_coding	-449056	Distal non-target gene eQTMs
ENSG00000180440	cg00199846	SERTM1	chr13	3.91699	0.672953	5.11e-05	9.11e-05	-145089	Positive	protein_coding	-448929	Distal non-target gene eQTMs
ENSG00000066651	cg27124015	TRMT11	chr6	-7.46542	0.701368	5.76e-14	2.39e-13	238988	Positive	protein_coding	-445413	Distal non-target gene eQTMs
ENSG00000146373	cg08786026	RNF217	chr6	-9.58927	1.07626	6.46e-11	2e-10	-784547	Negative	protein_coding	-445014	Distal non-target gene eQTMs
ENSG00000111911	cg08786026	HINT3	chr6	-4.43581	0.872078	0.00056521	0.0009061	209678	Positive	protein_coding	-445014	Distal non-target gene eQTMs
ENSG00000100372	cg21712678	SLC25A17	chr22	3.84817	0.471739	7.15e-09	1.85e-08	532067	Positive	protein_coding	-444620	Distal non-target gene eQTMs
ENSG00000263968	cg16538178	RN7SL381P	chr16	-0.372241	0.0407876	1.44e-09	3.97e-09	45399	Negative	misc_RNA	-444454	Distal non-target gene eQTMs
ENSG00000109929	cg16730369	SC5D	chr11	18.6405	1.38517	3.7e-21	3.15e-20	339815	Positive	protein_coding	-441107	Distal non-target gene eQTMs
ENSG00000092820	cg27131008	EZR	chr6	11.3067	1.16472	1.72e-10	5.13e-10	843757	Positive	protein_coding	-440101	Distal non-target gene eQTMs
ENSG00000133477	cg21771250	FAM83F	chr22	0.741235	0.157955	0.00933004	0.0129625	-15091	Positive	protein_coding	-439292	Distal non-target gene eQTMs
ENSG00000150672	cg24483618	DLG2	chr11	-16.1391	1.94962	2.11e-09	5.73e-09	2837156	Negative	protein_coding	-437067	Distal non-target gene eQTMs
ENSG00000137845	cg01897796	ADAM10	chr15	26.7613	3.64077	2.43e-07	5.44e-07	344895	Positive	protein_coding	-435838	Distal non-target gene eQTMs
ENSG00000223649	cg09355428	RP11-359E8.3	chr1	0.382802	0.0408059	2.26e-11	7.33e-11	-975802	Positive	lincRNA	-432504	Distal non-target gene eQTMs
ENSG00000100234	cg21527637	TIMP3	chr22	34.2277	7.60898	0.0305008	0.0395698	327121	Positive	protein_coding	-431548	Distal non-target gene eQTMs
ENSG00000233482	cg26829310	RP11-78O9.1	chr1	-0.933687	0.0953412	1.75e-12	6.3e-12	265623	Negative	antisense	-431357	Distal non-target gene eQTMs
ENSG00000100225	cg00410034	FBXO7	chr22	25.3848	2.26551	2.32e-14	1e-13	672	Positive	protein_coding	-430972	Distal non-target gene eQTMs
ENSG00000101745	cg07376838	ANKRD12	chr18	34.5017	4.85803	1.03e-06	2.17e-06	-1213	Positive	protein_coding	-429820	Distal non-target gene eQTMs
ENSG00000251503	cg09994936	APITD1-CORT	chr1	-0.763372	0.084644	3.96e-09	1.05e-08	-471817	Negative	protein_coding	-429631	Distal non-target gene eQTMs
ENSG00000047932	cg17071618	GOPC	chr6	14.6504	1.3718	2.23e-15	1.06e-14	-879032	Positive	protein_coding	-427064	Distal non-target gene eQTMs
ENSG00000153975	cg17071618	ZUFSP	chr6	2.90282	0.346723	6.13e-09	1.59e-08	45619	Positive	protein_coding	-427064	Distal non-target gene eQTMs
ENSG00000153989	cg17071618	NUS1	chr6	8.03297	1.5409	0.00041003	0.00066806	994232	Negative	protein_coding	-427064	Distal non-target gene eQTMs
ENSG00000178425	cg17071618	NT5DC1	chr6	7.07574	1.57592	0.00443087	0.00642294	-580386	Positive	protein_coding	-427064	Distal non-target gene eQTMs
ENSG00000111834	cg26776742	RSPH4A	chr6	3.62624	0.661059	0.00011239	0.00019343	-64718	Positive	protein_coding	-427024	Distal non-target gene eQTMs
ENSG00000250132	cg07916784	RP11-359B12.2	chr12	-0.816785	0.121318	1.27e-06	2.65e-06	109274	Negative	antisense	-419628	Distal non-target gene eQTMs
ENSG00000213178	cg25314364	RP11-641D5.1	chr3	28.7175	0.84338	2.38e-55	2.32e-52	698123	Negative	processed_pseudogene	-416734	Distal non-target gene eQTMs
ENSG00000121671	cg16306508	CRY2	chr11	24.3615	3.87153	0.00013902	0.00023683	75739	Positive	protein_coding	-416008	Distal non-target gene eQTMs
ENSG00000100997	cg08726071	ABHD12	chr20	-10.7243	0.819755	2.6e-20	2.04e-19	112908	Negative	protein_coding	-414672	Distal non-target gene eQTMs
ENSG00000100994	cg08726071	PYGB	chr20	-40.6924	3.24042	5.66e-20	4.29e-19	-159566	Negative	protein_coding	-414672	Distal non-target gene eQTMs
ENSG00000175170	cg24001719	FAM182B	chr20	-1.95869	0.119901	1.24e-26	1.95e-25	-354742	Negative	protein_coding	-414663	Distal non-target gene eQTMs
ENSG00000197586	cg24001719	ENTPD6	chr20	-7.751	1.01243	2.79e-08	6.82e-08	-211949	Positive	protein_coding	-414663	Distal non-target gene eQTMs
ENSG00000103528	cg08438288	SYT17	chr16	-1.12004	0.183491	3.74e-05	6.77e-05	-333174	Negative	protein_coding	-414289	Distal non-target gene eQTMs
ENSG00000107295	cg23003138	SH3GL2	chr9	-14.3881	1.48731	4.82e-14	2.02e-13	115988	Positive	protein_coding	-414159	Distal non-target gene eQTMs
ENSG00000166965	cg14940396	RCCD1	chr15	2.89671	0.48158	3.67e-05	6.65e-05	850360	Positive	protein_coding	-413713	Distal non-target gene eQTMs
ENSG00000162456	cg21402272	KNCN	chr1	-0.245258	0.0433232	0.00037783	0.00061718	-347047	Negative	protein_coding	-411610	Distal non-target gene eQTMs
ENSG00000149428	cg10598871	HYOU1	chr11	50.835	4.54497	4.54e-13	1.73e-12	290644	Negative	protein_coding	-409224	Distal non-target gene eQTMs
ENSG00000184232	cg08931196	OAF	chr11	27.0452	3.48985	0.00032242	0.00053017	876565	Positive	protein_coding	-408859	Distal non-target gene eQTMs
ENSG00000135341	cg03720838	MAP3K7	chr6	29.8575	2.32338	2.19e-20	1.73e-19	-693730	Positive	protein_coding	-407573	Distal non-target gene eQTMs
ENSG00000146276	cg08586014	GABRR1	chr6	15.3717	1.48315	1.26e-14	5.59e-14	642298	Positive	protein_coding	-407529	Distal non-target gene eQTMs
ENSG00000156973	cg00616369	PDE6D	chr2	12.4792	0.887384	1.97e-23	2.16e-22	-268048	Negative	protein_coding	-407521	Distal non-target gene eQTMs
ENSG00000147576	cg27458060	ADHFE1	chr8	-12.371	2.05605	2.85e-05	5.22e-05	3661	Negative	protein_coding	-407271	Distal non-target gene eQTMs
ENSG00000104205	cg24704908	SGK3	chr8	1.60747	0.16038	2.63e-12	9.31e-12	-822873	Positive	protein_coding	-406642	Distal non-target gene eQTMs
ENSG00000010219	cg01093885	DYRK4	chr12	-3.53223	0.335032	1.57e-14	6.91e-14	285249	Negative	protein_coding	-405221	Distal non-target gene eQTMs
ENSG00000177058	cg21173440	SLC38A9	chr5	6.27303	0.687747	2.04e-11	6.65e-11	86539	Negative	protein_coding	-404624	Distal non-target gene eQTMs
ENSG00000116679	cg00816620	IVNS1ABP	chr1	-20.8373	1.18023	7.82e-32	2.16e-30	-138019	Positive	protein_coding	-403456	Distal non-target gene eQTMs
ENSG00000116668	cg00816620	SWT1	chr1	-2.53905	0.241538	7.78e-13	2.91e-12	-1289	Negative	protein_coding	-403456	Distal non-target gene eQTMs
ENSG00000111247	cg08949711	RAD51AP1	chr12	-1.51488	0.140179	6.55e-14	2.71e-13	265181	Negative	protein_coding	-401883	Distal non-target gene eQTMs
ENSG00000011105	cg08949711	TSPAN9	chr12	21.5961	2.03108	7.32e-13	2.74e-12	-1196262	Positive	protein_coding	-401883	Distal non-target gene eQTMs
ENSG00000116729	cg05450267	WLS	chr1	-59.508	5.76415	5.03e-14	2.11e-13	134210	Positive	protein_coding	-400380	Distal non-target gene eQTMs
ENSG00000134146	cg16108253	DPH6	chr15	2.70676	0.310416	9.48e-11	2.89e-10	-849859	Negative	protein_coding	-398766	Distal non-target gene eQTMs
ENSG00000172380	cg20611882	GNG12	chr1	-4.77474	0.738945	3.92e-06	7.79e-06	529551	Negative	protein_coding	-398723	Distal non-target gene eQTMs
ENSG00000272288	cg12615398	RP11-140K17.3	chr6	-0.236894	0.0352814	2.11e-06	4.31e-06	550788	Negative	antisense	-398624	Distal non-target gene eQTMs
ENSG00000101004	cg19434221	NINL	chr20	-3.37739	0.578325	4.28e-05	7.69e-05	-61511	Negative	protein_coding	-398207	Distal non-target gene eQTMs
ENSG00000167491	cg10573763	GATAD2A	chr19	-42.4361	1.82037	7.76e-40	6.26e-38	466541	Positive	protein_coding	-397158	Distal non-target gene eQTMs
ENSG00000105726	cg10573763	ATP13A1	chr19	-28.6806	1.85605	1.13e-25	1.6e-24	-725913	Negative	protein_coding	-397158	Distal non-target gene eQTMs
ENSG00000105676	cg10573763	ARMC6	chr19	-11.6385	0.855238	4.54e-20	3.47e-19	114290	Positive	protein_coding	-397158	Distal non-target gene eQTMs
ENSG00000064545	cg10573763	TMEM161A	chr19	-4.626	0.366656	5.22e-18	3.24e-17	-199884	Negative	protein_coding	-397158	Distal non-target gene eQTMs
ENSG00000064490	cg10573763	RFXANK	chr19	-7.34997	0.620298	3.63e-17	2.06e-16	272944	Positive	protein_coding	-397158	Distal non-target gene eQTMs
ENSG00000267629	cg10573763	AC138430.4	chr19	1.98315	0.169378	4.85e-16	2.47e-15	-335463	Positive	processed_transcript	-397158	Distal non-target gene eQTMs
ENSG00000254858	cg10573763	MPV17L2	chr19	-3.73042	0.3764	2.19e-12	7.82e-12	-726103	Negative	protein_coding	-397158	Distal non-target gene eQTMs
ENSG00000184635	cg10573763	ZNF93	chr19	1.91603	0.278154	7.29e-07	1.56e-06	981628	Positive	protein_coding	-397158	Distal non-target gene eQTMs
ENSG00000164825	cg11380909	DEFB1	chr8	-0.242948	0.0333602	2.3e-08	5.66e-08	-69781	Negative	protein_coding	-394219	Distal non-target gene eQTMs
ENSG00000213700	cg25944620	RPL17P50	chr10	0.236151	0.0420258	0.00022647	0.0003781	635724	Positive	processed_pseudogene	-394197	Distal non-target gene eQTMs
ENSG00000132635	cg25220249	PCED1A	chr20	7.84805	0.898965	4.94e-11	1.55e-10	-662728	Positive	protein_coding	-392591	Distal non-target gene eQTMs
ENSG00000134247	cg24833425	PTGFRN	chr1	7.15575	0.664081	2.62e-14	1.13e-13	-149952	Positive	protein_coding	-392113	Distal non-target gene eQTMs
ENSG00000278238	cg22135109	RP11-245D16.4	chr13	0.390101	0.0514102	1.14e-07	2.63e-07	-260371	Positive	lincRNA	-390566	Distal non-target gene eQTMs
ENSG00000117616	cg08972581	RSRP1	chr1	-18.4839	2.32903	4.62e-08	1.11e-07	577138	Negative	protein_coding	-389195	Distal non-target gene eQTMs
ENSG00000162415	cg05978555	ZSWIM5	chr1	10.7039	0.88513	6.78e-18	4.18e-17	1158681	Negative	protein_coding	-388093	Distal non-target gene eQTMs
ENSG00000104231	cg26463930	ZFAND1	chr8	-5.02276	0.427365	5.32e-17	2.97e-16	-59718	Negative	protein_coding	-386746	Distal non-target gene eQTMs
ENSG00000248932	cg11413581	RP11-319G6.1	chr3	4.12506	0.144172	6.81e-50	2.92e-47	60193	Negative	antisense	-385548	Distal non-target gene eQTMs
ENSG00000250543	cg11413581	RP11-442N1.1	chr3	-9.18997	0.773229	3.18e-17	1.82e-16	-358835	Negative	lincRNA	-385548	Distal non-target gene eQTMs
ENSG00000006715	cg02351181	VPS41	chr7	-9.39798	1.02382	2.65e-11	8.53e-11	-889199	Positive	protein_coding	-384526	Distal non-target gene eQTMs
ENSG00000183066	cg16195245	WBP2NL	chr22	1.67557	0.258091	9.09e-06	1.75e-05	757375	Positive	protein_coding	-384273	Distal non-target gene eQTMs
ENSG00000142657	cg10882692	PGD	chr1	23.4401	4.01965	0.00017645	0.00029767	72261	Positive	protein_coding	-382903	Distal non-target gene eQTMs
ENSG00000235263	cg10882692	RP13-392I16.1	chr1	2.74563	0.576427	0.00841476	0.0117681	825239	Negative	lincRNA	-382903	Distal non-target gene eQTMs
ENSG00000054965	cg18065752	FAM168A	chr11	70.2782	6.98838	2.47e-13	9.69e-13	-224147	Positive	protein_coding	-382741	Distal non-target gene eQTMs
ENSG00000124224	cg16473762	PPP4R1L	chr20	-6.68104	0.474492	4.35e-20	3.33e-19	993324	Negative	transcribed_unprocessed_pseudogene	-382546	Distal non-target gene eQTMs
ENSG00000120539	cg14240646	MASTL	chr10	-0.449743	0.0807786	0.00015048	0.0002553	-88492	Negative	protein_coding	-382229	Distal non-target gene eQTMs
ENSG00000164244	cg16752652	PRRC1	chr5	4.73879	0.500677	1.26e-12	4.61e-12	-566918	Positive	protein_coding	-381138	Distal non-target gene eQTMs
ENSG00000064651	cg16752652	SLC12A2	chr5	13.635	1.96249	4.13e-06	8.2e-06	-761	Negative	protein_coding	-381138	Distal non-target gene eQTMs
ENSG00000123104	cg11853986	ITPR2	chr12	65.1408	9.21488	1.89e-07	4.28e-07	-949089	Positive	protein_coding	-379860	Distal non-target gene eQTMs
ENSG00000105967	cg07440147	TFEC	chr7	-0.408234	0.0653842	5.37e-05	9.55e-05	653704	Positive	protein_coding	-378359	Distal non-target gene eQTMs
ENSG00000276148	cg08802990	RP11-278C7.4	chr12	-0.176523	0.0389861	0.00330379	0.00486096	-617806	Negative	antisense	-378268	Distal non-target gene eQTMs
ENSG00000169567	cg10873858	HINT1	chr5	-16.2873	0.783126	1.26e-38	8.82e-37	852625	Positive	protein_coding	-376416	Distal non-target gene eQTMs
ENSG00000155329	cg19780254	ZCCHC10	chr5	-4.49449	0.501099	2.31e-10	6.82e-10	-985336	Negative	protein_coding	-376413	Distal non-target gene eQTMs
ENSG00000131437	cg19780254	KIF3A	chr5	-16.321	3.85251	0.0240557	0.0316404	-680979	Negative	protein_coding	-376413	Distal non-target gene eQTMs
ENSG00000184897	cg11882307	H1FX	chr3	-39.9948	2.93329	2.52e-10	7.41e-10	-65217	Negative	protein_coding	-369958	Distal non-target gene eQTMs
ENSG00000206417	cg11882307	H1FX-AS1	chr3	-0.437155	0.0481214	5.66e-10	1.61e-09	65838	Negative	antisense	-369958	Distal non-target gene eQTMs
ENSG00000004399	cg11882307	PLXND1	chr3	-8.22646	1.08249	1.31e-07	3.01e-07	-305621	Negative	protein_coding	-369958	Distal non-target gene eQTMs
ENSG00000111305	cg12749787	GSG1	chr12	9.55464	1.75557	0.00024922	0.00041446	-358087	Positive	protein_coding	-368366	Distal non-target gene eQTMs
ENSG00000174483	cg19248367	BBS1	chr11	9.89644	1.68522	0.00018789	0.000316	-863002	Positive	protein_coding	-366830	Distal non-target gene eQTMs
ENSG00000135093	cg18198707	USP30	chr12	10.0715	1.30607	4.81e-08	1.15e-07	-75104	Positive	protein_coding	-366597	Distal non-target gene eQTMs
ENSG00000130363	cg03544657	RSPH3	chr6	5.98081	1.28959	0.00938374	0.013034	-906339	Positive	protein_coding	-366145	Distal non-target gene eQTMs
ENSG00000075856	cg05434977	SART3	chr12	5.69733	0.812822	6.22e-07	1.34e-06	575260	Positive	protein_coding	-365878	Distal non-target gene eQTMs
ENSG00000182580	cg09435025	EPHB3	chr3	-1.28521	0.103891	3.05e-17	1.75e-16	312176	Negative	protein_coding	-364676	Distal non-target gene eQTMs
ENSG00000162753	cg20940459	SLC9C2	chr1	0.888608	0.140296	2.3e-05	4.24e-05	324324	Positive	protein_coding	-363422	Distal non-target gene eQTMs
ENSG00000234741	cg21384371	GAS5	chr1	-9.20805	0.533737	3.17e-30	7.35e-29	-34167	Negative	processed_transcript	-363030	Distal non-target gene eQTMs
ENSG00000076321	cg21384371	KLHL20	chr1	-2.7966	0.303856	2.36e-12	8.39e-12	-109451	Negative	protein_coding	-363030	Distal non-target gene eQTMs
ENSG00000228175	cg16695835	GEMIN8P4	chr1	0.683195	0.154517	0.00886569	0.0123545	1734	Positive	processed_pseudogene	-362187	Distal non-target gene eQTMs
ENSG00000072310	cg19479919	SREBF1	chr17	-35.2961	3.15916	5.23e-10	1.49e-09	228542	Negative	protein_coding	-361253	Distal non-target gene eQTMs
ENSG00000131899	cg12408299	LLGL1	chr17	9.56674	0.488622	2.99e-34	1.18e-32	186929	Positive	protein_coding	-361018	Distal non-target gene eQTMs
ENSG00000175662	cg12408299	TOM1L2	chr17	36.1278	3.9131	2.28e-11	7.39e-11	195195	Positive	protein_coding	-361018	Distal non-target gene eQTMs
ENSG00000273018	cg12408299	CTD-2303H24.2	chr17	-14.8824	1.97704	1.67e-06	3.45e-06	-472515	Negative	processed_transcript	-361018	Distal non-target gene eQTMs
ENSG00000148835	cg17567560	TAF5	chr10	3.1959	0.381674	5.71e-08	1.36e-07	90870	Positive	protein_coding	-358813	Distal non-target gene eQTMs
ENSG00000170579	cg17698332	DLGAP1	chr18	-7.55951	1.10453	2.13e-06	4.35e-06	143495	Negative	protein_coding	-355382	Distal non-target gene eQTMs
ENSG00000140153	cg08593712	WDR20	chr14	9.85499	0.929808	1.35e-13	5.4e-13	-180112	Negative	protein_coding	-355087	Distal non-target gene eQTMs
ENSG00000111716	cg23938283	LDHB	chr12	-35.3015	3.27001	4.94e-15	2.28e-14	-465260	Negative	protein_coding	-354408	Distal non-target gene eQTMs
ENSG00000129562	cg11415937	DAD1	chr14	-5.96622	0.430324	1.44e-21	1.28e-20	-7800	Positive	protein_coding	-354014	Distal non-target gene eQTMs
ENSG00000179933	cg11415937	C14orf119	chr14	-4.63214	0.323182	3.76e-20	2.9e-19	538398	Negative	protein_coding	-354014	Distal non-target gene eQTMs
ENSG00000158815	cg21658235	FGF17	chr8	-3.72755	0.421286	3.68e-10	1.07e-09	-556480	Negative	protein_coding	-353835	Distal non-target gene eQTMs
ENSG00000261840	cg05826330	RP11-146F11.1	chr16	-1.30708	0.126373	5.81e-11	1.81e-10	761925	Negative	antisense	-353525	Distal non-target gene eQTMs
ENSG00000099377	cg04349810	HSD3B7	chr16	-1.23307	0.15222	4.4e-08	1.06e-07	-473544	Negative	protein_coding	-352644	Distal non-target gene eQTMs
ENSG00000139726	cg22007326	DENR	chr12	10.1251	1.95299	0.00448928	0.00650285	-832278	Positive	protein_coding	-352186	Distal non-target gene eQTMs
ENSG00000234595	cg04531425	AC013733.3	chr2	-2.55217	0.421329	0.00882522	0.012302	224999	Negative	antisense	-352146	Distal non-target gene eQTMs
ENSG00000129484	cg01114249	PARP2	chr14	-10.3839	1.08816	2.22e-11	7.21e-11	-339895	Negative	protein_coding	-350165	Distal non-target gene eQTMs
ENSG00000135637	cg19885631	CCDC142	chr2	1.99829	0.219026	2.68e-11	8.62e-11	-292958	Positive	protein_coding	-350112	Distal non-target gene eQTMs
ENSG00000115325	cg20340806	DOK1	chr2	-2.53296	0.218088	4.34e-15	2.02e-14	370207	Negative	protein_coding	-349903	Distal non-target gene eQTMs
ENSG00000163013	cg20340806	FBXO41	chr2	-10.8694	1.0386	5.78e-14	2.4e-13	924137	Negative	protein_coding	-349903	Distal non-target gene eQTMs
ENSG00000270571	cg20340806	RP11-355F16.1	chr2	0.643075	0.0962467	2.71e-06	5.48e-06	975547	Positive	antisense	-349903	Distal non-target gene eQTMs
ENSG00000274049	cg08434152	INO80B-WBP1	chr2	-10.559	1.00808	2.38e-13	9.35e-13	276445	Positive	protein_coding	-349727	Distal non-target gene eQTMs
ENSG00000144034	cg08434152	TPRKB	chr2	4.57073	0.443844	1.54e-12	5.58e-12	449539	Positive	protein_coding	-349727	Distal non-target gene eQTMs
ENSG00000080845	cg19837275	DLGAP4	chr20	32.0717	1.67787	5.12e-30	1.15e-28	-1221636	Positive	protein_coding	-349562	Distal non-target gene eQTMs
ENSG00000170471	cg19837275	RALGAPB	chr20	-23.203	1.71145	3.63e-21	3.1e-20	944844	Negative	protein_coding	-349562	Distal non-target gene eQTMs
ENSG00000068305	cg08029449	MEF2A	chr15	-11.7915	2.51386	0.00658228	0.00932932	671783	Negative	protein_coding	-345906	Distal non-target gene eQTMs
ENSG00000137992	cg03050965	DBT	chr1	2.50036	0.551184	0.00849091	0.0118632	1052762	Positive	protein_coding	-343605	Distal non-target gene eQTMs
ENSG00000197299	cg10698959	BLM	chr15	-5.71705	0.928759	0.00010264	0.00017757	-155484	Negative	protein_coding	-342905	Distal non-target gene eQTMs
ENSG00000162779	cg03732293	AXDND1	chr1	0.789795	0.143582	0.00021353	0.00035714	-232	Positive	protein_coding	-340148	Distal non-target gene eQTMs
ENSG00000164961	cg18455759	KIAA0196	chr8	-2.78532	0.536265	0.0034979	0.00513152	407265	Negative	protein_coding	-339846	Distal non-target gene eQTMs
ENSG00000198919	cg09277389	DZIP3	chr3	-19.3279	1.42066	1.62e-21	1.43e-20	366807	Negative	protein_coding	-339650	Distal non-target gene eQTMs
ENSG00000163507	cg09277389	KIAA1524	chr3	-2.17241	0.173649	1.28e-20	1.04e-19	-326966	Negative	protein_coding	-339650	Distal non-target gene eQTMs
ENSG00000138472	cg09277389	GUCA1C	chr3	-42.4698	3.37412	1.36e-20	1.1e-19	-684894	Positive	protein_coding	-339650	Distal non-target gene eQTMs
ENSG00000111276	cg06928346	CDKN1B	chr12	17.5844	1.99848	2.27e-10	6.7e-10	18896	Positive	protein_coding	-339083	Distal non-target gene eQTMs
ENSG00000266066	cg05363938	POLRMTP1	chr17	0.842836	0.158694	0.00049575	0.00079999	828739	Positive	processed_pseudogene	-338310	Distal non-target gene eQTMs
ENSG00000245149	cg02700454	RNF139-AS1	chr8	8.44592	0.569528	3.08e-24	3.71e-23	967270	Positive	lincRNA	-338076	Distal non-target gene eQTMs
ENSG00000107738	cg26059836	C10orf54	chr10	-7.32041	1.08722	0.00133644	0.00205458	-931707	Negative	protein_coding	-337028	Distal non-target gene eQTMs
ENSG00000170144	cg25844977	HNRNPA3	chr2	-72.0103	5.95553	1.52e-17	9e-17	-512291	Negative	protein_coding	-332157	Distal non-target gene eQTMs
ENSG00000270574	cg25844977	RP11-171I2.2	chr2	-0.22505	0.0322397	1.23e-07	2.83e-07	853936	Negative	antisense	-332157	Distal non-target gene eQTMs
ENSG00000117691	cg26883251	NENF	chr1	-3.89432	0.764845	0.00067727	0.00107573	-562784	Negative	protein_coding	-330270	Distal non-target gene eQTMs
ENSG00000169410	cg26644079	PTPN9	chr15	3.23933	0.411892	3.76e-07	8.26e-07	213597	Positive	protein_coding	-329893	Distal non-target gene eQTMs
ENSG00000200873	cg16820791	RNA5SP399	chr15	-1.46361	0.12731	1.66e-08	4.15e-08	-259564	Negative	rRNA	-325496	Distal non-target gene eQTMs
ENSG00000259781	cg15411268	RP11-673C5.1	chr15	-11.9974	0.458548	6.51e-48	1.91e-45	952035	Negative	processed_pseudogene	-324167	Distal non-target gene eQTMs
ENSG00000167315	cg27332188	ACAA2	chr18	-12.9107	1.22095	4.99e-13	1.9e-12	29177	Negative	protein_coding	-324089	Distal non-target gene eQTMs
ENSG00000272934	cg09371375	RP11-392E22.10	chr9	-0.430299	0.0790209	0.00018197	0.00030648	-150587	Negative	processed_transcript	-323115	Distal non-target gene eQTMs
ENSG00000172201	cg22626973	ID4	chr6	22.5285	2.02494	1.19e-14	5.29e-14	-697157	Positive	protein_coding	-322440	Distal non-target gene eQTMs
ENSG00000131067	cg11415288	GGT7	chr20	-24.509	4.93833	0.00147754	0.00226358	-328141	Negative	protein_coding	-322010	Distal non-target gene eQTMs
ENSG00000172936	cg14928452	MYD88	chr3	-1.79993	0.380161	0.00486004	0.00700929	365172	Negative	protein_coding	-321191	Distal non-target gene eQTMs
ENSG00000139438	cg18552940	FAM222A	chr12	-27.7494	3.51413	1.42e-06	2.95e-06	661647	Positive	protein_coding	-320985	Distal non-target gene eQTMs
ENSG00000275963	cg19116791	RP11-180M15.6	chr12	-0.316288	0.039639	5.12e-08	1.22e-07	-562225	Negative	lincRNA	-320382	Distal non-target gene eQTMs
ENSG00000163170	cg17053845	BOLA3	chr2	-1.53765	0.113554	6.75e-22	6.24e-21	12606	Negative	protein_coding	-319090	Distal non-target gene eQTMs
ENSG00000146352	cg19759300	CLVS2	chr6	10.204	2.51417	0.0112375	0.0154513	207139	Positive	protein_coding	-317179	Distal non-target gene eQTMs
ENSG00000150977	cg21453309	RILPL2	chr12	-1.34568	0.188154	4.04e-06	8.02e-06	878826	Negative	protein_coding	-316268	Distal non-target gene eQTMs
ENSG00000122299	cg06295404	ZC3H7A	chr16	-17.4504	1.3049	5.44e-20	4.14e-19	-494106	Negative	protein_coding	-314020	Distal non-target gene eQTMs
ENSG00000166669	cg06082432	ATF7IP2	chr16	-1.91752	0.163365	2.68e-17	1.55e-16	-929984	Negative	protein_coding	-313958	Distal non-target gene eQTMs
ENSG00000277369	cg26012103	RP11-486I11.2	chr16	0.792632	0.167861	0.00481578	0.00694774	541953	Negative	lincRNA	-313055	Distal non-target gene eQTMs
ENSG00000134020	cg24639902	PEBP4	chr8	5.55796	0.868864	0.00017489	0.00029515	204207	Positive	protein_coding	-312826	Distal non-target gene eQTMs
ENSG00000256028	cg13924477	RP11-197N18.2	chr12	-2.78298	0.482756	0.00026028	0.00043191	-609138	Negative	processed_transcript	-312124	Distal non-target gene eQTMs
ENSG00000143171	cg26823212	RXRG	chr1	-8.52584	1.9123	0.0118405	0.0162183	507148	Positive	protein_coding	-309607	Distal non-target gene eQTMs
ENSG00000170899	cg21989399	GSTA4	chr6	-9.57196	1.88433	0.00142388	0.00218346	-307016	Negative	protein_coding	-309511	Distal non-target gene eQTMs
ENSG00000204311	cg13667965	DFNB59	chr2	-0.5678	0.0897604	1.45e-05	2.73e-05	32005	Positive	protein_coding	-306917	Distal non-target gene eQTMs
ENSG00000180834	cg23166970	MAP6D1	chr3	-1.03612	0.162752	1.18e-05	2.24e-05	-716086	Negative	protein_coding	-306396	Distal non-target gene eQTMs
ENSG00000119242	cg25098479	CCDC92	chr12	-20.4722	1.2012	4.5e-27	7.43e-26	360594	Negative	protein_coding	-306013	Distal non-target gene eQTMs
ENSG00000179195	cg25098479	ZNF664	chr12	33.9483	3.47069	4.84e-12	1.67e-11	-307409	Positive	protein_coding	-306013	Distal non-target gene eQTMs
ENSG00000113319	cg08757742	RASGRF2	chr5	46.3883	7.06555	4.24e-06	8.41e-06	-189	Negative	protein_coding	-305904	Distal non-target gene eQTMs
ENSG00000174151	cg23405243	CYB561D1	chr1	3.78177	0.812575	0.00726403	0.0102419	-962301	Positive	protein_coding	-305867	Distal non-target gene eQTMs
ENSG00000275703	cg03410269	U47924.32	chr12	0.815119	0.124008	1.12e-05	2.14e-05	-69054	Positive	lincRNA	-305658	Distal non-target gene eQTMs
ENSG00000138944	cg09754851	KIAA1644	chr22	-6.58786	1.4617	0.00797262	0.0111791	60645	Negative	protein_coding	-305099	Distal non-target gene eQTMs
ENSG00000197879	cg10115858	MYO1C	chr17	-18.5869	1.64309	3.42e-15	1.61e-14	-749266	Negative	protein_coding	-304593	Distal non-target gene eQTMs
ENSG00000181031	cg10115858	RPH3AL	chr17	-8.80761	1.33193	0.00036144	0.00059147	502531	Negative	protein_coding	-304593	Distal non-target gene eQTMs
ENSG00000167703	cg12384639	SLC43A2	chr17	19.8929	1.11854	1.33e-27	2.32e-26	-854367	Positive	protein_coding	-304573	Distal non-target gene eQTMs
ENSG00000272636	cg06314225	DOC2B	chr17	-96.9848	19.4649	0.00266966	0.00397251	571953	Negative	protein_coding	-304415	Distal non-target gene eQTMs
ENSG00000092203	cg15713661	TOX4	chr14	-4.56456	0.737353	4.74e-05	8.48e-05	866733	Positive	protein_coding	-303870	Distal non-target gene eQTMs
ENSG00000279696	cg21138277	RP11-178H8.7	chr11	-1.19906	0.116683	3.12e-14	1.33e-13	-183225	Negative	TEC	-303296	Distal non-target gene eQTMs
ENSG00000020922	cg21138277	MRE11A	chr11	-4.25295	0.446965	1.24e-10	3.75e-10	-872149	Positive	protein_coding	-303296	Distal non-target gene eQTMs
ENSG00000177383	cg04832318	MAGEF1	chr3	9.29947	1.11992	3.47e-09	9.25e-09	875668	Positive	protein_coding	-303094	Distal non-target gene eQTMs
ENSG00000216775	cg04227237	RP1-152L7.5	chr6	-6.42158	1.33033	0.0021547	0.00324084	98	Negative	transcribed_unprocessed_pseudogene	-302847	Distal non-target gene eQTMs
ENSG00000143970	cg02313965	ASXL2	chr2	24.0815	3.21557	1.54e-07	3.52e-07	-940040	Positive	protein_coding	-301799	Distal non-target gene eQTMs
ENSG00000275835	cg14703666	TUBGCP5	chr15	-2.38043	0.402601	3.3e-05	6e-05	883914	Negative	protein_coding	-301428	Distal non-target gene eQTMs
ENSG00000088387	cg11782830	DOCK9	chr13	-21.9662	1.09774	3.92e-37	2.26e-35	708581	Negative	protein_coding	-301300	Distal non-target gene eQTMs
ENSG00000116329	cg06874758	OPRD1	chr1	0.795365	0.0984653	2.06e-08	5.1e-08	-370073	Positive	protein_coding	-300380	Distal non-target gene eQTMs
ENSG00000204138	cg10846285	PHACTR4	chr1	-5.58925	0.73479	8.06e-08	1.89e-07	-812494	Negative	protein_coding	-300241	Distal non-target gene eQTMs
ENSG00000180098	cg16996661	TRNAU1AP	chr1	-2.69844	0.23159	2.85e-16	1.48e-15	-628263	Negative	protein_coding	-299513	Distal non-target gene eQTMs
ENSG00000188283	cg01876934	ZNF383	chr19	-2.72049	0.67149	0.0363343	0.0466556	2442	Negative	protein_coding	-299193	Distal non-target gene eQTMs
ENSG00000172493	cg15847565	AFF1	chr4	128.642	11.6555	6.35e-16	3.2e-15	42748	Negative	protein_coding	-298123	Distal non-target gene eQTMs
ENSG00000069998	cg00748432	CECR5	chr22	-3.47716	0.698787	0.00191244	0.00289302	425511	Positive	protein_coding	-296289	Distal non-target gene eQTMs
ENSG00000229124	cg14136028	VIM-AS1	chr10	0.595337	0.0650777	1.89e-09	5.16e-09	211582	Positive	antisense	-295990	Distal non-target gene eQTMs
ENSG00000105185	cg25945090	PDCD5	chr19	10.3976	0.727363	1.44e-24	1.78e-23	-390924	Positive	protein_coding	-295517	Distal non-target gene eQTMs
ENSG00000168813	cg25945090	ZNF507	chr19	10.9158	1.04597	2.68e-14	1.15e-13	-626520	Positive	protein_coding	-295517	Distal non-target gene eQTMs
ENSG00000178904	cg25945090	DPY19L3	chr19	8.37192	1.37254	1.15e-05	2.19e-05	-566571	Positive	protein_coding	-295517	Distal non-target gene eQTMs
ENSG00000257135	cg03251967	RP11-320M2.1	chr2	0.603812	0.0367939	2.42e-24	2.94e-23	-684476	Positive	lincRNA	-295188	Distal non-target gene eQTMs
ENSG00000175538	cg09661809	KCNE3	chr11	9.89046	1.49416	2.13e-05	3.94e-05	787196	Negative	protein_coding	-292837	Distal non-target gene eQTMs
ENSG00000198356	cg02842104	ASNA1	chr19	5.45639	0.503507	8.24e-15	3.72e-14	596753	Positive	protein_coding	-291660	Distal non-target gene eQTMs
ENSG00000167815	cg02842104	PRDX2	chr19	23.1463	2.41001	3.39e-12	1.19e-11	-656434	Positive	protein_coding	-291660	Distal non-target gene eQTMs
ENSG00000196646	cg02842104	ZNF136	chr19	-1.76006	0.226067	6.04e-08	1.43e-07	22678	Positive	protein_coding	-291660	Distal non-target gene eQTMs
ENSG00000274810	cg01058342	NPHP3-ACAD11	chr3	-3.41635	0.211335	2.43e-27	4.11e-26	771320	Negative	protein_coding	-291071	Distal non-target gene eQTMs
ENSG00000148516	cg03467424	ZEB1	chr10	12.116	1.38636	3.32e-10	9.67e-10	-1028397	Positive	protein_coding	-290461	Distal non-target gene eQTMs
ENSG00000173715	cg04401197	C11orf80	chr11	4.19339	0.731595	0.00025568	0.00042473	742086	Positive	protein_coding	-290369	Distal non-target gene eQTMs
ENSG00000119185	cg00838663	ITGB1BP1	chr2	-8.12689	1.325	5.67e-05	0.00010066	1007082	Negative	protein_coding	-289823	Distal non-target gene eQTMs
ENSG00000227398	cg19642148	KIF9-AS1	chr3	-2.2	0.294276	2.76e-07	6.14e-07	-638990	Negative	antisense	-289415	Distal non-target gene eQTMs
ENSG00000225439	cg20090558	BOLA3-AS1	chr2	2.08552	0.238776	1.06e-09	2.96e-09	971962	Positive	antisense	-288685	Distal non-target gene eQTMs
ENSG00000244274	cg14307985	DBNDD2	chr20	-3.59271	0.440961	2.42e-08	5.95e-08	-1000593	Negative	protein_coding	-288378	Distal non-target gene eQTMs
ENSG00000128346	cg04794164	C22orf23	chr22	-0.557882	0.104491	0.00120548	0.00186336	-374327	Negative	protein_coding	-286696	Distal non-target gene eQTMs
ENSG00000148943	cg16201963	LIN7C	chr11	21.3385	1.82256	1.53e-16	8.19e-16	12041	Positive	protein_coding	-286346	Distal non-target gene eQTMs
ENSG00000092054	cg17776964	MYH7	chr14	0.602069	0.0505814	2.03e-12	7.26e-12	-923346	Positive	protein_coding	-286301	Distal non-target gene eQTMs
ENSG00000235194	cg06445317	PPP1R3E	chr14	-23.4488	2.332	1.21e-11	4.03e-11	-806411	Negative	protein_coding	-286139	Distal non-target gene eQTMs
ENSG00000002016	cg03494525	RAD52	chr12	3.44968	0.526176	1.15e-05	2.19e-05	37808	Positive	protein_coding	-286106	Distal non-target gene eQTMs
ENSG00000167987	cg26241240	VPS37C	chr11	-19.2446	3.29923	0.00042787	0.00069565	-4068	Negative	protein_coding	-283224	Distal non-target gene eQTMs
ENSG00000109771	cg10541887	LRP2BP	chr4	-19.0344	1.95275	1.62e-11	5.32e-11	-826357	Negative	protein_coding	-283013	Distal non-target gene eQTMs
ENSG00000185122	cg27449959	HSF1	chr8	-19.4767	1.08916	1.51e-28	2.92e-27	-507810	Negative	protein_coding	-281409	Distal non-target gene eQTMs
ENSG00000173137	cg27449959	ADCK5	chr8	-3.0878	0.187382	2.32e-25	3.14e-24	-426300	Negative	protein_coding	-281409	Distal non-target gene eQTMs
ENSG00000071894	cg27449959	CPSF1	chr8	-31.0653	2.5892	4.14e-17	2.34e-16	406172	Negative	protein_coding	-281409	Distal non-target gene eQTMs
ENSG00000179698	cg27449959	WDR97	chr8	-3.46795	0.291578	2.02e-15	9.68e-15	-691675	Negative	protein_coding	-281409	Distal non-target gene eQTMs
ENSG00000185000	cg27449959	DGAT1	chr8	-8.14992	0.753274	2.48e-14	1.07e-13	484817	Negative	protein_coding	-281409	Distal non-target gene eQTMs
ENSG00000197363	cg27449959	ZNF517	chr8	-2.15814	0.217189	1.23e-12	4.51e-12	-525	Negative	protein_coding	-281409	Distal non-target gene eQTMs
ENSG00000255182	cg27449959	CTD-2517M22.14	chr8	-0.990365	0.104426	1.17e-11	3.91e-11	303943	Negative	processed_transcript	-281409	Distal non-target gene eQTMs
ENSG00000182325	cg27449959	FBXL6	chr8	-2.72985	0.3034	1.17e-10	3.55e-10	443970	Negative	protein_coding	-281409	Distal non-target gene eQTMs
ENSG00000271698	cg27449959	GS1-393G12.13	chr8	-0.596241	0.076379	4.89e-08	1.17e-07	446173	Negative	protein_coding	-281409	Distal non-target gene eQTMs
ENSG00000213402	cg23149790	PTPRCAP	chr11	-1.83637	0.188277	2.39e-09	6.46e-09	-745360	Negative	protein_coding	-280992	Distal non-target gene eQTMs
ENSG00000145919	cg25131818	BOD1	chr5	-5.6272	0.417939	4.52e-18	2.81e-17	-34340	Negative	protein_coding	-280555	Distal non-target gene eQTMs
ENSG00000136319	cg09925855	TTC5	chr14	-2.41984	0.305463	8.94e-09	2.29e-08	357158	Negative	protein_coding	-280404	Distal non-target gene eQTMs
ENSG00000127334	cg26606397	DYRK2	chr12	36.8979	5.16713	1.11e-06	2.33e-06	-962545	Positive	protein_coding	-278502	Distal non-target gene eQTMs
ENSG00000168350	cg14282221	DEGS2	chr14	0.716945	0.0546149	2.77e-17	1.6e-16	510724	Negative	protein_coding	-278263	Distal non-target gene eQTMs
ENSG00000113552	cg02106466	GNPDA1	chr5	-5.36959	0.608296	1.28e-07	2.94e-07	-31537	Positive	protein_coding	-277991	Distal non-target gene eQTMs
ENSG00000260274	cg14827797	RP11-817O13.8	chr15	-0.285544	0.0535216	0.00087201	0.0013686	-256582	Negative	lincRNA	-277782	Distal non-target gene eQTMs
ENSG00000117450	cg27223543	PRDX1	chr1	-42.5857	2.89533	1.03e-23	1.17e-22	-878583	Negative	protein_coding	-277193	Distal non-target gene eQTMs
ENSG00000117408	cg13864586	IPO13	chr1	34.7514	3.33768	5.89e-14	2.45e-13	-685340	Negative	protein_coding	-277030	Distal non-target gene eQTMs
ENSG00000143479	cg12430618	DYRK3	chr1	2.75921	0.270865	1.17e-12	4.3e-12	-277085	Positive	protein_coding	-276999	Distal non-target gene eQTMs
ENSG00000158517	cg02773250	NCF1	chr7	0.319826	0.0561096	0.00048268	0.00077948	-988398	Positive	protein_coding	-276089	Distal non-target gene eQTMs
ENSG00000267519	cg04466266	MIR24-2	chr19	3.30589	0.53319	0.0223562	0.0295243	589370	Positive	lincRNA	-276071	Distal non-target gene eQTMs
ENSG00000101331	cg12003921	CCM2L	chr20	0.849924	0.0758242	2.45e-14	1.06e-13	-472972	Positive	protein_coding	-275631	Distal non-target gene eQTMs
ENSG00000136521	cg11628282	NDUFB5	chr3	24.8261	4.15778	3.98e-05	7.17e-05	256854	Positive	protein_coding	-275557	Distal non-target gene eQTMs
ENSG00000128268	cg26227661	MGAT3	chr22	-17.6684	1.22108	2.85e-22	2.76e-21	309329	Negative	protein_coding	-275369	Distal non-target gene eQTMs
ENSG00000168135	cg26227661	KCNJ4	chr22	-3.07659	0.230577	3.15e-18	2e-17	721356	Negative	protein_coding	-275369	Distal non-target gene eQTMs
ENSG00000125971	cg03912614	DYNLRB1	chr20	-10.0995	1.19602	5.18e-10	1.48e-09	-630539	Positive	protein_coding	-274088	Distal non-target gene eQTMs
ENSG00000263412	cg01384163	RP5-890E16.2	chr17	-0.457223	0.0406856	3.53e-16	1.82e-15	951466	Negative	processed_transcript	-274085	Distal non-target gene eQTMs
ENSG00000121073	cg01384163	SLC35B1	chr17	-3.61098	0.351972	2.1e-08	5.19e-08	-704327	Negative	protein_coding	-274085	Distal non-target gene eQTMs
ENSG00000260428	cg07296766	SCX	chr8	-1.39382	0.107195	2.51e-14	1.08e-13	-525489	Negative	protein_coding	-273950	Distal non-target gene eQTMs
ENSG00000110063	cg13169525	DCPS	chr11	9.31628	0.42519	1.25e-38	8.79e-37	91957	Negative	protein_coding	-273187	Distal non-target gene eQTMs
ENSG00000197798	cg02798749	FAM118B	chr11	3.06117	0.389589	4.47e-08	1.07e-07	-44	Positive	protein_coding	-272852	Distal non-target gene eQTMs
ENSG00000078967	cg24319545	UBE2D4	chr7	4.40599	0.645266	1.46e-06	3.03e-06	-921243	Positive	protein_coding	-272628	Distal non-target gene eQTMs
ENSG00000279483	cg12171402	AC090498.1	chr7	-50.2515	2.19792	8.63e-43	1.02e-40	59507	Negative	protein_coding	-272245	Distal non-target gene eQTMs
ENSG00000162745	cg10203578	OLFML2B	chr1	-0.79576	0.136175	0.00058036	0.00092937	55313	Negative	protein_coding	-272211	Distal non-target gene eQTMs
ENSG00000147654	cg25407888	EBAG9	chr8	-5.6379	1.08636	0.00043425	0.00070523	205437	Negative	protein_coding	-270857	Distal non-target gene eQTMs
ENSG00000183185	cg03520471	GABRR3	chr3	-23.5958	1.86009	9.86e-19	6.58e-18	48106	Negative	protein_coding	-270258	Distal non-target gene eQTMs
ENSG00000172663	cg23347400	TMEM134	chr11	-13.7848	1.93761	6.29e-07	1.35e-06	-783721	Positive	protein_coding	-268831	Distal non-target gene eQTMs
ENSG00000172732	cg23347400	MUS81	chr11	-30.4068	4.3439	1.41e-06	2.93e-06	-820863	Positive	protein_coding	-268831	Distal non-target gene eQTMs
ENSG00000172613	cg23347400	RAD9A	chr11	-10.1173	1.70269	6.73e-05	0.0001187	639882	Positive	protein_coding	-268831	Distal non-target gene eQTMs
ENSG00000175482	cg23347400	POLD4	chr11	-5.10655	1.09221	0.0113132	0.015553	-672783	Positive	protein_coding	-268831	Distal non-target gene eQTMs
ENSG00000228889	cg14348288	UBAC2-AS1	chr13	0.227941	0.0435106	0.0025546	0.00380872	260928	Positive	lincRNA	-268558	Distal non-target gene eQTMs
ENSG00000163808	cg22331294	KIF15	chr3	-0.319615	0.0572172	0.00080327	0.00126671	-895086	Negative	protein_coding	-268301	Distal non-target gene eQTMs
ENSG00000170445	cg12664940	HARS	chr5	-5.48785	1.28661	0.0373362	0.0478651	377386	Negative	protein_coding	-265154	Distal non-target gene eQTMs
ENSG00000137166	cg00034019	FOXP4	chr6	-9.67703	0.610694	6.72e-25	8.65e-24	-504064	Positive	protein_coding	-263948	Distal non-target gene eQTMs
ENSG00000112561	cg00034019	TFEB	chr6	-4.28636	0.315352	1.62e-19	1.17e-18	366512	Negative	protein_coding	-263948	Distal non-target gene eQTMs
ENSG00000214736	cg00034019	TOMM6	chr6	7.8818	0.622651	7.66e-19	5.16e-18	-262828	Positive	protein_coding	-263948	Distal non-target gene eQTMs
ENSG00000024048	cg00034019	UBR2	chr6	12.0056	0.933686	1.26e-18	8.32e-18	513572	Negative	protein_coding	-263948	Distal non-target gene eQTMs
ENSG00000124596	cg00034019	OARD1	chr6	8.44903	0.807813	8.62e-15	3.89e-14	1016863	Positive	protein_coding	-263948	Distal non-target gene eQTMs
ENSG00000062194	cg19557190	GPBP1	chr5	26.4795	3.13962	5.34e-10	1.53e-09	48	Positive	protein_coding	-263186	Distal non-target gene eQTMs
ENSG00000167371	cg01311051	PRRT2	chr16	-19.4692	4.17138	0.00957144	0.01328	-242194	Negative	protein_coding	-262857	Distal non-target gene eQTMs
ENSG00000123989	cg07867558	CHPF	chr2	38.4491	2.45736	3.02e-22	2.91e-21	-879206	Positive	protein_coding	-261486	Distal non-target gene eQTMs
ENSG00000123999	cg25224376	INHA	chr2	-3.26726	0.458464	4.36e-05	7.82e-05	909541	Negative	protein_coding	-261365	Distal non-target gene eQTMs
ENSG00000224928	cg25859012	KRT8P30	chr2	-0.339059	0.0445171	5.65e-08	1.34e-07	-293846	Positive	processed_pseudogene	-261299	Distal non-target gene eQTMs
ENSG00000127824	cg25859012	TUBA4A	chr2	-10.6783	2.49556	0.0291387	0.0379118	-590155	Negative	protein_coding	-261299	Distal non-target gene eQTMs
ENSG00000278558	cg02723399	TMEM191B	chr22	-0.675866	0.0621365	2.6e-13	1.02e-12	-904845	Negative	protein_coding	-261252	Distal non-target gene eQTMs
ENSG00000273300	cg02723399	AC000068.9	chr22	0.301438	0.040163	3.79e-07	8.33e-07	21532	Positive	antisense	-261252	Distal non-target gene eQTMs
ENSG00000185608	cg09685568	MRPL40	chr22	-2.7877	0.31031	9.34e-11	2.85e-10	986	Positive	protein_coding	-259521	Distal non-target gene eQTMs
ENSG00000117174	cg02487061	ZNHIT6	chr1	3.40116	0.608896	0.00085155	0.00133888	-393850	Positive	protein_coding	-258454	Distal non-target gene eQTMs
ENSG00000167617	cg08159995	CDC42EP5	chr19	-0.877613	0.0686042	1.2e-15	5.9e-15	942770	Positive	protein_coding	-258442	Distal non-target gene eQTMs
ENSG00000053524	cg00067768	MCF2L2	chr3	14.8346	2.07178	2.49e-07	5.56e-07	990843	Positive	protein_coding	-257950	Distal non-target gene eQTMs
ENSG00000051825	cg01188069	MPHOSPH9	chr12	-16.5247	1.11605	4.91e-22	4.62e-21	86485	Negative	protein_coding	-257156	Distal non-target gene eQTMs
ENSG00000184752	cg19510484	NDUFA12	chr12	-7.35099	0.411218	9.47e-32	2.59e-30	577213	Positive	protein_coding	-256786	Distal non-target gene eQTMs
ENSG00000139343	cg19510484	SNRPF	chr12	-4.13309	0.264511	6.01e-25	7.79e-24	384660	Positive	protein_coding	-256786	Distal non-target gene eQTMs
ENSG00000074527	cg09704741	NTN4	chr12	-0.879159	0.179204	0.00241263	0.00360868	-183821	Negative	protein_coding	-256504	Distal non-target gene eQTMs
ENSG00000182117	cg25494600	NOP10	chr15	-3.15722	0.218351	7.42e-24	8.51e-23	-116766	Positive	protein_coding	-256227	Distal non-target gene eQTMs
ENSG00000227986	cg10988062	TRIM60P18	chr7	-1.95516	0.100644	5.18e-34	1.98e-32	-207978	Negative	unprocessed_pseudogene	-255597	Distal non-target gene eQTMs
ENSG00000262772	cg10402316	RP11-353N14.2	chr17	-1.16127	0.231014	0.00292587	0.00433139	986588	Negative	lincRNA	-255101	Distal non-target gene eQTMs
ENSG00000129009	cg10294252	ISLR	chr15	-3.41049	0.499863	0.00112923	0.00175212	-446423	Negative	protein_coding	-254698	Distal non-target gene eQTMs
ENSG00000179912	cg02011404	R3HDM2	chr12	30.4422	1.95253	9.87e-24	1.12e-22	-247014	Positive	protein_coding	-254587	Distal non-target gene eQTMs
ENSG00000135506	cg02011404	OS9	chr12	24.8225	3.15064	8.03e-08	1.88e-07	687207	Negative	protein_coding	-254587	Distal non-target gene eQTMs
ENSG00000170458	cg10868715	CD14	chr5	3.05137	0.401416	1.15e-05	2.19e-05	408829	Positive	protein_coding	-254421	Distal non-target gene eQTMs
ENSG00000069812	cg11554771	HES2	chr1	1.93484	0.461547	0.0333656	0.0430892	-166888	Positive	protein_coding	-254064	Distal non-target gene eQTMs
ENSG00000075240	cg22396353	GRAMD4	chr22	-9.87825	0.628971	2.25e-24	2.74e-23	279222	Negative	protein_coding	-251937	Distal non-target gene eQTMs
ENSG00000130638	cg22396353	ATXN10	chr22	17.1699	1.58341	3.42e-14	1.45e-13	-624992	Positive	protein_coding	-251937	Distal non-target gene eQTMs
ENSG00000134343	cg12259297	ANO3	chr11	-1.92536	0.367078	0.00305371	0.00451076	-1161951	Negative	protein_coding	-251437	Distal non-target gene eQTMs
ENSG00000143315	cg08038078	PIGM	chr1	11.9539	0.752937	1.12e-23	1.26e-22	7351	Positive	protein_coding	-251372	Distal non-target gene eQTMs
ENSG00000184445	cg19858718	KNTC1	chr12	5.68074	0.551655	8.64e-13	3.21e-12	-705628	Positive	protein_coding	-251225	Distal non-target gene eQTMs
ENSG00000269938	cg19858718	RP11-214K3.20	chr12	0.256099	0.0450404	0.00062025	0.00099036	-735149	Positive	sense_intronic	-251225	Distal non-target gene eQTMs
ENSG00000099977	cg03787228	DDT	chr22	1.75112	0.199535	7.27e-11	2.24e-10	550635	Negative	protein_coding	-251183	Distal non-target gene eQTMs
ENSG00000100028	cg23131454	SNRPD3	chr22	23.2817	0.881677	2.9e-45	5.25e-43	34124	Positive	protein_coding	-251017	Distal non-target gene eQTMs
ENSG00000185344	cg05881947	ATP6V0A2	chr12	-4.44706	0.30947	5.87e-23	6.1e-22	480109	Positive	protein_coding	-250595	Distal non-target gene eQTMs
ENSG00000184220	cg22294685	CMSS1	chr3	-2.71444	0.490407	0.0001185	0.0002034	835338	Negative	protein_coding	-250263	Distal non-target gene eQTMs
ENSG00000256514	cg20054027	AP003419.11	chr11	-1.82102	0.299818	9.19e-05	0.0001599	-508323	Negative	protein_coding	-250166	Distal non-target gene eQTMs
ENSG00000165548	cg06833954	TMEM63C	chr14	-4.81115	0.930351	0.00183499	0.00278321	40868	Negative	protein_coding	-249328	Distal non-target gene eQTMs
ENSG00000100577	cg06833954	GSTZ1	chr14	-2.70366	0.642445	0.0317033	0.041045	245296	Negative	protein_coding	-249328	Distal non-target gene eQTMs
ENSG00000262001	cg24732823	DLGAP1-AS2	chr18	-0.965377	0.184828	0.00190823	0.00288715	340457	Negative	antisense	-249228	Distal non-target gene eQTMs
ENSG00000272449	cg04882365	RP3-395M20.12	chr1	-1.89585	0.130649	2.8e-12	9.89e-12	-787558	Negative	lincRNA	-248454	Distal non-target gene eQTMs
ENSG00000101574	cg19974477	METTL4	chr18	-2.6872	0.280395	3e-12	1.06e-11	723814	Positive	protein_coding	-248024	Distal non-target gene eQTMs
ENSG00000128463	cg12670550	EMC4	chr15	5.10207	0.816407	7.46e-05	0.00013104	9030	Positive	protein_coding	-247263	Distal non-target gene eQTMs
ENSG00000159348	cg07098528	CYB5R1	chr1	7.06913	1.44621	0.00304388	0.00449698	310947	Positive	protein_coding	-246322	Distal non-target gene eQTMs
ENSG00000213638	cg21959594	ADAT3	chr19	0.404543	0.0191962	1.66e-31	4.43e-30	92340	Positive	protein_coding	-245001	Distal non-target gene eQTMs
ENSG00000108961	cg27075175	RANGRF	chr17	5.89424	0.704047	1.13e-08	2.86e-08	715920	Negative	protein_coding	-243341	Distal non-target gene eQTMs
ENSG00000170291	cg27075175	ELP5	chr17	5.26439	0.885034	0.00013803	0.00023525	-321318	Negative	protein_coding	-243341	Distal non-target gene eQTMs
ENSG00000175216	cg23072973	CKAP5	chr11	69.4388	7.09093	1e-11	3.36e-11	418861	Positive	protein_coding	-243267	Distal non-target gene eQTMs
ENSG00000025434	cg23072973	NR1H3	chr11	-2.74574	0.362791	8.51e-07	1.81e-06	86391	Negative	protein_coding	-243267	Distal non-target gene eQTMs
ENSG00000179862	cg23729340	CITED4	chr1	-0.922252	0.0962617	9.88e-11	3.01e-10	-521202	Negative	protein_coding	-242146	Distal non-target gene eQTMs
ENSG00000033800	cg07709080	PIAS1	chr15	-22.2922	4.51842	0.00231524	0.00347098	-766935	Negative	protein_coding	-242145	Distal non-target gene eQTMs
ENSG00000215252	cg19449227	GOLGA8B	chr15	-52.5104	4.42778	8.78e-19	5.88e-18	-315504	Negative	protein_coding	-240983	Distal non-target gene eQTMs
ENSG00000250007	cg05855071	RP11-814P5.1	chr15	4.21029	0.490775	5.58e-10	1.59e-09	545566	Positive	antisense	-240798	Distal non-target gene eQTMs
ENSG00000198791	cg22508229	CNOT7	chr8	-16.4063	2.05128	2.16e-08	5.33e-08	-69254	Negative	protein_coding	-240668	Distal non-target gene eQTMs
ENSG00000155975	cg22508229	VPS37A	chr8	-14.6132	2.09244	2.44e-07	5.46e-07	91219	Negative	protein_coding	-240668	Distal non-target gene eQTMs
ENSG00000171103	cg19189422	TRMT61B	chr2	-1.53296	0.178182	8.9e-11	2.72e-10	347325	Negative	protein_coding	-240535	Distal non-target gene eQTMs
ENSG00000138231	cg21798964	DBR1	chr3	2.18685	0.240523	1.52e-10	4.56e-10	673920	Positive	protein_coding	-240394	Distal non-target gene eQTMs
ENSG00000158163	cg16182126	DZIP1L	chr3	-2.93038	0.470034	9.22e-06	1.77e-05	772012	Negative	protein_coding	-239464	Distal non-target gene eQTMs
ENSG00000135776	cg12061711	ABCB10	chr1	3.97579	0.516772	2.72e-08	6.66e-08	-8186	Positive	protein_coding	-237368	Distal non-target gene eQTMs
ENSG00000214719	cg02392688	AC005562.1	chr17	3.25381	0.533305	1.93e-05	3.59e-05	987131	Positive	processed_transcript	-237264	Distal non-target gene eQTMs
ENSG00000196218	cg11259183	RYR1	chr19	-21.2704	2.51797	3.13e-08	7.62e-08	-887019	Negative	protein_coding	-236805	Distal non-target gene eQTMs
ENSG00000276449	cg03734784	AC004076.5	chr19	-0.97482	0.151296	2.6e-05	4.77e-05	-150648	Negative	antisense	-236771	Distal non-target gene eQTMs
ENSG00000269155	cg09082077	RP3-431P23.5	chr6	1.18868	0.159137	1.22e-06	2.55e-06	653090	Positive	lincRNA	-235989	Distal non-target gene eQTMs
ENSG00000135829	cg10240684	DHX9	chr1	63.919	7.79528	1.93e-09	5.27e-09	167	Positive	protein_coding	-234772	Distal non-target gene eQTMs
ENSG00000254427	cg16480966	RP11-430H10.1	chr11	-0.427028	0.08421	0.00235755	0.00353019	-764464	Negative	lincRNA	-234184	Distal non-target gene eQTMs
ENSG00000108256	cg01406758	NUFIP2	chr17	-40.8139	3.69238	2.61e-13	1.02e-12	-303457	Negative	protein_coding	-233953	Distal non-target gene eQTMs
ENSG00000087095	cg01406758	NLK	chr17	-35.8881	3.45303	5.55e-13	2.1e-12	-910645	Negative	protein_coding	-233953	Distal non-target gene eQTMs
ENSG00000120370	cg25353026	GORAB	chr1	-4.08438	0.425101	1.83e-13	7.25e-13	637754	Positive	protein_coding	-232368	Distal non-target gene eQTMs
ENSG00000228224	cg14490552	NACAP1	chr8	1.97321	0.0823135	5.94e-43	7.25e-41	408420	Negative	transcribed_processed_pseudogene	-230565	Distal non-target gene eQTMs
ENSG00000251013	cg14490552	GAPDHP62	chr8	-0.174173	0.0279846	4.05e-05	7.29e-05	402650	Negative	processed_pseudogene	-230565	Distal non-target gene eQTMs
ENSG00000275854	cg26865201	RP11-278C7.5	chr12	0.422782	0.0937292	0.00605607	0.00862873	-777702	Positive	sense_intronic	-230054	Distal non-target gene eQTMs
ENSG00000264772	cg26209290	RP11-186B7.4	chr17	1.72072	0.322598	0.00854118	0.0119297	-11688	Positive	processed_transcript	-229391	Distal non-target gene eQTMs
ENSG00000168016	cg19132762	TRANK1	chr3	-7.77561	0.775285	1.99e-14	8.65e-14	166428	Positive	protein_coding	-228899	Distal non-target gene eQTMs
ENSG00000230409	cg16433211	TCEA1P2	chr3	0.807228	0.0691644	3.42e-16	1.77e-15	282491	Positive	processed_pseudogene	-228853	Distal non-target gene eQTMs
ENSG00000186106	cg18891615	ANKRD46	chr8	-6.54359	0.913163	3.23e-07	7.15e-07	440945	Negative	protein_coding	-227888	Distal non-target gene eQTMs
ENSG00000127329	cg09177306	PTPRB	chr12	1.78388	0.323085	0.00025666	0.00042627	-931247	Positive	protein_coding	-224916	Distal non-target gene eQTMs
ENSG00000245025	cg26809197	RP11-875O11.1	chr8	0.339643	0.0286893	7.93e-15	3.59e-14	698719	Positive	antisense	-224714	Distal non-target gene eQTMs
ENSG00000175606	cg07300108	TMEM70	chr8	1.76186	0.352894	0.00084849	0.00133431	135	Negative	protein_coding	-224594	Distal non-target gene eQTMs
ENSG00000246067	cg14662260	RAB30-AS1	chr11	4.22183	0.563435	5.46e-07	1.18e-06	-122396	Positive	lincRNA	-223864	Distal non-target gene eQTMs
ENSG00000108055	cg21165870	SMC3	chr10	-21.9867	4.55017	0.00339416	0.00498766	-300412	Positive	protein_coding	-223706	Distal non-target gene eQTMs
ENSG00000140280	cg19837587	LYSMD2	chr15	2.52691	0.469289	0.00020598	0.000345	-813947	Negative	protein_coding	-222249	Distal non-target gene eQTMs
ENSG00000185591	cg01561506	SP1	chr12	18.2954	2.18141	2.01e-09	5.47e-09	-827438	Positive	protein_coding	-222095	Distal non-target gene eQTMs
ENSG00000140287	cg27183811	HDC	chr15	3.39593	0.585382	3.94e-05	7.1e-05	666703	Negative	protein_coding	-221835	Distal non-target gene eQTMs
ENSG00000081014	cg17123237	AP4E1	chr15	5.94304	0.472379	2.76e-18	1.77e-17	154	Positive	protein_coding	-221703	Distal non-target gene eQTMs
ENSG00000104093	cg17123237	DMXL2	chr15	37.6227	3.57456	1.24e-14	5.51e-14	-539193	Positive	protein_coding	-221703	Distal non-target gene eQTMs
ENSG00000253958	cg05062393	CLDN23	chr8	0.33535	0.0290021	1.19e-16	6.44e-16	-301830	Positive	protein_coding	-221289	Distal non-target gene eQTMs
ENSG00000104043	cg21246271	ATP8B4	chr15	1.55449	0.164863	1.66e-10	4.96e-10	1049824	Negative	protein_coding	-221247	Distal non-target gene eQTMs
ENSG00000276168	cg26479615	RN7SL1	chr14	103.077	9.5366	6.95e-09	1.8e-08	-946100	Positive	misc_RNA	-220354	Distal non-target gene eQTMs
ENSG00000274012	cg26479615	RN7SL2	chr14	134.138	19.2222	0.0101921	0.0140945	670130	Positive	misc_RNA	-220354	Distal non-target gene eQTMs
ENSG00000273149	cg09745861	RP11-290D2.6	chr13	0.372318	0.0357816	1.06e-13	4.29e-13	39820	Positive	antisense	-217094	Distal non-target gene eQTMs
ENSG00000228109	cg14514949	MFI2-AS1	chr3	-3.74949	0.321691	4.56e-12	1.57e-11	494927	Negative	antisense	-216576	Distal non-target gene eQTMs
ENSG00000227621	cg25622749	PHBP11	chr1	-0.17919	0.0378061	0.00300622	0.00444359	473674	Negative	processed_pseudogene	-216166	Distal non-target gene eQTMs
ENSG00000150712	cg26880493	MTMR12	chr5	-3.48772	0.288925	1.77e-18	1.15e-17	-371915	Negative	protein_coding	-215669	Distal non-target gene eQTMs
ENSG00000145781	cg19097648	COMMD10	chr5	-3.41585	0.279589	9.19e-19	6.15e-18	243252	Negative	protein_coding	-215603	Distal non-target gene eQTMs
ENSG00000177879	cg19097648	AP3S1	chr5	-9.71827	0.795408	4.25e-17	2.4e-16	-172	Negative	protein_coding	-215603	Distal non-target gene eQTMs
ENSG00000145782	cg19097648	ATG12	chr5	-9.12058	0.773138	4.52e-16	2.31e-15	13564	Negative	protein_coding	-215603	Distal non-target gene eQTMs
ENSG00000164219	cg19097648	PGGT1B	chr5	-11.091	1.57724	1.35e-07	3.1e-07	637752	Negative	protein_coding	-215603	Distal non-target gene eQTMs
ENSG00000145780	cg19097648	FEM1C	chr5	-10.5908	1.48002	4.45e-07	9.73e-07	320856	Positive	protein_coding	-215603	Distal non-target gene eQTMs
ENSG00000172901	cg19097648	LVRN	chr5	-0.242027	0.0325733	2.78e-06	5.61e-06	120690	Negative	protein_coding	-215603	Distal non-target gene eQTMs
ENSG00000108846	cg27019821	ABCC3	chr17	-8.89659	1.80314	0.0289599	0.0376988	-59623	Negative	protein_coding	-215600	Distal non-target gene eQTMs
ENSG00000163960	cg16185365	UBXN7	chr3	67.5697	4.68553	1.89e-22	1.86e-21	155775	Positive	protein_coding	-215480	Distal non-target gene eQTMs
ENSG00000072274	cg16185365	TFRC	chr3	79.6223	8.45592	5.91e-11	1.84e-10	476254	Positive	protein_coding	-215480	Distal non-target gene eQTMs
ENSG00000239528	cg15803343	RPS14P8	chr5	-1.58059	0.266259	4.49e-05	8.05e-05	721236	Negative	processed_pseudogene	-215165	Distal non-target gene eQTMs
ENSG00000140527	cg01964282	WDR93	chr15	-0.438171	0.059843	1.75e-07	3.98e-07	672458	Negative	protein_coding	-214910	Distal non-target gene eQTMs
ENSG00000164440	cg03193349	TXLNB	chr6	0.964252	0.132141	2.67e-06	5.4e-06	-251588	Positive	protein_coding	-214821	Distal non-target gene eQTMs
ENSG00000157423	cg10485162	HYDIN	chr16	-12.5505	1.81097	1.32e-06	2.75e-06	-148106	Positive	protein_coding	-214741	Distal non-target gene eQTMs
ENSG00000206190	cg26958654	ATP10A	chr15	1.06157	0.212543	0.00445953	0.00646082	-484549	Positive	protein_coding	-214141	Distal non-target gene eQTMs
ENSG00000175691	cg22927429	ZNF77	chr19	1.86501	0.363444	0.00776593	0.0109076	583712	Positive	protein_coding	-213927	Distal non-target gene eQTMs
ENSG00000269955	cg03764092	C7orf55-LUC7L2	chr7	-5.5925	1.38374	0.0385667	0.0493634	-649694	Negative	protein_coding	-213276	Distal non-target gene eQTMs
ENSG00000146085	cg04767442	MUT	chr6	-7.52668	0.696939	1.01e-15	5e-15	419446	Negative	protein_coding	-212967	Distal non-target gene eQTMs
ENSG00000031691	cg04767442	CENPQ	chr6	-0.476281	0.123607	0.0305746	0.0396567	-386436	Negative	protein_coding	-212967	Distal non-target gene eQTMs
ENSG00000273162	cg13999981	RP11-108L7.15	chr10	-0.169809	0.0172298	1.05e-11	3.52e-11	382388	Negative	lincRNA	-212823	Distal non-target gene eQTMs
ENSG00000116560	cg04263115	SFPQ	chr1	74.6163	10.7328	3.74e-07	8.22e-07	593702	Positive	protein_coding	-212607	Distal non-target gene eQTMs
ENSG00000187513	cg04263115	GJA4	chr1	-0.707859	0.124504	0.00061874	0.00098812	-977081	Negative	protein_coding	-212607	Distal non-target gene eQTMs
ENSG00000259426	cg25874953	RP11-253M7.1	chr15	0.873962	0.0579902	5.37e-23	5.62e-22	-606794	Positive	antisense	-211141	Distal non-target gene eQTMs
ENSG00000142632	cg26923754	ARHGEF19	chr1	-0.975121	0.119858	2.94e-07	6.53e-07	-461227	Negative	protein_coding	-209814	Distal non-target gene eQTMs
ENSG00000037637	cg05510104	FBXO42	chr1	8.10163	1.1119	9.97e-07	2.1e-06	-510600	Positive	protein_coding	-209427	Distal non-target gene eQTMs
ENSG00000186575	cg19293995	NF2	chr22	34.842	1.10356	9.19e-55	8.08e-52	-685726	Negative	protein_coding	-209108	Distal non-target gene eQTMs
ENSG00000185340	cg19293995	GAS2L1	chr22	10.3956	0.640332	2.62e-26	3.95e-25	-982700	Positive	protein_coding	-209108	Distal non-target gene eQTMs
ENSG00000099995	cg19293995	SF3A1	chr22	16.9052	2.7096	2.32e-05	4.28e-05	-42706	Positive	protein_coding	-209108	Distal non-target gene eQTMs
ENSG00000237638	cg03813437	AC007386.2	chr2	1.28147	0.0554092	4.36e-39	3.21e-37	534865	Positive	lincRNA	-208952	Distal non-target gene eQTMs
ENSG00000116251	cg05895952	RPL22	chr1	120.613	5.79425	1.23e-36	6.67e-35	14613	Positive	protein_coding	-208167	Distal non-target gene eQTMs
ENSG00000007923	cg05895952	DNAJC11	chr1	-14.4307	0.980973	1.82e-23	2e-22	-434535	Positive	protein_coding	-208167	Distal non-target gene eQTMs
ENSG00000204859	cg05895952	ZBTB48	chr1	-5.55509	0.563802	1.14e-12	4.2e-12	380361	Negative	protein_coding	-208167	Distal non-target gene eQTMs
ENSG00000141314	cg19617599	RHBDL3	chr17	-18.4424	3.18759	4.82e-05	8.62e-05	-84151	Negative	protein_coding	-207529	Distal non-target gene eQTMs
ENSG00000248643	cg00182294	RBM14-RBM4	chr11	1.93708	0.275477	8.25e-06	1.59e-05	358958	Positive	protein_coding	-206939	Distal non-target gene eQTMs
ENSG00000164077	cg20402382	MON1A	chr3	1.92761	0.140377	6.34e-21	5.27e-20	-233063	Positive	protein_coding	-205394	Distal non-target gene eQTMs
ENSG00000085788	cg26689303	DDHD2	chr8	30.9903	3.74513	1.14e-08	2.89e-08	-155661	Negative	protein_coding	-204346	Distal non-target gene eQTMs
ENSG00000147471	cg26689303	PROSC	chr8	4.50107	0.79194	0.00026279	0.00043588	-618284	Positive	protein_coding	-204346	Distal non-target gene eQTMs
ENSG00000163545	cg16376736	NUAK2	chr1	1.02644	0.181211	0.00053244	0.00085661	-907555	Positive	protein_coding	-204180	Distal non-target gene eQTMs
ENSG00000186326	cg19186950	RGS9BP	chr19	17.959	2.04653	3.37e-08	8.19e-08	-500791	Positive	protein_coding	-203989	Distal non-target gene eQTMs
ENSG00000153885	cg19186950	KCTD15	chr19	9.39496	1.88057	0.00173975	0.00264591	619735	Negative	protein_coding	-203989	Distal non-target gene eQTMs
ENSG00000186594	cg16065220	MIR22HG	chr17	7.20738	1.01973	2.14e-06	4.37e-06	542421	Positive	lincRNA	-203906	Distal non-target gene eQTMs
ENSG00000198216	cg01190965	CACNA1E	chr1	2.77667	0.575001	0.00271962	0.00404308	-1471624	Positive	protein_coding	-200058	Distal non-target gene eQTMs
ENSG00000145194	cg06577604	ECE2	chr3	12.8261	1.68113	9.43e-08	2.2e-07	-285644	Positive	protein_coding	-200004	Distal non-target gene eQTMs
ENSG00000163900	cg20935483	TMEM41A	chr3	-2.86655	0.237735	8.63e-18	5.26e-17	-915395	Negative	protein_coding	-199450	Distal non-target gene eQTMs
ENSG00000261408	cg17977546	TEN1-CDK3	chr17	4.41402	0.709559	0.00020375	0.00034142	-527510	Positive	protein_coding	-198743	Distal non-target gene eQTMs
ENSG00000104081	cg18388559	BMF	chr15	2.58286	0.479209	0.00299388	0.00442573	805950	Positive	protein_coding	-198733	Distal non-target gene eQTMs
ENSG00000261549	cg27219955	RP11-320A16.1	chr15	10.1079	1.29849	6.25e-07	1.34e-06	-155167	Positive	processed_pseudogene	-198199	Distal non-target gene eQTMs
ENSG00000283189	cg01862420	RP11-949J7.8	chr3	-4.19281	0.361387	1.02e-15	5.05e-15	-980393	Negative	protein_coding	-195284	Distal non-target gene eQTMs
ENSG00000256092	cg22845677	RP13-942N8.1	chr12	-1.14009	0.166675	2.01e-05	3.73e-05	-102485	Negative	lincRNA	-194019	Distal non-target gene eQTMs
ENSG00000001629	cg24896109	ANKIB1	chr7	33.7671	3.81639	2.75e-10	8.06e-10	111281	Positive	protein_coding	-193826	Distal non-target gene eQTMs
ENSG00000001631	cg11421459	KRIT1	chr7	22.1037	2.0812	2.21e-15	1.06e-14	-64294	Positive	protein_coding	-193808	Distal non-target gene eQTMs
ENSG00000230551	cg06899802	CTB-89H12.4	chr5	84.8896	5.37123	3.34e-26	4.99e-25	57210	Negative	processed_transcript	-193517	Distal non-target gene eQTMs
ENSG00000070814	cg06899802	TCOF1	chr5	-37.519	2.56909	1.02e-23	1.16e-22	806105	Positive	protein_coding	-193517	Distal non-target gene eQTMs
ENSG00000070614	cg06899802	NDST1	chr5	-23.6645	3.56688	1.23e-06	2.57e-06	934294	Positive	protein_coding	-193517	Distal non-target gene eQTMs
ENSG00000237499	cg10901280	RP11-356I2.4	chr6	-6.5861	0.692804	1.05e-11	3.52e-11	42672	Negative	antisense	-192967	Distal non-target gene eQTMs
ENSG00000118503	cg10901280	TNFAIP3	chr6	-10.3918	2.29097	0.00623177	0.008869	869	Negative	protein_coding	-192967	Distal non-target gene eQTMs
ENSG00000183876	cg22928002	ARSI	chr5	1.12179	0.132131	1.27e-06	2.65e-06	-746122	Positive	protein_coding	-192214	Distal non-target gene eQTMs
ENSG00000019582	cg22928002	CD74	chr5	48.845	6.92933	0.00039132	0.00063846	-849820	Positive	protein_coding	-192214	Distal non-target gene eQTMs
ENSG00000103995	cg20973743	CEP152	chr15	-8.89321	1.23675	3.18e-06	6.38e-06	442657	Negative	protein_coding	-192141	Distal non-target gene eQTMs
ENSG00000244480	cg18873686	AC005154.7	chr7	1.66416	0.226502	2.02e-07	4.56e-07	219325	Positive	transcribed_processed_pseudogene	-191707	Distal non-target gene eQTMs
ENSG00000272686	cg21335509	RP11-390E23.6	chr7	-0.937574	0.139073	5.38e-07	1.16e-06	-821	Positive	antisense	-191634	Distal non-target gene eQTMs
ENSG00000136478	cg03376183	TEX2	chr17	-14.4147	0.929585	1.62e-25	2.24e-24	-524816	Positive	protein_coding	-191322	Distal non-target gene eQTMs
ENSG00000135537	cg20478327	LACE1	chr6	1.85541	0.269712	2.51e-06	5.09e-06	-456153	Positive	protein_coding	-191212	Distal non-target gene eQTMs
ENSG00000173227	cg24357714	SYT12	chr11	1.01919	0.150192	5.88e-05	0.00010423	-501891	Positive	protein_coding	-190798	Distal non-target gene eQTMs
ENSG00000119655	cg06291595	NPC2	chr14	-17.2839	3.09094	0.00989927	0.0137078	17397	Negative	protein_coding	-190520	Distal non-target gene eQTMs
ENSG00000119725	cg00974835	ZNF410	chr14	-7.58135	0.719658	2.93e-11	9.38e-11	-606958	Negative	protein_coding	-190506	Distal non-target gene eQTMs
ENSG00000186998	cg08048137	EMID1	chr22	0.504199	0.0477343	8.95e-14	3.65e-13	132165	Negative	protein_coding	-190139	Distal non-target gene eQTMs
ENSG00000010310	cg03879902	GIPR	chr19	-7.54201	1.05603	1.12e-06	2.35e-06	-393	Negative	protein_coding	-189786	Distal non-target gene eQTMs
ENSG00000068745	cg01313363	IP6K2	chr3	8.01494	1.33432	8.28e-05	0.00014471	-257717	Positive	protein_coding	-189186	Distal non-target gene eQTMs
ENSG00000114859	cg05197962	CLCN2	chr3	-6.75564	0.965583	7.93e-07	1.69e-06	-709609	Negative	protein_coding	-188968	Distal non-target gene eQTMs
ENSG00000104783	cg21194911	KCNN4	chr19	0.8344	0.141194	0.0001649	0.00027905	446047	Positive	protein_coding	-187226	Distal non-target gene eQTMs
ENSG00000184669	cg25271334	OR7E14P	chr11	0.526075	0.114627	0.00596412	0.00850393	-719783	Positive	transcribed_unprocessed_pseudogene	-186408	Distal non-target gene eQTMs
ENSG00000280149	cg10360941	RP4-751H13.5	chr7	-0.330266	0.0376675	6.39e-10	1.81e-09	967879	Negative	TEC	-185779	Distal non-target gene eQTMs
ENSG00000197479	cg07493760	PCDHB11	chr5	-2.09702	0.132484	5.64e-22	5.28e-21	839484	Negative	protein_coding	-185456	Distal non-target gene eQTMs
ENSG00000120327	cg07493760	PCDHB14	chr5	-2.55117	0.292353	1.78e-09	4.87e-09	862834	Negative	protein_coding	-185456	Distal non-target gene eQTMs
ENSG00000081853	cg07493760	PCDHGA2	chr5	-5.11088	0.519148	1.03e-08	2.62e-08	978662	Negative	protein_coding	-185456	Distal non-target gene eQTMs
ENSG00000280106	cg13830730	CTC-523E23.3	chr19	-1.04423	0.208985	0.00552195	0.00790295	768558	Positive	TEC	-184184	Distal non-target gene eQTMs
ENSG00000100263	cg24062706	RHBDD3	chr22	6.70467	0.365725	2.04e-31	5.41e-30	1003063	Positive	protein_coding	-182761	Distal non-target gene eQTMs
ENSG00000198832	cg24062706	SELM	chr22	7.93604	0.415007	4.48e-30	1.01e-28	-841837	Negative	protein_coding	-182761	Distal non-target gene eQTMs
ENSG00000100036	cg24062706	SLC35E4	chr22	1.91189	0.139661	1.61e-21	1.43e-20	372846	Negative	protein_coding	-182761	Distal non-target gene eQTMs
ENSG00000185133	cg24062706	INPP5J	chr22	14.9829	1.01429	1.81e-21	1.59e-20	859796	Positive	protein_coding	-182761	Distal non-target gene eQTMs
ENSG00000128242	cg24062706	GAL3ST1	chr22	1.93539	0.133998	9.04e-20	6.72e-19	-291700	Negative	protein_coding	-182761	Distal non-target gene eQTMs
ENSG00000253352	cg24062706	TUG1	chr22	-70.7356	5.68856	1.93e-16	1.02e-15	706310	Positive	antisense	-182761	Distal non-target gene eQTMs
ENSG00000100029	cg24062706	PES1	chr22	5.37739	0.503124	9.07e-14	3.7e-13	-313690	Positive	protein_coding	-182761	Distal non-target gene eQTMs
ENSG00000203667	cg13318537	COX20	chr1	58.6818	8.08371	4.63e-07	1.01e-06	633	Negative	protein_coding	-182048	Distal non-target gene eQTMs
ENSG00000117020	cg13318537	AKT3	chr1	66.2399	9.05648	1.12e-06	2.35e-06	1346750	Negative	protein_coding	-182048	Distal non-target gene eQTMs
ENSG00000035687	cg13318537	ADSS	chr1	11.5273	1.83092	1.3e-05	2.46e-05	426489	Positive	protein_coding	-182048	Distal non-target gene eQTMs
ENSG00000120458	cg17585304	MSANTD2	chr11	-3.07071	0.288242	2.29e-13	9e-13	-180048	Negative	protein_coding	-181348	Distal non-target gene eQTMs
ENSG00000166261	cg17585304	ZNF202	chr11	-1.57355	0.190688	3.28e-09	8.77e-09	862536	Negative	protein_coding	-181348	Distal non-target gene eQTMs
ENSG00000271200	cg17414318	RP11-430G17.3	chr1	0.283078	0.0447824	3.73e-06	7.43e-06	-695410	Positive	lincRNA	-181329	Distal non-target gene eQTMs
ENSG00000163873	cg21418854	GRIK3	chr1	-14.695	1.80229	1.35e-08	3.4e-08	-489347	Negative	protein_coding	-180960	Distal non-target gene eQTMs
ENSG00000092850	cg21418854	TEKT2	chr1	-0.278282	0.0417448	1.51e-05	2.84e-05	-222086	Negative	protein_coding	-180960	Distal non-target gene eQTMs
ENSG00000215788	cg23714370	TNFRSF25	chr1	-6.8214	0.662292	5.73e-11	1.79e-10	-288576	Negative	protein_coding	-180744	Distal non-target gene eQTMs
ENSG00000188295	cg03408556	ZNF669	chr1	1.32685	0.293351	0.005581	0.00798161	11445	Negative	protein_coding	-179429	Distal non-target gene eQTMs
ENSG00000250318	cg19544440	CTA-963H5.5	chr22	-0.874266	0.120815	1.56e-06	3.23e-06	-394787	Negative	unprocessed_pseudogene	-178916	Distal non-target gene eQTMs
ENSG00000157933	cg17444015	SKI	chr1	16.2018	0.735637	6.15e-37	3.43e-35	-163223	Positive	protein_coding	-178822	Distal non-target gene eQTMs
ENSG00000205090	cg17444015	TMEM240	chr1	1.93007	0.0979707	4.13e-33	1.37e-31	856764	Positive	protein_coding	-178822	Distal non-target gene eQTMs
ENSG00000157870	cg17444015	FAM213B	chr1	8.30553	0.559769	2.21e-22	2.17e-21	194949	Negative	protein_coding	-178822	Distal non-target gene eQTMs
ENSG00000228594	cg17444015	FNDC10	chr1	3.53205	0.232274	5.63e-21	4.71e-20	793530	Positive	protein_coding	-178822	Distal non-target gene eQTMs
ENSG00000111450	cg10476468	STX2	chr12	-13.7626	1.06253	4.99e-19	3.42e-18	342792	Negative	protein_coding	-178485	Distal non-target gene eQTMs
ENSG00000034533	cg00483533	ASTE1	chr3	0.775867	0.114847	7.7e-07	1.64e-06	14442	Negative	protein_coding	-177722	Distal non-target gene eQTMs
ENSG00000257681	cg21050282	RP11-341G23.4	chr12	0.605844	0.100832	0.0001025	0.00017735	360807	Positive	antisense	-177015	Distal non-target gene eQTMs
ENSG00000246082	cg13147520	NUDT16P1	chr3	0.330543	0.0539057	1.29e-05	2.45e-05	334940	Positive	transcribed_unitary_pseudogene	-176363	Distal non-target gene eQTMs
ENSG00000112365	cg17271232	ZBTB24	chr6	13.2727	3.15788	0.0273678	0.0357745	893387	Positive	protein_coding	-175977	Distal non-target gene eQTMs
ENSG00000277161	cg11455066	PIGW	chr17	1.3991	0.286189	0.00344288	0.00505376	781268	Positive	protein_coding	-175673	Distal non-target gene eQTMs
ENSG00000259562	cg04550693	RP11-762H8.2	chr15	-0.298078	0.0307763	1.22e-11	4.06e-11	148360	Negative	transcribed_processed_pseudogene	-174801	Distal non-target gene eQTMs
ENSG00000219665	cg24894629	CTD-2006C1.2	chr19	-0.759687	0.0746523	1.76e-10	5.25e-10	173507	Negative	processed_transcript	-174334	Distal non-target gene eQTMs
ENSG00000059377	cg04322653	TBXAS1	chr7	-0.697916	0.103328	9.95e-06	1.91e-05	-876643	Negative	protein_coding	-174125	Distal non-target gene eQTMs
ENSG00000128524	cg19776616	ATP6V1F	chr7	18.363	1.49744	1.1e-17	6.64e-17	-922634	Negative	protein_coding	-173776	Distal non-target gene eQTMs
ENSG00000272899	cg19776616	RP11-309L24.4	chr7	0.999188	0.0943675	3.44e-14	1.46e-13	-919160	Positive	protein_coding	-173776	Distal non-target gene eQTMs
ENSG00000250067	cg01400393	YJEFN3	chr19	-18.0448	3.70804	0.00756777	0.0106437	34461	Negative	protein_coding	-173719	Distal non-target gene eQTMs
ENSG00000184949	cg10955164	FAM227A	chr22	-7.6199	0.398504	1.24e-32	3.76e-31	945112	Negative	protein_coding	-173307	Distal non-target gene eQTMs
ENSG00000264058	cg25202618	RP5-1028K7.3	chr17	-2.92869	0.498064	4.83e-05	8.63e-05	-339459	Negative	protein_coding	-172455	Distal non-target gene eQTMs
ENSG00000213625	cg07342512	LEPROT	chr1	-4.74856	0.990881	0.00295414	0.00437028	268	Positive	protein_coding	-172100	Distal non-target gene eQTMs
ENSG00000238213	cg23169677	TARDBPP2	chr13	-1.67795	0.162614	7.31e-14	3.01e-13	-60942	Negative	processed_pseudogene	-171731	Distal non-target gene eQTMs
ENSG00000118960	cg02458141	HS1BP3	chr2	1.74649	0.166398	3.34e-15	1.57e-14	57708	Negative	protein_coding	-171082	Distal non-target gene eQTMs
ENSG00000118961	cg02458141	LDAH	chr2	-2.19343	0.222376	6.63e-13	2.49e-12	-65858	Negative	protein_coding	-171082	Distal non-target gene eQTMs
ENSG00000089597	cg24254177	GANAB	chr11	33.7258	5.39808	1.98e-05	3.68e-05	-50824	Positive	protein_coding	-168899	Distal non-target gene eQTMs
ENSG00000243811	cg16429076	APOBEC3D	chr22	-0.35086	0.0373479	4.72e-10	1.36e-09	-300046	Negative	protein_coding	-168485	Distal non-target gene eQTMs
ENSG00000086102	cg04654830	NFX1	chr9	-5.98787	0.680998	1.56e-09	4.29e-09	737662	Negative	protein_coding	-168247	Distal non-target gene eQTMs
ENSG00000106536	cg16712549	POU6F2	chr7	1.63717	0.345049	0.00719835	0.0101591	-755559	Negative	protein_coding	-167181	Distal non-target gene eQTMs
ENSG00000089916	cg08428898	GPATCH2L	chr14	37.8277	3.06442	1.09e-17	6.58e-17	857687	Positive	protein_coding	-167076	Distal non-target gene eQTMs
ENSG00000119640	cg08428898	ACYP1	chr14	2.86357	0.385661	1.17e-07	2.7e-07	240992	Positive	protein_coding	-167076	Distal non-target gene eQTMs
ENSG00000156162	cg08055093	DPY19L4	chr8	26.8176	5.06001	0.0009394	0.00147016	103	Negative	protein_coding	-166071	Distal non-target gene eQTMs
ENSG00000242372	cg16507179	EIF6	chr20	-6.00356	0.907535	4.75e-06	9.37e-06	841625	Negative	protein_coding	-165972	Distal non-target gene eQTMs
ENSG00000096070	cg01689029	BRPF3	chr6	-13.2908	2.61209	0.00128419	0.00197857	-973718	Positive	protein_coding	-164816	Distal non-target gene eQTMs
ENSG00000243930	cg25733613	RPS12P21	chr11	-1.58954	0.118836	1.35e-20	1.09e-19	451613	Negative	processed_pseudogene	-164322	Distal non-target gene eQTMs
ENSG00000170836	cg03721816	PPM1D	chr17	-2.2994	0.425448	0.00033618	0.00055203	-975189	Negative	protein_coding	-163817	Distal non-target gene eQTMs
ENSG00000128596	cg06242719	CCDC136	chr7	28.9333	3.22966	4.59e-09	1.21e-08	-984263	Positive	protein_coding	-163306	Distal non-target gene eQTMs
ENSG00000080823	cg23470196	MOK	chr14	-103.021	11.7092	1.79e-08	4.46e-08	4834	Negative	protein_coding	-163106	Distal non-target gene eQTMs
ENSG00000205085	cg20507125	FAM71F2	chr7	2.91591	0.246072	5.69e-12	1.95e-11	-715575	Positive	protein_coding	-162840	Distal non-target gene eQTMs
ENSG00000261159	cg22259778	RP11-723O4.9	chr3	0.733195	0.124278	0.00135006	0.00207484	302485	Positive	lincRNA	-160572	Distal non-target gene eQTMs
ENSG00000269035	cg00865724	CTD-2521M24.10	chr19	4.97879	0.575938	0.00914539	0.012715	-200913	Positive	protein_coding	-159917	Distal non-target gene eQTMs
ENSG00000188051	cg00865724	TMEM221	chr19	16.8151	2.65516	0.029834	0.0387447	-199811	Positive	protein_coding	-159917	Distal non-target gene eQTMs
ENSG00000105290	cg21775899	APLP1	chr19	40.8616	2.21504	2.86e-33	9.65e-32	-621702	Positive	protein_coding	-157883	Distal non-target gene eQTMs
ENSG00000189042	cg21775899	ZNF567	chr19	-1.54232	0.132137	6.32e-16	3.18e-15	198011	Positive	protein_coding	-157883	Distal non-target gene eQTMs
ENSG00000189164	cg21775899	ZNF527	chr19	-2.7255	0.260979	7.85e-13	2.93e-12	881460	Negative	protein_coding	-157883	Distal non-target gene eQTMs
ENSG00000126259	cg21775899	KIRREL2	chr19	7.10899	0.781713	2.43e-10	7.16e-10	-633740	Negative	protein_coding	-157883	Distal non-target gene eQTMs
ENSG00000100344	cg26509402	PNPLA3	chr22	-6.94314	1.41491	0.00216235	0.0032512	908246	Negative	protein_coding	-157387	Distal non-target gene eQTMs
ENSG00000167995	cg15456821	BEST1	chr11	-12.2653	1.26656	1.29e-11	4.28e-11	310	Negative	protein_coding	-156773	Distal non-target gene eQTMs
ENSG00000258210	cg13734832	RP11-478C19.2	chr12	-0.703055	0.0659546	9.51e-13	3.52e-12	-106548	Negative	processed_transcript	-156580	Distal non-target gene eQTMs
ENSG00000125844	cg04843900	RRBP1	chr20	38.3395	2.24857	3.33e-28	6.15e-27	-883705	Positive	protein_coding	-156539	Distal non-target gene eQTMs
ENSG00000125851	cg04843900	PCSK2	chr20	32.7633	3.18159	1.35e-13	5.4e-13	496134	Positive	protein_coding	-156539	Distal non-target gene eQTMs
ENSG00000245910	cg20329958	SNHG6	chr8	-7.39195	1.00528	3.34e-07	7.38e-07	-743669	Negative	processed_transcript	-156455	Distal non-target gene eQTMs
ENSG00000086300	cg06206902	SNX10	chr7	-25.7649	5.40409	0.00597851	0.00852376	-859712	Negative	protein_coding	-156368	Distal non-target gene eQTMs
ENSG00000111731	cg17056614	C2CD5	chr12	-33.7153	1.92179	4.7e-31	1.2e-29	407609	Positive	protein_coding	-156333	Distal non-target gene eQTMs
ENSG00000171817	cg07746323	ZNF540	chr19	30.4697	1.93263	6.01e-25	7.79e-24	82368	Positive	protein_coding	-156201	Distal non-target gene eQTMs
ENSG00000137413	cg25658178	TAF8	chr6	3.8907	0.443163	2.1e-10	6.22e-10	108389	Positive	protein_coding	-155582	Distal non-target gene eQTMs
ENSG00000229127	cg11421132	AC007038.7	chr2	-0.578456	0.0725607	3.45e-09	9.2e-09	451317	Negative	antisense	-155197	Distal non-target gene eQTMs
ENSG00000164663	cg10240180	USP49	chr6	-10.7014	0.74244	3.58e-24	4.28e-23	150988	Positive	protein_coding	-154342	Distal non-target gene eQTMs
ENSG00000113621	cg12938158	TXNDC15	chr5	26.4106	3.22423	6.19e-09	1.61e-08	348711	Negative	protein_coding	-154048	Distal non-target gene eQTMs
ENSG00000181904	cg04842522	C5orf24	chr5	-47.7083	8.36499	0.00024093	0.00040109	320684	Positive	protein_coding	-153952	Distal non-target gene eQTMs
ENSG00000113583	cg04842522	C5orf15	chr5	-30.0987	6.6712	0.00808221	0.0113273	569486	Negative	protein_coding	-153952	Distal non-target gene eQTMs
ENSG00000267549	cg08489315	AC006116.17	chr19	-0.328793	0.0482669	1.44e-05	2.72e-05	672575	Negative	antisense	-153724	Distal non-target gene eQTMs
ENSG00000130725	cg02352723	UBE2M	chr19	-15.5532	0.794095	1.67e-34	6.86e-33	-400623	Negative	protein_coding	-153028	Distal non-target gene eQTMs
ENSG00000183655	cg02396967	KLHL25	chr15	1.3796	0.114332	4.26e-18	2.67e-17	473150	Negative	protein_coding	-152503	Distal non-target gene eQTMs
ENSG00000144668	cg13166625	ITGA9	chr3	0.687835	0.128285	0.0002329	0.00038853	-1196264	Positive	protein_coding	-152252	Distal non-target gene eQTMs
ENSG00000272491	cg20465832	RP5-1024N4.4	chr1	-0.295663	0.0571452	0.00383833	0.00559823	-25243	Negative	antisense	-151986	Distal non-target gene eQTMs
ENSG00000197961	cg05370860	ZNF121	chr19	-6.77032	0.980591	3.38e-06	6.76e-06	843405	Negative	protein_coding	-151857	Distal non-target gene eQTMs
ENSG00000267575	cg16912974	CTC-459F4.3	chr19	1.1069	0.141368	1.5e-09	4.13e-09	-1085929	Positive	lincRNA	-151680	Distal non-target gene eQTMs
ENSG00000173156	cg13428943	RHOD	chr11	-1.26598	0.124545	5.51e-07	1.19e-06	-412548	Positive	protein_coding	-151524	Distal non-target gene eQTMs
ENSG00000090539	cg17268882	CHRD	chr3	0.971937	0.0837164	1.07e-13	4.32e-13	-332357	Positive	protein_coding	-150646	Distal non-target gene eQTMs
ENSG00000174437	cg21027450	ATP2A2	chr12	-23.3053	4.26852	0.00049643	0.00080102	-319988	Negative	protein_coding	-150322	Distal non-target gene eQTMs
ENSG00000204514	cg21294424	ZNF814	chr19	-2.35351	0.426708	0.00049817	0.00080369	302186	Negative	protein_coding	-148856	Distal non-target gene eQTMs
ENSG00000083807	cg21877656	SLC27A5	chr19	-1.9354	0.266506	4.8e-07	1.05e-06	-328691	Negative	protein_coding	-148760	Distal non-target gene eQTMs
ENSG00000101417	cg19640878	PXMP4	chr20	-4.04507	0.44934	2.13e-11	6.93e-11	-695922	Negative	protein_coding	-147913	Distal non-target gene eQTMs
ENSG00000143355	cg04113478	LHX9	chr1	-7.40333	1.58336	0.0229443	0.0302556	-11372	Positive	protein_coding	-147578	Distal non-target gene eQTMs
ENSG00000278012	cg01772014	RP1-310O13.13	chr20	-0.295915	0.0531827	0.00058254	0.00093261	-48111	Negative	sense_intronic	-147545	Distal non-target gene eQTMs
ENSG00000068971	cg14395634	PPP2R5B	chr11	25.7889	2.44675	2.22e-13	8.74e-13	-941184	Positive	protein_coding	-146741	Distal non-target gene eQTMs
ENSG00000184076	cg08324001	UQCR10	chr22	11.8289	1.46743	5.68e-09	1.48e-08	-814770	Positive	protein_coding	-146595	Distal non-target gene eQTMs
ENSG00000172757	cg20909159	CFL1	chr11	38.8316	4.15708	2.78e-10	8.15e-10	35454	Positive	protein_coding	-146480	Distal non-target gene eQTMs
ENSG00000176973	cg20909159	FAM89B	chr11	1.91814	0.255272	5.96e-07	1.28e-06	-286127	Positive	protein_coding	-146480	Distal non-target gene eQTMs
ENSG00000255200	cg20909159	AP003068.18	chr11	-0.319554	0.042714	7.39e-07	1.58e-06	684359	Negative	transcribed_processed_pseudogene	-146480	Distal non-target gene eQTMs
ENSG00000242622	cg21941374	RP11-18H7.1	chr3	0.847078	0.0433239	9.19e-35	3.85e-33	-647709	Positive	lincRNA	-146295	Distal non-target gene eQTMs
ENSG00000139433	cg23471890	GLTP	chr12	1.87983	0.204736	2.06e-10	6.11e-10	763124	Positive	protein_coding	-145705	Distal non-target gene eQTMs
ENSG00000174456	cg05703344	C12orf76	chr12	4.56918	0.722206	3.56e-05	6.46e-05	586912	Positive	protein_coding	-145576	Distal non-target gene eQTMs
ENSG00000187189	cg07988091	TSPYL4	chr6	9.31254	2.24946	0.0287616	0.0374572	-3721	Positive	protein_coding	-145391	Distal non-target gene eQTMs
ENSG00000128604	cg11961845	IRF5	chr7	-0.673079	0.126835	0.00235705	0.00352975	-430881	Negative	protein_coding	-143315	Distal non-target gene eQTMs
ENSG00000242498	cg03039025	ARPIN	chr15	-4.18082	0.903636	0.00642281	0.00912094	-553	Negative	protein_coding	-143143	Distal non-target gene eQTMs
ENSG00000204044	cg25427740	RP11-465L10.10	chr20	0.33253	0.0410219	4.41e-09	1.16e-08	-78600	Positive	antisense	-142963	Distal non-target gene eQTMs
ENSG00000053328	cg15319017	METTL24	chr6	0.535831	0.0787021	1.42e-06	2.95e-06	712833	Positive	protein_coding	-142803	Distal non-target gene eQTMs
ENSG00000009413	cg26219797	REV3L	chr6	74.2545	7.06276	9.24e-15	4.15e-14	-340544	Positive	protein_coding	-142526	Distal non-target gene eQTMs
ENSG00000006125	cg03287035	AP2B1	chr17	51.4015	10.5071	0.00369083	0.00539555	455247	Positive	protein_coding	-142305	Distal non-target gene eQTMs
ENSG00000232573	cg15310872	RPL3P4	chr14	-1.20513	0.13026	4.85e-09	1.27e-08	650182	Positive	processed_pseudogene	-141892	Distal non-target gene eQTMs
ENSG00000188133	cg26056471	TMEM215	chr9	25.5001	1.31711	3.19e-34	1.25e-32	257157	Positive	protein_coding	-141780	Distal non-target gene eQTMs
ENSG00000235453	cg26056471	TOPORS-AS1	chr9	-0.794951	0.0703289	7.54e-16	3.78e-15	24761	Negative	protein_coding	-141780	Distal non-target gene eQTMs
ENSG00000068903	cg04570604	SIRT2	chr19	-20.5232	4.44319	0.00873744	0.0121873	654332	Negative	protein_coding	-141584	Distal non-target gene eQTMs
ENSG00000112531	cg10601230	QKI	chr6	33.0762	7.3364	0.00830134	0.0116206	545330	Negative	protein_coding	-141538	Distal non-target gene eQTMs
ENSG00000198844	cg21770157	ARHGEF15	chr17	1.50044	0.246922	0.00989025	0.0136975	451986	Positive	protein_coding	-140901	Distal non-target gene eQTMs
ENSG00000248383	cg12629325	PCDHAC1	chr5	1.63179	0.227982	8.56e-07	1.82e-06	-504	Positive	protein_coding	-140737	Distal non-target gene eQTMs
ENSG00000006025	cg11361827	OSBPL7	chr17	-13.8551	1.39938	1.22e-12	4.48e-12	-17292	Negative	protein_coding	-140604	Distal non-target gene eQTMs
ENSG00000159176	cg27313021	CSRP1	chr1	-22.1431	2.843	9.03e-07	1.91e-06	639337	Negative	protein_coding	-140495	Distal non-target gene eQTMs
ENSG00000247373	cg14530380	RP11-486O12.2	chr12	-1.96199	0.363327	0.00125618	0.00193745	-601275	Negative	lincRNA	-140163	Distal non-target gene eQTMs
ENSG00000220205	cg06935501	VAMP2	chr17	350.893	31.7022	1.23e-12	4.51e-12	-301744	Negative	protein_coding	-140051	Distal non-target gene eQTMs
ENSG00000180340	cg13240753	FZD2	chr17	-2.05152	0.17125	5.17e-12	1.78e-11	218558	Positive	protein_coding	-140019	Distal non-target gene eQTMs
ENSG00000263571	cg14142632	CTC-304I17.5	chr17	-1.66437	0.182047	3.71e-12	1.29e-11	-964693	Negative	lincRNA	-139765	Distal non-target gene eQTMs
ENSG00000119285	cg00419040	HEATR1	chr1	9.28875	0.816516	1.72e-16	9.16e-16	-266919	Positive	protein_coding	-139581	Distal non-target gene eQTMs
ENSG00000280046	cg25184507	RP11-1099M24.6	chr17	-3.89108	0.406604	1.06e-10	3.22e-10	2114	Negative	TEC	-139475	Distal non-target gene eQTMs
ENSG00000108684	cg03433329	ASIC2	chr17	-5.44359	0.335593	1.1e-24	1.38e-23	2106599	Negative	protein_coding	-139192	Distal non-target gene eQTMs
ENSG00000271447	cg03433329	MMP28	chr17	-3.8121	0.27275	2.75e-18	1.76e-17	-636563	Negative	protein_coding	-139192	Distal non-target gene eQTMs
ENSG00000270885	cg03433329	RASL10B	chr17	-12.3244	1.10503	1.07e-13	4.32e-13	611963	Negative	protein_coding	-139192	Distal non-target gene eQTMs
ENSG00000075702	cg26613140	WDR62	chr19	-32.7599	5.37056	5.61e-05	9.96e-05	-611993	Negative	protein_coding	-138214	Distal non-target gene eQTMs
ENSG00000162591	cg19359929	MEGF6	chr1	-16.3845	1.32074	4.36e-14	1.83e-13	137248	Negative	protein_coding	-137953	Distal non-target gene eQTMs
ENSG00000142611	cg19359929	PRDM16	chr1	-0.83114	0.0975294	2.55e-06	5.17e-06	-556031	Negative	protein_coding	-137953	Distal non-target gene eQTMs
ENSG00000166313	cg19502932	APBB1	chr11	50.3125	3.85487	2.91e-20	2.27e-19	224308	Positive	protein_coding	-137953	Distal non-target gene eQTMs
ENSG00000170049	cg21845633	KCNAB3	chr17	-13.6221	2.03442	3.75e-06	7.47e-06	-66973	Positive	protein_coding	-137532	Distal non-target gene eQTMs
ENSG00000161960	cg21845633	EIF4A1	chr17	47.762	7.43904	0.00590914	0.00843168	-282180	Positive	protein_coding	-137532	Distal non-target gene eQTMs
ENSG00000114124	cg09459719	GRK7	chr3	-5.73531	0.47828	5.64e-19	3.85e-18	-97535	Positive	protein_coding	-137479	Distal non-target gene eQTMs
ENSG00000036530	cg22278183	CYP46A1	chr14	-4.05538	0.46572	4.9e-10	1.41e-09	-691402	Negative	protein_coding	-137408	Distal non-target gene eQTMs
ENSG00000053747	cg01494271	LAMA3	chr18	-2.71372	0.244846	8.72e-16	4.35e-15	-429778	Positive	protein_coding	-136665	Distal non-target gene eQTMs
ENSG00000172216	cg07053599	CEBPB	chr20	5.56861	1.26998	0.0344834	0.0444128	-740706	Positive	protein_coding	-136546	Distal non-target gene eQTMs
ENSG00000273619	cg07915635	RP5-908M14.9	chr20	-0.782093	0.0687952	4.79e-14	2.01e-13	177563	Negative	antisense	-136039	Distal non-target gene eQTMs
ENSG00000276293	cg14685990	PIP4K2B	chr17	21.5163	4.92973	0.0160477	0.0215988	988958	Positive	protein_coding	-135034	Distal non-target gene eQTMs
ENSG00000134248	cg10174611	LAMTOR5	chr1	-11.9709	0.712226	5.85e-28	1.05e-26	364984	Negative	protein_coding	-134759	Distal non-target gene eQTMs
ENSG00000064703	cg10174611	DDX20	chr1	-5.23059	0.4164	1.43e-18	9.38e-18	989012	Positive	protein_coding	-134759	Distal non-target gene eQTMs
ENSG00000116459	cg10174611	ATP5F1	chr1	-11.9558	1.08959	1.51e-15	7.35e-15	682631	Negative	protein_coding	-134759	Distal non-target gene eQTMs
ENSG00000143110	cg11379503	C1orf162	chr1	-1.68075	0.195584	2.49e-10	7.32e-10	707621	Negative	protein_coding	-134697	Distal non-target gene eQTMs
ENSG00000073605	cg25008494	GSDMB	chr17	-6.08655	0.57879	3.79e-14	1.6e-13	-150320	Positive	protein_coding	-134662	Distal non-target gene eQTMs
ENSG00000138463	cg22620680	DIRC2	chr3	-2.50093	0.338617	8.15e-07	1.73e-06	-406598	Positive	protein_coding	-134605	Distal non-target gene eQTMs
ENSG00000246100	cg16476128	LINC00900	chr11	0.404585	0.0527322	3.23e-08	7.86e-08	-115340	Negative	lincRNA	-133592	Distal non-target gene eQTMs
ENSG00000244270	cg14131985	RPL32P29	chr14	0.458619	0.0970624	0.0155923	0.021023	191248	Positive	processed_pseudogene	-133410	Distal non-target gene eQTMs
ENSG00000144935	cg20259256	TRPC1	chr3	-28.2126	2.1159	5.9e-22	5.5e-21	-390	Positive	protein_coding	-132633	Distal non-target gene eQTMs
ENSG00000114125	cg20259256	RNF7	chr3	-6.69245	0.479866	1.15e-20	9.36e-20	-986175	Negative	protein_coding	-132633	Distal non-target gene eQTMs
ENSG00000175066	cg20259256	GK5	chr3	-16.5546	1.43744	1.2e-15	5.9e-15	566897	Negative	protein_coding	-132633	Distal non-target gene eQTMs
ENSG00000099617	cg02359186	EFNA2	chr19	-1.15587	0.0750002	3.37e-17	1.92e-16	-122125	Negative	protein_coding	-132560	Distal non-target gene eQTMs
ENSG00000115084	cg18477962	SLC35F5	chr2	-13.696	1.25188	1.93e-15	9.27e-15	-983438	Negative	protein_coding	-132533	Distal non-target gene eQTMs
ENSG00000166562	cg14230320	SEC11C	chr18	10.1198	1.02341	5.08e-10	1.46e-09	378458	Positive	protein_coding	-132451	Distal non-target gene eQTMs
ENSG00000166407	cg25363151	LMO1	chr11	1.77504	0.115813	2.34e-23	2.54e-22	586577	Negative	protein_coding	-131797	Distal non-target gene eQTMs
ENSG00000185716	cg19593572	C16orf52	chr16	12.7987	2.22305	6.11e-05	0.00010817	-289527	Negative	protein_coding	-131582	Distal non-target gene eQTMs
ENSG00000185864	cg19593572	NPIPB4	chr16	-11.4744	2.13842	0.0012183	0.00188168	462596	Negative	protein_coding	-131582	Distal non-target gene eQTMs
ENSG00000166452	cg11945096	AKIP1	chr11	2.57455	0.52121	0.00678017	0.00959432	809481	Positive	protein_coding	-131407	Distal non-target gene eQTMs
ENSG00000172974	cg02205099	AC007318.5	chr2	0.251814	0.0355326	3.59e-07	7.9e-07	17693	Positive	processed_pseudogene	-131049	Distal non-target gene eQTMs
ENSG00000120690	cg05073845	ELF1	chr13	1.94455	0.327991	0.00035763	0.00058551	-265545	Positive	protein_coding	-130572	Distal non-target gene eQTMs
ENSG00000108352	cg21499137	RAPGEFL1	chr17	-6.23297	1.33534	0.0128241	0.0174825	-240963	Negative	protein_coding	-130340	Distal non-target gene eQTMs
ENSG00000006611	cg21045841	USH1C	chr11	-15.5152	2.203	2.14e-05	3.96e-05	-285919	Negative	protein_coding	-130189	Distal non-target gene eQTMs
ENSG00000184908	cg23269169	CLCNKB	chr1	-3.44382	0.34826	1.2e-11	4e-11	-323448	Negative	protein_coding	-130022	Distal non-target gene eQTMs
ENSG00000169393	cg25939742	ELSPBP1	chr19	8.65223	1.60363	0.00085607	0.00134514	751520	Positive	protein_coding	-129838	Distal non-target gene eQTMs
ENSG00000125107	cg18633178	CNOT1	chr16	84.6225	8.8833	6.46e-12	2.2e-11	-390652	Positive	protein_coding	-129753	Distal non-target gene eQTMs
ENSG00000125170	cg18633178	DOK4	chr16	-10.6936	1.10637	3.08e-11	9.84e-11	657377	Negative	protein_coding	-129753	Distal non-target gene eQTMs
ENSG00000140859	cg06478814	KIFC3	chr16	-130.128	16.7326	2.22e-08	5.48e-08	371080	Positive	protein_coding	-129751	Distal non-target gene eQTMs
ENSG00000150907	cg17912633	FOXO1	chr13	-4.27336	0.66862	1.73e-05	3.24e-05	195522	Negative	protein_coding	-129668	Distal non-target gene eQTMs
ENSG00000105321	cg06701796	CCDC9	chr19	-11.9296	0.530811	2.12e-37	1.27e-35	13655	Positive	protein_coding	-129051	Distal non-target gene eQTMs
ENSG00000090372	cg06701796	STRN4	chr19	-15.5352	0.818528	5.84e-33	1.87e-31	522814	Negative	protein_coding	-129051	Distal non-target gene eQTMs
ENSG00000130751	cg06701796	NPAS1	chr19	-1.17862	0.0797498	6.85e-22	6.33e-21	-222505	Positive	protein_coding	-129051	Distal non-target gene eQTMs
ENSG00000134815	cg06701796	DHX34	chr19	-6.45601	0.501745	1.73e-18	1.13e-17	106990	Positive	protein_coding	-129051	Distal non-target gene eQTMs
ENSG00000182541	cg18894782	LIMK2	chr22	10.4295	1.20929	4.46e-10	1.28e-09	389741	Positive	protein_coding	-128716	Distal non-target gene eQTMs
ENSG00000105373	cg01094301	GLTSCR2	chr19	-48.7196	2.00428	4.32e-43	5.4e-41	503591	Negative	protein_coding	-128681	Distal non-target gene eQTMs
ENSG00000130749	cg01094301	ZC3H4	chr19	-20.7617	0.901713	1.83e-40	1.63e-38	177768	Negative	protein_coding	-128681	Distal non-target gene eQTMs
ENSG00000063169	cg01094301	GLTSCR1	chr19	-8.22025	0.338579	2.26e-40	1.94e-38	366241	Positive	protein_coding	-128681	Distal non-target gene eQTMs
ENSG00000204851	cg01094301	PNMAL2	chr19	-13.0186	0.540354	9.33e-40	7.45e-38	755049	Positive	protein_coding	-128681	Distal non-target gene eQTMs
ENSG00000185453	cg01094301	C19orf68	chr19	-3.73022	0.169715	2.27e-37	1.35e-35	928725	Positive	protein_coding	-128681	Distal non-target gene eQTMs
ENSG00000130748	cg01094301	TMEM160	chr19	-1.66723	0.0762181	2.77e-35	1.26e-33	196046	Positive	protein_coding	-128681	Distal non-target gene eQTMs
ENSG00000160007	cg01094301	ARHGAP35	chr19	-32.7349	2.27215	4.79e-21	4.03e-20	-323279	Negative	protein_coding	-128681	Distal non-target gene eQTMs
ENSG00000011485	cg01094301	PPP5C	chr19	-11.675	0.865595	1.84e-19	1.32e-18	-894961	Positive	protein_coding	-128681	Distal non-target gene eQTMs
ENSG00000237440	cg07899459	ZNF737	chr19	-4.94277	0.513734	1.38e-13	5.52e-13	-891598	Negative	protein_coding	-128000	Distal non-target gene eQTMs
ENSG00000203877	cg22280359	RIPPLY2	chr6	3.10885	0.345471	8.54e-10	2.4e-09	659426	Positive	protein_coding	-127999	Distal non-target gene eQTMs
ENSG00000142192	cg13149304	APP	chr21	-155.558	26.819	6.32e-05	0.00011177	-145378	Positive	protein_coding	-127655	Distal non-target gene eQTMs
ENSG00000151881	cg16986441	TMEM267	chr5	1.3672	0.301184	0.00767605	0.0107856	-251480	Negative	protein_coding	-127596	Distal non-target gene eQTMs
ENSG00000005700	cg07963725	IBTK	chr6	20.1407	2.06465	3.76e-13	1.45e-12	1023234	Positive	protein_coding	-127379	Distal non-target gene eQTMs
ENSG00000183530	cg10382346	PRR14L	chr22	8.92437	0.924838	4.54e-12	1.57e-11	-913362	Positive	protein_coding	-127242	Distal non-target gene eQTMs
ENSG00000137942	cg12720424	FNBP1L	chr1	19.585	1.96453	3.05e-12	1.07e-11	-799542	Positive	protein_coding	-126541	Distal non-target gene eQTMs
ENSG00000159648	cg01144609	TEPP	chr16	-0.308517	0.0418053	1.93e-06	3.96e-06	-149622	Negative	protein_coding	-126511	Distal non-target gene eQTMs
ENSG00000132507	cg13169780	EIF5A	chr17	-80.7479	4.10037	9.23e-33	2.85e-31	-381253	Negative	protein_coding	-126377	Distal non-target gene eQTMs
ENSG00000174326	cg13169780	SLC16A11	chr17	-2.30025	0.174049	7.66e-15	3.47e-14	646622	Negative	protein_coding	-126377	Distal non-target gene eQTMs
ENSG00000197980	cg01843367	LEKR1	chr3	0.825378	0.127221	4.87e-06	9.6e-06	954195	Positive	protein_coding	-126219	Distal non-target gene eQTMs
ENSG00000280069	cg22113926	CTD-2349P21.3	chr17	-0.788107	0.0930259	2.68e-09	7.21e-09	498869	Negative	TEC	-123792	Distal non-target gene eQTMs
ENSG00000169247	cg25922157	SH3TC2	chr5	-15.4112	2.60827	3.77e-05	6.82e-05	341099	Negative	protein_coding	-123255	Distal non-target gene eQTMs
ENSG00000117632	cg14017991	STMN1	chr1	90.6109	6.31871	3.96e-24	4.71e-23	350108	Negative	protein_coding	-123124	Distal non-target gene eQTMs
ENSG00000158062	cg14017991	UBXN11	chr1	-25.7109	3.31996	4.73e-08	1.13e-07	-47039	Negative	protein_coding	-123124	Distal non-target gene eQTMs
ENSG00000103994	cg15021670	ZNF106	chr15	32.8032	4.81089	3.54e-06	7.06e-06	-318295	Positive	protein_coding	-121950	Distal non-target gene eQTMs
ENSG00000272884	cg00458274	RP11-104H15.10	chr17	-1.21306	0.220315	0.00223588	0.00335601	-567216	Negative	processed_transcript	-121484	Distal non-target gene eQTMs
ENSG00000256664	cg05085337	RP11-611O2.3	chr12	1.07265	0.163277	4.97e-06	9.79e-06	33954	Positive	processed_pseudogene	-121258	Distal non-target gene eQTMs
ENSG00000225177	cg16273175	RP11-390P2.4	chr6	0.841017	0.0969527	1.67e-07	3.8e-07	576425	Positive	antisense	-120853	Distal non-target gene eQTMs
ENSG00000100348	cg02452950	TXN2	chr22	-9.46273	1.22471	1.06e-08	2.69e-08	-180072	Negative	protein_coding	-120797	Distal non-target gene eQTMs
ENSG00000136108	cg06771610	CKAP2	chr13	-5.56567	0.875334	6.33e-06	1.24e-05	814	Negative	protein_coding	-120320	Distal non-target gene eQTMs
ENSG00000161036	cg18882624	LRWD1	chr7	-6.06917	0.417846	4.98e-23	5.23e-22	528969	Negative	protein_coding	-120083	Distal non-target gene eQTMs
ENSG00000160993	cg18882624	ALKBH4	chr7	-1.53754	0.142342	1.08e-14	4.83e-14	-520251	Positive	protein_coding	-120083	Distal non-target gene eQTMs
ENSG00000175727	cg18790814	MLXIP	chr12	-23.5971	5.23596	0.0251209	0.0329846	-674164	Negative	protein_coding	-118790	Distal non-target gene eQTMs
ENSG00000089053	cg16021483	ANAPC5	chr12	23.7221	1.50653	2.59e-26	3.91e-25	-861910	Positive	protein_coding	-118546	Distal non-target gene eQTMs
ENSG00000088986	cg16021483	DYNLL1	chr12	30.4516	2.40128	2.82e-17	1.62e-16	23515	Negative	protein_coding	-118546	Distal non-target gene eQTMs
ENSG00000167272	cg16021483	POP5	chr12	2.94054	0.336987	1.03e-09	2.88e-09	-132429	Negative	protein_coding	-118546	Distal non-target gene eQTMs
ENSG00000283580	cg24483304	RP5-994D16.12	chr1	1.00867	0.0366901	1.67e-46	4.13e-44	-622159	Positive	protein_coding	-118515	Distal non-target gene eQTMs
ENSG00000229444	cg24483304	RP11-184I16.4	chr1	-2.67133	0.232669	7.71e-17	4.25e-16	-319941	Negative	antisense	-118515	Distal non-target gene eQTMs
ENSG00000188825	cg27576485	LINC00910	chr17	-0.672389	0.0757481	2.9e-06	5.84e-06	-932696	Negative	lincRNA	-118498	Distal non-target gene eQTMs
ENSG00000186174	cg13191328	BCL9L	chr11	12.5336	0.683225	3.66e-31	9.42e-30	-946788	Negative	protein_coding	-118389	Distal non-target gene eQTMs
ENSG00000167283	cg13191328	ATP5L	chr11	-11.7687	0.743324	3.91e-24	4.65e-23	454519	Negative	protein_coding	-118389	Distal non-target gene eQTMs
ENSG00000118058	cg13191328	KMT2A	chr11	-38.522	4.18749	4.69e-11	1.48e-10	489377	Positive	protein_coding	-118389	Distal non-target gene eQTMs
ENSG00000002746	cg00369116	HECW1	chr7	2.12605	0.174083	1.01e-16	5.51e-16	-588246	Positive	protein_coding	-118117	Distal non-target gene eQTMs
ENSG00000161682	cg24795046	FAM171A2	chr17	-9.92413	0.584556	4.48e-26	6.59e-25	-37266	Positive	protein_coding	-117067	Distal non-target gene eQTMs
ENSG00000108312	cg24795046	UBTF	chr17	-19.1387	1.28226	2.81e-23	3.02e-22	110916	Positive	protein_coding	-117067	Distal non-target gene eQTMs
ENSG00000168517	cg24795046	HEXIM2	chr17	-1.40728	0.109499	2.77e-18	1.77e-17	844751	Negative	protein_coding	-117067	Distal non-target gene eQTMs
ENSG00000091947	cg24795046	TMEM101	chr17	-1.04206	0.153301	2.78e-06	5.61e-06	304761	Negative	protein_coding	-117067	Distal non-target gene eQTMs
ENSG00000203880	cg23854747	PCMTD2	chr20	-233.584	23.8801	2.43e-12	8.62e-12	274343	Positive	protein_coding	-117059	Distal non-target gene eQTMs
ENSG00000237927	cg10002569	RP3-393E18.2	chr6	-0.363778	0.0712933	0.0022894	0.003434	-482639	Negative	lincRNA	-116138	Distal non-target gene eQTMs
ENSG00000125826	cg15265675	RBCK1	chr20	-13.9031	1.35861	1.65e-13	6.56e-13	-55160	Positive	protein_coding	-115876	Distal non-target gene eQTMs
ENSG00000101298	cg15265675	SNPH	chr20	-26.567	2.87906	5.72e-12	1.96e-11	803622	Negative	protein_coding	-115876	Distal non-target gene eQTMs
ENSG00000125775	cg15265675	SDCBP2	chr20	-0.377797	0.0657484	0.0001259	0.00021553	-847251	Negative	protein_coding	-115876	Distal non-target gene eQTMs
ENSG00000279948	cg24696028	CTD-2233K9.1	chr19	-0.0959913	0.0191714	0.0066511	0.00942075	-281922	Negative	TEC	-115183	Distal non-target gene eQTMs
ENSG00000114391	cg02881434	RPL24	chr3	-43.8607	2.66986	7.62e-29	1.52e-27	-5015	Negative	protein_coding	-114214	Distal non-target gene eQTMs
ENSG00000186301	cg13612241	MST1P2	chr1	-1.6353	0.187051	1.37e-10	4.13e-10	-587545	Negative	unprocessed_pseudogene	-113732	Distal non-target gene eQTMs
ENSG00000100836	cg20576264	PABPN1	chr14	-48.2674	6.44311	0.00015087	0.00025593	278496	Negative	protein_coding	-113184	Distal non-target gene eQTMs
ENSG00000171160	cg06636246	MORN4	chr10	5.76309	0.575551	6.36e-13	2.4e-12	-781063	Positive	protein_coding	-112976	Distal non-target gene eQTMs
ENSG00000111012	cg23501240	CYP27B1	chr12	3.70073	0.481313	1.59e-07	3.62e-07	-521648	Positive	protein_coding	-112193	Distal non-target gene eQTMs
ENSG00000196531	cg23240961	NACA	chr12	64.6946	4.22012	5.05e-25	6.6e-24	528199	Positive	protein_coding	-112134	Distal non-target gene eQTMs
ENSG00000259132	cg09857247	RP11-298I3.5	chr14	-1.60191	0.304974	0.00342195	0.00502639	95455	Negative	protein_coding	-112116	Distal non-target gene eQTMs
ENSG00000114019	cg08754625	AMOTL2	chr3	13.2304	2.37528	0.0002118	0.00035438	-459920	Positive	protein_coding	-111921	Distal non-target gene eQTMs
ENSG00000123352	cg19621317	SPATS2	chr12	2.61778	0.513293	0.00188828	0.00285943	-706911	Positive	protein_coding	-111625	Distal non-target gene eQTMs
ENSG00000169021	cg20643362	UQCRFS1	chr19	17.7365	1.07799	2.91e-30	6.77e-29	510142	Negative	protein_coding	-111445	Distal non-target gene eQTMs
ENSG00000166289	cg20643362	PLEKHF1	chr19	-0.7599	0.0596902	4.07e-18	2.56e-17	-50003	Positive	protein_coding	-111445	Distal non-target gene eQTMs
ENSG00000280061	cg20643362	CTD-2001J20.1	chr19	1.7161	0.33752	0.00119054	0.00184205	838494	Positive	TEC	-111445	Distal non-target gene eQTMs
ENSG00000157895	cg16106678	C12orf43	chr12	3.04393	0.317484	2.97e-12	1.05e-11	-562079	Positive	protein_coding	-110618	Distal non-target gene eQTMs
ENSG00000125731	cg23477380	SH2D3A	chr19	-0.731792	0.0988853	6.18e-07	1.33e-06	-850903	Negative	protein_coding	-110019	Distal non-target gene eQTMs
ENSG00000089163	cg08482700	SIRT4	chr12	-1.07508	0.111783	2.99e-13	1.16e-12	-135481	Negative	protein_coding	-110008	Distal non-target gene eQTMs
ENSG00000168781	cg24968576	PPIP5K1	chr15	53.6574	4.72213	1.23e-16	6.64e-16	1003640	Positive	protein_coding	-109958	Distal non-target gene eQTMs
ENSG00000104133	cg20315629	SPG11	chr15	12.8964	1.72984	3.79e-08	9.17e-08	-25626	Positive	protein_coding	-109926	Distal non-target gene eQTMs
ENSG00000110911	cg00973334	SLC11A2	chr12	19.2499	1.87894	4.2e-13	1.61e-12	-812162	Positive	protein_coding	-109691	Distal non-target gene eQTMs
ENSG00000242028	cg02788597	HYPK	chr15	-6.2814	0.727419	8.79e-11	2.69e-10	-740568	Negative	protein_coding	-109566	Distal non-target gene eQTMs
ENSG00000167004	cg06070291	PDIA3	chr15	-24.7893	3.94741	0.00026413	0.00043797	-790291	Positive	protein_coding	-109557	Distal non-target gene eQTMs
ENSG00000140264	cg05854349	SERF2	chr15	-45.8188	9.83037	0.00458414	0.00663261	-759605	Negative	protein_coding	-109548	Distal non-target gene eQTMs
ENSG00000254692	cg04260516	RP11-468E2.1	chr14	-8.05061	0.291281	1.06e-50	5.32e-48	-28039	Negative	protein_coding	-109118	Distal non-target gene eQTMs
ENSG00000148572	cg12489773	NRBF2	chr10	1.41469	0.292008	0.00198372	0.00299544	-497256	Positive	protein_coding	-108653	Distal non-target gene eQTMs
ENSG00000170473	cg25245322	PYM1	chr12	2.18203	0.341376	9.61e-06	1.85e-05	322999	Positive	protein_coding	-107826	Distal non-target gene eQTMs
ENSG00000156976	cg04650961	EIF4A2	chr3	-86.093	7.82692	8.32e-15	3.76e-14	850928	Positive	protein_coding	-107221	Distal non-target gene eQTMs
ENSG00000136110	cg11252372	LECT1	chr13	2.24743	0.370014	0.00021431	0.00035841	-584538	Positive	protein_coding	-106601	Distal non-target gene eQTMs
ENSG00000117614	cg16583560	SYF2	chr1	7.01241	1.58848	0.015941	0.0214668	790895	Positive	protein_coding	-106180	Distal non-target gene eQTMs
ENSG00000007047	cg19686301	MARK4	chr19	-27.5153	1.42213	3.86e-31	9.9e-30	-505612	Positive	protein_coding	-106072	Distal non-target gene eQTMs
ENSG00000073008	cg19686301	PVR	chr19	-4.33647	0.308603	1.04e-21	9.41e-21	-941102	Negative	protein_coding	-106072	Distal non-target gene eQTMs
ENSG00000104967	cg19686301	NOVA2	chr19	-8.22012	0.664996	3.13e-17	1.79e-16	-348834	Negative	protein_coding	-106072	Distal non-target gene eQTMs
ENSG00000117877	cg01990304	CD3EAP	chr19	-1.65606	0.122577	1.23e-20	9.99e-20	-178543	Positive	protein_coding	-105924	Distal non-target gene eQTMs
ENSG00000130204	cg01990304	TOMM40	chr19	-17.6166	1.45916	1.29e-17	7.73e-17	-694183	Negative	protein_coding	-105924	Distal non-target gene eQTMs
ENSG00000174282	cg27380288	ZBTB4	chr17	-33.4251	3.07822	1.49e-13	5.94e-13	531017	Negative	protein_coding	-105577	Distal non-target gene eQTMs
ENSG00000187838	cg27380288	TMEM256-PLSCR3	chr17	-1.41552	0.13749	3.85e-13	1.48e-12	600656	Negative	protein_coding	-105577	Distal non-target gene eQTMs
ENSG00000170037	cg27380288	CNTROB	chr17	-3.84133	0.667537	0.00019317	0.00032438	-58282	Negative	protein_coding	-105577	Distal non-target gene eQTMs
ENSG00000223802	cg26112243	CERS1	chr19	-6.43108	0.600381	5.4e-12	1.85e-11	270075	Negative	protein_coding	-105045	Distal non-target gene eQTMs
ENSG00000064607	cg07817697	SUGP2	chr19	-45.247	4.85832	4.08e-11	1.29e-10	147712	Negative	protein_coding	-105025	Distal non-target gene eQTMs
ENSG00000196912	cg21258705	ANKRD36B	chr2	8.76627	1.11443	2.23e-08	5.5e-08	-529971	Positive	protein_coding	-104758	Distal non-target gene eQTMs
ENSG00000198429	cg06382294	ZNF69	chr19	-0.499937	0.0629423	1.96e-07	4.43e-07	-953398	Negative	protein_coding	-104043	Distal non-target gene eQTMs
ENSG00000099968	cg05135549	BCL2L13	chr22	20.2821	4.11244	0.00205881	0.00310349	258106	Positive	protein_coding	-104016	Distal non-target gene eQTMs
ENSG00000111640	cg13434714	GAPDH	chr12	959.837	200.397	0.00575827	0.00822509	-293110	Negative	protein_coding	-103881	Distal non-target gene eQTMs
ENSG00000176209	cg26243740	SMIM19	chr8	1.1629	0.201104	9.82e-05	0.0001703	386160	Positive	protein_coding	-103005	Distal non-target gene eQTMs
ENSG00000144161	cg27310163	ZC3H8	chr2	4.20682	0.463686	2.91e-11	9.32e-11	373135	Positive	protein_coding	-102510	Distal non-target gene eQTMs
ENSG00000111602	cg01167556	TIMELESS	chr12	-10.8431	1.62351	6.25e-06	1.22e-05	-486508	Negative	protein_coding	-102309	Distal non-target gene eQTMs
ENSG00000119227	cg02561820	PIGZ	chr3	-2.04172	0.343954	4.58e-05	8.2e-05	-762589	Negative	protein_coding	-101578	Distal non-target gene eQTMs
ENSG00000136144	cg12684360	RCBTB1	chr13	43.5554	3.3575	8.63e-20	6.44e-19	260975	Positive	protein_coding	-101446	Distal non-target gene eQTMs
ENSG00000102753	cg12684360	KPNA3	chr13	23.5236	2.501	1.05e-11	3.52e-11	93601	Positive	protein_coding	-101446	Distal non-target gene eQTMs
ENSG00000114698	cg03839477	PLSCR4	chr3	-10.9444	2.78397	0.0184142	0.024549	-26906	Negative	protein_coding	-101387	Distal non-target gene eQTMs
ENSG00000104368	cg16060664	PLAT	chr8	-3.65758	0.516529	5.78e-06	1.13e-05	-21885	Negative	protein_coding	-101358	Distal non-target gene eQTMs
ENSG00000180304	cg06130371	OAZ2	chr15	40.9263	4.88372	3.86e-09	1.02e-08	598919	Positive	protein_coding	-101150	Distal non-target gene eQTMs
ENSG00000231770	cg14461291	TMEM44-AS1	chr3	-1.22264	0.252406	0.00887629	0.0123683	-15284	Negative	antisense	-100924	Distal non-target gene eQTMs
ENSG00000173933	cg20730587	RBM4	chr11	12.9639	2.92336	0.0307249	0.0398369	-581115	Positive	protein_coding	-100463	Distal non-target gene eQTMs
ENSG00000160959	cg02837279	LRRC14	chr8	5.94735	0.294682	2.81e-34	1.12e-32	-484292	Positive	protein_coding	-100116	Distal non-target gene eQTMs
ENSG00000197858	cg02837279	GPAA1	chr8	23.559	1.29276	2.93e-29	6.06e-28	-919694	Negative	protein_coding	-100116	Distal non-target gene eQTMs
ENSG00000161016	cg02837279	RPL8	chr8	90.483	7.19885	1e-18	6.66e-18	212519	Positive	protein_coding	-100116	Distal non-target gene eQTMs
ENSG00000135441	cg22515710	BLOC1S1	chr12	-12.9536	1.53264	1.84e-09	5.03e-09	-211599	Negative	protein_coding	-100090	Distal non-target gene eQTMs
ENSG00000123307	cg22515710	NEUROD4	chr12	26.5983	4.56538	8.36e-05	0.00014605	-907662	Negative	protein_coding	-100090	Distal non-target gene eQTMs
ENSG00000166685	cg06563943	COG1	chr17	-7.74254	1.41618	0.000197	0.0003305	500	Negative	protein_coding	-99420	Distal non-target gene eQTMs
ENSG00000101470	cg06670911	TNNC2	chr20	1.53242	0.16779	5.45e-08	1.3e-07	68105	Positive	protein_coding	-99382	Distal non-target gene eQTMs
ENSG00000269834	cg02573825	ZNF528-AS1	chr19	-2.21307	0.440926	0.00159216	0.0024307	-402037	Negative	processed_transcript	-98829	Distal non-target gene eQTMs
ENSG00000167766	cg16018211	ZNF83	chr19	-54.9669	3.37288	1.82e-27	3.14e-26	-607484	Negative	protein_coding	-98600	Distal non-target gene eQTMs
ENSG00000167555	cg24162630	ZNF528	chr19	-12.4314	0.731122	1.72e-28	3.29e-27	411319	Positive	protein_coding	-98554	Distal non-target gene eQTMs
ENSG00000140463	cg19736276	BBS4	chr15	24.7111	1.7672	1.86e-22	1.84e-21	211725	Negative	protein_coding	-98473	Distal non-target gene eQTMs
ENSG00000260339	cg19736276	HEXA-AS1	chr15	0.4452	0.0496966	1.35e-10	4.07e-10	-98341	Positive	antisense	-98473	Distal non-target gene eQTMs
ENSG00000138622	cg03945322	HCN4	chr15	-2.33447	0.275631	6.1e-08	1.44e-07	-845591	Negative	protein_coding	-98287	Distal non-target gene eQTMs
ENSG00000158691	cg14516246	ZSCAN12	chr6	-7.32938	0.653471	1.27e-15	6.23e-15	-906109	Positive	protein_coding	-98231	Distal non-target gene eQTMs
ENSG00000198315	cg14516246	ZKSCAN8	chr6	-29.5612	3.67319	1.36e-08	3.42e-08	669037	Negative	protein_coding	-98231	Distal non-target gene eQTMs
ENSG00000106404	cg00418469	CLDN15	chr7	-6.27739	1.34116	0.00819236	0.0114753	20431	Negative	protein_coding	-98126	Distal non-target gene eQTMs
ENSG00000100926	cg05164916	TM9SF1	chr14	6.31787	0.304601	6.36e-34	2.39e-32	-621630	Positive	protein_coding	-97831	Distal non-target gene eQTMs
ENSG00000163945	cg13904018	UVSSA	chr4	-10.917	0.641168	1.52e-27	2.64e-26	168	Negative	protein_coding	-97798	Distal non-target gene eQTMs
ENSG00000169020	cg13904018	ATP5I	chr4	12.7406	0.963793	1.56e-19	1.13e-18	674662	Negative	protein_coding	-97798	Distal non-target gene eQTMs
ENSG00000139767	cg13099106	SRRM4	chr12	-34.5355	2.09874	1.62e-29	3.44e-28	-1105827	Negative	protein_coding	-97499	Distal non-target gene eQTMs
ENSG00000213144	cg00168205	RP11-64B16.2	chr12	-0.911163	0.206789	0.00865908	0.0120828	-892278	Negative	processed_pseudogene	-97259	Distal non-target gene eQTMs
ENSG00000124562	cg27413165	SNRPC	chr6	-4.19445	0.642922	8.11e-06	1.57e-05	-681956	Negative	protein_coding	-96903	Distal non-target gene eQTMs
ENSG00000272145	cg25275331	NFYC-AS1	chr1	-1.61451	0.0861589	1.66e-33	5.85e-32	-432117	Positive	antisense	-96890	Distal non-target gene eQTMs
ENSG00000187801	cg25275331	ZFP69B	chr1	-0.425997	0.0459137	2.38e-11	7.71e-11	191839	Negative	protein_coding	-96890	Distal non-target gene eQTMs
ENSG00000185432	cg00996690	METTL7A	chr12	21.9862	1.88706	5.56e-16	2.82e-15	866160	Positive	protein_coding	-95442	Distal non-target gene eQTMs
ENSG00000135469	cg21497669	COQ10A	chr12	-4.80314	0.344922	2.97e-21	2.56e-20	-916248	Negative	protein_coding	-95043	Distal non-target gene eQTMs
ENSG00000166908	cg21497669	PIP4K2C	chr12	-6.89035	0.593988	3.55e-17	2.02e-16	408068	Negative	protein_coding	-95043	Distal non-target gene eQTMs
ENSG00000261051	cg22234419	RP11-274H2.5	chr3	-5.79745	0.849338	5.02e-07	1.09e-06	98535	Negative	sense_overlapping	-94078	Distal non-target gene eQTMs
ENSG00000240032	cg22234419	RP11-274H2.3	chr3	-0.612427	0.0952375	1.78e-05	3.33e-05	91776	Negative	antisense	-94078	Distal non-target gene eQTMs
ENSG00000273604	cg24724583	C17orf96	chr17	-3.17431	0.418656	5.34e-06	1.05e-05	479357	Negative	protein_coding	-94041	Distal non-target gene eQTMs
ENSG00000087087	cg14227687	SRRT	chr7	-38.7249	3.40968	2.62e-15	1.25e-14	168991	Negative	protein_coding	-94010	Distal non-target gene eQTMs
ENSG00000185246	cg00346286	PRPF39	chr14	-21.4487	1.36094	1.56e-28	3.01e-27	-51036	Negative	protein_coding	-92813	Distal non-target gene eQTMs
ENSG00000198718	cg00346286	FAM179B	chr14	-11.6396	1.08653	5.04e-16	2.56e-15	-172945	Negative	protein_coding	-92813	Distal non-target gene eQTMs
ENSG00000100442	cg00346286	FKBP3	chr14	-14.3419	1.27989	4.7e-15	2.18e-14	19536	Negative	protein_coding	-92813	Distal non-target gene eQTMs
ENSG00000273618	cg05142272	RP11-66N24.7	chr14	-0.605883	0.0808045	4.7e-07	1.02e-06	-896650	Negative	antisense	-92239	Distal non-target gene eQTMs
ENSG00000105732	cg26792749	ZNF574	chr19	9.35497	0.638715	4.88e-23	5.14e-22	758342	Positive	protein_coding	-90932	Distal non-target gene eQTMs
ENSG00000105341	cg26792749	ATP5SL	chr19	7.10831	0.932888	5.45e-08	1.3e-07	-121183	Negative	protein_coding	-90932	Distal non-target gene eQTMs
ENSG00000159788	cg00918862	RGS12	chr4	8.96361	0.680255	3.55e-20	2.74e-19	358476	Positive	protein_coding	-90695	Distal non-target gene eQTMs
ENSG00000087269	cg00918862	NOP14	chr4	1.19633	0.22427	0.0015323	0.00234379	-3381	Negative	protein_coding	-90695	Distal non-target gene eQTMs
ENSG00000022840	cg24865377	RNF10	chr12	-18.0306	3.98983	0.0176776	0.023637	452969	Negative	protein_coding	-90642	Distal non-target gene eQTMs
ENSG00000006831	cg08723793	ADIPOR2	chr12	-12.2887	1.67319	8.48e-07	1.8e-06	935988	Negative	protein_coding	-88807	Distal non-target gene eQTMs
ENSG00000066933	cg03621881	MYO9A	chr15	15.423	1.48915	1.71e-13	6.79e-13	498185	Positive	protein_coding	-88654	Distal non-target gene eQTMs
ENSG00000103657	cg01222408	HERC1	chr15	66.3354	4.91639	1.24e-19	9.1e-19	-330718	Positive	protein_coding	-88431	Distal non-target gene eQTMs
ENSG00000166557	cg02137425	TMED3	chr15	3.41146	0.686047	0.0019926	0.00300755	132190	Positive	protein_coding	-88149	Distal non-target gene eQTMs
ENSG00000169592	cg10854110	INO80E	chr16	-12.9988	2.12566	4.99e-05	8.91e-05	-879420	Positive	protein_coding	-87933	Distal non-target gene eQTMs
ENSG00000138613	cg08638876	APH1B	chr15	10.4139	1.18828	1.66e-09	4.56e-09	-1294	Positive	protein_coding	-87843	Distal non-target gene eQTMs
ENSG00000105983	cg03088741	LMBR1	chr7	10.8659	2.00228	0.00121672	0.0018794	-937328	Positive	protein_coding	-87212	Distal non-target gene eQTMs
ENSG00000103653	cg02299279	CSK	chr15	-24.4766	1.1484	2.63e-37	1.56e-35	320611	Negative	protein_coding	-86768	Distal non-target gene eQTMs
ENSG00000205363	cg02299279	C15orf59	chr15	-34.4438	2.07935	3.72e-24	4.44e-23	726015	Negative	protein_coding	-86768	Distal non-target gene eQTMs
ENSG00000103855	cg02299279	CD276	chr15	-15.7297	1.28365	1.46e-17	8.67e-17	-777480	Positive	protein_coding	-86768	Distal non-target gene eQTMs
ENSG00000167178	cg02299279	ISLR2	chr15	-12.9213	1.21015	2.12e-10	6.28e-10	-361135	Negative	protein_coding	-86768	Distal non-target gene eQTMs
ENSG00000156642	cg02299279	NPTN	chr15	39.1497	4.67299	2.46e-09	6.64e-09	901432	Positive	protein_coding	-86768	Distal non-target gene eQTMs
ENSG00000167173	cg02299279	C15orf39	chr15	-4.93013	0.806239	0.0001089	0.00018784	734197	Positive	protein_coding	-86768	Distal non-target gene eQTMs
ENSG00000140474	cg02299279	ULK3	chr15	-26.9036	4.71829	0.00012776	0.00021856	-374672	Negative	protein_coding	-86768	Distal non-target gene eQTMs
ENSG00000177283	cg26679713	FZD8	chr10	-17.4268	1.68386	3.77e-13	1.45e-12	-424489	Negative	protein_coding	-86740	Distal non-target gene eQTMs
ENSG00000244187	cg01626995	TMEM141	chr9	3.91853	0.450144	1.8e-10	5.36e-10	159779	Negative	protein_coding	-85703	Distal non-target gene eQTMs
ENSG00000067221	cg07149948	STOML1	chr15	-5.44476	0.424054	4.92e-20	3.75e-19	481394	Negative	protein_coding	-85642	Distal non-target gene eQTMs
ENSG00000166770	cg21287936	ZNF667-AS1	chr19	-4.3335	0.765089	0.00026655	0.0004417	-1193	Negative	lincRNA	-84898	Distal non-target gene eQTMs
ENSG00000137098	cg11347475	SPAG8	chr9	-2.41227	0.258776	1.29e-11	4.28e-11	-76558	Negative	protein_coding	-84677	Distal non-target gene eQTMs
ENSG00000154928	cg17775713	EPHB1	chr3	-5.42499	0.703331	8.98e-08	2.09e-07	851176	Negative	protein_coding	-84627	Distal non-target gene eQTMs
ENSG00000147650	cg20426946	LRP12	chr8	-3.67552	0.421031	6.56e-11	2.03e-10	-989683	Negative	protein_coding	-84359	Distal non-target gene eQTMs
ENSG00000155097	cg20426946	ATP6V1C1	chr8	-24.2775	2.90644	1.38e-09	3.81e-09	-478485	Negative	protein_coding	-84359	Distal non-target gene eQTMs
ENSG00000258017	cg20987850	RP11-386G11.10	chr12	0.527914	0.0985553	0.00548701	0.00785999	-87613	Positive	antisense	-83998	Distal non-target gene eQTMs
ENSG00000282458	cg04338055	WASH5P	chr19	-24.9613	3.16995	5.49e-08	1.31e-07	940005	Negative	transcribed_processed_pseudogene	-83669	Distal non-target gene eQTMs
ENSG00000079459	cg24861394	FDFT1	chr8	-27.5876	4.96137	0.0006446	0.00102701	511211	Negative	protein_coding	-82996	Distal non-target gene eQTMs
ENSG00000120265	cg23518220	PCMT1	chr6	17.6924	1.37648	1.69e-19	1.22e-18	100553	Negative	protein_coding	-82596	Distal non-target gene eQTMs
ENSG00000092098	cg18598152	RNF31	chr14	-14.0027	1.71164	1.16e-09	3.22e-09	594935	Negative	protein_coding	-82060	Distal non-target gene eQTMs
ENSG00000186648	cg18598152	CARMIL3	chr14	-12.6568	1.6193	0.00023495	0.0003917	500261	Negative	protein_coding	-82060	Distal non-target gene eQTMs
ENSG00000134532	cg22408544	SOX5	chr12	2.15047	0.409149	0.00057025	0.00091377	-903681	Positive	protein_coding	-81277	Distal non-target gene eQTMs
ENSG00000100813	cg11723850	ACIN1	chr14	21.9328	2.82528	5.99e-09	1.56e-08	492280	Negative	protein_coding	-81156	Distal non-target gene eQTMs
ENSG00000124104	cg07007080	SNX21	chr20	4.5025	0.635148	1.4e-06	2.91e-06	-256072	Positive	protein_coding	-80963	Distal non-target gene eQTMs
ENSG00000275964	cg06339974	RP11-61K9.3	chr13	0.734525	0.0521741	1.37e-19	9.99e-19	49	Negative	lincRNA	-80790	Distal non-target gene eQTMs
ENSG00000196199	cg18710692	MPHOSPH8	chr13	9.21078	1.32663	9.56e-07	2.02e-06	-229913	Positive	protein_coding	-80553	Distal non-target gene eQTMs
ENSG00000167380	cg08578505	ZNF226	chr19	26.5816	1.44386	1.5e-30	3.62e-29	-914593	Negative	protein_coding	-78236	Distal non-target gene eQTMs
ENSG00000185800	cg08578505	DMWD	chr19	-17.8546	1.04777	1.66e-29	3.51e-28	-703281	Negative	protein_coding	-78236	Distal non-target gene eQTMs
ENSG00000104884	cg08578505	ERCC2	chr19	-6.19816	0.570792	5.99e-15	2.74e-14	-270171	Negative	protein_coding	-78236	Distal non-target gene eQTMs
ENSG00000255468	cg04073608	RP11-867G23.8	chr11	1.26485	0.0539781	1.04e-37	6.57e-36	847321	Positive	antisense	-77855	Distal non-target gene eQTMs
ENSG00000091527	cg15241068	CDV3	chr3	32.3075	6.17364	0.0151067	0.0204011	-853290	Positive	protein_coding	-77787	Distal non-target gene eQTMs
ENSG00000275437	cg13251669	RP5-908M14.10	chr20	0.513824	0.104647	0.00540016	0.00774189	-259022	Positive	sense_intronic	-77404	Distal non-target gene eQTMs
ENSG00000255966	cg06444189	RP5-940J5.3	chr12	-0.34976	0.0687067	0.00181225	0.0027514	312286	Negative	antisense	-77101	Distal non-target gene eQTMs
ENSG00000101144	cg00831028	BMP7	chr20	19.0837	3.13161	0.00014009	0.00023856	-700064	Positive	protein_coding	-76352	Distal non-target gene eQTMs
ENSG00000133895	cg18501142	MEN1	chr11	9.00128	0.555255	2e-26	3.06e-25	695580	Positive	protein_coding	-76316	Distal non-target gene eQTMs
ENSG00000173575	cg09680926	CHD2	chr15	-26.3635	2.24593	1.73e-16	9.21e-16	13997	Negative	protein_coding	-76308	Distal non-target gene eQTMs
ENSG00000101146	cg25296815	RAE1	chr20	8.2005	0.63371	2.13e-20	1.68e-19	882732	Positive	protein_coding	-76154	Distal non-target gene eQTMs
ENSG00000270175	cg23834106	RP11-793H13.11	chr12	-0.338794	0.0790036	0.0269392	0.0352589	854983	Positive	antisense	-75012	Distal non-target gene eQTMs
ENSG00000172803	cg12498916	SNX32	chr11	1.54182	0.233771	0.00250264	0.00373663	336160	Positive	protein_coding	-74900	Distal non-target gene eQTMs
ENSG00000179348	cg25699299	GATA2	chr3	0.645242	0.0746209	4.46e-08	1.07e-07	-806647	Positive	protein_coding	-74529	Distal non-target gene eQTMs
ENSG00000280053	cg25699299	RP11-61K12.2	chr3	-0.575826	0.0887232	4.53e-06	8.96e-06	-699715	Negative	TEC	-74529	Distal non-target gene eQTMs
ENSG00000198794	cg14822850	SCAMP5	chr15	217.421	45.1706	0.00518061	0.0074484	341585	Positive	protein_coding	-74457	Distal non-target gene eQTMs
ENSG00000159399	cg19234858	HK2	chr2	914.185	116.308	4.91e-08	1.18e-07	304736	Negative	protein_coding	-74222	Distal non-target gene eQTMs
ENSG00000172530	cg07332757	BANP	chr16	2.64136	0.166142	6.77e-24	7.83e-23	-578272	Positive	protein_coding	-74199	Distal non-target gene eQTMs
ENSG00000079313	cg08298679	REXO1	chr19	-19.7196	0.66679	4.09e-48	1.28e-45	-719871	Negative	protein_coding	-74198	Distal non-target gene eQTMs
ENSG00000111783	cg07128624	RFX4	chr12	-0.436013	0.0882551	0.00700767	0.00990428	-1176882	Negative	protein_coding	-74057	Distal non-target gene eQTMs
ENSG00000161939	cg11316905	RNASEK-C17orf49	chr17	-1.76588	0.200104	1.98e-09	5.39e-09	-119413	Negative	protein_coding	-73114	Distal non-target gene eQTMs
ENSG00000010282	cg09767885	HHATL	chr3	28.543	3.96277	1.77e-06	3.64e-06	184631	Positive	protein_coding	-72776	Distal non-target gene eQTMs
ENSG00000110025	cg07088929	SNX15	chr11	-10.5464	0.846372	8.89e-18	5.42e-17	-306238	Negative	protein_coding	-71915	Distal non-target gene eQTMs
ENSG00000168067	cg07088929	MAP4K2	chr11	-6.44558	0.822458	5.92e-08	1.4e-07	548759	Negative	protein_coding	-71915	Distal non-target gene eQTMs
ENSG00000105245	cg21070656	NUMBL	chr19	-7.86062	0.501254	2.9e-24	3.5e-23	598382	Positive	protein_coding	-71238	Distal non-target gene eQTMs
ENSG00000028277	cg21070656	POU2F2	chr19	-2.45506	0.183425	4.64e-19	3.2e-18	-821823	Negative	protein_coding	-71238	Distal non-target gene eQTMs
ENSG00000076928	cg21070656	ARHGEF1	chr19	-14.2077	1.36557	7.56e-14	3.1e-13	618874	Negative	protein_coding	-71238	Distal non-target gene eQTMs
ENSG00000090013	cg21070656	BLVRB	chr19	-2.75055	0.259413	4.14e-13	1.58e-12	816522	Negative	protein_coding	-71238	Distal non-target gene eQTMs
ENSG00000184209	cg22813729	SNRNP35	chr12	-2.31449	0.461124	0.00246702	0.00368595	490442	Negative	protein_coding	-70755	Distal non-target gene eQTMs
ENSG00000136146	cg23112804	MED4	chr13	8.15547	0.830673	5.79e-13	2.19e-12	250448	Negative	protein_coding	-70613	Distal non-target gene eQTMs
ENSG00000278467	cg23982151	RP11-504P24.9	chr1	-1.10692	0.21675	0.00082685	0.00130202	-189663	Negative	lincRNA	-69838	Distal non-target gene eQTMs
ENSG00000162194	cg26363414	LBHD1	chr11	-30.8191	3.23536	1.11e-11	3.71e-11	8368	Negative	protein_coding	-69345	Distal non-target gene eQTMs
ENSG00000176472	cg10196128	ZNF575	chr19	0.311717	0.0235959	8.29e-20	6.19e-19	-546645	Negative	protein_coding	-69306	Distal non-target gene eQTMs
ENSG00000124444	cg03828121	ZNF576	chr19	3.21696	0.475037	1.07e-06	2.25e-06	-475594	Positive	protein_coding	-69150	Distal non-target gene eQTMs
ENSG00000260260	cg02386244	SNHG19	chr16	-1.43724	0.151036	9.91e-09	2.53e-08	825851	Negative	lincRNA	-68711	Distal non-target gene eQTMs
ENSG00000167774	cg15004949	CTD-2550O8.5	chr19	0.820733	0.101769	8.19e-07	1.74e-06	205600	Positive	protein_coding	-68286	Distal non-target gene eQTMs
ENSG00000163975	cg13535903	MELTF	chr3	-2.03701	0.153098	1.32e-16	7.1e-16	378709	Negative	protein_coding	-68030	Distal non-target gene eQTMs
ENSG00000160111	cg07374145	CPAMD8	chr19	74.0617	8.58762	0.0386938	0.0495117	1108067	Negative	protein_coding	-67998	Distal non-target gene eQTMs
ENSG00000075089	cg18467133	ACTR6	chr12	-5.55147	0.465513	8.43e-19	5.66e-18	-68575	Negative	protein_coding	-67914	Distal non-target gene eQTMs
ENSG00000166153	cg18467133	DEPDC4	chr12	-0.154334	0.018316	1.03e-09	2.88e-09	64028	Negative	protein_coding	-67914	Distal non-target gene eQTMs
ENSG00000136021	cg04924415	SCYL2	chr12	-14.2106	1.21492	1.23e-18	8.13e-18	-538	Negative	protein_coding	-67895	Distal non-target gene eQTMs
ENSG00000254510	cg01759756	RP11-867G23.10	chr11	0.390067	0.0831118	0.0141927	0.0192393	-403041	Positive	processed_transcript	-67748	Distal non-target gene eQTMs
ENSG00000276097	cg26903766	AC006538.8	chr19	-1.38749	0.158049	2.12e-05	3.93e-05	-468820	Negative	sense_intronic	-67404	Distal non-target gene eQTMs
ENSG00000187630	cg18424115	DHRS4L2	chr14	1.62743	0.186272	2.56e-07	5.71e-07	-329829	Positive	protein_coding	-67281	Distal non-target gene eQTMs
ENSG00000129968	cg08502240	ABHD17A	chr19	-17.5171	0.6635	1.49e-44	2.45e-42	-892373	Negative	protein_coding	-67150	Distal non-target gene eQTMs
ENSG00000071655	cg08502240	MBD3	chr19	-18.9261	0.925513	2.53e-32	7.4e-31	-589159	Negative	protein_coding	-67150	Distal non-target gene eQTMs
ENSG00000227500	cg08502240	SCAMP4	chr19	-14.2588	0.807965	1.66e-29	3.51e-28	920935	Negative	protein_coding	-67150	Distal non-target gene eQTMs
ENSG00000129946	cg08502240	SHC2	chr19	-11.7843	0.763307	1.83e-21	1.6e-20	567854	Negative	protein_coding	-67150	Distal non-target gene eQTMs
ENSG00000100350	cg25333298	FOXRED2	chr22	-16.6814	0.870583	1.03e-29	2.23e-28	-32124	Positive	protein_coding	-67048	Distal non-target gene eQTMs
ENSG00000223573	cg16026760	TINCR	chr19	4.59291	0.6892	3.05e-05	5.57e-05	-766480	Positive	protein_coding	-67014	Distal non-target gene eQTMs
ENSG00000180616	cg04552931	SSTR2	chr17	6.52666	0.459501	2.69e-22	2.61e-21	-66974	Positive	protein_coding	-67007	Distal non-target gene eQTMs
ENSG00000178951	cg15075985	ZBTB7A	chr19	-82.3108	2.85089	1.34e-49	5.48e-47	748251	Negative	protein_coding	-66881	Distal non-target gene eQTMs
ENSG00000105229	cg15075985	PIAS4	chr19	-22.2914	1.13848	5.85e-34	2.22e-32	-783818	Negative	protein_coding	-66881	Distal non-target gene eQTMs
ENSG00000141965	cg15075985	FEM1A	chr19	-24.1235	1.27284	7.51e-32	2.09e-30	127	Positive	protein_coding	-66881	Distal non-target gene eQTMs
ENSG00000276141	cg26959990	WHAMMP3	chr15	3.23835	0.393956	3.12e-10	9.1e-10	-174259	Positive	transcribed_unprocessed_pseudogene	-65555	Distal non-target gene eQTMs
ENSG00000129353	cg07515324	SLC44A2	chr19	-55.6292	6.02487	1.77e-08	4.41e-08	251797	Negative	protein_coding	-65552	Distal non-target gene eQTMs
ENSG00000125899	cg13803048	C20orf187	chr20	0.603194	0.0460579	3.14e-14	1.34e-13	562045	Positive	lincRNA	-65472	Distal non-target gene eQTMs
ENSG00000182636	cg07483245	NDN	chr15	3.05499	0.591811	0.00040568	0.00066127	-847210	Positive	protein_coding	-65406	Distal non-target gene eQTMs
ENSG00000125863	cg23632840	MKKS	chr20	15.0164	1.20495	5.78e-19	3.94e-18	33065	Positive	protein_coding	-65298	Distal non-target gene eQTMs
ENSG00000101333	cg23632840	PLCB4	chr20	14.7743	2.48467	3.68e-05	6.66e-05	-1365311	Positive	protein_coding	-65298	Distal non-target gene eQTMs
ENSG00000270777	cg23632840	RP11-103J8.2	chr20	0.458675	0.0802255	3.97e-05	7.16e-05	567230	Positive	lincRNA	-65298	Distal non-target gene eQTMs
ENSG00000145476	cg06812822	CYP4V2	chr4	-36.2558	4.73715	3.92e-08	9.47e-08	169836	Negative	protein_coding	-65079	Distal non-target gene eQTMs
ENSG00000272841	cg03322161	RP3-428L16.2	chr6	0.525925	0.0750417	3.58e-07	7.88e-07	-223028	Positive	antisense	-65052	Distal non-target gene eQTMs
ENSG00000175348	cg05003666	TMEM9B	chr11	-15.8693	2.10032	3.07e-08	7.48e-08	-866032	Positive	protein_coding	-64681	Distal non-target gene eQTMs
ENSG00000236200	cg08959526	KDM4A-AS1	chr1	-3.65924	0.645297	0.00129151	0.00198934	85200	Negative	antisense	-64499	Distal non-target gene eQTMs
ENSG00000233223	cg10138041	AC113189.5	chr17	-1.78472	0.0670013	8.32e-43	9.95e-41	-97589	Negative	antisense	-64272	Distal non-target gene eQTMs
ENSG00000251576	cg18473544	LINC01267	chr3	-0.936651	0.135732	0.00010068	0.00017436	19648	Negative	lincRNA	-64254	Distal non-target gene eQTMs
ENSG00000103175	cg07126095	WFDC1	chr16	-15.9504	2.05547	8.08e-07	1.72e-06	-323364	Negative	protein_coding	-64177	Distal non-target gene eQTMs
ENSG00000177363	cg00435526	LRRN4CL	chr11	0.841901	0.082065	1.67e-08	4.17e-08	-20521	Positive	protein_coding	-64045	Distal non-target gene eQTMs
ENSG00000137507	cg26674199	LRRC32	chr11	-6.04456	1.28704	0.0133814	0.0182014	-212528	Negative	protein_coding	-64025	Distal non-target gene eQTMs
ENSG00000184608	cg21775007	FAM167A-AS1	chr8	-0.354468	0.051917	2.45e-06	4.98e-06	20292	Negative	antisense	-63694	Distal non-target gene eQTMs
ENSG00000008294	cg10792202	SPAG9	chr17	66.7288	7.25262	2.13e-10	6.31e-10	-30610	Negative	protein_coding	-63586	Distal non-target gene eQTMs
ENSG00000278963	cg10792202	RP11-294J22.7	chr17	-1.63014	0.147726	2.62e-10	7.7e-10	-209490	Negative	TEC	-63586	Distal non-target gene eQTMs
ENSG00000268686	cg25658980	AC010524.2	chr19	-0.783249	0.133042	0.00023949	0.00039876	83189	Negative	antisense	-63529	Distal non-target gene eQTMs
ENSG00000234857	cg23050254	HNRNPUL2-BSCL2	chr11	-40.6908	2.00189	2.19e-34	8.83e-33	-25100	Negative	protein_coding	-63335	Distal non-target gene eQTMs
ENSG00000168002	cg23050254	POLR2G	chr11	9.84106	0.564572	7.11e-31	1.78e-29	96390	Negative	protein_coding	-63335	Distal non-target gene eQTMs
ENSG00000140464	cg12976254	PML	chr15	-11.0133	0.751519	2.24e-23	2.43e-22	-911961	Positive	protein_coding	-63288	Distal non-target gene eQTMs
ENSG00000173546	cg12976254	CSPG4	chr15	-1.20781	0.0887981	4.65e-21	3.92e-20	-767688	Positive	protein_coding	-63288	Distal non-target gene eQTMs
ENSG00000086544	cg08533403	ITPKC	chr19	-5.14	0.989463	0.00124057	0.00191439	368301	Positive	protein_coding	-63275	Distal non-target gene eQTMs
ENSG00000149503	cg08462117	INCENP	chr11	-8.70621	0.516	3.76e-27	6.26e-26	-541113	Negative	protein_coding	-63271	Distal non-target gene eQTMs
ENSG00000134780	cg08462117	DAGLA	chr11	-9.14342	0.5578	2.91e-26	4.37e-25	-984720	Negative	protein_coding	-63271	Distal non-target gene eQTMs
ENSG00000162227	cg08462117	TAF6L	chr11	-3.89584	0.335423	1.94e-16	1.03e-15	106246	Positive	protein_coding	-63271	Distal non-target gene eQTMs
ENSG00000149541	cg08462117	B3GAT3	chr11	-19.8745	1.76415	7.25e-16	3.64e-15	49815	Positive	protein_coding	-63271	Distal non-target gene eQTMs
ENSG00000185085	cg08462117	INTS5	chr11	-4.69173	0.435046	8.93e-15	4.02e-14	18263	Negative	protein_coding	-63271	Distal non-target gene eQTMs
ENSG00000134824	cg08462117	FADS2	chr11	-38.3707	4.1643	3.94e-11	1.25e-10	-872131	Negative	protein_coding	-63271	Distal non-target gene eQTMs
ENSG00000214753	cg08462117	HNRNPUL2	chr11	23.8175	2.6628	9.94e-11	3.03e-10	-47519	Positive	protein_coding	-63271	Distal non-target gene eQTMs
ENSG00000149016	cg08462117	TUT1	chr11	-6.19794	0.709463	9.64e-10	2.7e-09	90066	Negative	protein_coding	-63271	Distal non-target gene eQTMs
ENSG00000179134	cg12016209	SAMD4B	chr19	-21.6299	1.46389	8.98e-24	1.02e-22	-1006106	Negative	protein_coding	-62966	Distal non-target gene eQTMs
ENSG00000269951	cg08540835	RP11-797A18.6	chr15	-0.507397	0.0732104	1.21e-06	2.53e-06	415189	Negative	sense_intronic	-62699	Distal non-target gene eQTMs
ENSG00000255020	cg21293242	AF131216.5	chr8	-7.96437	0.733259	8.1e-15	3.67e-14	1284	Positive	antisense	-62616	Distal non-target gene eQTMs
ENSG00000178971	cg18327730	CTC1	chr17	-20.9735	2.00354	5.74e-14	2.39e-13	-38462	Negative	protein_coding	-62261	Distal non-target gene eQTMs
ENSG00000148604	cg19709886	RGR	chr10	75.0456	17.2075	0.00621163	0.00884178	29241	Positive	protein_coding	-61985	Distal non-target gene eQTMs
ENSG00000100441	cg26071823	KHNYN	chr14	-3.41087	0.382097	6.35e-10	1.8e-09	315313	Negative	protein_coding	-61973	Distal non-target gene eQTMs
ENSG00000223396	cg15622697	RP11-134G8.5	chr1	0.515164	0.0509386	9.66e-13	3.57e-12	-437002	Negative	lincRNA	-61863	Distal non-target gene eQTMs
ENSG00000117139	cg15622697	KDM5B	chr1	-88.3135	9.07179	1.59e-12	5.75e-12	-768790	Positive	protein_coding	-61863	Distal non-target gene eQTMs
ENSG00000188868	cg03402132	ZNF563	chr19	-0.600604	0.108478	0.00080227	0.00126524	-881318	Negative	protein_coding	-61224	Distal non-target gene eQTMs
ENSG00000125533	cg02047577	BHLHE23	chr20	-1.29774	0.0765366	4.55e-21	3.84e-20	950422	Negative	protein_coding	-61167	Distal non-target gene eQTMs
ENSG00000112033	cg08342588	PPARD	chr6	13.3878	0.949676	9.72e-23	9.85e-22	815359	Negative	protein_coding	-61138	Distal non-target gene eQTMs
ENSG00000137309	cg08342588	HMGA1	chr6	24.5421	1.68902	4.28e-22	4.06e-21	-290326	Negative	protein_coding	-61138	Distal non-target gene eQTMs
ENSG00000186577	cg08342588	C6orf1	chr6	3.86668	0.438245	2.2e-10	6.51e-10	280818	Negative	protein_coding	-61138	Distal non-target gene eQTMs
ENSG00000275645	cg01331649	RP11-817O13.9	chr15	0.373435	0.0508796	2.71e-07	6.03e-07	557477	Positive	antisense	-60936	Distal non-target gene eQTMs
ENSG00000144802	cg13047989	NFKBIZ	chr3	-14.7994	1.74172	9.37e-10	2.63e-09	253826	Negative	protein_coding	-60924	Distal non-target gene eQTMs
ENSG00000139178	cg15974062	C1RL	chr12	7.96935	1.48392	0.00445476	0.0064555	-365741	Positive	protein_coding	-60698	Distal non-target gene eQTMs
ENSG00000167470	cg03309347	MIDN	chr19	155.44	18.6761	1.1e-05	2.1e-05	10318	Negative	protein_coding	-60677	Distal non-target gene eQTMs
ENSG00000185761	cg03309347	ADAMTSL5	chr19	1.66534	0.21249	0.00011055	0.00019048	-266787	Positive	protein_coding	-60677	Distal non-target gene eQTMs
ENSG00000070404	cg03309347	FSTL3	chr19	6.11428	0.847961	0.00452713	0.0065539	-561843	Positive	protein_coding	-60677	Distal non-target gene eQTMs
ENSG00000170044	cg10081773	ZPLD1	chr3	3.97875	0.648094	1.72e-05	3.22e-05	525419	Positive	protein_coding	-60584	Distal non-target gene eQTMs
ENSG00000203685	cg02033788	STUM	chr1	-6.47952	0.845137	2.15e-07	4.84e-07	426357	Negative	protein_coding	-60556	Distal non-target gene eQTMs
ENSG00000140386	cg00260857	SCAPER	chr15	69.0376	9.97024	1.32e-06	2.75e-06	-444087	Positive	protein_coding	-60532	Distal non-target gene eQTMs
ENSG00000137806	cg19440278	NDUFAF1	chr15	3.26923	0.249234	3.01e-19	2.12e-18	-631894	Positive	protein_coding	-60352	Distal non-target gene eQTMs
ENSG00000104872	cg02578673	PIH1D1	chr19	4.32321	0.538384	1.33e-08	3.35e-08	430403	Negative	protein_coding	-59325	Distal non-target gene eQTMs
ENSG00000227733	cg08682063	RP4-565E6.1	chr1	-1.51218	0.169947	1.11e-11	3.71e-11	-559023	Negative	lincRNA	-58778	Distal non-target gene eQTMs
ENSG00000237188	cg08682063	RP11-337C18.8	chr1	0.680358	0.102677	9.03e-07	1.91e-06	-427435	Positive	antisense	-58778	Distal non-target gene eQTMs
ENSG00000273184	cg07399816	RP11-212P7.3	chr7	1.26483	0.143706	2.5e-10	7.35e-10	803966	Positive	processed_transcript	-58263	Distal non-target gene eQTMs
ENSG00000164008	cg02508525	C1orf50	chr1	1.57286	0.151425	1.41e-13	5.63e-13	-996474	Positive	protein_coding	-57899	Distal non-target gene eQTMs
ENSG00000181856	cg18055452	SLC2A4	chr17	2.17337	0.250805	3.94e-07	8.65e-07	-900282	Negative	protein_coding	-57857	Distal non-target gene eQTMs
ENSG00000281344	cg23099157	HELLPAR	chr12	0.246555	0.0442324	8.94e-05	0.00015573	77652	Positive	macro_lncRNA	-57784	Distal non-target gene eQTMs
ENSG00000139352	cg02806658	ASCL1	chr12	1.92952	0.312368	3.13e-05	5.71e-05	837860	Positive	protein_coding	-57665	Distal non-target gene eQTMs
ENSG00000167077	cg17601959	MEI1	chr22	-1.37419	0.194379	2.38e-05	4.38e-05	194889	Positive	protein_coding	-57591	Distal non-target gene eQTMs
ENSG00000100197	cg17601959	CYP2D6	chr22	-3.12445	0.605747	0.00663168	0.00939404	-621885	Negative	protein_coding	-57591	Distal non-target gene eQTMs
ENSG00000103966	cg02126638	EHD4	chr15	-19.3901	2.16943	9.36e-10	2.63e-09	652656	Positive	protein_coding	-57356	Distal non-target gene eQTMs
ENSG00000244119	cg11804524	PDCL3P4	chr3	-1.76653	0.261102	4.17e-07	9.13e-07	-67445	Negative	processed_pseudogene	-55992	Distal non-target gene eQTMs
ENSG00000166801	cg16913508	FAM111A	chr11	11.1306	1.58877	3.26e-07	7.21e-07	-668140	Positive	protein_coding	-55913	Distal non-target gene eQTMs
ENSG00000118922	cg06116962	KLF12	chr13	-9.6417	1.1154	3.18e-11	1.01e-10	-903223	Negative	protein_coding	-55179	Distal non-target gene eQTMs
ENSG00000134899	cg19726225	ERCC5	chr13	10.8249	0.581142	1.85e-32	5.52e-31	349572	Positive	protein_coding	-55117	Distal non-target gene eQTMs
ENSG00000081148	cg03509671	IMPG2	chr3	-582.561	55.675	3.15e-15	1.49e-14	556486	Positive	protein_coding	-55107	Distal non-target gene eQTMs
ENSG00000241832	cg07597874	CECR3	chr22	2.43944	0.472386	0.00083686	0.00131661	821784	Positive	lincRNA	-54084	Distal non-target gene eQTMs
ENSG00000105357	cg22364668	MYH14	chr19	53.4711	2.16764	3.55e-41	3.41e-39	746617	Positive	protein_coding	-53488	Distal non-target gene eQTMs
ENSG00000104805	cg22364668	NUCB1	chr19	36.812	2.05237	1.92e-30	4.58e-29	-541257	Positive	protein_coding	-53488	Distal non-target gene eQTMs
ENSG00000010361	cg22364668	FUZ	chr19	3.72407	0.233852	2.14e-24	2.62e-23	-365300	Positive	protein_coding	-53488	Distal non-target gene eQTMs
ENSG00000062822	cg08460548	POLD1	chr19	3.94842	0.233052	1.57e-27	2.72e-26	942644	Negative	protein_coding	-53479	Distal non-target gene eQTMs
ENSG00000273032	cg18404974	DGCR9	chr22	-3.7498	0.273697	1.26e-20	1.02e-19	892624	Negative	lincRNA	-53342	Distal non-target gene eQTMs
ENSG00000177663	cg25739518	IL17RA	chr22	-3.20918	0.40742	2.66e-08	6.52e-08	-992945	Negative	protein_coding	-53340	Distal non-target gene eQTMs
ENSG00000161664	cg16931499	ASB16	chr17	1.29528	0.0759585	1.47e-25	2.05e-24	-538861	Positive	protein_coding	-52904	Distal non-target gene eQTMs
ENSG00000125827	cg06962867	TMX4	chr20	31.2521	8.00502	0.0219491	0.0290106	152087	Positive	protein_coding	-52182	Distal non-target gene eQTMs
ENSG00000259775	cg03366776	RP11-45P15.4	chr14	-2.12543	0.249444	2.39e-07	5.35e-07	53616	Negative	antisense	-51746	Distal non-target gene eQTMs
ENSG00000220008	cg18605066	LINGO3	chr19	6.60061	0.268907	1.98e-40	1.74e-38	739376	Positive	protein_coding	-51714	Distal non-target gene eQTMs
ENSG00000104886	cg18605066	PLEKHJ1	chr19	3.10814	0.303713	8.85e-13	3.28e-12	799076	Positive	protein_coding	-51714	Distal non-target gene eQTMs
ENSG00000196663	cg01290580	TECPR2	chr14	19.2502	2.75713	1.16e-06	2.43e-06	-1022224	Positive	protein_coding	-51621	Distal non-target gene eQTMs
ENSG00000256223	cg14876115	ZNF10	chr12	12.8067	1.64649	4.69e-06	9.26e-06	93075	Negative	protein_coding	-51135	Distal non-target gene eQTMs
ENSG00000259959	cg22414949	RP11-121C2.2	chr4	3.67414	0.439409	1.84e-09	5.03e-09	991141	Positive	lincRNA	-50941	Distal non-target gene eQTMs
ENSG00000135447	cg15007132	PPP1R1A	chr12	13.1849	1.08272	3.78e-16	1.95e-15	-899168	Positive	protein_coding	-50240	Distal non-target gene eQTMs
ENSG00000105507	cg04937172	CABP5	chr19	-37.6958	6.06948	1.92e-05	3.57e-05	14662	Negative	protein_coding	-49964	Distal non-target gene eQTMs
ENSG00000149452	cg05041783	SLC22A8	chr11	-1.25089	0.184219	3.49e-05	6.33e-05	899597	Negative	protein_coding	-49823	Distal non-target gene eQTMs
ENSG00000274184	cg03944224	RP11-158H5.8	chr18	-0.776037	0.0809609	7.39e-12	2.51e-11	-22586	Negative	lincRNA	-49774	Distal non-target gene eQTMs
ENSG00000130479	cg00762326	MAP1S	chr19	-13.3385	0.402083	1.82e-58	3.55e-55	-852459	Positive	protein_coding	-49574	Distal non-target gene eQTMs
ENSG00000007080	cg00762326	CCDC124	chr19	-11.7416	0.485658	1.54e-39	1.19e-37	-638686	Negative	protein_coding	-49574	Distal non-target gene eQTMs
ENSG00000105647	cg00762326	PIK3R2	chr19	-16.1869	0.729686	1.91e-39	1.45e-37	-418538	Positive	protein_coding	-49574	Distal non-target gene eQTMs
ENSG00000130511	cg00762326	SSBP4	chr19	-6.54258	0.277315	1.66e-37	1e-35	-152837	Negative	protein_coding	-49574	Distal non-target gene eQTMs
ENSG00000105701	cg00762326	FKBP8	chr19	-74.0178	3.3518	4.54e-36	2.3e-34	39950	Positive	protein_coding	-49574	Distal non-target gene eQTMs
ENSG00000005007	cg00762326	UPF1	chr19	-25.0871	1.2529	1.86e-34	7.57e-33	260237	Negative	protein_coding	-49574	Distal non-target gene eQTMs
ENSG00000006015	cg00762326	C19orf60	chr19	-8.5136	0.397968	5.39e-33	1.75e-31	16984	Negative	protein_coding	-49574	Distal non-target gene eQTMs
ENSG00000167487	cg00762326	KLHL26	chr19	-3.56692	0.167245	6.78e-33	2.14e-31	65324	Positive	protein_coding	-49574	Distal non-target gene eQTMs
ENSG00000105662	cg00762326	CRTC1	chr19	-13.5948	0.796153	1.62e-26	2.51e-25	111977	Positive	protein_coding	-49574	Distal non-target gene eQTMs
ENSG00000099308	cg00762326	MAST3	chr19	-3.34313	0.220049	1.1e-22	1.11e-21	-473908	Negative	protein_coding	-49574	Distal non-target gene eQTMs
ENSG00000105642	cg00762326	KCNN1	chr19	-1.98521	0.135169	1.61e-18	1.05e-17	-620408	Positive	protein_coding	-49574	Distal non-target gene eQTMs
ENSG00000213999	cg00762326	MEF2B	chr19	-1.28171	0.0965947	1.84e-14	8.04e-14	-573866	Positive	protein_coding	-49574	Distal non-target gene eQTMs
ENSG00000130522	cg00762326	JUND	chr19	-39.5371	3.89667	5.01e-09	1.31e-08	291941	Negative	protein_coding	-49574	Distal non-target gene eQTMs
ENSG00000236287	cg13499067	ZBED5	chr11	-17.9407	1.35177	3.87e-21	3.28e-20	46008	Positive	protein_coding	-48972	Distal non-target gene eQTMs
ENSG00000133812	cg13499067	SBF2	chr11	-14.2418	1.51883	6.48e-12	2.21e-11	1079415	Positive	protein_coding	-48972	Distal non-target gene eQTMs
ENSG00000170242	cg13499067	USP47	chr11	-19.2448	2.04293	9.36e-11	2.86e-10	983341	Positive	protein_coding	-48972	Distal non-target gene eQTMs
ENSG00000174227	cg26057380	PIGG	chr4	6.54163	0.539894	6.94e-17	3.84e-16	-175310	Positive	protein_coding	-48936	Distal non-target gene eQTMs
ENSG00000261332	cg06714444	RP11-297C4.1	chr16	-0.545949	0.100871	0.0006743	0.00107151	135919	Negative	antisense	-48914	Distal non-target gene eQTMs
ENSG00000279726	cg01185940	AC005609.16	chr5	0.350788	0.0211487	5.35e-24	6.3e-23	-628218	Positive	antisense	-48850	Distal non-target gene eQTMs
ENSG00000243547	cg11301768	HNRNPKP4	chr3	0.721891	0.0331476	1.23e-41	1.26e-39	-513800	Positive	processed_pseudogene	-48773	Distal non-target gene eQTMs
ENSG00000099284	cg12329405	H2AFY2	chr10	-2.62895	0.17019	1.41e-23	1.58e-22	734230	Negative	protein_coding	-48632	Distal non-target gene eQTMs
ENSG00000060339	cg12329405	CCAR1	chr10	15.6679	1.17722	1.23e-20	9.99e-20	-597604	Negative	protein_coding	-48632	Distal non-target gene eQTMs
ENSG00000107625	cg12329405	DDX50	chr10	7.61639	0.800128	1.28e-11	4.25e-11	-417330	Positive	protein_coding	-48632	Distal non-target gene eQTMs
ENSG00000215375	cg14446768	MYL5	chr4	-33.0554	2.88015	2.65e-14	1.14e-13	-413	Negative	protein_coding	-48409	Distal non-target gene eQTMs
ENSG00000132207	cg17801467	SLX1A	chr16	-8.2177	0.434937	3.33e-29	6.84e-28	-505137	Negative	protein_coding	-48307	Distal non-target gene eQTMs
ENSG00000103507	cg17801467	BCKDK	chr16	-10.034	0.617101	7.23e-24	8.32e-23	407083	Negative	protein_coding	-48307	Distal non-target gene eQTMs
ENSG00000109576	cg17550513	AADAT	chr4	-3.03822	0.302603	2.64e-14	1.13e-13	-399667	Positive	protein_coding	-47922	Distal non-target gene eQTMs
ENSG00000137601	cg17550513	NEK1	chr4	-4.00561	0.539107	1.31e-07	3.01e-07	267698	Positive	protein_coding	-47922	Distal non-target gene eQTMs
ENSG00000153904	cg18635645	DDAH1	chr1	46.0038	3.78238	2.93e-18	1.87e-17	-116373	Positive	protein_coding	-47905	Distal non-target gene eQTMs
ENSG00000229859	cg01370129	PGA3	chr11	-0.59875	0.116215	0.0213118	0.0282172	-764359	Negative	protein_coding	-47397	Distal non-target gene eQTMs
ENSG00000135457	cg09989134	TFCP2	chr12	24.6302	4.27485	0.00011774	0.00020221	976201	Positive	protein_coding	-47032	Distal non-target gene eQTMs
ENSG00000171435	cg14539611	KSR2	chr12	4.23354	0.977764	0.0144401	0.0195565	-668842	Positive	protein_coding	-45992	Distal non-target gene eQTMs
ENSG00000179593	cg03639223	ALOX15B	chr17	-0.362596	0.0803665	0.0363917	0.0467259	573228	Negative	protein_coding	-45703	Distal non-target gene eQTMs
ENSG00000014138	cg20588618	POLA2	chr11	1.97787	0.168995	2.16e-16	1.14e-15	-353770	Positive	protein_coding	-45267	Distal non-target gene eQTMs
ENSG00000100985	cg07277624	MMP9	chr20	0.289345	0.0569164	0.00208834	0.00314612	602406	Negative	protein_coding	-44565	Distal non-target gene eQTMs
ENSG00000272970	cg23155810	RP11-329B9.4	chr3	1.00556	0.0530176	7.31e-26	1.05e-24	481711	Positive	lincRNA	-44511	Distal non-target gene eQTMs
ENSG00000114796	cg23155810	KLHL24	chr3	-24.9449	2.17915	1.41e-15	6.88e-15	-594924	Positive	protein_coding	-44511	Distal non-target gene eQTMs
ENSG00000161203	cg23155810	AP2M1	chr3	47.2199	5.50505	2.67e-10	7.83e-10	-55845	Positive	protein_coding	-44511	Distal non-target gene eQTMs
ENSG00000163888	cg23155810	CAMK2N2	chr3	3.72674	0.452163	4.29e-08	1.03e-07	-28679	Positive	protein_coding	-44511	Distal non-target gene eQTMs
ENSG00000159840	cg01171849	ZYX	chr7	-18.6983	2.00052	2.02e-10	5.99e-10	92951	Positive	protein_coding	-44251	Distal non-target gene eQTMs
ENSG00000221978	cg10934589	CCNL2	chr1	19.1912	2.5403	2.27e-07	5.1e-07	661999	Positive	protein_coding	-43873	Distal non-target gene eQTMs
ENSG00000260669	cg01420348	AL136419.6	chr14	-1.83314	0.158327	2.19e-15	1.05e-14	-113889	Negative	processed_transcript	-43757	Distal non-target gene eQTMs
ENSG00000197747	cg20634798	S100A10	chr1	8.64743	1.1599	5.05e-07	1.1e-06	639960	Positive	protein_coding	-42371	Distal non-target gene eQTMs
ENSG00000173581	cg12129596	CCDC106	chr19	8.68101	0.374181	2.58e-40	2.2e-38	382393	Negative	protein_coding	-42009	Distal non-target gene eQTMs
ENSG00000125503	cg12129596	PPP1R12C	chr19	28.5324	1.41079	1.66e-31	4.43e-30	167755	Negative	protein_coding	-42009	Distal non-target gene eQTMs
ENSG00000108107	cg12129596	RPL28	chr19	57.9992	3.54265	1.75e-26	2.69e-25	126676	Negative	protein_coding	-42009	Distal non-target gene eQTMs
ENSG00000213015	cg12129596	ZNF580	chr19	6.041	0.36024	7.59e-25	9.69e-24	376347	Negative	protein_coding	-42009	Distal non-target gene eQTMs
ENSG00000180089	cg12129596	TMEM86B	chr19	1.79243	0.137926	1.35e-18	8.89e-18	32030	Negative	protein_coding	-42009	Distal non-target gene eQTMs
ENSG00000080031	cg12129596	PTPRH	chr19	1.0806	0.148799	9.32e-07	1.97e-06	77422	Negative	protein_coding	-42009	Distal non-target gene eQTMs
ENSG00000164086	cg18509826	DUSP7	chr3	2.78456	0.225096	7.24e-18	4.45e-17	-65550	Negative	protein_coding	-41428	Distal non-target gene eQTMs
ENSG00000240731	cg05597180	RP5-890O3.9	chr1	0.496321	0.0752078	8.68e-06	1.67e-05	727374	Positive	sense_intronic	-41118	Distal non-target gene eQTMs
ENSG00000153896	cg21767207	ZNF599	chr19	-2.77012	0.244043	1.22e-15	6e-15	987480	Negative	protein_coding	-41026	Distal non-target gene eQTMs
ENSG00000196357	cg20255711	ZNF565	chr19	2.06392	0.219013	6.02e-11	1.87e-10	-436595	Positive	protein_coding	-40938	Distal non-target gene eQTMs
ENSG00000168273	cg06162883	SMIM4	chr3	-0.934297	0.113686	3.08e-09	8.25e-09	551182	Negative	protein_coding	-40890	Distal non-target gene eQTMs
ENSG00000125434	cg05694744	SLC25A35	chr17	-3.42042	0.772564	0.0216708	0.0286644	739	Positive	protein_coding	-40884	Distal non-target gene eQTMs
ENSG00000006047	cg05694744	YBX2	chr17	-1.05016	0.240212	0.0335372	0.0432949	1000239	Negative	protein_coding	-40884	Distal non-target gene eQTMs
ENSG00000119574	cg06616879	ZBTB45	chr19	3.92202	0.158138	3.4e-43	4.43e-41	-985645	Positive	protein_coding	-40167	Distal non-target gene eQTMs
ENSG00000269793	cg06616879	ZIM2-AS1	chr19	-1.11495	0.0505372	3.36e-38	2.27e-36	-932572	Negative	antisense	-40167	Distal non-target gene eQTMs
ENSG00000268713	cg06616879	CTC-444N24.8	chr19	-1.5972	0.0952138	3.92e-28	7.16e-27	-266531	Negative	lincRNA	-40167	Distal non-target gene eQTMs
ENSG00000105136	cg06616879	ZNF419	chr19	-5.55559	0.341661	2.69e-27	4.54e-26	-40174	Negative	protein_coding	-40167	Distal non-target gene eQTMs
ENSG00000152467	cg06616879	ZSCAN1	chr19	1.06529	0.0659239	5.27e-24	6.21e-23	506147	Positive	protein_coding	-40167	Distal non-target gene eQTMs
ENSG00000183647	cg06616879	ZNF530	chr19	-1.97041	0.129415	2.03e-23	2.22e-22	72000	Negative	protein_coding	-40167	Distal non-target gene eQTMs
ENSG00000152439	cg06616879	ZNF773	chr19	-2.73997	0.187221	7.95e-23	8.14e-22	-27970	Negative	protein_coding	-40167	Distal non-target gene eQTMs
ENSG00000186272	cg06616879	ZNF17	chr19	-3.83139	0.268486	3.39e-22	3.25e-21	-116722	Positive	protein_coding	-40167	Distal non-target gene eQTMs
ENSG00000254539	cg20292245	RP4-791M13.3	chr1	2.28615	0.361291	1.86e-06	3.82e-06	-1002207	Negative	lincRNA	-40107	Distal non-target gene eQTMs
ENSG00000197016	cg19060970	ZNF470	chr19	-7.34325	1.14786	5.95e-05	0.00010542	-959752	Positive	protein_coding	-39502	Distal non-target gene eQTMs
ENSG00000269696	cg19060970	AC007228.11	chr19	-0.734541	0.126029	0.00019302	0.00032415	981654	Negative	antisense	-39502	Distal non-target gene eQTMs
ENSG00000107438	cg17303833	PDLIM1	chr10	-5.7429	1.07053	0.00029559	0.0004877	892119	Negative	protein_coding	-39453	Distal non-target gene eQTMs
ENSG00000184979	cg03730966	USP18	chr22	0.45508	0.0956325	0.0258359	0.0338729	888769	Positive	protein_coding	-39141	Distal non-target gene eQTMs
ENSG00000090971	cg23497436	NAT14	chr19	9.60051	0.863168	6.55e-15	2.99e-14	229435	Negative	protein_coding	-39093	Distal non-target gene eQTMs
ENSG00000185437	cg12054554	SH3BGR	chr21	-5.55014	0.910478	7.18e-05	0.00012632	57148	Negative	protein_coding	-39060	Distal non-target gene eQTMs
ENSG00000188486	cg02213487	H2AFX	chr11	14.6057	0.715539	2.52e-34	1.01e-32	-36489	Positive	protein_coding	-38933	Distal non-target gene eQTMs
ENSG00000255435	cg02213487	RP11-770J1.3	chr11	0.353315	0.0222088	4.66e-25	6.11e-24	547092	Positive	antisense	-38933	Distal non-target gene eQTMs
ENSG00000143294	cg09477492	PRCC	chr1	-24.1341	1.64079	4.89e-23	5.15e-22	-16712	Negative	protein_coding	-38880	Distal non-target gene eQTMs
ENSG00000280120	cg13837562	RP11-546D6.3	chr12	5.62557	0.463192	9.15e-18	5.57e-17	-885962	Positive	TEC	-38828	Distal non-target gene eQTMs
ENSG00000100154	cg19099736	TTC28	chr22	16.8985	0.862889	3e-33	1e-31	1328806	Negative	protein_coding	-38611	Distal non-target gene eQTMs
ENSG00000100330	cg19099736	MTMR3	chr22	-14.7035	1.81759	1.12e-08	2.84e-08	576335	Negative	protein_coding	-38611	Distal non-target gene eQTMs
ENSG00000106603	cg19236395	COA1	chr7	-8.4681	0.524317	3.33e-28	6.15e-27	474217	Positive	protein_coding	-38033	Distal non-target gene eQTMs
ENSG00000106633	cg19236395	GCK	chr7	0.870853	0.0735114	1.26e-15	6.19e-15	-61598	Positive	protein_coding	-38033	Distal non-target gene eQTMs
ENSG00000186300	cg18643460	ZNF555	chr19	-4.14251	0.490718	4.41e-09	1.16e-08	101064	Negative	protein_coding	-37664	Distal non-target gene eQTMs
ENSG00000100228	cg20279003	RAB36	chr22	4.10194	0.344275	2.13e-16	1.12e-15	-71428	Positive	protein_coding	-37050	Distal non-target gene eQTMs
ENSG00000273253	cg19333589	RP3-402G11.26	chr22	0.998033	0.0604406	1.77e-21	1.56e-20	364328	Positive	antisense	-36979	Distal non-target gene eQTMs
ENSG00000255559	cg13438334	ZNF252P-AS1	chr8	2.06012	0.18155	2.1e-15	1.01e-14	675485	Positive	antisense	-35735	Distal non-target gene eQTMs
ENSG00000169783	cg21159609	LINGO1	chr15	22.5278	1.00638	9.75e-40	7.72e-38	686779	Positive	protein_coding	-35720	Distal non-target gene eQTMs
ENSG00000140395	cg21159609	WDR61	chr15	-12.0696	0.702782	1.26e-29	2.71e-28	21971	Positive	protein_coding	-35720	Distal non-target gene eQTMs
ENSG00000106624	cg18769955	AEBP1	chr7	-6.4668	1.08074	0.0305735	0.0396567	24290	Negative	protein_coding	-35415	Distal non-target gene eQTMs
ENSG00000089101	cg27499953	CFAP61	chr20	-0.7054	0.121656	8.32e-05	0.00014538	15	Negative	protein_coding	-35383	Distal non-target gene eQTMs
ENSG00000198836	cg23573087	OPA1	chr3	-11.8592	1.85075	3.77e-06	7.5e-06	790128	Positive	protein_coding	-35252	Distal non-target gene eQTMs
ENSG00000132669	cg02092098	RIN2	chr20	9.77057	1.17084	6.39e-08	1.51e-07	-294731	Positive	protein_coding	-35221	Distal non-target gene eQTMs
ENSG00000167258	cg01341751	CDK12	chr17	8.6283	1.38213	2.58e-05	4.74e-05	-631747	Positive	protein_coding	-34943	Distal non-target gene eQTMs
ENSG00000176956	cg26054055	LY6H	chr8	0.671303	0.0511802	6.04e-16	3.05e-15	123490	Positive	protein_coding	-34294	Distal non-target gene eQTMs
ENSG00000184428	cg26054055	TOP1MT	chr8	0.76679	0.0672004	1.42e-12	5.16e-12	-22980	Positive	protein_coding	-34294	Distal non-target gene eQTMs
ENSG00000283293	cg22877288	RN7SK	chr6	34.1036	3.02437	2.73e-13	1.07e-12	-655626	Positive	snRNA	-34277	Distal non-target gene eQTMs
ENSG00000260269	cg20767181	CTD-2323K18.1	chr15	-0.761042	0.102601	3.34e-07	7.38e-07	-711079	Negative	processed_transcript	-34014	Distal non-target gene eQTMs
ENSG00000089693	cg16637873	MLF2	chr12	34.6902	1.79989	3.91e-33	1.3e-31	125662	Positive	protein_coding	-33704	Distal non-target gene eQTMs
ENSG00000105559	cg19334675	PLEKHA4	chr19	12.5279	1.68424	0.00292408	0.00432947	96364	Positive	protein_coding	-33411	Distal non-target gene eQTMs
ENSG00000130165	cg26494762	ELOF1	chr19	-4.1695	0.456614	1.05e-10	3.19e-10	-799960	Negative	protein_coding	-33108	Distal non-target gene eQTMs
ENSG00000155660	cg00289558	PDIA4	chr7	-6.67353	1.04855	3.01e-05	5.5e-05	868374	Negative	protein_coding	-33069	Distal non-target gene eQTMs
ENSG00000174276	cg16691477	ZNHIT2	chr11	2.02264	0.092391	5.81e-37	3.25e-35	5915	Positive	protein_coding	-32994	Distal non-target gene eQTMs
ENSG00000110046	cg16691477	ATG2A	chr11	8.0999	0.384399	2.55e-36	1.34e-34	227772	Negative	protein_coding	-32994	Distal non-target gene eQTMs
ENSG00000142186	cg16691477	SCYL1	chr11	19.4025	1.00527	4.03e-32	1.16e-30	402759	Negative	protein_coding	-32994	Distal non-target gene eQTMs
ENSG00000197136	cg16691477	PCNX3	chr11	16.5697	0.981277	1.03e-27	1.82e-26	493455	Negative	protein_coding	-32994	Distal non-target gene eQTMs
ENSG00000002330	cg16691477	BAD	chr11	7.65937	0.459252	1.3e-26	2.04e-25	852488	Negative	protein_coding	-32994	Distal non-target gene eQTMs
ENSG00000175115	cg16691477	PACS1	chr11	37.1972	2.38424	1.5e-25	2.09e-24	947954	Negative	protein_coding	-32994	Distal non-target gene eQTMs
ENSG00000162302	cg16691477	RPS6KA4	chr11	3.18879	0.217146	2.64e-23	2.85e-22	-763170	Positive	protein_coding	-32994	Distal non-target gene eQTMs
ENSG00000172977	cg16691477	KAT5	chr11	14.1663	0.980555	1.31e-22	1.31e-21	589678	Negative	protein_coding	-32994	Distal non-target gene eQTMs
ENSG00000173153	cg16691477	ESRRA	chr11	5.20869	0.359476	5.44e-22	5.1e-21	-816794	Negative	protein_coding	-32994	Distal non-target gene eQTMs
ENSG00000149809	cg16691477	TM7SF2	chr11	9.70238	0.646393	1.17e-19	8.6e-19	-10473	Positive	protein_coding	-32994	Distal non-target gene eQTMs
ENSG00000133315	cg16691477	MACROD1	chr11	2.16711	0.164224	4.32e-18	2.7e-17	1123760	Positive	protein_coding	-32994	Distal non-target gene eQTMs
ENSG00000087365	cg16691477	SF3B2	chr11	26.1778	2.69172	1.48e-11	4.88e-11	928411	Positive	protein_coding	-32994	Distal non-target gene eQTMs
ENSG00000137492	cg20778776	THAP12	chr11	-21.5549	2.24572	1.56e-10	4.68e-10	-965332	Negative	protein_coding	-32919	Distal non-target gene eQTMs
ENSG00000221916	cg19104731	C19orf73	chr19	0.511723	0.0548121	5.77e-11	1.8e-10	732576	Positive	protein_coding	-32699	Distal non-target gene eQTMs
ENSG00000132670	cg12999086	PTPRA	chr20	-20.1521	2.99469	2.23e-05	4.12e-05	937611	Negative	protein_coding	-32406	Distal non-target gene eQTMs
ENSG00000277075	cg08472398	HIST1H2AE	chr6	0.499232	0.0502233	4.98e-09	1.31e-08	60462	Positive	protein_coding	-32368	Distal non-target gene eQTMs
ENSG00000204842	cg08401718	ATXN2	chr12	-3.06499	0.708529	0.0222424	0.0293829	-943425	Negative	protein_coding	-31696	Distal non-target gene eQTMs
ENSG00000099957	cg24908336	P2RX6	chr22	-3.39235	0.348729	5.42e-11	1.7e-10	14122	Negative	protein_coding	-30578	Distal non-target gene eQTMs
ENSG00000100280	cg21156790	AP1B1	chr22	-128.255	9.14559	1.55e-22	1.54e-21	-555021	Negative	protein_coding	-30237	Distal non-target gene eQTMs
ENSG00000100319	cg21156790	ZMAT5	chr22	-6.40409	0.569745	1.06e-16	5.77e-16	-958297	Positive	protein_coding	-30237	Distal non-target gene eQTMs
ENSG00000221817	cg12998010	PPP3CB-AS1	chr10	-0.458447	0.0658243	3.66e-07	8.05e-07	-160616	Negative	processed_transcript	-30188	Distal non-target gene eQTMs
ENSG00000163597	cg24321297	SNHG16	chr17	-9.05846	1.37358	1.04e-05	1.99e-05	-23544	Negative	processed_transcript	-30133	Distal non-target gene eQTMs
ENSG00000272661	cg02328113	RP4-548D19.3	chr7	-0.411588	0.064493	2e-05	3.71e-05	181885	Negative	antisense	-30092	Distal non-target gene eQTMs
ENSG00000121578	cg09157144	B4GALT4	chr3	-7.63218	0.733077	1.83e-14	7.99e-14	286867	Positive	protein_coding	-29769	Distal non-target gene eQTMs
ENSG00000078814	cg02674305	MYH7B	chr20	-9.13329	0.733843	3.01e-16	1.56e-15	-796590	Negative	protein_coding	-29681	Distal non-target gene eQTMs
ENSG00000244462	cg02674305	RBM12	chr20	12.7307	1.86354	2.01e-06	4.11e-06	123068	Positive	protein_coding	-29681	Distal non-target gene eQTMs
ENSG00000131115	cg27077673	ZNF227	chr19	4.54106	0.420967	1.25e-13	5.01e-13	-442666	Negative	protein_coding	-29392	Distal non-target gene eQTMs
ENSG00000204920	cg27077673	ZNF155	chr19	2.19833	0.377429	0.00015611	0.00026446	-682351	Positive	protein_coding	-29392	Distal non-target gene eQTMs
ENSG00000100823	cg22101576	APEX1	chr14	10.4226	1.91268	0.00028449	0.00047019	-644227	Positive	protein_coding	-28546	Distal non-target gene eQTMs
ENSG00000244625	cg18802885	MIATNB	chr22	-0.803214	0.0903183	1.67e-09	4.59e-09	160337	Negative	lincRNA	-28533	Distal non-target gene eQTMs
ENSG00000163558	cg05952749	PRKCI	chr3	-5.36635	0.662615	1.06e-08	2.69e-08	282393	Negative	protein_coding	-28459	Distal non-target gene eQTMs
ENSG00000100814	cg01027805	CCNB1IP1	chr14	-4.10544	0.343837	1.36e-16	7.31e-16	787336	Negative	protein_coding	-27832	Distal non-target gene eQTMs
ENSG00000227051	cg10787120	C14orf132	chr14	17.6788	3.45323	0.0016633	0.00253512	-352084	Negative	protein_coding	-27538	Distal non-target gene eQTMs
ENSG00000124172	cg11414560	ATP5E	chr20	-15.5606	0.873195	2.21e-31	5.8e-30	579466	Negative	protein_coding	-27432	Distal non-target gene eQTMs
ENSG00000110799	cg12373600	VWF	chr12	14.2398	1.94346	2.09e-05	3.87e-05	741338	Positive	protein_coding	-27064	Distal non-target gene eQTMs
ENSG00000181652	cg18450626	ATG9B	chr7	3.5698	0.750884	0.0355823	0.0457569	73359	Positive	protein_coding	-27038	Distal non-target gene eQTMs
ENSG00000166598	cg10155468	HSP90B1	chr12	85.0927	14.9057	0.00093322	0.00146088	-26745	Positive	protein_coding	-26641	Distal non-target gene eQTMs
ENSG00000106351	cg02701985	AGFG2	chr7	-6.19977	0.41429	8.54e-23	8.71e-22	-705816	Negative	protein_coding	-26599	Distal non-target gene eQTMs
ENSG00000167011	cg02701985	NAT16	chr7	-14.4417	1.24767	1.74e-13	6.9e-13	74523	Negative	protein_coding	-26599	Distal non-target gene eQTMs
ENSG00000196411	cg02701985	EPHB4	chr7	-2.38058	0.2148	9.74e-11	2.97e-10	442454	Negative	protein_coding	-26599	Distal non-target gene eQTMs
ENSG00000224729	cg02701985	PCOLCE-AS1	chr7	-0.960944	0.0929676	9.68e-09	2.47e-08	655617	Negative	antisense	-26599	Distal non-target gene eQTMs
ENSG00000086666	cg01843524	ZFAND6	chr15	26.2601	1.98585	1.33e-20	1.08e-19	135634	Positive	protein_coding	-26555	Distal non-target gene eQTMs
ENSG00000131116	cg14066757	ZNF428	chr19	-13.4219	0.584068	1.66e-40	1.49e-38	174192	Positive	protein_coding	-26426	Distal non-target gene eQTMs
ENSG00000106261	cg16599901	ZKSCAN1	chr7	-10.7366	2.29747	0.0119171	0.0163207	-596902	Negative	protein_coding	-26321	Distal non-target gene eQTMs
ENSG00000255857	cg23185481	PXN-AS1	chr12	-2.51406	0.348099	1.63e-06	3.37e-06	-294744	Negative	antisense	-26242	Distal non-target gene eQTMs
ENSG00000258644	cg14369329	SYNJ2BP-COX16	chr14	-0.963615	0.053741	2.68e-30	6.26e-29	-688324	Negative	protein_coding	-26144	Distal non-target gene eQTMs
ENSG00000152520	cg06051243	PAN3	chr13	25.9218	2.69185	3.04e-13	1.18e-12	687961	Negative	protein_coding	-26001	Distal non-target gene eQTMs
ENSG00000105219	cg09114441	CNTD2	chr19	0.537104	0.0516828	3.14e-12	1.1e-11	-225437	Positive	protein_coding	-25766	Distal non-target gene eQTMs
ENSG00000089159	cg25284772	PXN	chr12	-45.3088	8.7789	0.00191562	0.00289759	285109	Positive	protein_coding	-25755	Distal non-target gene eQTMs
ENSG00000113845	cg01663469	TIMMDC1	chr3	-4.69093	0.558837	7.03e-10	1.99e-09	-204288	Negative	protein_coding	-25366	Distal non-target gene eQTMs
ENSG00000188026	cg22040239	RILPL1	chr12	-4.41025	0.377447	2.87e-16	1.49e-15	-81077	Negative	protein_coding	-25109	Distal non-target gene eQTMs
ENSG00000242338	cg24637261	BMS1P4	chr10	-0.84815	0.145713	0.00012332	0.00021133	-64784	Negative	processed_transcript	-25106	Distal non-target gene eQTMs
ENSG00000127124	cg10200609	HIVEP3	chr1	5.53677	0.358095	1.49e-23	1.66e-22	1177081	Positive	protein_coding	-25021	Distal non-target gene eQTMs
ENSG00000107829	cg17773020	FBXW4	chr10	15.4111	1.08899	4.06e-19	2.81e-18	808249	Positive	protein_coding	-24803	Distal non-target gene eQTMs
ENSG00000059915	cg17773020	PSD	chr10	60.3241	5.40131	9.91e-17	5.41e-16	16296	Negative	protein_coding	-24803	Distal non-target gene eQTMs
ENSG00000107874	cg17773020	CUEDC2	chr10	6.49129	0.686205	3.97e-12	1.38e-11	-4332	Positive	protein_coding	-24803	Distal non-target gene eQTMs
ENSG00000148840	cg17773020	PPRC1	chr10	2.49887	0.368332	1.93e-06	3.96e-06	-285919	Negative	protein_coding	-24803	Distal non-target gene eQTMs
ENSG00000167378	cg06872419	IRGQ	chr19	-11.2402	0.659198	1.01e-26	1.6e-25	195139	Positive	protein_coding	-24518	Distal non-target gene eQTMs
ENSG00000105223	cg14465187	PLD3	chr19	58.2382	2.74561	5.46e-38	3.54e-36	-366620	Positive	protein_coding	-24104	Distal non-target gene eQTMs
ENSG00000233622	cg14465187	CYP2T1P	chr19	1.16976	0.0515739	1.67e-35	7.79e-34	-93398	Negative	unitary_pseudogene	-24104	Distal non-target gene eQTMs
ENSG00000160392	cg14465187	C19orf47	chr19	2.80634	0.148223	3.1e-32	8.99e-31	395540	Positive	protein_coding	-24104	Distal non-target gene eQTMs
ENSG00000160460	cg14465187	SPTBN4	chr19	28.9851	1.55655	4.99e-32	1.42e-30	-248835	Negative	protein_coding	-24104	Distal non-target gene eQTMs
ENSG00000090006	cg14465187	LTBP4	chr19	11.7998	0.601966	8.8e-31	2.17e-29	-122193	Negative	protein_coding	-24104	Distal non-target gene eQTMs
ENSG00000128000	cg14465187	ZNF780B	chr19	-45.3149	3.01441	8.02e-23	8.2e-22	686816	Positive	protein_coding	-24104	Distal non-target gene eQTMs
ENSG00000077312	cg14465187	SNRPA	chr19	4.11588	0.285513	1.35e-20	1.09e-19	35561	Negative	protein_coding	-24104	Distal non-target gene eQTMs
ENSG00000269858	cg14465187	EGLN2	chr19	7.25578	0.561869	3.87e-19	2.68e-18	83920	Positive	protein_coding	-24104	Distal non-target gene eQTMs
ENSG00000105329	cg14465187	TGFB1	chr19	1.29213	0.125962	2.81e-09	7.55e-09	-586511	Positive	protein_coding	-24104	Distal non-target gene eQTMs
ENSG00000167565	cg14465187	SERTAD3	chr19	0.581456	0.0887982	0.00011042	0.00019029	274232	Positive	protein_coding	-24104	Distal non-target gene eQTMs
ENSG00000277744	cg19138387	CTC-435M10.12	chr19	-0.362021	0.0694093	0.00494952	0.00713131	-904988	Negative	sense_intronic	-23827	Distal non-target gene eQTMs
ENSG00000269352	cg09712606	PTOV1-AS2	chr19	-7.95484	0.775648	3.83e-11	1.21e-10	-191045	Negative	antisense	-23800	Distal non-target gene eQTMs
ENSG00000073060	cg21673010	SCARB1	chr12	29.8592	4.73273	2.85e-05	5.22e-05	164116	Positive	protein_coding	-23604	Distal non-target gene eQTMs
ENSG00000126456	cg07333040	IRF3	chr19	18.777	2.73624	3.27e-06	6.55e-06	6085	Positive	protein_coding	-23529	Distal non-target gene eQTMs
ENSG00000122970	cg04501943	IFT81	chr12	-10.4643	0.709146	3.52e-23	3.75e-22	-642060	Negative	protein_coding	-23456	Distal non-target gene eQTMs
ENSG00000111249	cg04501943	CUX2	chr12	3.94671	0.276743	5.88e-22	5.48e-21	267770	Positive	protein_coding	-23456	Distal non-target gene eQTMs
ENSG00000111237	cg04501943	VPS29	chr12	-14.6907	1.55872	1.09e-09	3.04e-09	275298	Negative	protein_coding	-23456	Distal non-target gene eQTMs
ENSG00000264364	cg22481606	DYNLL2	chr17	34.0963	4.76481	5.84e-07	1.26e-06	-268787	Positive	protein_coding	-23446	Distal non-target gene eQTMs
ENSG00000136451	cg22481606	VEZF1	chr17	-25.7552	4.57426	0.00019693	0.00033044	380659	Negative	protein_coding	-23446	Distal non-target gene eQTMs
ENSG00000268061	cg14006390	NAPA-AS1	chr19	1.0132	0.152039	6.29e-06	1.23e-05	-984810	Positive	antisense	-23319	Distal non-target gene eQTMs
ENSG00000173621	cg06312776	LRFN4	chr11	5.13851	0.216268	3.16e-38	2.15e-36	-750033	Positive	protein_coding	-23085	Distal non-target gene eQTMs
ENSG00000172725	cg06312776	CORO1B	chr11	15	0.824733	1.22e-30	2.96e-29	171170	Positive	protein_coding	-23085	Distal non-target gene eQTMs
ENSG00000173599	cg06312776	PC	chr11	8.82016	0.521627	1.79e-26	2.75e-25	758263	Positive	protein_coding	-23085	Distal non-target gene eQTMs
ENSG00000110717	cg06312776	NDUFS8	chr11	12.6833	0.787868	7.17e-26	1.03e-24	423937	Negative	protein_coding	-23085	Distal non-target gene eQTMs
ENSG00000162337	cg06312776	LRP5	chr11	10.7837	0.652406	1.33e-25	1.86e-24	705911	Negative	protein_coding	-23085	Distal non-target gene eQTMs
ENSG00000110697	cg06312776	PITPNM1	chr11	84.8852	5.71101	5.89e-23	6.12e-22	114912	Negative	protein_coding	-23085	Distal non-target gene eQTMs
ENSG00000172932	cg06312776	ANKRD13D	chr11	8.4308	0.60072	6.76e-22	6.25e-21	-318133	Positive	protein_coding	-23085	Distal non-target gene eQTMs
ENSG00000110711	cg06312776	AIP	chr11	9.02314	0.662334	1.53e-19	1.11e-18	-123654	Negative	protein_coding	-23085	Distal non-target gene eQTMs
ENSG00000167799	cg06312776	NUDT8	chr11	0.482306	0.0415019	1.72e-15	8.31e-15	-21258	Negative	protein_coding	-23085	Distal non-target gene eQTMs
ENSG00000110066	cg06312776	KMT5B	chr11	-16.8176	1.58689	2.49e-14	1.07e-13	-548183	Negative	protein_coding	-23085	Distal non-target gene eQTMs
ENSG00000171067	cg06312776	C11orf24	chr11	1.97469	0.179634	4.39e-14	1.85e-13	-654658	Negative	protein_coding	-23085	Distal non-target gene eQTMs
ENSG00000167792	cg06312776	NDUFV1	chr11	33.2776	3.53103	9.41e-12	3.17e-11	-1027	Positive	protein_coding	-23085	Distal non-target gene eQTMs
ENSG00000131409	cg05182906	LRRC4B	chr19	12.171	0.518296	2.54e-39	1.9e-37	-851821	Negative	protein_coding	-22946	Distal non-target gene eQTMs
ENSG00000105409	cg04627240	ATP1A3	chr19	631.337	56.8889	8.03e-15	3.64e-14	276113	Positive	protein_coding	-22555	Distal non-target gene eQTMs
ENSG00000213203	cg08116366	GIMAP1	chr7	-0.391272	0.0472809	4.18e-07	9.15e-07	-538005	Negative	protein_coding	-22122	Distal non-target gene eQTMs
ENSG00000106538	cg06400095	RARRES2	chr7	-29.8395	2.56394	1.14e-12	4.2e-12	916230	Negative	protein_coding	-22058	Distal non-target gene eQTMs
ENSG00000172531	cg00636119	PPP1CA	chr11	5.4258	0.556788	8.56e-13	3.18e-12	207298	Positive	protein_coding	-21886	Distal non-target gene eQTMs
ENSG00000184208	cg15291304	C22orf46	chr22	5.12613	0.354167	1.13e-22	1.14e-21	220119	Positive	protein_coding	-21735	Distal non-target gene eQTMs
ENSG00000105519	cg03925809	CAPS	chr19	-5.58443	0.646617	2.11e-09	5.73e-09	-482033	Negative	protein_coding	-20975	Distal non-target gene eQTMs
ENSG00000170265	cg10963209	ZNF282	chr7	-14.8343	0.798308	1.81e-32	5.41e-31	48260	Negative	protein_coding	-20870	Distal non-target gene eQTMs
ENSG00000181220	cg10963209	ZNF746	chr7	-12.1507	0.621173	6.29e-32	1.76e-30	-325410	Negative	protein_coding	-20870	Distal non-target gene eQTMs
ENSG00000171130	cg10963209	ATP6V0E2	chr7	-66.3365	4.31208	1.38e-25	1.93e-24	725682	Positive	protein_coding	-20870	Distal non-target gene eQTMs
ENSG00000133619	cg10963209	KRBA1	chr7	-12.7532	0.86417	4.67e-24	5.54e-23	567495	Positive	protein_coding	-20870	Distal non-target gene eQTMs
ENSG00000197558	cg10963209	SSPO	chr7	-63.4174	4.10849	8.96e-24	1.02e-22	628756	Negative	protein_coding	-20870	Distal non-target gene eQTMs
ENSG00000204946	cg10963209	ZNF783	chr7	-5.71583	0.533082	4.01e-14	1.69e-13	114885	Positive	protein_coding	-20870	Distal non-target gene eQTMs
ENSG00000189136	cg16203863	UBE2Q2P1	chr15	-1.00678	0.168403	1.21e-05	2.3e-05	127963	Negative	transcribed_unprocessed_pseudogene	-20757	Distal non-target gene eQTMs
ENSG00000031823	cg12589600	RANBP3	chr19	-22.0135	1.44409	6.36e-24	7.4e-23	477027	Negative	protein_coding	-20733	Distal non-target gene eQTMs
ENSG00000157741	cg21373064	UBN2	chr7	36.2756	2.38791	1.08e-24	1.36e-23	-129343	Positive	protein_coding	-20242	Distal non-target gene eQTMs
ENSG00000105948	cg21373064	TTC26	chr7	3.07545	0.248952	6.04e-18	3.73e-17	-225955	Positive	protein_coding	-20242	Distal non-target gene eQTMs
ENSG00000146963	cg21373064	LUC7L2	chr7	15.4112	1.91006	2.26e-08	5.57e-08	-19340	Positive	protein_coding	-20242	Distal non-target gene eQTMs
ENSG00000204815	cg17899716	TTC25	chr17	-1.19694	0.249444	0.0177795	0.0237587	123775	Negative	protein_coding	-19911	Distal non-target gene eQTMs
ENSG00000174292	cg26213471	TNK1	chr17	2.23482	0.448922	0.00394995	0.00575386	140932	Positive	protein_coding	-19900	Distal non-target gene eQTMs
ENSG00000276698	cg18473335	RP11-468E2.10	chr14	0.444289	0.0972464	0.0106323	0.0146686	127468	Positive	lincRNA	-18965	Distal non-target gene eQTMs
ENSG00000171606	cg13923040	ZNF274	chr19	-10.581	0.659063	6.87e-25	8.81e-24	-390949	Negative	protein_coding	-18854	Distal non-target gene eQTMs
ENSG00000152475	cg19609315	ZNF837	chr19	0.462986	0.0233197	1.22e-31	3.31e-30	206261	Positive	protein_coding	-18755	Distal non-target gene eQTMs
ENSG00000103742	cg13754255	IGDCC4	chr15	-5.59577	0.773688	6.69e-07	1.43e-06	-247620	Negative	protein_coding	-18667	Distal non-target gene eQTMs
ENSG00000125821	cg05921762	DTD1	chr20	2.30589	0.513883	0.0077002	0.0108178	1923	Positive	protein_coding	-18623	Distal non-target gene eQTMs
ENSG00000083814	cg11686214	ZNF671	chr19	3.75253	0.285323	3.85e-19	2.67e-18	853866	Negative	protein_coding	-18493	Distal non-target gene eQTMs
ENSG00000121417	cg15191848	ZNF211	chr19	7.65113	0.852514	1.91e-11	6.24e-11	-943180	Positive	protein_coding	-18451	Distal non-target gene eQTMs
ENSG00000196724	cg15191848	ZNF418	chr19	5.04922	0.573043	1.3e-10	3.93e-10	651691	Positive	protein_coding	-18451	Distal non-target gene eQTMs
ENSG00000130202	cg12950624	NECTIN2	chr19	-13.3042	0.836604	5.71e-24	6.69e-23	-650721	Negative	protein_coding	-18068	Distal non-target gene eQTMs
ENSG00000130208	cg12067547	APOC1	chr19	3.2164	0.630035	0.0183394	0.0244567	-967610	Positive	protein_coding	-17868	Distal non-target gene eQTMs
ENSG00000140382	cg21733597	HMG20A	chr15	11.0844	1.21312	1.51e-11	4.98e-11	-728941	Negative	protein_coding	-17809	Distal non-target gene eQTMs
ENSG00000204869	cg14200826	IGFL4	chr19	38.2776	4.79705	1.42e-07	3.25e-07	-543212	Positive	protein_coding	-17708	Distal non-target gene eQTMs
ENSG00000278737	cg25415342	RP11-325L12.7	chr15	4.50878	1.06609	0.0238871	0.0314327	-709082	Positive	lincRNA	-17701	Distal non-target gene eQTMs
ENSG00000239306	cg19568845	RBM14	chr11	-13.3058	2.34751	0.0003222	0.00052987	189985	Negative	protein_coding	-17439	Distal non-target gene eQTMs
ENSG00000140299	cg14533361	BNIP2	chr15	22.1948	3.94178	0.00019845	0.00033283	30449	Positive	protein_coding	-17293	Distal non-target gene eQTMs
ENSG00000027847	cg14673162	B4GALT7	chr5	2.98796	0.256589	1.67e-16	8.91e-16	952828	Positive	protein_coding	-16748	Distal non-target gene eQTMs
ENSG00000153391	cg09077048	INO80C	chr18	2.69712	0.613597	0.00875075	0.012204	861978	Positive	protein_coding	-16494	Distal non-target gene eQTMs
ENSG00000136404	cg13418632	TM6SF1	chr15	1.88121	0.356751	0.0005901	0.00094444	443565	Positive	protein_coding	-16072	Distal non-target gene eQTMs
ENSG00000101337	cg03352975	TM9SF4	chr20	-4.88795	1.17736	0.028642	0.0373126	369880	Positive	protein_coding	-15637	Distal non-target gene eQTMs
ENSG00000140403	cg21715896	DNAJA4	chr15	-10.4863	1.2013	1.06e-06	2.23e-06	117040	Negative	protein_coding	-15502	Distal non-target gene eQTMs
ENSG00000083817	cg22801907	ZNF416	chr19	2.17813	0.235552	5.92e-11	1.84e-10	999012	Positive	protein_coding	-15454	Distal non-target gene eQTMs
ENSG00000125968	cg09877164	ID1	chr20	11.3125	1.10788	1.61e-09	4.43e-09	-133782	Positive	protein_coding	-15076	Distal non-target gene eQTMs
ENSG00000273137	cg19216490	RP3-402G11.28	chr22	-0.527007	0.0386932	1.16e-19	8.53e-19	-7672	Negative	antisense	-14874	Distal non-target gene eQTMs
ENSG00000273188	cg19216490	RP3-402G11.25	chr22	-0.372655	0.0321859	7.43e-15	3.38e-14	9065	Negative	antisense	-14874	Distal non-target gene eQTMs
ENSG00000108830	cg27063449	RND2	chr17	3.18089	0.537282	0.00017633	0.0002975	-378624	Positive	protein_coding	-14656	Distal non-target gene eQTMs
ENSG00000141646	cg08859858	SMAD4	chr18	-16.5568	1.48574	3.72e-16	1.92e-15	747261	Negative	protein_coding	-14611	Distal non-target gene eQTMs
ENSG00000253392	cg24809037	AC006277.2	chr19	-0.317885	0.0269895	5.42e-13	2.06e-12	153848	Negative	antisense	-14584	Distal non-target gene eQTMs
ENSG00000214575	cg12580585	CPEB1	chr15	5.13967	0.93457	0.00025198	0.00041865	118497	Positive	protein_coding	-13928	Distal non-target gene eQTMs
ENSG00000088854	cg22620895	C20orf194	chr20	-16.5258	1.09841	1.92e-23	2.11e-22	532299	Positive	protein_coding	-13217	Distal non-target gene eQTMs
ENSG00000171124	cg05306773	FUT3	chr19	-19.2579	3.90277	0.00706714	0.00998192	8717	Negative	protein_coding	-11874	Distal non-target gene eQTMs
ENSG00000267709	cg18006622	AC024592.9	chr19	-0.613117	0.0879302	0.00042773	0.00069554	-4126	Negative	antisense	-11862	Distal non-target gene eQTMs
ENSG00000104164	cg27271756	BLOC1S6	chr15	26.9926	3.06325	7.77e-11	2.39e-10	64157	Positive	protein_coding	-11830	Distal non-target gene eQTMs
ENSG00000137770	cg27271756	CTDSPL2	chr15	26.0636	3.42637	4.8e-08	1.15e-07	-1095344	Negative	protein_coding	-11830	Distal non-target gene eQTMs
ENSG00000140450	cg00348254	ARRDC4	chr15	-2.86104	0.2366	8.47e-18	5.17e-17	-698682	Negative	protein_coding	-10414	Distal non-target gene eQTMs
ENSG00000091513	cg11792562	TF	chr3	-3289.1	634.34	0.00348364	0.00511102	-620894	Negative	protein_coding	-10373	Distal non-target gene eQTMs
ENSG00000135744	cg03525122	AGT	chr1	12.1652	1.53126	1.25e-08	3.16e-08	-634487	Positive	protein_coding	-10046	Distal non-target gene eQTMs
ENSG00000278177	cg17351439	RP11-632L2.2	chr13	-0.263364	0.0406888	5.3e-07	1.15e-06	9202	Negative	antisense	-8972	Distal non-target gene eQTMs
ENSG00000172817	cg07893575	CYP7B1	chr8	6.77436	0.225803	1.42e-52	8.32e-50	-210569	Positive	protein_coding	-8636	Distal non-target gene eQTMs
ENSG00000119777	cg14462928	TMEM214	chr2	-8.28179	1.22861	7.64e-06	1.48e-05	-17424	Negative	protein_coding	-7970	Distal non-target gene eQTMs
ENSG00000226849	cg05390356	RP4-635E18.7	chr1	-0.185846	0.0285177	8.64e-06	1.67e-05	850546	Negative	antisense	-7120	Distal non-target gene eQTMs
ENSG00000075151	cg03177642	EIF4G3	chr1	25.3194	2.58863	2.42e-12	8.59e-12	546185	Positive	protein_coding	-6973	Distal non-target gene eQTMs
ENSG00000170743	cg00969147	SYT9	chr11	3.31788	0.45798	2.54e-07	5.67e-07	-787180	Positive	protein_coding	-6714	Distal non-target gene eQTMs
ENSG00000186352	cg01826897	ANKRD37	chr4	97.5245	13.2977	6.73e-07	1.44e-06	185536	Positive	protein_coding	-6248	Distal non-target gene eQTMs
ENSG00000254377	cg06829299	MIR124-2HG	chr8	-69.9395	15.2799	0.00391496	0.00570526	-924	Positive	lincRNA	-5517	Distal non-target gene eQTMs
ENSG00000117410	cg04563783	ATP6V0B	chr1	15.5877	2.83809	0.00034256	0.00056198	22591	Positive	protein_coding	-4957	Distal non-target gene eQTMs
ENSG00000162430	cg20385686	SEPN1	chr1	44.9618	3.83767	1.42e-12	5.16e-12	-897784	Positive	protein_coding	-4724	Distal non-target gene eQTMs
ENSG00000067369	cg14205524	TP53BP1	chr15	-17.7147	1.18401	4.73e-23	4.99e-22	-907313	Positive	protein_coding	-4515	Distal non-target gene eQTMs
[truncated: 1,396 more rows]
