# Supplementary material for: QTL mapping of human retina DNA methylation identifies 87 gene-epigenome interactions in age-related macular degeneration
Source: Nat Commun. 2024 Mar 4;15:1972. doi: 10.1038/s41467-024-46063-8 (PMC10912779; doi:10.1038/s41467-024-46063-8)
Supplement: Supplementary file 33 — Supplementary Data 30 [file 41467_2024_46063_MOESM33_ESM.xlsx]

## Sheet: CRE
CpG	chr	CpG_start	CpG_end	snp	hg38_pos_start	hg38_pos_end	Rank	Backward_nom_pval	Backward_slope	Backward_slope_se	Retina_specific	TSS-variant_Distance	Type
cg24544113	chr1	904056	904055	rs4475691	911428	911428	0	1.54301e-12	-0.367056	0.0475621	FALSE	7	Promoter non-mGene mQTLs
cg19693677	chr1	923168	923167	1:860788:TTGGCGC:T	925408	925414	0	4.07521e-08	-0.514408	0.0889163	TRUE	-1480	Promoter non-mGene mQTLs
cg00582671	chr1	936856	936855	rs4504834:871683:G:A	936303	936303	0	1.37788e-08	-0.223936	0.037286	TRUE	-12375	Distal mGene mQTLs
cg13900770	chr1	961384	961383	exm2253575	946247	946247	0	1.03488e-06	-0.0922182	0.0181004	TRUE	13062	Distal non-mGene mQTLs
cg23364470	chr1	976222	976221	rs7417106:911595:A:G	976215	976215	1	7.15991e-08	0.827101	0.145907	TRUE	-9718	Distal non-mGene mQTLs
cg26339484	chr1	1000484	1000483	rs3121571:935492:G:T	1000112	1000112	0	2.88677e-24	0.400195	0.0327525	FALSE	60	Promoter mGene mQTLs
cg26457504	chr1	1068376	1068375	rs4246502:1002932:C:G	1067552	1067552	0	2.32709e-29	0.48628	0.0344151	FALSE	-7818	Distal non-mGene mQTLs
cg09200014	chr1	1068472	1068471	rs4246502:1002932:C:G	1067552	1067552	0	1.22554e-07	0.121408	0.0218511	FALSE	-7818	Distal non-mGene mQTLs
cg26270573	chr1	1137263	1137262	rs56956005:1072613:C:G	1137233	1137233	0	4.68375e-18	0.295975	0.0299408	TRUE	-216	Promoter non-mGene mQTLs
cg22047469	chr1	1174728	1174727	rs11260537:1109554:G:C	1174174	1174174	0	3.048e-13	0.496753	0.0620608	FALSE	-290	Promoter mGene mQTLs
cg17405058	chr1	1301824	1301823	rs11260584:1239339:T:G	1303959	1303959	0	8.09858e-12	0.39203	0.0528367	FALSE	5650	Distal mGene mQTLs
cg04360793	chr1	1369791	1369790	rs12410087:1239935:A:C	1304555	1304555	0	1.00701e-18	0.310028	0.0305777	FALSE	4012	Distal non-mGene mQTLs
cg16014655	chr1	1358761	1358760	rs1810745:1257593:A:G	1322213	1322213	0	9.80233e-09	0.306763	0.0505023	TRUE	2478	Promoter non-mGene mQTLs
cg23796177	chr1	1358974	1358973	rs1810745:1257593:A:G	1322213	1322213	0	2.41654e-07	0.261784	0.0483709	TRUE	2478	Promoter non-mGene mQTLs
cg12731349	chr1	1358886	1358885	rs150789461:1284490:G:A	1349110	1349110	0	4.42981e-14	0.383361	0.0459634	TRUE	240	Promoter non-mGene mQTLs
cg18546249	chr1	1375649	1375648	rs9730511:1311542:G:C	1376162	1376162	0	3.6659e-26	-0.263417	0.0203761	TRUE	-667	Promoter mGene mQTLs
cg24553170	chr1	1421349	1421348	rs1781133:1355583:C:A	1420203	1420203	0	4.95246e-09	0.337323	0.0543197	TRUE	42	Promoter non-mGene mQTLs
cg20229934	chr1	1604544	1604543	exm3962	1616547	1616547	0	7.46912e-07	-0.143097	0.0276944	TRUE	-1132	Promoter non-mGene mQTLs
cg00930781	chr1	1878157	1878156	rs11260629:1705945:T:C	1774506	1774506	0	4.60612e-08	-0.149075	0.0258808	FALSE	5951	Distal non-mGene mQTLs
cg15827003	chr1	1891474	1891473	GIANT-BMI-Euro-Sex-Combined_chr1_1723031	1791592	1791592	0	6.55571e-08	0.216549	0.0380776	FALSE	168086	Distal mGene mQTLs
cg18947954	chr1	1944365	1944364	rs2803332:1875513:T:C	1944074	1944074	0	7.75108e-26	-0.504581	0.0394018	FALSE	59763	Distal non-mGene mQTLs
cg23656015	chr1	1944342	1944341	rs2803333:1875530:G:C	1944091	1944091	0	2.22017e-26	-0.596395	0.0458438	FALSE	59746	Distal non-mGene mQTLs
cg03580279	chr1	2084536	2084535	rs2490561:2023504:T:C	2092065	2092065	0	5.07945e-13	-0.203106	0.0256628	FALSE	-41595	Distal mGene mQTLs
cg08510499	chr1	2139964	2139963	rs3128293:2065339:A:G	2133900	2133900	0	5.48146e-08	-0.160144	0.0279769	TRUE	-83430	Distal mGene mQTLs
cg12396368	chr1	2207515	2207514	rs145625268:2087035:GTGA:G	2155596	2155599	0	2.41564e-11	-0.291998	0.0404397	TRUE	-105126	Distal non-mGene mQTLs
cg21211271	chr1	2194541	2194540	rs34825103:2120733:T:TG	2189294	2189294	0	2.79533e-11	0.173562	0.0241266	TRUE	23426	Distal non-mGene mQTLs
cg11224984	chr1	2271607	2271606	rs263531:2164935:G:T	2233496	2233496	0	1.94839e-12	-0.1453	0.0189295	FALSE	-4801	Distal mGene mQTLs
cg17175521	chr1	1468694	1468693	rs61776614:2166406:C:T	2234967	2234967	0	1.63526e-06	-0.161838	0.0324167	TRUE	-6272	Distal non-mGene mQTLs
cg02185870	chr1	2237791	2237790	rs34974355:2166484:A:AT	2235045	2235045	0	3.41925e-09	0.175422	0.0279205	TRUE	-6350	Distal mGene mQTLs
cg26566407	chr1	2271493	2271492	rs260512:2182470:G:A	2251031	2251031	0	7.63082e-10	-0.149632	0.0227616	FALSE	-22336	Distal mGene mQTLs
cg12936238	chr1	2323144	2323143	rs2843149:2254516:G:A	2323077	2323077	0	5.41249e-08	-0.213621	0.0373021	TRUE	68630	Distal mGene mQTLs
cg23162821	chr1	3267624	3267623	rs71630976:2322726:G:A	2391287	2391287	0	3.43467e-07	0.296514	0.0555643	TRUE	420	Promoter non-mGene mQTLs
cg04111102	chr1	2393149	2393148	rs2494597:2343194:T:C	2411755	2411755	0	1.2086e-08	0.298685	0.0495145	FALSE	2042	Promoter non-mGene mQTLs
cg06824523	chr1	2480174	2480173	rs6687012:2375844:T:G	2444405	2444405	0	8.89755e-11	-0.188294	0.0269772	FALSE	-18425	Distal mGene mQTLs
cg09073508	chr1	3531711	3531710	rs3927735:3447914:G:C	3531350	3531350	0	2.17904e-08	0.206658	0.0349483	TRUE	80145	Distal mGene mQTLs
cg09686010	chr1	3531719	3531718	rs28447582:3448360:G:A	3531796	3531796	0	3.60425e-15	0.346371	0.0394891	FALSE	79699	Distal mGene mQTLs
cg10013316	chr1	3611064	3611063	rs60020855:3528292:GC:G	3611728	3611729	0	2.14788e-08	-0.11811	0.019964	TRUE	-233	Promoter mGene mQTLs
cg26105278	chr1	3707491	3707490	rs3819967	3716816	3716816	0	3.01184e-08	-0.143152	0.0244818	FALSE	-64296	Distal mGene mQTLs
cg01096738	chr1	5993683	5993682	rs141175835:6052074:C:CCCA	5992014	5992014	0	3.17322e-15	-0.132937	0.0151185	TRUE	459	Promoter mGene mQTLs
cg19180828	chr1	6205161	6205160	rs4908540:6266096:A:G	6206036	6206036	0	1.31372e-25	0.561588	0.044149	FALSE	-561	Promoter mGene mQTLs
cg23988737	chr1	6236662	6236661	rs4908865:6269340:A:G	6209280	6209280	0	6.16384e-10	-0.674299	0.101939	FALSE	109	Promoter non-mGene mQTLs
cg04434328	chr1	6520114	6520113	rs4908904:6580250:C:T	6520190	6520190	0	1.1179e-14	0.176264	0.0205489	FALSE	-129	Promoter mGene mQTLs
cg08163621	chr1	6625937	6625936	rs6684534:6686022:G:C	6625962	6625962	0	1.51197e-12	0.611643	0.0792177	FALSE	-1096	Promoter mGene mQTLs
cg03765258	chr1	7150889	7150888	rs11587739:7211045:A:G	7150985	7150985	0	5.39259e-19	-0.288021	0.0281221	FALSE	-365661	Distal mGene mQTLs
cg00911446	chr1	7460020	7460019	rs1725235:7520129:C:T	7460069	7460069	0	7.183e-09	-0.190923	0.0311139	FALSE	-674745	Distal mGene mQTLs
cg20681877	chr1	7461091	7461090	rs11805932	7461419	7461419	0	3.77288e-07	-0.343984	0.0647059	TRUE	-676095	Distal mGene mQTLs
cg09696653	chr1	7705294	7705293	rs12119962:7742501:C:T	7682441	7682441	0	3.58071e-17	0.218173	0.0228509	FALSE	-897117	Distal mGene mQTLs
cg25763306	chr1	7681157	7681156	rs12747548:7744856:T:C	7684796	7684796	0	1.50593e-31	0.888834	0.0594085	FALSE	-899472	Distal mGene mQTLs
cg24306142	chr1	8168324	8168323	rs149997714:7761132:T:C	7701072	7701072	0	1.89827e-07	0.481085	0.0880541	TRUE	-102	Promoter non-mGene mQTLs
cg11633926	chr1	7671947	7671946	rs2995035:7775092:G:C	7715032	7715032	0	1.73983e-07	-0.125326	0.0228612	TRUE	-929708	Distal mGene mQTLs
cg27642159	chr1	6806897	6806896	rs142501097:7780245:CT:C	7720185	7720186	0	8.93038e-07	-0.539662	0.105248	TRUE	-934861	Distal mGene mQTLs
cg23228279	chr1	7697315	7697314	rs34351762:7782533:C:CAGTT	7722473	7722473	0	1.14391e-08	-0.116776	0.0193232	FALSE	-937149	Distal mGene mQTLs
cg25007680	chr1	7961762	7961761	rs226249:8021778:T:C	7961718	7961718	0	4.00789e-07	0.0629845	0.0118771	FALSE	-7427	Distal mGene mQTLs
cg00845930	chr1	7961878	7961877	rs200968609:8021910:GGTGCTGGACGGTGTCCCT:G	7961850	7961868	0	2.42899e-26	1.04121	0.0801258	TRUE	-7559	Distal mGene mQTLs
cg10385390	chr1	7962446	7962445	rs200968609:8021910:GGTGCTGGACGGTGTCCCT:G	7961850	7961868	0	6.96161e-09	-0.162176	0.0264024	TRUE	-7559	Distal mGene mQTLs
cg00042356	chr1	7961903	7961902	exm-rs35675666	7961913	7961913	0	1.03409e-16	0.355208	0.0379065	FALSE	-7622	Distal mGene mQTLs
cg08395640	chr1	8031676	8031675	rs11589090:8525615:C:T	8465555	8465555	0	4.50193e-07	0.150446	0.0285055	TRUE	352088	Distal non-mGene mQTLs
cg20609715	chr1	8598523	8598522	rs80243135:8542448:A:C	8482388	8482388	0	2.56119e-07	0.12418	0.0229983	FALSE	335255	Distal mGene mQTLs
cg24276315	chr1	8483177	8483176	rs34947776:8586352:CT:C	8526293	8526294	0	2.78708e-10	-0.151586	0.0224054	TRUE	291350	Distal mGene mQTLs
cg18507560	chr1	8526239	8526238	rs2297867	8526504	8526504	0	2.22709e-20	0.228542	0.0212324	FALSE	291139	Distal mGene mQTLs
cg25722041	chr1	8563415	8563414	rs113605276:8623490:C:T	8563431	8563431	0	6.77875e-11	0.374244	0.0532329	FALSE	254212	Distal mGene mQTLs
cg06867363	chr1	9196283	9196282	rs4908823	9196141	9196141	0	3.73885e-18	0.243522	0.0245421	FALSE	842	Promoter non-mGene mQTLs
cg09122657	chr1	9234855	9234854	rs11121349:9295794:G:C	9235735	9235735	0	1.30033e-16	0.208538	0.0223459	FALSE	-960	Promoter mGene mQTLs
cg25284492	chr1	9235374	9235373	rs11121349:9295794:G:C	9235735	9235735	0	4.76229e-07	0.142709	0.0271024	TRUE	-960	Promoter mGene mQTLs
cg26573321	chr1	9651606	9651605	rs7516214:9711674:A:G	9651616	9651616	0	7.81678e-09	0.14763	0.0241249	FALSE	116	Promoter mGene mQTLs
cg22245096	chr1	9842930	9842929	rs12725898:9903548:G:T	9843490	9843490	0	1.6915e-07	0.0929231	0.016932	FALSE	4828	Distal non-mGene mQTLs
cg16050974	chr1	9997643	9997642	rs11121513:10057706:G:A	9997648	9997648	0	4.26463e-16	0.333635	0.0365317	FALSE	-442	Promoter mGene mQTLs
cg11060701	chr1	10665276	10665275	rs111473432:10288104:G:A	10228046	10228046	0	2.07632e-08	-0.34555	0.0583399	TRUE	-328	Promoter non-mGene mQTLs
cg15888996	chr1	10430750	10430749	rs6662684:10490789:G:C	10430732	10430732	0	1.69585e-36	0.82824	0.0490673	TRUE	-630	Promoter mGene mQTLs
cg07221201	chr1	10428225	10428224	rs481571	10430824	10430824	0	1.60078e-16	0.148009	0.0159194	FALSE	-722	Promoter non-mGene mQTLs
cg23551924	chr1	10430239	10430238	rs481571	10430824	10430824	0	5.23557e-12	0.157178	0.0209613	FALSE	-722	Promoter mGene mQTLs
cg12806121	chr1	10541333	10541332	rs60354536:10569000:C:CT	10508943	10508943	0	1.41922e-21	-0.427167	0.0380973	TRUE	-36655	Distal mGene mQTLs
cg12830684	chr1	10553484	10553483	rs60354536:10569000:C:CT	10508943	10508943	0	1.97553e-23	-0.577583	0.0485089	TRUE	-36655	Distal mGene mQTLs
cg05454781	chr1	10591288	10591287	rs60354536:10569000:C:CT	10508943	10508943	0	4.12035e-19	-0.252622	0.0245597	TRUE	-36655	Distal mGene mQTLs
cg01834541	chr1	10591745	10591744	rs60354536:10569000:C:CT	10508943	10508943	0	7.44014e-31	-0.575182	0.0391363	TRUE	-36655	Distal mGene mQTLs
cg12944311	chr1	10599850	10599849	rs60354536:10569000:C:CT	10508943	10508943	0	4.1759e-14	-0.319009	0.038201	TRUE	-36655	Distal mGene mQTLs
cg09319435	chr1	10626219	10626218	rs60354536:10569000:C:CT	10508943	10508943	0	1.4766e-20	-0.265763	0.0245374	TRUE	-36655	Distal mGene mQTLs
cg06080068	chr1	10507743	10507742	rs3215946:10574185:GA:G	10514128	10514129	0	5.9613e-20	0.291277	0.0274714	TRUE	-41840	Distal mGene mQTLs
cg24294013	chr1	10541777	10541776	rs2483677:10580891:C:T	10520834	10520834	0	1.20255e-18	-0.429847	0.0425178	FALSE	-48546	Distal mGene mQTLs
cg01063935	chr1	10556029	10556028	rs2483677:10580891:C:T	10520834	10520834	0	8.85851e-19	-0.384781	0.0378716	FALSE	-48546	Distal mGene mQTLs
cg23987244	chr1	10594962	10594961	rs2483677:10580891:C:T	10520834	10520834	0	2.71976e-22	-0.490319	0.0427068	FALSE	-48546	Distal mGene mQTLs
cg15554126	chr1	10630387	10630386	rs2483677:10580891:C:T	10520834	10520834	0	4.64727e-18	-0.269839	0.0272932	FALSE	-48546	Distal mGene mQTLs
cg07357157	chr1	10630532	10630531	rs2483677:10580891:C:T	10520834	10520834	0	4.27838e-19	-0.22167	0.0215636	FALSE	-48546	Distal mGene mQTLs
cg23072051	chr1	10605459	10605458	rs2506885:10581051:A:T	10520994	10520994	0	7.18122e-11	-0.180915	0.0257728	TRUE	-48706	Distal mGene mQTLs
cg04607379	chr1	10616778	10616777	rs2026792:10594790:A:G	10534733	10534733	0	5.43201e-20	-0.360861	0.0339854	FALSE	-62445	Distal mGene mQTLs
cg26362368	chr1	10615567	10615566	rs2506892:10598216:G:A	10538159	10538159	0	1.32246e-22	-0.527352	0.0454686	FALSE	-65871	Distal mGene mQTLs
cg27182133	chr1	10598091	10598090	rs2150038:10609973:G:T	10549916	10549916	0	1.41743e-10	-0.203456	0.0295171	FALSE	-77628	Distal mGene mQTLs
cg22608619	chr1	10643175	10643174	rs146039805:10703203:G:GC	10643146	10643146	0	1.09419e-19	0.427391	0.0406903	FALSE	153504	Distal mGene mQTLs
cg18878351	chr1	10649287	10649286	rs1796630:10711278:C:T	10651221	10651221	0	3.33844e-09	-0.212258	0.033758	FALSE	145429	Distal mGene mQTLs
cg07643626	chr1	10785805	10785804	rs6660242:10845840:G:A	10785783	10785783	0	1.2231e-07	-0.174589	0.0314201	FALSE	10867	Distal mGene mQTLs
cg17523053	chr1	11594905	11594904	rs140223564:11560335:A:T	11500278	11500278	0	1.22968e-07	0.457964	0.082435	TRUE	-21112	Distal non-mGene mQTLs
cg05796704	chr1	11654162	11654161	rs5772465:11714883:G:GGCGGGGC	11654826	11654826	0	2.27562e-07	0.19088	0.0351862	TRUE	-451	Promoter mGene mQTLs
cg14942617	chr1	11909905	11909904	1:11968358:T:G	11908301	11908301	0	1.21185e-22	1.01263	0.0872026	TRUE	-149	Promoter non-mGene mQTLs
cg00937131	chr1	11908533	11908532	rs12403427:11968570:C:T	11908513	11908513	0	6.08746e-09	0.151731	0.0245953	FALSE	-361	Promoter non-mGene mQTLs
cg26608693	chr1	13701087	13701086	rs139517091:14027737:TC:T	13701242	13701243	0	1.75469e-14	-0.351698	0.0413744	FALSE	-1044	Promoter mGene mQTLs
cg19728577	chr1	14945457	14945456	rs6687730:15288613:G:C	14962117	14962117	0	1.79334e-14	0.243772	0.0286904	FALSE	-1069325	Distal non-mGene mQTLs
cg14258148	chr1	14945265	14945264	rs6687730:15288613:G:C	14962117	14962117	0	5.42482e-07	0.127324	0.0243117	FALSE	-1069325	Distal mGene mQTLs
cg24349832	chr1	15152353	15152352	rs35890014:15479259:AG:A	15152763	15152764	0	1.46366e-09	-0.132627	0.0205674	FALSE	-231	Promoter mGene mQTLs
cg00188746	chr1	15153763	15153762	rs5772620:15480026:G:GC	15153530	15153530	0	1.3894e-29	0.37649	0.0264862	FALSE	-998	Promoter mGene mQTLs
cg20050767	chr1	15272405	15272404	rs55822521:15581004:G:GGGT	15254508	15254508	0	9.59557e-19	0.151396	0.0149203	TRUE	-7236	Distal mGene mQTLs
cg12569845	chr1	15585231	15585230	rs76986450:15852060:GA:G	15525565	15525566	0	2.80675e-10	-0.13803	0.0204058	TRUE	969	Promoter non-mGene mQTLs
cg18379824	chr1	15524476	15524475	rs4593819:15852739:C:G	15526244	15526244	0	9.39358e-37	0.664642	0.0391406	FALSE	290	Promoter mGene mQTLs
cg12101479	chr1	15501581	15501580	1:15956091:CAA:C	15629596	15629598	0	3.49569e-08	0.131141	0.0225452	TRUE	-12096	Distal non-mGene mQTLs
cg16109817	chr1	15835715	15835714	rs6666548:16162554:G:C	15836059	15836059	0	1.75285e-25	0.460508	0.0363364	FALSE	12088	Distal mGene mQTLs
cg10205764	chr1	16013353	16013352	rs1572381:16344494:G:A	16017999	16017999	0	3.05688e-15	-0.137279	0.0156011	FALSE	876	Promoter non-mGene mQTLs
cg20430773	chr1	16207663	16207662	rs221053:16533096:C:T	16206601	16206601	0	1.13902e-30	-0.447331	0.0305835	FALSE	6008	Distal mGene mQTLs
cg20281040	chr1	16206569	16206568	rs221062:16536548:G:A	16210053	16210053	0	9.45191e-30	0.345257	0.0241813	FALSE	2556	Distal mGene mQTLs
cg27529520	chr1	17112235	17112234	rs1022579:17439195:A:C	17112700	17112700	0	3.8167e-21	0.667469	0.0603963	FALSE	6735	Distal mGene mQTLs
cg16835277	chr1	17113791	17113790	rs1022579:17439195:A:C	17112700	17112700	0	5.10958e-14	0.330063	0.0396908	FALSE	6735	Distal mGene mQTLs
cg25960632	chr1	17119824	17119823	rs12130579:17443793:T:A	17117298	17117298	0	1.41837e-07	0.285968	0.0517558	TRUE	2137	Promoter mGene mQTLs
cg21838303	chr1	17237463	17237462	rs2977306:17563967:T:C	17237472	17237472	0	9.78241e-12	-0.228776	0.0309768	TRUE	-32346	Distal mGene mQTLs
cg07240000	chr1	17552044	17552043	rs2256114:17887963:T:C	17561468	17561468	0	9.08834e-12	0.148942	0.0201307	FALSE	-21633	Distal mGene mQTLs
cg09390181	chr1	18106699	18106698	rs78116078:18434125:C:G	18107631	18107631	0	2.50872e-09	0.187866	0.0296151	FALSE	115	Promoter mGene mQTLs
cg11232944	chr1	18107079	18107078	rs78116078:18434125:C:G	18107631	18107631	0	3.23547e-21	0.324668	0.0293065	FALSE	115	Promoter mGene mQTLs
cg08844966	chr1	18108751	18108750	rs78116078:18434125:C:G	18107631	18107631	0	3.05789e-09	-0.0825289	0.0130898	FALSE	115	Promoter mGene mQTLs
cg06163573	chr1	18175998	18175997	rs78116078:18434125:C:G	18107631	18107631	0	2.79612e-09	-0.154209	0.024391	FALSE	115	Promoter mGene mQTLs
cg25920064	chr1	18480733	18480732	rs2992755:18807897:C:G	18481403	18481403	0	1.82679e-09	-0.131759	0.0205701	FALSE	-421	Promoter mGene mQTLs
cg15311933	chr1	19312404	19312403	rs2473808:19638883:T:C	19312389	19312389	0	3.84446e-07	0.0938113	0.0176601	FALSE	-63	Promoter mGene mQTLs
cg22512634	chr1	19463347	19463346	rs1875325:19781545:G:T	19455051	19455051	0	5.54368e-11	0.173882	0.0246027	FALSE	30488	Distal mGene mQTLs
cg01646665	chr1	19600357	19600356	rs4912130:19923313:T:A	19596819	19596819	0	9.22291e-12	-0.222746	0.0301167	FALSE	13	Promoter non-mGene mQTLs
cg16114773	chr1	19882969	19882968	rs10799592:20212747:G:T	19886254	19886254	0	6.82343e-08	0.122926	0.0216467	FALSE	-3741	Distal mGene mQTLs
cg13463492	chr1	20290459	20290458	rs146664173:20617079:G:C	20290586	20290586	0	3.02069e-10	0.327259	0.0484801	FALSE	333	Promoter mGene mQTLs
cg20498456	chr1	20290870	20290869	rs146664173:20617079:G:C	20290586	20290586	0	1.87408e-12	0.35051	0.045623	FALSE	333	Promoter mGene mQTLs
cg05242270	chr1	20359119	20359118	rs72969004:20693887:C:T	20367394	20367394	0	2.01559e-08	0.219342	0.0369944	FALSE	63840	Distal non-mGene mQTLs
cg21184320	chr1	20717715	20717714	rs601392:21044219:A:C	20717726	20717726	0	1.11289e-12	0.30519	0.03925	FALSE	291	Promoter mGene mQTLs
cg05364829	chr1	21345418	21345417	rs2072654:21671943:T:G	21345450	21345450	0	5.39857e-09	0.125071	0.0201958	FALSE	54	Promoter mGene mQTLs
cg02582404	chr1	21346355	21346354	rs2072654:21671943:T:G	21345450	21345450	0	1.20627e-09	-0.212748	0.0328022	FALSE	54	Promoter mGene mQTLs
cg22943875	chr1	21550830	21550829	rs1256344:21874042:C:G	21547549	21547549	0	1.69366e-17	-0.558736	0.0577668	FALSE	-38177	Distal mGene mQTLs
cg12062270	chr1	21551032	21551031	rs1256344:21874042:C:G	21547549	21547549	0	1.87512e-17	-0.61446	0.0636393	FALSE	-38177	Distal mGene mQTLs
cg06346857	chr1	21551087	21551086	rs1256344:21874042:C:G	21547549	21547549	0	2.72106e-10	-0.313518	0.0463091	FALSE	-38177	Distal mGene mQTLs
cg01037895	chr1	21551289	21551288	rs1256344:21874042:C:G	21547549	21547549	0	3.40722e-10	-0.22487	0.0334251	FALSE	-38177	Distal mGene mQTLs
cg14195027	chr1	21575193	21575192	rs2275368:21900583:A:G	21574090	21574090	0	7.52141e-08	-0.223686	0.0395314	FALSE	-64718	Distal mGene mQTLs
cg07180649	chr1	22143798	22143797	rs12404660:22458794:A:G	22132301	22132301	0	5.7814e-09	0.144577	0.0233969	FALSE	11668	Distal mGene mQTLs
cg13795941	chr1	22584288	22584287	rs209751:22893908:C:G	22567415	22567415	0	1.47389e-12	-0.281955	0.0364963	FALSE	-3851	Distal mGene mQTLs
cg27136384	chr1	22585057	22585056	rs649754	22579754	22579754	0	1.83843e-16	0.20882	0.0225162	FALSE	-16190	Distal mGene mQTLs
cg18137921	chr1	22964426	22964425	rs925826:23291090:A:G	22964597	22964597	0	3.01196e-16	0.261229	0.0284214	FALSE	741	Promoter mGene mQTLs
cg04163048	chr1	22964838	22964837	rs925826:23291090:A:G	22964597	22964597	0	6.79864e-13	0.225557	0.0286862	TRUE	741	Promoter mGene mQTLs
cg05045517	chr1	23425441	23425440	rs7534474:23773851:A:G	23447358	23447358	0	1.43869e-08	-0.221637	0.0369567	FALSE	37210	Distal non-mGene mQTLs
cg22040403	chr1	23531525	23531524	rs2742976:23858002:T:G	23531510	23531510	0	2.24736e-14	0.277114	0.0327644	FALSE	-290	Promoter mGene mQTLs
cg26873754	chr1	23867239	23867238	exm31606	23868283	23868283	0	1.37307e-09	-0.185235	0.0286708	FALSE	11	Promoter mGene mQTLs
cg12626384	chr1	23868476	23868475	rs2070954:24194788:A:G	23868298	23868298	0	8.2107e-10	0.193356	0.0294758	TRUE	-4	Promoter mGene mQTLs
cg07568418	chr1	23868485	23868484	rs2070954:24194788:A:G	23868298	23868298	0	2.21916e-20	0.920466	0.08551	FALSE	-4	Promoter mGene mQTLs
cg05560725	chr1	23868500	23868499	rs2070953:24194862:A:C	23868372	23868372	0	9.37886e-10	0.205068	0.0313834	FALSE	-78	Promoter mGene mQTLs
cg03384426	chr1	23958785	23958784	rs114172431:24286885:A:G	23960395	23960395	0	1.59754e-13	-0.348789	0.0429677	TRUE	-1286	Promoter mGene mQTLs
cg15040770	chr1	24186984	24186983	rs12094257:24513608:C:T	24187118	24187118	0	7.08945e-07	0.166179	0.0320904	FALSE	841	Promoter non-mGene mQTLs
cg26847678	chr1	24186993	24186992	rs12094257:24513608:C:T	24187118	24187118	0	9.00204e-08	0.148879	0.0264866	FALSE	841	Promoter non-mGene mQTLs
cg08587864	chr1	24393220	24393219	exm32381	24391589	24391589	0	2.12079e-16	-0.287317	0.0310605	FALSE	25345	Distal non-mGene mQTLs
cg07174997	chr1	24730554	24730553	rs142838832:25076811:TGGTA:T	24750320	24750324	0	5.63705e-07	-0.144209	0.02758	TRUE	-4963	Distal non-mGene mQTLs
cg24337829	chr1	25797368	25797367	rs7524771:26126375:A:G	25799884	25799884	0	7.23999e-13	-0.22634	0.0288266	FALSE	292	Promoter non-mGene mQTLs
cg22943243	chr1	25905821	25905820	rs213641:26232356:C:A	25905865	25905865	0	1.1583e-08	0.15057	0.0249255	FALSE	1126	Promoter mGene mQTLs
cg17132079	chr1	26045375	26045374	rs3008245:26348474:A:G	26021983	26021983	0	1.1219e-07	-0.129179	0.0231721	FALSE	-2099	Promoter non-mGene mQTLs
cg06542282	chr1	26164050	26164049	rs9783055:26491492:C:T	26165001	26165001	0	9.22813e-13	0.219692	0.0281339	FALSE	3580	Distal non-mGene mQTLs
cg00918900	chr1	26170901	26170900	rs8768:26497340:A:C	26170849	26170849	0	5.33507e-08	-0.0969003	0.0169118	FALSE	-2268	Promoter non-mGene mQTLs
cg11887554	chr1	26170821	26170820	rs8768:26497340:A:C	26170849	26170849	0	4.27779e-08	-0.105554	0.0182767	TRUE	-978	Promoter mGene mQTLs
cg11858029	chr1	26318003	26318002	rs11577318:26601570:A:G	26275079	26275079	0	2.23582e-26	0.311605	0.0239547	FALSE	-40926	Distal non-mGene mQTLs
cg24815951	chr1	26336445	26336444	rs72649360:26662904:C:T	26336413	26336413	0	1.73994e-06	-0.0873687	0.0175494	FALSE	17717	Distal mGene mQTLs
cg12813724	chr1	26364047	26364046	rs7534104:26690864:G:T	26364373	26364373	0	5.57451e-15	0.331512	0.0381184	FALSE	10149	Distal mGene mQTLs
cg24410607	chr1	26436325	26436324	rs71680492:26757610:CTAAA:C	26431119	26431123	0	8.51146e-08	0.186047	0.0330301	TRUE	1163	Promoter mGene mQTLs
cg12203394	chr1	26922128	26922127	rs10493037:27248645:A:G	26922154	26922154	1	2.45361e-10	0.955793	0.140772	FALSE	-21916	Distal mGene mQTLs
cg20654935	chr1	27935095	27935094	rs3737809:28261593:T:C	27935082	27935082	0	7.96329e-31	-0.484227	0.0329727	FALSE	-89	Promoter mGene mQTLs
cg03833272	chr1	27934968	27934967	rs3737807	27935391	27935391	0	3.52609e-32	-0.411938	0.0270966	FALSE	-398	Promoter mGene mQTLs
cg00605270	chr1	27935042	27935041	rs3737807	27935391	27935391	0	1.50893e-39	-0.745319	0.0411857	FALSE	-398	Promoter mGene mQTLs
cg22339091	chr1	27935180	27935179	rs3737807	27935391	27935391	0	1.41643e-32	-0.505411	0.0329161	FALSE	-398	Promoter mGene mQTLs
cg07233700	chr1	27935196	27935195	rs3737807	27935391	27935391	0	1.93703e-40	-0.725808	0.0393223	FALSE	-398	Promoter mGene mQTLs
cg21676740	chr1	27935570	27935569	rs3737807	27935391	27935391	0	6.99165e-41	-0.680107	0.0364897	FALSE	-398	Promoter mGene mQTLs
cg21106899	chr1	28246902	28246901	rs5773213:28533579:GA:G	28207068	28207069	0	9.30197e-23	0.463205	0.039742	TRUE	25957	Distal non-mGene mQTLs
cg13488944	chr1	28248660	28248659	rs112339306:28560136:C:CT	28233625	28233625	0	1.23913e-09	0.108541	0.0167487	TRUE	-600	Promoter non-mGene mQTLs
cg22871559	chr1	28247226	28247225	rs67092542:28573293:G:GA	28246782	28246782	0	8.74366e-20	0.321995	0.0305491	FALSE	362	Promoter non-mGene mQTLs
cg07241917	chr1	28245789	28245788	rs515437:28574043:T:A	28247532	28247532	0	7.98179e-28	0.637154	0.0470184	FALSE	-388	Promoter non-mGene mQTLs
cg14852267	chr1	28237988	28237987	rs546569:28575140:T:G	28248629	28248629	0	1.71623e-14	0.242165	0.028476	FALSE	-12520	Distal mGene mQTLs
cg24916377	chr1	28246542	28246541	rs546569:28575140:T:G	28248629	28248629	0	1.16595e-42	1.59838	0.0825164	FALSE	-1485	Promoter non-mGene mQTLs
cg22498982	chr1	28775338	28775337	rs11316891:29002191:CA:C	28675679	28675680	0	2.3291e-15	-0.293033	0.0331276	TRUE	-6947	Distal non-mGene mQTLs
cg02330710	chr1	28746207	28746206	rs3738067:29063236:G:A	28736724	28736724	0	1.47632e-11	0.179759	0.0245889	FALSE	-103	Promoter mGene mQTLs
cg00648630	chr1	28775518	28775517	rs71027298:29074035:TA:T	28747523	28747524	0	1.23929e-21	-0.409389	0.0364402	FALSE	-10902	Distal non-mGene mQTLs
cg25287272	chr1	28886722	28886721	rs457618:29213316:A:C	28886804	28886804	0	6.10193e-11	0.202388	0.0287082	FALSE	287	Promoter mGene mQTLs
cg03131236	chr1	29217701	29217700	rs139233377:29535724:ACTTACC:A	29209212	29209218	0	8.05644e-07	-0.262421	0.0509527	TRUE	21730	Distal mGene mQTLs
cg24013909	chr1	29249194	29249193	rs139121461:29575675:C:CACAT	29249163	29249163	0	8.51617e-18	0.36528	0.0373254	TRUE	-12647	Distal mGene mQTLs
cg01115565	chr1	29257711	29257710	rs145141770:29583733:G:GAAGT	29257221	29257221	0	7.32698e-18	-0.255512	0.0260427	FALSE	-20705	Distal mGene mQTLs
cg03607891	chr1	32205493	32205492	rs7521501:32705193:G:C	32239592	32239592	0	6.1383e-07	0.158398	0.0304021	FALSE	2028	Promoter non-mGene mQTLs
cg24153003	chr1	32695300	32695299	rs3844243:33082610:C:T	32617009	32617009	0	1.33872e-11	0.345088	0.0470892	FALSE	33894	Distal non-mGene mQTLs
cg02493846	chr1	32798901	32798900	rs6702519:33231403:G:T	32765802	32765802	0	4.72761e-10	-0.166752	0.0250176	FALSE	-23917	Distal non-mGene mQTLs
cg05906443	chr1	32650598	32650597	exm41165	32770188	32770188	0	2.16562e-07	0.360937	0.0664044	TRUE	-28303	Distal non-mGene mQTLs
cg16873748	chr1	32959574	32959573	rs67835920:33366074:GGCCTCCCAGAGTGCT:G	32900473	32900488	0	9.6781e-09	0.204484	0.03365	TRUE	965	Promoter non-mGene mQTLs
cg00843917	chr1	32949647	32949646	rs194644	32943950	32943950	0	3.19116e-11	0.212253	0.0296052	FALSE	20735	Distal mGene mQTLs
cg08912276	chr1	33430290	33430289	rs79505176:33626833:G:A	33161232	33161232	0	1.03443e-09	-0.312294	0.0479315	FALSE	20827	Distal non-mGene mQTLs
cg22719314	chr1	33318137	33318136	exm2251422	33330480	33330480	0	1.14372e-10	0.139311	0.0200941	FALSE	-23132	Distal non-mGene mQTLs
cg23254163	chr1	33709570	33709569	rs6668431:33796879:G:A	33331278	33331278	0	4.52526e-07	-0.355156	0.0673068	TRUE	-23930	Distal non-mGene mQTLs
cg17833169	chr1	33442401	33442400	rs10914687:33813755:C:T	33348154	33348154	0	4.996e-13	-0.285453	0.0360543	FALSE	2198	Promoter non-mGene mQTLs
cg03662049	chr1	35717555	35717554	rs11264194:36195372:C:T	35729771	35729771	0	1.61592e-07	0.285886	0.0520007	FALSE	40196	Distal non-mGene mQTLs
cg13370357	chr1	35717685	35717684	rs11264194:36195372:C:T	35729771	35729771	0	3.47219e-08	0.389373	0.0669234	FALSE	40196	Distal non-mGene mQTLs
cg23238147	chr1	36323896	36323895	rs12116935	36323945	36323945	0	8.6969e-09	0.0929663	0.015245	FALSE	-211	Promoter non-mGene mQTLs
cg01773061	chr1	36397407	36397406	rs55690968:36862566:G:GA	36396965	36396965	0	1.68866e-15	0.141529	0.0159018	TRUE	927	Promoter mGene mQTLs
cg15387272	chr1	36397909	36397908	rs6425986:36863523:A:G	36397922	36397922	0	2.37579e-07	0.45462	0.0839457	FALSE	-30	Promoter mGene mQTLs
cg16341373	chr1	37692291	37692290	rs568817:38157947:C:T	37692275	37692275	0	9.19238e-21	0.442629	0.0405775	FALSE	143	Promoter mGene mQTLs
cg12139725	chr1	37754110	37754109	rs140199039:38219383:T:C	37753711	37753711	0	1.09715e-12	-0.256358	0.0329591	FALSE	11422	Distal mGene mQTLs
cg17489086	chr1	37947147	37947146	rs71675317:38391360:TCTAA:T	37925688	37925692	0	1.326e-13	0.57494	0.0705445	TRUE	21369	Distal mGene mQTLs
cg19049837	chr1	38046992	38046991	rs201555743:38518963:T:TG	38053291	38053291	0	5.35242e-13	0.697235	0.0882	TRUE	-5977	Distal non-mGene mQTLs
cg05374241	chr1	39332429	39332428	rs5773652:39681115:G:GT	39215443	39215443	0	2.31038e-09	0.171569	0.0269777	TRUE	-134127	Distal mGene mQTLs
cg01656955	chr1	39672295	39672294	rs1568146:40136928:C:T	39671256	39671256	0	6.53315e-10	-0.153133	0.0231893	FALSE	782	Promoter mGene mQTLs
cg06937997	chr1	39671514	39671513	rs536003:40154898:G:A	39689226	39689226	0	2.50075e-07	0.196162	0.036295	FALSE	2463	Promoter non-mGene mQTLs
cg15901364	chr1	39689322	39689321	rs59796683:40156767:T:C	39691095	39691095	0	5.26591e-07	-0.136116	0.0259582	TRUE	594	Promoter mGene mQTLs
cg17748822	chr1	39768370	39768369	rs230329:40253786:C:T	39788114	39788114	0	8.89988e-14	-0.217539	0.0264663	FALSE	747	Promoter mGene mQTLs
cg23639565	chr1	40042186	40042185	rs11806616:40507145:C:A	40041473	40041473	0	3.42296e-08	0.287969	0.0494698	FALSE	-1240	Promoter mGene mQTLs
cg00695362	chr1	40040541	40040540	rs3131684:40512591:C:T	40046919	40046919	0	7.25953e-18	0.217745	0.0221898	FALSE	-6686	Distal mGene mQTLs
cg11145399	chr1	40133101	40133100	rs4492609	40133103	40133103	0	5.23728e-14	0.369157	0.0444148	FALSE	-339	Promoter non-mGene mQTLs
cg12942052	chr1	40133340	40133339	rs112323754:40626344:CAGG:C	40160672	40160675	0	1.5954e-15	0.282969	0.0317592	TRUE	701	Promoter non-mGene mQTLs
cg20145692	chr1	40315618	40315617	rs111700365:40781175:CG:C	40315503	40315504	0	2.86925e-09	0.380729	0.0602674	TRUE	2313	Promoter mGene mQTLs
cg08920610	chr1	40508335	40508334	rs148588691:40942698:C:CTGAA	40477026	40477026	0	3.77591e-08	0.181353	0.0312625	TRUE	189	Promoter non-mGene mQTLs
cg24884207	chr1	40783535	40783534	rs2769257:41249242:G:T	40783570	40783570	0	7.35647e-08	0.118789	0.0209761	FALSE	442	Promoter mGene mQTLs
cg03387723	chr1	41242793	41242792	rs71692898:41706232:T:TA	41240560	41240560	0	1.80004e-08	-0.199085	0.0334485	FALSE	1594	Promoter mGene mQTLs
cg03307360	chr1	41241973	41241972	rs35883594:41744093:A:G	41278421	41278421	0	4.0833e-12	0.205908	0.027297	TRUE	-36048	Distal non-mGene mQTLs
cg08708961	chr1	41282587	41282586	rs35883594:41744093:A:G	41278421	41278421	0	5.55925e-08	0.138976	0.0242912	FALSE	-36048	Distal non-mGene mQTLs
cg21578869	chr1	41362459	41362458	rs71715635:41828124:A:AC	41362452	41362452	0	7.98961e-12	1.70474	0.229684	TRUE	-530	Promoter non-mGene mQTLs
cg03296524	chr1	41366978	41366977	rs4359027:41848296:G:A	41382624	41382624	0	2.06298e-07	0.0860906	0.0158086	FALSE	-20702	Distal non-mGene mQTLs
cg27238470	chr1	41484655	41484654	rs6674101:41950473:G:A	41484802	41484802	0	1.79762e-13	0.179362	0.0221521	FALSE	-129	Promoter mGene mQTLs
cg15807154	chr1	41484722	41484721	rs6674101:41950473:G:A	41484802	41484802	0	3.08227e-12	0.155078	0.0204218	FALSE	-129	Promoter mGene mQTLs
cg05570491	chr1	41918767	41918766	rs11588703:42383814:C:G	41918143	41918143	0	9.31612e-10	-0.334897	0.0512422	FALSE	117782	Distal mGene mQTLs
cg01990334	chr1	42335664	42335663	rs10540099:42801476:GTCTT:G	42335805	42335809	0	4.07157e-16	0.165405	0.0180957	TRUE	72	Promoter mGene mQTLs
cg04580768	chr1	42646867	42646866	rs35170842:43106351:G:GGTCA	42640680	42640680	0	1.36931e-06	0.116511	0.0231526	TRUE	-177350	Distal mGene mQTLs
cg05139571	chr1	42765579	42765578	rs3738504:43232807:C:G	42767136	42767136	0	1.10681e-11	-0.261278	0.0354853	FALSE	-52	Promoter non-mGene mQTLs
cg00006626	chr1	42765961	42765960	rs3738504:43232807:C:G	42767136	42767136	0	2.85983e-22	-0.257445	0.0224394	FALSE	-52	Promoter non-mGene mQTLs
cg19552482	chr1	42846816	42846815	rs12136064:43312506:G:C	42846835	42846835	0	6.80631e-21	0.291461	0.0265998	FALSE	-262	Promoter mGene mQTLs
cg26681016	chr1	42959254	42959253	rs76657494:43412051:G:A	42946380	42946380	0	3.18573e-09	0.748699	0.118901	TRUE	12793	Distal mGene mQTLs
cg21615440	chr1	42959267	42959266	1:43414738:CAA:C	42949067	42949069	0	8.78239e-12	-0.409001	0.0552333	TRUE	10106	Distal mGene mQTLs
cg06792911	chr1	42959352	42959351	rs17387775	42950462	42950462	0	9.19843e-31	-0.593106	0.0404523	FALSE	8711	Distal mGene mQTLs
cg12656391	chr1	42959486	42959485	rs17387775	42950462	42950462	0	2.77575e-40	-0.963446	0.0523772	FALSE	8711	Distal mGene mQTLs
cg09003612	chr1	42959552	42959551	rs17387775	42950462	42950462	0	1.86282e-51	-1.16051	0.0500494	FALSE	8711	Distal mGene mQTLs
cg03128534	chr1	42958306	42958305	rs3738515:43426621:G:C	42960950	42960950	0	2.12663e-21	0.165558	0.0148527	FALSE	-1777	Promoter mGene mQTLs
cg07803811	chr1	42958311	42958310	rs3738515:43426621:G:C	42960950	42960950	0	2.52169e-16	0.179919	0.0195115	FALSE	-1777	Promoter mGene mQTLs
cg13666471	chr1	43783816	43783815	rs917294:44249485:A:G	43783814	43783814	0	1.53366e-19	0.535628	0.0512651	FALSE	-77990	Distal mGene mQTLs
cg15363333	chr1	43933215	43933214	rs34224911:44258341:A:T	43792670	43792670	0	6.38176e-07	0.148841	0.0286147	FALSE	-86846	Distal non-mGene mQTLs
cg20699340	chr1	43933398	43933397	rs12120287:44275686:A:G	43810015	43810015	0	2.42171e-07	-0.209058	0.0386319	TRUE	-104191	Distal non-mGene mQTLs
cg06322035	chr1	43800980	43800979	rs37460:44288364:C:G	43822692	43822692	0	7.21549e-08	0.158966	0.0280508	TRUE	-116868	Distal mGene mQTLs
cg11825002	chr1	43934198	43934197	rs3791112:44379248:T:G	43913576	43913576	0	2.04684e-07	0.11738	0.0215476	FALSE	-207752	Distal non-mGene mQTLs
cg13964099	chr1	43924705	43924704	rs4660262:44382524:G:A	43916852	43916852	0	3.06479e-23	0.348518	0.0294469	FALSE	-211028	Distal mGene mQTLs
cg23954153	chr1	43936682	43936681	rs12127737:44402565:G:A	43936893	43936893	0	1.3937e-08	-0.185461	0.0308916	FALSE	-3573	Distal mGene mQTLs
cg12908607	chr1	43936851	43936850	rs12127737:44402565:G:A	43936893	43936893	0	3.73745e-16	-0.570563	0.0623227	FALSE	-3573	Distal mGene mQTLs
cg06451878	chr1	43285827	43285826	rs7523468:44493795:A:G	44028123	44028123	0	1.15003e-06	0.107829	0.0212624	TRUE	2320	Promoter non-mGene mQTLs
cg07806732	chr1	44356126	44356125	rs12026967:44776240:C:A	44310568	44310568	0	1.32627e-26	0.655733	0.0500823	FALSE	44692	Distal mGene mQTLs
cg27524602	chr1	44356141	44356140	rs12026967:44776240:C:A	44310568	44310568	0	8.97967e-33	1.14407	0.0741429	FALSE	44692	Distal mGene mQTLs
cg08533162	chr1	44239746	44239745	rs11210982:44793760:G:A	44328088	44328088	0	3.25118e-13	-0.508657	0.0636381	FALSE	27172	Distal mGene mQTLs
cg26291133	chr1	44821299	44821298	rs11211035:45265240:G:A	44799568	44799568	0	1.70914e-08	-0.143184	0.0240143	TRUE	657	Promoter non-mGene mQTLs
cg02581053	chr1	44949452	44949451	rs392410:45356638:C:T	44890966	44890966	0	5.0644e-21	-0.648299	0.0589074	FALSE	95756	Distal mGene mQTLs
cg26391634	chr1	44815514	44815513	rs201524888:45401613:GT:G	44935941	44935942	0	3.8205e-12	0.211136	0.0279459	TRUE	50781	Distal non-mGene mQTLs
cg06956784	chr1	45365240	45365239	rs34768551:46020408:G:A	45554736	45554736	0	1.72946e-06	-0.196201	0.0393993	FALSE	-4193	Distal non-mGene mQTLs
cg09791107	chr1	45557598	45557597	rs3790585:46023356:A:T	45557684	45557684	0	2.94384e-10	-0.203352	0.0301028	FALSE	-7141	Distal mGene mQTLs
cg18795169	chr1	45803308	45803307	rs35565437:46578969:AT:A	46113297	46113298	0	1.68719e-07	-0.0973552	0.0177378	TRUE	19739	Distal non-mGene mQTLs
cg10143960	chr1	45723209	45723208	rs1707302:46600917:A:G	46135245	46135245	0	2.50185e-07	0.191523	0.0354371	FALSE	-2209	Promoter non-mGene mQTLs
cg26011752	chr1	46084938	46084937	rs1707302:46600917:A:G	46135245	46135245	0	3.94802e-21	0.294758	0.0266846	FALSE	-2209	Promoter mGene mQTLs
cg04181682	chr1	46108359	46108358	rs1707302:46600917:A:G	46135245	46135245	0	5.66131e-35	0.69138	0.0424617	FALSE	-2209	Promoter mGene mQTLs
cg12978857	chr1	46045723	46045722	rs1416706:46602844:G:A	46137172	46137172	0	4.82014e-13	0.245798	0.0310209	FALSE	-4136	Distal mGene mQTLs
cg27584146	chr1	46134244	46134243	rs1416706:46602844:G:A	46137172	46137172	0	4.58499e-23	0.54857	0.046607	FALSE	-4136	Distal mGene mQTLs
cg11704005	chr1	46135694	46135693	rs9429095:46603348:T:G	46137676	46137676	0	1.08087e-12	0.280546	0.0360565	FALSE	-4640	Distal non-mGene mQTLs
cg04812681	chr1	46167482	46167481	rs9429095:46603348:T:G	46137676	46137676	0	2.23976e-15	0.260909	0.0294738	FALSE	-4640	Distal non-mGene mQTLs
cg20650505	chr1	46063033	46063032	rs9429095:46603348:T:G	46137676	46137676	0	1.03551e-10	0.160084	0.0230287	FALSE	-4640	Distal mGene mQTLs
cg20328570	chr1	46175081	46175080	rs35018988:46640602:C:CA	46174930	46174930	0	1.57606e-06	0.0752932	0.0150564	TRUE	1558	Promoter non-mGene mQTLs
cg06212760	chr1	46199266	46199265	rs7521617:46664754:C:T	46199082	46199082	0	2.37792e-13	0.210586	0.0261667	FALSE	21223	Distal mGene mQTLs
cg11134437	chr1	46407042	46407041	rs324418:46872698:A:G	46407026	46407026	0	1.10306e-07	-0.202554	0.0363109	FALSE	-12761	Distal mGene mQTLs
cg00403919	chr1	46407047	46407046	rs324418:46872698:A:G	46407026	46407026	0	4.79698e-10	-0.225246	0.0338075	FALSE	-12761	Distal mGene mQTLs
cg10732601	chr1	46617160	46617159	rs7552833:47083025:A:C	46617353	46617353	0	2.0956e-17	-0.185141	0.0192117	FALSE	-510	Promoter non-mGene mQTLs
cg00305071	chr1	46617198	46617197	rs7552833:47083025:A:C	46617353	46617353	0	2.48446e-10	-0.174544	0.0257163	FALSE	-510	Promoter non-mGene mQTLs
cg07325614	chr1	46670542	46670541	rs2218190:47130594:C:T	46664922	46664922	0	3.00063e-07	0.11134	0.0207509	TRUE	3933	Distal mGene mQTLs
cg24348107	chr1	51616904	51616903	rs72896012:52082594:G:C	51616922	51616922	0	9.1819e-14	0.457655	0.055716	FALSE	-39743	Distal mGene mQTLs
cg19751897	chr1	52055156	52055155	rs142834436:52520858:CACA:C	52055186	52055189	0	4.3523e-11	0.362967	0.0510337	TRUE	985	Promoter mGene mQTLs
cg26251270	chr1	52602161	52602160	rs11810754:53067914:T:G	52602242	52602242	0	1.19392e-08	0.263633	0.0436861	FALSE	130	Promoter mGene mQTLs
cg22129364	chr1	52602223	52602222	rs11810754:53067914:T:G	52602242	52602242	0	1.2341e-08	-0.195188	0.0323799	FALSE	130	Promoter mGene mQTLs
cg04527603	chr1	52726417	52726416	rs76280926:53192082:T:G	52726410	52726410	0	1.6749e-19	0.229889	0.0220332	TRUE	57	Promoter mGene mQTLs
cg24675658	chr1	52726425	52726424	rs76280926:53192082:T:G	52726410	52726410	0	2.13316e-19	0.217302	0.0209063	FALSE	57	Promoter mGene mQTLs
cg18184411	chr1	52843590	52843589	rs533935:53308807:T:C	52843135	52843135	0	9.12617e-07	-0.142936	0.0279024	FALSE	-624	Promoter mGene mQTLs
cg09167911	chr1	52842194	52842193	rs534070:53308858:T:G	52843186	52843186	0	2.06891e-07	-0.193893	0.0356081	FALSE	-675	Promoter mGene mQTLs
cg27535305	chr1	52926979	52926978	rs1242331:53392908:A:G	52927236	52927236	0	6.77001e-30	-0.575548	0.0401561	FALSE	-7	Promoter mGene mQTLs
cg08859206	chr1	52927103	52927102	rs1242331:53392908:A:G	52927236	52927236	0	7.56753e-22	-0.654277	0.057825	FALSE	-7	Promoter mGene mQTLs
cg25767906	chr1	52927110	52927109	rs1242331:53392908:A:G	52927236	52927236	0	3.29064e-27	-0.677413	0.0508564	FALSE	-7	Promoter mGene mQTLs
cg20055417	chr1	52927173	52927172	rs1242331:53392908:A:G	52927236	52927236	0	4.53817e-29	-0.980277	0.0699186	FALSE	-7	Promoter mGene mQTLs
cg03609269	chr1	52927352	52927351	rs1242331:53392908:A:G	52927236	52927236	0	2.30881e-26	-0.619781	0.0476647	FALSE	-7	Promoter mGene mQTLs
cg04310824	chr1	52927626	52927625	rs1242331:53392908:A:G	52927236	52927236	0	1.86125e-11	-0.225744	0.0310588	TRUE	-7	Promoter mGene mQTLs
cg03579872	chr1	52927802	52927801	rs1242331:53392908:A:G	52927236	52927236	0	4.10193e-24	-0.426677	0.0350835	FALSE	-7	Promoter mGene mQTLs
cg01802117	chr1	52927889	52927888	rs1242331:53392908:A:G	52927236	52927236	0	5.61153e-28	-1.20508	0.0885522	FALSE	-7	Promoter mGene mQTLs
cg02813845	chr1	52928081	52928080	rs1242331:53392908:A:G	52927236	52927236	0	2.85066e-28	-0.839526	0.0611927	FALSE	1438	Promoter mGene mQTLs
cg13538881	chr1	54053502	54053501	rs201851293:53601810:ACT:A	53136138	53136140	0	3.03806e-07	-0.195165	0.036392	TRUE	6494	Distal non-mGene mQTLs
cg14898108	chr1	53143018	53143017	rs2404211:53607666:T:C	53141994	53141994	0	1.58479e-15	0.188818	0.0211895	FALSE	638	Promoter mGene mQTLs
cg20780708	chr1	53197143	53197142	rs72673121:53662823:C:A	53197151	53197151	0	2.75043e-13	0.179833	0.0224165	FALSE	-722	Promoter mGene mQTLs
cg03341469	chr1	53890234	53890233	rs10888814:54355041:A:G	53889368	53889368	0	1.97487e-18	0.379685	0.0378624	FALSE	466	Promoter mGene mQTLs
cg05461140	chr1	54298961	54298960	rs2183162:54762721:T:G	54297048	54297048	0	6.26043e-11	-0.363349	0.0515751	FALSE	116431	Distal mGene mQTLs
cg01517571	chr1	54624287	54624286	rs2060387:55089316:A:C	54623643	54623643	0	4.81867e-19	-0.457534	0.0445927	FALSE	-81386	Distal mGene mQTLs
cg14752245	chr1	55040205	55040204	rs2479410:55505861:G:A	55040188	55040188	1	1.30143e-07	0.62412	0.112586	TRUE	-640	Promoter mGene mQTLs
cg17826594	chr1	55040342	55040341	rs28385704:55506103:C:G	55040430	55040430	1	3.17803e-11	1.05499	0.147135	FALSE	-882	Promoter mGene mQTLs
cg20146536	chr1	56502873	56502872	rs7528118:56968755:G:A	56503083	56503083	0	8.38501e-18	0.314109	0.0320881	FALSE	142218	Distal non-mGene mQTLs
cg19717595	chr1	57421984	57421983	rs4912164:57887992:C:T	57422320	57422320	0	1.58071e-13	-0.286754	0.0353174	FALSE	1124414	Distal mGene mQTLs
cg05919360	chr1	57423746	57423745	rs144659354:57889896:C:T	57424224	57424224	0	1.35407e-08	0.150622	0.0250643	TRUE	1122510	Distal mGene mQTLs
cg02533419	chr1	58783653	58783652	rs1980700	58779120	58779120	0	1.32518e-12	0.240435	0.0310459	FALSE	5207	Distal mGene mQTLs
cg16465502	chr1	59927262	59927261	rs2294946:60314703:T:C	59849031	59849031	0	2.17624e-08	0.204361	0.0345583	FALSE	-34245	Distal non-mGene mQTLs
cg10380643	chr1	60864970	60864969	rs6657429	60867301	60867301	0	1.01945e-07	-0.103443	0.018489	FALSE	-2042	Promoter non-mGene mQTLs
cg21681549	chr1	61077018	61077017	rs71050110:61542770:G:GAGGGGAGA	61077098	61077098	0	5.08002e-12	0.221256	0.0294855	TRUE	-211839	Distal mGene mQTLs
cg08540100	chr1	61741788	61741787	rs7551399:62207254:A:G	61741582	61741582	0	4.29678e-07	0.30749	0.0581495	FALSE	842	Promoter non-mGene mQTLs
cg23249608	chr1	64664168	64664167	rs6687194:64939753:T:C	64474070	64474070	0	3.21548e-07	-0.114632	0.0214239	TRUE	-3278	Distal mGene mQTLs
cg09774749	chr1	65002309	65002308	rs199679136:65467365:G:T	65001682	65001682	0	6.85304e-07	-0.323179	0.0623184	TRUE	807	Promoter mGene mQTLs
cg18762036	chr1	65069060	65069059	rs486378:65530283:A:G	65064600	65064600	0	2.25939e-11	0.327777	0.045318	FALSE	-6092	Distal non-mGene mQTLs
cg27037565	chr1	65264611	65264610	rs34750466:65741582:C:CT	65275899	65275899	0	6.0643e-08	-0.163556	0.0286778	TRUE	-27680	Distal mGene mQTLs
cg14976592	chr1	65420478	65420477	rs12145690	65421330	65421330	0	2.21253e-31	0.333867	0.0224108	FALSE	-743	Promoter mGene mQTLs
cg16413020	chr1	65420734	65420733	rs12145690	65421330	65421330	0	1.01886e-17	0.189964	0.0194702	FALSE	-743	Promoter mGene mQTLs
cg22733910	chr1	65791871	65791870	rs77979890:66257654:G:T	65791971	65791971	0	4.14472e-08	0.143283	0.0247816	TRUE	543	Promoter mGene mQTLs
cg13052034	chr1	66533556	66533555	1:66999215:G:GATAAT	66533532	66533532	0	2.04052e-28	0.778323	0.0565064	FALSE	-149	Promoter mGene mQTLs
cg14626797	chr1	67054576	67054575	rs3806321:67520083:C:T	67054400	67054400	0	1.07599e-09	-0.216878	0.0333257	FALSE	-301	Promoter mGene mQTLs
cg01355374	chr1	67134865	67134864	rs12044149:67600686:G:T	67135003	67135003	0	2.35978e-16	0.745994	0.0808026	FALSE	96850	Distal non-mGene mQTLs
cg23978657	chr1	67135025	67135024	rs12044149:67600686:G:T	67135003	67135003	0	6.14894e-25	0.353508	0.0283494	FALSE	96850	Distal non-mGene mQTLs
cg22654157	chr1	67135016	67135015	rs12044149:67600686:G:T	67135003	67135003	0	1.28462e-28	0.41757	0.0301499	FALSE	96850	Distal mGene mQTLs
cg09433222	chr1	67135140	67135139	rs12044149:67600686:G:T	67135003	67135003	0	5.18068e-27	0.502154	0.0379094	FALSE	96850	Distal mGene mQTLs
cg11309454	chr1	67134583	67134582	exm-rs11209003	67135449	67135449	0	2.57581e-20	0.298659	0.0278079	FALSE	96404	Distal non-mGene mQTLs
cg02482460	chr1	67135153	67135152	exm-rs11209003	67135449	67135449	0	2.12936e-20	0.43622	0.0404988	FALSE	96404	Distal non-mGene mQTLs
cg16987567	chr1	67134490	67134489	rs10789224	67139451	67139451	0	3.71794e-18	0.3412	0.0343829	FALSE	-544	Promoter non-mGene mQTLs
cg04311496	chr1	67308037	67308036	rs3977732:67773778:TTA:T	67308095	67308097	0	4.10096e-08	-0.14468	0.0250138	TRUE	-731	Promoter mGene mQTLs
cg10178795	chr1	67832750	67832749	rs11422955:68287749:G:GA	67822066	67822066	0	5.48409e-13	0.228843	0.0289643	TRUE	11401	Distal mGene mQTLs
cg26764244	chr1	67833829	67833828	rs2249993:68296104:G:C	67830421	67830421	0	2.88173e-15	-0.234974	0.0266732	FALSE	3046	Distal mGene mQTLs
cg09094121	chr1	68231874	68231873	rs2566774:68694877:T:C	68229194	68229194	0	8.4509e-27	0.326253	0.0247791	FALSE	3926	Distal mGene mQTLs
cg03145924	chr1	68231134	68231133	rs72670465:68695462:C:A	68229779	68229779	0	2.01909e-08	0.268918	0.0453586	FALSE	3341	Distal non-mGene mQTLs
cg24940889	chr1	71464294	71464293	rs977145	71463606	71463606	0	1.18411e-08	0.181428	0.0300558	FALSE	819128	Distal mGene mQTLs
cg17719053	chr1	74732528	74732527	rs28695657:75197614:G:T	74731930	74731930	0	1.81253e-28	0.42524	0.0308291	FALSE	1222	Promoter mGene mQTLs
cg10128416	chr1	74732720	74732719	rs28695657:75197614:G:T	74731930	74731930	0	3.77416e-16	0.336585	0.0367719	FALSE	1222	Promoter mGene mQTLs
cg00121533	chr1	74733434	74733433	rs28695657:75197614:G:T	74731930	74731930	0	5.29468e-15	0.445377	0.0511592	FALSE	1478	Promoter mGene mQTLs
cg21906852	chr1	74732899	74732898	rs28602706:75199973:T:C	74734289	74734289	0	3.45062e-18	0.436608	0.0439426	FALSE	-1137	Promoter mGene mQTLs
cg09502221	chr1	74732916	74732915	rs28602706:75199973:T:C	74734289	74734289	0	6.79719e-10	0.211169	0.0320144	FALSE	-1137	Promoter mGene mQTLs
cg26690034	chr1	74733280	74733279	rs28602706:75199973:T:C	74734289	74734289	0	3.54424e-08	0.278792	0.0479521	FALSE	-881	Promoter mGene mQTLs
cg26752657	chr1	74733392	74733391	rs28602706:75199973:T:C	74734289	74734289	0	1.86948e-13	0.355356	0.0439253	FALSE	-881	Promoter mGene mQTLs
cg21535942	chr1	74733417	74733416	rs28602706:75199973:T:C	74734289	74734289	0	2.67702e-15	0.310679	0.0352167	FALSE	-881	Promoter mGene mQTLs
cg09142399	chr1	74734411	74734410	rs28602706:75199973:T:C	74734289	74734289	0	1.1829e-09	0.139483	0.0214934	FALSE	-881	Promoter mGene mQTLs
cg20855608	chr1	74734547	74734546	rs28602706:75199973:T:C	74734289	74734289	0	6.06019e-12	0.14486	0.0193868	TRUE	-881	Promoter mGene mQTLs
cg24580071	chr1	76154587	76154586	rs12122853:76620253:G:A	76154568	76154568	0	2.57308e-10	-0.330507	0.0487424	FALSE	-79849	Distal mGene mQTLs
cg04073724	chr1	76154650	76154649	rs12122853:76620253:G:A	76154568	76154568	0	5.97749e-08	-0.260834	0.0457107	FALSE	-79849	Distal mGene mQTLs
cg20227495	chr1	77889584	77889583	rs202137648:78355115:A:AAGTTTACGT	77889430	77889430	0	1.55691e-09	-0.370887	0.0576232	TRUE	109	Promoter mGene mQTLs
cg09148021	chr1	78004734	78004733	rs41311176:78470506:C:T	78004822	78004822	0	1.40051e-10	0.850385	0.123333	TRUE	-25647	Distal mGene mQTLs
cg24795785	chr1	78004862	78004861	rs41311176:78470506:C:T	78004822	78004822	0	8.94478e-14	0.582563	0.0708833	TRUE	-25647	Distal mGene mQTLs
cg14725810	chr1	84427402	84427401	rs1246386	84401465	84401465	0	1.25915e-08	-0.135895	0.0225588	FALSE	-2933	Distal non-mGene mQTLs
cg02862864	chr1	85276362	85276361	rs4949928:85741684:T:C	85276001	85276001	0	1.34702e-22	0.240009	0.0206991	FALSE	1089	Promoter mGene mQTLs
cg01440648	chr1	85259972	85259971	rs34642410:85776712:A:G	85311029	85311029	0	2.54981e-10	0.404837	0.0596893	FALSE	-34314	Distal non-mGene mQTLs
cg02972105	chr1	85405395	85405394	rs4949905:85928564:T:C	85462881	85462881	0	5.91624e-13	-0.444043	0.0562972	FALSE	115482	Distal mGene mQTLs
cg11648968	chr1	85465434	85465433	rs12044882:85931014:G:T	85465331	85465331	0	2.68871e-19	0.248146	0.0239613	FALSE	113032	Distal mGene mQTLs
cg07350718	chr1	85580159	85580158	rs3753793	85580205	85580205	0	2.61278e-12	0.165929	0.0217659	FALSE	556	Promoter mGene mQTLs
cg24692177	chr1	85580254	85580253	rs3753793	85580205	85580205	0	3.36838e-08	0.115193	0.0197776	FALSE	556	Promoter mGene mQTLs
cg21695830	chr1	88991780	88991779	rs10922534:89457697:T:C	88992014	88992014	0	4.07356e-09	-0.363181	0.0581229	FALSE	946	Promoter mGene mQTLs
cg10890233	chr1	91404826	91404825	rs12408911:91731145:G:A	91265588	91265588	0	8.12097e-14	0.223252	0.0271087	FALSE	139281	Distal mGene mQTLs
cg27594756	chr1	91404833	91404832	rs17131429:91870410:G:C	91404853	91404853	0	9.70178e-20	0.248971	0.0236592	FALSE	16	Promoter mGene mQTLs
cg09737265	chr1	91405157	91405156	rs17131429:91870410:G:C	91404853	91404853	0	7.54176e-12	-0.173171	0.0232991	FALSE	16	Promoter mGene mQTLs
cg07090678	chr1	91500583	91500582	rs13447454:91966406:G:A	91500849	91500849	0	3.86876e-08	0.244624	0.0422057	FALSE	44	Promoter mGene mQTLs
cg25855436	chr1	93845838	93845837	rs12097812:94309777:T:C	93844221	93844221	0	8.48086e-10	0.181519	0.0276974	FALSE	2929	Distal non-mGene mQTLs
cg25855436	chr1	93847788	93847787	rs12097812:94309777:T:C	93844221	93844221	0	3.84712e-38	0.62811	0.0358268	FALSE	2929	Distal non-mGene mQTLs
cg22475139	chr1	94092570	94092569	rs4147882:94558255:TA:T	94092699	94092700	0	1.83567e-10	0.189322	0.0276613	TRUE	28433	Distal mGene mQTLs
cg08916447	chr1	94117451	94117450	rs3838282:94583038:A:G	94117482	94117482	0	1.02405e-09	0.161903	0.0248418	TRUE	3650	Distal mGene mQTLs
cg01676680	chr1	94544122	94544121	rs1361600	94542362	94542362	0	2.25272e-12	0.134357	0.0175632	FALSE	-562	Promoter non-mGene mQTLs
cg24061914	chr1	94542924	94542923	rs1361600	94542362	94542362	0	1.3195e-09	-0.134951	0.0208629	TRUE	-562	Promoter mGene mQTLs
cg06578870	chr1	94856126	94856125	rs71652586:95321573:G:C	94856017	94856017	0	1.12455e-08	-0.222463	0.0367907	FALSE	-35675	Distal mGene mQTLs
cg10607462	chr1	94926000	94925999	rs76032537:95391570:A:G	94926014	94926014	0	4.50528e-10	0.186304	0.0279127	TRUE	1264	Promoter mGene mQTLs
cg26015888	chr1	94119897	94119896	rs61773101:95582202:T:C	95116646	95116646	0	3.39541e-07	0.24166	0.0452641	TRUE	692	Promoter non-mGene mQTLs
cg04637881	chr1	100250216	100250215	rs60926925:100716456:T:TTTTG	100250900	100250900	0	2.50132e-23	1.02398	0.0862774	TRUE	-1066	Promoter mGene mQTLs
cg24323958	chr1	108199263	108199262	rs72693452:108740482:G:A	108197860	108197860	0	2.62617e-12	-0.311404	0.0408536	FALSE	2989	Distal mGene mQTLs
cg05918124	chr1	108193092	108193091	rs61799377:108741774:T:A	108199152	108199152	0	6.12444e-18	-0.457439	0.0464831	TRUE	1697	Promoter mGene mQTLs
cg04773602	chr1	108199611	108199610	rs663481:108743178:C:G	108200556	108200556	0	2.40582e-08	0.151805	0.0257596	TRUE	293	Promoter mGene mQTLs
cg15496551	chr1	108201051	108201050	rs11584987:108743514:C:G	108200892	108200892	0	7.41849e-07	0.161739	0.0312933	TRUE	-43	Promoter mGene mQTLs
cg23280418	chr1	109089461	109089460	rs1886422:109632020:G:A	109089398	109089398	0	9.03599e-22	0.910945	0.080715	FALSE	405	Promoter mGene mQTLs
cg23706211	chr1	109250233	109250232	rs59201433:109792735:A:ACGC	109250113	109250113	0	3.02021e-11	-0.11994	0.0167057	TRUE	-94	Promoter mGene mQTLs
cg03095365	chr1	109273659	109273658	exm-rs599839	109279544	109279544	0	2.40237e-07	-0.138045	0.0255013	FALSE	3642	Distal non-mGene mQTLs
cg09502502	chr1	109283682	109283681	rs657420:109826136:C:T	109283514	109283514	0	1.51612e-19	0.354267	0.0339009	FALSE	-328	Promoter mGene mQTLs
cg12544226	chr1	109393089	109393088	rs681242:109841659:T:C	109299037	109299037	0	2.73251e-07	-0.183811	0.0341297	FALSE	8004	Distal non-mGene mQTLs
cg27547291	chr1	109535190	109535189	rs12135954:110077741:A:G	109535119	109535119	0	1.32794e-13	-0.227608	0.0279281	FALSE	4753	Distal non-mGene mQTLs
cg25748441	chr1	109668063	109668062	rs511566:110111239:T:G	109568617	109568617	0	3.1841e-07	0.102398	0.01913	TRUE	-20006	Distal non-mGene mQTLs
cg05049280	chr1	109612914	109612913	rs11312348:110150762:TA:T	109608140	109608141	0	8.38244e-13	0.200624	0.0256361	FALSE	11789	Distal mGene mQTLs
cg21451998	chr1	109655619	109655618	rs56097627:110198129:CAAA:C	109655507	109655510	0	3.35166e-13	0.234099	0.0293078	TRUE	574	Promoter mGene mQTLs
cg06932256	chr1	109655726	109655725	kgp3155172	109656105	109656105	0	2.01912e-09	0.189732	0.029711	FALSE	-24	Promoter mGene mQTLs
cg09245789	chr1	109655921	109655920	kgp3155172	109656105	109656105	0	3.17164e-13	0.272514	0.0340757	FALSE	-24	Promoter mGene mQTLs
cg01564068	chr1	109655947	109655946	kgp3155172	109656105	109656105	0	4.3231e-17	0.714767	0.0751098	FALSE	-24	Promoter mGene mQTLs
cg03075996	chr1	109655950	109655949	kgp3155172	109656105	109656105	0	2.05091e-16	0.76395	0.082537	TRUE	-24	Promoter mGene mQTLs
cg15069758	chr1	109656110	109656109	kgp3155172	109656105	109656105	0	1.21552e-15	0.177808	0.0198538	FALSE	-24	Promoter mGene mQTLs
cg22711251	chr1	109656188	109656187	kgp3155172	109656105	109656105	0	1.61627e-18	0.469712	0.0466861	FALSE	-24	Promoter mGene mQTLs
cg22247664	chr1	109656505	109656504	kgp3155172	109656105	109656105	0	3.83932e-24	0.576504	0.0473612	FALSE	-24	Promoter mGene mQTLs
cg00297950	chr1	109739904	109739903	rs10735234:110281941:G:A	109739319	109739319	0	4.16873e-19	-0.817808	0.0795216	FALSE	1719	Promoter mGene mQTLs
cg10807101	chr1	109739653	109739652	rs1332018:110282972:G:T	109740350	109740350	0	1.32374e-25	-0.352253	0.0276949	FALSE	688	Promoter mGene mQTLs
cg23645476	chr1	109739851	109739850	rs1332018:110282972:G:T	109740350	109740350	0	2.2254e-15	-0.708763	0.0800562	FALSE	688	Promoter mGene mQTLs
cg02880629	chr1	109740654	109740653	rs1332018:110282972:G:T	109740350	109740350	0	2.45768e-14	-0.186021	0.0220343	FALSE	688	Promoter mGene mQTLs
cg07143279	chr1	110052989	110052988	rs3820664:110606081:C:T	110063459	110063459	0	3.43742e-11	-0.233252	0.0325963	FALSE	-31882	Distal mGene mQTLs
cg10634136	chr1	110608542	110608541	rs192157976:111136962:T:C	110594340	110594340	0	1.7161e-07	0.230178	0.0419653	FALSE	37134	Distal non-mGene mQTLs
cg13938497	chr1	110607557	110607556	rs12086457:111140160:A:G	110597538	110597538	0	3.50557e-07	-0.33683	0.0631714	FALSE	33936	Distal mGene mQTLs
cg00791468	chr1	110606363	110606362	rs3887820	110605458	110605458	0	3.94023e-10	0.481723	0.0718989	FALSE	26016	Distal mGene mQTLs
cg23874078	chr1	111139527	111139526	rs3762374:111682118:C:T	111139496	111139496	0	3.37187e-25	0.221343	0.0176127	FALSE	131	Promoter mGene mQTLs
cg10921191	chr1	111449215	111449214	rs1264897:111993224:C:T	111450602	111450602	0	1.17413e-12	0.121193	0.0156055	TRUE	-1738	Promoter mGene mQTLs
cg21539903	chr1	111508151	111508150	rs12083507:112050944:G:A	111508322	111508322	0	1.58838e-23	0.648966	0.0543426	FALSE	55640	Distal non-mGene mQTLs
cg12097325	chr1	111991128	111991127	rs66461719:112534017:T:TG	111991395	111991395	0	2.23821e-11	0.260896	0.0360625	TRUE	-2240	Promoter non-mGene mQTLs
cg22444562	chr1	111988642	111988641	rs9429671:112790566:C:T	112247944	112247944	0	1.75332e-06	-0.120115	0.0241354	FALSE	112584	Distal non-mGene mQTLs
cg07005055	chr1	112509546	112509545	rs12136566:113051074:A:G	112508452	112508452	0	1.17572e-16	0.471912	0.0504766	FALSE	-41911	Distal mGene mQTLs
cg24087884	chr1	112707105	112707104	rs3806443:113249486:C:G	112706864	112706864	0	4.12094e-08	-0.533558	0.092263	TRUE	570	Promoter mGene mQTLs
cg23175215	chr1	113073012	113073011	rs41283098:113615661:G:A	113073039	113073039	0	3.0812e-09	0.19328	0.030663	TRUE	170	Promoter mGene mQTLs
cg05114234	chr1	113073023	113073022	rs41283098:113615661:G:A	113073039	113073039	0	1.49143e-15	0.216403	0.0242571	FALSE	170	Promoter mGene mQTLs
cg11169316	chr1	113905927	113905926	rs7513707:114445880:G:A	113903258	113903258	0	5.69342e-07	0.147665	0.0282527	FALSE	1943	Promoter mGene mQTLs
cg15976388	chr1	114154325	114154324	rs11582324:114697001:A:G	114154379	114154379	0	4.51113e-12	0.171724	0.0228196	FALSE	-460	Promoter mGene mQTLs
cg20115925	chr1	115764862	115764861	rs6684209:116250612:C:T	115707991	115707991	0	1.96186e-08	0.197563	0.0332904	FALSE	60790	Distal mGene mQTLs
cg10290455	chr1	115768779	115768778	rs4484922:116310818:G:C	115768197	115768197	0	8.31277e-07	-0.172903	0.0336166	TRUE	584	Promoter mGene mQTLs
cg24806360	chr1	115977697	115977696	rs2452551:116519957:C:T	115977336	115977336	0	2.2128e-07	-0.199306	0.0366991	TRUE	-838	Promoter non-mGene mQTLs
cg20383390	chr1	117366401	117366400	rs7540437:117911833:G:A	117369211	117369211	0	9.47627e-12	0.27492	0.0371956	FALSE	-1762	Promoter mGene mQTLs
cg20306265	chr1	117615003	117615002	rs34754277:118147892:T:C	117605270	117605270	0	4.07299e-18	-0.316062	0.0318982	FALSE	664	Promoter mGene mQTLs
cg05088098	chr1	119004306	119004305	rs12724798:119605218:C:T	119062595	119062595	1	2.6317e-09	-1.43428	0.226433	FALSE	-15190	Distal non-mGene mQTLs
cg21635230	chr1	119004376	119004375	rs12724798:119605218:C:T	119062595	119062595	0	2.46318e-13	-1.71364	0.213094	FALSE	-15190	Distal non-mGene mQTLs
cg26875637	chr1	118981701	118981700	rs4659146:119645535:C:T	119102912	119102912	0	1.58549e-08	0.148434	0.0248316	FALSE	37759	Distal non-mGene mQTLs
cg19316303	chr1	119140423	119140422	rs10923754	119126017	119126017	0	1.45735e-12	0.147279	0.0190589	FALSE	14654	Distal mGene mQTLs
cg25216580	chr1	119631367	119631366	rs147849165:120174206:CCCCCGCTTGGG:C	119631583	119631594	0	1.65498e-08	-0.131316	0.0219999	FALSE	16190	Distal mGene mQTLs
cg26421413	chr1	119659607	119659606	rs561931:120254506:A:G	119711883	119711883	0	8.71847e-07	-0.10947	0.0213274	TRUE	-52085	Distal non-mGene mQTLs
cg08692937	chr1	119675074	119675073	rs561931:120254506:A:G	119711883	119711883	0	2.0532e-47	2.18281	0.102047	FALSE	-52085	Distal non-mGene mQTLs
cg10020892	chr1	147545132	147545131	rs656323:147017140:T:C	147545370	147545370	0	1.17586e-06	-0.180155	0.035559	TRUE	-3958	Distal mGene mQTLs
cg12479878	chr1	148309105	148309104	rs539114:147807110:A:T	148334986	148334986	0	7.63369e-20	-0.439732	0.0416316	TRUE	-432	Promoter non-mGene mQTLs
cg19306970	chr1	148328966	148328965	rs539114:147807110:A:T	148334986	148334986	0	6.01263e-07	-0.0907097	0.0173952	FALSE	-432	Promoter non-mGene mQTLs
cg02455346	chr1	148328979	148328978	rs539114:147807110:A:T	148334986	148334986	0	1.84805e-10	-0.306541	0.044796	TRUE	-432	Promoter non-mGene mQTLs
cg07584855	chr1	148334049	148334048	rs539114:147807110:A:T	148334986	148334986	0	8.68243e-20	-0.446566	0.0423631	FALSE	-432	Promoter non-mGene mQTLs
cg07345934	chr1	149917779	149917778	rs3738319	149843756	149843756	0	3.09994e-08	0.216177	0.0370078	TRUE	-715	Promoter non-mGene mQTLs
cg20318096	chr1	149917813	149917812	rs3738319	149843756	149843756	0	3.05583e-08	0.213301	0.036497	FALSE	-715	Promoter non-mGene mQTLs
cg21058413	chr1	150187663	150187662	rs2027349	150067621	150067621	0	3.41968e-08	-0.166896	0.0286698	FALSE	-328	Promoter non-mGene mQTLs
cg18529259	chr1	150283471	150283470	rs2318761:150257714:A:G	150285304	150285304	0	1.79111e-09	-0.193835	0.0302432	FALSE	-2761	Distal mGene mQTLs
cg01544890	chr1	150362913	150362912	rs11584070:150294925:A:G	150322476	150322476	0	4.31955e-11	-0.465883	0.065491	TRUE	-1000	Promoter non-mGene mQTLs
cg16193928	chr1	150516330	150516329	rs10712406:150488722:CA:C	150516246	150516247	0	2.3582e-09	-0.123251	0.0193923	TRUE	-489	Promoter non-mGene mQTLs
cg18801370	chr1	151458017	151458016	rs12071705:151430504:G:C	151458028	151458028	0	2.15395e-22	0.309829	0.0268973	FALSE	1437	Promoter mGene mQTLs
cg07928641	chr1	151722003	151722002	rs17568246:151736456:A:G	151763980	151763980	0	3.83363e-24	0.633073	0.0520074	FALSE	-1081	Promoter non-mGene mQTLs
cg07092448	chr1	151790738	151790737	rs1521185:151764049:A:G	151791573	151791573	0	5.16238e-27	0.525309	0.0396557	FALSE	-157	Promoter mGene mQTLs
cg13563504	chr1	151805780	151805779	rs2293088:151777651:G:A	151805175	151805175	0	5.38425e-08	-0.123269	0.021521	FALSE	979	Promoter mGene mQTLs
cg14134508	chr1	151806320	151806319	rs2293088:151777651:G:A	151805175	151805175	0	5.94483e-09	-0.157024	0.0254338	FALSE	979	Promoter mGene mQTLs
cg14817175	chr1	151837059	151837058	rs10888439:151812032:C:T	151839556	151839556	0	5.3247e-07	0.159045	0.030345	FALSE	1001	Promoter non-mGene mQTLs
cg20817062	chr1	151839448	151839447	rs2130529:151816049:A:C	151843573	151843573	0	8.38883e-07	-0.145092	0.0282205	FALSE	-1696	Promoter non-mGene mQTLs
cg08029281	chr1	151117107	151117106	rs75645053:151880098:C:A	151907622	151907622	0	7.18903e-08	0.557617	0.0983822	TRUE	2186	Promoter non-mGene mQTLs
cg04205715	chr1	152224199	152224198	rs10788825:152161709:G:A	152189233	152189233	1	2.76443e-07	0.597471	0.110989	FALSE	-21108	Distal non-mGene mQTLs
cg02331910	chr1	153627356	153627355	rs999418:153600124:T:C	153627648	153627648	0	1.59312e-09	0.144143	0.0224104	FALSE	3712	Distal mGene mQTLs
cg13364689	chr1	154559418	154559417	exm2259811	154559434	154559434	0	1.00607e-09	0.477734	0.0732634	FALSE	-406	Promoter mGene mQTLs
cg16489975	chr1	154760960	154760959	rs6682291	154760300	154760300	0	6.54881e-07	0.231759	0.0446041	FALSE	109980	Distal mGene mQTLs
cg06418219	chr1	154975830	154975829	rs12087657:154948327:G:T	154975851	154975851	0	3.76943e-24	0.545409	0.0447957	FALSE	-1456	Promoter mGene mQTLs
cg22505006	chr1	155009354	155009353	rs6686021:154983539:C:T	155011063	155011063	0	8.47667e-08	-0.144692	0.0256842	FALSE	-8433	Distal mGene mQTLs
cg19352308	chr1	155033624	155033623	rs4845405:155007302:C:A	155034826	155034826	0	2.90719e-16	-0.263255	0.0286232	TRUE	-1045	Promoter mGene mQTLs
cg21504176	chr1	155033643	155033642	rs4845704:155008318:C:A	155035842	155035842	0	2.19073e-11	-0.176724	0.0244145	FALSE	-2061	Promoter mGene mQTLs
cg09363892	chr1	155087697	155087696	rs4845708:155053728:C:T	155081252	155081252	0	5.46309e-21	-0.351886	0.0320098	FALSE	-2380	Promoter non-mGene mQTLs
cg22049894	chr1	155140671	155140670	rs4971073:155113104:G:T	155140628	155140628	0	3.21715e-08	0.0669322	0.0114732	FALSE	-33	Promoter mGene mQTLs
cg00228018	chr1	155929214	155929213	rs4661175:155931368:G:A	155961577	155961577	0	1.14682e-33	-0.896409	0.056824	FALSE	45493	Distal non-mGene mQTLs
cg12639442	chr1	156084594	156084593	rs74965833:156054119:C:T	156084328	156084328	0	7.71618e-08	0.194187	0.0343504	TRUE	-1755	Promoter mGene mQTLs
cg06660332	chr1	155859136	155859135	rs11578696:156056968:A:G	156087177	156087177	0	2.40705e-07	0.151682	0.0280227	TRUE	-5179	Distal non-mGene mQTLs
cg27042782	chr1	156248550	156248549	rs11389824:156306071:A:AT	156336280	156336280	0	2.12671e-11	0.245008	0.0338226	TRUE	1034	Promoter non-mGene mQTLs
cg14087168	chr1	156480878	156480877	rs1171557:156451264:C:T	156481472	156481472	0	8.42645e-09	-0.090541	0.014832	FALSE	19356	Distal mGene mQTLs
cg27428660	chr1	156754486	156754485	1:156470497:G:C	156500705	156500705	0	3.9595e-07	-0.582474	0.109783	TRUE	123	Promoter non-mGene mQTLs
cg11230062	chr1	156624897	156624896	rs11576266:156572159:A:G	156602367	156602367	0	4.54104e-08	0.144272	0.025034	FALSE	-871	Promoter non-mGene mQTLs
cg22621589	chr1	155934486	155934485	rs16837619:156674046:C:A	156704254	156704254	0	6.26891e-09	0.834165	0.135344	TRUE	1562	Promoter non-mGene mQTLs
cg08264335	chr1	156735608	156735607	rs12125515:156709602:T:G	156739810	156739810	0	8.72097e-08	0.20009	0.0355554	FALSE	1780	Promoter non-mGene mQTLs
cg02778613	chr1	156920822	156920821	rs866068:156897967:G:C	156928175	156928175	0	1.69277e-07	-0.131892	0.0240333	FALSE	-7525	Distal mGene mQTLs
cg26267890	chr1	156913954	156913953	rs144913510:157044691:C:CT	157074899	157074899	0	1.28852e-06	0.103756	0.0205624	TRUE	-1642	Promoter non-mGene mQTLs
cg22546158	chr1	160176607	160176606	exm2268770	160175105	160175105	0	7.1775e-08	0.18573	0.032767	TRUE	-23535	Distal mGene mQTLs
cg00446235	chr1	161038855	161038854	rs3766383:161008572:C:A	161038782	161038782	0	2.12715e-13	-0.512681	0.0635497	FALSE	208	Promoter mGene mQTLs
cg07385423	chr1	161727785	161727784	rs6658140:161696900:A:T	161727110	161727110	0	1.30044e-07	0.177077	0.0319423	FALSE	-5547	Distal mGene mQTLs
cg10810183	chr1	162024198	162024197	rs4657136:161994010:G:T	162024220	162024220	0	2.35976e-17	0.245851	0.0255638	FALSE	-366	Promoter mGene mQTLs
cg19814518	chr1	162497291	162497290	rs10919549:162467014:C:G	162497224	162497224	0	2.21695e-30	-0.692907	0.0477319	FALSE	27	Promoter mGene mQTLs
cg00859178	chr1	162497419	162497418	rs10919549:162467014:C:G	162497224	162497224	0	2.02351e-32	-0.636811	0.0416351	FALSE	27	Promoter mGene mQTLs
cg22657016	chr1	162497326	162497325	rs6667797:162469091:G:A	162499301	162499301	0	3.37624e-29	-0.408419	0.0290302	FALSE	-2050	Promoter mGene mQTLs
cg15103675	chr1	162561730	162561729	rs28384483:162531494:C:T	162561704	162561704	0	2.53497e-14	0.446158	0.052881	FALSE	-198	Promoter mGene mQTLs
cg07521829	chr1	163322451	163322450	rs2292275:163292217:T:C	163322427	163322427	0	4.04551e-12	0.141738	0.018786	FALSE	-55851	Distal mGene mQTLs
cg18206481	chr1	165235266	165235265	rs112950764:165204400:GC:G	165235163	165235164	1	6.27828e-09	0.846763	0.137395	FALSE	121552	Distal mGene mQTLs
cg27590049	chr1	165235963	165235962	rs4657418:165205078:G:C	165235841	165235841	0	2.59932e-11	-0.140334	0.0194715	FALSE	120874	Distal mGene mQTLs
cg13901501	chr1	165445278	165445277	rs3753897:165414511:C:A	165445274	165445274	0	1.43074e-13	0.225544	0.0277192	FALSE	81	Promoter mGene mQTLs
cg06972794	chr1	165602044	165602043	rs10800113:165571573:A:G	165602336	165602336	0	3.14102e-07	-0.0988985	0.018466	FALSE	-3873	Distal non-mGene mQTLs
cg08510884	chr1	165632041	165632040	rs12040685:165599858:G:A	165630621	165630621	0	9.52288e-24	0.217193	0.0180616	FALSE	240	Promoter mGene mQTLs
cg21165486	chr1	165637621	165637620	rs4147596:165601365:T:C	165632128	165632128	0	6.2807e-09	0.105975	0.0171957	FALSE	-1267	Promoter mGene mQTLs
cg10234330	chr1	165769658	165769657	rs7518099:165736880:C:T	165767643	165767643	0	3.588e-12	0.333717	0.0441047	FALSE	60112	Distal mGene mQTLs
cg01427815	chr1	165842748	165842747	rs6426941:165811486:C:A	165842249	165842249	0	1.10456e-25	-0.368698	0.0289209	FALSE	-14718	Distal mGene mQTLs
cg17936236	chr1	167551069	167551068	rs16859185:167513648:G:C	167544411	167544411	0	1.61002e-17	0.383996	0.0396662	FALSE	9356	Distal mGene mQTLs
cg19948045	chr1	167547132	167547131	rs10918711:167515132:C:T	167545895	167545895	0	6.96606e-12	0.186208	0.0250047	FALSE	7872	Distal mGene mQTLs
cg20480045	chr1	168225709	168225708	rs4656572:168194927:C:T	168225689	168225689	0	4.14869e-12	0.178611	0.0236873	FALSE	249	Promoter mGene mQTLs
cg15041339	chr1	169103648	169103647	1:169075857:C:CCCG	169106619	169106619	0	1.35558e-17	0.239868	0.0247051	TRUE	-922	Promoter non-mGene mQTLs
cg23826681	chr1	169105573	169105572	rs1200130:169078572:C:T	169109334	169109334	0	6.21676e-07	0.0811063	0.0155754	FALSE	-3637	Distal mGene mQTLs
cg26204283	chr1	169794322	169794321	rs79945836:169763807:G:C	169794666	169794666	0	1.09973e-14	0.455344	0.0530666	FALSE	300	Promoter mGene mQTLs
cg14805718	chr1	169586775	169586774	rs57805301:169776626:A:C	169807485	169807485	1	1.21564e-06	1.00997	0.199641	FALSE	-145478	Distal non-mGene mQTLs
cg16325326	chr1	173503485	173503484	rs35846760:173446338:A:AGCCCC	173477199	173477199	0	1.5244e-06	0.145782	0.0291085	TRUE	67	Promoter non-mGene mQTLs
cg11973900	chr1	175193175	175193174	rs10912903:175161930:C:G	175192794	175192794	0	1.25124e-12	-0.13991	0.0180419	FALSE	205	Promoter mGene mQTLs
cg05404729	chr1	175193200	175193199	rs10912903:175161930:C:G	175192794	175192794	0	1.94931e-15	-0.162767	0.0183383	TRUE	205	Promoter mGene mQTLs
cg08873628	chr1	175193212	175193211	rs10912903:175161930:C:G	175192794	175192794	0	4.47071e-09	-0.11374	0.0182563	FALSE	205	Promoter mGene mQTLs
cg00321850	chr1	175193262	175193261	rs10912903:175161930:C:G	175192794	175192794	0	4.32078e-08	-0.130099	0.0225347	FALSE	205	Promoter mGene mQTLs
cg01808492	chr1	175192652	175192651	rs3753557:175162489:G:A	175193353	175193353	0	1.60866e-08	0.13818	0.0231276	FALSE	-354	Promoter mGene mQTLs
cg00099768	chr1	175193001	175193000	rs3753557:175162489:G:A	175193353	175193353	0	3.22389e-16	-0.174461	0.0190048	FALSE	-354	Promoter mGene mQTLs
cg22764845	chr1	175193228	175193227	rs3753557:175162489:G:A	175193353	175193353	0	3.19843e-17	-0.183563	0.0191881	FALSE	-354	Promoter mGene mQTLs
cg24373540	chr1	176950435	176950434	rs2076073:176918504:A:G	176949368	176949368	0	5.48843e-10	0.348103	0.0524495	FALSE	215605	Distal mGene mQTLs
cg19583968	chr1	179081777	179081776	rs75317895:178994764:A:G	179025629	179025629	0	2.39555e-11	0.6291	0.0871077	FALSE	175	Promoter non-mGene mQTLs
cg08376771	chr1	179591535	179591534	rs76644806:179561154:C:T	179592019	179592019	0	1.78585e-11	-0.115626	0.0158918	FALSE	-406	Promoter mGene mQTLs
cg06656994	chr1	179744042	179744041	rs2454193:179712616:G:T	179743481	179743481	0	5.53103e-07	0.112761	0.0215483	TRUE	-318	Promoter mGene mQTLs
cg25369168	chr1	179815361	179815360	rs2236589:179783922:T:A	179814787	179814787	0	2.80221e-18	0.352253	0.0353304	FALSE	-71624	Distal mGene mQTLs
cg08569016	chr1	180154657	180154656	rs7531169:180123812:A:G	180154677	180154677	0	1.84862e-08	0.132381	0.0222617	TRUE	157	Promoter mGene mQTLs
cg08812504	chr1	180154664	180154663	rs7531169:180123812:A:G	180154677	180154677	0	5.37353e-10	0.111839	0.0168408	TRUE	157	Promoter mGene mQTLs
cg09505809	chr1	180154088	180154087	rs6425611:180127107:A:C	180157972	180157972	0	7.20397e-07	0.142513	0.027539	FALSE	-3138	Distal mGene mQTLs
cg16999099	chr1	180232005	180232004	rs11584346:180201124:C:T	180231989	180231989	0	2.06604e-24	1.28321	0.104555	FALSE	-1703	Promoter mGene mQTLs
cg20875021	chr1	180631406	180631405	rs10157637:180600350:T:C	180631214	180631214	0	3.76511e-15	0.390995	0.0446146	FALSE	790	Promoter mGene mQTLs
cg05149108	chr1	180953781	180953780	rs141789904:180901510:T:TA	180932374	180932374	0	1.39212e-06	-0.248905	0.0494978	TRUE	-19220	Distal non-mGene mQTLs
cg08838517	chr1	180954434	180954433	rs76014269:180923595:G:A	180954459	180954459	0	1.36672e-09	0.505744	0.0782687	FALSE	428	Promoter non-mGene mQTLs
cg06128826	chr1	180977631	180977630	rs1044595:180943529:C:T	180974393	180974393	0	2.60265e-07	0.115181	0.0213452	TRUE	48728	Distal mGene mQTLs
cg17999527	chr1	182391785	182391784	rs912902:182360930:A:G	182391795	182391795	0	2.66448e-14	0.143473	0.0170226	FALSE	411	Promoter mGene mQTLs
cg11391335	chr1	182588412	182588411	rs610367:182571003:C:T	182601868	182601868	0	1.59429e-17	0.448772	0.0463496	FALSE	2540	Distal non-mGene mQTLs
cg22378919	chr1	182588848	182588847	rs610367:182571003:C:T	182601868	182601868	0	3.87182e-24	0.597107	0.0490593	FALSE	2540	Distal non-mGene mQTLs
cg16990168	chr1	182589234	182589233	rs610367:182571003:C:T	182601868	182601868	0	9.63737e-18	0.37299	0.0381933	FALSE	2540	Distal non-mGene mQTLs
cg05172122	chr1	182589273	182589272	rs610367:182571003:C:T	182601868	182601868	0	2.12954e-24	0.465762	0.0379652	FALSE	2540	Distal non-mGene mQTLs
cg13080379	chr1	182589414	182589413	rs610367:182571003:C:T	182601868	182601868	0	3.42275e-19	0.33869	0.0328299	FALSE	2540	Distal non-mGene mQTLs
cg25755283	chr1	182589636	182589635	rs610367:182571003:C:T	182601868	182601868	0	1.65303e-25	0.649373	0.0512003	FALSE	2540	Distal non-mGene mQTLs
cg03760839	chr1	182589721	182589720	rs610367:182571003:C:T	182601868	182601868	0	4.16276e-15	0.206993	0.0236652	FALSE	2540	Distal non-mGene mQTLs
cg14565725	chr1	182589741	182589740	rs610367:182571003:C:T	182601868	182601868	0	8.71287e-21	0.299079	0.0273958	FALSE	2540	Distal non-mGene mQTLs
cg08554947	chr1	183633974	183633973	rs17488675:183592570:C:T	183623435	183623435	0	1.78337e-10	-0.229644	0.033526	FALSE	12322	Distal mGene mQTLs
cg04200073	chr1	184037984	184037983	rs114661926:184006549:C:G	184037415	184037415	0	1.34352e-06	-0.117837	0.0233963	TRUE	314	Promoter mGene mQTLs
cg18132279	chr1	186977463	186977462	rs10798076:186944688:G:A	186975556	186975556	0	2.8146e-15	0.311032	0.0352909	FALSE	-146603	Distal mGene mQTLs
cg05576974	chr1	193059009	193059008	rs4657842:193028121:A:T	193058991	193058991	0	1.07149e-12	0.205798	0.0264445	FALSE	431	Promoter mGene mQTLs
cg14851608	chr1	193303580	193303579	exm133014	193105381	193105381	0	7.03519e-16	-1.18265	0.130703	TRUE	733	Promoter non-mGene mQTLs
cg00114966	chr1	197924791	197924790	1:197894018:AT:A	197924888	197924889	0	5.08243e-18	-0.252602	0.0255881	FALSE	-12986	Distal mGene mQTLs
cg19624630	chr1	198160507	198160506	rs6690957:198170962:C:T	198201832	198201832	0	3.06009e-09	0.329023	0.0521869	FALSE	-44869	Distal mGene mQTLs
cg19523145	chr1	200302638	200302637	rs819637:200271343:G:C	200302215	200302215	0	9.45681e-11	0.189245	0.0271575	FALSE	98490	Distal non-mGene mQTLs
cg17766148	chr1	201114995	201114994	rs4498834:201080298:T:C	201111170	201111170	0	9.15014e-18	0.425392	0.0435207	FALSE	16014	Distal mGene mQTLs
cg09820101	chr1	201115339	201115338	rs4498834:201080298:T:C	201111170	201111170	0	9.6882e-08	0.0882942	0.0157512	FALSE	1396	Promoter non-mGene mQTLs
cg00891176	chr1	201113604	201113603	rs2281846:201081777:C:G	201112649	201112649	0	2.3053e-09	0.157988	0.0248406	TRUE	-83	Promoter mGene mQTLs
cg18152455	chr1	201119410	201119409	rs2281845	201112815	201112815	0	1.73342e-15	0.227926	0.025622	FALSE	-249	Promoter non-mGene mQTLs
cg19765450	chr1	201112255	201112254	rs78013107:201085321:G:A	201116193	201116193	0	6.03999e-08	0.176469	0.0309376	FALSE	-3627	Distal mGene mQTLs
cg01839430	chr1	201114992	201114991	rs7516023:201085521:C:T	201116393	201116393	0	6.40625e-24	0.512699	0.0424088	FALSE	-3827	Distal non-mGene mQTLs
cg23555638	chr1	201154601	201154600	rs4915486:201110963:C:T	201141835	201141835	0	5.59448e-19	0.189599	0.0185232	FALSE	29739	Distal mGene mQTLs
cg08162294	chr1	201154639	201154638	rs4915486:201110963:C:T	201141835	201141835	0	1.37622e-24	0.187517	0.0151972	FALSE	29739	Distal mGene mQTLs
cg07720334	chr1	201468171	201468170	rs863826:201133774:G:A	201164646	201164646	0	2.31852e-07	-0.0694649	0.0128144	TRUE	6928	Distal non-mGene mQTLs
cg01022117	chr1	201289153	201289152	rs2300293	201295774	201295774	0	1.36026e-13	-0.337406	0.041422	FALSE	-12322	Distal mGene mQTLs
cg22488259	chr1	201739373	201739372	rs61821715:201708386:C:T	201739258	201739258	0	1.09594e-11	0.172654	0.0234431	FALSE	-116373	Distal mGene mQTLs
cg14168733	chr1	201739591	201739590	rs61821715:201708386:C:T	201739258	201739258	0	1.8347e-25	0.386997	0.0305539	FALSE	-116373	Distal mGene mQTLs
cg04919516	chr1	201739292	201739291	rs12026046	201739294	201739294	0	9.17006e-16	0.346812	0.0385194	FALSE	-116409	Distal mGene mQTLs
cg20208069	chr1	201888566	201888565	rs67531894:201877904:C:T	201908776	201908776	0	8.9618e-17	0.285814	0.0304233	FALSE	37812	Distal non-mGene mQTLs
cg02102566	chr1	201888623	201888622	rs67531894:201877904:C:T	201908776	201908776	0	3.27077e-21	1.13675	0.102626	FALSE	37812	Distal non-mGene mQTLs
cg08221548	chr1	201888629	201888628	rs67531894:201877904:C:T	201908776	201908776	0	5.63431e-26	0.356444	0.0277219	FALSE	37812	Distal non-mGene mQTLs
cg20535221	chr1	202129963	202129962	rs6676433:202093628:A:G	202124500	202124500	0	6.08341e-10	-0.282158	0.0426396	TRUE	-1642	Promoter non-mGene mQTLs
cg10734950	chr1	202809638	202809637	rs10699901:202778804:A:AAG	202809676	202809676	0	2.39534e-21	-0.262497	0.0235903	TRUE	-206	Promoter mGene mQTLs
cg21105875	chr1	202809742	202809741	rs10699901:202778804:A:AAG	202809676	202809676	0	1.49241e-07	-0.341683	0.06196	FALSE	-206	Promoter mGene mQTLs
cg16990280	chr1	202811930	202811929	rs2275895	202811402	202811402	0	7.04566e-17	0.203743	0.0215949	FALSE	-1932	Promoter non-mGene mQTLs
cg07655965	chr1	202967884	202967883	rs35989591:202924527:AT:A	202955399	202955400	0	8.50607e-11	-0.274222	0.0392411	FALSE	3173	Distal non-mGene mQTLs
cg00617064	chr1	202967987	202967986	rs35989591:202924527:AT:A	202955399	202955400	0	8.35398e-11	-0.133745	0.0191297	FALSE	3173	Distal non-mGene mQTLs
cg07771034	chr1	202967423	202967422	rs35356717:202936527:G:T	202967399	202967399	0	3.40835e-08	0.141794	0.0243549	TRUE	-119	Promoter mGene mQTLs
cg25482438	chr1	203186757	203186756	rs4950928:203155882:G:C	203186754	203186754	0	1.64392e-14	-0.238066	0.0279697	TRUE	-5	Promoter mGene mQTLs
cg24337809	chr1	203305755	203305754	rs7534752:203279039:G:T	203309911	203309911	0	8.38969e-07	0.269048	0.0523304	FALSE	-4420	Distal mGene mQTLs
cg01739509	chr1	203351605	203351604	rs4971252:203320408:G:C	203351280	203351280	0	8.11585e-07	-0.147555	0.0286589	TRUE	209	Promoter mGene mQTLs
cg11216917	chr1	204075382	204075381	rs78714973:204053926:G:GTTC	204084798	204084798	0	2.8439e-07	-0.222492	0.0413779	FALSE	-11683	Distal mGene mQTLs
cg08942386	chr1	204196982	204196981	rs72749756:204175367:C:T	204206239	204206239	0	2.37799e-08	-0.20833	0.0353373	FALSE	7853	Distal non-mGene mQTLs
cg01177928	chr1	204377807	204377806	rs10494854	204354746	204354746	0	1.18692e-06	-0.0794165	0.0156817	FALSE	22919	Distal non-mGene mQTLs
cg20148187	chr1	204412125	204412124	rs5007570:204381238:G:T	204412110	204412110	0	4.42745e-10	0.296735	0.0444357	FALSE	-319	Promoter mGene mQTLs
cg12456798	chr1	204630426	204630425	rs10793713:204607235:A:G	204638107	204638107	0	7.47352e-09	0.116256	0.0189701	TRUE	47626	Distal mGene mQTLs
cg14957195	chr1	205003162	205003161	rs2802839:204972288:G:T	205003160	205003160	0	9.06606e-28	-0.502673	0.0371514	FALSE	-174509	Distal mGene mQTLs
cg21728107	chr1	205247858	205247857	rs370647985:205216972:G:A	205247844	205247844	0	9.06052e-07	0.385548	0.0752389	TRUE	-19668	Distal mGene mQTLs
cg10768996	chr1	205266875	205266874	rs1172113:205226288:T:C	205257160	205257160	0	1.2339e-12	0.176734	0.0227832	FALSE	-28984	Distal mGene mQTLs
cg26605712	chr1	205275267	205275266	rs1668871	205268009	205268009	0	1.16486e-07	0.139732	0.0251006	FALSE	-39833	Distal non-mGene mQTLs
cg25730298	chr1	205275317	205275316	rs1668871	205268009	205268009	0	7.10465e-18	0.223612	0.0227794	FALSE	-39833	Distal non-mGene mQTLs
cg13935009	chr1	205528586	205528585	rs7531230:205498021:T:C	205528893	205528893	0	1.10974e-13	0.2027	0.0247768	FALSE	-24298	Distal mGene mQTLs
cg16665231	chr1	205592679	205592678	rs35117752:205561913:T:TC	205592785	205592785	0	1.98415e-22	0.419283	0.0363573	FALSE	-23900	Distal non-mGene mQTLs
cg01183862	chr1	205592779	205592778	rs35117752:205561913:T:TC	205592785	205592785	0	1.68013e-16	0.623168	0.0670844	FALSE	-23900	Distal non-mGene mQTLs
cg22307414	chr1	205632290	205632289	rs3088136:205601464:G:C	205632336	205632336	0	6.36894e-10	-0.117426	0.0177689	FALSE	-374	Promoter mGene mQTLs
cg09413723	chr1	205850336	205850335	rs823074:205774839:T:C	205805711	205805711	0	1.55865e-30	0.7895	0.0541689	FALSE	8037	Distal non-mGene mQTLs
cg09465560	chr1	205850473	205850472	rs823074:205774839:T:C	205805711	205805711	0	1.92287e-26	0.485945	0.0372867	FALSE	8037	Distal non-mGene mQTLs
cg03827427	chr1	205813882	205813881	rs823074:205774839:T:C	205805711	205805711	0	2.72997e-17	-0.251373	0.0262041	FALSE	8037	Distal mGene mQTLs
cg23034840	chr1	205813395	205813394	rs56152218:205782509:C:T	205813381	205813381	0	3.4291e-22	0.244501	0.0213661	FALSE	367	Promoter mGene mQTLs
cg17558126	chr1	206506918	206506917	rs3813976:206680303:C:T	206506970	206506970	0	6.74595e-13	0.118435	0.0150599	FALSE	560	Promoter mGene mQTLs
cg19452316	chr1	206507634	206507633	rs2095124:206680983:A:C	206507650	206507650	0	7.0171e-18	0.259772	0.0264575	FALSE	-120	Promoter mGene mQTLs
cg17220933	chr1	206556286	206556285	rs71633591:206730641:C:A	206557313	206557313	0	1.19907e-10	-0.12005	0.017338	FALSE	-49783	Distal mGene mQTLs
cg13509283	chr1	206612826	206612825	rs3813967:206786006:C:G	206612653	206612653	0	3.20148e-08	0.30871	0.0529083	FALSE	-190	Promoter non-mGene mQTLs
cg23576477	chr1	206714366	206714365	rs4077462:206910120:G:A	206736775	206736775	0	3.1163e-08	0.381738	0.0653625	TRUE	-51831	Distal mGene mQTLs
cg11133623	chr1	207866859	207866858	rs926628:208040165:T:C	207866820	207866820	0	3.39209e-10	0.245431	0.0364767	FALSE	12276	Distal non-mGene mQTLs
cg26050864	chr1	209676101	209676100	kgp2722084	209675657	209675657	0	1.28172e-10	-0.14169	0.0205002	FALSE	-237	Promoter mGene mQTLs
cg04352962	chr1	209806412	209806411	rs151296501:209979997:AGCTTCTTG:A	209806652	209806660	0	4.84197e-21	0.277817	0.025227	FALSE	-477	Promoter mGene mQTLs
cg14423246	chr1	209845314	209845313	rs68084857:210002837:TC:T	209829492	209829493	0	1.03717e-18	-0.315735	0.0311554	TRUE	-1485	Promoter mGene mQTLs
cg16090143	chr1	209806033	209806032	rs3766614:210019701:G:A	209846356	209846356	0	1.99575e-07	0.146903	0.0269405	FALSE	-18349	Distal non-mGene mQTLs
cg10778042	chr1	210727126	210727125	lipidsMI0.0001_notinGLGC_chr1_210901241	210727899	210727899	0	8.65225e-08	-0.584349	0.103806	TRUE	232874	Distal mGene mQTLs
cg14496951	chr1	211382392	211382391	rs41303051:211556131:C:G	211382789	211382789	0	3.61176e-08	0.559689	0.0963304	FALSE	14	Promoter non-mGene mQTLs
cg06436493	chr1	211492097	211492096	rs12407592:211660016:T:C	211486674	211486674	0	5.95001e-07	0.0714687	0.0136994	FALSE	6243	Distal mGene mQTLs
cg04805131	chr1	211502015	211502014	rs367700286:211662675:TTTC:T	211489333	211489336	0	9.483e-36	-1.2835	0.0773855	FALSE	2922	Distal non-mGene mQTLs
cg27398908	chr1	211488722	211488721	rs367700286:211662675:TTTC:T	211489333	211489336	0	6.18665e-10	-0.19482	0.0294554	TRUE	3584	Distal mGene mQTLs
cg14264194	chr1	211479208	211479207	rs1122745:211663261:C:T	211489919	211489919	0	6.97198e-09	0.217212	0.0353639	FALSE	2998	Distal mGene mQTLs
cg00658007	chr1	211492788	211492787	rs1122745:211663261:C:T	211489919	211489919	0	1.49874e-20	-0.439367	0.0405751	FALSE	2998	Distal mGene mQTLs
cg06753273	chr1	211493088	211493087	rs1122745:211663261:C:T	211489919	211489919	0	4.66907e-19	-0.473063	0.0460829	FALSE	2998	Distal mGene mQTLs
cg04923746	chr1	211492963	211492962	rs10863899	211492876	211492876	0	8.1715e-20	-0.30053	0.0284827	FALSE	41	Promoter mGene mQTLs
cg24484971	chr1	211493111	211493110	rs10863899	211492876	211492876	0	1.30352e-14	-0.26223	0.030665	FALSE	41	Promoter mGene mQTLs
cg01575408	chr1	211579554	211579553	rs112120082:211752925:GCTGCAAAGT:G	211579583	211579592	0	4.24025e-17	0.294426	0.0309286	FALSE	-841	Promoter mGene mQTLs
cg19477568	chr1	211681593	211681592	rs1773356:211854329:A:G	211680987	211680987	0	1.99416e-07	-0.132598	0.0243164	FALSE	-5225	Distal non-mGene mQTLs
cg01785514	chr1	212815182	212815181	rs200733237:212963895:T:TG	212790553	212790553	0	1.80238e-19	0.804695	0.0772133	TRUE	1275	Promoter mGene mQTLs
cg14810798	chr1	213983483	213983482	rs340879	213983171	213983171	0	4.58364e-19	-0.198785	0.0193587	FALSE	5337	Distal mGene mQTLs
cg24083324	chr1	213989262	213989261	rs340838:214162573:A:T	213989230	213989230	0	1.56289e-13	0.168957	0.0208042	FALSE	-6049	Distal mGene mQTLs
cg16608348	chr1	214551139	214551138	rs111979132:214725198:A:AT	214551855	214551855	0	1.0754e-10	0.231889	0.0333921	FALSE	594	Promoter mGene mQTLs
cg20683815	chr1	214552366	214552365	rs111979132:214725198:A:AT	214551855	214551855	0	3.74366e-07	-0.158849	0.0298713	FALSE	594	Promoter mGene mQTLs
cg11504081	chr1	214552458	214552457	rs111979132:214725198:A:AT	214551855	214551855	0	2.91789e-21	-0.379727	0.0342244	FALSE	594	Promoter mGene mQTLs
cg26119331	chr1	214552481	214552480	rs7550560:214725561:A:G	214552218	214552218	0	1.46429e-12	-0.54652	0.0707309	FALSE	231	Promoter mGene mQTLs
cg10952190	chr1	214552531	214552530	rs7550560:214725561:A:G	214552218	214552218	0	5.40533e-12	-0.205999	0.0274932	FALSE	231	Promoter mGene mQTLs
cg07482917	chr1	220895082	220895081	rs12141189:221053545:T:C	220880203	220880203	0	4.31864e-11	-0.204828	0.0287933	FALSE	-803	Promoter non-mGene mQTLs
cg17484671	chr1	220895389	220895388	rs12141189:221053545:T:C	220880203	220880203	0	4.34275e-08	-0.137289	0.0237845	FALSE	-803	Promoter non-mGene mQTLs
cg04222084	chr1	221742309	221742308	rs4601596:221914458:C:T	221741116	221741116	0	4.08107e-08	-0.44986	0.0777631	FALSE	1060	Promoter mGene mQTLs
cg07736389	chr1	222814157	222814156	rs66605104:222987528:CATT:C	222814186	222814189	0	1.78609e-26	1.03972	0.0797049	TRUE	836	Promoter non-mGene mQTLs
cg10202457	chr1	222814985	222814984	rs72004674:222989414:AATATATAT:A	222816072	222816080	0	6.66869e-13	0.218703	0.0278025	TRUE	-1050	Promoter non-mGene mQTLs
cg04232325	chr1	223364022	223364021	rs1618537:223537385:A:G	223364043	223364043	0	9.61257e-09	0.321464	0.0528886	FALSE	159	Promoter mGene mQTLs
cg06939851	chr1	225924835	225924834	rs77157663:226111945:T:C	225924245	225924245	0	2.47102e-09	-0.327849	0.0516579	TRUE	95	Promoter mGene mQTLs
cg17231522	chr1	226082742	226082741	rs4570386:226270779:G:A	226083078	226083078	0	2.0551e-15	-0.266168	0.0300184	FALSE	561	Promoter non-mGene mQTLs
cg18837946	chr1	226083024	226083023	rs4570386:226270779:G:A	226083078	226083078	0	5.12113e-29	-0.583533	0.0416796	FALSE	561	Promoter non-mGene mQTLs
cg25310490	chr1	226083041	226083040	rs4570386:226270779:G:A	226083078	226083078	0	3.74559e-12	0.147128	0.0194645	FALSE	561	Promoter non-mGene mQTLs
cg12136950	chr1	226662098	226662097	rs697847:226864958:G:A	226677257	226677257	0	1.29272e-08	-0.142933	0.023748	FALSE	62066	Distal mGene mQTLs
cg14255644	chr1	228102047	228102046	rs1128456:228289843:C:T	228102142	228102142	0	1.23677e-11	0.17753	0.0241774	FALSE	3269	Distal mGene mQTLs
cg22408780	chr1	228212719	228212718	rs55873533:228334436:G:A	228146735	228146735	0	2.88242e-08	0.128299	0.0219079	FALSE	-6773	Distal non-mGene mQTLs
cg17031739	chr1	229436382	229436381	rs59228224:229567683:TC:T	229431936	229431937	0	2.70821e-07	-0.135629	0.0251744	TRUE	2162	Promoter non-mGene mQTLs
cg00550925	chr1	230068227	230068226	rs6684422:230210365:A:T	230074618	230074618	0	3.22111e-08	0.126691	0.0217175	TRUE	-16628	Distal mGene mQTLs
cg16698674	chr1	230136612	230136611	1:230246459:C:T	230110712	230110712	0	5.69632e-12	-0.795609	0.106319	TRUE	-52722	Distal mGene mQTLs
cg16246661	chr1	230136865	230136864	1:230246459:C:T	230110712	230110712	0	8.50465e-19	-0.566248	0.0556955	TRUE	-52722	Distal mGene mQTLs
cg23735745	chr1	230112375	230112374	rs754665:230250297:T:C	230114550	230114550	0	7.67135e-22	-0.274399	0.0242562	FALSE	-56560	Distal mGene mQTLs
cg02931783	chr1	230112976	230112975	rs3033644:230258361:CTG:C	230122614	230122616	0	2.02074e-14	-0.220725	0.0260409	TRUE	-64624	Distal mGene mQTLs
cg16698674	chr1	230136612	230136611	rs1973943	230136316	230136316	1	1.11763e-07	0.572535	0.102687	FALSE	-78326	Distal mGene mQTLs
cg26525772	chr1	230136560	230136559	rs6659658:230272380:G:A	230136633	230136633	0	3.14504e-10	0.42939	0.0636818	FALSE	-78643	Distal mGene mQTLs
cg15817769	chr1	230136796	230136795	rs11807834:230272624:G:A	230136877	230136877	0	4.21109e-10	-0.229858	0.034372	FALSE	-78887	Distal mGene mQTLs
cg11795921	chr1	230136910	230136909	rs11807834:230272624:G:A	230136877	230136877	0	1.82638e-18	-0.612129	0.0609634	FALSE	-78887	Distal mGene mQTLs
cg22153407	chr1	230154343	230154342	rs11122401:230281068:G:A	230145321	230145321	0	1.66089e-16	-0.19288	0.0207593	FALSE	-87331	Distal mGene mQTLs
cg05784532	chr1	230148452	230148451	rs7551742:230290118:A:G	230154371	230154371	0	7.46122e-09	0.189159	0.0308645	FALSE	-96381	Distal mGene mQTLs
cg18187658	chr1	230158945	230158944	rs113806412:230294662:GTGTC:G	230158915	230158919	0	3.9967e-07	0.325436	0.0613609	TRUE	-100925	Distal mGene mQTLs
cg09880891	chr1	230159548	230159547	rs12065546:230295245:C:T	230159498	230159498	0	5.57103e-16	0.35135	0.038662	FALSE	-101508	Distal mGene mQTLs
cg12189363	chr1	231393338	231393337	rs480902	231395881	231395881	0	3.37072e-25	0.450461	0.0358439	FALSE	29163	Distal mGene mQTLs
cg20853591	chr1	231407733	231407732	rs2808616:231554993:C:G	231419247	231419247	0	2.65857e-09	-0.152449	0.024075	FALSE	5797	Distal mGene mQTLs
cg09186051	chr1	231846161	231846160	rs4658953:231977773:T:C	231842027	231842027	0	2.84229e-08	0.198979	0.0339605	FALSE	-215212	Distal mGene mQTLs
cg08130084	chr1	232805961	232805960	rs1845789:232944569:C:T	232808823	232808823	0	6.84021e-14	-0.226159	0.0273626	FALSE	-3931	Distal non-mGene mQTLs
cg26642082	chr1	234372602	234372601	rs73099929:234508535:C:T	234372789	234372789	0	7.9756e-09	0.251702	0.0411587	FALSE	667	Promoter mGene mQTLs
cg02985240	chr1	235304834	235304833	rs144647926:235467607:G:A	235304292	235304292	0	1.3836e-21	0.678961	0.0605316	FALSE	23927	Distal mGene mQTLs
cg19879264	chr1	235504682	235504681	rs291348:235667690:A:G	235504390	235504390	0	3.38284e-07	0.0622837	0.0116643	FALSE	91	Promoter mGene mQTLs
cg19456318	chr1	235831531	235831530	rs3820555	235831567	235831567	0	6.27193e-14	-0.329377	0.0397784	TRUE	52073	Distal mGene mQTLs
cg09632544	chr1	241848117	241848116	rs1776179:242011406:T:C	241848104	241848104	0	2.54824e-19	0.13111	0.0126494	FALSE	-137	Promoter mGene mQTLs
cg01669689	chr1	241848881	241848880	rs1776177:242012149:C:T	241848847	241848847	0	9.21049e-18	0.656002	0.0671214	FALSE	-880	Promoter mGene mQTLs
cg06376718	chr1	244461144	244461143	rs3006006:244624635:G:C	244461333	244461333	0	8.21611e-15	0.167983	0.0194637	TRUE	-6956	Distal mGene mQTLs
cg01439649	chr1	244652376	244652375	rs2653158:244815439:C:T	244652137	244652137	0	7.37837e-10	0.172341	0.0261902	FALSE	798	Promoter non-mGene mQTLs
cg14240608	chr1	244652290	244652289	rs2653158:244815439:C:T	244652137	244652137	0	7.79136e-08	0.138025	0.0244245	FALSE	798	Promoter mGene mQTLs
cg11774116	chr1	244970195	244970194	rs7545078:245133489:T:G	244970187	244970187	0	1.39907e-13	0.252363	0.0310004	TRUE	-482	Promoter non-mGene mQTLs
cg19716264	chr1	245018849	245018848	rs61844237:245133662:G:C	244970360	244970360	0	3.91256e-28	0.476795	0.034885	FALSE	-655	Promoter mGene mQTLs
cg06665322	chr1	245153480	245153479	rs72775502:245316755:C:A	245153453	245153453	0	9.36439e-19	-0.460662	0.0453809	FALSE	1532	Promoter non-mGene mQTLs
cg09692889	chr1	246190177	246190176	rs140947138:246353726:A:G	246190424	246190424	0	1.46239e-20	1.07159	0.0989233	FALSE	316888	Distal mGene mQTLs
cg22475246	chr1	246724726	246724725	rs10754532:246888053:A:G	246724751	246724751	0	4.76424e-11	0.109414	0.01542	FALSE	-704	Promoter mGene mQTLs
cg09687621	chr1	246885458	246885457	rs1039009:247080458:C:A	246917156	246917156	0	3.03107e-07	0.135951	0.0253481	TRUE	14822	Distal mGene mQTLs
cg20518750	chr1	246932182	246932181	rs61854048:247095477:T:C	246932175	246932175	0	1.43606e-21	0.203927	0.0181905	FALSE	-197	Promoter mGene mQTLs
cg04305539	chr1	247008427	247008426	rs61373194:247171390:C:G	247008088	247008088	0	1.11007e-09	0.281692	0.0433252	FALSE	5	Promoter mGene mQTLs
cg25602756	chr1	247448580	247448579	rs112008153:247611313:CT:C	247448011	247448012	1	6.41822e-10	0.944334	0.142929	TRUE	-31855	Distal mGene mQTLs
cg19023876	chr1	247448630	247448629	rs11577509:247611459:G:A	247448157	247448157	1	4.39302e-08	0.849896	0.1473	FALSE	-32001	Distal mGene mQTLs
cg25602756	chr1	247448580	247448579	rs112819557:247611514:T:C	247448212	247448212	0	4.48645e-08	1.26201	0.21889	FALSE	-32056	Distal mGene mQTLs
cg18126557	chr1	247448541	247448540	rs60418626:247611981:TC:T	247448679	247448680	0	9.52288e-16	0.716877	0.0796779	TRUE	-32523	Distal mGene mQTLs
cg15387114	chr1	247530970	247530969	rs4925558:247694370:G:C	247531068	247531068	0	4.89551e-10	0.340975	0.0512073	FALSE	-24010	Distal non-mGene mQTLs
cg06744401	chr1	247531105	247531104	rs4925558:247694370:G:C	247531068	247531068	0	5.19042e-12	0.188501	0.0251334	FALSE	-24010	Distal non-mGene mQTLs
cg00270148	chr1	247531230	247531229	rs4925558:247694370:G:C	247531068	247531068	0	1.56987e-12	0.293304	0.0380206	FALSE	-24010	Distal non-mGene mQTLs
cg12669731	chr1	248201928	248201927	rs6701018:248100333:G:A	247937031	247937031	0	6.31932e-11	-0.73406	0.104221	FALSE	482	Promoter non-mGene mQTLs
cg26787863	chr1	247934605	247934604	rs61857507:248100548:G:C	247937246	247937246	0	5.84903e-07	0.192837	0.036937	FALSE	267	Promoter non-mGene mQTLs
cg20034980	chr1	247936882	247936881	rs61857507:248100548:G:C	247937246	247937246	0	6.57869e-07	-0.237411	0.0457008	TRUE	267	Promoter non-mGene mQTLs
cg10118093	chr1	247936927	247936926	rs61857507:248100548:G:C	247937246	247937246	0	1.7799e-15	-0.666416	0.0749519	FALSE	267	Promoter non-mGene mQTLs
cg15097530	chr1	247936975	247936974	rs61857507:248100548:G:C	247937246	247937246	0	6.26288e-13	-0.385698	0.0489625	FALSE	267	Promoter non-mGene mQTLs
cg02438943	chr1	247937284	247937283	rs61857507:248100548:G:C	247937246	247937246	0	4.59859e-11	-0.967018	0.136159	FALSE	267	Promoter non-mGene mQTLs
cg00485540	chr1	247937290	247937289	rs61857507:248100548:G:C	247937246	247937246	0	1.22389e-10	-0.744579	0.107594	FALSE	267	Promoter non-mGene mQTLs
cg06853424	chr1	247937299	247937298	rs61857507:248100548:G:C	247937246	247937246	0	4.65548e-13	-0.822604	0.103736	FALSE	267	Promoter non-mGene mQTLs
cg10189817	chr1	247937313	247937312	rs61857507:248100548:G:C	247937246	247937246	0	9.9503e-12	-0.975124	0.132089	FALSE	267	Promoter non-mGene mQTLs
cg09481780	chr1	247937708	247937707	rs61857507:248100548:G:C	247937246	247937246	0	1.44209e-10	-0.529647	0.0768766	TRUE	267	Promoter non-mGene mQTLs
cg01243924	chr1	247947982	247947981	rs61857507:248100548:G:C	247937246	247937246	0	1.28093e-08	0.256378	0.0425836	FALSE	267	Promoter non-mGene mQTLs
cg00857998	chr1	248021643	248021642	rs61857507:248100548:G:C	247937246	247937246	0	2.40185e-10	0.452136	0.0665524	FALSE	267	Promoter non-mGene mQTLs
cg20414749	chr1	248028680	248028679	rs61857507:248100548:G:C	247937246	247937246	0	2.95958e-11	0.300546	0.0418395	FALSE	267	Promoter non-mGene mQTLs
cg00142815	chr1	248045434	248045433	rs61857507:248100548:G:C	247937246	247937246	0	6.21642e-11	0.364798	0.0517711	FALSE	267	Promoter non-mGene mQTLs
cg21545522	chr1	248060622	248060621	rs61857507:248100548:G:C	247937246	247937246	0	1.45626e-12	0.458825	0.0593739	FALSE	267	Promoter non-mGene mQTLs
cg02716605	chr1	248099523	248099522	rs61857507:248100548:G:C	247937246	247937246	0	2.19701e-10	0.313025	0.0459621	FALSE	267	Promoter non-mGene mQTLs
cg25181170	chr10	973222	973221	rs11253543	971385	971385	0	1.60589e-13	0.247757	0.0305248	FALSE	16956	Distal non-mGene mQTLs
cg17288694	chr10	1056776	1056775	rs11250244:1102710:C:A	1056770	1056770	0	2.75104e-14	0.245186	0.0291094	FALSE	-7232	Distal mGene mQTLs
cg27319114	chr10	3094749	3094748	rs10903953:3114654:T:C	3072462	3072462	0	1.83008e-07	0.173048	0.0316282	TRUE	-6129	Distal mGene mQTLs
cg22620285	chr10	3081296	3081295	rs12245370:3119150:A:G	3076958	3076958	0	4.13639e-10	0.304184	0.0454632	FALSE	-10625	Distal mGene mQTLs
cg12265908	chr10	3125635	3125634	rs58374102:3166746:C:T	3124554	3124554	0	1.59492e-10	0.205779	0.0299503	FALSE	-58221	Distal mGene mQTLs
cg20149431	chr10	3126494	3126493	rs78262828:3166775:C:T	3124583	3124583	0	7.53422e-10	0.243959	0.0370965	FALSE	-58250	Distal mGene mQTLs
cg18166150	chr10	3126846	3126845	rs6602031:3167983:A:G	3125791	3125791	0	2.436e-13	-0.208796	0.0259579	FALSE	-59458	Distal mGene mQTLs
cg24984350	chr10	3128109	3128108	rs7080240	3127611	3127611	0	2.28587e-19	-0.262393	0.025272	FALSE	-61278	Distal mGene mQTLs
cg22667358	chr10	3128955	3128954	rs57993510:3170288:A:AGGAC	3128096	3128096	0	3.20584e-11	-0.149587	0.020867	FALSE	-61763	Distal mGene mQTLs
cg18474443	chr10	3130288	3130287	rs4390256:3172299:T:C	3130107	3130107	0	1.23888e-12	-0.437098	0.0563526	FALSE	-63774	Distal mGene mQTLs
cg25978025	chr10	3126162	3126161	10:3176627:A:AC	3134435	3134435	0	1.3882e-09	0.268151	0.0415183	TRUE	-68102	Distal mGene mQTLs
cg17086421	chr10	3172163	3172162	rs9423712:3212795:C:G	3170603	3170603	0	1.21129e-08	0.124411	0.0206258	FALSE	2238	Promoter mGene mQTLs
cg25171089	chr10	5666863	5666862	rs3814204:5708801:T:C	5666838	5666838	0	3.02273e-11	0.218304	0.030407	FALSE	-243	Promoter mGene mQTLs
cg20290145	chr10	5684740	5684739	rs10796202:5726725:A:G	5684762	5684762	0	5.37793e-22	0.249962	0.0219838	FALSE	76	Promoter non-mGene mQTLs
cg16407947	chr10	5888581	5888580	rs6602322:5930579:G:A	5888616	5888616	0	6.71785e-28	1.03079	0.0759088	FALSE	1290	Promoter mGene mQTLs
cg00148411	chr10	5888620	5888619	rs10905405:5932475:T:C	5890512	5890512	0	1.79475e-07	-0.137847	0.0251755	TRUE	-606	Promoter mGene mQTLs
cg24348573	chr10	5978425	5978424	rs36055263:6018970:A:G	5977007	5977007	0	5.65791e-13	-0.239314	0.0303107	FALSE	1180	Promoter mGene mQTLs
cg19979643	chr10	5976648	5976647	rs8177631:6019279:C:G	5977316	5977316	0	1.14701e-17	0.359668	0.0369383	FALSE	871	Promoter mGene mQTLs
cg03555710	chr10	6178917	6178916	rs605015:6205546:T:C	6163583	6163583	0	1.73989e-09	0.172552	0.0268988	FALSE	-18649	Distal mGene mQTLs
cg07641567	chr10	6164248	6164247	rs611835:6205875:A:G	6163912	6163912	0	3.56866e-17	-0.493091	0.051642	FALSE	-18978	Distal mGene mQTLs
cg24202817	chr10	6178981	6178980	rs1887026:6205896:G:C	6163933	6163933	1	9.43785e-08	-1.18816	0.211754	TRUE	-18999	Distal mGene mQTLs
cg02628700	chr10	6179027	6179026	rs1887026:6205896:G:C	6163933	6163933	0	1.00046e-07	-0.334238	0.059698	TRUE	-18999	Distal mGene mQTLs
cg24202817	chr10	6178981	6178980	rs584797:6220496:A:G	6178533	6178533	0	3.8166e-10	-0.95964	0.1431	FALSE	-33599	Distal mGene mQTLs
cg13562929	chr10	7252310	7252309	rs12412153:7301132:G:A	7259170	7259170	0	1.35258e-13	-0.196698	0.0241449	FALSE	152316	Distal mGene mQTLs
cg24024056	chr10	7475804	7475803	rs7086022:7487591:A:G	7445629	7445629	0	3.3893e-07	0.393629	0.0737231	TRUE	26313	Distal non-mGene mQTLs
cg01382938	chr10	7667886	7667885	rs61834806:7709892:G:A	7667929	7667929	0	1.49493e-10	0.121725	0.0176853	FALSE	-931	Promoter mGene mQTLs
cg16719077	chr10	7807149	7807148	rs2802460	7787074	7787074	0	4.09781e-31	-1.2496	0.0844576	FALSE	1055	Promoter mGene mQTLs
cg10745532	chr10	7788697	7788696	rs1475406:7830319:G:C	7788356	7788356	0	5.74626e-11	0.192722	0.0272941	FALSE	-375	Promoter mGene mQTLs
cg19582388	chr10	7818444	7818443	rs78092115:7859695:C:T	7817732	7817732	0	1.52377e-19	0.250995	0.0240204	FALSE	772	Promoter mGene mQTLs
cg22279692	chr10	11046243	11046242	rs1291799	11082536	11082536	0	4.26054e-09	-0.153602	0.024617	FALSE	-284139	Distal non-mGene mQTLs
cg14629910	chr10	11149742	11149741	rs1624142	11134687	11134687	0	5.49336e-09	0.309761	0.0500465	FALSE	-336290	Distal mGene mQTLs
cg03864262	chr10	11276813	11276812	rs3814633:11318813:T:C	11276850	11276850	0	8.70272e-08	0.157369	0.0279618	TRUE	-478453	Distal mGene mQTLs
cg23960723	chr10	11741976	11741975	rs3814626:11784088:T:C	11742089	11742089	0	9.66446e-09	0.271969	0.0447533	FALSE	277	Promoter mGene mQTLs
cg06335123	chr10	12242038	12242037	rs142354895:12283965:G:GTTC	12241966	12241966	0	1.61154e-26	0.560279	0.0428958	TRUE	-46001	Distal mGene mQTLs
cg20072505	chr10	12414491	12414490	rs11374541:12472882:T:TG	12430883	12430883	0	3.73298e-07	-0.172695	0.0324711	TRUE	-81401	Distal mGene mQTLs
cg24088561	chr10	12560159	12560158	rs2815623:12600064:T:C	12558065	12558065	0	2.16294e-20	0.514846	0.0478098	FALSE	-208583	Distal mGene mQTLs
cg00115178	chr10	12606178	12606177	rs17151978:12652657:G:A	12610658	12610658	0	1.06147e-09	-0.15427	0.0236957	FALSE	-261176	Distal mGene mQTLs
cg26169081	chr10	12606340	12606339	rs17151978:12652657:G:A	12610658	12610658	0	1.26839e-08	-0.149496	0.0248227	FALSE	-261176	Distal mGene mQTLs
cg13897396	chr10	12728465	12728464	rs7077423	12729681	12729681	0	4.34419e-11	0.163014	0.0229189	FALSE	-380199	Distal mGene mQTLs
cg04836423	chr10	12730042	12730041	rs151112881:12771928:T:TCGTCC	12729929	12729929	0	8.61042e-27	0.338969	0.0257508	TRUE	-380447	Distal mGene mQTLs
cg14467781	chr10	13051280	13051279	rs553638	13051111	13051111	0	2.39415e-14	0.289678	0.0342941	FALSE	48541	Distal non-mGene mQTLs
cg04436810	chr10	12062926	12062925	rs1133847:13103707:T:C	13061707	13061707	0	2.51759e-08	0.140677	0.0239089	TRUE	37945	Distal non-mGene mQTLs
cg14458563	chr10	13074698	13074697	rs4750308:13116699:C:A	13074699	13074699	0	7.29361e-22	-0.407734	0.0360165	FALSE	24953	Distal mGene mQTLs
cg19018267	chr10	13299333	13299332	rs1058596:13341579:G:C	13299579	13299579	0	5.25675e-22	0.450923	0.0396451	FALSE	2833	Distal mGene mQTLs
cg24686497	chr10	13439945	13439944	rs1890876:13482731:G:A	13440731	13440731	0	8.32752e-13	0.335675	0.0428869	FALSE	88243	Distal mGene mQTLs
cg02148923	chr10	13440382	13440381	rs1890876:13482731:G:A	13440731	13440731	0	1.30656e-10	0.395788	0.0572938	FALSE	88243	Distal mGene mQTLs
cg15642182	chr10	13831972	13831971	rs10906502:13869900:T:C	13827900	13827900	0	5.54387e-14	0.180754	0.0217731	FALSE	634242	Distal mGene mQTLs
cg22459591	chr10	13822670	13822669	rs35437246:14011750:G:GT	13969750	13969750	0	1.152e-09	-0.155766	0.0239837	TRUE	492392	Distal mGene mQTLs
cg21371809	chr10	14010030	14010029	rs7894851:14049664:T:C	14007665	14007665	0	1.43387e-10	-0.813865	0.118112	FALSE	454477	Distal mGene mQTLs
cg27572370	chr10	13960395	13960394	rs56267292:14051311:GT:G	14009312	14009313	0	1.34651e-07	-0.159572	0.0288227	TRUE	452830	Distal mGene mQTLs
cg08631528	chr10	14009447	14009446	rs10691331:14051813:C:CAG	14009814	14009814	0	5.72415e-13	-0.201077	0.0254744	TRUE	452328	Distal mGene mQTLs
cg26984593	chr10	14009638	14009637	rs10691331:14051813:C:CAG	14009814	14009814	0	1.65769e-10	-0.1405	0.0204708	FALSE	452328	Distal mGene mQTLs
cg08734931	chr10	14009651	14009650	rs10691331:14051813:C:CAG	14009814	14009814	0	1.48041e-13	-0.299327	0.036814	FALSE	452328	Distal mGene mQTLs
cg02284273	chr10	14009681	14009680	rs10691331:14051813:C:CAG	14009814	14009814	0	4.69432e-11	-0.217068	0.0305801	FALSE	452328	Distal mGene mQTLs
cg03179435	chr10	14009823	14009822	rs10691331:14051813:C:CAG	14009814	14009814	0	5.11349e-19	-0.320622	0.0312786	FALSE	452328	Distal mGene mQTLs
cg19998150	chr10	14009840	14009839	rs10691331:14051813:C:CAG	14009814	14009814	0	1.081e-22	-0.39658	0.0340971	FALSE	452328	Distal mGene mQTLs
cg04004904	chr10	15096607	15096606	rs3814173:15139081:C:A	15097082	15097082	0	3.09152e-07	0.26622	0.0496761	TRUE	237	Promoter mGene mQTLs
cg23933602	chr10	16817646	16817645	rs811912:16859618:G:C	16817619	16817619	0	6.87471e-38	0.61635	0.0353587	FALSE	-91	Promoter mGene mQTLs
cg17723355	chr10	17643700	17643699	rs2243617:17685727:A:G	17643728	17643728	0	1.03231e-08	0.16952	0.0279558	FALSE	397	Promoter mGene mQTLs
cg07544152	chr10	17953224	17953223	rs28482234:18239863:C:G	17950934	17950934	0	2.16181e-16	0.251927	0.0272442	FALSE	905	Promoter mGene mQTLs
cg03634479	chr10	18141484	18141483	rs12572321:18430220:G:A	18141291	18141291	0	1.73177e-08	0.12806	0.0214874	FALSE	-614	Promoter mGene mQTLs
cg02635932	chr10	18260850	18260849	rs73601575:18570293:T:C	18281364	18281364	0	2.26917e-08	0.157305	0.0266393	FALSE	-140687	Distal mGene mQTLs
cg07372450	chr10	18390501	18390500	rs10828424:18579737:A:G	18290808	18290808	0	1.89908e-07	-0.133719	0.0244753	FALSE	-150131	Distal mGene mQTLs
cg14024017	chr10	19929597	19929596	rs16919374:20113015:C:T	19824086	19824086	0	3.48353e-16	0.234731	0.0256065	FALSE	-7847	Distal mGene mQTLs
cg12723985	chr10	19966980	19966979	rs16919374:20113015:C:T	19824086	19824086	0	5.31239e-15	0.216541	0.0248751	FALSE	-7847	Distal mGene mQTLs
cg03898108	chr10	19826842	19826841	rs7908024:20113614:A:T	19824685	19824685	0	6.10107e-14	0.193844	0.0233967	FALSE	-8446	Distal mGene mQTLs
cg07534516	chr10	19815196	19815195	rs2478143	19832948	19832948	0	1.0096e-26	-0.322609	0.0245564	FALSE	-16709	Distal mGene mQTLs
cg27401333	chr10	19922630	19922629	rs2481935:20123335:A:G	19834406	19834406	0	4.62746e-18	-0.299429	0.030284	FALSE	-18167	Distal mGene mQTLs
cg03631457	chr10	19941809	19941808	rs2481935:20123335:A:G	19834406	19834406	0	3.69013e-11	-0.18498	0.0258977	FALSE	-18167	Distal mGene mQTLs
cg05933215	chr10	20855537	20855536	rs67288319:21177156:GA:G	20888227	20888228	0	1.02263e-10	0.237746	0.0341892	TRUE	285960	Distal mGene mQTLs
cg12491257	chr10	22621086	22621085	rs1778307:22912102:A:T	22623173	22623173	0	2.87838e-07	-0.176308	0.0328047	TRUE	91382	Distal mGene mQTLs
cg20715589	chr10	25016410	25016409	rs2291583	25016442	25016442	0	6.95313e-32	0.687328	0.0455496	FALSE	45837	Distal mGene mQTLs
cg03836484	chr10	25060254	25060253	rs199783584:25347859:TAA:T	25058930	25058932	0	1.16996e-13	-0.316223	0.0386966	TRUE	3349	Distal mGene mQTLs
cg24031395	chr10	27760231	27760230	rs11015964:28004725:G:A	27715796	27715796	0	4.86749e-15	-0.381433	0.043742	FALSE	30264	Distal non-mGene mQTLs
cg27303223	chr10	27746894	27746893	rs1994656:28035796:T:C	27746867	27746867	0	7.37669e-09	0.31139	0.0507898	FALSE	-807	Promoter mGene mQTLs
cg27177870	chr10	28326744	28326743	rs1148182:28616419:G:A	28327490	28327490	0	9.16702e-24	0.441746	0.0367164	FALSE	6996	Distal non-mGene mQTLs
cg04045419	chr10	28534163	28534162	rs35712225:28864711:G:T	28575782	28575782	0	3.13337e-23	0.182245	0.0154029	FALSE	-43289	Distal mGene mQTLs
cg04192862	chr10	28677544	28677543	rs59827158:28968461:T:TA	28679532	28679532	0	2.48693e-12	0.219507	0.0287607	TRUE	-2190	Promoter mGene mQTLs
cg02882375	chr10	29408977	29408976	rs72517574:29720808:C:CTA	29431879	29431879	0	1.56121e-18	1.00421	0.0997546	TRUE	-22477	Distal non-mGene mQTLs
cg22550296	chr10	29719526	29719525	rs7077132:30007597:A:G	29718668	29718668	0	1.5933e-07	0.38613	0.0701963	FALSE	18113	Distal mGene mQTLs
cg04194651	chr10	29737148	29737147	rs7092261:30026099:G:T	29737170	29737170	0	3.37449e-14	0.140016	0.0166931	FALSE	-389	Promoter mGene mQTLs
cg01917980	chr10	31031268	31031267	rs1690625:31295821:C:G	31006892	31006892	0	5.90932e-15	-0.19737	0.0227203	FALSE	25045	Distal mGene mQTLs
cg00520933	chr10	31318232	31318231	rs7095938:31632518:G:C	31343589	31343589	0	1.46899e-06	-0.202493	0.0403651	TRUE	-25094	Distal mGene mQTLs
cg18675610	chr10	31927384	31927383	rs144466157:32216157:A:AATTTTAAAACAAAG	31927229	31927229	0	7.09967e-23	0.58373	0.0498951	FALSE	1647	Promoter mGene mQTLs
cg15748490	chr10	32265920	32265919	rs2806144:32554586:C:T	32265658	32265658	0	1.06593e-19	0.773421	0.0736044	TRUE	631	Promoter non-mGene mQTLs
cg18270830	chr10	32346030	32346029	rs113992440:32586720:G:GATT	32297792	32297792	0	5.92437e-15	0.176582	0.0203284	TRUE	81006	Distal mGene mQTLs
cg09075096	chr10	32352606	32352605	rs1475436	32321775	32321775	0	3.92688e-07	0.107185	0.0201952	TRUE	57023	Distal mGene mQTLs
cg01217608	chr10	35267484	35267483	rs71033392:35624849:CA:C	35335921	35335922	0	2.2266e-07	0.126258	0.0232541	TRUE	-88896	Distal mGene mQTLs
cg23042076	chr10	43075722	43075721	rs2435357:43582056:T:C	43086608	43086608	0	2.6449e-11	0.140649	0.0195239	FALSE	-9581	Distal mGene mQTLs
cg01289552	chr10	43076203	43076202	rs2506004:43582273:A:C	43086825	43086825	0	2.57763e-12	0.203411	0.0266742	FALSE	-9798	Distal mGene mQTLs
cg12608775	chr10	43455376	43455375	rs200546413:43886739:T:TC	43391291	43391291	0	6.80349e-14	0.427315	0.0516943	FALSE	17875	Distal non-mGene mQTLs
cg05101083	chr10	43409493	43409492	rs7092125:43887423:G:A	43391975	43391975	0	1.23689e-13	-0.174507	0.0213801	FALSE	17191	Distal mGene mQTLs
cg17797973	chr10	43667334	43667333	rs3128252:44167701:C:T	43672253	43672253	0	1.56125e-09	0.154659	0.0240308	FALSE	-43436	Distal non-mGene mQTLs
cg16120811	chr10	44865334	44865333	rs10751359:45360594:G:C	44865146	44865146	0	2.08947e-07	-0.120902	0.0222121	FALSE	94543	Distal non-mGene mQTLs
cg02683324	chr10	44879394	44879393	rs3740086	44879848	44879848	0	1.62968e-14	0.214648	0.0252139	FALSE	79841	Distal non-mGene mQTLs
cg18881489	chr10	44879869	44879868	rs3740086	44879848	44879848	0	1.28628e-24	0.284837	0.0230639	FALSE	79841	Distal mGene mQTLs
cg21121209	chr10	44865433	44865432	rs10736832:45454640:A:G	44959192	44959192	0	2.42213e-08	0.155869	0.0264555	FALSE	215	Promoter non-mGene mQTLs
cg20948262	chr10	44865522	44865521	rs11389811:45456343:A:AT	44960895	44960895	0	5.71815e-08	0.134718	0.0235711	TRUE	-1488	Promoter non-mGene mQTLs
cg19109608	chr10	47554165	47554164	rs143273522:49461502:T:A	48253459	48253459	0	1.45614e-06	0.356061	0.0709494	TRUE	21411	Distal non-mGene mQTLs
cg05453333	chr10	48523332	48523331	rs10857592:49732975:G:C	48524930	48524930	0	7.78378e-09	0.10954	0.017898	FALSE	131335	Distal mGene mQTLs
cg18875351	chr10	48604642	48604641	rs17010948:49812917:T:C	48604872	48604872	0	2.34798e-27	-0.40502	0.0302816	FALSE	51393	Distal mGene mQTLs
cg27657429	chr10	48604823	48604822	rs17010948:49812917:T:C	48604872	48604872	0	3.57314e-12	-0.598778	0.0791279	TRUE	51393	Distal mGene mQTLs
cg22871947	chr10	49298831	49298830	rs7900404	49300183	49300183	0	1.35317e-08	-0.172155	0.0286469	FALSE	-990	Promoter mGene mQTLs
cg11410305	chr10	49300669	49300668	rs7900404	49300183	49300183	0	2.0563e-08	0.21671	0.0365755	FALSE	-990	Promoter mGene mQTLs
cg11637084	chr10	50410670	50410669	rs7392702:52177315:A:G	50417555	50417555	0	1.56282e-34	-1.5634	0.0970409	FALSE	207608	Distal mGene mQTLs
cg24037270	chr10	50307108	50307107	rs10508930:52338100:A:G	50578340	50578340	0	4.04621e-14	-0.426365	0.0510235	FALSE	46823	Distal mGene mQTLs
cg00453368	chr10	50361419	50361418	rs10508930:52338100:A:G	50578340	50578340	0	4.20901e-11	-0.279698	0.0392918	FALSE	46823	Distal mGene mQTLs
cg00168459	chr10	50374956	50374955	rs10508930:52338100:A:G	50578340	50578340	0	1.00792e-11	-0.304069	0.0412019	FALSE	46823	Distal mGene mQTLs
cg10188795	chr10	50398485	50398484	rs10508930:52338100:A:G	50578340	50578340	0	1.45837e-10	-0.339756	0.0493295	FALSE	46823	Distal mGene mQTLs
cg08363235	chr10	50417072	50417071	rs10508930:52338100:A:G	50578340	50578340	0	4.25806e-16	-0.49087	0.0537468	FALSE	46823	Distal mGene mQTLs
cg08557120	chr10	50470107	50470106	rs10508930:52338100:A:G	50578340	50578340	0	1.67978e-07	-0.211672	0.0385593	TRUE	46823	Distal mGene mQTLs
cg22388374	chr10	50496818	50496817	rs10508930:52338100:A:G	50578340	50578340	0	5.43273e-19	-0.35993	0.0351474	TRUE	46823	Distal mGene mQTLs
cg14611218	chr10	50503756	50503755	rs10508930:52338100:A:G	50578340	50578340	0	1.30401e-33	-0.970088	0.0615787	FALSE	46823	Distal mGene mQTLs
cg03585110	chr10	50504013	50504012	rs10508930:52338100:A:G	50578340	50578340	0	4.29397e-27	-0.94771	0.0713813	FALSE	46823	Distal mGene mQTLs
cg15678767	chr10	50527564	50527563	rs10508930:52338100:A:G	50578340	50578340	0	6.38668e-17	-0.475758	0.0503384	FALSE	46823	Distal mGene mQTLs
cg07494431	chr10	50527581	50527580	rs10508930:52338100:A:G	50578340	50578340	0	1.77225e-24	-0.698406	0.0567906	FALSE	46823	Distal mGene mQTLs
cg13784163	chr10	50545717	50545716	rs10508930:52338100:A:G	50578340	50578340	0	3.64729e-20	-0.522077	0.0488688	FALSE	46823	Distal mGene mQTLs
cg17569303	chr10	50551192	50551191	rs10508930:52338100:A:G	50578340	50578340	0	5.66355e-18	-1.50533	0.152764	FALSE	46823	Distal mGene mQTLs
cg11764846	chr10	50553743	50553742	rs10508930:52338100:A:G	50578340	50578340	0	9.73683e-19	-0.581655	0.0573366	FALSE	46823	Distal mGene mQTLs
cg05102856	chr10	50565848	50565847	rs10508930:52338100:A:G	50578340	50578340	0	4.12796e-09	-0.251945	0.0403377	TRUE	46823	Distal mGene mQTLs
cg13382516	chr10	50576594	50576593	rs10508930:52338100:A:G	50578340	50578340	0	5.592e-18	-0.40139	0.0407253	FALSE	46823	Distal mGene mQTLs
cg20014988	chr10	50603373	50603372	rs10508930:52338100:A:G	50578340	50578340	0	2.87089e-13	-0.289239	0.036088	FALSE	46823	Distal mGene mQTLs
cg17673495	chr10	50619287	50619286	rs10508930:52338100:A:G	50578340	50578340	0	1.82953e-10	-0.196745	0.0287432	FALSE	46823	Distal mGene mQTLs
cg04717834	chr10	50993506	50993505	rs2248908:52750665:C:T	50990905	50990905	0	2.41906e-12	0.188352	0.0246627	FALSE	453	Promoter mGene mQTLs
cg18694763	chr10	54802399	54802398	rs7922254:56562037:T:A	54802277	54802277	0	1.65504e-12	-0.29611	0.0384313	FALSE	825665	Distal mGene mQTLs
cg01021053	chr10	56361247	56361246	exm826064	56361273	56361273	0	5.59885e-08	0.257381	0.0449985	FALSE	2	Promoter mGene mQTLs
cg13875194	chr10	58511963	58511962	rs7069916	58512064	58512064	0	5.53664e-12	0.14339	0.0191484	FALSE	1076	Promoter mGene mQTLs
cg10845249	chr10	59710223	59710222	rs77809752:61469938:A:C	59710180	59710180	0	1.27643e-07	0.302545	0.0545362	TRUE	25822	Distal mGene mQTLs
cg14316118	chr10	59908427	59908426	rs11819256:61663106:T:C	59903348	59903348	0	1.18073e-27	0.476531	0.035332	FALSE	3308	Distal mGene mQTLs
cg26202427	chr10	60042897	60042896	rs10761442:61795868:T:C	60036110	60036110	0	2.35773e-08	-0.198482	0.0336568	FALSE	697380	Distal mGene mQTLs
cg14090951	chr10	60123560	60123559	rs10761460:61883301:T:C	60123543	60123543	0	4.09563e-08	-0.168739	0.0291721	FALSE	609947	Distal mGene mQTLs
cg07064056	chr10	60353968	60353967	rs10821738:62109449:G:A	60349691	60349691	0	3.63901e-15	-0.29577	0.0337265	FALSE	383799	Distal mGene mQTLs
cg06706483	chr10	60883050	60883049	rs3049417:62640773:CCCA:C	60881015	60881018	0	1.1047e-06	0.115066	0.0226496	TRUE	120425	Distal mGene mQTLs
cg24836845	chr10	60944873	60944872	rs7079357:62643168:T:A	60883410	60883410	0	1.87504e-11	0.246986	0.0339877	FALSE	118030	Distal mGene mQTLs
cg04438074	chr10	61662782	61662781	rs71490861:63422876:A:G	61663118	61663118	0	2.37679e-10	-0.214339	0.0315405	FALSE	-157	Promoter mGene mQTLs
cg20728881	chr10	62048556	62048555	rs7902719:63808666:C:A	62048907	62048907	0	3.57895e-08	0.115703	0.0199077	FALSE	-147607	Distal mGene mQTLs
cg10134489	chr10	62269376	62269375	rs1864836:64028538:C:G	62268779	62268779	0	6.13139e-11	-0.145916	0.0207005	FALSE	-72	Promoter mGene mQTLs
cg01631684	chr10	63521202	63521201	rs12245149:65321147:C:A	63561387	63561387	0	1.25236e-06	-0.0699554	0.0138463	FALSE	-40024	Distal mGene mQTLs
cg08848649	chr10	66235038	66235037	rs6480151:67994452:A:T	66234694	66234694	0	8.43998e-08	0.155596	0.0276153	TRUE	1461475	Distal mGene mQTLs
cg09641919	chr10	68331859	68331858	rs2295972:70092052:G:C	68332295	68332295	0	8.85149e-10	0.240325	0.0367166	FALSE	-1121	Promoter mGene mQTLs
cg15420141	chr10	68331861	68331860	rs2295972:70092052:G:C	68332295	68332295	0	5.92154e-09	0.219265	0.0355108	FALSE	-1121	Promoter mGene mQTLs
cg07328400	chr10	68404053	68404052	rs71273639:70162642:T:TCCCAGAC	68402885	68402885	0	3.69176e-07	0.159781	0.0300295	TRUE	4409	Distal mGene mQTLs
cg09535179	chr10	67667021	67667020	rs192015602:70231513:G:T	68471756	68471756	0	1.53372e-07	0.452005	0.0820516	TRUE	365	Promoter non-mGene mQTLs
cg11178592	chr10	69383549	69383548	rs4745984:71143488:C:A	69383732	69383732	0	2.76914e-13	0.234596	0.0292472	FALSE	-113748	Distal mGene mQTLs
cg25325125	chr10	69457889	69457888	rs58472557:71218012:C:CAGG	69458256	69458256	0	1.83569e-09	-0.164915	0.0257501	TRUE	-6783	Distal mGene mQTLs
cg18840567	chr10	70147000	70146999	rs201670247:71906917:TA:T	70147161	70147162	0	1.35729e-13	0.865737	0.106278	TRUE	-485	Promoter mGene mQTLs
cg26971530	chr10	70671987	70671986	rs58369702:72433039:C:G	70673283	70673283	0	3.228e-07	0.127101	0.0237581	TRUE	-480	Promoter mGene mQTLs
cg18679544	chr10	70672727	70672726	rs11596281	70673381	70673381	0	2.02842e-08	0.113794	0.0191967	FALSE	-578	Promoter mGene mQTLs
cg18968090	chr10	70672706	70672705	rs34821335:72433203:GA:G	70673447	70673448	0	1.36551e-17	0.545404	0.0561807	FALSE	-644	Promoter mGene mQTLs
cg07409741	chr10	70888340	70888339	rs2854613:72648084:C:T	70888327	70888327	0	2.20643e-19	0.292115	0.0281189	TRUE	457	Promoter mGene mQTLs
cg21324555	chr10	70888923	70888922	rs2630336:72648422:G:T	70888665	70888665	0	1.32817e-17	-0.403804	0.0415751	FALSE	119	Promoter mGene mQTLs
cg19225512	chr10	70888937	70888936	rs2630336:72648422:G:T	70888665	70888665	0	5.31286e-14	-0.28534	0.0343408	FALSE	119	Promoter mGene mQTLs
cg27334542	chr10	71845765	71845764	rs3061818:73598192:C:CAT	71838435	71838435	0	1.52754e-23	0.446141	0.0373388	TRUE	12940	Distal mGene mQTLs
cg02442305	chr10	72215529	72215528	exm2217433	72215835	72215835	0	8.52013e-07	-0.44173	0.0859744	TRUE	1299	Promoter mGene mQTLs
cg08695113	chr10	73082668	73082667	rs112803980:74842608:T:TC	73082850	73082850	0	1.30392e-14	-0.412971	0.0482928	TRUE	14124	Distal mGene mQTLs
cg23916516	chr10	73773382	73773381	rs28553894:75489843:C:A	73730085	73730085	0	1.06603e-15	-0.274704	0.0305972	FALSE	381	Promoter non-mGene mQTLs
cg10505247	chr10	73773593	73773592	rs28553894:75489843:C:A	73730085	73730085	0	1.10206e-17	-0.436064	0.0447538	FALSE	381	Promoter non-mGene mQTLs
cg02152968	chr10	73773674	73773673	rs28553894:75489843:C:A	73730085	73730085	0	2.07932e-14	-0.433713	0.0511987	FALSE	381	Promoter non-mGene mQTLs
cg04070685	chr10	73774803	73774802	rs11000773	73774357	73774357	0	3.59466e-07	-0.184177	0.0345769	FALSE	-2066	Promoter mGene mQTLs
cg07177559	chr10	75188199	75188198	rs7089501:76898688:T:G	75138930	75138930	0	8.22576e-15	-0.260992	0.0302411	FALSE	-39344	Distal non-mGene mQTLs
cg10955410	chr10	75295325	75295324	rs80070156:77055114:A:G	75295356	75295356	0	7.50017e-22	0.308794	0.0272877	FALSE	-25537	Distal non-mGene mQTLs
cg24550112	chr10	75431305	75431304	rs55922628:77191441:C:A	75431683	75431683	0	6.7826e-11	0.175566	0.0249731	FALSE	-230	Promoter non-mGene mQTLs
cg09581513	chr10	75431320	75431319	rs55922628:77191441:C:A	75431683	75431683	0	1.33214e-14	0.113041	0.0132247	TRUE	-230	Promoter mGene mQTLs
cg17715668	chr10	75431903	75431902	rs55922628:77191441:C:A	75431683	75431683	0	1.68784e-15	0.18737	0.0210522	TRUE	-230	Promoter mGene mQTLs
cg11916209	chr10	75712390	75712389	rs1909691:77472128:C:A	75712370	75712370	0	5.51293e-15	0.367392	0.0422348	FALSE	-280917	Distal non-mGene mQTLs
cg04448240	chr10	75712401	75712400	rs1909691:77472128:C:A	75712370	75712370	0	3.50384e-17	0.280318	0.0293486	FALSE	-280917	Distal non-mGene mQTLs
cg20227530	chr10	77325381	77325380	rs10762760:79201542:C:T	77441784	77441784	0	6.42168e-07	-0.130832	0.0251589	TRUE	196811	Distal mGene mQTLs
cg23097750	chr10	77378175	77378174	rs10762760:79201542:C:T	77441784	77441784	0	9.57352e-08	-0.120409	0.0214707	FALSE	196811	Distal mGene mQTLs
cg25153204	chr10	77531489	77531488	rs10762760:79201542:C:T	77441784	77441784	0	3.52252e-15	-0.334804	0.0381535	FALSE	196811	Distal mGene mQTLs
cg13155609	chr10	78212633	78212632	rs1149740:79972524:G:A	78212767	78212767	0	2.76094e-08	-0.0982728	0.0167556	TRUE	-33593	Distal non-mGene mQTLs
cg03347444	chr10	77711010	77711009	rs115321474:79975374:C:T	78215617	78215617	0	7.4854e-07	0.33601	0.0650362	TRUE	-36443	Distal non-mGene mQTLs
cg08058898	chr10	79112510	79112509	rs1765880:80873242:C:T	79113485	79113485	0	8.21866e-08	0.147669	0.0261827	FALSE	-44450	Distal mGene mQTLs
cg23346408	chr10	79242201	79242200	rs180964234:81016281:G:A	79256524	79256524	0	2.48327e-07	-0.308207	0.0570102	TRUE	-187489	Distal mGene mQTLs
cg05948642	chr10	80454289	80454288	rs10887914:82215288:T:C	80455532	80455532	0	2.47748e-33	0.316262	0.0202136	FALSE	-1366	Promoter mGene mQTLs
cg03262869	chr10	84202600	84202599	rs4933971:85945289:C:G	84185533	84185533	0	7.801e-08	-0.0876548	0.0155118	TRUE	-11795	Distal non-mGene mQTLs
cg24540756	chr10	84193836	84193835	rs7916271:85954220:C:T	84194464	84194464	0	1.51465e-07	0.151868	0.027555	TRUE	171	Promoter mGene mQTLs
cg22638834	chr10	84194487	84194486	rs7916271:85954220:C:T	84194464	84194464	0	5.05765e-10	0.160047	0.0240582	FALSE	171	Promoter mGene mQTLs
cg12208770	chr10	84245133	84245132	rs11200929:85987376:G:A	84227620	84227620	0	9.20674e-10	1.11122	0.169967	TRUE	-2031	Promoter non-mGene mQTLs
cg19009870	chr10	84214263	84214262	rs7909901:85991083:A:G	84231327	84231327	0	6.94551e-09	-0.164997	0.0268596	FALSE	-36692	Distal non-mGene mQTLs
cg05375443	chr10	84237671	84237670	rs10887259:85997250:G:A	84237494	84237494	0	2.0235e-11	-0.181033	0.0249597	FALSE	3967	Distal mGene mQTLs
cg09035552	chr10	84241486	84241485	rs4933989:85999444:T:C	84239688	84239688	0	1.48477e-16	0.353757	0.0379974	FALSE	1773	Promoter mGene mQTLs
cg15780078	chr10	84244640	84244639	rs10736319:86004238:T:C	84244482	84244482	0	1.59612e-07	-0.111927	0.0203492	TRUE	571	Promoter mGene mQTLs
cg06705986	chr10	84245133	84245132	rs2279227:86004873:T:C	84245117	84245117	1	8.77284e-08	-0.597008	0.10611	FALSE	-64	Promoter mGene mQTLs
cg13133883	chr10	84244905	84244904	rs6585849:86006013:A:G	84246257	84246257	0	2.04616e-09	-0.155324	0.0243328	TRUE	-1204	Promoter mGene mQTLs
cg00415971	chr10	84245006	84245005	rs6585849:86006013:A:G	84246257	84246257	0	4.09597e-08	-0.153441	0.0265274	TRUE	-1204	Promoter mGene mQTLs
cg06201640	chr10	85995902	85995901	rs55775836:87755690:T:C	85995933	85995933	0	9.24846e-10	-0.220073	0.0336659	FALSE	370560	Distal mGene mQTLs
cg11366775	chr10	86672554	86672553	rs4278432:88434193:A:G	86674436	86674436	0	3.63473e-09	-0.212244	0.0338457	FALSE	-5987	Distal mGene mQTLs
cg12191938	chr10	86971190	86971189	rs2279601:88730177:A:G	86970420	86970420	0	1.71037e-09	0.276808	0.0431287	FALSE	321	Promoter mGene mQTLs
cg15575238	chr10	87659044	87659043	rs58469138:89419109:AG:A	87659352	87659353	0	1.00245e-30	-0.424591	0.028987	TRUE	261	Promoter mGene mQTLs
cg01868499	chr10	87659463	87659462	rs58469138:89419109:AG:A	87659352	87659353	0	2.98952e-10	-0.154698	0.0229102	TRUE	261	Promoter mGene mQTLs
cg17916473	chr10	87659617	87659616	rs58469138:89419109:AG:A	87659352	87659353	0	7.98706e-13	-0.167667	0.0214014	FALSE	261	Promoter mGene mQTLs
cg01547338	chr10	87659624	87659623	rs58469138:89419109:AG:A	87659352	87659353	0	2.06717e-14	-0.207083	0.0244427	TRUE	261	Promoter mGene mQTLs
cg05628107	chr10	87659628	87659627	rs58469138:89419109:AG:A	87659352	87659353	0	8.58624e-16	-0.244625	0.0271362	TRUE	261	Promoter mGene mQTLs
cg24500487	chr10	87661038	87661037	rs1555434:89419143:G:C	87659386	87659386	0	1.84196e-07	-0.103066	0.0188422	FALSE	227	Promoter mGene mQTLs
cg07153053	chr10	89224916	89224915	rs2297475:90984623:A:G	89224866	89224866	0	3.46824e-10	0.215339	0.0320245	FALSE	189691	Distal mGene mQTLs
cg17741809	chr10	89225299	89225298	rs2297475:90984623:A:G	89224866	89224866	0	1.37341e-25	1.11818	0.0879551	FALSE	189691	Distal mGene mQTLs
cg09060654	chr10	89225306	89225305	rs2297475:90984623:A:G	89224866	89224866	0	1.59052e-22	0.786031	0.0679476	FALSE	189691	Distal mGene mQTLs
cg27135915	chr10	89368973	89368972	rs12766862:91092648:G:C	89332891	89332891	0	2.55464e-09	-0.270932	0.0427335	FALSE	-4997	Distal non-mGene mQTLs
cg05552874	chr10	89393387	89393386	rs74945792:91152321:C:CTTA	89392564	89392564	0	6.59746e-30	0.678665	0.0473365	FALSE	-18	Promoter mGene mQTLs
cg15019617	chr10	89392691	89392690	rs303216:91155186:C:T	89395429	89395429	0	2.38938e-25	0.494121	0.039144	FALSE	-2883	Distal mGene mQTLs
cg24165102	chr10	91856936	91856935	rs34491076:93561237:C:CT	91801480	91801480	0	3.5185e-12	0.301374	0.0398117	TRUE	-3168	Distal mGene mQTLs
cg02407266	chr10	93080894	93080893	rs66527842:94749455:C:A	92989698	92989698	0	5.85847e-09	0.141222	0.0228637	FALSE	-154985	Distal non-mGene mQTLs
cg13462158	chr10	93060480	93060479	rs68040629:94831523:C:G	93071766	93071766	0	2.59775e-07	0.0851282	0.0157747	FALSE	206	Promoter non-mGene mQTLs
cg13228314	chr10	93600454	93600453	rs57029781:95360411:G:A	93600654	93600654	0	3.01612e-08	-0.304231	0.0520319	FALSE	1090	Promoter mGene mQTLs
cg12765123	chr10	94363416	94363415	rs12781451:96083920:G:A	94324163	94324163	0	1.28267e-11	-0.294166	0.0400981	FALSE	-293351	Distal non-mGene mQTLs
cg16680547	chr10	96133959	96133958	rs149224397:97051005:GCCTC:G	95291248	95291252	0	2.05466e-09	0.758537	0.118846	TRUE	-224	Promoter non-mGene mQTLs
cg06344285	chr10	96587469	96587468	rs4597007:98347257:T:G	96587500	96587500	0	9.65169e-16	0.216095	0.0240242	FALSE	-48	Promoter mGene mQTLs
cg21264903	chr10	96700902	96700901	rs4919052:98442390:C:T	96682633	96682633	0	4.35201e-14	-0.364997	0.0437455	TRUE	37881	Distal mGene mQTLs
cg02238449	chr10	97056086	97056085	rs7075194:98796473:G:A	97036716	97036716	0	2.99338e-09	0.198477	0.0314593	TRUE	149204	Distal mGene mQTLs
cg06040071	chr10	97533410	97533409	rs12779451:99293327:G:A	97533570	97533570	0	1.23272e-14	0.17487	0.0204263	FALSE	-34702	Distal mGene mQTLs
cg27015047	chr10	97571858	97571857	rs10882957:99299542:T:A	97539785	97539785	0	1.75293e-11	-0.225269	0.0309468	FALSE	-40917	Distal non-mGene mQTLs
cg07066120	chr10	97571576	97571575	rs12783481:99305631:T:C	97545874	97545874	0	1.858e-19	0.362423	0.0347924	FALSE	-47006	Distal non-mGene mQTLs
cg02950892	chr10	97571588	97571587	rs3814554:99331201:C:T	97571444	97571444	0	1.13661e-19	0.393812	0.0375156	FALSE	1055	Promoter mGene mQTLs
cg23423227	chr10	97634130	97634129	rs5787251:99407672:C:CT	97647915	97647915	0	5.69008e-08	0.126877	0.0221951	TRUE	-63541	Distal non-mGene mQTLs
cg07329397	chr10	97737503	97737502	rs10786368:99496361:C:T	97736604	97736604	0	6.75603e-08	-0.0759607	0.0133715	FALSE	517	Promoter mGene mQTLs
cg16035534	chr10	97743322	97743321	rs4917783:99497224:C:G	97737467	97737467	0	3.84383e-10	-0.0963276	0.0143671	FALSE	-346	Promoter mGene mQTLs
cg08489478	chr10	97740463	97740462	rs10786370:99499822:G:A	97740065	97740065	0	6.77924e-27	-0.440942	0.0333987	FALSE	-2944	Distal mGene mQTLs
cg25303761	chr10	98135383	98135382	rs147614083:99895140:G:A	98135383	98135383	0	6.1063e-09	-0.5201	0.0843155	TRUE	-759	Promoter non-mGene mQTLs
cg26954736	chr10	99930912	99930911	rs11421662:101763834:C:CA	100004077	100004077	0	6.36696e-08	-0.101155	0.0177679	TRUE	5842	Distal non-mGene mQTLs
cg19212550	chr10	100008152	100008151	rs7078766	100005136	100005136	0	4.52779e-09	-0.279511	0.0448822	FALSE	4783	Distal mGene mQTLs
cg18485039	chr10	100346490	100346489	rs2275657:102106298:G:C	100346541	100346541	0	2.35937e-08	0.136581	0.0231608	FALSE	583	Promoter mGene mQTLs
cg05232215	chr10	100729588	100729587	rs12268880:102495285:G:C	100735528	100735528	0	8.41355e-08	0.108239	0.0192082	FALSE	75	Promoter non-mGene mQTLs
cg26391777	chr10	100912464	100912463	rs62621207:102672248:A:T	100912491	100912491	0	1.61441e-09	0.273308	0.0425092	FALSE	78	Promoter non-mGene mQTLs
cg05630272	chr10	101776946	101776945	rs117217752:103218365:C:T	101458608	101458608	0	4.1442e-08	0.421413	0.0728856	TRUE	-104575	Distal non-mGene mQTLs
cg06623385	chr10	101782995	101782994	rs2735421:103541016:T:G	101781259	101781259	0	3.19582e-07	-0.138361	0.0258523	TRUE	2154	Promoter mGene mQTLs
cg15320455	chr10	102120373	102120372	rs61874768:103880118:G:T	102120361	102120361	0	6.89178e-13	0.234751	0.0298647	FALSE	92	Promoter mGene mQTLs
cg10523032	chr10	102393104	102393103	rs3833904:104154325:CG:C	102394568	102394569	0	9.26451e-14	0.271868	0.0331041	TRUE	-458	Promoter mGene mQTLs
cg10872209	chr10	102715552	102715551	rs10786705	102717948	102717948	0	1.36865e-17	-0.298952	0.0307955	FALSE	-3410	Distal mGene mQTLs
cg18151487	chr10	102715584	102715583	rs10786705	102717948	102717948	0	2.47825e-23	-0.248604	0.020944	FALSE	-3410	Distal mGene mQTLs
cg07939845	chr10	102870113	102870112	rs7896519:104866863:C:T	103107106	103107106	0	3.61683e-13	0.241702	0.0303105	FALSE	86200	Distal non-mGene mQTLs
cg08815479	chr10	103494194	103494193	rs3014203:105253930:C:T	103494173	103494173	0	1.03223e-18	0.255006	0.025161	FALSE	-194	Promoter non-mGene mQTLs
cg08758237	chr10	103561960	103561959	rs142254497:105311828:G:GTGA	103552071	103552071	0	3.94212e-22	-0.373954	0.0327433	TRUE	-58092	Distal mGene mQTLs
cg06945810	chr10	103623008	103623007	rs3781351:105390200:T:A	103630442	103630442	0	9.81127e-09	-0.129592	0.0213354	FALSE	225101	Distal mGene mQTLs
cg04788957	chr10	103678251	103678250	rs12357919:105438112:T:C	103678354	103678354	0	8.24118e-28	-0.370288	0.0273357	FALSE	177189	Distal mGene mQTLs
cg19261727	chr10	103678311	103678310	rs12357919:105438112:T:C	103678354	103678354	0	8.60395e-16	-0.278839	0.0309328	FALSE	177189	Distal mGene mQTLs
cg00169964	chr10	103582158	103582157	rs11191773	103700643	103700643	0	7.49951e-08	-0.0996951	0.0176169	FALSE	154900	Distal non-mGene mQTLs
cg02733266	chr10	104254653	104254652	rs144343542:106014764:CCGG:C	104255006	104255009	0	3.395e-11	-0.294514	0.0411444	TRUE	-19650	Distal mGene mQTLs
cg23586589	chr10	104254867	104254866	rs144343542:106014764:CCGG:C	104255006	104255009	0	4.98948e-08	-0.217986	0.0379529	TRUE	-19650	Distal mGene mQTLs
cg19917656	chr10	104274898	104274897	rs641071:106028157:G:T	104268399	104268399	0	2.33071e-14	0.305591	0.0361582	FALSE	474	Promoter mGene mQTLs
cg13766030	chr10	104274930	104274929	rs276204:106035313:C:G	104275555	104275555	0	1.79894e-09	0.212119	0.0331002	FALSE	-6682	Distal mGene mQTLs
cg17383262	chr10	104275160	104275159	rs276204:106035313:C:G	104275555	104275555	0	1.0101e-16	0.307755	0.0328288	FALSE	-6682	Distal mGene mQTLs
cg23659134	chr10	104275411	104275410	rs276204:106035313:C:G	104275555	104275555	0	1.84647e-18	0.363693	0.0362276	FALSE	-6682	Distal mGene mQTLs
cg16609620	chr10	107145272	107145271	rs688353:108900899:G:A	107141141	107141141	0	6.05148e-10	-0.188545	0.0284885	FALSE	23393	Distal mGene mQTLs
cg22143635	chr10	107915337	107915336	rs10884570:109674913:C:G	107915155	107915155	0	1.54668e-07	-0.159554	0.0289729	FALSE	282694	Distal non-mGene mQTLs
cg03962527	chr10	110007122	110007121	rs17126936:111757126:C:T	109997368	109997368	0	1.7778e-08	0.342355	0.0574952	FALSE	-1000	Promoter mGene mQTLs
cg04447981	chr10	109923588	109923587	rs61881589:111763910:T:C	110004152	110004152	0	1.40975e-13	0.437496	0.0537509	TRUE	-7784	Distal non-mGene mQTLs
cg01525935	chr10	110005356	110005355	rs17814147:111814893:A:G	110055135	110055135	0	2.55713e-07	-0.436473	0.08083	FALSE	-58767	Distal mGene mQTLs
cg15054954	chr10	110207129	110207128	rs369184932:111970831:CTT:C	110211073	110211075	0	1.56218e-07	-0.152134	0.0276361	TRUE	-3468	Distal mGene mQTLs
cg16639185	chr10	110860975	110860974	rs7895872	110918899	110918899	0	1.82254e-16	0.243301	0.02623	TRUE	375	Promoter non-mGene mQTLs
cg22443219	chr10	110918889	110918888	rs7895872	110918899	110918899	0	6.93298e-35	0.403408	0.024828	FALSE	648	Promoter mGene mQTLs
cg08245930	chr10	113679874	113679873	rs10553596:115439640:CTT:C	113679881	113679883	0	2.57297e-19	0.223954	0.0216102	TRUE	-719	Promoter mGene mQTLs
cg20218110	chr10	114632160	114632159	rs11594779:116370918:A:G	114611159	114611159	0	1.73587e-18	-0.285393	0.0283993	TRUE	73844	Distal mGene mQTLs
cg12742577	chr10	114642979	114642978	rs11594779:116370918:A:G	114611159	114611159	0	2.9148e-07	-0.158769	0.0295562	TRUE	73844	Distal mGene mQTLs
cg03850986	chr10	114648624	114648623	rs11594779:116370918:A:G	114611159	114611159	0	2.09555e-10	-0.227902	0.0334197	TRUE	73844	Distal mGene mQTLs
cg01315572	chr10	114631792	114631791	rs11599283:116370934:C:A	114611175	114611175	0	3.04999e-20	-0.532375	0.0496967	TRUE	73828	Distal mGene mQTLs
cg03223072	chr10	114639155	114639154	rs11599283:116370934:C:A	114611175	114611175	0	4.95287e-17	-0.222601	0.0234474	TRUE	73828	Distal mGene mQTLs
cg12403162	chr10	114634799	114634798	rs35745645:116371229:G:GA	114611470	114611470	0	3.69129e-07	-0.156565	0.0294249	TRUE	73533	Distal mGene mQTLs
cg04055345	chr10	114505104	114505103	rs11196819:116393326:G:C	114633567	114633567	0	8.26933e-08	-0.123034	0.0218197	FALSE	51436	Distal mGene mQTLs
cg01449818	chr10	114526847	114526846	rs11196819:116393326:G:C	114633567	114633567	0	2.75271e-17	-0.216382	0.0225598	FALSE	51436	Distal mGene mQTLs
cg06769992	chr10	114577025	114577024	rs11196819:116393326:G:C	114633567	114633567	0	1.04746e-13	-0.221835	0.0270823	FALSE	51436	Distal mGene mQTLs
cg15294435	chr10	114631709	114631708	rs11196819:116393326:G:C	114633567	114633567	0	9.88665e-25	-0.42493	0.0342889	FALSE	51436	Distal mGene mQTLs
cg12736146	chr10	114631850	114631849	rs11196819:116393326:G:C	114633567	114633567	0	7.96312e-22	-0.399757	0.0353564	FALSE	51436	Distal mGene mQTLs
cg18680346	chr10	114632006	114632005	rs11196819:116393326:G:C	114633567	114633567	0	3.06989e-17	-0.798715	0.0834311	FALSE	51436	Distal mGene mQTLs
cg19936380	chr10	114632358	114632357	rs11196819:116393326:G:C	114633567	114633567	0	9.47589e-14	-0.235879	0.0287357	FALSE	51436	Distal mGene mQTLs
cg25722735	chr10	114632375	114632374	rs11196819:116393326:G:C	114633567	114633567	0	2.85836e-08	-0.136518	0.0233046	TRUE	51436	Distal mGene mQTLs
cg08587685	chr10	114632448	114632447	rs11196819:116393326:G:C	114633567	114633567	0	2.25719e-16	-0.314109	0.0339953	FALSE	51436	Distal mGene mQTLs
cg18574731	chr10	114655310	114655309	rs11196819:116393326:G:C	114633567	114633567	0	5.02391e-14	-0.182163	0.0218978	FALSE	51436	Distal mGene mQTLs
cg21050356	chr10	114655856	114655855	rs11196819:116393326:G:C	114633567	114633567	0	1.34417e-19	-0.366442	0.0349999	FALSE	51436	Distal mGene mQTLs
cg18316498	chr10	114822050	114822049	rs117282608:116396534:G:A	114636775	114636775	0	8.10391e-07	0.580747	0.112789	TRUE	48228	Distal non-mGene mQTLs
cg03668323	chr10	114497226	114497225	rs1109267:116405348:T:C	114645589	114645589	0	4.9547e-07	-0.0721962	0.0137335	TRUE	39414	Distal mGene mQTLs
cg26760942	chr10	114515471	114515470	rs1109267:116405348:T:C	114645589	114645589	0	7.29205e-17	-0.270738	0.0287132	FALSE	39414	Distal mGene mQTLs
cg11115176	chr10	114548781	114548780	rs1109267:116405348:T:C	114645589	114645589	0	1.40663e-09	-0.174768	0.0270703	FALSE	39414	Distal mGene mQTLs
cg02970258	chr10	114576299	114576298	rs1109267:116405348:T:C	114645589	114645589	0	2.45516e-09	-0.164298	0.0258827	FALSE	39414	Distal mGene mQTLs
cg06848487	chr10	114577445	114577444	rs1109267:116405348:T:C	114645589	114645589	0	2.94792e-09	-0.175898	0.0278671	FALSE	39414	Distal mGene mQTLs
cg02068171	chr10	114632844	114632843	rs1109267:116405348:T:C	114645589	114645589	0	8.83392e-09	-0.17156	0.0281475	FALSE	39414	Distal mGene mQTLs
cg16726772	chr10	114658839	114658838	rs1109267:116405348:T:C	114645589	114645589	0	2.44822e-10	-0.173811	0.0255977	FALSE	39414	Distal mGene mQTLs
cg10165222	chr10	117375102	117375101	exm859195	117375104	117375104	0	5.50806e-07	-0.196188	0.0374847	TRUE	363	Promoter mGene mQTLs
cg14976190	chr10	117554561	117554560	rs201955119:119303891:TA:T	117544380	117544381	0	1.3825e-07	-0.163706	0.0295993	TRUE	-1936	Promoter non-mGene mQTLs
cg16722154	chr10	118721634	118721633	rs1925942:120481153:T:C	118721641	118721641	0	3.78676e-19	-0.440007	0.0427195	TRUE	33608	Distal mGene mQTLs
cg19071246	chr10	118726569	118726568	rs55922320:120515435:C:T	118755923	118755923	0	1.02549e-09	0.154257	0.0236696	FALSE	-674	Promoter mGene mQTLs
cg23973591	chr10	118738251	118738250	rs11198591:120515892:G:A	118756380	118756380	0	1.83474e-15	-0.306718	0.0345166	FALSE	-1131	Promoter mGene mQTLs
cg16851766	chr10	119667972	119667971	rs196341	119657099	119657099	0	2.1095e-09	-0.103261	0.0161918	TRUE	-5729	Distal mGene mQTLs
cg20679084	chr10	120850647	120850646	rs10886780:122601003:C:T	120841491	120841491	0	5.51274e-09	0.277001	0.0447587	FALSE	9854	Distal non-mGene mQTLs
cg13596132	chr10	120850792	120850791	rs10886785:122610391:C:G	120850879	120850879	0	7.06926e-18	0.349319	0.0355823	FALSE	296	Promoter mGene mQTLs
cg24120153	chr10	120850975	120850974	rs10886785:122610391:C:G	120850879	120850879	0	1.41657e-26	0.570376	0.0435988	FALSE	296	Promoter mGene mQTLs
cg14149699	chr10	120851168	120851167	rs11199598:122610657:T:C	120851145	120851145	0	2.07884e-30	0.36975	0.0254521	FALSE	30	Promoter mGene mQTLs
cg13320271	chr10	121934617	121934616	rs10887024:123688152:A:T	121928637	121928637	0	6.93395e-10	-0.170193	0.0258172	TRUE	-325	Promoter mGene mQTLs
cg23691251	chr10	121928594	121928593	rs10887024:123688152:A:T	121928637	121928637	0	5.11092e-10	0.0912623	0.0137226	FALSE	164	Promoter mGene mQTLs
cg11364714	chr10	121928614	121928613	rs10887024:123688152:A:T	121928637	121928637	0	2.81818e-23	0.318847	0.026909	FALSE	164	Promoter mGene mQTLs
cg07444487	chr10	121928765	121928764	rs10887024:123688152:A:T	121928637	121928637	0	2.40317e-45	1.31779	0.064283	TRUE	164	Promoter mGene mQTLs
cg09943237	chr10	121928807	121928806	rs10887024:123688152:A:T	121928637	121928637	0	4.05389e-40	1.0091	0.0550592	FALSE	164	Promoter mGene mQTLs
cg20835665	chr10	121928816	121928815	rs10887024:123688152:A:T	121928637	121928637	0	5.82853e-40	1.16835	0.0639713	FALSE	164	Promoter mGene mQTLs
cg13812702	chr10	121928824	121928823	rs10887024:123688152:A:T	121928637	121928637	0	5.80783e-40	0.964849	0.0528271	FALSE	164	Promoter mGene mQTLs
cg27030141	chr10	121928845	121928844	rs10887024:123688152:A:T	121928637	121928637	0	4.00183e-32	0.888086	0.0584978	FALSE	164	Promoter mGene mQTLs
cg03417454	chr10	121928906	121928905	rs10887024:123688152:A:T	121928637	121928637	0	2.3695e-25	0.456955	0.0361959	FALSE	164	Promoter mGene mQTLs
cg12420900	chr10	122163349	122163348	rs10887095:123922866:C:G	122163351	122163351	0	1.0534e-14	-0.427704	0.0498025	FALSE	-174177	Distal mGene mQTLs
cg17875135	chr10	122466463	122466462	rs1810391:124236719:A:G	122477203	122477203	0	4.08898e-08	-0.219362	0.0379216	FALSE	-15678	Distal mGene mQTLs
cg23238440	chr10	122463301	122463300	rs4752700	122478096	122478096	1	3.84614e-08	-0.587655	0.101369	FALSE	-16571	Distal mGene mQTLs
cg04970100	chr10	122474331	122474330	rs4752700	122478096	122478096	0	3.53818e-17	-0.844604	0.0884431	FALSE	-16571	Distal mGene mQTLs
cg06241170	chr10	122490479	122490478	rs4752700	122478096	122478096	0	1.08369e-08	-0.150646	0.024883	FALSE	-16571	Distal mGene mQTLs
cg22701672	chr10	122499062	122499061	rs11200645:124238153:C:T	122478637	122478637	0	1.27457e-06	0.152237	0.0301558	FALSE	-17112	Distal mGene mQTLs
cg16466810	chr10	122474657	122474656	rs4991294:124238188:T:G	122478672	122478672	0	2.95074e-18	-0.873667	0.0877023	TRUE	-17147	Distal mGene mQTLs
cg23402541	chr10	122487631	122487630	rs4991294:124238188:T:G	122478672	122478672	1	2.58602e-09	-0.636324	0.100404	TRUE	-17147	Distal mGene mQTLs
cg23238440	chr10	122463301	122463300	rs5788561:124243660:CA:C	122484144	122484145	0	3.92447e-11	1.30471	0.182954	TRUE	-22619	Distal mGene mQTLs
cg04970100	chr10	122474331	122474330	rs5788561:124243660:CA:C	122484144	122484145	1	1.90085e-07	1.05629	0.193345	TRUE	-22619	Distal mGene mQTLs
cg16466810	chr10	122474657	122474656	rs5788561:124243660:CA:C	122484144	122484145	1	1.34344e-07	1.06811	0.192911	TRUE	-22619	Distal mGene mQTLs
cg23402541	chr10	122487631	122487630	rs5788561:124243660:CA:C	122484144	122484145	0	1.29213e-10	1.27413	0.184385	TRUE	-22619	Distal mGene mQTLs
cg01240734	chr10	122981109	122981108	rs115544767:124762748:C:T	123003232	123003232	0	1.38332e-07	-0.918995	0.166165	TRUE	5585	Distal non-mGene mQTLs
cg13677800	chr10	123667083	123667082	rs12263344:125426412:A:G	123666896	123666896	0	5.06836e-09	0.212272	0.0342077	FALSE	-541	Promoter mGene mQTLs
cg03451695	chr10	123881269	123881268	rs28756735:125655317:G:A	123895801	123895801	0	6.88346e-08	-0.218068	0.0384133	TRUE	44466	Distal mGene mQTLs
cg02693002	chr10	124418026	124418025	rs4144117:126107506:A:C	124418937	124418937	0	2.08777e-08	-0.201765	0.0340708	FALSE	39	Promoter mGene mQTLs
cg16933922	chr10	124418046	124418045	rs4144117:126107506:A:C	124418937	124418937	0	2.95699e-11	-0.335139	0.0466542	FALSE	39	Promoter mGene mQTLs
cg08734600	chr10	124447660	124447659	rs146495217:126136239:A:G	124447670	124447670	0	4.39642e-07	0.115426	0.0218488	TRUE	2514	Distal mGene mQTLs
cg13279863	chr10	124461522	124461521	rs2459213:126150338:C:T	124461769	124461769	0	8.31126e-22	0.34252	0.0303128	FALSE	65	Promoter mGene mQTLs
cg27306870	chr10	124605164	124605163	rs11812870:126293719:C:G	124605150	124605150	0	1.39788e-06	0.086377	0.0171803	FALSE	-143316	Distal mGene mQTLs
cg04426802	chr10	124626112	124626111	rs3781476:126314475:C:T	124625906	124625906	0	5.40933e-15	-0.63426	0.0728863	FALSE	118363	Distal mGene mQTLs
cg07984614	chr10	124626230	124626229	rs3781476:126314475:C:T	124625906	124625906	0	1.12251e-16	-0.670738	0.0716839	FALSE	118363	Distal mGene mQTLs
cg20435097	chr10	124632256	124632255	rs3781472:126316951:C:T	124628382	124628382	0	2.0647e-10	-0.148102	0.0217089	FALSE	115887	Distal mGene mQTLs
cg16404170	chr10	124642308	124642307	rs61870502:126330758:C:T	124642189	124642189	0	2.51301e-07	0.416566	0.0770901	FALSE	102080	Distal mGene mQTLs
cg07081759	chr10	124642337	124642336	rs61870502:126330758:C:T	124642189	124642189	0	6.21815e-09	0.448766	0.0727937	FALSE	102080	Distal mGene mQTLs
cg22424108	chr10	124916742	124916741	rs10901841:126632386:C:A	124943817	124943817	0	2.00625e-27	1.37954	0.102945	FALSE	-1694	Promoter non-mGene mQTLs
cg03862225	chr10	125161886	125161885	rs11355614:126845962:TA:T	125157393	125157394	0	2.97915e-18	0.389504	0.0391062	TRUE	3777	Distal mGene mQTLs
cg24059708	chr10	128211150	128211149	rs4750690:130010323:G:A	128212059	128212059	0	1.02764e-17	-0.283228	0.0290335	FALSE	-31027	Distal non-mGene mQTLs
cg24550112	chr10	130191124	130191123	rs61874388:131934894:C:T	130136630	130136630	0	7.69676e-12	-0.29411	0.0395901	FALSE	-231	Promoter non-mGene mQTLs
cg11229864	chr10	130129186	130129185	rs12248841	130146988	130146988	0	2.60995e-09	0.10026	0.0158242	FALSE	-10589	Distal non-mGene mQTLs
cg27139424	chr10	130129291	130129290	rs12248841	130146988	130146988	0	8.08512e-10	0.192637	0.0293529	FALSE	-10589	Distal non-mGene mQTLs
cg22030847	chr10	131982973	131982972	rs9419217:133758379:A:G	131944875	131944875	0	7.17706e-09	0.157803	0.0257159	TRUE	-44231	Distal non-mGene mQTLs
cg02388416	chr10	131982845	131982844	rs111632741:133795801:T:G	131982297	131982297	0	3.38545e-07	0.201207	0.0376826	FALSE	-284	Promoter mGene mQTLs
cg11312524	chr10	132176309	132176308	rs187150997:134000888:T:C	132187384	132187384	0	1.5374e-07	-0.0905275	0.0164348	TRUE	-1422	Promoter non-mGene mQTLs
cg09582238	chr10	132164801	132164800	rs148050247:134002827:TTCTC:T	132189323	132189327	0	3.73788e-11	0.332245	0.0465307	FALSE	-2423	Promoter non-mGene mQTLs
cg02541125	chr10	132686249	132686248	rs3935055:134360918:G:A	132547414	132547414	0	1.38439e-09	-0.209897	0.0324961	TRUE	-9594	Distal mGene mQTLs
cg16399624	chr10	132739685	132739684	rs7071784:134559980:T:C	132746476	132746476	0	1.51551e-07	-0.105818	0.0192001	FALSE	-208656	Distal mGene mQTLs
cg16056164	chr10	132942098	132942097	rs56100128:134755852:T:C	132942348	132942348	0	3.46101e-18	0.23298	0.0234495	FALSE	475	Promoter non-mGene mQTLs
cg02008416	chr10	132962039	132962038	rs7095459:134775568:G:C	132962064	132962064	0	1.35069e-10	-0.152689	0.022123	FALSE	173	Promoter non-mGene mQTLs
cg01420001	chr10	133129781	133129780	10:134973451:C:CGCCCCGCCCCCTCCCGG	133159947	133159947	0	2.82362e-07	0.141627	0.0263315	TRUE	500	Promoter non-mGene mQTLs
cg09435798	chr10	133309249	133309248	rs2995335:135121432:G:C	133307928	133307928	0	2.87552e-24	0.569256	0.0465863	FALSE	547	Promoter mGene mQTLs
cg24905316	chr10	133372840	133372839	rs376187127:135187096:GCGCCCC:G	133373592	133373598	0	7.80608e-21	0.610061	0.0557903	TRUE	97	Promoter mGene mQTLs
cg13506696	chr11	236782	236781	rs6598070:225466:T:C	225466	225466	0	1.25275e-23	0.586936	0.0489904	FALSE	11465	Distal non-mGene mQTLs
cg02925222	chr11	280446	280445	rs760058:279214:G:C	279214	279214	0	9.06149e-07	-0.0851206	0.0166112	TRUE	-849	Promoter mGene mQTLs
cg18727742	chr11	288302	288301	rs10751646:288022:G:A	288022	288022	0	1.48054e-10	0.202143	0.0293613	FALSE	1113	Promoter mGene mQTLs
cg08829299	chr11	288306	288305	rs741737:288505:T:C	288505	288505	0	5.85283e-09	-0.174269	0.028213	FALSE	630	Promoter mGene mQTLs
cg19336497	chr11	368639	368638	rs10902159:406615:C:T	406615	406615	0	2.21475e-07	-0.163278	0.030066	TRUE	10840	Distal non-mGene mQTLs
cg18351999	chr11	406902	406901	rs7395890:407236:T:C	407236	407236	1	2.86925e-08	0.769176	0.131321	FALSE	10219	Distal mGene mQTLs
cg14897765	chr11	406493	406492	11:407364:C:CATGGG	407364	407364	0	1.04332e-14	0.39414	0.0458854	FALSE	10091	Distal mGene mQTLs
cg25342433	chr11	410157	410156	rs7131456:410462:A:G	410462	410462	0	2.11453e-07	0.156981	0.028854	FALSE	6993	Distal mGene mQTLs
cg04339012	chr11	410193	410192	rs7131456:410462:A:G	410462	410462	0	2.43533e-11	0.154002	0.0213327	FALSE	6993	Distal mGene mQTLs
cg18787012	chr11	504938	504937	rs72851107:450987:G:C	450987	450987	0	1.28168e-13	-0.333256	0.0408604	FALSE	-2719	Distal non-mGene mQTLs
cg02807984	chr11	722259	722258	rs10902194:694257:G:A	694257	694257	0	1.08175e-07	0.329973	0.0591094	FALSE	181	Promoter mGene mQTLs
cg13555772	chr11	705749	705748	rs7945422:695854:C:T	695854	695854	0	1.78202e-08	-0.156113	0.0262199	FALSE	-1416	Promoter mGene mQTLs
cg00115288	chr11	705893	705892	rs7945422:695854:C:T	695854	695854	0	1.67564e-10	-0.221706	0.0323119	FALSE	-1416	Promoter mGene mQTLs
cg14135214	chr11	706000	705999	rs7945422:695854:C:T	695854	695854	0	8.00441e-12	-0.306277	0.0412674	FALSE	-1416	Promoter mGene mQTLs
cg09624752	chr11	695874	695873	rs7945422:695854:C:T	695854	695854	0	4.43268e-07	0.101049	0.0191339	TRUE	-426	Promoter mGene mQTLs
cg07279715	chr11	772788	772787	exm2267143	772701	772701	0	2.52464e-19	-0.208332	0.0200967	FALSE	4787	Distal mGene mQTLs
cg13353733	chr11	773107	773106	exm2267143	772701	772701	0	4.57957e-23	-0.215317	0.0182932	FALSE	4787	Distal mGene mQTLs
cg07415359	chr11	790294	790293	rs77173309:804027:G:A	804027	804027	0	1.39105e-18	0.283468	0.0281056	FALSE	5726	Distal non-mGene mQTLs
cg06888460	chr11	790670	790669	rs77173309:804027:G:A	804027	804027	0	1.88482e-15	0.280304	0.0315604	FALSE	5726	Distal non-mGene mQTLs
cg06815194	chr11	794444	794443	rs72844798:809666:G:A	809666	809666	0	1.05607e-06	-0.288521	0.0566805	TRUE	-19	Promoter non-mGene mQTLs
cg26621248	chr11	831889	831888	rs28648546:833327:A:G	833327	833327	0	1.18581e-08	-0.174606	0.0289271	FALSE	-484	Promoter mGene mQTLs
cg03885332	chr11	832358	832357	rs28454516:833828:G:A	833828	833828	0	2.45695e-09	-0.186322	0.0293529	FALSE	-985	Promoter mGene mQTLs
cg02798112	chr11	838101	838100	rs28454516:833828:G:A	833828	833828	0	1.31272e-10	-0.180242	0.0260949	TRUE	-985	Promoter mGene mQTLs
cg18856995	chr11	841377	841376	rs28478991:833872:C:A	833872	833872	0	3.66725e-07	-0.140802	0.0264553	FALSE	-1029	Promoter non-mGene mQTLs
cg01743873	chr11	833709	833708	rs28478991:833872:C:A	833872	833872	0	7.65401e-25	-0.416973	0.0335345	FALSE	-1029	Promoter mGene mQTLs
cg22596326	chr11	832779	832778	rs72847212:834389:T:C	834389	834389	0	2.19078e-18	0.831021	0.0830116	TRUE	-1546	Promoter mGene mQTLs
cg08498830	chr11	832798	832797	rs72847212:834389:T:C	834389	834389	0	9.91766e-12	0.292416	0.0396072	FALSE	-1546	Promoter mGene mQTLs
cg24508095	chr11	838488	838487	rs6597977:834802:A:G	834802	834802	0	1.78075e-09	-0.123468	0.0192608	FALSE	-1959	Promoter mGene mQTLs
cg09535011	chr11	840408	840407	rs7126859:835407:C:T	835407	835407	0	2.09316e-08	-0.141239	0.0238523	FALSE	-9263	Distal non-mGene mQTLs
cg03116740	chr11	841336	841335	rs10678550:842099:G:GAA	842099	842099	0	6.97205e-08	0.114146	0.0201166	FALSE	709	Promoter mGene mQTLs
cg15787769	chr11	842745	842744	rs9704922:842775:G:A	842775	842775	0	4.33632e-14	0.26968	0.0323193	FALSE	33	Promoter mGene mQTLs
cg16425592	chr11	842749	842748	rs9704922:842775:G:A	842775	842775	0	1.31374e-12	0.327336	0.0422584	FALSE	33	Promoter mGene mQTLs
cg18915466	chr11	842751	842750	rs9704922:842775:G:A	842775	842775	0	1.03469e-12	0.275966	0.0354326	TRUE	33	Promoter mGene mQTLs
cg07691484	chr11	842765	842764	rs9704922:842775:G:A	842775	842775	0	1.45835e-13	0.314248	0.0386367	FALSE	33	Promoter mGene mQTLs
cg07269682	chr11	843916	843915	rs9704922:842775:G:A	842775	842775	0	7.05179e-11	-0.205501	0.0292612	FALSE	33	Promoter mGene mQTLs
cg06179011	chr11	843898	843897	rs7945642:849587:C:G	849587	849587	0	9.62545e-08	0.137683	0.0245559	FALSE	-6779	Distal mGene mQTLs
cg22143635	chr11	980568	980567	rs7482491:926958:C:T	926958	926958	0	5.92433e-10	-1.36049	0.205439	TRUE	-2064	Promoter mGene mQTLs
cg08208480	chr11	1391864	1391863	rs7395567:1413056:T:C	1391826	1391826	0	1.22461e-18	0.733493	0.0725741	TRUE	-1927	Promoter mGene mQTLs
cg17416644	chr11	1453612	1453611	rs4072884:1482720:C:T	1461490	1461490	0	1.83112e-15	0.286121	0.0321975	FALSE	-71591	Distal mGene mQTLs
cg06231783	chr11	1453819	1453818	rs4072884:1482720:C:T	1461490	1461490	0	8.09315e-22	0.244228	0.0216057	FALSE	-71591	Distal mGene mQTLs
cg05728216	chr11	1863781	1863780	rs673791:1885025:C:G	1863795	1863795	0	2.09485e-10	-0.134617	0.0197402	TRUE	-10825	Distal mGene mQTLs
cg05928581	chr11	1863868	1863867	rs11041540:1885026:A:T	1863796	1863796	0	1.93144e-10	-0.278545	0.0407543	FALSE	-10826	Distal mGene mQTLs
cg10337079	chr11	2137468	2137467	rs11603378:2165173:T:G	2143943	2143943	0	1.49669e-10	0.174908	0.025413	FALSE	17266	Distal mGene mQTLs
cg25742037	chr11	2150465	2150464	rs7948458:2172830:A:C	2151600	2151600	0	1.9025e-23	0.261786	0.0219751	FALSE	9609	Distal mGene mQTLs
cg21191514	chr11	2166692	2166691	rs12419447:2187855:G:C	2166625	2166625	0	1.03586e-17	0.290448	0.0297777	FALSE	5252	Distal mGene mQTLs
cg21910779	chr11	2399420	2399419	rs16928242:2421531:T:C	2400301	2400301	0	1.72773e-11	-0.356585	0.0489688	TRUE	187	Promoter mGene mQTLs
cg25332499	chr11	2869029	2869028	rs7942590:2633715:G:C	2612485	2612485	0	7.15973e-09	-0.109788	0.0178898	TRUE	-167801	Distal non-mGene mQTLs
cg03196265	chr11	2869848	2869847	rs7942590:2633715:G:C	2612485	2612485	0	1.59269e-11	-0.153302	0.0210097	TRUE	-167801	Distal non-mGene mQTLs
cg01094564	chr11	3641969	3641968	rs7128137	3641971	3641971	0	2.70331e-19	0.27277	0.0263412	FALSE	345	Promoter mGene mQTLs
cg06974175	chr11	3641738	3641737	rs1567921:3663409:T:C	3642179	3642179	0	1.43191e-11	-0.138803	0.0189722	TRUE	137	Promoter mGene mQTLs
cg27192049	chr11	3670589	3670588	rs2672216:3692024:C:T	3670794	3670794	0	8.87715e-17	-0.197207	0.020988	FALSE	590	Promoter mGene mQTLs
cg06349174	chr11	3856247	3856246	rs11030106	3860500	3860500	0	1.07609e-11	0.156508	0.0212412	FALSE	-5973	Distal mGene mQTLs
cg17706456	chr11	5596138	5596137	rs58023584:5617611:G:A	5596381	5596381	0	1.42902e-10	0.336939	0.0488936	TRUE	-272	Promoter mGene mQTLs
cg19872996	chr11	5596474	5596473	rs58023584:5617611:G:A	5596381	5596381	0	1.16061e-09	0.315274	0.0485542	TRUE	-272	Promoter mGene mQTLs
cg14304349	chr11	5596583	5596582	rs58023584:5617611:G:A	5596381	5596381	0	5.71725e-09	0.406584	0.0657737	TRUE	-272	Promoter mGene mQTLs
cg00827519	chr11	5596627	5596626	rs58023584:5617611:G:A	5596381	5596381	0	1.64707e-10	0.557456	0.0812066	TRUE	-272	Promoter mGene mQTLs
cg15137954	chr11	5596794	5596793	rs58023584:5617611:G:A	5596381	5596381	0	1.06963e-10	0.294173	0.0423549	TRUE	-272	Promoter mGene mQTLs
cg22133704	chr11	5596697	5596696	rs58023584:5617611:G:A	5596381	5596381	0	1.08214e-09	0.508639	0.0781713	TRUE	344	Promoter mGene mQTLs
cg27390769	chr11	5600462	5600461	rs7125514:5622184:A:C	5600954	5600954	0	5.91981e-09	0.167434	0.0271163	FALSE	-4845	Distal mGene mQTLs
cg05122965	chr11	5685133	5685132	rs3802980	5685081	5685081	0	1.19103e-09	-0.128955	0.0198752	FALSE	253538	Distal mGene mQTLs
cg24098643	chr11	5685206	5685205	rs3802980	5685081	5685081	0	2.89416e-09	-0.167362	0.0264996	FALSE	253538	Distal mGene mQTLs
cg03135704	chr11	5690880	5690879	rs7129909:5711177:A:G	5689947	5689947	0	1.52251e-07	0.109032	0.0197869	TRUE	-258	Promoter mGene mQTLs
cg09010107	chr11	6272059	6272058	rs146196544:6222553:C:T	6201323	6201323	0	7.30925e-25	-2.5306	0.203397	TRUE	1930	Promoter non-mGene mQTLs
cg15907158	chr11	6571356	6571355	rs11040930	6597318	6597318	0	4.05979e-11	-0.28864	0.0405101	FALSE	6302	Distal non-mGene mQTLs
cg14772227	chr11	6571516	6571515	rs11040930	6597318	6597318	0	3.94938e-14	-0.330163	0.0394911	FALSE	6302	Distal non-mGene mQTLs
cg18302375	chr11	6619843	6619842	rs1800752:6640869:A:G	6619638	6619638	0	4.86569e-11	-0.195673	0.0275918	FALSE	-177	Promoter mGene mQTLs
cg08935899	chr11	6630482	6630481	rs2659872:6651810:A:G	6630579	6630579	0	9.58903e-08	-0.147462	0.0262963	FALSE	25275	Distal mGene mQTLs
cg19434143	chr11	6630484	6630483	rs2659872:6651810:A:G	6630579	6630579	0	1.38623e-12	-0.132606	0.0171404	FALSE	25275	Distal mGene mQTLs
cg00283472	chr11	6630758	6630757	rs2659872:6651810:A:G	6630579	6630579	0	6.80311e-13	-0.180703	0.0229821	FALSE	25275	Distal mGene mQTLs
cg12578013	chr11	8057280	8057279	rs61879615:8081940:A:C	8060393	8060393	0	3.86537e-07	-0.111201	0.0209383	FALSE	-41149	Distal mGene mQTLs
cg22902089	chr11	8658923	8658922	rs10840112:8710511:C:T	8688964	8688964	0	1.42514e-12	0.145112	0.0187688	FALSE	-6553	Distal non-mGene mQTLs
cg25873522	chr11	8715186	8715185	rs10840114:8736695:T:C	8715148	8715148	0	1.62449e-07	-0.176256	0.0320662	FALSE	195803	Distal mGene mQTLs
cg11546510	chr11	8769227	8769226	rs10743087:8786058:C:T	8764511	8764511	0	1.25373e-16	0.200681	0.0214899	FALSE	4267	Distal non-mGene mQTLs
cg05416934	chr11	8766673	8766672	rs10734637:8788225:A:C	8766678	8766678	0	2.74132e-09	-0.11526	0.0182194	TRUE	144273	Distal mGene mQTLs
cg07587639	chr11	8774182	8774181	rs183796111:8828185:A:C	8806638	8806638	0	4.51688e-10	0.8326	0.124752	TRUE	-37860	Distal non-mGene mQTLs
cg16384885	chr11	8774269	8774268	rs183796111:8828185:A:C	8806638	8806638	0	7.89249e-08	0.8551	0.151388	TRUE	-37860	Distal non-mGene mQTLs
cg08710564	chr11	8807892	8807891	rs10743091:8833359:C:T	8811812	8811812	0	2.65355e-10	0.220329	0.0325215	FALSE	99139	Distal mGene mQTLs
cg27246280	chr11	9384517	9384516	rs6486307	9384476	9384476	0	1.08403e-17	0.180818	0.0185524	FALSE	146	Promoter mGene mQTLs
cg14763985	chr11	10450127	10450126	rs6484291:10471738:A:G	10450191	10450191	0	1.07151e-17	-0.280932	0.0288186	TRUE	-141878	Distal mGene mQTLs
cg11734620	chr11	10450141	10450140	rs6484291:10471738:A:G	10450191	10450191	0	1.10568e-18	-0.245281	0.0242285	FALSE	-141878	Distal mGene mQTLs
cg24435741	chr11	10449825	10449824	rs7938316:10472064:C:T	10450517	10450517	0	6.95206e-08	-0.165012	0.0290779	FALSE	-142204	Distal mGene mQTLs
cg07356130	chr11	10750975	10750974	rs2279696	10751008	10751008	0	1.56848e-16	0.297926	0.0320321	FALSE	-21	Promoter mGene mQTLs
cg22091621	chr11	10810226	10810225	rs16908333:10830677:C:G	10809130	10809130	0	7.71045e-29	0.459558	0.0329825	FALSE	-20	Promoter mGene mQTLs
cg12032795	chr11	10864895	10864894	rs771372:10880371:T:A	10858824	10858824	0	2.26085e-09	0.220736	0.0346857	FALSE	-565	Promoter mGene mQTLs
cg15887210	chr11	10858842	10858841	rs771372:10880371:T:A	10858824	10858824	0	2.38942e-15	0.147593	0.0166937	FALSE	-28	Promoter mGene mQTLs
cg03821689	chr11	12051619	12051618	rs11022131	12050666	12050666	0	1.33295e-09	0.189131	0.0292478	FALSE	-19791	Distal non-mGene mQTLs
cg26217847	chr11	12256238	12256237	rs35069152:12431931:G:A	12410384	12410384	0	8.76996e-09	-0.462871	0.0759245	TRUE	-33199	Distal non-mGene mQTLs
cg22756951	chr11	13111106	13111105	rs12797847:13132622:A:G	13111075	13111075	0	2.61654e-17	-0.29929	0.0311762	FALSE	23764	Distal non-mGene mQTLs
cg16294659	chr11	13278716	13278715	rs4353253:13310263:G:C	13288716	13288716	0	8.35631e-27	0.352888	0.0267983	FALSE	-12064	Distal mGene mQTLs
cg04321426	chr11	13298691	13298690	rs6486116:13319838:A:C	13298291	13298291	0	5.67561e-10	0.155849	0.0235048	FALSE	-21639	Distal mGene mQTLs
cg16260343	chr11	13873370	13873369	rs10766116:13895407:G:A	13873860	13873860	1	2.90791e-08	0.686474	0.117256	FALSE	5639	Distal non-mGene mQTLs
cg21415227	chr11	13964365	13964364	rs10766139:14154069:A:T	14132523	14132523	0	8.49112e-10	0.142348	0.0217213	FALSE	-169834	Distal mGene mQTLs
cg04547675	chr11	13964616	13964615	rs10766139:14154069:A:T	14132523	14132523	0	1.90127e-18	0.245755	0.0244915	FALSE	-169834	Distal mGene mQTLs
cg01880540	chr11	14258788	14258787	rs2303972:14303282:T:A	14281736	14281736	0	2.24407e-09	0.134143	0.021074	FALSE	82770	Distal non-mGene mQTLs
cg24278870	chr11	14259508	14259507	rs55793703:14320324:T:TA	14298778	14298778	0	1.24971e-12	0.15965	0.0205869	TRUE	65728	Distal non-mGene mQTLs
cg16724696	chr11	14259197	14259196	rs55793703:14320324:T:TA	14298778	14298778	0	1.37544e-08	0.15559	0.0259046	FALSE	65728	Distal non-mGene mQTLs
cg21409469	chr11	14261230	14261229	rs79620658:14330638:CCAA:C	14309092	14309095	0	1.05806e-06	-0.18781	0.0368987	TRUE	55414	Distal non-mGene mQTLs
cg01475538	chr11	14359689	14359688	rs35405878:14346856:AT:A	14325310	14325311	0	1.25348e-06	0.0655463	0.0129741	TRUE	39196	Distal mGene mQTLs
cg11985186	chr11	14905235	14905234	rs10832314:14926414:A:G	14904868	14904868	0	7.31532e-10	0.218928	0.0332617	FALSE	129	Promoter non-mGene mQTLs
cg15258974	chr11	14905911	14905910	rs10832314:14926414:A:G	14904868	14904868	0	5.54934e-23	0.402751	0.0343084	FALSE	129	Promoter non-mGene mQTLs
cg15378786	chr11	17014591	17014590	rs7930890:17024699:G:A	17003152	17003152	0	2.42816e-23	0.290963	0.0245057	FALSE	11291	Distal mGene mQTLs
cg15084286	chr11	17014596	17014595	rs34502475:17030940:G:A	17009393	17009393	0	1.90095e-20	-0.277004	0.025673	FALSE	5050	Distal mGene mQTLs
cg04472447	chr11	17238599	17238598	rs12420958:17100432:G:T	17078885	17078885	0	1.87987e-09	-0.162762	0.0254324	FALSE	-1098	Promoter non-mGene mQTLs
cg13185308	chr11	17477273	17477272	rs3834456:17498869:T:TGTG	17477322	17477322	0	4.93079e-18	0.251552	0.0254688	FALSE	-477	Promoter mGene mQTLs
cg14980620	chr11	17692338	17692337	rs12785437:17716558:G:A	17695011	17695011	0	2.03673e-10	0.136867	0.0200545	FALSE	11	Promoter non-mGene mQTLs
cg25160847	chr11	17696272	17696271	rs34780394:17717423:A:G	17695876	17695876	0	5.44348e-08	-0.148241	0.025891	FALSE	-854	Promoter non-mGene mQTLs
cg23625312	chr11	18013080	18013079	rs3741200:18034696:A:G	18013149	18013149	0	1.65738e-24	0.521151	0.0423397	FALSE	13	Promoter mGene mQTLs
cg14474618	chr11	18412199	18412198	11:18415236:CA:C	18393689	18393690	0	1.94598e-21	-0.499034	0.0447117	FALSE	699	Promoter non-mGene mQTLs
cg16885277	chr11	18412202	18412201	11:18415236:CA:C	18393689	18393690	0	4.07738e-24	-0.660404	0.0542973	TRUE	699	Promoter non-mGene mQTLs
cg14764745	chr11	18412625	18412624	11:18415236:CA:C	18393689	18393690	0	3.47801e-38	-1.09561	0.0624303	TRUE	699	Promoter non-mGene mQTLs
cg17841765	chr11	18412808	18412807	11:18415236:CA:C	18393689	18393690	0	1.97813e-27	-0.59406	0.0443227	FALSE	699	Promoter non-mGene mQTLs
cg02410801	chr11	18394196	18394195	rs11605386:18433720:C:G	18412173	18412173	0	3.38761e-11	-0.266405	0.0372154	FALSE	134	Promoter non-mGene mQTLs
cg03920003	chr11	18455833	18455832	rs3740714:18433889:A:C	18412342	18412342	0	2.03601e-07	-0.270668	0.0496765	TRUE	-35	Promoter non-mGene mQTLs
cg22732644	chr11	18522492	18522491	rs3740714:18433889:A:C	18412342	18412342	0	3.19683e-09	-0.175719	0.027909	FALSE	-35	Promoter non-mGene mQTLs
cg02184246	chr11	18634621	18634620	rs12289703:18656174:G:A	18634627	18634627	0	4.6691e-11	0.203883	0.0287187	TRUE	164	Promoter mGene mQTLs
cg20219074	chr11	18634532	18634531	rs2084220:18656932:C:T	18635385	18635385	0	1.01788e-09	0.137319	0.021066	FALSE	-594	Promoter mGene mQTLs
cg09201001	chr11	18634535	18634534	rs2084220:18656932:C:T	18635385	18635385	0	1.08585e-14	0.193592	0.0225558	FALSE	-594	Promoter mGene mQTLs
cg27153059	chr11	18698396	18698395	rs117069882:18720339:C:T	18698792	18698792	0	1.83324e-10	0.333003	0.0486523	FALSE	-5670	Distal mGene mQTLs
cg12788982	chr11	18707119	18707118	exm895058	18707103	18707103	0	5.79889e-17	-0.281479	0.0297317	TRUE	19127	Distal mGene mQTLs
cg06671842	chr11	18791931	18791930	rs4277090:18813489:G:T	18791942	18791942	0	1.6277e-15	-0.807051	0.0906147	FALSE	779	Promoter mGene mQTLs
cg02900213	chr11	20364211	20364210	rs10437608:20385606:G:A	20364060	20364060	0	3.00549e-11	-0.174067	0.0242417	FALSE	-375	Promoter mGene mQTLs
cg15585294	chr11	22666096	22666095	rs2307895:22647681:T:TAGAAA	22626135	22626135	0	2.54344e-11	-0.195886	0.0271645	TRUE	-493	Promoter mGene mQTLs
cg07802401	chr11	26332511	26332510	rs7117246	26331574	26331574	0	9.96491e-18	0.287645	0.0294709	FALSE	-21975	Distal mGene mQTLs
cg23076476	chr11	26331938	26331937	rs1531394:26353643:T:A	26332096	26332096	0	5.71824e-09	0.155289	0.0251215	FALSE	-22497	Distal mGene mQTLs
cg02081430	chr11	26331555	26331554	rs2882351:26354595:C:T	26333048	26333048	0	5.31226e-11	0.156811	0.0221626	FALSE	-23449	Distal mGene mQTLs
cg10019758	chr11	27391624	27391623	rs12803615:27418225:G:T	27396678	27396678	0	1.43946e-08	-0.148393	0.0247441	FALSE	76097	Distal mGene mQTLs
cg00213082	chr11	27473219	27473218	rs4617543	27460805	27460805	0	3.15442e-07	-0.194284	0.0362824	FALSE	11970	Distal non-mGene mQTLs
cg06731443	chr11	27473164	27473163	rs4617543	27460805	27460805	0	4.48312e-09	-0.271341	0.0435567	FALSE	11970	Distal mGene mQTLs
cg00165862	chr11	30322827	30322826	rs1222219:30344345:G:C	30322798	30322798	0	6.44797e-08	-0.269641	0.0473845	FALSE	253	Promoter non-mGene mQTLs
cg06547386	chr11	30585981	30585980	rs188394:30608012:C:T	30586465	30586465	0	7.10902e-08	-0.474299	0.0836479	FALSE	407	Promoter mGene mQTLs
cg23846459	chr11	32829986	32829985	rs139996204:32851538:C:CT	32829992	32829992	0	4.15084e-13	0.321666	0.0404613	TRUE	-49	Promoter mGene mQTLs
cg19005368	chr11	32830405	32830404	rs71034622:32852039:T:TG	32830493	32830493	0	2.16841e-09	-1.09207	0.171385	FALSE	-550	Promoter mGene mQTLs
cg09089242	chr11	33870691	33870690	rs2273798:33892049:G:A	33870503	33870503	0	3.08179e-11	0.135713	0.0189124	FALSE	21786	Distal mGene mQTLs
cg06148118	chr11	33870701	33870700	rs2273798:33892049:G:A	33870503	33870503	0	2.8193e-09	0.129161	0.0204344	FALSE	21786	Distal mGene mQTLs
cg26135716	chr11	34359149	34359148	rs2611134:34380706:A:G	34359159	34359159	0	4.98544e-07	0.0826485	0.0157259	FALSE	-1151	Promoter non-mGene mQTLs
cg25948180	chr11	34915235	34915234	rs57257751:34927722:T:G	34906175	34906175	0	4.62976e-12	0.223314	0.0296936	TRUE	9654	Distal mGene mQTLs
cg03305906	chr11	34915572	34915571	rs57257751:34927722:T:G	34906175	34906175	0	9.35145e-14	0.438211	0.0533695	TRUE	9654	Distal mGene mQTLs
cg02333667	chr11	34913134	34913133	rs57257751:34927722:T:G	34906175	34906175	0	1.20005e-09	0.188905	0.0291215	TRUE	10324	Distal mGene mQTLs
cg04125208	chr11	35139683	35139682	rs353558	35140123	35140123	0	1.57756e-08	0.699365	0.116977	FALSE	-1253	Promoter mGene mQTLs
cg22934516	chr11	35392405	35392404	rs60103066:35426965:AT:A	35405418	35405419	0	1.79317e-07	0.170899	0.0312109	TRUE	14645	Distal mGene mQTLs
cg24190415	chr11	35419466	35419465	rs1923294:35439816:A:G	35418269	35418269	0	6.86298e-10	0.17276	0.0261987	FALSE	1794	Promoter mGene mQTLs
cg04484994	chr11	35375361	35375360	rs1173923:35451976:G:T	35430429	35430429	0	8.82616e-16	-0.25794	0.0286281	FALSE	99871	Distal non-mGene mQTLs
cg02749887	chr11	35377450	35377449	rs1173923:35451976:G:T	35430429	35430429	0	1.07889e-17	-0.303258	0.0311125	FALSE	99871	Distal non-mGene mQTLs
cg10838469	chr11	35404005	35404004	rs1173923:35451976:G:T	35430429	35430429	0	5.40726e-12	-0.172246	0.0229886	FALSE	99871	Distal non-mGene mQTLs
cg21644468	chr11	35402798	35402797	rs7767:35453719:C:T	35432172	35432172	0	2.18904e-19	-0.30742	0.0295885	FALSE	98128	Distal non-mGene mQTLs
cg13589810	chr11	35313683	35313682	rs1516988:35479735:T:C	35458187	35458187	0	3.49592e-11	0.238119	0.0332909	FALSE	72113	Distal non-mGene mQTLs
cg00156216	chr11	35343065	35343064	rs1516988:35479735:T:C	35458187	35458187	0	4.12007e-09	0.190754	0.030539	TRUE	72113	Distal non-mGene mQTLs
cg01351425	chr11	35352790	35352789	rs1516988:35479735:T:C	35458187	35458187	1	2.04773e-07	0.562559	0.103271	FALSE	72113	Distal non-mGene mQTLs
cg14432744	chr11	35365880	35365879	rs1516988:35479735:T:C	35458187	35458187	0	2.97294e-10	0.169656	0.0251216	TRUE	72113	Distal non-mGene mQTLs
cg14149680	chr11	35399154	35399153	rs1516988:35479735:T:C	35458187	35458187	0	8.56248e-13	0.190953	0.0244121	TRUE	72113	Distal non-mGene mQTLs
cg00782718	chr11	35403145	35403144	rs1516988:35479735:T:C	35458187	35458187	0	5.66758e-10	0.125629	0.0189462	FALSE	72113	Distal non-mGene mQTLs
cg08005462	chr11	35420553	35420552	rs1516988:35479735:T:C	35458187	35458187	0	1.37345e-06	0.137675	0.0273618	TRUE	72113	Distal non-mGene mQTLs
cg16800168	chr11	35420679	35420678	rs1516988:35479735:T:C	35458187	35458187	0	6.83572e-18	0.236116	0.0240376	FALSE	72113	Distal non-mGene mQTLs
cg19878200	chr11	35390191	35390190	rs7949277:35495129:C:G	35473581	35473581	0	3.78887e-07	0.225964	0.0425127	FALSE	56719	Distal non-mGene mQTLs
cg12387754	chr11	35969660	35969659	rs7102966:35991065:G:A	35969515	35969515	0	1.34819e-23	0.307584	0.0256989	FALSE	-25534	Distal mGene mQTLs
cg03818576	chr11	40291111	40291110	rs998447	40289239	40289239	0	1.22557e-16	-0.245038	0.0262292	FALSE	1170534	Distal mGene mQTLs
cg24873388	chr11	43311953	43311952	rs2279660:43333476:G:T	43311926	43311926	0	7.30531e-09	0.198464	0.0323606	FALSE	37	Promoter mGene mQTLs
cg21428460	chr11	43941818	43941817	rs374997881:43963422:ATTGTTG:A	43941872	43941878	0	2.15144e-16	-0.273084	0.0295296	TRUE	-16530	Distal mGene mQTLs
cg05234568	chr11	43997212	43997211	rs2863036:44018804:C:G	43997254	43997254	0	6.029e-08	-0.129417	0.0226871	TRUE	-76195	Distal non-mGene mQTLs
cg18265608	chr11	44065818	44065817	rs2074038:44087989:G:T	44066439	44066439	0	2.04147e-21	-0.577854	0.0518099	FALSE	-514	Promoter mGene mQTLs
cg09339476	chr11	44065847	44065846	rs2074038:44087989:G:T	44066439	44066439	0	5.96752e-30	-0.815106	0.0567878	FALSE	-514	Promoter mGene mQTLs
cg20240860	chr11	44065874	44065873	rs2074038:44087989:G:T	44066439	44066439	0	3.46129e-32	-0.771062	0.0507089	FALSE	-514	Promoter mGene mQTLs
cg12867237	chr11	44065991	44065990	rs2074038:44087989:G:T	44066439	44066439	0	2.56138e-19	-0.744323	0.0718175	FALSE	-514	Promoter mGene mQTLs
cg12287025	chr11	44066056	44066055	rs2074038:44087989:G:T	44066439	44066439	0	7.52893e-16	-0.602069	0.0666234	TRUE	-514	Promoter mGene mQTLs
cg11200965	chr11	44066067	44066066	rs2074038:44087989:G:T	44066439	44066439	0	2.7881e-17	-0.571767	0.0596251	TRUE	-514	Promoter mGene mQTLs
cg16963683	chr11	44066135	44066134	rs2074038:44087989:G:T	44066439	44066439	0	6.87245e-21	-0.632951	0.0577739	FALSE	-514	Promoter mGene mQTLs
cg10598066	chr11	44066259	44066258	rs2074038:44087989:G:T	44066439	44066439	0	2.25028e-10	-0.666694	0.0979572	TRUE	-514	Promoter mGene mQTLs
cg16512570	chr11	44066318	44066317	rs2074038:44087989:G:T	44066439	44066439	0	8.07972e-16	-0.470038	0.052082	FALSE	-514	Promoter mGene mQTLs
cg08632680	chr11	44066519	44066518	rs2074038:44087989:G:T	44066439	44066439	0	6.08256e-11	-0.585868	0.0830972	TRUE	-514	Promoter mGene mQTLs
cg15894661	chr11	44066575	44066574	rs2074038:44087989:G:T	44066439	44066439	0	1.93045e-20	-0.474878	0.0440224	FALSE	-514	Promoter mGene mQTLs
cg00452199	chr11	44066708	44066707	rs2074038:44087989:G:T	44066439	44066439	0	1.0787e-33	-0.971119	0.0615198	FALSE	-514	Promoter mGene mQTLs
cg04074835	chr11	44066955	44066954	rs2074038:44087989:G:T	44066439	44066439	0	1.35985e-24	-0.553145	0.0448221	TRUE	-514	Promoter mGene mQTLs
cg10374499	chr11	44579848	44579847	rs55954253:44601286:G:A	44579736	44579736	0	2.06728e-09	0.183653	0.0287797	FALSE	-15309	Distal mGene mQTLs
cg03540344	chr11	44584830	44584829	rs55954253:44601286:G:A	44579736	44579736	0	6.04616e-09	0.174167	0.0282259	FALSE	-15309	Distal mGene mQTLs
cg16529912	chr11	44798297	44798296	rs835855	44798449	44798449	0	1.25056e-31	-1.04108	0.0694413	FALSE	-71984	Distal mGene mQTLs
cg23097878	chr11	45858180	45858179	rs10838524:45870177:A:G	45848626	45848626	0	1.24256e-07	0.101935	0.0183559	FALSE	-1508	Promoter mGene mQTLs
ch.11.939596F	chr11	45860216	45860215	rs141467132:45875196:AC:A	45853645	45853646	0	5.81733e-27	0.392226	0.0296528	FALSE	-6527	Distal mGene mQTLs
cg00837947	chr11	45923240	45923239	rs56148819:45944290:T:C	45922739	45922739	0	5.41299e-16	-0.407185	0.0447822	TRUE	-1118	Promoter non-mGene mQTLs
cg19841283	chr11	45923370	45923369	rs56148819:45944290:T:C	45922739	45922739	0	6.70494e-14	-0.4006	0.0484477	TRUE	-1118	Promoter non-mGene mQTLs
cg23350132	chr11	47274690	47274689	rs10501320	47272248	47272248	0	8.92288e-12	0.217095	0.0293288	FALSE	-3087	Distal mGene mQTLs
cg12841566	chr11	47274767	47274766	rs10501320	47272248	47272248	0	7.65461e-14	0.323925	0.039284	FALSE	-3087	Distal mGene mQTLs
cg20075042	chr11	47275913	47275912	rs10501320	47272248	47272248	0	1.95113e-07	0.137104	0.0251213	FALSE	-3087	Distal mGene mQTLs
cg27221977	chr11	47275929	47275928	rs10501320	47272248	47272248	0	5.31367e-09	0.184146	0.0297199	FALSE	-3087	Distal mGene mQTLs
cg16983008	chr11	47311851	47311850	rs10501320	47272248	47272248	0	8.50082e-07	0.157267	0.0306061	FALSE	-3087	Distal mGene mQTLs
cg04531030	chr11	47408323	47408322	rs2868996:47575370:A:T	47553818	47553818	0	6.67186e-10	0.0791233	0.0119891	TRUE	11751	Distal non-mGene mQTLs
cg22961919	chr11	57514918	57514917	rs2250673:57268170:T:C	57500697	57500697	0	1.77799e-06	-0.533915	0.107351	FALSE	15089	Distal mGene mQTLs
cg02958346	chr11	57658260	57658259	rs11229087:57425699:C:T	57658227	57658227	0	1.66495e-20	0.301676	0.0279037	FALSE	-9235	Distal mGene mQTLs
cg19485859	chr11	57712424	57712423	rs36089922:57438292:AT:A	57670820	57670821	0	1.22515e-11	0.107418	0.0146255	TRUE	-3073	Distal non-mGene mQTLs
cg02635370	chr11	57704486	57704485	rs71061525:57441788:G:GT	57674316	57674316	0	6.62665e-08	-0.146195	0.0257167	TRUE	-6569	Distal non-mGene mQTLs
cg16330477	chr11	60921944	60921943	rs143737511:60674537:T:TTGGCTTCCC	60907065	60907065	0	4.72826e-30	0.372244	0.0258649	FALSE	-477	Promoter non-mGene mQTLs
cg10158843	chr11	61008701	61008700	exm915388	61008737	61008737	0	1.09134e-24	0.264446	0.0213666	FALSE	-37057	Distal mGene mQTLs
cg08354187	chr11	61008928	61008927	rs2074225:60776306:C:T	61008834	61008834	0	3.07333e-13	0.217912	0.0272294	FALSE	-37154	Distal mGene mQTLs
cg05974629	chr11	61125996	61125995	rs74555568:60907886:C:T	61140414	61140414	1	1.74996e-07	-0.95089	0.173494	FALSE	5050	Distal non-mGene mQTLs
cg07179634	chr11	61139111	61139110	rs10792305:60910618:T:C	61143146	61143146	0	5.3019e-10	0.0992047	0.0149326	FALSE	18471	Distal mGene mQTLs
cg02920403	chr11	61141538	61141537	rs614875:60911892:A:G	61144420	61144420	0	9.34254e-22	-0.803623	0.0712399	TRUE	17197	Distal mGene mQTLs
cg09664380	chr11	61146517	61146516	rs614875:60911892:A:G	61144420	61144420	0	3.16294e-15	-0.205213	0.0233368	TRUE	17197	Distal mGene mQTLs
cg13851621	chr11	61126190	61126189	rs519296	61152282	61152282	0	2.74774e-18	-0.261575	0.0262269	FALSE	-6818	Distal non-mGene mQTLs
cg23043946	chr11	61139506	61139505	rs519296	61152282	61152282	0	2.02323e-22	-0.502622	0.0435959	TRUE	9335	Distal mGene mQTLs
cg16674699	chr11	61509845	61509844	rs2924447:61263673:A:G	61496201	61496201	0	1.10757e-07	-0.179607	0.0322023	TRUE	239	Promoter non-mGene mQTLs
cg11730100	chr11	61792823	61792822	rs412334:61560261:C:T	61792789	61792789	0	2.58235e-09	0.110262	0.0173972	FALSE	-152	Promoter mGene mQTLs
cg06573573	chr11	61951501	61951500	rs972355:61717337:G:C	61949865	61949865	0	1.2318e-06	0.192978	0.0381682	FALSE	-44	Promoter mGene mQTLs
cg24690094	chr11	61899422	61899421	rs200389888:61720105:ATT:A	61952633	61952635	0	1.14021e-06	0.120634	0.0237785	TRUE	-2812	Distal non-mGene mQTLs
cg07800325	chr11	61955466	61955465	rs909268:61723703:A:T	61956231	61956231	0	2.55123e-07	-0.165837	0.0307085	FALSE	-6410	Distal mGene mQTLs
cg24944820	chr11	61955906	61955905	rs909268:61723703:A:T	61956231	61956231	0	5.81825e-08	-0.122512	0.021449	FALSE	-6410	Distal mGene mQTLs
cg22892043	chr11	61964459	61964458	rs17156609:61731977:G:A	61964505	61964505	0	1.38538e-07	0.59323	0.107269	FALSE	-14684	Distal mGene mQTLs
cg05871569	chr11	62124460	62124459	rs141157640:61891897:C:CTTGTT	62124425	62124425	0	8.10587e-20	0.843165	0.0799009	FALSE	-452	Promoter mGene mQTLs
cg12316258	chr11	62612945	62612944	rs113222038:62380027:C:T	62612555	62612555	0	1.80968e-11	0.286838	0.0394365	FALSE	210	Promoter mGene mQTLs
cg26852928	chr11	62612642	62612641	rs35210758:62386647:GA:G	62619175	62619176	0	8.36639e-17	0.315864	0.0335809	FALSE	3000	Distal non-mGene mQTLs
cg26363414	chr11	62671186	62671185	exm919160	62666701	62666701	0	1.61812e-17	-0.296318	0.0306118	FALSE	5554	Distal mGene mQTLs
cg10841437	chr11	62667245	62667244	exm919160	62666701	62666701	0	8.14447e-13	-0.239263	0.0305536	FALSE	-1523	Promoter non-mGene mQTLs
cg10424513	chr11	62670144	62670143	exm919160	62666701	62666701	0	4.75091e-09	-0.191567	0.0308075	FALSE	-1523	Promoter non-mGene mQTLs
cg03362483	chr11	62806409	62806408	rs10431144:62598296:A:G	62830824	62830824	0	8.49062e-11	-0.304594	0.0435852	FALSE	1264	Promoter non-mGene mQTLs
cg24065395	chr11	62832774	62832773	rs200865978:62608883:A:AGG	62841411	62841411	0	1.52147e-15	0.465743	0.052226	TRUE	398	Promoter non-mGene mQTLs
cg22078638	chr11	62832785	62832784	rs200865978:62608883:A:AGG	62841411	62841411	0	2.99554e-09	0.274807	0.0435587	TRUE	398	Promoter non-mGene mQTLs
cg19825186	chr11	62855520	62855519	rs200865978:62608883:A:AGG	62841411	62841411	0	5.31451e-12	0.250575	0.0334288	TRUE	398	Promoter non-mGene mQTLs
cg04813074	chr11	62841373	62841372	rs200865978:62608883:A:AGG	62841411	62841411	0	3.3913e-22	0.54383	0.0475159	TRUE	398	Promoter mGene mQTLs
cg07157834	chr11	62855731	62855730	rs17157578:62608968:G:C	62841496	62841496	0	4.8142e-16	0.340834	0.0374035	FALSE	313	Promoter non-mGene mQTLs
cg13459217	chr11	62832759	62832758	rs472539:62609002:C:G	62841530	62841530	0	3.04294e-16	0.371396	0.040415	FALSE	279	Promoter non-mGene mQTLs
cg12345380	chr11	62832975	62832974	rs11337244:62624299:CT:C	62856827	62856828	0	3.76617e-07	-0.203184	0.0382177	TRUE	-2132	Promoter non-mGene mQTLs
cg20978923	chr11	64181717	64181716	rs71045750:63993679:C:CGCGGCGGGGCGG	64226207	64226207	0	2.68517e-16	-0.274928	0.0298491	TRUE	-266	Promoter non-mGene mQTLs
cg23760581	chr11	64247982	64247981	rs34358026:64015422:T:C	64247950	64247950	0	2.22556e-09	-0.107509	0.0168855	FALSE	-1009	Promoter mGene mQTLs
cg17589175	chr11	64317866	64317865	rs28364831:64085148:A:C	64317676	64317676	0	6.62092e-12	0.113366	0.0152045	FALSE	412	Promoter mGene mQTLs
cg22916017	chr11	64343260	64343259	rs11601860:64110422:A:T	64342950	64342950	0	2.61017e-16	0.195507	0.0212154	FALSE	-2727	Distal mGene mQTLs
cg20601412	chr11	64174413	64174412	rs500265:64126040:A:C	64358568	64358568	0	6.53683e-07	0.163932	0.0315479	TRUE	580	Promoter non-mGene mQTLs
cg08106066	chr11	64448909	64448908	rs894462:64216418:G:C	64448946	64448946	0	4.22102e-15	0.720314	0.0823746	FALSE	128	Promoter non-mGene mQTLs
cg07026666	chr11	64988911	64988910	11:64490422:GCC:G	64722950	64722952	0	9.14154e-07	-0.15388	0.030041	TRUE	238	Promoter non-mGene mQTLs
cg09503975	chr11	64778753	64778752	rs593394:64546991:C:T	64779519	64779519	0	4.22062e-14	0.153712	0.018411	FALSE	-733	Promoter mGene mQTLs
cg22955181	chr11	65040612	65040611	rs2458298:64814813:T:G	65047341	65047341	0	2.22177e-08	0.209386	0.0354333	FALSE	11208	Distal non-mGene mQTLs
cg21152694	chr11	65117942	65117941	rs10501396:64885445:C:A	65117973	65117973	0	4.57034e-22	0.276289	0.0242428	FALSE	-265	Promoter mGene mQTLs
cg13134475	chr11	64449102	64449101	rs116964987:65029979:G:T	65262508	65262508	0	2.73911e-09	0.386041	0.0610206	TRUE	-746	Promoter non-mGene mQTLs
cg16317318	chr11	65322130	65322129	rs4149843:65089459:G:A	65321988	65321988	0	7.87556e-10	0.535924	0.0815983	TRUE	-7170	Distal mGene mQTLs
cg07670188	chr11	65261954	65261953	rs525141:65089792:G:C	65322321	65322321	0	3.17066e-08	-0.116324	0.0199295	FALSE	-7503	Distal non-mGene mQTLs
cg16555856	chr11	65355787	65355786	rs77130160:65122694:C:T	65355223	65355223	0	1.09691e-19	-0.654089	0.0622758	FALSE	-456	Promoter mGene mQTLs
cg16417374	chr11	65786705	65786704	rs143489438:65149861:G:A	65382390	65382390	0	8.49718e-07	-0.992685	0.193185	TRUE	1311	Promoter non-mGene mQTLs
cg07167872	chr11	65488919	65488918	rs115495487:65255304:C:T	65487833	65487833	0	3.88865e-14	-0.506591	0.0605744	TRUE	303	Promoter non-mGene mQTLs
cg07873178	chr11	65540146	65540145	exm926851	65552280	65552280	0	1.83515e-08	0.947003	0.159212	TRUE	6650	Distal mGene mQTLs
cg11065363	chr11	65570257	65570256	rs12270054:65322548:C:T	65555077	65555077	0	2.53706e-16	-0.615383	0.0667434	FALSE	3853	Distal non-mGene mQTLs
cg16996144	chr11	65574732	65574731	rs11227223:65324276:C:T	65556805	65556805	0	1.06408e-06	0.236668	0.0465093	FALSE	2125	Promoter non-mGene mQTLs
cg02809401	chr11	65558738	65558737	rs12790095:65326086:T:G	65558615	65558615	0	3.61651e-10	0.157129	0.0233953	TRUE	315	Promoter mGene mQTLs
cg14914204	chr11	65558781	65558780	rs12790095:65326086:T:G	65558615	65558615	0	1.13104e-07	0.129544	0.0232447	TRUE	315	Promoter mGene mQTLs
cg17480646	chr11	65637996	65637995	rs2306363:65405600:G:T	65638129	65638129	0	3.11161e-12	0.315733	0.0415873	FALSE	-32	Promoter mGene mQTLs
cg00083072	chr11	65647720	65647719	rs2306363:65405600:G:T	65638129	65638129	0	6.1789e-07	-0.146107	0.0280508	FALSE	-32	Promoter mGene mQTLs
cg20450318	chr11	65647790	65647789	rs2306363:65405600:G:T	65638129	65638129	0	7.11948e-16	-0.351137	0.0388154	FALSE	-32	Promoter mGene mQTLs
cg01685242	chr11	65638290	65638289	rs4930156:65405699:C:T	65638228	65638228	0	2.69446e-12	-0.216572	0.0284296	FALSE	-131	Promoter mGene mQTLs
cg01162064	chr11	65663275	65663274	rs74712780:65430730:C:A	65663259	65663259	0	2.67879e-09	0.292354	0.0461799	TRUE	-165	Promoter mGene mQTLs
cg22614927	chr11	65797231	65797230	rs12146493:65547333:G:A	65779862	65779862	0	9.69578e-07	0.140684	0.0275349	FALSE	940	Promoter non-mGene mQTLs
cg06291348	chr11	65879800	65879799	rs17854357:65601560:G:C	65834089	65834089	0	1.14678e-11	0.160899	0.0218716	FALSE	-448	Promoter non-mGene mQTLs
cg04055107	chr11	65859264	65859263	rs1939212:65626701:C:T	65859230	65859230	0	3.12568e-29	0.410239	0.0291333	FALSE	-2104	Promoter mGene mQTLs
cg00576331	chr11	65873046	65873045	rs2234458:65639374:C:T	65871903	65871903	0	6.37216e-12	0.184333	0.0246995	FALSE	1689	Promoter mGene mQTLs
cg07814555	chr11	66126993	66126992	rs2430979	66045912	66045912	0	2.11378e-12	-0.271475	0.0354348	FALSE	3268	Distal non-mGene mQTLs
cg06569300	chr11	66049515	66049514	rs2430978:65816656:G:C	66049185	66049185	0	1.28457e-15	0.123223	0.0137732	FALSE	-5	Promoter mGene mQTLs
cg01234251	chr11	66278090	66278089	rs72936672:65992688:C:A	66225217	66225217	0	2.83926e-14	0.206605	0.0245448	FALSE	-154854	Distal non-mGene mQTLs
cg15165399	chr11	66268159	66268158	rs10791865:66035608:A:C	66268137	66268137	0	1.26873e-15	0.153931	0.0172017	FALSE	396	Promoter mGene mQTLs
cg16950941	chr11	66268169	66268168	rs10791865:66035608:A:C	66268137	66268137	0	6.56881e-12	0.178836	0.0239805	FALSE	396	Promoter mGene mQTLs
cg10204807	chr11	66277636	66277635	rs3132851:66056142:A:C	66288671	66288671	0	6.00533e-08	0.14762	0.0258745	FALSE	499	Promoter non-mGene mQTLs
cg04205689	chr11	66311670	66311669	rs61891388:66079818:T:G	66312347	66312347	0	1.11653e-08	-0.18108	0.0299397	FALSE	506	Promoter non-mGene mQTLs
cg02900990	chr11	66335916	66335915	rs35962792:66138329:CA:C	66370858	66370859	0	7.17771e-07	-0.117421	0.0226868	TRUE	1356	Promoter non-mGene mQTLs
cg11169640	chr11	66336134	66336133	rs35962792:66138329:CA:C	66370858	66370859	0	6.51388e-07	-0.1752	0.0337113	TRUE	1356	Promoter non-mGene mQTLs
cg16909570	chr11	66372399	66372398	rs72557994:66139640:G:C	66372169	66372169	0	7.56969e-08	-0.440069	0.0777904	FALSE	45	Promoter mGene mQTLs
cg25835307	chr11	66466482	66466481	rs75546553:66258916:G:A	66491445	66491445	0	8.97504e-32	-0.430629	0.0286184	FALSE	-11432	Distal non-mGene mQTLs
cg14884203	chr11	66557060	66557059	rs59431265:66361703:G:A	66594232	66594232	0	4.71116e-15	-0.240506	0.0275632	FALSE	-1411	Promoter non-mGene mQTLs
cg19079605	chr11	67044792	67044791	rs145144780:66623119:C:T	66855648	66855648	0	1.1989e-06	0.605284	0.119573	TRUE	999	Promoter non-mGene mQTLs
cg11525980	chr11	66883045	66883044	rs117303800:66650531:A:T	66883060	66883060	0	7.76476e-09	-0.159108	0.0259948	FALSE	75316	Distal mGene mQTLs
cg20601481	chr11	67288316	67288315	rs112895629:67056640:C:A	67289169	67289169	0	2.20583e-08	-0.251005	0.0424658	TRUE	-622	Promoter mGene mQTLs
cg09489048	chr11	67402317	67402316	rs7480390:67169599:C:G	67402128	67402128	0	6.8896e-17	-0.291736	0.0309091	FALSE	19055	Distal mGene mQTLs
cg13055001	chr11	67402343	67402342	rs7480390:67169599:C:G	67402128	67402128	0	2.54778e-11	-0.285976	0.0396594	FALSE	19055	Distal mGene mQTLs
cg11927626	chr11	67584316	67584315	rs12794995:67372946:G:A	67605475	67605475	0	2.69116e-13	0.219484	0.0273461	FALSE	46	Promoter non-mGene mQTLs
cg20362170	chr11	67604973	67604972	rs12794995:67372946:G:A	67605475	67605475	0	5.08771e-25	0.505868	0.040468	FALSE	1231	Promoter mGene mQTLs
cg03603279	chr11	67605987	67605986	rs12794995:67372946:G:A	67605475	67605475	0	2.93998e-15	0.205019	0.0232818	FALSE	1377	Promoter mGene mQTLs
cg02412072	chr11	67616075	67616074	rs60774377:67382226:T:C	67614755	67614755	0	1.42348e-17	-0.307525	0.0316999	FALSE	1502	Promoter non-mGene mQTLs
cg21024022	chr11	67616192	67616191	rs60774377:67382226:T:C	67614755	67614755	0	1.07114e-20	-0.370884	0.0340783	FALSE	1502	Promoter non-mGene mQTLs
cg03530994	chr11	67616332	67616331	rs60774377:67382226:T:C	67614755	67614755	0	9.23058e-16	-0.400732	0.0445137	FALSE	1502	Promoter non-mGene mQTLs
cg13725898	chr11	67616392	67616391	rs60774377:67382226:T:C	67614755	67614755	0	9.49881e-07	-0.138964	0.027174	FALSE	1502	Promoter non-mGene mQTLs
cg04565008	chr11	67650670	67650669	rs2509718:67418178:T:C	67650707	67650707	0	6.24074e-11	-0.185476	0.026325	FALSE	-48	Promoter mGene mQTLs
cg00350199	chr11	67650743	67650742	rs2509718:67418178:T:C	67650707	67650707	0	1.25789e-19	-0.255392	0.0243679	FALSE	-48	Promoter mGene mQTLs
cg10495115	chr11	68030207	68030206	rs10896288:67797705:C:G	68030238	68030238	0	5.08234e-13	0.138223	0.017465	FALSE	379	Promoter mGene mQTLs
cg04876069	chr11	68209487	68209486	rs7118045:67978734:C:G	68211267	68211267	0	1.02575e-10	-0.136393	0.0196157	FALSE	2561	Distal non-mGene mQTLs
cg15450098	chr11	68214278	68214277	rs10896304:67981714:T:G	68214247	68214247	0	1.22634e-15	0.113548	0.0126807	FALSE	-419	Promoter non-mGene mQTLs
cg22501824	chr11	68469477	68469476	rs624970:68231455:A:T	68463987	68463987	0	4.14401e-08	-0.263368	0.0455506	FALSE	-3256	Distal mGene mQTLs
cg08205993	chr11	68665668	68665667	rs7101947:68452128:C:T	68684660	68684660	0	1.04599e-08	-0.167807	0.0276852	FALSE	-881	Promoter non-mGene mQTLs
cg25100952	chr11	68727936	68727935	rs10750832	68710739	68710739	0	9.89695e-32	-0.761847	0.0506849	FALSE	40825	Distal non-mGene mQTLs
cg22911054	chr11	68835912	68835911	rs11228377:68603346:T:C	68835878	68835878	0	1.04818e-07	0.177078	0.031683	TRUE	8532	Distal mGene mQTLs
cg15485101	chr11	68994776	68994775	rs150561761:68604318:G:GGGAA	68836850	68836850	0	7.74413e-08	0.193802	0.0342869	TRUE	7560	Distal non-mGene mQTLs
cg27081634	chr11	69011278	69011277	rs35278146:68778812:C:T	69011344	69011344	0	5.01105e-08	0.122354	0.0213061	FALSE	2065	Promoter mGene mQTLs
cg06092702	chr11	69443467	69443466	rs7928827:69258074:A:G	69443306	69443306	0	2.60675e-08	0.15099	0.0256926	TRUE	1437	Promoter non-mGene mQTLs
cg23683010	chr11	69636348	69636347	rs586459:69461374:G:C	69646606	69646606	0	2.63441e-17	-0.21774	0.0226841	FALSE	-5519	Distal non-mGene mQTLs
cg27422467	chr11	69667337	69667336	rs1789164:69489163:C:G	69674395	69674395	0	1.48769e-07	-0.17526	0.0317774	FALSE	1021	Promoter mGene mQTLs
cg22358066	chr11	69646241	69646240	rs117949036:69489199:A:T	69674431	69674431	0	1.18485e-11	-0.2767	0.0376432	FALSE	985	Promoter non-mGene mQTLs
cg08240807	chr11	72227790	72227789	rs4329713:71934703:C:T	72223659	72223659	0	9.8458e-10	0.181756	0.0278556	FALSE	42	Promoter mGene mQTLs
cg12536891	chr11	72333786	72333785	rs117703155:72146430:C:T	72435386	72435386	1	3.10021e-10	1.13264	0.167911	TRUE	-706	Promoter mGene mQTLs
cg26534807	chr11	72590192	72590191	rs429075:72302191:C:G	72591147	72591147	0	1.07928e-07	-0.107786	0.0193065	FALSE	83444	Distal mGene mQTLs
cg16168406	chr11	72703409	72703408	rs11605042:72411664:G:A	72700619	72700619	0	1.76865e-14	0.318648	0.0374923	FALSE	92980	Distal mGene mQTLs
cg08167047	chr11	72752374	72752373	rs77756118:72428038:T:G	72716993	72716993	0	5.48652e-08	0.426353	0.0744858	TRUE	76606	Distal mGene mQTLs
cg01430283	chr11	73654415	73654414	rs622833	73654459	73654459	0	2.93768e-11	-0.205876	0.0286549	FALSE	-8281	Distal mGene mQTLs
cg21360465	chr11	74171053	74171052	rs658126	74388847	74388847	0	4.91137e-16	-0.390128	0.0428289	TRUE	9626	Distal non-mGene mQTLs
cg11417029	chr11	74493943	74493942	rs1787102:74206406:G:A	74495361	74495361	0	9.76948e-22	0.5447	0.0483179	FALSE	-1628	Promoter mGene mQTLs
cg20145276	chr11	74748678	74748677	rs495718:74459765:G:A	74748720	74748720	0	1.77519e-16	0.653444	0.0704137	FALSE	148	Promoter mGene mQTLs
cg19644997	chr11	75443157	75443156	rs1790160:75180228:T:C	75469183	75469183	0	4.08302e-07	0.0959882	0.0181144	TRUE	56720	Distal mGene mQTLs
cg12318269	chr11	75525737	75525736	rs1790305:75232607:T:C	75521562	75521562	0	3.60906e-18	0.282385	0.028442	FALSE	4341	Distal mGene mQTLs
cg06751802	chr11	77066483	77066482	rs10533846:76777804:CAG:C	77066757	77066759	0	1.28453e-18	-0.226312	0.0224094	TRUE	175	Promoter mGene mQTLs
cg04271412	chr11	77073857	77073856	rs7122016:76784805:G:C	77073759	77073759	0	2.28749e-08	0.150485	0.0254913	FALSE	-6827	Distal mGene mQTLs
cg08294946	chr11	77127515	77127514	rs7104633:76840566:G:C	77129520	77129520	0	6.28078e-08	0.508171	0.0892165	FALSE	-1256	Promoter mGene mQTLs
cg03991848	chr11	77127453	77127452	rs7121629	77129752	77129752	0	2.63222e-12	0.306187	0.0401713	FALSE	-1488	Promoter mGene mQTLs
cg17441778	chr11	77127632	77127631	rs7121629	77129752	77129752	0	6.75504e-07	0.210849	0.0406332	TRUE	-1488	Promoter mGene mQTLs
cg02420069	chr11	77127704	77127703	rs7116928:76840972:C:T	77129926	77129926	0	3.59846e-08	0.243619	0.0419248	FALSE	-1662	Promoter mGene mQTLs
cg02174203	chr11	77137009	77137008	rs948969	77136989	77136989	0	1.99414e-10	-0.139869	0.0204824	FALSE	-8725	Distal mGene mQTLs
cg04518186	chr11	77588918	77588917	11:77300817:C:CCG	77589772	77589772	0	1.85977e-15	0.459122	0.0516809	FALSE	-381	Promoter mGene mQTLs
cg01135259	chr11	77589195	77589194	rs11237249:77341135:G:A	77630090	77630090	0	2.5762e-13	0.361352	0.0449788	FALSE	7715	Distal non-mGene mQTLs
cg15017982	chr11	78187740	78187739	rs492065:77831471:T:A	78120425	78120425	0	5.36341e-08	0.153961	0.0268757	FALSE	19235	Distal non-mGene mQTLs
cg15394860	chr11	78416573	78416572	rs492065:77831471:T:A	78120425	78120425	0	2.30552e-22	0.429566	0.0373279	FALSE	19235	Distal non-mGene mQTLs
cg27205649	chr11	78574790	78574789	rs10736814:78286462:C:G	78575417	78575417	0	2.88674e-10	0.2986	0.0441784	FALSE	-543	Promoter mGene mQTLs
cg21497443	chr11	79237147	79237146	rs581842:78948173:A:C	79237128	79237128	0	6.00913e-07	-0.196041	0.0375933	FALSE	203820	Distal mGene mQTLs
cg18407818	chr11	83071605	83071604	rs35287388:82784147:G:A	83073105	83073105	0	3.43996e-23	0.194766	0.0164822	FALSE	-1039	Promoter mGene mQTLs
cg26314055	chr11	83194787	83194786	rs11233494:82870156:A:G	83159114	83159114	0	2.40844e-09	0.201559	0.0317338	FALSE	-2126	Promoter non-mGene mQTLs
cg02707033	chr11	84923185	84923184	rs146213168:84634457:C:T	84923413	84923413	0	3.14709e-10	0.560801	0.0831725	TRUE	704509	Distal mGene mQTLs
cg17178900	chr11	85682723	85682722	rs67548020:85393656:CA:C	85682612	85682613	0	5.24188e-10	0.275484	0.0414531	FALSE	296	Promoter non-mGene mQTLs
cg27051290	chr11	85810797	85810796	rs2044391:85521829:C:G	85810786	85810786	0	2.34123e-08	0.161292	0.0273438	FALSE	373	Promoter mGene mQTLs
cg06177974	chr11	85811258	85811257	rs2044392:85522332:G:A	85811289	85811289	0	8.28164e-12	0.147599	0.0199038	FALSE	-130	Promoter mGene mQTLs
cg22052467	chr11	86498521	86498520	rs56307437:86209612:G:A	86498570	86498570	0	8.52675e-26	0.74955	0.058602	FALSE	174066	Distal mGene mQTLs
cg10998440	chr11	86498597	86498596	rs56307437:86209612:G:A	86498570	86498570	0	5.11445e-22	0.648677	0.0570093	FALSE	174066	Distal mGene mQTLs
cg03955932	chr11	86672837	86672836	rs10583492:86383632:ACT:A	86672590	86672592	0	1.55714e-07	-0.286379	0.0520161	FALSE	46	Promoter mGene mQTLs
cg09416908	chr11	86673629	86673628	rs670736:86383679:G:A	86672637	86672637	0	2.86076e-07	0.217381	0.0404369	FALSE	-1	Promoter mGene mQTLs
cg05047319	chr11	87037620	87037619	rs117417096:86748652:C:A	87037610	87037610	0	5.61842e-16	-0.367217	0.0404144	TRUE	234	Promoter mGene mQTLs
cg12391538	chr11	88338242	88338241	rs3758833:88071656:G:A	88338488	88338488	0	5.61853e-11	0.310998	0.0440189	FALSE	-701	Promoter mGene mQTLs
cg26811159	chr11	89490814	89490813	rs10830279:89224326:G:A	89491158	89491158	0	1.8253e-17	0.333542	0.0345287	FALSE	7029	Distal mGene mQTLs
cg13040016	chr11	89491115	89491114	rs10830279:89224326:G:A	89491158	89491158	0	2.45451e-13	0.201935	0.025109	FALSE	7029	Distal mGene mQTLs
cg03793270	chr11	89491517	89491516	rs2289123:89224718:G:T	89491550	89491550	0	9.2811e-12	0.283347	0.0383162	FALSE	6637	Distal mGene mQTLs
cg26028595	chr11	90223406	90223405	rs3824897	90221753	90221753	0	5.33847e-20	0.22753	0.0214227	FALSE	1611	Promoter mGene mQTLs
cg26138821	chr11	90223537	90223536	rs3824897	90221753	90221753	0	1.84469e-28	0.534943	0.0387905	FALSE	1611	Promoter mGene mQTLs
cg22332266	chr11	90223610	90223609	rs3824897	90221753	90221753	0	3.46663e-31	0.737577	0.0497582	FALSE	1611	Promoter mGene mQTLs
cg04351018	chr11	90223639	90223638	rs3824897	90221753	90221753	0	5.31672e-22	0.409578	0.0360159	FALSE	1611	Promoter mGene mQTLs
cg26834418	chr11	90223866	90223865	rs3824897	90221753	90221753	0	2.89789e-34	0.723255	0.0451848	FALSE	1611	Promoter mGene mQTLs
cg05067963	chr11	90224000	90223999	rs3824897	90221753	90221753	0	2.49839e-34	0.71457	0.0445726	FALSE	1611	Promoter mGene mQTLs
cg13155023	chr11	90639427	90639426	rs7931571:90378690:A:G	90645522	90645522	0	2.49633e-11	-0.189045	0.0262033	FALSE	-394290	Distal mGene mQTLs
cg01968256	chr11	93850772	93850771	rs10831106:93583790:T:G	93850624	93850624	0	1.80012e-14	0.190803	0.0224581	FALSE	-93	Promoter non-mGene mQTLs
cg07355757	chr11	93849834	93849833	rs11020545:93584075:T:A	93850909	93850909	0	2.09903e-14	0.169679	0.0200341	FALSE	-378	Promoter non-mGene mQTLs
cg05543025	chr11	94141924	94141923	rs4753544:93874866:A:G	94141700	94141700	0	2.52068e-21	-0.53016	0.0476804	FALSE	-12772	Distal mGene mQTLs
cg01783960	chr11	94401281	94401280	rs118104321:94245693:G:A	94512527	94512527	0	3.84886e-11	-0.66301	0.0929241	TRUE	-95	Promoter non-mGene mQTLs
cg21476494	chr11	94545438	94545437	rs7938671:94333958:T:C	94600792	94600792	0	5.7217e-10	-0.495887	0.0748059	TRUE	-56952	Distal non-mGene mQTLs
cg24807394	chr11	95232599	95232598	rs10831321:94964343:A:G	95231179	95231179	0	4.25214e-08	-0.118802	0.0205662	TRUE	1362	Promoter non-mGene mQTLs
cg25225829	chr11	100817078	100817077	rs680604:100687641:A:C	100816910	100816910	0	1.57204e-07	0.109721	0.0199364	TRUE	-129257	Distal mGene mQTLs
cg21913974	chr11	106077372	106077371	rs4565867:105948113:G:A	106077386	106077386	0	8.86931e-08	0.119309	0.0212142	FALSE	379	Promoter mGene mQTLs
cg26898087	chr11	107017574	107017573	rs1840570:106888359:A:G	107017633	107017633	0	1.32839e-09	-0.141485	0.0218775	FALSE	891	Promoter mGene mQTLs
cg14167139	chr11	108498680	108498679	rs74822968:108369173:G:A	108498446	108498446	0	1.09666e-23	0.517968	0.043156	FALSE	-14	Promoter mGene mQTLs
cg14152222	chr11	108632702	108632701	rs111587278:108770839:C:CA	108900112	108900112	0	2.13572e-07	0.346594	0.0637309	TRUE	-235087	Distal non-mGene mQTLs
cg24508561	chr11	110295881	110295880	rs1676535	110295406	110295406	0	2.75684e-24	0.327336	0.0267732	FALSE	1316	Promoter mGene mQTLs
cg08942371	chr11	110692104	110692103	rs11213539:110562899:T:C	110692176	110692176	0	8.75171e-08	0.338336	0.0601292	TRUE	21013	Distal mGene mQTLs
cg10877130	chr11	111436707	111436706	rs11603094:111307696:C:T	111436971	111436971	0	3.49494e-08	0.124214	0.0213542	FALSE	18659	Distal non-mGene mQTLs
cg24668836	chr11	111541448	111541447	rs11213936:111412677:C:G	111541952	111541952	0	1.25688e-09	-0.238648	0.0368407	FALSE	-1672	Promoter mGene mQTLs
cg06578825	chr11	111929831	111929830	rs117262879:111606974:A:G	111736250	111736250	0	3.05759e-09	-0.954408	0.151376	TRUE	-133859	Distal non-mGene mQTLs
cg18672335	chr11	111763598	111763597	rs7106104:111635655:T:C	111764931	111764931	0	1.82771e-15	-0.26483	0.0298005	FALSE	1496	Promoter mGene mQTLs
cg17976121	chr11	111715215	111715214	rs78041974:111780083:C:A	111909359	111909359	0	1.23746e-13	-1.03493	0.126797	TRUE	14363	Distal non-mGene mQTLs
cg14637111	chr11	112499555	112499554	11:111817764:GT:G	111947040	111947041	0	7.87612e-07	0.440691	0.0854833	TRUE	-19896	Distal non-mGene mQTLs
cg17258765	chr11	111735508	111735507	rs60060685:111943618:A:C	112072894	112072894	0	2.98492e-10	0.609317	0.0902339	TRUE	1192	Promoter non-mGene mQTLs
cg07219264	chr11	112169264	112169263	rs360712:112040027:A:G	112169304	112169304	0	5.99524e-15	-0.310875	0.0357966	FALSE	-1932	Promoter mGene mQTLs
cg09843482	chr11	113114510	113114509	rs1436110:112965769:G:A	113095047	113095047	0	7.23459e-11	0.153229	0.0218329	FALSE	-133800	Distal mGene mQTLs
cg18813128	chr11	115219018	115219017	rs11215424:115087421:A:G	115216701	115216701	0	2.11003e-08	0.229365	0.0387455	FALSE	288256	Distal mGene mQTLs
cg19003301	chr11	115222542	115222541	rs45593334:115089440:A:C	115218720	115218720	0	4.61589e-13	-0.331747	0.0418278	FALSE	286237	Distal mGene mQTLs
cg24709257	chr11	115395637	115395636	rs34396473:115293749:G:GT	115423030	115423030	0	1.00673e-06	-0.134735	0.0264137	TRUE	81927	Distal mGene mQTLs
cg12467833	chr11	115760179	115760178	rs11215642:115501331:C:G	115630613	115630613	0	2.86045e-13	0.228186	0.0284683	FALSE	-3428	Distal non-mGene mQTLs
cg25623977	chr11	115760204	115760203	rs3949060	115630625	115630625	0	5.98297e-09	0.159525	0.0258442	FALSE	-3440	Distal non-mGene mQTLs
cg05163923	chr11	115760172	115760171	rs2515302:115502223:A:G	115631505	115631505	0	2.29156e-10	0.162324	0.0238623	FALSE	-4320	Distal non-mGene mQTLs
cg05963690	chr11	115760383	115760382	rs1618710:115515974:T:A	115645256	115645256	0	6.45574e-10	0.169958	0.0257281	FALSE	-18071	Distal non-mGene mQTLs
cg20608306	chr11	117098975	117098974	rs10892073:116969390:C:T	117098674	117098674	0	4.00257e-24	0.405939	0.0333674	FALSE	-237	Promoter mGene mQTLs
cg10163427	chr11	117099284	117099283	rs10892073:116969390:C:T	117098674	117098674	0	4.99452e-12	0.206452	0.0275014	TRUE	-237	Promoter mGene mQTLs
cg05122696	chr11	117099287	117099286	rs10892073:116969390:C:T	117098674	117098674	0	3.14731e-16	0.282326	0.0307414	TRUE	-237	Promoter mGene mQTLs
cg26976576	chr11	117199331	117199330	rs71466797:117016846:T:G	117146130	117146130	0	7.17926e-09	0.136839	0.0222997	TRUE	-1939	Promoter non-mGene mQTLs
cg10398005	chr11	117144173	117144172	rs71466797:117016846:T:G	117146130	117146130	0	1.84468e-11	0.0890235	0.0122455	TRUE	-1863	Promoter mGene mQTLs
cg21014238	chr11	117144156	117144155	rs78270178:117016848:T:G	117146132	117146132	0	1.16442e-10	0.156301	0.0225556	TRUE	-1865	Promoter mGene mQTLs
cg23435082	chr11	117315757	117315756	rs116987336:117175658:G:A	117304942	117304942	0	1.17848e-08	-0.248034	0.0410835	TRUE	11317	Distal mGene mQTLs
cg11494887	chr11	117330379	117330378	rs484553:117201097:G:T	117330381	117330381	0	1.47141e-07	-0.23547	0.0426765	FALSE	-15824	Distal mGene mQTLs
cg21210690	chr11	117443528	117443527	rs11216394:117315692:A:G	117444976	117444976	0	2.30711e-07	0.0745463	0.0137491	FALSE	372549	Distal mGene mQTLs
cg09519504	chr11	117444044	117444043	rs58248287:117476375:A:G	117605660	117605660	0	1.93095e-12	-0.691729	0.0900991	TRUE	211865	Distal mGene mQTLs
cg00065613	chr11	117619302	117619301	rs4936389:117488717:T:C	117618002	117618002	0	6.00145e-08	-0.114307	0.020035	TRUE	199523	Distal mGene mQTLs
cg10274934	chr11	117663370	117663369	rs7111427:117534083:G:A	117663368	117663368	0	2.33576e-19	-0.311428	0.030005	FALSE	154157	Distal mGene mQTLs
cg01330909	chr11	117713933	117713932	Neandertal_chr11_117597518	117726803	117726803	0	1.40189e-31	1.3841	0.0924382	TRUE	220007	Distal mGene mQTLs
cg12259643	chr11	117730699	117730698	rs4142639:117604493:A:G	117733778	117733778	0	5.71084e-15	-0.363064	0.0417662	FALSE	83747	Distal mGene mQTLs
cg21640587	chr11	117797324	117797323	rs12363806:117658211:G:A	117787496	117787496	0	9.02308e-12	0.144789	0.0195659	FALSE	30029	Distal mGene mQTLs
cg10072921	chr11	117814836	117814835	rs10892172:117672474:C:A	117801759	117801759	0	8.7674e-07	0.1308	0.0254892	TRUE	15766	Distal non-mGene mQTLs
cg21014159	chr11	117797321	117797320	rs12364667:117675286:T:G	117804571	117804571	0	1.3654e-13	0.156596	0.0192263	FALSE	12954	Distal mGene mQTLs
cg11333886	chr11	117797328	117797327	rs12364667:117675286:T:G	117804571	117804571	0	3.90132e-09	0.135735	0.0216932	FALSE	12954	Distal mGene mQTLs
cg18173474	chr11	117817618	117817617	rs610226:117688225:G:C	117817510	117817510	0	5.46202e-11	-0.296641	0.0419558	FALSE	15	Promoter non-mGene mQTLs
cg12689752	chr11	117817621	117817620	rs610226:117688225:G:C	117817510	117817510	0	2.00881e-11	-0.281138	0.0387545	FALSE	15	Promoter non-mGene mQTLs
cg16168311	chr11	117817624	117817623	rs610226:117688225:G:C	117817510	117817510	0	3.9101e-07	-0.179198	0.0337575	FALSE	15	Promoter non-mGene mQTLs
cg09608949	chr11	117877475	117877474	rs543312:117745659:C:T	117874944	117874944	0	7.5774e-07	-0.141277	0.0273591	FALSE	2542	Distal mGene mQTLs
cg22869366	chr11	117877108	117877107	rs35917427:117745817:C:CTG	117875102	117875102	0	5.79298e-09	0.156352	0.025304	TRUE	2384	Promoter mGene mQTLs
cg06554173	chr11	118145533	118145532	rs1715444:118016273:G:T	118145558	118145558	0	2.21573e-11	0.168429	0.0232752	FALSE	7330	Distal mGene mQTLs
cg26487031	chr11	118264087	118264086	rs1624780	118264070	118264070	0	4.42145e-16	-0.189743	0.02079	FALSE	466	Promoter mGene mQTLs
cg04541078	chr11	118572185	118572184	rs150318642:118445473:AT:A	118574758	118574759	0	4.43535e-08	0.203761	0.0353268	TRUE	-2368	Promoter mGene mQTLs
cg04663158	chr11	118919101	118919100	rs11217089:118789878:G:C	118919169	118919169	0	3.41058e-14	0.373851	0.0445815	TRUE	-8461	Distal non-mGene mQTLs
cg13213498	chr11	118998075	118998074	rs4938617:118867695:C:T	118996985	118996985	0	8.3309e-09	0.102521	0.0167882	FALSE	1157	Promoter mGene mQTLs
cg11348760	chr11	119084562	119084561	rs686624:118955509:T:A	119084799	119084799	0	5.64027e-18	0.480962	0.0488058	FALSE	67	Promoter mGene mQTLs
cg26145333	chr11	119088032	119088031	rs17075:118959331:G:A	119088621	119088621	0	2.70243e-07	-0.102586	0.0190395	FALSE	-3755	Distal mGene mQTLs
cg11367048	chr11	119088439	119088438	rs17075:118959331:G:A	119088621	119088621	0	4.15345e-20	-0.394631	0.0370128	FALSE	-3755	Distal mGene mQTLs
cg00383220	chr11	119093171	119093170	rs494048:118961231:T:C	119090521	119090521	0	7.30058e-11	-0.136309	0.0194268	FALSE	-5655	Distal mGene mQTLs
cg12768383	chr11	119096829	119096828	rs640603:118964330:G:A	119093620	119093620	0	3.76808e-07	-0.118503	0.0222902	FALSE	1847	Promoter mGene mQTLs
cg11081247	chr11	119106670	119106669	rs7350:118965048:G:A	119094338	119094338	0	5.0593e-10	0.162019	0.0243548	FALSE	1129	Promoter non-mGene mQTLs
cg06719628	chr11	119169376	119169375	rs626984:119041659:C:T	119170950	119170950	0	1.44148e-10	0.211664	0.0307219	FALSE	-4382	Distal mGene mQTLs
cg18732867	chr11	119170218	119170217	rs626984:119041659:C:T	119170950	119170950	0	5.51145e-20	0.404522	0.0381059	FALSE	-4382	Distal mGene mQTLs
cg06540757	chr11	119170660	119170659	rs626984:119041659:C:T	119170950	119170950	0	7.41891e-10	0.146189	0.0222195	FALSE	-4382	Distal mGene mQTLs
cg02753826	chr11	119171202	119171201	rs626984:119041659:C:T	119170950	119170950	0	4.94584e-18	0.223071	0.0225864	FALSE	-4382	Distal mGene mQTLs
cg15839646	chr11	119171338	119171337	rs626984:119041659:C:T	119170950	119170950	0	1.17461e-06	0.123824	0.0244393	TRUE	-4382	Distal mGene mQTLs
cg17681745	chr11	119364633	119364632	rs573396:119239375:G:A	119368665	119368665	0	5.87571e-09	-0.15722	0.025456	FALSE	13061	Distal mGene mQTLs
cg14154726	chr11	119365009	119365008	rs680268:119239689:C:T	119368979	119368979	0	1.9468e-08	-0.201747	0.0339865	TRUE	12747	Distal mGene mQTLs
cg01451205	chr11	119381501	119381500	rs658654:119248320:C:T	119377610	119377610	0	1.03586e-16	0.27495	0.0293427	FALSE	4116	Distal mGene mQTLs
cg21926750	chr11	119636402	119636401	rs4620730:119507180:C:G	119636470	119636470	0	1.4109e-07	-0.15221	0.0275421	FALSE	-28047	Distal non-mGene mQTLs
cg17459743	chr11	119698742	119698741	rs4936492	119689739	119689739	0	2.33564e-07	-0.119458	0.0220432	FALSE	20181	Distal non-mGene mQTLs
cg09793342	chr11	119725395	119725394	rs10790339:119594525:C:T	119723815	119723815	0	4.30892e-12	0.214081	0.028417	FALSE	-13895	Distal non-mGene mQTLs
cg00397522	chr11	120214438	120214437	rs12808972:120057972:G:A	120187264	120187264	0	3.54575e-09	0.160896	0.0256376	FALSE	-1735	Promoter non-mGene mQTLs
cg03148427	chr11	120240079	120240078	rs10892553:120110775:T:C	120240066	120240066	0	1.2871e-07	0.158405	0.0285628	FALSE	-3426	Distal mGene mQTLs
cg15392029	chr11	120325009	120325008	rs12290699:120195702:T:C	120324993	120324993	0	1.78484e-07	0.142924	0.0260971	FALSE	136	Promoter mGene mQTLs
cg18247436	chr11	120985938	120985937	rs584092	120952687	120952687	0	4.45587e-11	0.573681	0.0807098	FALSE	-440928	Distal mGene mQTLs
cg07849136	chr11	120986415	120986414	rs371012924:120856998:CGGGCGGGGCGGGAG:C	120986289	120986303	0	4.40772e-19	1.2045	0.117227	FALSE	-474530	Distal non-mGene mQTLs
cg13355431	chr11	121463776	121463775	rs57155104:121334553:G:A	121463844	121463844	0	3.34943e-07	0.412498	0.0772202	TRUE	-11641	Distal mGene mQTLs
cg16423756	chr11	122655483	122655482	rs7129071:122527120:G:A	122656412	122656412	0	4.20281e-12	0.141336	0.0187497	FALSE	-737	Promoter mGene mQTLs
cg00277997	chr11	123061649	123061648	rs4935825:122932365:A:C	123061657	123061657	0	3.26633e-18	0.237843	0.023916	TRUE	1573	Promoter mGene mQTLs
cg14103893	chr11	123188232	123188231	rs61904435:123059021:G:A	123188313	123188313	0	4.78282e-14	0.174987	0.0210137	FALSE	6968	Distal mGene mQTLs
cg02380535	chr11	123195545	123195544	rs4488207:123066986:G:T	123196278	123196278	0	7.67575e-08	0.162084	0.028666	FALSE	-997	Promoter non-mGene mQTLs
cg19692784	chr11	123183689	123183688	rs113828677:123279988:T:A	123409280	123409280	0	1.14928e-07	-0.71504	0.128381	TRUE	-50852	Distal non-mGene mQTLs
cg21430680	chr11	123475071	123475070	rs4936820:123394265:C:T	123523557	123523557	0	1.40897e-10	-0.485124	0.0703697	TRUE	-165129	Distal non-mGene mQTLs
cg07579732	chr11	123475270	123475269	rs4936820:123394265:C:T	123523557	123523557	0	5.06268e-11	-0.572365	0.0807926	TRUE	-165129	Distal non-mGene mQTLs
cg15620139	chr11	123480790	123480789	rs4936820:123394265:C:T	123523557	123523557	0	4.96238e-10	-0.613784	0.0922133	TRUE	-165129	Distal non-mGene mQTLs
cg07813377	chr11	123510687	123510686	rs4936820:123394265:C:T	123523557	123523557	0	4.13288e-10	-0.427421	0.0638806	FALSE	-165129	Distal non-mGene mQTLs
cg06979374	chr11	123585387	123585386	rs4936820:123394265:C:T	123523557	123523557	0	9.86937e-08	-0.170985	0.0305239	TRUE	-165129	Distal mGene mQTLs
cg24961445	chr11	123573929	123573928	rs17127435:123395348:A:G	123524640	123524640	0	3.86696e-11	-0.341836	0.0479158	TRUE	-166212	Distal mGene mQTLs
cg09612920	chr11	123568923	123568922	rs2846310:123397869:G:A	123527161	123527161	0	7.44767e-11	0.198	0.0282339	FALSE	-168733	Distal mGene mQTLs
cg12728690	chr11	123575663	123575662	rs2846310:123397869:G:A	123527161	123527161	0	2.30091e-10	0.297212	0.0436962	FALSE	-168733	Distal mGene mQTLs
cg16689797	chr11	123546753	123546752	rs7110875	123528233	123528233	0	5.53319e-07	-0.112012	0.0214057	FALSE	-169805	Distal mGene mQTLs
cg06797734	chr11	123577674	123577673	rs11219187:123399886:T:C	123529178	123529178	0	1.75746e-06	0.113926	0.0228943	FALSE	-170750	Distal mGene mQTLs
cg13364241	chr11	123557089	123557088	rs2714067:123400286:A:G	123529578	123529578	0	4.96015e-08	0.207254	0.0360767	FALSE	-171150	Distal mGene mQTLs
cg26041232	chr11	123577455	123577454	rs2846297:123403104:C:A	123532396	123532396	0	1.45634e-06	-0.122955	0.0245005	FALSE	-173968	Distal mGene mQTLs
cg11059493	chr11	123544056	123544055	rs63564062:123410149:AT:A	123539441	123539442	0	9.48055e-11	0.153967	0.0220965	TRUE	-181013	Distal mGene mQTLs
cg18041960	chr11	123544861	123544860	rs1295755:123412246:A:C	123541538	123541538	0	1.89479e-10	0.143558	0.0209932	FALSE	-183110	Distal mGene mQTLs
cg12548264	chr11	123558817	123558816	rs1296498:123417066:C:T	123546358	123546358	0	5.4441e-08	-0.227524	0.0397384	FALSE	-187930	Distal mGene mQTLs
cg01246664	chr11	123551220	123551219	rs56028970:123421955:T:C	123551247	123551247	0	4.32368e-13	-0.667	0.0839755	FALSE	-192819	Distal mGene mQTLs
cg22338845	chr11	123558835	123558834	rs61129032:123424045:T:TTAACTAATATGTAGAAGGAGACC	123553337	123553337	0	1.24395e-09	-0.184088	0.0284093	TRUE	-194909	Distal mGene mQTLs
cg10227124	chr11	123559130	123559129	rs2003795:123428835:T:G	123558127	123558127	0	9.27011e-17	-0.41903	0.0446304	FALSE	-199699	Distal mGene mQTLs
cg19182986	chr11	124743605	124743604	rs11399333:124610011:C:CG	124740115	124740115	0	1.67704e-08	0.174126	0.029185	FALSE	-269	Promoter mGene mQTLs
cg27414487	chr11	124897825	124897824	rs73016372:124768061:A:G	124898165	124898165	0	1.26625e-11	0.217352	0.029618	FALSE	335	Promoter mGene mQTLs
cg16143578	chr11	124897906	124897905	rs73016372:124768061:A:G	124898165	124898165	0	2.56505e-09	0.231608	0.0365356	FALSE	335	Promoter mGene mQTLs
cg18248499	chr11	124898346	124898345	rs73016372:124768061:A:G	124898165	124898165	0	2.74014e-10	0.292219	0.0431714	FALSE	335	Promoter mGene mQTLs
cg08770647	chr11	124898950	124898949	rs73016372:124768061:A:G	124898165	124898165	0	5.34464e-07	0.179461	0.0342457	TRUE	335	Promoter mGene mQTLs
cg14874299	chr11	125111448	125111447	rs11219906	125112303	125112303	0	1.38091e-07	0.0784848	0.01419	FALSE	-540	Promoter mGene mQTLs
cg18231898	chr11	125374870	125374869	rs12273350	125371150	125371150	0	3.43904e-07	0.129272	0.0242258	TRUE	-206463	Distal mGene mQTLs
cg12577455	chr11	125433355	125433354	rs2555222:125303491:G:A	125433595	125433595	0	8.86031e-12	0.323542	0.043702	FALSE	-268908	Distal mGene mQTLs
cg11137277	chr11	125496372	125496371	rs71475941:126080776:G:A	126210881	126210881	0	1.0256e-07	0.302334	0.05405	TRUE	533	Promoter non-mGene mQTLs
cg04603972	chr11	126290730	126290729	rs35061643:126173603:A:T	126303708	126303708	0	1.15932e-09	-0.169636	0.0261242	FALSE	44	Promoter non-mGene mQTLs
cg19767249	chr11	126303743	126303742	rs3781772:126181185:C:T	126311290	126311290	0	3.42504e-27	0.824011	0.0618925	FALSE	-7538	Distal mGene mQTLs
cg12017702	chr11	126408709	126408708	rs2230279	126408180	126408180	0	2.38242e-13	0.219843	0.0273181	FALSE	-52540	Distal mGene mQTLs
cg23788309	chr11	126411765	126411764	rs4937125:126281620:G:C	126411725	126411725	0	2.46692e-08	0.214365	0.0364069	TRUE	-56085	Distal mGene mQTLs
cg20037145	chr11	126409808	126409807	exm-rs4937126	126412002	126412002	0	1.18297e-08	0.128493	0.0212857	FALSE	-56362	Distal mGene mQTLs
cg12569593	chr11	126543822	126543821	rs78770381:126416991:G:T	126547096	126547096	0	2.16324e-15	0.369453	0.0417078	FALSE	456364	Distal mGene mQTLs
cg03661789	chr11	126356139	126356138	rs537172	126582137	126582137	0	2.38131e-07	0.117743	0.0217433	TRUE	-38190	Distal non-mGene mQTLs
cg18152523	chr11	126356174	126356173	rs537172	126582137	126582137	0	5.88994e-07	0.217829	0.0417365	FALSE	-38190	Distal non-mGene mQTLs
cg00410216	chr11	126543921	126543920	rs537172	126582137	126582137	0	2.45172e-13	0.83378	0.103672	FALSE	421323	Distal mGene mQTLs
cg00396484	chr11	126544613	126544612	rs537172	126582137	126582137	0	4.37661e-08	0.174981	0.0303228	FALSE	421323	Distal mGene mQTLs
cg25993377	chr11	126547412	126547411	rs537172	126582137	126582137	0	1.96471e-08	0.271406	0.0457355	FALSE	421323	Distal mGene mQTLs
cg05422174	chr11	126583787	126583786	rs537172	126582137	126582137	0	2.97608e-18	-0.235738	0.0236677	FALSE	421323	Distal mGene mQTLs
cg15334391	chr11	126583849	126583848	rs537172	126582137	126582137	0	8.56954e-22	-0.365526	0.032363	FALSE	421323	Distal mGene mQTLs
cg06889535	chr11	126585818	126585817	rs537172	126582137	126582137	0	5.12423e-21	-0.417875	0.0379766	FALSE	421323	Distal mGene mQTLs
cg16948827	chr11	126585991	126585990	rs537172	126582137	126582137	0	1.15041e-10	-0.292669	0.042221	FALSE	421323	Distal mGene mQTLs
cg10839291	chr11	126586114	126586113	rs537172	126582137	126582137	0	2.8761e-17	-0.279539	0.0291666	FALSE	421323	Distal mGene mQTLs
cg16628183	chr11	126586158	126586157	rs537172	126582137	126582137	0	3.82616e-17	-0.297695	0.0312159	FALSE	421323	Distal mGene mQTLs
cg21517016	chr11	127002883	127002882	rs494442:126873592:C:T	127003697	127003697	0	1.3159e-18	-0.322173	0.0319142	FALSE	-787	Promoter non-mGene mQTLs
cg07235053	chr11	129589663	129589662	rs35114680:129319307:CAAG:C	129449412	129449415	0	8.44937e-13	-0.175994	0.022493	TRUE	-73472	Distal non-mGene mQTLs
cg15055782	chr11	129440969	129440968	rs35114680:129319307:CAAG:C	129449412	129449415	0	9.2592e-12	0.416048	0.0562578	TRUE	-73472	Distal mGene mQTLs
cg08847885	chr11	130069965	130069964	rs7926547:129938922:C:G	130069027	130069027	0	6.77842e-12	0.27516	0.036925	FALSE	810	Promoter mGene mQTLs
cg14926494	chr11	130894307	130894306	rs75011833:130764418:C:G	130894523	130894523	0	5.31916e-07	0.293304	0.0559586	FALSE	21986	Distal mGene mQTLs
cg23727966	chr11	130890689	130890688	rs7925664:130764526:C:T	130894631	130894631	0	3.0516e-18	0.160928	0.0161636	FALSE	21878	Distal mGene mQTLs
cg23642342	chr11	130916456	130916455	rs3751033:130786345:C:A	130916450	130916450	0	8.81294e-21	0.327782	0.0300301	FALSE	59	Promoter mGene mQTLs
cg12179176	chr11	130916661	130916660	rs3751033:130786345:C:A	130916450	130916450	0	3.45197e-34	0.672691	0.0421034	FALSE	59	Promoter mGene mQTLs
cg05962950	chr11	130916671	130916670	rs3834925:130786592:CA:C	130916697	130916698	0	1.57758e-28	0.974407	0.0705266	FALSE	-188	Promoter mGene mQTLs
cg07296705	chr11	131392689	131392688	rs10791140:131242104:C:T	131372209	131372209	0	6.57409e-10	0.158566	0.0240163	FALSE	-1731	Promoter mGene mQTLs
cg22074083	chr11	131545917	131545916	rs34610016:131370817:AT:A	131500923	131500924	0	3.38311e-07	-0.128798	0.0241209	TRUE	-130445	Distal mGene mQTLs
cg00864721	chr11	131581881	131581880	rs2458764:131451832:A:C	131581938	131581938	0	7.39445e-33	-0.418482	0.0270634	FALSE	-211460	Distal mGene mQTLs
cg18009484	chr11	131760700	131760699	rs10791162:131631904:T:C	131762010	131762010	0	1.77418e-09	-0.160888	0.0250954	FALSE	-391532	Distal mGene mQTLs
cg15277677	chr11	131760755	131760754	rs10791162:131631904:T:C	131762010	131762010	0	1.62375e-12	-0.242489	0.0314581	FALSE	-391532	Distal mGene mQTLs
cg25296357	chr11	132029033	132029032	rs534770:131898713:T:C	132028819	132028819	0	3.00829e-12	-0.209931	0.0276294	FALSE	-658341	Distal mGene mQTLs
cg09515205	chr11	132943677	132943676	rs61909272:132813378:G:C	132943483	132943483	0	2.04184e-10	0.199029	0.0291648	FALSE	589036	Distal mGene mQTLs
cg23151862	chr11	132943468	132943467	rs72653405:132813548:C:T	132943653	132943653	0	3.39551e-09	0.192752	0.030672	FALSE	588866	Distal mGene mQTLs
cg18932983	chr11	132943675	132943674	rs72653405:132813548:C:T	132943653	132943653	0	8.80034e-14	0.163969	0.0199441	FALSE	588866	Distal mGene mQTLs
cg27312388	chr11	132994271	132994270	rs1506881:132864266:G:A	132994371	132994371	0	4.29741e-07	0.150561	0.0284729	FALSE	538148	Distal mGene mQTLs
cg23522601	chr11	133064483	133064482	rs12361143:132934432:G:C	133064537	133064537	0	1.41944e-10	0.331474	0.0480917	TRUE	467982	Distal mGene mQTLs
cg06300469	chr11	133787572	133787571	rs11223586:133657425:C:G	133787530	133787530	0	9.38135e-12	0.174241	0.0235683	FALSE	22846	Distal non-mGene mQTLs
cg18057887	chr11	133931019	133931018	rs11223627:133800769:G:A	133930874	133930874	0	9.21109e-12	-0.219307	0.0296508	FALSE	26111	Distal mGene mQTLs
cg03392386	chr11	133930906	133930905	rs12796441:133800773:C:A	133930878	133930878	0	8.85779e-12	-0.114729	0.0154967	FALSE	26107	Distal mGene mQTLs
cg09112723	chr11	134272760	134272759	rs10894791:134142033:A:G	134272139	134272139	0	1.17822e-10	0.246377	0.0355656	FALSE	2106	Promoter non-mGene mQTLs
cg13942826	chr11	134382911	134382910	rs7112912:134246900:C:T	134377006	134377006	0	6.28734e-08	-0.132285	0.0232253	FALSE	-45132	Distal non-mGene mQTLs
cg18232235	chr11	134762976	134762975	rs10791390:134632224:A:C	134762330	134762330	0	8.18929e-12	0.209168	0.0281988	TRUE	-26734	Distal non-mGene mQTLs
cg17741383	chr11	134762349	134762348	rs10750579:134632225:G:A	134762331	134762331	0	3.39916e-15	0.312129	0.0355449	FALSE	-26735	Distal non-mGene mQTLs
cg08684991	chr11	134762468	134762467	rs10750579:134632225:G:A	134762331	134762331	0	1.15242e-11	0.203002	0.0275981	FALSE	-26735	Distal non-mGene mQTLs
cg13010216	chr12	959027	959026	rs11571383:1058756:T:TC	949590	949590	0	3.18988e-11	-0.43648	0.0608799	TRUE	40463	Distal mGene mQTLs
cg07916784	chr12	1083408	1083407	rs35258043:1202629:G:T	1093463	1093463	0	2.36581e-41	0.901963	0.0478978	FALSE	-102954	Distal mGene mQTLs
cg02508878	chr12	1644737	1644736	rs11061894:1753187:T:C	1644021	1644021	0	7.75956e-13	-0.265928	0.0339215	FALSE	-114130	Distal mGene mQTLs
cg23590207	chr12	1770279	1770278	rs12828908:1879385:A:G	1770219	1770219	0	3.76516e-16	0.267711	0.0292461	TRUE	-81645	Distal mGene mQTLs
cg12384790	chr12	1661617	1661616	rs7980272:1906208:C:T	1797042	1797042	0	5.97815e-09	0.347336	0.0562696	FALSE	121794	Distal non-mGene mQTLs
cg24856673	chr12	1907969	1907968	rs7299904:2000098:T:G	1890932	1890932	0	5.65698e-08	-0.156108	0.027303	FALSE	27904	Distal mGene mQTLs
cg00219585	chr12	2005060	2005059	rs7298333:2113348:A:C	2004182	2004182	0	4.65468e-10	-0.20816	0.0312162	FALSE	353	Promoter mGene mQTLs
cg07179669	chr12	1937003	1937002	rs149400539:2114138:AC:A	2004972	2004973	0	1.08385e-10	-0.203307	0.0292824	TRUE	-437	Promoter non-mGene mQTLs
cg23524436	chr12	2052272	2052271	rs723672:2161561:C:T	2052395	2052395	0	8.90258e-08	0.122686	0.0218176	FALSE	-81609	Distal mGene mQTLs
cg02815776	chr12	3201001	3201000	rs880159	3105399	3105399	0	1.76974e-08	0.188503	0.0316523	FALSE	-28044	Distal mGene mQTLs
cg26107333	chr12	3201104	3201103	rs880159	3105399	3105399	0	3.93952e-10	0.174039	0.0259758	FALSE	-28044	Distal mGene mQTLs
cg18856668	chr12	2927733	2927732	rs118175286:3291921:C:A	3182755	3182755	0	2.6319e-07	0.817415	0.15155	TRUE	-105400	Distal non-mGene mQTLs
cg16924822	chr12	3200099	3200098	rs4765720:3308296:C:G	3199130	3199130	0	1.02394e-07	-0.195024	0.0348634	FALSE	-121775	Distal mGene mQTLs
cg22499099	chr12	3300240	3300239	rs61907519:3430799:C:T	3321633	3321633	0	1.36074e-07	0.152107	0.0274854	TRUE	-2915	Distal non-mGene mQTLs
cg07925738	chr12	4562042	4562041	rs740059:4671490:G:A	4562324	4562324	0	8.05124e-11	0.132902	0.0189904	FALSE	-120	Promoter non-mGene mQTLs
cg09507771	chr12	4562566	4562565	rs740059:4671490:G:A	4562324	4562324	0	1.20016e-14	0.249105	0.0290819	FALSE	-120	Promoter non-mGene mQTLs
cg16064691	chr12	4610346	4610345	rs10492055:4701163:A:G	4591997	4591997	0	2.32046e-08	0.509076	0.0862773	TRUE	-29793	Distal mGene mQTLs
cg13781134	chr12	4605981	4605980	rs12303320:4718125:C:T	4608959	4608959	0	5.52131e-08	0.115444	0.0201732	TRUE	-46755	Distal mGene mQTLs
cg21951301	chr12	5433362	5433361	rs10849268:5542307:C:G	5433141	5433141	0	2.12414e-08	-0.216384	0.0365612	FALSE	-1029	Promoter mGene mQTLs
cg02086166	chr12	5666453	5666452	rs759090:5775664:T:C	5666498	5666498	0	1.78421e-13	0.321321	0.0396783	FALSE	279734	Distal mGene mQTLs
cg04053108	chr12	6056863	6056862	rs73036509:6165814:C:G	6056648	6056648	0	7.42469e-11	-0.160088	0.022826	FALSE	68122	Distal mGene mQTLs
cg14300062	chr12	6471092	6471091	rs2041386:6562538:C:T	6453372	6453372	0	1.21352e-12	0.23473	0.030248	FALSE	-1805	Promoter non-mGene mQTLs
cg07142400	chr12	6493282	6493281	rs9788053:6624435:C:T	6515269	6515269	0	8.33711e-18	0.322285	0.0329202	FALSE	-21913	Distal mGene mQTLs
cg21225563	chr12	6536406	6536405	rs2886093:6645565:T:C	6536399	6536399	0	2.89277e-18	0.252241	0.0253127	FALSE	-2472	Promoter mGene mQTLs
cg25948690	chr12	6582412	6582411	rs11064252:6662744:T:C	6553578	6553578	0	6.02171e-16	0.73721	0.0812388	FALSE	2505	Distal non-mGene mQTLs
cg16579101	chr12	6567993	6567992	rs11064252:6662744:T:C	6553578	6553578	0	1.19229e-08	0.30148	0.0499553	FALSE	15113	Distal mGene mQTLs
cg14371571	chr12	6821448	6821447	rs3741920	6829708	6829708	0	1.48913e-13	0.468534	0.057632	FALSE	-8163	Distal mGene mQTLs
cg17805404	chr12	6821459	6821458	rs3741920	6829708	6829708	0	4.36309e-14	0.458838	0.0549955	FALSE	-8163	Distal mGene mQTLs
cg10970328	chr12	6822360	6822359	rs3741920	6829708	6829708	0	1.16367e-10	0.168284	0.0242845	FALSE	-8163	Distal mGene mQTLs
cg00127414	chr12	6829720	6829719	rs3741920	6829708	6829708	0	7.76409e-16	0.387084	0.0428584	FALSE	-1298	Promoter mGene mQTLs
cg27509891	chr12	6926819	6926818	rs143817017:6942212:G:A	6833048	6833048	0	8.04814e-10	0.458402	0.0698393	TRUE	-4638	Distal non-mGene mQTLs
cg12689055	chr12	6923914	6923913	rs5441:6949026:A:G	6839862	6839862	0	8.42904e-07	0.0909591	0.0176953	TRUE	92	Promoter non-mGene mQTLs
cg17456112	chr12	6869387	6869386	rs12302749	6867132	6867132	0	9.32937e-07	-0.0904994	0.0176832	FALSE	-13	Promoter mGene mQTLs
cg26269324	chr12	6867921	6867920	rs2071069:6979010:G:A	6869846	6869846	0	1.12334e-22	0.1503	0.0129294	FALSE	-2727	Distal mGene mQTLs
cg23616620	chr12	6904657	6904656	rs200627370:7013820:CGA:C	6904656	6904658	0	6.98764e-13	0.668747	0.0851034	TRUE	-31087	Distal mGene mQTLs
cg12119858	chr12	6914032	6914031	rs2071419:7026932:T:C	6917768	6917768	0	2.35949e-07	-0.124119	0.0229123	TRUE	-44199	Distal mGene mQTLs
cg16788860	chr12	6933000	6932999	rs1044189	6943986	6943986	0	1.81516e-13	-0.151986	0.0187749	FALSE	-1008	Promoter non-mGene mQTLs
cg17634520	chr12	6933520	6933519	rs1044189	6943986	6943986	0	9.05386e-09	-0.120642	0.0198094	TRUE	-1008	Promoter non-mGene mQTLs
cg14593550	chr12	6944002	6944001	rs1044189	6943986	6943986	0	1.12216e-13	0.223494	0.0273249	FALSE	-1008	Promoter mGene mQTLs
cg26229977	chr12	6944011	6944010	rs1044189	6943986	6943986	0	4.30959e-17	0.30063	0.0315893	FALSE	-1008	Promoter mGene mQTLs
cg24032056	chr12	7109388	7109387	rs34379050:7266496:C:A	7113900	7113900	0	8.02193e-16	0.340029	0.0376714	FALSE	-5848	Distal non-mGene mQTLs
cg19244639	chr12	7190739	7190738	rs12312641:7340994:G:A	7188398	7188398	0	1.48989e-08	0.364005	0.0607671	TRUE	287	Promoter mGene mQTLs
cg17525411	chr12	7188985	7188984	rs2290241:7341343:G:A	7188747	7188747	0	1.62092e-07	0.16626	0.0302451	FALSE	-62	Promoter mGene mQTLs
cg02215627	chr12	9116070	9116069	rs226379:9268585:T:C	9115989	9115989	0	3.75923e-13	0.388859	0.0488062	FALSE	240	Promoter mGene mQTLs
cg20086047	chr12	9116116	9116115	rs226379:9268585:T:C	9115989	9115989	0	3.03792e-12	0.312167	0.0410944	FALSE	240	Promoter mGene mQTLs
cg07324869	chr12	9116135	9116134	rs226379:9268585:T:C	9115989	9115989	0	5.46567e-13	0.294405	0.0372595	FALSE	240	Promoter mGene mQTLs
cg07347128	chr12	9391734	9391733	rs7960104:9435639:T:C	9283043	9283043	0	5.74583e-10	-0.20201	0.0304775	FALSE	-5808	Distal non-mGene mQTLs
cg04127455	chr12	9647874	9647873	rs35098654:9800589:G:T	9647993	9647993	0	2.56617e-19	0.981404	0.0946957	FALSE	16	Promoter non-mGene mQTLs
cg09359103	chr12	9647748	9647747	rs35015427:9800639:G:C	9648043	9648043	0	8.24906e-22	0.57852	0.0511931	FALSE	-34	Promoter non-mGene mQTLs
cg16680214	chr12	9647949	9647948	rs35015427:9800639:G:C	9648043	9648043	0	3.23191e-21	0.646442	0.0583507	FALSE	-34	Promoter non-mGene mQTLs
cg25208724	chr12	9943304	9943303	rs74065411:10096086:G:C	9943487	9943487	0	2.83704e-16	-0.908193	0.0987021	FALSE	8	Promoter non-mGene mQTLs
cg06970220	chr12	9943520	9943519	rs74065411:10096086:G:C	9943487	9943487	0	4.6513e-16	-1.00333	0.110037	FALSE	8	Promoter non-mGene mQTLs
cg14793287	chr12	10010238	10010237	rs10772223:10154249:T:C	10001650	10001650	0	6.20099e-07	0.159184	0.0305659	FALSE	11774	Distal non-mGene mQTLs
cg18924562	chr12	10090187	10090186	rs10845030:10231335:C:T	10078736	10078736	0	2.8603e-30	0.580812	0.0401261	FALSE	32891	Distal mGene mQTLs
cg16417563	chr12	10212966	10212965	rs2302486:10365574:C:G	10212975	10212975	0	1.42608e-12	0.16099	0.0208227	FALSE	-517	Promoter mGene mQTLs
cg23243991	chr12	10674796	10674795	rs2418097:10827276:G:A	10674677	10674677	0	3.34157e-08	-0.387692	0.0665447	FALSE	-359	Promoter mGene mQTLs
cg03985116	chr12	10710391	10710390	rs12317203:10876059:G:T	10723460	10723460	0	9.93205e-14	0.225868	0.0275435	FALSE	-148	Promoter mGene mQTLs
cg22134853	chr12	10723484	10723483	rs11053915:10876805:G:C	10724206	10724206	0	1.94217e-09	0.0914583	0.0143049	FALSE	-894	Promoter mGene mQTLs
cg09462567	chr12	10717577	10717576	rs7300727:10902579:G:A	10749980	10749980	0	2.68878e-07	0.131763	0.0244498	TRUE	254	Promoter non-mGene mQTLs
cg10697445	chr12	11547388	11547387	rs6488425:11700172:G:T	11547238	11547238	0	4.98814e-30	1.7475	0.121497	TRUE	8600	Distal non-mGene mQTLs
cg26817028	chr12	13101470	13101469	rs189697517:12324193:G:A	12171259	12171259	0	5.89799e-10	1.01363	0.153042	TRUE	-121415	Distal non-mGene mQTLs
cg22144703	chr12	12717772	12717771	NHGRI_notinECorHUNT_chr12_12870695	12717761	12717761	0	6.65143e-11	0.104048	0.0147925	FALSE	-155637	Distal mGene mQTLs
cg02554391	chr12	12718603	12718602	rs3093733:12872484:C:CA	12719550	12719550	0	1.02755e-08	-0.186257	0.0307112	TRUE	-4492	Distal mGene mQTLs
cg11728497	chr12	12718954	12718953	rs3093733:12872484:C:CA	12719550	12719550	0	2.4958e-09	-0.243787	0.0384244	TRUE	-4492	Distal mGene mQTLs
cg04041654	chr12	12718979	12718978	rs77216612:12877983:A:G	12725049	12725049	0	4.5039e-10	-0.256469	0.0384247	FALSE	-1038	Promoter non-mGene mQTLs
cg19767650	chr12	12718991	12718990	rs77216612:12877983:A:G	12725049	12725049	0	9.32946e-08	-0.192678	0.0343243	FALSE	-1038	Promoter non-mGene mQTLs
cg09462578	chr12	12725495	12725494	rs148910232:12878572:CGGCCCCAGCCCCCGCGCCCGCCCGG:C	12725638	12725663	0	2.14775e-28	-0.389426	0.0282896	FALSE	279	Promoter mGene mQTLs
cg04607235	chr12	12725507	12725506	rs11055034	12737692	12737692	0	8.57418e-29	-0.444881	0.0319691	FALSE	-11775	Distal mGene mQTLs
cg27423445	chr12	12726831	12726830	rs11055034	12737692	12737692	0	1.9018e-07	0.153272	0.0280557	FALSE	-11775	Distal mGene mQTLs
cg02301528	chr12	12786586	12786585	rs1548838:12939551:T:G	12786617	12786617	0	1.61422e-10	-0.266821	0.0388474	FALSE	-60700	Distal mGene mQTLs
cg23535137	chr12	12983649	12983648	rs116902872:12944833:G:A	12791899	12791899	0	3.56837e-09	-0.74174	0.118214	TRUE	-65982	Distal non-mGene mQTLs
cg12476585	chr12	13571494	13571493	rs11611794:13691761:C:A	13538827	13538827	0	1.1698e-08	-0.155802	0.0258001	TRUE	443130	Distal mGene mQTLs
cg00355212	chr12	14567596	14567595	exm986866	14567620	14567620	0	1.33347e-10	0.188793	0.0273445	FALSE	130	Promoter mGene mQTLs
cg18341045	chr12	14773830	14773829	rs10846059	14766928	14766928	0	5.41647e-13	0.300087	0.037971	FALSE	1003	Promoter non-mGene mQTLs
cg17246694	chr12	14773976	14773975	rs10846059	14766928	14766928	0	5.63884e-10	0.238062	0.0358973	FALSE	1003	Promoter non-mGene mQTLs
cg06296752	chr12	14774143	14774142	rs10846059	14766928	14766928	0	1.85562e-07	0.235805	0.0431218	TRUE	1003	Promoter non-mGene mQTLs
cg03648020	chr12	14770327	14770326	rs138765803:14923265:G:GC	14770331	14770331	0	2.34647e-14	0.460927	0.0545455	TRUE	-2400	Promoter non-mGene mQTLs
cg22926252	chr12	14803417	14803416	rs3177268	14803426	14803426	0	3.75057e-08	0.113267	0.0195208	FALSE	114	Promoter mGene mQTLs
cg23932063	chr12	14803969	14803968	rs2075268	14803542	14803542	0	4.87643e-26	0.398863	0.0309644	FALSE	-2	Promoter mGene mQTLs
cg14101998	chr12	15576483	15576482	rs12231793:15736991:T:C	15584057	15584057	0	7.76368e-10	-0.164617	0.0250536	FALSE	-261660	Distal mGene mQTLs
cg11203041	chr12	16347252	16347251	rs2239676:16500448:G:C	16347514	16347514	0	1.34864e-08	0.254653	0.04237	FALSE	-372	Promoter mGene mQTLs
cg10832371	chr12	18454497	18454496	rs10743273:18629717:T:C	18476783	18476783	0	2.14661e-08	0.154414	0.0260999	FALSE	-229169	Distal mGene mQTLs
cg24015358	chr12	18469369	18469368	rs10743273:18629717:T:C	18476783	18476783	0	3.62224e-08	0.235087	0.0404659	FALSE	-229169	Distal mGene mQTLs
cg13108328	chr12	19129328	19129327	rs10505836	19135574	19135574	0	5.62535e-15	-0.303964	0.034957	FALSE	-5822	Distal mGene mQTLs
cg22852824	chr12	19212866	19212865	rs11044451:19365798:C:T	19212864	19212864	0	5.85648e-10	0.286016	0.0431753	FALSE	-83112	Distal mGene mQTLs
cg16206504	chr12	18738384	18738383	rs146005465:19699619:G:A	19546685	19546685	0	2.02828e-31	-1.87999	0.126073	TRUE	-142640	Distal non-mGene mQTLs
cg10358780	chr12	21501862	21501861	rs1061626:21654469:T:G	21501535	21501535	0	4.50521e-09	0.459292	0.0737386	FALSE	246	Promoter mGene mQTLs
cg05389560	chr12	21501731	21501730	rs1860947:21654644:C:A	21501710	21501710	0	1.9525e-10	0.18705	0.0273757	FALSE	-41	Promoter mGene mQTLs
cg15990629	chr12	24901940	24901939	rs3759087:25057206:G:A	24904272	24904272	0	9.40491e-12	0.137612	0.018615	FALSE	45187	Distal mGene mQTLs
cg05257196	chr12	24998019	24998018	rs12227003:25154734:C:G	25001800	25001800	0	9.18291e-20	-0.331049	0.0314321	TRUE	4603	Distal mGene mQTLs
cg02873991	chr12	24998330	24998329	rs12227003:25154734:C:G	25001800	25001800	0	7.72458e-16	-0.259351	0.028713	FALSE	4603	Distal mGene mQTLs
cg07185695	chr12	25386679	25386678	rs7966714:25539628:A:T	25386694	25386694	0	3.49049e-13	0.135279	0.0169512	FALSE	-453	Promoter non-mGene mQTLs
cg21917295	chr12	25973461	25973460	rs10842646:26121931:G:C	25968998	25968998	0	3.26685e-11	0.170269	0.0237636	FALSE	-9969	Distal mGene mQTLs
cg04951947	chr12	26196197	26196196	rs113819537:26348429:C:G	26195496	26195496	0	1.12244e-08	0.196149	0.0324368	FALSE	-73505	Distal mGene mQTLs
cg14081884	chr12	26833826	26833825	rs10842800:26986748:T:G	26833815	26833815	0	4.51102e-19	0.410596	0.0399757	FALSE	-617	Promoter mGene mQTLs
cg19407459	chr12	26833831	26833830	rs10842800:26986748:T:G	26833815	26833815	0	1.52621e-18	0.396419	0.0393642	FALSE	-617	Promoter mGene mQTLs
cg21380452	chr12	27014751	27014750	rs144347321:27167876:T:TG	27014943	27014943	0	2.60941e-08	-0.309011	0.0525835	TRUE	-509	Promoter mGene mQTLs
cg04878697	chr12	27524562	27524561	rs2289711:27677505:G:T	27524572	27524572	0	9.97494e-11	0.279085	0.0401072	FALSE	-1141	Promoter mGene mQTLs
cg10244138	chr12	29640875	29640874	rs1006747:29793522:T:C	29640589	29640589	0	8.12434e-09	0.181731	0.0297348	FALSE	144170	Distal mGene mQTLs
cg09604463	chr12	31959353	31959352	rs12370315:32112292:G:C	31959358	31959358	0	4.03382e-31	0.599373	0.0405033	FALSE	12	Promoter non-mGene mQTLs
cg11078824	chr12	31959396	31959395	rs12370315:32112292:G:C	31959358	31959358	0	1.35954e-07	0.0925436	0.0167219	FALSE	12	Promoter non-mGene mQTLs
cg23133460	chr12	32139975	32139974	rs897947:32292770:A:C	32139836	32139836	0	6.20629e-14	-0.209947	0.0253495	FALSE	-33001	Distal mGene mQTLs
cg00545801	chr12	32302392	32302391	rs1239585:32458281:C:G	32305347	32305347	1	6.06433e-17	0.888098	0.0938809	FALSE	-198512	Distal mGene mQTLs
cg14640736	chr12	32402269	32402268	rs2651370:32558025:A:G	32405091	32405091	0	6.04551e-08	0.196832	0.0345085	TRUE	-5562	Distal non-mGene mQTLs
cg14025941	chr12	32400322	32400321	rs79727589:32561436:C:G	32408502	32408502	0	8.29665e-13	0.230923	0.029501	FALSE	-8973	Distal non-mGene mQTLs
cg11327522	chr12	32675065	32675064	rs10844243:32713135:T:C	32560201	32560201	0	1.13353e-06	0.201346	0.0396777	TRUE	-160672	Distal non-mGene mQTLs
cg23153757	chr12	32895777	32895776	rs7954545	32895809	32895809	0	1.16132e-11	0.18967	0.0257905	FALSE	1031	Promoter mGene mQTLs
cg19980929	chr12	42239106	42239105	rs7974654:42630466:C:A	42236664	42236664	0	1.43297e-21	0.354795	0.0316472	FALSE	1685	Promoter mGene mQTLs
cg07582407	chr12	45988510	45988509	rs11183272:46382256:C:A	45988473	45988473	0	1.68772e-07	0.103131	0.0187903	FALSE	3647	Distal mGene mQTLs
cg00808740	chr12	46267523	46267522	rs2242355:46662485:G:C	46268702	46268702	0	3.57327e-09	-0.207823	0.0331231	FALSE	1315	Promoter mGene mQTLs
cg05074644	chr12	46267769	46267768	rs2242355:46662485:G:C	46268702	46268702	0	7.62403e-08	-0.236011	0.0417304	FALSE	1315	Promoter mGene mQTLs
cg06050385	chr12	46267781	46267780	rs2242355:46662485:G:C	46268702	46268702	0	1.13819e-07	-0.219604	0.0394141	FALSE	1315	Promoter mGene mQTLs
cg20424400	chr12	46550649	46550648	rs117983724:46762356:T:C	46368573	46368573	0	1.1873e-16	-1.31437	0.140612	TRUE	2890	Distal non-mGene mQTLs
cg00540222	chr12	47088668	47088667	rs11183724:47482244:G:A	47088461	47088461	0	7.6412e-07	0.0691023	0.0133868	TRUE	-8858	Distal mGene mQTLs
cg12798245	chr12	47758264	47758263	rs149309704:48152046:C:T	47758263	47758263	0	4.48831e-19	-1.82974	0.17813	TRUE	12777	Distal mGene mQTLs
cg27408600	chr12	47759342	47759341	rs145426754:48153141:A:C	47759358	47759358	0	3.43257e-07	0.320354	0.0600303	TRUE	11682	Distal mGene mQTLs
cg14223822	chr12	47762794	47762793	rs67083527:48156928:GGAGAGGAGCTAGTTT:G	47763145	47763160	0	7.28869e-09	0.159839	0.0260607	FALSE	-9229	Distal non-mGene mQTLs
cg09135639	chr12	47870694	47870693	rs10875694:48281660:T:A	47887877	47887877	0	7.03485e-09	-0.210085	0.0342136	FALSE	55171	Distal mGene mQTLs
cg11409205	chr12	47963990	47963989	rs4417373:48357756:C:A	47963973	47963973	0	1.1049e-24	0.330288	0.0266908	FALSE	-404	Promoter mGene mQTLs
cg24011408	chr12	48002572	48002571	rs1635527:48396364:G:C	48002581	48002581	0	1.68263e-23	0.622384	0.0521575	FALSE	1905	Promoter mGene mQTLs
cg13448816	chr12	48203035	48203034	rs75224897:48496565:G:C	48102782	48102782	0	4.22595e-09	0.416198	0.0666848	FALSE	2357	Promoter non-mGene mQTLs
cg22643307	chr12	48107335	48107334	rs72644847:48516093:C:A	48122310	48122310	0	1.37427e-23	0.399792	0.0334117	FALSE	-17171	Distal mGene mQTLs
cg22512068	chr12	48199036	48199035	rs10875765:48583632:T:C	48189849	48189849	0	4.17048e-08	0.202732	0.0350714	FALSE	-500	Promoter non-mGene mQTLs
cg03977860	chr12	48350446	48350445	rs2732439	48350416	48350416	0	1.67092e-28	0.205223	0.014864	FALSE	998	Promoter mGene mQTLs
cg02982793	chr12	48904042	48904041	rs10783289:49299195:T:C	48905412	48905412	0	1.76265e-06	0.0879576	0.0176781	TRUE	-1302	Promoter mGene mQTLs
cg17716664	chr12	48972207	48972206	rs12424638:49318800:G:A	48925017	48925017	0	1.95643e-08	-0.192542	0.0324412	FALSE	1457	Promoter non-mGene mQTLs
cg02885925	chr12	48972370	48972369	rs12424638:49318800:G:A	48925017	48925017	0	5.18547e-11	-0.279073	0.0394175	FALSE	1457	Promoter non-mGene mQTLs
cg27291539	chr12	48994630	48994629	rs1054442:49389320:A:C	48995537	48995537	0	1.42386e-11	0.168968	0.023092	FALSE	-387	Promoter non-mGene mQTLs
cg00757327	chr12	48997124	48997123	exm999341	48996894	48996894	0	4.17936e-25	0.205064	0.0163627	FALSE	2415	Promoter mGene mQTLs
cg25884883	chr12	49215396	49215395	rs35273099:49609515:TA:T	49215732	49215733	0	3.34348e-08	-0.283299	0.0486272	TRUE	-26996	Distal non-mGene mQTLs
cg07028869	chr12	49347382	49347381	rs74089059:49740847:G:T	49347064	49347064	0	2.12425e-08	0.306461	0.0517809	FALSE	-147	Promoter mGene mQTLs
cg06373660	chr12	49323071	49323070	rs78563203:50016989:A:G	49623206	49623206	0	1.01634e-09	0.459202	0.0704425	TRUE	-54988	Distal non-mGene mQTLs
cg15179107	chr12	49752481	49752480	rs76059547:50100071:C:T	49706288	49706288	0	1.438e-08	-0.332921	0.0555118	FALSE	1437	Promoter mGene mQTLs
cg27115361	chr12	49706346	49706345	rs897056:50137281:T:A	49743498	49743498	0	1.85438e-08	0.245675	0.041318	FALSE	-35773	Distal non-mGene mQTLs
cg27188703	chr12	49903799	49903798	rs706795	49903887	49903887	0	1.28336e-12	-0.174008	0.022452	FALSE	330	Promoter mGene mQTLs
cg16115588	chr12	49903806	49903805	rs706795	49903887	49903887	0	2.15734e-22	-0.240964	0.0209194	FALSE	330	Promoter mGene mQTLs
cg25682112	chr12	49945404	49945403	rs371777:50349123:C:A	49955340	49955340	0	9.2076e-13	-0.218158	0.0279361	FALSE	785	Promoter non-mGene mQTLs
cg22168489	chr12	50072346	50072345	rs17124219:50368740:T:C	49974957	49974957	0	7.25031e-07	0.209631	0.0405199	TRUE	-7763	Distal non-mGene mQTLs
cg06748143	chr12	50134972	50134971	rs10783334:50506813:T:G	50113030	50113030	0	2.14171e-28	0.42178	0.0306389	TRUE	-1051	Promoter non-mGene mQTLs
cg00040744	chr12	50166687	50166686	rs36016055:50507086:AT:A	50113303	50113304	0	2.61785e-16	0.240277	0.0260749	TRUE	-1324	Promoter non-mGene mQTLs
cg25034792	chr12	50167849	50167848	rs73106145:50561359:G:C	50167576	50167576	0	4.82687e-18	-1.01631	0.102861	FALSE	-43	Promoter mGene mQTLs
cg10377582	chr12	51219011	51219010	rs141658899:51613737:G:GTA	51219953	51219953	0	3.04071e-17	-0.335225	0.0350107	FALSE	-2245	Promoter mGene mQTLs
cg05528516	chr12	51238501	51238500	rs61932928:51613755:A:G	51219971	51219971	0	1.00459e-08	0.11241	0.0185211	FALSE	-2263	Promoter non-mGene mQTLs
cg09828880	chr12	51238325	51238324	rs3888223:51632455:G:T	51238671	51238671	0	2.26128e-17	-0.190138	0.0197562	TRUE	-379	Promoter mGene mQTLs
cg18077304	chr12	51424266	51424265	rs201861307:51810000:T:TG	51416216	51416216	0	1.87534e-07	-0.316579	0.0579168	TRUE	-24899	Distal mGene mQTLs
cg05807813	chr12	51424318	51424317	rs144594375:51814802:A:ATG	51421018	51421018	0	1.38925e-19	-0.545332	0.0521131	TRUE	-29701	Distal mGene mQTLs
cg22956858	chr12	51892378	51892377	rs697633:52281920:G:A	51888136	51888136	0	2.46751e-08	-0.185188	0.031452	FALSE	-176	Promoter non-mGene mQTLs
cg24557679	chr12	51923519	51923518	rs706821:52317225:A:G	51923441	51923441	0	2.01847e-07	-0.0925088	0.0169727	FALSE	-16533	Distal non-mGene mQTLs
cg17323256	chr12	52052114	52052113	rs2269342:52443653:G:T	52049869	52049869	0	8.79646e-17	-0.36506	0.0388457	FALSE	-27037	Distal mGene mQTLs
cg12586596	chr12	53251948	53251947	rs148152366:53645921:C:T	53252137	53252137	0	9.46975e-10	1.11439	0.170593	TRUE	-886	Promoter mGene mQTLs
cg03744437	chr12	53251952	53251951	rs56297209:53646327:G:C	53252543	53252543	0	4.02667e-08	0.432473	0.0747219	FALSE	-1292	Promoter mGene mQTLs
cg27467734	chr12	53252379	53252378	rs56297209:53646327:G:C	53252543	53252543	0	4.61046e-18	0.933116	0.0943688	FALSE	-1292	Promoter mGene mQTLs
cg16578815	chr12	53379146	53379145	rs7131938	53379143	53379143	0	1.08541e-10	0.232226	0.0334489	TRUE	1033	Promoter mGene mQTLs
cg06632207	chr12	53677148	53677147	rs3809156:54070919:T:C	53677135	53677135	0	6.01525e-16	0.338571	0.0373089	FALSE	273	Promoter mGene mQTLs
cg24834590	chr12	53997041	53997040	rs3803042:54387947:G:A	53994163	53994163	0	1.45281e-22	0.258041	0.0222778	FALSE	732	Promoter non-mGene mQTLs
cg07972572	chr12	54008916	54008915	rs4759316:54388473:G:A	53994689	53994689	0	3.66488e-07	-0.254322	0.0477834	FALSE	206	Promoter non-mGene mQTLs
cg24160082	chr12	54008648	54008647	rs2630772:54426521:C:T	54032737	54032737	0	7.45692e-07	-0.155332	0.0300603	TRUE	116	Promoter non-mGene mQTLs
cg14108567	chr12	54353423	54353422	rs7978227:54736765:T:C	54342981	54342981	0	6.87988e-08	0.126135	0.0222186	FALSE	-66350	Distal non-mGene mQTLs
cg03761649	chr12	54364639	54364638	rs2124530:54761931:T:C	54368147	54368147	0	2.11104e-07	-0.149566	0.0274894	TRUE	-14486	Distal non-mGene mQTLs
cg06793728	chr12	54549070	54549069	rs7134688	54549102	54549102	0	7.12095e-08	0.198012	0.0349237	FALSE	248	Promoter mGene mQTLs
cg21370074	chr12	54549151	54549150	rs4759090:54944156:G:C	54550372	54550372	0	4.80431e-15	0.193768	0.0222153	FALSE	-1022	Promoter mGene mQTLs
cg08816590	chr12	54560554	54560553	rs3825194:54954306:C:T	54560522	54560522	0	1.03822e-08	0.33918	0.055945	FALSE	-11172	Distal mGene mQTLs
cg00660843	chr12	54560617	54560616	rs3782407:54954696:C:T	54560912	54560912	1	2.73672e-07	0.699052	0.129807	FALSE	-11562	Distal mGene mQTLs
cg18499123	chr12	55019251	55019250	rs1488033:55413630:G:A	55019846	55019846	0	6.51272e-13	0.38877	0.0493958	FALSE	99	Promoter mGene mQTLs
cg06269421	chr12	55019506	55019505	rs1488033:55413630:G:A	55019846	55019846	0	9.5869e-10	0.18519	0.0283596	FALSE	99	Promoter mGene mQTLs
cg11999488	chr12	55019876	55019875	rs5798335:55414003:T:TTCTC	55020219	55020219	0	2.2717e-07	0.219014	0.0403697	TRUE	-274	Promoter mGene mQTLs
cg12507840	chr12	55723205	55723204	NHGRI_notinECorHUNT_chr12_56114769	55720985	55720985	0	2.67742e-11	-0.17419	0.0241874	TRUE	-398733	Distal non-mGene mQTLs
cg01575173	chr12	55995741	55995740	NHGRI_notinECorHUNT_chr12_56390636	55996852	55996852	0	4.79317e-07	-0.120745	0.0229372	FALSE	-416723	Distal mGene mQTLs
cg24320043	chr12	56222590	56222589	rs1274495:56616367:C:G	56222583	56222583	0	5.1922e-10	0.215468	0.0324134	TRUE	-650	Promoter mGene mQTLs
cg26547506	chr12	56469255	56469254	rs138855722:56862720:C:G	56468936	56468936	0	4.49394e-07	-0.336056	0.0636689	TRUE	-369	Promoter mGene mQTLs
cg21298759	chr12	56521526	56521525	rs7312783:56881051:G:C	56487267	56487267	0	7.30421e-15	0.251001	0.0290151	FALSE	1147	Promoter non-mGene mQTLs
cg21693060	chr12	56646416	56646415	rs7956952:57031090:G:C	56637306	56637306	0	2.94409e-08	0.617836	0.105578	TRUE	-490	Promoter non-mGene mQTLs
cg24269846	chr12	56752304	56752303	exm1014414	56752285	56752285	0	2.2662e-10	0.140908	0.0207076	FALSE	88	Promoter mGene mQTLs
cg14251488	chr12	57238713	57238712	rs7311958:57613425:C:T	57219642	57219642	0	1.48662e-06	0.189817	0.0378584	TRUE	-2847	Distal non-mGene mQTLs
cg03921149	chr12	57220318	57220317	rs11310666:57613512:CA:C	57219729	57219730	0	1.8292e-15	0.463643	0.0521733	TRUE	-2934	Distal mGene mQTLs
cg05441768	chr12	57225619	57225618	rs11310666:57613512:CA:C	57219729	57219730	0	5.54773e-07	-0.156243	0.0298616	TRUE	-2934	Distal mGene mQTLs
cg08711175	chr12	57220400	57220399	rs73120022:57613780:G:A	57219997	57219997	0	7.87952e-11	0.309619	0.0442164	FALSE	-3202	Distal mGene mQTLs
cg01606023	chr12	57219962	57219961	rs68176600:57618419:A:G	57224636	57224636	0	1.70191e-22	0.556324	0.0481366	FALSE	-7841	Distal mGene mQTLs
cg01612182	chr12	57225582	57225581	rs10717122:57623091:CT:C	57229308	57229309	0	1.08343e-13	0.365302	0.0446293	FALSE	19	Promoter non-mGene mQTLs
cg08967668	chr12	57237089	57237088	rs72132574:57625003:CCCTT:C	57231220	57231224	0	8.7049e-07	0.109229	0.0212791	TRUE	-1893	Promoter non-mGene mQTLs
cg12850103	chr12	56725582	56725581	rs113415285:57823271:C:T	57429488	57429488	0	1.56905e-06	0.458881	0.0917443	TRUE	1517	Promoter non-mGene mQTLs
cg17311469	chr12	57628628	57628627	rs774896:58025813:G:C	57632030	57632030	0	8.45244e-08	-0.172414	0.0306019	TRUE	1325	Promoter mGene mQTLs
cg21910536	chr12	57633614	57633613	rs774896:58025813:G:C	57632030	57632030	0	4.84807e-14	0.16066	0.0192986	FALSE	1325	Promoter mGene mQTLs
cg26947450	chr12	58920620	58920619	rs7970054:59314712:T:C	58920931	58920931	0	3.16839e-15	0.283785	0.0322731	TRUE	-409	Promoter mGene mQTLs
cg22510727	chr12	64147338	64147337	rs7967578:64401869:C:G	64008089	64008089	0	5.56991e-09	0.191899	0.0310179	FALSE	-163796	Distal mGene mQTLs
cg24475401	chr12	64404156	64404155	rs7961632	64404143	64404143	0	3.5971e-19	0.179332	0.0173968	FALSE	207	Promoter mGene mQTLs
cg00760904	chr12	67443408	67443407	rs7298082:67837114:T:C	67443334	67443334	0	2.21346e-14	0.373233	0.0441154	FALSE	-775	Promoter non-mGene mQTLs
cg05098765	chr12	68333360	68333359	rs2046067:68726303:C:T	68332523	68332523	0	4.1945e-08	0.182112	0.0315106	FALSE	-142	Promoter mGene mQTLs
cg14074118	chr12	68337200	68337199	rs4913436	68333077	68333077	0	2.28976e-07	0.194236	0.0358136	FALSE	-696	Promoter non-mGene mQTLs
cg15129052	chr12	68487648	68487647	rs11177250:68881311:C:G	68487531	68487531	0	1.68334e-11	0.18235	0.0250253	FALSE	156	Promoter non-mGene mQTLs
cg05269784	chr12	69331338	69331337	rs317687:69724909:T:A	69331129	69331129	0	1.93112e-13	-0.199965	0.024735	FALSE	753	Promoter non-mGene mQTLs
cg15399505	chr12	69331656	69331655	rs317687:69724909:T:A	69331129	69331129	0	8.97249e-24	-0.407822	0.0338869	FALSE	753	Promoter non-mGene mQTLs
cg26928911	chr12	69331665	69331664	rs317687:69724909:T:A	69331129	69331129	0	2.12558e-25	-0.366204	0.0289669	FALSE	753	Promoter non-mGene mQTLs
cg22834771	chr12	69360277	69360276	rs71932216:69754447:A:AT	69360667	69360667	0	4.00372e-16	-0.124914	0.0136616	FALSE	-964	Promoter mGene mQTLs
cg20745652	chr12	69585325	69585324	rs2601006:69979517:C:T	69585737	69585737	0	8.29144e-18	0.237499	0.0242574	FALSE	-403	Promoter mGene mQTLs
cg05932702	chr12	71754472	71754471	rs10879330:72147960:T:C	71754180	71754180	0	3.21697e-17	0.290867	0.0304078	FALSE	694	Promoter mGene mQTLs
cg11329599	chr12	71754492	71754491	rs10879330:72147960:T:C	71754180	71754180	0	5.2985e-20	0.383084	0.0360645	FALSE	694	Promoter mGene mQTLs
cg04906455	chr12	74537483	74537482	rs3832833:74934361:TA:T	74540581	74540582	0	1.46075e-09	0.171507	0.0265953	TRUE	-2754	Distal mGene mQTLs
cg17920789	chr12	76032510	76032509	rs1433361:76475750:C:A	76081970	76081970	0	1.51203e-07	0.179514	0.032569	FALSE	3063	Distal non-mGene mQTLs
cg27472102	chr12	77066162	77066161	rs11611702:77459735:C:T	77065955	77065955	0	3.95314e-11	-0.252972	0.0354797	FALSE	-375	Promoter mGene mQTLs
cg08784247	chr12	80936030	80936029	rs1795514:81332867:A:G	80939088	80939088	0	1.38331e-11	-0.22768	0.0310936	FALSE	-3255	Distal mGene mQTLs
cg00323458	chr12	80936356	80936355	rs1795514:81332867:A:G	80939088	80939088	0	2.32779e-07	-0.245678	0.045328	FALSE	-3255	Distal mGene mQTLs
cg10077746	chr12	89350012	89350011	rs11105263:89749509:A:G	89355732	89355732	0	7.17059e-07	-0.271937	0.0525385	FALSE	-2461	Promoter mGene mQTLs
cg14863830	chr12	89459168	89459167	rs76074945:89884709:C:A	89490932	89490932	0	6.43839e-09	0.244049	0.0396312	FALSE	35092	Distal mGene mQTLs
cg20438663	chr12	89350925	89350924	rs876554:89885473:T:C	89491696	89491696	0	1.52588e-10	-0.189398	0.0275328	FALSE	34328	Distal non-mGene mQTLs
cg02244243	chr12	89544226	89544225	rs4842664:89938030:G:A	89544253	89544253	0	3.08764e-07	0.154974	0.0289164	TRUE	235	Promoter non-mGene mQTLs
cg05379312	chr12	89615153	89615152	rs11105354:90026523:A:G	89632746	89632746	0	2.09472e-10	-0.171609	0.0251645	FALSE	76554	Distal mGene mQTLs
cg03566156	chr12	92059916	92059915	rs2035951	92049547	92049547	0	9.38146e-18	-0.429816	0.043992	FALSE	93367	Distal non-mGene mQTLs
cg09688127	chr12	93377019	93377018	rs202241092:93779752:A:AT	93385976	93385976	0	2.45278e-11	0.312701	0.0433237	FALSE	-8093	Distal mGene mQTLs
cg21910672	chr12	93573805	93573804	rs903173	93764711	93764711	0	8.82297e-13	-0.267845	0.0342655	FALSE	-87336	Distal non-mGene mQTLs
cg21266616	chr12	93742774	93742773	rs903173	93764711	93764711	0	9.8837e-13	0.202371	0.0259563	FALSE	-87336	Distal mGene mQTLs
cg25580096	chr12	94147823	94147822	rs149167069:94542131:TGGCGGCCGC:T	94148355	94148364	0	1.83342e-09	0.361521	0.0564464	TRUE	368	Promoter mGene mQTLs
cg17140262	chr12	95225016	95225015	rs11309269:95619874:TA:T	95226098	95226099	0	1.92469e-13	0.203671	0.0251915	TRUE	-8352	Distal mGene mQTLs
cg17473341	chr12	95546595	95546594	rs11108100:95940716:T:C	95546940	95546940	0	1.30646e-11	0.888339	0.121145	FALSE	4550	Distal mGene mQTLs
cg18627852	chr12	95858825	95858824	rs7975222:96252619:G:A	95858841	95858841	0	1.28638e-14	0.114144	0.0133444	FALSE	87	Promoter mGene mQTLs
cg19208107	chr12	95842539	95842538	rs66876037:96253003:A:AG	95859225	95859225	0	2.23304e-18	1.10414	0.110329	TRUE	-386	Promoter non-mGene mQTLs
cg07083543	chr12	95943633	95943632	rs79322116:96336281:G:A	95942503	95942503	0	2.18995e-09	-0.183179	0.028756	FALSE	471	Promoter mGene mQTLs
cg25229172	chr12	95942344	95942343	rs79322116:96336281:G:A	95942503	95942503	0	2.60219e-25	-0.46704	0.0370393	FALSE	790	Promoter mGene mQTLs
cg07389322	chr12	95942469	95942468	rs79322116:96336281:G:A	95942503	95942503	0	3.43269e-12	-0.257864	0.034044	FALSE	790	Promoter mGene mQTLs
cg07668757	chr12	96242721	96242720	rs142495343:96636451:CT:C	96242673	96242674	0	8.41387e-07	-0.162604	0.0316308	TRUE	-48291	Distal mGene mQTLs
cg22407536	chr12	98221476	98221475	rs202167989:98658536:CAGAG:C	98264758	98264762	0	8.67204e-11	-0.235916	0.0337769	TRUE	27687	Distal non-mGene mQTLs
cg21469089	chr12	98260583	98260582	rs202167989:98658536:CAGAG:C	98264758	98264762	0	3.17183e-22	0.319917	0.0279255	TRUE	27687	Distal non-mGene mQTLs
cg06090684	chr12	101278695	101278694	rs2607913:101673707:T:G	101279929	101279929	0	2.09611e-19	0.21899	0.0210629	FALSE	180	Promoter mGene mQTLs
cg17419626	chr12	102950559	102950558	rs7303972:103347958:A:T	102954180	102954180	0	2.26153e-07	-0.10016	0.0184586	FALSE	4230	Distal non-mGene mQTLs
cg27569040	chr12	102958078	102958077	rs9782	102958048	102958048	0	7.13067e-14	-0.208003	0.025188	FALSE	-362	Promoter mGene mQTLs
cg25935014	chr12	103495265	103495264	rs12422517:103889031:A:G	103495253	103495253	0	8.21841e-10	-0.127504	0.0194376	FALSE	757	Promoter mGene mQTLs
cg11659394	chr12	104286607	104286606	rs4077561:104680368:T:C	104286590	104286590	0	6.61472e-12	0.200813	0.0269322	FALSE	-70811	Distal mGene mQTLs
cg01650245	chr12	105233011	105233010	rs1196780:105627031:T:A	105233253	105233253	0	1.8676e-10	-0.199921	0.0292236	FALSE	2985	Distal mGene mQTLs
cg19229557	chr12	105233160	105233159	rs6144851:105629953:G:GCCCGCCGGCCCTCCTCCCGGCCCT	105236175	105236175	0	1.5156e-07	-0.112604	0.0204315	TRUE	63	Promoter mGene mQTLs
cg03710564	chr12	105705863	105705862	rs10861479:106099565:C:T	105705787	105705787	0	6.16806e-09	0.173389	0.0281179	FALSE	-1584	Promoter mGene mQTLs
cg13249833	chr12	106246142	106246141	rs61942136:106649224:C:T	106255446	106255446	0	4.89256e-12	0.28482	0.0379219	FALSE	48833	Distal mGene mQTLs
cg09239756	chr12	106248583	106248582	rs61942136:106649224:C:T	106255446	106255446	0	6.17465e-08	0.18016	0.03161	TRUE	48833	Distal mGene mQTLs
cg13163660	chr12	106248780	106248779	rs61942136:106649224:C:T	106255446	106255446	0	3.05982e-14	0.256883	0.0305648	FALSE	48833	Distal mGene mQTLs
cg00173435	chr12	106302748	106302747	rs34652259:106696576:T:TG	106302798	106302798	0	5.46857e-07	0.0848733	0.0162114	FALSE	-869	Promoter mGene mQTLs
cg02476566	chr12	106302750	106302749	rs1532587:106700709:A:G	106306931	106306931	0	1.35075e-19	0.211403	0.0201932	FALSE	-5002	Distal mGene mQTLs
cg02032070	chr12	106357529	106357528	rs73197542:106751270:T:C	106357492	106357492	0	2.25856e-08	0.155346	0.0263033	FALSE	166	Promoter mGene mQTLs
cg21935516	chr12	106987928	106987927	rs2287161:107381140:C:G	106987362	106987362	0	2.54738e-18	0.415894	0.0416476	FALSE	-196	Promoter mGene mQTLs
cg12728312	chr12	108128928	108128927	rs114920790:108522676:A:G	108128899	108128899	0	6.05517e-09	-0.139114	0.0225462	TRUE	572	Promoter mGene mQTLs
cg20940052	chr12	109575936	109575935	rs7308864:109871179:A:G	109433374	109433374	0	1.0744e-08	0.111929	0.0184828	FALSE	-85471	Distal non-mGene mQTLs
cg25900312	chr12	109766431	109766430	rs824999:110152606:G:C	109714801	109714801	0	1.62136e-07	-0.141199	0.0256864	FALSE	58707	Distal mGene mQTLs
cg06534061	chr12	110029257	110029256	rs112276518:110196747:G:A	109758942	109758942	0	4.39278e-18	-2.16096	0.218367	TRUE	-44714	Distal non-mGene mQTLs
cg25973282	chr12	110068334	110068333	rs73191838:110967544:A:G	110529739	110529739	1	1.5178e-07	-1.19383	0.216627	FALSE	-28084	Distal non-mGene mQTLs
cg03320783	chr12	112992932	112992931	rs1293762:113430836:T:G	112993031	112993031	0	3.42717e-13	0.277508	0.0347594	FALSE	-14636	Distal mGene mQTLs
cg23627149	chr12	115570585	115570584	rs6490026:116008356:G:A	115570551	115570551	0	3.94292e-12	0.138054	0.0182865	FALSE	-887	Promoter non-mGene mQTLs
cg18558257	chr12	115953468	115953467	rs56317424:116621614:T:G	116183809	116183809	0	2.40362e-07	-0.250629	0.0463	TRUE	93529	Distal non-mGene mQTLs
cg27106959	chr12	119037047	119037046	rs10775010:119425898:T:C	118988093	118988093	0	6.0872e-07	0.117459	0.0225365	FALSE	-6598	Distal mGene mQTLs
cg12689803	chr12	119082144	119082143	rs60407065:119516574:A:T	119078769	119078769	0	3.11631e-10	-0.216468	0.0320955	FALSE	-97274	Distal mGene mQTLs
cg09658787	chr12	119334897	119334896	rs3809306	119334937	119334937	0	1.91076e-16	-0.265396	0.0286365	FALSE	-225	Promoter mGene mQTLs
cg11826475	chr12	120266204	120266203	rs147625061:120674929:C:CGT	120237126	120237126	0	1.05313e-07	-0.10266	0.0183714	TRUE	28645	Distal mGene mQTLs
cg15569123	chr12	120254305	120254304	rs56102477:120685493:C:T	120247690	120247690	0	1.21786e-07	0.302312	0.0543972	FALSE	18081	Distal mGene mQTLs
cg22883699	chr12	120377681	120377680	rs76019166:120690511:C:G	120252708	120252708	0	6.71985e-07	0.235935	0.0454574	FALSE	-27964	Distal non-mGene mQTLs
cg17403084	chr12	120266232	120266231	rs112863429:120703715:G:C	120265912	120265912	0	1.1837e-11	-0.170483	0.0231925	FALSE	-141	Promoter mGene mQTLs
cg22359828	chr12	120317526	120317525	rs3847968:120730869:G:A	120293066	120293066	0	1.30169e-07	0.187554	0.0338335	TRUE	-1163	Promoter non-mGene mQTLs
cg11824956	chr12	120291984	120291983	rs78033146:120730889:AG:A	120293086	120293087	0	4.19846e-19	0.628491	0.0611198	TRUE	-1183	Promoter non-mGene mQTLs
cg15611176	chr12	120326067	120326066	rs2070873:120763440:C:A	120325637	120325637	0	1.13719e-16	0.393134	0.0420253	FALSE	2152	Promoter mGene mQTLs
cg09924998	chr12	120328347	120328346	rs1179450:120801856:T:C	120364053	120364053	0	8.11791e-08	-0.11578	0.0205192	TRUE	5127	Distal non-mGene mQTLs
cg18552482	chr12	120326013	120326012	rs2283367:120802968:C:A	120365165	120365165	0	3.01438e-23	0.607477	0.0513151	FALSE	4015	Distal non-mGene mQTLs
cg05954233	chr12	120468360	120468359	rs680795:120906034:C:G	120468231	120468231	0	5.32146e-11	0.183556	0.0259438	FALSE	1562	Promoter mGene mQTLs
cg12651933	chr12	120581541	120581540	rs12857:120933946:T:G	120496143	120496143	0	2.47482e-42	0.903549	0.0469743	FALSE	-203	Promoter non-mGene mQTLs
cg18477009	chr12	120649975	120649974	rs553328:121081295:A:G	120643492	120643492	0	6.10476e-18	0.387055	0.0393288	FALSE	-2940	Distal mGene mQTLs
cg24179646	chr12	120649553	120649552	rs503667:121088750:A:G	120650947	120650947	0	8.09935e-11	0.246421	0.0352169	TRUE	-10395	Distal mGene mQTLs
cg24292016	chr12	120649887	120649886	rs503667:121088750:A:G	120650947	120650947	0	2.8329e-11	0.209077	0.0290735	FALSE	-10395	Distal mGene mQTLs
cg02419362	chr12	120766146	120766145	rs904628:121342084:G:A	120904281	120904281	0	2.22346e-18	0.413357	0.0413007	FALSE	90	Promoter mGene mQTLs
cg19357999	chr12	121223960	121223959	rs28360466:121647870:G:T	121210067	121210067	0	8.85127e-08	0.145427	0.0258562	FALSE	-210	Promoter mGene mQTLs
cg00086310	chr12	121590690	121590689	rs28421662:122013999:G:C	121576094	121576094	0	1.64628e-08	0.279051	0.046742	FALSE	4698	Distal non-mGene mQTLs
cg26392922	chr12	121794915	121794914	rs712852:122233495:G:C	121795589	121795589	0	4.03698e-18	-0.395681	0.0399277	FALSE	7814	Distal mGene mQTLs
cg03141007	chr12	121812613	121812612	rs1168663:122234089:T:A	121796183	121796183	0	1.95205e-08	0.141267	0.0238001	FALSE	7997	Distal mGene mQTLs
cg21171335	chr12	121918485	121918484	rs11043242:122356293:G:C	121918387	121918387	0	1.0335e-22	1.17892	0.101297	FALSE	-525	Promoter mGene mQTLs
cg01765077	chr12	121918411	121918410	rs11043278:122412145:C:T	121974239	121974239	0	4.82686e-31	0.640636	0.0433787	FALSE	-56377	Distal mGene mQTLs
cg14901202	chr12	122182936	122182935	rs77165791:122667631:T:G	122183084	122183084	0	6.31646e-09	-0.158387	0.0257047	FALSE	-15346	Distal mGene mQTLs
cg16727877	chr12	122423870	122423869	rs7972135:122908476:T:C	122423929	122423929	0	1.27792e-25	-0.777	0.0610619	FALSE	-1297	Promoter mGene mQTLs
cg18354094	chr12	122979604	122979603	rs61955196:123451018:G:C	122966471	122966471	0	7.8846e-20	-0.179823	0.0170332	FALSE	15178	Distal non-mGene mQTLs
cg00343127	chr12	122980015	122980014	rs61955196:123451018:G:C	122966471	122966471	0	2.71842e-18	-0.292169	0.0292893	FALSE	15178	Distal non-mGene mQTLs
cg07463206	chr12	122980058	122980057	rs11608811:123529056:A:G	123044509	123044509	0	4.45623e-12	-0.468154	0.0621924	FALSE	105506	Distal non-mGene mQTLs
cg20004655	chr12	122979965	122979964	rs59131741:123536456:C:CT	123051909	123051909	0	2.05388e-20	-0.282844	0.026245	TRUE	98106	Distal non-mGene mQTLs
cg17908563	chr12	122980109	122980108	rs59131741:123536456:C:CT	123051909	123051909	0	6.45733e-12	-0.202755	0.0271766	TRUE	98106	Distal non-mGene mQTLs
cg01030110	chr12	123043881	123043880	rs7975763:123604053:C:T	123119506	123119506	0	1.05947e-13	0.180299	0.0220168	FALSE	30509	Distal mGene mQTLs
cg00585698	chr12	123266318	123266317	rs10846491:123753492:C:G	123268945	123268945	0	3.67187e-10	-0.141488	0.0210755	FALSE	3389	Distal mGene mQTLs
cg21857251	chr12	123273460	123273459	rs140153724:123847315:CAAA:C	123362768	123362771	0	1.70165e-10	0.372981	0.054382	TRUE	1100	Promoter non-mGene mQTLs
cg05861255	chr12	123437142	123437141	exm2220137	123436717	123436717	0	4.07617e-08	-0.145063	0.0250746	TRUE	0	Promoter mGene mQTLs
cg13239004	chr12	123613044	123613043	rs36002329:124070612:A:C	123586065	123586065	0	1.67258e-13	-0.31957	0.0394071	FALSE	-1534	Promoter non-mGene mQTLs
cg13830619	chr12	123582314	123582313	rs11342180:124072734:GT:G	123588187	123588188	0	7.03269e-11	-0.287682	0.0409601	FALSE	-3656	Distal non-mGene mQTLs
cg07842649	chr12	123949342	123949341	rs80270210:124447397:G:T	123962850	123962850	0	3.77588e-08	-0.128943	0.0222277	TRUE	9981	Distal mGene mQTLs
cg04996472	chr12	124259716	124259715	rs12301479:124743910:C:T	124259364	124259364	0	5.17561e-22	0.50552	0.0444354	FALSE	-286123	Distal non-mGene mQTLs
cg08034663	chr12	124408966	124408965	rs1147286:124948235:G:A	124463689	124463689	0	2.76286e-07	0.191054	0.0354902	FALSE	103900	Distal mGene mQTLs
cg15199476	chr12	124408980	124408979	rs1147286:124948235:G:A	124463689	124463689	0	8.3661e-08	0.178887	0.0317387	TRUE	103900	Distal mGene mQTLs
cg06881647	chr12	124409011	124409010	rs1147286:124948235:G:A	124463689	124463689	0	1.20574e-07	0.191094	0.0343719	FALSE	103900	Distal mGene mQTLs
cg18888234	chr12	126726149	126726148	rs3803147:127211056:C:A	126726510	126726510	0	3.35363e-10	-0.276578	0.0410927	FALSE	-240	Promoter non-mGene mQTLs
cg22790870	chr12	128385444	128385443	rs7980219:128868097:A:T	128383552	128383552	0	4.25007e-17	-0.496727	0.0521819	FALSE	-116149	Distal mGene mQTLs
cg24410690	chr12	128814937	128814936	rs11059928:129296103:A:T	128811558	128811558	0	3.90559e-08	-0.321198	0.0554359	FALSE	12425	Distal mGene mQTLs
cg16316183	chr12	128814921	128814920	rs113882544:129297737:T:C	128813192	128813192	0	2.583e-08	-0.372258	0.0633238	TRUE	10791	Distal mGene mQTLs
cg23521905	chr12	128814146	128814145	rs4760537:129301299:C:A	128816754	128816754	0	1.89226e-13	0.266312	0.0329272	FALSE	7229	Distal mGene mQTLs
cg05253716	chr12	128814788	128814787	rs4760537:129301299:C:A	128816754	128816754	0	5.59552e-08	0.181702	0.0317667	FALSE	7229	Distal mGene mQTLs
cg14993491	chr12	130070186	130070185	rs75389821:130554692:G:T	130070147	130070147	0	2.59958e-19	0.385817	0.0372351	FALSE	178	Promoter non-mGene mQTLs
cg05118916	chr12	130070214	130070213	rs75389821:130554692:G:T	130070147	130070147	0	1.98071e-19	0.313747	0.0301498	FALSE	178	Promoter non-mGene mQTLs
cg26666107	chr12	130070294	130070293	rs75389821:130554692:G:T	130070147	130070147	0	6.32109e-12	0.325713	0.0436352	TRUE	178	Promoter non-mGene mQTLs
cg14214659	chr12	130070433	130070432	rs75389821:130554692:G:T	130070147	130070147	0	4.93389e-13	0.352838	0.0445529	FALSE	178	Promoter non-mGene mQTLs
cg26491818	chr12	130477405	130477404	rs884256:130961977:A:G	130477432	130477432	0	2.26287e-09	-0.198739	0.03123	FALSE	40485	Distal mGene mQTLs
cg06069407	chr12	130641305	130641304	rs11061051:131129365:A:G	130644820	130644820	0	1.07497e-12	0.219897	0.0282581	FALSE	71461	Distal non-mGene mQTLs
cg00447469	chr12	130669264	130669263	rs60876022:131152746:T:A	130668201	130668201	0	2.88987e-15	0.65825	0.0747256	FALSE	-16830	Distal non-mGene mQTLs
cg22511774	chr12	130686637	130686636	rs11309202:131187060:CA:C	130702515	130702516	0	2.49302e-09	-0.181365	0.0285848	FALSE	13766	Distal non-mGene mQTLs
cg06960461	chr12	130706312	130706311	rs7295428:131197817:A:C	130713272	130713272	0	7.62886e-08	-0.161827	0.0286142	TRUE	3009	Distal non-mGene mQTLs
cg11639130	chr12	130818934	130818933	rs4644680	130830276	130830276	0	1.61552e-13	-0.354499	0.0436816	TRUE	8990	Distal mGene mQTLs
cg08650362	chr12	130813943	130813942	rs1077317:131314977:C:T	130830432	130830432	0	6.93948e-17	0.246547	0.0261247	TRUE	8834	Distal mGene mQTLs
cg15042942	chr12	131770788	131770787	rs1195896:131507425:A:G	131022880	131022880	0	6.73925e-07	-0.174748	0.0336726	TRUE	1861	Promoter non-mGene mQTLs
cg11065889	chr12	131078261	131078260	rs2178485:131544634:T:C	131060089	131060089	0	8.18338e-19	0.460171	0.0452337	FALSE	-106182	Distal mGene mQTLs
cg01843264	chr12	131084220	131084219	rs113748144:131582714:C:T	131098169	131098169	0	3.47286e-08	-0.140173	0.0240924	TRUE	-144262	Distal non-mGene mQTLs
cg06581300	chr12	131121926	131121925	rs1725788:131608476:A:G	131123931	131123931	0	8.62458e-08	0.230892	0.0410119	FALSE	-170024	Distal mGene mQTLs
cg18946787	chr12	131122313	131122312	rs1725789	131124981	131124981	0	1.43737e-08	0.378431	0.0630992	TRUE	-171074	Distal non-mGene mQTLs
cg24846573	chr12	131124772	131124771	rs1725789	131124981	131124981	0	2.61456e-12	0.452719	0.0593867	FALSE	-171074	Distal non-mGene mQTLs
cg13899096	chr12	131120676	131120675	rs1725789	131124981	131124981	0	9.18113e-15	0.309061	0.035889	FALSE	-171074	Distal mGene mQTLs
cg22663463	chr12	131121786	131121785	rs1725789	131124981	131124981	0	2.3579e-15	0.490015	0.0554097	FALSE	-171074	Distal mGene mQTLs
cg03153539	chr12	131124081	131124080	rs1725789	131124981	131124981	0	7.93078e-25	0.585476	0.0471079	FALSE	-171074	Distal mGene mQTLs
cg16088107	chr12	131132542	131132541	rs112643563:131617074:C:CG	131132529	131132529	0	1.63173e-12	0.218485	0.0283472	FALSE	-178622	Distal non-mGene mQTLs
cg03570417	chr12	131827917	131827916	rs6598161:132312488:C:A	131827943	131827943	0	8.42199e-18	0.283194	0.0289322	FALSE	450	Promoter mGene mQTLs
cg15010296	chr12	131900654	131900653	rs4964882:132381696:C:T	131897151	131897151	0	6.25005e-22	-0.640527	0.0564547	FALSE	-2500	Promoter mGene mQTLs
cg02243221	chr12	131892880	131892879	rs4964923:132388500:C:T	131903955	131903955	0	5.93786e-12	0.175314	0.023451	FALSE	-9304	Distal non-mGene mQTLs
cg05134918	chr12	132118987	132118986	rs57948063:132568726:GC:G	132084181	132084182	0	7.1141e-13	-0.295925	0.037674	FALSE	102	Promoter mGene mQTLs
cg04021497	chr12	131437338	131437337	rs138166478:132627884:C:T	132143339	132143339	0	1.46614e-07	-0.414892	0.0751844	FALSE	996	Promoter non-mGene mQTLs
cg19769827	chr12	132190305	132190304	rs7307636:132674034:G:C	132189489	132189489	0	1.51542e-28	-0.459034	0.0332086	FALSE	206	Promoter non-mGene mQTLs
cg10965749	chr12	132185828	132185827	rs7298968:132674116:T:C	132189571	132189571	0	5.39169e-11	-0.147524	0.0208582	FALSE	124	Promoter non-mGene mQTLs
cg24550515	chr12	132433169	132433168	rs28623640:133001004:T:C	132424418	132424418	0	1.56878e-09	0.117358	0.0182376	FALSE	790	Promoter non-mGene mQTLs
cg12664795	chr12	132661103	132661102	rs141970815:133066123:G:C	132489537	132489537	0	1.35048e-07	-0.202142	0.0365162	TRUE	14	Promoter non-mGene mQTLs
cg14669847	chr12	132431090	132431089	rs11147230:133072460:G:C	132495874	132495874	1	3.65534e-07	-0.624767	0.117372	TRUE	-6323	Distal non-mGene mQTLs
cg07116732	chr12	132547357	132547356	rs7398953:133101355:C:T	132524769	132524769	0	1.46796e-07	-0.176557	0.0319962	FALSE	-35218	Distal mGene mQTLs
cg19100996	chr12	132562001	132562000	rs4883521:133114840:G:A	132538254	132538254	0	1.04638e-07	-0.111988	0.0200358	TRUE	-48703	Distal mGene mQTLs
cg23460285	chr12	132500102	132500101	rs59196714:133133141:ACCC:A	132556555	132556558	0	3.27957e-09	0.153885	0.0244607	TRUE	-67004	Distal mGene mQTLs
cg05053403	chr12	132544091	132544090	rs7973990:133137480:G:C	132560894	132560894	0	5.77306e-08	-0.282925	0.0495194	FALSE	-71343	Distal mGene mQTLs
cg02726803	chr12	132619688	132619687	rs6560889	132618549	132618549	0	3.06211e-07	-0.160102	0.0298633	TRUE	231	Promoter mGene mQTLs
cg01803747	chr12	132618583	132618582	12:133195182:TCCCCGCGAGG:T	132618596	132618606	0	7.5775e-08	0.369371	0.0652957	TRUE	184	Promoter mGene mQTLs
cg20967006	chr12	132610551	132610550	rs6560890:133195311:A:C	132618725	132618725	0	5.81295e-12	-0.312535	0.041785	TRUE	55	Promoter non-mGene mQTLs
cg13426224	chr12	132619862	132619861	rs7964634:133196596:T:C	132620010	132620010	0	2.94667e-13	-0.146959	0.0183464	FALSE	-1230	Promoter mGene mQTLs
ch.12.2920490F	chr12	132646414	132646413	rs2075784:133263825:G:A	132687239	132687239	0	6.63147e-09	0.114226	0.018567	FALSE	126	Promoter mGene mQTLs
cg21686600	chr12	132768609	132768608	rs7971299:133337352:G:A	132760766	132760766	0	4.46406e-09	-0.142985	0.0229494	FALSE	1122	Promoter non-mGene mQTLs
cg25488374	chr12	132835219	132835218	rs55706161:133382637:G:A	132806051	132806051	0	1.12029e-14	0.425642	0.0496233	FALSE	16077	Distal non-mGene mQTLs
cg16300310	chr12	132804919	132804918	rs957800	132826956	132826956	0	9.81031e-09	0.267124	0.0439777	FALSE	1902	Promoter mGene mQTLs
cg11882616	chr12	132807305	132807304	rs61952781:133412428:A:G	132835842	132835842	0	1.1677e-25	0.684978	0.0537683	FALSE	-342	Promoter non-mGene mQTLs
cg15448366	chr12	132807980	132807979	rs61952781:133412428:A:G	132835842	132835842	0	1.98291e-27	0.788759	0.0588508	FALSE	-342	Promoter non-mGene mQTLs
cg17491146	chr12	132825966	132825965	rs61952781:133412428:A:G	132835842	132835842	0	5.43113e-17	0.316463	0.0333884	TRUE	-342	Promoter non-mGene mQTLs
cg16343357	chr12	132833072	132833071	rs61952781:133412428:A:G	132835842	132835842	0	2.14279e-25	0.67297	0.0532377	FALSE	-342	Promoter non-mGene mQTLs
cg03278726	chr12	132804789	132804788	rs72624274:133414251:C:T	132837665	132837665	0	4.93796e-14	0.475185	0.0571014	FALSE	-2165	Promoter non-mGene mQTLs
cg15417666	chr12	132806628	132806627	rs72624274:133414251:C:T	132837665	132837665	0	4.20475e-26	0.562773	0.0436075	TRUE	-2165	Promoter non-mGene mQTLs
cg18770446	chr12	132806722	132806721	rs72624274:133414251:C:T	132837665	132837665	0	1.22806e-29	0.745465	0.0523691	FALSE	-2165	Promoter non-mGene mQTLs
cg04154653	chr12	132822535	132822534	rs72624274:133414251:C:T	132837665	132837665	0	3.54764e-28	0.53326	0.0389707	FALSE	-2165	Promoter non-mGene mQTLs
cg00086243	chr12	132823514	132823513	rs72624274:133414251:C:T	132837665	132837665	0	1.78198e-32	0.671405	0.0438361	FALSE	-2165	Promoter non-mGene mQTLs
cg22335801	chr12	132824290	132824289	rs72624274:133414251:C:T	132837665	132837665	0	8.84165e-29	0.673161	0.0483907	FALSE	-2165	Promoter non-mGene mQTLs
cg14661234	chr12	132825189	132825188	rs72624274:133414251:C:T	132837665	132837665	0	1.79584e-22	0.565952	0.0490066	FALSE	-2165	Promoter non-mGene mQTLs
cg00657094	chr12	132833152	132833151	rs72624274:133414251:C:T	132837665	132837665	1	1.90981e-09	0.834205	0.130411	FALSE	-2165	Promoter non-mGene mQTLs
cg20411340	chr12	132834295	132834294	rs72624274:133414251:C:T	132837665	132837665	0	1.05094e-28	0.590215	0.0425146	FALSE	-2165	Promoter non-mGene mQTLs
cg18066197	chr12	132841300	132841299	rs3741494:133464500:C:T	132887914	132887914	0	1.6959e-07	-0.228925	0.0417177	FALSE	68390	Distal mGene mQTLs
cg20849121	chr12	132829462	132829461	rs28372675:133464669:G:A	132888083	132888083	0	8.86253e-11	-0.184566	0.0264402	FALSE	-241	Promoter non-mGene mQTLs
cg03384979	chr13	20161178	20161177	rs10467363:20735323:C:T	20161184	20161184	0	5.04489e-24	0.597737	0.0492849	FALSE	-135	Promoter mGene mQTLs
cg06710890	chr13	20903727	20903726	rs7326480:21476997:A:G	20902858	20902858	0	2.3332e-07	0.212046	0.0391265	FALSE	190	Promoter mGene mQTLs
cg08154998	chr13	21298081	21298080	rs2038981:21872188:A:T	21298049	21298049	0	5.7253e-10	0.113815	0.0171696	FALSE	90	Promoter non-mGene mQTLs
cg23276796	chr13	21459715	21459714	rs1885686:22030302:T:C	21456163	21456163	0	8.27952e-09	0.21883	0.0358271	FALSE	3207	Distal mGene mQTLs
cg25084027	chr13	21459317	21459316	rs9509738:22032305:A:C	21458166	21458166	0	5.22408e-08	0.148587	0.0259129	TRUE	1204	Promoter mGene mQTLs
cg02063079	chr13	21668892	21668891	rs34785540:22244008:AGTGT:A	21669869	21669873	0	3.06927e-08	-0.153297	0.026234	TRUE	1514	Promoter non-mGene mQTLs
cg07049167	chr13	21669254	21669253	rs34785540:22244008:AGTGT:A	21669869	21669873	0	4.18227e-10	-0.20411	0.0305157	TRUE	1514	Promoter non-mGene mQTLs
cg13955065	chr13	22220675	22220674	rs9506804:22794884:A:G	22220745	22220745	0	6.50072e-11	0.145479	0.0206703	FALSE	-179770	Distal non-mGene mQTLs
cg16923290	chr13	23375609	23375608	rs138492982:23949776:A:G	23375637	23375637	0	2.14318e-23	0.447535	0.0376285	FALSE	35876	Distal mGene mQTLs
cg15519382	chr13	23427829	23427828	rs6490794:24001944:G:C	23427805	23427805	0	7.97327e-14	0.226413	0.027482	FALSE	-8834	Distal non-mGene mQTLs
cg12875393	chr13	23465953	23465952	rs2065564:24040298:C:T	23466159	23466159	0	7.62208e-09	0.145379	0.0237376	FALSE	412	Promoter non-mGene mQTLs
cg12472473	chr13	23559375	23559374	rs11451799:24153565:A:AC	23579426	23579426	0	2.27726e-08	-0.153464	0.025992	FALSE	-9056	Distal non-mGene mQTLs
cg02083965	chr13	24017334	24017333	rs4770549:24591679:A:G	24017540	24017540	0	2.56512e-36	0.83286	0.0495488	FALSE	-37735	Distal mGene mQTLs
cg25643223	chr13	24213058	24213057	rs17364874:24787005:G:A	24212867	24212867	0	2.6678e-07	0.10033	0.0186114	FALSE	-233062	Distal mGene mQTLs
cg21853568	chr13	24328363	24328362	rs74860689:24902506:G:A	24328368	24328368	0	2.94869e-26	1.61128	0.124297	TRUE	-157	Promoter non-mGene mQTLs
cg25344322	chr13	24745631	24745630	rs9511432:25319800:A:G	24745662	24745662	0	5.43566e-10	-0.133039	0.0200397	FALSE	-2985	Distal non-mGene mQTLs
cg14217684	chr13	25287415	25287414	rs3809335	25287439	25287439	0	1.10031e-07	0.232398	0.041657	FALSE	570	Promoter mGene mQTLs
cg14336545	chr13	25468986	25468985	rs1764645	25424367	25424367	0	1.18265e-07	-0.198611	0.0356979	FALSE	-52296	Distal mGene mQTLs
cg17440241	chr13	26619465	26619464	rs12867025:27188777:A:G	26614640	26614640	0	1.13167e-17	-0.26158	0.0268584	TRUE	-56937	Distal mGene mQTLs
cg17752448	chr13	27271492	27271491	rs9507867:27845340:G:C	27271203	27271203	0	1.16698e-23	-0.303211	0.0252841	FALSE	-876	Promoter mGene mQTLs
cg23650629	chr13	27271578	27271577	rs9507867:27845340:G:C	27271203	27271203	0	8.9222e-11	-0.142108	0.0203615	FALSE	-876	Promoter mGene mQTLs
cg13557709	chr13	27425410	27425409	rs1049302:27998769:T:C	27424632	27424632	0	1.06829e-13	-0.260007	0.0317557	FALSE	-88	Promoter mGene mQTLs
cg11655627	chr13	27425330	27425329	rs7998978:27999457:T:C	27425320	27425320	0	4.19193e-20	1.35927	0.127506	FALSE	-776	Promoter mGene mQTLs
cg17847428	chr13	27618889	27618888	rs8002709	27578597	27578597	0	3.22643e-14	-0.381155	0.0454005	FALSE	41807	Distal mGene mQTLs
cg03805527	chr13	28313798	28313797	rs9579176	28308334	28308334	0	9.76937e-10	-0.253664	0.0388672	TRUE	186794	Distal mGene mQTLs
cg24321030	chr13	28718752	28718751	rs66964313:29294042:G:C	28719905	28719905	0	2.62454e-07	0.108845	0.0201778	FALSE	-935	Promoter mGene mQTLs
cg08278466	chr13	28796438	28796437	rs199742335:29393884:A:AGCTGGG	28819747	28819747	0	3.01315e-08	0.136821	0.0233993	TRUE	601	Promoter non-mGene mQTLs
cg19209977	chr13	29362929	29362928	rs7319027:29937465:A:G	29363328	29363328	0	2.57238e-26	-0.269239	0.0207341	FALSE	-542980	Distal mGene mQTLs
cg03989020	chr13	29428198	29428197	rs4238122:30008229:A:G	29434092	29434092	0	7.65025e-08	-0.132142	0.0233678	FALSE	-613744	Distal mGene mQTLs
cg08495784	chr13	29572689	29572688	rs280936	29582180	29582180	0	7.31588e-09	-0.207028	0.0337586	TRUE	13508	Distal mGene mQTLs
cg14424530	chr13	29595993	29595992	rs34978805:30166886:A:G	29592749	29592749	0	4.04878e-08	0.181216	0.0313162	TRUE	2939	Distal mGene mQTLs
cg01840183	chr13	30152628	30152627	rs913908:30725876:G:A	30151739	30151739	0	1.63685e-09	0.294692	0.0458543	FALSE	7882	Distal non-mGene mQTLs
cg14035969	chr13	30906806	30906805	exm1061000	30906583	30906583	0	3.29275e-16	0.248724	0.0271051	FALSE	-392	Promoter non-mGene mQTLs
cg13741783	chr13	31162375	31162374	rs41292155:31736511:C:G	31162374	31162374	0	5.32436e-23	0.556836	0.047407	TRUE	14	Promoter mGene mQTLs
cg04428648	chr13	31162422	31162421	rs117832986:31778996:A:G	31204859	31204859	0	2.3193e-08	0.193272	0.0327548	TRUE	-4923	Distal non-mGene mQTLs
cg20864796	chr13	32023941	32023940	rs140453183:32608707:G:T	32034570	32034570	0	1.47731e-09	1.66546	0.258348	TRUE	-3270	Distal non-mGene mQTLs
cg10696351	chr13	40653846	40653845	rs3900833:41188292:A:G	40614155	40614155	0	1.76242e-18	-0.224221	0.0223177	FALSE	52442	Distal mGene mQTLs
cg22829304	chr13	41193997	41193996	rs2039134:41767338:A:G	41193202	41193202	0	9.12883e-18	0.359359	0.0367637	FALSE	1364	Promoter mGene mQTLs
cg11847808	chr13	41455935	41455934	rs74534412:42030949:T:G	41456813	41456813	0	1.59948e-08	-0.48785	0.0816369	TRUE	746	Promoter non-mGene mQTLs
cg15806257	chr13	41945049	41945048	rs9532949:42494160:G:A	41920024	41920024	0	6.29423e-10	0.231819	0.0350669	FALSE	41096	Distal mGene mQTLs
cg24693760	chr13	42266830	42266829	rs9525601:42844718:A:G	42270582	42270582	0	1.66517e-17	-0.752413	0.077768	FALSE	1571	Promoter non-mGene mQTLs
cg14472042	chr13	42271365	42271364	rs9525601:42844718:A:G	42270582	42270582	0	4.90923e-13	-0.338916	0.0427902	FALSE	1571	Promoter mGene mQTLs
cg05035143	chr13	43023162	43023161	rs17553284:43597706:C:T	43023570	43023570	0	1.14324e-26	0.470006	0.0358311	FALSE	-367	Promoter mGene mQTLs
cg12504148	chr13	43023196	43023195	rs17553284:43597706:C:T	43023570	43023570	0	3.09122e-31	0.454522	0.0306236	FALSE	-367	Promoter mGene mQTLs
cg14729962	chr13	43023430	43023429	rs17553284:43597706:C:T	43023570	43023570	0	4.49813e-36	0.900207	0.0538628	FALSE	-367	Promoter mGene mQTLs
cg09677945	chr13	43023522	43023521	rs17553284:43597706:C:T	43023570	43023570	0	4.77704e-35	1.10528	0.0677622	FALSE	-367	Promoter mGene mQTLs
cg15988970	chr13	43023601	43023600	rs17553284:43597706:C:T	43023570	43023570	0	7.61276e-37	1.3814	0.081178	FALSE	-367	Promoter mGene mQTLs
cg12201399	chr13	43023128	43023127	exm1066537	43023729	43023729	0	1.18819e-24	0.307001	0.0248327	TRUE	-526	Promoter mGene mQTLs
cg14248883	chr13	44404542	44404541	rs1571936:44978623:G:A	44404487	44404487	0	6.03112e-15	-0.230143	0.0265036	FALSE	1497	Promoter mGene mQTLs
cg06877486	chr13	45120032	45120031	rs7987863:45694139:T:C	45120004	45120004	0	1.29247e-08	0.321114	0.053352	FALSE	511	Promoter mGene mQTLs
cg07252602	chr13	46053293	46053292	rs1087:46627439:A:T	46053304	46053304	0	9.77496e-11	0.127068	0.018251	FALSE	-545	Promoter mGene mQTLs
cg11342437	chr13	46552194	46552193	rs7337999:47143284:C:T	46569149	46569149	0	3.78457e-11	-0.151924	0.0212836	FALSE	-15981	Distal mGene mQTLs
cg19833103	chr13	46552417	46552416	rs7337999:47143284:C:T	46569149	46569149	0	1.65339e-11	-0.161897	0.0222084	FALSE	-15981	Distal mGene mQTLs
cg06473578	chr13	46556580	46556579	rs56737022:47150859:CTG:C	46576724	46576726	0	1.54785e-12	-0.210227	0.0272425	TRUE	-23556	Distal mGene mQTLs
cg12367389	chr13	46894020	46894019	rs9534511:47468580:T:C	46894445	46894445	0	1.57275e-12	-0.198165	0.0256889	TRUE	2631	Distal mGene mQTLs
cg26940725	chr13	48001549	48001548	rs35299472:48632829:T:C	48058693	48058693	0	8.31048e-13	-0.261724	0.0334371	FALSE	36438	Distal non-mGene mQTLs
cg18190225	chr13	48001762	48001761	rs35299472:48632829:T:C	48058693	48058693	0	9.20966e-32	-0.507983	0.0337688	FALSE	36438	Distal non-mGene mQTLs
cg05269298	chr13	48001792	48001791	rs35299472:48632829:T:C	48058693	48058693	0	1.71109e-18	-0.550289	0.054746	FALSE	36438	Distal non-mGene mQTLs
cg26544448	chr13	49444681	49444680	rs4942830:50019376:T:A	49445240	49445240	0	4.31036e-23	0.234227	0.0198832	TRUE	-866	Promoter mGene mQTLs
cg18886427	chr13	49691667	49691666	rs7319887:50265225:C:T	49691089	49691089	0	1.02487e-30	0.482635	0.0329579	FALSE	386	Promoter mGene mQTLs
cg03658251	chr13	49691715	49691714	rs7983905:50266544:A:G	49692408	49692408	0	2.48918e-22	0.362647	0.031547	FALSE	-933	Promoter mGene mQTLs
cg04663916	chr13	49691856	49691855	rs7983905:50266544:A:G	49692408	49692408	0	4.01688e-23	0.476419	0.0404033	FALSE	-933	Promoter mGene mQTLs
cg20399252	chr13	49692092	49692091	rs7983905:50266544:A:G	49692408	49692408	0	5.0049e-10	0.266117	0.0399905	FALSE	-933	Promoter mGene mQTLs
cg13158272	chr13	51815590	51815589	rs143283314:52389806:AC:A	51815670	51815671	0	4.03801e-08	0.293942	0.0507919	TRUE	29505	Distal non-mGene mQTLs
cg14380426	chr13	52454616	52454615	rs146952578:52504768:GT:G	51930632	51930633	1	4.07932e-07	-1.36568	0.257715	TRUE	81493	Distal non-mGene mQTLs
cg21393486	chr13	52026896	52026895	rs1886538:52569963:T:C	51995827	51995827	0	7.32361e-09	0.138262	0.0225461	FALSE	16298	Distal non-mGene mQTLs
cg02071074	chr13	52011148	52011147	rs73184330:52571856:G:C	51997720	51997720	0	2.5769e-14	0.193685	0.0229642	FALSE	14405	Distal mGene mQTLs
cg19638572	chr13	52127538	52127537	rs9535889:52733634:C:G	52159499	52159499	0	7.88457e-18	-0.406593	0.0414928	FALSE	362	Promoter non-mGene mQTLs
cg06906869	chr13	52160020	52160019	rs6561658:52734151:T:A	52160016	52160016	0	7.48218e-15	-0.213372	0.024677	FALSE	-155	Promoter mGene mQTLs
cg06965961	chr13	52599373	52599372	rs9526950:53174463:C:A	52600328	52600328	0	9.21357e-18	0.294104	0.0300925	FALSE	-286	Promoter non-mGene mQTLs
cg02246190	chr13	61415727	61415726	rs3812876:61989540:G:A	61415407	61415407	0	4.84587e-07	-0.115804	0.0220087	FALSE	115	Promoter mGene mQTLs
cg08705697	chr13	67230613	67230612	rs1570892:67803436:A:C	67229304	67229304	0	4.6743e-26	0.292163	0.022669	FALSE	1141	Promoter mGene mQTLs
cg24352054	chr13	67226774	67226773	rs56865872:67804735:T:TG	67230603	67230603	0	2.7787e-07	-0.11237	0.0208787	TRUE	-158	Promoter mGene mQTLs
cg16591502	chr13	75636703	75636702	rs2104300:76209164:C:A	75635028	75635028	0	6.10572e-08	-0.116137	0.0203685	TRUE	-14594	Distal mGene mQTLs
cg08579070	chr13	75635919	75635918	rs2224797:76210742:A:C	75636606	75636606	0	1.49989e-08	0.141843	0.0236847	TRUE	-16172	Distal mGene mQTLs
cg07847733	chr13	77697248	77697247	rs61963709:78271388:C:T	77697253	77697253	0	5.27774e-30	-0.462352	0.0321664	FALSE	601	Promoter mGene mQTLs
cg17541138	chr13	78609689	78609688	rs2765065:79182699:A:G	78608564	78608564	0	9.29277e-27	-0.442128	0.0336193	FALSE	-688875	Distal non-mGene mQTLs
cg08520986	chr13	78609798	78609797	rs2765065:79182699:A:G	78608564	78608564	0	4.98826e-34	-0.463522	0.0291246	FALSE	-688875	Distal non-mGene mQTLs
cg16288713	chr13	78660010	78660009	rs7319450:79232299:G:A	78658164	78658164	0	4.03936e-12	0.423146	0.0560816	FALSE	1015	Promoter mGene mQTLs
cg01819759	chr13	78660117	78660116	rs7319450:79232299:G:A	78658164	78658164	0	1.73113e-12	0.504534	0.0655502	FALSE	1015	Promoter mGene mQTLs
cg21964662	chr13	78660581	78660580	rs7319450:79232299:G:A	78658164	78658164	0	5.72278e-13	0.455091	0.057655	FALSE	1015	Promoter mGene mQTLs
cg05295671	chr13	78660219	78660218	rs146690443:79233443:A:G	78659308	78659308	0	3.47655e-07	0.201514	0.0377807	TRUE	-129	Promoter mGene mQTLs
cg21838488	chr13	78660301	78660300	rs146690443:79233443:A:G	78659308	78659308	0	2.81019e-12	0.372188	0.0489058	TRUE	-129	Promoter mGene mQTLs
cg12140530	chr13	80276668	80276667	rs504122	80337390	80337390	0	2.0659e-13	0.146258	0.018118	FALSE	3561	Distal non-mGene mQTLs
cg24450063	chr13	93224913	93224912	rs319522:93879087:G:A	93226834	93226834	0	4.96953e-07	0.166878	0.0317484	FALSE	8	Promoter non-mGene mQTLs
cg17351439	chr13	93235815	93235814	rs5805796:93888101:G:GC	93235848	93235848	0	2.4822e-18	-0.342461	0.0342794	TRUE	-9006	Distal mGene mQTLs
cg08518150	chr13	94121605	94121604	rs71126432:94748989:C:CA	94096735	94096735	0	1.189e-17	-0.373109	0.0383423	TRUE	-869893	Distal mGene mQTLs
cg03342032	chr13	94073242	94073241	rs685049:94806953:A:T	94154699	94154699	0	1.73342e-13	0.78324	0.0966579	TRUE	-927857	Distal mGene mQTLs
cg11661263	chr13	94601647	94601646	rs3897473:95253920:T:G	94601666	94601666	0	2.16152e-11	0.201631	0.0278461	FALSE	237	Promoter mGene mQTLs
cg16325770	chr13	94706223	94706222	rs2253604:95364337:T:G	94712083	94712083	0	5.87512e-08	0.171368	0.0300131	FALSE	316	Promoter non-mGene mQTLs
cg24341515	chr13	97232126	97232125	rs34389698:97884347:CGAA:C	97232093	97232096	0	1.90103e-08	-0.0931107	0.0156728	FALSE	-10659	Distal mGene mQTLs
cg24039541	chr13	97290946	97290945	rs2389823:97929680:C:T	97277426	97277426	0	1.86883e-07	0.343761	0.062881	TRUE	-55992	Distal mGene mQTLs
cg06784689	chr13	97338858	97338857	rs9584549:97975600:T:G	97323346	97323346	0	4.1476e-08	-0.133996	0.023176	FALSE	-101912	Distal mGene mQTLs
cg06929724	chr13	97338869	97338868	rs9584549:97975600:T:G	97323346	97323346	0	4.41345e-09	-0.0960484	0.0154104	FALSE	-101912	Distal mGene mQTLs
cg20611680	chr13	99498726	99498725	rs34548643:100150907:GC:G	99498653	99498654	0	9.84142e-20	0.242178	0.0230188	FALSE	-129	Promoter non-mGene mQTLs
cg09676794	chr13	99657909	99657908	rs7323117	99648305	99648305	0	2.84859e-11	-0.411807	0.0572724	FALSE	-41636	Distal mGene mQTLs
cg19598875	chr13	100673939	100673938	rs9518129:101325335:G:C	100673081	100673081	0	1.86338e-09	0.209698	0.0327575	FALSE	2012	Promoter mGene mQTLs
cg09276445	chr13	101454073	101454072	rs4112527:102119656:T:C	101467305	101467305	0	2.37074e-07	-0.112444	0.020761	FALSE	-14712	Distal mGene mQTLs
cg02197918	chr13	102596856	102596855	rs7995964:103249221:A:G	102596871	102596871	0	2.25172e-12	0.124073	0.0162188	FALSE	132	Promoter mGene mQTLs
cg15831447	chr13	102597857	102597856	rs12430252:103250220:G:A	102597870	102597870	0	1.71358e-09	0.0874511	0.0136263	FALSE	-867	Promoter mGene mQTLs
cg13216423	chr13	106568523	106568522	rs3832891:107219670:C:CTTAT	106567322	106567322	0	3.48309e-07	-0.125287	0.0234911	TRUE	842	Promoter mGene mQTLs
cg07154771	chr13	107373748	107373747	rs4444189	107373320	107373320	0	2.12645e-21	0.269658	0.0241917	TRUE	493415	Distal mGene mQTLs
cg22302985	chr13	107868598	107868597	rs9559179:108520925:C:G	107868577	107868577	0	8.21011e-13	0.252367	0.0322329	FALSE	-1842	Promoter mGene mQTLs
cg09165893	chr13	109127402	109127401	rs3815983:109779906:C:T	109127558	109127558	0	5.11477e-08	0.14995	0.0261306	FALSE	-531406	Distal mGene mQTLs
cg00447632	chr13	110116337	110116336	rs2218471:110777939:C:G	110125592	110125592	0	4.49746e-08	-0.115653	0.0200612	FALSE	-2384	Promoter non-mGene mQTLs
cg15841412	chr13	110713206	110713205	rs9555726:111368316:C:T	110715969	110715969	0	8.0393e-11	0.181854	0.0259842	FALSE	-3233	Distal mGene mQTLs
cg25957967	chr13	110869968	110869967	rs2277424:111522420:C:T	110870073	110870073	0	2.89202e-14	0.395419	0.0469938	FALSE	178	Promoter non-mGene mQTLs
cg09072162	chr13	110870305	110870304	rs2277424:111522420:C:T	110870073	110870073	0	1.74298e-08	0.155	0.0260134	FALSE	178	Promoter non-mGene mQTLs
cg14947070	chr13	110869939	110869938	rs2277424:111522420:C:T	110870073	110870073	0	7.22725e-13	0.3093	0.0393908	FALSE	178	Promoter mGene mQTLs
cg26911804	chr13	111153875	111153874	rs3809339:111805758:T:A	111153411	111153411	0	1.92143e-08	0.0708573	0.0119313	FALSE	-38852	Distal mGene mQTLs
cg09129334	chr13	111185330	111185329	13:111871992:GT:G	111219645	111219646	0	6.56682e-08	-0.135658	0.0238553	TRUE	-105086	Distal mGene mQTLs
cg26112799	chr13	111241125	111241124	rs7982732:111880815:G:A	111228468	111228468	0	3.81269e-15	0.193633	0.0220999	FALSE	-113909	Distal mGene mQTLs
cg08155972	chr13	112056235	112056234	rs1056121:112723232:G:C	112068918	112068918	0	4.2433e-07	0.187281	0.0353985	TRUE	-1271	Promoter non-mGene mQTLs
cg02820901	chr13	112697171	112697170	rs420431:113346317:C:G	112692003	112692003	0	3.10282e-07	-0.176667	0.0329706	FALSE	-1674	Promoter mGene mQTLs
cg21456212	chr13	112705523	112705522	rs420431:113346317:C:G	112692003	112692003	0	4.14052e-09	0.234198	0.0374999	FALSE	-1674	Promoter mGene mQTLs
cg19293163	chr13	112726618	112726617	rs282576	112704550	112704550	0	2.80682e-09	-0.244109	0.038615	TRUE	-14221	Distal mGene mQTLs
cg23333920	chr13	112757184	112757183	rs149573354:113365278:G:GCCAC	112710964	112710964	0	1.7334e-08	-0.262795	0.0440961	TRUE	-20635	Distal mGene mQTLs
cg04432875	chr13	112757248	112757247	rs149573354:113365278:G:GCCAC	112710964	112710964	0	1.06024e-09	-0.235875	0.0362289	TRUE	-20635	Distal mGene mQTLs
cg07102397	chr13	112908157	112908156	rs4907558:113561399:A:G	112907085	112907085	0	3.23458e-12	-0.254939	0.0336106	TRUE	-12707	Distal non-mGene mQTLs
cg06749277	chr13	112958959	112958958	rs2317136:113613823:A:T	112959509	112959509	0	3.24507e-08	0.123938	0.0212512	FALSE	-65131	Distal non-mGene mQTLs
cg00626853	chr13	112960002	112960001	rs11620010:113614038:C:G	112959724	112959724	0	2.58661e-10	-0.154441	0.0227799	FALSE	-65346	Distal non-mGene mQTLs
cg02223067	chr13	112968920	112968919	rs9604007:113623255:G:C	112968941	112968941	0	2.46553e-12	0.116123	0.0152118	FALSE	-74563	Distal mGene mQTLs
cg17982866	chr13	112983382	112983381	rs2993283:113635345:G:A	112981031	112981031	0	4.05427e-09	0.112615	0.01802	FALSE	-86653	Distal mGene mQTLs
cg12979844	chr13	112533601	112533600	rs141437420:113660448:C:T	113006134	113006134	0	4.90688e-08	-0.484643	0.0843292	TRUE	-111756	Distal non-mGene mQTLs
cg22353206	chr13	112054943	112054942	13:113663300:C:T	113008986	113008986	0	5.93114e-11	0.700758	0.0993269	TRUE	-208	Promoter non-mGene mQTLs
cg20248056	chr13	113050663	113050662	rs71446933:113704603:A:T	113050289	113050289	0	3.28317e-09	-0.0842353	0.01339	FALSE	-155911	Distal mGene mQTLs
cg08143875	chr13	113130350	113130349	rs3211736:113783990:C:T	113129676	113129676	0	5.30761e-08	0.123374	0.0215281	TRUE	-6862	Distal mGene mQTLs
cg09885657	chr13	113137684	113137683	rs3211764:113792390:G:C	113138076	113138076	0	7.53861e-07	-0.14227	0.0275454	FALSE	-15262	Distal mGene mQTLs
cg10791191	chr13	113356808	113356807	rs75806219:114011135:A:G	113356820	113356820	0	4.51176e-20	0.526205	0.049416	FALSE	-5147	Distal mGene mQTLs
cg21489964	chr13	113351636	113351635	rs9549753:114018038:C:A	113363723	113363723	0	2.01195e-11	0.20914	0.0288308	FALSE	-12050	Distal mGene mQTLs
cg27031031	chr13	113351645	113351644	rs9549753:114018038:C:A	113363723	113363723	0	2.85394e-10	0.127992	0.0189306	FALSE	-12050	Distal mGene mQTLs
cg17515767	chr13	113433207	113433206	rs4907641:114087503:G:A	113433188	113433188	0	1.66726e-12	-0.180697	0.0234561	FALSE	20336	Distal mGene mQTLs
cg02925187	chr13	114120721	114120720	rs11841253:114865784:C:G	114100309	114100309	0	2.81045e-08	-0.252595	0.0430945	TRUE	32302	Distal mGene mQTLs
cg19815871	chr13	114096215	114096214	rs11616371:114886073:G:A	114120598	114120598	0	7.93806e-07	0.134483	0.0260951	TRUE	12013	Distal mGene mQTLs
cg23241772	chr13	114096401	114096400	rs11616371:114886073:G:A	114120598	114120598	0	1.24483e-06	0.159807	0.0316221	TRUE	12013	Distal mGene mQTLs
cg08196138	chr13	114064803	114064802	rs68108676:114887101:T:C	114121626	114121626	0	3.12378e-08	0.33012	0.056529	TRUE	10985	Distal mGene mQTLs
cg25117142	chr13	114124476	114124475	rs7324447:114889995:A:G	114124520	114124520	0	3.91134e-07	-0.261069	0.0491812	FALSE	8091	Distal mGene mQTLs
cg08610076	chr13	114124542	114124541	rs9525276:114890515:C:T	114125040	114125040	0	1.18324e-12	0.383566	0.049399	FALSE	7571	Distal mGene mQTLs
cg17110261	chr13	114124713	114124712	rs9525276:114890515:C:T	114125040	114125040	0	8.04654e-14	0.313703	0.0380846	FALSE	7571	Distal mGene mQTLs
cg18899035	chr14	20343405	20343404	rs3093869:20810350:T:TTTTC	20342191	20342191	0	1.23985e-17	0.579872	0.0596327	FALSE	1391	Promoter mGene mQTLs
cg15035713	chr14	20413412	20413411	rs1713434:20881527:T:C	20413368	20413368	0	5.19519e-11	0.140946	0.0199088	TRUE	61	Promoter mGene mQTLs
cg18924965	chr14	20683337	20683336	rs2067689:21149930:T:C	20681771	20681771	0	7.89304e-17	0.403513	0.0428549	FALSE	2406	Promoter mGene mQTLs
cg04334406	chr14	20683351	20683350	rs2067689:21149930:T:C	20681771	20681771	0	1.13944e-15	0.456	0.0508541	FALSE	2406	Promoter mGene mQTLs
cg04880732	chr14	21071286	21071285	rs11629332:21564434:T:A	21096275	21096275	0	6.16742e-12	-0.154526	0.0206892	FALSE	-26005	Distal non-mGene mQTLs
cg20651314	chr14	22478883	22478882	rs227859	22479482	22479482	0	2.40603e-11	0.154906	0.0214512	FALSE	-1775	Promoter non-mGene mQTLs
cg04491808	chr14	22845820	22845819	rs2331621:22966625:A:G	22497640	22497640	0	2.15668e-16	-1.70312	0.184172	TRUE	-1727	Promoter non-mGene mQTLs
cg25107893	chr14	22506502	22506501	rs6572494:22973042:G:C	22504056	22504056	0	7.92945e-14	0.160109	0.0194317	FALSE	-2455	Promoter non-mGene mQTLs
cg16848272	chr14	22506263	22506262	rs11377724:22973212:T:TG	22504226	22504226	0	3.84684e-10	0.164061	0.02447	FALSE	-1995	Promoter non-mGene mQTLs
cg14793596	chr14	22509747	22509746	rs1483973:22978760:C:T	22509777	22509777	0	2.90461e-07	-0.280642	0.0522364	TRUE	-2111	Promoter non-mGene mQTLs
cg00970622	chr14	22547386	22547385	rs227030:22986656:T:G	22517678	22517678	0	1.13889e-10	0.237601	0.0342674	FALSE	-2055	Promoter non-mGene mQTLs
cg02349066	chr14	22527194	22527193	rs12588667	22519593	22519593	0	2.11964e-07	0.184346	0.033887	TRUE	-1147	Promoter non-mGene mQTLs
cg04831900	chr14	22544690	22544689	rs56031439:23013878:C:T	22544934	22544934	0	5.3785e-19	-0.315357	0.0307899	FALSE	-1755	Promoter non-mGene mQTLs
cg23733394	chr14	22547339	22547338	rs56298757:23016457:C:G	22547516	22547516	0	4.92614e-11	-0.272381	0.0384207	FALSE	-2479	Promoter non-mGene mQTLs
cg01789792	chr14	22547369	22547368	rs56298757:23016457:C:G	22547516	22547516	0	3.9043e-13	-0.225371	0.0283102	FALSE	-2479	Promoter non-mGene mQTLs
cg17798347	chr14	22557626	22557625	rs149800746:23026206:T:TC	22557312	22557312	0	3.32888e-19	0.234886	0.0227579	TRUE	-672	Promoter non-mGene mQTLs
cg17436224	chr14	22829896	22829895	exm1088798	22829926	22829926	0	1.94192e-18	0.18537	0.0184801	FALSE	-47	Promoter mGene mQTLs
cg11344156	chr14	22883296	22883295	rs2877492:23352386:C:G	22883177	22883177	0	4.97137e-08	0.137666	0.0239656	TRUE	-12	Promoter mGene mQTLs
cg19559891	chr14	22930391	22930390	rs3811185:23369378:T:C	22900169	22900169	0	4.34502e-08	0.0833791	0.0144452	TRUE	19015	Distal non-mGene mQTLs
cg21807240	chr14	22956562	22956561	rs80221219:23425817:G:A	22956608	22956608	0	1.94887e-11	-0.956158	0.131705	TRUE	553	Promoter mGene mQTLs
cg09084712	chr14	23017871	23017870	rs8015600:23489788:A:G	23020579	23020579	0	1.86464e-09	-0.3799	0.0593464	TRUE	3638	Distal non-mGene mQTLs
cg22352176	chr14	23057296	23057295	rs8020463:23504783:A:G	23035574	23035574	0	2.62149e-08	-0.160254	0.0272743	TRUE	-344	Promoter non-mGene mQTLs
cg04332058	chr14	23079579	23079578	rs2331832:23565603:C:T	23096394	23096394	0	1.35866e-46	-2.03148	0.0965774	FALSE	-780	Promoter mGene mQTLs
cg12382960	chr14	23093946	23093945	rs7160161	23101213	23101213	0	3.40283e-12	-0.209087	0.0275986	FALSE	3779	Distal non-mGene mQTLs
cg19473656	chr14	23154455	23154454	rs8011016:23624583:C:T	23155374	23155374	0	9.43903e-11	0.465425	0.0667873	FALSE	28300	Distal mGene mQTLs
cg00299257	chr14	23183693	23183692	rs761875:23656881:C:A	23187672	23187672	0	2.30205e-07	0.115743	0.0213454	FALSE	-2356	Promoter non-mGene mQTLs
cg27395614	chr14	23320483	23320482	rs2295124:23755598:A:G	23286389	23286389	0	1.07974e-11	0.207581	0.0281753	FALSE	13058	Distal non-mGene mQTLs
cg07447157	chr14	23286841	23286840	rs2295125:23755607:A:G	23286398	23286398	0	1.16876e-08	0.146283	0.0242232	FALSE	13049	Distal mGene mQTLs
cg00846580	chr14	23550905	23550904	rs7159262:24020127:A:C	23550918	23550918	0	9.56689e-09	0.166822	0.0274418	FALSE	-39158	Distal non-mGene mQTLs
[truncated: 4,835 more rows]

## Sheet: SE
CpG	chr	CpG_start	CpG_end	snp	hg38_pos_start	hg38_pos_end	Rank	Backward_nom_pval	Backward_slope	Backward_slope_se	Retina_specific	TSS-variant_Distance	Type
cg17405058	chr1	1301824	1301823	rs11260584:1239339:T:G	1303959	1303959	0	8.09858e-12	0.39203	0.0528367	FALSE	5650	Distal mGene mQTLs
cg05397857	chr1	1369791	1369790	rs12410087:1239935:A:C	1304555	1304555	0	1.00701e-18	0.310028	0.0305777	FALSE	4012	Distal non-mGene mQTLs
cg15827003	chr1	1891474	1891473	GIANT-BMI-Euro-Sex-Combined_chr1_1723031	1791592	1791592	0	6.55571e-08	0.216549	0.0380776	FALSE	168086	Distal mGene mQTLs
cg10013316	chr1	3611064	3611063	rs60020855:3528292:GC:G	3611728	3611729	0	2.14788e-08	-0.11811	0.019964	TRUE	-233	Promoter mGene mQTLs
cg14200305	chr1	3645559	3645558	rs137965653:3546264:CCGGG:C	3629700	3629704	0	2.72035e-09	0.172484	0.0272584	FALSE	-18205	Distal non-mGene mQTLs
cg24643429	chr1	3645866	3645865	rs137965653:3546264:CCGGG:C	3629700	3629704	0	1.67318e-07	0.203564	0.0370767	FALSE	-18205	Distal non-mGene mQTLs
cg26105278	chr1	3707491	3707490	rs3819967	3716816	3716816	0	3.01184e-08	-0.143152	0.0244818	FALSE	-64296	Distal mGene mQTLs
cg04289045	chr1	3858542	3858541	rs12736124:3743995:G:A	3827431	3827431	0	8.2091e-09	-0.184905	0.0302644	FALSE	29783	Distal non-mGene mQTLs
cg22157494	chr1	3858264	3858263	rs12755519:3750075:T:C	3833511	3833511	0	1.09486e-08	-0.256493	0.0423809	TRUE	23703	Distal non-mGene mQTLs
cg00889473	chr1	3858435	3858434	rs34966926:3751728:G:GT	3835164	3835164	0	4.37814e-11	-0.279893	0.0393595	TRUE	22050	Distal mGene mQTLs
cg12744321	chr1	3858771	3858770	rs34966926:3751728:G:GT	3835164	3835164	0	1.37202e-11	-0.225811	0.030832	TRUE	22103	Distal mGene mQTLs
cg06178315	chr1	3858295	3858294	rs12131756:3778238:C:T	3861674	3861674	0	5.53592e-08	-0.257738	0.0450426	FALSE	-4460	Distal non-mGene mQTLs
cg00489772	chr1	3858515	3858514	rs12131756:3778238:C:T	3861674	3861674	0	1.41607e-12	-0.322172	0.0416636	FALSE	-4460	Distal non-mGene mQTLs
cg01096738	chr1	5993683	5993682	rs141175835:6052074:C:CCCA	5992014	5992014	0	3.17322e-15	-0.132937	0.0151185	TRUE	459	Promoter mGene mQTLs
cg09696653	chr1	7705294	7705293	rs12119962:7742501:C:T	7682441	7682441	0	3.58071e-17	0.218173	0.0228509	FALSE	-897117	Distal mGene mQTLs
cg25763306	chr1	7681157	7681156	rs12747548:7744856:T:C	7684796	7684796	0	1.50593e-31	0.888834	0.0594085	FALSE	-899472	Distal mGene mQTLs
cg19795711	chr1	8168324	8168323	rs149997714:7761132:T:C	7701072	7701072	0	1.89827e-07	0.481085	0.0880541	TRUE	-2200	Distal non-mGene mQTLs
cg11633926	chr1	7671947	7671946	rs2995035:7775092:G:C	7715032	7715032	0	1.73983e-07	-0.125326	0.0228612	TRUE	-929708	Distal mGene mQTLs
cg27642159	chr1	6806897	6806896	rs142501097:7780245:CT:C	7720185	7720186	0	8.93038e-07	-0.539662	0.105248	TRUE	-934861	Distal mGene mQTLs
cg23228279	chr1	7697315	7697314	rs34351762:7782533:C:CAGTT	7722473	7722473	0	1.14391e-08	-0.116776	0.0193232	FALSE	-937149	Distal mGene mQTLs
cg01444397	chr1	7784391	7784390	rs2071987	7773966	7773966	0	5.96618e-24	0.300299	0.0248161	FALSE	10354	Distal mGene mQTLs
cg26816564	chr1	7770993	7770992	rs4908694:7850898:C:T	7790838	7790838	0	5.241e-26	0.495104	0.0384708	FALSE	-19569	Distal mGene mQTLs
cg08764927	chr1	7784836	7784835	1:7856379:C:CT	7796319	7796319	0	4.1956e-07	0.168759	0.0318829	TRUE	-11999	Distal mGene mQTLs
cg03281911	chr1	8438685	8438684	rs880320:8427002:C:A	8366942	8366942	0	3.63884e-07	-0.180743	0.0339491	TRUE	450701	Distal mGene mQTLs
cg19295092	chr1	8031676	8031675	rs11589090:8525615:C:T	8465555	8465555	0	4.50193e-07	0.150446	0.0285055	TRUE	46364	Distal non-mGene mQTLs
cg20609715	chr1	8598523	8598522	rs80243135:8542448:A:C	8482388	8482388	0	2.56119e-07	0.12418	0.0229983	FALSE	335255	Distal mGene mQTLs
cg24276315	chr1	8483177	8483176	rs34947776:8586352:CT:C	8526293	8526294	0	2.78708e-10	-0.151586	0.0224054	TRUE	291350	Distal mGene mQTLs
cg18507560	chr1	8526239	8526238	rs2297867	8526504	8526504	0	2.22709e-20	0.228542	0.0212324	FALSE	291139	Distal mGene mQTLs
cg18783781	chr1	9539009	9539008	rs181715706:9595643:T:C	9535584	9535584	0	5.32571e-10	0.242314	0.0364784	TRUE	3898	Distal mGene mQTLs
cg02425407	chr1	9842930	9842929	rs12725898:9903548:G:T	9843490	9843490	0	1.6915e-07	0.0929231	0.016932	FALSE	-62668	Distal non-mGene mQTLs
cg01994208	chr1	9848170	9848169	rs1660735:9945538:C:T	9885480	9885480	0	6.11798e-08	0.141262	0.0247768	TRUE	-104658	Distal non-mGene mQTLs
cg02481619	chr1	9943241	9943240	rs11121515:10125765:C:T	10065707	10065707	0	2.20814e-07	-0.185742	0.0341986	TRUE	-32875	Distal non-mGene mQTLs
cg23866255	chr1	10033423	10033422	rs138009294:10152280:CTT:C	10092222	10092224	0	2.38354e-20	0.558217	0.0519138	TRUE	-59390	Distal mGene mQTLs
cg08737543	chr1	10058709	10058708	rs61782927:10214089:A:G	10154031	10154031	0	2.823e-22	-1.59697	0.139169	FALSE	-121199	Distal mGene mQTLs
cg08496872	chr1	10230215	10230214	rs6670208:10252667:C:T	10192609	10192609	0	1.28338e-22	-0.304818	0.0262705	FALSE	18196	Distal mGene mQTLs
cg25758009	chr1	10230226	10230225	rs61784570:10258343:C:A	10198285	10198285	0	4.07813e-19	-0.303438	0.0294952	FALSE	12520	Distal mGene mQTLs
cg10582871	chr1	10665276	10665275	rs111473432:10288104:G:A	10228046	10228046	0	2.07632e-08	-0.34555	0.0583399	TRUE	-328	Distal non-mGene mQTLs
cg23975251	chr1	10544390	10544389	rs202087283:10563364:G:A	10503307	10503307	0	1.83634e-17	-0.422507	0.0437431	TRUE	-31019	Distal mGene mQTLs
cg23863608	chr1	10553062	10553061	rs202087283:10563364:G:A	10503307	10503307	0	1.86231e-25	-0.343324	0.0271111	TRUE	-31019	Distal mGene mQTLs
cg27571230	chr1	10497202	10497201	rs2847344:10564675:G:A	10504618	10504618	0	5.51724e-19	-0.307562	0.0300411	TRUE	-32330	Distal mGene mQTLs
cg20329303	chr1	10635962	10635961	NHGRI_notinECorHUNT_chr1_10566215	10506158	10506158	0	9.23563e-07	-0.132858	0.0259484	FALSE	-93927	Distal non-mGene mQTLs
cg25667751	chr1	10507630	10507629	rs2506879:10566668:A:G	10506611	10506611	0	5.19372e-21	0.682677	0.0620542	FALSE	-34323	Distal mGene mQTLs
cg12806121	chr1	10541333	10541332	rs60354536:10569000:C:CT	10508943	10508943	0	1.41922e-21	-0.427167	0.0380973	TRUE	-36655	Distal mGene mQTLs
cg12830684	chr1	10553484	10553483	rs60354536:10569000:C:CT	10508943	10508943	0	1.97553e-23	-0.577583	0.0485089	TRUE	-36655	Distal mGene mQTLs
cg05454781	chr1	10591288	10591287	rs60354536:10569000:C:CT	10508943	10508943	0	4.12035e-19	-0.252622	0.0245597	TRUE	-36655	Distal mGene mQTLs
cg01834541	chr1	10591745	10591744	rs60354536:10569000:C:CT	10508943	10508943	0	7.44014e-31	-0.575182	0.0391363	TRUE	-36655	Distal mGene mQTLs
cg12944311	chr1	10599850	10599849	rs60354536:10569000:C:CT	10508943	10508943	0	4.1759e-14	-0.319009	0.038201	TRUE	-36655	Distal mGene mQTLs
cg09319435	chr1	10626219	10626218	rs60354536:10569000:C:CT	10508943	10508943	0	1.4766e-20	-0.265763	0.0245374	TRUE	-36655	Distal mGene mQTLs
cg06080068	chr1	10507743	10507742	rs3215946:10574185:GA:G	10514128	10514129	0	5.9613e-20	0.291277	0.0274714	TRUE	-41840	Distal mGene mQTLs
cg17425144	chr1	10507507	10507506	rs7419116:10578606:G:A	10518549	10518549	0	3.66939e-24	0.255009	0.020937	FALSE	-46261	Distal mGene mQTLs
cg04585221	chr1	10613162	10613161	rs1411402:10579545:G:T	10519488	10519488	0	2.38437e-19	-0.44145	0.042546	FALSE	-47200	Distal mGene mQTLs
cg21931713	chr1	10623772	10623771	rs1411402:10579545:G:T	10519488	10519488	0	1.99361e-08	-0.132441	0.0223292	FALSE	-47200	Distal mGene mQTLs
cg24294013	chr1	10541777	10541776	rs2483677:10580891:C:T	10520834	10520834	0	1.20255e-18	-0.429847	0.0425178	FALSE	-48546	Distal mGene mQTLs
cg01063935	chr1	10556029	10556028	rs2483677:10580891:C:T	10520834	10520834	0	8.85851e-19	-0.384781	0.0378716	FALSE	-48546	Distal mGene mQTLs
cg23987244	chr1	10594962	10594961	rs2483677:10580891:C:T	10520834	10520834	0	2.71976e-22	-0.490319	0.0427068	FALSE	-48546	Distal mGene mQTLs
cg15554126	chr1	10630387	10630386	rs2483677:10580891:C:T	10520834	10520834	0	4.64727e-18	-0.269839	0.0272932	FALSE	-48546	Distal mGene mQTLs
cg07357157	chr1	10630532	10630531	rs2483677:10580891:C:T	10520834	10520834	0	4.27838e-19	-0.22167	0.0215636	FALSE	-48546	Distal mGene mQTLs
cg23072051	chr1	10605459	10605458	rs2506885:10581051:A:T	10520994	10520994	0	7.18122e-11	-0.180915	0.0257728	TRUE	-48706	Distal mGene mQTLs
cg00391821	chr1	10506831	10506830	rs7548453:10589836:A:G	10529779	10529779	0	1.13719e-06	0.109046	0.0214918	TRUE	-57491	Distal mGene mQTLs
cg04607379	chr1	10616778	10616777	rs2026792:10594790:A:G	10534733	10534733	0	5.43201e-20	-0.360861	0.0339854	FALSE	-62445	Distal mGene mQTLs
cg26362368	chr1	10615567	10615566	rs2506892:10598216:G:A	10538159	10538159	0	1.32246e-22	-0.527352	0.0454686	FALSE	-65871	Distal mGene mQTLs
cg27182133	chr1	10598091	10598090	rs2150038:10609973:G:T	10549916	10549916	0	1.41743e-10	-0.203456	0.0295171	FALSE	-77628	Distal mGene mQTLs
cg09175915	chr1	10623521	10623520	rs112436634:10637709:C:T	10577652	10577652	0	5.52262e-07	-0.138053	0.0263799	FALSE	-105364	Distal mGene mQTLs
cg09165170	chr1	10541523	10541522	rs284305:10682244:C:T	10622187	10622187	1	9.41662e-08	1.60762	0.286487	FALSE	-149899	Distal mGene mQTLs
cg22608619	chr1	10643175	10643174	rs146039805:10703203:G:GC	10643146	10643146	0	1.09419e-19	0.427391	0.0406903	FALSE	153504	Distal mGene mQTLs
cg18878351	chr1	10649287	10649286	rs1796630:10711278:C:T	10651221	10651221	0	3.33844e-09	-0.212258	0.033758	FALSE	145429	Distal mGene mQTLs
cg07643626	chr1	10785805	10785804	rs6660242:10845840:G:A	10785783	10785783	0	1.2231e-07	-0.174589	0.0314201	FALSE	10867	Distal mGene mQTLs
cg04944659	chr1	10831475	10831474	rs616724:10894981:T:G	10834924	10834924	0	1.27037e-12	0.315888	0.0407491	FALSE	-362636	Distal non-mGene mQTLs
cg11868231	chr1	10861302	10861301	rs1280993:10921228:T:C	10861171	10861171	0	4.48768e-12	0.424765	0.0564379	TRUE	-388883	Distal non-mGene mQTLs
cg22487516	chr1	10861395	10861394	rs1280993:10921228:T:C	10861171	10861171	0	8.17668e-12	0.420462	0.0566819	FALSE	-388883	Distal non-mGene mQTLs
cg22016747	chr1	11594905	11594904	rs140223564:11560335:A:T	11500278	11500278	0	1.22968e-07	0.457964	0.082435	TRUE	-21112	Distal non-mGene mQTLs
cg19267254	chr1	15501581	15501580	1:15956091:CAA:C	15629596	15629598	0	3.49569e-08	0.131141	0.0225452	TRUE	-25970	Distal non-mGene mQTLs
cg16109817	chr1	15835715	15835714	rs6666548:16162554:G:C	15836059	15836059	0	1.75285e-25	0.460508	0.0363364	FALSE	12088	Distal mGene mQTLs
cg14942617	chr1	16152555	16152554	rs6603867	16148206	16148206	0	8.17243e-13	-0.267335	0.034141	FALSE	7881	Distal mGene mQTLs
cg20430773	chr1	16207663	16207662	rs221053:16533096:C:T	16206601	16206601	0	1.13902e-30	-0.447331	0.0305835	FALSE	6008	Distal mGene mQTLs
cg11895451	chr1	16207397	16207396	exm21605	16208151	16208151	0	3.50862e-17	-0.19631	0.0205537	FALSE	4458	Distal mGene mQTLs
cg20281040	chr1	16206569	16206568	rs221062:16536548:G:A	16210053	16210053	0	9.45191e-30	0.345257	0.0241813	FALSE	2556	Distal mGene mQTLs
cg06365898	chr1	16207413	16207412	rs12751725:16539577:G:A	16213082	16213082	1	3.06671e-07	0.64272	0.119891	FALSE	-473	Promoter mGene mQTLs
cg20611680	chr1	16227677	16227676	rs3795745:16557390:C:T	16230895	16230895	0	1.07151e-09	-0.168966	0.0259603	FALSE	-18286	Distal non-mGene mQTLs
cg03522107	chr1	16226835	16226834	rs3738631:16559541:C:G	16233046	16233046	0	1.85916e-09	-0.125729	0.0196392	FALSE	-20437	Distal non-mGene mQTLs
cg02987928	chr1	16226962	16226961	rs3738631:16559541:C:G	16233046	16233046	0	1.11851e-09	-0.171861	0.0264387	FALSE	-20437	Distal non-mGene mQTLs
cg17463745	chr1	16227908	16227907	rs11260710:16564863:A:G	16238368	16238368	0	1.95091e-07	-0.0950396	0.0174139	FALSE	-1206	Distal non-mGene mQTLs
cg20065512	chr1	16927937	16927936	rs35331284:17246587:AT:A	16920092	16920093	0	6.27265e-10	0.980531	0.148309	TRUE	-179819	Distal mGene mQTLs
cg27529520	chr1	17112235	17112234	rs1022579:17439195:A:C	17112700	17112700	0	3.8167e-21	0.667469	0.0603963	FALSE	6735	Distal mGene mQTLs
cg16835277	chr1	17113791	17113790	rs1022579:17439195:A:C	17112700	17112700	0	5.10958e-14	0.330063	0.0396908	FALSE	6735	Distal mGene mQTLs
cg25960632	chr1	17119824	17119823	rs12130579:17443793:T:A	17117298	17117298	0	1.41837e-07	0.285968	0.0517558	TRUE	2137	Promoter mGene mQTLs
cg15590113	chr1	17116486	17116485	rs35989645:17455376:AT:A	17128881	17128882	0	2.38275e-14	0.203501	0.0240895	TRUE	-9446	Distal mGene mQTLs
cg06004306	chr1	17098666	17098665	rs910223	17133360	17133360	0	5.2245e-19	0.544392	0.053127	FALSE	-13925	Distal mGene mQTLs
cg06900068	chr1	17099829	17099828	rs910223	17133360	17133360	0	1.84252e-07	0.195516	0.0357443	FALSE	-13925	Distal mGene mQTLs
cg00597915	chr1	17115310	17115309	rs910223	17133360	17133360	0	4.78921e-14	0.476456	0.0572178	FALSE	-13925	Distal mGene mQTLs
cg10233913	chr1	17119668	17119667	rs910223	17133360	17133360	0	1.09495e-07	0.269981	0.0483848	TRUE	-13925	Distal mGene mQTLs
cg00569276	chr1	17120051	17120050	rs910223	17133360	17133360	0	3.00005e-11	0.394967	0.0550031	FALSE	-13925	Distal mGene mQTLs
cg18879300	chr1	17120274	17120273	rs910223	17133360	17133360	0	2.66582e-09	0.203845	0.0321943	FALSE	-13925	Distal mGene mQTLs
cg07240000	chr1	17552044	17552043	rs2256114:17887963:T:C	17561468	17561468	0	9.08834e-12	0.148942	0.0201307	FALSE	-21633	Distal mGene mQTLs
cg21645973	chr1	17587576	17587575	exm23900	17587627	17587627	0	2.04185e-12	0.331392	0.0432206	FALSE	-47792	Distal mGene mQTLs
cg18177731	chr1	18922883	18922882	rs61759277:19252031:G:A	18925537	18925537	0	1.81039e-07	-0.442574	0.0808561	TRUE	31149	Distal mGene mQTLs
cg14656657	chr1	18960227	18960226	rs4912013	18958070	18958070	0	5.99774e-12	0.207798	0.027803	FALSE	-1384	Distal non-mGene mQTLs
cg25326069	chr1	19423350	19423349	rs12730973:19709918:A:G	19383424	19383424	0	1.83206e-12	0.188753	0.0245555	TRUE	102115	Distal mGene mQTLs
cg22512634	chr1	19463347	19463346	rs1875325:19781545:G:T	19455051	19455051	0	5.54368e-11	0.173882	0.0246027	FALSE	30488	Distal mGene mQTLs
cg03384426	chr1	23958785	23958784	rs114172431:24286885:A:G	23960395	23960395	0	1.59754e-13	-0.348789	0.0429677	TRUE	-1286	Promoter mGene mQTLs
cg00693915	chr1	23963610	23963609	rs72540327:24288476:T:C	23961986	23961986	0	1.53233e-07	-0.206162	0.0374228	TRUE	-2877	Distal non-mGene mQTLs
cg04021497	chr1	23980802	23980801	rs72540327:24288476:T:C	23961986	23961986	0	1.20192e-17	0.388368	0.0399177	TRUE	-2877	Distal non-mGene mQTLs
cg27409662	chr1	23959053	23959052	rs140748141:24307980:GAA:G	23981490	23981492	0	1.43784e-17	0.283733	0.0292524	TRUE	-22381	Distal mGene mQTLs
cg22358066	chr1	23970362	23970361	rs140748141:24307980:GAA:G	23981490	23981492	0	4.71794e-16	0.177171	0.0194357	TRUE	-563	Distal non-mGene mQTLs
cg12569845	chr1	23951502	23951501	rs75910560:24322001:A:C	23995511	23995511	0	6.13102e-09	0.168463	0.0273137	TRUE	-36402	Distal non-mGene mQTLs
cg16924704	chr1	23980774	23980773	rs75910560:24322001:A:C	23995511	23995511	0	2.80217e-14	0.269164	0.0319683	TRUE	-14584	Distal mGene mQTLs
cg05446908	chr1	24730554	24730553	rs142838832:25076811:TGGTA:T	24750320	24750324	0	5.63705e-07	-0.144209	0.02758	TRUE	-4963	Distal non-mGene mQTLs
cg15741663	chr1	25320452	25320451	rs55794721:25561667:G:A	25235176	25235176	0	6.72781e-10	-0.336884	0.0510584	TRUE	-2674	Distal non-mGene mQTLs
cg22943243	chr1	25905821	25905820	rs213641:26232356:C:A	25905865	25905865	0	1.1583e-08	0.15057	0.0249255	FALSE	1126	Promoter mGene mQTLs
cg02803556	chr1	25934303	25934302	rs6698927:26260728:G:A	25934237	25934237	0	2.51646e-07	0.137466	0.0254409	FALSE	-27246	Distal non-mGene mQTLs
cg11226328	chr1	28886856	28886855	1:29207127:C:CA	28880615	28880615	0	5.28662e-08	0.202639	0.0353546	TRUE	6476	Distal mGene mQTLs
cg25287272	chr1	28886722	28886721	rs457618:29213316:A:C	28886804	28886804	0	6.10193e-11	0.202388	0.0287082	FALSE	287	Promoter mGene mQTLs
cg03131236	chr1	29217701	29217700	rs139233377:29535724:ACTTACC:A	29209212	29209218	0	8.05644e-07	-0.262421	0.0509527	TRUE	21730	Distal mGene mQTLs
cg24013909	chr1	29249194	29249193	rs139121461:29575675:C:CACAT	29249163	29249163	0	8.51617e-18	0.36528	0.0373254	TRUE	-12647	Distal mGene mQTLs
cg01115565	chr1	29257711	29257710	rs145141770:29583733:G:GAAGT	29257221	29257221	0	7.32698e-18	-0.255512	0.0260427	FALSE	-20705	Distal mGene mQTLs
cg16007395	chr1	32765470	32765469	rs35154516:33396689:C:CA	32931088	32931088	0	3.2666e-07	-0.135782	0.025393	TRUE	33597	Distal non-mGene mQTLs
cg26406441	chr1	32961541	32961540	rs200136829:33401363:C:CT	32935762	32935762	0	2.12773e-07	-0.303231	0.0557491	TRUE	28923	Distal mGene mQTLs
cg14806693	chr1	32940242	32940241	rs171837:33404367:C:T	32938766	32938766	0	1.51167e-20	0.486279	0.0449132	FALSE	25919	Distal mGene mQTLs
cg04906435	chr1	32961207	32961206	rs171837:33404367:C:T	32938766	32938766	0	1.66193e-08	0.21086	0.0353312	FALSE	25919	Distal mGene mQTLs
cg00843917	chr1	32949647	32949646	rs194644	32943950	32943950	0	3.19116e-11	0.212253	0.0296052	FALSE	20735	Distal mGene mQTLs
cg10120255	chr1	32961140	32961139	rs35049190:33420339:C:CA	32954738	32954738	0	7.04624e-13	0.233106	0.0296702	TRUE	9947	Distal mGene mQTLs
cg20340029	chr1	32949623	32949622	rs367613864:33421349:CA:C	32955748	32955749	0	6.94191e-07	0.14367	0.0277189	TRUE	8937	Distal mGene mQTLs
cg26266099	chr1	32926038	32926037	rs194670:33440699:C:T	32975098	32975098	0	1.07335e-18	0.425873	0.0420469	TRUE	-1545	Distal non-mGene mQTLs
cg03331207	chr1	33318137	33318136	exm2251422	33330480	33330480	0	1.14372e-10	0.139311	0.0200941	FALSE	-23132	Distal non-mGene mQTLs
cg11401957	chr1	33709570	33709569	rs6668431:33796879:G:A	33331278	33331278	0	4.52526e-07	-0.355156	0.0673068	TRUE	-23930	Distal non-mGene mQTLs
cg25334541	chr1	33442401	33442400	rs10914687:33813755:C:T	33348154	33348154	0	4.996e-13	-0.285453	0.0360543	FALSE	2198	Distal non-mGene mQTLs
cg27180860	chr1	35717555	35717554	rs11264194:36195372:C:T	35729771	35729771	0	1.61592e-07	0.285886	0.0520007	FALSE	-10299	Distal mGene mQTLs
cg02703525	chr1	35717685	35717684	rs11264194:36195372:C:T	35729771	35729771	0	3.47219e-08	0.389373	0.0669234	FALSE	-10299	Distal mGene mQTLs
cg02927292	chr1	36036217	36036216	rs272821:36678116:C:A	36212515	36212515	0	6.01219e-09	1.03463	0.167644	TRUE	11901	Distal non-mGene mQTLs
cg20948151	chr1	36398338	36398337	rs56690092:36860394:AAG:A	36394793	36394795	0	2.59724e-19	-0.360613	0.0348021	FALSE	3099	Distal mGene mQTLs
cg01773061	chr1	36397407	36397406	rs55690968:36862566:G:GA	36396965	36396965	0	1.68866e-15	0.141529	0.0159018	TRUE	927	Promoter mGene mQTLs
cg15387272	chr1	36397909	36397908	rs6425986:36863523:A:G	36397922	36397922	0	2.37579e-07	0.45462	0.0839457	FALSE	-30	Promoter mGene mQTLs
cg23623880	chr1	39105328	39105327	rs2282232	39103093	39103093	0	4.99727e-31	0.693908	0.0470041	FALSE	-21777	Distal mGene mQTLs
cg05374241	chr1	39332429	39332428	rs5773652:39681115:G:GT	39215443	39215443	0	2.31038e-09	0.171569	0.0269777	TRUE	-134127	Distal mGene mQTLs
cg23639565	chr1	40042186	40042185	rs11806616:40507145:C:A	40041473	40041473	0	3.42296e-08	0.287969	0.0494698	FALSE	-1240	Promoter mGene mQTLs
cg00695362	chr1	40040541	40040540	rs3131684:40512591:C:T	40046919	40046919	0	7.25953e-18	0.217745	0.0221898	FALSE	-6686	Distal mGene mQTLs
cg26681016	chr1	42959254	42959253	rs76657494:43412051:G:A	42946380	42946380	0	3.18573e-09	0.748699	0.118901	TRUE	12793	Distal mGene mQTLs
cg21615440	chr1	42959267	42959266	1:43414738:CAA:C	42949067	42949069	0	8.78239e-12	-0.409001	0.0552333	TRUE	10106	Distal mGene mQTLs
cg06792911	chr1	42959352	42959351	rs17387775	42950462	42950462	0	9.19843e-31	-0.593106	0.0404523	FALSE	8711	Distal mGene mQTLs
cg12656391	chr1	42959486	42959485	rs17387775	42950462	42950462	0	2.77575e-40	-0.963446	0.0523772	FALSE	8711	Distal mGene mQTLs
cg09003612	chr1	42959552	42959551	rs17387775	42950462	42950462	0	1.86282e-51	-1.16051	0.0500494	FALSE	8711	Distal mGene mQTLs
cg03128534	chr1	42958306	42958305	rs3738515:43426621:G:C	42960950	42960950	0	2.12663e-21	0.165558	0.0148527	FALSE	-1777	Promoter mGene mQTLs
cg07803811	chr1	42958311	42958310	rs3738515:43426621:G:C	42960950	42960950	0	2.52169e-16	0.179919	0.0195115	FALSE	-1777	Promoter mGene mQTLs
cg13666471	chr1	43783816	43783815	rs917294:44249485:A:G	43783814	43783814	0	1.53366e-19	0.535628	0.0512651	FALSE	-77990	Distal mGene mQTLs
cg18446895	chr1	43933215	43933214	rs34224911:44258341:A:T	43792670	43792670	0	6.38176e-07	0.148841	0.0286147	FALSE	-86846	Distal non-mGene mQTLs
cg06207804	chr1	43933327	43933326	rs246776	43809028	43809028	0	2.34334e-07	0.100518	0.0185507	FALSE	-103204	Distal non-mGene mQTLs
cg20452714	chr1	43933398	43933397	rs12120287:44275686:A:G	43810015	43810015	0	2.42171e-07	-0.209058	0.0386319	TRUE	-104191	Distal non-mGene mQTLs
cg11837102	chr1	43804515	43804514	rs37465:44283272:T:C	43817600	43817600	0	4.99464e-07	0.122306	0.0232734	TRUE	-111776	Distal mGene mQTLs
cg06322035	chr1	43800980	43800979	rs37460:44288364:C:G	43822692	43822692	0	7.21549e-08	0.158966	0.0280508	TRUE	-116868	Distal mGene mQTLs
cg15962314	chr1	43934198	43934197	rs3791112:44379248:T:G	43913576	43913576	0	2.04684e-07	0.11738	0.0215476	FALSE	19744	Distal mGene mQTLs
cg13964099	chr1	43924705	43924704	rs4660262:44382524:G:A	43916852	43916852	0	3.06479e-23	0.348518	0.0294469	FALSE	-211028	Distal mGene mQTLs
cg23954153	chr1	43936682	43936681	rs12127737:44402565:G:A	43936893	43936893	0	1.3937e-08	-0.185461	0.0308916	FALSE	-3573	Distal mGene mQTLs
cg12908607	chr1	43936851	43936850	rs12127737:44402565:G:A	43936893	43936893	0	3.73745e-16	-0.570563	0.0623227	FALSE	-3573	Distal mGene mQTLs
cg24464789	chr1	43285827	43285826	rs7523468:44493795:A:G	44028123	44028123	0	1.15003e-06	0.107829	0.0212624	TRUE	2320	Distal non-mGene mQTLs
cg24553170	chr1	48777801	48777800	rs11205541:49254416:C:T	48788744	48788744	0	1.88028e-15	0.212602	0.0239364	FALSE	1235169	Distal mGene mQTLs
cg27535305	chr1	52926979	52926978	rs1242331:53392908:A:G	52927236	52927236	0	6.77001e-30	-0.575548	0.0401561	FALSE	-7	Promoter mGene mQTLs
cg08859206	chr1	52927103	52927102	rs1242331:53392908:A:G	52927236	52927236	0	7.56753e-22	-0.654277	0.057825	FALSE	-7	Promoter mGene mQTLs
cg25767906	chr1	52927110	52927109	rs1242331:53392908:A:G	52927236	52927236	0	3.29064e-27	-0.677413	0.0508564	FALSE	-7	Promoter mGene mQTLs
cg20055417	chr1	52927173	52927172	rs1242331:53392908:A:G	52927236	52927236	0	4.53817e-29	-0.980277	0.0699186	FALSE	-7	Promoter mGene mQTLs
cg03609269	chr1	52927352	52927351	rs1242331:53392908:A:G	52927236	52927236	0	2.30881e-26	-0.619781	0.0476647	FALSE	-7	Promoter mGene mQTLs
cg04310824	chr1	52927626	52927625	rs1242331:53392908:A:G	52927236	52927236	0	1.86125e-11	-0.225744	0.0310588	TRUE	-7	Promoter mGene mQTLs
cg03579872	chr1	52927802	52927801	rs1242331:53392908:A:G	52927236	52927236	0	4.10193e-24	-0.426677	0.0350835	FALSE	-7	Promoter mGene mQTLs
cg01802117	chr1	52927889	52927888	rs1242331:53392908:A:G	52927236	52927236	0	5.61153e-28	-1.20508	0.0885522	FALSE	-7	Promoter mGene mQTLs
cg02813845	chr1	52928081	52928080	rs1242331:53392908:A:G	52927236	52927236	0	2.85066e-28	-0.839526	0.0611927	FALSE	1438	Promoter mGene mQTLs
cg27428660	chr1	54053502	54053501	rs201851293:53601810:ACT:A	53136138	53136140	0	3.03806e-07	-0.195165	0.036392	TRUE	-21562	Distal non-mGene mQTLs
cg14898108	chr1	53143018	53143017	rs2404211:53607666:T:C	53141994	53141994	0	1.58479e-15	0.188818	0.0211895	FALSE	638	Promoter mGene mQTLs
cg24995061	chr1	54250198	54250197	rs622808:54715921:A:G	54250248	54250248	0	5.31749e-08	-0.21023	0.0366866	TRUE	163231	Distal mGene mQTLs
cg05461140	chr1	54298961	54298960	rs2183162:54762721:T:G	54297048	54297048	0	6.26043e-11	-0.363349	0.0515751	FALSE	116431	Distal mGene mQTLs
cg09935045	chr1	56645527	56645526	rs11206895:57138450:C:T	56672777	56672777	0	9.69705e-10	0.119525	0.01831	FALSE	-27455	Distal mGene mQTLs
cg20301308	chr1	65069060	65069059	rs486378:65530283:A:G	65064600	65064600	0	2.25939e-11	0.327777	0.045318	FALSE	-6092	Distal non-mGene mQTLs
cg21119717	chr1	65264418	65264417	rs11208616	65258168	65258168	0	1.62359e-09	-0.156305	0.0243153	FALSE	-9949	Distal mGene mQTLs
cg27037565	chr1	65264611	65264610	rs34750466:65741582:C:CT	65275899	65275899	0	6.0643e-08	-0.163556	0.0286778	TRUE	-27680	Distal mGene mQTLs
cg19057348	chr1	65264409	65264408	rs7544627:65745919:C:T	65280236	65280236	0	7.93447e-08	-0.144414	0.0255721	FALSE	-32017	Distal mGene mQTLs
cg05531421	chr1	65306656	65306655	rs10789179:65772315:G:A	65306632	65306632	0	1.91971e-18	0.374295	0.0373075	TRUE	-58413	Distal mGene mQTLs
cg23217983	chr1	66553143	66553142	rs72677052:66984572:G:A	66518889	66518889	0	3.23818e-09	0.128691	0.0204479	FALSE	14494	Distal mGene mQTLs
cg13052034	chr1	66533556	66533555	1:66999215:G:GATAAT	66533532	66533532	0	2.04052e-28	0.778323	0.0565064	FALSE	-149	Promoter mGene mQTLs
cg15533467	chr1	84691817	84691816	rs2911562	84660460	84660460	0	5.21167e-10	-0.181429	0.0272957	FALSE	30343	Distal mGene mQTLs
cg10574897	chr1	84691501	84691500	rs11164046:85172633:G:T	84706950	84706950	0	9.24924e-09	0.191793	0.0315145	FALSE	-16147	Distal mGene mQTLs
cg22475139	chr1	94092570	94092569	rs4147882:94558255:TA:T	94092699	94092700	0	1.83567e-10	0.189322	0.0276613	TRUE	28433	Distal mGene mQTLs
cg08916447	chr1	94117451	94117450	rs3838282:94583038:A:G	94117482	94117482	0	1.02405e-09	0.161903	0.0248418	TRUE	3650	Distal mGene mQTLs
cg01526259	chr1	109392290	109392289	rs10858087:109916890:T:A	109374268	109374268	0	5.67647e-09	-0.171369	0.0277163	FALSE	23683	Distal mGene mQTLs
cg22697853	chr1	148264934	148264933	rs7519981:147777876:C:G	148305768	148305768	0	2.19874e-09	0.237363	0.0372667	FALSE	12245	Distal non-mGene mQTLs
cg13067553	chr1	148310345	148310344	rs7519981:147777876:C:G	148305768	148305768	0	7.87559e-12	0.205874	0.0277282	FALSE	12245	Distal non-mGene mQTLs
cg23206461	chr1	148310009	148310008	rs553657:147783826:A:T	148311718	148311718	0	1.82566e-14	-0.283922	0.033428	FALSE	6295	Distal non-mGene mQTLs
cg13392957	chr1	148310172	148310171	rs553657:147783826:A:T	148311718	148311718	0	2.24807e-12	-0.234781	0.0306893	FALSE	6295	Distal non-mGene mQTLs
cg25862444	chr1	148264742	148264741	rs10752440:147785038:C:T	148312930	148312930	0	9.09531e-16	0.310761	0.03451	FALSE	5083	Distal non-mGene mQTLs
cg13502125	chr1	148354064	148354063	rs76197525:147793344:G:A	148321245	148321245	0	1.5335e-19	-0.439559	0.0420702	FALSE	-3232	Distal non-mGene mQTLs
cg12099459	chr1	148354775	148354774	rs76197525:147793344:G:A	148321245	148321245	0	7.67741e-14	-0.376708	0.0456883	FALSE	-3232	Distal non-mGene mQTLs
cg23403636	chr1	148309105	148309104	rs539114:147807110:A:T	148334986	148334986	0	7.63369e-20	-0.439732	0.0416316	TRUE	-432	Distal non-mGene mQTLs
cg10207181	chr1	148328966	148328965	rs539114:147807110:A:T	148334986	148334986	0	6.01263e-07	-0.0907097	0.0173952	FALSE	-432	Distal non-mGene mQTLs
cg03951833	chr1	148328979	148328978	rs539114:147807110:A:T	148334986	148334986	0	1.84805e-10	-0.306541	0.044796	TRUE	-432	Distal non-mGene mQTLs
cg17476910	chr1	148334049	148334048	rs539114:147807110:A:T	148334986	148334986	0	8.68243e-20	-0.446566	0.0423631	FALSE	-432	Distal non-mGene mQTLs
cg18140268	chr1	148309720	148309719	rs488014:147818267:C:G	148346139	148346139	0	6.16647e-13	-0.316681	0.0401871	FALSE	-28126	Distal non-mGene mQTLs
cg06804778	chr1	148318543	148318542	rs1855791:147820816:G:A	148348688	148348688	0	9.03677e-11	-0.191872	0.0275011	FALSE	-30675	Distal non-mGene mQTLs
cg03102494	chr1	148329597	148329596	rs1855791:147820816:G:A	148348688	148348688	0	3.89448e-11	-0.27906	0.0391236	TRUE	-30675	Distal non-mGene mQTLs
cg25200152	chr1	148318343	148318342	rs509493:147822005:A:G	148349877	148349877	0	5.46446e-11	-0.341722	0.0483325	FALSE	-31864	Distal non-mGene mQTLs
cg03242265	chr1	148310365	148310364	rs526708:147822212:T:C	148350084	148350084	0	1.03272e-12	-0.316602	0.0406483	FALSE	-32071	Distal non-mGene mQTLs
cg21919968	chr1	148351298	148351297	rs1582087:147822261:G:A	148350133	148350133	0	6.66127e-18	-0.210609	0.0214316	FALSE	-32120	Distal non-mGene mQTLs
cg22505006	chr1	155009354	155009353	rs6686021:154983539:C:T	155011063	155011063	0	8.47667e-08	-0.144692	0.0256842	FALSE	-8433	Distal mGene mQTLs
cg12639442	chr1	156084594	156084593	rs74965833:156054119:C:T	156084328	156084328	0	7.71618e-08	0.194187	0.0343504	TRUE	-1755	Promoter mGene mQTLs
cg06440960	chr1	155859136	155859135	rs11578696:156056968:A:G	156087177	156087177	0	2.40705e-07	0.151682	0.0280227	TRUE	-5179	Distal non-mGene mQTLs
cg15685922	chr1	156075418	156075417	rs11264435:156059276:G:A	156089485	156089485	0	1.07705e-09	-0.110779	0.0170228	FALSE	-7487	Distal mGene mQTLs
cg14087168	chr1	156480878	156480877	rs1171557:156451264:C:T	156481472	156481472	0	8.42645e-09	-0.090541	0.014832	FALSE	19356	Distal mGene mQTLs
cg09166556	chr1	156754486	156754485	1:156470497:G:C	156500705	156500705	0	3.9595e-07	-0.582474	0.109783	TRUE	123	Distal non-mGene mQTLs
ch.1.173201084F	chr1	174965325	174965324	rs61828157:174978038:G:A	175008902	175008902	0	2.8038e-16	0.342218	0.0371841	FALSE	-849492	Distal non-mGene mQTLs
cg08733291	chr1	178005015	178005014	rs12564334:177972616:T:C	178003481	178003481	0	3.94937e-22	0.286973	0.025128	TRUE	-19178	Distal non-mGene mQTLs
cg10559803	chr1	178724763	178724762	rs1999185:178674512:C:T	178705377	178705377	0	2.84024e-11	-0.201325	0.0279974	FALSE	19770	Distal mGene mQTLs
cg25384333	chr1	178724461	178724460	rs1018669	178718324	178718324	0	6.57859e-11	0.207231	0.0294535	FALSE	6823	Distal mGene mQTLs
cg16394775	chr1	178724480	178724479	rs1018669	178718324	178718324	0	3.87414e-11	0.18722	0.0262442	FALSE	6823	Distal mGene mQTLs
cg07405674	chr1	178725170	178725169	rs1018669	178718324	178718324	0	8.25442e-13	0.107317	0.0137084	FALSE	6823	Distal mGene mQTLs
cg07824564	chr1	179081777	179081776	rs75317895:178994764:A:G	179025629	179025629	0	2.39555e-11	0.6291	0.0871077	FALSE	175	Distal non-mGene mQTLs
cg27473416	chr1	180953781	180953780	rs141789904:180901510:T:TA	180932374	180932374	0	1.39212e-06	-0.248905	0.0494978	TRUE	-25723	Distal non-mGene mQTLs
cg22776392	chr1	180954434	180954433	rs76014269:180923595:G:A	180954459	180954459	0	1.36672e-09	0.505744	0.0782687	FALSE	428	Distal non-mGene mQTLs
cg06128826	chr1	180977631	180977630	rs1044595:180943529:C:T	180974393	180974393	0	2.60265e-07	0.115181	0.0213452	TRUE	48728	Distal mGene mQTLs
cg22213391	chr1	200891410	200891409	rs2279944:201012247:C:T	201043119	201043119	0	4.0333e-09	-0.194833	0.031171	FALSE	-19419	Distal non-mGene mQTLs
cg10799510	chr1	201266931	201266930	rs11801270:201234486:T:C	201265358	201265358	0	3.47082e-09	-0.189045	0.0301027	FALSE	18094	Distal non-mGene mQTLs
cg07302580	chr1	201267052	201267051	rs11801270:201234486:T:C	201265358	201265358	0	1.3291e-11	-0.209073	0.0285241	FALSE	18094	Distal non-mGene mQTLs
cg16819028	chr1	201282855	201282854	rs12117501:201236429:T:C	201267301	201267301	0	1.17071e-11	-0.320548	0.0435954	FALSE	16151	Distal mGene mQTLs
cg18153027	chr1	201269283	201269282	rs12117501:201236429:T:C	201267301	201267301	0	1.95904e-07	-0.242513	0.0444422	FALSE	16151	Distal non-mGene mQTLs
cg19764279	chr1	201270229	201270228	rs12129670:201237806:C:T	201268678	201268678	0	1.45969e-14	-0.683136	0.0800673	TRUE	14774	Distal non-mGene mQTLs
cg00578673	chr1	201226086	201226085	rs4915503:201240763:T:C	201271635	201271635	0	1.1757e-07	0.07456	0.0133983	FALSE	11817	Distal non-mGene mQTLs
cg01022117	chr1	201289153	201289152	rs2300293	201295774	201295774	0	1.36026e-13	-0.337406	0.041422	FALSE	-12322	Distal mGene mQTLs
cg08811228	chr1	202129963	202129962	rs6676433:202093628:A:G	202124500	202124500	0	6.08341e-10	-0.282158	0.0426396	TRUE	-1642	Distal non-mGene mQTLs
cg10734950	chr1	202809638	202809637	rs10699901:202778804:A:AAG	202809676	202809676	0	2.39534e-21	-0.262497	0.0235903	TRUE	-206	Promoter mGene mQTLs
cg21105875	chr1	202809742	202809741	rs10699901:202778804:A:AAG	202809676	202809676	0	1.49241e-07	-0.341683	0.06196	FALSE	-206	Promoter mGene mQTLs
cg20677516	chr1	202811930	202811929	rs2275895	202811402	202811402	0	7.04566e-17	0.203743	0.0215949	FALSE	-1932	Distal non-mGene mQTLs
cg08925398	chr1	202967884	202967883	rs35989591:202924527:AT:A	202955399	202955400	0	8.50607e-11	-0.274222	0.0392411	FALSE	11881	Distal mGene mQTLs
cg18275051	chr1	202967987	202967986	rs35989591:202924527:AT:A	202955399	202955400	0	8.35398e-11	-0.133745	0.0191297	FALSE	11881	Distal mGene mQTLs
cg03058725	chr1	202968485	202968484	rs4989513:202929586:T:C	202960458	202960458	0	4.5052e-08	-0.144873	0.0251312	TRUE	6822	Distal mGene mQTLs
cg07771034	chr1	202967423	202967422	rs35356717:202936527:G:T	202967399	202967399	0	3.40835e-08	0.141794	0.0243549	TRUE	-119	Promoter mGene mQTLs
cg00358936	chr1	204196476	204196475	rs6659692:204253206:G:A	204284078	204284078	0	7.83394e-14	-0.154305	0.0187225	FALSE	-7073	Distal non-mGene mQTLs
cg11871090	chr1	204292943	204292942	rs5780225:204262031:CTGTTAG:C	204292903	204292909	0	6.99419e-21	0.290849	0.0265548	TRUE	84762	Distal mGene mQTLs
cg09850925	chr1	204305163	204305162	rs4078324:204264359:C:T	204295231	204295231	0	1.71035e-17	0.221005	0.0228531	FALSE	82434	Distal mGene mQTLs
cg26787863	chr1	204317340	204317339	rs35245269:204280447:T:C	204311319	204311319	0	8.38085e-08	-0.134259	0.0238223	TRUE	66346	Distal mGene mQTLs
cg20034980	chr1	204377807	204377806	rs10494854	204354746	204354746	0	1.18692e-06	-0.0794165	0.0156817	FALSE	-77741	Distal non-mGene mQTLs
cg00142815	chr1	205269131	205269130	rs61823972:205201325:A:C	205232197	205232197	0	1.04554e-07	0.12072	0.0215974	FALSE	-4021	Distal mGene mQTLs
cg21728107	chr1	205247858	205247857	rs370647985:205216972:G:A	205247844	205247844	0	9.06052e-07	0.385548	0.0752389	TRUE	-19668	Distal mGene mQTLs
cg10768996	chr1	205266875	205266874	rs1172113:205226288:T:C	205257160	205257160	0	1.2339e-12	0.176734	0.0227832	FALSE	-28984	Distal mGene mQTLs
cg25393376	chr1	205275267	205275266	rs1668871	205268009	205268009	0	1.16486e-07	0.139732	0.0251006	FALSE	-56443	Distal non-mGene mQTLs
cg11170025	chr1	205275317	205275316	rs1668871	205268009	205268009	0	7.10465e-18	0.223612	0.0227794	FALSE	-56443	Distal non-mGene mQTLs
cg02716605	chr1	205269702	205269701	rs1668868:205240141:G:T	205271013	205271013	0	5.79378e-07	0.113217	0.0216775	TRUE	-42837	Distal mGene mQTLs
cg23576477	chr1	206714366	206714365	rs4077462:206910120:G:A	206736775	206736775	0	3.1163e-08	0.381738	0.0653625	TRUE	-51831	Distal mGene mQTLs
cg02669047	chr1	206757889	206757888	rs10494878:206915809:A:G	206742464	206742464	0	6.661e-07	-0.177294	0.0341464	FALSE	-106928	Distal non-mGene mQTLs
cg00085493	chr1	207866859	207866858	rs926628:208040165:T:C	207866820	207866820	0	3.39209e-10	0.245431	0.0364767	FALSE	12276	Distal non-mGene mQTLs
cg06436493	chr1	211492097	211492096	rs12407592:211660016:T:C	211486674	211486674	0	5.95001e-07	0.0714687	0.0136994	FALSE	6243	Distal mGene mQTLs
cg10512769	chr1	211502015	211502014	rs367700286:211662675:TTTC:T	211489333	211489336	0	9.483e-36	-1.2835	0.0773855	FALSE	2922	Distal non-mGene mQTLs
cg27398908	chr1	211488722	211488721	rs367700286:211662675:TTTC:T	211489333	211489336	0	6.18665e-10	-0.19482	0.0294554	TRUE	3584	Distal mGene mQTLs
cg14264194	chr1	211479208	211479207	rs1122745:211663261:C:T	211489919	211489919	0	6.97198e-09	0.217212	0.0353639	FALSE	2998	Distal mGene mQTLs
cg00658007	chr1	211492788	211492787	rs1122745:211663261:C:T	211489919	211489919	0	1.49874e-20	-0.439367	0.0405751	FALSE	2998	Distal mGene mQTLs
cg06753273	chr1	211493088	211493087	rs1122745:211663261:C:T	211489919	211489919	0	4.66907e-19	-0.473063	0.0460829	FALSE	2998	Distal mGene mQTLs
cg04923746	chr1	211492963	211492962	rs10863899	211492876	211492876	0	8.1715e-20	-0.30053	0.0284827	FALSE	41	Promoter mGene mQTLs
cg24484971	chr1	211493111	211493110	rs10863899	211492876	211492876	0	1.30352e-14	-0.26223	0.030665	FALSE	41	Promoter mGene mQTLs
cg14032261	chr1	211735964	211735963	rs12123627:211899271:A:T	211725929	211725929	0	3.75077e-07	-0.152875	0.0287501	FALSE	-527	Distal non-mGene mQTLs
cg03979381	chr1	211815087	211815086	rs61044318:211928892:GA:G	211755550	211755551	0	9.80398e-18	-0.427694	0.0438076	TRUE	75222	Distal mGene mQTLs
cg04222084	chr1	221742309	221742308	rs4601596:221914458:C:T	221741116	221741116	0	4.08107e-08	-0.44986	0.0777631	FALSE	1060	Promoter mGene mQTLs
cg04193160	chr1	228212719	228212718	rs55873533:228334436:G:A	228146735	228146735	0	2.88242e-08	0.128299	0.0219079	FALSE	-6773	Distal non-mGene mQTLs
cg00550925	chr1	230068227	230068226	rs6684422:230210365:A:T	230074618	230074618	0	3.22111e-08	0.126691	0.0217175	TRUE	-16628	Distal mGene mQTLs
cg16698674	chr1	230136612	230136611	1:230246459:C:T	230110712	230110712	0	5.69632e-12	-0.795609	0.106319	TRUE	-52722	Distal mGene mQTLs
cg16246661	chr1	230136865	230136864	1:230246459:C:T	230110712	230110712	0	8.50465e-19	-0.566248	0.0556955	TRUE	-52722	Distal mGene mQTLs
cg23735745	chr1	230112375	230112374	rs754665:230250297:T:C	230114550	230114550	0	7.67135e-22	-0.274399	0.0242562	FALSE	-56560	Distal mGene mQTLs
cg02931783	chr1	230112976	230112975	rs3033644:230258361:CTG:C	230122614	230122616	0	2.02074e-14	-0.220725	0.0260409	TRUE	-64624	Distal mGene mQTLs
cg16698674	chr1	230136612	230136611	rs1973943	230136316	230136316	1	1.11763e-07	0.572535	0.102687	FALSE	-78326	Distal mGene mQTLs
cg26525772	chr1	230136560	230136559	rs6659658:230272380:G:A	230136633	230136633	0	3.14504e-10	0.42939	0.0636818	FALSE	-78643	Distal mGene mQTLs
cg15817769	chr1	230136796	230136795	rs11807834:230272624:G:A	230136877	230136877	0	4.21109e-10	-0.229858	0.034372	FALSE	-78887	Distal mGene mQTLs
cg11795921	chr1	230136910	230136909	rs11807834:230272624:G:A	230136877	230136877	0	1.82638e-18	-0.612129	0.0609634	FALSE	-78887	Distal mGene mQTLs
cg22153407	chr1	230154343	230154342	rs11122401:230281068:G:A	230145321	230145321	0	1.66089e-16	-0.19288	0.0207593	FALSE	-87331	Distal mGene mQTLs
cg05784532	chr1	230148452	230148451	rs7551742:230290118:A:G	230154371	230154371	0	7.46122e-09	0.189159	0.0308645	FALSE	-96381	Distal mGene mQTLs
cg18187658	chr1	230158945	230158944	rs113806412:230294662:GTGTC:G	230158915	230158919	0	3.9967e-07	0.325436	0.0613609	TRUE	-100925	Distal mGene mQTLs
cg09880891	chr1	230159548	230159547	rs12065546:230295245:C:T	230159498	230159498	0	5.57103e-16	0.35135	0.038662	FALSE	-101508	Distal mGene mQTLs
cg22715072	chr1	230177899	230177898	rs627702:230324119:G:A	230188373	230188373	0	1.41209e-23	0.379067	0.0316914	FALSE	-130383	Distal mGene mQTLs
cg26538223	chr1	230773160	230773159	rs12757624:230914121:A:G	230778375	230778375	0	8.95044e-32	0.302391	0.0200954	FALSE	-30991	Distal mGene mQTLs
cg12189363	chr1	231393338	231393337	rs480902	231395881	231395881	0	3.37072e-25	0.450461	0.0358439	FALSE	29163	Distal mGene mQTLs
cg20853591	chr1	231407733	231407732	rs2808616:231554993:C:G	231419247	231419247	0	2.65857e-09	-0.152449	0.024075	FALSE	5797	Distal mGene mQTLs
cg23162821	chr1	231528427	231528426	rs1765782	231575743	231575743	0	5.90906e-18	-0.284343	0.0288764	FALSE	-47090	Distal mGene mQTLs
cg19193962	chr1	231528440	231528439	rs1765782	231575743	231575743	0	1.10707e-20	-0.761664	0.0700193	FALSE	-47090	Distal non-mGene mQTLs
cg04892437	chr1	231602156	231602155	rs9651124:231736611:C:T	231600865	231600865	0	6.56606e-10	-0.301769	0.045704	FALSE	-72212	Distal mGene mQTLs
cg09305898	chr1	231626627	231626626	rs823158:231782650:C:T	231646904	231646904	0	1.08849e-25	-0.332635	0.0260872	FALSE	-20089	Distal mGene mQTLs
cg24499839	chr1	231626493	231626492	rs1094654:231796216:A:T	231660470	231660470	0	1.29122e-10	-0.115858	0.016766	FALSE	-131817	Distal mGene mQTLs
cg03987748	chr1	231626614	231626613	exm-rs12042938	231681096	231681096	0	3.69838e-22	-0.283157	0.0247707	FALSE	-54281	Distal mGene mQTLs
cg08838517	chr1	231626623	231626622	exm-rs12042938	231681096	231681096	0	6.7916e-20	-0.430814	0.0407136	FALSE	-54281	Distal mGene mQTLs
cg02530879	chr1	231809224	231809223	rs12735888:231944888:T:C	231809142	231809142	0	1.32317e-13	-0.208378	0.0255666	FALSE	-182327	Distal mGene mQTLs
cg10388113	chr1	231867075	231867074	rs76945478:231974202:T:G	231838456	231838456	0	8.1006e-14	0.56731	0.0688829	TRUE	-211641	Distal mGene mQTLs
cg09186051	chr1	231846161	231846160	rs4658953:231977773:T:C	231842027	231842027	0	2.84229e-08	0.198979	0.0339605	FALSE	-215212	Distal mGene mQTLs
cg12077889	chr1	232568168	232568167	rs368352108:232699880:GT:G	232564134	232564135	0	8.83518e-09	0.131354	0.0215512	TRUE	-2576	Distal non-mGene mQTLs
ch.1.230766435F	chr1	232564067	232564066	rs1285672:232715237:A:T	232579491	232579491	0	4.53857e-08	0.104442	0.0181224	FALSE	-17933	Distal non-mGene mQTLs
cg05864683	chr1	232599636	232599635	rs10752794:232735448:C:G	232599702	232599702	0	1.02836e-08	0.166756	0.0274964	FALSE	-38144	Distal non-mGene mQTLs
cg17444090	chr1	232599705	232599704	rs10752794:232735448:C:G	232599702	232599702	0	1.44384e-16	0.252233	0.027079	FALSE	-38144	Distal non-mGene mQTLs
cg24169009	chr1	231897577	231897576	rs4649395:232763275:G:T	232627529	232627529	0	2.42581e-08	0.927337	0.157404	TRUE	-65971	Distal non-mGene mQTLs
cg24050135	chr1	234523802	234523801	rs509235:234660054:A:G	234524308	234524308	0	1.6215e-07	-0.0924836	0.0168244	TRUE	7471	Distal non-mGene mQTLs
cg13023668	chr1	234532621	234532620	rs271764:234673273:A:G	234537527	234537527	0	2.17758e-08	0.113463	0.0191875	FALSE	-5748	Distal mGene mQTLs
cg05990710	chr1	234544709	234544708	rs271761:234683129:C:T	234547383	234547383	0	1.09087e-17	0.223905	0.0229757	FALSE	-15604	Distal non-mGene mQTLs
cg10714509	chr1	234544766	234544765	rs271761:234683129:C:T	234547383	234547383	0	2.48851e-18	0.280074	0.0280358	FALSE	-15604	Distal non-mGene mQTLs
cg22176787	chr1	234600508	234600507	rs11581076:234725135:C:T	234589389	234589389	0	7.77372e-11	0.258112	0.0368474	FALSE	3886	Distal non-mGene mQTLs
cg02985240	chr1	235304834	235304833	rs144647926:235467607:G:A	235304292	235304292	0	1.3836e-21	0.678961	0.0605316	FALSE	23927	Distal mGene mQTLs
cg19456318	chr1	235831531	235831530	rs3820555	235831567	235831567	0	6.27193e-14	-0.329377	0.0397784	TRUE	52073	Distal mGene mQTLs
cg17288694	chr10	1056776	1056775	rs11250244:1102710:C:A	1056770	1056770	0	2.75104e-14	0.245186	0.0291094	FALSE	-7232	Distal mGene mQTLs
cg14330737	chr10	3081289	3081288	rs10581924:3105257:CCACT:C	3063065	3063069	0	1.39978e-09	0.37363	0.0578642	TRUE	3268	Distal mGene mQTLs
cg27319114	chr10	3094749	3094748	rs10903953:3114654:T:C	3072462	3072462	0	1.83008e-07	0.173048	0.0316282	TRUE	-6129	Distal mGene mQTLs
cg22620285	chr10	3081296	3081295	rs12245370:3119150:A:G	3076958	3076958	0	4.13639e-10	0.304184	0.0454632	FALSE	-10625	Distal mGene mQTLs
cg14006650	chr10	3105283	3105282	rs12776036:3148258:T:G	3106066	3106066	0	3.31695e-14	0.182648	0.0217682	FALSE	-39733	Distal mGene mQTLs
cg05561696	chr10	3107605	3107604	rs7342001:3148598:A:G	3106406	3106406	0	1.48885e-07	-0.284797	0.0516398	TRUE	-40073	Distal mGene mQTLs
cg12265908	chr10	3125635	3125634	rs58374102:3166746:C:T	3124554	3124554	0	1.59492e-10	0.205779	0.0299503	FALSE	-58221	Distal mGene mQTLs
cg20149431	chr10	3126494	3126493	rs78262828:3166775:C:T	3124583	3124583	0	7.53422e-10	0.243959	0.0370965	FALSE	-58250	Distal mGene mQTLs
cg18166150	chr10	3126846	3126845	rs6602031:3167983:A:G	3125791	3125791	0	2.436e-13	-0.208796	0.0259579	FALSE	-59458	Distal mGene mQTLs
cg24984350	chr10	3128109	3128108	rs7080240	3127611	3127611	0	2.28587e-19	-0.262393	0.025272	FALSE	-61278	Distal mGene mQTLs
cg22667358	chr10	3128955	3128954	rs57993510:3170288:A:AGGAC	3128096	3128096	0	3.20584e-11	-0.149587	0.020867	FALSE	-61763	Distal mGene mQTLs
cg18474443	chr10	3130288	3130287	rs4390256:3172299:T:C	3130107	3130107	0	1.23888e-12	-0.437098	0.0563526	FALSE	-63774	Distal mGene mQTLs
cg25978025	chr10	3126162	3126161	10:3176627:A:AC	3134435	3134435	0	1.3882e-09	0.268151	0.0415183	TRUE	-68102	Distal mGene mQTLs
cg13562929	chr10	7252310	7252309	rs12412153:7301132:G:A	7259170	7259170	0	1.35258e-13	-0.196698	0.0241449	FALSE	152316	Distal mGene mQTLs
cg05103064	chr10	7269539	7269538	rs1977427	7267773	7267773	0	4.25326e-07	0.129397	0.0244601	FALSE	143713	Distal mGene mQTLs
cg06352464	chr10	11046243	11046242	rs1291799	11082536	11082536	0	4.26054e-09	-0.153602	0.024617	FALSE	-284139	Distal non-mGene mQTLs
cg14629910	chr10	11149742	11149741	rs1624142	11134687	11134687	0	5.49336e-09	0.309761	0.0500465	FALSE	-336290	Distal mGene mQTLs
cg10863857	chr10	11183305	11183304	rs7095683:11200637:A:G	11158674	11158674	0	3.70894e-08	0.253332	0.043643	FALSE	-360277	Distal mGene mQTLs
cg03864262	chr10	11276813	11276812	rs3814633:11318813:T:C	11276850	11276850	0	8.70272e-08	0.157369	0.0279618	TRUE	-478453	Distal mGene mQTLs
cg20072505	chr10	12414491	12414490	rs11374541:12472882:T:TG	12430883	12430883	0	3.73298e-07	-0.172695	0.0324711	TRUE	-81401	Distal mGene mQTLs
cg16974075	chr10	13051280	13051279	rs553638	13051111	13051111	0	2.39415e-14	0.289678	0.0342941	FALSE	7565	Distal non-mGene mQTLs
cg22870427	chr10	12062926	12062925	rs1133847:13103707:T:C	13061707	13061707	0	2.51759e-08	0.140677	0.0239089	TRUE	-3031	Distal non-mGene mQTLs
cg14458563	chr10	13074698	13074697	rs4750308:13116699:C:A	13074699	13074699	0	7.29361e-22	-0.407734	0.0360165	FALSE	24953	Distal mGene mQTLs
cg06116488	chr10	13100335	13100334	rs7911161:13147362:C:A	13105362	13105362	0	9.11296e-11	0.179832	0.0257813	TRUE	-5913	Distal mGene mQTLs
cg02635932	chr10	18260850	18260849	rs73601575:18570293:T:C	18281364	18281364	0	2.26917e-08	0.157305	0.0266393	FALSE	-140687	Distal mGene mQTLs
cg07372450	chr10	18390501	18390500	rs10828424:18579737:A:G	18290808	18290808	0	1.89908e-07	-0.133719	0.0244753	FALSE	-150131	Distal mGene mQTLs
cg14024017	chr10	19929597	19929596	rs16919374:20113015:C:T	19824086	19824086	0	3.48353e-16	0.234731	0.0256065	FALSE	-7847	Distal mGene mQTLs
cg12723985	chr10	19966980	19966979	rs16919374:20113015:C:T	19824086	19824086	0	5.31239e-15	0.216541	0.0248751	FALSE	-7847	Distal mGene mQTLs
cg03898108	chr10	19826842	19826841	rs7908024:20113614:A:T	19824685	19824685	0	6.10107e-14	0.193844	0.0233967	FALSE	-8446	Distal mGene mQTLs
cg15657225	chr10	19816251	19816250	rs379242	19832227	19832227	0	2.42697e-16	0.101827	0.0110351	FALSE	-15988	Distal mGene mQTLs
cg07534516	chr10	19815196	19815195	rs2478143	19832948	19832948	0	1.0096e-26	-0.322609	0.0245564	FALSE	-16709	Distal mGene mQTLs
cg27401333	chr10	19922630	19922629	rs2481935:20123335:A:G	19834406	19834406	0	4.62746e-18	-0.299429	0.030284	FALSE	-18167	Distal mGene mQTLs
cg03631457	chr10	19941809	19941808	rs2481935:20123335:A:G	19834406	19834406	0	3.69013e-11	-0.18498	0.0258977	FALSE	-18167	Distal mGene mQTLs
cg26784012	chr10	31927463	31927462	rs2799017:32203460:A:G	31914532	31914532	0	1.898e-24	0.546814	0.0445042	FALSE	14344	Distal mGene mQTLs
cg22706007	chr10	31927432	31927431	rs2859755:32205586:G:C	31916658	31916658	0	1.15582e-09	0.232121	0.0357438	FALSE	12218	Distal mGene mQTLs
cg06004637	chr10	31827514	31827513	rs2808051:32205630:T:C	31916702	31916702	0	3.25981e-08	0.159031	0.0272728	FALSE	12174	Distal mGene mQTLs
cg18675610	chr10	31927384	31927383	rs144466157:32216157:A:AATTTTAAAACAAAG	31927229	31927229	0	7.09967e-23	0.58373	0.0498951	FALSE	1647	Promoter mGene mQTLs
cg01217608	chr10	35267484	35267483	rs71033392:35624849:CA:C	35335921	35335922	0	2.2266e-07	0.126258	0.0232541	TRUE	-88896	Distal mGene mQTLs
cg20832054	chr10	35470706	35470705	rs11599669:35701776:G:A	35412848	35412848	0	2.6705e-19	0.37619	0.0363215	TRUE	-165823	Distal mGene mQTLs
cg04781305	chr10	35335502	35335501	rs3003981	35429284	35429284	0	2.47856e-27	-0.352532	0.0263747	FALSE	-182259	Distal mGene mQTLs
cg12291519	chr10	43455376	43455375	rs200546413:43886739:T:TC	43391291	43391291	0	6.80349e-14	0.427315	0.0516943	FALSE	17875	Distal non-mGene mQTLs
cg05101083	chr10	43409493	43409492	rs7092125:43887423:G:A	43391975	43391975	0	1.23689e-13	-0.174507	0.0213801	FALSE	17191	Distal mGene mQTLs
cg17569303	chr10	50551192	50551191	rs4935728:52278185:T:A	50518425	50518425	1	1.05533e-09	-0.826683	0.126956	FALSE	106738	Distal mGene mQTLs
cg00936935	chr10	50512140	50512139	rs10826171:52309094:A:G	50549334	50549334	0	6.52769e-12	-0.24879	0.0333559	FALSE	75829	Distal mGene mQTLs
cg24037270	chr10	50307108	50307107	rs10508930:52338100:A:G	50578340	50578340	0	4.04621e-14	-0.426365	0.0510235	FALSE	46823	Distal mGene mQTLs
cg00453368	chr10	50361419	50361418	rs10508930:52338100:A:G	50578340	50578340	0	4.20901e-11	-0.279698	0.0392918	FALSE	46823	Distal mGene mQTLs
cg00168459	chr10	50374956	50374955	rs10508930:52338100:A:G	50578340	50578340	0	1.00792e-11	-0.304069	0.0412019	FALSE	46823	Distal mGene mQTLs
cg10188795	chr10	50398485	50398484	rs10508930:52338100:A:G	50578340	50578340	0	1.45837e-10	-0.339756	0.0493295	FALSE	46823	Distal mGene mQTLs
cg08363235	chr10	50417072	50417071	rs10508930:52338100:A:G	50578340	50578340	0	4.25806e-16	-0.49087	0.0537468	FALSE	46823	Distal mGene mQTLs
cg08557120	chr10	50470107	50470106	rs10508930:52338100:A:G	50578340	50578340	0	1.67978e-07	-0.211672	0.0385593	TRUE	46823	Distal mGene mQTLs
cg22388374	chr10	50496818	50496817	rs10508930:52338100:A:G	50578340	50578340	0	5.43273e-19	-0.35993	0.0351474	TRUE	46823	Distal mGene mQTLs
cg14611218	chr10	50503756	50503755	rs10508930:52338100:A:G	50578340	50578340	0	1.30401e-33	-0.970088	0.0615787	FALSE	46823	Distal mGene mQTLs
cg03585110	chr10	50504013	50504012	rs10508930:52338100:A:G	50578340	50578340	0	4.29397e-27	-0.94771	0.0713813	FALSE	46823	Distal mGene mQTLs
cg15678767	chr10	50527564	50527563	rs10508930:52338100:A:G	50578340	50578340	0	6.38668e-17	-0.475758	0.0503384	FALSE	46823	Distal mGene mQTLs
cg07494431	chr10	50527581	50527580	rs10508930:52338100:A:G	50578340	50578340	0	1.77225e-24	-0.698406	0.0567906	FALSE	46823	Distal mGene mQTLs
cg13784163	chr10	50545717	50545716	rs10508930:52338100:A:G	50578340	50578340	0	3.64729e-20	-0.522077	0.0488688	FALSE	46823	Distal mGene mQTLs
cg17569303	chr10	50551192	50551191	rs10508930:52338100:A:G	50578340	50578340	0	5.66355e-18	-1.50533	0.152764	FALSE	46823	Distal mGene mQTLs
cg11764846	chr10	50553743	50553742	rs10508930:52338100:A:G	50578340	50578340	0	9.73683e-19	-0.581655	0.0573366	FALSE	46823	Distal mGene mQTLs
cg05102856	chr10	50565848	50565847	rs10508930:52338100:A:G	50578340	50578340	0	4.12796e-09	-0.251945	0.0403377	TRUE	46823	Distal mGene mQTLs
cg13382516	chr10	50576594	50576593	rs10508930:52338100:A:G	50578340	50578340	0	5.592e-18	-0.40139	0.0407253	FALSE	46823	Distal mGene mQTLs
cg20014988	chr10	50603373	50603372	rs10508930:52338100:A:G	50578340	50578340	0	2.87089e-13	-0.289239	0.036088	FALSE	46823	Distal mGene mQTLs
cg17673495	chr10	50619287	50619286	rs10508930:52338100:A:G	50578340	50578340	0	1.82953e-10	-0.196745	0.0287432	FALSE	46823	Distal mGene mQTLs
cg14316118	chr10	59908427	59908426	rs11819256:61663106:T:C	59903348	59903348	0	1.18073e-27	0.476531	0.035332	FALSE	3308	Distal mGene mQTLs
cg07064056	chr10	60353968	60353967	rs10821738:62109449:G:A	60349691	60349691	0	3.63901e-15	-0.29577	0.0337265	FALSE	383799	Distal mGene mQTLs
cg00294550	chr10	60385029	60385028	rs7100330:62170627:C:A	60410869	60410869	0	2.23436e-08	-0.216534	0.03665	FALSE	322621	Distal mGene mQTLs
cg12655303	chr10	60570942	60570941	rs72807927:62243039:A:G	60483281	60483281	0	2.06272e-14	-1.02211	0.120637	TRUE	250209	Distal mGene mQTLs
cg09641919	chr10	68331859	68331858	rs2295972:70092052:G:C	68332295	68332295	0	8.85149e-10	0.240325	0.0367166	FALSE	-1121	Promoter mGene mQTLs
cg15420141	chr10	68331861	68331860	rs2295972:70092052:G:C	68332295	68332295	0	5.92154e-09	0.219265	0.0355108	FALSE	-1121	Promoter mGene mQTLs
cg11178592	chr10	69383549	69383548	rs4745984:71143488:C:A	69383732	69383732	0	2.76914e-13	0.234596	0.0292472	FALSE	-113748	Distal mGene mQTLs
cg27334542	chr10	71845765	71845764	rs3061818:73598192:C:CAT	71838435	71838435	0	1.52754e-23	0.446141	0.0373388	TRUE	12940	Distal mGene mQTLs
cg15854154	chr10	71833202	71833201	rs201214539:73616129:ATTTATTTTTATTTTAT:A	71856372	71856388	0	5.5207e-07	-0.305062	0.0582923	TRUE	-4997	Distal mGene mQTLs
cg17614262	chr10	71878632	71878631	rs77202663:73620764:T:A	71861007	71861007	0	1.30069e-10	0.408847	0.0591768	TRUE	-16213	Distal non-mGene mQTLs
cg09726879	chr10	71860452	71860451	rs74980167:73621010:G:A	71861253	71861253	0	5.03111e-17	-0.608813	0.0641463	FALSE	-16459	Distal non-mGene mQTLs
cg08342763	chr10	71848302	71848301	rs74980167:73621010:G:A	71861253	71861253	0	3.59101e-07	-0.513344	0.0963701	FALSE	-9878	Distal mGene mQTLs
cg25902925	chr10	72800094	72800093	rs9416015:74090617:G:T	72330859	72330859	0	7.00331e-09	-0.173351	0.0282272	TRUE	24371	Distal non-mGene mQTLs
cg05021029	chr10	75188199	75188198	rs7089501:76898688:T:G	75138930	75138930	0	8.22576e-15	-0.260992	0.0302411	FALSE	-39344	Distal non-mGene mQTLs
cg15522953	chr10	79083092	79083091	rs4980025:80840781:C:G	79081024	79081024	0	1.012e-10	-0.299276	0.0430256	FALSE	-11989	Distal mGene mQTLs
cg08058898	chr10	79112510	79112509	rs1765880:80873242:C:T	79113485	79113485	0	8.21866e-08	0.147669	0.0261827	FALSE	-44450	Distal mGene mQTLs
cg23346408	chr10	79242201	79242200	rs180964234:81016281:G:A	79256524	79256524	0	2.48327e-07	-0.308207	0.0570102	TRUE	-187489	Distal mGene mQTLs
cg03347973	chr10	79274749	79274748	rs1749855:81040209:T:G	79280452	79280452	0	3.96593e-07	-0.0927966	0.0174913	FALSE	-211417	Distal mGene mQTLs
cg24540756	chr10	84193836	84193835	rs7916271:85954220:C:T	84194464	84194464	0	1.51465e-07	0.151868	0.027555	TRUE	171	Promoter mGene mQTLs
cg22638834	chr10	84194487	84194486	rs7916271:85954220:C:T	84194464	84194464	0	5.05765e-10	0.160047	0.0240582	FALSE	171	Promoter mGene mQTLs
cg05375443	chr10	84237671	84237670	rs10887259:85997250:G:A	84237494	84237494	0	2.0235e-11	-0.181033	0.0249597	FALSE	3967	Distal mGene mQTLs
cg09035552	chr10	84241486	84241485	rs4933989:85999444:T:C	84239688	84239688	0	1.48477e-16	0.353757	0.0379974	FALSE	1773	Promoter mGene mQTLs
cg15780078	chr10	84244640	84244639	rs10736319:86004238:T:C	84244482	84244482	0	1.59612e-07	-0.111927	0.0203492	TRUE	571	Promoter mGene mQTLs
cg06705986	chr10	84245133	84245132	rs2279227:86004873:T:C	84245117	84245117	1	8.77284e-08	-0.597008	0.10611	FALSE	-64	Promoter mGene mQTLs
cg13133883	chr10	84244905	84244904	rs6585849:86006013:A:G	84246257	84246257	0	2.04616e-09	-0.155324	0.0243328	TRUE	-1204	Promoter mGene mQTLs
cg00415971	chr10	84245006	84245005	rs6585849:86006013:A:G	84246257	84246257	0	4.09597e-08	-0.153441	0.0265274	TRUE	-1204	Promoter mGene mQTLs
cg19051661	chr10	86829029	86829028	rs10646062:88596063:C:CCTTTA	86836306	86836306	0	1.64573e-27	-0.742941	0.0553068	TRUE	-79656	Distal mGene mQTLs
cg27642528	chr10	87054895	87054894	rs10887688:88835414:C:T	87075657	87075657	0	2.19749e-19	0.271082	0.0260926	FALSE	19209	Distal mGene mQTLs
cg07280357	chr10	87067808	87067807	rs5786757:88836152:TA:T	87076395	87076396	0	7.82396e-12	-0.219552	0.0295657	TRUE	18471	Distal mGene mQTLs
cg03303640	chr10	93080894	93080893	rs66527842:94749455:C:A	92989698	92989698	0	5.85847e-09	0.141222	0.0228637	FALSE	-154985	Distal non-mGene mQTLs
cg16577651	chr10	93060480	93060479	rs68040629:94831523:C:G	93071766	93071766	0	2.59775e-07	0.0851282	0.0157747	FALSE	-10958	Distal mGene mQTLs
cg06040071	chr10	97533410	97533409	rs12779451:99293327:G:A	97533570	97533570	0	1.23272e-14	0.17487	0.0204263	FALSE	-34702	Distal mGene mQTLs
cg27630316	chr10	97571858	97571857	rs10882957:99299542:T:A	97539785	97539785	0	1.75293e-11	-0.225269	0.0309468	FALSE	-40917	Distal non-mGene mQTLs
cg22889914	chr10	97571576	97571575	rs12783481:99305631:T:C	97545874	97545874	0	1.858e-19	0.362423	0.0347924	FALSE	-47006	Distal non-mGene mQTLs
cg26194641	chr10	97611585	97611584	rs12261752:99371344:C:A	97611587	97611587	0	4.16995e-15	0.228177	0.026088	TRUE	-27264	Distal non-mGene mQTLs
cg12215133	chr10	96634315	96634314	rs77400570:99385097:CT:C	97625340	97625341	0	6.72166e-07	0.119185	0.0229636	TRUE	-41017	Distal non-mGene mQTLs
cg13196796	chr10	97633461	97633460	rs11189298:99385822:C:A	97626065	97626065	0	1.24236e-15	0.249931	0.0279185	FALSE	7435	Distal mGene mQTLs
cg17001106	chr10	97640487	97640486	rs11189298:99385822:C:A	97626065	97626065	0	1.60513e-32	0.343685	0.0224137	TRUE	14621	Distal mGene mQTLs
cg15711987	chr10	97634130	97634129	rs5787251:99407672:C:CT	97647915	97647915	0	5.69008e-08	0.126877	0.0221951	TRUE	-14415	Distal mGene mQTLs
cg27568117	chr10	99906277	99906276	rs7898374:101666475:T:C	99906718	99906718	0	3.16309e-09	0.168764	0.0267955	FALSE	103201	Distal mGene mQTLs
cg02987555	chr10	99997296	99997295	rs34835799:101728445:CA:C	99968688	99968689	0	1.53172e-11	-0.192222	0.0263179	TRUE	41231	Distal mGene mQTLs
cg04366815	chr10	99930912	99930911	rs11421662:101763834:C:CA	100004077	100004077	0	6.36696e-08	-0.101155	0.0177679	TRUE	5842	Distal non-mGene mQTLs
cg19212550	chr10	100008152	100008151	rs7078766	100005136	100005136	0	4.52779e-09	-0.279511	0.0448822	FALSE	4783	Distal mGene mQTLs
cg25246745	chr10	101031272	101031271	rs151309793:103086967:G:T	101327210	101327210	0	4.756e-13	1.02277	0.129039	TRUE	-19681	Distal non-mGene mQTLs
cg11139010	chr10	101603259	101603258	rs10883626:103126837:A:T	101367080	101367080	0	1.39444e-18	-0.458092	0.0454212	TRUE	-2045	Distal non-mGene mQTLs
cg15320455	chr10	102120373	102120372	rs61874768:103880118:G:T	102120361	102120361	0	6.89178e-13	0.234751	0.0298647	FALSE	92	Promoter mGene mQTLs
cg02205181	chr10	102395055	102395054	10:103886791:T:A	102127034	102127034	0	7.5969e-09	0.259933	0.0424373	TRUE	-6581	Distal non-mGene mQTLs
cg04554652	chr10	102121223	102121222	rs12781848:103890751:C:T	102130994	102130994	0	6.93036e-07	0.191357	0.0369169	TRUE	-10541	Distal mGene mQTLs
cg09322489	chr10	102743393	102743392	rs11191355:104392497:T:C	102632740	102632740	0	6.14104e-07	-0.230437	0.0442297	FALSE	-128753	Distal non-mGene mQTLs
cg10872209	chr10	102715552	102715551	rs10786705	102717948	102717948	0	1.36865e-17	-0.298952	0.0307955	FALSE	-3410	Distal mGene mQTLs
cg18151487	chr10	102715584	102715583	rs10786705	102717948	102717948	0	2.47825e-23	-0.248604	0.020944	FALSE	-3410	Distal mGene mQTLs
cg23462236	chr10	102649171	102649170	rs11191379:104482330:C:T	102722573	102722573	0	3.34084e-11	-0.225843	0.0315378	FALSE	-8166	Distal non-mGene mQTLs
cg08758237	chr10	103561960	103561959	rs142254497:105311828:G:GTGA	103552071	103552071	0	3.94212e-22	-0.373954	0.0327433	TRUE	-58092	Distal mGene mQTLs
cg03962527	chr10	110007122	110007121	rs17126936:111757126:C:T	109997368	109997368	0	1.7778e-08	0.342355	0.0574952	FALSE	-1000	Promoter mGene mQTLs
cg05697697	chr10	109923588	109923587	rs61881589:111763910:T:C	110004152	110004152	0	1.40975e-13	0.437496	0.0537509	TRUE	-7784	Distal non-mGene mQTLs
cg01525935	chr10	110005356	110005355	rs17814147:111814893:A:G	110055135	110055135	0	2.55713e-07	-0.436473	0.08083	FALSE	-58767	Distal mGene mQTLs
cg15635851	chr10	109923585	109923584	rs61881634:111844764:A:C	110085006	110085006	0	4.36574e-09	0.372099	0.0596805	TRUE	-88638	Distal non-mGene mQTLs
cg15054954	chr10	110207129	110207128	rs369184932:111970831:CTT:C	110211073	110211075	0	1.56218e-07	-0.152134	0.0276361	TRUE	-3468	Distal mGene mQTLs
cg12661744	chr10	110747565	110747564	rs143219377:112507652:A:G	110747894	110747894	0	1.16967e-07	0.150284	0.0270004	TRUE	-103497	Distal mGene mQTLs
cg09108052	chr10	110790915	110790914	rs11593906:112558337:G:A	110798579	110798579	0	5.35063e-08	0.158696	0.0276997	FALSE	-154182	Distal mGene mQTLs
cg03886135	chr10	110797583	110797582	rs11593906:112558337:G:A	110798579	110798579	0	9.44437e-08	0.103971	0.0185302	FALSE	-154182	Distal mGene mQTLs
cg20218110	chr10	114632160	114632159	rs11594779:116370918:A:G	114611159	114611159	0	1.73587e-18	-0.285393	0.0283993	TRUE	73844	Distal mGene mQTLs
cg12742577	chr10	114642979	114642978	rs11594779:116370918:A:G	114611159	114611159	0	2.9148e-07	-0.158769	0.0295562	TRUE	73844	Distal mGene mQTLs
cg03850986	chr10	114648624	114648623	rs11594779:116370918:A:G	114611159	114611159	0	2.09555e-10	-0.227902	0.0334197	TRUE	73844	Distal mGene mQTLs
cg01315572	chr10	114631792	114631791	rs11599283:116370934:C:A	114611175	114611175	0	3.04999e-20	-0.532375	0.0496967	TRUE	73828	Distal mGene mQTLs
cg03223072	chr10	114639155	114639154	rs11599283:116370934:C:A	114611175	114611175	0	4.95287e-17	-0.222601	0.0234474	TRUE	73828	Distal mGene mQTLs
cg12403162	chr10	114634799	114634798	rs35745645:116371229:G:GA	114611470	114611470	0	3.69129e-07	-0.156565	0.0294249	TRUE	73533	Distal mGene mQTLs
cg04055345	chr10	114505104	114505103	rs11196819:116393326:G:C	114633567	114633567	0	8.26933e-08	-0.123034	0.0218197	FALSE	51436	Distal mGene mQTLs
cg01449818	chr10	114526847	114526846	rs11196819:116393326:G:C	114633567	114633567	0	2.75271e-17	-0.216382	0.0225598	FALSE	51436	Distal mGene mQTLs
cg06769992	chr10	114577025	114577024	rs11196819:116393326:G:C	114633567	114633567	0	1.04746e-13	-0.221835	0.0270823	FALSE	51436	Distal mGene mQTLs
cg15294435	chr10	114631709	114631708	rs11196819:116393326:G:C	114633567	114633567	0	9.88665e-25	-0.42493	0.0342889	FALSE	51436	Distal mGene mQTLs
cg12736146	chr10	114631850	114631849	rs11196819:116393326:G:C	114633567	114633567	0	7.96312e-22	-0.399757	0.0353564	FALSE	51436	Distal mGene mQTLs
cg18680346	chr10	114632006	114632005	rs11196819:116393326:G:C	114633567	114633567	0	3.06989e-17	-0.798715	0.0834311	FALSE	51436	Distal mGene mQTLs
cg19936380	chr10	114632358	114632357	rs11196819:116393326:G:C	114633567	114633567	0	9.47589e-14	-0.235879	0.0287357	FALSE	51436	Distal mGene mQTLs
cg25722735	chr10	114632375	114632374	rs11196819:116393326:G:C	114633567	114633567	0	2.85836e-08	-0.136518	0.0233046	TRUE	51436	Distal mGene mQTLs
cg08587685	chr10	114632448	114632447	rs11196819:116393326:G:C	114633567	114633567	0	2.25719e-16	-0.314109	0.0339953	FALSE	51436	Distal mGene mQTLs
cg18574731	chr10	114655310	114655309	rs11196819:116393326:G:C	114633567	114633567	0	5.02391e-14	-0.182163	0.0218978	FALSE	51436	Distal mGene mQTLs
cg21050356	chr10	114655856	114655855	rs11196819:116393326:G:C	114633567	114633567	0	1.34417e-19	-0.366442	0.0349999	FALSE	51436	Distal mGene mQTLs
cg11243835	chr10	114822050	114822049	rs117282608:116396534:G:A	114636775	114636775	0	8.10391e-07	0.580747	0.112789	TRUE	-134428	Distal non-mGene mQTLs
cg03668323	chr10	114497226	114497225	rs1109267:116405348:T:C	114645589	114645589	0	4.9547e-07	-0.0721962	0.0137335	TRUE	39414	Distal mGene mQTLs
cg26760942	chr10	114515471	114515470	rs1109267:116405348:T:C	114645589	114645589	0	7.29205e-17	-0.270738	0.0287132	FALSE	39414	Distal mGene mQTLs
cg11115176	chr10	114548781	114548780	rs1109267:116405348:T:C	114645589	114645589	0	1.40663e-09	-0.174768	0.0270703	FALSE	39414	Distal mGene mQTLs
cg02970258	chr10	114576299	114576298	rs1109267:116405348:T:C	114645589	114645589	0	2.45516e-09	-0.164298	0.0258827	FALSE	39414	Distal mGene mQTLs
cg06848487	chr10	114577445	114577444	rs1109267:116405348:T:C	114645589	114645589	0	2.94792e-09	-0.175898	0.0278671	FALSE	39414	Distal mGene mQTLs
cg02068171	chr10	114632844	114632843	rs1109267:116405348:T:C	114645589	114645589	0	8.83392e-09	-0.17156	0.0281475	FALSE	39414	Distal mGene mQTLs
cg16726772	chr10	114658839	114658838	rs1109267:116405348:T:C	114645589	114645589	0	2.44822e-10	-0.173811	0.0255977	FALSE	39414	Distal mGene mQTLs
cg10165222	chr10	117375102	117375101	exm859195	117375104	117375104	0	5.50806e-07	-0.196188	0.0374847	TRUE	363	Promoter mGene mQTLs
cg17875135	chr10	122466463	122466462	rs1810391:124236719:A:G	122477203	122477203	0	4.08898e-08	-0.219362	0.0379216	FALSE	-15678	Distal mGene mQTLs
cg23238440	chr10	122463301	122463300	rs4752700	122478096	122478096	1	3.84614e-08	-0.587655	0.101369	FALSE	-16571	Distal mGene mQTLs
cg04970100	chr10	122474331	122474330	rs4752700	122478096	122478096	0	3.53818e-17	-0.844604	0.0884431	FALSE	-16571	Distal mGene mQTLs
cg06241170	chr10	122490479	122490478	rs4752700	122478096	122478096	0	1.08369e-08	-0.150646	0.024883	FALSE	-16571	Distal mGene mQTLs
cg22701672	chr10	122499062	122499061	rs11200645:124238153:C:T	122478637	122478637	0	1.27457e-06	0.152237	0.0301558	FALSE	-17112	Distal mGene mQTLs
cg16466810	chr10	122474657	122474656	rs4991294:124238188:T:G	122478672	122478672	0	2.95074e-18	-0.873667	0.0877023	TRUE	-17147	Distal mGene mQTLs
cg23402541	chr10	122487631	122487630	rs4991294:124238188:T:G	122478672	122478672	1	2.58602e-09	-0.636324	0.100404	TRUE	-17147	Distal mGene mQTLs
cg23238440	chr10	122463301	122463300	rs5788561:124243660:CA:C	122484144	122484145	0	3.92447e-11	1.30471	0.182954	TRUE	-22619	Distal mGene mQTLs
cg04970100	chr10	122474331	122474330	rs5788561:124243660:CA:C	122484144	122484145	1	1.90085e-07	1.05629	0.193345	TRUE	-22619	Distal mGene mQTLs
cg16466810	chr10	122474657	122474656	rs5788561:124243660:CA:C	122484144	122484145	1	1.34344e-07	1.06811	0.192911	TRUE	-22619	Distal mGene mQTLs
cg23402541	chr10	122487631	122487630	rs5788561:124243660:CA:C	122484144	122484145	0	1.29213e-10	1.27413	0.184385	TRUE	-22619	Distal mGene mQTLs
cg21647373	chr10	122491680	122491679	rs2246731:124254180:G:A	122494664	122494664	0	2.02917e-12	0.498535	0.0650103	FALSE	-33139	Distal mGene mQTLs
cg04426802	chr10	124626112	124626111	rs3781476:126314475:C:T	124625906	124625906	0	5.40933e-15	-0.63426	0.0728863	FALSE	118363	Distal mGene mQTLs
cg07984614	chr10	124626230	124626229	rs3781476:126314475:C:T	124625906	124625906	0	1.12251e-16	-0.670738	0.0716839	FALSE	118363	Distal mGene mQTLs
cg20435097	chr10	124632256	124632255	rs3781472:126316951:C:T	124628382	124628382	0	2.0647e-10	-0.148102	0.0217089	FALSE	115887	Distal mGene mQTLs
cg16404170	chr10	124642308	124642307	rs61870502:126330758:C:T	124642189	124642189	0	2.51301e-07	0.416566	0.0770901	FALSE	102080	Distal mGene mQTLs
cg07081759	chr10	124642337	124642336	rs61870502:126330758:C:T	124642189	124642189	0	6.21815e-09	0.448766	0.0727937	FALSE	102080	Distal mGene mQTLs
cg26725552	chr10	124626190	124626189	rs3781454:126348565:G:A	124659996	124659996	0	6.89022e-07	0.147684	0.0284843	FALSE	84273	Distal mGene mQTLs
cg03105206	chr10	124626723	124626722	rs3781454:126348565:G:A	124659996	124659996	0	1.43686e-11	0.214409	0.0293088	FALSE	84273	Distal mGene mQTLs
cg00949224	chr10	124721778	124721777	rs3781453	124660192	124660192	0	3.97403e-08	-0.198604	0.0342985	FALSE	84077	Distal mGene mQTLs
cg26853045	chr10	124743281	124743280	NHGRI_notinECorHUNT_chr10_126426148	124737579	124737579	0	1.15722e-13	-0.15993	0.0195662	FALSE	-1681879	Distal mGene mQTLs
cg09045849	chr10	125045185	125045184	rs3781394:126726885:G:A	125038316	125038316	0	1.23239e-09	0.274617	0.0423684	FALSE	122854	Distal mGene mQTLs
cg00317852	chr10	125039633	125039632	rs10901854:126733643:T:C	125045074	125045074	0	2.58832e-08	0.161997	0.0275589	TRUE	116096	Distal mGene mQTLs
cg23000734	chr10	125162255	125162254	rs7086481:126844523:T:A	125155954	125155954	0	2.10043e-08	0.11396	0.0192477	FALSE	5216	Distal mGene mQTLs
cg03862225	chr10	125161886	125161885	rs11355614:126845962:TA:T	125157393	125157394	0	2.97915e-18	0.389504	0.0391062	TRUE	3777	Distal mGene mQTLs
cg08200419	chr10	132447977	132447976	rs61865614:134266326:C:T	132452822	132452822	0	1.26425e-09	-0.513315	0.0792554	TRUE	-8495	Distal mGene mQTLs
cg17658113	chr11	1392053	1392052	rs4881729	1387360	1387360	0	3.23253e-09	-0.154102	0.0244841	FALSE	2539	Distal mGene mQTLs
cg08208480	chr11	1391864	1391863	rs7395567:1413056:T:C	1391826	1391826	0	1.22461e-18	0.733493	0.0725741	TRUE	-1927	Promoter mGene mQTLs
cg17416644	chr11	1453612	1453611	rs4072884:1482720:C:T	1461490	1461490	0	1.83112e-15	0.286121	0.0321975	FALSE	-71591	Distal mGene mQTLs
cg06231783	chr11	1453819	1453818	rs4072884:1482720:C:T	1461490	1461490	0	8.09315e-22	0.244228	0.0216057	FALSE	-71591	Distal mGene mQTLs
cg12578013	chr11	8057280	8057279	rs61879615:8081940:A:C	8060393	8060393	0	3.86537e-07	-0.111201	0.0209383	FALSE	-41149	Distal mGene mQTLs
cg06365118	chr11	8774182	8774181	rs183796111:8828185:A:C	8806638	8806638	0	4.51688e-10	0.8326	0.124752	TRUE	-37860	Distal non-mGene mQTLs
cg20671944	chr11	8774269	8774268	rs183796111:8828185:A:C	8806638	8806638	0	7.89249e-08	0.8551	0.151388	TRUE	-37860	Distal non-mGene mQTLs
cg08710564	chr11	8807892	8807891	rs10743091:8833359:C:T	8811812	8811812	0	2.65355e-10	0.220329	0.0325215	FALSE	99139	Distal mGene mQTLs
cg16294659	chr11	13278716	13278715	rs4353253:13310263:G:C	13288716	13288716	0	8.35631e-27	0.352888	0.0267983	FALSE	-12064	Distal mGene mQTLs
cg25140936	chr11	13276487	13276486	rs60521023:13314102:A:AT	13292555	13292555	0	4.49837e-08	0.142806	0.0247713	TRUE	-15903	Distal mGene mQTLs
cg04321426	chr11	13298691	13298690	rs6486116:13319838:A:C	13298291	13298291	0	5.67561e-10	0.155849	0.0235048	FALSE	-21639	Distal mGene mQTLs
cg09783949	chr11	13324761	13324760	GIANT-BMI-Euro-Sex-Combined_chr11_13345593	13324046	13324046	0	2.12203e-08	-0.149132	0.025197	FALSE	-68941	Distal mGene mQTLs
cg25033364	chr11	17739056	17739055	rs76508724:16984449:C:T	16962902	16962902	0	2.21821e-08	0.311425	0.0526979	TRUE	12111	Distal non-mGene mQTLs
cg11089291	chr11	16975026	16975025	rs12291049:16995350:C:T	16973803	16973803	0	3.81841e-13	0.583806	0.0732994	TRUE	40640	Distal mGene mQTLs
cg15378786	chr11	17014591	17014590	rs7930890:17024699:G:A	17003152	17003152	0	2.42816e-23	0.290963	0.0245057	FALSE	11291	Distal mGene mQTLs
cg03198203	chr11	17012938	17012937	rs34437677:17027168:C:A	17005621	17005621	0	4.63951e-14	-0.228107	0.0273753	FALSE	8822	Distal mGene mQTLs
cg15084286	chr11	17014596	17014595	rs34502475:17030940:G:A	17009393	17009393	0	1.90095e-20	-0.277004	0.025673	FALSE	5050	Distal mGene mQTLs
cg04973751	chr11	35308197	35308196	rs3794086:35329809:C:A	35308262	35308262	0	2.10581e-23	-0.386782	0.0325126	TRUE	111801	Distal mGene mQTLs
cg09848191	chr11	35322210	35322209	rs2273688:35338743:T:C	35317196	35317196	0	6.01438e-29	-0.447228	0.0320041	FALSE	102867	Distal mGene mQTLs
cg10331829	chr11	35322243	35322242	rs2273688:35338743:T:C	35317196	35317196	0	2.33848e-11	-0.235334	0.0325654	FALSE	102867	Distal mGene mQTLs
cg14746605	chr11	35352790	35352789	rs2273688:35338743:T:C	35317196	35317196	0	2.28777e-14	-0.929697	0.109962	FALSE	102867	Distal mGene mQTLs
cg13971030	chr11	35345175	35345174	rs4237664:35357316:C:G	35335769	35335769	0	5.76538e-09	-0.191542	0.0309944	FALSE	84294	Distal mGene mQTLs
cg22934516	chr11	35392405	35392404	rs60103066:35426965:AT:A	35405418	35405419	0	1.79317e-07	0.170899	0.0312109	TRUE	14645	Distal mGene mQTLs
cg00458322	chr11	35404404	35404403	rs10742347:35430424:A:G	35408877	35408877	0	5.72936e-19	-0.442855	0.0432821	FALSE	11186	Distal mGene mQTLs
cg24190415	chr11	35419466	35419465	rs1923294:35439816:A:G	35418269	35418269	0	6.86298e-10	0.17276	0.0261987	FALSE	1794	Promoter mGene mQTLs
cg07358852	chr11	35375361	35375360	rs1173923:35451976:G:T	35430429	35430429	0	8.82616e-16	-0.25794	0.0286281	FALSE	-10366	Distal mGene mQTLs
cg27610672	chr11	35377450	35377449	rs1173923:35451976:G:T	35430429	35430429	0	1.07889e-17	-0.303258	0.0311125	FALSE	-10366	Distal mGene mQTLs
cg19112204	chr11	35404005	35404004	rs1173923:35451976:G:T	35430429	35430429	0	5.40726e-12	-0.172246	0.0229886	FALSE	-10366	Distal mGene mQTLs
cg14479638	chr11	35402798	35402797	rs7767:35453719:C:T	35432172	35432172	0	2.18904e-19	-0.30742	0.0295885	FALSE	-12109	Distal mGene mQTLs
cg23097878	chr11	45858180	45858179	rs10838524:45870177:A:G	45848626	45848626	0	1.24256e-07	0.101935	0.0183559	FALSE	-1508	Promoter mGene mQTLs
ch.11.939596F	chr11	45860216	45860215	rs141467132:45875196:AC:A	45853645	45853646	0	5.81733e-27	0.392226	0.0296528	FALSE	-6527	Distal mGene mQTLs
cg05861348	chr11	45923240	45923239	rs56148819:45944290:T:C	45922739	45922739	0	5.41299e-16	-0.407185	0.0447822	TRUE	-1118	Distal non-mGene mQTLs
cg24204282	chr11	45923370	45923369	rs56148819:45944290:T:C	45922739	45922739	0	6.70494e-14	-0.4006	0.0484477	TRUE	-1118	Distal non-mGene mQTLs
cg16389345	chr11	46675833	46675832	rs4752926:46692870:C:T	46671320	46671320	0	3.87496e-10	0.136575	0.0203747	FALSE	-53793	Distal non-mGene mQTLs
cg23350132	chr11	47274690	47274689	rs10501320	47272248	47272248	0	8.92288e-12	0.217095	0.0293288	FALSE	-3087	Distal mGene mQTLs
cg12841566	chr11	47274767	47274766	rs10501320	47272248	47272248	0	7.65461e-14	0.323925	0.039284	FALSE	-3087	Distal mGene mQTLs
cg20075042	chr11	47275913	47275912	rs10501320	47272248	47272248	0	1.95113e-07	0.137104	0.0251213	FALSE	-3087	Distal mGene mQTLs
cg27221977	chr11	47275929	47275928	rs10501320	47272248	47272248	0	5.31367e-09	0.184146	0.0297199	FALSE	-3087	Distal mGene mQTLs
cg16983008	chr11	47311851	47311850	rs10501320	47272248	47272248	0	8.50082e-07	0.157267	0.0306061	FALSE	-3087	Distal mGene mQTLs
cg03839626	chr11	57712424	57712423	rs36089922:57438292:AT:A	57670820	57670821	0	1.22515e-11	0.107418	0.0146255	TRUE	-3073	Distal non-mGene mQTLs
cg12329048	chr11	57704486	57704485	rs71061525:57441788:G:GT	57674316	57674316	0	6.62665e-08	-0.146195	0.0257167	TRUE	-6569	Distal non-mGene mQTLs
cg07849136	chr11	61125996	61125995	11:60889762:TGGTG:T	61122290	61122294	0	2.54598e-08	-0.569168	0.0967711	TRUE	-19895	Distal mGene mQTLs
cg07849136	chr11	61125996	61125995	rs74555568:60907886:C:T	61140414	61140414	1	1.74996e-07	-0.95089	0.173494	FALSE	-38019	Distal mGene mQTLs
cg07179634	chr11	61139111	61139110	rs10792305:60910618:T:C	61143146	61143146	0	5.3019e-10	0.0992047	0.0149326	FALSE	18471	Distal mGene mQTLs
cg02920403	chr11	61141538	61141537	rs614875:60911892:A:G	61144420	61144420	0	9.34254e-22	-0.803623	0.0712399	TRUE	17197	Distal mGene mQTLs
cg09664380	chr11	61146517	61146516	rs614875:60911892:A:G	61144420	61144420	0	3.16294e-15	-0.205213	0.0233368	TRUE	17197	Distal mGene mQTLs
cg26241240	chr11	61126190	61126189	rs519296	61152282	61152282	0	2.74774e-18	-0.261575	0.0262269	FALSE	-49887	Distal mGene mQTLs
cg23043946	chr11	61139506	61139505	rs519296	61152282	61152282	0	2.02323e-22	-0.502622	0.0435959	TRUE	9335	Distal mGene mQTLs
cg06573573	chr11	61951501	61951500	rs972355:61717337:G:C	61949865	61949865	0	1.2318e-06	0.192978	0.0381682	FALSE	-44	Promoter mGene mQTLs
cg12961922	chr11	61899422	61899421	rs200389888:61720105:ATT:A	61952633	61952635	0	1.14021e-06	0.120634	0.0237785	TRUE	-2812	Distal non-mGene mQTLs
cg23584647	chr11	61949720	61949719	rs2736595:61720538:G:A	61953066	61953066	0	4.12465e-15	0.199563	0.0228117	FALSE	-3245	Distal mGene mQTLs
cg09726693	chr11	61949924	61949923	rs2736595:61720538:G:A	61953066	61953066	0	1.21596e-06	0.0830114	0.0164091	FALSE	-3245	Distal mGene mQTLs
cg15456821	chr11	61949754	61949753	rs2727272:61721198:C:A	61953726	61953726	0	3.90232e-18	0.398532	0.0401926	TRUE	-3905	Distal mGene mQTLs
cg11562596	chr11	61950295	61950294	rs2524294:61721234:G:A	61953762	61953762	0	5.38337e-32	0.969653	0.0640788	FALSE	-3941	Distal mGene mQTLs
cg06068935	chr11	61949534	61949533	rs2668899:61721639:A:G	61954167	61954167	0	3.96471e-26	0.648033	0.0501768	FALSE	-4346	Distal mGene mQTLs
cg05481452	chr11	61950213	61950212	rs2668899:61721639:A:G	61954167	61954167	0	2.84969e-29	0.77321	0.0548508	FALSE	-4346	Distal mGene mQTLs
cg20584555	chr11	61950309	61950308	rs2668899:61721639:A:G	61954167	61954167	0	1.62803e-32	0.824846	0.0538014	FALSE	-4346	Distal mGene mQTLs
cg07800325	chr11	61955466	61955465	rs909268:61723703:A:T	61956231	61956231	0	2.55123e-07	-0.165837	0.0307085	FALSE	-6410	Distal mGene mQTLs
cg24944820	chr11	61955906	61955905	rs909268:61723703:A:T	61956231	61956231	0	5.81825e-08	-0.122512	0.021449	FALSE	-6410	Distal mGene mQTLs
cg22892043	chr11	61964459	61964458	rs17156609:61731977:G:A	61964505	61964505	0	1.38538e-07	0.59323	0.107269	FALSE	-14684	Distal mGene mQTLs
cg13882100	chr11	62122450	62122449	rs1849352:61822329:G:C	62054857	62054857	0	4.86173e-07	-0.182341	0.0346585	TRUE	18195	Distal non-mGene mQTLs
cg12316258	chr11	62612945	62612944	rs113222038:62380027:C:T	62612555	62612555	0	1.80968e-11	0.286838	0.0394365	FALSE	210	Promoter mGene mQTLs
cg27305510	chr11	62667245	62667244	exm919160	62666701	62666701	0	8.14447e-13	-0.239263	0.0305536	FALSE	-1523	Distal non-mGene mQTLs
cg02375832	chr11	62670144	62670143	exm919160	62666701	62666701	0	4.75091e-09	-0.191567	0.0308075	FALSE	-1523	Distal non-mGene mQTLs
cg26363414	chr11	62671186	62671185	exm919160	62666701	62666701	0	1.61812e-17	-0.296318	0.0306118	FALSE	5554	Distal mGene mQTLs
cg17998964	chr11	63888432	63888431	rs578001:63792977:A:G	64025505	64025505	0	3.68995e-07	0.0951572	0.0178836	TRUE	-50898	Distal non-mGene mQTLs
cg22796860	chr11	64060875	64060874	rs11231682:63817673:C:G	64050201	64050201	1	1.62666e-06	1.20794	0.241898	TRUE	115905	Distal mGene mQTLs
cg22796860	chr11	64060875	64060874	rs477400:63817799:G:C	64050327	64050327	0	1.0364e-10	0.959074	0.13797	TRUE	115779	Distal mGene mQTLs
cg14956360	chr11	64219326	64219325	rs11603192:63927695:A:G	64160223	64160223	0	5.55424e-07	0.105555	0.020175	FALSE	5883	Distal non-mGene mQTLs
cg05934061	chr11	64181722	64181721	rs11603384	64181623	64181623	0	1.76613e-17	-0.261721	0.0270783	FALSE	-15517	Distal non-mGene mQTLs
cg04055107	chr11	65859264	65859263	rs1939212:65626701:C:T	65859230	65859230	0	3.12568e-29	0.410239	0.0291333	FALSE	-2104	Promoter mGene mQTLs
cg01372058	chr11	66051978	66051977	rs144385038:65842932:C:T	66075461	66075461	0	2.14853e-09	0.144717	0.0227048	FALSE	-24732	Distal mGene mQTLs
cg19026260	chr11	66277881	66277880	rs489337:65854561:A:G	66087090	66087090	0	5.82199e-07	0.22832	0.0437252	FALSE	-36361	Distal non-mGene mQTLs
cg24089521	chr11	66049512	66049511	rs34238902:65906434:G:GGTA	66138963	66138963	0	6.96714e-12	0.140161	0.0188215	FALSE	-88234	Distal non-mGene mQTLs
cg13851621	chr11	67044792	67044791	rs145144780:66623119:C:T	66855648	66855648	0	1.1989e-06	0.605284	0.119573	TRUE	999	Distal non-mGene mQTLs
cg18291331	chr11	66860820	66860819	rs2513658:66628249:G:A	66860778	66860778	0	3.86788e-10	-0.129205	0.0192741	FALSE	97598	Distal mGene mQTLs
cg09416453	chr11	66920177	66920176	rs2513658:66628249:G:A	66860778	66860778	0	9.35557e-10	-0.158938	0.024322	TRUE	97598	Distal mGene mQTLs
cg11525980	chr11	66883045	66883044	rs117303800:66650531:A:T	66883060	66883060	0	7.76476e-09	-0.159108	0.0259948	FALSE	75316	Distal mGene mQTLs
cg13360208	chr11	68145384	68145383	rs11228131	68102854	68102854	0	2.15032e-09	0.164818	0.0258592	FALSE	18590	Distal non-mGene mQTLs
cg12323168	chr11	68825898	68825897	rs11228369:68594136:C:G	68826668	68826668	0	1.60968e-10	0.248979	0.0362469	TRUE	17742	Distal mGene mQTLs
cg22911054	chr11	68835912	68835911	rs11228377:68603346:T:C	68835878	68835878	0	1.04818e-07	0.177078	0.031683	TRUE	8532	Distal mGene mQTLs
cg02939879	chr11	68994776	68994775	rs150561761:68604318:G:GGGAA	68836850	68836850	0	7.74413e-08	0.193802	0.0342869	TRUE	7560	Distal non-mGene mQTLs
cg10879867	chr11	68854796	68854795	rs71465408:68617022:A:G	68849554	68849554	0	1.1911e-18	0.281669	0.0278566	FALSE	-5144	Distal non-mGene mQTLs
cg11245990	chr11	68854502	68854501	rs7104351:68617886:A:G	68850418	68850418	0	4.80008e-33	0.56413	0.0363128	FALSE	-6008	Distal non-mGene mQTLs
cg07511668	chr11	68854710	68854709	rs7104351:68617886:A:G	68850418	68850418	0	1.36721e-29	0.572067	0.0402377	FALSE	-6008	Distal non-mGene mQTLs
cg12536891	chr11	72333786	72333785	rs4943891:72118827:C:A	72407783	72407783	0	3.01263e-13	-0.974954	0.121773	TRUE	26897	Distal mGene mQTLs
cg12536891	chr11	72333786	72333785	rs117703155:72146430:C:T	72435386	72435386	1	3.10021e-10	1.13264	0.167911	TRUE	-706	Promoter mGene mQTLs
cg21622630	chr11	72447472	72447471	rs72954113:72158572:G:A	72447528	72447528	0	1.73651e-10	0.290005	0.0423072	FALSE	-36812	Distal non-mGene mQTLs
cg03706479	chr11	73788865	73788864	rs7946127:73341588:A:G	73630543	73630543	0	1.62473e-09	-0.414471	0.0644776	FALSE	9936	Distal non-mGene mQTLs
cg01430283	chr11	73654415	73654414	rs622833	73654459	73654459	0	2.93768e-11	-0.205876	0.0286549	FALSE	-8281	Distal mGene mQTLs
cg19644997	chr11	75443157	75443156	rs1790160:75180228:T:C	75469183	75469183	0	4.08302e-07	0.0959882	0.0181144	TRUE	56720	Distal mGene mQTLs
cg12318269	chr11	75525737	75525736	rs1790305:75232607:T:C	75521562	75521562	0	3.60906e-18	0.282385	0.028442	FALSE	4341	Distal mGene mQTLs
cg26854012	chr11	75583602	75583601	rs589063:75297804:C:A	75586759	75586759	0	8.67935e-13	-0.235641	0.0301344	TRUE	-3563	Distal non-mGene mQTLs
cg09786210	chr11	75582755	75582754	rs588955	75586839	75586839	0	2.99148e-12	0.155944	0.0205214	FALSE	-3643	Distal non-mGene mQTLs
cg22138216	chr11	78078202	78078201	rs7943716:76837499:G:A	77126453	77126453	0	1.95769e-06	-0.0971183	0.0196128	TRUE	1811	Distal non-mGene mQTLs
cg08294946	chr11	77127515	77127514	rs7104633:76840566:G:C	77129520	77129520	0	6.28078e-08	0.508171	0.0892165	FALSE	-1256	Promoter mGene mQTLs
cg03991848	chr11	77127453	77127452	rs7121629	77129752	77129752	0	2.63222e-12	0.306187	0.0401713	FALSE	-1488	Promoter mGene mQTLs
cg17441778	chr11	77127632	77127631	rs7121629	77129752	77129752	0	6.75504e-07	0.210849	0.0406332	TRUE	-1488	Promoter mGene mQTLs
cg02420069	chr11	77127704	77127703	rs7116928:76840972:C:T	77129926	77129926	0	3.59846e-08	0.243619	0.0419248	FALSE	-1662	Promoter mGene mQTLs
cg02174203	chr11	77137009	77137008	rs948969	77136989	77136989	0	1.99414e-10	-0.139869	0.0204824	FALSE	-8725	Distal mGene mQTLs
cg05258601	chr11	83713874	83713873	rs139878582:82728375:G:C	83017333	83017333	0	2.88385e-07	-0.478631	0.089063	TRUE	21782	Distal non-mGene mQTLs
cg11117684	chr11	100728664	100728663	rs201901540:100549229:C:CT	100678498	100678498	0	5.01863e-07	-0.234142	0.0445633	TRUE	-12039	Distal non-mGene mQTLs
cg19812747	chr11	111605253	111605252	rs10891288:111552053:A:C	111681329	111681329	0	5.40928e-08	0.224736	0.0392422	FALSE	-78938	Distal mGene mQTLs
cg18672335	chr11	111763598	111763597	rs7106104:111635655:T:C	111764931	111764931	0	1.82771e-15	-0.26483	0.0298005	FALSE	1496	Promoter mGene mQTLs
cg09843482	chr11	113114510	113114509	rs1436110:112965769:G:A	113095047	113095047	0	7.23459e-11	0.153229	0.0218329	FALSE	-133800	Distal mGene mQTLs
cg12946808	chr11	115623192	115623191	rs7116491:115491481:C:T	115620763	115620763	0	1.72298e-08	0.196603	0.0329825	FALSE	-38466	Distal non-mGene mQTLs
cg01033865	chr11	115760179	115760178	rs11215642:115501331:C:G	115630613	115630613	0	2.86045e-13	0.228186	0.0284683	FALSE	-48316	Distal non-mGene mQTLs
cg15630907	chr11	115760204	115760203	rs3949060	115630625	115630625	0	5.98297e-09	0.159525	0.0258442	FALSE	-48328	Distal non-mGene mQTLs
cg13839457	chr11	115760172	115760171	rs2515302:115502223:A:G	115631505	115631505	0	2.29156e-10	0.162324	0.0238623	FALSE	-49208	Distal non-mGene mQTLs
cg05578358	chr11	115760383	115760382	rs1618710:115515974:T:A	115645256	115645256	0	6.45574e-10	0.169958	0.0257281	FALSE	-62959	Distal non-mGene mQTLs
cg14363890	chr11	115672590	115672589	rs11606322:115543613:A:G	115672895	115672895	0	8.64139e-08	-0.338234	0.0600827	TRUE	-90598	Distal non-mGene mQTLs
cg05256304	chr11	117099155	117099154	rs7117123:116853686:T:A	116982970	116982970	0	6.13615e-21	0.331782	0.0302331	FALSE	115467	Distal mGene mQTLs
cg12696655	chr11	116958358	116958357	rs10892060:116881662:C:A	117010946	117010946	0	3.65065e-09	-0.103886	0.0165685	TRUE	87491	Distal mGene mQTLs
cg20608306	chr11	117098975	117098974	rs10892073:116969390:C:T	117098674	117098674	0	4.00257e-24	0.405939	0.0333674	FALSE	-237	Promoter mGene mQTLs
cg10163427	chr11	117099284	117099283	rs10892073:116969390:C:T	117098674	117098674	0	4.99452e-12	0.206452	0.0275014	TRUE	-237	Promoter mGene mQTLs
cg05122696	chr11	117099287	117099286	rs10892073:116969390:C:T	117098674	117098674	0	3.14731e-16	0.282326	0.0307414	TRUE	-237	Promoter mGene mQTLs
cg11494887	chr11	117330379	117330378	rs484553:117201097:G:T	117330381	117330381	0	1.47141e-07	-0.23547	0.0426765	FALSE	-15824	Distal mGene mQTLs
cg09519504	chr11	117444044	117444043	rs58248287:117476375:A:G	117605660	117605660	0	1.93095e-12	-0.691729	0.0900991	TRUE	211865	Distal mGene mQTLs
cg00065613	chr11	117619302	117619301	rs4936389:117488717:T:C	117618002	117618002	0	6.00145e-08	-0.114307	0.020035	TRUE	199523	Distal mGene mQTLs
cg10274934	chr11	117663370	117663369	rs7111427:117534083:G:A	117663368	117663368	0	2.33576e-19	-0.311428	0.030005	FALSE	154157	Distal mGene mQTLs
cg01330909	chr11	117713933	117713932	Neandertal_chr11_117597518	117726803	117726803	0	1.40189e-31	1.3841	0.0924382	TRUE	220007	Distal mGene mQTLs
cg12259643	chr11	117730699	117730698	rs4142639:117604493:A:G	117733778	117733778	0	5.71084e-15	-0.363064	0.0417662	FALSE	83747	Distal mGene mQTLs
cg21640587	chr11	117797324	117797323	rs12363806:117658211:G:A	117787496	117787496	0	9.02308e-12	0.144789	0.0195659	FALSE	30029	Distal mGene mQTLs
cg10041129	chr11	117814836	117814835	rs10892172:117672474:C:A	117801759	117801759	0	8.7674e-07	0.1308	0.0254892	TRUE	-189742	Distal non-mGene mQTLs
cg21014159	chr11	117797321	117797320	rs12364667:117675286:T:G	117804571	117804571	0	1.3654e-13	0.156596	0.0192263	FALSE	12954	Distal mGene mQTLs
cg11333886	chr11	117797328	117797327	rs12364667:117675286:T:G	117804571	117804571	0	3.90132e-09	0.135735	0.0216932	FALSE	12954	Distal mGene mQTLs
cg07621104	chr11	117797326	117797325	rs182928887:117682935:A:G	117812220	117812220	0	2.71827e-10	0.176815	0.0261162	FALSE	5305	Distal mGene mQTLs
cg07367495	chr11	117817618	117817617	rs610226:117688225:G:C	117817510	117817510	0	5.46202e-11	-0.296641	0.0419558	FALSE	15	Distal non-mGene mQTLs
cg26293590	chr11	117817621	117817620	rs610226:117688225:G:C	117817510	117817510	0	2.00881e-11	-0.281138	0.0387545	FALSE	15	Distal non-mGene mQTLs
cg23323203	chr11	117817624	117817623	rs610226:117688225:G:C	117817510	117817510	0	3.9101e-07	-0.179198	0.0337575	FALSE	15	Distal non-mGene mQTLs
cg01003613	chr11	118919101	118919100	rs11217089:118789878:G:C	118919169	118919169	0	3.41058e-14	0.373851	0.0445815	TRUE	-8461	Distal non-mGene mQTLs
cg11348760	chr11	119084562	119084561	rs686624:118955509:T:A	119084799	119084799	0	5.64027e-18	0.480962	0.0488058	FALSE	67	Promoter mGene mQTLs
cg26145333	chr11	119088032	119088031	rs17075:118959331:G:A	119088621	119088621	0	2.70243e-07	-0.102586	0.0190395	FALSE	-3755	Distal mGene mQTLs
cg11367048	chr11	119088439	119088438	rs17075:118959331:G:A	119088621	119088621	0	4.15345e-20	-0.394631	0.0370128	FALSE	-3755	Distal mGene mQTLs
cg00383220	chr11	119093171	119093170	rs494048:118961231:T:C	119090521	119090521	0	7.30058e-11	-0.136309	0.0194268	FALSE	-5655	Distal mGene mQTLs
cg12768383	chr11	119096829	119096828	rs640603:118964330:G:A	119093620	119093620	0	3.76808e-07	-0.118503	0.0222902	FALSE	1847	Promoter mGene mQTLs
cg25646780	chr11	119106670	119106669	rs7350:118965048:G:A	119094338	119094338	0	5.0593e-10	0.162019	0.0243548	FALSE	1129	Distal non-mGene mQTLs
cg17681745	chr11	119364633	119364632	rs573396:119239375:G:A	119368665	119368665	0	5.87571e-09	-0.15722	0.025456	FALSE	13061	Distal mGene mQTLs
cg14154726	chr11	119365009	119365008	rs680268:119239689:C:T	119368979	119368979	0	1.9468e-08	-0.201747	0.0339865	TRUE	12747	Distal mGene mQTLs
cg01451205	chr11	119381501	119381500	rs658654:119248320:C:T	119377610	119377610	0	1.03586e-16	0.27495	0.0293427	FALSE	4116	Distal mGene mQTLs
cg09494431	chr11	119698742	119698741	rs4936492	119689739	119689739	0	2.33564e-07	-0.119458	0.0220432	FALSE	20181	Distal non-mGene mQTLs
cg01686933	chr11	119725395	119725394	rs10790339:119594525:C:T	119723815	119723815	0	4.30892e-12	0.214081	0.028417	FALSE	-13895	Distal non-mGene mQTLs
cg11899762	chr11	119717968	119717967	rs12421432:119603847:C:T	119733137	119733137	0	9.1326e-11	0.269065	0.0385761	FALSE	-23217	Distal non-mGene mQTLs
cg15392029	chr11	120325009	120325008	rs12290699:120195702:T:C	120324993	120324993	0	1.78484e-07	0.142924	0.0260971	FALSE	136	Promoter mGene mQTLs
cg06233497	chr11	120329545	120329544	rs11217821	120331390	120331390	0	1.08355e-07	0.190201	0.0340735	FALSE	-6261	Distal mGene mQTLs
cg23774385	chr11	120331348	120331347	rs11217821	120331390	120331390	0	2.02388e-14	0.242619	0.0286248	FALSE	-6261	Distal mGene mQTLs
cg12584626	chr11	120332821	120332820	rs71468750:120205560:G:A	120334851	120334851	0	1.72364e-09	0.175484	0.0273481	TRUE	2063	Distal non-mGene mQTLs
cg06979374	chr11	123585387	123585386	rs4936820:123394265:C:T	123523557	123523557	0	9.86937e-08	-0.170985	0.0305239	TRUE	-165129	Distal mGene mQTLs
cg19038246	chr11	123475071	123475070	rs4936820:123394265:C:T	123523557	123523557	0	1.40897e-10	-0.485124	0.0703697	TRUE	-165129	Distal non-mGene mQTLs
cg13709043	chr11	123475270	123475269	rs4936820:123394265:C:T	123523557	123523557	0	5.06268e-11	-0.572365	0.0807926	TRUE	-165129	Distal non-mGene mQTLs
cg05868564	chr11	123480790	123480789	rs4936820:123394265:C:T	123523557	123523557	0	4.96238e-10	-0.613784	0.0922133	TRUE	-165129	Distal non-mGene mQTLs
cg02613090	chr11	123510687	123510686	rs4936820:123394265:C:T	123523557	123523557	0	4.13288e-10	-0.427421	0.0638806	FALSE	-165129	Distal non-mGene mQTLs
cg24961445	chr11	123573929	123573928	rs17127435:123395348:A:G	123524640	123524640	0	3.86696e-11	-0.341836	0.0479158	TRUE	-166212	Distal mGene mQTLs
cg09612920	chr11	123568923	123568922	rs2846310:123397869:G:A	123527161	123527161	0	7.44767e-11	0.198	0.0282339	FALSE	-168733	Distal mGene mQTLs
cg12728690	chr11	123575663	123575662	rs2846310:123397869:G:A	123527161	123527161	0	2.30091e-10	0.297212	0.0436962	FALSE	-168733	Distal mGene mQTLs
cg16689797	chr11	123546753	123546752	rs7110875	123528233	123528233	0	5.53319e-07	-0.112012	0.0214057	FALSE	-169805	Distal mGene mQTLs
cg06797734	chr11	123577674	123577673	rs11219187:123399886:T:C	123529178	123529178	0	1.75746e-06	0.113926	0.0228943	FALSE	-170750	Distal mGene mQTLs
cg13364241	chr11	123557089	123557088	rs2714067:123400286:A:G	123529578	123529578	0	4.96015e-08	0.207254	0.0360767	FALSE	-171150	Distal mGene mQTLs
cg26041232	chr11	123577455	123577454	rs2846297:123403104:C:A	123532396	123532396	0	1.45634e-06	-0.122955	0.0245005	FALSE	-173968	Distal mGene mQTLs
cg11059493	chr11	123544056	123544055	rs63564062:123410149:AT:A	123539441	123539442	0	9.48055e-11	0.153967	0.0220965	TRUE	-181013	Distal mGene mQTLs
cg18041960	chr11	123544861	123544860	rs1295755:123412246:A:C	123541538	123541538	0	1.89479e-10	0.143558	0.0209932	FALSE	-183110	Distal mGene mQTLs
cg12548264	chr11	123558817	123558816	rs1296498:123417066:C:T	123546358	123546358	0	5.4441e-08	-0.227524	0.0397384	FALSE	-187930	Distal mGene mQTLs
cg01246664	chr11	123551220	123551219	rs56028970:123421955:T:C	123551247	123551247	0	4.32368e-13	-0.667	0.0839755	FALSE	-192819	Distal mGene mQTLs
cg22338845	chr11	123558835	123558834	rs61129032:123424045:T:TTAACTAATATGTAGAAGGAGACC	123553337	123553337	0	1.24395e-09	-0.184088	0.0284093	TRUE	-194909	Distal mGene mQTLs
cg10227124	chr11	123559130	123559129	rs2003795:123428835:T:G	123558127	123558127	0	9.27011e-17	-0.41903	0.0446304	FALSE	-199699	Distal mGene mQTLs
cg08847885	chr11	130069965	130069964	rs7926547:129938922:C:G	130069027	130069027	0	6.77842e-12	0.27516	0.036925	FALSE	810	Promoter mGene mQTLs
cg07296705	chr11	131392689	131392688	rs10791140:131242104:C:T	131372209	131372209	0	6.57409e-10	0.158566	0.0240163	FALSE	-1731	Promoter mGene mQTLs
cg26918812	chr11	131910989	131910988	rs12287321:131736568:C:T	131866674	131866674	0	8.606e-08	0.158196	0.0280971	FALSE	-496196	Distal mGene mQTLs
cg19856127	chr11	131894664	131894663	rs666850:131764550:T:C	131894656	131894656	0	2.83329e-12	-0.263619	0.0346464	TRUE	-524178	Distal mGene mQTLs
cg07579732	chr12	774175	774174	rs12826381:885743:C:T	776577	776577	0	1.71812e-07	-0.178953	0.0326277	FALSE	-23984	Distal mGene mQTLs
cg04979811	chr12	1605753	1605752	rs7308793	1601943	1601943	0	9.21584e-07	-0.124061	0.024228	FALSE	-72052	Distal non-mGene mQTLs
cg09709522	chr12	1790805	1790804	rs10773989:1856982:T:C	1747816	1747816	0	7.51375e-12	-0.157984	0.0212538	FALSE	-59242	Distal non-mGene mQTLs
cg23590207	chr12	1770279	1770278	rs12828908:1879385:A:G	1770219	1770219	0	3.76516e-16	0.267711	0.0292461	TRUE	-81645	Distal mGene mQTLs
cg05227549	chr12	1661617	1661616	rs7980272:1906208:C:T	1797042	1797042	0	5.97815e-09	0.347336	0.0562696	FALSE	-108468	Distal non-mGene mQTLs
cg21224286	chr12	1800751	1800750	rs6489330:1907853:A:G	1798687	1798687	0	2.31078e-17	0.318997	0.0331577	FALSE	120149	Distal mGene mQTLs
cg12859507	chr12	1800798	1800797	rs6489330:1907853:A:G	1798687	1798687	0	8.01476e-21	0.557174	0.0509738	FALSE	120149	Distal mGene mQTLs
cg08762603	chr12	1922252	1922251	rs2079610:2031393:C:T	1922227	1922227	0	2.39775e-13	0.47948	0.0595893	TRUE	-4276	Distal non-mGene mQTLs
cg02683869	chr12	3061550	3061549	rs10744590	3061514	3061514	0	9.486e-13	-0.224682	0.028791	TRUE	10631	Distal non-mGene mQTLs
cg16405575	chr12	3077008	3077007	rs6489429:3187912:G:C	3078746	3078746	0	5.14752e-12	-0.0766107	0.0102127	FALSE	-1391	Promoter mGene mQTLs
cg24409870	chr12	3081315	3081314	rs10848785:3190548:C:G	3081382	3081382	0	3.01125e-07	-0.120939	0.0225432	FALSE	-4027	Distal mGene mQTLs
cg02815776	chr12	3201001	3201000	rs880159	3105399	3105399	0	1.76974e-08	0.188503	0.0316523	FALSE	-28044	Distal mGene mQTLs
cg26107333	chr12	3201104	3201103	rs880159	3105399	3105399	0	3.93952e-10	0.174039	0.0259758	FALSE	-28044	Distal mGene mQTLs
cg10039504	chr12	3133107	3133106	rs7975449	3133513	3133513	0	6.62569e-13	-0.199659	0.0253778	FALSE	-56158	Distal mGene mQTLs
cg07911084	chr12	3231241	3231240	rs11062548:3284246:A:C	3175080	3175080	0	2.49932e-07	0.140142	0.0259292	FALSE	-97725	Distal mGene mQTLs
cg06726818	chr12	2927733	2927732	rs118175286:3291921:C:A	3182755	3182755	0	2.6319e-07	0.817415	0.15155	TRUE	-110610	Distal non-mGene mQTLs
cg16924822	chr12	3200099	3200098	rs4765720:3308296:C:G	3199130	3199130	0	1.02394e-07	-0.195024	0.0348634	FALSE	-121775	Distal mGene mQTLs
cg17266287	chr12	3259481	3259480	rs645722	3247068	3247068	0	2.79752e-27	1.70722	0.127914	TRUE	-169713	Distal mGene mQTLs
cg21225563	chr12	6536406	6536405	rs2886093:6645565:T:C	6536399	6536399	0	2.89277e-18	0.252241	0.0253127	FALSE	-2472	Promoter mGene mQTLs
cg26751275	chr12	6923914	6923913	rs5441:6949026:A:G	6839862	6839862	0	8.42904e-07	0.0909591	0.0176953	TRUE	92	Distal non-mGene mQTLs
cg12119858	chr12	6914032	6914031	rs2071419:7026932:T:C	6917768	6917768	0	2.35949e-07	-0.124119	0.0229123	TRUE	-44199	Distal mGene mQTLs
cg27442505	chr12	7873726	7873725	rs12818249:8173111:C:T	8020515	8020515	0	2.99326e-08	0.182509	0.0312059	TRUE	-1508	Distal non-mGene mQTLs
cg00347893	chr12	8032165	8032164	12:8173629:C:CT	8021033	8021033	0	3.10441e-07	0.104844	0.019567	TRUE	11670	Distal mGene mQTLs
cg05075065	chr12	8033271	8033270	rs12825574:8174402:C:T	8021806	8021806	0	3.82711e-11	-0.200403	0.0280834	TRUE	10897	Distal mGene mQTLs
cg16417563	chr12	10212966	10212965	rs2302486:10365574:C:G	10212975	10212975	0	1.42608e-12	0.16099	0.0208227	FALSE	-517	Promoter mGene mQTLs
cg05587756	chr12	10722136	10722135	rs35718202:10857240:CT:C	10704641	10704642	0	1.19355e-09	0.12554	0.0193501	TRUE	18671	Distal non-mGene mQTLs
cg03985116	chr12	10710391	10710390	rs12317203:10876059:G:T	10723460	10723460	0	9.93205e-14	0.225868	0.0275435	FALSE	-148	Promoter mGene mQTLs
cg22134853	chr12	10723484	10723483	rs11053915:10876805:G:C	10724206	10724206	0	1.94217e-09	0.0914583	0.0143049	FALSE	-894	Promoter mGene mQTLs
cg13108328	chr12	19129328	19129327	rs10505836	19135574	19135574	0	5.62535e-15	-0.303964	0.034957	FALSE	-5822	Distal mGene mQTLs
cg10519127	chr12	19197773	19197772	rs16915108:19290406:T:C	19137472	19137472	0	3.27503e-29	-0.965905	0.0686316	FALSE	-7720	Distal mGene mQTLs
cg04061752	chr12	19197157	19197156	rs10770439:19318371:A:G	19165437	19165437	0	3.07973e-15	-0.322583	0.0366652	TRUE	-35685	Distal mGene mQTLs
cg25670473	chr12	26018771	26018770	rs10842674:26246239:G:A	26093306	26093306	0	5.43158e-07	-0.163604	0.0312408	FALSE	-134277	Distal mGene mQTLs
cg17865872	chr12	32398977	32398976	rs57206817:32546728:CA:C	32393794	32393795	0	6.27406e-13	0.176376	0.0223909	TRUE	2353	Distal non-mGene mQTLs
cg10737105	chr12	32402269	32402268	rs2651370:32558025:A:G	32405091	32405091	0	6.04551e-08	0.196832	0.0345085	TRUE	-298256	Distal non-mGene mQTLs
cg17069347	chr12	32400322	32400321	rs79727589:32561436:C:G	32408502	32408502	0	8.29665e-13	0.230923	0.029501	FALSE	-301667	Distal non-mGene mQTLs
cg20470583	chr12	32485897	32485896	rs57441457:32615502:A:AT	32462568	32462568	0	7.32769e-07	-0.12704	0.0245669	TRUE	-63039	Distal mGene mQTLs
cg21996105	chr12	32478953	32478952	rs7309975:32623004:T:C	32470070	32470070	0	5.65303e-07	0.161038	0.0308021	TRUE	-363235	Distal non-mGene mQTLs
cg23977519	chr12	32675065	32675064	rs10844243:32713135:T:C	32560201	32560201	0	1.13353e-06	0.201346	0.0396777	TRUE	-453366	Distal non-mGene mQTLs
cg01995146	chr12	46550649	46550648	rs117983724:46762356:T:C	46368573	46368573	0	1.1873e-16	-1.31437	0.140612	TRUE	2890	Distal non-mGene mQTLs
cg23829395	chr12	46403171	46403170	rs4768118:46784744:T:C	46390961	46390961	0	6.86886e-11	0.135307	0.019253	FALSE	-2105	Distal non-mGene mQTLs
cg14793287	chr12	48184791	48184790	rs10875763:48580859:G:A	48187076	48187076	0	7.66583e-09	0.127031	0.0207455	FALSE	2273	Distal non-mGene mQTLs
cg09076022	chr12	48204681	48204680	rs10875763:48580859:G:A	48187076	48187076	0	8.61433e-09	0.163643	0.0268265	FALSE	2273	Distal non-mGene mQTLs
cg00985115	chr12	48199036	48199035	rs10875765:48583632:T:C	48189849	48189849	0	4.17048e-08	0.202732	0.0350714	FALSE	-500	Distal non-mGene mQTLs
cg09941176	chr12	49828826	49828825	rs190099672:49587553:C:T	49193770	49193770	0	1.02945e-07	0.223827	0.0400204	TRUE	-5034	Distal non-mGene mQTLs
cg20987850	chr12	49215396	49215395	rs35273099:49609515:TA:T	49215732	49215733	0	3.34348e-08	-0.283299	0.0486272	TRUE	-26996	Distal non-mGene mQTLs
cg13116138	chr12	51188856	51188855	rs7306522:51570062:G:T	51176279	51176279	0	8.16616e-14	-0.373835	0.0453989	TRUE	41429	Distal mGene mQTLs
cg03249590	chr12	56646416	56646415	rs7956952:57031090:G:C	56637306	56637306	0	2.94409e-08	0.617836	0.105578	TRUE	-490	Distal non-mGene mQTLs
cg21721432	chr12	57079002	57079001	rs73116494:57459209:C:T	57065426	57065426	0	1.27908e-08	0.161199	0.0267733	FALSE	22637	Distal non-mGene mQTLs
cg00677455	chr12	57847257	57847256	rs11172362:58244756:T:A	57850973	57850973	0	8.32622e-26	0.252152	0.019708	FALSE	-4234	Distal mGene mQTLs
cg02408103	chr12	57847431	57847430	rs11172362:58244756:T:A	57850973	57850973	0	7.52959e-11	0.140514	0.0200425	FALSE	-4234	Distal mGene mQTLs
cg05379312	chr12	89615153	89615152	rs11105354:90026523:A:G	89632746	89632746	0	2.09472e-10	-0.171609	0.0251645	FALSE	76554	Distal mGene mQTLs
cg17140262	chr12	95225016	95225015	rs11309269:95619874:TA:T	95226098	95226099	0	1.92469e-13	0.203671	0.0251915	TRUE	-8352	Distal mGene mQTLs
cg19586024	chr12	109742829	109742828	rs735465:110136274:C:G	109698469	109698469	0	6.41755e-07	-0.122521	0.0235602	TRUE	15759	Distal mGene mQTLs
cg07382437	chr12	109760350	109760349	rs735465:110136274:C:G	109698469	109698469	0	2.10495e-09	-0.174008	0.0272834	TRUE	15759	Distal non-mGene mQTLs
cg18593915	chr12	109714782	109714781	rs825002:110147526:C:G	109709721	109709721	0	1.10332e-18	0.208918	0.020636	FALSE	4507	Distal non-mGene mQTLs
cg25900312	chr12	109766431	109766430	rs824999:110152606:G:C	109714801	109714801	0	1.62136e-07	-0.141199	0.0256864	FALSE	58707	Distal mGene mQTLs
cg17711345	chr12	110029257	110029256	rs112276518:110196747:G:A	109758942	109758942	0	4.39278e-18	-2.16096	0.218367	TRUE	-44714	Distal non-mGene mQTLs
cg05788368	chr12	110068334	110068333	rs73191838:110967544:A:G	110529739	110529739	1	1.5178e-07	-1.19383	0.216627	FALSE	-28084	Distal non-mGene mQTLs
cg11972180	chr12	111842962	111842961	rs112039348:112551370:A:AAGG	112113566	112113566	0	2.1914e-28	0.312221	0.0226865	TRUE	-4544	Distal non-mGene mQTLs
cg10205974	chr12	116027658	116027657	rs11067918:116569379:T:C	116131574	116131574	0	3.86942e-15	0.372913	0.0425739	FALSE	145764	Distal mGene mQTLs
cg17153306	chr12	115953468	115953467	rs56317424:116621614:T:G	116183809	116183809	0	2.40362e-07	-0.250629	0.0463	TRUE	-35155	Distal non-mGene mQTLs
cg27295716	chr12	118104265	118104264	rs34888508:118640616:G:A	118202811	118202811	0	1.26711e-08	0.174317	0.028943	FALSE	170134	Distal non-mGene mQTLs
cg02628790	chr12	118161189	118161188	rs1699160:118756336:C:A	118318531	118318531	0	3.67614e-09	-0.186195	0.0297024	FALSE	54414	Distal mGene mQTLs
cg27106959	chr12	119037047	119037046	rs10775010:119425898:T:C	118988093	118988093	0	6.0872e-07	0.117459	0.0225365	FALSE	-6598	Distal mGene mQTLs
cg23881566	chr12	119019342	119019341	rs74808345:119481393:CA:C	119043588	119043589	0	1.30297e-07	-0.154898	0.0279436	FALSE	-62093	Distal mGene mQTLs
cg16126580	chr12	119667910	119667909	rs2393550	119660203	119660203	0	3.20542e-18	0.324194	0.0325886	TRUE	7550	Distal mGene mQTLs
cg06049002	chr12	120115953	120115952	rs113566038:120543715:C:T	120105911	120105911	0	2.10787e-32	0.943625	0.0617222	TRUE	11591	Distal mGene mQTLs
cg11826475	chr12	120266204	120266203	rs147625061:120674929:C:CGT	120237126	120237126	0	1.05313e-07	-0.10266	0.0183714	TRUE	28645	Distal mGene mQTLs
cg15569123	chr12	120254305	120254304	rs56102477:120685493:C:T	120247690	120247690	0	1.21786e-07	0.302312	0.0543972	FALSE	18081	Distal mGene mQTLs
cg17644227	chr12	120377681	120377680	rs76019166:120690511:C:G	120252708	120252708	0	6.71985e-07	0.235935	0.0454574	FALSE	-27964	Distal non-mGene mQTLs
cg17403084	chr12	120266232	120266231	rs112863429:120703715:G:C	120265912	120265912	0	1.1837e-11	-0.170483	0.0231925	FALSE	-141	Promoter mGene mQTLs
cg02239282	chr12	120328347	120328346	rs1179450:120801856:T:C	120364053	120364053	0	8.11791e-08	-0.11578	0.0205192	TRUE	5127	Distal non-mGene mQTLs
cg26872792	chr12	120326013	120326012	rs2283367:120802968:C:A	120365165	120365165	0	3.01438e-23	0.607477	0.0513151	FALSE	4015	Distal non-mGene mQTLs
cg01341572	chr12	120978710	120978709	rs1151842:120836085:G:A	120398282	120398282	0	6.44772e-07	0.269707	0.0518735	TRUE	-29102	Distal non-mGene mQTLs
cg26392922	chr12	121794915	121794914	rs712852:122233495:G:C	121795589	121795589	0	4.03698e-18	-0.395681	0.0399277	FALSE	7814	Distal mGene mQTLs
cg03141007	chr12	121812613	121812612	rs1168663:122234089:T:A	121796183	121796183	0	1.95205e-08	0.141267	0.0238001	FALSE	7997	Distal mGene mQTLs
cg25930673	chr12	122835348	122835347	rs5801491:123343572:G:GGC	122859025	122859025	0	5.46721e-08	-0.315248	0.0550683	TRUE	-24572	Distal mGene mQTLs
cg14409041	chr12	122980058	122980057	rs11608811:123529056:A:G	123044509	123044509	0	4.45623e-12	-0.468154	0.0621924	FALSE	36875	Distal non-mGene mQTLs
cg21745287	chr12	122979965	122979964	rs59131741:123536456:C:CT	123051909	123051909	0	2.05388e-20	-0.282844	0.026245	TRUE	29475	Distal non-mGene mQTLs
cg16697799	chr12	122980109	122980108	rs59131741:123536456:C:CT	123051909	123051909	0	6.45733e-12	-0.202755	0.0271766	TRUE	29475	Distal non-mGene mQTLs
cg01492050	chr12	122976084	122976083	rs146637945:123598258:A:AC	123113711	123113711	0	3.97038e-12	-0.242492	0.0321255	TRUE	-32327	Distal non-mGene mQTLs
cg01030110	chr12	123043881	123043880	rs7975763:123604053:C:T	123119506	123119506	0	1.05947e-13	0.180299	0.0220168	FALSE	30509	Distal mGene mQTLs
cg05968312	chr12	123437311	123437310	rs1790122:123606739:G:A	123122192	123122192	0	7.6679e-09	0.145878	0.0238236	FALSE	-40808	Distal non-mGene mQTLs
cg22341471	chr12	122966777	122966776	rs1615350:123650335:C:T	123165788	123165788	0	3.97072e-10	0.0969582	0.0144745	FALSE	-84404	Distal non-mGene mQTLs
cg00376283	chr12	122966496	122966495	rs143989762:123653256:CCCT:C	123168709	123168712	0	5.69737e-19	0.30092	0.0294075	FALSE	-87325	Distal non-mGene mQTLs
cg14951136	chr12	124389462	124389461	rs1109270:124857293:G:A	124372747	124372747	0	1.73644e-07	0.632378	0.115346	TRUE	194842	Distal mGene mQTLs
cg04052996	chr12	124389133	124389132	rs1244050:124862697:G:A	124378151	124378151	0	8.20687e-07	0.598565	0.116312	FALSE	189438	Distal mGene mQTLs
cg09644157	chr12	124411667	124411666	rs4394929:124923177:C:T	124438631	124438631	0	1.55303e-08	0.143832	0.024045	FALSE	128958	Distal mGene mQTLs
cg27505193	chr12	124461832	124461831	rs1794978:124928446:C:T	124443900	124443900	0	6.35125e-07	0.244401	0.0469764	FALSE	123689	Distal mGene mQTLs
cg00292004	chr12	124445915	124445914	rs112074468:124936117:T:TTCTG	124451571	124451571	0	3.43714e-10	0.230589	0.0342836	TRUE	116018	Distal mGene mQTLs
cg08034663	chr12	124408966	124408965	rs1147286:124948235:G:A	124463689	124463689	0	2.76286e-07	0.191054	0.0354902	FALSE	103900	Distal mGene mQTLs
cg15199476	chr12	124408980	124408979	rs1147286:124948235:G:A	124463689	124463689	0	8.3661e-08	0.178887	0.0317387	TRUE	103900	Distal mGene mQTLs
cg06881647	chr12	124409011	124409010	rs1147286:124948235:G:A	124463689	124463689	0	1.20574e-07	0.191094	0.0343719	FALSE	103900	Distal mGene mQTLs
cg06204938	chr12	124521165	124521164	rs12822442:125005712:C:G	124521166	124521166	0	4.63796e-13	-0.21502	0.0271133	FALSE	46423	Distal mGene mQTLs
cg17543324	chr12	124545687	124545686	rs837480	124545246	124545246	0	1.57937e-07	-0.142149	0.0258332	FALSE	22343	Distal mGene mQTLs
cg16757384	chr12	124545605	124545604	rs11057666:125030170:A:G	124545624	124545624	0	3.15008e-09	0.161444	0.0256301	FALSE	-162243	Distal non-mGene mQTLs
cg00522213	chr12	124833994	124833993	rs4765621	124836169	124836169	0	8.1601e-18	-0.204547	0.0208861	FALSE	46499	Distal mGene mQTLs
cg06300469	chr12	124898593	124898592	rs11057888:125383129:C:A	124898583	124898583	0	2.03137e-40	0.658857	0.0357113	FALSE	2929	Distal non-mGene mQTLs
cg01310881	chr12	124898969	124898968	rs11057890:125383522:C:T	124898976	124898976	0	5.62767e-14	-0.140775	0.0169627	FALSE	2536	Distal non-mGene mQTLs
cg22793817	chr12	124904635	124904634	rs7304293	124904726	124904726	0	4.1186e-09	-0.182392	0.0291998	FALSE	-3214	Distal non-mGene mQTLs
cg02155927	chr12	124927954	124927953	rs11057911:125411587:T:C	124927041	124927041	0	5.74977e-28	0.357815	0.0263008	FALSE	-25529	Distal non-mGene mQTLs
cg19893132	chr12	124940664	124940663	rs61179054:125425192:T:C	124940646	124940646	0	4.64147e-26	-0.467617	0.0362793	FALSE	-39134	Distal non-mGene mQTLs
cg21673010	chr12	124940973	124940972	rs61179054:125425192:T:C	124940646	124940646	0	3.33772e-13	-0.253174	0.0316929	FALSE	-39134	Distal non-mGene mQTLs
cg24410690	chr12	128814937	128814936	rs11059928:129296103:A:T	128811558	128811558	0	3.90559e-08	-0.321198	0.0554359	FALSE	12425	Distal mGene mQTLs
cg16316183	chr12	128814921	128814920	rs113882544:129297737:T:C	128813192	128813192	0	2.583e-08	-0.372258	0.0633238	TRUE	10791	Distal mGene mQTLs
cg23521905	chr12	128814146	128814145	rs4760537:129301299:C:A	128816754	128816754	0	1.89226e-13	0.266312	0.0329272	FALSE	7229	Distal mGene mQTLs
cg05253716	chr12	128814788	128814787	rs4760537:129301299:C:A	128816754	128816754	0	5.59552e-08	0.181702	0.0317667	FALSE	7229	Distal mGene mQTLs
cg13074908	chr12	130641305	130641304	rs11061051:131129365:A:G	130644820	130644820	0	1.07497e-12	0.219897	0.0282581	FALSE	6551	Distal non-mGene mQTLs
cg10958265	chr12	130662067	130662066	rs9795534:131149763:C:G	130665218	130665218	0	7.73495e-14	-0.200773	0.0243541	FALSE	-13847	Distal non-mGene mQTLs
cg15942717	chr12	130669264	130669263	rs60876022:131152746:T:A	130668201	130668201	0	2.88987e-15	0.65825	0.0747256	FALSE	-16830	Distal non-mGene mQTLs
cg05181941	chr12	130686487	130686486	rs4759754:131179602:C:T	130695057	130695057	0	9.09767e-15	0.319592	0.0371052	FALSE	-43686	Distal non-mGene mQTLs
cg05375686	chr12	130686637	130686636	rs11309202:131187060:CA:C	130702515	130702516	0	2.49302e-09	-0.181365	0.0285848	FALSE	-51144	Distal non-mGene mQTLs
cg15732107	chr12	130686986	130686985	rs7963888:131189685:C:T	130705140	130705140	0	1.53702e-09	0.300723	0.0467041	FALSE	-53769	Distal non-mGene mQTLs
cg00514489	chr12	130706312	130706311	rs7295428:131197817:A:C	130713272	130713272	0	7.62886e-08	-0.161827	0.0286142	TRUE	-61901	Distal non-mGene mQTLs
cg09150807	chr12	131084220	131084219	rs113748144:131582714:C:T	131098169	131098169	0	3.47286e-08	-0.140173	0.0240924	TRUE	-144262	Distal non-mGene mQTLs
cg06581300	chr12	131121926	131121925	rs1725788:131608476:A:G	131123931	131123931	0	8.62458e-08	0.230892	0.0410119	FALSE	-170024	Distal mGene mQTLs
cg13899096	chr12	131120676	131120675	rs1725789	131124981	131124981	0	9.18113e-15	0.309061	0.035889	FALSE	-171074	Distal mGene mQTLs
cg22663463	chr12	131121786	131121785	rs1725789	131124981	131124981	0	2.3579e-15	0.490015	0.0554097	FALSE	-171074	Distal mGene mQTLs
cg03153539	chr12	131124081	131124080	rs1725789	131124981	131124981	0	7.93078e-25	0.585476	0.0471079	FALSE	-171074	Distal mGene mQTLs
cg06374807	chr12	131122313	131122312	rs1725789	131124981	131124981	0	1.43737e-08	0.378431	0.0630992	TRUE	-171074	Distal non-mGene mQTLs
cg21344159	chr12	131124772	131124771	rs1725789	131124981	131124981	0	2.61456e-12	0.452719	0.0593867	FALSE	-171074	Distal non-mGene mQTLs
cg17405139	chr12	131116543	131116542	rs28972274:131612225:A:G	131127680	131127680	0	7.72183e-08	-0.170826	0.0302188	TRUE	-173773	Distal non-mGene mQTLs
cg23903129	chr12	131132542	131132541	rs112643563:131617074:C:CG	131132529	131132529	0	1.63173e-12	0.218485	0.0283472	FALSE	-178622	Distal non-mGene mQTLs
cg26922917	chr12	131138040	131138039	rs884943:131622506:T:C	131137961	131137961	0	3.92866e-11	-0.234015	0.0328158	FALSE	-184054	Distal non-mGene mQTLs
cg01056242	chr12	131138195	131138194	rs884943:131622506:T:C	131137961	131137961	0	4.05186e-10	-0.233863	0.0349326	FALSE	-184054	Distal non-mGene mQTLs
cg15010296	chr12	131900654	131900653	rs4964882:132381696:C:T	131897151	131897151	0	6.25005e-22	-0.640527	0.0564547	FALSE	-2500	Promoter mGene mQTLs
cg21523613	chr12	131892880	131892879	rs4964923:132388500:C:T	131903955	131903955	0	5.93786e-12	0.175314	0.023451	FALSE	-9304	Distal non-mGene mQTLs
cg15844201	chr12	132456425	132456424	rs60815663:133031511:C:A	132454925	132454925	0	5.30957e-10	-0.18362	0.0276401	FALSE	2235	Distal non-mGene mQTLs
cg27523351	chr12	132456684	132456683	exm-rs10747083	132465032	132465032	0	6.51715e-10	0.129375	0.0195901	FALSE	-7872	Distal non-mGene mQTLs
cg01843264	chr12	132459431	132459430	rs11147102:133046199:G:A	132469613	132469613	0	3.21116e-08	0.36899	0.0632461	TRUE	-12453	Distal non-mGene mQTLs
cg18143359	chr12	132466979	132466978	rs11147102:133046199:G:A	132469613	132469613	0	4.8046e-08	0.142638	0.0248006	FALSE	-12453	Distal non-mGene mQTLs
cg24846573	chr12	132489221	132489220	rs7306524:133052932:G:A	132476346	132476346	0	2.37569e-07	0.0928022	0.0171359	FALSE	13205	Distal mGene mQTLs
cg07099606	chr12	132474551	132474550	rs4883583:133056570:T:C	132479984	132479984	0	5.18119e-27	-0.638354	0.0481917	FALSE	-22824	Distal non-mGene mQTLs
cg18946787	chr12	132475636	132475635	rs4883583:133056570:T:C	132479984	132479984	0	3.25116e-22	-0.491581	0.0429251	FALSE	-22824	Distal non-mGene mQTLs
cg18617770	chr12	132459354	132459353	rs145877125:133060309:C:T	132483723	132483723	0	3.77464e-11	0.893825	0.125211	FALSE	-26563	Distal non-mGene mQTLs
cg12522758	chr12	132661103	132661102	rs141970815:133066123:G:C	132489537	132489537	0	1.35048e-07	-0.202142	0.0365162	TRUE	14	Distal non-mGene mQTLs
cg11084474	chr12	132431090	132431089	rs11147230:133072460:G:C	132495874	132495874	1	3.65534e-07	-0.624767	0.117372	TRUE	-38714	Distal non-mGene mQTLs
cg07116732	chr12	132547357	132547356	rs7398953:133101355:C:T	132524769	132524769	0	1.46796e-07	-0.176557	0.0319962	FALSE	-35218	Distal mGene mQTLs
cg19100996	chr12	132562001	132562000	rs4883521:133114840:G:A	132538254	132538254	0	1.04638e-07	-0.111988	0.0200358	TRUE	-48703	Distal mGene mQTLs
cg10468107	chr12	132542042	132542041	rs12372596:133125137:C:G	132548551	132548551	0	1.27334e-10	0.183648	0.0265661	FALSE	-59000	Distal mGene mQTLs
cg23460285	chr12	132500102	132500101	rs59196714:133133141:ACCC:A	132556555	132556558	0	3.27957e-09	0.153885	0.0244607	TRUE	-67004	Distal mGene mQTLs
cg05053403	chr12	132544091	132544090	rs7973990:133137480:G:C	132560894	132560894	0	5.77306e-08	-0.282925	0.0495194	FALSE	-71343	Distal mGene mQTLs
cg03538318	chr12	132835219	132835218	rs55706161:133382637:G:A	132806051	132806051	0	1.12029e-14	0.425642	0.0496233	FALSE	16077	Distal non-mGene mQTLs
cg12581980	chr12	132806071	132806070	rs61952772:133398342:G:A	132821756	132821756	0	6.77817e-07	0.242524	0.0467439	TRUE	7102	Distal mGene mQTLs
cg14949892	chr12	132851724	132851723	rs74721187:133398421:A:C	132821835	132821835	0	2.5042e-10	0.341644	0.0503468	TRUE	134469	Distal mGene mQTLs
cg07776804	chr12	132828905	132828904	rs7298097:133398451:A:C	132821865	132821865	0	1.18492e-13	0.157612	0.0192924	TRUE	6993	Distal mGene mQTLs
cg16300310	chr12	132804919	132804918	rs957800	132826956	132826956	0	9.81031e-09	0.267124	0.0439777	FALSE	1902	Promoter mGene mQTLs
cg06119275	chr12	132808151	132808150	rs10781656:133407523:A:G	132830937	132830937	0	5.76795e-07	-0.231509	0.0443187	FALSE	-2079	Promoter mGene mQTLs
cg07052262	chr12	132822403	132822402	rs10781656:133407523:A:G	132830937	132830937	0	2.11055e-19	-0.45465	0.0437338	FALSE	-2079	Promoter mGene mQTLs
cg16214937	chr12	132822568	132822567	rs10781656:133407523:A:G	132830937	132830937	0	1.20811e-12	-0.336556	0.0433653	FALSE	-2079	Promoter mGene mQTLs
cg05237360	chr12	132784119	132784118	rs146419925:133407649:C:CA	132831063	132831063	0	1.03865e-06	0.164489	0.0322907	TRUE	-2205	Promoter mGene mQTLs
[truncated: 1,820 more rows]
