# Supplementary material for: QTL mapping of human retina DNA methylation identifies 87 gene-epigenome interactions in age-related macular degeneration
Source: Nat Commun. 2024 Mar 4;15:1972. doi: 10.1038/s41467-024-46063-8 (PMC10912779; doi:10.1038/s41467-024-46063-8)
Supplement: Supplementary file 34 — Supplementary Data 31 [file 41467_2024_46063_MOESM34_ESM.xlsx]

## Sheet: CRE
Gene_ID	Gene_Symbol	chr	Gene_start	Gene_end	snp	hg38_pos_start	hg38_pos_end	Rank	Backward_nom_pval	Backward_slope	Backward_slope_se	TSS-variant_Distance	Type
ENSG00000223764	RP11-54O7.3	chr1	916866	921016	rs56367715:868928:A:AG	933548	933548	0	1.14e-10	1.19045	0.179763	-9620	Distal non-eGene eQTLs
ENSG00000127054	CPSF3L	chr1	1311586	1324691	rs115464315:1242288:T:G	1306908	1306908	0	7.17e-08	5.47775	0.997907	1659	Promoter non-eGene eQTLs
ENSG00000242485	MRPL20	chr1	1401909	1407313	rs34442823:1342945:C:A	1407565	1407565	0	5.83e-14	1.87588	0.240835	-252	Promoter-eGene eQTLs
ENSG00000235098	ANKRD65	chr1	1418421	1421769	exm3350	1419135	1419135	0	7.85e-21	-0.954287	0.0963532	2634	Distal eGene eQTLs
ENSG00000158109	TPRG1L	chr1	3625003	3630127	rs12757620	3623460	3623460	0	1.24e-23	-0.670252	0.0627051	1542	Promoter-eGene eQTLs
ENSG00000158109	TPRG1L	chr1	3625003	3630127	exm7253	3632268	3632268	1	1.68e-23	-1.42694	0.133946	-7266	Distal eGene eQTLs
ENSG00000069424	KCNAB2	chr1	5991467	6101193	rs71568636:6051981:CCAGGGGG:C	5991921	5991928	1	1.78e-06	0.337718	0.0696555	-455	Promoter-eGene eQTLs
ENSG00000116237	ICMT	chr1	6221194	6235972	rs6680884:6268371:G:A	6208311	6208311	0	4.68e-09	-1.22235	0.204076	1078	Promoter non-eGene eQTLs
ENSG00000158292	GPR153	chr1	6247347	6260975	rs61760840:6320649:G:C	6260589	6260589	0	4.52e-06	0.648503	0.139473	386	Promoter-eGene eQTLs
ENSG00000069812	HES2	chr1	6412419	6424670	rs58125749:6453744:C:A	6393684	6393684	0	5.04e-09	0.80442	0.134594	-129	Promoter non-eGene eQTLs
ENSG00000187017	ESPN	chr1	6424789	6461370	rs72633460:6474364:G:A	6414304	6414304	0	5.2e-11	-16.1953	2.39931	10366	Distal non-eGene eQTLs
ENSG00000270171	RP11-338N10.1	chr1	7693125	7694844	rs77721345:7748009:C:T	7687949	7687949	1	1.8e-09	0.886288	0.143948	-902625	Distal non-eGene eQTLs
ENSG00000270035	RP11-338N10.2	chr1	7698304	7698872	rs17368220:7755729:T:C	7695669	7695669	1	3.84e-05	-0.408956	0.098226	-825	Promoter non-eGene eQTLs
ENSG00000269978	RP11-338N10.3	chr1	7700705	7700970	rs4908680:7757998:T:G	7697938	7697938	0	1.9e-09	1.21568	0.19774	934	Promoter non-eGene eQTLs
ENSG00000270171	RP11-338N10.1	chr1	7693125	7694844	rs1539181:7761640:T:C	7701580	7701580	0	9.79e-43	0.883639	0.0570591	-610	Promoter non-eGene eQTLs
ENSG00000270035	RP11-338N10.2	chr1	7698304	7698872	rs34600274:7762140:CAGG:C	7702080	7702083	0	5.13e-15	-0.825038	0.101389	-1110	Promoter non-eGene eQTLs
ENSG00000049245	VAMP3	chr1	7771270	7781432	1:7843711:T:C	7783651	7783651	0	1.31e-17	2.42847	0.271261	669	Promoter non-eGene eQTLs
ENSG00000049239	H6PD	chr1	9234776	9271337	rs9435144:9295444:T:C	9235385	9235385	0	2.86e-30	-3.66911	0.294944	-610	Promoter-eGene eQTLs
ENSG00000171621	SPSB1	chr1	9292881	9369532	rs76884273:9852271:C:A	9792213	9792213	0	1.86e-10	5.52	0.843877	32313	Distal non-eGene eQTLs
ENSG00000171603	CLSTN1	chr1	9729027	9824526	rs11121497:9902820:A:G	9842762	9842762	0	1.94e-13	-28.4353	3.73536	5556	Distal non-eGene eQTLs
ENSG00000142655	PEX14	chr1	10472289	10630758	rs2506896:10603716:T:C	10543659	10543659	0	2.84e-33	5.51712	0.418085	-71371	Distal eGene eQTLs
ENSG00000162461	SLC25A34	chr1	15736406	15741396	rs1108185:16064144:A:G	15737649	15737649	0	9.16e-38	-1.09857	0.0768365	-1244	Promoter-eGene eQTLs
ENSG00000186301	MST1P2	chr1	16645623	16650289	rs10492988:16826296:C:G	16499801	16499801	0	1.17e-08	0.37774	0.0648391	-544	Promoter non-eGene eQTLs
ENSG00000268869	ESPNP	chr1	16687340	16720157	rs2991726:16861562:A:C	16535067	16535067	1	3.98e-06	0.412142	0.0881112	1105	Promoter non-eGene eQTLs
ENSG00000215908	CROCCP2	chr1	16618970	16644683	rs11584240:17231692:G:A	16905197	16905197	0	2.8e-12	0.586286	0.081309	-421	Promoter non-eGene eQTLs
ENSG00000219481	NBPF1	chr1	16562320	16613562	rs11588350:17231788:C:T	16905293	16905293	0	1.59e-14	-0.767377	0.0961995	-517	Promoter non-eGene eQTLs
ENSG00000142623	PADI1	chr1	17205127	17246005	rs2143810:17440854:C:A	17114359	17114359	1	3.05e-05	0.310992	0.0737302	5076	Distal non-eGene eQTLs
ENSG00000127463	EMC1	chr1	19215665	19251552	rs3748757:19491857:T:C	19165363	19165363	1	3.4e-08	-0.386041	0.0685755	44913	Distal non-eGene eQTLs
ENSG00000127463	EMC1	chr1	19215665	19251552	rs2073104:19564650:C:G	19238156	19238156	0	1.18e-09	-0.502533	0.0806592	13396	Distal eGene eQTLs
ENSG00000053372	MRTO4	chr1	19251540	19260128	rs61764885:19579994:C:T	19253500	19253500	0	2.49e-07	-0.703915	0.134124	-1961	Promoter-eGene eQTLs
ENSG00000053371	AKR7A2	chr1	19303966	19312146	rs2227295:19638309:A:G	19311815	19311815	0	5.69e-06	0.60993	0.132611	331	Promoter-eGene eQTLs
ENSG00000162545	CAMK2N1	chr1	20482392	20486220	rs12566008:20688550:T:C	20362057	20362057	0	6.94e-07	-0.423687	0.0840093	69177	Distal non-eGene eQTLs
ENSG00000162551	ALPL	chr1	21509373	21578412	rs1256344:21874042:C:G	21547549	21547549	0	1.11e-38	1.22114	0.0841096	-38177	Distal eGene eQTLs
ENSG00000090686	USP48	chr1	21678299	21783606	rs7519675:22106875:A:G	21780382	21780382	0	9.2e-11	4.57571	0.687337	3224	Distal eGene eQTLs
ENSG00000070886	EPHA8	chr1	22563565	22603594	rs682118:22910226:C:A	22583733	22583733	1	1.3e-06	0.662832	0.13487	-20169	Distal eGene eQTLs
ENSG00000185436	IFNLR1	chr1	24154158	24187959	rs12094257:24513608:C:T	24187118	24187118	0	4.15e-22	-0.721162	0.0702472	841	Promoter-eGene eQTLs
ENSG00000001460	STPG1	chr1	24357000	24416934	rs10708610:24765378:TA:T	24438888	24438889	0	2.07e-10	-0.427032	0.0654595	-23094	Distal non-eGene eQTLs
ENSG00000185436	IFNLR1	chr1	24154158	24187959	rs12064700:24878491:C:T	24552000	24552000	1	6.22e-06	-0.372896	0.0814184	4024	Distal non-eGene eQTLs
ENSG00000117640	MTFR1L	chr1	25818641	25832942	rs2294226:26146449:C:T	25819958	25819958	0	5.97e-50	-8.30908	0.483798	-1318	Promoter-eGene eQTLs
ENSG00000142675	CNKSR1	chr1	26177404	26189886	rs8768:26497340:A:C	26170849	26170849	0	2.73e-42	1.0405	0.0676497	-2268	Promoter non-eGene eQTLs
ENSG00000236155	RP11-231P20.2	chr1	26209742	26229840	rs11247878:26560962:C:T	26234471	26234471	0	8.7e-07	-0.245637	0.0491536	-318	Promoter non-eGene eQTLs
ENSG00000060642	PIGV	chr1	26787473	26798398	rs34397747:27092322:T:C	26765831	26765831	0	4.58e-11	-1.09159	0.16123	-72595	Distal non-eGene eQTLs
ENSG00000090273	NUDC	chr1	26900239	26946862	rs147947012:27340348:C:G	27013857	27013857	0	3.69e-10	-3.66707	0.570526	-1021	Promoter non-eGene eQTLs
ENSG00000130770	ATPIF1	chr1	28236110	28246906	rs489259:28547077:T:C	28220566	28220566	1	5.03e-08	-0.686946	0.123634	12459	Distal non-eGene eQTLs
ENSG00000130770	ATPIF1	chr1	28236110	28246906	rs6691903:28573642:A:G	28247131	28247131	0	1.39e-59	-1.07312	0.0553317	-11022	Distal eGene eQTLs
ENSG00000130772	MED18	chr1	28329003	28335967	rs145850575:29536018:CAG:C	29209506	29209508	0	4.14e-05	0.619412	0.149427	14427	Distal non-eGene eQTLs
ENSG00000134686	PHC2	chr1	33323624	33431052	rs77244502:33761211:C:CAG	33295610	33295610	0	1.51e-07	4.2985	0.803995	-39065	Distal non-eGene eQTLs
ENSG00000116525	TRIM62	chr1	33145403	33182059	rs368589779:33813967:T:C	33348366	33348366	0	1.18e-05	0.803112	0.181005	1986	Promoter non-eGene eQTLs
ENSG00000142687	KIAA0319L	chr1	35433491	35557950	1:36088525:A:C	35622924	35622924	0	1.32e-05	-6.036	1.36825	18920	Distal non-eGene eQTLs
ENSG00000092847	AGO1	chr1	35869809	35930528	rs72901297:36184589:C:T	35718988	35718988	0	1.25e-11	4.42552	0.634211	484	Promoter non-eGene eQTLs
ENSG00000054116	TRAPPC3	chr1	36136571	36156053	rs5773520:36633897:G:GA	36168296	36168296	1	2.07e-05	0.335304	0.0778282	-12717	Distal non-eGene eQTLs
ENSG00000181817	LSM10	chr1	36391239	36397892	rs79251590:36863697:T:C	36398096	36398096	0	3.16e-07	0.645771	0.124146	-204	Promoter-eGene eQTLs
ENSG00000134690	CDCA8	chr1	37692419	37709719	rs2306626:38156343:G:A	37690671	37690671	0	2.25e-11	-0.643473	0.0934688	1747	Promoter-eGene eQTLs
ENSG00000243970	PPIEL	chr1	39531839	39558707	rs17568616:39682662:A:T	39216990	39216990	0	1.58e-07	-0.366522	0.0686751	-135674	Distal non-eGene eQTLs
ENSG00000227533	SLC2A1-AS1	chr1	42959050	42983358	rs17387775	42950462	42950462	0	5.11e-49	1.16496	0.0686954	8587	Distal eGene eQTLs
ENSG00000178922	HYI	chr1	43451004	43453989	rs2782651:43920686:C:G	43455015	43455015	0	6.76e-26	-1.81011	0.160173	-1026	Promoter-eGene eQTLs
ENSG00000229444	RP11-184I16.4	chr1	43709393	43727343	rs76760124:44186396:A:G	43720725	43720725	1	2.87e-08	-0.829198	0.146475	6618	Distal eGene eQTLs
ENSG00000229444	RP11-184I16.4	chr1	43709393	43727343	rs12122504:44256819:C:G	43791148	43791148	0	5.4e-09	-0.407818	0.0683769	-85324	Distal non-eGene eQTLs
ENSG00000126091	ST3GAL3	chr1	43705825	43931165	rs3791058:44270310:T:C	43804639	43804639	0	8.53e-08	0.376761	0.0690499	-98815	Distal eGene eQTLs
ENSG00000117408	IPO13	chr1	43946940	43968022	rs150936757:44444138:C:G	43978466	43978466	0	1.26e-08	-5.64852	0.971854	477	Promoter non-eGene eQTLs
ENSG00000280670	CCDC163P	chr1	45493867	45500079	rs6688516:45985760:G:A	45520088	45520088	0	3.15e-132	-4.92445	0.13224	2959	Distal non-eGene eQTLs
ENSG00000132763	MMACHC	chr1	45500054	45513382	rs6688516:45985760:G:A	45520088	45520088	0	1.67e-13	-0.489365	0.0640947	2959	Distal non-eGene eQTLs
ENSG00000117461	PIK3R3	chr1	46040141	46133036	rs1416706:46602844:G:A	46137172	46137172	0	4.8e-43	-0.933713	0.0600093	-4136	Distal eGene eQTLs
ENSG00000085998	POMGNT1	chr1	46188683	46220305	rs28364741:46664249:A:G	46198577	46198577	0	9.19e-06	-1.8908	0.420802	21728	Distal eGene eQTLs
ENSG00000079277	MKNK1	chr1	46557409	46616843	rs56869893:47082513:T:C	46616841	46616841	0	6e-07	0.412908	0.0813938	2	Promoter-eGene eQTLs
ENSG00000116157	GPX7	chr1	52602373	52609051	rs11810754:53067914:T:G	52602242	52602242	0	3.25e-09	-0.202119	0.0333846	130	Promoter-eGene eQTLs
ENSG00000162383	SLC1A7	chr1	53087180	53142632	rs1769299:53585723:G:T	53120051	53120051	1	1.26e-08	-0.396604	0.0682344	22581	Distal eGene eQTLs
ENSG00000157184	CPT2	chr1	53196430	53214197	rs11578832:53674542:G:A	53208870	53208870	0	5.13e-08	-0.823894	0.148381	-12441	Distal eGene eQTLs
ENSG00000081870	HSPB11	chr1	53916575	53945929	rs1063162:54412181:T:C	53946508	53946508	0	8.3e-13	-0.704227	0.0952224	-579	Promoter-eGene eQTLs
ENSG00000215883	CYB5RL	chr1	54169652	54200036	rs140708162:54620197:G:A	54154524	54154524	0	3.56e-17	-3.73317	0.423282	-754	Promoter non-eGene eQTLs
ENSG00000116212	LRRC42	chr1	53946078	53968168	rs6704316:54757151:C:T	54291478	54291478	0	4.64e-05	0.816467	0.198269	-6073	Distal non-eGene eQTLs
ENSG00000184313	MROH7	chr1	54641755	54710266	exm61537	54548340	54548340	1	3.53e-06	-0.832524	0.177019	-6083	Distal non-eGene eQTLs
ENSG00000184313	MROH7	chr1	54641755	54710266	rs202160778:55049965:GC:G	54584292	54584293	0	2.52e-08	0.390771	0.0687337	-42035	Distal non-eGene eQTLs
ENSG00000231252	RP11-436K8.1	chr1	60659632	60867998	rs35919065:61324556:GT:G	60858884	60858885	0	4.18e-07	-0.248856	0.0483627	9114	Distal eGene eQTLs
ENSG00000162599	NFIA	chr1	60865260	61462793	rs71050110:61542770:G:GAGGGGAGA	61077098	61077098	0	2.9e-06	1.32203	0.278591	-211839	Distal eGene eQTLs
ENSG00000132849	PATJ	chr1	61742478	62178675	rs7551399:62207254:A:G	61741582	61741582	0	2.73e-12	0.914908	0.126816	895	Promoter-eGene eQTLs
ENSG00000162433	AK4	chr1	65147550	65232145	rs3934817:65613363:G:T	65147680	65147680	0	3.29e-11	-28.2776	4.14421	-131	Promoter-eGene eQTLs
ENSG00000116761	CTH	chr1	70411219	70439851	rs10889869:70877964:G:A	70412281	70412281	0	2.04e-11	-0.868162	0.125826	-1063	Promoter-eGene eQTLs
ENSG00000116791	CRYZ	chr1	74705483	74733408	rs59091667:75200595:C:G	74734911	74734911	0	6.63e-12	0.961042	0.135803	-1503	Promoter-eGene eQTLs
ENSG00000162616	DNAJB4	chr1	77979176	78017964	rs41311176:78470506:C:T	78004822	78004822	0	1.23e-15	-11.692	1.40242	-25647	Distal eGene eQTLs
ENSG00000117151	CTBS	chr1	84549607	84574480	rs112037879:84944478:G:A	84478795	84478795	0	3.16e-11	1.28359	0.187935	464	Promoter non-eGene eQTLs
ENSG00000117151	CTBS	chr1	84549607	84574480	rs12141472:85036784:C:T	84571101	84571101	1	2.21e-06	0.410817	0.0855361	3379	Distal eGene eQTLs
ENSG00000180869	LINC01555	chr1	84628231	84635020	rs143327345:85142363:C:CAGG	84676680	84676680	0	7.6e-11	0.445293	0.0665765	14123	Distal non-eGene eQTLs
ENSG00000117174	ZNHIT6	chr1	85649424	85708433	rs6689168:86174232:G:T	85708549	85708549	0	8.84e-32	1.53633	0.119816	-116	Promoter-eGene eQTLs
ENSG00000261737	RP4-612B15.3	chr1	86703503	86704462	rs3834007:87169592:TAAG:T	86703909	86703912	0	1.57e-11	-0.183662	0.0264599	553	Promoter-eGene eQTLs
ENSG00000228175	GEMIN8P4	chr1	89993594	89994321	rs28434526:90025174:A:T	89559615	89559615	0	4.07e-05	0.254425	0.061318	-34779	Distal non-eGene eQTLs
ENSG00000162669	HFM1	chr1	91260767	91404869	rs17131429:91870410:G:C	91404853	91404853	0	1.08e-29	0.909747	0.0740053	16	Promoter-eGene eQTLs
ENSG00000117505	DR1	chr1	93345889	93369498	rs10782959:93811569:A:G	93346012	93346012	0	1.24e-13	-1.88548	0.245555	-124	Promoter-eGene eQTLs
ENSG00000198691	ABCA4	chr1	93992836	94121132	rs3789398:94511533:G:A	94045977	94045977	1	6.47e-06	0.345666	0.0756167	75155	Distal eGene eQTLs
ENSG00000198691	ABCA4	chr1	93992836	94121132	rs3827713:94576524:G:C	94110968	94110968	0	9.77e-09	0.394057	0.0672667	10164	Distal eGene eQTLs
ENSG00000117528	ABCD3	chr1	94418456	94518666	rs72727492:94917600:A:G	94452044	94452044	0	1.73e-08	-3.61073	0.627524	-33589	Distal eGene eQTLs
ENSG00000143036	SLC44A3	chr1	94820343	94895246	rs10874895:95311928:C:G	94846372	94846372	0	1.93e-14	0.693765	0.0872812	-26030	Distal eGene eQTLs
ENSG00000162694	EXTL2	chr1	100872373	100895998	rs3737580:101360215:C:T	100894659	100894659	0	3.23e-07	-1.8111	0.348487	1339	Promoter-eGene eQTLs
ENSG00000134215	VAV3	chr1	107571161	107965144	rs17020055:108336533:A:C	107793911	107793911	0	5.07e-25	1.18159	0.106771	171233	Distal eGene eQTLs
ENSG00000085491	SLC25A24	chr1	108134037	108200849	rs61799378:108742130:T:C	108199508	108199508	0	6.64e-21	0.723741	0.0729227	1341	Promoter-eGene eQTLs
ENSG00000197780	TAF13	chr1	109062487	109076002	rs183177077:109656089:A:G	109113467	109113467	0	2.58e-05	0.91241	0.214322	212	Promoter non-eGene eQTLs
ENSG00000134222	PSRC1	chr1	109279557	109283186	rs649281:109799244:T:C	109256622	109256622	0	1.84e-07	-0.611252	0.115164	-6603	Distal non-eGene eQTLs
ENSG00000181754	AMIGO1	chr1	109504176	109509738	rs2570972:110052139:A:G	109509517	109509517	0	6.89e-22	4.87245	0.477501	221	Promoter-eGene eQTLs
ENSG00000168765	GSTM4	chr1	109656082	109674836	rs865774:110169190:C:T	109626568	109626568	0	3.41e-18	0.80266	0.0879183	-10464	Distal non-eGene eQTLs
ENSG00000116396	KCNC4	chr1	110211344	110283100	rs12739021:110842850:T:C	110300228	110300228	0	3.8e-09	0.543707	0.09022	38943	Distal non-eGene eQTLs
ENSG00000116459	ATP5F1	chr1	111448865	111462773	rs1270853:111991845:C:A	111449223	111449223	0	1.42e-08	2.23905	0.386671	-359	Promoter-eGene eQTLs
ENSG00000116793	PHTF1	chr1	113696832	113759489	rs7529353:114420462:G:A	113877840	113877840	1	5.82e-06	-0.370784	0.0807026	-21205	Distal non-eGene eQTLs
ENSG00000134262	AP4B1	chr1	113894749	113905201	exm2230834	113904943	113904943	0	2.94e-14	-3.15725	0.400239	258	Promoter-eGene eQTLs
ENSG00000134207	SYT6	chr1	114089292	114153919	rs12729894:114481962:T:G	113939340	113939340	0	2.67e-05	-0.592213	0.139374	-10148	Distal non-eGene eQTLs
ENSG00000134247	PTGFRN	chr1	116910058	116990358	rs17520400:117514675:G:A	116972053	116972053	0	3.02e-06	0.653177	0.137907	-61996	Distal eGene eQTLs
ENSG00000231365	RP11-418J17.1	chr1	119140397	119275973	rs10923754	119126017	119126017	0	1.35e-20	-0.721755	0.0733744	14654	Distal non-eGene eQTLs
ENSG00000270231	NBPF8	chr1	120436354	120467739	rs28971494:121138099:T:C	121396239	121396239	1	2.03e-07	-0.508329	0.0961162	515	Promoter non-eGene eQTLs
ENSG00000265241	RBM8A	chr1	145917715	145927678	rs139428292:145507646:G:A	145927447	145927447	0	2.97e-15	-14.1636	1.72424	231	Promoter-eGene eQTLs
ENSG00000233396	RP11-458D21.1	chr1	146052567	146061948	rs3811446:145471996:C:G	145963094	145963094	2	0.000134474	0.505384	0.131081	-1706	Promoter non-eGene eQTLs
ENSG00000263956	NBPF11	chr1	148102047	148152322	rs584323:146976471:G:A	147504660	147504660	1	5.39e-05	-0.300281	0.0735621	13215	Distal non-eGene eQTLs
ENSG00000261716	RP11-196G18.22	chr1	149844499	149849024	rs181487975:150123014:G:A	150150824	150150824	0	8.66e-06	5.17545	1.14841	-1641	Promoter non-eGene eQTLs
ENSG00000143450	OAZ3	chr1	151762900	151771334	rs2298294	151728869	151728869	0	9.69e-05	0.107602	0.0273251	-18436	Distal non-eGene eQTLs
ENSG00000272030	RP1-178F15.4	chr1	153631439	153634397	rs3806234:153631071:G:A	153658595	153658595	0	7.57e-06	-0.109683	0.0241787	59	Promoter non-eGene eQTLs
ENSG00000143578	CREB3L4	chr1	153967535	153974363	rs6661009:153940739:A:C	153968263	153968263	0	3.98e-13	0.690616	0.0920095	-729	Promoter-eGene eQTLs
ENSG00000225855	RUSC1-AS1	chr1	155316864	155324176	rs6692661:154839793:C:A	154867317	154867317	0	4.07e-06	-0.916654	0.19619	2963	Distal non-eGene eQTLs
ENSG00000163354	DCST2	chr1	155018521	155033781	rs11264297:155008973:T:C	155036497	155036497	0	7.75e-17	-4.9178	0.564282	-2716	Distal eGene eQTLs
ENSG00000163357	DCST1	chr1	155033825	155050930	rs11264298:155009258:G:A	155036782	155036782	0	2.98e-06	0.721816	0.152297	-2958	Distal eGene eQTLs
ENSG00000143537	ADAM15	chr1	155050567	155062775	rs11264298:155009258:G:A	155036782	155036782	0	5.48e-10	0.445563	0.0700479	-3001	Distal non-eGene eQTLs
ENSG00000143537	ADAM15	chr1	155050567	155062775	rs45444697:155034632:C:G	155062156	155062156	1	1.89e-05	-0.372286	0.0859985	-11590	Distal eGene eQTLs
ENSG00000169231	THBS3	chr1	155195589	155209051	rs760077:155178782:A:T	155208991	155208991	0	2.14e-10	0.459524	0.0705009	60	Promoter-eGene eQTLs
ENSG00000143303	RRNAD1	chr1	156728443	156736960	rs147665113:156695000:C:T	156725208	156725208	0	2.17e-07	-0.876714	0.166191	3234	Distal eGene eQTLs
ENSG00000198400	NTRK1	chr1	156815641	156881850	rs2150906:156785356:T:C	156815564	156815564	1	1.1e-07	0.818784	0.151409	76	Promoter-eGene eQTLs
ENSG00000027869	SH2D2A	chr1	156806244	156816862	rs2150906:156785356:T:C	156815564	156815564	0	1.84e-19	1.2643	0.132985	1298	Promoter-eGene eQTLs
ENSG00000198400	NTRK1	chr1	156815641	156881850	rs7546838:156785771:A:G	156815979	156815979	0	5e-14	-0.525823	0.0673149	-339	Promoter-eGene eQTLs
ENSG00000183853	KIRREL	chr1	157993274	158100262	rs1972216	158030950	158030950	1	5.68e-09	-0.627914	0.105441	-37677	Distal eGene eQTLs
ENSG00000085552	IGSF9	chr1	159927040	159945604	rs10752634:159905268:T:C	159935478	159935478	0	4.67e-11	14.9774	2.21316	10126	Distal eGene eQTLs
ENSG00000122218	COPA	chr1	160289274	160343400	rs4656892:160220213:A:G	160250423	160250423	0	3.29e-15	5.46271	0.666197	12108	Distal non-eGene eQTLs
ENSG00000215845	TSTD1	chr1	161037632	161038990	rs6427573:161013711:G:A	161043921	161043921	0	7.76e-21	0.927813	0.0936678	2056	Promoter non-eGene eQTLs
ENSG00000143157	POGK	chr1	166839448	166856344	1:166808933:GCGC:G	166839696	166839699	0	6.1e-25	-5.16584	0.46771	-249	Promoter-eGene eQTLs
ENSG00000143190	POU2F1	chr1	167220830	167427345	rs10918673:167235524:C:T	167266287	167266287	0	2.52e-06	-5.19614	1.08814	-45458	Distal eGene eQTLs
ENSG00000198821	CD247	chr1	167430641	167518610	rs7527714:167503586:C:T	167534349	167534349	0	3.97e-05	0.14102	0.0339373	19418	Distal non-eGene eQTLs
ENSG00000120370	GORAB	chr1	170532130	170553446	rs112197426:170501521:AC:A	170532380	170532381	0	3.64e-25	-1.93732	0.174449	-251	Promoter-eGene eQTLs
ENSG00000254154	RP4-798P15.3	chr1	177928789	178038007	rs16828594:177929379:C:T	177960244	177960244	1	1.59e-13	0.743182	0.0972443	77763	Distal eGene eQTLs
ENSG00000254154	RP4-798P15.3	chr1	177928789	178038007	rs79371453:177966389:C:T	177997254	177997254	0	1.37e-12	1.02865	0.140536	40753	Distal eGene eQTLs
ENSG00000254154	RP4-798P15.3	chr1	177928789	178038007	rs10913487:177968239:C:G	177999104	177999104	2	7.68e-06	0.55364	0.122132	38903	Distal eGene eQTLs
ENSG00000242193	RP11-568K15.1	chr1	178006137	178037950	rs200528330:178006221:C:T	178037086	178037086	1	1.38e-07	0.481989	0.0898662	864	Promoter-eGene eQTLs
ENSG00000162779	AXDND1	chr1	179365721	179554735	rs16853998:179334917:G:C	179365782	179365782	0	1.22e-15	0.546217	0.0655054	-62	Promoter-eGene eQTLs
ENSG00000162779	AXDND1	chr1	179365721	179554735	rs17369102:179335138:A:G	179366003	179366003	3	3.4e-06	-0.390131	0.0828047	-283	Promoter-eGene eQTLs
ENSG00000162779	AXDND1	chr1	179365721	179554735	rs35129223:179335499:C:CT	179366364	179366364	1	2.46e-06	0.371158	0.0776363	-644	Promoter-eGene eQTLs
ENSG00000162782	TDRD5	chr1	179591614	179691272	rs76644806:179561154:C:T	179592019	179592019	0	1.88e-63	0.579872	0.0285906	-406	Promoter-eGene eQTLs
ENSG00000143337	TOR1AIP1	chr1	179882043	179925000	rs1144575:179847402:T:G	179878267	179878267	0	1.05e-06	-0.387019	0.0780458	-464	Promoter non-eGene eQTLs
ENSG00000135835	KIAA1614	chr1	180913155	180951614	rs12026811:180935975:G:A	180966839	180966839	0	3.16e-05	-5.06398	1.20291	9643	Distal non-eGene eQTLs
ENSG00000116679	IVNS1ABP	chr1	185296389	185317329	rs4326589:184358996:C:T	184389862	184389862	0	2.22e-05	-3.03627	0.707303	-3158	Distal non-eGene eQTLs
ENSG00000023572	GLRX2	chr1	193096469	193106114	rs4657845:193072784:T:A	193103654	193103654	0	9.98e-06	0.223802	0.0500133	2460	Promoter-eGene eQTLs
ENSG00000000971	CFH	chr1	196651879	196747504	rs2821106:197384285:T:C	197415155	197415155	0	2.21e-05	2.35689	0.549004	-146951	Distal non-eGene eQTLs
ENSG00000163362	C1orf106	chr1	200891049	200915735	rs2271019:200861003:A:G	200891875	200891875	0	1.58e-05	0.317566	0.072659	-827	Promoter-eGene eQTLs
ENSG00000116857	TMEM9	chr1	201134773	201171574	rs77762614:201080110:C:T	201110982	201110982	1	8e-06	0.767354	0.169613	1584	Promoter non-eGene eQTLs
ENSG00000176393	RNPEP	chr1	201982373	202006147	rs11810017:201950949:T:C	201981821	201981821	0	7.15e-12	0.504092	0.0713513	551	Promoter-eGene eQTLs
ENSG00000117139	KDM5B	chr1	202724492	202809470	rs12132992:202761823:C:G	202792695	202792695	1	4.12e-08	-0.439787	0.0786208	16775	Distal eGene eQTLs
ENSG00000184774	MGAT4EP	chr1	202820267	202827225	rs4950923:202776448:G:A	202807320	202807320	0	1.42e-17	-0.620072	0.0693404	2150	Promoter non-eGene eQTLs
ENSG00000228288	PCAT6	chr1	202810955	202812156	rs2275895	202811402	202811402	0	1.19e-28	-0.908421	0.0755465	-448	Promoter-eGene eQTLs
ENSG00000117222	RBBP5	chr1	205086143	205122015	rs35603588:204315882:C:CT	204346754	204346754	0	1.18e-05	-1.06079	0.239047	504	Promoter non-eGene eQTLs
ENSG00000133056	PIK3C2B	chr1	204422629	204494724	rs60450179:204400157:T:C	204431029	204431029	0	1.53e-05	-2.38023	0.543761	63695	Distal eGene eQTLs
ENSG00000224717	RP11-576D8.4	chr1	205455930	205469024	rs2759282:204846772:C:T	204877644	204877644	0	5.68e-05	0.27214	0.0668756	-48993	Distal non-eGene eQTLs
ENSG00000133069	TMCC2	chr1	205228177	205273343	rs1172113:205226288:T:C	205257160	205257160	0	2.83e-14	-3.67004	0.46494	-28984	Distal eGene eQTLs
ENSG00000162873	KLHDC8A	chr1	205336066	205357090	rs7530732:205321833:T:C	205352705	205352705	0	3.98e-08	-3.20029	0.571467	4385	Distal eGene eQTLs
ENSG00000158715	SLC45A3	chr1	205657852	205680459	rs823130:205714372:C:T	205745244	205745244	0	6.04e-09	0.402967	0.0677902	5032	Distal non-eGene eQTLs
ENSG00000117280	RAB29	chr1	205767987	205775460	rs823114:205719532:G:A	205750404	205750404	0	3.58e-13	1.12432	0.149472	-128	Promoter non-eGene eQTLs
ENSG00000143486	EIF2D	chr1	206571293	206612463	rs74147415:206832659:T:G	206659314	206659314	0	3.12e-05	3.33359	0.791289	-23778	Distal non-eGene eQTLs
ENSG00000198570	RD3	chr1	211476523	211492917	rs367700286:211662675:TTTC:T	211489333	211489336	0	1.72e-09	11.804	1.91463	3584	Distal eGene eQTLs
ENSG00000223649	RP11-359E8.3	chr1	211492256	211492917	rs10863899	211492876	211492876	0	5.18e-16	0.184037	0.0217621	-621	Promoter-eGene eQTLs
ENSG00000065600	TMEM206	chr1	212363932	212414901	exm147155	212413978	212413978	0	6.7e-07	1.31538	0.260444	923	Promoter-eGene eQTLs
ENSG00000117691	NENF	chr1	212432888	212446379	rs141898885:212609873:G:A	212436531	212436531	0	8.6e-15	1.11368	0.138102	-3644	Distal eGene eQTLs
ENSG00000260805	RP11-61J19.5	chr1	212557834	212559731	rs112772142:212731917:T:TG	212558575	212558575	0	3.29e-05	0.154286	0.036734	1156	Promoter-eGene eQTLs
ENSG00000198468	FLVCR1-AS1	chr1	212852109	212858088	rs1874417:213036708:C:T	212863366	212863366	0	1.93e-96	1.12817	0.0402733	-5278	Distal eGene eQTLs
ENSG00000230461	PROX1-AS1	chr1	213817752	213988508	rs235924:214156860:T:C	213983517	213983517	0	1.3e-13	0.528574	0.0688957	4991	Distal eGene eQTLs
ENSG00000274895	RP11-478J18.2	chr1	213983794	213986419	rs66760546:214161754:AG:A	213988411	213988412	0	2.64e-43	2.39236	0.153151	-1992	Promoter-eGene eQTLs
ENSG00000196482	ESRRG	chr1	216503247	217137755	rs34000440:216903441:C:A	216730099	216730099	0	1.7e-05	-4.48161	1.02935	407656	Distal eGene eQTLs
ENSG00000143815	LBR	chr1	225401503	225428925	rs4653636:225615566:G:C	225427864	225427864	0	2.25e-05	-0.852055	0.198642	1061	Promoter-eGene eQTLs
ENSG00000143742	SRP9	chr1	225777814	225790466	rs6677132	225779895	225779895	0	1.22e-05	-3.96022	0.894147	-2082	Promoter-eGene eQTLs
ENSG00000143811	PYCR2	chr1	225919878	225924340	rs77157663:226111945:T:C	225924245	225924245	0	1.72e-09	-4.83251	0.78383	95	Promoter-eGene eQTLs
ENSG00000203685	STUM	chr1	226548801	226609214	rs837748:226737845:A:G	226550144	226550144	0	5.68e-08	-0.691769	0.125013	-1344	Promoter-eGene eQTLs
ENSG00000162910	MRPL55	chr1	228106680	228109312	rs849749	228109044	228109044	0	7.64e-09	0.542477	0.0919106	268	Promoter-eGene eQTLs
ENSG00000119283	TRIM67	chr1	231162113	231221556	rs6659596:231297752:T:A	231162006	231162006	0	1e-06	-1.6904	0.340255	106	Promoter-eGene eQTLs
ENSG00000135766	EGLN1	chr1	231363752	231425044	1:231558054:G:C	231422308	231422308	0	4.08e-07	-18.574	3.60621	2736	Distal eGene eQTLs
ENSG00000059588	TARBP1	chr1	234391314	234479103	rs61077059:234509858:GT:G	234374112	234374113	0	2.24e-05	-0.33684	0.0785056	-1926	Promoter non-eGene eQTLs
ENSG00000059588	TARBP1	chr1	234391314	234479103	rs941965:234614698:C:T	234478952	234478952	1	2.21e-05	-0.774182	0.180316	151	Promoter-eGene eQTLs
ENSG00000203667	COX20	chr1	244835323	244845057	rs10927331:244999396:G:A	244836094	244836094	0	5.26e-14	-7.04179	0.902306	-772	Promoter-eGene eQTLs
ENSG00000260855	RP11-439E19.10	chr1	246772302	246775772	rs6682907:246952424:C:A	246789122	246789122	0	1.57e-11	0.543705	0.0783305	-13109	Distal non-eGene eQTLs
ENSG00000277462	ZNF670	chr1	247036785	247078755	rs4925692:247267274:C:A	247103972	247103972	1	8.38e-07	0.368473	0.0736211	400	Promoter non-eGene eQTLs
ENSG00000188295	ZNF669	chr1	247099963	247104372	rs2270616:247267668:G:T	247104366	247104366	0	7e-25	0.851499	0.0772075	6	Promoter-eGene eQTLs
ENSG00000196418	ZNF124	chr1	247121976	247172016	rs10158232:247289429:A:T	247126127	247126127	0	3.61e-35	-0.693653	0.0507622	45889	Distal eGene eQTLs
ENSG00000232656	IDI2-AS1	chr10	1022667	1044201	rs11250244:1102710:C:A	1056770	1056770	0	2.97e-25	0.748286	0.0672368	-7232	Distal non-eGene eQTLs
ENSG00000232656	IDI2-AS1	chr10	1022667	1044201	rs34689634:1107778:C:CA	1061838	1061838	1	6.87e-06	-0.341943	0.0750213	-12300	Distal non-eGene eQTLs
ENSG00000067057	PFKP	chr10	3066334	3137712	rs56285785:3113637:T:TG	3071445	3071445	1	1.71e-08	-0.473014	0.0821704	-5112	Distal eGene eQTLs
ENSG00000107959	PITRM1	chr10	3137729	3172841	rs10903953:3114654:T:C	3072462	3072462	3	9.55e-06	0.35442	0.0790297	-6461	Distal non-eGene eQTLs
ENSG00000237399	PITRM1-AS1	chr10	3141633	3167972	rs12762657:3166833:G:A	3124641	3124641	1	2.36e-10	1.0449	0.160699	-58308	Distal non-eGene eQTLs
ENSG00000196372	ASB13	chr10	5638868	5666595	rs11256695:5687043:A:G	5645080	5645080	2	7.25e-08	0.947081	0.172599	21515	Distal eGene eQTLs
ENSG00000108021	FAM208B	chr10	5684839	5763740	rs140889384:5701622:AC:A	5659659	5659660	1	4.8e-06	-0.392629	0.0846829	6936	Distal non-eGene eQTLs
ENSG00000065675	PRKCQ	chr10	6427144	6580301	rs11259670:6622094:C:T	6580132	6580132	0	2.79e-11	0.443636	0.0647629	169	Promoter-eGene eQTLs
ENSG00000107537	PHYH	chr10	13277797	13302412	rs1058596:13341579:G:C	13299579	13299579	0	2.69e-18	-0.599871	0.0654821	2833	Distal eGene eQTLs
ENSG00000148484	RSU1	chr10	16590612	16817528	rs10732931	16721883	16721883	0	4.42e-12	-0.463725	0.0649479	95645	Distal eGene eQTLs
ENSG00000225213	RP11-197M22.2	chr10	16721353	16748377	rs4748314:16767367:C:T	16725368	16725368	1	6.51e-11	0.441356	0.0657421	23009	Distal eGene eQTLs
ENSG00000225213	RP11-197M22.2	chr10	16721353	16748377	rs11254169	16748232	16748232	0	4.21e-12	-0.777967	0.108849	145	Promoter-eGene eQTLs
ENSG00000148484	RSU1	chr10	16590612	16817528	rs11254169	16748232	16748232	1	5.18e-06	-0.520289	0.112616	69296	Distal eGene eQTLs
ENSG00000165995	CACNB2	chr10	18140678	18541869	rs4443967:18581361:C:T	18292432	18292432	0	3.98e-19	0.679928	0.0722715	-151755	Distal eGene eQTLs
ENSG00000165997	ARL5B	chr10	18659406	18681639	rs77952637:18597112:C:T	18308183	18308183	0	1.72e-05	1.57274	0.361402	-167506	Distal non-eGene eQTLs
ENSG00000136738	STAM	chr10	17644126	17715914	rs11386791:18698231:G:GA	18409302	18409302	0	3.51e-05	0.743898	0.177753	-268625	Distal non-eGene eQTLs
ENSG00000204740	MALRD1	chr10	19048772	19790401	rs72788548:19777982:G:A	19489053	19489053	1	5.55e-08	0.464809	0.0839323	-440282	Distal eGene eQTLs
ENSG00000120594	PLXDC2	chr10	19816240	20289856	rs6482066:20131614:G:C	19842685	19842685	0	3.96e-51	25.7062	1.47333	-26446	Distal eGene eQTLs
ENSG00000254635	WAC-AS1	chr10	28522653	28532743	rs2790455:28847077:A:G	28558148	28558148	0	1.43e-17	-0.667714	0.074683	-25655	Distal non-eGene eQTLs
ENSG00000095787	WAC	chr10	28532494	28623112	rs332129:28851196:G:A	28562267	28562267	0	6.96e-10	-0.44977	0.0711626	-29774	Distal eGene eQTLs
ENSG00000165322	ARHGAP12	chr10	31805405	31928876	rs144466157:32216157:A:AATTTTAAAACAAAG	31927229	31927229	0	1.64e-74	-11.6313	0.509529	1647	Promoter-eGene eQTLs
ENSG00000224812	TMEM72-AS1	chr10	44811025	44959689	rs10900142:45453628:G:T	44958180	44958180	1	1.74e-10	0.664005	0.101332	1509	Promoter-eGene eQTLs
ENSG00000224812	TMEM72-AS1	chr10	44811025	44959689	rs10900143	44958502	44958502	0	4.21e-35	1.13637	0.0832612	1187	Promoter-eGene eQTLs
ENSG00000165512	ZNF22	chr10	45000476	45005326	rs3758402:45475917:C:T	44980469	44980469	0	5.41e-06	-0.992788	0.215325	-1659	Promoter non-eGene eQTLs
ENSG00000188234	AGAP4	chr10	45825595	45853875	exm824935	46027444	46027444	0	9.5e-47	-0.883971	0.0538036	3270	Distal non-eGene eQTLs
ENSG00000279058	AGAP14P	chr10	46337225	46358714	rs7918832:51565606:G:A	46030216	46030216	0	5.9e-47	0.888165	0.0539006	498	Promoter non-eGene eQTLs
ENSG00000170324	FRMPD2	chr10	48153089	48274870	rs11101268:49445540:G:A	48237497	48237497	2	2.6e-08	-0.878818	0.154743	37373	Distal eGene eQTLs
ENSG00000197444	OGDHL	chr10	49734644	49762379	rs61846889:50970429:G:A	49762383	49762383	0	1.28e-11	4.13245	0.592535	-4	Promoter-eGene eQTLs
ENSG00000198964	SGMS1	chr10	50305587	50625163	rs10508930:52338100:A:G	50578340	50578340	0	3.1e-51	9.3822	0.536974	46823	Distal eGene eQTLs
ENSG00000226200	SGMS1-AS1	chr10	50624952	50641451	rs56138205:52384362:G:C	50624602	50624602	0	2.29e-09	-1.39058	0.22739	349	Promoter-eGene eQTLs
ENSG00000213667	PGGT1BP1	chr10	50726948	50727969	rs17497903:52420020:G:A	50660260	50660260	1	4.56e-05	0.345661	0.0838542	-4293	Distal non-eGene eQTLs
ENSG00000122952	ZWINT	chr10	56357229	56361275	exm826064	56361273	56361273	0	3.96e-09	-0.957657	0.159096	2	Promoter-eGene eQTLs
ENSG00000108091	CCDC6	chr10	59788764	59906656	rs3793865:61663377:T:C	59903619	59903619	0	1.83e-08	6.17549	1.07508	3037	Distal eGene eQTLs
ENSG00000072422	RHOBTB1	chr10	60869439	61001440	rs16915675	60887548	60887548	0	9.49e-15	-0.650716	0.0808319	113892	Distal eGene eQTLs
ENSG00000183346	C10orf107	chr10	61662962	61766766	rs71490861:63422876:A:G	61663118	61663118	0	5.13e-61	0.869802	0.0441013	-157	Promoter-eGene eQTLs
ENSG00000096746	HNRNPH3	chr10	68331175	68343191	rs71470514:70097502:T:TTTTTG	68337745	68337745	0	1.07e-05	-6.116	1.37145	-6571	Distal eGene eQTLs
ENSG00000165730	STOX1	chr10	68827542	68895432	rs884181:70586459:T:C	68826702	68826702	0	6.48e-28	0.763444	0.0645183	839	Promoter-eGene eQTLs
ENSG00000156502	SUPV3L1	chr10	69180233	69209099	rs12780191:70988514:C:T	69228758	69228758	0	1.55e-09	-0.463238	0.0749211	-8455	Distal non-eGene eQTLs
ENSG00000156515	HK1	chr10	69269985	69401882	rs61869987:71076335:G:A	69316579	69316579	0	4.91e-08	-22.8529	4.10945	-46595	Distal eGene eQTLs
ENSG00000099284	H2AFY2	chr10	70052797	70112280	rs3858168:71831092:C:T	70071336	70071336	0	1.31e-17	1.33869	0.14953	-18540	Distal eGene eQTLs
ENSG00000079332	SAR1A	chr10	70147290	70170523	rs2894110:71894255:T:C	70134499	70134499	1	3.7e-05	0.470458	0.112759	-1565	Promoter non-eGene eQTLs
ENSG00000079332	SAR1A	chr10	70147290	70170523	rs10999158:71905695:A:G	70145939	70145939	0	1.08e-24	0.694189	0.0632339	24584	Distal eGene eQTLs
ENSG00000166228	PCBD1	chr10	70882281	70888784	rs2854614:72648083:T:G	70888326	70888326	0	1.2e-11	-0.533351	0.0763646	458	Promoter-eGene eQTLs
ENSG00000148719	DNAJB12	chr10	72332831	72355230	rs9416017:74100279:T:C	72340521	72340521	0	6.52e-07	-1.05456	0.208569	14709	Distal eGene eQTLs
ENSG00000166321	NUDT13	chr10	73110376	73131828	rs200923176:74991405:T:TCAAG	73231647	73231647	0	2.7e-23	-0.88727	0.0837341	-63481	Distal non-eGene eQTLs
ENSG00000138286	FAM149B1	chr10	73168167	73244504	rs16930450:75005282:T:C	73245524	73245524	0	4.19e-05	1.71364	0.413668	1836	Promoter non-eGene eQTLs
ENSG00000224596	ZMIZ1-AS1	chr10	78943329	79067895	rs12412430:80831898:A:G	79072141	79072141	0	1.3e-12	0.999566	0.136409	-4246	Distal eGene eQTLs
ENSG00000122378	FAM213A	chr10	80407830	80437115	rs1417220:82168154:G:A	80408398	80408398	0	3.91e-09	-5.11153	0.848917	-569	Promoter-eGene eQTLs
ENSG00000108219	TSPAN14	chr10	80454167	80533123	rs11185932:82295398:G:A	80535642	80535642	0	2.06e-07	-1.30006	0.24594	300	Promoter non-eGene eQTLs
ENSG00000204033	LRIT2	chr10	84220496	84225589	rs12217769:85981842:A:G	84222086	84222086	0	4.12e-30	25.6989	2.07255	3503	Distal eGene eQTLs
ENSG00000148604	RGR	chr10	84245054	84259960	rs10736318:85990621:C:T	84230865	84230865	1	5.53e-06	-0.330424	0.0717418	-36230	Distal non-eGene eQTLs
ENSG00000148602	LRIT1	chr10	84231594	84241461	rs4615966:85997810:C:T	84238054	84238054	0	4.25e-08	1.91491	0.342679	3407	Distal eGene eQTLs
ENSG00000148604	RGR	chr10	84245054	84259960	rs10736319:86004238:T:C	84244482	84244482	0	1.34e-35	0.758037	0.0550496	571	Promoter-eGene eQTLs
ENSG00000151303	RP11-96C23.13	chr10	86992407	87010203	rs1240380:88730762:G:T	86971005	86971005	0	2.4e-08	0.493768	0.0867206	-1524	Promoter non-eGene eQTLs
ENSG00000234043	RP11-56M3.1	chr10	91152606	91153349	rs61857950:92921360:A:G	91161603	91161603	0	7.96e-06	-0.261949	0.057887	1409	Promoter non-eGene eQTLs
ENSG00000174721	FGFBP3	chr10	91906590	91909483	exm841649	91908651	91908651	0	9.73e-08	0.708946	0.130534	832	Promoter-eGene eQTLs
ENSG00000187553	CYP26C1	chr10	93060809	93069536	rs860668:94750745:G:A	92990988	92990988	0	6.74e-23	-0.309008	0.0294683	-156275	Distal non-eGene eQTLs
ENSG00000155629	PIK3AP1	chr10	96593313	96720514	rs117344006:98479250:C:G	96719493	96719493	0	4.03e-06	2.51457	0.537922	1021	Promoter-eGene eQTLs
ENSG00000165879	FRAT1	chr10	97319268	97321915	rs3832695:99080246:CT:C	97320489	97320490	0	3.58e-06	-0.534431	0.113707	-1222	Promoter-eGene eQTLs
ENSG00000023839	ABCC2	chr10	99782733	99852192	rs7077718:101689378:G:C	99929621	99929621	0	2.58e-06	-1.56636	0.32833	-2611	Distal non-eGene eQTLs
ENSG00000272572	RP11-179B2.2	chr10	100911104	100912739	rs7184	100986474	100986474	0	9.14e-16	0.144729	0.0172743	893	Promoter non-eGene eQTLs
ENSG00000055950	MRPL43	chr10	100969459	100987515	rs2863095	100986746	100986746	0	7.41e-46	3.01092	0.18562	769	Promoter-eGene eQTLs
ENSG00000095539	SEMA4G	chr10	100969519	100985871	rs3740484:102747363:G:T	100987606	100987606	0	1.66e-06	-0.637167	0.131003	-239	Promoter non-eGene eQTLs
ENSG00000269609	RPARP-AS1	chr10	102449818	102461106	rs2281878:104210735:C:A	102450978	102450978	1	1.32e-10	0.570791	0.0865127	-1161	Promoter-eGene eQTLs
ENSG00000269609	RPARP-AS1	chr10	102449818	102461106	rs372995269:104215075:CTCTT:C	102455318	102455322	0	2.47e-12	-0.809139	0.111916	-5501	Distal eGene eQTLs
ENSG00000148795	CYP17A1	chr10	102830532	102837533	rs9420881:104614613:C:T	102854856	102854856	0	1.66e-26	0.442197	0.038576	-633	Promoter non-eGene eQTLs
ENSG00000214435	AS3MT	chr10	102869517	102901899	rs12416687:104629011:T:C	102869254	102869254	0	8.15e-33	-0.913613	0.0698376	262	Promoter-eGene eQTLs
ENSG00000107954	NEURL1	chr10	103493980	103592552	rs7067666	103572695	103572695	1	7.57e-07	0.344738	0.0685932	-78716	Distal eGene eQTLs
ENSG00000107960	OBFC1	chr10	103882543	103918205	rs183916243:105678043:T:G	103918285	103918285	0	1.8e-07	-1.50786	0.283866	-80	Promoter-eGene eQTLs
ENSG00000260461	RP11-541N10.3	chr10	103877375	103879761	rs183916243:105678043:T:G	103918285	103918285	0	3.59e-05	-0.762314	0.182388	-80	Promoter non-eGene eQTLs
ENSG00000065621	GSTO2	chr10	104268874	104304945	rs7099030:106038347:T:C	104278589	104278589	0	1.13e-14	-3.17468	0.395554	-9716	Distal eGene eQTLs
ENSG00000148700	ADD3	chr10	109996369	110135565	rs59339754:111800116:C:T	110040358	110040358	0	8.22e-15	20.8197	2.5797	-43990	Distal eGene eQTLs
ENSG00000203876	ADD3-AS1	chr10	109940105	110008381	rs11194963:111806469:C:A	110046711	110046711	0	3.47e-07	1.18175	0.227999	-50343	Distal non-eGene eQTLs
ENSG00000023041	ZDHHC6	chr10	112424429	112446917	rs2277205:114206683:C:T	112446925	112446925	0	5.69e-13	-2.43396	0.326596	-8	Promoter-eGene eQTLs
ENSG00000165806	CASP7	chr10	113679163	113730907	rs12359677:115439259:G:A	113679500	113679500	1	7.48e-09	0.530891	0.0898878	-338	Promoter-eGene eQTLs
ENSG00000165806	CASP7	chr10	113679163	113730907	rs10553596:115439640:CTT:C	113679881	113679883	0	2.49e-39	1.08669	0.0740512	-719	Promoter-eGene eQTLs
ENSG00000099204	ABLIM1	chr10	114431114	114685003	rs7904491:116387668:T:A	114627909	114627909	0	1.13e-09	23.4287	3.7564	57094	Distal eGene eQTLs
ENSG00000227165	WDR11-AS1	chr10	120761813	120851345	rs10886785:122610391:C:G	120850879	120850879	0	7.19e-24	-0.844543	0.0785334	466	Promoter-eGene eQTLs
ENSG00000107669	ATE1	chr10	121740422	121928801	rs11200264:123685862:C:A	121926347	121926347	0	2.34e-09	1.82951	0.299339	2454	Promoter-eGene eQTLs
ENSG00000226864	ATE1-AS1	chr10	121928313	121951965	rs10887024:123688152:A:T	121928637	121928637	0	2.26e-46	-0.830856	0.0508431	-325	Promoter-eGene eQTLs
ENSG00000166033	HTRA1	chr10	122461526	122514908	rs4991294:124238188:T:G	122478672	122478672	0	1.44e-18	0.600723	0.0650019	-17147	Distal eGene eQTLs
ENSG00000166033	HTRA1	chr10	122461526	122514908	rs5788561:124243660:CA:C	122484144	122484145	1	6.83e-16	-1.08334	0.128686	-22619	Distal eGene eQTLs
ENSG00000179988	PSTK	chr10	122954382	122997513	rs117789335:125617894:C:T	123858378	123858378	1	2.53e-05	0.815107	0.191247	81889	Distal non-eGene eQTLs
ENSG00000189319	FAM53B	chr10	124619293	124744269	rs750689:126693480:G:A	125004911	125004911	0	1.14e-05	2.10398	0.473334	-8847	Distal non-eGene eQTLs
ENSG00000170430	MGMT	chr10	129467185	129768007	rs16906252:131265545:C:T	129467281	129467281	3	1.43e-05	-0.722895	0.164561	-97	Promoter-eGene eQTLs
ENSG00000130649	CYP2E1	chr10	133520407	133561220	rs76083644:134528421:A:G	132714917	132714917	2	5.57e-05	0.67884	0.166628	-177097	Distal non-eGene eQTLs
ENSG00000127884	ECHS1	chr10	133362481	133373689	exm868461	133373302	133373302	0	1.75e-07	-1.0418	0.1959	387	Promoter-eGene eQTLs
ENSG00000130649	CYP2E1	chr10	133520407	133561220	rs4077586:135237003:G:A	133423499	133423499	0	8.65e-26	-0.855532	0.0758955	1073	Promoter non-eGene eQTLs
ENSG00000177042	TMEM80	chr11	695429	705028	rs7945422:695854:C:T	695854	695854	1	3.85e-16	0.841534	0.0990339	-426	Promoter-eGene eQTLs
ENSG00000279672	CMB9-55F22.1	chr11	779618	780755	rs7104929:784340:C:G	784340	784340	0	3.9e-51	0.899349	0.0515407	-6762	Distal non-eGene eQTLs
ENSG00000177697	CD151	chr11	832844	839831	rs142707435:833818:CCCG:C	833818	833821	0	1.78e-25	2.83718	0.253582	-975	Promoter-eGene eQTLs
ENSG00000174672	BRSK2	chr11	1389900	1462689	rs7107140:1434136:G:A	1412906	1412906	0	2.71e-08	0.469832	0.0828415	-23007	Distal eGene eQTLs
ENSG00000110713	NUP98	chr11	3671084	3797792	rs11029783:3816470:T:C	3795240	3795240	0	7.22e-21	0.774304	0.0780986	2552	Distal eGene eQTLs
ENSG00000132256	TRIM5	chr11	5663558	5938619	rs7129909:5711177:A:G	5689947	5689947	0	6.11e-09	-0.353386	0.0594713	248672	Distal eGene eQTLs
ENSG00000110169	HPX	chr11	6431050	6442617	rs2723647:6480063:A:G	6458833	6458833	0	7.39e-07	0.48625	0.0966569	15626	Distal non-eGene eQTLs
ENSG00000166337	TAF10	chr11	6606297	6612667	rs4758440:6626597:C:G	6605367	6605367	0	4.11e-18	-1.80745	0.198501	7300	Distal eGene eQTLs
ENSG00000255420	CASC23	chr11	8011279	8016489	rs34812123:8053407:G:A	8031860	8031860	0	7.13e-06	0.311127	0.0683824	-15371	Distal eGene eQTLs
ENSG00000166402	TUB	chr11	8019245	8106112	rs7932687:8088757:C:A	8067210	8067210	1	2.61e-05	-0.29691	0.069781	-47966	Distal eGene eQTLs
ENSG00000166436	TRIM66	chr11	8612038	8671866	rs35981610:8703973:G:GC	8682426	8682426	0	1.53e-44	0.885689	0.0556599	-15	Promoter non-eGene eQTLs
ENSG00000175348	TMEM9B	chr11	8947295	8965011	rs1835790:8893298:A:C	8871751	8871751	1	1.81e-07	-1.04234	0.196255	39200	Distal non-eGene eQTLs
ENSG00000175348	TMEM9B	chr11	8947295	8965011	rs7940895:8986019:G:C	8964472	8964472	0	7e-11	-0.841283	0.125534	539	Promoter-eGene eQTLs
ENSG00000254860	TMEM9B-AS1	chr11	8964676	8977527	rs59454329:8987003:G:T	8965456	8965456	0	4.46e-55	1.2075	0.0657731	-781	Promoter-eGene eQTLs
ENSG00000133805	AMPD3	chr11	10308314	10507579	rs7111970:10471680:G:A	10450133	10450133	0	3.38e-48	0.906477	0.0540616	-141820	Distal eGene eQTLs
ENSG00000177112	MRVI1-AS1	chr11	10541273	10599932	rs1462941:10563090:G:T	10541543	10541543	0	6.28e-12	-0.233715	0.0329861	-271	Promoter-eGene eQTLs
ENSG00000246308	RP11-685M7.3	chr11	10809298	10822931	rs10840493:10827950:T:C	10806403	10806403	0	3.64e-07	0.105194	0.020334	2894	Distal eGene eQTLs
ENSG00000133794	ARNTL	chr11	13276653	13387266	rs72867447:13301875:C:G	13280328	13280328	0	4.28e-05	-1.69054	0.40861	-3676	Distal eGene eQTLs
ENSG00000184669	OR7E14P	chr11	17013999	17053024	rs4757467:17001584:T:C	16980037	16980037	1	1.03e-06	-0.339207	0.0683515	-5024	Distal non-eGene eQTLs
ENSG00000110700	RPS13	chr11	17074390	17077787	rs61147221:17004018:C:T	16982471	16982471	0	9.39e-09	1.66497	0.283873	-7458	Distal non-eGene eQTLs
ENSG00000110700	RPS13	chr11	17074390	17077787	rs71469371:17180136:C:A	17158589	17158589	1	1.01e-11	-0.874915	0.124782	49394	Distal non-eGene eQTLs
ENSG00000244398	RP11-466H18.1	chr11	16974694	16975013	exm2249718	17386949	17386949	0	4.09e-05	0.306907	0.0739813	2382	Promoter non-eGene eQTLs
ENSG00000006071	ABCC8	chr11	17392886	17476845	rs985136:17497794:C:G	17476247	17476247	0	7.44e-19	0.642461	0.0688779	598	Promoter-eGene eQTLs
ENSG00000166788	SAAL1	chr11	18069936	18106091	rs148650821:18127558:C:CCGG	18106011	18106011	0	1.1e-35	-0.960231	0.0696258	80	Promoter-eGene eQTLs
ENSG00000166796	LDHC	chr11	18412308	18452058	rs11605386:18433720:C:G	18412173	18412173	0	1.27e-107	1.00947	0.0328034	134	Promoter-eGene eQTLs
ENSG00000177054	ZDHHC13	chr11	19117100	19176422	rs117368983:19140743:C:T	19119196	19119196	1	1.03e-06	-0.950646	0.191564	-2097	Promoter-eGene eQTLs
ENSG00000134343	ANO3	chr11	26309600	26663288	rs11029525:26355874:A:C	26334327	26334327	0	5.96e-10	0.940676	0.148219	-24728	Distal eGene eQTLs
ENSG00000135363	LMO2	chr11	33858577	33892289	rs10768036:33912937:T:C	33891390	33891390	0	3.46e-05	0.543172	0.129701	899	Promoter-eGene eQTLs
ENSG00000121691	CAT	chr11	34438926	34472062	rs1001179:34460231:C:T	34438684	34438684	1	6.96e-08	0.431636	0.0785511	241	Promoter-eGene eQTLs
ENSG00000149089	APIP	chr11	34853095	34916499	rs16926448:34937698:G:A	34916151	34916151	1	7.76e-12	-0.715562	0.101465	348	Promoter-eGene eQTLs
ENSG00000149089	APIP	chr11	34853095	34916499	rs112032820:34938074:C:T	34916527	34916527	0	1e-93	1.22019	0.0446035	-28	Promoter-eGene eQTLs
ENSG00000255542	RP4-683L5.1	chr11	35419058	35421002	rs112697411:35428186:G:GA	35406639	35406639	0	7.13e-06	0.225336	0.0495283	13424	Distal non-eGene eQTLs
ENSG00000166326	TRIM44	chr11	35662806	35818007	rs2942382:35837132:T:C	35815582	35815582	0	6.77e-06	-4.37641	0.959491	-152777	Distal eGene eQTLs
ENSG00000135362	PRR5L	chr11	36296289	36465204	rs12281565:36471571:A:G	36450021	36450021	0	6.69e-15	0.716661	0.0884792	-153733	Distal eGene eQTLs
ENSG00000148948	LRRC4C	chr11	40114204	41459773	rs998447	40289239	40289239	0	5.67e-33	0.79095	0.06028	1170534	Distal eGene eQTLs
ENSG00000279675	RP11-454H19.2	chr11	40107245	40112599	rs998447	40289239	40289239	0	1.3e-14	0.535731	0.0669183	1170534	Distal non-eGene eQTLs
ENSG00000148948	LRRC4C	chr11	40114204	41459773	rs61882947:41894476:C:T	41872926	41872926	1	2.76e-05	-1.1236	0.264901	-17006	Distal non-eGene eQTLs
ENSG00000149084	HSD17B12	chr11	43680559	43856617	rs34389751:43806646:GT:G	43785096	43785097	0	1.03e-61	21.7294	1.09289	-104538	Distal eGene eQTLs
ENSG00000110455	ACCS	chr11	44065926	44084222	rs2074038:44087989:G:T	44066439	44066439	0	1.87e-24	1.14199	0.104643	-514	Promoter-eGene eQTLs
ENSG00000085117	CD82	chr11	44564428	44620363	rs17613255:44601260:G:A	44579710	44579710	0	7.79e-23	1.03605	0.0989655	-15283	Distal eGene eQTLs
ENSG00000085117	CD82	chr11	44564428	44620363	rs55954253:44601286:G:A	44579736	44579736	1	8.65e-09	-0.473266	0.0804868	-15309	Distal eGene eQTLs
ENSG00000165912	PACSIN3	chr11	47177526	47186443	rs201193777:46629461:CA:C	46607911	46607912	0	2.69e-05	0.323087	0.0760586	9998	Distal non-eGene eQTLs
ENSG00000175216	CKAP5	chr11	46743049	46846308	rs2306353:47256708:C:T	47235157	47235157	0	6.13e-05	-4.53691	1.12002	-20692	Distal non-eGene eQTLs
ENSG00000110514	MADD	chr11	47269162	47330031	rs10501320	47272248	47272248	3	9.57e-06	-0.349904	0.0780296	-3087	Distal eGene eQTLs
ENSG00000110514	MADD	chr11	47269162	47330031	exm904813	47285079	47285079	0	1.42e-13	-1.03871	0.135614	-15918	Distal eGene eQTLs
ENSG00000213593	TMX2	chr11	57712601	57740973	rs10896633:57424040:T:C	57656568	57656568	0	3.89e-11	3.66565	0.539335	-7576	Distal non-eGene eQTLs
ENSG00000110048	OSBP	chr11	59574399	59616144	rs505431:59532072:T:C	59764599	59764599	0	7.87e-06	1.86107	0.411032	-9624	Distal non-eGene eQTLs
ENSG00000257052	RP11-881M11.2	chr11	60906790	60909742	11:60686070:C:CT	60918598	60918598	0	7.86e-05	-0.134901	0.0338101	-4724	Distal non-eGene eQTLs
ENSG00000013725	CD6	chr11	60971681	61020377	exm915388	61008737	61008737	0	3.4e-05	-0.122217	0.0291508	-37057	Distal eGene eQTLs
ENSG00000110107	PRPF19	chr11	60890731	60906588	rs34085615:60903633:AT:A	61136161	61136162	0	2.38e-06	-1.96414	0.41029	9303	Distal non-eGene eQTLs
ENSG00000006118	TMEM132A	chr11	60924464	60937159	exm915612	61138807	61138807	1	8.88e-07	-0.674697	0.135126	6657	Distal non-eGene eQTLs
ENSG00000167987	VPS37C	chr11	61130257	61161617	rs74555568:60907886:C:T	61140414	61140414	1	3.84e-13	0.786535	0.104712	21203	Distal eGene eQTLs
ENSG00000279549	AP000437.3	chr11	61143381	61145464	rs74483081:60913290:G:C	61145818	61145818	0	3.96e-07	0.257961	0.0500239	-354	Promoter-eGene eQTLs
ENSG00000167987	VPS37C	chr11	61130257	61161617	rs519296	61152282	61152282	0	4.02e-51	0.996353	0.0571101	9335	Distal eGene eQTLs
ENSG00000110108	TMEM109	chr11	60913875	60923443	rs60905595:60924896:C:A	61157424	61157424	0	3.7e-05	-0.914764	0.219248	-11960	Distal non-eGene eQTLs
ENSG00000110448	CD5	chr11	61102396	61127852	rs483398:60924920:T:C	61157448	61157448	0	1.71e-07	-0.483309	0.0908144	-11984	Distal non-eGene eQTLs
ENSG00000134825	TMEM258	chr11	61768502	61792802	rs7102974:61560035:C:T	61792563	61792563	0	3.4e-09	1.43912	0.238025	239	Promoter-eGene eQTLs
ENSG00000134825	TMEM258	chr11	61768502	61792802	exm-rs1535	61830500	61830500	1	2.97e-06	0.341657	0.0720745	-1182	Promoter non-eGene eQTLs
ENSG00000167995	BEST1	chr11	61949822	61965515	rs972355:61717337:G:C	61949865	61949865	0	7.64e-42	-7.92093	0.518561	-44	Promoter-eGene eQTLs
ENSG00000255553	RP11-810P12.5	chr11	62077278	62082184	rs35435184:61840165:C:T	62072693	62072693	0	1.71e-12	-2.51913	0.345735	359	Promoter non-eGene eQTLs
ENSG00000149480	MTA2	chr11	62593215	62601840	rs11231155	62598147	62598147	0	1.81e-15	0.532268	0.0642543	3693	Distal eGene eQTLs
ENSG00000168004	HRASLS5	chr11	63461405	63491194	rs2187383:62775898:A:C	63008426	63008426	0	6.13e-05	-0.286604	0.0707547	7413	Distal non-eGene eQTLs
ENSG00000176485	PLA2G16	chr11	63573196	63616883	rs58658207:63382023:C:A	63614551	63614551	0	2.45e-22	3.90682	0.378202	2332	Promoter-eGene eQTLs
ENSG00000245532	NEAT1	chr11	65422775	65445540	rs674485	65429922	65429922	0	8.75e-22	-68.7926	6.76109	-7148	Distal eGene eQTLs
ENSG00000172922	RNASEH2C	chr11	65714897	65720947	rs112971520:65641496:G:A	65874025	65874025	1	5.72e-05	0.632695	0.155542	-433	Promoter non-eGene eQTLs
ENSG00000172803	SNX32	chr11	65833642	65856896	NHGRI_notinECorHUNT_chr11_65656564	65889093	65889093	0	1.52e-33	0.859708	0.0648165	231975	Distal non-eGene eQTLs
ENSG00000149823	VPS51	chr11	65089325	65111860	rs118019189:65815083:C:T	66047612	66047612	0	1.5e-07	7.53504	1.4092	1568	Promoter non-eGene eQTLs
ENSG00000175115	PACS1	chr11	66070364	66244747	rs11227439:66025679:G:A	66258208	66258208	0	9.53e-10	-4.89845	0.781669	-914	Promoter non-eGene eQTLs
ENSG00000173156	RHOD	chr11	67056819	67072013	rs114895445:66824261:C:T	67056790	67056790	0	8.58e-13	-0.250704	0.033922	28	Promoter-eGene eQTLs
ENSG00000175544	CABP4	chr11	67452407	67460313	rs7936800:67220865:A:G	67453394	67453394	0	4.1e-05	7.35713	1.77383	-988	Promoter-eGene eQTLs
ENSG00000255119	RP11-655M14.12	chr11	67605522	67606642	rs1531514:67398862:A:T	67631391	67631391	0	1.15e-49	0.941095	0.0550061	-1461	Promoter non-eGene eQTLs
ENSG00000006534	ALDH3B1	chr11	68008579	68029282	rs308338:67776242:G:A	68008772	68008772	0	3.32e-09	-0.219716	0.0363142	-194	Promoter-eGene eQTLs
ENSG00000197345	MRPL21	chr11	68891277	68903835	rs111612765:68671280:G:GCCGCCGCCATCTTC	68903812	68903812	0	4.38e-79	-3.34498	0.140016	23	Promoter-eGene eQTLs
ENSG00000172890	NADSYN1	chr11	71453110	71524107	rs4944949:71160395:G:C	71449349	71449349	0	1.78e-06	1.57255	0.324344	-675	Promoter non-eGene eQTLs
ENSG00000251143	RP11-849H4.4	chr11	72014292	72020910	rs7115200:71752160:T:G	72041114	72041114	0	7.95e-08	-0.387191	0.0707899	39579	Distal non-eGene eQTLs
ENSG00000214530	STARD10	chr11	72754730	72794168	rs77437595:72485279:A:T	72774234	72774234	0	7.15e-06	1.58539	0.348509	19934	Distal eGene eQTLs
ENSG00000168010	ATG16L2	chr11	72814309	72843674	rs10898880:72525111:C:A	72814066	72814066	0	1.75e-05	0.44401	0.102131	242	Promoter-eGene eQTLs
ENSG00000054965	FAM168A	chr11	73400488	73598189	rs11606281:73307762:A:T	73596717	73596717	1	1.71e-05	0.347644	0.0798642	1472	Promoter-eGene eQTLs
ENSG00000149273	RPS3	chr11	75399487	75422280	rs3133187	75399545	75399545	0	9.53e-24	-31.4973	2.93809	-59	Promoter-eGene eQTLs
ENSG00000171533	MAP6	chr11	75586919	75669120	rs1145696:75326736:G:C	75615691	75615691	0	6.35e-12	-0.662452	0.0935211	53429	Distal eGene eQTLs
ENSG00000255135	RP11-111M22.3	chr11	76441339	76444656	rs73002555:76082062:A:G	76371018	76371018	0	1.34e-16	-1.72639	0.199782	9953	Distal non-eGene eQTLs
ENSG00000182704	TSKU	chr11	76782252	76798154	rs1149613:76497432:G:C	76786388	76786388	0	3.77e-07	-0.605725	0.117238	-4137	Distal eGene eQTLs
ENSG00000178301	AQP11	chr11	77589392	77610355	11:77300817:C:CCG	77589772	77589772	0	1.71e-05	0.396664	0.0911366	-381	Promoter-eGene eQTLs
ENSG00000246174	KCTD21-AS1	chr11	78139772	78175323	rs492065:77831471:T:A	78120425	78120425	1	1.43e-06	-0.473697	0.0967778	19235	Distal non-eGene eQTLs
ENSG00000188997	KCTD21	chr11	78171250	78188822	rs492065:77831471:T:A	78120425	78120425	0	4.44e-18	-0.825026	0.0907088	19235	Distal non-eGene eQTLs
ENSG00000137513	NARS2	chr11	78435962	78574874	rs10793337:78285875:A:T	78574830	78574830	0	7.57e-37	1.0942	0.0777404	44	Promoter-eGene eQTLs
ENSG00000254676	RP11-727A23.4	chr11	83180145	83184520	11:83435543:A:T	83724500	83724500	0	5.57e-05	-0.1122	0.0275391	-80898	Distal non-eGene eQTLs
ENSG00000171204	TMEM126B	chr11	85628574	85636539	rs575050:85339542:G:T	85628498	85628498	0	3.13e-07	-0.993171	0.190872	75	Promoter-eGene eQTLs
ENSG00000171202	TMEM126A	chr11	85647968	85656547	rs7116195:85373668:A:G	85662624	85662624	0	1.46e-09	-0.831192	0.134217	20284	Distal non-eGene eQTLs
ENSG00000151376	ME3	chr11	86441109	86672636	rs61703751:86383876:C:A	86672834	86672834	0	9.15e-15	0.87102	0.108128	-198	Promoter-eGene eQTLs
ENSG00000278989	RP11-762L8.6	chr11	86434925	86437282	rs61703751:86383876:C:A	86672834	86672834	0	2.95e-17	0.942943	0.106613	-198	Promoter non-eGene eQTLs
ENSG00000174804	FZD4	chr11	86945680	86955391	rs56870133:86667781:G:GGT	86956739	86956739	0	1.01e-08	-0.523559	0.089471	-1348	Promoter-eGene eQTLs
ENSG00000123892	RAB38	chr11	88113243	88175467	rs7102810:87908216:G:A	88175048	88175048	0	2.24e-18	-0.987029	0.107464	419	Promoter-eGene eQTLs
ENSG00000280367	RP11-121L10.2	chr11	90223154	90226538	rs3824897	90221753	90221753	0	6.29e-28	-0.837729	0.0707753	1400	Promoter-eGene eQTLs
ENSG00000214376	VSTM5	chr11	93818233	93850531	rs11020539:93583011:C:T	93849845	93849845	0	1.16e-09	-0.680719	0.109209	686	Promoter-eGene eQTLs
ENSG00000134627	PIWIL4	chr11	94543841	94621421	rs76114211:94292231:A:C	94559065	94559065	0	9.1e-09	1.42874	0.243358	-15225	Distal eGene eQTLs
ENSG00000110218	PANX1	chr11	94128929	94181972	rs11021038:94824205:A:G	95091041	95091041	3	5.09e-05	-0.326164	0.0796347	-1231	Promoter non-eGene eQTLs
ENSG00000184384	MAML2	chr11	95976599	96343180	rs693182	96237040	96237040	0	1.14e-05	1.26915	0.285515	106140	Distal eGene eQTLs
ENSG00000149231	CCDC82	chr11	96352770	96389923	rs11021568:96121855:C:T	96388691	96388691	0	3.1e-54	17.3641	0.95592	1232	Promoter-eGene eQTLs
ENSG00000248027	CTD-2383M3.1	chr11	100684163	100687955	rs11224426	100744892	100744892	0	5.09e-15	0.565946	0.0695386	-57239	Distal non-eGene eQTLs
ENSG00000110675	ELMOD1	chr11	107591092	107666779	rs7935762:107461791:C:G	107591065	107591065	0	2.38e-27	1.40199	0.119979	26	Promoter-eGene eQTLs
ENSG00000110660	SLC35F2	chr11	107790992	107928293	rs79170540:107748028:C:T	107877302	107877302	1	3.85e-09	0.775994	0.128816	50991	Distal eGene eQTLs
ENSG00000197580	BCO2	chr11	112175468	112224699	rs45524838:112049858:GAAGA:G	112179135	112179139	1	4.11e-07	0.3796	0.0737189	-3668	Distal eGene eQTLs
ENSG00000254638	RP11-356J5.4	chr11	112165198	112172606	rs11214115:112050326:A:T	112179603	112179603	1	2.73e-07	-0.408448	0.0780877	-6997	Distal eGene eQTLs
ENSG00000255599	AP000997.1	chr11	115628066	115629743	rs11215638:115495692:C:T	115624974	115624974	0	3.43e-06	-0.60068	0.127558	3091	Distal eGene eQTLs
ENSG00000110274	CEP164	chr11	117314558	117413268	rs61903740:117226773:C:A	117356057	117356057	1	1.01e-05	-0.875651	0.195796	-41500	Distal eGene eQTLs
ENSG00000109917	ZPR1	chr11	116773800	116788050	rs140489004:117496924:CTCCT:C	117626209	117626213	1	2.08e-05	-0.328496	0.0762667	191316	Distal non-eGene eQTLs
ENSG00000177103	DSCAML1	chr11	117427774	117817525	rs148247831:118274241:T:G	118403526	118403526	0	1.34e-05	16.0771	3.64773	-2372	Promoter non-eGene eQTLs
ENSG00000149582	TMEM25	chr11	118531042	118547280	rs73023341:118445585:A:G	118574870	118574870	0	3.46e-05	-1.65942	0.396183	-2480	Promoter non-eGene eQTLs
ENSG00000278376	RP11-158I9.8	chr11	118791255	118793137	11:118658194:A:G	118787485	118787485	0	4.53e-43	1.35871	0.0872902	3769	Distal eGene eQTLs
ENSG00000172269	DPAGT1	chr11	119096504	119108331	rs1064193:118965338:T:A	119094628	119094628	0	4.29e-07	-0.758099	0.147478	839	Promoter non-eGene eQTLs
ENSG00000172375	C2CD2L	chr11	119102199	119118544	rs668033:119023107:A:C	119152397	119152397	0	7.32e-13	-2.48831	0.335592	-3385	Distal non-eGene eQTLs
ENSG00000118096	IFT46	chr11	118544529	118572970	rs117642098:119078191:C:T	119207481	119207481	0	1.23e-05	-3.20836	0.724613	-1205	Promoter non-eGene eQTLs
ENSG00000154096	THY1	chr11	119417379	119424985	rs34029275:119303545:C:CT	119432835	119432835	0	6.82e-20	-9.91968	1.02979	-51057	Distal non-eGene eQTLs
ENSG00000110400	NECTIN1	chr11	119623409	119729084	rs715849:119575724:A:G	119705014	119705014	1	1.37e-06	-0.360703	0.073565	24070	Distal eGene eQTLs
ENSG00000184232	OAF	chr11	120210768	120230332	rs12792820:120055403:T:A	120184695	120184695	0	2.93e-27	-11.7039	1.00363	834	Promoter non-eGene eQTLs
ENSG00000196914	ARHGEF12	chr11	120336915	120489936	rs73008718:120205856:T:C	120335147	120335147	0	3.12e-06	6.52824	1.38033	1767	Promoter-eGene eQTLs
ENSG00000023171	GRAMD1B	chr11	123358429	123627774	rs2846310:123397869:G:A	123527161	123527161	0	1.01e-12	-0.552652	0.0750354	-168733	Distal eGene eQTLs
ENSG00000149548	CCDC15	chr11	124954122	125041489	rs3809054:124824066:C:T	124954170	124954170	1	1.62e-08	-0.390178	0.0676623	-49	Promoter-eGene eQTLs
ENSG00000187686	KRT18P59	chr11	125113162	125126781	rs10893330:124982566:T:G	125112670	125112670	0	9.17e-07	0.428062	0.0858452	-907	Promoter non-eGene eQTLs
ENSG00000150455	TIRAP	chr11	126283066	126298845	rs672806:126188405:A:G	126318510	126318510	0	5.99e-07	-0.276268	0.0544563	-14758	Distal non-eGene eQTLs
ENSG00000110080	ST3GAL4	chr11	126355641	126440344	rs2230278:126277216:C:T	126407321	126407321	0	1.12e-24	-0.695087	0.0633444	-51681	Distal eGene eQTLs
ENSG00000110080	ST3GAL4	chr11	126355641	126440344	exm969012	126408308	126408308	1	1.18e-05	-0.635388	0.143232	-52668	Distal eGene eQTLs
ENSG00000120457	KCNJ5	chr11	128891357	128921035	rs1940455	128915228	128915228	0	4.27e-17	-0.915626	0.104104	-23872	Distal eGene eQTLs
ENSG00000170322	NFRKB	chr11	129863637	129895590	rs3108962:129765453:A:G	129895558	129895558	1	4.28e-07	1.11703	0.21727	32	Promoter-eGene eQTLs
ENSG00000182667	NTM	chr11	131370479	132336822	rs10791142:131245391:A:T	131375496	131375496	0	9.89e-13	-6.64873	0.902235	-5018	Distal eGene eQTLs
ENSG00000280237	MIR4697HG	chr11	133896439	133901601	rs689380:133817037:C:T	133947142	133947142	0	7.83e-26	0.693649	0.0614717	9843	Distal non-eGene eQTLs
ENSG00000254648	RP11-713P17.4	chr11	134035833	134037107	rs879601:133907345:G:T	134037450	134037450	0	1.13e-06	-0.258604	0.0523175	-343	Promoter-eGene eQTLs
ENSG00000151503	NCAPD3	chr11	134150120	134225454	rs470631:133989665:T:A	134119770	134119770	0	1.8e-06	-0.420663	0.0868036	-50845	Distal non-eGene eQTLs
ENSG00000255545	RP11-627G23.1	chr11	134436474	134505661	11:134282292:C:T	134412398	134412398	1	7.59e-07	-1.43258	0.28508	-480	Promoter non-eGene eQTLs
ENSG00000120647	CCDC77	chr12	389274	442645	rs10774154:496695:G:A	387529	387529	0	2.99e-10	0.549	0.0849509	1744	Promoter-eGene eQTLs
ENSG00000177406	RP11-218M22.1	chr12	630892	663706	rs61916675:751514:A:G	642348	642348	0	2.49e-20	-0.663725	0.0680056	-11457	Distal eGene eQTLs
ENSG00000002016	RAD52	chr12	912078	990053	rs11571376:1059556:C:G	950390	950390	1	2.56e-08	-0.42655	0.0750661	39663	Distal eGene eQTLs
ENSG00000111247	RAD51AP1	chr12	4538799	4560048	rs17177326:4546565:G:A	4437399	4437399	0	2.12e-05	0.758301	0.176222	8215	Distal non-eGene eQTLs
ENSG00000010219	DYRK4	chr12	4562205	4615302	rs10492055:4701163:A:G	4591997	4591997	0	2e-18	-1.72952	0.188005	-29793	Distal eGene eQTLs
ENSG00000010219	DYRK4	chr12	4562205	4615302	rs1990314:4734542:T:C	4625376	4625376	1	1.39e-07	0.402095	0.0749804	-20432	Distal non-eGene eQTLs
ENSG00000047617	ANO2	chr12	5531870	5946232	rs12371081:6042669:T:C	5933503	5933503	0	3.28e-15	-55.5152	6.76987	12729	Distal eGene eQTLs
ENSG00000139200	PIANP	chr12	6693793	6700800	rs11064321:6809896:G:C	6700730	6700730	0	9.76e-07	0.830613	0.167004	70	Promoter-eGene eQTLs
ENSG00000010610	CD4	chr12	6786859	6820808	rs1045261:6929637:T:C	6820471	6820471	0	1.08e-05	-2.52993	0.567571	-33613	Distal eGene eQTLs
ENSG00000110811	P3H3	chr12	6828411	6839851	rs4963510:6946545:C:A	6837381	6837381	0	8.45e-22	-3.59741	0.353412	-8971	Distal eGene eQTLs
ENSG00000111674	ENO2	chr12	6913746	6923698	rs76214301:6955865:C:CCACA	6846701	6846701	1	1.84e-06	-0.354349	0.0731916	-18291	Distal non-eGene eQTLs
ENSG00000111669	TPI1	chr12	6867120	6870948	rs12302749	6867132	6867132	0	2.07e-20	57.2556	5.85269	-13	Promoter-eGene eQTLs
ENSG00000111676	ATN1	chr12	6924464	6942321	rs35469589:7042372:C:T	6933209	6933209	0	8.52e-19	-0.656812	0.0705487	-8746	Distal eGene eQTLs
ENSG00000272173	U47924.31	chr12	6943509	6944604	rs1044189	6943986	6943986	0	5.77e-13	0.238339	0.0319898	618	Promoter-eGene eQTLs
ENSG00000111729	CLEC4A	chr12	8123633	8138607	rs2889626	8087421	8087421	0	2.54e-05	-0.135507	0.0318052	-5210	Distal non-eGene eQTLs
ENSG00000226711	FAM66C	chr12	8180210	8216151	rs4385967:8332761:A:C	8180165	8180165	0	6.22e-14	0.520622	0.0669205	44	Promoter-eGene eQTLs
ENSG00000260423	RP13-735L24.1	chr12	9367465	9397617	rs57469308:9435632:CAT:C	9283036	9283038	1	1.41e-10	0.680005	0.103234	-5801	Distal non-eGene eQTLs
ENSG00000260423	RP13-735L24.1	chr12	9367465	9397617	rs7960104:9435639:T:C	9283043	9283043	0	2.12e-38	-0.809439	0.0560117	-5808	Distal non-eGene eQTLs
ENSG00000260423	RP13-735L24.1	chr12	9367465	9397617	rs118034173:9436298:T:C	9283702	9283702	5	1.03e-05	0.897485	0.200903	-6467	Distal non-eGene eQTLs
ENSG00000214826	DDX12P	chr12	9418674	9448229	rs12307215:9436415:A:G	9283819	9283819	1	4.51e-08	-0.396839	0.0711589	-6584	Distal non-eGene eQTLs
ENSG00000256667	KLRA1P	chr12	10588064	10599669	rs2305853:10765779:G:A	10613180	10613180	0	4.04e-08	0.495405	0.0885061	443	Promoter non-eGene eQTLs
ENSG00000060138	YBX3	chr12	10699090	10723312	rs12423741:10872827:A:G	10720228	10720228	2	3.72e-06	0.591623	0.126096	3084	Distal eGene eQTLs
ENSG00000178878	APOLD1	chr12	12725918	12829975	rs11055030:12878349:G:C	12725415	12725415	0	7.02e-07	-2.86752	0.568823	502	Promoter-eGene eQTLs
ENSG00000134548	SPX	chr12	21526308	21537377	rs11046106:21680478:C:T	21527544	21527544	0	7.2e-10	-0.450645	0.0713656	-1237	Promoter-eGene eQTLs
ENSG00000118308	LRMP	chr12	25004343	25108334	rs699032:25151127:T:C	24998193	24998193	0	9.6e-27	1.87227	0.16244	8210	Distal non-eGene eQTLs
ENSG00000060982	BCAT1	chr12	24810023	24949459	rs859145:25162703:G:A	25009769	25009769	0	8.5e-11	0.607365	0.0910583	-5427	Distal non-eGene eQTLs
ENSG00000246695	RASSF8-AS1	chr12	25939330	25959765	rs72331644:26191541:AACACAC:A	26038608	26038614	0	1.89e-08	0.999342	0.174159	-79579	Distal non-eGene eQTLs
ENSG00000064102	ASUN	chr12	26905182	26938326	rs2029310:27081873:G:A	26928940	26928940	0	2.8e-05	-1.06217	0.250631	9386	Distal eGene eQTLs
ENSG00000110888	CAPRIN2	chr12	30709553	30754951	rs11610452:30905152:G:A	30752218	30752218	0	1.55e-15	-0.619463	0.0745893	2733	Distal eGene eQTLs
ENSG00000110888	CAPRIN2	chr12	30709553	30754951	rs1485345:30907740:T:G	30754806	30754806	1	8.33e-10	-0.692988	0.110179	145	Promoter-eGene eQTLs
ENSG00000139160	ETFBKMT	chr12	31647161	31673114	rs111989534:31805971:C:T	31653037	31653037	0	1.78e-05	1.47074	0.33862	-5877	Distal eGene eQTLs
ENSG00000174718	KIAA1551	chr12	31959371	31993107	rs1259728:32030015:G:A	31877081	31877081	0	7.18e-09	0.646522	0.10933	10122	Distal non-eGene eQTLs
ENSG00000174718	KIAA1551	chr12	31959371	31993107	rs12370315:32112292:G:C	31959358	31959358	1	1.36e-10	0.45978	0.0697305	12	Promoter-eGene eQTLs
ENSG00000151746	BICD1	chr12	32106836	32383633	rs10844168:32438832:C:A	32285898	32285898	1	2.58e-08	-0.576015	0.101398	-179063	Distal eGene eQTLs
ENSG00000087470	DNM1L	chr12	32679201	32745650	rs201116273:32850917:A:AT	32697983	32697983	0	6.52e-07	5.57371	1.10236	-18783	Distal eGene eQTLs
ENSG00000278385	RP11-89H19.2	chr12	47905123	47906865	rs12298585:48282019:C:G	47888236	47888236	0	1.62e-06	0.144007	0.0295779	-5587	Distal non-eGene eQTLs
ENSG00000269514	RP11-370I10.12	chr12	48198388	48202031	rs4760696:48591976:C:A	48198193	48198193	1	5.31e-05	0.286067	0.0700181	194	Promoter-eGene eQTLs
ENSG00000134285	FKBP11	chr12	48921519	48926474	rs2293449:49318546:G:A	48924763	48924763	0	7.9e-32	-1.34223	0.104579	1711	Promoter-eGene eQTLs
ENSG00000139537	CCDC65	chr12	48904111	48931840	rs2070940:49351493:C:G	48957710	48957710	0	2.33e-07	-0.455133	0.0865025	-345	Promoter non-eGene eQTLs
ENSG00000167553	TUBA1C	chr12	49188737	49274603	rs1476138:49525380:A:G	49131597	49131597	0	4.44e-17	1.19237	0.135649	-200	Promoter non-eGene eQTLs
ENSG00000178449	COX14	chr12	50111980	50120457	rs3832812:50532188:G:GA	50138405	50138405	0	8.09e-07	-0.821385	0.163877	-26208	Distal non-eGene eQTLs
ENSG00000110925	CSRNP2	chr12	51061206	51083664	rs77706234:51475604:C:A	51081821	51081821	0	1.2e-07	2.52782	0.468884	1843	Promoter-eGene eQTLs
ENSG00000139567	ACVRL1	chr12	51906909	51923361	rs143960014:52285090:G:A	51891306	51891306	0	1.73e-30	2.93404	0.23481	-3346	Distal non-eGene eQTLs
ENSG00000111077	TNS2	chr12	53046970	53064372	rs11610008:53440582:C:T	53046798	53046798	0	1.27e-13	2.4774	0.322794	171	Promoter-eGene eQTLs
ENSG00000257337	RP11-983P16.4	chr12	53014597	53054438	rs11170387:53448737:G:T	53054953	53054953	0	2.51e-14	0.625436	0.0790576	-515	Promoter-eGene eQTLs
ENSG00000182544	MFSD5	chr12	53251252	53254405	rs11342988:53637336:TA:T	53243552	53243553	1	8.27e-09	0.411086	0.0698174	-1663	Promoter non-eGene eQTLs
ENSG00000182544	MFSD5	chr12	53251252	53254405	rs148152366:53645921:C:T	53252137	53252137	0	2.67e-16	1.33509	0.156201	-886	Promoter-eGene eQTLs
ENSG00000283536	RP11-624J6.2	chr12	53241890	53245134	rs56297209:53646327:G:C	53252543	53252543	0	5.7e-08	1.49667	0.270512	-1292	Promoter non-eGene eQTLs
ENSG00000205352	PRR13	chr12	53441606	53446645	rs12818938:53783182:T:G	53389398	53389398	0	2.19e-08	-1.5678	0.274534	-9222	Distal non-eGene eQTLs
ENSG00000135390	ATP5G2	chr12	53632727	53677408	rs3892761:54070445:A:T	53676661	53676661	0	5.95e-84	17.979	0.718296	747	Promoter-eGene eQTLs
ENSG00000172819	RARG	chr12	53210568	53232980	12:54582091:TAATAATAATAATAATAATAATAATAATAATA:T	54188307	54188338	0	4.03e-05	-0.579094	0.139485	701	Promoter non-eGene eQTLs
ENSG00000139531	SUOX	chr12	55997181	56006641	rs705700:56389293:T:C	55995509	55995509	0	7.49e-38	-2.20767	0.154182	1671	Promoter-eGene eQTLs
ENSG00000197728	RPS26	chr12	56041854	56044675	rs1131017:56435929:C:G	56042145	56042145	0	3.52e-131	-35.9758	0.973609	-292	Promoter-eGene eQTLs
ENSG00000258056	RP11-644F5.11	chr12	55729105	55730852	rs71081341:56678681:CA:C	56284897	56284898	0	2.4e-05	-0.459712	0.107558	15495	Distal non-eGene eQTLs
ENSG00000198056	PRIM1	chr12	56731597	56752373	rs3782232:57116249:G:A	56722465	56722465	0	1.04e-06	-0.97226	0.196003	9163	Distal non-eGene eQTLs
ENSG00000166881	NEMP1	chr12	57055644	57088063	rs62621200:57472544:C:T	57078761	57078761	0	1.44e-42	16.4841	1.06718	9302	Distal eGene eQTLs
ENSG00000166888	STAT6	chr12	57095409	57132139	rs324014:57510309:T:C	57116526	57116526	0	1.03e-07	0.935179	0.172551	15613	Distal eGene eQTLs
ENSG00000123297	TSFM	chr12	57782590	57808071	rs6581155	57784379	57784379	0	9.9e-24	-1.13734	0.106136	-1790	Promoter-eGene eQTLs
ENSG00000111110	PPM1H	chr12	62643983	62935037	rs699584:63301808:C:T	62908028	62908028	0	3.77e-08	-5.06396	0.902639	27009	Distal eGene eQTLs
ENSG00000127337	YEATS4	chr12	69359704	69390796	rs7136238:69752509:G:T	69358729	69358729	0	5.76e-18	-0.602085	0.0664481	974	Promoter-eGene eQTLs
ENSG00000127328	RAB3IP	chr12	69738682	69823204	rs111260250:70133856:G:A	69740076	69740076	2	2.42e-06	-1.2473	0.260746	-1395	Promoter-eGene eQTLs
ENSG00000135643	KCNMB4	chr12	70366277	70434292	rs139496981:70935682:ATGC:A	70541902	70541905	0	2.62e-11	0.455753	0.0664378	-73822	Distal non-eGene eQTLs
ENSG00000253719	ATXN7L3B	chr12	74537828	74545430	rs3832833:74934361:TA:T	74540581	74540582	0	2.63e-60	-1.31558	0.0672589	-2754	Distal eGene eQTLs
ENSG00000058272	PPP1R12A	chr12	79773564	79935460	rs12310582:79299233:T:C	78905453	78905453	0	5.21e-06	-1.20692	0.261307	-41460	Distal non-eGene eQTLs
ENSG00000271614	LINC00936	chr12	89708960	89712590	rs11105379:90095173:T:C	89701396	89701396	0	8.81e-05	0.644529	0.162695	7563	Distal eGene eQTLs
ENSG00000136014	USP44	chr12	95516561	95551490	rs11108100:95940716:T:C	95546940	95546940	1	5.58e-09	-0.466265	0.0782517	4550	Distal eGene eQTLs
ENSG00000136014	USP44	chr12	95516561	95551490	rs139776310:95942550:C:G	95548774	95548774	2	3.73e-06	0.610889	0.130215	2716	Distal eGene eQTLs
ENSG00000139343	SNRPF	chr12	95858929	95903828	rs79232656:96254577:C:T	95860799	95860799	0	2.08e-07	1.0844	0.20521	-1871	Promoter-eGene eQTLs
ENSG00000111144	LTA4H	chr12	96000829	96043520	rs2247570:96422377:T:C	96028599	96028599	0	5.68e-16	0.589497	0.0698117	14921	Distal eGene eQTLs
ENSG00000257489	RP11-175P13.3	chr12	100173197	100199783	rs10860564:100584482:T:C	100190704	100190704	0	4.59e-08	0.553963	0.0993907	9079	Distal eGene eQTLs
ENSG00000171759	PAH	chr12	102836886	102958410	rs11442766:103344728:G:GT	102950950	102950950	0	1e-09	0.894049	0.142855	7460	Distal eGene eQTLs
ENSG00000111696	NT5DC3	chr12	103770454	103841197	rs703616	103626454	103626454	1	8.01e-19	0.608415	0.0652942	-39181	Distal non-eGene eQTLs
ENSG00000111696	NT5DC3	chr12	103770454	103841197	rs17034648:104219000:C:T	103825222	103825222	0	2.28e-29	-1.12081	0.0917983	15975	Distal eGene eQTLs
ENSG00000166598	HSP90B1	chr12	103930108	103953645	rs74375989:104326939:AC:A	103933161	103933162	0	7.48e-08	-23.0218	4.20015	-3054	Distal eGene eQTLs
ENSG00000120820	GLT8D2	chr12	103988985	104064183	rs117697463:104443517:A:G	104049739	104049739	0	3.04e-07	0.291534	0.0559624	14444	Distal eGene eQTLs
ENSG00000136026	CKAP4	chr12	106237878	106304279	rs61942136:106649224:C:T	106255446	106255446	0	3.74e-34	-5.84623	0.435815	48833	Distal eGene eQTLs
ENSG00000277715	RP11-651L5.3	chr12	106250760	106252786	rs61942136:106649224:C:T	106255446	106255446	0	1.28e-08	-0.476129	0.0819628	48833	Distal non-eGene eQTLs
ENSG00000110887	DAO	chr12	108858933	108901043	rs7980427:109281310:G:A	108887534	108887534	0	2.61e-22	-1.2527	0.121355	-28602	Distal eGene eQTLs
ENSG00000089022	MAPKAPK5	chr12	111841979	111902238	rs61309313:112544195:T:TA	112106391	112106391	0	3.32e-25	-5.41332	0.486986	2631	Distal non-eGene eQTLs
ENSG00000258102	MAP1LC3B2	chr12	116548106	116576448	rs112608219:116602950:A:G	116165145	116165145	0	3.29e-05	0.409383	0.0974775	112193	Distal non-eGene eQTLs
ENSG00000089220	PEBP1	chr12	118135859	118145584	rs138948268:118652551:CTT:C	118214746	118214748	0	8.16e-15	-11.9419	1.4795	158199	Distal non-eGene eQTLs
ENSG00000275759	RP11-131L12.3	chr12	118428282	118428870	12:118722814:T:TA	118285009	118285009	1	8.92e-06	-0.456538	0.101457	87936	Distal non-eGene eQTLs
ENSG00000111707	SUDS3	chr12	118376381	118418031	rs17512644:118797768:G:A	118359963	118359963	0	3.12e-19	4.06483	0.430638	12982	Distal non-eGene eQTLs
ENSG00000257218	GATC	chr12	120446439	120463749	rs73403923:120921992:C:T	120484189	120484189	0	1.94e-42	1.30508	0.0846571	-14339	Distal non-eGene eQTLs
ENSG00000157895	C12orf43	chr12	121000487	121016502	rs73214155:121454342:T:A	121016539	121016539	0	6.98e-15	1.19121	0.147175	-37	Promoter-eGene eQTLs
ENSG00000139725	RHOF	chr12	121777755	121803403	rs1168663:122234089:T:A	121796183	121796183	0	3.95e-14	0.814172	0.103772	7220	Distal eGene eQTLs
ENSG00000130783	CCDC62	chr12	122774328	122827528	12:123236748:A:AGAAG	122752201	122752201	0	2.06e-06	-0.876429	0.181919	573	Promoter non-eGene eQTLs
ENSG00000150967	ABCB9	chr12	122920952	122981649	rs59131741:123536456:C:CT	123051909	123051909	0	2.34e-06	-0.51969	0.108476	98106	Distal non-eGene eQTLs
ENSG00000051825	MPHOSPH9	chr12	123152321	123244014	rs1727294:123616514:A:G	123131967	123131967	0	5.88e-52	-6.37884	0.361627	18048	Distal non-eGene eQTLs
ENSG00000256092	RP13-942N8.1	chr12	123363869	123366113	rs9669069:123835678:A:G	123351131	123351131	1	1.08e-10	1.04733	0.157948	13712	Distal non-eGene eQTLs
ENSG00000256092	RP13-942N8.1	chr12	123363869	123366113	rs112223429:123849523:C:T	123364976	123364976	0	1.22e-08	1.67661	0.288169	-1108	Promoter-eGene eQTLs
ENSG00000111364	DDX55	chr12	123602078	123620941	rs76100851:124067280:G:T	123582733	123582733	0	5.48e-25	-1.05862	0.0957395	1798	Promoter non-eGene eQTLs
ENSG00000111358	GTF2H3	chr12	123633740	123662606	rs7953876:124070843:T:C	123586296	123586296	0	6.9e-08	-0.867506	0.157823	-1765	Promoter non-eGene eQTLs
ENSG00000196498	NCOR2	chr12	124324416	124567589	rs906304:124926143:G:A	124441597	124441597	1	6.7e-06	-0.479504	0.105079	125992	Distal eGene eQTLs
ENSG00000250091	DNAH10OS	chr12	123926425	123934984	rs4765151:124982862:G:T	124498316	124498316	1	1.55e-05	-0.46916	0.107234	69273	Distal non-eGene eQTLs
ENSG00000181234	TMEM132C	chr12	128267404	128707915	rs202048932:128754366:T:TA	128269821	128269821	0	7.62e-06	-0.732783	0.161588	-2418	Promoter-eGene eQTLs
ENSG00000279500	RP11-21K12.2	chr12	128813187	128814750	rs4760533:129297651:C:T	128813106	128813106	0	1.2e-09	-0.4221	0.067779	1644	Promoter-eGene eQTLs
ENSG00000247077	PGAM5	chr12	132710820	132722734	rs11146975:133194786:T:C	132618200	132618200	0	2.63e-08	0.639806	0.112696	580	Promoter non-eGene eQTLs
ENSG00000072609	CHFR	chr12	132822188	132956304	rs61952781:133412428:A:G	132835842	132835842	0	2.13e-10	0.562763	0.086331	120462	Distal eGene eQTLs
ENSG00000090615	GOLGA3	chr12	132768910	132828858	rs61952781:133412428:A:G	132835842	132835842	0	1.29e-22	-31.2198	2.9996	-342	Promoter non-eGene eQTLs
ENSG00000250790	RP11-46H11.3	chr12	132911471	132914732	rs72624274:133414251:C:T	132837665	132837665	0	4.21e-10	0.410011	0.0640106	-2165	Promoter non-eGene eQTLs
ENSG00000127863	TNFRSF19	chr13	23570371	23676104	rs111526441:24153369:A:T	23579230	23579230	0	1.4e-07	-2.92047	0.544765	-8860	Distal eGene eQTLs
ENSG00000139496	NUP58	chr13	25301525	25349800	exm1058910	25301873	25301873	0	2.6e-05	2.05201	0.482228	-349	Promoter-eGene eQTLs
ENSG00000132970	WASF3	chr13	26557704	26688948	rs541202:27138389:A:G	26564252	26564252	1	4.97e-07	0.411463	0.0805041	-6549	Distal eGene eQTLs
ENSG00000139508	SLC46A3	chr13	28700065	28718970	rs1306892:29278953:C:T	28704816	28704816	1	1.11e-05	0.380032	0.0853897	14154	Distal eGene eQTLs
ENSG00000139508	SLC46A3	chr13	28700065	28718970	rs66964313:29294042:G:C	28719905	28719905	0	3.61e-59	1.05592	0.0547136	-935	Promoter-eGene eQTLs
ENSG00000139514	SLC7A1	chr13	29509411	29595688	rs75843331:30172048:C:T	29597911	29597911	0	2.81e-06	5.46151	1.1493	-2223	Promoter-eGene eQTLs
ENSG00000102781	KATNAL1	chr13	30202631	30307484	rs6490453:30881573:T:C	30307436	30307436	0	4.62e-15	-0.526141	0.0645406	48	Promoter-eGene eQTLs
ENSG00000180660	MAB21L1	chr13	35474183	35477209	rs1031776:36047374:G:A	35473237	35473237	0	2.15e-07	6.49131	1.23005	3972	Distal eGene eQTLs
ENSG00000172915	NBEA	chr13	34942288	35673022	rs9574068:36087418:C:T	35513281	35513281	0	2.11e-13	0.747692	0.0983778	-570994	Distal eGene eQTLs
ENSG00000120669	SOHLH2	chr13	36168209	36214615	rs11840549:36872249:A:G	36298112	36298112	0	9.7e-49	1.06012	0.0627528	-272	Promoter non-eGene eQTLs
ENSG00000120690	ELF1	chr13	40931921	41061440	13:41362713:G:A	40788577	40788577	0	2.37e-05	1.61635	0.377868	835	Promoter non-eGene eQTLs
ENSG00000023516	AKAP11	chr13	42272154	42323267	rs2122242:42848853:G:A	42274717	42274717	0	2.93e-05	-5.68321	1.34431	-2564	Distal eGene eQTLs
ENSG00000120675	DNAJC15	chr13	43023204	43114224	rs17553284:43597706:C:T	43023570	43023570	0	8.17e-73	-5.87923	0.262052	-367	Promoter-eGene eQTLs
ENSG00000102804	TSC22D1	chr13	44432144	44577147	rs2166303:44560675:T:A	43986539	43986539	0	6.15e-06	0.318787	0.0695704	-102739	Distal non-eGene eQTLs
ENSG00000102547	CAB39L	chr13	49308651	49444126	rs9535244:50012407:C:T	49438271	49438271	0	8.19e-11	-0.464839	0.0696256	5855	Distal eGene eQTLs
ENSG00000123179	EBPL	chr13	49660724	49691475	rs9568308:50265238:C:T	49691102	49691102	0	3.01e-20	-1.01356	0.104104	373	Promoter-eGene eQTLs
ENSG00000123179	EBPL	chr13	49660724	49691475	rs3809325:50266109:T:C	49691973	49691973	1	3.97e-09	-0.408117	0.0678083	-498	Promoter-eGene eQTLs
ENSG00000204977	TRIM13	chr13	49995889	50020481	rs372935601:50604146:CAA:C	50030010	50030012	0	8.42e-18	2.15278	0.238905	95710	Distal non-eGene eQTLs
ENSG00000236778	INTS6-AS1	chr13	51452368	51552364	13:52027532:C:T	51453396	51453396	1	3.17e-07	1.43145	0.275242	-1029	Promoter-eGene eQTLs
ENSG00000253710	ALG11	chr13	52012399	52029664	rs73184330:52571856:G:C	51997720	51997720	0	2.62e-13	1.01257	0.133795	14405	Distal non-eGene eQTLs
ENSG00000281106	RP11-327P2.7	chr13	51813348	51845175	rs73500160:52693103:C:T	52118967	52118967	0	4.38e-06	-0.95241	0.204526	10111	Distal non-eGene eQTLs
ENSG00000136111	TBC1D4	chr13	75284666	75482114	rs9565167:76056856:T:A	75482720	75482720	1	3.72e-05	-0.55806	0.133793	-606	Promoter-eGene eQTLs
ENSG00000183098	GPC6	chr13	93226843	94407401	rs55667930:95952254:C:G	95300000	95300000	1	6.8e-06	-0.960131	0.210546	1446	Promoter non-eGene eQTLs
ENSG00000247400	DNAJC3-AS1	chr13	95648734	95676925	rs1197891:96295631:T:A	95643377	95643377	0	1.06e-19	1.73276	0.180933	1326	Promoter non-eGene eQTLs
ENSG00000102580	DNAJC3	chr13	95677140	95794989	rs9561963:96472225:T:C	95819971	95819971	0	4.49e-34	-3.10307	0.231658	233511	Distal non-eGene eQTLs
ENSG00000152767	FARP1	chr13	98142563	98455176	rs12868356:98795089:G:A	98142835	98142835	0	1.92e-09	-0.46735	0.0760409	-273	Promoter-eGene eQTLs
ENSG00000175198	PCCA	chr13	100089016	100530437	rs35996077:100743392:T:TG	100091138	100091138	0	3.43e-08	-0.878611	0.15611	-2123	Promoter-eGene eQTLs
ENSG00000134897	BIVM	chr13	102799050	102841535	rs67351149:103452915:GTC:G	102800565	102800567	0	1.75e-06	0.982199	0.202421	-1516	Promoter-eGene eQTLs
ENSG00000274718	RP11-346C4.3	chr13	107870384	107873372	rs9559179:108520925:C:G	107868577	107868577	0	2.2e-05	-0.12145	0.0282816	-1842	Promoter non-eGene eQTLs
ENSG00000134871	COL4A2	chr13	110305813	110513027	rs7990017:110959705:C:T	110307358	110307358	0	7.1e-07	-0.853762	0.169441	-1546	Promoter-eGene eQTLs
ENSG00000139832	RAB20	chr13	110523067	110561733	rs66487459:111149960:CAG:C	110497613	110497615	1	4.7e-08	-0.401539	0.072103	-191801	Distal non-eGene eQTLs
ENSG00000277767	RP11-365P13.5	chr13	110916005	110917827	rs28364778:111568187:T:A	110915840	110915840	0	2.03e-19	-0.739195	0.0778586	164	Promoter-eGene eQTLs
ENSG00000235280	MCF2L-AS1	chr13	112967485	112968824	rs3011549:113634937:A:C	112980623	112980623	0	2.36e-11	-0.529315	0.076969	-86245	Distal non-eGene eQTLs
ENSG00000267868	RP11-120K24.3	chr13	112964836	112966131	rs9549328:113636156:C:T	112981842	112981842	1	1.33e-05	0.366898	0.083209	-87464	Distal non-eGene eQTLs
ENSG00000150401	DCUN1D2	chr13	113455820	113490952	rs7333908:114146337:T:G	113492022	113492022	0	6.31e-07	1.67106	0.330065	-1070	Promoter-eGene eQTLs
ENSG00000185989	RASA3	chr13	113977784	114132611	rs76125116:114887811:G:A	114122336	114122336	1	6.52e-06	-0.450707	0.0986324	10275	Distal eGene eQTLs
ENSG00000130177	CDC16	chr13	114234888	114272723	rs58330445:115083787:AT:A	114318312	114318313	1	8.94e-05	0.615284	0.155458	-3799	Distal non-eGene eQTLs
ENSG00000169062	UPF3A	chr13	114281585	114305817	rs71950872:115084293:C:CT	114318818	114318818	0	2.42e-06	-3.1564	0.659799	-4305	Distal non-eGene eQTLs
ENSG00000129566	TEP1	chr14	20365668	20413429	rs1713434:20881527:T:C	20413368	20413368	0	3.72e-12	-1.3054	0.182153	61	Promoter-eGene eQTLs
ENSG00000092200	RPGRIP1	chr14	21287940	21351301	rs10131045:21685173:C:T	21217014	21217014	0	6e-10	-18.818	2.96561	52480	Distal non-eGene eQTLs
ENSG00000155463	OXA1L	chr14	22766523	22773041	rs3764164:23237593:G:A	22768384	22768384	0	3.9e-13	3.84882	0.512551	-1862	Promoter-eGene eQTLs
ENSG00000172590	MRPL52	chr14	22829880	22835037	rs4982683:23286977:A:G	22817768	22817768	1	1.34e-05	0.329664	0.0747713	12052	Distal non-eGene eQTLs
ENSG00000172590	MRPL52	chr14	22829880	22835037	rs1004030:23305649:T:C	22836440	22836440	0	7.26e-06	-0.321532	0.0707356	117	Promoter non-eGene eQTLs
ENSG00000100461	RBM23	chr14	22893207	22919184	exm1089307	22982136	22982136	0	3.7e-12	-1.58736	0.221472	122	Promoter non-eGene eQTLs
ENSG00000279656	RP11-298I3.6	chr14	23023084	23024217	rs11846575:23491284:C:G	23022075	23022075	0	4.62e-61	-1.14653	0.0581018	2142	Promoter-eGene eQTLs
ENSG00000100804	PSMB5	chr14	23016544	23035230	rs11846575:23491284:C:G	23022075	23022075	0	6.27e-24	0.773736	0.0718403	13155	Distal eGene eQTLs
ENSG00000100804	PSMB5	chr14	23016544	23035230	exm1089413	23034812	23034812	1	5.21e-06	-0.669338	0.144919	418	Promoter-eGene eQTLs
ENSG00000157306	RP11-66N24.4	chr14	23511761	23560778	rs28403575:24025340:C:T	23556131	23556131	0	1.04e-12	1.38775	0.188519	-44371	Distal eGene eQTLs
ENSG00000100884	CPNE6	chr14	24070838	24078100	rs62000824:24549030:C:G	24079821	24079821	0	2.3e-09	-3.40106	0.556247	-8984	Distal eGene eQTLs
ENSG00000100968	NFATC4	chr14	24365674	24379604	rs28365903:24836815:C:G	24367609	24367609	0	7.89e-06	-1.77449	0.391968	-1936	Promoter-eGene eQTLs
ENSG00000139899	CBLN3	chr14	24426533	24430954	rs10143703	24429149	24429149	0	3.12e-08	0.440422	0.0780146	1805	Promoter-eGene eQTLs
ENSG00000100441	KHNYN	chr14	24429287	24441834	rs3825588:24900231:G:C	24431025	24431025	1	1.17e-09	-0.646697	0.10377	-1739	Promoter-eGene eQTLs
ENSG00000092108	SCFD1	chr14	30622113	30735812	rs229143:31091758:T:A	30622552	30622552	0	1.34e-06	0.966702	0.196959	-440	Promoter-eGene eQTLs
ENSG00000165379	LRFN5	chr14	41607571	41904549	rs61990289:42076434:C:T	41607231	41607231	0	7.33e-11	0.738266	0.110282	339	Promoter-eGene eQTLs
ENSG00000100442	FKBP3	chr14	45115601	45135319	exm2267704	44989121	44989121	0	3.61e-06	3.56513	0.75879	-26913	Distal non-eGene eQTLs
ENSG00000244270	RPL32P29	chr14	49577393	49577794	rs192623780:50066542:G:C	49599824	49599824	0	1.39e-09	0.232699	0.03752	-1127	Promoter non-eGene eQTLs
ENSG00000165502	RPL36AL	chr14	49618520	49620685	rs1952013:50087357:C:G	49620639	49620639	0	7.67e-44	5.8372	0.370673	46	Promoter-eGene eQTLs
ENSG00000165506	DNAAF2	chr14	49625175	49635230	exm1099738	49634964	49634964	0	6.73e-08	-0.570405	0.103685	266	Promoter-eGene eQTLs
ENSG00000125375	ATP5S	chr14	50312327	50335558	rs12892752:50779346:C:T	50312628	50312628	1	8.52e-07	-0.34503	0.0689827	-302	Promoter-eGene eQTLs
ENSG00000100490	CDKL1	chr14	50329405	50416461	rs77609075:50863244:T:C	50396526	50396526	0	7.77e-11	0.440961	0.0659641	19935	Distal eGene eQTLs
ENSG00000151748	SAV1	chr14	50632059	50668331	rs12433935:51135226:A:C	50668508	50668508	0	4.96e-13	-0.707605	0.0946882	-177	Promoter-eGene eQTLs
ENSG00000100526	CDKN3	chr14	54396850	54420218	rs1884014:54864963:C:G	54398245	54398245	0	2.49e-34	-0.444177	0.033004	-1396	Promoter-eGene eQTLs
ENSG00000020577	SAMD4A	chr14	54567098	54793315	rs8015391:54954582:A:G	54487864	54487864	0	7.55e-06	-0.997688	0.219901	1332	Promoter non-eGene eQTLs
ENSG00000180008	SOCS4	chr14	55027231	55049488	rs77678033:55494090:G:A	55027372	55027372	0	2.25e-06	-2.02047	0.421013	-142	Promoter-eGene eQTLs
ENSG00000126777	KTN1	chr14	55559073	55701526	rs11851435:55921561:C:G	55454843	55454843	0	3.31e-10	-0.441714	0.068531	1883	Promoter non-eGene eQTLs
ENSG00000243388	RPL3P3	chr14	56978410	56979621	rs709970:57392834:C:T	56926116	56926116	0	4.78e-14	0.244273	0.0312446	-112933	Distal non-eGene eQTLs
ENSG00000100567	PSMA3	chr14	58244832	58272012	rs58517487:58763221:CAGAG:C	58296503	58296507	1	5.35e-06	0.493906	0.107071	1631	Promoter non-eGene eQTLs
ENSG00000126790	L3HYPDH	chr14	59460364	59484430	rs1253097:59943468:G:T	59476750	59476750	0	2.46e-32	-0.868941	0.0670374	7680	Distal eGene eQTLs
ENSG00000100614	PPM1A	chr14	60245753	60299087	rs61992495:60745330:T:C	60278612	60278612	0	1.51e-06	6.49417	1.32991	-32860	Distal eGene eQTLs
ENSG00000089775	ZBTB25	chr14	64449107	64505213	rs142948421:65231365:C:A	64764647	64764647	0	8.55e-08	6.12833	1.12328	115236	Distal non-eGene eQTLs
ENSG00000139998	RAB15	chr14	64945815	64972776	rs3215788:65453493:TG:T	64986775	64986776	0	2.6e-17	2.17131	0.245027	-55	Promoter non-eGene eQTLs
ENSG00000198133	TMEM229B	chr14	67447085	67533739	rs10136867:67924865:A:C	67458148	67458148	1	2.65e-10	0.556558	0.085854	75591	Distal eGene eQTLs
ENSG00000100564	PIGH	chr14	67581956	67600287	rs4902498:68065989:A:G	67599272	67599272	0	1.54e-21	3.044	0.301225	1015	Promoter-eGene eQTLs
ENSG00000100568	VTI1B	chr14	67647076	67674831	rs3215578:68118420:TA:T	67651703	67651704	0	1.09e-06	0.469816	0.094889	23128	Distal eGene eQTLs
ENSG00000072042	RDH11	chr14	67676802	67695814	rs12432548:68124341:C:A	67657624	67657624	0	6.17e-08	4.75464	0.861692	-413	Promoter non-eGene eQTLs
ENSG00000100568	VTI1B	chr14	67647076	67674831	rs8018479:68199232:T:C	67732515	67732515	1	5.95e-05	-0.301072	0.0741931	-30629	Distal non-eGene eQTLs
ENSG00000139988	RDH12	chr14	67701887	67734452	rs17104621:68208677:A:G	67741960	67741960	0	7.38e-32	58.098	4.524	74630	Distal non-eGene eQTLs
ENSG00000133985	TTC9	chr14	70641788	70675360	rs34906255:71104786:C:T	70638069	70638069	0	1.41e-22	0.813599	0.0782546	3718	Distal eGene eQTLs
ENSG00000245466	CTD-2540L5.6	chr14	70608799	70641298	rs1572678:71107942:C:T	70641225	70641225	0	3.92e-21	0.819201	0.0820006	73	Promoter-eGene eQTLs
ENSG00000279026	RP3-414A15.12	chr14	73580695	73582918	rs740976:73255917:A:G	72789209	72789209	3	5.14e-05	0.434636	0.106175	104907	Distal non-eGene eQTLs
ENSG00000184227	ACOT1	chr14	73537115	73543794	rs11626972:74033594:A:G	73566890	73566890	1	9.65e-14	0.56323	0.0729985	730	Promoter non-eGene eQTLs
ENSG00000279026	RP3-414A15.12	chr14	73580695	73582918	rs34209744:74035056:G:GA	73568352	73568352	1	8.53e-08	-0.479472	0.0878772	-732	Promoter non-eGene eQTLs
ENSG00000259065	RP5-1021I20.1	chr14	73787361	73803270	rs12587785:74256119:G:A	73789416	73789416	1	2.24e-06	0.352984	0.0735288	-2056	Promoter-eGene eQTLs
ENSG00000259065	RP5-1021I20.1	chr14	73787361	73803270	rs12887033:74292128:C:T	73825425	73825425	0	7.8e-58	1.31853	0.0694238	4710	Distal non-eGene eQTLs
ENSG00000119616	FCF1	chr14	74713145	74738620	rs11628616:74712623:G:A	74245920	74245920	0	2.4e-05	-1.43259	0.335209	-6448	Distal non-eGene eQTLs
ENSG00000183379	SYNDIG1L	chr14	74405894	74426102	rs730384:74889870:G:A	74423167	74423167	0	8.82e-07	0.354876	0.071054	2935	Distal eGene eQTLs
ENSG00000119699	TGFB3	chr14	75958100	75982991	rs146047341:76448921:G:A	75982578	75982578	0	3.41e-10	-1.03783	0.161138	413	Promoter-eGene eQTLs
ENSG00000119650	IFT43	chr14	75902137	76084585	rs35348551:76543562:G:GCT	76077219	76077219	0	2.73e-30	-1.69639	0.136309	-175083	Distal eGene eQTLs
ENSG00000273729	RP11-7F17.8	chr14	77028087	77031572	rs148680952:77568267:A:G	77101924	77101924	0	3.41e-08	2.13481	0.379249	-3827	Distal non-eGene eQTLs
ENSG00000100577	GSTZ1	chr14	77320885	77331597	rs8008449:77780784:G:A	77314441	77314441	0	6.49e-25	0.741748	0.0672016	6443	Distal eGene eQTLs
ENSG00000100591	AHSA1	chr14	77457871	77469474	rs60639091:77856345:A:AT	77390002	77390002	0	4.18e-07	-3.34282	0.649642	-13313	Distal non-eGene eQTLs
ENSG00000100577	GSTZ1	chr14	77320885	77331597	rs17824238:77928080:C:T	77461737	77461737	1	8.54e-07	0.737414	0.147448	-3867	Distal non-eGene eQTLs
ENSG00000185070	FLRT2	chr14	85530145	85654426	rs2746997:86067774:G:A	85601430	85601430	0	1.04e-05	1.39594	0.312677	-71286	Distal eGene eQTLs
ENSG00000042088	TDP1	chr14	89954940	90044768	rs942190	89956320	89956320	0	3.63e-26	0.707022	0.0621671	-1381	Promoter-eGene eQTLs
ENSG00000275198	RP11-471B22.3	chr14	90383366	90387973	rs7156456:90864608:T:G	90398264	90398264	0	5.39e-06	0.168948	0.0366396	-1762	Promoter non-eGene eQTLs
ENSG00000188488	SERPINA5	chr14	94561443	94593120	rs8005135:95048462:G:A	94582125	94582125	0	3.32e-10	-8.11953	1.25981	-20683	Distal eGene eQTLs
ENSG00000165959	CLMN	chr14	95181941	95319906	rs10130428:95659768:A:G	95193431	95193431	0	9.15e-09	0.566363	0.0964858	126475	Distal eGene eQTLs
ENSG00000259026	RP11-907D1.1	chr14	97110417	97119247	rs72694270:97585529:T:C	97119192	97119192	0	2.45e-17	1.0349	0.11668	55	Promoter-eGene eQTLs
ENSG00000182218	HHIPL1	chr14	99645111	99680569	rs2144800	99619113	99619113	1	2.01e-05	0.304192	0.0704887	-14557	Distal non-eGene eQTLs
ENSG00000066629	EML1	chr14	99737694	99942060	rs11625037:100221324:C:G	99754987	99754987	0	1.09e-11	9.88438	1.41232	-17294	Distal eGene eQTLs
ENSG00000022976	ZNF839	chr14	102317378	102342702	rs11404221:102783599:T:TG	102317262	102317262	0	1.11e-11	1.34244	0.191902	115	Promoter-eGene eQTLs
ENSG00000166166	TRMT61A	chr14	103529185	103537073	rs2756119:104001517:G:A	103535180	103535180	0	3.31e-06	-0.297751	0.0631203	-5996	Distal eGene eQTLs
ENSG00000256500	RP11-73M18.2	chr14	103562963	103685924	rs60249782:104061284:G:A	103594947	103594947	0	2.99e-13	2.36732	0.313598	-31985	Distal eGene eQTLs
ENSG00000261377	PDCD6IPP2	chr15	28789665	28859007	rs60936563:29078333:C:CT	28833187	28833187	0	3.42e-05	-0.545539	0.130166	-43523	Distal eGene eQTLs
ENSG00000250007	RP11-814P5.1	chr15	34755085	34812923	rs647621:35052371:C:T	34760170	34760170	1	3.29e-05	0.409024	0.0973875	-5086	Distal eGene eQTLs
ENSG00000159251	ACTC1	chr15	34788097	34796139	rs640249	34799485	34799485	0	4.72e-10	-4.40087	0.689154	-44401	Distal non-eGene eQTLs
ENSG00000128829	EIF2AK4	chr15	39934147	40035591	rs7321:40330564:C:T	40038363	40038363	2	2.89e-05	0.570187	0.134764	825	Promoter non-eGene eQTLs
ENSG00000137843	PAK6	chr15	40238760	40277487	rs73391328:40531147:A:T	40238946	40238946	0	3.32e-05	0.409637	0.0975795	-187	Promoter-eGene eQTLs
ENSG00000259330	INAFM2	chr15	40325217	40326715	rs2289333	40325008	40325008	0	4.85e-11	-0.778796	0.115186	208	Promoter-eGene eQTLs
ENSG00000137877	SPTBN5	chr15	41848145	41894077	rs1197691:42175104:G:C	41882906	41882906	0	3.46e-07	-15.8861	3.06485	11171	Distal eGene eQTLs
ENSG00000103966	EHD4	chr15	41895940	41972578	rs34833430:42205706:C:CT	41913508	41913508	0	3.13e-12	-1.82259	0.253372	59070	Distal eGene eQTLs
ENSG00000180979	LRRC57	chr15	42537821	42548802	rs58042601:42867649:C:A	42575451	42575451	0	1.48e-21	9.11183	0.901266	208	Promoter non-eGene eQTLs
ENSG00000166762	CATSPER2	chr15	43628504	43668118	rs71431892:43753058:C:CA	43460860	43460860	0	2.94e-15	-0.712935	0.0867759	49868	Distal non-eGene eQTLs
ENSG00000223572	CKMT1A	chr15	43692887	43699222	rs7181665:43810916:G:C	43518718	43518718	0	3.78e-11	0.634807	0.0933372	-7760	Distal non-eGene eQTLs
ENSG00000166763	STRCP1	chr15	43699489	43718184	rs7181665:43810916:G:C	43518718	43518718	0	2.61e-20	0.864394	0.0886199	-7760	Distal non-eGene eQTLs
ENSG00000179523	EIF3J-AS1	chr15	44527258	44536923	15:44087760:C:G	43795562	43795562	0	0.000115245	1.11055	0.285157	-1803	Promoter non-eGene eQTLs
ENSG00000205771	CATSPER2P1	chr15	43726919	43747094	rs557886:44119446:C:G	43827248	43827248	1	9.01e-07	-1.12165	0.224771	-2446	Promoter non-eGene eQTLs
ENSG00000186417	GLDN	chr15	51341630	51408013	rs28490942:51559845:G:C	51267648	51267648	0	2.22e-05	0.391049	0.0911046	-230160	Distal non-eGene eQTLs
ENSG00000138594	TMOD3	chr15	51829629	51947295	rs11344508:52010843:TA:T	51718646	51718647	0	3.2e-12	1.1201	0.155796	-37293	Distal non-eGene eQTLs
ENSG00000259577	RP11-430B1.2	chr15	52180094	52205874	rs12593939:52469192:A:G	52176995	52176995	0	5.2e-19	-0.451105	0.0481242	3098	Distal eGene eQTLs
ENSG00000128989	ARPP19	chr15	52547046	52569883	rs73396714:52855648:A:G	52563451	52563451	0	9.86e-15	-6.54403	0.813453	6432	Distal eGene eQTLs
ENSG00000256061	DYX1C1	chr15	55410526	55508234	rs33932364:55699426:C:CAA	55407228	55407228	2	4.24e-05	-0.301479	0.072826	1282	Promoter non-eGene eQTLs
ENSG00000256061	DYX1C1	chr15	55410526	55508234	exm1163814	55497712	55497712	0	3.72e-14	-1.19344	0.15195	10522	Distal eGene eQTLs
ENSG00000157470	FAM81A	chr15	59372694	59523549	rs4238339:59785459:G:A	59493260	59493260	0	2.76e-05	-0.195052	0.0459845	-120567	Distal eGene eQTLs
ENSG00000140307	GTF2A2	chr15	59638063	59657541	rs10152509:59946761:T:C	59654562	59654562	0	4.3e-31	-2.30041	0.181862	2979	Distal eGene eQTLs
ENSG00000259458	MGC15885	chr15	62637173	62645291	rs61207534:62976573:A:C	62684374	62684374	0	5.86e-46	0.650687	0.0400552	-293848	Distal non-eGene eQTLs
ENSG00000166128	RAB8B	chr15	63189470	63267782	rs8041454:63485976:T:C	63193777	63193777	0	1.28e-13	-2.10052	0.273722	-4308	Distal eGene eQTLs
ENSG00000035664	DAPK2	chr15	63907037	64072033	rs28656385:64338533:A:G	64046334	64046334	0	8.68e-09	0.307229	0.052255	25699	Distal eGene eQTLs
ENSG00000180357	ZNF609	chr15	64460743	64686068	rs11631564:64973611:G:A	64681412	64681412	0	1.4e-06	4.7258	0.964783	-220670	Distal eGene eQTLs
ENSG00000265967	AC100830.4	chr15	64695042	64695594	rs11631564:64973611:G:A	64681412	64681412	0	1.18e-07	0.19949	0.0369803	-220670	Distal non-eGene eQTLs
ENSG00000103710	RASL12	chr15	65053338	65076690	rs7170256:65375072:C:T	65082734	65082734	0	1.12e-13	0.543515	0.070638	929	Promoter non-eGene eQTLs
ENSG00000103742	IGDCC4	chr15	65381465	65423072	rs12437686:65686908:A:G	65394570	65394570	1	2.53e-09	0.545697	0.0894917	28502	Distal eGene eQTLs
ENSG00000074696	HACD3	chr15	65530419	65578352	rs60431020:65872842:GT:G	65580504	65580505	0	1.83e-13	4.82158	0.632619	30785	Distal non-eGene eQTLs
ENSG00000169032	MAP2K1	chr15	66386818	66492312	rs12915164:66591223:A:G	66298885	66298885	0	2.46e-20	1.22489	0.125488	-5668	Distal non-eGene eQTLs
ENSG00000128973	CLN6	chr15	68206993	68257211	rs1554223:68545603:G:A	68253265	68253265	0	4.43e-13	-0.505422	0.0674799	3946	Distal eGene eQTLs
ENSG00000159322	ADPGK	chr15	72751370	72785846	rs11072383:72996259:G:A	72703918	72703918	0	1.47e-05	1.0215	0.232853	-17739	Distal non-eGene eQTLs
ENSG00000261801	LOXL1-AS1	chr15	73908072	73928248	rs41429348:74220000:C:T	73927659	73927659	0	1.44e-05	0.879029	0.200137	589	Promoter-eGene eQTLs
ENSG00000067221	STOML1	chr15	73978924	73994622	rs2304715:74284406:C:G	73992065	73992065	0	3.72e-10	-0.440412	0.0685357	2557	Distal eGene eQTLs
ENSG00000138621	PPCDC	chr15	75023556	75117462	rs34492112:75294917:G:A	75002576	75002576	0	4.8e-06	-0.447667	0.0965512	-45357	Distal non-eGene eQTLs
ENSG00000198794	SCAMP5	chr15	74957220	75021496	rs7342591:75306863:A:G	75014522	75014522	0	7.56e-16	-1.09864	0.130719	-57303	Distal eGene eQTLs
ENSG00000169752	NRG4	chr15	75935970	76059795	rs4886747:76151081:G:A	75858740	75858740	0	1.24e-46	3.79415	0.231317	-15455	Distal non-eGene eQTLs
ENSG00000159556	ISL2	chr15	76336725	76342476	rs12595717:76477038:G:A	76184697	76184697	0	5.48e-07	0.297104	0.0583543	-124860	Distal non-eGene eQTLs
ENSG00000140374	ETFA	chr15	76215356	76311472	rs2456047:76484830:A:T	76192489	76192489	0	1.05e-09	-2.90877	0.465373	-132652	Distal non-eGene eQTLs
ENSG00000140382	HMG20A	chr15	77420413	77485607	15:77411350:C:CATTTACTTATAAACTGTGCAGCAGGAGAACAAAACCAGAAGGTTGA	77119008	77119008	0	9.89e-14	0.522688	0.0677754	301136	Distal non-eGene eQTLs
ENSG00000136425	CIB2	chr15	78104607	78131544	rs11547207:78423596:A:C	78131254	78131254	0	1.88e-27	0.791755	0.0676022	290	Promoter-eGene eQTLs
ENSG00000136381	IREB2	chr15	78437432	78501456	rs35095780:78732712:C:CT	78440370	78440370	0	1.95e-08	-1.98795	0.346783	-2939	Distal eGene eQTLs
ENSG00000080644	CHRNA3	chr15	78593053	78621295	rs8040868:78911181:T:C	78618839	78618839	0	4.56e-26	-0.729402	0.0642837	2456	Promoter-eGene eQTLs
ENSG00000259555	RP11-335K5.2	chr15	78625896	78628193	rs111664537:78919550:G:C	78627208	78627208	0	1.26e-10	1.0149	0.153626	-1313	Promoter-eGene eQTLs
ENSG00000058335	RASGRF1	chr15	78959948	79090773	rs5813952:79376346:AG:A	79084004	79084005	0	4.56e-20	5.39445	0.55707	6769	Distal eGene eQTLs
ENSG00000166557	TMED3	chr15	79311063	79427432	rs67268531:79603510:G:A	79311168	79311168	1	1.45e-13	0.531203	0.0693858	-106	Promoter-eGene eQTLs
ENSG00000172379	ARNT2	chr15	80404351	80597937	rs186548199:80696769:G:T	80404427	80404427	0	3.54e-06	-5.11792	1.08833	-77	Promoter-eGene eQTLs
ENSG00000136379	ABHD17C	chr15	80679685	80755621	rs35505201:81032198:G:GCTGT	80739857	80739857	0	1.22e-10	1.46541	0.221671	-60173	Distal eGene eQTLs
ENSG00000172345	STARD5	chr15	81309054	81324183	rs4392019:81616559:C:T	81324218	81324218	0	5.48e-09	1.23995	0.207986	-35	Promoter-eGene eQTLs
ENSG00000182774	RPS17	chr15	82536754	82540564	rs8038497:83317081:G:C	82648330	82648330	0	9.37e-11	6.07263	0.912592	-560	Promoter non-eGene eQTLs
ENSG00000103723	AP3B2	chr15	82659282	82709914	rs12911134:83373943:C:G	82705191	82705191	1	5.99e-20	0.645669	0.0669149	4723	Distal eGene eQTLs
ENSG00000259707	RP11-752G15.4	chr15	82691724	82692358	rs12911134:83373943:C:G	82705191	82705191	1	1.03e-10	0.468073	0.0705044	4723	Distal non-eGene eQTLs
ENSG00000237550	RPL9P9	chr15	82372197	82372912	rs9672992:83731860:T:C	83063108	83063108	0	9.76e-06	-38.0368	8.49089	-137224	Distal non-eGene eQTLs
ENSG00000272887	CSPG4P5	chr15	84401808	84408005	rs7169629:85191274:C:G	84648043	84648043	1	9.16e-06	0.309574	0.0688856	6300	Distal non-eGene eQTLs
ENSG00000275120	RP11-182J1.18	chr15	84597810	84633987	rs66810580:85198350:G:C	84655119	84655119	1	2.44e-06	-0.718629	0.150259	-776	Promoter non-eGene eQTLs
ENSG00000177082	WDR73	chr15	84639282	84654343	rs2292462	84657523	84657523	0	1.65e-19	-0.60374	0.063412	1040	Promoter non-eGene eQTLs
ENSG00000140538	NTRK3	chr15	87859752	88256768	rs59628990:88798812:A:T	88255581	88255581	0	5.68e-07	0.531555	0.104549	1187	Promoter-eGene eQTLs
ENSG00000140511	HAPLN3	chr15	88877289	88895626	rs146809851:89456554:G:A	88913323	88913323	1	2.05e-08	-0.82412	0.143989	88	Promoter non-eGene eQTLs
ENSG00000166819	PLIN1	chr15	89664366	89679427	rs76741626:90294675:G:C	89751444	89751444	0	1.44e-09	0.517187	0.0834795	-134	Promoter non-eGene eQTLs
ENSG00000225193	RPS12P26	chr15	90206573	90206967	rs149306517:90544233:G:A	90001001	90001001	0	1.16e-07	0.787648	0.145918	391	Promoter non-eGene eQTLs
ENSG00000185033	SEMA4B	chr15	90160605	90229679	rs72449355:90724732:CA:C	90181500	90181501	0	1.5e-09	12.9364	2.0903	-20896	Distal eGene eQTLs
ENSG00000197299	BLM	chr15	90717328	90816165	rs3815003:91312823:T:C	90769593	90769593	0	3.19e-15	1.65824	0.202122	-52266	Distal eGene eQTLs
ENSG00000166965	RCCD1	chr15	90954871	90963125	exm1190854	90956756	90956756	1	1.04e-17	-0.987275	0.109904	-1886	Promoter-eGene eQTLs
ENSG00000213471	TTLL13P	chr15	90249531	90265482	rs8026662:91783807:C:T	91240577	91240577	1	2.57e-05	0.343653	0.0807073	-140627	Distal non-eGene eQTLs
ENSG00000173575	CHD2	chr15	92900190	93028005	rs12438062:93433522:C:T	92890292	92890292	0	8.72e-06	-4.6288	1.02751	-7585	Distal non-eGene eQTLs
ENSG00000140450	ARRDC4	chr15	97960699	97973838	rs8026910:98508017:G:T	97964787	97964787	0	1.72e-43	-2.54284	0.162325	-4089	Distal eGene eQTLs
ENSG00000140443	IGF1R	chr15	98648972	98964530	rs10679407:99191743:G:GGC	98648514	98648514	1	3.79e-07	0.393147	0.0761102	457	Promoter-eGene eQTLs
ENSG00000261616	RP11-6O2.3	chr15	99139318	99145370	rs112065296:99646218:C:A	99106013	99106013	0	1.16e-15	0.977427	0.117121	-189	Promoter non-eGene eQTLs
ENSG00000183060	LYSMD4	chr15	99715698	99733561	rs36078095:100273207:C:CG	99733002	99733002	0	7.34e-41	-0.994987	0.0661518	559	Promoter-eGene eQTLs
ENSG00000189419	SPATA41	chr15	100344458	100349655	rs55785541:100890478:G:A	100350273	100350273	0	1.03e-05	0.278965	0.06243	-618	Promoter-eGene eQTLs
ENSG00000272808	RP11-66B24.7	chr15	100849832	100865457	rs7178773:101390674:G:A	100850469	100850469	0	1.64e-08	-0.179265	0.0310986	-638	Promoter-eGene eQTLs
ENSG00000154237	LRRK1	chr15	100919216	101078254	rs74406250:101556026:C:G	101015821	101015821	0	2.72e-11	0.501179	0.0731201	-96606	Distal eGene eQTLs
ENSG00000184277	TM2D3	chr15	101621445	101652391	rs675436:102192540:T:G	101652337	101652337	0	1.03e-24	0.666155	0.0606479	54	Promoter-eGene eQTLs
ENSG00000007384	RHBDF1	chr16	58060	76355	rs1013358	78955	78955	0	9.13e-13	0.691153	0.0936356	-1948	Promoter non-eGene eQTLs
ENSG00000103148	NPRL3	chr16	84272	138860	rs2541608:188606:G:T	138607	138607	0	4.32e-23	-2.4619	0.233583	253	Promoter-eGene eQTLs
ENSG00000076344	RGS11	chr16	268302	275980	rs3743881:326040:A:T	276040	276040	0	2.22e-17	-6.84656	0.77078	-60	Promoter-eGene eQTLs
ENSG00000185615	PDIA2	chr16	283153	287215	rs440401:333017:G:T	283017	283017	0	2.89e-09	-0.423255	0.0696786	135	Promoter-eGene eQTLs
ENSG00000127578	WFIKKN1	chr16	629240	634116	rs4984905:681280:G:T	631280	631280	0	3.79e-17	0.249797	0.0283498	-2041	Promoter-eGene eQTLs
ENSG00000103269	RHBDL1	chr16	675667	678268	rs11865749:717971:C:G	667971	667971	0	4.29e-09	0.574188	0.0956209	115	Promoter non-eGene eQTLs
ENSG00000140990	NDUFB10	chr16	1959509	1961975	rs2531329:1993829:T:C	1943828	1943828	1	1.69e-05	-0.849646	0.195073	-502	Promoter non-eGene eQTLs
ENSG00000140990	NDUFB10	chr16	1959509	1961975	exm1204497	1980126	1980126	0	2.36e-06	0.511505	0.106802	-8089	Distal non-eGene eQTLs
ENSG00000184207	PGP	chr16	2211998	2214807	rs25849:2265071:C:G	2215070	2215070	0	6.37e-11	-1.16652	0.173668	-263	Promoter-eGene eQTLs
ENSG00000182685	BRICD5	chr16	2209254	2211950	rs25849:2265071:C:G	2215070	2215070	1	1.3e-05	-0.321876	0.0729163	-263	Promoter non-eGene eQTLs
ENSG00000127564	PKMYT1	chr16	2968025	2980539	rs2240146:2802684:T:C	2752683	2752683	0	5.04e-05	-2.86778	0.699772	-354	Promoter non-eGene eQTLs
ENSG00000276791	CTD-2270P14.5	chr16	2777320	2780568	rs2335455:2828173:T:C	2778172	2778172	0	1.37e-65	3.95163	0.190235	-853	Promoter-eGene eQTLs
ENSG00000272079	LA16c-380H5.5	chr16	3006121	3007388	rs2717674:3055460:G:C	3005459	3005459	0	1.64e-16	0.400047	0.0464431	-358	Promoter non-eGene eQTLs
ENSG00000167981	ZNF597	chr16	3432423	3443542	rs8056000	3444322	3444322	0	1.58e-20	-1.16015	0.118182	-780	Promoter-eGene eQTLs
ENSG00000185739	SRL	chr16	4189375	4242080	rs5815198:4255946:C:CA	4205945	4205945	1	1.16e-06	0.365494	0.0740069	36135	Distal eGene eQTLs
ENSG00000185739	SRL	chr16	4189375	4242080	rs868302	4207685	4207685	0	1.11e-11	0.561978	0.0803282	34395	Distal eGene eQTLs
ENSG00000067836	ROGDI	chr16	4796969	4802950	rs759992:4838495:A:G	4788494	4788494	0	2.38e-20	-6.08194	0.622804	-97	Promoter non-eGene eQTLs
ENSG00000217930	PAM16	chr16	4331550	4355607	rs144111721:4850414:C:A	4800413	4800413	0	2.3e-05	0.960183	0.224132	2537	Distal non-eGene eQTLs
ENSG00000261617	RP11-243A14.1	chr16	9355589	9408093	rs4780351:9450121:G:A	9356264	9356264	1	1.81e-08	-0.394033	0.0685798	-676	Promoter-eGene eQTLs
ENSG00000182108	DEXI	chr16	10928892	10942460	rs8055876	10948537	10948537	0	1.51e-05	-0.49668	0.113384	-6077	Distal eGene eQTLs
ENSG00000122299	ZC3H7A	chr16	11750587	11797267	rs111511279:11887388:C:CA	11793532	11793532	0	3.49e-07	-2.7615	0.532904	3735	Distal eGene eQTLs
ENSG00000103342	GSPT1	chr16	11868129	11916082	rs185937624:12009277:C:A	11915420	11915420	1	3.3e-06	-1.28554	0.272511	662	Promoter-eGene eQTLs
ENSG00000234719	RP11-166B2.1	chr16	11927374	11976643	rs393329:12070422:T:C	11976565	11976565	0	5.38e-103	-1.19332	0.0402882	78	Promoter-eGene eQTLs
ENSG00000103381	CPPED1	chr16	12659800	12804017	rs2859789:12642581:A:G	12548724	12548724	1	2.19e-05	-0.369234	0.0859575	-571987	Distal non-eGene eQTLs
ENSG00000167186	COQ7	chr16	19067600	19080095	rs4630530:19080184:C:T	19068862	19068862	0	9.54e-15	-1.26565	0.157234	-1263	Promoter-eGene eQTLs
ENSG00000248124	RRN3P1	chr16	21796107	21820410	rs3830664:21831679:CA:C	21820358	21820359	0	9.34e-62	-5.47936	0.275448	52	Promoter-eGene eQTLs
ENSG00000178188	SH2B1	chr16	28846601	28874212	rs739595:28075767:G:A	28064446	28064446	1	2.51e-05	-0.392369	0.0920195	-937	Promoter non-eGene eQTLs
ENSG00000198156	NPIPB6	chr16	28342556	28363508	rs8061877	28845498	28845498	0	4.79e-12	0.52612	0.0738152	910	Promoter non-eGene eQTLs
ENSG00000214725	CDIPT-AS1	chr16	29863594	29868053	rs747973	29863920	29863920	0	9.27e-48	-0.914487	0.0548734	-327	Promoter-eGene eQTLs
ENSG00000169592	INO80E	chr16	29995295	30005793	rs143249661:30016820:A:C	30005499	30005499	1	3.41e-06	-1.32271	0.280797	-10205	Distal eGene eQTLs
ENSG00000149922	TBX6	chr16	30085794	30091887	rs3809627:30103160:C:A	30091839	30091839	0	7.27e-10	-0.213076	0.0337527	48	Promoter-eGene eQTLs
ENSG00000280789	PAGR1	chr16	29815953	29820117	rs36084237:30134312:C:G	30122991	30122991	0	3.4e-07	2.20323	0.42476	515	Promoter non-eGene eQTLs
ENSG00000183604	SMG1P5	chr16	30267554	30335374	rs148773715:30390168:A:AGAGAGGGGGAGAGAGG	30378847	30378847	0	3.47e-09	-1.32552	0.219369	-741	Promoter non-eGene eQTLs
ENSG00000261332	RP11-297C4.1	chr16	30498767	30499554	rs1557672:30510571:C:T	30499250	30499250	0	7.22e-30	-0.793761	0.0643383	304	Promoter-eGene eQTLs
ENSG00000260487	RP11-297C4.3	chr16	30480589	30481346	rs1557672:30510571:C:T	30499250	30499250	0	3.85e-24	-0.247549	0.0228623	304	Promoter non-eGene eQTLs
ENSG00000103549	RNF40	chr16	30761746	30776307	rs72785547:31119554:G:A	31108233	31108233	0	3.13e-10	-0.46363	0.0718281	-2126	Promoter non-eGene eQTLs
ENSG00000102921	N4BP1	chr16	48538727	48620148	16:48642666:T:TA	48608755	48608755	0	5.32e-07	-1.31419	0.257826	11393	Distal eGene eQTLs
ENSG00000159387	IRX6	chr16	55323761	55330760	rs31078:55359126:A:T	55325214	55325214	0	3.8e-08	-0.417814	0.0744901	-1454	Promoter-eGene eQTLs
ENSG00000087245	MMP2	chr16	55389701	55506691	rs1005912:55504827:A:T	55470915	55470915	0	3.02e-29	-0.747669	0.0613962	-81215	Distal eGene eQTLs
ENSG00000087253	LPCAT2	chr16	55508999	55586670	rs1005912:55504827:A:T	55470915	55470915	0	1.91e-60	-7.05494	0.360096	-81215	Distal non-eGene eQTLs
ENSG00000261997	RP11-212I21.4	chr16	55538201	55542027	rs1005912:55504827:A:T	55470915	55470915	0	3.23e-39	-0.633488	0.0432484	-81215	Distal non-eGene eQTLs
ENSG00000169715	MT1E	chr16	56625476	56627112	rs1610215:56659525:C:G	56625613	56625613	0	2.26e-14	0.564001	0.0711557	-138	Promoter-eGene eQTLs
ENSG00000187193	MT1X	chr16	56682425	56684196	rs1599933	56681950	56681950	0	1.58e-24	-11.337	1.03697	474	Promoter-eGene eQTLs
ENSG00000140848	CPNE2	chr16	57092538	57148367	rs291053:57149978:C:T	57116066	57116066	0	1.73e-31	0.81486	0.0639154	-23529	Distal eGene eQTLs
ENSG00000102978	POLR2C	chr16	57462388	57472010	rs223861:57481670:T:C	57447758	57447758	0	1.45e-07	-0.417124	0.0779071	-333	Promoter non-eGene eQTLs
ENSG00000088682	COQ9	chr16	57447426	57461275	rs598486:57511625:G:A	57477713	57477713	0	1e-05	-0.921196	0.205924	9614	Distal non-eGene eQTLs
ENSG00000140854	KATNB1	chr16	57735731	57757250	rs35820612:57831336:C:G	57797424	57797424	0	1.56e-14	1.79471	0.224919	762	Promoter non-eGene eQTLs
ENSG00000070729	CNGB1	chr16	57882341	57971116	rs2405011	57960331	57960331	0	3.76e-05	44.8006	10.7471	10785	Distal eGene eQTLs
ENSG00000159648	TEPP	chr16	57976436	57988116	rs4583232	57977546	57977546	0	8.62e-34	0.652084	0.0489379	-1111	Promoter-eGene eQTLs
ENSG00000070770	CSNK2A2	chr16	58157908	58197920	rs41522747:58060611:T:G	58026707	58026707	1	2.16e-05	-0.371005	0.0862986	-1141	Promoter non-eGene eQTLs
ENSG00000159792	PSKH1	chr16	67893273	67929678	rs749242:67491571:T:C	67457668	67457668	0	0.000122992	-0.986987	0.254502	23569	Distal non-eGene eQTLs
ENSG00000263126	CTC-479C5.10	chr16	67882462	67886367	rs1124324:67897487:C:T	67863584	67863584	0	7.98e-06	-0.370015	0.0817759	-16852	Distal non-eGene eQTLs
ENSG00000132612	VPS4A	chr16	69311357	69326939	rs66469930:69346087:GT:G	69312184	69312185	0	8.1e-06	1.16029	0.25662	-828	Promoter-eGene eQTLs
ENSG00000260914	RP11-343C2.11	chr16	69299683	69322700	rs9927130:69346752:A:G	69312849	69312849	0	4.22e-06	1.01707	0.21804	-13167	Distal eGene eQTLs
ENSG00000168807	SNTB2	chr16	69187130	69309052	rs9927130:69346752:A:G	69312849	69312849	0	8.94e-16	-11.7931	1.40704	-1493	Promoter non-eGene eQTLs
ENSG00000261556	SMG1P7	chr16	70219575	70246610	rs4985407:70285901:A:G	70251998	70251998	0	6.48e-72	-2.07541	0.0933711	-68	Promoter non-eGene eQTLs
ENSG00000214353	VAC14-AS1	chr16	70755099	70773251	rs3785425:70728477:G:A	70694574	70694574	0	7.77e-07	0.248774	0.0495531	106587	Distal non-eGene eQTLs
ENSG00000166747	AP1G1	chr16	71729001	71809201	rs57246059:71779748:GCATATATTT:G	71745845	71745854	0	2.95e-58	33.6838	1.76452	63356	Distal eGene eQTLs
ENSG00000182149	IST1	chr16	71845997	71931199	rs3213419:72042428:T:C	72008529	72008529	1	6.33e-05	-0.3211	0.0794214	59	Promoter non-eGene eQTLs
ENSG00000135702	CHST5	chr16	75528536	75535247	rs16975847:75589590:G:A	75555692	75555692	0	1.99e-08	0.383538	0.0669521	594	Promoter non-eGene eQTLs
ENSG00000205078	SYCE1L	chr16	77199398	77213215	rs56277205:77237363:CA:C	77203466	77203467	0	8.37e-38	-0.664935	0.0464761	-4069	Distal eGene eQTLs
ENSG00000140876	NUDT7	chr16	77722493	77742260	rs2914456	77722716	77722716	1	1.17e-13	-0.56017	0.0728721	-224	Promoter-eGene eQTLs
ENSG00000135698	MPHOSPH6	chr16	82147799	82170226	rs2303264:82203711:G:T	82170106	82170106	0	6.29e-12	-1.33817	0.188874	120	Promoter-eGene eQTLs
ENSG00000103160	HSDL1	chr16	84122147	84145192	rs71404148:84117589:G:C	84083984	84083984	0	3.96e-08	5.3035	0.946892	2606	Distal non-eGene eQTLs
ENSG00000168418	KCNG4	chr16	84218668	84239750	rs8052098:84341104:A:T	84307498	84307498	1	3.21e-07	-0.369163	0.0710154	-12852	Distal non-eGene eQTLs
ENSG00000103175	WFDC1	chr16	84294647	84329851	rs8053452:84341105:T:C	84307499	84307499	0	7.87e-09	-1.39588	0.236715	-12853	Distal eGene eQTLs
ENSG00000140950	TLDC1	chr16	84476422	84554033	rs454253:84536028:G:C	84502422	84502422	1	3.04e-12	0.512293	0.0711741	51611	Distal eGene eQTLs
ENSG00000153786	ZDHHC7	chr16	84974182	85011535	rs74758820:85043782:T:C	85010176	85010176	0	7.23e-06	-0.526919	0.11589	1359	Promoter-eGene eQTLs
ENSG00000275393	RP11-568J23.8	chr16	85697336	85697868	rs400882:85754652:G:A	85721046	85721046	0	1.15e-06	0.273348	0.0553405	30083	Distal non-eGene eQTLs
ENSG00000260456	C16orf95	chr16	87083563	87317420	exm1266491	87317167	87317167	0	9.65e-07	0.115016	0.0231137	253	Promoter-eGene eQTLs
ENSG00000103264	FBXO31	chr16	87326988	87392142	rs8059409:87381066:T:C	87347460	87347460	0	5.84e-46	-9.36957	0.576764	44682	Distal eGene eQTLs
ENSG00000140941	MAP1LC3B	chr16	87383996	87404779	rs8059409:87381066:T:C	87347460	87347460	0	3.51e-11	0.514832	0.0755615	44682	Distal non-eGene eQTLs
ENSG00000226180	RP11-278A23.1	chr16	87693538	87696147	rs147441134:88227696:C:T	88194090	88194090	2	1.53e-05	-0.954252	0.217968	191	Promoter non-eGene eQTLs
ENSG00000103335	PIEZO1	chr16	88715344	88785211	rs8053350:88794403:G:A	88727995	88727995	1	6.9e-06	0.329243	0.0722512	57216	Distal eGene eQTLs
ENSG00000103335	PIEZO1	chr16	88715344	88785211	rs11643303:88834014:A:C	88767606	88767606	0	6.68e-07	-0.579096	0.114642	17605	Distal eGene eQTLs
ENSG00000259877	RP11-46C24.7	chr16	89215212	89217653	rs8058136:89284493:G:A	89218085	89218085	0	1.31e-12	-2.04553	0.279203	-432	Promoter-eGene eQTLs
ENSG00000170100	ZNF778	chr16	89217704	89237071	rs8058136:89284493:G:A	89218085	89218085	1	3.72e-06	0.694273	0.147971	-382	Promoter-eGene eQTLs
ENSG00000167522	ANKRD11	chr16	89267628	89490561	rs58145428:89430475:A:AACAC	89364067	89364067	0	1.51e-05	-1.55546	0.355095	126494	Distal eGene eQTLs
ENSG00000185324	CDK10	chr16	89680738	89696364	rs145590108:89641624:G:T	89575216	89575216	1	1.41e-07	-0.644643	0.120267	552	Promoter non-eGene eQTLs
ENSG00000131165	CHMP1A	chr16	89644432	89657845	rs3794638:89753436:C:A	89687028	89687028	2	7.52e-07	-0.513109	0.102068	-459	Promoter non-eGene eQTLs
ENSG00000204991	SPIRE2	chr16	89818180	89871319	rs7204250:89883224:C:G	89816816	89816816	0	6.25e-08	0.72624	0.131674	1363	Promoter-eGene eQTLs
ENSG00000258839	MC1R	chr16	89912120	89920977	rs62056100:89939753:C:T	89873345	89873345	1	3.59e-05	0.542872	0.1299	241	Promoter non-eGene eQTLs
ENSG00000258839	MC1R	chr16	89912120	89920977	rs3212351:89984087:CAT:C	89917679	89917681	0	5.13e-14	-0.539162	0.0690559	-5560	Distal eGene eQTLs
ENSG00000140995	DEF8	chr16	89947926	89968060	rs370010270:90016798:AT:A	89950390	89950391	0	1.53e-09	-3.04158	0.491714	-2465	Promoter-eGene eQTLs
ENSG00000141013	GAS8	chr16	90019630	90044975	rs77603042:90083239:A:G	90016831	90016831	1	4.39e-06	0.589744	0.126658	3297	Distal non-eGene eQTLs
ENSG00000187624	C17orf97	chr17	410328	431062	rs11150882	409857	409857	0	4.26e-28	0.842215	0.0708898	470	Promoter-eGene eQTLs
ENSG00000262228	RP11-676J12.4	chr17	763566	765319	rs2657621:635080:A:C	731840	731840	0	9.73e-08	-0.110878	0.0204157	572	Promoter non-eGene eQTLs
ENSG00000132376	INPP5K	chr17	1494572	1516888	rs77478392:1393983:G:A	1490689	1490689	0	7.86e-07	-2.21269	0.44095	2123	Promoter non-eGene eQTLs
ENSG00000185924	RTN4RL1	chr17	1934678	2025345	rs76705203:1880261:C:A	1976967	1976967	0	1.4e-06	2.79802	0.571151	48378	Distal eGene eQTLs
ENSG00000108963	DPH1	chr17	2030111	2043430	rs11078793:1951364:T:A	2048070	2048070	0	1.4e-19	-2.90092	0.304026	1938	Promoter non-eGene eQTLs
ENSG00000167720	SRR	chr17	2303384	2325260	rs3744270:2207326:G:A	2304032	2304032	0	7.48e-92	-3.91793	0.145614	-649	Promoter-eGene eQTLs
ENSG00000197417	SHPK	chr17	3608263	3636322	rs9913319:3533412:G:A	3630118	3630118	0	8.35e-22	0.669434	0.0657563	6204	Distal eGene eQTLs
ENSG00000004660	CAMKK1	chr17	3860316	3894891	rs8065798:3781793:T:C	3878499	3878499	0	2.97e-09	-1.76174	0.290247	16392	Distal eGene eQTLs
ENSG00000108515	ENO3	chr17	4948093	4957131	rs4790714:4852463:C:T	4949168	4949168	0	2.94e-17	-0.935827	0.105799	-1076	Promoter-eGene eQTLs
ENSG00000108561	C1QBP	chr17	5432778	5448830	rs34312464:5338059:T:TA	5434739	5434739	0	1.11e-06	2.00047	0.404307	14091	Distal eGene eQTLs
ENSG00000256806	C17orf100	chr17	6651719	6693202	rs7226265:6556022:A:G	6652703	6652703	0	2.26e-24	-0.864381	0.0793666	-985	Promoter-eGene eQTLs
ENSG00000274114	CTC-281F24.3	chr17	6657035	6693577	rs7226265:6556022:A:G	6652703	6652703	0	2.5e-36	0.479123	0.0343491	-1069	Promoter non-eGene eQTLs
ENSG00000261996	CTC-281F24.1	chr17	6653465	6655009	rs9913412:6558205:C:T	6654886	6654886	0	2.38e-05	-0.129349	0.0302462	123	Promoter-eGene eQTLs
ENSG00000262943	ALOX12P2	chr17	6853862	6954107	rs116464332:6757094:G:A	6853775	6853775	0	9.61e-09	-0.895799	0.15284	86	Promoter-eGene eQTLs
ENSG00000219200	RNASEK	chr17	7012418	7014532	rs3180517:6917850:C:A	7014531	7014531	0	7.29e-09	-0.622848	0.105377	-2114	Promoter-eGene eQTLs
ENSG00000132535	DLG4	chr17	7189891	7219702	rs222854:7112880:C:T	7209561	7209561	0	2.75e-08	15.7175	2.77262	10141	Distal eGene eQTLs
ENSG00000170291	ELP5	chr17	7251417	7259940	rs59984818:7136406:C:CAAAAAAAA	7233087	7233087	0	4.49e-05	0.82574	0.200117	1458	Promoter non-eGene eQTLs
ENSG00000170296	GABARAP	chr17	7240015	7242770	rs58574748:7145492:C:CA	7242173	7242173	0	8.71e-07	3.42837	0.686067	597	Promoter-eGene eQTLs
ENSG00000175826	CTDNEP1	chr17	7243592	7252491	rs56219105:7165395:CG:C	7262076	7262077	0	2.29e-20	2.285	0.233878	13	Promoter non-eGene eQTLs
ENSG00000006047	YBX2	chr17	7288253	7294615	rs5412:7184046:G:A	7280727	7280727	0	1.97e-08	0.551032	0.0961642	940	Promoter non-eGene eQTLs
ENSG00000167874	TMEM88	chr17	7855066	7856099	rs117643180:7185779:C:A	7282460	7282460	0	2.12e-05	0.415371	0.0965206	-793	Promoter non-eGene eQTLs
ENSG00000072818	ACAP1	chr17	7336530	7351478	exm1286923	7350996	7350996	0	5.18e-06	0.199313	0.0431434	-14467	Distal eGene eQTLs
ENSG00000161955	TNFSF13	chr17	7558293	7561608	exm1288075	7559652	7559652	0	1.82e-10	-1.3455	0.20556	-1360	Promoter-eGene eQTLs
ENSG00000129194	SOX15	chr17	7588179	7590170	rs57676268:7513273:C:CAT	7609955	7609955	0	6.7e-08	-0.515199	0.0936347	3991	Distal non-eGene eQTLs
ENSG00000108947	EFNB3	chr17	7705203	7711378	rs1123547	7716543	7716543	1	7.05e-07	0.363804	0.0721791	811	Promoter non-eGene eQTLs
ENSG00000170037	CNTROB	chr17	7932102	7949918	rs9911390:7833223:T:C	7929905	7929905	0	5.43e-11	-0.439155	0.0651295	2196	Promoter-eGene eQTLs
ENSG00000125434	SLC25A35	chr17	8287764	8295343	rs1861956:8198686:C:T	8295368	8295368	0	6.67e-06	0.401123	0.0878812	-25	Promoter-eGene eQTLs
ENSG00000109047	RCVRN	chr17	9896321	9905621	rs75438860:9801828:T:C	9898511	9898511	0	6.46e-41	-0.975941	0.0648284	7110	Distal eGene eQTLs
ENSG00000007237	GAS7	chr17	9910610	10198551	exm2272486	10117188	10117188	0	1.05e-19	0.594072	0.0620268	81363	Distal eGene eQTLs
ENSG00000154957	ZNF18	chr17	11977440	11997510	rs79602383:11925336:T:C	12022019	12022019	0	1.64e-06	-0.425152	0.087372	-1195	Promoter non-eGene eQTLs
ENSG00000266709	RP11-214O1.2	chr17	14303855	14305505	rs7223809:14200898:G:A	14297581	14297581	0	5.8e-12	0.737284	0.103878	19	Promoter non-eGene eQTLs
ENSG00000276855	CTD-3157E16.2	chr17	15789017	15789705	rs62070979:15689515:G:C	15786201	15786201	0	2.17e-29	-0.9725	0.0796164	417	Promoter non-eGene eQTLs
ENSG00000170425	ADORA2B	chr17	15944918	15975746	rs2779207:15870401:T:A	15967087	15967087	0	2.99e-05	-0.471109	0.111571	-22170	Distal eGene eQTLs
ENSG00000108591	DRG2	chr17	18087887	18107971	rs2925139:18008592:A:G	18105278	18105278	0	4.33e-20	2.20817	0.227879	-17392	Distal eGene eQTLs
ENSG00000154874	CCDC144B	chr17	18537801	18625617	17:19015691:T:C	19112378	19112378	1	4.82e-05	-0.924783	0.225056	258	Promoter non-eGene eQTLs
ENSG00000236819	LINC01563	chr17	21075557	21090615	rs55650777:20982073:A:G	21078760	21078760	0	9.15e-07	0.208401	0.0417892	-3204	Distal eGene eQTLs
ENSG00000274180	NATD1	chr17	21238871	21253410	rs12953029:21155757:C:T	21252444	21252444	0	1.42e-15	-1.09961	0.132213	966	Promoter-eGene eQTLs
ENSG00000007171	NOS2	chr17	27756767	27800499	rs3751972:26206414:C:A	27879388	27879388	0	1.19e-41	-0.42597	0.0279711	-4743	Distal non-eGene eQTLs
ENSG00000227543	SPAG5-AS1	chr17	28598791	28617377	rs2286519:26881730:G:A	28554712	28554712	0	6.19e-07	-1.12923	0.222875	-2044	Promoter non-eGene eQTLs
ENSG00000087111	PIGS	chr17	28553384	28571872	rs622463:26975574:A:C	28648556	28648556	0	2.04e-64	-16.9149	0.824989	-3102	Distal non-eGene eQTLs
ENSG00000167525	PROCA1	chr17	28703198	28711854	rs149264208:27047243:T:TG	28720225	28720225	0	1.15e-34	-1.6613	0.122685	-1796	Promoter non-eGene eQTLs
ENSG00000167543	TP53I13	chr17	29566053	29573157	rs497993:27895528:T:C	29568510	29568510	0	7.46e-05	-0.20533	0.0512961	-2458	Promoter-eGene eQTLs
ENSG00000168792	ABHD15	chr17	29560548	29567137	rs200199476:27895682:GC:G	29568664	29568665	0	3.37e-34	-0.895516	0.0667009	-1527	Promoter-eGene eQTLs
ENSG00000196712	NF1	chr17	31094928	31382116	rs25533:28562892:A:G	30235874	30235874	1	1.65e-05	0.6601	0.151392	128	Promoter non-eGene eQTLs
ENSG00000250462	LRRC37BP1	chr17	30629681	30637466	17:28927355:C:G	30600337	30600337	0	3.19e-07	-10.4762	2.01476	459	Promoter non-eGene eQTLs
ENSG00000108671	PSMD11	chr17	32444262	32483318	rs11651449:30640807:A:G	32313788	32313788	0	1.17e-05	1.18268	0.266463	-47612	Distal non-eGene eQTLs
ENSG00000176658	MYO1D	chr17	32492523	32877177	rs735555:30817450:C:T	32490432	32490432	0	9.84e-19	0.793214	0.0853705	-3813	Distal non-eGene eQTLs
ENSG00000108684	ASIC2	chr17	33013088	34174964	rs79330924:32260683:T:A	33933664	33933664	0	3.05e-05	-0.681721	0.161632	241300	Distal eGene eQTLs
ENSG00000166750	SLFN5	chr17	35243037	35273655	rs883416:33570441:C:A	35243422	35243422	0	1.19e-31	2.1228	0.165976	-386	Promoter-eGene eQTLs
ENSG00000092871	RFFL	chr17	35005991	35089319	rs201352454:33894166:T:TA	35567147	35567147	2	5.35e-05	-0.863002	0.211313	973	Promoter non-eGene eQTLs
ENSG00000002834	LASP1	chr17	38869860	38921770	rs226212:37036554:G:A	38880301	38880301	0	9.78e-09	-2.85018	0.486555	-10442	Distal eGene eQTLs
ENSG00000131748	STARD3	chr17	39637066	39663484	rs881844:37810218:C:G	39653965	39653965	0	2.12e-05	0.661658	0.153752	-16900	Distal eGene eQTLs
ENSG00000131771	PPP1R1B	chr17	39626741	39636626	Ancestry_CHINESE_Cluster18_chr17_37817482	39661229	39661229	0	6.79e-08	-1.02343	0.186087	1819583	Distal non-eGene eQTLs
ENSG00000141741	MIEN1	chr17	39728497	39730787	rs9896218	39738210	39738210	0	7.7e-06	-0.95357	0.210379	-283	Promoter non-eGene eQTLs
ENSG00000171475	WIPF2	chr17	40219305	40284136	rs71152664:38485389:CT:C	40329137	40329138	0	1.32e-05	1.27514	0.289032	-19945	Distal non-eGene eQTLs
ENSG00000108349	CASC3	chr17	40140319	40172183	rs9894845:38506457:T:C	40350205	40350205	1	3.01e-06	-0.736166	0.155404	334	Promoter non-eGene eQTLs
ENSG00000108352	RAPGEFL1	chr17	40177011	40195656	rs200353854:38507378:ACTCTCC:A	40351126	40351132	0	7.36e-29	7.34511	0.608129	-587	Promoter non-eGene eQTLs
ENSG00000173801	JUP	chr17	41754605	41786931	rs7213095:39940768:G:T	41784516	41784516	0	2.81e-05	-1.04398	0.246402	2415	Promoter-eGene eQTLs
ENSG00000204815	TTC25	chr17	41930636	41965651	exm1323322	41930733	41930733	0	3.41e-07	0.757266	0.146011	-98	Promoter-eGene eQTLs
ENSG00000173757	STAT5B	chr17	42199169	42276707	rs8077428:40087944:C:G	41931691	41931691	0	6.45e-05	2.75172	0.681404	-1149	Promoter non-eGene eQTLs
ENSG00000197291	RAMP2-AS1	chr17	42753915	42761257	rs9892728:40913366:C:T	42761348	42761348	0	1.04e-10	-0.537686	0.0810028	-91	Promoter-eGene eQTLs
ENSG00000279602	CTD-3014M21.1	chr17	43360042	43361361	rs111620717:41438698:G:A	43361330	43361330	1	5.21e-13	0.594395	0.0796177	31	Promoter-eGene eQTLs
ENSG00000175906	ARL4D	chr17	43398960	43401137	rs75854888:41487451:G:A	43410083	43410083	0	1.57e-05	31.0935	7.11144	-11124	Distal eGene eQTLs
ENSG00000108852	MPP2	chr17	43875358	43909711	rs231477:41984849:C:G	43907481	43907481	0	2.71e-08	3.34708	0.590135	2230	Promoter-eGene eQTLs
ENSG00000141349	G6PC3	chr17	44070736	44076344	rs228758:42148205:C:T	44070837	44070837	0	1.79e-05	-0.624269	0.143781	-102	Promoter-eGene eQTLs
ENSG00000161654	LSM12	chr17	44034636	44067619	rs77288674:42182171:CCCACTG:C	44104803	44104809	0	3.4e-05	-1.6098	0.383971	11109	Distal non-eGene eQTLs
ENSG00000260793	RP5-882C2.2	chr17	44221402	44223710	rs113844752:42297631:C:A	44220263	44220263	0	3.36e-12	-0.453474	0.0631374	1138	Promoter-eGene eQTLs
ENSG00000013306	SLC25A39	chr17	44319626	44324870	rs3785818:42389278:G:C	44311910	44311910	0	1.66e-34	-0.859702	0.0636731	-4822	Distal non-eGene eQTLs
ENSG00000167131	CCDC103	chr17	44899143	44905390	rs9904512:42981104:T:C	44903736	44903736	1	1.65e-09	0.464092	0.0751874	-4594	Distal eGene eQTLs
ENSG00000172992	DCAKD	chr17	45023341	45061109	rs4793173:43127715:A:C	45050347	45050347	0	1.31e-58	3.41968	0.178384	10762	Distal eGene eQTLs
ENSG00000181513	ACBD4	chr17	45132601	45144181	rs4986169:43207849:G:A	45130482	45130482	0	1.46e-07	0.773731	0.144559	2118	Promoter-eGene eQTLs
ENSG00000178852	EFCAB13	chr17	47323291	47441312	rs118099962:45401335:T:C	47323969	47323969	1	1.89e-09	-0.924367	0.150329	-679	Promoter-eGene eQTLs
ENSG00000264920	RP11-6N17.4	chr17	47891256	47895812	rs72833487:45972980:G:A	47895614	47895614	2	4.78e-08	1.45885	0.262102	198	Promoter-eGene eQTLs
ENSG00000159199	ATP5G1	chr17	48892766	48895871	rs1962412:46970259:T:C	48892897	48892897	0	8.35e-43	0.907556	0.0585418	-132	Promoter-eGene eQTLs
ENSG00000279792	RP11-893F2.18	chr17	50362968	50365232	rs11658398:47648261:C:A	49570899	49570899	0	3.47e-05	-0.155324	0.0370937	3165	Distal non-eGene eQTLs
ENSG00000136444	RSAD1	chr17	50478801	50485975	exm1336189	50479965	50479965	0	2.5e-07	-1.90302	0.362621	-1165	Promoter-eGene eQTLs
ENSG00000136449	MYCBPAP	chr17	50508385	50531501	rs6504661:48580126:T:A	50502765	50502765	0	1.82e-07	-0.208345	0.0392328	5563	Distal non-eGene eQTLs
ENSG00000229980	TOB1-AS1	chr17	50866680	50909737	rs12949115:48944345:C:A	50866984	50866984	0	1.81e-09	0.252719	0.0410496	-305	Promoter-eGene eQTLs
ENSG00000011052	NME1-NME2	chr17	51153591	51171744	rs8075231:49233551:C:T	51156190	51156190	1	2.19e-05	0.380314	0.0885444	-2600	Distal eGene eQTLs
ENSG00000166263	STXBP4	chr17	54968728	55173632	exm2226765	54968815	54968815	1	6.65e-06	-1.25594	0.275126	-88	Promoter-eGene eQTLs
ENSG00000261873	RP11-515E23.1	chr17	55448434	55511444	rs55824040:53587577:GTATGCATTCC:G	55510216	55510226	0	4.19e-74	1.07604	0.0473331	1228	Promoter-eGene eQTLs
ENSG00000261873	RP11-515E23.1	chr17	55448434	55511444	rs716391:53589444:T:C	55512083	55512083	1	1.38e-05	0.513016	0.116552	-639	Promoter-eGene eQTLs
ENSG00000121057	AKAP1	chr17	57085093	57121349	rs2230772:55183203:T:C	57105842	57105842	0	1.44e-09	-3.80632	0.614357	-20750	Distal eGene eQTLs
ENSG00000108389	MTMR4	chr17	58489530	58517905	rs877070:55713392:C:A	57636031	57636031	0	1.98e-06	2.26402	0.469107	-380180	Distal non-eGene eQTLs
ENSG00000180891	CUEDC1	chr17	57861244	57955323	rs73329834:55940910:A:G	57863549	57863549	0	1.08e-05	-2.6485	0.594307	91774	Distal eGene eQTLs
ENSG00000136451	VEZF1	chr17	57971548	57988259	rs11413908:56002479:T:TA	57925118	57925118	1	3.04e-05	-0.361671	0.0857273	-12785	Distal non-eGene eQTLs
ENSG00000278627	RP11-506H21.5	chr17	58202353	58203003	rs7226197:56322253:T:C	58244892	58244892	0	1.5e-07	-0.140716	0.0263126	-26344	Distal non-eGene eQTLs
ENSG00000108423	TUBD1	chr17	59859483	59892945	rs36143328:57298780:C:CT	59221419	59221419	0	5.46e-05	0.333094	0.0816635	-952	Promoter non-eGene eQTLs
ENSG00000068097	HEATR6	chr17	60043195	60078931	rs2627907:58218881:A:C	60141520	60141520	0	9.77e-08	2.85962	0.526611	-1439	Promoter non-eGene eQTLs
ENSG00000170921	TANC2	chr17	63009557	63427699	17:61043479:A:ACCACGCACGCGCCC	62966118	62966118	0	1.57e-10	2.19142	0.333583	2431	Promoter non-eGene eQTLs
ENSG00000266173	STRADA	chr17	63702833	63741970	rs2727324:61922102:G:C	63844742	63844742	0	1.85e-05	-0.783144	0.180684	-1677	Promoter non-eGene eQTLs
ENSG00000108654	DDX5	chr17	64499617	64508199	rs1991401:62502435:A:G	64506317	64506317	0	2.49e-09	-31.9556	5.23792	1882	Promoter-eGene eQTLs
ENSG00000258890	CEP95	chr17	64506589	64542461	rs57166100:62506280:T:C	64510162	64510162	0	1.88e-09	9.80081	1.59364	-3574	Distal eGene eQTLs
ENSG00000154240	CEP112	chr17	65635539	66192084	rs201326543:64181295:G:GT	66185177	66185177	0	6.65e-18	-8.25333	0.912761	6907	Distal eGene eQTLs
ENSG00000070540	WIPI1	chr17	68420949	68457513	rs78095701:66443609:A:C	68447468	68447468	0	7.43e-26	-1.1197	0.0991742	10045	Distal eGene eQTLs
ENSG00000154258	ABCA9	chr17	68974489	69061064	rs2952300:66587487:G:A	68591346	68591346	2	4.73e-05	-0.2838	0.0689912	450	Promoter non-eGene eQTLs
ENSG00000166685	COG1	chr17	73192633	73208507	rs113467507:71226206:C:T	73230067	73230067	1	1.84e-05	0.54542	0.125801	2166	Promoter non-eGene eQTLs
ENSG00000141219	C17orf80	chr17	73232234	73248947	rs140091066:71235060:C:CTGTGTG	73238921	73238921	0	1.02e-61	5.55394	0.279322	-6688	Distal eGene eQTLs
ENSG00000182040	USH1G	chr17	74916085	74923256	rs745681:72884688:C:G	74888565	74888565	0	3.29e-06	0.422442	0.0895374	5216	Distal non-eGene eQTLs
ENSG00000167861	HID1	chr17	74950744	74973166	rs11650024:72968154:G:T	74972059	74972059	0	2.66e-29	-2.30832	0.189329	1107	Promoter-eGene eQTLs
ENSG00000180901	KCTD2	chr17	75032576	75065889	17:73006781:CA:C	75010686	75010687	0	3.66e-11	-4.86952	0.715434	1984	Promoter non-eGene eQTLs
ENSG00000177728	TMEM94	chr17	75441160	75500090	rs11077791:73474629:T:G	75478548	75478548	0	2.97e-07	5.38957	1.03368	-37389	Distal eGene eQTLs
ENSG00000182473	EXOC7	chr17	76081018	76121576	rs3837793:74068229:A:AC	76072148	76072148	0	1.38e-06	2.06216	0.420688	-187	Promoter non-eGene eQTLs
ENSG00000214140	PRCD	chr17	76527587	76553578	rs4648340:74542217:C:T	76546135	76546135	0	1.44e-16	0.667374	0.0773167	-18549	Distal eGene eQTLs
ENSG00000267543	RP11-666A8.7	chr17	76549952	76550826	rs4648340:74542217:C:T	76546135	76546135	0	5.54e-40	6.3681	0.429368	-18549	Distal non-eGene eQTLs
ENSG00000272386	RP11-666A8.12	chr17	76551353	76551750	rs4346230:74546560:T:C	76550478	76550478	0	5.17e-22	-2.66079	0.259866	874	Promoter-eGene eQTLs
ENSG00000163597	SNHG16	chr17	76557767	76565348	rs9911606:74548000:G:T	76551918	76551918	1	4.3e-06	0.383786	0.0823483	-1967	Promoter non-eGene eQTLs
ENSG00000214140	PRCD	chr17	76527587	76553578	rs34207189:74569198:C:T	76573116	76573116	1	9.45e-07	-0.522763	0.104966	-3324	Distal non-eGene eQTLs
ENSG00000070731	ST6GALNAC2	chr17	76565380	76586956	rs16967307	76577450	76577450	0	4.44e-40	-14.5106	0.976867	9506	Distal eGene eQTLs
ENSG00000163597	SNHG16	chr17	76557767	76565348	rs16967307	76577450	76577450	0	2.15e-22	-0.924352	0.0893438	-7658	Distal non-eGene eQTLs
ENSG00000182534	MXRA7	chr17	76672552	76711016	rs9892163:74679597:C:T	76683515	76683515	0	1.8e-41	-1.09426	0.072055	27501	Distal eGene eQTLs
ENSG00000182534	MXRA7	chr17	76672552	76711016	rs75118211:74700311:G:A	76704229	76704229	1	4.15e-23	0.663976	0.0629694	6787	Distal eGene eQTLs
ENSG00000070495	JMJD6	chr17	76712833	76726799	rs2240774:74710572:T:C	76714490	76714490	0	8.29e-13	-0.511302	0.0691344	12309	Distal eGene eQTLs
ENSG00000167889	MGAT5B	chr17	76868457	76950393	rs74818463:74946855:T:G	76950773	76950773	0	2.59e-06	0.908802	0.19055	18383	Distal non-eGene eQTLs
ENSG00000267665	RP11-13K12.2	chr17	77526999	77536592	rs36085797:75523518:G:A	77527436	77527436	0	1.96e-24	-4.72972	0.433605	-438	Promoter-eGene eQTLs
ENSG00000183077	AFMID	chr17	78187318	78207701	rs73999670:76183602:C:T	78187521	78187521	0	1.17e-06	0.953223	0.193113	-204	Promoter-eGene eQTLs
ENSG00000267123	CTD-2357A8.3	chr17	78617390	78632057	rs9889754:76613148:G:T	78617066	78617066	1	3.05e-10	-0.736278	0.113988	14991	Distal eGene eQTLs
ENSG00000108669	CYTH1	chr17	78674049	78782297	rs7501592:76619883:G:A	78623801	78623801	0	6.62e-07	-4.07905	0.807222	8256	Distal non-eGene eQTLs
ENSG00000187775	DNAH17	chr17	78423698	78577394	rs11077385:76620073:A:G	78623991	78623991	0	3.73e-20	8.58948	0.884705	8066	Distal non-eGene eQTLs
ENSG00000267123	CTD-2357A8.3	chr17	78617390	78632057	rs55691740:76622050:T:G	78625968	78625968	0	4.6e-54	-1.02489	0.056545	6089	Distal eGene eQTLs
ENSG00000108679	LGALS3BP	chr17	78971239	78980109	rs3785529	78976878	78976878	0	1.74e-11	6.71382	0.96945	3231	Distal eGene eQTLs
ENSG00000171302	CANT1	chr17	78991718	79009867	rs6501274:76977896:T:A	78981814	78981814	0	1.16e-21	2.15825	0.212828	-1705	Promoter non-eGene eQTLs
ENSG00000176108	CHMP6	chr17	80991599	81009517	rs4969366:79026572:A:G	81052772	81052772	0	9.14e-06	-1.72656	0.384147	-17650	Distal non-eGene eQTLs
ENSG00000183684	ALYREF	chr17	81887845	81891586	rs10677339:79197365:T:TTTG	81223565	81223565	0	1.06e-05	1.06496	0.238694	-566	Promoter non-eGene eQTLs
ENSG00000224877	C17orf89	chr17	81239240	81241281	rs3803767	81252562	81252562	0	3.44e-07	0.627743	0.121079	-1368	Promoter non-eGene eQTLs
ENSG00000262877	RP11-1055B8.4	chr17	81388127	81390256	rs67602958:79378593:G:A	81404793	81404793	0	5.01e-15	-4.89902	0.60179	-14537	Distal eGene eQTLs
ENSG00000280351	CTD-2561B21.8	chr17	81003336	81005132	rs71367062:79480536:G:GC	81513510	81513510	0	8.59e-06	0.274189	0.0608183	-447	Promoter non-eGene eQTLs
ENSG00000204237	OXLD1	chr17	81665037	81666635	rs79482383:79624373:T:C	81657343	81657343	0	1.58e-08	1.22912	0.212976	9292	Distal eGene eQTLs
ENSG00000214087	ARL16	chr17	81681175	81683924	rs12325779:79630217:A:G	81663187	81663187	1	2.37e-05	0.737701	0.172482	-75	Promoter non-eGene eQTLs
ENSG00000185359	HGS	chr17	81683327	81703138	rs80017337:79669884:GGGAA:G	81702854	81702858	1	1.04e-05	-0.423989	0.0949499	-19528	Distal eGene eQTLs
ENSG00000141568	FOXK2	chr17	82519714	82644662	rs138836510:80509109:C:T	82551233	82551233	0	3.96e-06	0.899566	0.192292	-31520	Distal eGene eQTLs
ENSG00000141568	FOXK2	chr17	82519714	82644662	rs8081532:80551319:T:G	82593443	82593443	1	6.32e-06	0.451387	0.0986345	-73730	Distal eGene eQTLs
ENSG00000158270	COLEC12	chr18	316741	500722	exm1371334	334742	334742	0	2.16e-25	7.90339	0.707799	165980	Distal eGene eQTLs
ENSG00000273355	RP11-672L10.6	chr18	813275	813756	rs5822580:813660:C:CT	813659	813659	0	4.34e-37	-0.640848	0.0453417	-385	Promoter-eGene eQTLs
ENSG00000101605	MYOM1	chr18	3066808	3220108	exm2227787	3262786	3262786	0	4.12e-07	0.656535	0.127519	-936	Promoter non-eGene eQTLs
ENSG00000088756	ARHGAP28	chr18	6729719	6915716	rs139993551:6729314:TGCGCGCGCACGCACACACAG:T	6729315	6729335	0	4.01e-10	-0.362008	0.0564472	403	Promoter-eGene eQTLs
ENSG00000272788	RP11-674N23.4	chr18	8801657	8802305	rs62086598:8800095:G:A	8800097	8800097	0	1.26e-08	-0.189263	0.0325642	1559	Promoter-eGene eQTLs
ENSG00000168502	MTCL1	chr18	8705662	8832778	rs632423:8809445:G:C	8809447	8809447	0	1.63e-26	-20.6987	1.80538	-103786	Distal eGene eQTLs
ENSG00000141404	GNAL	chr18	11688957	11885685	rs72881064:11688562:G:A	11688563	11688563	0	1.68e-19	0.812799	0.0853923	393	Promoter-eGene eQTLs
ENSG00000134508	CABLES1	chr18	23134565	23260467	rs80349711:20754224:T:C	23174260	23174260	0	1.09e-05	-2.67605	0.600703	-39696	Distal eGene eQTLs
ENSG00000168234	TTC39C	chr18	23992774	24135610	rs894928:21694225:T:C	24114261	24114261	0	5.01e-19	-39.9756	4.26244	-121488	Distal eGene eQTLs
ENSG00000198795	ZNF521	chr18	25061927	25352190	rs10853651:22751758:A:G	25171794	25171794	1	7.55e-06	-0.325008	0.071635	180396	Distal eGene eQTLs
ENSG00000277534	RP11-9E17.1	chr18	26542972	26545791	exm2253370	26545893	26545893	0	1.12e-10	-0.497207	0.0750469	-102	Promoter-eGene eQTLs
ENSG00000170558	CDH2	chr18	27950967	28177446	rs11564398:25668568:T:C	28088604	28088604	1	7.97e-06	-0.357252	0.0789509	88842	Distal eGene eQTLs
ENSG00000197705	KLHL14	chr18	32672672	32773062	rs34064038:30458624:G:A	32878660	32878660	0	3.08e-19	2.69634	0.285605	-45206	Distal non-eGene eQTLs
ENSG00000172466	ZNF24	chr18	35332213	35345482	rs59654099:32950500:G:A	35370536	35370536	0	3.72e-14	-5.99711	0.763541	6801	Distal non-eGene eQTLs
ENSG00000186496	ZNF396	chr18	35366698	35377337	rs4291985:32957283:C:T	35377319	35377319	0	1.22e-12	-0.567275	0.0773178	18	Promoter-eGene eQTLs
ENSG00000075643	MOCOS	chr18	36187520	36272157	rs676300:33835672:C:A	36255709	36255709	0	2.43e-60	1.09977	0.0562028	-68190	Distal eGene eQTLs
ENSG00000260552	RP11-49I11.1	chr18	36179997	36187448	rs66511016:33835847:GTTTT:G	36255884	36255888	0	4.24e-12	0.148909	0.0208378	-68365	Distal non-eGene eQTLs
ENSG00000132872	SYT4	chr18	43267879	43277650	rs72902415:40859176:A:T	43279211	43279211	0	8.66e-09	-0.746855	0.12702	-1561	Promoter-eGene eQTLs
ENSG00000152240	HAUS1	chr18	46104333	46128333	rs1123604:43245315:G:T	45665350	45665350	1	7.22e-07	-0.504871	0.100265	-452355	Distal non-eGene eQTLs
ENSG00000167306	MYO5B	chr18	49822814	50195093	rs9963529:47498874:T:G	49972504	49972504	0	9.63e-13	0.56842	0.077093	222589	Distal eGene eQTLs
ENSG00000267322	SNHG22	chr18	49814024	49851059	rs9949712:47677840:T:C	50151470	50151470	2	1.96e-05	-0.298148	0.0690043	43623	Distal non-eGene eQTLs
ENSG00000167306	MYO5B	chr18	49822814	50195093	rs77015246:47705364:A:G	50178994	50178994	2	1.21e-06	-1.05244	0.213494	16099	Distal eGene eQTLs
ENSG00000187323	DCC	chr18	52340173	53535903	rs1443568:49880242:A:G	52353872	52353872	0	8.09e-07	-0.274996	0.0548666	-13700	Distal eGene eQTLs
ENSG00000049759	NEDD4L	chr18	58044368	58401540	rs35987145:55786217:G:GC	58118985	58118985	0	2.1e-06	3.13558	0.651343	-74618	Distal eGene eQTLs
ENSG00000198796	ALPK2	chr18	58481248	58628957	rs9953923	58493450	58493450	2	1.21e-07	0.436231	0.0809439	135507	Distal eGene eQTLs
ENSG00000198796	ALPK2	chr18	58481248	58628957	rs9956862:56249362:C:T	58582130	58582130	0	6.48e-55	0.953176	0.0520253	46827	Distal eGene eQTLs
ENSG00000166562	SEC11C	chr18	59139478	59158836	rs113686576:56809604:A:ATTTTATAATTTGC	59142372	59142372	0	2.02e-06	2.66221	0.552122	-2895	Distal eGene eQTLs
ENSG00000166569	CPLX4	chr18	59275157	59318649	rs12232751:56966260:G:A	59299028	59299028	0	1.03e-08	-0.451521	0.0772004	19621	Distal eGene eQTLs
ENSG00000081913	PHLPP1	chr18	62715451	62980433	rs187210763:60383787:T:G	62716554	62716554	0	3.12e-07	6.3167	1.2138	-1104	Promoter-eGene eQTLs
ENSG00000150636	CCDC102B	chr18	68715210	69055189	rs9959894:66402934:T:C	68735697	68735697	0	1.07e-06	0.83155	0.1678	-20488	Distal eGene eQTLs
ENSG00000265579	RP11-713C5.1	chr18	72743757	72745961	rs4892052:70522284:A:G	72855049	72855049	0	2.83e-07	-2.44571	0.468214	13097	Distal non-eGene eQTLs
ENSG00000166342	NETO1	chr18	72742315	72868146	rs34189999:70527964:GT:G	72860729	72860730	0	2.31e-10	-0.455633	0.0700342	7417	Distal eGene eQTLs
ENSG00000141665	FBXO15	chr18	74073354	74147865	rs56309147:71817305:T:C	74150070	74150070	0	1.29e-13	-0.780732	0.101752	-2205	Promoter-eGene eQTLs
ENSG00000180011	ZADH2	chr18	75195109	75209348	rs73478102:72919317:A:G	75207362	75207362	0	1.79e-05	-7.84526	1.80708	1986	Promoter-eGene eQTLs
ENSG00000101493	ZNF516	chr18	76358191	76495190	rs11373027:74149399:A:AT	76437443	76437443	1	2.42e-05	0.301541	0.070588	57747	Distal eGene eQTLs
ENSG00000130856	ZNF236	chr18	76822608	76970727	rs581504:74643176:G:C	76931220	76931220	0	1.91e-13	-0.928114	0.121877	-108613	Distal eGene eQTLs
ENSG00000122490	PQLC1	chr18	79902421	79951664	rs118027503:77687518:G:A	79927518	79927518	1	2.6e-08	0.861364	0.151659	24146	Distal eGene eQTLs
ENSG00000226742	HSBP1L1	chr18	79964562	79970822	rs75287701:77730600:A:G	79970600	79970600	0	7.53e-18	-1.7742	0.196569	-6039	Distal eGene eQTLs
ENSG00000267127	RP11-795F19.5	chr18	80034347	80097088	rs12454507:77825981:A:G	80065981	80065981	0	2.12e-24	0.726833	0.0666905	-31635	Distal eGene eQTLs
ENSG00000261126	RP11-795F19.1	chr18	80046901	80095482	rs9961036:77827299:G:T	80067299	80067299	2	3.17e-11	-0.557658	0.0816516	-20399	Distal eGene eQTLs
ENSG00000261126	RP11-795F19.1	chr18	80046901	80095482	rs9789185:77829398:A:G	80069398	80069398	0	2.08e-24	1.0423	0.0956166	-22498	Distal eGene eQTLs
ENSG00000267251	AC139100.3	chr18	80183681	80202992	rs1050919	80148617	80148617	0	1.15e-23	0.273107	0.0255296	-693	Promoter non-eGene eQTLs
ENSG00000141934	PLPP2	chr19	281041	291504	rs12986214:293346:A:T	293346	293346	0	8.53e-18	18.5785	2.06213	-1842	Promoter-eGene eQTLs
ENSG00000099866	MADCAM1	chr19	489177	505342	rs10414529:488470:C:G	488470	488470	0	7.22e-10	-0.23307	0.0369126	706	Promoter-eGene eQTLs
ENSG00000065268	WDR18	chr19	984272	998438	exm1398247	991129	991129	0	1.24e-27	1.07482	0.0914034	-6858	Distal eGene eQTLs
ENSG00000064666	CNN2	chr19	1026582	1039068	rs12980170:1027286:G:T	1027287	1027287	0	1.05e-11	0.984736	0.140574	-706	Promoter-eGene eQTLs
ENSG00000160953	MUM1	chr19	1354712	1378431	rs72981673:1355350:G:A	1355351	1355351	1	3.6e-07	-0.564059	0.10898	-640	Promoter-eGene eQTLs
ENSG00000160953	MUM1	chr19	1354712	1378431	rs62127614:1365044:G:A	1365045	1365045	0	2e-11	-0.666598	0.0965622	-10334	Distal eGene eQTLs
ENSG00000127540	UQCR11	chr19	1597173	1605490	rs72989714:1593238:C:G	1593239	1593239	0	1.28e-08	-1.43708	0.247352	-438	Promoter non-eGene eQTLs
ENSG00000130270	ATP8B3	chr19	1782076	1812276	rs10418560:1812204:G:A	1812205	1812205	0	3.11e-11	0.51464	0.0753195	71	Promoter-eGene eQTLs
ENSG00000129911	KLF16	chr19	1852400	1863568	rs11880925:1852078:C:G	1852079	1852079	1	2.13e-10	-0.496405	0.0761474	11489	Distal eGene eQTLs
ENSG00000129911	KLF16	chr19	1852400	1863568	rs3746045:1854557:A:G	1854558	1854558	0	1.57e-30	0.916554	0.0732884	9010	Distal eGene eQTLs
ENSG00000099800	TIMM13	chr19	2425625	2427894	rs6945:2426828:G:C	2426830	2426830	0	7.75e-10	0.428775	0.0680377	1064	Promoter-eGene eQTLs
ENSG00000172006	ZNF554	chr19	2819875	2835773	rs11667713:2841718:C:T	2841720	2841720	1	4.78e-09	-0.402815	0.0672955	-285	Promoter non-eGene eQTLs
ENSG00000065717	TLE2	chr19	2997639	3047635	rs522982:2984460:C:T	2984462	2984462	0	1.62e-08	-1.1471	0.198951	-7016	Distal non-eGene eQTLs
ENSG00000125912	NCLN	chr19	3185564	3209575	rs490218:3189634:T:C	3189636	3189636	0	1.08e-10	-0.81455	0.122831	-4073	Distal eGene eQTLs
ENSG00000105325	FZR1	chr19	3506274	3538330	rs10403057:3511946:T:C	3511948	3511948	0	5.97e-21	-2.09682	0.210989	-5675	Distal eGene eQTLs
ENSG00000011132	APBA3	chr19	3750820	3761699	rs3746118:3762498:C:T	3762500	3762500	0	5.82e-06	0.549688	0.119645	-801	Promoter-eGene eQTLs
ENSG00000077463	SIRT6	chr19	4174110	4182604	rs3760907:4183155:T:G	4183158	4183158	0	3.67e-10	0.533025	0.0829192	-554	Promoter-eGene eQTLs
ENSG00000105248	CCDC94	chr19	4247080	4269090	rs11671900	4246696	4246696	0	1.46e-11	0.651614	0.093712	383	Promoter-eGene eQTLs
ENSG00000167674	CTB-50L17.10	chr19	4472288	4502211	rs11673585:4473053:G:C	4473056	4473056	0	5.95e-06	-1.00529	0.219033	-769	Promoter-eGene eQTLs
ENSG00000267709	AC024592.9	chr19	5847468	5858239	rs55669463:5855329:G:T	5855318	5855318	0	4.75e-06	-0.187856	0.0404966	-7851	Distal eGene eQTLs
ENSG00000125656	CLPP	chr19	6361453	6368908	rs200468017:6393565:T:TG	6393554	6393554	0	7.02e-07	1.45169	0.28797	-571	Promoter non-eGene eQTLs
ENSG00000267952	CTD-2207O23.12	chr19	7507053	7519622	rs608144:7573297:T:C	7508411	7508411	0	3.85e-15	-0.556056	0.0679966	-1359	Promoter-eGene eQTLs
ENSG00000076826	CAMSAP3	chr19	7595903	7618304	rs4134813:7694021:A:C	7629135	7629135	0	1.22e-05	0.771296	0.174133	430	Promoter non-eGene eQTLs
ENSG00000229833	PET100	chr19	7629738	7631956	rs10001:7711221:T:C	7646335	7646335	0	7.52e-07	1.08721	0.216273	-9454	Distal non-eGene eQTLs
ENSG00000099785	MARCHF2	chr19	8413271	8439017	rs59319088:8533509:C:T	8468625	8468625	0	1.59e-14	-0.734188	0.0920398	-23858	Distal non-eGene eQTLs
ENSG00000133246	PRAM1	chr19	8490057	8503112	rs73002688:8576947:G:T	8512063	8512063	0	8.92e-06	-0.227706	0.0506034	2101	Promoter non-eGene eQTLs
ENSG00000130803	ZNF317	chr19	9140381	9163424	rs17002013	9140544	9140544	0	6.73e-12	-0.561272	0.0793369	-164	Promoter-eGene eQTLs
ENSG00000188321	ZNF559	chr19	9323773	9351162	rs28384491:9434872:C:T	9324196	9324196	0	5.75e-19	-1.207	0.128942	-424	Promoter-eGene eQTLs
ENSG00000188629	ZNF177	chr19	9363021	9382617	rs28384491:9434872:C:T	9324196	9324196	1	5.92e-07	-0.700297	0.137971	-424	Promoter non-eGene eQTLs
ENSG00000196605	ZNF846	chr19	9751994	9793180	rs147535386:9878986:TG:T	9768310	9768311	0	1.71e-05	1.03394	0.237539	24870	Distal eGene eQTLs
ENSG00000267100	ILF3-AS1	chr19	10651863	10653844	rs199741372:10811807:GC:G	10701131	10701132	0	9.94e-08	5.49255	1.01208	299	Promoter non-eGene eQTLs
ENSG00000198429	ZNF69	chr19	11887785	11914329	rs112387800:11593614:CCT:C	11482799	11482801	0	1.76e-05	0.291794	0.0671463	-1753	Promoter non-eGene eQTLs
ENSG00000197933	ZNF823	chr19	11721266	11739009	rs72986630:11849736:C:T	11738921	11738921	0	2.55e-06	0.49466	0.103647	88	Promoter-eGene eQTLs
ENSG00000223547	ZNF844	chr19	12064700	12081565	rs73514817:12176709:T:C	12065894	12065894	0	1.61e-05	-3.29374	0.754237	-1195	Promoter-eGene eQTLs
ENSG00000173875	ZNF791	chr19	12610919	12633840	rs2861405	12611518	12611518	0	1.05e-25	0.724039	0.0643579	-600	Promoter-eGene eQTLs
ENSG00000095066	HOOK2	chr19	12763004	12872740	rs66630592:13043451:G:A	12932637	12932637	0	1.65e-08	1.67253	0.290199	-2115	Promoter non-eGene eQTLs
ENSG00000105127	AKAP8	chr19	15353386	15379798	rs3826863:15529020:A:G	15418209	15418209	0	3.41e-05	-0.86616	0.20664	932	Promoter non-eGene eQTLs
ENSG00000186204	CYP4F12	chr19	15672758	15697174	rs11669449:15890517:A:C	15779707	15779707	0	1.49e-33	0.581262	0.0438172	202	Promoter non-eGene eQTLs
ENSG00000267594	CYP4F24P	chr19	15760242	15779909	rs56180406:15890800:A:G	15779990	15779990	0	5.27e-56	-0.932106	0.0501885	-81	Promoter-eGene eQTLs
ENSG00000171903	CYP4F11	chr19	15912368	15934867	rs62105762:16044871:T:C	15934061	15934061	1	7.88e-14	-0.540708	0.0698113	806	Promoter-eGene eQTLs
ENSG00000267056	AC005336.4	chr19	15910583	15911824	rs11879253:16045491:G:C	15934681	15934681	0	6.12e-26	-0.78715	0.069582	186	Promoter non-eGene eQTLs
ENSG00000105072	C19orf44	chr19	16496312	16521352	rs3745325:16607305:A:G	16496494	16496494	0	3.37e-22	0.881358	0.08564	-183	Promoter-eGene eQTLs
ENSG00000053501	USE1	chr19	17215347	17219829	rs388484:17326567:A:T	17215758	17215758	0	3.7e-06	0.39472	0.0841047	-412	Promoter-eGene eQTLs
ENSG00000099330	OCEL1	chr19	17226205	17229219	rs3745163:17337555:C:A	17226746	17226746	1	6.43e-13	0.606272	0.0815537	-542	Promoter-eGene eQTLs
ENSG00000160117	ANKLE1	chr19	17281646	17287646	rs73509996:17393449:T:G	17282640	17282640	0	1.51e-19	0.350158	0.0367349	-995	Promoter-eGene eQTLs
ENSG00000130312	MRPL34	chr19	17292610	17306843	rs7252571:17419848:T:C	17309039	17309039	0	1.32e-27	1.45593	0.123886	479	Promoter non-eGene eQTLs
ENSG00000130304	SLC27A1	chr19	17468770	17506168	rs56384297:17566409:G:T	17455600	17455600	0	5.66e-09	1.32081	0.221764	-2631	Distal non-eGene eQTLs
ENSG00000269736	CTD-2521M24.11	chr19	17452212	17452969	rs12460896:17568119:C:T	17457310	17457310	1	7.79e-10	0.464985	0.0737957	-4341	Distal eGene eQTLs
ENSG00000171773	NXNL1	chr19	17455426	17460954	rs73020413:17578930:A:G	17468121	17468121	0	1.28e-18	-0.798136	0.0862172	648	Promoter non-eGene eQTLs
ENSG00000269736	CTD-2521M24.11	chr19	17452212	17452969	rs8109373	17469175	17469175	0	4.43e-13	-0.665319	0.0888275	-406	Promoter non-eGene eQTLs
ENSG00000130475	FCHO1	chr19	17747719	17788568	rs28736584:17858349:A:G	17747540	17747540	0	7.26e-11	0.253534	0.0378639	178	Promoter-eGene eQTLs
ENSG00000130517	PGPEP1	chr19	18340588	18369950	rs7255983:18452759:C:T	18341949	18341949	0	6.52e-13	-0.541444	0.0728528	-1362	Promoter-eGene eQTLs
ENSG00000105696	TMEM59L	chr19	18607431	18621039	rs7247346:18707878:A:C	18597068	18597068	0	1.97e-09	-1.40539	0.228848	10673	Distal non-eGene eQTLs
ENSG00000213999	MEF2B	chr19	19145569	19170289	rs12975253:19279745:A:C	19168936	19168936	0	5.18e-06	-0.326874	0.0707557	1353	Promoter-eGene eQTLs
ENSG00000250067	YJEFN3	chr19	19528862	19537581	rs2965187:19522970:T:A	19412161	19412161	0	2.43e-19	-4.93763	0.521338	-26335	Distal non-eGene eQTLs
ENSG00000266904	CTC-559E9.1	chr19	19757367	19776423	rs1560189:19887108:C:T	19776299	19776299	0	1.78e-09	-1.12981	0.183452	124	Promoter-eGene eQTLs
ENSG00000197124	ZNF682	chr19	19997059	20039506	rs2286923	20039438	20039438	0	3.9e-19	-0.703044	0.074708	68	Promoter-eGene eQTLs
ENSG00000267481	CTC-559E9.5	chr19	19788756	19790531	rs11372918:20151069:T:TA	20040260	20040260	0	9.69e-06	0.201407	0.0449433	-754	Promoter non-eGene eQTLs
ENSG00000197134	ZNF257	chr19	22052453	22091480	rs61426953:22236168:CAAAAAAAA:C	22053366	22053374	1	4.91e-06	0.329314	0.0711024	-914	Promoter-eGene eQTLs
ENSG00000167232	ZNF91	chr19	23304992	23395560	rs60949145:23576503:C:CA	23393701	23393701	0	7.46e-06	4.50692	0.992789	1859	Promoter-eGene eQTLs
ENSG00000213967	ZNF726	chr19	23914877	23945159	rs3764587:24098001:A:C	23915199	23915199	0	1.22e-10	-0.219866	0.033259	-323	Promoter-eGene eQTLs
ENSG00000213096	ZNF254	chr19	24033406	24129961	rs62117628:24218593:G:A	24035791	24035791	0	1.5e-16	1.4131	0.163812	-2386	Promoter-eGene eQTLs
ENSG00000261400	AC011525.2	chr19	31588041	31595720	rs201691720:31766335:C:CT	31275429	31275429	1	1.9e-05	-0.442045	0.102122	74118	Distal non-eGene eQTLs
ENSG00000168813	ZNF507	chr19	32345595	32387667	rs4804990:32837429:C:G	32346523	32346523	0	1.07e-12	1.79997	0.244652	-929	Promoter-eGene eQTLs
ENSG00000213965	NUDT19	chr19	32691962	32713796	rs259294:33169003:A:C	32678097	32678097	0	7.39e-09	1.34815	0.228177	-1500	Promoter non-eGene eQTLs
ENSG00000105186	ANKRD27	chr19	32597008	32676597	rs10417773:33169097:G:T	32678191	32678191	0	1.04e-18	7.21451	0.777084	-1594	Promoter-eGene eQTLs
ENSG00000124299	PEPD	chr19	33386951	33521794	rs5827848:33883821:TA:T	33392915	33392916	0	5.59e-26	0.775476	0.068486	128879	Distal eGene eQTLs
ENSG00000124302	CHST8	chr19	33621956	33773509	rs111786665:34112570:G:C	33621664	33621664	0	2.21e-16	0.451111	0.0526198	291	Promoter-eGene eQTLs
ENSG00000089335	ZNF302	chr19	34677640	34686397	rs2305762	34678635	34678635	1	3.43e-12	-0.555181	0.0773358	-996	Promoter-eGene eQTLs
ENSG00000274104	CTD-2553L13.10	chr19	34733299	34733837	rs7624	34733565	34733565	0	2.33e-05	-0.161658	0.0377585	272	Promoter-eGene eQTLs
ENSG00000168661	ZNF30	chr19	34926904	34945170	rs56093013:35418182:G:A	34927278	34927278	0	3.43e-48	-4.25317	0.25368	-375	Promoter-eGene eQTLs
ENSG00000153902	LGI4	chr19	35124514	35142451	rs10414555:35610960:T:G	35120056	35120056	0	1.06e-05	-1.3516	0.302917	-4177	Distal non-eGene eQTLs
ENSG00000126246	IGFLR1	chr19	35738802	35742453	rs11549030:36246418:C:G	35755517	35755517	0	2.32e-32	1.05093	0.0810387	-951	Promoter non-eGene eQTLs
ENSG00000161265	U2AF1L4	chr19	35742465	35745445	rs11549030:36246418:C:G	35755517	35755517	0	7.53e-57	6.45604	0.344022	-951	Promoter non-eGene eQTLs
ENSG00000197050	ZNF420	chr19	37007858	37130314	rs56263825:37550170:C:CA	37059268	37059268	0	6.3e-06	0.553191	0.120862	-51411	Distal eGene eQTLs
ENSG00000189164	ZNF527	chr19	37371062	37393066	rs71934524:37707988:C:CA	37217086	37217086	0	9.5e-05	-0.533977	0.13543	840	Promoter non-eGene eQTLs
ENSG00000267640	CTD-2554C21.2	chr19	37817360	37832160	rs11671972:37863626:T:G	37372724	37372724	1	8.51e-07	0.376674	0.0753068	-1663	Promoter non-eGene eQTLs
ENSG00000266916	ZNF793-AS1	chr19	37497160	37507046	rs7248733:37996361:A:C	37505459	37505459	0	1.02e-10	-0.596569	0.08985	1587	Promoter-eGene eQTLs
ENSG00000104823	ECH1	chr19	38815423	38832005	exm1464099	38831447	38831447	0	3.37e-15	1.2497	0.152464	558	Promoter-eGene eQTLs
ENSG00000105202	FBL	chr19	39834459	39846414	rs17709688:40334719:T:C	39844079	39844079	0	2.14e-08	-1.59333	0.27877	2335	Promoter-eGene eQTLs
ENSG00000160460	SPTBN4	chr19	40466242	40576464	rs1165839:41076053:T:C	40570147	40570147	0	5e-05	-1.50108	0.366101	-103906	Distal eGene eQTLs
ENSG00000279108	CTC-490E21.11	chr19	40840160	40842039	rs79102501:41106184:T:C	40600278	40600278	0	1.14e-07	0.348858	0.0645972	-7395	Distal non-eGene eQTLs
ENSG00000105341	ATP5SL	chr19	41431319	41440717	rs60285872:41902522:CTTTT:C	41396617	41396621	0	1.38e-08	1.08531	0.187246	843	Promoter non-eGene eQTLs
ENSG00000142046	TMEM91	chr19	41350912	41384083	rs45500792:41903699:T:G	41397794	41397794	0	1.09e-06	-0.428171	0.0864955	-334	Promoter non-eGene eQTLs
ENSG00000167378	IRGQ	chr19	43584370	43596135	rs4803613:43858317:G:A	43354165	43354165	0	7.27e-06	-1.30785	0.287728	-506	Promoter non-eGene eQTLs
ENSG00000073050	XRCC1	chr19	43543041	43580473	rs304729:44084403:G:A	43580251	43580251	2	5.85e-06	0.406609	0.0885233	222	Promoter-eGene eQTLs
ENSG00000204920	ZNF155	chr19	43967863	43998325	rs62116613:44488352:G:A	43984200	43984200	1	4.25e-25	-1.33968	0.120831	-16338	Distal eGene eQTLs
ENSG00000263002	ZNF234	chr19	44141558	44160309	rs4802210	44141595	44141595	0	1.56e-05	0.470087	0.10748	-38	Promoter-eGene eQTLs
ENSG00000170684	ZNF296	chr19	45071501	45076588	rs8100183:45584692:C:T	45081434	45081434	0	1.8e-06	-0.161018	0.0332202	-2239	Promoter non-eGene eQTLs
ENSG00000142252	GEMIN7	chr19	45079196	45091524	rs3178166:45594170:A:G	45090912	45090912	0	1.04e-16	-0.443772	0.0511514	-11717	Distal eGene eQTLs
ENSG00000117877	CD3EAP	chr19	45406210	45410766	rs34014819:45909634:G:T	45406376	45406376	0	6.33e-06	0.684288	0.149539	-167	Promoter-eGene eQTLs
ENSG00000012061	ERCC1	chr19	45407334	45478828	rs2298881:45926916:C:A	45423658	45423658	0	6.61e-10	-0.698913	0.110431	55170	Distal eGene eQTLs
ENSG00000267757	EML2-AS1	chr19	45641495	45642840	rs6509227:46141677:A:G	45638419	45638419	0	2.55e-35	1.17603	0.0858288	3075	Distal eGene eQTLs
ENSG00000012061	ERCC1	chr19	45407334	45478828	rs79775625:46576300:A:G	46073042	46073042	1	3.4e-05	1.09204	0.260498	4076	Distal non-eGene eQTLs
ENSG00000011485	PPP5C	chr19	46346995	46392981	rs7257234:46849476:A:G	46346219	46346219	0	1.12e-06	-3.11128	0.629171	775	Promoter-eGene eQTLs
ENSG00000182013	PNMAL1	chr19	46466492	46471563	rs11880808:46930847:T:C	46427590	46427590	1	1.23e-21	0.66514	0.0656376	1361	Promoter non-eGene eQTLs
ENSG00000182013	PNMAL1	chr19	46466492	46471563	rs8103785:46974762:A:G	46471505	46471505	0	1.08e-40	1.04627	0.0697464	58	Promoter-eGene eQTLs
ENSG00000182013	PNMAL1	chr19	46466492	46471563	rs6509278:46975723:C:T	46472466	46472466	2	8.11e-14	-1.61565	0.208712	-903	Promoter-eGene eQTLs
ENSG00000090372	STRN4	chr19	46719508	46746994	rs12984041:47249296:G:C	46746039	46746039	0	3.32e-12	1.37557	0.191473	955	Promoter-eGene eQTLs
ENSG00000105392	CRX	chr19	47819780	47843330	rs12974951	47842671	47842671	0	1.39e-11	-47.4068	6.81023	-22892	Distal eGene eQTLs
ENSG00000169393	ELSPBP1	chr19	47994652	48025153	rs16982100:48511888:T:G	48008631	48008631	1	2.83e-06	0.73606	0.154948	-13980	Distal eGene eQTLs
ENSG00000188334	BSPH1	chr19	47968047	47992170	rs35439716:48513045:AT:A	48009788	48009789	0	1.19e-22	0.477997	0.0458852	-15137	Distal non-eGene eQTLs
ENSG00000105507	CABP5	chr19	48029954	48044053	rs201980175:48514705:T:TGAC	48011448	48011448	0	5.58e-54	-1.33708	0.0738472	-16797	Distal non-eGene eQTLs
ENSG00000269420	PLA2G4C-AS1	chr19	48061372	48064945	rs201980175:48514705:T:TGAC	48011448	48011448	0	2.03e-32	-1.08455	0.0835369	-16797	Distal non-eGene eQTLs
ENSG00000105499	PLA2G4C	chr19	48047844	48110817	rs186856015:48519804:C:T	48016547	48016547	0	1.51e-07	-0.563799	0.105462	-21896	Distal non-eGene eQTLs
ENSG00000169393	ELSPBP1	chr19	47994652	48025153	rs28412366:48519925:A:G	48016668	48016668	0	4.35e-43	-1.18439	0.076071	-22017	Distal eGene eQTLs
ENSG00000105507	CABP5	chr19	48029954	48044053	rs141506489:48546432:A:AT	48043175	48043175	1	2.36e-07	0.374118	0.0711386	878	Promoter-eGene eQTLs
ENSG00000105373	GLTSCR2	chr19	47745523	47757058	19:48613616:T:A	48110359	48110359	0	1.51e-08	14.293	2.47313	458	Promoter non-eGene eQTLs
ENSG00000105499	PLA2G4C	chr19	48047844	48110817	rs2304244:48898274:C:A	48395017	48395017	1	5.69e-06	-0.406101	0.0882923	-142	Promoter non-eGene eQTLs
ENSG00000105443	CYTH2	chr19	48469033	48482314	rs34527214:48985178:TA:T	48481921	48481922	0	1.31e-15	0.894168	0.107368	-12889	Distal eGene eQTLs
ENSG00000142233	NTN5	chr19	48661408	48673081	rs33988101:49218111:G:T	48714854	48714854	0	1.5e-28	0.741322	0.0617879	4867	Distal non-eGene eQTLs
ENSG00000104888	SLC17A7	chr19	49429402	49442360	rs11673671:49943948:G:C	49440691	49440691	0	1.77e-11	-32.1869	4.64996	1669	Promoter-eGene eQTLs
ENSG00000104870	FCGRT	chr19	49506817	49526333	rs59774409:50016748:C:T	49513491	49513491	0	1.19e-15	1.32878	0.15929	-6675	Distal eGene eQTLs
ENSG00000126456	IRF3	chr19	49659570	49665875	exm1491798	49664469	49664469	0	5.18e-43	1.14756	0.0737897	1406	Promoter-eGene eQTLs
ENSG00000169169	CPT1C	chr19	49690899	49713731	rs1075453:50194399:G:C	49691142	49691142	0	1.05e-15	-0.563947	0.0674634	-244	Promoter-eGene eQTLs
ENSG00000039650	PNKP	chr19	49859883	49878351	rs11365269:50371262:CT:C	49868005	49868006	1	5.75e-06	0.341392	0.0742639	10346	Distal eGene eQTLs
ENSG00000105053	VRK3	chr19	49976468	50025946	rs149219241:50529954:C:T	50026697	50026697	0	4.42e-38	-24.6607	1.71565	-751	Promoter-eGene eQTLs
ENSG00000161671	EMC10	chr19	50476401	50490870	rs10413690:51018126:G:A	50514869	50514869	0	5.75e-08	1.72131	0.311201	-179	Promoter non-eGene eQTLs
ENSG00000167757	KLK11	chr19	51022217	51028039	rs75294470:51309042:T:C	50805785	50805785	0	7.83e-06	0.320801	0.0708329	-856	Promoter non-eGene eQTLs
ENSG00000167747	C19orf48	chr19	50797705	50804929	rs62115583:51309048:T:C	50805791	50805791	0	7.11e-08	0.343276	0.0625176	-862	Promoter-eGene eQTLs
ENSG00000129451	KLK10	chr19	51012740	51020175	rs2569451:51520200:C:T	51016944	51016944	0	5.82e-22	-0.305796	0.0299072	3231	Distal eGene eQTLs
ENSG00000105497	ZNF175	chr19	51571299	51592508	rs4507016	51586471	51586471	0	4.53e-13	-0.533237	0.0712235	-15173	Distal eGene eQTLs
ENSG00000269834	ZNF528-AS1	chr19	52388843	52397766	rs62110447:52801386:G:A	52298133	52298133	2	1.45e-06	-0.581161	0.118819	-956	Promoter non-eGene eQTLs
ENSG00000167766	ZNF83	chr19	52594061	52690496	rs12973313:53179939:C:G	52676686	52676686	2	5.35e-09	0.454903	0.0762489	13810	Distal eGene eQTLs
ENSG00000182986	ZNF320	chr19	52863791	52897693	rs11669971:53400107:G:C	52896854	52896854	0	1.95e-12	-0.724802	0.0997547	839	Promoter-eGene eQTLs
ENSG00000242779	ZNF702P	chr19	52968252	53037898	rs329744:53541112:C:A	53037859	53037859	2	9.46e-06	-0.486645	0.108462	39	Promoter-eGene eQTLs
ENSG00000197497	ZNF665	chr19	53159214	53193386	rs77069861:53696811:A:C	53193558	53193558	0	2.05e-05	0.197347	0.0457798	-172	Promoter-eGene eQTLs
ENSG00000203326	ZNF525	chr19	53330676	53392217	rs12978480:53868816:A:T	53365563	53365563	0	1.31e-12	1.56278	0.213309	-34888	Distal eGene eQTLs
ENSG00000241015	TPM3P9	chr19	53431985	53444670	rs140539137:53927101:ACCTCCTGATCCCC:A	53423848	53423861	3	6.82e-06	-0.613346	0.134524	-34055	Distal non-eGene eQTLs
ENSG00000160336	ZNF761	chr19	53431994	53458261	rs2617763:53935160:G:A	53431907	53431907	1	5.59e-17	-0.618376	0.0705983	86	Promoter-eGene eQTLs
ENSG00000129990	SYT5	chr19	55171200	55180441	rs3848619:55677523:C:T	55166155	55166155	0	2.07e-20	0.585789	0.0598773	567	Promoter non-eGene eQTLs
ENSG00000108107	RPL28	chr19	55385346	55403250	rs12972567:55889802:C:T	55378434	55378434	0	1.07e-16	-6.81224	0.785531	-1598	Promoter non-eGene eQTLs
ENSG00000179954	SSC5D	chr19	55488405	55519098	rs62130160:56000896:G:T	55489529	55489529	0	5.75e-52	1.16663	0.0661301	-1125	Promoter-eGene eQTLs
ENSG00000213015	ZNF580	chr19	55635017	55643469	rs34506180:56154518:GTTT:G	55643152	55643155	0	1.43e-28	-1.39541	0.116249	-8136	Distal eGene eQTLs
ENSG00000240225	ZNF542P	chr19	56368100	56379828	rs2288856:56879974:T:G	56368605	56368605	0	8.63e-11	1.70268	0.255364	-506	Promoter-eGene eQTLs
ENSG00000198046	ZNF667	chr19	56439326	56478065	rs66718632:56985951:G:T	56474582	56474582	0	1.22e-09	0.651169	0.104611	3483	Distal eGene eQTLs
ENSG00000196867	ZFP28	chr19	56538949	56556810	rs4801173:57051394:T:C	56540025	56540025	0	1.02e-08	-1.02425	0.175093	-1077	Promoter-eGene eQTLs
ENSG00000127903	ZNF835	chr19	56661982	56671783	rs10084155:57182549:G:T	56671181	56671181	0	8.79e-07	0.305606	0.0611804	602	Promoter-eGene eQTLs
ENSG00000131845	ZNF304	chr19	57351308	57359898	rs11377329:57875090:G:GC	57363722	57363722	1	3.02e-07	0.430007	0.0825229	-245	Promoter non-eGene eQTLs
ENSG00000188785	ZNF548	chr19	57389851	57402992	rs12974211:57922713:C:G	57411345	57411345	0	1.91e-81	8.1812	0.334726	-182	Promoter non-eGene eQTLs
ENSG00000197128	ZNF772	chr19	57466664	57477570	rs34678661:57988666:A:AGCC	57477298	57477298	0	1.18e-17	-2.39812	0.267465	272	Promoter-eGene eQTLs
ENSG00000121406	ZNF549	chr19	57527326	57557542	rs8111574:58068901:A:G	57557533	57557533	0	2.45e-24	2.43417	0.223703	-30208	Distal eGene eQTLs
ENSG00000179909	ZNF154	chr19	57697368	57709194	rs60703309:58220579:G:GC	57709211	57709211	0	3.64e-12	0.720985	0.100558	-17	Promoter-eGene eQTLs
ENSG00000179909	ZNF154	chr19	57697368	57709194	rs73068539:58326149:C:T	57814781	57814781	1	1.86e-05	1.13638	0.262261	132	Promoter non-eGene eQTLs
ENSG00000198466	ZNF587	chr19	57849858	57865112	rs10410028:58398564:C:T	57887196	57887196	1	1.4e-05	0.596012	0.135488	1878	Promoter non-eGene eQTLs
ENSG00000176293	ZNF135	chr19	58059240	58086310	rs8104122:58565431:C:T	58054063	58054063	0	1.34e-16	0.638128	0.0738458	-20031	Distal non-eGene eQTLs
ENSG00000269473	CTD-2619J13.19	chr19	58440449	58445849	19:58695854:G:GT	58184487	58184487	2	9.46e-05	-0.83431	0.211542	-1458	Promoter non-eGene eQTLs
ENSG00000182318	ZSCAN22	chr19	58327020	58342332	rs149146289:58857883:A:G	58346517	58346517	0	2.04e-06	0.718363	0.149025	1234	Promoter non-eGene eQTLs
ENSG00000131849	ZNF132	chr19	58432815	58440222	rs7259841:58951123:T:C	58439756	58439756	0	4.9e-29	-1.03078	0.0850213	466	Promoter-eGene eQTLs
ENSG00000151353	TMEM18	chr2	667336	677439	rs3749138:677213:G:A	677213	677213	0	1.23e-14	1.9528	0.243695	226	Promoter-eGene eQTLs
ENSG00000130508	PXDN	chr2	1631888	1744852	rs6757166:1821294:A:G	1817522	1817522	0	4.57e-07	-3.09744	0.604039	513738	Distal non-eGene eQTLs
ENSG00000171853	TRAPPC12	chr2	3379676	3485094	rs7601188	3378669	3378669	1	1.06e-08	-0.38939	0.0666345	1006	Promoter-eGene eQTLs
ENSG00000182551	ADI1	chr2	3497362	3519736	rs6751350:3523444:C:A	3519673	3519673	0	6.01e-16	0.710079	0.0841711	63	Promoter-eGene eQTLs
ENSG00000151693	ASAP2	chr2	9206766	9405683	rs10210194:9542215:C:T	9402086	9402086	1	3.35e-09	0.617102	0.102026	-195321	Distal eGene eQTLs
ENSG00000151694	ADAM17	chr2	9488487	9555792	rs12692386:9695906:A:G	9555777	9555777	0	1.36e-95	7.49829	0.26965	15	Promoter-eGene eQTLs
ENSG00000172059	KLF11	chr2	10042850	10054836	rs372827624:10183748:TGCC:T	10043621	10043624	1	6.69e-07	0.387305	0.0766811	-772	Promoter-eGene eQTLs
ENSG00000134324	LPIN1	chr2	11677596	11827409	rs3795974	11784824	11784824	0	3.89e-85	1.11536	0.0440693	-107229	Distal eGene eQTLs
ENSG00000071575	TRIB2	chr2	12716890	12742734	rs77773048:12858078:G:A	12717952	12717952	0	2.68e-10	17.3276	2.67358	-1063	Promoter-eGene eQTLs
ENSG00000225649	AC064875.2	chr2	12966785	13007013	rs13427697:13147154:T:C	13007029	13007029	0	3.32e-10	-0.498256	0.0773058	-16	Promoter-eGene eQTLs
ENSG00000079785	DDX1	chr2	15591179	15631111	rs73915402:15732238:G:C	15592114	15592114	0	1.15e-22	0.937881	0.0899961	-936	Promoter-eGene eQTLs
ENSG00000118960	HS1BP3	chr2	20560449	20651089	rs4666317:20815185:C:T	20615425	20615425	0	7.76e-09	0.409238	0.069368	35664	Distal eGene eQTLs
ENSG00000084676	NCOA1	chr2	24491915	24770702	rs1135342:24714831:G:T	24491962	24491962	0	1.33e-08	-5.61579	0.967872	-48	Promoter-eGene eQTLs
ENSG00000224165	DNAJC27-AS1	chr2	24971391	25039694	rs10598706:25196330:TTTTTTG:T	24973461	24973467	1	3.18e-06	-0.354649	0.0750493	-2071	Promoter-eGene eQTLs
ENSG00000138029	HADHB	chr2	26243171	26290468	rs6761770:26462937:C:G	26240069	26240069	0	6.29e-31	-13.8429	1.09802	3101	Distal eGene eQTLs
ENSG00000171303	KCNK3	chr2	26692691	26733420	rs67888806:26852805:A:C	26629937	26629937	0	3.35e-18	-2.5698	0.281408	11431	Distal non-eGene eQTLs
ENSG00000138030	KHK	chr2	27086748	27100772	rs11126836	27050260	27050260	0	4.24e-20	-0.47579	0.0490878	4	Promoter non-eGene eQTLs
ENSG00000143994	ABHD1	chr2	27123790	27130812	rs113053199:27374263:C:T	27151395	27151395	0	3.22e-06	0.192382	0.0407307	-2391	Promoter non-eGene eQTLs
ENSG00000138002	IFT172	chr2	27444372	27489789	exm2265307	27489026	27489026	0	4.09e-10	-3.94352	0.615197	763	Promoter-eGene eQTLs
ENSG00000179270	C2orf71	chr2	29060977	29074261	rs7585244:29283509:C:T	29060643	29060643	0	1.2e-06	19.2156	3.89728	13618	Distal eGene eQTLs
ENSG00000213626	LBH	chr2	30231532	30323730	rs906866:30478185:T:C	30255319	30255319	0	4.04e-34	-25.4992	1.90206	-23788	Distal eGene eQTLs
ENSG00000150938	CRIM1	chr2	36355927	36551135	rs3770955:36595271:A:T	36368128	36368128	0	4.2e-09	-5.85034	0.973615	-12202	Distal eGene eQTLs
ENSG00000115825	PRKD3	chr2	37250503	37324808	rs4670688	37313917	37313917	1	4.97e-14	0.627161	0.0802771	10891	Distal eGene eQTLs
ENSG00000115825	PRKD3	chr2	37250503	37324808	exm187359	37316401	37316401	3	7.78e-06	-0.724848	0.160001	8407	Distal eGene eQTLs
ENSG00000115828	QPCT	chr2	37344575	37373322	rs6711685:37548757:G:C	37321614	37321614	0	1.14e-14	-0.974947	0.121493	3194	Distal non-eGene eQTLs
ENSG00000115841	RMDN2	chr2	37923188	38067142	rs6738875:38153486:T:A	37926343	37926343	0	1.16e-49	1.27111	0.0742988	-3156	Distal eGene eQTLs
ENSG00000162878	PKDCC	chr2	42048021	42058528	rs4952398:42288769:T:G	42061629	42061629	0	2.86e-10	-12.1005	1.87021	-13609	Distal eGene eQTLs
ENSG00000223658	C1GALT1C1L	chr2	43675152	43676322	rs13001285:43903787:T:A	43676648	43676648	0	1.78e-13	0.38397	0.0503547	-326	Promoter-eGene eQTLs
ENSG00000236502	SIX3-AS1	chr2	44940155	44941873	rs1561227	44938250	44938250	0	3.42e-14	-0.801551	0.101893	3623	Distal eGene eQTLs
ENSG00000138083	SIX3	chr2	44941899	44946077	exm2255385	44944703	44944703	0	5.53e-07	-3.34875	0.657972	-2805	Distal eGene eQTLs
ENSG00000116016	EPAS1	chr2	46293668	46386703	rs2711302:46220888:A:G	45993749	45993749	0	1.37e-06	19.8654	4.05085	-342404	Distal non-eGene eQTLs
ENSG00000250565	ATP6V1E2	chr2	46490751	46542557	rs3754553:46769135:T:C	46541996	46541996	0	5e-21	-0.873365	0.0876863	561	Promoter-eGene eQTLs
ENSG00000162869	PPP1R21	chr2	48440599	48515391	rs78538011:48668290:C:T	48441151	48441151	0	7.67e-13	-1.08612	0.146623	-553	Promoter-eGene eQTLs
ENSG00000115310	RTN4	chr2	54972188	55112621	rs2255112:55200800:T:G	54973664	54973664	0	1.66e-33	-68.0762	5.13628	138957	Distal eGene eQTLs
ENSG00000162994	CLHC1	chr2	55174792	55232563	rs17046778:55459373:T:G	55232237	55232237	0	2.96e-20	0.884731	0.0908524	326	Promoter-eGene eQTLs
ENSG00000272606	RP11-554J4.1	chr2	55617910	55618373	rs10200159:55845109:T:C	55617974	55617974	0	3.36e-18	-0.923364	0.101114	-65	Promoter-eGene eQTLs
ENSG00000162929	KIAA1841	chr2	61065872	61138034	rs112552455:61293199:C:T	61066064	61066064	0	1.98e-06	1.48992	0.308724	-193	Promoter-eGene eQTLs
ENSG00000173209	AHSA2	chr2	61177419	61191203	rs2600667:61404931:A:T	61177796	61177796	0	9.84e-37	-0.939949	0.0669131	-378	Promoter-eGene eQTLs
ENSG00000170264	FAM161A	chr2	61824855	61854143	rs368470075:62075959:A:T	61848824	61848824	0	2.34e-14	1.35366	0.170885	5319	Distal eGene eQTLs
ENSG00000186889	TMEM17	chr2	62500222	62511894	exm197134	62506054	62506054	0	2.3e-12	-0.596895	0.0824407	5840	Distal eGene eQTLs
ENSG00000115902	SLC1A4	chr2	64988478	65023865	rs113756095:64684769:C:A	64457635	64457635	1	1.96e-05	1.0576	0.24476	-7539	Distal non-eGene eQTLs
ENSG00000115902	SLC1A4	chr2	64988478	65023865	rs7585341:65220909:T:C	64993775	64993775	0	6.95e-25	1.00587	0.0911971	-5298	Distal eGene eQTLs
ENSG00000143971	ETAA1	chr2	67397320	67410545	rs76623705:67624799:C:G	67397667	67397667	0	9.6e-06	1.20159	0.268009	-348	Promoter-eGene eQTLs
ENSG00000221823	PPP3R1	chr2	68178858	68256237	rs12994570	68186216	68186216	0	4.92e-17	0.668732	0.0761985	70021	Distal eGene eQTLs
ENSG00000221823	PPP3R1	chr2	68178858	68256237	rs145256468:68429538:TTTG:T	68202406	68202409	2	3.41e-05	0.319931	0.0763309	53831	Distal eGene eQTLs
ENSG00000273275	RP11-474G23.2	chr2	68179834	68180532	rs70949683:68431485:G:GAT	68204353	68204353	0	1.75e-09	-0.167309	0.0271511	48517	Distal non-eGene eQTLs
ENSG00000119865	CNRIP1	chr2	68284172	68320051	rs13025842:68546449:G:A	68319317	68319317	0	2.2e-05	1.80859	0.421193	734	Promoter-eGene eQTLs
ENSG00000231386	AC007395.4	chr2	70810799	70811474	rs10198077:70781174:C:T	70554042	70554042	1	1.03e-05	-0.520234	0.116465	151	Promoter non-eGene eQTLs
ENSG00000152672	CLEC4F	chr2	70808644	70820600	rs66468957:71114291:T:C	70887161	70887161	0	2.59e-47	-12.586	0.759962	710	Promoter non-eGene eQTLs
ENSG00000231386	AC007395.4	chr2	70810799	70811474	rs66468957:71114291:T:C	70887161	70887161	0	1.47e-11	-0.870211	0.125178	710	Promoter non-eGene eQTLs
ENSG00000116031	CD207	chr2	70830215	70835822	rs66468957:71114291:T:C	70887161	70887161	0	1.95e-36	-1.51855	0.108661	710	Promoter non-eGene eQTLs
ENSG00000144031	ANKRD53	chr2	70978381	70985499	rs60499273:71204588:T:TAGACCACGGTCCGCC	70977458	70977458	0	2.2e-07	-0.424058	0.0804211	922	Promoter-eGene eQTLs
ENSG00000144043	TEX261	chr2	70985939	70994945	rs7583998:71217538:G:A	70990408	70990408	0	2.02e-08	6.98111	1.2192	4537	Distal eGene eQTLs
ENSG00000124357	NAGK	chr2	71064345	71079805	rs2287331:71294552:A:G	71067422	71067422	1	2.77e-07	-0.409709	0.0783693	-3078	Distal eGene eQTLs
ENSG00000075292	ZNF638	chr2	71276562	71435069	rs17743415:71562503:T:C	71335373	71335373	0	1.19e-18	-10.3414	1.11598	-58812	Distal eGene eQTLs
ENSG00000163013	FBXO41	chr2	73254683	73284431	rs13020419:73440902:T:C	73213774	73213774	0	6.93e-09	1.03081	0.174133	448	Promoter non-eGene eQTLs
ENSG00000236209	AC104135.2	chr2	74919556	74924846	rs12366:75185856:G:T	74958729	74958729	0	2.12e-62	0.459462	0.0229268	-237	Promoter non-eGene eQTLs
ENSG00000115350	POLE4	chr2	74958493	74970128	rs186105805:75188803:T:C	74961676	74961676	1	1.34e-05	-0.977718	0.221788	-3184	Distal eGene eQTLs
ENSG00000115423	DNAH6	chr2	84516456	84819589	rs7561462:84686757:A:G	84459633	84459633	0	5.03e-44	-2.61013	0.165296	412	Promoter non-eGene eQTLs
ENSG00000152291	TGOLN2	chr2	85318021	85328425	exm206855	85326957	85326957	0	2.57e-13	-4.20615	0.555531	1468	Promoter-eGene eQTLs
ENSG00000115486	GGCX	chr2	85544724	85561547	rs10700825:85773654:C:CTG	85546531	85546531	0	1.73e-64	4.86982	0.237328	15016	Distal eGene eQTLs
ENSG00000168887	C2orf68	chr2	85606655	85612066	rs374731788:85840085:CT:C	85612962	85612963	0	2.39e-07	1.13263	0.21546	-896	Promoter-eGene eQTLs
ENSG00000168883	USP39	chr2	85602857	85649282	rs11544042:85843348:C:T	85616225	85616225	0	1.4e-12	-2.84583	0.388949	-13369	Distal eGene eQTLs
ENSG00000121152	NCAPH	chr2	96335788	96373845	rs4907311:97011362:C:T	96345624	96345624	0	7.44e-52	0.7121	0.0404244	-9837	Distal eGene eQTLs
ENSG00000158158	CNNM4	chr2	96760903	96811891	rs145496851:97194637:A:C	96528900	96528900	0	1.93e-16	32.7289	3.80925	3406	Distal non-eGene eQTLs
ENSG00000170500	LONRF2	chr2	100273292	100322733	rs184118488:100938205:G:A	100321743	100321743	1	1.81e-05	0.531596	0.122506	990	Promoter-eGene eQTLs
ENSG00000175874	CREG2	chr2	101345552	101387595	rs116287156:102003962:T:C	101387500	101387500	0	2.5e-07	0.42157	0.0803288	95	Promoter-eGene eQTLs
ENSG00000163006	CCDC138	chr2	108786758	108885477	rs201191699:109422472:AGT:A	108806016	108806018	0	1.58e-12	0.627009	0.085916	-19259	Distal eGene eQTLs
ENSG00000153094	BCL2L11	chr2	111119379	111168447	rs12233011:112641283:A:G	111883706	111883706	0	6.92e-10	-0.459659	0.0727173	984	Promoter non-eGene eQTLs
ENSG00000144152	FBLN7	chr2	112138386	112188216	rs4849050	112181971	112181971	1	1.08e-05	0.446641	0.100205	-43586	Distal eGene eQTLs
ENSG00000231747	AC079922.2	chr2	112621810	112622167	exm2265342	112631655	112631655	0	3.06e-18	-0.837277	0.0915657	-9488	Distal eGene eQTLs
ENSG00000144136	SLC20A1	chr2	112645858	112663827	exm2265342	112631655	112631655	0	4.07e-17	7.8945	0.896936	-9488	Distal non-eGene eQTLs
ENSG00000189223	PAX8-AS1	chr2	113211523	113276581	rs2277884:114035750:C:A	113278173	113278173	2	2.2e-05	-0.588315	0.137	-66651	Distal eGene eQTLs
ENSG00000088205	DDX18	chr2	117814651	117832379	rs11689073:118573396:A:G	117815820	117815820	0	1.89e-09	2.1247	0.345572	-1170	Promoter-eGene eQTLs
ENSG00000226479	TMEM185B	chr2	120221279	120223408	exm2273819	120222852	120222852	0	1.54e-12	-0.678827	0.0929619	556	Promoter-eGene eQTLs
ENSG00000260634	RP11-521O16.1	chr2	127024253	127025723	rs934826:127825968:G:A	127068392	127068392	0	5.98e-10	0.166119	0.0261768	38963	Distal non-eGene eQTLs
ENSG00000136717	BIN1	chr2	127048028	127107355	rs10538293:127863046:T:C	127105470	127105470	0	1.62e-19	0.62676	0.0658168	1885	Promoter-eGene eQTLs
ENSG00000136717	BIN1	chr2	127048028	127107355	rs10189896:127866347:G:A	127108771	127108771	1	2.35e-06	-0.346232	0.0722777	-1416	Promoter-eGene eQTLs
ENSG00000173272	MZT2A	chr2	131464901	131492743	rs12988424:132250093:T:G	131492520	131492520	1	4.11e-05	-0.374983	0.0904135	223	Promoter-eGene eQTLs
ENSG00000082258	CCNT2	chr2	134918236	134959342	rs66839618:135678923:A:AT	134921353	134921353	0	3.22e-09	2.55762	0.422351	-3118	Distal eGene eQTLs
ENSG00000144224	UBXN4	chr2	135741620	135785055	rs67886411:136501964:CAAATT:C	135744394	135744399	0	1.96e-07	-19.4947	3.68166	-2775	Distal eGene eQTLs
ENSG00000237772	AC092620.3	chr2	138604511	138613167	rs35595094:139325556:G:A	138567986	138567986	0	3.46e-06	-0.774019	0.16442	-66185	Distal non-eGene eQTLs
ENSG00000168702	LRP1B	chr2	140231424	142131701	rs10211565	142131585	142131585	0	3.53e-17	-0.574209	0.0650987	116	Promoter-eGene eQTLs
ENSG00000115919	KYNU	chr2	142877499	143055832	rs444863:143784193:A:G	143026624	143026624	0	7.56e-12	-0.199822	0.0283186	-149126	Distal eGene eQTLs
ENSG00000184898	RBM43	chr2	151247941	151261879	rs2278089	151290158	151290158	0	9.61e-06	-0.352585	0.0786462	-101	Promoter non-eGene eQTLs
ENSG00000144283	PKP4	chr2	158456965	158682879	rs76635962:159250254:A:T	158393742	158393742	1	1.37e-05	1.34492	0.30539	63011	Distal non-eGene eQTLs
ENSG00000196151	WDSUB1	chr2	159235794	159286799	rs72229999:160143010:ACGCCCCGCGCGAGCAGGCCCAGC:A	159286499	159286522	0	2.22e-43	-1.71091	0.109402	300	Promoter-eGene eQTLs
ENSG00000054219	LY75	chr2	159803356	159904749	rs66496937:160738509:A:G	159881998	159881998	0	2.41e-18	-1.2442	0.135603	22751	Distal eGene eQTLs
ENSG00000115290	GRB14	chr2	164492813	164621848	rs12692723:165437736:C:G	164581226	164581226	0	8.17e-07	-0.407963	0.0814262	40622	Distal eGene eQTLs
ENSG00000115339	GALNT3	chr2	165747592	165794682	rs16851176	165864109	165864109	0	8.87e-21	0.956012	0.0966772	89734	Distal non-eGene eQTLs
ENSG00000198648	STK39	chr2	167954021	168248141	rs11890527:169031488:T:C	168174978	168174978	0	2.66e-12	-0.605037	0.0838198	73163	Distal eGene eQTLs
ENSG00000198648	STK39	chr2	167954021	168248141	rs6755369:169036091:G:A	168179581	168179581	1	1.13e-11	0.689233	0.0985563	68560	Distal eGene eQTLs
ENSG00000081479	LRP2	chr2	169127110	169362685	rs36016897:170077170:CA:C	169220660	169220661	0	1.09e-36	111.427	7.93828	142025	Distal eGene eQTLs
ENSG00000163093	BBS5	chr2	169479179	169506655	rs11901329:170336659:T:C	169480149	169480149	0	4.55e-07	-2.97273	0.579627	-971	Promoter-eGene eQTLs
ENSG00000091428	RAPGEF4	chr2	172735275	173052893	rs1991174:173735180:G:C	172870452	172870452	1	3.19e-06	-0.333969	0.0706838	-135178	Distal eGene eQTLs
ENSG00000154518	ATP5G3	chr2	175176259	175184607	rs58350508:176042379:TGGAC:T	175177651	175177655	0	8.38e-35	-8.11648	0.597908	6956	Distal eGene eQTLs
ENSG00000128655	PDE11A	chr2	177623253	178108339	2:179348068:A:T	178483341	178483341	2	5.18e-06	-0.827111	0.17903	-4741	Distal non-eGene eQTLs
ENSG00000144331	ZNF385B	chr2	179441983	179861505	rs10171283:180308335:C:G	179443608	179443608	0	4.78e-09	-5.29354	0.884344	417897	Distal eGene eQTLs
ENSG00000163492	CCDC141	chr2	178830270	179050086	rs114357768:180603970:T:C	179739243	179739243	1	2.21e-05	-1.2088	0.281546	122262	Distal non-eGene eQTLs
ENSG00000163510	CWC22	chr2	179944877	180007113	rs4894145:180872251:A:T	180007524	180007524	0	7.63e-26	3.13186	0.277474	-411	Promoter-eGene eQTLs
ENSG00000188452	CERKL	chr2	181536677	181680665	rs200917645:182416280:TA:T	181551553	181551554	0	1.86e-08	-3.61569	0.629844	129112	Distal eGene eQTLs
ENSG00000162992	NEUROD1	chr2	181673089	181680876	rs6709122:182507723:G:C	181642996	181642996	0	2.56e-14	20.1607	2.54932	37669	Distal non-eGene eQTLs
ENSG00000138449	SLC40A1	chr2	189560580	189583758	rs56208508:190442589:T:TGCCTCA	189577863	189577863	0	3.18e-11	0.800882	0.117278	5895	Distal eGene eQTLs
ENSG00000187699	C2orf88	chr2	189879610	190203484	rs115770474:190663606:C:G	189798880	189798880	0	5.3e-05	0.630073	0.154195	-14795	Distal non-eGene eQTLs
ENSG00000151689	INPP1	chr2	190343471	190371665	rs1372054:191208347:G:A	190343621	190343621	0	8.92e-15	-0.611708	0.0759038	-151	Promoter-eGene eQTLs
ENSG00000196290	NIF3L1	chr2	200889328	200903930	rs79446796:201716749:G:A	200852026	200852026	0	5.41e-05	3.96904	0.972573	11221	Distal non-eGene eQTLs
ENSG00000138400	MDH1B	chr2	206737764	206765547	rs144589732:207629963:G:T	206765239	206765239	1	1.86e-15	-2.1936	0.264948	308	Promoter-eGene eQTLs
ENSG00000118260	CREB1	chr2	207529738	207603431	rs141006395:208491129:C:CTTTTGTTTTTGT	207626405	207626405	0	5.99e-05	-1.47188	0.36285	-477	Promoter non-eGene eQTLs
ENSG00000138376	BARD1	chr2	214725647	214809711	rs11463562:215673218:G:GA	214808494	214808494	1	4.5e-15	0.596314	0.0731163	1217	Promoter-eGene eQTLs
ENSG00000138376	BARD1	chr2	214725647	214809711	rs114860453:215674619:G:C	214809895	214809895	2	1.03e-11	0.850116	0.121308	-184	Promoter-eGene eQTLs
ENSG00000138363	ATIC	chr2	215311818	215349773	rs11550205:216176843:C:T	215312120	215312120	1	3.9e-06	-1.07516	0.229658	-303	Promoter-eGene eQTLs
ENSG00000118242	MREG	chr2	215942806	216034096	rs13030243:216807227:C:T	215942504	215942504	1	1.47e-09	0.595224	0.0961337	91592	Distal eGene eQTLs
ENSG00000118242	MREG	chr2	215942806	216034096	rs4622721	215961413	215961413	0	1.36e-11	0.892095	0.128099	72683	Distal eGene eQTLs
ENSG00000144452	ABCA12	chr2	214931543	215138428	rs34089302:216870130:T:TG	216005407	216005407	0	2.3e-05	-0.379117	0.0884873	28689	Distal non-eGene eQTLs
ENSG00000079246	XRCC5	chr2	216107465	216206303	rs41297758:216979898:TTG:T	216115175	216115177	0	4.14e-18	-0.588734	0.0646648	-7711	Distal eGene eQTLs
ENSG00000279348	RP11-566E18.1	chr2	216211405	216213519	rs116325904:217011871:A:G	216147148	216147148	0	2.14e-31	4.35623	0.342317	-39684	Distal non-eGene eQTLs
ENSG00000135912	TTLL4	chr2	218710846	218755416	rs3770211:219269729:G:T	218405006	218405006	0	8.94e-08	3.1564	0.579453	-6750	Distal non-eGene eQTLs
ENSG00000144580	CNOT9	chr2	218568581	218597080	rs57264314:219478115:CAA:C	218613392	218613394	1	1.11e-05	-0.316538	0.0711195	-5627	Distal non-eGene eQTLs
ENSG00000135925	WNT10A	chr2	218880364	218899581	rs3840475:219743789:TC:T	218879067	218879068	0	7.43e-08	-0.406806	0.0742014	1296	Promoter-eGene eQTLs
ENSG00000135929	CYP27A1	chr2	218781750	218815293	rs143248068:219748212:G:A	218883490	218883490	0	2.88e-05	-4.63868	1.09624	-3127	Distal non-eGene eQTLs
ENSG00000235024	AC097468.7	chr2	218944630	218961903	rs359981:219828118:T:C	218963396	218963396	0	1.01e-05	-0.29731	0.0664905	-1493	Promoter-eGene eQTLs
ENSG00000127824	TUBA4A	chr2	219249712	219278170	rs1109866	219218557	219218557	0	1.15e-14	9.59319	1.19577	433	Promoter non-eGene eQTLs
ENSG00000072182	ASIC4	chr2	219514171	219538772	rs56171119:220386815:C:T	219522093	219522093	0	7.71e-07	-2.02111	0.402454	-7923	Distal eGene eQTLs
ENSG00000042304	C2orf83	chr2	227610091	227633320	rs11675786:228498926:T:A	227634210	227634210	2	2.73e-10	0.82634	0.127567	-890	Promoter-eGene eQTLs
ENSG00000135917	SLC19A3	chr2	227685211	227718012	rs4972919:228582746:G:A	227718030	227718030	3	2.52e-05	0.325132	0.0762777	-18	Promoter-eGene eQTLs
ENSG00000185404	SP140L	chr2	230327185	230403732	rs35392774:230847090:C:T	229982374	229982374	0	2.05e-08	-0.447167	0.0781302	-60072	Distal non-eGene eQTLs
ENSG00000135916	ITM2C	chr2	230864640	230879248	rs1866230:231736641:C:T	230871926	230871926	1	1.46e-05	0.298956	0.0681275	-7287	Distal eGene eQTLs
ENSG00000181798	LINC00471	chr2	231508427	231514339	rs28685161:232378792:C:T	231514081	231514081	0	1.15e-45	-0.499725	0.0308919	258	Promoter-eGene eQTLs
ENSG00000283312	RP11-562I5.1	chr2	231493709	231495299	rs28685161:232378792:C:T	231514081	231514081	0	7.21e-61	-1.57052	0.0797667	258	Promoter non-eGene eQTLs
ENSG00000171596	NMUR1	chr2	231523161	231530495	rs12464121:232379712:A:G	231515001	231515001	0	6.01e-32	6.22681	0.484024	-662	Promoter non-eGene eQTLs
ENSG00000144524	COPS7B	chr2	231781672	231809254	rs17199642:232609805:A:G	231745095	231745095	0	6.01e-15	-1.87527	0.231088	41177	Distal non-eGene eQTLs
ENSG00000259793	RP11-400N9.1	chr2	233351133	233353416	rs7422272:234268308:A:C	233359662	233359662	0	2.67e-13	0.378562	0.0500383	-6246	Distal eGene eQTLs
ENSG00000085982	USP40	chr2	233475521	233566782	rs73115402:234313188:T:C	233404542	233404542	2	3.94e-08	1.02212	0.182457	-50035	Distal non-eGene eQTLs
ENSG00000085982	USP40	chr2	233475521	233566782	rs4233627:234437180:T:C	233528534	233528534	0	4.17e-31	-0.966812	0.0764136	38248	Distal eGene eQTLs
ENSG00000130147	SH3BP4	chr2	234951974	235055714	rs10929075:235862900:A:G	234954256	234954256	0	2.47e-09	1.37189	0.224828	-2283	Promoter-eGene eQTLs
ENSG00000235529	AGAP1-IT1	chr2	235505752	235507566	rs885539	235507601	235507601	0	1.75e-26	-0.725485	0.0633211	-1850	Promoter-eGene eQTLs
ENSG00000157985	AGAP1	chr2	235494090	236131800	rs12465126:236585493:A:G	235676849	235676849	0	5.2e-10	-13.8059	2.16744	-182760	Distal eGene eQTLs
ENSG00000144488	ESPNL	chr2	238100158	238133287	rs13382446:239036270:C:T	238127629	238127629	1	2.16e-08	0.590614	0.103373	-27472	Distal eGene eQTLs
ENSG00000115687	PASK	chr2	241106100	241150264	rs3806599	241149506	241149506	1	3.49e-11	-0.550621	0.0808075	758	Promoter-eGene eQTLs
ENSG00000168385	SEPTIN2	chr2	241315101	241354027	rs3755397:242294913:A:G	241355498	241355498	0	1.62e-49	1.5689	0.0918871	745	Promoter non-eGene eQTLs
ENSG00000168395	ING5	chr2	241687086	241729478	rs7370850:242625935:G:C	241686520	241686520	0	1.2e-06	1.00088	0.202961	565	Promoter-eGene eQTLs
ENSG00000196476	C20orf96	chr20	270864	290778	rs6035784:270428:C:T	289787	289787	0	3.9e-07	-0.375913	0.0728591	991	Promoter-eGene eQTLs
ENSG00000185019	UBOX5	chr20	3107574	3160196	rs13041542:3139383:G:A	3158737	3158737	0	3.97e-15	0.851003	0.104119	1459	Promoter-eGene eQTLs
ENSG00000171867	PRNP	chr20	4686237	4701590	rs6107515:4671381:T:G	4690735	4690735	0	8.02e-08	12.8027	2.34144	-4499	Distal eGene eQTLs
ENSG00000089057	SLC23A2	chr20	4852357	5010293	rs6053018:4971886:G:C	4991240	4991240	0	1.8e-09	23.1065	3.75271	19053	Distal eGene eQTLs
ENSG00000088766	CRLS1	chr20	6006091	6040053	rs6053824:5985393:A:G	6004747	6004747	0	3.39e-12	-0.50412	0.0702016	1343	Promoter-eGene eQTLs
ENSG00000132639	SNAP25	chr20	10218831	10307418	rs2184146:10205305:A:G	10224657	10224657	0	8.26e-06	43.6593	9.66543	-5827	Distal eGene eQTLs
ENSG00000101384	JAG1	chr20	10637685	10674107	rs2423508:10617156:T:G	10636508	10636508	0	2.61e-10	-5.46236	0.84231	37599	Distal eGene eQTLs
ENSG00000149346	SLX4IP	chr20	10435304	10636829	rs7828	10638366	10638366	0	5.73e-12	1.35332	0.190619	-203063	Distal eGene eQTLs
ENSG00000089177	KIF16B	chr20	16272105	16573434	rs11087176:16553107:TC:T	16572462	16572463	0	1.27e-17	0.573763	0.0640573	972	Promoter-eGene eQTLs
ENSG00000125871	MGME1	chr20	17968914	17991122	rs8121408	17972928	17972928	0	1.52e-09	-0.646919	0.104567	-4015	Distal eGene eQTLs
ENSG00000089101	CFAP61	chr20	20052515	20360702	rs6075607:20033755:C:T	20053111	20053111	0	1.78e-12	-0.471463	0.0647605	-597	Promoter-eGene eQTLs
ENSG00000125814	NAPB	chr20	23374520	23421519	rs1003417:23348007:T:A	23367370	23367370	0	1.19e-68	-1.02496	0.0477276	-5188	Distal non-eGene eQTLs
ENSG00000154930	ACSS1	chr20	25006231	25058980	rs7265721:25038231:G:T	25057595	25057595	0	4.89e-06	1.00654	0.217279	1385	Promoter-eGene eQTLs
ENSG00000100987	VSX1	chr20	25070886	25082365	rs6076315:25065518:G:A	25084882	25084882	0	3.95e-19	-6.69142	0.711167	-2517	Distal eGene eQTLs
ENSG00000131067	GGT7	chr20	34844721	34872860	rs36024514:33357648:TGAC:T	34769845	34769848	0	1.97e-07	-0.378127	0.0714195	55804	Distal non-eGene eQTLs
ENSG00000101464	PIGU	chr20	34560543	34698790	rs11482821:33392309:C:CA	34804506	34804506	0	3.96e-07	0.582243	0.112914	21143	Distal non-eGene eQTLs
ENSG00000100983	GSS	chr20	34928431	34955817	rs2064453:33460810:T:C	34873007	34873007	0	5.05e-07	0.831959	0.162881	-861	Promoter non-eGene eQTLs
ENSG00000100991	TRPC4AP	chr20	35002405	35092871	rs1885115:33681256:G:A	35093453	35093453	0	2.36e-07	-1.87341	0.356247	-582	Promoter-eGene eQTLs
ENSG00000214078	CPNE1	chr20	35626032	35664956	rs6060524:34221155:G:T	35633233	35633233	0	2.66e-29	-7.01097	0.575049	31723	Distal eGene eQTLs
ENSG00000149639	SOGA1	chr20	36777443	36863686	rs6101995:35362139:C:T	36733736	36733736	0	1.85e-06	2.87649	0.594206	12342	Distal non-eGene eQTLs
ENSG00000132793	LPIN3	chr20	41340921	41360582	rs6129731	41032047	41032047	0	6.83e-09	0.447208	0.0755108	-3229	Distal non-eGene eQTLs
ENSG00000174306	ZHX3	chr20	41178449	41317672	rs8122094:39681683:C:G	41053043	41053043	0	3.86e-05	1.69767	0.407907	-24225	Distal non-eGene eQTLs
ENSG00000132823	OSER1	chr20	44196497	44210791	rs17755091:42816319:A:G	44187679	44187679	0	4.13e-10	1.82267	0.284421	-101	Promoter non-eGene eQTLs
ENSG00000101104	PABPC1L	chr20	44910063	44959035	rs6031847:43514203:C:T	44885562	44885562	0	3.66e-06	-0.449889	0.0958117	114	Promoter non-eGene eQTLs
ENSG00000166913	YWHAB	chr20	44885677	44908532	rs2072726:43538597:G:T	44909956	44909956	0	1.24e-11	-9.41681	1.34925	106	Promoter non-eGene eQTLs
ENSG00000124145	SDC4	chr20	45325289	45348424	rs2267868:43969840:C:T	45341200	45341200	0	2.25e-17	0.701434	0.078985	7224	Distal eGene eQTLs
ENSG00000124145	SDC4	chr20	45325289	45348424	rs2251358:43972682:G:C	45344042	45344042	1	2.72e-05	0.445388	0.104928	4382	Distal eGene eQTLs
ENSG00000275894	RP3-453C12.14	chr20	45345116	45345823	rs1997745	45470697	45470697	0	4.55e-05	0.177813	0.0431274	-991	Promoter non-eGene eQTLs
ENSG00000182931	WFDC10B	chr20	45684654	45705019	rs111467502:44387412:TTG:T	45758773	45758775	0	8.51e-67	-1.64724	0.0782561	33159	Distal non-eGene eQTLs
ENSG00000132801	ZSWIM3	chr20	45857618	45879122	rs760558:44485062:T:C	45856423	45856423	0	1.9e-05	-0.31872	0.0736285	1194	Promoter-eGene eQTLs
ENSG00000064601	CTSA	chr20	45890145	45898820	rs2868359	45856680	45856680	0	6.08e-14	3.60658	0.463385	726	Promoter non-eGene eQTLs
ENSG00000168612	ZSWIM1	chr20	45881228	45885266	rs11410450:44500503:G:GA	45871864	45871864	0	6.31e-06	-0.311428	0.0680466	-14247	Distal non-eGene eQTLs
ENSG00000204044	RP11-465L10.10	chr20	46013501	46022073	rs3918251:44638781:A:G	46010142	46010142	0	2.27e-07	-0.114629	0.0217649	-1234	Promoter non-eGene eQTLs
ENSG00000080189	SLC35C2	chr20	46345981	46364458	rs13040414:44982335:A:G	46353696	46353696	0	3.87e-06	-3.39416	0.724735	10762	Distal eGene eQTLs
ENSG00000149654	CDH22	chr20	46173734	46308498	rs41303819:45313634:C:A	46684995	46684995	0	4.88e-06	1.62283	0.350273	-528	Promoter non-eGene eQTLs
ENSG00000124212	PTGIS	chr20	49503875	49568146	rs116939356:48184560:G:T	49568023	49568023	0	7.62e-12	0.320222	0.0453885	123	Promoter-eGene eQTLs
ENSG00000197818	SLC9A8	chr20	49812714	49892242	exm1549133	49812948	49812948	0	4.24e-09	1.62362	0.270285	-235	Promoter-eGene eQTLs
ENSG00000101115	SALL4	chr20	51782332	51802520	rs6096585:50417672:G:A	51801133	51801133	0	5.39e-12	-0.348026	0.048955	1387	Promoter-eGene eQTLs
ENSG00000101146	RAE1	chr20	57351011	57379211	exm2254341	57183873	57183873	0	5.23e-06	-3.25114	0.704066	82756	Distal non-eGene eQTLs
ENSG00000283078	RP11-11M20.4	chr20	62066831	62068437	rs73152429:60605117:C:T	62030061	62030061	0	5.62e-07	0.824047	0.162017	35749	Distal non-eGene eQTLs
ENSG00000101188	NTSR1	chr20	62708838	62762771	rs4809551	62707549	62707549	0	2.1e-08	0.43812	0.0766138	1288	Promoter-eGene eQTLs
ENSG00000101190	TCFL5	chr20	62841116	62861763	rs3761301:61494021:C:T	62862669	62862669	0	1.53e-18	-1.30563	0.141397	-906	Promoter-eGene eQTLs
ENSG00000101191	DIDO1	chr20	62877739	62937952	rs62200157:61553461:T:C	62922109	62922109	0	1.28e-11	-4.02134	0.576674	15843	Distal eGene eQTLs
ENSG00000273759	RP4-563E14.1	chr20	62928622	62929297	rs3746759:61560004:T:G	62928652	62928652	0	2.48e-08	-0.467617	0.0822148	645	Promoter-eGene eQTLs
ENSG00000273759	RP4-563E14.1	chr20	62928622	62929297	20:61560706:G:A	62929354	62929354	1	2.79e-05	-0.700424	0.165238	-57	Promoter-eGene eQTLs
ENSG00000231133	HAR1B	chr20	63095494	63102319	rs74177992:61733718:T:C	63102366	63102366	0	1.38e-18	-0.312221	0.0337617	-47	Promoter-eGene eQTLs
ENSG00000275620	FLJ16779	chr20	63253979	63261615	rs6010885:61885238:T:C	63253886	63253886	0	4.06e-22	-0.664453	0.0647071	92	Promoter-eGene eQTLs
ENSG00000203900	RP11-261N11.8	chr20	63359989	63371177	rs45624232:61977335:A:G	63345983	63345983	0	4.92e-12	0.372967	0.0523597	32418	Distal non-eGene eQTLs
ENSG00000229299	RP4-583P15.10	chr20	63744690	63745958	rs150556970:62577502:G:A	63946149	63946149	1	6.92e-06	-1.50141	0.329532	-3423	Distal non-eGene eQTLs
ENSG00000198276	UCKL1	chr20	63939830	63956415	rs817310:62580642:C:G	63949289	63949289	0	7.17e-06	2.92602	0.643302	7126	Distal eGene eQTLs
ENSG00000243440	AF165138.7	chr21	14591931	14658821	rs459526:15964278:C:T	14591957	14591957	0	5.73e-13	1.2859	0.172573	66864	Distal eGene eQTLs
ENSG00000156256	USP16	chr21	29024630	29054488	rs2832222:30527777:T:C	29155456	29155456	0	9.78e-07	3.17028	0.63747	-77985	Distal non-eGene eQTLs
ENSG00000159082	SYNJ1	chr21	32628760	32728048	rs76549663:34099768:G:A	32727457	32727457	0	2.64e-40	1.35546	0.0909186	591	Promoter-eGene eQTLs
ENSG00000142166	IFNAR1	chr21	33324478	33359862	rs11355531:34699107:AC:A	33326802	33326803	0	3.91e-19	-0.640372	0.0680509	-2325	Promoter-eGene eQTLs
ENSG00000159128	IFNGR2	chr21	33402897	33479348	rs17882748:34775721:T:C	33403415	33403415	1	1.05e-05	0.311991	0.069907	-519	Promoter-eGene eQTLs
ENSG00000142188	TMEM50B	chr21	33432486	33480011	rs2834247:35056729:G:A	33684424	33684424	2	1.32e-05	-0.332285	0.0753271	-42024	Distal non-eGene eQTLs
ENSG00000159200	RCAN1	chr21	34513143	34615142	rs77382564:35898613:G:A	34526315	34526315	0	6.7e-10	2.23801	0.353741	88827	Distal eGene eQTLs
ENSG00000224790	AP000704.5	chr21	36966493	36975164	rs28690635:38338329:G:T	36966029	36966029	0	3.44e-35	-0.801514	0.0586326	463	Promoter-eGene eQTLs
ENSG00000159267	HLCS	chr21	36750889	36990236	rs9980304:38338969:T:C	36966669	36966669	0	1.51e-23	-0.679716	0.0637319	23567	Distal eGene eQTLs
ENSG00000182670	TTC3	chr21	37073227	37203112	rs1155786:38448025:A:G	37075725	37075725	0	1.67e-132	78.4327	2.1019	-2499	Promoter-eGene eQTLs
ENSG00000157540	DYRK1A	chr21	37365791	37517450	rs13052173:38784359:A:C	37412057	37412057	0	4.51e-05	-4.89483	1.18656	-46267	Distal eGene eQTLs
ENSG00000185437	SH3BGR	chr21	39445856	39515506	rs2837022:40796751:T:C	39424825	39424825	0	1.21e-27	1.21414	0.103225	-44581	Distal non-eGene eQTLs
ENSG00000157578	LCA5L	chr21	39405845	39445805	rs73367987:40817100:T:C	39445174	39445174	0	7.96e-14	0.768432	0.0992333	631	Promoter-eGene eQTLs
ENSG00000183778	B3GALT5	chr21	39556443	39673137	rs555963	39576619	39576619	0	7.88e-36	0.927141	0.0670536	-20177	Distal eGene eQTLs
ENSG00000183421	RIPK4	chr21	41739370	41767106	rs7280904:43186860:A:C	41766700	41766700	0	3.05e-06	-0.299853	0.063337	406	Promoter-eGene eQTLs
ENSG00000157617	C2CD2	chr21	41885113	41953890	rs13052308:43347556:C:T	41927447	41927447	0	7.77e-07	-4.00336	0.797413	26443	Distal eGene eQTLs
ENSG00000160188	RSPH1	chr21	42472487	42496354	rs2839538:43915541:T:C	42495431	42495431	2	2.98e-05	0.31	0.0733935	923	Promoter-eGene eQTLs
ENSG00000160191	PDE9A	chr21	42653637	42775509	rs13050727:44076869:C:T	42656759	42656759	1	1.29e-08	0.716248	0.123326	-3123	Distal eGene eQTLs
ENSG00000160199	PKNOX1	chr21	42974511	43033931	rs1788470:44401496:T:G	42981386	42981386	0	1.85e-06	-0.541895	0.111935	-6876	Distal eGene eQTLs
ENSG00000160216	AGPAT3	chr21	43865187	43986536	rs71322544:45359824:G:C	43939943	43939943	0	1.03e-07	-10.3477	1.90919	-74757	Distal eGene eQTLs
ENSG00000241728	AP001062.8	chr21	44328945	44330221	rs55638426:46217573:T:TGAGTCAAG	44797658	44797658	1	2.84e-05	-0.439503	0.10378	4361	Distal non-eGene eQTLs
ENSG00000183250	LINC01547	chr21	44932815	44939913	rs114578152:46351993:T:C	44932078	44932078	0	2.35e-05	-0.169289	0.0395586	7835	Distal eGene eQTLs
ENSG00000197381	ADARB1	chr21	45073854	45226560	rs9978714:46395443:C:T	44975528	44975528	0	2.04e-06	0.619082	0.128445	-35518	Distal non-eGene eQTLs
ENSG00000235374	SSR4P1	chr21	45070953	45074165	rs35515701:46532310:A:G	45112395	45112395	1	8.04e-06	-0.660522	0.146033	-38542	Distal non-eGene eQTLs
ENSG00000235374	SSR4P1	chr21	45070953	45074165	rs2838825:46655651:C:T	45235736	45235736	0	1.48e-10	-0.471272	0.0716328	-1396	Promoter non-eGene eQTLs
ENSG00000215447	BX322557.10	chr21	45288053	45291738	rs12626188:46669258:A:G	45249343	45249343	0	3.97e-40	-1.31695	0.0885881	-15003	Distal non-eGene eQTLs
ENSG00000223768	LINC00205	chr21	45293286	45297354	rs1056100:46678711:A:C	45258796	45258796	0	1.84e-28	-1.07849	0.0900624	-24456	Distal non-eGene eQTLs
ENSG00000276529	AP001505.10	chr21	44978833	44979274	rs73371038:46714857:C:T	45294942	45294942	0	2.81e-05	0.625335	0.147585	-1657	Promoter non-eGene eQTLs
ENSG00000142173	COL6A2	chr21	46098098	46132849	rs11700478:47517512:G:A	46097598	46097598	0	1.49e-07	0.67528	0.12624	499	Promoter-eGene eQTLs
ENSG00000183307	CECR6	chr22	17116300	17121367	rs62237785:17602164:C:G	17121274	17121274	0	8.77e-13	-0.539176	0.0729866	93	Promoter-eGene eQTLs
ENSG00000093072	CECR1	chr22	17178791	17221989	rs17807317	17199629	17199629	0	1.36e-130	16.2928	0.442855	22360	Distal eGene eQTLs
ENSG00000099954	CECR2	chr22	17359950	17558149	rs5992672:17850784:T:A	17370843	17370843	0	1.09e-07	-6.16461	1.13951	-10894	Distal eGene eQTLs
ENSG00000099968	BCL2L13	chr22	17628856	17730855	rs725769:18210560:T:G	17727794	17727794	0	1.5e-17	-15.9022	1.77979	-98939	Distal eGene eQTLs
ENSG00000283406	DGCR5	chr22	18970526	19031242	rs1210641:18984848:A:G	18997335	18997335	1	2.41e-07	0.382314	0.0727484	-26810	Distal eGene eQTLs
ENSG00000242259	C22orf39	chr22	19351369	19448232	rs712963:19156543:A:G	19169030	19169030	0	3.25e-05	1.20901	0.287641	2365	Promoter non-eGene eQTLs
ENSG00000070371	CLTCL1	chr22	19179474	19291716	rs3761407	19292118	19292118	3	2.95e-05	0.428965	0.10152	-402	Promoter-eGene eQTLs
ENSG00000185065	AC000068.5	chr22	19447894	19450105	rs149217901:19435962:CAG:C	19448439	19448441	0	3.23e-24	-0.663653	0.0611735	-546	Promoter-eGene eQTLs
ENSG00000099899	TRMT2A	chr22	20111867	20117392	Neandertal_chr22_20125200	20137677	20137677	0	5.72e-10	1.37799	0.21689	4256	Distal non-eGene eQTLs
ENSG00000273343	XXbac-B444P24.13	chr22	20318120	20318749	rs2280116:20306716:A:T	20319193	20319193	0	9.38e-13	-0.185585	0.0251566	-444	Promoter-eGene eQTLs
ENSG00000099942	CRKL	chr22	20917427	20953749	rs4820671:21275150:A:C	20920862	20920862	0	4.47e-06	-2.568	0.552024	-3436	Distal eGene eQTLs
ENSG00000183773	AIFM3	chr22	20965109	20981360	rs105034:21334924:G:C	20980635	20980635	0	1.27e-06	-0.582766	0.118484	-15527	Distal eGene eQTLs
ENSG00000161149	TUBA3FP	chr22	21002896	21014292	rs2075269:21356029:T:C	21001740	21001740	0	5.84e-07	0.305658	0.0601872	12552	Distal eGene eQTLs
ENSG00000100030	MAPK1	chr22	21754501	21867680	rs147676582:22217558:C:CT	21863268	21863268	0	1.83e-07	2.70418	0.509396	4412	Distal eGene eQTLs
ENSG00000100034	PPM1F	chr22	21919421	21952837	rs240066:22292995:C:A	21938623	21938623	0	1.2e-11	-0.674705	0.0966009	14214	Distal eGene eQTLs
ENSG00000100218	RSPH14	chr22	23059416	23145021	rs2301554:23484254:A:C	23142067	23142067	0	7.23e-29	-0.266175	0.0220341	2954	Distal eGene eQTLs
ENSG00000167037	SGSM1	chr22	24806170	24927578	rs9608339:25202807:A:G	24806840	24806840	0	4.74e-07	-0.89604	0.174997	-671	Promoter-eGene eQTLs
ENSG00000100099	HPS4	chr22	26443424	26483837	rs2283825:26924535:C:T	26528569	26528569	0	2.35e-23	-0.861054	0.0811357	68148	Distal non-eGene eQTLs
ENSG00000261188	CTA-445C9.14	chr22	26512538	26514568	rs1011312:26927221:T:C	26531255	26531255	1	6.24e-07	-0.648863	0.128106	65462	Distal non-eGene eQTLs
ENSG00000235954	TTC28-AS1	chr22	27919377	28008581	rs2267128:28316173:G:A	27920185	27920185	0	1.9e-14	2.73092	0.343448	-809	Promoter-eGene eQTLs
ENSG00000100276	RASL10A	chr22	29312934	29319679	rs6006090:29705927:A:G	29309937	29309937	0	8.06e-13	0.505369	0.0682923	9742	Distal eGene eQTLs
ENSG00000184117	NIPSNAP1	chr22	29554809	29581337	rs467812	29544960	29544960	0	3.09e-42	-5.25288	0.341803	10256	Distal non-eGene eQTLs
ENSG00000099992	TBC1D10A	chr22	30291991	30327046	rs9606716:30728453:G:A	30332464	30332464	0	1.48e-05	5.56699	1.2692	24483	Distal non-eGene eQTLs
ENSG00000100012	SEC14L3	chr22	30447960	30472049	rs5749123:30937512:G:A	30541525	30541525	1	3.15e-05	-0.352058	0.0836142	1011	Promoter non-eGene eQTLs
ENSG00000167065	DUSP18	chr22	30652052	30667890	rs11912792:31063832:G:A	30667845	30667845	0	9.38e-17	1.16953	0.134592	45	Promoter-eGene eQTLs
ENSG00000250318	CTA-963H5.5	chr22	30653878	30654814	rs11912792:31063832:G:A	30667845	30667845	0	2.49e-06	0.17808	0.0372714	45	Promoter non-eGene eQTLs
ENSG00000237977	EIF4HP2	chr22	30902220	30902781	rs55694472:31279889:C:T	30883902	30883902	0	5.02e-07	1.01494	0.198653	-190120	Distal non-eGene eQTLs
ENSG00000205853	RFPL3S	chr22	32359907	32382052	rs150165508:32806442:T:TAAGG	32410455	32410455	0	6.73e-25	-1.35976	0.123242	1800	Promoter non-eGene eQTLs
ENSG00000198792	TMEM184B	chr22	38219292	38273034	rs9610927:38653689:T:C	38257683	38257683	0	1.44e-07	-2.32737	0.434578	15351	Distal eGene eQTLs
ENSG00000100401	RANGAP1	chr22	41245612	41286251	rs11704524:41683144:G:C	41287140	41287140	0	8.29e-16	-4.83163	0.575755	-889	Promoter-eGene eQTLs
ENSG00000100403	ZC3H7B	chr22	41301523	41360147	rs67630029:41683387:T:TG	41287383	41287383	0	1.54e-10	-3.45025	0.524967	-1132	Promoter non-eGene eQTLs
ENSG00000100412	ACO2	chr22	41469126	41528989	rs117369326:41865334:G:A	41469330	41469330	1	5.81e-06	-0.778343	0.16939	-205	Promoter-eGene eQTLs
ENSG00000100410	PHF5A	chr22	41459718	41468725	rs79013:41889363:A:T	41493359	41493359	0	4.61e-05	0.555602	0.134858	-24234	Distal non-eGene eQTLs
ENSG00000100417	PMM1	chr22	41576895	41589890	rs76198486:42139665:G:A	41743661	41743661	0	5.22e-06	1.68156	0.364109	-44162	Distal non-eGene eQTLs
ENSG00000159958	TNFRSF13C	chr22	41922024	41926818	rs3752592:42342765:G:T	41946761	41946761	0	9.89e-17	0.327783	0.0377529	403	Promoter non-eGene eQTLs
ENSG00000100197	CYP2D6	chr22	42126500	42130906	rs133376:42466905:C:T	42070901	42070901	0	1.73e-49	-1.54368	0.0904465	-59	Promoter non-eGene eQTLs
ENSG00000100243	CYB5R3	chr22	42617841	42649568	rs13433651:42949187:C:A	42553181	42553181	0	4.58e-06	-3.06383	0.659375	436	Promoter non-eGene eQTLs
ENSG00000182841	RRP7BP	chr22	42555224	42582038	rs137081:42978587:TAGCTG:T	42582581	42582586	0	1.86e-11	-2.51369	0.363515	-543	Promoter-eGene eQTLs
ENSG00000128274	A4GALT	chr22	42692122	42721298	rs5759015	42895523	42895523	0	3.67e-10	-0.450375	0.0700637	119622	Distal non-eGene eQTLs
ENSG00000100304	TTLL12	chr22	43166623	43187133	rs73163910:43577708:C:G	43181702	43181702	0	1.66e-25	1.17578	0.105012	5431	Distal eGene eQTLs
ENSG00000280434	RP4-671O14.6	chr22	44139366	44153626	rs7285340:44419871:T:C	44023991	44023991	0	1.45e-06	-0.19769	0.0404128	-24780	Distal non-eGene eQTLs
ENSG00000188677	PARVB	chr22	43999212	44172949	rs35928604:44420015:G:C	44024135	44024135	1	2.54e-05	0.339075	0.0795783	-24924	Distal eGene eQTLs
ENSG00000138944	KIAA1644	chr22	44243668	44312851	rs7511306	44304707	44304707	0	2.44e-29	-0.944843	0.0774339	8144	Distal eGene eQTLs
ENSG00000226328	NUP50-AS1	chr22	45133021	45163781	rs9615053:45573406:C:A	45177525	45177525	0	3.73e-17	0.955004	0.108357	-13684	Distal non-eGene eQTLs
ENSG00000128408	RIBC2	chr22	45413692	45432496	rs2272804:45809624:C:A	45413743	45413743	0	1.3e-34	-0.311878	0.0230544	-52	Promoter-eGene eQTLs
ENSG00000231711	LINC00899	chr22	46039908	46044853	rs1135856:46440605:T:C	46044725	46044725	0	2.18e-13	0.311278	0.0409804	128	Promoter-eGene eQTLs
ENSG00000186951	PPARA	chr22	46150522	46243756	rs135549	46157413	46157413	0	1.74e-58	0.960219	0.0501618	-6892	Distal eGene eQTLs
ENSG00000205643	CDPF1	chr22	46244012	46250679	rs135549	46157413	46157413	0	4.98e-06	-0.228159	0.0492928	-6892	Distal non-eGene eQTLs
ENSG00000280384	RP4-695O20.1	chr22	46163304	46165347	rs135539:46559267:C:A	46163368	46163368	0	4.16e-09	0.159212	0.0264884	-65	Promoter-eGene eQTLs
ENSG00000075234	TTC38	chr22	46267962	46294008	rs7285629:46692203:T:C	46296306	46296306	0	9.11e-08	1.39214	0.255736	354	Promoter non-eGene eQTLs
ENSG00000075240	GRAMD4	chr22	46576013	46679790	rs6008939	46642184	46642184	0	1.3e-05	0.765364	0.173375	-66172	Distal eGene eQTLs
ENSG00000219438	FAM19A5	chr22	48489461	48850912	rs77552406:49028615:A:G	48632803	48632803	0	2.31e-07	1.64658	0.312828	-143343	Distal eGene eQTLs
ENSG00000273253	RP3-402G11.26	chr22	50199091	50200837	rs5771096:50638502:T:C	50200073	50200073	0	5.17e-08	-0.254952	0.0459261	764	Promoter-eGene eQTLs
ENSG00000185386	MAPK11	chr22	50263714	50270767	rs4992603:50714749:C:T	50276320	50276320	0	2.07e-05	0.889451	0.206462	31307	Distal non-eGene eQTLs
ENSG00000025770	NCAPH2	chr22	50508217	50523472	rs131807:50963540:G:C	50525111	50525111	0	2.71e-05	0.308163	0.0725769	-1185	Promoter non-eGene eQTLs
ENSG00000100288	CHKB	chr22	50578950	50601455	rs86337:51020668:C:A	50582239	50582239	0	8.62e-09	1.22766	0.208765	19216	Distal eGene eQTLs
ENSG00000071282	LMCD1	chr3	8501708	8574673	rs9861544:8544420:T:C	8502734	8502734	0	2.09e-08	-4.54967	0.79544	-1027	Promoter-eGene eQTLs
ENSG00000134077	THUMPD3	chr3	9362843	9386791	rs2600188:9405704:T:C	9364020	9364020	0	1.84e-11	-1.94761	0.281589	-1178	Promoter-eGene eQTLs
ENSG00000206573	THUMPD3-AS1	chr3	9349690	9398579	rs2596913:9436472:T:C	9394788	9394788	0	1.11e-08	0.41705	0.0714816	3791	Distal eGene eQTLs
ENSG00000163702	IL17RC	chr3	9917075	9933630	exm288871	9914595	9914595	0	1.48e-08	0.350382	0.0605949	2479	Promoter-eGene eQTLs
ENSG00000255021	RP11-536I6.2	chr3	14272374	14303845	rs11711684	14281424	14281424	1	8.58e-08	-0.526867	0.0965813	22421	Distal eGene eQTLs
ENSG00000255021	RP11-536I6.2	chr3	14272374	14303845	rs9869724:14330905:A:G	14289405	14289405	0	6.81e-50	0.906773	0.0528378	14440	Distal eGene eQTLs
ENSG00000225733	FGD5-AS1	chr3	14920348	14948424	3:14485310:C:G	14443802	14443802	1	3.7e-05	0.625906	0.150009	-41226	Distal non-eGene eQTLs
ENSG00000225733	FGD5-AS1	chr3	14920348	14948424	rs113963087:14987675:C:CAAGT	14946168	14946168	0	4.28e-22	-0.7753	0.0755484	2256	Promoter-eGene eQTLs
ENSG00000131381	RBSN	chr3	15070074	15099163	rs62240402:15111397:C:T	15069890	15069890	0	1.7e-05	-1.47571	0.338967	29273	Distal eGene eQTLs
ENSG00000224660	SH3BP5-AS1	chr3	15254185	15264493	rs11713836:15294811:G:A	15253304	15253304	0	1.72e-24	24.2584	2.22078	880	Promoter-eGene eQTLs
ENSG00000131370	SH3BP5	chr3	15254854	15341368	rs28450659:15374050:C:T	15332543	15332543	1	3.15e-11	-0.637219	0.0932887	8825	Distal eGene eQTLs
ENSG00000131386	GALNT15	chr3	16174650	16231992	rs12634621:16215739:C:T	16174232	16174232	0	1.44e-05	-2.24566	0.511345	417	Promoter-eGene eQTLs
ENSG00000182568	SATB1	chr3	18345388	18445588	rs199730219:18467316:G:GGGGCAGGAC	18425824	18425824	0	8.28e-07	5.11144	1.02078	19764	Distal eGene eQTLs
ENSG00000163576	EFHB	chr3	19879473	19947025	rs11128927:19988437:G:C	19946945	19946945	0	8.71e-60	1.00365	0.0516262	80	Promoter-eGene eQTLs
ENSG00000173705	SUSD5	chr3	33150043	33219215	rs6764459:33260422:C:T	33218930	33218930	0	5.35e-16	0.270901	0.0320505	285	Promoter-eGene eQTLs
ENSG00000198590	C3orf35	chr3	37386270	37435497	rs7610896:37494423:A:G	37452932	37452932	0	1.09e-07	-0.941227	0.173978	-817	Promoter non-eGene eQTLs
ENSG00000144659	SLC25A38	chr3	39383349	39397351	rs13096318:39425757:C:T	39384266	39384266	1	7.18e-08	-0.380837	0.0693804	-918	Promoter-eGene eQTLs
ENSG00000223797	ENTPD3-AS1	chr3	40313803	40453329	rs2085115:40497540:G:T	40456049	40456049	0	7.27e-17	0.564372	0.0646925	1243	Promoter non-eGene eQTLs
ENSG00000182606	TRAK1	chr3	42013803	42225889	rs6775014:42207505:T:G	42166013	42166013	0	9.38e-10	11.8794	1.8948	-152211	Distal eGene eQTLs
ENSG00000093183	SEC22C	chr3	42547970	42601080	rs639692:42643425:G:A	42601933	42601933	0	2.81e-14	-2.28604	0.289562	-853	Promoter-eGene eQTLs
ENSG00000144648	ACKR2	chr3	42804753	42887974	rs58045017:42844150:T:C	42802658	42802658	0	5.36e-11	-0.510332	0.0756591	2094	Promoter-eGene eQTLs
ENSG00000160796	NBEAL2	chr3	46979684	47009703	rs62246443:47172407:T:C	47130917	47130917	0	1.95e-08	-0.540884	0.0943511	33050	Distal non-eGene eQTLs
ENSG00000164045	CDC25A	chr3	48157147	48188402	exm310747	48268338	48268338	0	3.06e-49	0.977355	0.0574581	-27238	Distal non-eGene eQTLs
ENSG00000178149	DALRD3	chr3	49015489	49022293	rs730566	48445644	48445644	0	2.74e-05	-0.704237	0.165983	1012	Promoter non-eGene eQTLs
ENSG00000173402	DAG1	chr3	49468704	49535618	rs73078357:48695834:T:C	48658401	48658401	0	8.65e-07	2.29349	0.458832	4514	Distal non-eGene eQTLs
ENSG00000283189	RP11-949J7.8	chr3	49416778	49429314	rs71077801:49415044:G:GA	49377611	49377611	0	5.36e-05	1.23206	0.301735	35387	Distal non-eGene eQTLs
ENSG00000177479	ARIH2	chr3	48918822	48986382	3:49809674:A:G	49772241	49772241	1	0.000161567	-1.04329	0.273921	14301	Distal non-eGene eQTLs
ENSG00000004534	RBM6	chr3	49940008	50100045	rs2071206:50160109:G:A	50122676	50122676	0	6.17e-55	28.6256	1.562	33409	Distal non-eGene eQTLs
ENSG00000164076	CAMKV	chr3	49857989	49870222	rs35451690:50168854:A:ACG	50131421	50131421	0	7.97e-27	1.31715	0.114066	24664	Distal non-eGene eQTLs
ENSG00000114378	HYAL1	chr3	50299890	50312381	rs138555089:50341185:C:A	50303754	50303754	0	4.59e-10	-1.72305	0.269625	8627	Distal eGene eQTLs
ENSG00000088538	DOCK3	chr3	50675242	51384198	rs60184902:50996257:C:T	50958826	50958826	0	7.54e-05	5.40809	1.35204	-283585	Distal eGene eQTLs
ENSG00000090097	PCBP4	chr3	51957455	51974016	rs323877:51999463:G:C	51965447	51965447	0	4.38e-12	-51.2908	7.18234	8569	Distal eGene eQTLs
ENSG00000114841	DNAH1	chr3	52316320	52400491	rs79175419:52491707:G:A	52457691	52457691	1	6.24e-09	-1.01061	0.170179	-2573	Distal non-eGene eQTLs
ENSG00000280422	RP11-155D18.13	chr3	51951850	51953902	rs192855409:52567794:A:C	52533778	52533778	1	6.82e-05	-0.451561	0.112197	235	Promoter non-eGene eQTLs
ENSG00000016864	GLT8D1	chr3	52694486	52706083	rs34218707:52700906:CA:C	52666890	52666891	0	5.8e-05	0.964533	0.237315	19027	Distal non-eGene eQTLs
ENSG00000113812	ACTR8	chr3	53867067	53882202	rs2304576	53888230	53888230	0	1.16e-50	-2.37513	0.136979	3758	Distal non-eGene eQTLs
ENSG00000168309	FAM107A	chr3	58564118	58627610	rs3792402:58560446:C:T	58574719	58574719	0	4.38e-05	-8.56371	2.07262	52891	Distal eGene eQTLs
ENSG00000163378	EOGT	chr3	68975215	69013961	rs9310134:69035926:C:T	68986775	68986775	0	3.86e-20	1.77633	0.18304	27186	Distal eGene eQTLs
ENSG00000114541	FRMD4B	chr3	69169991	69542583	rs57898618:69404178:GA:G	69355027	69355028	0	7.2e-07	4.01361	0.796986	187556	Distal eGene eQTLs
ENSG00000255423	EBLN2	chr3	73061660	73063337	rs9873229:73046561:C:T	72997410	72997410	0	1.21e-07	0.229861	0.0426501	-625	Promoter non-eGene eQTLs
ENSG00000183185	GABRR3	chr3	97986674	98035304	rs35867090:97748958:GA:G	98030114	98030115	1	6.68e-08	0.40855	0.0742444	5190	Distal eGene eQTLs
ENSG00000057019	DCBLD2	chr3	98795942	98901689	rs13091170:98620300:G:A	98901456	98901456	1	2.31e-06	-0.653862	0.136391	233	Promoter-eGene eQTLs
ENSG00000273374	RP11-383I23.2	chr3	99802700	99806058	rs34514832:99535436:GT:G	99816592	99816593	0	1.22e-06	-0.206999	0.0420096	1242	Promoter non-eGene eQTLs
ENSG00000114021	NIT2	chr3	100334702	100361635	rs277627:100055273:G:A	100336429	100336429	0	3.57e-11	-2.08576	0.306259	-1728	Promoter-eGene eQTLs
ENSG00000081154	PCNP	chr3	101574096	101594437	rs3762732:101291984:A:C	101573140	101573140	0	6.5e-05	-3.72262	0.92227	955	Promoter-eGene eQTLs
ENSG00000066422	ZBTB11	chr3	101648890	101677495	rs73159237:101406831:C:T	101687987	101687987	0	4.76e-05	1.12728	0.274156	-1205	Promoter non-eGene eQTLs
ENSG00000144821	MYH15	chr3	108380370	108529322	rs7612356:107811037:C:G	108092190	108092190	1	1.71e-06	0.3803	0.0783056	-1165	Promoter non-eGene eQTLs
ENSG00000114446	IFT57	chr3	108160813	108222570	rs7639774:107816216:T:G	108097369	108097369	0	4.56e-23	3.67543	0.348934	-6344	Distal non-eGene eQTLs
ENSG00000196776	CD47	chr3	108043299	108091025	rs17231503	108098452	108098452	0	1.99e-68	-1.18624	0.0553693	-7427	Distal eGene eQTLs
ENSG00000279277	RP11-861A13.3	chr3	108036719	108038445	rs17231503	108098452	108098452	0	4.27e-35	-0.914413	0.0670056	-7427	Distal non-eGene eQTLs
ENSG00000144821	MYH15	chr3	108380370	108529322	rs936266:108125614:C:T	108406767	108406767	0	4.09e-15	-0.619601	0.0758437	122555	Distal eGene eQTLs
ENSG00000138472	GUCA1C	chr3	108907793	108953895	rs751298:108656151:T:C	108937304	108937304	1	1.63e-06	-0.363696	0.074718	16591	Distal eGene eQTLs
ENSG00000144824	PHLDB2	chr3	111732498	111976517	rs4682298	111728212	111728212	0	1.41e-35	-0.588907	0.0427823	-53536	Distal non-eGene eQTLs
ENSG00000091986	CCDC80	chr3	112596795	112649530	rs6794305:112355977:C:T	112637130	112637130	0	7.55e-08	-1.9662	0.358822	12400	Distal eGene eQTLs
ENSG00000163608	NEPRO	chr3	113002441	113019861	rs2293560:112738318:C:T	113019471	113019471	0	7.63e-11	0.568714	0.0850375	390	Promoter-eGene eQTLs
ENSG00000272758	RP11-299J3.8	chr3	122416208	122443180	rs57086078:122104982:T:C	122386135	122386135	0	1.32e-19	1.21599	0.127346	-1959	Promoter non-eGene eQTLs
ENSG00000196981	WDR5B	chr3	122412333	122416051	rs9289193:122134889:T:A	122416042	122416042	0	3.31e-51	0.927038	0.0530778	9	Promoter-eGene eQTLs
ENSG00000272758	RP11-299J3.8	chr3	122416208	122443180	rs190522327:122296802:C:A	122577955	122577955	2	1.92e-05	-0.728161	0.16832	-353	Promoter non-eGene eQTLs
ENSG00000173175	ADCY5	chr3	123282297	123449758	exm-rs11708067	123346931	123346931	0	9.56e-16	2.3368	0.279115	102827	Distal eGene eQTLs
ENSG00000160145	KALRN	chr3	124080024	124726325	rs75589696:124213378:T:G	124494531	124494531	1	4.68e-06	-1.1236	0.242052	-414508	Distal eGene eQTLs
ENSG00000114491	UMPS	chr3	124730367	124749273	rs2055983:124480430:A:G	124761583	124761583	0	1.15e-14	0.711926	0.0887437	139835	Distal non-eGene eQTLs
ENSG00000082781	ITGB5	chr3	124761949	124901418	rs3836307:124489739:CG:C	124770892	124770893	0	8.42e-06	-2.12164	0.470129	130526	Distal eGene eQTLs
ENSG00000173706	HEG1	chr3	124965711	125055958	rs2877839	125058001	125058001	0	3.23e-13	-20.3967	2.70612	-2043	Promoter-eGene eQTLs
ENSG00000187715	KBTBD12	chr3	127915233	127987671	rs1469656:127678804:C:T	127959961	127959961	1	3.99e-13	0.495231	0.065982	-44729	Distal eGene eQTLs
ENSG00000231305	RP11-723O4.2	chr3	128861314	128871540	rs1825640:128643317:C:T	128924474	128924474	0	4.59e-08	0.159115	0.0285485	46856	Distal non-eGene eQTLs
ENSG00000251474	RPL32P3	chr3	129382923	129399655	rs2285353	129492024	129492024	1	6.3e-07	0.858061	0.169471	-51988	Distal non-eGene eQTLs
ENSG00000163913	IFT122	chr3	129440037	129520507	rs2260840:129234259:T:C	129515416	129515416	0	7.75e-18	-2.74493	0.304248	-75380	Distal eGene eQTLs
ENSG00000261758	RP11-102M11.2	chr3	136752631	136755780	rs6791142	136658535	136658535	0	5.48e-41	-0.85768	0.0569086	93868	Distal non-eGene eQTLs
ENSG00000181322	NME9	chr3	138261438	138329886	rs13087441:138042669:G:A	138323827	138323827	0	1.81e-06	-0.321929	0.0664383	6059	Distal eGene eQTLs
ENSG00000184432	COPB2	chr3	139355601	139389732	rs35109875:139107468:GT:G	139388626	139388627	0	5.21e-14	3.76891	0.482846	1106	Promoter-eGene eQTLs
ENSG00000250543	RP11-442N1.1	chr3	139688404	139689342	rs9845929	139686016	139686016	0	1.34e-06	-2.37112	0.483168	3326	Distal eGene eQTLs
ENSG00000163864	NMNAT3	chr3	139560181	139678017	rs10935342:139405342:T:C	139686500	139686500	0	6.46e-07	-0.400173	0.0791148	-8483	Distal eGene eQTLs
ENSG00000163864	NMNAT3	chr3	139560181	139678017	rs55931700:139410394:T:TC	139691552	139691552	1	1.03e-05	0.381592	0.0854076	-13535	Distal eGene eQTLs
ENSG00000177311	ZBTB38	chr3	141324214	141449792	rs2871960	141402972	141402972	0	1.23e-14	6.59278	0.822729	-78759	Distal eGene eQTLs
ENSG00000241570	PAQR9-AS1	chr3	142960651	143001559	rs251488:142701110:A:T	142982268	142982268	0	1.14e-27	-3.39235	0.288247	-21618	Distal eGene eQTLs
ENSG00000188582	PAQR9	chr3	142949165	142963682	rs251488:142701110:A:T	142982268	142982268	0	4.04e-18	-0.956196	0.104989	-21618	Distal non-eGene eQTLs
ENSG00000240032	RP11-274H2.3	chr3	146066345	146069185	rs6793380:145873068:G:A	146155281	146155281	0	4.92e-07	-0.20068	0.0392476	8372	Distal non-eGene eQTLs
ENSG00000114744	COMMD2	chr3	149738471	149752499	rs11354448:149469618:CT:C	149751831	149751832	0	2.87e-23	2.10548	0.198845	668	Promoter-eGene eQTLs
ENSG00000144895	EIF2A	chr3	150546679	150584242	rs17280260:150264779:G:A	150546992	150546992	1	3.34e-05	-0.61077	0.145553	-314	Promoter-eGene eQTLs
ENSG00000240875	LINC00886	chr3	156747347	156817062	rs74525360:156468913:G:A	156751124	156751124	1	2.59e-10	-1.19489	0.184206	65938	Distal eGene eQTLs
ENSG00000068885	IFT80	chr3	160256987	160399880	rs140553498:160082790:T:TA	160365002	160365002	0	1.75e-14	4.16612	0.52317	34878	Distal eGene eQTLs
ENSG00000163536	SERPINI1	chr3	167735244	167825568	rs59710391:167529472:TA:T	167811684	167811685	0	3.44e-09	5.36314	0.887331	-76441	Distal eGene eQTLs
ENSG00000171757	LRRC34	chr3	169793429	169812986	rs9878797	169812170	169812170	0	5.56e-40	-3.24351	0.2187	816	Promoter-eGene eQTLs
ENSG00000269984	RP11-362K14.5	chr3	169777193	169780334	rs9878797	169812170	169812170	0	7.14e-30	-0.61003	0.049441	816	Promoter non-eGene eQTLs
ENSG00000154310	TNIK	chr3	171061340	171460408	rs13060086:171177576:A:G	171459787	171459787	0	3.56e-06	-5.91246	1.25767	621	Promoter-eGene eQTLs
ENSG00000144959	NCEH1	chr3	172630250	172711218	rs13323236:172425597:T:C	172707807	172707807	0	9.92e-07	-3.1504	0.633835	3411	Distal eGene eQTLs
ENSG00000240429	LRRFIP1P1	chr3	179259029	179261273	rs113000836:178980404:A:G	179262616	179262616	0	6.36e-10	0.533075	0.0841413	-1343	Promoter-eGene eQTLs
ENSG00000161204	ABCF3	chr3	184186024	184194012	rs16833781:183903935:C:CG	184186147	184186147	1	5.57e-13	0.489262	0.0656237	-124	Promoter-eGene eQTLs
ENSG00000161203	AP2M1	chr3	184174690	184184091	rs56351888:183904226:C:T	184186438	184186438	0	9.01e-08	-7.15546	1.31395	-415	Promoter non-eGene eQTLs
ENSG00000163882	POLR2H	chr3	184361719	184368596	rs9845144:184056716:G:A	184338928	184338928	0	4.69e-05	-0.439166	0.106701	-3002	Distal non-eGene eQTLs
ENSG00000240024	LINC00888	chr3	183447609	183456013	rs202193300:184085280:C:CT	184367492	184367492	1	3.33e-05	-0.434549	0.103525	-5774	Distal non-eGene eQTLs
ENSG00000177383	MAGEF1	chr3	184710368	184712002	exm369679	184711115	184711115	0	1.33e-12	-1.48552	0.202829	887	Promoter-eGene eQTLs
ENSG00000090520	DNAJB11	chr3	186567404	186585800	rs12330875:186285986:C:T	186568197	186568197	0	6.93e-08	1.66928	0.303738	-794	Promoter-eGene eQTLs
ENSG00000213139	CRYGS	chr3	186538442	186546702	rs3733160:186288810:G:A	186571021	186571021	0	1.37e-06	-0.526787	0.107429	-478	Promoter non-eGene eQTLs
ENSG00000114279	FGF12	chr3	192139396	192767764	rs10937534	192155435	192155435	0	1.5e-09	2.24944	0.363452	612329	Distal eGene eQTLs
ENSG00000236229	VEZF1P1	chr3	193155457	193157208	3:192962257:G:GT	193244468	193244468	1	5.43e-07	-0.670646	0.131678	-3343	Distal non-eGene eQTLs
ENSG00000174007	CEP19	chr3	196706278	196712293	rs71323742:196439124:C:G	196712253	196712253	0	7.51e-18	-0.80085	0.0887265	40	Promoter-eGene eQTLs
ENSG00000242686	RP11-1191J2.2	chr4	652851	656213	rs28470912:665737:C:T	671948	671948	0	1.13e-26	-1.48024	0.128638	1632	Promoter non-eGene eQTLs
ENSG00000185619	PCGF3	chr4	705749	770640	rs72501956:700141:A:C	706352	706352	3	3.35e-05	0.72705	0.173282	-604	Promoter-eGene eQTLs
ENSG00000196810	CTBP1-AS2	chr4	1249301	1288291	rs3775094:1238859:G:A	1245071	1245071	0	8.36e-25	1.06686	0.0969175	4229	Distal eGene eQTLs
ENSG00000090316	MAEA	chr4	1289852	1340147	rs10012416:1324346:G:A	1330558	1330558	1	4.99e-05	-0.385333	0.0939685	-40707	Distal eGene eQTLs
ENSG00000159733	ZFYVE28	chr4	2269583	2418663	rs35861674:2358232:G:A	2356505	2356505	0	3.31e-06	-0.70482	0.149424	62158	Distal eGene eQTLs
ENSG00000063978	RNF4	chr4	2462221	2625320	rs35847184:2472554:CT:C	2470827	2470828	0	4.47e-11	1.3597	0.200708	-8607	Distal eGene eQTLs
ENSG00000168884	TNIP2	chr4	2741649	2756376	rs13135697:2474781:A:G	2473054	2473054	0	3.13e-05	-0.68347	0.162265	-10834	Distal non-eGene eQTLs
ENSG00000168826	ZBTB49	chr4	4290252	4321786	rs3775346:4290369:T:C	4288642	4288642	0	2.19e-11	-0.456844	0.066319	1609	Promoter-eGene eQTLs
ENSG00000168824	NSG1	chr4	4348141	4419058	rs11296481:4477198:CA:C	4475471	4475472	0	1.31e-05	-3.17061	0.718453	66875	Distal non-eGene eQTLs
ENSG00000251580	RP11-539L10.3	chr4	6670726	6673830	rs7662433:6676485:G:A	6674758	6674758	0	6.77e-28	-1.02938	0.0870284	-928	Promoter-eGene eQTLs
ENSG00000173011	TADA2B	chr4	7041900	7057952	rs9986037:7050610:G:A	7048883	7048883	0	6.95e-18	4.10725	0.454528	-6984	Distal eGene eQTLs
ENSG00000109519	GRPEL1	chr4	7058907	7068197	rs2358718:7068743:G:T	7067016	7067016	0	8.18e-43	-4.73817	0.305595	1181	Promoter-eGene eQTLs
ENSG00000087008	ACOX3	chr4	8366283	8440723	rs6852348:8396576:A:T	8394849	8394849	0	7.42e-16	1.37157	0.163145	45874	Distal eGene eQTLs
ENSG00000178163	ZNF518B	chr4	10439875	10457410	rs76917885:10458486:A:C	10456862	10456862	0	7.54e-07	2.83063	0.563129	548	Promoter-eGene eQTLs
ENSG00000169762	TAPT1	chr4	16160506	16227410	rs1356415:16057824:G:A	16056201	16056201	2	9.72e-06	0.68088	0.15196	28177	Distal non-eGene eQTLs
ENSG00000007062	PROM1	chr4	15963077	16084378	rs78824243:16080821:A:G	16079198	16079198	0	2.24e-06	52.9346	11.0271	5180	Distal eGene eQTLs
ENSG00000169762	TAPT1	chr4	16160506	16227410	rs12506478:16191362:G:A	16189739	16189739	0	3.44e-39	0.964489	0.0658746	37671	Distal eGene eQTLs
ENSG00000038210	PI4K2B	chr4	25233976	25279092	rs4697565:25313221:G:A	25311599	25311599	0	7.78e-32	1.08892	0.0848306	1186	Promoter non-eGene eQTLs
ENSG00000157765	SLC34A2	chr4	25655302	25678748	rs10027659:25657161:G:C	25655539	25655539	0	2.65e-09	0.641216	0.105289	-238	Promoter-eGene eQTLs
ENSG00000250317	SMIM20	chr4	25861831	25929874	rs6847307:25913582:G:A	25911960	25911960	0	4.03e-15	-0.577226	0.070639	-50130	Distal eGene eQTLs
ENSG00000091490	SEL1L3	chr4	25747428	25863760	rs936234:25919109:A:G	25917487	25917487	0	2.63e-16	-6.2238	0.72797	-55657	Distal non-eGene eQTLs
ENSG00000109814	UGDH	chr4	39498756	39528311	rs13127236:39528938:T:A	39527318	39527318	0	9.24e-86	3.97533	0.156161	993	Promoter-eGene eQTLs
ENSG00000124406	ATP8A1	chr4	42408374	42657105	rs1460357:42631449:C:G	42629432	42629432	0	1.92e-24	-0.676974	0.0620483	27673	Distal eGene eQTLs
ENSG00000124406	ATP8A1	chr4	42408374	42657105	rs4629487:42659139:G:A	42657122	42657122	1	4.25e-06	-0.340724	0.0730692	-17	Promoter-eGene eQTLs
ENSG00000183783	KCTD8	chr4	44173910	44448807	rs12502623:44434717:A:C	44432700	44432700	0	1.28e-58	-1.7717	0.0924053	16107	Distal eGene eQTLs
ENSG00000163281	GNPDA2	chr4	44682201	44726595	rs6852372:44651820:G:A	44649803	44649803	0	6.87e-06	0.835822	0.183377	28753	Distal non-eGene eQTLs
ENSG00000145246	ATP10D	chr4	47485289	47593486	rs11724087:47520502:C:T	47518485	47518485	0	3.21e-32	-0.771276	0.059636	-33197	Distal eGene eQTLs
ENSG00000163293	NIPAL1	chr4	47914143	48040173	rs76552755:48019626:C:T	48017609	48017609	0	1.64e-44	3.63793	0.228724	-103467	Distal eGene eQTLs
ENSG00000156194	PPEF2	chr4	75859865	75902571	rs35334463:76818050:T:C	75896897	75896897	1	2.93e-06	0.378418	0.0797834	5674	Distal eGene eQTLs
ENSG00000138760	SCARB2	chr4	76158738	76213893	rs12512579:77111032:C:T	76189879	76189879	0	6.13e-10	-22.9728	3.6225	24014	Distal eGene eQTLs
ENSG00000272677	RP11-127B20.3	chr4	82374302	82384027	rs113806092:83296110:GT:G	82374957	82374958	0	3.65e-05	-0.28638	0.0685883	-656	Promoter-eGene eQTLs
ENSG00000145284	SCD5	chr4	82629540	82798857	rs55825761:83541628:G:T	82620475	82620475	0	2.55e-10	-0.566103	0.0872358	962	Promoter non-eGene eQTLs
ENSG00000231782	LINC00575	chr4	82613114	82621437	rs7356293:83542657:G:A	82621504	82621504	0	7.5e-32	2.30134	0.179226	-67	Promoter-eGene eQTLs
ENSG00000261496	RP13-514E23.1	chr4	86012297	86013874	rs10516785:87892659:T:C	86971507	86971507	0	3.77e-05	-0.268729	0.0644739	-36505	Distal non-eGene eQTLs
ENSG00000163644	PPM1K	chr4	88257621	88284769	rs11723697:88186722:A:G	87265570	87265570	0	6.46e-06	2.53739	0.555063	1252	Promoter non-eGene eQTLs
ENSG00000118762	PKD2	chr4	88007669	88077777	rs28357094:88896797:T:G	87975645	87975645	0	9.45e-20	4.45483	0.464456	5	Promoter non-eGene eQTLs
ENSG00000248019	FAM13A-AS1	chr4	88709790	88730103	rs6857847	88593421	88593421	0	1.2e-12	-15.2926	2.0836	-72373	Distal non-eGene eQTLs
ENSG00000180346	TIGD2	chr4	89111501	89114899	rs17015027:90034686:A:G	89113535	89113535	0	4.35e-09	-1.73974	0.28983	-2035	Promoter-eGene eQTLs
ENSG00000271474	RP11-710C12.1	chr4	95549130	95552457	4:96446747:TAAA:T	95525596	95525599	0	1.4e-05	0.313429	0.0712652	23610	Distal non-eGene eQTLs
ENSG00000182168	UNC5C	chr4	95162505	95549206	rs1385668:96459330:A:G	95538179	95538179	0	4.43e-13	-0.500266	0.0667918	11027	Distal eGene eQTLs
ENSG00000260641	RP11-1299A16.3	chr4	98658905	98664550	rs28722480:99582072:G:A	98660921	98660921	0	7.4e-50	9.80364	0.571539	-2017	Promoter-eGene eQTLs
ENSG00000230069	LRRC37A15P	chr4	102727275	102730721	rs223490:103679117:G:T	102757960	102757960	0	1.47e-12	-0.180614	0.0247098	3034	Distal non-eGene eQTLs
ENSG00000164039	BDH2	chr4	103079436	103099883	rs6830624:104020422:T:C	103099265	103099265	0	2.66e-22	0.716595	0.0694363	618	Promoter-eGene eQTLs
ENSG00000138796	HADH	chr4	107989715	108035175	rs11316445:108912714:AC:A	107991558	107991559	0	1.39e-20	1.22683	0.124769	-1844	Promoter-eGene eQTLs
ENSG00000188517	COL25A1	chr4	108810722	109302657	rs10032342:110199163:T:C	109278007	109278007	0	1.07e-23	-1.06904	0.0998512	24650	Distal eGene eQTLs
ENSG00000174720	LARP7	chr4	112636965	112657592	rs75321673:113558874:A:G	112637718	112637718	0	1.27e-05	3.34675	0.757194	-754	Promoter-eGene eQTLs
ENSG00000145362	ANK2	chr4	112818110	113383740	rs4834317:114060534:C:G	113139378	113139378	0	1.29e-11	-44.7547	6.41838	-321269	Distal eGene eQTLs
ENSG00000164100	NDST3	chr4	118033619	118258648	rs618177:119146315:T:C	118225160	118225160	0	9.71e-12	0.885775	0.12623	-191542	Distal eGene eQTLs
ENSG00000173376	NDNF	chr4	121035614	121073021	rs2390072:121983830:C:T	121062675	121062675	0	6.98e-21	0.964542	0.0972454	10346	Distal eGene eQTLs
ENSG00000164056	SPRY1	chr4	123396796	123403760	rs3060462:124324242:CCTT:C	123403087	123403090	0	8.35e-06	-1.57248	0.348308	-6292	Distal eGene eQTLs
ENSG00000251432	RP11-420A23.1	chr4	128292752	128519394	rs72677887:129349033:G:C	128427878	128427878	0	9.34e-25	0.952914	0.0866682	-135127	Distal eGene eQTLs
ENSG00000250241	RP11-9G1.3	chr4	133075312	133149116	rs4263412:134046923:A:G	133125768	133125768	0	1.72e-08	-0.125686	0.0218392	23348	Distal eGene eQTLs
ENSG00000170153	RNF150	chr4	140859808	141212877	rs58005040:141941256:A:AT	141020102	141020102	1	3.38e-07	0.36689	0.0707155	192775	Distal eGene eQTLs
ENSG00000169989	TIGD4	chr4	152769355	152779764	rs28542394:153700734:G:C	152779582	152779582	0	7.86e-06	2.71737	0.600121	182	Promoter-eGene eQTLs
ENSG00000052795	FNIP2	chr4	158769139	158908049	rs74931360:159709931:C:T	158788779	158788779	1	5.99e-10	-0.852089	0.134276	-19641	Distal eGene eQTLs
ENSG00000273449	RP11-218F10.3	chr4	163529772	163530697	rs2276979:164415734:A:G	163494582	163494582	0	4.04e-32	-0.261341	0.0202464	-140	Promoter non-eGene eQTLs
ENSG00000250486	FAM218A	chr4	164956949	164959122	rs3733419:165878170:A:G	164957018	164957018	0	3.21e-15	-0.710598	0.0866218	-70	Promoter-eGene eQTLs
ENSG00000154447	SH3RF1	chr4	169094257	169271105	rs10012902:169397830:C:T	168476679	168476679	0	6.05e-06	-0.768734	0.167626	61107	Distal non-eGene eQTLs
ENSG00000181381	DDX60L	chr4	168356736	168537786	rs56999040:169399476:C:T	168478325	168478325	0	9.9e-53	-15.9517	0.895261	59461	Distal eGene eQTLs
ENSG00000164106	SCRG1	chr4	173384702	173406380	rs74861390:174113814:C:T	173192663	173192663	0	1.15e-10	1.63982	0.247701	-23910	Distal non-eGene eQTLs
ENSG00000038002	AGA	chr4	177430771	177442503	rs60625878:178364474:T:C	177443320	177443320	1	8.57e-06	-0.3353	0.0743653	-817	Promoter-eGene eQTLs
ENSG00000164306	PRIMPOL	chr4	184649614	184694963	rs62339863:185570467:A:C	184649313	184649313	0	5.66e-21	1.22331	0.123012	300	Promoter-eGene eQTLs
ENSG00000151726	ACSL1	chr4	184755596	184826818	rs74335426:185747653:TC:T	184826499	184826500	0	3.01e-09	-0.471947	0.0777809	319	Promoter-eGene eQTLs
ENSG00000164323	CFAP97	chr4	185159666	185209504	rs111425386:186123716:C:A	185202562	185202562	1	1.17e-09	-0.619641	0.0994377	6942	Distal eGene eQTLs
ENSG00000164323	CFAP97	chr4	185159666	185209504	rs3108296:186123731:G:T	185202577	185202577	0	2.93e-75	1.0814	0.0470157	6927	Distal eGene eQTLs
ENSG00000109762	SNX25	chr4	185204238	185370185	rs3108243:186126391:C:A	185205237	185205237	0	8.62e-70	10.9182	0.502259	-1000	Promoter-eGene eQTLs
ENSG00000205129	C4orf47	chr4	185426250	185449826	rs11287696:186320666:TA:T	185399512	185399513	0	2.96e-08	-1.70875	0.302158	-3613	Distal non-eGene eQTLs
ENSG00000109775	UFSP2	chr4	185399541	185425985	rs34235464:186348218:CA:C	185427064	185427065	0	3.86e-66	7.84777	0.37552	-1079	Promoter-eGene eQTLs
ENSG00000168491	CCDC110	chr4	185445183	185471759	rs9999033:186391323:G:A	185470169	185470169	0	3.2e-19	0.95559	0.10127	1590	Promoter-eGene eQTLs
ENSG00000145476	CYP4V2	chr4	186191521	186213456	rs7663027:187112629:G:C	186191475	186191475	1	1.36e-14	-0.554518	0.0693204	45	Promoter-eGene eQTLs
ENSG00000164344	KLKB1	chr4	186208980	186258471	exm437864	186191887	186191887	1	3.7e-12	0.485216	0.0676997	-397	Promoter non-eGene eQTLs
ENSG00000083857	FAT1	chr4	186587784	186726722	rs960760:187647136:T:G	186725982	186725982	1	9.63e-06	0.580917	0.129589	740	Promoter-eGene eQTLs
ENSG00000188818	ZDHHC11	chr5	795607	850986	rs3810865:189799:T:C	189684	189684	1	6.47e-06	-0.364384	0.0797117	1827	Promoter non-eGene eQTLs
ENSG00000225138	CTD-2228K2.7	chr5	473237	480884	rs10474783:473580:C:T	473465	473465	2	7.98e-07	0.405418	0.0808423	-229	Promoter-eGene eQTLs
ENSG00000153395	LPCAT1	chr5	1456481	1523977	rs116737947:1514454:G:A	1514339	1514339	1	9.14e-06	0.746537	0.166106	9638	Distal eGene eQTLs
ENSG00000185986	SDHAP3	chr5	1572223	1594620	rs112172852:1596952:C:G	1596837	1596837	0	1.27e-11	-1.188	0.170324	-2217	Promoter-eGene eQTLs
ENSG00000188002	RP11-43F13.1	chr5	1598921	1634005	rs111277130:1634070:C:T	1633955	1633955	1	6.96e-08	0.571483	0.104001	50	Promoter-eGene eQTLs
ENSG00000171421	MRPL36	chr5	1798387	1801366	rs5865385:1803030:A:AT	1802916	1802916	0	7.85e-10	-0.474435	0.0753108	-1550	Promoter-eGene eQTLs
ENSG00000133398	MED10	chr5	6371882	6378594	rs9313147:6377832:A:G	6377719	6377719	0	1.03e-14	0.639641	0.0795678	875	Promoter-eGene eQTLs
ENSG00000215218	UBE2QL1	chr5	6448624	6494909	rs1472757:6455872:T:C	6455759	6455759	1	7e-09	0.47282	0.0798963	-7136	Distal eGene eQTLs
ENSG00000250786	SNHG18	chr5	9546201	9550609	rs59758866:9546372:C:G	9546260	9546260	2	1e-07	-0.439949	0.0810858	-60	Promoter-eGene eQTLs
ENSG00000250786	SNHG18	chr5	9546201	9550609	rs17329324:9547958:C:G	9547846	9547846	3	3.79e-05	-0.452037	0.108487	-1646	Promoter-eGene eQTLs
ENSG00000250786	SNHG18	chr5	9546201	9550609	rs1706987:9547965:C:T	9547853	9547853	0	3.33e-25	0.885804	0.0796905	-1653	Promoter-eGene eQTLs
ENSG00000112977	DAP	chr5	10679231	10761272	rs11740244:10761009:C:G	10760897	10760897	0	2.06e-22	-2.39256	0.231139	375	Promoter-eGene eQTLs
ENSG00000154122	ANKH	chr5	14704805	14871778	rs3006069:14869709:A:G	14869600	14869600	0	2.24e-27	-0.741411	0.0634105	2178	Promoter-eGene eQTLs
ENSG00000150712	MTMR12	chr5	32226995	32313009	rs2910884	32308600	32308600	0	4.11e-08	-0.406761	0.0727083	4409	Distal eGene eQTLs
ENSG00000168724	DNAJC21	chr5	34929594	34958964	rs37429:34931886:T:G	34931781	34931781	0	1.8e-06	0.368228	0.0759832	-2188	Promoter-eGene eQTLs
ENSG00000145604	SKP2	chr5	36151990	36184319	rs74754125:36056912:T:C	36056810	36056810	0	6.95e-07	1.37008	0.271664	14548	Distal non-eGene eQTLs
ENSG00000152620	NADK2	chr5	36192593	36242279	rs884694	36301318	36301318	0	2.24e-08	-1.12908	0.197842	796	Promoter non-eGene eQTLs
ENSG00000164327	RICTOR	chr5	38937920	39074408	rs13184911:39075394:C:T	39075292	39075292	0	8.5e-39	0.824502	0.0566796	-884	Promoter-eGene eQTLs
ENSG00000177453	NIM1K	chr5	43192072	43280850	rs13176855:43245922:C:T	43245820	43245820	0	9.83e-05	0.922382	0.234439	-53749	Distal eGene eQTLs
ENSG00000155542	SETD9	chr5	56909261	56925532	rs185220	56909530	56909530	0	2.35e-72	1.22409	0.05482	-270	Promoter-eGene eQTLs
ENSG00000113448	PDE4D	chr5	58969039	60522120	rs138669344:58267837:AG:A	58972010	58972011	0	1.75e-06	-9.72618	2.00452	1550110	Distal eGene eQTLs
ENSG00000153006	SREK1IP1	chr5	64718145	64768685	rs3756739:64064411:G:C	64768584	64768584	1	5.08e-07	-0.539126	0.105575	101	Promoter-eGene eQTLs
ENSG00000049860	HEXB	chr5	74640024	74722647	rs70976124:73980963:GC:G	74685138	74685139	0	2.84e-06	-1.65575	0.348596	-45115	Distal eGene eQTLs
ENSG00000132846	ZBED3	chr5	77072073	77087323	rs72765104:76327818:C:G	77031993	77031993	0	3.16e-11	-1.05587	0.154593	-2742	Distal non-eGene eQTLs
ENSG00000132837	DMGDH	chr5	78997607	79236038	rs72764988:78533584:G:C	79237761	79237761	0	3.58e-10	0.39429	0.061295	-1723	Promoter-eGene eQTLs
ENSG00000164300	SERINC5	chr5	80111652	80256079	rs3923123:79489514:A:G	80193693	80193693	0	3.51e-12	0.494868	0.0689658	62386	Distal eGene eQTLs
ENSG00000113319	RASGRF2	chr5	80960673	81230156	rs559181:80286819:A:T	80991000	80991000	0	1.85e-05	-4.40422	1.01619	-30328	Distal eGene eQTLs
ENSG00000247572	CKMT2-AS1	chr5	81204085	81301560	rs62365038:80597374:T:C	81301555	81301555	1	5.02e-40	-1.4411	0.0970993	5	Promoter-eGene eQTLs
ENSG00000081189	MEF2C	chr5	88717118	88904257	rs304152:88124123:T:G	88828306	88828306	0	6.95e-09	-4.86771	0.822338	75951	Distal eGene eQTLs
ENSG00000164292	RHOBTB3	chr5	95713523	95824383	rs42862:95070875:C:T	95735171	95735171	0	2.39e-62	-17.8778	0.892629	-21649	Distal eGene eQTLs
ENSG00000251348	HSPD1P11	chr5	95769000	95770700	rs7729314:95096562:G:A	95760858	95760858	0	1.68e-14	0.166232	0.0208607	-47336	Distal non-eGene eQTLs
ENSG00000153113	CAST	chr5	96525268	96779595	rs4434401:96039025:T:C	96703321	96703321	0	1.56e-08	-2.62768	0.455149	-178054	Distal eGene eQTLs
ENSG00000164211	STARD4	chr5	111496034	111512590	rs17458866:110847732:C:T	111512034	111512034	0	2.18e-13	6.54018	0.86105	556	Promoter-eGene eQTLs
ENSG00000129595	EPB41L4A	chr5	112142442	112419316	rs35607075:111668828:TTCTC:T	112333131	112333135	1	3.49e-06	0.745124	0.158356	86185	Distal eGene eQTLs
ENSG00000279522	CTC-487M23.6	chr5	112894934	112896531	rs460137:112196949:A:C	112861252	112861252	0	1.02e-10	0.322284	0.0485311	-64	Promoter non-eGene eQTLs
ENSG00000172795	DCP2	chr5	112976703	113020970	rs138070642:112667123:G:C	113331426	113331426	0	9.13e-06	5.74853	1.27894	-8398	Distal non-eGene eQTLs
ENSG00000129596	CDO1	chr5	115804734	115816954	rs34869:115152694:G:C	115816997	115816997	0	1.58e-20	0.639758	0.0651723	-43	Promoter-eGene eQTLs
ENSG00000145782	ATG12	chr5	115828201	115841858	rs1058600	115831016	115831016	0	1.07e-15	2.74228	0.328147	10842	Distal eGene eQTLs
ENSG00000184838	PRR16	chr5	120464279	120687332	rs1404300:119867182:A:C	120531487	120531487	1	3.9e-05	-0.357438	0.0859315	-67209	Distal eGene eQTLs
ENSG00000168938	PPIC	chr5	123023251	123036741	rs28373879:122372402:G:C	123036707	123036707	0	6.08e-38	-1.21416	0.0846657	34	Promoter-eGene eQTLs
ENSG00000155324	GRAMD3	chr5	126360133	126496494	rs4836266	126489127	126489127	0	5.07e-05	-0.632013	0.154263	-128995	Distal eGene eQTLs
ENSG00000164904	ALDH7A1	chr5	126531201	126595418	HUNT_MISSENSE_2copiesormore_chr5_125930950	126595258	126595258	1	1.21e-17	-1.44832	0.161596	664468	Distal eGene eQTLs
ENSG00000138829	FBN2	chr5	128257910	128659185	rs55770077:127874849:T:C	128539156	128539156	1	2.8e-13	0.916165	0.121215	120029	Distal eGene eQTLs
ENSG00000113396	SLC27A6	chr5	128538014	129033642	rs2526246:128301824:T:A	128966131	128966131	0	2.94e-47	-0.949215	0.0573592	-428118	Distal eGene eQTLs
ENSG00000164398	ACSL6	chr5	131949974	132012243	rs12054732:130969724:T:C	131634031	131634031	2	0.000112126	0.35397	0.0907287	1205	Promoter non-eGene eQTLs
ENSG00000164398	ACSL6	chr5	131949974	132012243	rs253946:131330461:G:A	131994768	131994768	0	4.65e-28	0.90405	0.076159	17475	Distal eGene eQTLs
ENSG00000197375	SLC22A5	chr5	132369753	132395614	rs274557:131721204:T:C	132385512	132385512	0	1.27e-18	-0.578931	0.062534	-15760	Distal eGene eQTLs
ENSG00000164404	GDF9	chr5	132861182	132866884	rs30179:132201875:G:A	132866183	132866183	0	4.36e-16	0.420942	0.0496382	701	Promoter-eGene eQTLs
ENSG00000164405	UQCRQ	chr5	132866561	132868031	rs35994411:132278152:CT:C	132942460	132942461	0	4.33e-05	-1.52865	0.369707	472	Promoter non-eGene eQTLs
ENSG00000198944	SOWAHA	chr5	132813588	132816797	rs7714274:132295729:A:G	132960037	132960037	1	3.41e-05	0.303987	0.0725173	3597	Distal non-eGene eQTLs
ENSG00000170606	HSPA4	chr5	133051963	133106449	rs3088225	133051568	133051568	0	7.36e-40	30.7411	2.07684	394	Promoter-eGene eQTLs
ENSG00000164615	CAMLG	chr5	134738502	134752160	exm478567	134741122	134741122	0	5.78e-48	5.03546	0.301287	-2621	Distal eGene eQTLs
ENSG00000113648	H2AFY	chr5	135333901	135399914	5:134670498:T:TTAAAAA	135334808	135334808	0	5.8e-09	-0.923297	0.155139	65106	Distal eGene eQTLs
ENSG00000112981	NME5	chr5	138115173	138139443	rs17637720:137475056:T:G	138139367	138139367	0	4.09e-24	-4.57488	0.422786	76	Promoter-eGene eQTLs
ENSG00000170469	SPATA24	chr5	139396564	139404088	rs201294294:137744089:AAAAG:A	138408400	138408404	0	9.03e-05	0.657972	0.166349	-55804	Distal non-eGene eQTLs
ENSG00000120306	CYSTM1	chr5	140174643	140282052	rs17523262:139554866:G:C	140175281	140175281	1	2.31e-10	-0.701661	0.107859	-639	Promoter-eGene eQTLs
ENSG00000131495	NDUFA2	chr5	140638741	140647785	rs56094200:140028326:GT:G	140648741	140648742	0	4.19e-05	0.78873	0.190407	-956	Promoter-eGene eQTLs
ENSG00000081842	PCDHA6	chr5	140827959	141012344	rs62624460:140221098:C:G	140841513	140841513	1	7.43e-06	0.535496	0.117935	-13555	Distal eGene eQTLs
ENSG00000204961	PCDHA9	chr5	140847464	141012344	rs251352:140227876:G:A	140848291	140848291	0	3.52e-17	-0.608924	0.069031	-828	Promoter-eGene eQTLs
ENSG00000204962	PCDHA8	chr5	140841188	141012344	exm2256973	140967127	140967127	0	1.56e-06	-0.38527	0.0790029	-125940	Distal eGene eQTLs
ENSG00000113209	PCDHB5	chr5	141135219	141138625	rs33952885:140522561:C:CT	141142980	141142980	0	1.95e-10	0.715889	0.109573	31411	Distal non-eGene eQTLs
ENSG00000253846	PCDHGA10	chr5	141412988	141512979	rs251022:140892643:T:C	141513076	141513076	0	2.05e-05	0.301045	0.0698283	-100089	Distal eGene eQTLs
ENSG00000253485	PCDHGA5	chr5	141364233	141512979	rs10044763:140937935:T:C	141558368	141558368	1	3.23e-05	-0.6648	0.158109	-57	Promoter non-eGene eQTLs
ENSG00000081791	KIAA0141	chr5	141923809	141942047	rs56390916:141261835:C:T	141882270	141882270	0	3.97e-07	-2.64068	0.51213	-3024	Distal non-eGene eQTLs
ENSG00000113552	GNPDA1	chr5	141991750	142013041	rs11167762:141355646:T:C	141976081	141976081	0	2.48e-05	1.4853	0.348117	-17753	Distal non-eGene eQTLs
ENSG00000183775	KCTD16	chr5	144170833	144485686	rs2112659:143591023:A:G	144211460	144211460	0	4.38e-07	-0.606604	0.118097	-40628	Distal eGene eQTLs
ENSG00000186314	PRELID2	chr5	145471800	145835369	rs10079977:145216591:G:T	145837028	145837028	0	1.35e-13	-2.68157	0.349804	-1659	Promoter-eGene eQTLs
ENSG00000113657	DPYSL3	chr5	147390812	147510056	rs1121657:146827429:C:A	147447866	147447866	0	5.27e-06	28.9321	6.26739	62190	Distal eGene eQTLs
ENSG00000248647	RP11-331K21.1	chr5	149163956	149276776	rs13153921:148522498:A:G	149142935	149142935	1	2.62e-12	0.491832	0.0681181	133841	Distal eGene eQTLs
ENSG00000248647	RP11-331K21.1	chr5	149163956	149276776	rs5004316:148543691:C:G	149164128	149164128	0	3.57e-35	1.59159	0.116464	112648	Distal eGene eQTLs
ENSG00000169247	SH3TC2	chr5	148923640	149063163	rs10067003:148547490:C:T	149167927	149167927	0	1.85e-14	6.11967	0.769294	-26444	Distal non-eGene eQTLs
ENSG00000173210	ABLIM3	chr5	149141484	149260542	rs70973510:148604794:A:ACCTCTATCTAGTTCC	149225231	149225231	0	9.53e-12	-8.83117	1.25798	-83748	Distal eGene eQTLs
ENSG00000253406	AC012613.2	chr5	149216524	149276805	rs748066	149240972	149240972	0	6.31e-41	3.25193	0.215978	35833	Distal eGene eQTLs
ENSG00000145882	PCYOX1L	chr5	149358008	149369653	rs13160429:148764914:A:G	149385351	149385351	0	1.19e-12	0.486198	0.0662257	18851	Distal non-eGene eQTLs
ENSG00000155846	PPARGC1B	chr5	149730299	149855022	rs59806347:149203350:G:C	149823787	149823787	0	4.17e-08	9.04844	1.61821	-93489	Distal eGene eQTLs
ENSG00000132915	PDE6A	chr5	149857956	149944793	rs245067:149286357:T:C	149906794	149906794	0	1.02e-10	382.488	57.6047	37999	Distal eGene eQTLs
ENSG00000113716	HMGXB3	chr5	150000047	150053142	rs245050:149346960:C:G	149967397	149967397	0	7.64e-12	-0.54337	0.0770237	-6660	Distal non-eGene eQTLs
ENSG00000183876	ARSI	chr5	150296344	150339307	rs891942:149700006:T:G	150320443	150320443	0	5.26e-10	-0.287549	0.0451567	18864	Distal eGene eQTLs
ENSG00000214485	RPL7P1	chr5	150094303	150095048	rs2545339:149911219:A:G	150531657	150531657	0	3.73e-05	-0.152125	0.0364752	-45839	Distal non-eGene eQTLs
ENSG00000197083	ZNF300P1	chr5	150930646	150946289	rs4958851:150327519:C:A	150947957	150947957	1	1.91e-08	-0.372432	0.0649219	-1668	Promoter-eGene eQTLs
ENSG00000197043	ANXA6	chr5	151100713	151157882	rs10039049:150517899:T:C	151138338	151138338	0	4.62e-18	-0.637522	0.0701356	19544	Distal eGene eQTLs
ENSG00000197043	ANXA6	chr5	151100713	151157882	rs1862362:150530679:A:G	151151118	151151118	2	1.94e-05	0.322311	0.0745394	6764	Distal eGene eQTLs
ENSG00000113272	THG1L	chr5	157731198	157741448	rs2270820	157731364	157731364	0	1.82e-15	0.608286	0.0734437	-167	Promoter-eGene eQTLs
ENSG00000113645	WWC1	chr5	168291652	168472303	rs10866628:167847658:A:T	168420653	168420653	0	3.78e-58	1.02222	0.0536181	-129002	Distal eGene eQTLs
ENSG00000233913	CTC-575D19.1	chr5	168616353	168616996	rs138172428:167849253:G:A	168422248	168422248	0	1.08e-06	3.50395	0.707471	-130597	Distal non-eGene eQTLs
ENSG00000182132	KCNIP1	chr5	170353488	170736632	exm-rs11957313	170523390	170523390	0	5.46e-15	-1.43376	0.176385	-169903	Distal eGene eQTLs
ENSG00000113739	STC2	chr5	173314714	173329503	rs7717222:172999225:A:G	173572222	173572222	0	2.66e-08	-3.82002	0.673146	-9744	Distal non-eGene eQTLs
ENSG00000145919	BOD1	chr5	173607515	173616660	rs7717222:172999225:A:G	173572222	173572222	2	2.4e-05	-0.385443	0.0901729	-9744	Distal non-eGene eQTLs
ENSG00000169228	RAB24	chr5	177301199	177303744	rs9313754:176730678:C:G	177303677	177303677	0	4.9e-08	1.35431	0.243524	67	Promoter-eGene eQTLs
ENSG00000175309	PHYKPL	chr5	178208498	178232791	rs138665724:177659463:C:A	178232462	178232462	0	5.96e-07	0.639357	0.125997	329	Promoter-eGene eQTLs
ENSG00000252464	RN7SKP70	chr5	178619729	178619998	rs111815874:178053708:A:ACGGC	178626707	178626707	0	1.21e-05	0.246022	0.0555254	3908	Distal non-eGene eQTLs
ENSG00000197226	TBC1D9B	chr5	179862067	179907859	rs185073:179334857:A:G	179907857	179907857	0	2.1e-06	4.12226	0.856296	2	Promoter-eGene eQTLs
ENSG00000050748	MAPK9	chr5	180233144	180292099	rs55901738:179741374:C:A	180314374	180314374	0	3.37e-22	2.71764	0.264071	39013	Distal non-eGene eQTLs
ENSG00000131446	MGAT1	chr5	180784783	180815652	exm-rs655601	180799673	180799673	0	9.11e-12	-5.93358	0.844373	15979	Distal eGene eQTLs
ENSG00000196670	ZFP62	chr5	180847612	180861285	rs647739:180256102:C:G	180829102	180829102	0	5.21e-07	-2.65242	0.519928	1855	Promoter non-eGene eQTLs
ENSG00000146054	TRIM7	chr5	181193925	181205293	rs114579724:180687907:C:A	181260906	181260906	1	1.74e-05	-1.12951	0.259756	233	Promoter non-eGene eQTLs
ENSG00000124570	SERPINB6	chr6	2948160	2972165	rs7751512	2966447	2966447	0	4.86e-28	5.52556	0.465682	5718	Distal eGene eQTLs
ENSG00000224846	RP1-90J20.8	chr6	2989723	2999134	rs9378351:2999243:C:T	2999009	2999009	0	1.8e-64	0.722997	0.0352416	125	Promoter-eGene eQTLs
ENSG00000124588	NQO2	chr6	2987988	3028869	rs2071002:3000303:A:C	3000069	3000069	2	4e-06	-0.353371	0.0755699	-12082	Distal eGene eQTLs
ENSG00000180822	PSMG4	chr6	3231404	3303373	rs6596960:3260924:C:G	3260690	3260690	0	1.89e-18	-2.52147	0.273869	-29287	Distal eGene eQTLs
ENSG00000214113	LYRM4	chr6	5102594	5260939	rs7771066:5260385:A:T	5260152	5260152	1	1.15e-05	-0.567837	0.127834	787	Promoter-eGene eQTLs
ENSG00000145982	FARS2	chr6	5261045	5771580	rs13191012:5261292:G:A	5261059	5261059	0	5.76e-06	-0.364616	0.0793209	-15	Promoter-eGene eQTLs
ENSG00000124491	F13A1	chr6	6144086	6321013	rs9504725:6230207:G:A	6229974	6229974	0	4.05e-26	113.194	9.96406	91039	Distal eGene eQTLs
ENSG00000111846	GCNT2	chr6	10492224	10629368	rs506720:10558089:C:G	10557856	10557856	0	3.93e-05	-0.376915	0.0906561	-65633	Distal eGene eQTLs
ENSG00000111837	MAK	chr6	10762724	10838555	rs75580201:10833317:T:G	10833084	10833084	0	2.97e-07	-23.4114	4.49013	5471	Distal eGene eQTLs
ENSG00000124523	SIRT5	chr6	13574530	13615158	rs112443954:13574491:G:C	13574259	13574259	0	1.56e-22	-1.47258	0.141798	270	Promoter-eGene eQTLs
ENSG00000271888	RP11-560J1.2	chr6	15243924	15245000	rs7771939:15269455:G:A	15269224	15269224	0	9.74e-11	0.233583	0.0351366	-22928	Distal non-eGene eQTLs
ENSG00000137364	TPMT	chr6	18128312	18155074	rs35237970:18142308:A:G	18142077	18142077	0	4.93e-12	1.78036	0.249954	12997	Distal eGene eQTLs
ENSG00000124795	DEK	chr6	18223869	18264823	rs34969716:18210109:G:A	18209878	18209878	0	8.18e-13	4.54896	0.614904	-54549	Distal non-eGene eQTLs
ENSG00000165097	KDM1B	chr6	18155330	18223853	rs11453678:18210561:T:TC	18210330	18210330	0	3.2e-07	2.08747	0.401533	-55001	Distal eGene eQTLs
ENSG00000228412	RP4-625H18.2	chr6	19324989	19839080	rs6456272:19805036:C:G	19804805	19804805	1	4.3e-11	-0.664535	0.0980037	34275	Distal eGene eQTLs
ENSG00000112242	E2F3	chr6	20401907	20493715	rs1887476	20265734	20265734	0	1.04e-29	2.75158	0.223772	-53647	Distal non-eGene eQTLs
ENSG00000260455	NBAT1	chr6	22134958	22147193	rs72836115:22148017:T:C	22147788	22147788	0	1.56e-05	-0.23877	0.0546009	-595	Promoter-eGene eQTLs
ENSG00000124532	MRS2	chr6	24402909	24426194	rs79747846:24403196:T:C	24402968	24402968	0	3.45e-27	-5.09432	0.43755	-60	Promoter-eGene eQTLs
ENSG00000137261	KIAA0319	chr6	24544105	24646155	rs11456603:24666320:T:TA	24666092	24666092	1	9.65e-07	0.54481	0.109489	941	Promoter non-eGene eQTLs
ENSG00000124508	BTN2A2	chr6	26383097	26394874	rs56023587:26402614:G:C	26402386	26402386	0	6e-13	0.821481	0.110346	-149	Promoter non-eGene eQTLs
ENSG00000112763	BTN2A1	chr6	26457905	26476621	rs2273193:26458525:C:G	26458297	26458297	0	2.48e-18	-0.705071	0.0768758	-393	Promoter-eGene eQTLs
ENSG00000216901	ZNF603P	chr6	28176189	28176674	rs200949:27835435:A:G	27867657	27867657	2	8.55e-08	-0.642008	0.117672	-2302	Promoter non-eGene eQTLs
ENSG00000197279	ZNF165	chr6	28080976	28089563	rs34778634:28110307:GT:G	28142529	28142530	0	2.69e-08	-0.46508	0.0819824	-619	Promoter non-eGene eQTLs
ENSG00000197062	ZSCAN26	chr6	28267011	28278224	rs1736895:28219826:G:A	28252048	28252048	0	2.31e-30	-2.78029	0.223074	176	Promoter non-eGene eQTLs
ENSG00000137288	UQCC2	chr6	33694294	33711727	rs113148757:33661059:CCT:C	33693282	33693284	1	6.97e-08	-1.2465	0.226859	18445	Distal eGene eQTLs
ENSG00000137288	UQCC2	chr6	33694294	33711727	rs10672:33662265:T:C	33694488	33694488	0	4.66e-30	-0.765252	0.0617834	17239	Distal eGene eQTLs
ENSG00000198755	RPL10A	chr6	35468409	35470785	6:35458067:T:TG	35490290	35490290	1	7.61e-09	-1.3124	0.222328	6786	Distal non-eGene eQTLs
ENSG00000112041	TULP1	chr6	35497875	35512938	exm541395	35511797	35511797	0	4.72e-30	47.5882	3.84254	1141	Promoter-eGene eQTLs
ENSG00000112130	RNF8	chr6	37353973	37394738	rs195420:37321807:C:G	37354031	37354031	0	1.12e-08	-0.876291	0.150204	-59	Promoter-eGene eQTLs
ENSG00000112139	MDGA1	chr6	37630680	37699306	rs45627433:37664482:C:G	37696706	37696706	1	3.09e-05	0.479831	0.11385	2600	Distal eGene eQTLs
ENSG00000112130	RNF8	chr6	37353973	37394738	rs79484090:37796269:A:G	37828493	37828493	1	2.69e-05	-1.10472	0.260101	-8994	Distal non-eGene eQTLs
ENSG00000183826	BTBD9	chr6	38168452	38640148	rs12198616:38144000:G:C	38176224	38176224	0	1.25e-12	0.520181	0.0709259	463924	Distal eGene eQTLs
ENSG00000161912	ADCY10P1	chr6	41101023	41140835	rs62396284:41041947:T:A	41074208	41074208	0	3.66e-24	1.11599	0.10301	-1263	Promoter non-eGene eQTLs
ENSG00000164663	USP49	chr6	41789897	41895361	rs34841111:41858116:C:CA	41890378	41890378	0	8.08e-06	1.25802	0.278206	4983	Distal eGene eQTLs
ENSG00000112619	PRPH2	chr6	42696601	42722574	exm2270317	42691014	42691014	0	1.3e-08	-50.2997	8.66244	31560	Distal eGene eQTLs
ENSG00000024048	UBR2	chr6	42564063	42693504	rs9462817:42671766:A:G	42704028	42704028	0	8.3e-10	2.46516	0.391896	-139966	Distal eGene eQTLs
ENSG00000124587	PEX6	chr6	42963871	42979220	rs9462859:42946943:G:A	42979205	42979205	0	1.2e-46	3.59224	0.218963	15	Promoter-eGene eQTLs
ENSG00000112640	PPP2R5D	chr6	42984500	43012342	rs1969759:42955524:C:T	42987786	42987786	0	3.19e-06	-0.52106	0.110271	-3287	Distal eGene eQTLs
ENSG00000124733	MEA1	chr6	43012095	43013968	rs116750300:42981633:C:A	43013895	43013895	0	7.14e-24	5.6401	0.524431	73	Promoter-eGene eQTLs
ENSG00000272223	RP1-20C7.6	chr6	43033898	43034405	rs143683138:42989920:T:G	43022182	43022182	0	4.06e-06	-0.524815	0.112304	-537	Promoter non-eGene eQTLs
ENSG00000180992	MRPL14	chr6	44113455	44127457	rs9462964:44101276:T:C	44133539	44133539	0	1.38e-28	-1.6297	0.135722	-6625	Distal non-eGene eQTLs
ENSG00000112782	CLIC5	chr6	45898452	46080395	rs66474103:46018079:CAT:C	46050342	46050344	0	5.22e-16	1.25376	0.148274	30053	Distal eGene eQTLs
ENSG00000001561	ENPP4	chr6	46129994	46146699	rs66474103:46018079:CAT:C	46050342	46050344	0	7.43e-09	4.51324	0.764023	30053	Distal non-eGene eQTLs
ENSG00000112796	ENPP5	chr6	46159188	46170971	rs66474103:46018079:CAT:C	46050342	46050344	1	3.28e-05	0.661681	0.157522	30053	Distal non-eGene eQTLs
ENSG00000112796	ENPP5	chr6	46159188	46170971	rs3756802:46095836:G:A	46128099	46128099	0	6.09e-16	-0.557938	0.0661497	1607	Promoter non-eGene eQTLs
ENSG00000188107	EYS	chr6	63719981	65707225	rs2812772:66408008:T:C	65698115	65698115	0	2.58e-21	-17.3753	1.73026	9110	Distal eGene eQTLs
ENSG00000112706	IMPG1	chr6	75921116	76072678	rs1326170:76760305:C:T	76050588	76050588	0	4.78e-25	0.748039	0.0675531	22090	Distal eGene eQTLs
ENSG00000146250	PRSS35	chr6	83512539	83525704	rs481687:84222177:C:T	83512458	83512458	0	2.39e-06	6.50981	1.36012	80	Promoter-eGene eQTLs
ENSG00000203875	SNHG5	chr6	85660951	85678736	rs1059307:86387888:G:T	85678170	85678170	0	2.3e-75	4.95894	0.215367	566	Promoter-eGene eQTLs
ENSG00000164414	SLC35A1	chr6	87470624	87512336	rs144273778:88183335:G:GCAGTTAGAAGGAACACT	87473617	87473617	0	2.5e-07	-0.666133	0.126943	-2994	Distal eGene eQTLs
ENSG00000146281	PM20D2	chr6	89146051	89165565	rs66688820:89790559:CTTCA:C	89080840	89080844	0	6.44e-12	-0.524504	0.0740673	-173	Promoter non-eGene eQTLs
ENSG00000112182	BACH2	chr6	89926530	90296908	rs140777868:90089369:C:T	89379650	89379650	0	2.56e-05	1.89891	0.44585	32620	Distal non-eGene eQTLs
ENSG00000025039	RRAGD	chr6	89364637	89412270	rs854922:90121950:G:A	89412231	89412231	1	2.37e-05	-0.542497	0.126837	39	Promoter-eGene eQTLs
ENSG00000083099	LYRM2	chr6	89568145	89638753	rs11755610:90597428:G:A	89887709	89887709	0	3.02e-12	0.509648	0.0707991	-1553	Promoter non-eGene eQTLs
ENSG00000112218	GPR63	chr6	96794127	96837463	rs150998871:97285511:GGGCAAGTAAAGAGGGAGGA:G	96837635	96837654	0	2.67e-21	0.279121	0.0278069	-172	Promoter-eGene eQTLs
ENSG00000228439	TSTD3	chr6	99520694	99531918	exm2270373	99510942	99510942	0	7.78e-18	-0.182	0.0201739	10786	Distal non-eGene eQTLs
ENSG00000112238	PRDM13	chr6	99606731	99615578	rs2271116:100441795:A:G	99993919	99993919	0	3.97e-05	0.264549	0.0636612	25	Promoter non-eGene eQTLs
ENSG00000130348	QRSL1	chr6	106629579	106668417	rs2054365:107077502:G:A	106629627	106629627	0	4.24e-66	-3.39784	0.162661	-49	Promoter-eGene eQTLs
ENSG00000185250	PPIL6	chr6	109390216	109441171	rs3778477:109776058:C:G	109454855	109454855	0	2.95e-06	0.480703	0.101385	11113	Distal non-eGene eQTLs
ENSG00000187189	TSPYL4	chr6	116249962	116254140	rs1204833:116572828:A:G	116251665	116251665	0	5.49e-12	-4.30778	0.606207	2475	Promoter-eGene eQTLs
ENSG00000111817	DSE	chr6	116254174	116444860	rs17077741:116577145:A:G	116255982	116255982	1	2.57e-06	0.585869	0.1228	-1809	Promoter-eGene eQTLs
ENSG00000111834	RSPH4A	chr6	116616480	116632985	rs13213314:116938232:C:G	116617069	116617069	0	4.2e-09	0.644055	0.107186	-590	Promoter-eGene eQTLs
ENSG00000111834	RSPH4A	chr6	116616480	116632985	rs11269665:116946213:CCTTAAGGATAATCAAGTGG:C	116625050	116625069	1	2.05e-07	0.368308	0.0696663	-8571	Distal eGene eQTLs
ENSG00000111875	ASF1A	chr6	118894221	118909167	rs11542663:119215402:A:C	118894238	118894238	0	1.97e-05	-0.630831	0.146036	-18	Promoter-eGene eQTLs
ENSG00000146350	TBC1D32	chr6	121079495	121334745	rs9490162:121655392:A:G	121334246	121334246	0	1.39e-05	-5.34699	1.21529	499	Promoter-eGene eQTLs
ENSG00000164434	FABP7	chr6	122779476	122784074	rs116881654:123100438:G:T	122779293	122779293	0	5.7e-06	-22.566	4.90691	182	Promoter-eGene eQTLs
ENSG00000111906	HDDC2	chr6	125219963	125302078	rs73581685:125623247:C:T	125302101	125302101	0	6.89e-39	-1.17476	0.0806365	-23	Promoter-eGene eQTLs
ENSG00000066651	TRMT11	chr6	125986431	126039276	rs141871928:126277880:G:T	125956734	125956734	1	8.37e-06	-0.787095	0.174366	47	Promoter non-eGene eQTLs
ENSG00000219302	RP11-174C7.3	chr6	129819638	129820170	rs9492400:130168949:T:C	129847804	129847804	2	1.45e-10	0.584802	0.0888379	13743	Distal non-eGene eQTLs
ENSG00000219302	RP11-174C7.3	chr6	129819638	129820170	rs72993272:130180651:T:C	129859506	129859506	1	6.05e-13	0.721867	0.0969833	2041	Promoter non-eGene eQTLs
ENSG00000079819	EPB41L2	chr6	130839348	131063322	rs6569708:131179932:G:T	130858792	130858792	0	2.06e-08	-30.1527	5.26956	204530	Distal eGene eQTLs
ENSG00000118507	AKAP7	chr6	131135667	131283535	rs58646840:131261464:C:T	130940324	130940324	0	3.21e-15	1.63423	0.199212	122998	Distal non-eGene eQTLs
ENSG00000118507	AKAP7	chr6	131135667	131283535	rs9402320:131456733:G:C	131135593	131135593	1	1.47e-08	-0.730703	0.126322	73	Promoter-eGene eQTLs
ENSG00000028839	TBPL1	chr6	133952171	133990432	rs3777894:134277442:A:C	133956304	133956304	0	1.31e-08	-0.730082	0.125772	-4134	Distal eGene eQTLs
ENSG00000118514	ALDH8A1	chr6	134917391	134950122	rs2327578:135329969:C:T	135008831	135008831	0	3.73e-71	-1.34546	0.0610119	94225	Distal non-eGene eQTLs
ENSG00000112357	PEX7	chr6	136822565	136913937	rs9389450:137243020:G:T	136921882	136921882	1	1.07e-09	-0.420263	0.0672758	382	Promoter non-eGene eQTLs
ENSG00000027697	IFNGR1	chr6	137197485	137219449	rs7749390	137219233	137219233	0	2.94e-07	1.61228	0.30911	216	Promoter-eGene eQTLs
ENSG00000237499	RP11-356I2.4	chr6	137823674	137868233	rs10499198:138266431:C:T	137945294	137945294	0	1.1e-28	-2.10532	0.174963	72	Promoter non-eGene eQTLs
ENSG00000112378	PERP	chr6	138088506	138107511	rs505121:138415329:T:C	138094192	138094192	0	2.43e-12	1.57318	0.217521	13319	Distal eGene eQTLs
ENSG00000051620	HEBP2	chr6	138403532	138422197	rs11441776:138725317:C:CG	138404180	138404180	0	9.49e-56	-8.47823	0.457952	-649	Promoter-eGene eQTLs
ENSG00000146386	ABRACL	chr6	139028683	139043302	rs12196247:139350182:G:A	139029045	139029045	0	2.78e-10	-0.347935	0.0537354	-363	Promoter-eGene eQTLs
ENSG00000111961	SASH1	chr6	148272305	148552050	rs9403943:148650366:T:C	148329230	148329230	1	1.35e-06	0.477619	0.0973418	-56926	Distal eGene eQTLs
ENSG00000271551	RP11-230C9.2	chr6	156776361	156778422	rs9397968	156792483	156792483	0	1.2e-07	-0.694847	0.1289	-14061	Distal eGene eQTLs
ENSG00000130338	TULP4	chr6	158232237	158511828	rs262820:158663101:G:T	158242069	158242069	0	1.17e-37	-0.821157	0.0575363	-9833	Distal eGene eQTLs
ENSG00000271913	RP1-111C20.4	chr6	158988179	159064925	rs9295089:159463964:T:C	159042932	159042932	0	5.18e-05	-0.30359	0.0741946	-54754	Distal eGene eQTLs
ENSG00000146457	WTAP	chr6	159725586	159756319	rs193058938:160182796:G:C	159761764	159761764	1	1.49e-10	1.7111	0.260107	-1436	Promoter non-eGene eQTLs
ENSG00000112110	MRPL18	chr6	159789813	159798436	rs58504486:160211645:GGTT:G	159790613	159790616	0	2.51e-13	-1.46764	0.19376	-801	Promoter-eGene eQTLs
ENSG00000229921	KIF25-AS1	chr6	167992823	167997077	rs62426260:168397705:A:G	167997025	167997025	1	8.81e-22	0.724746	0.0712352	52	Promoter-eGene eQTLs
ENSG00000235994	RP3-470B24.5	chr6	167975925	167979776	rs62426260:168397705:A:G	167997025	167997025	1	1.13e-22	0.738775	0.0708749	-784	Promoter non-eGene eQTLs
ENSG00000184465	WDR27	chr6	169457213	169702048	rs4716371:170055316:C:G	169655220	169655220	0	2.45e-19	-1.42862	0.150856	46828	Distal eGene eQTLs
ENSG00000249852	AC145676.2	chr7	227555	229557	rs62430332:229248:T:G	229248	229248	0	1.35e-05	-0.32223	0.0731267	309	Promoter-eGene eQTLs
ENSG00000073067	CYP2W1	chr7	983200	989640	rs10233430:1051664:T:C	1012028	1012028	0	4.83e-18	-0.180035	0.0198185	126232	Distal non-eGene eQTLs
ENSG00000122687	MRM2	chr7	2234232	2242198	rs59235082:2273614:G:GA	2233979	2233979	0	3.61e-27	0.733211	0.0630017	-736	Promoter non-eGene eQTLs
ENSG00000235944	ZNF815P	chr7	5823161	5854435	rs7784409:5862830:C:G	5823199	5823199	0	9.36e-07	0.173135	0.0347506	-39	Promoter-eGene eQTLs
ENSG00000122512	PMS2	chr7	5973240	6009125	rs1062372	6009342	6009342	0	2.09e-22	-0.736592	0.0711723	-217	Promoter-eGene eQTLs
ENSG00000106392	C1GALT1	chr7	7156935	7248651	rs4720726:7225451:G:A	7185820	7185820	0	7.55e-27	0.769363	0.0665916	-28886	Distal eGene eQTLs
ENSG00000219545	UMAD1	chr7	7640712	7968020	rs11978146	7730480	7730480	0	4.31e-06	-0.413974	0.0888339	-89769	Distal eGene eQTLs
ENSG00000233264	AC006042.8	chr7	7980313	7982228	rs12531825:8005174:G:A	7965543	7965543	0	6.93e-06	-0.241925	0.0531013	-324832	Distal non-eGene eQTLs
ENSG00000229108	MEOX2-AS1	chr7	15688379	15695491	rs740565:15726985:A:C	15687360	15687360	0	1.34e-08	-0.326786	0.0563383	1018	Promoter-eGene eQTLs
ENSG00000272361	GS1-166A23.2	chr7	16593627	16594224	rs7807897:16626210:G:T	16586585	16586585	0	2.9e-19	0.291502	0.0308516	172	Promoter non-eGene eQTLs
ENSG00000136261	BZW2	chr7	16646132	16706523	rs706029:16702107:G:C	16662482	16662482	0	1.92e-17	-9.71526	1.09139	-16351	Distal eGene eQTLs
ENSG00000106524	ANKMY2	chr7	16599777	16645817	NHGRI_notinECorHUNT_chr7_16707861	16668236	16668236	2	1.63e-05	0.911719	0.208945	-61730	Distal non-eGene eQTLs
ENSG00000122591	FAM126A	chr7	22889372	23014130	rs62449832:22895911:A:G	22856292	22856292	0	1.14e-17	-0.73551	0.08199	-2114	Promoter non-eGene eQTLs
ENSG00000136243	NUPL2	chr7	23181828	23201011	rs858295:23245569:A:G	23205950	23205950	0	6.14e-54	-2.42886	0.134218	63	Promoter non-eGene eQTLs
ENSG00000105928	DFNA5	chr7	24698354	24758113	rs1001821:24796541:C:G	24756922	24756922	0	1.59e-33	1.06488	0.0803172	1191	Promoter-eGene eQTLs
ENSG00000214870	AC004540.5	chr7	26398594	26494256	rs1238010:26438728:T:G	26399108	26399108	0	5.5e-12	-0.984244	0.138511	-515	Promoter-eGene eQTLs
ENSG00000280255	RP5-1007F24.1	chr7	26538379	26541048	rs1013688	26399711	26399711	1	1.75e-12	-0.476662	0.0654521	-1118	Promoter non-eGene eQTLs
ENSG00000122565	CBX3	chr7	26201163	26213356	rs12674232:26449731:G:C	26410111	26410111	0	2.27e-05	11.6535	2.71851	-11518	Distal non-eGene eQTLs
ENSG00000106069	CHN2	chr7	29122275	29514328	rs3828979:29519298:G:A	29479682	29479682	0	1.28e-17	-0.646941	0.0722396	-357408	Distal eGene eQTLs
ENSG00000106086	PLEKHA8	chr7	30027405	30130483	rs10275475	30028010	30028010	0	3.13e-07	2.66459	0.512075	-606	Promoter-eGene eQTLs
ENSG00000106080	FKBP14	chr7	30010588	30026684	rs10260418:30068028:G:A	30028412	30028412	0	1.24e-07	-1.41499	0.26276	-1728	Promoter-eGene eQTLs
ENSG00000244480	AC005154.7	chr7	30523144	30524535	rs76038928:30633142:T:C	30593526	30593526	1	1.18e-07	0.836263	0.155013	1155	Promoter non-eGene eQTLs
ENSG00000154678	PDE1C	chr7	31751180	32299329	rs10241729:32289879:A:G	32250267	32250267	0	8.88e-21	0.757015	0.076554	49062	Distal eGene eQTLs
ENSG00000211695	TRGV9	chr7	38317018	38318861	rs2534568:38359640:G:A	38320039	38320039	0	8.01e-16	-0.65972	0.0785702	-1178	Promoter-eGene eQTLs
ENSG00000106628	POLD2	chr7	44114682	44124358	rs55784724:44151986:G:A	44112387	44112387	0	1.34e-08	-5.30578	0.914736	-8026	Distal non-eGene eQTLs
ENSG00000058404	CAMK2B	chr7	44217151	44334577	rs62459094:44263869:C:A	44224270	44224270	0	2.53e-05	-3.8078	0.893552	110307	Distal eGene eQTLs
ENSG00000132437	DDC	chr7	50458437	50565457	rs3807563:50566390:C:T	50498692	50498692	0	6.22e-08	-12.873	2.33361	66765	Distal eGene eQTLs
ENSG00000106078	COBL	chr7	51016213	51316818	rs12719037:51208953:T:C	51141256	51141256	0	1.56e-16	7.02305	0.814673	175562	Distal eGene eQTLs
ENSG00000170419	VSTM2A	chr7	54542326	54571080	rs2204133	54551443	54551443	0	3e-20	0.607495	0.0623949	-9118	Distal eGene eQTLs
ENSG00000234444	ZNF736	chr7	64307460	64354860	rs147835206:63774358:G:T	64313980	64313980	1	3.47e-07	1.65573	0.319456	-6521	Distal eGene eQTLs
ENSG00000227986	TRIM60P18	chr7	64355079	64356199	rs147835206:63774358:G:T	64313980	64313980	0	3.6e-05	1.34978	0.323025	-6521	Distal non-eGene eQTLs
ENSG00000226824	RP4-756H11.3	chr7	66654539	66669855	rs11772636:66136722:T:C	66671735	66671735	0	6.02e-34	0.596056	0.0446036	-42854	Distal non-eGene eQTLs
ENSG00000225718	RP11-3P22.2	chr7	69224697	69430923	rs4236234:68892309:A:G	69427323	69427323	0	1.62e-05	-0.342034	0.0783615	3600	Distal eGene eQTLs
ENSG00000106682	EIF4H	chr7	74174246	74197101	rs150881:73589359:T:C	74175029	74175029	0	1.86e-07	-15.6493	2.94947	-784	Promoter-eGene eQTLs
ENSG00000127948	POR	chr7	75899201	75986855	rs72553971:75544247:C:A	75914929	75914929	0	1.2e-13	-2.67306	0.347891	-15729	Distal eGene eQTLs
ENSG00000146701	MDH2	chr7	76048052	76067508	rs41296488:75595580:C:T	75966262	75966262	0	7.36e-08	2.73123	0.498007	-67062	Distal non-eGene eQTLs
ENSG00000213542	RP11-467H10.1	chr7	77115400	77116192	rs71555938:76751068:G:C	77121751	77121751	1	7.35e-07	-0.48399	0.0961864	365	Promoter non-eGene eQTLs
ENSG00000205485	AC004980.7	chr7	76549361	76627982	rs71085442:76752557:G:GA	77123240	77123240	1	1.07e-05	0.350873	0.0786749	-1124	Promoter non-eGene eQTLs
ENSG00000127947	PTPN12	chr7	77537276	77640071	rs6960252:77168385:G:A	77539068	77539068	0	2.15e-07	2.67116	0.506168	-1793	Promoter-eGene eQTLs
ENSG00000214293	APTR	chr7	77657661	77696265	rs4727461:77320388:G:A	77691071	77691071	1	2.49e-09	-0.421585	0.0691083	5194	Distal eGene eQTLs
ENSG00000214293	APTR	chr7	77657661	77696265	rs34370301:77321144:G:A	77691827	77691827	0	1.75e-32	-1.21095	0.0931583	4438	Distal eGene eQTLs
ENSG00000170381	SEMA3E	chr7	83363907	83649010	rs302124	83640490	83640490	0	1.47e-07	-0.362303	0.0676947	8520	Distal eGene eQTLs
ENSG00000235436	DPY19L2P4	chr7	90119401	90125600	rs35210694:89573094:GA:G	89943780	89943781	0	2.69e-08	1.0568	0.186281	267855	Distal non-eGene eQTLs
ENSG00000105792	CFAP69	chr7	90245175	90311063	rs60499345:90032543:CT:C	90403229	90403230	0	1.79e-09	-1.42102	0.23075	205	Promoter non-eGene eQTLs
ENSG00000157214	STEAP2	chr7	90167591	90238137	rs149714223:90203862:A:C	90574548	90574548	2	7.49e-06	-1.2147	0.267637	-108124	Distal non-eGene eQTLs
ENSG00000157259	GATAD1	chr7	92447454	92458836	rs113199895:92078393:T:G	92449079	92449079	1	4.61e-08	-0.814067	0.146079	-1626	Promoter-eGene eQTLs
ENSG00000127928	GNGT1	chr7	93591574	93911265	rs59805398:93521261:G:C	93891949	93891949	0	4.21e-09	-53.1146	8.83983	-300376	Distal eGene eQTLs
ENSG00000105825	TFPI2	chr7	93885398	93890991	rs59805398:93521261:G:C	93891949	93891949	0	7.95e-13	-10.1493	1.37112	-958	Promoter-eGene eQTLs
ENSG00000127995	CASD1	chr7	94509220	94557019	rs2301645:94139580:G:T	94510268	94510268	0	7.88e-11	-4.20823	0.629732	-1049	Promoter-eGene eQTLs
ENSG00000164713	BRI3	chr7	98252380	98310441	rs142786157:97858973:TC:T	98229661	98229662	0	1.37e-12	-1.22224	0.166983	22590	Distal non-eGene eQTLs
ENSG00000006453	BAIAP2L1	chr7	98291652	98401068	rs62479858:97924226:C:T	98294914	98294914	0	4.81e-10	-0.223915	0.0350815	106154	Distal eGene eQTLs
ENSG00000239521	GATS	chr7	100200654	100272218	rs117168341:99478371:T:C	99880748	99880748	1	9.3e-07	-1.39412	0.27974	38852	Distal non-eGene eQTLs
ENSG00000160862	AZGP1	chr7	99966721	99976157	rs148475353:99511293:C:CAAAT	99913670	99913670	0	3.38e-10	0.882543	0.136995	5930	Distal non-eGene eQTLs
ENSG00000166529	ZSCAN21	chr7	100049775	100065038	rs3807479:99716901:C:G	100119278	100119278	0	1.62e-19	-0.929528	0.0976108	335	Promoter non-eGene eQTLs
ENSG00000168090	COPS6	chr7	100088955	100092200	rs150040950:99765662:CAGAG:C	100168039	100168043	1	5.06e-06	-0.360973	0.0780451	711	Promoter non-eGene eQTLs
ENSG00000146830	GIGYF1	chr7	100679508	100689448	rs221789:100271521:T:C	100673898	100673898	0	1.02e-10	-0.638972	0.0962149	-367	Promoter non-eGene eQTLs
ENSG00000196411	EPHB4	chr7	100802566	100827521	rs76367760:100450224:G:A	100852602	100852602	0	6.69e-07	0.582726	0.115369	14	Promoter non-eGene eQTLs
ENSG00000087087	SRRT	chr7	100875112	100888664	rs34773098:100476324:G:GT	100878703	100878703	0	3.26e-05	-2.30237	0.547912	-3592	Distal eGene eQTLs
ENSG00000146828	SLC12A9	chr7	100826821	100867009	rs13241786:100486656:T:G	100889035	100889035	0	3.1e-09	0.43666	0.0720288	683	Promoter non-eGene eQTLs
ENSG00000106400	ZNHIT1	chr7	101217669	101224190	rs79140247:100892521:G:C	101249240	101249240	0	1.48e-18	-1.41593	0.153265	3076	Distal non-eGene eQTLs
ENSG00000239969	RP11-163E9.2	chr7	102364163	102380633	rs811680:102004730:C:T	102364283	102364283	1	1.91e-05	0.340963	0.078799	-121	Promoter-eGene eQTLs
ENSG00000170667	RASA4B	chr7	102482446	102517781	rs78748541:102106816:T:TA	102466369	102466369	0	1.55e-08	5.23431	0.906483	-1493	Promoter non-eGene eQTLs
ENSG00000272949	RP11-514P8.8	chr7	102483345	102543764	rs78748541:102106816:T:TA	102466369	102466369	0	1.04e-06	1.54813	0.312107	-1493	Promoter non-eGene eQTLs
ENSG00000161036	LRWD1	chr7	102464930	102473168	rs3800988:102113093:T:C	102472646	102472646	0	2.3e-52	-1.71553	0.0967412	-7717	Distal eGene eQTLs
ENSG00000228049	POLR2J2	chr7	102665369	102671629	rs72603518:102113256:T:C	102472809	102472809	0	7.6e-07	0.789556	0.157125	-7880	Distal non-eGene eQTLs
ENSG00000170615	SLC26A5	chr7	103352731	103446177	rs35650730:103036487:C:T	103396040	103396040	0	6.21e-42	-0.3849	0.025163	50137	Distal eGene eQTLs
ENSG00000161057	PSMC2	chr7	103344255	103369395	rs35650730:103036487:C:T	103396040	103396040	0	6.58e-07	-1.73802	0.343876	50137	Distal non-eGene eQTLs
ENSG00000164815	ORC5	chr7	104126342	104208047	rs10238218	104203749	104203749	0	2.36e-11	1.0558	0.153528	4298	Distal eGene eQTLs
ENSG00000225329	LHFPL3-AS2	chr7	104894629	104926645	rs11561931:104524092:G:A	104883645	104883645	0	1.64e-14	0.54757	0.0686848	-554989	Distal non-eGene eQTLs
ENSG00000091129	NRCAM	chr7	108147624	108456717	rs11397633:107964713:G:GT	108324269	108324269	0	1.18e-08	7.91792	1.35943	132448	Distal eGene eQTLs
ENSG00000105971	CAV2	chr7	116287381	116508541	rs917664:116167444:A:T	116527390	116527390	0	9.79e-06	-2.242	0.500552	-2605	Distal non-eGene eQTLs
ENSG00000198898	CAPZA2	chr7	116811071	116922049	rs2299441:116504829:G:C	116864775	116864775	0	2.16e-05	-2.23966	0.521053	-53705	Distal eGene eQTLs
ENSG00000106299	WASL	chr7	123681936	123749067	rs7780086:123378471:C:A	123738417	123738417	0	6.71e-07	-1.74687	0.345883	10650	Distal eGene eQTLs
ENSG00000106348	IMPDH1	chr7	128392278	128410252	rs144398561:128048075:A:AT	128408021	128408021	0	2.36e-12	-0.894262	0.123571	2231	Promoter-eGene eQTLs
ENSG00000230715	RP11-274B21.4	chr7	128652842	128653243	rs372435126:128171272:AC:A	128531218	128531219	0	5.28e-19	0.490327	0.0523199	-149	Promoter non-eGene eQTLs
ENSG00000205085	FAM71F2	chr7	128672267	128683319	rs6953269:128247332:C:T	128607278	128607278	0	7.81e-12	-0.535361	0.0759244	-73626	Distal non-eGene eQTLs
ENSG00000158623	COPG2	chr7	130506239	130668748	rs6962200:130340761:A:T	130655921	130655921	0	7.76e-09	2.18942	0.371125	12827	Distal eGene eQTLs
ENSG00000273489	RP11-180C16.1	chr7	131493965	131497694	rs112350050:131197667:C:T	131512908	131512908	1	2.2e-05	-0.525302	0.122327	7229	Distal non-eGene eQTLs
ENSG00000105894	PTN	chr7	137227342	137343865	rs17168993:136916751:G:C	137232004	137232004	0	1.64e-05	4.99625	1.14521	111861	Distal eGene eQTLs
ENSG00000122778	KIAA1549	chr7	138831382	138981318	rs79520825:138615432:A:G	138930686	138930686	0	7.75e-15	0.996714	0.123371	50632	Distal eGene eQTLs
ENSG00000122778	KIAA1549	chr7	138831382	138981318	rs540649:138639832:C:A	138955086	138955086	1	2.09e-11	-0.548816	0.0795807	26232	Distal eGene eQTLs
ENSG00000105939	ZC3HAV1	chr7	139043521	139109719	rs11525873:138817193:T:C	139132447	139132447	0	4.63e-07	1.30761	0.255124	1297	Promoter non-eGene eQTLs
ENSG00000133597	ADCK2	chr7	140673154	140696261	rs10241711:140384809:T:C	140685009	140685009	0	5.07e-08	0.849484	0.152926	-11856	Distal eGene eQTLs
ENSG00000106462	EZH2	chr7	148807384	148884321	rs243523:148419484:A:C	148722392	148722392	0	9.67e-06	0.865085	0.193025	-24478	Distal non-eGene eQTLs
ENSG00000261305	RP4-584D14.7	chr7	150341772	150342607	rs1962004:150020381:G:A	150323292	150323292	0	1.64e-20	0.353028	0.0359797	-653	Promoter non-eGene eQTLs
ENSG00000188707	ZBED6CL	chr7	150329790	150332721	rs2373751:150021599:G:C	150324510	150324510	0	1.45e-51	-1.26256	0.0719455	-1871	Promoter non-eGene eQTLs
ENSG00000002933	TMEM176A	chr7	150800404	150805120	rs741068:150500356:T:C	150803268	150803268	0	6.52e-08	2.43384	0.44193	-2865	Distal eGene eQTLs
ENSG00000055118	KCNH2	chr7	150944962	150978315	rs3807370	150976226	150976226	0	2.3e-05	-1.57698	0.36808	2089	Promoter-eGene eQTLs
ENSG00000244151	RP11-148K1.12	chr7	151074743	151076530	rs9097:150778424:G:T	151081337	151081337	0	2.13e-07	0.197613	0.0374322	-471	Promoter non-eGene eQTLs
ENSG00000033050	ABCF2	chr7	151207838	151227230	rs219230:150941609:C:T	151244523	151244523	0	3.16e-14	1.85918	0.236002	33373	Distal non-eGene eQTLs
ENSG00000164889	SLC4A2	chr7	151057211	151076527	rs57302152:150974792:G:A	151277706	151277706	0	3.04e-06	3.96093	0.836428	190	Promoter non-eGene eQTLs
ENSG00000164897	TMUB1	chr7	151081081	151083546	rs57302152:150974792:G:A	151277706	151277706	0	4.34e-06	1.42859	0.306653	190	Promoter non-eGene eQTLs
ENSG00000261455	LINC01003	chr7	152463787	152465549	rs10254368:152161975:T:C	152464890	152464890	0	3.69e-10	-0.498511	0.0775586	-1104	Promoter-eGene eQTLs
ENSG00000196584	XRCC2	chr7	152644780	152676165	rs3218384:152373252:C:G	152676167	152676167	0	1.23e-90	1.79587	0.0674757	-2	Promoter-eGene eQTLs
ENSG00000146910	CNPY1	chr7	155474207	155555450	rs1863039:155326585:T:C	155533890	155533890	0	2.01e-21	0.482841	0.0479362	21560	Distal eGene eQTLs
ENSG00000126870	WDR60	chr7	158856579	158956747	rs842694:158660977:G:T	158868286	158868286	0	3.71e-41	-1.00499	0.0665043	-11708	Distal eGene eQTLs
ENSG00000180190	TDRP	chr8	489793	545781	rs2084414	541735	541735	0	2.8e-15	0.634437	0.0771586	4046	Distal eGene eQTLs
ENSG00000183638	RP1L1	chr8	10606350	10712187	rs4841407	10658675	10658675	0	7.3e-21	-28.6267	2.88777	53512	Distal eGene eQTLs
ENSG00000254093	PINX1	chr8	10764964	10839884	rs4841408:10516336:A:G	10658826	10658826	0	1.12e-09	0.558216	0.0894787	53361	Distal non-eGene eQTLs
ENSG00000184608	FAM167A-AS1	chr8	11368403	11438658	rs7816601:11205593:T:C	11348084	11348084	0	2.66e-43	-0.616335	0.0394579	-582	Promoter non-eGene eQTLs
ENSG00000154328	NEIL2	chr8	11769640	11787346	rs2686211:11628375:T:A	11770866	11770866	1	1.53e-08	0.44491	0.0770185	-1227	Promoter-eGene eQTLs
ENSG00000251468	RP11-369K16.1	chr8	12958388	12962200	rs7830329:12834768:T:G	12977259	12977259	0	7.77e-29	0.7706	0.0638335	-31617	Distal non-eGene eQTLs
ENSG00000250305	KIAA1456	chr8	12945643	13031503	rs7004313:12871588:A:G	13014079	13014079	1	1.63e-07	0.474818	0.089052	-68437	Distal eGene eQTLs
ENSG00000155970	MICU3	chr8	17027239	17122644	rs55892425:16945134:A:G	17087625	17087625	0	1.56e-05	1.88085	0.429978	-60387	Distal eGene eQTLs
ENSG00000198791	CNOT7	chr8	17224965	17246878	rs2904699:17090798:G:A	17233289	17233289	0	2.39e-05	-3.32344	0.777396	13589	Distal eGene eQTLs
ENSG00000003989	SLC7A2	chr8	17497089	17570573	rs2588228:17390525:T:G	17533016	17533016	0	4.46e-14	0.569418	0.0727401	-35928	Distal eGene eQTLs
ENSG00000104213	PDGFRL	chr8	17576434	17644071	rs10109530:17465603:T:G	17608094	17608094	0	3.17e-48	0.613117	0.0365516	-31661	Distal eGene eQTLs
ENSG00000129422	MTUS1	chr8	17643796	17800917	rs73206294:17613761:G:C	17756252	17756252	2	9.01e-06	0.505211	0.112327	44665	Distal eGene eQTLs
ENSG00000156011	PSD3	chr8	18527302	19084730	rs7002540:18870349:G:A	19012839	19012839	0	3.31e-11	9.34376	1.36951	71891	Distal eGene eQTLs
ENSG00000158856	DMTN	chr8	22048996	22082527	rs77582956:21906779:G:C	22049268	22049268	0	1.81e-09	4.72454	0.767462	-273	Promoter-eGene eQTLs
ENSG00000197181	PIWIL2	chr8	22275298	22357563	rs4871990	22275324	22275324	0	5.78e-39	-1.34715	0.0923524	-27	Promoter-eGene eQTLs
ENSG00000134020	PEBP4	chr8	22713252	23000000	rs73218763:22785047:C:T	22927534	22927534	0	5.81e-32	-0.924282	0.0718262	72466	Distal eGene eQTLs
ENSG00000197217	ENTPD4	chr8	23385784	23457695	8:23314918:C:CCGCGGGGCTGAGCGGGCAGCGGCGGTGG	23457405	23457405	0	1.83e-06	-4.40924	0.910444	290	Promoter-eGene eQTLs
ENSG00000147437	GNRH1	chr8	25419261	25424654	rs17053446:25216620:A:T	25359104	25359104	0	3.8e-05	0.435662	0.104581	-174381	Distal non-eGene eQTLs
ENSG00000120899	PTK2B	chr8	27311483	27459391	rs7006183:27168820:C:A	27311303	27311303	0	1.28e-25	4.15795	0.370359	179	Promoter-eGene eQTLs
ENSG00000120885	CLU	chr8	27596918	27615031	exm-rs1532278	27608798	27608798	0	1.3e-13	-142.281	18.5447	6233	Distal eGene eQTLs
ENSG00000165392	WRN	chr8	31033802	31173769	rs73235700:31500420:G:A	31642904	31642904	0	1.47e-05	0.463995	0.10575	-3518	Distal non-eGene eQTLs
ENSG00000169499	PLEKHA2	chr8	38901236	38973909	rs4076625	38936939	38936939	0	3.73e-10	0.448679	0.0698248	-35704	Distal eGene eQTLs
ENSG00000169490	TM2D2	chr8	38988809	38996824	exm696976	38996522	38996522	0	1.72e-19	-1.84541	0.193938	302	Promoter-eGene eQTLs
ENSG00000158669	GPAT4	chr8	41577188	41625001	rs71546397:41401221:CT:C	41543702	41543703	0	3.74e-06	-0.548031	0.116839	1342	Promoter non-eGene eQTLs
ENSG00000083168	KAT6A	chr8	41929480	42051990	rs56756690:41897420:A:AT	42039902	42039902	0	1.54e-05	-2.70484	0.617958	12088	Distal eGene eQTLs
ENSG00000168522	FNTA	chr8	43034195	43085788	rs71521601:42698041:A:G	42842898	42842898	0	2.11e-11	-6.61531	0.959454	427	Promoter non-eGene eQTLs
ENSG00000147485	PXDNL	chr8	51319579	51809445	rs4573263:52675273:A:C	51762713	51762713	0	1.23e-16	-0.62322	0.072026	46732	Distal eGene eQTLs
ENSG00000120992	LYPLA1	chr8	54046368	54102017	rs2292590:55047706:C:G	54135146	54135146	0	1.75e-15	-7.71324	0.930659	64	Promoter non-eGene eQTLs
ENSG00000215114	UBXN2B	chr8	58411265	58451501	rs143584397:59323244:T:C	58410685	58410685	0	1.01e-11	-0.529564	0.0755331	579	Promoter-eGene eQTLs
ENSG00000179041	RRS1	chr8	66429029	66430733	rs5892075:67963002:GA:G	67050767	67050768	0	6.42e-05	0.526929	0.13044	5837	Distal non-eGene eQTLs
ENSG00000147586	MRPS28	chr8	79918718	80030289	rs73251916:80835751:C:A	79923516	79923516	0	3.13e-07	-1.56434	0.300653	106773	Distal eGene eQTLs
ENSG00000164683	HEY1	chr8	79764011	79767863	rs34908025:80940829:T:C	80028594	80028594	0	8.01e-06	-1.86396	0.41202	1695	Promoter non-eGene eQTLs
ENSG00000133731	IMPA1	chr8	81657962	81686693	rs2912821	81686673	81686673	0	2.72e-12	-0.520033	0.0720779	20	Promoter-eGene eQTLs
ENSG00000147614	ATP6V0D2	chr8	85987324	86154228	rs10096162:87031502:C:G	86019273	86019273	0	3.89e-05	-0.294998	0.0709097	-31950	Distal eGene eQTLs
ENSG00000170289	CNGB3	chr8	86553978	86743675	rs62622781:87755955:A:T	86743727	86743727	0	3.51e-21	-1.65746	0.165683	-52	Promoter-eGene eQTLs
ENSG00000205333	GOLGA2P1	chr8	86657389	86660293	rs62622781:87755955:A:T	86743727	86743727	1	1.09e-09	-1.10406	0.17681	-52	Promoter non-eGene eQTLs
ENSG00000170289	CNGB3	chr8	86553978	86743675	rs147446638:87755964:A:G	86743736	86743736	1	2.42e-08	-1.35978	0.238877	-61	Promoter-eGene eQTLs
ENSG00000156162	DPY19L4	chr8	94719704	94793836	rs36005749:95752094:T:TC	94739866	94739866	0	1.1e-11	0.498111	0.0711889	-20163	Distal eGene eQTLs
ENSG00000164938	TP53INP1	chr8	94925973	94949411	rs1320164:95960767:G:A	94948539	94948539	0	1.47e-05	3.97014	0.9049	872	Promoter-eGene eQTLs
ENSG00000156170	NDUFAF6	chr8	94895768	95116455	rs4582532:95969257:G:A	94957029	94957029	0	4.82e-06	0.547812	0.118178	-61262	Distal eGene eQTLs
ENSG00000175895	PLEKHF2	chr8	95133805	95156684	rs145057604:96150785:C:CTTTT	95138557	95138557	0	1.45e-06	-2.00638	0.410182	-4753	Distal eGene eQTLs
ENSG00000156172	C8orf37	chr8	95244920	95269201	rs80283666:96281985:C:T	95269757	95269757	0	9.17e-11	1.75083	0.262975	-556	Promoter-eGene eQTLs
ENSG00000156471	PTDSS1	chr8	96261716	96336995	rs13276829:97274990:G:A	96262762	96262762	0	4.59e-05	0.622087	0.150961	-1047	Promoter-eGene eQTLs
ENSG00000169439	SDC2	chr8	96493352	96611780	rs2589201	96538884	96538884	0	4.36e-13	2.64721	0.353313	-45533	Distal eGene eQTLs
ENSG00000104324	CPQ	chr8	96645228	97149654	rs2651449:97657894:G:A	96645666	96645666	0	3.33e-14	1.23016	0.156301	-439	Promoter-eGene eQTLs
ENSG00000104341	LAPTM4B	chr8	97775058	97853013	rs2449556:98812563:A:G	97800335	97800335	0	1.86e-06	-17.8516	3.68842	-25278	Distal eGene eQTLs
ENSG00000132561	MATN2	chr8	97868841	98036716	rs2331806:98941841:C:A	97929613	97929613	0	1.96e-25	0.687079	0.0614716	-60773	Distal eGene eQTLs
ENSG00000177459	ERICH5	chr8	98064312	98093610	rs79924902:99091097:T:G	98078869	98078869	0	1.7e-07	0.579643	0.108888	-14558	Distal eGene eQTLs
ENSG00000048392	RRM2B	chr8	102204503	102239118	rs5893604:103251564:GCCCCATT:G	102239336	102239343	1	9.03e-07	-0.524578	0.105134	-218	Promoter-eGene eQTLs
ENSG00000147654	EBAG9	chr8	109539712	109565996	rs141411589:110551839:CCTGAGG:C	109539610	109539616	0	3.38e-06	0.972	0.206249	101	Promoter-eGene eQTLs
ENSG00000147676	MAL2	chr8	119165035	119245673	rs3739420:120220595:G:T	119208356	119208356	1	2.08e-12	-0.594247	0.0818969	-43322	Distal eGene eQTLs
ENSG00000156787	TBC1D31	chr8	123041969	123152153	rs6470138:124101880:A:G	123089640	123089640	0	1.95e-12	0.766635	0.10551	-47672	Distal eGene eQTLs
ENSG00000176853	FAM91A1	chr8	123768457	123815452	rs7840837:124706629:G:A	123694389	123694389	0	7.95e-14	-4.67342	0.603487	43018	Distal non-eGene eQTLs
ENSG00000183665	TRMT12	chr8	124450821	124462150	rs11556913:125463544:T:C	124451303	124451303	0	1.7e-06	-0.500669	0.103049	-483	Promoter-eGene eQTLs
ENSG00000169398	PTK2	chr8	140657901	141002216	rs7010459:141831241:T:C	140821142	140821142	0	2e-29	-6.81932	0.557876	181074	Distal eGene eQTLs
ENSG00000261150	EPPK1	chr8	143857325	143878464	rs73715518:144952041:C:T	143877873	143877873	0	7.21e-09	-0.262427	0.0443838	591	Promoter-eGene eQTLs
ENSG00000254402	LRRC24	chr8	144522378	144527032	rs138776721:145016810:C:G	143942642	143942642	0	2.44e-08	2.88694	0.507296	2637	Distal non-eGene eQTLs
ENSG00000178209	PLEC	chr8	143915148	143976734	rs6991364:145050345:G:A	143976177	143976177	1	2.48e-07	-0.378943	0.0721906	557	Promoter-eGene eQTLs
ENSG00000178685	PARP10	chr8	143977154	144012772	8:145069127:A:AGGG	143994959	143994959	0	1.11e-08	-1.43012	0.245079	17813	Distal eGene eQTLs
ENSG00000160948	VPS28	chr8	144423602	144428563	rs190185812:145653903:G:C	144428520	144428520	0	5.13e-15	3.77406	0.463794	43	Promoter-eGene eQTLs
ENSG00000161016	RPL8	chr8	144789766	144792587	rs3808374:146018780:C:G	144793395	144793395	0	1.35e-08	-7.67375	1.32324	-808	Promoter-eGene eQTLs
ENSG00000179632	MAF1	chr8	144104500	144107611	rs2956169:146175432:T:C	144950046	144950046	0	2.33e-05	-1.56264	0.365051	842	Promoter non-eGene eQTLs
ENSG00000277631	PGM5P3-AS1	chr9	72675	88826	rs9407330:73986:A:G	73986	73986	0	3.72e-06	0.720036	0.153459	-1312	Promoter-eGene eQTLs
ENSG00000218839	FAM138C	chr9	34395	35871	rs9407330:73986:A:G	73986	73986	0	1.85e-15	-16.8486	2.03466	-1312	Promoter non-eGene eQTLs
ENSG00000183784	C9orf66	chr9	212825	215741	rs147666929:402417:C:CA	402417	402417	1	4.84e-06	0.569182	0.122812	-187563	Distal non-eGene eQTLs
ENSG00000147853	AK3	chr9	4709560	4742043	rs7038082:4742161:C:T	4742161	4742161	1	1.94e-07	0.644808	0.121725	-118	Promoter-eGene eQTLs
ENSG00000225489	RP11-390F4.3	chr9	6716496	6727438	rs2278548:6704556:G:T	6704556	6704556	1	4.18e-11	-0.631889	0.0931297	-85	Promoter non-eGene eQTLs
ENSG00000225706	PTPRD-AS1	chr9	8858131	8862255	rs34242138:8855866:T:A	8855866	8855866	1	2.03e-07	-0.462603	0.0874761	2264	Promoter-eGene eQTLs
ENSG00000225706	PTPRD-AS1	chr9	8858131	8862255	rs77301379:8858303:C:G	8858303	8858303	0	7.8e-29	1.13909	0.0943614	-173	Promoter-eGene eQTLs
ENSG00000164985	PSIP1	chr9	15464067	15511019	rs2737836:15505523:A:G	15505525	15505525	0	3.57e-10	22.7082	3.53001	5494	Distal eGene eQTLs
ENSG00000107295	SH3GL2	chr9	17579083	17797129	rs720268:17738857:C:T	17738859	17738859	0	1.38e-07	4.42709	0.825406	-159777	Distal eGene eQTLs
ENSG00000099810	MTAP	chr9	21802544	21937651	rs116962631:21490093:T:C	21490094	21490094	1	3.24e-06	-0.485005	0.102723	69575	Distal non-eGene eQTLs
ENSG00000120162	MOB3B	chr9	27325210	27529781	rs11788796:27333527:T:A	27333529	27333529	0	2.43e-07	-2.55203	0.485808	196252	Distal eGene eQTLs
ENSG00000230453	ANKRD18B	chr9	33524395	33573009	rs2777744	33473895	33473895	0	1.8e-10	-0.443666	0.06777	35	Promoter non-eGene eQTLs
ENSG00000260947	RP11-384P7.7	chr9	33697460	33700986	rs2275003:34124860:A:G	34124862	34124862	1	1.35e-08	-0.397227	0.0684933	2537	Distal non-eGene eQTLs
ENSG00000122735	DNAI1	chr9	34457415	34520989	rs1328536:34505481:C:T	34505483	34505483	0	1.89e-11	0.491722	0.0711444	-48069	Distal eGene eQTLs
ENSG00000261215	RP11-195F19.30	chr9	34661904	34666029	rs913836:34664672:C:T	34664675	34664675	0	1.17e-08	-0.2744	0.0471	1354	Promoter-eGene eQTLs
ENSG00000137101	CD72	chr9	35609534	35646810	rs146706624:35604543:T:C	35604546	35604546	0	2.01e-06	-1.20625	0.25009	759	Promoter non-eGene eQTLs
ENSG00000137103	TMEM8B	chr9	35814452	35854847	rs10738948	35833451	35833451	0	1.7e-14	-1.17064	0.146929	-19000	Distal eGene eQTLs
ENSG00000137101	CD72	chr9	35609534	35646810	rs10560364:36402491:TA:T	36402494	36402495	1	8.77e-06	0.331624	0.0736348	85054	Distal non-eGene eQTLs
ENSG00000168795	ZBTB5	chr9	37438115	37465399	rs10758430:37466599:G:C	37466602	37466602	0	1.56e-07	-1.10492	0.206919	-1203	Promoter-eGene eQTLs
ENSG00000119139	TJP2	chr9	69121265	69255208	rs7850573:71747260:G:A	69132344	69132344	0	9.67e-27	0.714319	0.0619794	-11080	Distal eGene eQTLs
ENSG00000119139	TJP2	chr9	69121265	69255208	exm753538	69205232	69205232	1	3.74e-05	-0.728439	0.174701	-83968	Distal eGene eQTLs
ENSG00000135048	TMEM2	chr9	71683367	71816690	rs7870312:74381344:C:T	71766428	71766428	0	9.3e-11	6.47554	0.972955	50262	Distal eGene eQTLs
ENSG00000135002	RFK	chr9	76385518	76394517	rs11548955:79009366:G:A	76394450	76394450	0	1.32e-09	-1.71362	0.275926	67	Promoter-eGene eQTLs
ENSG00000234618	RPSAP9	chr9	76398700	76399586	rs2490583:79009689:G:T	76394773	76394773	0	1.89e-13	0.17733	0.0232807	-256	Promoter non-eGene eQTLs
ENSG00000254473	RP11-522I20.3	chr9	83707595	83713378	rs961807:86325050:T:C	83710135	83710135	0	1.1e-08	0.18693	0.032025	-2541	Distal eGene eQTLs
ENSG00000135049	AGTPBP1	chr9	85546540	85742029	rs7869135:88354900:G:C	85739985	85739985	0	6.22e-43	-22.7048	1.46172	2044	Promoter-eGene eQTLs
ENSG00000165023	DIRAS2	chr9	90609833	90643105	rs1017754:93409910:C:T	90647628	90647628	0	2.25e-09	-0.423368	0.0691992	-4523	Distal eGene eQTLs
ENSG00000130956	HABP4	chr9	96450202	96491336	rs1885426:99212378:C:T	96450096	96450096	0	4.17e-07	-0.363751	0.0706831	105	Promoter-eGene eQTLs
ENSG00000081377	CDC14B	chr9	96490242	96619830	rs1885426:99212378:C:T	96450096	96450096	0	9.29e-07	-1.22332	0.245461	105	Promoter non-eGene eQTLs
ENSG00000224848	RP11-535M15.1	chr9	96687057	96721121	rs2165890	96686282	96686282	0	2.37e-35	-0.555395	0.0405114	774	Promoter-eGene eQTLs
ENSG00000130956	HABP4	chr9	96450202	96491336	rs728210:100175478:G:C	97413196	97413196	1	4.77e-05	-0.324156	0.0788417	-1246	Promoter non-eGene eQTLs
ENSG00000136936	XPA	chr9	97674910	97697357	rs5899316:100397696:CT:C	97635414	97635415	0	8.21e-06	0.60008	0.132808	-1839	Promoter non-eGene eQTLs
ENSG00000165029	ABCA1	chr9	104781003	104928237	rs2437817	104927776	104927776	0	1.16e-07	-0.36622	0.0678487	461	Promoter-eGene eQTLs
ENSG00000106701	FSD1L	chr9	105447797	105552433	rs62575094:108210212:A:C	105447931	105447931	0	3.46e-08	-7.42518	1.31976	-135	Promoter-eGene eQTLs
ENSG00000119326	CTNNAL1	chr9	108942570	109013529	rs145699891:111769200:T:TA	109006920	109006920	0	2.76e-30	1.39604	0.112185	6609	Distal eGene eQTLs
ENSG00000106853	PTGR1	chr9	111562578	111599855	rs41279067:114361659:G:C	111599379	111599379	0	2.98e-36	-1.10085	0.0790261	476	Promoter-eGene eQTLs
ENSG00000059769	DNAJC25	chr9	111631353	111654351	rs10981001:114425109:A:C	111662829	111662829	0	2.14e-44	-4.34831	0.273853	-1494	Promoter non-eGene eQTLs
ENSG00000106868	SUSD1	chr9	112040786	112175408	rs117242578:114665214:C:T	111902934	111902934	1	4.78e-05	1.19576	0.290855	-6168	Distal non-eGene eQTLs
ENSG00000119471	HSDL2	chr9	112379938	112472410	rs4979108	112377853	112377853	0	2.18e-22	-2.32099	0.224372	2084	Promoter-eGene eQTLs
ENSG00000165185	KIAA1958	chr9	112486848	112669397	rs35308071:115334174:CT:C	112571894	112571895	0	2.08e-07	0.365924	0.0692529	-85047	Distal eGene eQTLs
ENSG00000119431	HDHD3	chr9	113373420	113376999	rs111758952:116138460:C:T	113376180	113376180	0	8.24e-20	-0.718047	0.0747276	819	Promoter-eGene eQTLs
ENSG00000095397	WHRN	chr9	114402081	114505450	rs731421:117176949:C:T	114414669	114414669	0	5.96e-13	0.573038	0.0769635	90781	Distal eGene eQTLs
ENSG00000226752	PSMD5-AS1	chr9	120824829	120851355	rs72298225:123605711:CGAAGGCGTGAGTAATA:C	120843433	120843449	0	1.69e-116	-4.75365	0.143885	-18605	Distal eGene eQTLs
ENSG00000056558	TRAF1	chr9	120902394	120929173	rs3761849:123690957:C:T	120928679	120928679	1	2.07e-08	0.422961	0.0739284	494	Promoter-eGene eQTLs
ENSG00000175764	TTLL11	chr9	121821929	122093606	rs201653732:124855330:G:GTGGCCT	122093051	122093051	0	1.82e-13	0.578172	0.0758533	555	Promoter-eGene eQTLs
ENSG00000136930	PSMB7	chr9	124353467	124415444	exm780727	124414882	124414882	0	1.13e-20	-2.28375	0.231663	562	Promoter-eGene eQTLs
ENSG00000119414	PPP6C	chr9	125146574	125189939	rs972299:127903180:G:A	125140901	125140901	0	1.33e-12	-0.5218	0.0712432	2605	Distal non-eGene eQTLs
ENSG00000165219	GAPVD1	chr9	125261795	125367207	rs1874943:128123334:G:A	125361055	125361055	0	2.49e-18	4.30648	0.469584	-99261	Distal eGene eQTLs
ENSG00000167081	PBX3	chr9	125747346	125967377	rs670051:128397455:C:G	125635176	125635176	0	1.81e-05	-3.54062	0.815878	72058	Distal non-eGene eQTLs
ENSG00000148356	LRSAM1	chr9	127451487	127503501	rs7045790	127121527	127121527	0	3.33e-05	0.898669	0.214099	1356	Promoter non-eGene eQTLs
ENSG00000136908	DPM2	chr9	127935100	127938484	rs62585306:130717961:G:A	127955682	127955682	0	5.34e-06	1.03994	0.225413	24831	Distal non-eGene eQTLs
ENSG00000232850	PTGES2-AS1	chr9	128128530	128130628	rs884115:130887856:C:T	128125577	128125577	0	7.53e-11	0.213842	0.0319646	2952	Distal eGene eQTLs
ENSG00000106976	DNM1	chr9	128191656	128255248	rs3003597:130977520:C:G	128215241	128215241	0	1.34e-08	-6.63002	1.14299	-23586	Distal eGene eQTLs
ENSG00000119392	GLE1	chr9	128504701	128542288	rs56164320:131267212:C:G	128504933	128504933	0	6.28e-14	-3.62992	0.466672	-233	Promoter-eGene eQTLs
ENSG00000175854	SWI5	chr9	128275380	128288990	rs56145547:131590866:C:T	128828587	128828587	0	4.2e-05	-0.993033	0.239749	1234	Promoter non-eGene eQTLs
ENSG00000175287	PHYHD1	chr9	128920896	128942041	rs7048932	128925059	128925059	0	9.69e-24	-4.14374	0.3866	-4164	Distal eGene eQTLs
ENSG00000148341	SH3GLB2	chr9	129007037	129028303	rs11537529:131790531:C:T	129028252	129028252	0	2.97e-06	-0.85617	0.180622	51	Promoter-eGene eQTLs
ENSG00000125482	TTF1	chr9	132375549	132406851	rs1571855:135282055:C:A	132406668	132406668	0	1.4e-05	-0.598804	0.136131	183	Promoter-eGene eQTLs
ENSG00000160323	ADAMTS13	chr9	133414359	133459402	rs2296809:136227017:G:A	133360141	133360141	1	1.33e-06	-0.687069	0.139939	-3589	Distal non-eGene eQTLs
ENSG00000148300	REXO4	chr9	133406060	133418096	9:136242221:C:CAA	133375350	133375350	0	3.14e-06	0.786433	0.166319	816	Promoter non-eGene eQTLs
ENSG00000148290	SURF1	chr9	133351756	133356676	rs28478009:136281886:T:C	133416766	133416766	0	1.44e-19	0.935907	0.0981262	-2408	Promoter non-eGene eQTLs
ENSG00000160293	VAV2	chr9	133761895	133992604	rs2789852:136809052:T:C	133943930	133943930	0	1.59e-43	2.80513	0.17898	48674	Distal eGene eQTLs
ENSG00000235106	LINC00094	chr9	134025440	134034666	rs2520094:136919985:A:T	134054863	134054863	0	2.38e-11	0.55808	0.0811746	-573	Promoter non-eGene eQTLs
ENSG00000169925	BRD3	chr9	134030306	134068535	rs146671954:136934203:G:A	134069081	134069081	0	1.01e-17	-0.769096	0.0855745	-546	Promoter-eGene eQTLs
ENSG00000165661	QSOX2	chr9	136206334	136245841	rs35244336:139141908:C:A	136250062	136250062	0	1.48e-13	-1.89386	0.247476	-84	Promoter non-eGene eQTLs
ENSG00000262075	DKFZP434A062	chr9	136322304	136327323	rs28595751:139224736:T:C	136330280	136330280	0	7.61e-18	14.5528	1.61263	-2957	Distal eGene eQTLs
ENSG00000213221	DNLZ	chr9	136359481	136363789	rs11145932:139305686:G:A	136411234	136411234	1	1.15e-15	1.20122	0.14392	-664	Promoter non-eGene eQTLs
ENSG00000273066	RP11-216L13.19	chr9	136799224	136810042	exm799537	136799144	136799144	0	4.27e-06	-0.448087	0.0961149	79	Promoter-eGene eQTLs
ENSG00000244187	TMEM141	chr9	136791356	136793257	rs57277737:139694822:C:T	136800370	136800370	1	2.64e-05	-0.878296	0.206569	-1147	Promoter non-eGene eQTLs
ENSG00000228544	CCDC183-AS1	chr9	136803928	136808848	rs111718739:139743391:AGCGAGGCCTTCGGGCGGTG:A	136848939	136848958	0	1.9e-05	-0.0963197	0.0222511	-215	Promoter non-eGene eQTLs
ENSG00000214402	LCNL1	chr9	136981905	136986410	rs908836:139890453:G:A	136996001	136996001	0	4.42e-18	-8.97446	0.986661	802	Promoter non-eGene eQTLs
ENSG00000197355	UAP1L1	chr9	137077502	137084539	rs10870176:139972900:T:C	137078448	137078448	0	1.11e-13	0.533841	0.0693719	-947	Promoter-eGene eQTLs
ENSG00000188986	NELFB	chr9	137255174	137273547	rs28631372	137253599	137253599	0	6.02e-09	0.749507	0.126077	1574	Promoter-eGene eQTLs
ENSG00000188163	FAM166A	chr9	137243585	137247770	rs28631372	137253599	137253599	0	1.04e-15	-0.602732	0.072088	1574	Promoter non-eGene eQTLs
ENSG00000244187	TMEM141	chr9	136791356	136793257	rs141673459:140302316:T:TG	137407864	137407864	0	3.12e-06	-0.868869	0.183706	15398	Distal non-eGene eQTLs
ENSG00000130653	PNPLA7	chr9	137459954	137550534	rs928046:140487108:T:C	137592656	137592656	0	1.7e-29	2.38535	0.194852	-2166	Promoter non-eGene eQTLs
ENSG00000148399	DPH7	chr9	137554905	137578935	rs77289485:140498628:G:A	137604176	137604176	0	1.3e-07	-3.96741	0.738035	1478	Promoter non-eGene eQTLs
ENSG00000148408	CACNA1B	chr9	137877790	138124624	rs41289997:140773764:C:G	137879312	137879312	0	2.09e-08	-1.69712	0.296705	-1523	Promoter-eGene eQTLs

## Sheet: SE
Gene_ID	Gene_Symbol	chr	Gene_start	Gene_end	snp	hg38_pos_start	hg38_pos_end	Rank	Backward_nom_pval	Backward_slope	Backward_slope_se	TSS-variant_Distance	Type
ENSG00000127054	CPSF3L	chr1	1311586	1324691	rs115464315:1242288:T:G	1306908	1306908	0	7.17e-08	5.47775	0.997907	1659	Promoter non-eGene eQTLs
ENSG00000158109	TPRG1L	chr1	3625003	3630127	rs12757620	3623460	3623460	0	1.24e-23	-0.670252	0.0627051	1542	Promoter-eGene eQTLs
ENSG00000158109	TPRG1L	chr1	3625003	3630127	exm7253	3632268	3632268	1	1.68e-23	-1.42694	0.133946	-7266	Distal eGene eQTLs
ENSG00000116198	CEP104	chr1	3812082	3857214	rs7522227:3748085:A:G	3831521	3831521	0	1.61e-24	-4.86605	0.445176	25693	Distal eGene eQTLs
ENSG00000169598	DFFB	chr1	3857268	3885429	rs34966926:3751728:G:GT	3835164	3835164	1	2.19e-07	0.420251	0.0796812	22103	Distal eGene eQTLs
ENSG00000069424	KCNAB2	chr1	5991467	6101193	rs71568636:6051981:CCAGGGGG:C	5991921	5991928	1	1.78e-06	0.337718	0.0696555	-455	Promoter-eGene eQTLs
ENSG00000270171	RP11-338N10.1	chr1	7693125	7694844	rs77721345:7748009:C:T	7687949	7687949	1	1.8e-09	0.886288	0.143948	6895	Distal eGene eQTLs
ENSG00000270035	RP11-338N10.2	chr1	7698304	7698872	rs17368220:7755729:T:C	7695669	7695669	1	3.84e-05	-0.408956	0.098226	3203	Distal eGene eQTLs
ENSG00000269978	RP11-338N10.3	chr1	7700705	7700970	rs4908680:7757998:T:G	7697938	7697938	0	1.9e-09	1.21568	0.19774	3032	Distal eGene eQTLs
ENSG00000270171	RP11-338N10.1	chr1	7693125	7694844	rs1539181:7761640:T:C	7701580	7701580	0	9.79e-43	0.883639	0.0570591	-6736	Distal eGene eQTLs
ENSG00000270035	RP11-338N10.2	chr1	7698304	7698872	rs34600274:7762140:CAGG:C	7702080	7702083	0	5.13e-15	-0.825038	0.101389	-3208	Distal eGene eQTLs
ENSG00000049245	VAMP3	chr1	7771270	7781432	1:7843711:T:C	7783651	7783651	0	1.31e-17	2.42847	0.271261	-12382	Distal eGene eQTLs
ENSG00000171621	SPSB1	chr1	9292881	9369532	rs76884273:9852271:C:A	9792213	9792213	0	1.86e-10	5.52	0.843877	-11391	Distal non-eGene eQTLs
ENSG00000171603	CLSTN1	chr1	9729027	9824526	rs11121497:9902820:A:G	9842762	9842762	0	1.94e-13	-28.4353	3.73536	-18236	Distal eGene eQTLs
ENSG00000130939	UBE4B	chr1	10032833	10181239	rs11801988:10153153:A:G	10093095	10093095	0	1.41e-06	-4.91084	1.00284	-60263	Distal eGene eQTLs
ENSG00000162444	RBP7	chr1	9997207	10016020	rs34277013:10227032:A:C	10166974	10166974	0	3.01e-06	-0.623243	0.131551	-134142	Distal non-eGene eQTLs
ENSG00000054523	KIF1B	chr1	10210806	10381603	rs71583845:10255824:C:CT	10195766	10195766	0	4.11e-05	23.4845	5.66283	15039	Distal eGene eQTLs
ENSG00000142655	PEX14	chr1	10472289	10630758	rs2506896:10603716:T:C	10543659	10543659	0	2.84e-33	5.51712	0.418085	-71371	Distal eGene eQTLs
ENSG00000142632	ARHGEF19	chr1	16197855	16212609	rs2132851:16537752:C:G	16211257	16211257	0	2.26e-07	0.210625	0.0399816	1352	Promoter-eGene eQTLs
ENSG00000037637	FBXO42	chr1	16246840	16352454	rs35225769:16546514:T:TC	16220019	16220019	0	3.9e-24	-3.87564	0.357985	132435	Distal eGene eQTLs
ENSG00000215908	CROCCP2	chr1	16618970	16644683	rs11584240:17231692:G:A	16905197	16905197	0	2.8e-12	0.586286	0.081309	-421	Promoter non-eGene eQTLs
ENSG00000219481	NBPF1	chr1	16562320	16613562	rs11588350:17231788:C:T	16905293	16905293	0	1.59e-14	-0.767377	0.0961995	-517	Promoter non-eGene eQTLs
ENSG00000238142	RP11-108M9.4	chr1	16888539	16889649	rs11203396:17237828:A:G	16911333	16911333	1	3.68e-10	0.593896	0.0923933	-171060	Distal non-eGene eQTLs
ENSG00000142623	PADI1	chr1	17205127	17246005	rs2143810:17440854:C:A	17114359	17114359	1	3.05e-05	0.310992	0.0737302	-60189	Distal non-eGene eQTLs
ENSG00000117115	PADI2	chr1	17066762	17119435	rs2746482:17465937:A:G	17139442	17139442	0	4.2e-46	-43.4161	2.66707	-20007	Distal eGene eQTLs
ENSG00000189266	PNRC2	chr1	23959110	23963462	rs55899369:24321935:T:G	23995445	23995445	0	1.08e-22	-5.92718	0.568332	-36336	Distal eGene eQTLs
ENSG00000130772	MED18	chr1	28329003	28335967	rs145850575:29536018:CAG:C	29209506	29209508	0	4.14e-05	0.619412	0.149427	14427	Distal non-eGene eQTLs
ENSG00000116514	RNF19B	chr1	32936446	32964685	rs520309:33398256:T:C	32932655	32932655	0	1.72e-39	-0.904518	0.0614753	32030	Distal eGene eQTLs
ENSG00000004455	AK2	chr1	33007941	33080996	1:33456305:CA:C	32990704	32990705	0	4.82e-12	-5.6392	0.791304	-26019	Distal non-eGene eQTLs
ENSG00000116525	TRIM62	chr1	33145403	33182059	rs368589779:33813967:T:C	33348366	33348366	0	1.18e-05	0.803112	0.181005	1986	Promoter non-eGene eQTLs
ENSG00000092847	AGO1	chr1	35869809	35930528	rs72901297:36184589:C:T	35718988	35718988	0	1.25e-11	4.42552	0.634211	484	Promoter non-eGene eQTLs
ENSG00000181817	LSM10	chr1	36391239	36397892	rs79251590:36863697:T:C	36398096	36398096	0	3.16e-07	0.645771	0.124146	-204	Promoter-eGene eQTLs
ENSG00000243970	PPIEL	chr1	39531839	39558707	rs17568616:39682662:A:T	39216990	39216990	0	1.58e-07	-0.366522	0.0686751	-135674	Distal non-eGene eQTLs
ENSG00000131238	PPT1	chr1	40072706	40097703	rs3131656:40548690:G:A	40083018	40083018	0	6.82e-17	-6.35812	0.728113	14685	Distal eGene eQTLs
ENSG00000227533	SLC2A1-AS1	chr1	42959050	42983358	rs17387775	42950462	42950462	0	5.11e-49	1.16496	0.0686954	8587	Distal eGene eQTLs
ENSG00000229444	RP11-184I16.4	chr1	43709393	43727343	rs76760124:44186396:A:G	43720725	43720725	1	2.87e-08	-0.829198	0.146475	6618	Distal eGene eQTLs
ENSG00000229444	RP11-184I16.4	chr1	43709393	43727343	rs12122504:44256819:C:G	43791148	43791148	0	5.4e-09	-0.407818	0.0683769	-85324	Distal non-eGene eQTLs
ENSG00000126091	ST3GAL3	chr1	43705825	43931165	rs3791058:44270310:T:C	43804639	43804639	0	8.53e-08	0.376761	0.0690499	-98815	Distal eGene eQTLs
ENSG00000162383	SLC1A7	chr1	53087180	53142632	rs1769299:53585723:G:T	53120051	53120051	1	1.26e-08	-0.396604	0.0682344	22581	Distal eGene eQTLs
ENSG00000121310	ECHDC2	chr1	52895911	52927212	rs6667002:53593925:T:C	53128253	53128253	1	4.39e-05	-0.402411	0.0973987	-13677	Distal non-eGene eQTLs
ENSG00000116221	MRPL37	chr1	54184042	54225464	rs642990	54222843	54222843	0	8.44e-08	-0.704948	0.129152	-38802	Distal eGene eQTLs
ENSG00000116212	LRRC42	chr1	53946078	53968168	rs6704316:54757151:C:T	54291478	54291478	0	4.64e-05	0.816467	0.198269	-107437	Distal non-eGene eQTLs
ENSG00000116675	DNAJC6	chr1	65248220	65415869	rs942861:65798843:G:A	65333160	65333160	0	5.23e-19	8.96995	0.956997	-84941	Distal eGene eQTLs
ENSG00000180869	LINC01555	chr1	84628231	84635020	rs143327345:85142363:C:CAGG	84676680	84676680	0	7.6e-11	0.445293	0.0665765	14123	Distal non-eGene eQTLs
ENSG00000261737	RP4-612B15.3	chr1	86703503	86704462	rs3834007:87169592:TAAG:T	86703909	86703912	0	1.57e-11	-0.183662	0.0264599	553	Promoter-eGene eQTLs
ENSG00000137962	ARHGAP29	chr1	94148989	94275068	rs5776202:94550715:G:A	94085159	94085159	0	1.25e-08	0.460514	0.0792233	189909	Distal eGene eQTLs
ENSG00000198691	ABCA4	chr1	93992836	94121132	rs3827713:94576524:G:C	94110968	94110968	0	9.77e-09	0.394057	0.0672667	10164	Distal eGene eQTLs
ENSG00000134207	SYT6	chr1	114089292	114153919	rs12729894:114481962:T:G	113939340	113939340	0	2.67e-05	-0.592213	0.139374	-10148	Distal non-eGene eQTLs
ENSG00000233396	RP11-458D21.1	chr1	146052567	146061948	rs3811446:145471996:C:G	145963094	145963094	2	0.000134474	0.505384	0.131081	-1706	Promoter non-eGene eQTLs
ENSG00000183853	KIRREL	chr1	157993274	158100262	rs1972216	158030950	158030950	1	5.68e-09	-0.627914	0.105441	-37677	Distal eGene eQTLs
ENSG00000183853	KIRREL	chr1	157993274	158100262	rs66716637:158026348:C:T	158056558	158056558	0	2.2e-10	1.08504	0.166578	-63285	Distal eGene eQTLs
ENSG00000085552	IGSF9	chr1	159927040	159945604	rs10752634:159905268:T:C	159935478	159935478	0	4.67e-11	14.9774	2.21316	10126	Distal eGene eQTLs
ENSG00000122218	COPA	chr1	160289274	160343400	rs4656892:160220213:A:G	160250423	160250423	0	3.29e-15	5.46271	0.666197	11321	Distal non-eGene eQTLs
ENSG00000143190	POU2F1	chr1	167220830	167427345	rs10918673:167235524:C:T	167266287	167266287	0	2.52e-06	-5.19614	1.08814	-45458	Distal eGene eQTLs
ENSG00000254154	RP4-798P15.3	chr1	177928789	178038007	rs16828594:177929379:C:T	177960244	177960244	1	1.59e-13	0.743182	0.0972443	77763	Distal eGene eQTLs
ENSG00000120341	SEC16B	chr1	177923957	177984303	rs6682862	177969302	177969302	0	7.45e-18	2.71887	0.301185	15001	Distal eGene eQTLs
ENSG00000254154	RP4-798P15.3	chr1	177928789	178038007	rs79371453:177966389:C:T	177997254	177997254	0	1.37e-12	1.02865	0.140536	40753	Distal eGene eQTLs
ENSG00000254154	RP4-798P15.3	chr1	177928789	178038007	rs10913487:177968239:C:G	177999104	177999104	2	7.68e-06	0.55364	0.122132	38903	Distal eGene eQTLs
ENSG00000242193	RP11-568K15.1	chr1	178006137	178037950	rs12565045:177972973:G:A	178003838	178003838	0	9.23e-13	-0.678195	0.0919007	-19535	Distal non-eGene eQTLs
ENSG00000135835	KIAA1614	chr1	180913155	180951614	rs12026811:180935975:G:A	180966839	180966839	0	3.16e-05	-5.06398	1.20291	-53685	Distal eGene eQTLs
ENSG00000116703	PDC	chr1	186443567	186461122	rs138592085:186437836:T:TTACTC	186468704	186468704	0	1.13e-18	63.027	6.79688	-7582	Distal eGene eQTLs
ENSG00000081277	PKP1	chr1	201283453	201332993	rs57522319:201235069:A:C	201265941	201265941	1	3.29e-16	0.751188	0.0881774	17511	Distal eGene eQTLs
ENSG00000081277	PKP1	chr1	201283453	201332993	rs56287879:201237953:C:A	201268825	201268825	0	3.73e-33	-1.16892	0.088779	14627	Distal eGene eQTLs
ENSG00000170075	GPR37L1	chr1	202122859	202133592	rs11588918:202095560:G:A	202126432	202126432	1	4.56e-06	0.364146	0.0783497	-3574	Distal eGene eQTLs
ENSG00000117139	KDM5B	chr1	202724492	202809470	rs12132992:202761823:C:G	202792695	202792695	1	4.12e-08	-0.439787	0.0786208	16775	Distal eGene eQTLs
ENSG00000184774	MGAT4EP	chr1	202820267	202827225	rs4950923:202776448:G:A	202807320	202807320	0	1.42e-17	-0.620072	0.0693404	2150	Promoter non-eGene eQTLs
ENSG00000228288	PCAT6	chr1	202810955	202812156	rs2275895	202811402	202811402	0	1.19e-28	-0.908421	0.0755465	-448	Promoter-eGene eQTLs
ENSG00000159348	CYB5R1	chr1	202961870	202967280	rs11380528:202933552:T:TA	202964424	202964424	0	2.39e-05	-2.82373	0.660575	2856	Distal eGene eQTLs
ENSG00000117222	RBBP5	chr1	205086143	205122015	rs35603588:204315882:C:CT	204346754	204346754	0	1.18e-05	-1.06079	0.239047	504	Promoter non-eGene eQTLs
ENSG00000224717	RP11-576D8.4	chr1	205455930	205469024	rs2759282:204846772:C:T	204877644	204877644	0	5.68e-05	0.27214	0.0668756	-48993	Distal non-eGene eQTLs
ENSG00000133069	TMCC2	chr1	205228177	205273343	rs1172113:205226288:T:C	205257160	205257160	0	2.83e-14	-3.67004	0.46494	-28984	Distal eGene eQTLs
ENSG00000162889	MAPKAPK2	chr1	206684945	206734283	rs55730781:206895361:G:T	206722016	206722016	0	2.09e-08	1.78066	0.311336	-37072	Distal eGene eQTLs
ENSG00000198570	RD3	chr1	211476523	211492917	rs367700286:211662675:TTTC:T	211489333	211489336	0	1.72e-09	11.804	1.91463	3584	Distal eGene eQTLs
ENSG00000223649	RP11-359E8.3	chr1	211492256	211492917	rs10863899	211492876	211492876	0	5.18e-16	0.184037	0.0217621	-621	Promoter-eGene eQTLs
ENSG00000123684	LPGAT1	chr1	211743458	211830772	rs145922850:211932640:GT:G	211759298	211759299	0	7.29e-07	-9.80244	1.94748	71474	Distal eGene eQTLs
ENSG00000162909	CAPN2	chr1	223701594	223776018	rs11810318:223974310:A:G	223786608	223786608	2	7.71e-06	-0.326949	0.0721364	59364	Distal non-eGene eQTLs
ENSG00000188460	ACTBP11	chr1	223863727	223864851	rs10915946:224074598:T:C	223886896	223886896	0	1.91e-07	-0.350978	0.0662111	-22045	Distal eGene eQTLs
ENSG00000135744	AGT	chr1	230702524	230714297	rs1977414:230852551:C:T	230716805	230716805	0	5.63e-08	3.28698	0.593834	-2508	Distal eGene eQTLs
ENSG00000010072	SPRTN	chr1	231337105	231355023	rs34584064:231509427:T:C	231373681	231373681	0	8.47e-07	-0.572578	0.114453	-36577	Distal eGene eQTLs
ENSG00000135766	EGLN1	chr1	231363752	231425044	1:231558054:G:C	231422308	231422308	0	4.08e-07	-18.574	3.60621	2736	Distal eGene eQTLs
ENSG00000116991	SIPA1L2	chr1	232397966	232561558	rs4649387:232715788:A:G	232580042	232580042	1	2.29e-05	0.386243	0.0901391	-18484	Distal eGene eQTLs
ENSG00000231768	LINC01354	chr1	234527892	234531779	rs271738:234662890:G:A	234527144	234527144	0	7e-17	-0.500283	0.0573131	4635	Distal eGene eQTLs
ENSG00000232656	IDI2-AS1	chr10	1022667	1044201	rs11250244:1102710:C:A	1056770	1056770	0	2.97e-25	0.748286	0.0672368	-34104	Distal eGene eQTLs
ENSG00000232656	IDI2-AS1	chr10	1022667	1044201	rs34689634:1107778:C:CA	1061838	1061838	1	6.87e-06	-0.341943	0.0750213	-39172	Distal eGene eQTLs
ENSG00000067057	PFKP	chr10	3066334	3137712	rs56285785:3113637:T:TG	3071445	3071445	1	1.71e-08	-0.473014	0.0821704	-5112	Distal eGene eQTLs
ENSG00000107959	PITRM1	chr10	3137729	3172841	rs10903953:3114654:T:C	3072462	3072462	3	9.55e-06	0.35442	0.0790297	-6461	Distal non-eGene eQTLs
ENSG00000237399	PITRM1-AS1	chr10	3141633	3167972	rs12762657:3166833:G:A	3124641	3124641	1	2.36e-10	1.0449	0.160699	-58308	Distal non-eGene eQTLs
ENSG00000148484	RSU1	chr10	16590612	16817528	rs10732931	16721883	16721883	0	4.42e-12	-0.463725	0.0649479	95645	Distal eGene eQTLs
ENSG00000225213	RP11-197M22.2	chr10	16721353	16748377	rs4748314:16767367:C:T	16725368	16725368	1	6.51e-11	0.441356	0.0657421	23009	Distal eGene eQTLs
ENSG00000225213	RP11-197M22.2	chr10	16721353	16748377	rs11254169	16748232	16748232	0	4.21e-12	-0.777967	0.108849	145	Promoter-eGene eQTLs
ENSG00000148484	RSU1	chr10	16590612	16817528	rs11254169	16748232	16748232	1	5.18e-06	-0.520289	0.112616	69296	Distal eGene eQTLs
ENSG00000165995	CACNB2	chr10	18140678	18541869	rs4443967:18581361:C:T	18292432	18292432	0	3.98e-19	0.679928	0.0722715	-151755	Distal eGene eQTLs
ENSG00000165997	ARL5B	chr10	18659406	18681639	rs77952637:18597112:C:T	18308183	18308183	0	1.72e-05	1.57274	0.361402	-167506	Distal non-eGene eQTLs
ENSG00000136738	STAM	chr10	17644126	17715914	rs11386791:18698231:G:GA	18409302	18409302	0	3.51e-05	0.743898	0.177753	-268625	Distal non-eGene eQTLs
ENSG00000120594	PLXDC2	chr10	19816240	20289856	rs6482066:20131614:G:C	19842685	19842685	0	3.96e-51	25.7062	1.47333	-26446	Distal eGene eQTLs
ENSG00000165322	ARHGAP12	chr10	31805405	31928876	rs144466157:32216157:A:AATTTTAAAACAAAG	31927229	31927229	0	1.64e-74	-11.6313	0.509529	1647	Promoter-eGene eQTLs
ENSG00000165512	ZNF22	chr10	45000476	45005326	rs3758402:45475917:C:T	44980469	44980469	0	5.41e-06	-0.992788	0.215325	-1659	Promoter non-eGene eQTLs
ENSG00000198964	SGMS1	chr10	50305587	50625163	rs10508930:52338100:A:G	50578340	50578340	0	3.1e-51	9.3822	0.536974	46823	Distal eGene eQTLs
ENSG00000226200	SGMS1-AS1	chr10	50624952	50641451	rs56138205:52384362:G:C	50624602	50624602	0	2.29e-09	-1.39058	0.22739	349	Promoter-eGene eQTLs
ENSG00000108091	CCDC6	chr10	59788764	59906656	rs3793865:61663377:T:C	59903619	59903619	0	1.83e-08	6.17549	1.07508	3037	Distal eGene eQTLs
ENSG00000096746	HNRNPH3	chr10	68331175	68343191	rs71470514:70097502:T:TTTTTG	68337745	68337745	0	1.07e-05	-6.116	1.37145	-6571	Distal eGene eQTLs
ENSG00000156515	HK1	chr10	69269985	69401882	rs61869987:71076335:G:A	69316579	69316579	0	4.91e-08	-22.8529	4.10945	-46595	Distal eGene eQTLs
ENSG00000197746	PSAP	chr10	71816299	71851375	rs74673782:73613167:G:A	71853410	71853410	0	1.11e-26	86.349	7.50277	-2035	Promoter-eGene eQTLs
ENSG00000148719	DNAJB12	chr10	72332831	72355230	rs9416017:74100279:T:C	72340521	72340521	0	6.52e-07	-1.05456	0.208569	14709	Distal eGene eQTLs
ENSG00000224596	ZMIZ1-AS1	chr10	78943329	79067895	rs12412430:80831898:A:G	79072141	79072141	0	1.3e-12	0.999566	0.136409	-4246	Distal eGene eQTLs
ENSG00000148602	LRIT1	chr10	84231594	84241461	rs4615966:85997810:C:T	84238054	84238054	0	4.25e-08	1.91491	0.342679	3407	Distal eGene eQTLs
ENSG00000148604	RGR	chr10	84245054	84259960	rs10736319:86004238:T:C	84244482	84244482	0	1.34e-35	0.758037	0.0550496	571	Promoter-eGene eQTLs
ENSG00000234043	RP11-56M3.1	chr10	91152606	91153349	rs61857950:92921360:A:G	91161603	91161603	0	7.96e-06	-0.261949	0.057887	1409	Promoter non-eGene eQTLs
ENSG00000187553	CYP26C1	chr10	93060809	93069536	rs860668:94750745:G:A	92990988	92990988	0	6.74e-23	-0.309008	0.0294683	69820	Distal eGene eQTLs
ENSG00000138190	EXOC6	chr10	92834714	93059493	rs74994889:94750883:CT:C	92991126	92991127	0	1.62e-15	-0.55102	0.066394	-156413	Distal eGene eQTLs
ENSG00000107864	CPEB3	chr10	92046693	92291087	rs7905501:94840716:C:T	93080959	93080959	0	4.58e-05	-1.33488	0.323911	-246246	Distal non-eGene eQTLs
ENSG00000165879	FRAT1	chr10	97319268	97321915	rs3832695:99080246:CT:C	97320489	97320490	0	3.58e-06	-0.534431	0.113707	-1222	Promoter-eGene eQTLs
ENSG00000227695	DNMBP-AS1	chr10	99927011	99958381	rs374217424:101683518:TCTC:T	99923761	99923764	0	4.16e-06	-0.18533	0.0397058	3249	Distal eGene eQTLs
ENSG00000023839	ABCC2	chr10	99782733	99852192	rs7077718:101689378:G:C	99929621	99929621	0	2.58e-06	-1.56636	0.32833	-2611	Distal non-eGene eQTLs
ENSG00000138175	ARL3	chr10	102673732	102714407	rs2778036:104485725:G:A	102725968	102725968	0	4.28e-06	-6.40436	1.37394	-11561	Distal eGene eQTLs
ENSG00000107954	NEURL1	chr10	103493980	103592552	rs7067666	103572695	103572695	1	7.57e-07	0.344738	0.0685932	-78716	Distal eGene eQTLs
ENSG00000148700	ADD3	chr10	109996369	110135565	rs59339754:111800116:C:T	110040358	110040358	0	8.22e-15	20.8197	2.5797	-43990	Distal eGene eQTLs
ENSG00000203876	ADD3-AS1	chr10	109940105	110008381	rs11194963:111806469:C:A	110046711	110046711	0	3.47e-07	1.18175	0.227999	-38330	Distal eGene eQTLs
ENSG00000099204	ABLIM1	chr10	114431114	114685003	rs7904491:116387668:T:A	114627909	114627909	0	1.13e-09	23.4287	3.7564	57094	Distal eGene eQTLs
ENSG00000165650	PDZD8	chr10	117277275	117375467	rs2255385:119104993:G:T	117345482	117345482	1	9.59e-06	0.59817	0.133414	29985	Distal eGene eQTLs
ENSG00000166033	HTRA1	chr10	122461526	122514908	rs4991294:124238188:T:G	122478672	122478672	0	1.44e-18	0.600723	0.0650019	-17147	Distal eGene eQTLs
ENSG00000166033	HTRA1	chr10	122461526	122514908	rs5788561:124243660:CA:C	122484144	122484145	1	6.83e-16	-1.08334	0.128686	-22619	Distal eGene eQTLs
ENSG00000203791	METTL10	chr10	124748150	124791870	rs7476729:126428174:C:G	124739605	124739605	0	1.16e-21	-0.704056	0.0694304	-116252	Distal non-eGene eQTLs
ENSG00000189319	FAM53B	chr10	124619293	124744269	rs750689:126693480:G:A	125004911	125004911	0	1.14e-05	2.10398	0.473334	-8847	Distal non-eGene eQTLs
ENSG00000174672	BRSK2	chr11	1389900	1462689	rs7107140:1434136:G:A	1412906	1412906	0	2.71e-08	0.469832	0.0828415	-23007	Distal eGene eQTLs
ENSG00000255420	CASC23	chr11	8011279	8016489	rs34812123:8053407:G:A	8031860	8031860	0	7.13e-06	0.311127	0.0683824	-15371	Distal eGene eQTLs
ENSG00000166402	TUB	chr11	8019245	8106112	rs7932687:8088757:C:A	8067210	8067210	1	2.61e-05	-0.29691	0.069781	-47966	Distal eGene eQTLs
ENSG00000133794	ARNTL	chr11	13276653	13387266	rs72867447:13301875:C:G	13280328	13280328	0	4.28e-05	-1.69054	0.40861	-3676	Distal eGene eQTLs
ENSG00000184669	OR7E14P	chr11	17013999	17053024	rs4757467:17001584:T:C	16980037	16980037	1	1.03e-06	-0.339207	0.0683515	33961	Distal eGene eQTLs
ENSG00000110700	RPS13	chr11	17074390	17077787	rs61147221:17004018:C:T	16982471	16982471	0	9.39e-09	1.66497	0.283873	-7458	Distal non-eGene eQTLs
ENSG00000166689	PLEKHA7	chr11	16777318	17014443	rs35949484:17013622:A:AC	16992075	16992075	0	7.51e-07	2.11946	0.421582	22368	Distal eGene eQTLs
ENSG00000255542	RP4-683L5.1	chr11	35419058	35421002	rs112697411:35428186:G:GA	35406639	35406639	0	7.13e-06	0.225336	0.0495283	12418	Distal eGene eQTLs
ENSG00000110436	SLC1A2	chr11	35251207	35420063	rs675227:35456453:G:C	35434905	35434905	0	1.78e-10	-21.4566	3.2763	-14842	Distal eGene eQTLs
ENSG00000175220	ARHGAP1	chr11	46677081	46700615	rs12274785:46714279:T:C	46692729	46692729	0	2.06e-13	-2.1139	0.277989	7886	Distal eGene eQTLs
ENSG00000134569	LRP4	chr11	46856869	46918642	rs146952358:46926058:A:G	46904507	46904507	0	2.97e-06	6.84084	1.44319	14135	Distal eGene eQTLs
ENSG00000110514	MADD	chr11	47269162	47330031	rs10501320	47272248	47272248	3	9.57e-06	-0.349904	0.0780296	-3087	Distal eGene eQTLs
ENSG00000110514	MADD	chr11	47269162	47330031	exm904813	47285079	47285079	0	1.42e-13	-1.03871	0.135614	-15918	Distal eGene eQTLs
ENSG00000134575	ACP2	chr11	47239303	47248906	rs113012334:47316568:G:GT	47295017	47295017	0	2.84e-06	-0.857156	0.180463	-46717	Distal non-eGene eQTLs
ENSG00000110048	OSBP	chr11	59574399	59616144	rs505431:59532072:T:C	59764599	59764599	0	7.87e-06	1.86107	0.411032	-9624	Distal non-eGene eQTLs
ENSG00000257052	RP11-881M11.2	chr11	60906790	60909742	11:60686070:C:CT	60918598	60918598	0	7.86e-05	-0.134901	0.0338101	-4724	Distal non-eGene eQTLs
ENSG00000110107	PRPF19	chr11	60890731	60906588	rs34085615:60903633:AT:A	61136161	61136162	0	2.38e-06	-1.96414	0.41029	-33766	Distal non-eGene eQTLs
ENSG00000006118	TMEM132A	chr11	60924464	60937159	exm915612	61138807	61138807	1	8.88e-07	-0.674697	0.135126	-36412	Distal non-eGene eQTLs
ENSG00000167987	VPS37C	chr11	61130257	61161617	rs74555568:60907886:C:T	61140414	61140414	1	3.84e-13	0.786535	0.104712	21203	Distal eGene eQTLs
ENSG00000279549	AP000437.3	chr11	61143381	61145464	rs74483081:60913290:G:C	61145818	61145818	0	3.96e-07	0.257961	0.0500239	-354	Promoter-eGene eQTLs
ENSG00000167987	VPS37C	chr11	61130257	61161617	rs519296	61152282	61152282	0	4.02e-51	0.996353	0.0571101	9335	Distal eGene eQTLs
ENSG00000110108	TMEM109	chr11	60913875	60923443	rs60905595:60924896:C:A	61157424	61157424	0	3.7e-05	-0.914764	0.219248	-55029	Distal non-eGene eQTLs
ENSG00000110448	CD5	chr11	61102396	61127852	rs483398:60924920:T:C	61157448	61157448	0	1.71e-07	-0.483309	0.0908144	-55053	Distal eGene eQTLs
ENSG00000167995	BEST1	chr11	61949822	61965515	rs972355:61717337:G:C	61949865	61949865	0	7.64e-42	-7.92093	0.518561	-44	Promoter-eGene eQTLs
ENSG00000255553	RP11-810P12.5	chr11	62077278	62082184	rs35435184:61840165:C:T	62072693	62072693	0	1.71e-12	-2.51913	0.345735	9491	Distal eGene eQTLs
ENSG00000245532	NEAT1	chr11	65422775	65445540	rs674485	65429922	65429922	0	8.75e-22	-68.7926	6.76109	-7148	Distal eGene eQTLs
ENSG00000172803	SNX32	chr11	65833642	65856896	NHGRI_notinECorHUNT_chr11_65656564	65889093	65889093	0	1.52e-33	0.859708	0.0648165	231975	Distal non-eGene eQTLs
ENSG00000172613	RAD9A	chr11	67317872	67398410	11:66913469:G:GT	67145998	67145998	0	5.46e-18	1.6854	0.185864	-26729	Distal non-eGene eQTLs
ENSG00000137496	IL18BP	chr11	71998542	72005715	exm938090	72014588	72014588	0	3.4e-11	-2.06876	0.303403	-16047	Distal eGene eQTLs
ENSG00000251143	RP11-849H4.4	chr11	72014292	72020910	exm938090	72014588	72014588	1	1.09e-05	-1.39374	0.312861	-297	Promoter-eGene eQTLs
ENSG00000251143	RP11-849H4.4	chr11	72014292	72020910	rs7115200:71752160:T:G	72041114	72041114	0	7.95e-08	-0.387191	0.0707899	-26823	Distal eGene eQTLs
ENSG00000021300	PLEKHB1	chr11	73646179	73662819	rs11235826:73342259:G:A	73631214	73631214	0	8.84e-15	-61.3096	7.60643	14964	Distal eGene eQTLs
ENSG00000054965	FAM168A	chr11	73400488	73598189	Ancestry_CHINESE_Cluster280_chr11_73366697	73655652	73655652	0	1.04e-20	0.629025	0.0637346	273782	Distal non-eGene eQTLs
ENSG00000175567	UCP2	chr11	73974668	73983307	rs11235841:73367122:T:C	73656077	73656077	1	8.43e-10	0.589781	0.0938002	-15598	Distal non-eGene eQTLs
ENSG00000171533	MAP6	chr11	75586919	75669120	rs1145696:75326736:G:C	75615691	75615691	0	6.35e-12	-0.662452	0.0935211	53429	Distal eGene eQTLs
ENSG00000255135	RP11-111M22.3	chr11	76441339	76444656	rs73002555:76082062:A:G	76371018	76371018	0	1.34e-16	-1.72639	0.199782	9953	Distal non-eGene eQTLs
ENSG00000137474	MYO7A	chr11	77128265	77215239	rs10793236:76819821:T:C	77108775	77108775	2	1.25e-10	-0.460592	0.0697186	19489	Distal eGene eQTLs
ENSG00000149260	CAPN5	chr11	77066933	77126155	rs4945143:76820429:A:C	77109383	77109383	0	3.64e-11	-0.472736	0.0694445	-42451	Distal eGene eQTLs
ENSG00000137474	MYO7A	chr11	77128265	77215239	rs113813737:76843513:T:TTTTG	77132467	77132467	0	3.55e-15	1.38241	0.168811	-4203	Distal eGene eQTLs
ENSG00000165895	ARHGAP42	chr11	100687654	100991937	rs79903058:100582138:T:A	100711407	100711407	0	3.35e-05	6.64733	1.58428	-23754	Distal eGene eQTLs
ENSG00000170647	TMEM133	chr11	100991990	100993941	rs79903058:100582138:T:A	100711407	100711407	1	2.48e-05	0.562807	0.131918	-44948	Distal non-eGene eQTLs
ENSG00000248027	CTD-2383M3.1	chr11	100684163	100687955	rs11224426	100744892	100744892	0	5.09e-15	0.565946	0.0695386	-56937	Distal eGene eQTLs
ENSG00000260254	AP000997.2	chr11	115638564	115646962	rs113932007:115491436:A:AT	115620718	115620718	0	1.08e-09	-38.2754	6.12917	17845	Distal eGene eQTLs
ENSG00000255599	AP000997.1	chr11	115628066	115629743	rs11215638:115495692:C:T	115624974	115624974	0	3.43e-06	-0.60068	0.127558	3091	Distal eGene eQTLs
ENSG00000109917	ZPR1	chr11	116773800	116788050	rs140489004:117496924:CTCCT:C	117626209	117626213	1	2.08e-05	-0.328496	0.0762667	-14192	Distal non-eGene eQTLs
ENSG00000172269	DPAGT1	chr11	119096504	119108331	rs1064193:118965338:T:A	119094628	119094628	0	4.29e-07	-0.758099	0.147478	839	Promoter non-eGene eQTLs
ENSG00000172375	C2CD2L	chr11	119102199	119118544	rs668033:119023107:A:C	119152397	119152397	0	7.32e-13	-2.48831	0.335592	-3385	Distal non-eGene eQTLs
ENSG00000110400	NECTIN1	chr11	119623409	119729084	rs715849:119575724:A:G	119705014	119705014	1	1.37e-06	-0.360703	0.073565	24070	Distal eGene eQTLs
ENSG00000196914	ARHGEF12	chr11	120336915	120489936	rs73008718:120205856:T:C	120335147	120335147	0	3.12e-06	6.52824	1.38033	1767	Promoter-eGene eQTLs
ENSG00000023171	GRAMD1B	chr11	123358429	123627774	rs2846310:123397869:G:A	123527161	123527161	0	1.01e-12	-0.552652	0.0750354	-168733	Distal eGene eQTLs
ENSG00000182667	NTM	chr11	131370479	132336822	rs10791142:131245391:A:T	131375496	131375496	0	9.89e-13	-6.64873	0.902235	-5018	Distal eGene eQTLs
ENSG00000254648	RP11-713P17.4	chr11	134035833	134037107	rs879601:133907345:G:T	134037450	134037450	0	1.13e-06	-0.258604	0.0523175	-343	Promoter-eGene eQTLs
ENSG00000151503	NCAPD3	chr11	134150120	134225454	rs470631:133989665:T:A	134119770	134119770	0	1.8e-06	-0.420663	0.0868036	-50845	Distal non-eGene eQTLs
ENSG00000047617	ANO2	chr12	5531870	5946232	rs12371081:6042669:T:C	5933503	5933503	0	3.28e-15	-55.5152	6.76987	12729	Distal eGene eQTLs
ENSG00000110811	P3H3	chr12	6828411	6839851	rs4963510:6946545:C:A	6837381	6837381	0	8.45e-22	-3.59741	0.353412	-8971	Distal eGene eQTLs
ENSG00000111674	ENO2	chr12	6913746	6923698	rs76214301:6955865:C:CCACA	6846701	6846701	1	1.84e-06	-0.354349	0.0731916	-18291	Distal non-eGene eQTLs
ENSG00000134539	KLRD1	chr12	10226059	10329600	rs4326887:10375888:T:G	10223289	10223289	0	5.65e-49	-2.01026	0.118612	2769	Distal eGene eQTLs
ENSG00000060138	YBX3	chr12	10699090	10723312	rs12423741:10872827:A:G	10720228	10720228	2	3.72e-06	0.591623	0.126096	3084	Distal eGene eQTLs
ENSG00000151490	PTPRO	chr12	15322398	15597399	rs7308681:14523674:A:G	14370740	14370740	1	4.9e-05	-0.49888	0.121531	-5237	Distal non-eGene eQTLs
ENSG00000139132	FGD4	chr12	32399530	32646050	rs200097919:32576795:GT:G	32423861	32423862	1	9.97e-06	-0.357951	0.0799891	-24332	Distal eGene eQTLs
ENSG00000269514	RP11-370I10.12	chr12	48198388	48202031	rs4760696:48591976:C:A	48198193	48198193	1	5.31e-05	0.286067	0.0700181	194	Promoter-eGene eQTLs
ENSG00000184271	POU6F1	chr12	51186937	51217708	rs6580801:51569463:G:A	51175680	51175680	0	2.12e-08	-0.425907	0.0745025	42028	Distal eGene eQTLs
ENSG00000135457	TFCP2	chr12	51093664	51173134	rs7399089:51575066:T:A	51181283	51181283	0	1.1e-07	-2.61128	0.482864	-8149	Distal eGene eQTLs
ENSG00000258056	RP11-644F5.11	chr12	55729105	55730852	rs71081341:56678681:CA:C	56284897	56284898	0	2.4e-05	-0.459712	0.107558	15245	Distal non-eGene eQTLs
ENSG00000166881	NEMP1	chr12	57055644	57088063	rs62621200:57472544:C:T	57078761	57078761	0	1.44e-42	16.4841	1.06718	9302	Distal eGene eQTLs
ENSG00000270344	RP11-734K2.4	chr12	89525655	89548005	rs2681489:90022066:C:A	89628289	89628289	0	5.4e-06	0.740659	0.160627	80670	Distal non-eGene eQTLs
ENSG00000271614	LINC00936	chr12	89708960	89712590	rs11105379:90095173:T:C	89701396	89701396	0	8.81e-05	0.644529	0.162695	7563	Distal eGene eQTLs
ENSG00000180263	FGD6	chr12	95076750	95217482	rs61937946:95601165:G:A	95207389	95207389	0	2.59e-05	-1.13557	0.266769	10093	Distal eGene eQTLs
ENSG00000111727	HCFC2	chr12	104064458	104106524	rs34577019:104539301:CT:C	104145523	104145524	0	2.94e-06	1.44009	0.303653	-20287	Distal non-eGene eQTLs
ENSG00000139428	MMAB	chr12	109553738	109573874	rs11609896	109600649	109600649	0	2.59e-14	-0.936767	0.118482	-27394	Distal non-eGene eQTLs
ENSG00000089022	MAPKAPK5	chr12	111841979	111902238	rs61309313:112544195:T:TA	112106391	112106391	0	3.32e-25	-5.41332	0.486986	2631	Distal non-eGene eQTLs
ENSG00000258102	MAP1LC3B2	chr12	116548106	116576448	rs112608219:116602950:A:G	116165145	116165145	0	3.29e-05	0.409383	0.0974775	-16491	Distal non-eGene eQTLs
ENSG00000176834	VSIG10	chr12	118063594	118136026	rs200606908:118645134:GA:G	118207329	118207330	0	3.19e-05	0.97993	0.232892	165616	Distal non-eGene eQTLs
ENSG00000089220	PEBP1	chr12	118135859	118145584	rs138948268:118652551:CTT:C	118214746	118214748	0	8.16e-15	-11.9419	1.4795	158199	Distal non-eGene eQTLs
ENSG00000275759	RP11-131L12.3	chr12	118428282	118428870	12:118722814:T:TA	118285009	118285009	1	8.92e-06	-0.456538	0.101457	87936	Distal non-eGene eQTLs
ENSG00000111707	SUDS3	chr12	118376381	118418031	rs17512644:118797768:G:A	118359963	118359963	0	3.12e-19	4.06483	0.430638	16417	Distal eGene eQTLs
ENSG00000277283	RP1-267D11.6	chr12	120116908	120119000	rs10732609:120543406:G:A	120105602	120105602	0	6.17e-11	-0.558294	0.083051	11305	Distal eGene eQTLs
ENSG00000157782	CABP1	chr12	120640553	120667324	rs526940:121142042:T:C	120704239	120704239	0	2.35e-07	1.6738	0.31823	-372	Promoter non-eGene eQTLs
ENSG00000122971	ACADS	chr12	120725736	120740008	rs10610658:121144245:TA:T	120706442	120706443	0	1.27e-08	0.183113	0.0315158	-19573	Distal non-eGene eQTLs
ENSG00000139725	RHOF	chr12	121777755	121803403	rs1168663:122234089:T:A	121796183	121796183	0	3.95e-14	0.814172	0.103772	7220	Distal eGene eQTLs
ENSG00000150967	ABCB9	chr12	122920952	122981649	rs59131741:123536456:C:CT	123051909	123051909	0	2.34e-06	-0.51969	0.108476	29475	Distal non-eGene eQTLs
ENSG00000051825	MPHOSPH9	chr12	123152321	123244014	rs1727294:123616514:A:G	123131967	123131967	0	5.88e-52	-6.37884	0.361627	112047	Distal eGene eQTLs
ENSG00000196498	NCOR2	chr12	124324416	124567589	rs906304:124926143:G:A	124441597	124441597	1	6.7e-06	-0.479504	0.105079	125992	Distal eGene eQTLs
ENSG00000250091	DNAH10OS	chr12	123926425	123934984	rs4765151:124982862:G:T	124498316	124498316	1	1.55e-05	-0.46916	0.107234	-114935	Distal non-eGene eQTLs
ENSG00000184992	BRI3BP	chr12	124993701	125031231	rs77221579:125315206:G:T	124830660	124830660	0	3.76e-06	5.24685	1.11883	52008	Distal non-eGene eQTLs
ENSG00000279500	RP11-21K12.2	chr12	128813187	128814750	rs4760533:129297651:C:T	128813106	128813106	0	1.2e-09	-0.4221	0.067779	1644	Promoter-eGene eQTLs
ENSG00000060709	RIMBP2	chr12	130396138	130517917	rs750047:131121494:C:T	130636949	130636949	0	4.14e-07	-3.08102	0.598526	14422	Distal non-eGene eQTLs
ENSG00000256783	RP11-503G7.1	chr12	132457161	132460024	rs60784430:133030868:C:G	132454282	132454282	0	2.14e-21	2.01241	0.199945	2878	Distal eGene eQTLs
ENSG00000256875	RP11-503G7.2	chr12	132462243	132462856	rs11147042:133036863:C:T	132460277	132460277	1	1.21e-05	0.348008	0.0785378	1965	Promoter-eGene eQTLs
ENSG00000256875	RP11-503G7.2	chr12	132462243	132462856	exm-rs10747083	132465032	132465032	0	5.55e-24	-0.751802	0.0697104	-2790	Distal eGene eQTLs
ENSG00000274373	RP13-714J12.1	chr12	132424505	132425208	rs12309362:133043033:G:A	132466447	132466447	1	4.5e-06	-0.358567	0.0771	-9287	Distal non-eGene eQTLs
ENSG00000090615	GOLGA3	chr12	132768910	132828858	rs61952781:133412428:A:G	132835842	132835842	0	1.29e-22	-31.2198	2.9996	-6984	Distal eGene eQTLs
ENSG00000072609	CHFR	chr12	132822188	132956304	rs61952781:133412428:A:G	132835842	132835842	0	2.13e-10	0.562763	0.086331	120462	Distal eGene eQTLs
ENSG00000250790	RP11-46H11.3	chr12	132911471	132914732	rs72624274:133414251:C:T	132837665	132837665	0	4.21e-10	0.410011	0.0640106	-2165	Promoter non-eGene eQTLs
ENSG00000132964	CDK8	chr13	26254105	26405238	rs11617826:26780441:C:T	26206304	26206304	0	9.27e-23	-2.08663	0.199721	15887	Distal non-eGene eQTLs
ENSG00000127870	RNF6	chr13	26132116	26222493	rs56875324:26781053:TA:T	26206916	26206917	0	4.9e-13	-4.01332	0.536897	15577	Distal eGene eQTLs
ENSG00000132970	WASF3	chr13	26557704	26688948	rs541202:27138389:A:G	26564252	26564252	1	4.97e-07	0.411463	0.0805041	-6549	Distal eGene eQTLs
ENSG00000180660	MAB21L1	chr13	35474183	35477209	rs1031776:36047374:G:A	35473237	35473237	0	2.15e-07	6.49131	1.23005	3972	Distal eGene eQTLs
ENSG00000172915	NBEA	chr13	34942288	35673022	rs9574068:36087418:C:T	35513281	35513281	0	2.11e-13	0.747692	0.0983778	-570994	Distal eGene eQTLs
ENSG00000123179	EBPL	chr13	49660724	49691475	rs9568308:50265238:C:T	49691102	49691102	0	3.01e-20	-1.01356	0.104104	373	Promoter-eGene eQTLs
ENSG00000123179	EBPL	chr13	49660724	49691475	rs3809325:50266109:T:C	49691973	49691973	1	3.97e-09	-0.408117	0.0678083	-498	Promoter-eGene eQTLs
ENSG00000198553	KCNRG	chr13	50015255	50020922	rs374955850:50691596:CAAAAAAAAAAA:C	50117460	50117471	0	6.64e-08	0.199208	0.0361946	-35289	Distal non-eGene eQTLs
ENSG00000253710	ALG11	chr13	52012399	52029664	rs73184330:52571856:G:C	51997720	51997720	0	2.62e-13	1.01257	0.133795	14678	Distal eGene eQTLs
ENSG00000183098	GPC6	chr13	93226843	94407401	rs4773723:93891725:T:C	93239472	93239472	0	4.36e-26	0.681894	0.0600687	-12630	Distal eGene eQTLs
ENSG00000277767	RP11-365P13.5	chr13	110916005	110917827	rs28364778:111568187:T:A	110915840	110915840	0	2.03e-19	-0.739195	0.0778586	164	Promoter-eGene eQTLs
ENSG00000102606	ARHGEF7	chr13	111114560	111305737	rs9560002:111829012:C:T	111176665	111176665	1	1.39e-09	0.558941	0.0901168	-62106	Distal eGene eQTLs
ENSG00000235280	MCF2L-AS1	chr13	112967485	112968824	rs3011549:113634937:A:C	112980623	112980623	0	2.36e-11	-0.529315	0.076969	-11799	Distal eGene eQTLs
ENSG00000267868	RP11-120K24.3	chr13	112964836	112966131	rs9549328:113636156:C:T	112981842	112981842	1	1.33e-05	0.366898	0.083209	-15711	Distal eGene eQTLs
ENSG00000267868	RP11-120K24.3	chr13	112964836	112966131	rs9577414:113643975:A:G	112989661	112989661	0	2.08e-09	1.28769	0.210002	-23530	Distal eGene eQTLs
ENSG00000235280	MCF2L-AS1	chr13	112967485	112968824	rs146111686:113661387:T:C	113007073	113007073	1	2.82e-05	1.3835	0.326572	-38249	Distal eGene eQTLs
ENSG00000150403	TMCO3	chr13	113490996	113554590	rs2282307:113664537:A:G	113010223	113010223	1	5.65e-07	-0.36545	0.0718639	-1445	Promoter non-eGene eQTLs
ENSG00000092200	RPGRIP1	chr14	21287940	21351301	rs10131045:21685173:C:T	21217014	21217014	0	6e-10	-18.818	2.96561	52480	Distal non-eGene eQTLs
ENSG00000279656	RP11-298I3.6	chr14	23023084	23024217	rs11846575:23491284:C:G	23022075	23022075	0	4.62e-61	-1.14653	0.0581018	2142	Promoter-eGene eQTLs
ENSG00000100804	PSMB5	chr14	23016544	23035230	rs11846575:23491284:C:G	23022075	23022075	0	6.27e-24	0.773736	0.0718403	13155	Distal eGene eQTLs
ENSG00000100804	PSMB5	chr14	23016544	23035230	exm1089413	23034812	23034812	1	5.21e-06	-0.669338	0.144919	418	Promoter-eGene eQTLs
ENSG00000100884	CPNE6	chr14	24070838	24078100	rs62000824:24549030:C:G	24079821	24079821	0	2.3e-09	-3.40106	0.556247	-8984	Distal eGene eQTLs
ENSG00000258655	ARHGAP5-AS1	chr14	32074947	32076793	rs72664669:32558751:T:C	32089545	32089545	0	6.46e-07	0.989401	0.195607	-12752	Distal eGene eQTLs
ENSG00000151320	AKAP6	chr14	32329274	32837681	rs10141207:32691785:G:A	32222579	32222579	0	2.35e-08	-0.478449	0.0839649	-20534	Distal non-eGene eQTLs
ENSG00000126775	ATG14	chr14	55366393	55411858	rs199561042:55714321:T:TCA	55247603	55247603	0	1.12e-05	-1.36249	0.306207	-6523	Distal non-eGene eQTLs
ENSG00000178974	FBXO34	chr14	55271304	55361918	rs67245332:55732412:GT:G	55265694	55265695	0	1.39e-05	1.35361	0.307612	5609	Distal eGene eQTLs
ENSG00000258776	RP11-1085N6.5	chr14	56817571	56893710	rs860325:57344118:A:T	56877400	56877400	0	2.96e-13	-11.496	1.52263	16310	Distal eGene eQTLs
ENSG00000100614	PPM1A	chr14	60245753	60299087	rs61992495:60745330:T:C	60278612	60278612	0	1.51e-06	6.49417	1.32991	-32860	Distal eGene eQTLs
ENSG00000198133	TMEM229B	chr14	67447085	67533739	rs1555399:67984370:T:A	67517653	67517653	0	1.11e-17	-0.593218	0.0660989	16086	Distal eGene eQTLs
ENSG00000100568	VTI1B	chr14	67647076	67674831	rs8018479:68199232:T:C	67732515	67732515	1	5.95e-05	-0.301072	0.0741931	-30629	Distal non-eGene eQTLs
ENSG00000072110	ACTN1	chr14	68874144	68979440	rs55779567:70016268:A:G	69549551	69549551	1	2.2e-05	-0.71766	0.167099	11919	Distal non-eGene eQTLs
ENSG00000100647	SUSD6	chr14	69611597	69715142	rs11846784:70126199:G:A	69659482	69659482	0	6.33e-08	2.75731	0.500156	-47886	Distal eGene eQTLs
ENSG00000279026	RP3-414A15.12	chr14	73580695	73582918	rs740976:73255917:A:G	72789209	72789209	3	5.14e-05	0.434636	0.106175	64122	Distal non-eGene eQTLs
ENSG00000119599	DCAF4	chr14	72926333	72959703	rs12432949:73339967:G:A	72873259	72873259	0	7.72e-09	0.521032	0.0883045	-19928	Distal non-eGene eQTLs
ENSG00000259065	RP5-1021I20.1	chr14	73787361	73803270	rs12587785:74256119:G:A	73789416	73789416	1	2.24e-06	0.352984	0.0735288	-2056	Promoter-eGene eQTLs
ENSG00000198208	RPS6KL1	chr14	74903955	74923396	rs880947	74935436	74935436	0	5.59e-06	-2.04258	0.443723	-12040	Distal eGene eQTLs
ENSG00000280078	RP11-361H10.5	chr14	76279174	76283103	rs73311946:77425656:C:T	76959313	76959313	1	2.3e-05	-0.930144	0.217137	325	Promoter non-eGene eQTLs
ENSG00000273729	RP11-7F17.8	chr14	77028087	77031572	rs148680952:77568267:A:G	77101924	77101924	0	3.41e-08	2.13481	0.379249	-15478	Distal non-eGene eQTLs
ENSG00000198894	CIPC	chr14	77098098	77117287	rs61990307:77594561:G:A	77128218	77128218	0	2.15e-15	-4.91584	0.595156	-30121	Distal eGene eQTLs
ENSG00000100577	GSTZ1	chr14	77320885	77331597	rs8008449:77780784:G:A	77314441	77314441	0	6.49e-25	0.741748	0.0672016	6443	Distal eGene eQTLs
ENSG00000275198	RP11-471B22.3	chr14	90383366	90387973	rs7156456:90864608:T:G	90398264	90398264	0	5.39e-06	0.168948	0.0366396	-14899	Distal eGene eQTLs
ENSG00000183576	SETD3	chr14	99397747	99480889	rs12878462:99887102:C:G	99420765	99420765	0	7.16e-20	8.51935	0.884978	60124	Distal eGene eQTLs
ENSG00000247970	RP11-543C4.1	chr14	99604557	99625740	rs12891978:100076939:A:C	99610602	99610602	0	5.67e-08	0.144852	0.026176	-6046	Distal eGene eQTLs
ENSG00000182218	HHIPL1	chr14	99645111	99680569	rs2144800	99619113	99619113	1	2.01e-05	0.304192	0.0704887	-137944	Distal non-eGene eQTLs
ENSG00000066629	EML1	chr14	99737694	99942060	rs11625037:100221324:C:G	99754987	99754987	0	1.09e-11	9.88438	1.41232	-17294	Distal eGene eQTLs
ENSG00000022976	ZNF839	chr14	102317378	102342702	rs11404221:102783599:T:TG	102317262	102317262	0	1.11e-11	1.34244	0.191902	115	Promoter-eGene eQTLs
ENSG00000166166	TRMT61A	chr14	103529185	103537073	rs2756119:104001517:G:A	103535180	103535180	0	3.31e-06	-0.297751	0.0631203	-5996	Distal eGene eQTLs
ENSG00000269958	RP11-73M18.8	chr14	103696354	103697163	rs729438:104092789:G:A	103626452	103626452	0	6.1e-06	0.100403	0.0219023	-64556	Distal non-eGene eQTLs
ENSG00000137877	SPTBN5	chr15	41848145	41894077	rs1197691:42175104:G:C	41882906	41882906	0	3.46e-07	-15.8861	3.06485	11171	Distal eGene eQTLs
ENSG00000103966	EHD4	chr15	41895940	41972578	rs34833430:42205706:C:CT	41913508	41913508	0	3.13e-12	-1.82259	0.253372	59070	Distal eGene eQTLs
ENSG00000103994	ZNF106	chr15	42412824	42491123	rs28414375:43419210:A:G	43127012	43127012	0	9.31e-06	4.00041	0.890875	-20899	Distal non-eGene eQTLs
ENSG00000179523	EIF3J-AS1	chr15	44527258	44536923	15:44087760:C:G	43795562	43795562	0	0.000115245	1.11055	0.285157	-1803	Promoter non-eGene eQTLs
ENSG00000138606	SHF	chr15	45167215	45201175	rs60001836:45454949:G:T	45162751	45162751	0	3.27e-07	0.380507	0.073246	38424	Distal eGene eQTLs
ENSG00000069966	GNB5	chr15	52115106	52191369	rs34439773:52450095:T:TA	52157898	52157898	0	2.53e-09	0.528491	0.0866656	33471	Distal eGene eQTLs
ENSG00000069966	GNB5	chr15	52115106	52191369	rs28631249:52454887:C:G	52162690	52162690	1	3.54e-05	0.505734	0.120914	28679	Distal eGene eQTLs
ENSG00000259577	RP11-430B1.2	chr15	52180094	52205874	rs12593939:52469192:A:G	52176995	52176995	0	5.2e-19	-0.451105	0.0481242	3098	Distal eGene eQTLs
ENSG00000171914	TLN2	chr15	62390527	62844631	rs2459898:62701834:T:A	62409635	62409635	0	4.4e-32	0.919805	0.0713098	-19109	Distal eGene eQTLs
ENSG00000140416	TPM1	chr15	63042633	63071915	rs16946330:63324501:C:G	63032302	63032302	0	4.04e-08	5.58873	0.998434	10330	Distal eGene eQTLs
ENSG00000166128	RAB8B	chr15	63189470	63267782	rs8041454:63485976:T:C	63193777	63193777	0	1.28e-13	-2.10052	0.273722	-4308	Distal eGene eQTLs
ENSG00000278737	RP11-325L12.7	chr15	65083043	65083663	15:64816762:CA:C	64524563	64524564	0	2.01e-05	3.19095	0.739393	-136815	Distal non-eGene eQTLs
ENSG00000246922	UBAP1L	chr15	65092771	65115197	15:64816762:CA:C	64524563	64524564	0	1.4e-05	72.858	16.5653	-136815	Distal non-eGene eQTLs
ENSG00000103671	TRIP4	chr15	64387749	64455303	rs10635518:64930193:T:TTA	64637994	64637994	0	8.84e-08	-1.61017	0.295473	-250246	Distal eGene eQTLs
ENSG00000180357	ZNF609	chr15	64460743	64686068	rs11631564:64973611:G:A	64681412	64681412	0	1.4e-06	4.7258	0.964783	-220670	Distal eGene eQTLs
ENSG00000265967	AC100830.4	chr15	64695042	64695594	rs11631564:64973611:G:A	64681412	64681412	0	1.18e-07	0.19949	0.0369803	13629	Distal eGene eQTLs
ENSG00000103710	RASL12	chr15	65053338	65076690	rs7170256:65375072:C:T	65082734	65082734	0	1.12e-13	0.543515	0.070638	-6044	Distal eGene eQTLs
ENSG00000103710	RASL12	chr15	65053338	65076690	15:65684422:T:TCCCCC	65392084	65392084	1	6.17e-05	-0.35847	0.0885287	-14044	Distal non-eGene eQTLs
ENSG00000103742	IGDCC4	chr15	65381465	65423072	rs12437686:65686908:A:G	65394570	65394570	1	2.53e-09	0.545697	0.0894917	28502	Distal eGene eQTLs
ENSG00000166938	DIS3L	chr15	66293218	66333898	rs80341284:65702019:A:G	65409681	65409681	2	2.62e-05	0.861077	0.202451	-31641	Distal non-eGene eQTLs
ENSG00000140474	ULK3	chr15	74836117	74843346	rs1867152:75239204:C:T	74946863	74946863	0	4.51e-05	-3.78507	0.917643	-8695	Distal non-eGene eQTLs
ENSG00000138621	PPCDC	chr15	75023556	75117462	rs34492112:75294917:G:A	75002576	75002576	0	4.8e-06	-0.447667	0.0965512	20979	Distal eGene eQTLs
ENSG00000198794	SCAMP5	chr15	74957220	75021496	rs7342591:75306863:A:G	75014522	75014522	0	7.56e-16	-1.09864	0.130719	-57303	Distal eGene eQTLs
ENSG00000169752	NRG4	chr15	75935970	76059795	rs4886747:76151081:G:A	75858740	75858740	0	1.24e-46	3.79415	0.231317	201055	Distal eGene eQTLs
ENSG00000140391	TSPAN3	chr15	77041405	77083984	rs11630497:77334787:T:C	77042446	77042446	0	4.54e-24	23.0261	2.13039	41538	Distal eGene eQTLs
ENSG00000269951	RP11-797A18.6	chr15	77067655	77068325	rs938501:77368712:T:A	77076370	77076370	0	2.01e-08	0.182566	0.0318787	-8045	Distal eGene eQTLs
ENSG00000173517	PEAK1	chr15	77100657	77420144	rs113274654:77390571:T:C	77098229	77098229	1	8.17e-11	0.497349	0.0744916	321915	Distal eGene eQTLs
ENSG00000140382	HMG20A	chr15	77420413	77485607	15:77411350:C:CATTTACTTATAAACTGTGCAGCAGGAGAACAAAACCAGAAGGTTGA	77119008	77119008	0	9.89e-14	0.522688	0.0677754	-125649	Distal non-eGene eQTLs
ENSG00000169783	LINGO1	chr15	77613028	77820900	rs868298:77873672:C:A	77581330	77581330	0	5.52e-10	1.79603	0.282418	239570	Distal eGene eQTLs
ENSG00000136379	ABHD17C	chr15	80679685	80755621	rs35505201:81032198:G:GCTGT	80739857	80739857	0	1.22e-10	1.46541	0.221671	-60173	Distal eGene eQTLs
ENSG00000140511	HAPLN3	chr15	88877289	88895626	rs16942443:89439824:T:C	88896593	88896593	0	1.02e-23	-1.072	0.100068	-967	Promoter-eGene eQTLs
ENSG00000140511	HAPLN3	chr15	88877289	88895626	rs146809851:89456554:G:A	88913323	88913323	1	2.05e-08	-0.82412	0.143989	-17697	Distal eGene eQTLs
ENSG00000166823	MESP1	chr15	89748662	89751310	rs150457886:89520430:A:G	88977199	88977199	0	9.44e-06	0.458521	0.102186	13046	Distal non-eGene eQTLs
ENSG00000185033	SEMA4B	chr15	90160605	90229679	rs72449355:90724732:CA:C	90181500	90181501	0	1.5e-09	12.9364	2.0903	-20896	Distal eGene eQTLs
ENSG00000213471	TTLL13P	chr15	90249531	90265482	rs8026662:91783807:C:T	91240577	91240577	1	2.57e-05	0.343653	0.0807073	-140627	Distal non-eGene eQTLs
ENSG00000153048	CARHSP1	chr16	8852943	8869012	rs71155426:9059405:C:CA	8965548	8965548	0	6.71e-08	-0.396292	0.072027	-1034	Promoter non-eGene eQTLs
ENSG00000182108	DEXI	chr16	10928892	10942460	rs8055876	10948537	10948537	0	1.51e-05	-0.49668	0.113384	-6077	Distal eGene eQTLs
ENSG00000122299	ZC3H7A	chr16	11750587	11797267	rs111511279:11887388:C:CA	11793532	11793532	0	3.49e-07	-2.7615	0.532904	3735	Distal eGene eQTLs
ENSG00000234719	RP11-166B2.1	chr16	11927374	11976643	rs393329:12070422:T:C	11976565	11976565	0	5.38e-103	-1.19332	0.0402882	78	Promoter-eGene eQTLs
ENSG00000283662	RP11-57A19.7	chr16	28258687	28292173	rs146481001:27725049:T:TA	27713728	27713728	0	3.98e-05	0.112508	0.0270765	-163595	Distal non-eGene eQTLs
ENSG00000070729	CNGB1	chr16	57882341	57971116	rs2405011	57960331	57960331	0	3.76e-05	44.8006	10.7471	10785	Distal eGene eQTLs
ENSG00000132600	PRMT7	chr16	68310975	68358563	rs79543001:68387341:C:T	68353438	68353438	0	3.93e-17	0.988216	0.112215	-42464	Distal eGene eQTLs
ENSG00000072736	NFATC3	chr16	68084752	68229259	rs375035451:68403120:C:CAAA	68369217	68369217	0	5.93e-06	1.10542	0.240812	1045	Promoter non-eGene eQTLs
ENSG00000214353	VAC14-AS1	chr16	70755099	70773251	rs3785425:70728477:G:A	70694574	70694574	0	7.77e-07	0.248774	0.0495531	-8508	Distal non-eGene eQTLs
ENSG00000103111	MON1B	chr16	77190836	77202405	rs2232509:77231935:C:T	77198038	77198038	0	9.86e-38	0.818953	0.0573103	-7203	Distal eGene eQTLs
ENSG00000205078	SYCE1L	chr16	77199398	77213215	rs56277205:77237363:CA:C	77203466	77203467	0	8.37e-38	-0.664935	0.0464761	-4069	Distal eGene eQTLs
ENSG00000103160	HSDL1	chr16	84122147	84145192	rs71404148:84117589:G:C	84083984	84083984	0	3.96e-08	5.3035	0.946892	2606	Distal non-eGene eQTLs
ENSG00000261286	RP11-517C16.2	chr16	84459260	84467361	rs12933197:84504731:G:C	84471125	84471125	0	2.09e-11	1.10019	0.159543	24474	Distal non-eGene eQTLs
ENSG00000261286	RP11-517C16.2	chr16	84459260	84467361	rs36139298:84525010:T:G	84491404	84491404	1	2.59e-15	0.536034	0.0651051	4195	Distal non-eGene eQTLs
ENSG00000140950	TLDC1	chr16	84476422	84554033	rs454253:84536028:G:C	84502422	84502422	1	3.04e-12	0.512293	0.0711741	51611	Distal eGene eQTLs
ENSG00000103194	USP10	chr16	84699979	84779922	rs4783055:84742203:C:A	84708597	84708597	0	1.83e-14	6.3052	0.792454	-8619	Distal eGene eQTLs
ENSG00000275393	RP11-568J23.8	chr16	85697336	85697868	rs400882:85754652:G:A	85721046	85721046	0	1.15e-06	0.273348	0.0553405	20654	Distal non-eGene eQTLs
ENSG00000140941	MAP1LC3B	chr16	87383996	87404779	rs8059409:87381066:T:C	87347460	87347460	0	3.51e-11	0.514832	0.0755615	36535	Distal eGene eQTLs
ENSG00000103264	FBXO31	chr16	87326988	87392142	rs8059409:87381066:T:C	87347460	87347460	0	5.84e-46	-9.36957	0.576764	44682	Distal eGene eQTLs
ENSG00000140948	ZCCHC14	chr16	87406247	87492045	exm2260608	87360780	87360780	0	1.9e-05	-4.3953	1.01561	1756	Promoter non-eGene eQTLs
ENSG00000004660	CAMKK1	chr17	3860316	3894891	rs8065798:3781793:T:C	3878499	3878499	0	2.97e-09	-1.76174	0.290247	16392	Distal eGene eQTLs
ENSG00000132535	DLG4	chr17	7189891	7219702	rs222854:7112880:C:T	7209561	7209561	0	2.75e-08	15.7175	2.77262	10141	Distal eGene eQTLs
ENSG00000184619	KRBA2	chr17	8368638	8376711	rs33988099:8284348:AT:A	8381030	8381031	0	1.08e-09	3.60441	0.577171	-4319	Distal eGene eQTLs
ENSG00000109047	RCVRN	chr17	9896321	9905621	rs75438860:9801828:T:C	9898511	9898511	0	6.46e-41	-0.975941	0.0648284	7110	Distal eGene eQTLs
ENSG00000266709	RP11-214O1.2	chr17	14303855	14305505	rs7223809:14200898:G:A	14297581	14297581	0	5.8e-12	0.737284	0.103878	6273	Distal eGene eQTLs
ENSG00000278864	RP11-45M22.2	chr17	17181505	17183257	rs4985717:16971521:G:A	17068207	17068207	0	4.79e-07	0.649375	0.126872	-25662	Distal non-eGene eQTLs
ENSG00000227543	SPAG5-AS1	chr17	28598791	28617377	rs2286519:26881730:G:A	28554712	28554712	0	6.19e-07	-1.12923	0.222875	-2044	Promoter non-eGene eQTLs
ENSG00000221995	TIAF1	chr17	29073522	29078857	rs8080570:27413403:T:C	29086385	29086385	0	8.63e-21	-1.52653	0.154316	-7528	Distal eGene eQTLs
ENSG00000108671	PSMD11	chr17	32444262	32483318	rs11651449:30640807:A:G	32313788	32313788	0	1.17e-05	1.18268	0.266463	-171334	Distal non-eGene eQTLs
ENSG00000263874	LINC00672	chr17	38925169	38929384	exm2252970	39066873	39066873	1	5.75e-06	0.318047	0.0691816	-9854	Distal non-eGene eQTLs
ENSG00000161381	PLXDC1	chr17	39063304	39154394	rs9891236:37239671:A:G	39083418	39083418	0	1.21e-07	11.2708	2.09141	70976	Distal eGene eQTLs
ENSG00000171475	WIPF2	chr17	40219305	40284136	rs71152664:38485389:CT:C	40329137	40329138	0	1.32e-05	1.27514	0.289032	-41504	Distal non-eGene eQTLs
ENSG00000108349	CASC3	chr17	40140319	40172183	rs9894845:38506457:T:C	40350205	40350205	1	3.01e-06	-0.736166	0.155404	334	Promoter non-eGene eQTLs
ENSG00000108352	RAPGEFL1	chr17	40177011	40195656	rs200353854:38507378:ACTCTCC:A	40351126	40351132	0	7.36e-29	7.34511	0.608129	-587	Promoter non-eGene eQTLs
ENSG00000141699	FAM134C	chr17	42579514	42610623	rs145714922:39836099:A:AAGAG	41679847	41679847	1	3.25e-05	0.287387	0.0683741	-14281	Distal non-eGene eQTLs
ENSG00000279602	CTD-3014M21.1	chr17	43360042	43361361	rs1842146:41435160:C:T	43357792	43357792	0	2.56e-21	-1.2008	0.119566	3569	Distal eGene eQTLs
ENSG00000198496	NBR2	chr17	43125611	43153671	rs4793236:41436440:T:C	43359072	43359072	0	9.12e-55	-1.03222	0.0564451	2289	Promoter non-eGene eQTLs
ENSG00000279602	CTD-3014M21.1	chr17	43360042	43361361	rs111620717:41438698:G:A	43361330	43361330	1	5.21e-13	0.594395	0.0796177	31	Promoter-eGene eQTLs
ENSG00000184988	TMEM106A	chr17	43211836	43220041	rs12947882:41440464:C:G	43363096	43363096	0	5.32e-05	-0.134594	0.0329452	-1735	Promoter non-eGene eQTLs
ENSG00000175906	ARL4D	chr17	43398960	43401137	rs75854888:41487451:G:A	43410083	43410083	0	1.57e-05	31.0935	7.11144	-11124	Distal eGene eQTLs
ENSG00000108786	HSD17B1	chr17	42549215	42555213	rs2880542:41491168:T:C	43413800	43413800	0	8.82e-06	-0.254788	0.0565877	-1373	Promoter non-eGene eQTLs
ENSG00000161654	LSM12	chr17	44034636	44067619	rs77288674:42182171:CCCACTG:C	44104803	44104809	0	3.4e-05	-1.6098	0.383971	11109	Distal non-eGene eQTLs
ENSG00000260793	RP5-882C2.2	chr17	44221402	44223710	rs113844752:42297631:C:A	44220263	44220263	0	3.36e-12	-0.453474	0.0631374	1138	Promoter-eGene eQTLs
ENSG00000172992	DCAKD	chr17	45023341	45061109	rs4793173:43127715:A:C	45050347	45050347	0	1.31e-58	3.41968	0.178384	10762	Distal eGene eQTLs
ENSG00000136448	NMT1	chr17	45051611	45109016	rs59138429:43132613:T:G	45055245	45055245	0	8.51e-28	-1.03588	0.08777	-3635	Distal eGene eQTLs
ENSG00000181513	ACBD4	chr17	45132601	45144181	rs4986169:43207849:G:A	45130482	45130482	0	1.46e-07	0.773731	0.144559	2118	Promoter-eGene eQTLs
ENSG00000198933	TBKBP1	chr17	47694082	47712050	rs7213086:45752310:C:G	47674944	47674944	0	1.03e-13	-1.24771	0.161899	19137	Distal eGene eQTLs
ENSG00000228782	CTD-2026D20.3	chr17	47450569	47492492	rs6503796:45765249:T:C	47687883	47687883	0	4.13e-28	-0.41253	0.0347131	-38463	Distal non-eGene eQTLs
ENSG00000229980	TOB1-AS1	chr17	50866680	50909737	rs12949115:48944345:C:A	50866984	50866984	0	1.81e-09	0.252719	0.0410496	-305	Promoter-eGene eQTLs
ENSG00000247011	RP11-700H6.1	chr17	50934990	50944713	rs4794193:49024963:T:C	50947602	50947602	0	5.9e-17	-0.400177	0.0457248	-2889	Distal eGene eQTLs
ENSG00000261873	RP11-515E23.1	chr17	55448434	55511444	rs55824040:53587577:GTATGCATTCC:G	55510216	55510226	0	4.19e-74	1.07604	0.0473331	1228	Promoter-eGene eQTLs
ENSG00000261873	RP11-515E23.1	chr17	55448434	55511444	rs716391:53589444:T:C	55512083	55512083	1	1.38e-05	0.513016	0.116552	-639	Promoter-eGene eQTLs
ENSG00000121057	AKAP1	chr17	57085093	57121349	rs2230772:55183203:T:C	57105842	57105842	0	1.44e-09	-3.80632	0.614357	-20750	Distal eGene eQTLs
ENSG00000180891	CUEDC1	chr17	57861244	57955323	rs73329834:55940910:A:G	57863549	57863549	0	1.08e-05	-2.6485	0.594307	91774	Distal eGene eQTLs
ENSG00000136451	VEZF1	chr17	57971548	57988259	rs11413908:56002479:T:TA	57925118	57925118	1	3.04e-05	-0.361671	0.0857273	-90369	Distal non-eGene eQTLs
ENSG00000136451	VEZF1	chr17	57971548	57988259	rs72839919:56053780:C:A	57976419	57976419	0	4.65e-06	-0.761488	0.163996	11840	Distal eGene eQTLs
ENSG00000173826	KCNH6	chr17	63523335	63548977	rs148903398:62180026:T:C	64102666	64102666	1	3.79e-05	1.26585	0.3038	28153	Distal non-eGene eQTLs
ENSG00000108654	DDX5	chr17	64499617	64508199	rs1991401:62502435:A:G	64506317	64506317	0	2.49e-09	-31.9556	5.23792	1882	Promoter-eGene eQTLs
ENSG00000258890	CEP95	chr17	64506589	64542461	rs57166100:62506280:T:C	64510162	64510162	0	1.88e-09	9.80081	1.59364	-3574	Distal eGene eQTLs
ENSG00000108932	SLC16A6	chr17	68267027	68291267	rs59684065:66291262:TGAG:T	68295121	68295124	1	1.88e-05	-0.31364	0.0724206	-3854	Distal eGene eQTLs
ENSG00000214140	PRCD	chr17	76527587	76553578	rs4648340:74542217:C:T	76546135	76546135	0	1.44e-16	0.667374	0.0773167	-18549	Distal eGene eQTLs
ENSG00000267543	RP11-666A8.7	chr17	76549952	76550826	rs4648340:74542217:C:T	76546135	76546135	0	5.54e-40	6.3681	0.429368	-18549	Distal non-eGene eQTLs
ENSG00000214140	PRCD	chr17	76527587	76553578	rs34207189:74569198:C:T	76573116	76573116	1	9.45e-07	-0.522763	0.104966	-3324	Distal non-eGene eQTLs
ENSG00000070731	ST6GALNAC2	chr17	76565380	76586956	rs16967307	76577450	76577450	0	4.44e-40	-14.5106	0.976867	9506	Distal eGene eQTLs
ENSG00000163597	SNHG16	chr17	76557767	76565348	rs16967307	76577450	76577450	0	2.15e-22	-0.924352	0.0893438	-7658	Distal non-eGene eQTLs
ENSG00000182534	MXRA7	chr17	76672552	76711016	rs75118211:74700311:G:A	76704229	76704229	1	4.15e-23	0.663976	0.0629694	6787	Distal eGene eQTLs
ENSG00000070495	JMJD6	chr17	76712833	76726799	rs2240774:74710572:T:C	76714490	76714490	0	8.29e-13	-0.511302	0.0691344	12309	Distal eGene eQTLs
ENSG00000267665	RP11-13K12.2	chr17	77526999	77536592	rs36085797:75523518:G:A	77527436	77527436	0	1.96e-24	-4.72972	0.433605	-438	Promoter-eGene eQTLs
ENSG00000055483	USP36	chr17	78787382	78841441	rs867596:76791217:G:A	78795135	78795135	0	1.81e-12	4.94264	0.679178	46306	Distal eGene eQTLs
ENSG00000262877	RP11-1055B8.4	chr17	81388127	81390256	rs67602958:79378593:G:A	81404793	81404793	0	5.01e-15	-4.89902	0.60179	-14537	Distal eGene eQTLs
ENSG00000280351	CTD-2561B21.8	chr17	81003336	81005132	rs71367062:79480536:G:GC	81513510	81513510	0	8.59e-06	0.274189	0.0608183	-447	Promoter non-eGene eQTLs
ENSG00000204237	OXLD1	chr17	81665037	81666635	rs79482383:79624373:T:C	81657343	81657343	0	1.58e-08	1.22912	0.212976	9292	Distal eGene eQTLs
ENSG00000214087	ARL16	chr17	81681175	81683924	rs12325779:79630217:A:G	81663187	81663187	1	2.37e-05	0.737701	0.172482	-75	Promoter non-eGene eQTLs
ENSG00000141568	FOXK2	chr17	82519714	82644662	rs138836510:80509109:C:T	82551233	82551233	0	3.96e-06	0.899566	0.192292	-31520	Distal eGene eQTLs
ENSG00000272788	RP11-674N23.4	chr18	8801657	8802305	rs62086598:8800095:G:A	8800097	8800097	0	1.26e-08	-0.189263	0.0325642	1559	Promoter-eGene eQTLs
ENSG00000168502	MTCL1	chr18	8705662	8832778	rs632423:8809445:G:C	8809447	8809447	0	1.63e-26	-20.6987	1.80538	-103786	Distal eGene eQTLs
ENSG00000178127	NDUFV2	chr18	9102631	9134345	rs4798783:9174885:G:A	9174887	9174887	1	1.97e-05	-0.329813	0.0763513	-72257	Distal eGene eQTLs
ENSG00000134508	CABLES1	chr18	23134565	23260467	rs80349711:20754224:T:C	23174260	23174260	0	1.09e-05	-2.67605	0.600703	-39696	Distal eGene eQTLs
ENSG00000170558	CDH2	chr18	27950967	28177446	rs11564398:25668568:T:C	28088604	28088604	1	7.97e-06	-0.357252	0.0789509	88842	Distal eGene eQTLs
ENSG00000170558	CDH2	chr18	27950967	28177446	rs34258746:25677337:TAAA:T	28097373	28097376	0	9.07e-07	-0.370572	0.0742829	80073	Distal eGene eQTLs
ENSG00000167306	MYO5B	chr18	49822814	50195093	rs9963529:47498874:T:G	49972504	49972504	0	9.63e-13	0.56842	0.077093	222589	Distal eGene eQTLs
ENSG00000267322	SNHG22	chr18	49814024	49851059	rs9949712:47677840:T:C	50151470	50151470	2	1.96e-05	-0.298148	0.0690043	-180513	Distal non-eGene eQTLs
ENSG00000167306	MYO5B	chr18	49822814	50195093	rs77015246:47705364:A:G	50178994	50178994	2	1.21e-06	-1.05244	0.213494	16099	Distal eGene eQTLs
ENSG00000166569	CPLX4	chr18	59275157	59318649	rs12232751:56966260:G:A	59299028	59299028	0	1.03e-08	-0.451521	0.0772004	19621	Distal eGene eQTLs
ENSG00000081913	PHLPP1	chr18	62715451	62980433	rs187210763:60383787:T:G	62716554	62716554	0	3.12e-07	6.3167	1.2138	-1104	Promoter-eGene eQTLs
ENSG00000180011	ZADH2	chr18	75195109	75209348	rs73478102:72919317:A:G	75207362	75207362	0	1.79e-05	-7.84526	1.80708	1986	Promoter-eGene eQTLs
ENSG00000166377	ATP9B	chr18	79069286	79378283	rs78121206:77677285:G:A	79917285	79917285	0	3.34e-05	2.19864	0.523879	-53617	Distal non-eGene eQTLs
ENSG00000122490	PQLC1	chr18	79902421	79951664	rs118027503:77687518:G:A	79927518	79927518	1	2.6e-08	0.861364	0.151659	24146	Distal eGene eQTLs
ENSG00000226742	HSBP1L1	chr18	79964562	79970822	rs75287701:77730600:A:G	79970600	79970600	0	7.53e-18	-1.7742	0.196569	-6039	Distal eGene eQTLs
ENSG00000160953	MUM1	chr19	1354712	1378431	rs72981673:1355350:G:A	1355351	1355351	1	3.6e-07	-0.564059	0.10898	-640	Promoter-eGene eQTLs
ENSG00000160953	MUM1	chr19	1354712	1378431	rs62127614:1365044:G:A	1365045	1365045	0	2e-11	-0.666598	0.0965622	-10334	Distal eGene eQTLs
ENSG00000129911	KLF16	chr19	1852400	1863568	rs11880925:1852078:C:G	1852079	1852079	1	2.13e-10	-0.496405	0.0761474	11489	Distal eGene eQTLs
ENSG00000129911	KLF16	chr19	1852400	1863568	rs3746045:1854557:A:G	1854558	1854558	0	1.57e-30	0.916554	0.0732884	9010	Distal eGene eQTLs
ENSG00000031823	RANBP3	chr19	5916140	5978142	rs10418425:5058357:C:G	5058346	5058346	0	1.15e-05	-1.19732	0.269457	-155266	Distal non-eGene eQTLs
ENSG00000141994	DUS3L	chr19	5784833	5791238	rs368649123:5808768:CTT:C	5808757	5808759	1	3.61e-07	-0.498751	0.0963756	-17519	Distal eGene eQTLs
ENSG00000156413	FUT6	chr19	5830611	5839731	rs72263148:5820276:CA:C	5820265	5820266	0	2.96e-10	-0.51297	0.0793558	-29027	Distal non-eGene eQTLs
ENSG00000174886	NDUFA11	chr19	5891277	5904006	rs141026056:5938908:AT:A	5938897	5938898	0	6.61e-08	-1.20635	0.219145	39245	Distal non-eGene eQTLs
ENSG00000187650	VMAC	chr19	5904859	5910853	rs78256469:5945240:G:A	5945229	5945229	0	3.05e-05	0.289529	0.0686476	32913	Distal non-eGene eQTLs
ENSG00000105519	CAPS	chr19	5911708	5916208	rs434040:5984815:T:C	5984804	5984804	0	7.83e-12	-0.622386	0.0882712	-6662	Distal non-eGene eQTLs
ENSG00000087903	RFX2	chr19	5993165	6199572	rs113727564:6202894:G:A	6202883	6202883	0	1.91e-05	0.92878	0.214618	-3311	Distal eGene eQTLs
ENSG00000080511	RDH8	chr19	10013250	10022279	rs34101494:10129973:C:CA	10019297	10019297	0	1.7e-36	-16.3988	1.1722	-6048	Distal eGene eQTLs
ENSG00000129347	KRI1	chr19	10553079	10566037	rs148172637:10681823:C:T	10571147	10571147	0	1.48e-19	6.23242	0.653702	-5110	Distal eGene eQTLs
ENSG00000197256	KANK2	chr19	11164268	11197791	rs34224957:11262583:C:CT	11151907	11151907	0	1.36e-11	2.96543	0.425837	-62545	Distal non-eGene eQTLs
ENSG00000105127	AKAP8	chr19	15353386	15379798	rs3826863:15529020:A:G	15418209	15418209	0	3.41e-05	-0.86616	0.20664	932	Promoter non-eGene eQTLs
ENSG00000127527	EPS15L1	chr19	16355240	16472085	rs73006531:16710008:C:T	16599197	16599197	0	2.79e-08	2.42643	0.428206	-26815	Distal non-eGene eQTLs
ENSG00000130304	SLC27A1	chr19	17468770	17506168	rs56384297:17566409:G:T	17455600	17455600	0	5.66e-09	1.32081	0.221764	13169	Distal eGene eQTLs
ENSG00000269736	CTD-2521M24.11	chr19	17452212	17452969	rs12460896:17568119:C:T	17457310	17457310	1	7.79e-10	0.464985	0.0737957	-4341	Distal eGene eQTLs
ENSG00000171773	NXNL1	chr19	17455426	17460954	rs73020413:17578930:A:G	17468121	17468121	0	1.28e-18	-0.798136	0.0862172	-7167	Distal eGene eQTLs
ENSG00000269736	CTD-2521M24.11	chr19	17452212	17452969	rs8109373	17469175	17469175	0	4.43e-13	-0.665319	0.0888275	-16206	Distal eGene eQTLs
ENSG00000181035	SLC25A42	chr19	19064000	19112888	rs144131688:19192809:A:G	19082000	19082000	0	2.3e-06	3.26818	0.681581	-18001	Distal eGene eQTLs
ENSG00000213965	NUDT19	chr19	32691962	32713796	rs259294:33169003:A:C	32678097	32678097	0	7.39e-09	1.34815	0.228177	-1500	Promoter non-eGene eQTLs
ENSG00000105186	ANKRD27	chr19	32597008	32676597	rs10417773:33169097:G:T	32678191	32678191	0	1.04e-18	7.21451	0.777084	-1594	Promoter-eGene eQTLs
ENSG00000225872	LINC01529	chr19	35785698	35797902	rs2272537:36195586:T:C	35704684	35704684	0	6.33e-10	-1.03661	0.163595	-157	Promoter non-eGene eQTLs
ENSG00000232677	LINC00665	chr19	36313068	36331718	rs12462708	37306676	37306676	0	3.19e-14	0.51707	0.0656459	6161	Distal non-eGene eQTLs
ENSG00000186020	ZNF529	chr19	36534775	36605276	rs141079180:37813459:T:C	37322557	37322557	1	4.56e-07	-1.58542	0.309145	-9720	Distal non-eGene eQTLs
ENSG00000276846	CTD-3220F14.3	chr19	37314869	37315620	rs34306276:37814062:C:CT	37323160	37323160	1	3.1e-06	0.444168	0.0938869	-7540	Distal eGene eQTLs
ENSG00000188283	ZNF383	chr19	37217927	37248738	rs256744:37855488:A:G	37364586	37364586	0	0.000142802	-0.435497	0.113403	-51749	Distal non-eGene eQTLs
ENSG00000267640	CTD-2554C21.2	chr19	37817360	37832160	rs11671972:37863626:T:G	37372724	37372724	1	8.51e-07	0.376674	0.0753068	-1663	Promoter non-eGene eQTLs
ENSG00000171747	LGALS4	chr19	38801672	38813364	19:39345087:AT:A	38854447	38854448	0	1.54e-06	-0.136906	0.0280622	-2100	Promoter non-eGene eQTLs
ENSG00000187994	RINL	chr19	38867835	38878279	19:39345087:AT:A	38854447	38854448	0	9.56e-10	0.673661	0.107508	-2100	Promoter non-eGene eQTLs
ENSG00000130669	PAK4	chr19	39125771	39182816	rs61105046:39650999:CCAGA:C	39160359	39160363	0	7.93e-13	-1.20416	0.162668	-34589	Distal eGene eQTLs
ENSG00000142252	GEMIN7	chr19	45079196	45091524	rs3178166:45594170:A:G	45090912	45090912	0	1.04e-16	-0.443772	0.0511514	-11717	Distal eGene eQTLs
ENSG00000012061	ERCC1	chr19	45407334	45478828	rs2298881:45926916:C:A	45423658	45423658	0	6.61e-10	-0.698913	0.110431	55170	Distal eGene eQTLs
ENSG00000267757	EML2-AS1	chr19	45641495	45642840	rs6509227:46141677:A:G	45638419	45638419	0	2.55e-35	1.17603	0.0858288	3075	Distal eGene eQTLs
ENSG00000105392	CRX	chr19	47819780	47843330	rs12974951	47842671	47842671	0	1.39e-11	-47.4068	6.81023	-22892	Distal eGene eQTLs
ENSG00000169393	ELSPBP1	chr19	47994652	48025153	rs16982100:48511888:T:G	48008631	48008631	1	2.83e-06	0.73606	0.154948	-13980	Distal eGene eQTLs
ENSG00000188334	BSPH1	chr19	47968047	47992170	rs35439716:48513045:AT:A	48009788	48009789	0	1.19e-22	0.477997	0.0458852	-15137	Distal non-eGene eQTLs
ENSG00000105507	CABP5	chr19	48029954	48044053	rs201980175:48514705:T:TGAC	48011448	48011448	0	5.58e-54	-1.33708	0.0738472	32605	Distal eGene eQTLs
ENSG00000269420	PLA2G4C-AS1	chr19	48061372	48064945	rs201980175:48514705:T:TGAC	48011448	48011448	0	2.03e-32	-1.08455	0.0835369	49923	Distal eGene eQTLs
ENSG00000105499	PLA2G4C	chr19	48047844	48110817	rs186856015:48519804:C:T	48016547	48016547	0	1.51e-07	-0.563799	0.105462	94270	Distal eGene eQTLs
ENSG00000169393	ELSPBP1	chr19	47994652	48025153	rs28412366:48519925:A:G	48016668	48016668	0	4.35e-43	-1.18439	0.076071	-22017	Distal eGene eQTLs
ENSG00000105507	CABP5	chr19	48029954	48044053	rs141506489:48546432:A:AT	48043175	48043175	1	2.36e-07	0.374118	0.0711386	878	Promoter-eGene eQTLs
ENSG00000104888	SLC17A7	chr19	49429402	49442360	rs11673671:49943948:G:C	49440691	49440691	0	1.77e-11	-32.1869	4.64996	1669	Promoter-eGene eQTLs
ENSG00000039650	PNKP	chr19	49859883	49878351	rs11365269:50371262:CT:C	49868005	49868006	1	5.75e-06	0.341392	0.0742639	10346	Distal eGene eQTLs
ENSG00000167685	ZNF444	chr19	56132600	56160893	rs274176:56661904:A:G	56150535	56150535	0	1.77e-08	-0.92016	0.160025	-17936	Distal eGene eQTLs
ENSG00000071575	TRIB2	chr2	12716890	12742734	rs77773048:12858078:G:A	12717952	12717952	0	2.68e-10	17.3276	2.67358	-1063	Promoter-eGene eQTLs
ENSG00000084676	NCOA1	chr2	24491915	24770702	rs1135342:24714831:G:T	24491962	24491962	0	1.33e-08	-5.61579	0.967872	-48	Promoter-eGene eQTLs
ENSG00000213639	PPP1CB	chr2	28751641	28802940	rs12714243:28992293:G:A	28769427	28769427	0	3.51e-13	8.03626	1.06798	-17787	Distal eGene eQTLs
ENSG00000179270	C2orf71	chr2	29060977	29074261	rs7585244:29283509:C:T	29060643	29060643	0	1.2e-06	19.2156	3.89728	13618	Distal eGene eQTLs
ENSG00000119801	YPEL5	chr2	30146942	30160533	rs78589710:30389542:G:A	30166676	30166676	0	7.72e-06	14.1525	3.12272	-19735	Distal eGene eQTLs
ENSG00000150938	CRIM1	chr2	36355927	36551135	rs3770955:36595271:A:T	36368128	36368128	0	4.2e-09	-5.85034	0.973615	-12202	Distal eGene eQTLs
ENSG00000115825	PRKD3	chr2	37250503	37324808	rs4670688	37313917	37313917	1	4.97e-14	0.627161	0.0802771	10891	Distal eGene eQTLs
ENSG00000115825	PRKD3	chr2	37250503	37324808	exm187359	37316401	37316401	3	7.78e-06	-0.724848	0.160001	8407	Distal eGene eQTLs
ENSG00000115828	QPCT	chr2	37344575	37373322	rs6711685:37548757:G:C	37321614	37321614	0	1.14e-14	-0.974947	0.121493	3194	Distal non-eGene eQTLs
ENSG00000162878	PKDCC	chr2	42048021	42058528	rs4952398:42288769:T:G	42061629	42061629	0	2.86e-10	-12.1005	1.87021	-13609	Distal eGene eQTLs
ENSG00000250565	ATP6V1E2	chr2	46490751	46542557	rs3754553:46769135:T:C	46541996	46541996	0	5e-21	-0.873365	0.0876863	561	Promoter-eGene eQTLs
ENSG00000115310	RTN4	chr2	54972188	55112621	rs2255112:55200800:T:G	54973664	54973664	0	1.66e-33	-68.0762	5.13628	138957	Distal eGene eQTLs
ENSG00000270820	RP11-355B11.2	chr2	61471189	61484130	rs11902573:61663095:G:A	61435960	61435960	1	5.19e-05	0.428801	0.10481	35228	Distal eGene eQTLs
ENSG00000170264	FAM161A	chr2	61824855	61854143	rs368470075:62075959:A:T	61848824	61848824	0	2.34e-14	1.35366	0.170885	5319	Distal eGene eQTLs
ENSG00000119862	LGALSL	chr2	64453970	64461381	rs9284770:64663006:C:G	64435872	64435872	0	2.63e-06	-9.90604	2.07853	18097	Distal eGene eQTLs
ENSG00000115902	SLC1A4	chr2	64988478	65023865	rs113756095:64684769:C:A	64457635	64457635	1	1.96e-05	1.0576	0.24476	-7539	Distal non-eGene eQTLs
ENSG00000221823	PPP3R1	chr2	68178858	68256237	rs145256468:68429538:TTTG:T	68202406	68202409	2	3.41e-05	0.319931	0.0763309	53831	Distal eGene eQTLs
ENSG00000273275	RP11-474G23.2	chr2	68179834	68180532	rs70949683:68431485:G:GAT	68204353	68204353	0	1.75e-09	-0.167309	0.0271511	48517	Distal non-eGene eQTLs
ENSG00000196975	ANXA4	chr2	69644426	69827100	rs10496171	69788049	69788049	0	2.08e-14	4.01841	0.506196	-143624	Distal eGene eQTLs
ENSG00000035141	FAM136A	chr2	70295976	70302090	rs3771530:70164805:G:C	69937673	69937673	0	6.3e-06	-0.632028	0.138084	-44113	Distal non-eGene eQTLs
ENSG00000152672	CLEC4F	chr2	70808644	70820600	rs66468957:71114291:T:C	70887161	70887161	0	2.59e-47	-12.586	0.759962	710	Promoter non-eGene eQTLs
ENSG00000231386	AC007395.4	chr2	70810799	70811474	rs66468957:71114291:T:C	70887161	70887161	0	1.47e-11	-0.870211	0.125178	710	Promoter non-eGene eQTLs
ENSG00000116031	CD207	chr2	70830215	70835822	rs66468957:71114291:T:C	70887161	70887161	0	1.95e-36	-1.51855	0.108661	710	Promoter non-eGene eQTLs
ENSG00000144031	ANKRD53	chr2	70978381	70985499	rs60499273:71204588:T:TAGACCACGGTCCGCC	70977458	70977458	0	2.2e-07	-0.424058	0.0804211	922	Promoter-eGene eQTLs
ENSG00000144043	TEX261	chr2	70985939	70994945	rs7583998:71217538:G:A	70990408	70990408	0	2.02e-08	6.98111	1.2192	4537	Distal eGene eQTLs
ENSG00000115350	POLE4	chr2	74958493	74970128	rs1982788:75170639:T:G	74943512	74943512	0	5.84e-31	0.76955	0.0610009	14980	Distal eGene eQTLs
ENSG00000159239	C2orf81	chr2	74393837	74421662	rs2129602:75175032:G:A	74947905	74947905	0	6.56e-06	0.625267	0.136879	-29757	Distal non-eGene eQTLs
ENSG00000236209	AC104135.2	chr2	74919556	74924846	rs12366:75185856:G:T	74958729	74958729	0	2.12e-62	0.459462	0.0229268	-237	Promoter non-eGene eQTLs
ENSG00000115350	POLE4	chr2	74958493	74970128	rs186105805:75188803:T:C	74961676	74961676	1	1.34e-05	-0.977718	0.221788	-3184	Distal eGene eQTLs
ENSG00000153561	RMND5A	chr2	86720174	86778041	2:86150424:C:CT	85923301	85923301	1	4.81e-05	-0.324649	0.0789977	-34287	Distal non-eGene eQTLs
ENSG00000153094	BCL2L11	chr2	111119379	111168447	rs12233011:112641283:A:G	111883706	111883706	0	6.92e-10	-0.459659	0.0727173	984	Promoter non-eGene eQTLs
ENSG00000153208	MERTK	chr2	111898480	112029561	rs72823500:112695386:T:G	111937809	111937809	2	3.12e-05	0.68803	0.163317	-39330	Distal eGene eQTLs
ENSG00000231747	AC079922.2	chr2	112621810	112622167	exm2265342	112631655	112631655	0	3.06e-18	-0.837277	0.0915657	-9488	Distal eGene eQTLs
ENSG00000144136	SLC20A1	chr2	112645858	112663827	exm2265342	112631655	112631655	0	4.07e-17	7.8945	0.896936	14202	Distal eGene eQTLs
ENSG00000237753	AC079922.3	chr2	112641833	112645690	rs6542069:113392181:C:T	112634604	112634604	0	2.96e-25	0.888208	0.079806	11086	Distal eGene eQTLs
ENSG00000260634	RP11-521O16.1	chr2	127024253	127025723	rs934826:127825968:G:A	127068392	127068392	0	5.98e-10	0.166119	0.0261768	38963	Distal non-eGene eQTLs
ENSG00000136717	BIN1	chr2	127048028	127107355	rs10538293:127863046:T:C	127105470	127105470	0	1.62e-19	0.62676	0.0658168	1885	Promoter-eGene eQTLs
ENSG00000136717	BIN1	chr2	127048028	127107355	rs10189896:127866347:G:A	127108771	127108771	1	2.35e-06	-0.346232	0.0722777	-1416	Promoter-eGene eQTLs
ENSG00000136699	SMPD4	chr2	130151393	130182750	rs150962599:131871534:A:G	131113961	131113961	0	1.26e-06	3.18315	0.646752	-20501	Distal non-eGene eQTLs
ENSG00000237772	AC092620.3	chr2	138604511	138613167	rs35595094:139325556:G:A	138567986	138567986	0	3.46e-06	-0.774019	0.16442	36524	Distal eGene eQTLs
ENSG00000198648	STK39	chr2	167954021	168248141	rs11339372:169008248:CA:C	168151738	168151739	2	8.42e-06	-0.35864	0.0794709	96403	Distal eGene eQTLs
ENSG00000198648	STK39	chr2	167954021	168248141	rs11890527:169031488:T:C	168174978	168174978	0	2.66e-12	-0.605037	0.0838198	73163	Distal eGene eQTLs
ENSG00000198648	STK39	chr2	167954021	168248141	rs6755369:169036091:G:A	168179581	168179581	1	1.13e-11	0.689233	0.0985563	68560	Distal eGene eQTLs
ENSG00000188452	CERKL	chr2	181536677	181680665	rs200917645:182416280:TA:T	181551553	181551554	0	1.86e-08	-3.61569	0.629844	129112	Distal eGene eQTLs
ENSG00000138434	SSFA2	chr2	181891834	181930738	rs150775467:182454706:AT:A	181589979	181589980	1	5.41e-05	0.530917	0.13009	90686	Distal non-eGene eQTLs
ENSG00000162992	NEUROD1	chr2	181673089	181680876	rs6709122:182507723:G:C	181642996	181642996	0	2.56e-14	20.1607	2.54932	37880	Distal eGene eQTLs
ENSG00000138386	NAB1	chr2	190646747	190692766	rs58515841:191500718:A:T	190635992	190635992	0	2.53e-06	2.52217	0.528244	10754	Distal eGene eQTLs
ENSG00000196290	NIF3L1	chr2	200889328	200903930	rs79446796:201716749:G:A	200852026	200852026	0	5.41e-05	3.96904	0.972573	11221	Distal non-eGene eQTLs
ENSG00000082126	MPP4	chr2	201644871	201698694	rs17384293:202529479:T:C	201664756	201664756	0	8.53e-06	48.0374	10.6517	33938	Distal eGene eQTLs
ENSG00000118242	MREG	chr2	215942806	216034096	rs13030243:216807227:C:T	215942504	215942504	1	1.47e-09	0.595224	0.0961337	91592	Distal eGene eQTLs
ENSG00000118242	MREG	chr2	215942806	216034096	rs4622721	215961413	215961413	0	1.36e-11	0.892095	0.128099	72683	Distal eGene eQTLs
ENSG00000144452	ABCA12	chr2	214931543	215138428	rs34089302:216870130:T:TG	216005407	216005407	0	2.3e-05	-0.379117	0.0884873	-63688	Distal non-eGene eQTLs
ENSG00000171450	CDK5R2	chr2	218959656	218962162	exm265186	218394133	218394133	0	4.22e-07	8.45072	1.64281	-12104	Distal non-eGene eQTLs
ENSG00000135912	TTLL4	chr2	218710846	218755416	rs3770211:219269729:G:T	218405006	218405006	0	8.94e-08	3.1564	0.579453	-2360	Promoter non-eGene eQTLs
ENSG00000135925	WNT10A	chr2	218880364	218899581	rs3840475:219743789:TC:T	218879067	218879068	0	7.43e-08	-0.406806	0.0742014	1296	Promoter-eGene eQTLs
ENSG00000135929	CYP27A1	chr2	218781750	218815293	rs143248068:219748212:G:A	218883490	218883490	0	2.88e-05	-4.63868	1.09624	-41891	Distal non-eGene eQTLs
ENSG00000235024	AC097468.7	chr2	218944630	218961903	rs359981:219828118:T:C	218963396	218963396	0	1.01e-05	-0.29731	0.0664905	-1493	Promoter-eGene eQTLs
ENSG00000072182	ASIC4	chr2	219514171	219538772	rs56171119:220386815:C:T	219522093	219522093	0	7.71e-07	-2.02111	0.402454	-7923	Distal eGene eQTLs
ENSG00000181798	LINC00471	chr2	231508427	231514339	rs28685161:232378792:C:T	231514081	231514081	0	1.15e-45	-0.499725	0.0308919	258	Promoter-eGene eQTLs
ENSG00000283312	RP11-562I5.1	chr2	231493709	231495299	rs28685161:232378792:C:T	231514081	231514081	0	7.21e-61	-1.57052	0.0797667	258	Promoter non-eGene eQTLs
ENSG00000171596	NMUR1	chr2	231523161	231530495	rs12464121:232379712:A:G	231515001	231515001	0	6.01e-32	6.22681	0.484024	15494	Distal eGene eQTLs
ENSG00000157985	AGAP1	chr2	235494090	236131800	rs12465126:236585493:A:G	235676849	235676849	0	5.2e-10	-13.8059	2.16744	-182760	Distal eGene eQTLs
ENSG00000130294	KIF1A	chr2	240713765	240820308	rs13391736:241746497:G:A	240807080	240807080	0	7.29e-06	12.3776	2.72341	13228	Distal eGene eQTLs
ENSG00000101307	SIRPB1	chr20	1563522	1620061	rs6075340	1913689	1913689	0	2.26e-95	1.39504	0.0502644	-19522	Distal non-eGene eQTLs
ENSG00000198053	SIRPA	chr20	1894168	1940592	rs66600581:1895601:C:T	1914955	1914955	0	2.75e-16	-0.578859	0.067756	-20788	Distal eGene eQTLs
ENSG00000198053	SIRPA	chr20	1894168	1940592	rs6136492:1923972:C:T	1943326	1943326	1	5.56e-07	0.411525	0.0808759	-49159	Distal eGene eQTLs
ENSG00000171867	PRNP	chr20	4686237	4701590	rs6107515:4671381:T:G	4690735	4690735	0	8.02e-08	12.8027	2.34144	-4499	Distal eGene eQTLs
ENSG00000101265	RASSF2	chr20	4780024	4823645	rs3746674:4764629:G:A	4783983	4783983	0	7.56e-10	63.6697	10.0965	39662	Distal eGene eQTLs
ENSG00000089057	SLC23A2	chr20	4852357	5010293	rs6053018:4971886:G:C	4991240	4991240	0	1.8e-09	23.1065	3.75271	19053	Distal eGene eQTLs
ENSG00000125827	TMX4	chr20	7977349	8019829	exm1524618	7982394	7982394	1	2.23e-07	0.840623	0.159495	37435	Distal eGene eQTLs
ENSG00000132639	SNAP25	chr20	10218831	10307418	rs2184146:10205305:A:G	10224657	10224657	0	8.26e-06	43.6593	9.66543	-5827	Distal eGene eQTLs
ENSG00000101384	JAG1	chr20	10637685	10674107	rs2423508:10617156:T:G	10636508	10636508	0	2.61e-10	-5.46236	0.84231	37599	Distal eGene eQTLs
ENSG00000149346	SLX4IP	chr20	10435304	10636829	rs7828	10638366	10638366	0	5.73e-12	1.35332	0.190619	-203063	Distal eGene eQTLs
ENSG00000197183	NOL4L	chr20	32443060	32585074	rs142664447:30916415:C:CA	32328612	32328612	0	5.25e-09	-8.09168	1.35557	-50948	Distal non-eGene eQTLs
ENSG00000078699	CBFA2T2	chr20	33490076	33650036	rs34434947:32042420:CA:C	33454614	33454615	0	7.01e-13	0.508363	0.068502	-10722	Distal non-eGene eQTLs
ENSG00000131067	GGT7	chr20	34844721	34872860	rs36024514:33357648:TGAC:T	34769845	34769848	0	1.97e-07	-0.378127	0.0714195	-65555	Distal non-eGene eQTLs
ENSG00000149639	SOGA1	chr20	36777443	36863686	rs6101995:35362139:C:T	36733736	36733736	0	1.85e-06	2.87649	0.594206	12342	Distal non-eGene eQTLs
ENSG00000118705	RPN2	chr20	37178411	37241623	rs6073782:35871134:A:C	37242731	37242731	0	7.87e-06	4.6541	1.0279	-64321	Distal eGene eQTLs
ENSG00000124145	SDC4	chr20	45325289	45348424	rs2267868:43969840:C:T	45341200	45341200	0	2.25e-17	0.701434	0.078985	7224	Distal eGene eQTLs
ENSG00000124145	SDC4	chr20	45325289	45348424	rs2251358:43972682:G:C	45344042	45344042	1	2.72e-05	0.445388	0.104928	4382	Distal eGene eQTLs
ENSG00000080189	SLC35C2	chr20	46345981	46364458	rs13040414:44982335:A:G	46353696	46353696	0	3.87e-06	-3.39416	0.724735	10762	Distal eGene eQTLs
ENSG00000283078	RP11-11M20.4	chr20	62066831	62068437	rs73152429:60605117:C:T	62030061	62030061	0	5.62e-07	0.824047	0.162017	36769	Distal eGene eQTLs
ENSG00000101197	BIRC7	chr20	63235884	63240507	rs68041888:61851699:G:A	63220347	63220347	0	5.56e-14	0.393313	0.0504499	-2306	Promoter non-eGene eQTLs
ENSG00000275620	FLJ16779	chr20	63253979	63261615	rs113658090:61852875:T:C	63221523	63221523	1	7.01e-06	0.407385	0.089468	-43023	Distal non-eGene eQTLs
ENSG00000229299	RP4-583P15.10	chr20	63744690	63745958	rs150556970:62577502:G:A	63946149	63946149	1	6.92e-06	-1.50141	0.329532	-3423	Distal non-eGene eQTLs
ENSG00000198276	UCKL1	chr20	63939830	63956415	rs817310:62580642:C:G	63949289	63949289	0	7.17e-06	2.92602	0.643302	7126	Distal eGene eQTLs
ENSG00000142188	TMEM50B	chr21	33432486	33480011	rs2834247:35056729:G:A	33684424	33684424	2	1.32e-05	-0.332285	0.0753271	-42024	Distal non-eGene eQTLs
ENSG00000157540	DYRK1A	chr21	37365791	37517450	rs13052173:38784359:A:C	37412057	37412057	0	4.51e-05	-4.89483	1.18656	-46267	Distal eGene eQTLs
ENSG00000157578	LCA5L	chr21	39405845	39445805	rs73367987:40817100:T:C	39445174	39445174	0	7.96e-14	0.768432	0.0992333	631	Promoter-eGene eQTLs
ENSG00000157617	C2CD2	chr21	41885113	41953890	rs13052308:43347556:C:T	41927447	41927447	0	7.77e-07	-4.00336	0.797413	26443	Distal eGene eQTLs
ENSG00000160216	AGPAT3	chr21	43865187	43986536	rs71322544:45359824:G:C	43939943	43939943	0	1.03e-07	-10.3477	1.90919	-74757	Distal eGene eQTLs
ENSG00000235374	SSR4P1	chr21	45070953	45074165	rs35515701:46532310:A:G	45112395	45112395	1	8.04e-06	-0.660522	0.146033	-38230	Distal eGene eQTLs
ENSG00000280604	PCBP3-OT1	chr21	45914297	45919483	rs74459266:47236206:C:T	45816292	45816292	0	2.57e-07	-0.417561	0.0796548	-172598	Distal non-eGene eQTLs
ENSG00000182362	YBEY	chr21	46286338	46297751	21:47921555:T:TGAACTCCTGGGCTC	46501642	46501642	4	3.12e-05	-0.816146	0.193729	-42743	Distal non-eGene eQTLs
ENSG00000241832	CECR3	chr22	17256860	17266733	rs4819987:17743563:T:C	17262673	17262673	0	3.58e-14	0.809308	0.102966	4060	Distal eGene eQTLs
ENSG00000099954	CECR2	chr22	17359950	17558149	rs5992672:17850784:T:A	17370843	17370843	0	1.09e-07	-6.16461	1.13951	-10894	Distal eGene eQTLs
ENSG00000099968	BCL2L13	chr22	17628856	17730855	rs725769:18210560:T:G	17727794	17727794	0	1.5e-17	-15.9022	1.77979	-98939	Distal eGene eQTLs
ENSG00000100099	HPS4	chr22	26443424	26483837	rs1000815:26831077:A:G	26435111	26435111	1	3.53e-07	0.363524	0.0701851	48726	Distal eGene eQTLs
ENSG00000261188	CTA-445C9.14	chr22	26512538	26514568	rs139306199:26831676:TAAAAGAAAAGAAAAGAAAAG:T	26435710	26435730	0	1.38e-18	0.654403	0.0707668	-6437	Distal non-eGene eQTLs
ENSG00000261188	CTA-445C9.14	chr22	26512538	26514568	rs62225810:26844955:C:A	26448989	26448989	2	2.26e-06	-0.72049	0.150139	-19716	Distal non-eGene eQTLs
ENSG00000099992	TBC1D10A	chr22	30291991	30327046	rs9606716:30728453:G:A	30332464	30332464	0	1.48e-05	5.56699	1.2692	-5418	Distal eGene eQTLs
ENSG00000237977	EIF4HP2	chr22	30902220	30902781	rs55694472:31279889:C:T	30883902	30883902	0	5.02e-07	1.01494	0.198653	-190120	Distal non-eGene eQTLs
ENSG00000196588	MKL1	chr22	40410282	40636702	rs139064:40886557:T:C	40490553	40490553	0	1.23e-15	-0.550889	0.0660799	146149	Distal eGene eQTLs
ENSG00000100401	RANGAP1	chr22	41245612	41286251	rs11704524:41683144:G:C	41287140	41287140	0	8.29e-16	-4.83163	0.575755	-889	Promoter-eGene eQTLs
ENSG00000100403	ZC3H7B	chr22	41301523	41360147	rs67630029:41683387:T:TG	41287383	41287383	0	1.54e-10	-3.45025	0.524967	14139	Distal eGene eQTLs
ENSG00000100138	SNU13	chr22	41673931	41690504	exm-rs5751086	41372858	41372858	0	8.67e-08	-0.44136	0.0809381	-5525	Distal non-eGene eQTLs
ENSG00000100413	POLR3H	chr22	41525805	41544606	rs132919:41809903:G:C	41413899	41413899	0	5.93e-13	-1.64565	0.221	-46566	Distal non-eGene eQTLs
ENSG00000100410	PHF5A	chr22	41459718	41468725	rs79013:41889363:A:T	41493359	41493359	0	4.61e-05	0.555602	0.134858	-24234	Distal non-eGene eQTLs
ENSG00000100207	TCF20	chr22	42160014	42343616	rs8142108:42726357:G:T	42330351	42330351	0	5.11e-05	-1.15374	0.281758	13265	Distal eGene eQTLs
ENSG00000128274	A4GALT	chr22	42692122	42721298	rs5759015	42895523	42895523	0	3.67e-10	-0.450375	0.0700637	119622	Distal non-eGene eQTLs
ENSG00000186951	PPARA	chr22	46150522	46243756	rs135549	46157413	46157413	0	1.74e-58	0.960219	0.0501618	-6892	Distal eGene eQTLs
ENSG00000205643	CDPF1	chr22	46244012	46250679	rs135549	46157413	46157413	0	4.98e-06	-0.228159	0.0492928	-6892	Distal non-eGene eQTLs
ENSG00000280384	RP4-695O20.1	chr22	46163304	46165347	rs135539:46559267:C:A	46163368	46163368	0	4.16e-09	0.159212	0.0264884	-65	Promoter-eGene eQTLs
ENSG00000206573	THUMPD3-AS1	chr3	9349690	9398579	rs2596913:9436472:T:C	9394788	9394788	0	1.11e-08	0.41705	0.0714816	3791	Distal eGene eQTLs
ENSG00000197548	ATG7	chr3	11272310	11557665	rs2574710:11614342:C:A	11572868	11572868	1	2.81e-05	-0.41253	0.0973507	-300559	Distal eGene eQTLs
ENSG00000144560	VGLL4	chr3	11556071	11771350	rs9867971:11647366:A:G	11605892	11605892	1	1.88e-07	0.435681	0.0821416	165458	Distal eGene eQTLs
ENSG00000255021	RP11-536I6.2	chr3	14272374	14303845	rs11711684	14281424	14281424	1	8.58e-08	-0.526867	0.0965813	22421	Distal eGene eQTLs
ENSG00000255021	RP11-536I6.2	chr3	14272374	14303845	rs9869724:14330905:A:G	14289405	14289405	0	6.81e-50	0.906773	0.0528378	14440	Distal eGene eQTLs
ENSG00000255021	RP11-536I6.2	chr3	14272374	14303845	rs56353289:14347445:G:A	14305945	14305945	2	2.84e-05	0.404245	0.0954504	-2100	Promoter-eGene eQTLs
ENSG00000251576	LINC01267	chr3	14348452	14352568	rs34200660:14411417:C:T	14369917	14369917	1	3.58e-13	-0.809722	0.107651	24731	Distal non-eGene eQTLs
ENSG00000251576	LINC01267	chr3	14348452	14352568	rs1865884	14370155	14370155	0	1.01e-37	0.905501	0.0633801	24493	Distal non-eGene eQTLs
ENSG00000225733	FGD5-AS1	chr3	14920348	14948424	3:14485310:C:G	14443802	14443802	1	3.7e-05	0.625906	0.150009	-49154	Distal non-eGene eQTLs
ENSG00000182568	SATB1	chr3	18345388	18445588	rs199730219:18467316:G:GGGGCAGGAC	18425824	18425824	0	8.28e-07	5.11144	1.02078	19764	Distal eGene eQTLs
ENSG00000114166	KAT2B	chr3	20040024	20154404	rs9852074:20086790:G:T	20045298	20045298	1	1.16e-06	-0.414051	0.0838628	-5275	Distal eGene eQTLs
ENSG00000170248	PDCD6IP	chr3	33798353	33869707	rs139804155:33819788:C:CCT	33778296	33778296	1	1.41e-05	-0.965164	0.219485	20056	Distal eGene eQTLs
ENSG00000182606	TRAK1	chr3	42013803	42225889	rs6775014:42207505:T:G	42166013	42166013	0	9.38e-10	11.8794	1.8948	-152211	Distal eGene eQTLs
ENSG00000177479	ARIH2	chr3	48918822	48986382	rs34604342:48962851:CT:C	48925418	48925419	0	7.43e-07	-0.354733	0.0705313	-6597	Distal eGene eQTLs
ENSG00000145020	AMT	chr3	49416776	49422753	rs35777653:48979485:A:AT	48942052	48942052	0	3.39e-06	1.1196	0.23761	-23231	Distal non-eGene eQTLs
ENSG00000164076	CAMKV	chr3	49857989	49870222	rs35451690:50168854:A:ACG	50131421	50131421	0	7.97e-27	1.31715	0.114066	24664	Distal non-eGene eQTLs
ENSG00000090097	PCBP4	chr3	51957455	51974016	rs323877:51999463:G:C	51965447	51965447	0	4.38e-12	-51.2908	7.18234	8569	Distal eGene eQTLs
ENSG00000114541	FRMD4B	chr3	69169991	69542583	rs57898618:69404178:GA:G	69355027	69355028	0	7.2e-07	4.01361	0.796986	187556	Distal eGene eQTLs
ENSG00000206535	LNP1	chr3	100401194	100456319	3:100136903:A:AC	100418059	100418059	0	2.14e-13	-3.76493	0.495485	-16866	Distal eGene eQTLs
ENSG00000144821	MYH15	chr3	108380370	108529322	rs7612356:107811037:C:G	108092190	108092190	1	1.71e-06	0.3803	0.0783056	-1165	Promoter non-eGene eQTLs
ENSG00000114446	IFT57	chr3	108160813	108222570	rs7639774:107816216:T:G	108097369	108097369	0	4.56e-23	3.67543	0.348934	-6344	Distal non-eGene eQTLs
ENSG00000196776	CD47	chr3	108043299	108091025	rs17231503	108098452	108098452	0	1.99e-68	-1.18624	0.0553693	-7427	Distal eGene eQTLs
ENSG00000279277	RP11-861A13.3	chr3	108036719	108038445	rs17231503	108098452	108098452	0	4.27e-35	-0.914413	0.0670056	-7427	Distal non-eGene eQTLs
ENSG00000144824	PHLDB2	chr3	111732498	111976517	rs4682298	111728212	111728212	0	1.41e-35	-0.588907	0.0427823	-53536	Distal non-eGene eQTLs
ENSG00000114491	UMPS	chr3	124730367	124749273	rs2055983:124480430:A:G	124761583	124761583	0	1.15e-14	0.711926	0.0887437	19572	Distal non-eGene eQTLs
ENSG00000082781	ITGB5	chr3	124761949	124901418	rs3836307:124489739:CG:C	124770892	124770893	0	8.42e-06	-2.12164	0.470129	130526	Distal eGene eQTLs
ENSG00000173706	HEG1	chr3	124965711	125055958	rs2877839	125058001	125058001	0	3.23e-13	-20.3967	2.70612	-2043	Promoter-eGene eQTLs
ENSG00000251474	RPL32P3	chr3	129382923	129399655	rs2285353	129492024	129492024	1	6.3e-07	0.858061	0.169471	-51988	Distal non-eGene eQTLs
ENSG00000163913	IFT122	chr3	129440037	129520507	rs2260840:129234259:T:C	129515416	129515416	0	7.75e-18	-2.74493	0.304248	-75380	Distal eGene eQTLs
ENSG00000250592	RP11-39E3.3	chr3	130899415	130929976	rs852209:130638074:C:T	130919230	130919230	0	8.83e-12	-5.13647	0.730448	10746	Distal eGene eQTLs
ENSG00000250543	RP11-442N1.1	chr3	139688404	139689342	rs9845929	139686016	139686016	0	1.34e-06	-2.37112	0.483168	3326	Distal eGene eQTLs
ENSG00000163864	NMNAT3	chr3	139560181	139678017	rs10935342:139405342:T:C	139686500	139686500	0	6.46e-07	-0.400173	0.0791148	-8483	Distal eGene eQTLs
ENSG00000163864	NMNAT3	chr3	139560181	139678017	rs55931700:139410394:T:TC	139691552	139691552	1	1.03e-05	0.381592	0.0854076	-13535	Distal eGene eQTLs
ENSG00000177311	ZBTB38	chr3	141324214	141449792	rs2871960	141402972	141402972	0	1.23e-14	6.59278	0.822729	-78759	Distal eGene eQTLs
ENSG00000120756	PLS1	chr3	142596388	142713664	rs35772119:142310692:G:GA	142591850	142591850	0	1.24e-07	2.59756	0.482434	4537	Distal eGene eQTLs
ENSG00000144959	NCEH1	chr3	172630250	172711218	rs13323236:172425597:T:C	172707807	172707807	0	9.92e-07	-3.1504	0.633835	3411	Distal eGene eQTLs
ENSG00000240024	LINC00888	chr3	183447609	183456013	rs78046106:183156963:C:T	183439175	183439175	0	4.96e-26	-0.871874	0.0769064	8433	Distal eGene eQTLs
ENSG00000273009	RP11-352G9.1	chr3	195913079	195913683	rs151017233:195640582:AGCT:A	195913711	195913714	1	2.2e-05	-1.00376	0.233734	-28	Promoter-eGene eQTLs
ENSG00000159733	ZFYVE28	chr4	2269583	2418663	rs35861674:2358232:G:A	2356505	2356505	0	3.31e-06	-0.70482	0.149424	62158	Distal eGene eQTLs
ENSG00000063978	RNF4	chr4	2462221	2625320	rs35847184:2472554:CT:C	2470827	2470828	0	4.47e-11	1.3597	0.200708	-8607	Distal eGene eQTLs
ENSG00000168884	TNIP2	chr4	2741649	2756376	rs13135697:2474781:A:G	2473054	2473054	0	3.13e-05	-0.68347	0.162265	-54080	Distal non-eGene eQTLs
ENSG00000173011	TADA2B	chr4	7041900	7057952	rs9986037:7050610:G:A	7048883	7048883	0	6.95e-18	4.10725	0.454528	-6984	Distal eGene eQTLs
ENSG00000169762	TAPT1	chr4	16160506	16227410	rs1356415:16057824:G:A	16056201	16056201	2	9.72e-06	0.68088	0.15196	28177	Distal non-eGene eQTLs
ENSG00000007062	PROM1	chr4	15963077	16084378	rs78824243:16080821:A:G	16079198	16079198	0	2.24e-06	52.9346	11.0271	5180	Distal eGene eQTLs
ENSG00000250317	SMIM20	chr4	25861831	25929874	rs6847307:25913582:G:A	25911960	25911960	0	4.03e-15	-0.577226	0.070639	-50130	Distal eGene eQTLs
ENSG00000091490	SEL1L3	chr4	25747428	25863760	rs936234:25919109:A:G	25917487	25917487	0	2.63e-16	-6.2238	0.72797	-55657	Distal non-eGene eQTLs
ENSG00000250317	SMIM20	chr4	25861831	25929874	rs16877748:25933687:T:G	25932065	25932065	2	3.77e-05	-0.365285	0.0876455	-70235	Distal eGene eQTLs
ENSG00000124406	ATP8A1	chr4	42408374	42657105	rs1460357:42631449:C:G	42629432	42629432	0	1.92e-24	-0.676974	0.0620483	27673	Distal eGene eQTLs
ENSG00000124406	ATP8A1	chr4	42408374	42657105	rs4629487:42659139:G:A	42657122	42657122	1	4.25e-06	-0.340724	0.0730692	-17	Promoter-eGene eQTLs
ENSG00000163293	NIPAL1	chr4	47914143	48040173	rs76552755:48019626:C:T	48017609	48017609	0	1.64e-44	3.63793	0.228724	-103467	Distal eGene eQTLs
ENSG00000156194	PPEF2	chr4	75859865	75902571	rs35334463:76818050:T:C	75896897	75896897	1	2.93e-06	0.378418	0.0797834	5674	Distal eGene eQTLs
ENSG00000138760	SCARB2	chr4	76158738	76213893	rs12512579:77111032:C:T	76189879	76189879	0	6.13e-10	-22.9728	3.6225	24014	Distal eGene eQTLs
ENSG00000272414	FAM47E-STBD1	chr4	76251722	76311129	rs6855568:77155591:C:T	76234438	76234438	1	2.08e-07	-0.39693	0.0751185	-20545	Distal non-eGene eQTLs
ENSG00000138641	HERC3	chr4	88521049	88708542	rs6532072:89497079:T:C	88575928	88575928	0	9.28e-10	-25.3988	4.05011	-54880	Distal eGene eQTLs
ENSG00000248019	FAM13A-AS1	chr4	88709790	88730103	rs6857847	88593421	88593421	0	1.2e-12	-15.2926	2.0836	-72373	Distal non-eGene eQTLs
ENSG00000271474	RP11-710C12.1	chr4	95549130	95552457	4:96446747:TAAA:T	95525596	95525599	0	1.4e-05	0.313429	0.0712652	23533	Distal eGene eQTLs
ENSG00000182168	UNC5C	chr4	95162505	95549206	rs1385668:96459330:A:G	95538179	95538179	0	4.43e-13	-0.500266	0.0667918	11027	Distal eGene eQTLs
ENSG00000260641	RP11-1299A16.3	chr4	98658905	98664550	rs28722480:99582072:G:A	98660921	98660921	0	7.4e-50	9.80364	0.571539	-2017	Promoter-eGene eQTLs
ENSG00000145362	ANK2	chr4	112818110	113383740	rs4834317:114060534:C:G	113139378	113139378	0	1.29e-11	-44.7547	6.41838	-321269	Distal eGene eQTLs
ENSG00000181004	BBS12	chr4	122732703	122744943	rs141240372:123637762:A:ACGTG	122716607	122716607	1	1.22e-15	-0.737785	0.0884766	16095	Distal eGene eQTLs
ENSG00000138685	FGF2	chr4	122826709	122898236	rs309356:123652077:T:C	122730922	122730922	1	1.81e-11	-0.50607	0.0731435	1271	Promoter non-eGene eQTLs
ENSG00000170153	RNF150	chr4	140859808	141212877	rs58005040:141941256:A:AT	141020102	141020102	1	3.38e-07	0.36689	0.0707155	192775	Distal eGene eQTLs
ENSG00000071205	ARHGAP10	chr4	147732064	148072780	rs6535558:148684996:T:C	147763845	147763845	0	2.2e-39	-16.2678	1.10758	-31782	Distal eGene eQTLs
ENSG00000169989	TIGD4	chr4	152769355	152779764	rs28542394:153700734:G:C	152779582	152779582	0	7.86e-06	2.71737	0.600121	182	Promoter-eGene eQTLs
ENSG00000052795	FNIP2	chr4	158769139	158908049	rs74931360:159709931:C:T	158788779	158788779	1	5.99e-10	-0.852089	0.134276	-19641	Distal eGene eQTLs
ENSG00000145414	NAF1	chr4	163110074	163166921	rs12513151:164784023:T:C	163862871	163862871	1	3.83e-05	-0.346621	0.0832357	69655	Distal non-eGene eQTLs
ENSG00000109472	CPE	chr4	165361195	165498320	rs13149691:166333652:A:T	165412500	165412500	0	1.5e-27	0.773444	0.0658931	-51306	Distal eGene eQTLs
ENSG00000248319	RP11-205M3.3	chr4	169917762	169975902	rs60833476:170883005:CAAA:C	169961854	169961857	0	1.26e-13	0.370462	0.0482593	14048	Distal eGene eQTLs
ENSG00000151726	ACSL1	chr4	184755596	184826818	rs74335426:185747653:TC:T	184826499	184826500	0	3.01e-09	-0.471947	0.0777809	319	Promoter-eGene eQTLs
ENSG00000164323	CFAP97	chr4	185159666	185209504	rs111425386:186123716:C:A	185202562	185202562	1	1.17e-09	-0.619641	0.0994377	6942	Distal eGene eQTLs
ENSG00000164323	CFAP97	chr4	185159666	185209504	rs3108296:186123731:G:T	185202577	185202577	0	2.93e-75	1.0814	0.0470157	6927	Distal eGene eQTLs
ENSG00000109762	SNX25	chr4	185204238	185370185	rs3108243:186126391:C:A	185205237	185205237	0	8.62e-70	10.9182	0.502259	-1000	Promoter-eGene eQTLs
ENSG00000109771	LRP2BP	chr4	185363880	185395899	rs112017996:186310213:T:C	185389059	185389059	0	2.9e-15	-1.06425	0.129508	6840	Distal eGene eQTLs
ENSG00000205129	C4orf47	chr4	185426250	185449826	rs11287696:186320666:TA:T	185399512	185399513	0	2.96e-08	-1.70875	0.302158	-28787	Distal non-eGene eQTLs
ENSG00000279943	FLJ38576	chr4	186189033	186191490	rs4862652	186155639	186155639	0	7.68e-06	0.144118	0.0317919	2257	Promoter non-eGene eQTLs
ENSG00000153395	LPCAT1	chr5	1456481	1523977	rs116737947:1514454:G:A	1514339	1514339	1	9.14e-06	0.746537	0.166106	9638	Distal eGene eQTLs
ENSG00000153395	LPCAT1	chr5	1456481	1523977	rs13157491:1586495:C:T	1586380	1586380	0	1.88e-10	-0.456409	0.0697855	-34670	Distal non-eGene eQTLs
ENSG00000185986	SDHAP3	chr5	1572223	1594620	rs112172852:1596952:C:G	1596837	1596837	0	1.27e-11	-1.188	0.170324	-2217	Promoter-eGene eQTLs
ENSG00000215218	UBE2QL1	chr5	6448624	6494909	rs1472757:6455872:T:C	6455759	6455759	1	7e-09	0.47282	0.0798963	-7136	Distal eGene eQTLs
ENSG00000112941	PAPD7	chr5	6713008	6757048	rs100841:6705857:G:A	6705744	6705744	0	1.67e-05	-1.17168	0.26882	7263	Distal eGene eQTLs
ENSG00000164327	RICTOR	chr5	38937920	39074408	rs13184911:39075394:C:T	39075292	39075292	0	8.5e-39	0.824502	0.0566796	-884	Promoter-eGene eQTLs
ENSG00000113448	PDE4D	chr5	58969039	60522120	rs138669344:58267837:AG:A	58972010	58972011	0	1.75e-06	-9.72618	2.00452	1550110	Distal eGene eQTLs
ENSG00000164346	NSA2	chr5	74766992	74780113	rs16872323:74134742:T:C	74838917	74838917	0	5.38e-117	12.4715	0.376022	26976	Distal non-eGene eQTLs
ENSG00000249713	CTD-2236F14.1	chr5	76606609	76608970	rs7735600	76573403	76573403	0	1.72e-07	0.118738	0.0223154	-196728	Distal non-eGene eQTLs
ENSG00000113319	RASGRF2	chr5	80960673	81230156	rs559181:80286819:A:T	80991000	80991000	0	1.85e-05	-4.40422	1.01619	-30328	Distal eGene eQTLs
ENSG00000145782	ATG12	chr5	115828201	115841858	rs1058600	115831016	115831016	0	1.07e-15	2.74228	0.328147	10842	Distal eGene eQTLs
ENSG00000164398	ACSL6	chr5	131949974	132012243	rs11740791:131321159:G:C	131985466	131985466	1	1.33e-10	-0.631972	0.0957957	26777	Distal eGene eQTLs
ENSG00000164398	ACSL6	chr5	131949974	132012243	rs253946:131330461:G:A	131994768	131994768	0	4.65e-28	0.90405	0.076159	17475	Distal eGene eQTLs
ENSG00000113522	RAD50	chr5	132556020	132646344	rs2070731:131819798:T:C	132484106	132484106	1	1.81e-05	0.314065	0.0723722	-73470	Distal non-eGene eQTLs
ENSG00000164405	UQCRQ	chr5	132866561	132868031	rs35994411:132278152:CT:C	132942460	132942461	0	4.33e-05	-1.52865	0.369707	472	Promoter non-eGene eQTLs
ENSG00000198944	SOWAHA	chr5	132813588	132816797	rs7714274:132295729:A:G	132960037	132960037	1	3.41e-05	0.303987	0.0725173	-17105	Distal non-eGene eQTLs
ENSG00000170606	HSPA4	chr5	133051963	133106449	rs3088225	133051568	133051568	0	7.36e-40	30.7411	2.07684	394	Promoter-eGene eQTLs
ENSG00000213585	VDAC1	chr5	133971916	134005133	rs13156291:133343674:C:G	134007983	134007983	0	6.99e-06	-0.319964	0.0702567	-2850	Distal eGene eQTLs
ENSG00000113621	TXNDC15	chr5	134873804	134901525	rs78165052:134250596:C:T	134914906	134914906	0	1.27e-57	7.81073	0.412304	-10000	Distal non-eGene eQTLs
ENSG00000113648	H2AFY	chr5	135333901	135399914	5:134670498:T:TTAAAAA	135334808	135334808	0	5.8e-09	-0.923297	0.155139	65106	Distal eGene eQTLs
ENSG00000132563	REEP2	chr5	138439018	138446969	rs34596904:137787292:CCTCAATGAT:C	138451603	138451612	0	1.18e-09	0.422386	0.0677967	-12586	Distal eGene eQTLs
ENSG00000113657	DPYSL3	chr5	147390812	147510056	rs1121657:146827429:C:A	147447866	147447866	0	5.27e-06	28.9321	6.26739	62190	Distal eGene eQTLs
ENSG00000248647	RP11-331K21.1	chr5	149163956	149276776	rs13153921:148522498:A:G	149142935	149142935	1	2.62e-12	0.491832	0.0681181	133841	Distal eGene eQTLs
ENSG00000248647	RP11-331K21.1	chr5	149163956	149276776	rs5004316:148543691:C:G	149164128	149164128	0	3.57e-35	1.59159	0.116464	112648	Distal eGene eQTLs
ENSG00000169247	SH3TC2	chr5	148923640	149063163	rs10067003:148547490:C:T	149167927	149167927	0	1.85e-14	6.11967	0.769294	-104610	Distal non-eGene eQTLs
ENSG00000173210	ABLIM3	chr5	149141484	149260542	rs70973510:148604794:A:ACCTCTATCTAGTTCC	149225231	149225231	0	9.53e-12	-8.83117	1.25798	-83748	Distal eGene eQTLs
ENSG00000253406	AC012613.2	chr5	149216524	149276805	rs748066	149240972	149240972	0	6.31e-41	3.25193	0.215978	35833	Distal eGene eQTLs
ENSG00000214485	RPL7P1	chr5	150094303	150095048	rs2545339:149911219:A:G	150531657	150531657	0	3.73e-05	-0.152125	0.0364752	-45839	Distal non-eGene eQTLs
ENSG00000197043	ANXA6	chr5	151100713	151157882	rs10039049:150517899:T:C	151138338	151138338	0	4.62e-18	-0.637522	0.0701356	19544	Distal eGene eQTLs
ENSG00000197043	ANXA6	chr5	151100713	151157882	rs1862362:150530679:A:G	151151118	151151118	2	1.94e-05	0.322311	0.0745394	6764	Distal eGene eQTLs
ENSG00000113742	CPEB4	chr5	173888281	173961976	rs10054063:173392398:A:T	173965395	173965395	0	4.55e-07	-6.51327	1.26997	-77115	Distal eGene eQTLs
ENSG00000131446	MGAT1	chr5	180784783	180815652	exm-rs655601	180799673	180799673	0	9.11e-12	-5.93358	0.844373	15979	Distal eGene eQTLs
ENSG00000111837	MAK	chr6	10762724	10838555	rs75580201:10833317:T:G	10833084	10833084	0	2.97e-07	-23.4114	4.49013	5471	Distal eGene eQTLs
ENSG00000229896	RP11-456H18.2	chr6	12007671	12008856	6:12017862:G:A	12017629	12017629	0	1.09e-06	-0.433698	0.0876001	-9959	Distal eGene eQTLs
ENSG00000271888	RP11-560J1.2	chr6	15243924	15245000	rs7771939:15269455:G:A	15269224	15269224	0	9.74e-11	0.233583	0.0351366	-24224	Distal eGene eQTLs
ENSG00000047579	DTNBP1	chr6	15522802	15663058	rs1047631:15523101:T:C	15522870	15522870	0	9.87e-09	3.75561	0.641299	140188	Distal eGene eQTLs
ENSG00000137288	UQCC2	chr6	33694294	33711727	rs113148757:33661059:CCT:C	33693282	33693284	1	6.97e-08	-1.2465	0.226859	18445	Distal eGene eQTLs
ENSG00000137288	UQCC2	chr6	33694294	33711727	rs10672:33662265:T:C	33694488	33694488	0	4.66e-30	-0.765252	0.0617834	17239	Distal eGene eQTLs
ENSG00000272217	XXbac-BPG157A10.21	chr6	33246076	33246856	6:33705072:TCCTGAGAGCACATTCCCACAGCGGTGC:T	33737295	33737322	0	2.43e-05	0.287804	0.0673883	-116930	Distal non-eGene eQTLs
ENSG00000161896	IP6K3	chr6	33721671	33746905	rs487835:33710933:G:A	33743156	33743156	0	9.77e-36	1.01966	0.0738666	3749	Distal eGene eQTLs
ENSG00000124614	RPS10	chr6	34417455	34426125	rs59104690:34352806:CAA:C	34385029	34385031	0	4e-06	0.621141	0.132838	7645	Distal non-eGene eQTLs
ENSG00000196821	C6orf106	chr6	34587289	34696859	rs372746343:34619511:TAA:T	34651734	34651736	0	3.81e-22	0.784882	0.0763779	45125	Distal eGene eQTLs
ENSG00000196821	C6orf106	chr6	34587289	34696859	rs847861:34938809:T:C	34971032	34971032	2	7.56e-06	-0.527587	0.116292	-179017	Distal non-eGene eQTLs
ENSG00000198755	RPL10A	chr6	35468409	35470785	6:35458067:T:TG	35490290	35490290	1	7.61e-09	-1.3124	0.222328	6786	Distal non-eGene eQTLs
ENSG00000007866	TEAD3	chr6	35473598	35497076	rs7744287:35463202:G:T	35495425	35495425	0	3.91e-17	4.25166	0.482751	1651	Promoter-eGene eQTLs
ENSG00000112041	TULP1	chr6	35497875	35512938	exm541395	35511797	35511797	0	4.72e-30	47.5882	3.84254	1141	Promoter-eGene eQTLs
ENSG00000048544	MRPS10	chr6	42206802	42217865	rs60733582:42173975:AAG:A	42206237	42206239	0	8.99e-64	4.13843	0.20331	11628	Distal eGene eQTLs
ENSG00000112619	PRPH2	chr6	42696601	42722574	exm2270317	42691014	42691014	0	1.3e-08	-50.2997	8.66244	31560	Distal eGene eQTLs
ENSG00000024048	UBR2	chr6	42564063	42693504	rs9462817:42671766:A:G	42704028	42704028	0	8.3e-10	2.46516	0.391896	-139966	Distal eGene eQTLs
ENSG00000188107	EYS	chr6	63719981	65707225	rs2812772:66408008:T:C	65698115	65698115	0	2.58e-21	-17.3753	1.73026	9110	Distal eGene eQTLs
ENSG00000156535	CD109	chr6	73695786	73828316	rs487673:74351030:A:G	73641307	73641307	0	1.62e-22	0.486425	0.0468619	-22961	Distal non-eGene eQTLs
ENSG00000196586	MYO6	chr6	75749193	75919537	rs12197455	75988751	75988751	0	0.000100581	5.86124	1.49193	83927	Distal non-eGene eQTLs
ENSG00000135338	LCA5	chr6	79484992	79537458	rs62413381:80278674:G:T	79568957	79568957	0	9.17e-12	7.0049	0.996982	-31499	Distal eGene eQTLs
ENSG00000118402	ELOVL4	chr6	79914813	79947580	rs67926778:80586671:G:T	79876954	79876954	1	3.01e-06	0.391789	0.0827019	70626	Distal eGene eQTLs
ENSG00000234155	RP11-30P6.6	chr6	85387220	85390186	rs9362215:86136433:T:C	85426715	85426715	0	9.2e-19	0.753565	0.0810279	410	Promoter non-eGene eQTLs
ENSG00000146281	PM20D2	chr6	89146051	89165565	rs66688820:89790559:CTTCA:C	89080840	89080844	0	6.44e-12	-0.524504	0.0740673	-173	Promoter non-eGene eQTLs
ENSG00000112182	BACH2	chr6	89926530	90296908	rs140777868:90089369:C:T	89379650	89379650	0	2.56e-05	1.89891	0.44585	32620	Distal non-eGene eQTLs
ENSG00000025039	RRAGD	chr6	89364637	89412270	rs854922:90121950:G:A	89412231	89412231	1	2.37e-05	-0.542497	0.126837	39	Promoter-eGene eQTLs
ENSG00000118507	AKAP7	chr6	131135667	131283535	rs58646840:131261464:C:T	130940324	130940324	0	3.21e-15	1.63423	0.199212	122998	Distal non-eGene eQTLs
ENSG00000237499	RP11-356I2.4	chr6	137823674	137868233	rs10499198:138266431:C:T	137945294	137945294	0	1.1e-28	-2.10532	0.174963	72	Promoter non-eGene eQTLs
ENSG00000112031	MTRF1L	chr6	152987363	153002685	rs9384062:153313148:C:T	152992013	152992013	0	3.06e-41	-3.61102	0.238643	10672	Distal eGene eQTLs
ENSG00000271551	RP11-230C9.2	chr6	156776361	156778422	rs9397968	156792483	156792483	0	1.2e-07	-0.694847	0.1289	-14061	Distal eGene eQTLs
ENSG00000130338	TULP4	chr6	158232237	158511828	rs262820:158663101:G:T	158242069	158242069	0	1.17e-37	-0.821157	0.0575363	-9833	Distal eGene eQTLs
ENSG00000249852	AC145676.2	chr7	227555	229557	rs62430332:229248:T:G	229248	229248	0	1.35e-05	-0.32223	0.0731267	309	Promoter-eGene eQTLs
ENSG00000188191	PRKAR1B	chr7	549198	727650	rs73032421:784718:T:G	745081	745081	0	2.99e-07	1.46705	0.281457	-17431	Distal eGene eQTLs
ENSG00000136261	BZW2	chr7	16646132	16706523	rs706029:16702107:G:C	16662482	16662482	0	1.92e-17	-9.71526	1.09139	-16351	Distal eGene eQTLs
ENSG00000106524	ANKMY2	chr7	16599777	16645817	NHGRI_notinECorHUNT_chr7_16707861	16668236	16668236	2	1.63e-05	0.911719	0.208945	-62044	Distal eGene eQTLs
ENSG00000214870	AC004540.5	chr7	26398594	26494256	rs1238010:26438728:T:G	26399108	26399108	0	5.5e-12	-0.984244	0.138511	-515	Promoter-eGene eQTLs
ENSG00000280255	RP5-1007F24.1	chr7	26538379	26541048	rs1013688	26399711	26399711	1	1.75e-12	-0.476662	0.0654521	-1118	Promoter non-eGene eQTLs
ENSG00000122548	KIAA0087	chr7	26533122	26538788	rs1229669:26442474:A:T	26402854	26402854	1	3.49e-05	0.294657	0.0703878	-4261	Distal non-eGene eQTLs
ENSG00000122565	CBX3	chr7	26201163	26213356	rs12674232:26449731:G:C	26410111	26410111	0	2.27e-05	11.6535	2.71851	-11518	Distal non-eGene eQTLs
ENSG00000106086	PLEKHA8	chr7	30027405	30130483	rs10275475	30028010	30028010	0	3.13e-07	2.66459	0.512075	-606	Promoter-eGene eQTLs
ENSG00000106080	FKBP14	chr7	30010588	30026684	rs10260418:30068028:G:A	30028412	30028412	0	1.24e-07	-1.41499	0.26276	-1728	Promoter-eGene eQTLs
ENSG00000106636	YKT6	chr7	44200969	44214294	rs77888691:44231570:T:G	44191971	44191971	0	3.12e-07	2.37134	0.455691	8997	Distal eGene eQTLs
ENSG00000058404	CAMK2B	chr7	44217151	44334577	rs62459094:44263869:C:A	44224270	44224270	0	2.53e-05	-3.8078	0.893552	110307	Distal eGene eQTLs
ENSG00000132437	DDC	chr7	50458437	50565457	rs3807563:50566390:C:T	50498692	50498692	0	6.22e-08	-12.873	2.33361	66765	Distal eGene eQTLs
ENSG00000106070	GRB10	chr7	50590064	50793462	rs148669951:50586781:C:T	50519083	50519083	0	5.2e-06	39.4414	8.53837	12676	Distal non-eGene eQTLs
ENSG00000225718	RP11-3P22.2	chr7	69224697	69430923	rs10276060:68755554:T:G	69290568	69290568	1	7.01e-05	-0.449402	0.111843	140355	Distal eGene eQTLs
ENSG00000225718	RP11-3P22.2	chr7	69224697	69430923	rs4236234:68892309:A:G	69427323	69427323	0	1.62e-05	-0.342034	0.0783615	3600	Distal eGene eQTLs
ENSG00000170027	YWHAG	chr7	76326795	76359031	rs2868369:76008122:A:G	76378805	76378805	0	3.92e-05	-13.289	3.19565	-19774	Distal eGene eQTLs
ENSG00000214293	APTR	chr7	77657661	77696265	rs4727461:77320388:G:A	77691071	77691071	1	2.49e-09	-0.421585	0.0691083	5194	Distal eGene eQTLs
ENSG00000214293	APTR	chr7	77657661	77696265	rs34370301:77321144:G:A	77691827	77691827	0	1.75e-32	-1.21095	0.0931583	4438	Distal eGene eQTLs
ENSG00000127928	GNGT1	chr7	93591574	93911265	rs59805398:93521261:G:C	93891949	93891949	0	4.21e-09	-53.1146	8.83983	-300376	Distal eGene eQTLs
ENSG00000105825	TFPI2	chr7	93885398	93890991	rs59805398:93521261:G:C	93891949	93891949	0	7.95e-13	-10.1493	1.37112	-958	Promoter-eGene eQTLs
ENSG00000225329	LHFPL3-AS2	chr7	104894629	104926645	rs11561931:104524092:G:A	104883645	104883645	0	1.64e-14	0.54757	0.0686848	43000	Distal eGene eQTLs
ENSG00000106348	IMPDH1	chr7	128392278	128410252	rs144398561:128048075:A:AT	128408021	128408021	0	2.36e-12	-0.894262	0.123571	2231	Promoter-eGene eQTLs
ENSG00000273489	RP11-180C16.1	chr7	131493965	131497694	rs112350050:131197667:C:T	131512908	131512908	1	2.2e-05	-0.525302	0.122327	7229	Distal non-eGene eQTLs
ENSG00000122778	KIAA1549	chr7	138831382	138981318	rs79520825:138615432:A:G	138930686	138930686	0	7.75e-15	0.996714	0.123371	50632	Distal eGene eQTLs
ENSG00000122778	KIAA1549	chr7	138831382	138981318	rs540649:138639832:C:A	138955086	138955086	1	2.09e-11	-0.548816	0.0795807	26232	Distal eGene eQTLs
ENSG00000122778	KIAA1549	chr7	138831382	138981318	rs6977460	138983042	138983042	2	2.56e-07	-0.410763	0.0783435	-1724	Promoter-eGene eQTLs
ENSG00000106462	EZH2	chr7	148807384	148884321	rs243523:148419484:A:C	148722392	148722392	0	9.67e-06	0.865085	0.193025	-24478	Distal non-eGene eQTLs
ENSG00000055118	KCNH2	chr7	150944962	150978315	rs3807370	150976226	150976226	0	2.3e-05	-1.57698	0.36808	2089	Promoter-eGene eQTLs
ENSG00000126870	WDR60	chr7	158856579	158956747	rs842694:158660977:G:T	158868286	158868286	0	3.71e-41	-1.00499	0.0665043	-11708	Distal eGene eQTLs
ENSG00000183638	RP1L1	chr8	10606350	10712187	rs4841407	10658675	10658675	0	7.3e-21	-28.6267	2.88777	53512	Distal eGene eQTLs
ENSG00000254093	PINX1	chr8	10764964	10839884	rs4841408:10516336:A:G	10658826	10658826	0	1.12e-09	0.558216	0.0894787	53361	Distal non-eGene eQTLs
ENSG00000250305	KIAA1456	chr8	12945643	13031503	rs2977106:12793459:G:T	12935950	12935950	2	1.69e-05	0.420948	0.0966477	9692	Distal eGene eQTLs
ENSG00000251468	RP11-369K16.1	chr8	12958388	12962200	rs7830329:12834768:T:G	12977259	12977259	0	7.77e-29	0.7706	0.0638335	-18872	Distal eGene eQTLs
ENSG00000198791	CNOT7	chr8	17224965	17246878	rs2904699:17090798:G:A	17233289	17233289	0	2.39e-05	-3.32344	0.777396	13589	Distal eGene eQTLs
ENSG00000104219	ZDHHC2	chr8	17156030	17224799	rs10095374:17117930:G:T	17260421	17260421	0	8.63e-09	-7.10889	1.20892	-13850	Distal non-eGene eQTLs
ENSG00000003989	SLC7A2	chr8	17497089	17570573	rs2588228:17390525:T:G	17533016	17533016	0	4.46e-14	0.569418	0.0727401	-35928	Distal eGene eQTLs
ENSG00000129422	MTUS1	chr8	17643796	17800917	rs73206294:17613761:G:C	17756252	17756252	2	9.01e-06	0.505211	0.112327	44665	Distal eGene eQTLs
ENSG00000129422	MTUS1	chr8	17643796	17800917	rs2134310:17647914:C:G	17790405	17790405	0	1.36e-07	0.520168	0.0969138	10512	Distal eGene eQTLs
ENSG00000120910	PPP3CC	chr8	22440820	22541142	rs60918318:22296988:CT:C	22439475	22439476	0	1.59e-22	-5.25804	0.506436	1344	Promoter-eGene eQTLs
ENSG00000171316	CHD7	chr8	60678779	60868028	rs62526522:61725393:G:C	60812834	60812834	0	4.8e-05	-5.31876	1.29403	-134056	Distal eGene eQTLs
ENSG00000164683	HEY1	chr8	79764011	79767863	rs34908025:80940829:T:C	80028594	80028594	0	8.01e-06	-1.86396	0.41202	1695	Promoter non-eGene eQTLs
ENSG00000147614	ATP6V0D2	chr8	85987324	86154228	rs1483771:87015506:T:A	86003277	86003277	1	5.7e-05	-0.453486	0.111462	-15954	Distal eGene eQTLs
ENSG00000164879	CA3	chr8	85373437	85449040	rs141812438:87021054:T:C	86008825	86008825	1	2.58e-05	0.916796	0.215345	-21502	Distal non-eGene eQTLs
ENSG00000147614	ATP6V0D2	chr8	85987324	86154228	rs10096162:87031502:C:G	86019273	86019273	0	3.89e-05	-0.294998	0.0709097	-31950	Distal eGene eQTLs
ENSG00000147613	PSKH2	chr8	86048374	86088621	rs285402:87041727:T:C	86029498	86029498	0	4.41e-07	0.412523	0.0803356	-42175	Distal non-eGene eQTLs
ENSG00000164938	TP53INP1	chr8	94925973	94949411	rs1320164:95960767:G:A	94948539	94948539	0	1.47e-05	3.97014	0.9049	872	Promoter-eGene eQTLs
ENSG00000175305	CCNE2	chr8	94879771	94896678	rs493506:95965135:G:T	94952907	94952907	0	2.2e-05	-0.443947	0.103391	-57140	Distal non-eGene eQTLs
ENSG00000156170	NDUFAF6	chr8	94895768	95116455	rs4582532:95969257:G:A	94957029	94957029	0	4.82e-06	0.547812	0.118178	-61262	Distal eGene eQTLs
ENSG00000175895	PLEKHF2	chr8	95133805	95156684	rs145057604:96150785:C:CTTTT	95138557	95138557	0	1.45e-06	-2.00638	0.410182	-4753	Distal eGene eQTLs
ENSG00000104341	LAPTM4B	chr8	97775058	97853013	rs2449556:98812563:A:G	97800335	97800335	0	1.86e-06	-17.8516	3.68842	-25278	Distal eGene eQTLs
ENSG00000253320	AZIN1-AS1	chr8	102864301	102977876	rs2513877:103883630:G:A	102871402	102871402	0	1.34e-06	-0.310166	0.0631863	-7102	Distal eGene eQTLs
ENSG00000176853	FAM91A1	chr8	123768457	123815452	rs7840837:124706629:G:A	123694389	123694389	0	7.95e-14	-4.67342	0.603487	43018	Distal non-eGene eQTLs
ENSG00000104419	NDRG1	chr8	133237172	133302022	rs35692644:134291283:C:T	133279040	133279040	0	1.86e-18	-36.9777	4.01536	22982	Distal eGene eQTLs
ENSG00000066827	ZFAT	chr8	134477789	134713049	rs10093821:134536152:G:A	133523909	133523909	0	7.54e-17	18.1563	2.08242	-8403	Distal non-eGene eQTLs
ENSG00000168263	KCNV2	chr9	2717503	2730037	rs10812470:2690701:C:G	2690701	2690701	0	5.39e-07	22.511	4.41853	26801	Distal eGene eQTLs
ENSG00000080608	PUM3	chr9	2720470	2844241	rs10967968:2760272:C:A	2760272	2760272	0	2.88e-08	0.547699	0.0967537	83969	Distal eGene eQTLs
ENSG00000137074	APTX	chr9	32972607	33025168	9:33051124:AAAAAAAAAATAAAAAT:A	33051126	33051142	0	4.82e-11	-0.885562	0.130959	-25958	Distal eGene eQTLs
ENSG00000198853	RUSC2	chr9	35490128	35561898	rs12338773	35559908	35559908	0	1.78e-05	1.41587	0.325994	-69781	Distal eGene eQTLs
ENSG00000119139	TJP2	chr9	69121265	69255208	rs7850573:71747260:G:A	69132344	69132344	0	9.67e-27	0.714319	0.0619794	-11080	Distal eGene eQTLs
ENSG00000119139	TJP2	chr9	69121265	69255208	exm753538	69205232	69205232	1	3.74e-05	-0.728439	0.174701	-83968	Distal eGene eQTLs
ENSG00000106829	TLE4	chr9	79571774	79726882	rs4492450:82294943:T:C	79680028	79680028	0	1.16e-09	-1.83463	0.294329	-108255	Distal eGene eQTLs
ENSG00000130956	HABP4	chr9	96450202	96491336	rs728210:100175478:G:C	97413196	97413196	1	4.77e-05	-0.324156	0.0788417	-1246	Promoter non-eGene eQTLs
ENSG00000136842	TMOD1	chr9	97501181	97601748	9:100184677:C:CA	97422395	97422395	0	2.93e-05	-2.91872	0.69036	-26283	Distal non-eGene eQTLs
ENSG00000106701	FSD1L	chr9	105447797	105552433	rs62575094:108210212:A:C	105447931	105447931	0	3.46e-08	-7.42518	1.31976	-135	Promoter-eGene eQTLs
ENSG00000165185	KIAA1958	chr9	112486848	112669397	rs35308071:115334174:CT:C	112571894	112571895	0	2.08e-07	0.365924	0.0692529	-85047	Distal eGene eQTLs
ENSG00000148218	ALAD	chr9	113386318	113401333	rs11791027:116105154:A:T	113342874	113342874	2	6.21e-06	0.379234	0.0827988	-2576	Distal non-eGene eQTLs
ENSG00000119411	BSPRY	chr9	113349542	113371233	rs34749539:116110744:C:G	113348464	113348464	0	8.23e-10	2.78459	0.442587	1077	Promoter-eGene eQTLs
ENSG00000095397	WHRN	chr9	114402081	114505450	rs731421:117176949:C:T	114414669	114414669	0	5.96e-13	0.573038	0.0769635	90781	Distal eGene eQTLs
ENSG00000136869	TLR4	chr9	117704333	117716871	rs72616620:120481729:T:C	117719451	117719451	1	1.66e-06	0.620993	0.127681	-15119	Distal eGene eQTLs
ENSG00000106780	MEGF9	chr9	120600814	120714470	rs138399234:123484589:T:C	120722311	120722311	0	1.29e-05	36.4724	8.25821	-7841	Distal eGene eQTLs
ENSG00000056558	TRAF1	chr9	120902394	120929173	9:123646039:CAAAA:C	120883761	120883765	0	1.38e-17	0.911501	0.101891	45412	Distal eGene eQTLs
ENSG00000056558	TRAF1	chr9	120902394	120929173	rs3761849:123690957:C:T	120928679	120928679	1	2.07e-08	0.422961	0.0739284	494	Promoter-eGene eQTLs
ENSG00000148175	STOM	chr9	121338989	121370304	rs142100064:124476982:G:A	121714703	121714703	0	2.36e-05	7.14801	1.67101	-147646	Distal non-eGene eQTLs
ENSG00000119408	NEK6	chr9	124257607	124353307	rs118115812:126153516:C:T	123391237	123391237	0	3.69e-06	5.44688	1.16055	-35067	Distal non-eGene eQTLs
ENSG00000224020	MIR181A2HG	chr9	124658468	124698631	rs4836986:127408059:C:T	124645780	124645780	0	3.2e-37	-1.14488	0.0808187	12687	Distal eGene eQTLs
ENSG00000165219	GAPVD1	chr9	125261795	125367207	rs1874943:128123334:G:A	125361055	125361055	0	2.49e-18	4.30648	0.469584	-99261	Distal eGene eQTLs
ENSG00000187024	PTRH1	chr9	127692979	127724873	rs1573178	127610208	127610208	0	1.51e-11	-0.131526	0.0189312	-30838	Distal non-eGene eQTLs
ENSG00000136908	DPM2	chr9	127935100	127938484	rs62585306:130717961:G:A	127955682	127955682	0	5.34e-06	1.03994	0.225413	-17198	Distal eGene eQTLs
ENSG00000106976	DNM1	chr9	128191656	128255248	rs3003597:130977520:C:G	128215241	128215241	0	1.34e-08	-6.63002	1.14299	-23586	Distal eGene eQTLs
ENSG00000136802	LRRC8A	chr9	128882113	128918039	rs74992270:132229352:C:T	129467073	129467073	0	1.15e-05	9.0469	2.03643	-28857	Distal non-eGene eQTLs
ENSG00000130723	PRRC2B	chr9	131394094	131500197	rs2994040	131415511	131415511	0	1.22e-27	24.9054	2.11755	-21418	Distal eGene eQTLs
ENSG00000196363	WDR5	chr9	134135366	134159968	rs4358859:136992903:C:T	134127781	134127781	0	3.35e-05	0.554183	0.132083	7584	Distal eGene eQTLs
ENSG00000165661	QSOX2	chr9	136206334	136245841	rs35244336:139141908:C:A	136250062	136250062	0	1.48e-13	-1.89386	0.247476	-4221	Distal eGene eQTLs
ENSG00000262075	DKFZP434A062	chr9	136322304	136327323	rs28595751:139224736:T:C	136330280	136330280	0	7.61e-18	14.5528	1.61263	-2957	Distal eGene eQTLs
ENSG00000130653	PNPLA7	chr9	137459954	137550534	rs928046:140487108:T:C	137592656	137592656	0	1.7e-29	2.38535	0.194852	-2166	Promoter non-eGene eQTLs
