# Supplementary material for: QTL mapping of human retina DNA methylation identifies 87 gene-epigenome interactions in age-related macular degeneration
Source: Nat Commun. 2024 Mar 4;15:1972. doi: 10.1038/s41467-024-46063-8 (PMC10912779; doi:10.1038/s41467-024-46063-8)
Supplement: Supplementary file 35 — Supplementary Data 32 [file 41467_2024_46063_MOESM35_ESM.xlsx]

## Sheet: CRE
Gene_ID	CpG	Gene_symbol	Chr	beta	se	p.value	FDR	Distance	Correlation	Biotype	TSS-variant_Distance	Type
ENSG00000116786	cg11141156	PLEKHM2	chr1	14.8929	0.826699	1.01e-32	3.1e-31	759528	Positive	protein_coding	-1032000	Distal non-target gene eQTMs
ENSG00000204186	cg23270712	ZDBF2	chr2	-22.8885	2.06277	5.7e-15	2.61e-14	789679	Negative	protein_coding	-939191	Distal non-target gene eQTMs
ENSG00000172264	cg05610000	MACROD2	chr20	-1.95207	0.380823	0.00082063	0.00129281	-920138	Negative	protein_coding	-920138	Distal target gene eQTMs
ENSG00000270171	cg25763306	RP11-338N10.1	chr1	-3.61837	0.332374	2.38e-14	1.03e-13	-11968	Negative	lincRNA	-895832	Distal non-target gene eQTMs
ENSG00000021645	cg01336268	NRXN3	chr14	29.7576	4.02422	1.3e-06	2.71e-06	-666654	Positive	protein_coding	-666654	Distal target gene eQTMs
ENSG00000164307	cg05506147	ERAP1	chr5	-8.75262	1.45225	2.41e-05	4.44e-05	-146396	Negative	protein_coding	-652413	Distal non-target gene eQTMs
ENSG00000120333	cg12530192	MRPS14	chr1	-4.09118	0.288354	2.18e-23	2.37e-22	-218809	Negative	protein_coding	-632570	Distal non-target gene eQTMs
ENSG00000185278	cg12530192	ZBTB37	chr1	-31.8801	2.23085	2.57e-23	2.78e-22	-923898	Positive	protein_coding	-632570	Distal non-target gene eQTMs
ENSG00000135298	cg17510742	ADGRB3	chr6	-3.88954	0.660205	6.87e-05	0.00012107	-597067	Negative	protein_coding	-596982	Distal target gene eQTMs
ENSG00000162989	cg18311633	KCNJ3	chr2	2.30113	0.416525	3.55e-05	6.44e-05	244828	Negative	protein_coding	-581114	Distal non-target gene eQTMs
ENSG00000135314	cg08720478	KHDC1	chr6	-0.640072	0.0769887	6.95e-10	1.97e-09	-60238	Negative	protein_coding	-559284	Distal non-target gene eQTMs
ENSG00000225329	cg14205632	LHFPL3-AS2	chr7	-1.4809	0.208343	6.52e-08	1.54e-07	-10957	Negative	processed_transcript	-555015	Distal non-target gene eQTMs
ENSG00000226869	cg14205632	LHFPL3-AS1	chr7	-0.833703	0.191201	0.0150082	0.0202791	145074	Negative	processed_transcript	-555015	Distal non-target gene eQTMs
ENSG00000228393	cg10509076	LINC01004	chr7	-0.55889	0.107127	0.00076523	0.00121031	-87305	Negative	antisense	-534354	Distal non-target gene eQTMs
ENSG00000128951	cg20869673	DUT	chr15	-4.54531	0.615413	1.4e-08	3.52e-08	613084	Negative	protein_coding	-533826	Distal non-target gene eQTMs
ENSG00000170871	cg16334072	KIAA0232	chr4	-41.2064	4.95597	8.55e-09	2.19e-08	-938461	Negative	protein_coding	-527298	Distal non-target gene eQTMs
ENSG00000163848	cg10338082	ZNF148	chr3	-6.15226	1.37326	0.00978795	0.0135622	-640853	Negative	protein_coding	-504685	Distal non-target gene eQTMs
ENSG00000233290	cg04226724	RP11-147G16.1	chr1	16.9953	1.32781	3.28e-20	2.55e-19	-409449	Positive	lincRNA	-496804	Distal non-target gene eQTMs
ENSG00000272168	cg10558740	CASC15	chr6	-6.0395	0.871576	2.79e-06	5.63e-06	-484324	Negative	lincRNA	-483737	Distal target gene eQTMs
ENSG00000164808	cg18923221	SPIDR	chr8	-4.44885	0.547832	1.76e-09	4.82e-09	-477590	Negative	protein_coding	-477590	Distal target gene eQTMs
ENSG00000234807	cg23656542	LINC01135	chr1	1.06344	0.0615048	8.94e-26	1.27e-24	-974712	Positive	lincRNA	-463202	Distal non-target gene eQTMs
ENSG00000105173	cg08627047	CCNE1	chr19	-0.875774	0.199345	0.00800365	0.0112217	-870406	Negative	protein_coding	-454107	Distal non-target gene eQTMs
ENSG00000154229	cg17041776	PRKCA	chr17	20.3215	2.45715	4.98e-09	1.31e-08	-451212	Positive	protein_coding	-451189	Distal target gene eQTMs
ENSG00000257261	cg07102229	RP11-96H19.1	chr12	0.42332	0.049375	4.34e-10	1.25e-09	-442523	Positive	lincRNA	-442496	Distal target gene eQTMs
ENSG00000109929	cg16730369	SC5D	chr11	18.6405	1.38517	3.7e-21	3.15e-20	339815	Positive	protein_coding	-441107	Distal non-target gene eQTMs
ENSG00000273173	cg17489502	SNURF	chr15	-1.58374	0.138905	2.07e-16	1.09e-15	-461780	Positive	protein_coding	-438183	Distal non-target gene eQTMs
ENSG00000280234	cg17489502	RP11-145P16.2	chr15	-0.43691	0.0567601	1.8e-08	4.48e-08	-161187	Negative	TEC	-438183	Distal non-target gene eQTMs
ENSG00000065883	cg05881648	CDK13	chr7	15.7854	3.78344	0.0144584	0.0195768	535512	Positive	protein_coding	-436611	Distal non-target gene eQTMs
ENSG00000107863	cg05217312	ARHGAP21	chr10	-73.7698	8.00873	8.35e-11	2.56e-10	-454711	Negative	protein_coding	-434152	Distal non-target gene eQTMs
ENSG00000101654	cg06883868	RNMT	chr18	-35.2353	3.47714	2.75e-13	1.07e-12	83143	Positive	protein_coding	-426019	Distal non-target gene eQTMs
ENSG00000272746	cg06883868	RP11-53B2.6	chr18	-0.560531	0.0771834	1.53e-06	3.17e-06	-117439	Negative	sense_intronic	-426019	Distal non-target gene eQTMs
ENSG00000082805	cg02685365	ERC1	chr12	5.63163	0.726565	5.98e-08	1.42e-07	-1392294	Negative	protein_coding	-412017	Distal non-target gene eQTMs
ENSG00000183054	cg16258445	RGPD6	chr2	76.9519	5.53868	5.3e-22	4.98e-21	608629	Positive	protein_coding	-389868	Distal non-target gene eQTMs
ENSG00000257879	cg26537563	RP11-90C1.1	chr12	-6.15582	0.601821	1.25e-14	5.55e-14	-741802	Negative	lincRNA	-360383	Distal non-target gene eQTMs
ENSG00000242268	cg11822543	RP11-368I23.2	chr3	0.411355	0.0601657	4.52e-05	8.1e-05	320589	Positive	lincRNA	-332083	Distal non-target gene eQTMs
ENSG00000248932	cg11413581	RP11-319G6.1	chr3	4.12506	0.144172	6.81e-50	2.92e-47	60193	Negative	antisense	-323762	Distal non-target gene eQTMs
ENSG00000250543	cg11413581	RP11-442N1.1	chr3	-9.18997	0.773229	3.18e-17	1.82e-16	-358835	Negative	lincRNA	-323762	Distal non-target gene eQTMs
ENSG00000172179	cg22042833	PRL	chr6	-5.60902	0.867273	9.03e-07	1.91e-06	-299625	Negative	protein_coding	-322847	Distal non-target gene eQTMs
ENSG00000150991	cg04097082	UBC	chr12	219.518	28.8943	7.67e-07	1.64e-06	-616097	Positive	protein_coding	-322266	Distal non-target gene eQTMs
ENSG00000231185	cg00186464	AC005592.2	chr5	-0.845167	0.0815092	1.83e-13	7.25e-13	-319757	Negative	antisense	-319757	Distal target gene eQTMs
ENSG00000174574	cg16181943	AKIRIN1	chr1	-5.42163	0.585192	1.55e-11	5.1e-11	-404237	Negative	protein_coding	-314197	Distal non-target gene eQTMs
ENSG00000005100	cg20792590	DHX33	chr17	-4.17867	0.721393	0.00021532	0.00036002	638528	Negative	protein_coding	-307211	Distal non-target gene eQTMs
ENSG00000119242	cg25098479	CCDC92	chr12	-20.4722	1.2012	4.5e-27	7.43e-26	360594	Negative	protein_coding	-306013	Distal non-target gene eQTMs
ENSG00000179195	cg25098479	ZNF664	chr12	33.9483	3.47069	4.84e-12	1.67e-11	-307409	Positive	protein_coding	-306013	Distal non-target gene eQTMs
ENSG00000113361	cg11661477	CDH6	chr5	-3.39185	0.301115	1.17e-15	5.76e-15	-749596	Negative	protein_coding	-303872	Distal non-target gene eQTMs
ENSG00000158560	cg09731958	DYNC1I1	chr7	-7.51278	1.85698	0.0277025	0.0361906	-303145	Negative	protein_coding	-303145	Distal target gene eQTMs
ENSG00000104324	cg04026948	CPQ	chr8	-3.92423	0.484606	9.29e-08	2.16e-07	-295860	Positive	protein_coding	-295875	Distal target gene eQTMs
ENSG00000213057	cg07881152	C1orf220	chr1	-2.84648	0.255905	5.63e-15	2.58e-14	153708	Negative	lincRNA	-294903	Distal non-target gene eQTMs
ENSG00000236283	cg01975548	AC013463.2	chr2	0.293263	0.0286783	1.68e-13	6.68e-13	-363468	Positive	antisense	-291817	Distal target gene eQTMs
ENSG00000274810	cg01058342	NPHP3-ACAD11	chr3	-3.41635	0.211335	2.43e-27	4.11e-26	771320	Negative	protein_coding	-291071	Distal non-target gene eQTMs
ENSG00000188573	cg08577341	FBLL1	chr5	1.30335	0.090153	1.36e-22	1.36e-21	954998	Positive	protein_coding	-289319	Distal non-target gene eQTMs
ENSG00000253861	cg25161425	SLC2A3P1	chr5	-4.48808	0.306358	1.97e-23	2.16e-22	-978306	Negative	processed_pseudogene	-289172	Distal non-target gene eQTMs
ENSG00000145934	cg21188154	TENM2	chr5	9.72272	1.04187	1.07e-11	3.59e-11	-288883	Positive	protein_coding	-288883	Distal target gene eQTMs
ENSG00000164934	cg18421074	DCAF13	chr8	-4.05758	0.460324	8.03e-11	2.47e-10	-349759	Negative	protein_coding	-263725	Distal non-target gene eQTMs
ENSG00000023697	cg00564190	DERA	chr12	-9.65622	0.765951	1.19e-19	8.74e-19	-695273	Positive	protein_coding	-259433	Distal non-target gene eQTMs
ENSG00000023734	cg00564190	STRAP	chr12	-13.6954	1.73152	5.56e-09	1.45e-08	-724188	Positive	protein_coding	-259433	Distal non-target gene eQTMs
ENSG00000176435	cg13388068	CLEC14A	chr14	0.612245	0.0939525	0.00020259	0.00033956	-801248	Positive	protein_coding	-254942	Distal non-target gene eQTMs
ENSG00000267251	cg08132483	AC139100.3	chr18	0.365577	0.045161	3e-06	6.03e-06	862523	Positive	antisense	-251872	Distal non-target gene eQTMs
ENSG00000078053	cg07644884	AMPH	chr7	23.8912	4.96915	0.00219785	0.0033009	-462584	Positive	protein_coding	-237277	Distal non-target gene eQTMs
ENSG00000073331	cg26796245	ALPK1	chr4	-3.75067	0.707514	0.00626267	0.0089101	-764155	Negative	protein_coding	-231555	Distal non-target gene eQTMs
ENSG00000170775	cg09011504	GPR37	chr7	27.1031	3.84952	6.19e-08	1.47e-07	-482340	Negative	protein_coding	-231452	Distal non-target gene eQTMs
ENSG00000160285	cg02571448	LSS	chr21	-33.5011	5.06046	0.00360782	0.00528087	-313293	Negative	protein_coding	-231154	Distal non-target gene eQTMs
ENSG00000104064	cg09819222	GABPB1	chr15	-11.4777	0.420241	1.17e-49	4.9e-47	992388	Positive	protein_coding	-230292	Distal non-target gene eQTMs
ENSG00000244879	cg09819222	GABPB1-AS1	chr15	-23.6304	2.32148	1.71e-13	6.79e-13	-912821	Negative	antisense	-230292	Distal non-target gene eQTMs
ENSG00000117450	cg27223543	PRDX1	chr1	-42.5857	2.89533	1.03e-23	1.17e-22	-878583	Negative	protein_coding	-227259	Distal non-target gene eQTMs
ENSG00000150995	cg19885037	ITPR1	chr3	-2.23429	0.544268	0.0208032	0.0275646	-227213	Positive	protein_coding	-227210	Distal target gene eQTMs
ENSG00000117408	cg13864586	IPO13	chr1	34.7514	3.33768	5.89e-14	2.45e-13	-685340	Negative	protein_coding	-227096	Distal non-target gene eQTMs
ENSG00000225718	cg21557473	RP11-3P22.2	chr7	-1.0265	0.261477	0.0196318	0.0260793	638059	Negative	lincRNA	-225961	Distal non-target gene eQTMs
ENSG00000276517	cg23829772	AL133243.2	chr2	-0.399446	0.0640591	1.25e-05	2.37e-05	-54509	Negative	sense_intronic	-223985	Distal non-target gene eQTMs
ENSG00000234608	cg18629535	MAPKAPK5-AS1	chr12	-2.8664	0.314795	5.3e-11	1.66e-10	951793	Negative	lincRNA	-221177	Distal non-target gene eQTMs
ENSG00000229186	cg01573562	ADAM1A	chr12	-2.86222	0.172301	1.12e-27	1.97e-26	-892251	Negative	unitary_pseudogene	-221134	Distal non-target gene eQTMs
ENSG00000162604	cg25837719	TM2D1	chr1	-3.51654	0.401834	1.26e-10	3.81e-10	-598749	Negative	protein_coding	-217038	Distal non-target gene eQTMs
ENSG00000150712	cg26880493	MTMR12	chr5	-3.48772	0.288925	1.77e-18	1.15e-17	-371915	Negative	protein_coding	-215669	Distal non-target gene eQTMs
ENSG00000151490	cg12601353	PTPRO	chr12	-6.42801	1.56353	0.0253864	0.0333134	-212266	Negative	protein_coding	-212377	Distal target gene eQTMs
ENSG00000176771	cg20838753	NCKAP5	chr2	3.11695	0.31675	1.29e-12	4.72e-12	1652617	Positive	protein_coding	-204422	Distal non-target gene eQTMs
ENSG00000230207	cg13563261	RPL4P5	chr9	0.361418	0.0219274	7.68e-27	1.23e-25	-552083	Positive	processed_pseudogene	-204099	Distal non-target gene eQTMs
ENSG00000141622	cg15651616	RNF165	chr18	-13.0773	1.50757	4.81e-10	1.38e-09	910709	Negative	protein_coding	-203105	Distal non-target gene eQTMs
ENSG00000144290	cg13327466	SLC4A10	chr2	-31.8893	4.35679	6.57e-08	1.55e-07	-200025	Negative	protein_coding	-200025	Distal target gene eQTMs
ENSG00000136718	cg04420083	IMP4	chr2	9.95339	0.74945	5.7e-20	4.31e-19	-692726	Positive	protein_coding	-198035	Distal non-target gene eQTMs
ENSG00000165055	cg01195159	METTL2B	chr7	6.15552	0.709566	7.81e-10	2.2e-09	632395	Positive	protein_coding	-192154	Distal non-target gene eQTMs
ENSG00000086205	cg05982345	FOLH1	chr11	-4.27581	1.1906	0.0149685	0.02023	-975576	Negative	protein_coding	-188958	Distal non-target gene eQTMs
ENSG00000229816	cg08357990	DDX50P1	chr2	-0.341075	0.0270931	1.09e-19	8.03e-19	-932883	Negative	processed_pseudogene	-187511	Distal non-target gene eQTMs
ENSG00000118762	cg10918624	PKD2	chr4	-7.51437	1.3687	0.00055839	0.00089558	-699105	Negative	protein_coding	-185692	Distal non-target gene eQTMs
ENSG00000121064	cg05627498	SCPEP1	chr17	-2.74402	0.170676	6.08e-25	7.86e-24	-462461	Negative	protein_coding	-184715	Distal non-target gene eQTMs
ENSG00000104687	cg23760732	GSR	chr8	-4.47345	0.497786	1.54e-11	5.07e-11	-109356	Negative	protein_coding	-184231	Distal non-target gene eQTMs
ENSG00000049449	cg12911902	RCN1	chr11	-32.3726	7.6625	0.0282169	0.0368078	95145	Negative	protein_coding	-183368	Distal target gene eQTMs
ENSG00000111450	cg10476468	STX2	chr12	-13.7626	1.06253	4.99e-19	3.42e-18	342792	Negative	protein_coding	-178485	Distal non-target gene eQTMs
ENSG00000131943	cg14914220	C19orf12	chr19	2.35441	0.21641	7.76e-15	3.52e-14	707780	Positive	protein_coding	-178376	Distal non-target gene eQTMs
ENSG00000101363	cg10757462	MANBAL	chr20	-5.96645	0.707051	6.42e-09	1.66e-08	805036	Negative	protein_coding	-178266	Distal non-target gene eQTMs
ENSG00000171316	cg12820204	CHD7	chr8	48.4828	10.022	0.00112322	0.00174341	-178009	Negative	protein_coding	-177971	Distal target gene eQTMs
ENSG00000131196	cg22733266	NFATC1	chr18	1.66441	0.158407	7.91e-11	2.43e-10	149308	Positive	protein_coding	-177263	Distal non-target gene eQTMs
ENSG00000259460	cg08660235	RP11-128A17.1	chr15	0.513712	0.0693922	6.37e-08	1.51e-07	343953	Positive	antisense	-175775	Distal non-target gene eQTMs
ENSG00000055070	cg18117094	SZRD1	chr1	-15.1653	1.04835	8.35e-23	8.53e-22	-561319	Negative	protein_coding	-173621	Distal non-target gene eQTMs
ENSG00000268869	cg18117094	ESPNP	chr1	-1.37636	0.150862	1.07e-08	2.72e-08	226555	Negative	transcribed_unprocessed_pseudogene	-173621	Distal non-target gene eQTMs
ENSG00000275481	cg10904405	RP11-474P2.6	chr12	-0.603725	0.0477856	8.22e-20	6.14e-19	-167380	Negative	lincRNA	-172557	Distal non-target gene eQTMs
ENSG00000198642	cg10991751	KLHL9	chr9	27.1324	4.06743	9.92e-07	2.09e-06	645414	Negative	protein_coding	-172449	Distal non-target gene eQTMs
ENSG00000165389	cg23614605	SPTSSA	chr14	18.3877	3.87686	0.00295367	0.00436996	859333	Positive	protein_coding	-169572	Distal non-target gene eQTMs
ENSG00000176399	cg16606671	DMRTA1	chr9	0.438205	0.0928029	0.00215103	0.0032364	475393	Positive	protein_coding	-168795	Distal non-target gene eQTMs
ENSG00000157388	cg14843888	CACNA1D	chr3	-4.04538	0.725661	0.00024305	0.0004044	-167257	Negative	protein_coding	-167257	Distal target gene eQTMs
ENSG00000147481	cg04495993	SNTG1	chr8	0.81673	0.0817934	2.18e-13	8.59e-13	-158510	Positive	protein_coding	-158510	Distal target gene eQTMs
ENSG00000262180	cg22265501	OCLM	chr1	-0.393918	0.0283614	1.85e-23	2.03e-22	-584992	Negative	protein_coding	-157085	Distal non-target gene eQTMs
ENSG00000157181	cg22265501	C1orf27	chr1	-6.10638	0.601885	5.32e-13	2.02e-12	-610200	Negative	protein_coding	-157085	Distal non-target gene eQTMs
ENSG00000228238	cg22265501	GS1-304P7.2	chr1	-0.336471	0.0349296	6.69e-13	2.51e-12	-407759	Negative	processed_pseudogene	-157085	Distal non-target gene eQTMs
ENSG00000171150	cg23104428	SOCS5	chr2	18.2184	2.55585	6.97e-07	1.49e-06	-373540	Positive	protein_coding	-156335	Distal non-target gene eQTMs
ENSG00000111731	cg17056614	C2CD5	chr12	-33.7153	1.92179	4.7e-31	1.2e-29	407609	Positive	protein_coding	-156333	Distal non-target gene eQTMs
ENSG00000229127	cg11421132	AC007038.7	chr2	-0.578456	0.0725607	3.45e-09	9.2e-09	451317	Negative	antisense	-155197	Distal non-target gene eQTMs
ENSG00000183077	cg17112975	AFMID	chr17	-1.26138	0.197566	8.18e-05	0.00014302	751992	Negative	protein_coding	-154756	Distal non-target gene eQTMs
ENSG00000164252	cg01480060	AGGF1	chr5	20.2556	3.21862	7.88e-06	1.53e-05	472159	Positive	protein_coding	-153843	Distal non-target gene eQTMs
ENSG00000099956	cg07312552	SMARCB1	chr22	13.6428	1.02	2.87e-20	2.24e-19	-637069	Negative	protein_coding	-153102	Distal non-target gene eQTMs
ENSG00000100024	cg00108569	UPB1	chr22	1.19513	0.21588	0.0002504	0.00041622	70211	Positive	protein_coding	-152998	Distal non-target gene eQTMs
ENSG00000183655	cg02396967	KLHL25	chr15	1.3796	0.114332	4.26e-18	2.67e-17	473150	Negative	protein_coding	-152503	Distal non-target gene eQTMs
ENSG00000133678	cg15734357	TMEM254	chr10	-5.04554	0.538862	1.87e-12	6.71e-12	858210	Positive	protein_coding	-151401	Distal non-target gene eQTMs
ENSG00000188199	cg15734357	NUTM2B	chr10	1.23507	0.144866	3.79e-06	7.54e-06	482791	Positive	protein_coding	-151401	Distal non-target gene eQTMs
ENSG00000280355	cg15734357	RP11-119F19.5	chr10	-0.663442	0.121742	0.00023778	0.00039607	-461537	Negative	TEC	-151401	Distal non-target gene eQTMs
ENSG00000248672	cg10279072	LY75-CD302	chr2	-0.571788	0.0840384	5.42e-06	1.06e-05	-653010	Negative	protein_coding	-150207	Distal non-target gene eQTMs
ENSG00000006715	cg02351181	VPS41	chr7	-9.39798	1.02382	2.65e-11	8.53e-11	-889199	Positive	protein_coding	-149979	Distal non-target gene eQTMs
ENSG00000115919	cg05058758	KYNU	chr2	-0.398776	0.0794059	0.00287089	0.00425464	-149020	Negative	protein_coding	-149179	Distal target gene eQTMs
ENSG00000130340	cg19897409	SNX9	chr6	-9.20996	1.37424	3.41e-06	6.82e-06	774464	Negative	protein_coding	-148549	Distal non-target gene eQTMs
ENSG00000133805	cg07329251	AMPD3	chr11	-9.78903	1.62373	0.00015763	0.000267	-146802	Negative	protein_coding	-146802	Distal target gene eQTMs
ENSG00000133800	cg07268332	LYVE1	chr11	-0.590141	0.118523	0.0116842	0.0160216	-102019	Positive	protein_coding	-146634	Distal non-target gene eQTMs
ENSG00000115239	cg22215492	ASB3	chr2	-10.8219	1.16154	5.41e-12	1.86e-11	582747	Negative	protein_coding	-144581	Distal non-target gene eQTMs
ENSG00000128604	cg11961845	IRF5	chr7	-0.673079	0.126835	0.00235705	0.00352975	-430881	Negative	protein_coding	-143315	Distal non-target gene eQTMs
ENSG00000110328	cg11734620	GALNT18	chr11	-4.97422	0.497399	7.15e-13	2.68e-12	-820737	Negative	protein_coding	-141827	Distal non-target gene eQTMs
ENSG00000172738	cg13628566	TMEM217	chr6	0.30538	0.0713832	0.0283427	0.0369582	747124	Positive	protein_coding	-139803	Distal non-target gene eQTMs
ENSG00000022355	cg04122788	GABRA1	chr5	8.30535	1.4481	1.5e-05	2.82e-05	161386	Positive	protein_coding	-138614	Distal non-target gene eQTMs
ENSG00000251432	cg07650665	RP11-420A23.1	chr4	-0.281889	0.054299	0.00074313	0.00117662	-134906	Negative	lincRNA	-134906	Distal target gene eQTMs
ENSG00000143702	cg05090186	CEP170	chr1	-7.35779	1.02532	4.46e-07	9.75e-07	927713	Negative	protein_coding	-134739	Distal non-target gene eQTMs
ENSG00000095303	cg18645295	PTGS1	chr9	-2.75201	0.50299	0.00602776	0.0085905	668869	Negative	protein_coding	-134604	Distal non-target gene eQTMs
ENSG00000135587	cg07560817	SMPD2	chr6	1.50737	0.335425	0.00970277	0.0134538	140378	Positive	protein_coding	-134513	Distal non-target gene eQTMs
ENSG00000102543	cg17091793	CDADC1	chr13	-2.22364	0.245777	1.65e-10	4.93e-10	137664	Negative	protein_coding	-134349	Distal non-target gene eQTMs
ENSG00000204977	cg00669363	TRIM13	chr13	-5.01114	0.537079	3.13e-11	9.99e-11	885689	Positive	protein_coding	-134287	Distal non-target gene eQTMs
ENSG00000250486	cg17785786	FAM218A	chr4	-2.53118	0.668752	0.0379901	0.048668	-536566	Negative	protein_coding	-132320	Distal non-target gene eQTMs
ENSG00000279923	cg22946897	CTD-2008E3.1	chr5	0.157593	0.0367343	0.0193349	0.025714	-212026	Positive	TEC	-131189	Distal non-target gene eQTMs
ENSG00000173548	cg16452361	SNX33	chr15	2.6921	0.45867	7.11e-05	0.00012516	-542954	Positive	protein_coding	-131023	Distal non-target gene eQTMs
ENSG00000092529	cg15345552	CAPN3	chr15	-1.66732	0.323088	0.00245187	0.00366488	-345078	Negative	protein_coding	-128919	Distal non-target gene eQTMs
ENSG00000182541	cg18894782	LIMK2	chr22	10.4295	1.20929	4.46e-10	1.28e-09	389741	Positive	protein_coding	-128716	Distal non-target gene eQTMs
ENSG00000124201	cg01053711	ZNFX1	chr20	4.69601	0.559015	5.81e-10	1.66e-09	208695	Positive	protein_coding	-128304	Distal non-target gene eQTMs
ENSG00000172262	cg16986441	ZNF131	chr5	3.94991	0.515217	3.72e-08	9e-08	-127596	Positive	protein_coding	-127596	Distal target gene eQTMs
ENSG00000259495	cg18054026	RP11-210M15.2	chr15	-3.12534	0.543173	0.00013432	0.00022929	789626	Negative	lincRNA	-127446	Distal non-target gene eQTMs
ENSG00000172345	cg14380111	STARD5	chr15	-0.477171	0.0724885	2.8e-06	5.65e-06	-175034	Negative	protein_coding	-126986	Distal non-target gene eQTMs
ENSG00000240747	cg27084712	KRBOX1	chr3	-0.850102	0.129587	3.49e-06	6.97e-06	-126870	Negative	protein_coding	-126870	Distal target gene eQTMs
ENSG00000167676	cg20098875	PLIN4	chr19	-0.918105	0.166732	0.0030608	0.00452085	591179	Negative	protein_coding	-124246	Distal non-target gene eQTMs
ENSG00000108175	cg00600786	ZMIZ1	chr10	-70.6005	4.73504	8.86e-22	8.1e-21	765662	Negative	protein_coding	-124130	Distal non-target gene eQTMs
ENSG00000169247	cg25922157	SH3TC2	chr5	-15.4112	2.60827	3.77e-05	6.82e-05	341099	Negative	protein_coding	-123255	Distal non-target gene eQTMs
ENSG00000168234	cg12972164	TTC39C	chr18	-40.8564	6.28856	8.52e-06	1.64e-05	-122988	Negative	protein_coding	-122988	Distal target gene eQTMs
ENSG00000139915	cg13218787	MDGA2	chr14	1.21808	0.297316	0.00443119	0.00642294	-776278	Positive	protein_coding	-122871	Distal non-target gene eQTMs
ENSG00000260234	cg06822943	RP11-166N6.3	chr3	-0.36323	0.0818746	0.0114899	0.0157787	90026	Negative	protein_coding	-120539	Distal non-target gene eQTMs
ENSG00000161036	cg18882624	LRWD1	chr7	-6.06917	0.417846	4.98e-23	5.23e-22	528969	Negative	protein_coding	-120083	Distal non-target gene eQTMs
ENSG00000160993	cg18882624	ALKBH4	chr7	-1.53754	0.142342	1.08e-14	4.83e-14	-520251	Positive	protein_coding	-120083	Distal non-target gene eQTMs
ENSG00000251455	cg27228042	RP11-164P12.3	chr4	-0.408872	0.0803345	0.00150822	0.00230877	145428	Negative	antisense	-119839	Distal non-target gene eQTMs
ENSG00000178921	cg08014272	PFAS	chr17	8.17619	1.31613	3.25e-05	5.91e-05	411210	Positive	protein_coding	-119054	Distal non-target gene eQTMs
ENSG00000138083	cg10665110	SIX3	chr2	25.8526	1.42277	1.04e-30	2.55e-29	462033	Positive	protein_coding	-117719	Distal non-target gene eQTMs
ENSG00000260244	cg01389445	RP11-588K22.2	chr4	6.84894	1.34537	0.00026146	0.00043383	990494	Positive	sense_overlapping	-117009	Distal non-target gene eQTMs
ENSG00000103353	cg04029168	UBFD1	chr16	-2.59229	0.375475	1.09e-06	2.29e-06	-394496	Negative	protein_coding	-116216	Distal non-target gene eQTMs
ENSG00000186260	cg07056585	MKL2	chr16	-9.99033	1.37094	5.55e-08	1.32e-07	-115519	Negative	protein_coding	-115519	Distal target gene eQTMs
ENSG00000181234	cg05607502	TMEM132C	chr12	6.57688	0.566431	2.55e-16	1.33e-15	-114454	Positive	protein_coding	-114454	Distal target gene eQTMs
ENSG00000279555	cg02881516	RP11-426D19.1	chr17	1.96129	0.203161	2.08e-09	5.65e-09	-92131	Positive	TEC	-114200	Distal non-target gene eQTMs
ENSG00000139874	cg26654382	SSTR1	chr14	0.22435	0.0257086	2.79e-10	8.17e-10	498706	Positive	protein_coding	-113351	Distal non-target gene eQTMs
ENSG00000258484	cg13757194	SPESP1	chr15	-3.0374	0.231163	9.51e-14	3.86e-13	-113214	Negative	protein_coding	-113214	Distal target gene eQTMs
ENSG00000076043	cg25871851	REXO2	chr11	-2.25441	0.301127	4.53e-06	8.96e-06	268132	Negative	protein_coding	-111661	Distal non-target gene eQTMs
ENSG00000101247	cg01497961	NDUFAF5	chr20	-4.39124	0.393143	5.83e-18	3.6e-17	665286	Negative	protein_coding	-110742	Distal non-target gene eQTMs
ENSG00000041353	cg12377874	RAB27B	chr18	-0.87108	0.214802	0.0248802	0.0326833	-110313	Negative	protein_coding	-110313	Distal target gene eQTMs
ENSG00000196954	cg12605068	CASP4	chr11	-1.31561	0.298897	0.0299471	0.0388888	776617	Positive	protein_coding	-109489	Distal non-target gene eQTMs
ENSG00000183960	cg09703620	KCNH8	chr3	-6.0907	0.560354	1.86e-15	8.95e-15	-108008	Negative	protein_coding	-108064	Distal target gene eQTMs
ENSG00000134324	cg23689227	LPIN1	chr2	-16.9873	1.66635	3.54e-13	1.37e-12	-107654	Negative	protein_coding	-107654	Distal target gene eQTMs
ENSG00000145428	cg20818457	RNF175	chr4	-0.636422	0.126716	0.00176499	0.00268313	-451876	Negative	protein_coding	-105907	Distal non-target gene eQTMs
ENSG00000198862	cg26635603	LTN1	chr21	-20.6067	2.21917	5.96e-12	2.04e-11	371426	Positive	protein_coding	-105499	Distal non-target gene eQTMs
ENSG00000156261	cg26635603	CCT8	chr21	-19.6949	2.65169	9.31e-08	2.17e-07	243765	Negative	protein_coding	-105499	Distal non-target gene eQTMs
ENSG00000141198	cg24820781	TOM1L1	chr17	-4.3373	0.378859	1.65e-17	9.75e-17	-173734	Negative	protein_coding	-104394	Distal non-target gene eQTMs
ENSG00000139131	cg19540425	YARS2	chr12	-1.20198	0.12001	2.8e-14	1.2e-13	-224588	Negative	protein_coding	-103373	Distal non-target gene eQTMs
ENSG00000274105	cg19540425	RP11-278C7.3	chr12	-0.285243	0.0314612	2.72e-11	8.75e-11	-225267	Negative	sense_intronic	-103373	Distal non-target gene eQTMs
ENSG00000163629	cg13943333	PTPN13	chr4	-180.842	16.9526	5.34e-15	2.46e-14	-443784	Negative	protein_coding	-103097	Distal non-target gene eQTMs
ENSG00000183199	cg13943333	HSP90AB3P	chr4	0.314906	0.0324121	3.69e-11	1.17e-10	853744	Positive	processed_pseudogene	-103097	Distal non-target gene eQTMs
ENSG00000236714	cg16740022	AC005592.1	chr5	-3.08053	0.611885	0.00144813	0.0022193	289788	Negative	lincRNA	-101148	Distal non-target gene eQTMs
ENSG00000245750	cg03938914	DRAIC	chr15	-44.0819	4.65133	2.58e-11	8.32e-11	-100797	Negative	lincRNA	-100692	Distal target gene eQTMs
ENSG00000130449	cg17599415	ZSWIM6	chr5	-5.72962	1.00157	0.0001175	0.00020187	-100079	Negative	protein_coding	-100064	Distal target gene eQTMs
ENSG00000149557	cg15205743	FEZ1	chr11	18.2305	3.06652	0.00021561	0.00036048	-179109	Positive	protein_coding	-99085	Distal non-target gene eQTMs
ENSG00000168014	cg11913491	C2CD3	chr11	-8.40469	0.924007	7.66e-11	2.36e-10	580142	Negative	protein_coding	-99005	Distal non-target gene eQTMs
ENSG00000124224	cg16473762	PPP4R1L	chr20	-6.68104	0.474492	4.35e-20	3.33e-19	993324	Negative	transcribed_unprocessed_pseudogene	-98883	Distal non-target gene eQTMs
ENSG00000109832	cg12911763	DDX25	chr11	-7.45832	0.601697	1.92e-18	1.25e-17	639909	Negative	protein_coding	-98752	Distal non-target gene eQTMs
ENSG00000187566	cg17110599	NHLRC1	chr6	-1.13399	0.0727841	5.76e-24	6.74e-23	-628552	Negative	protein_coding	-98672	Distal non-target gene eQTMs
ENSG00000139767	cg13099106	SRRM4	chr12	-34.5355	2.09874	1.62e-29	3.44e-28	-1105827	Negative	protein_coding	-97499	Distal non-target gene eQTMs
ENSG00000213144	cg00168205	RP11-64B16.2	chr12	-0.911163	0.206789	0.00865908	0.0120828	-892278	Negative	processed_pseudogene	-97259	Distal non-target gene eQTMs
ENSG00000253767	cg15949044	PCDHGA8	chr5	0.843171	0.121876	9.87e-06	1.89e-05	-94825	Positive	protein_coding	-94825	Distal target gene eQTMs
ENSG00000250132	cg07916784	RP11-359B12.2	chr12	-0.816785	0.121318	1.27e-06	2.65e-06	109274	Negative	antisense	-92898	Distal non-target gene eQTMs
ENSG00000100100	cg14959168	PIK3IP1	chr22	3.27729	0.576081	0.00045697	0.00074034	209674	Positive	protein_coding	-91744	Distal non-target gene eQTMs
ENSG00000273162	cg13999981	RP11-108L7.15	chr10	-0.169809	0.0172298	1.05e-11	3.52e-11	382388	Negative	lincRNA	-88384	Distal non-target gene eQTMs
ENSG00000068724	cg21405109	TTC7A	chr2	-10.6022	1.19836	5.15e-10	1.47e-09	-866809	Negative	protein_coding	-87436	Distal non-target gene eQTMs
ENSG00000095002	cg21405109	MSH2	chr2	14.4288	1.77396	2.6e-09	7e-09	-379997	Negative	protein_coding	-87436	Distal non-target gene eQTMs
ENSG00000138081	cg21405109	FBXO11	chr2	14.7327	2.09339	2.2e-05	4.07e-05	-6350	Positive	protein_coding	-87436	Distal non-target gene eQTMs
ENSG00000233230	cg00620552	AC079807.2	chr2	0.96635	0.088515	5.75e-16	2.91e-15	122720	Negative	antisense	-87428	Distal non-target gene eQTMs
ENSG00000116016	cg10234436	EPAS1	chr2	89.5119	17.1798	0.00101555	0.00158482	-709237	Positive	protein_coding	-86747	Distal non-target gene eQTMs
ENSG00000146555	cg20884522	SDK1	chr7	-10.0323	0.571514	1.88e-27	3.24e-26	537921	Negative	protein_coding	-83809	Distal non-target gene eQTMs
ENSG00000157911	cg05753589	PEX10	chr1	7.68112	0.415494	8.74e-28	1.55e-26	-270638	Positive	protein_coding	-82856	Distal non-target gene eQTMs
ENSG00000248333	cg05753589	CDK11B	chr1	11.7894	0.673295	8.57e-26	1.22e-24	498099	Negative	protein_coding	-82856	Distal non-target gene eQTMs
ENSG00000162576	cg05753589	MXRA8	chr1	6.47753	0.439495	5.21e-19	3.57e-18	780637	Positive	protein_coding	-82856	Distal non-target gene eQTMs
ENSG00000179403	cg05753589	VWA1	chr1	11.844	0.9708	8.58e-12	2.9e-11	-698465	Negative	protein_coding	-82856	Distal non-target gene eQTMs
ENSG00000142606	cg05753589	MMEL1	chr1	0.59279	0.057884	8.5e-11	2.61e-10	-457313	Positive	protein_coding	-82856	Distal non-target gene eQTMs
ENSG00000277232	cg04143828	GTSE1-AS1	chr22	0.337656	0.0659534	0.00182345	0.00276722	550116	Positive	lincRNA	-82642	Distal non-target gene eQTMs
ENSG00000119139	cg07225244	TJP2	chr9	-57.155	7.057	2.41e-09	6.51e-09	-82628	Negative	protein_coding	-82628	Distal target gene eQTMs
ENSG00000196466	cg17368800	ZNF799	chr19	2.492	0.225752	1.17e-13	4.7e-13	687536	Positive	protein_coding	-81944	Distal non-target gene eQTMs
ENSG00000261997	cg01823414	RP11-212I21.4	chr16	-0.543074	0.061856	4.07e-09	1.08e-08	67260	Negative	lincRNA	-81240	Distal non-target gene eQTMs
ENSG00000087253	cg01823414	LPCAT2	chr16	-3.74598	0.662401	0.00011249	0.00019358	38132	Negative	protein_coding	-81240	Distal non-target gene eQTMs
ENSG00000188372	cg18713528	ZP3	chr7	-0.683989	0.0884202	5.98e-06	1.17e-05	114765	Negative	protein_coding	-80853	Distal non-target gene eQTMs
ENSG00000107719	cg22643110	PALD1	chr10	-2.18829	0.303711	3.68e-05	6.66e-05	-80822	Negative	protein_coding	-80768	Distal target gene eQTMs
ENSG00000111669	cg17680713	TPI1	chr12	-89.231	20.4184	0.0230872	0.0304347	-201571	Negative	protein_coding	-80431	Distal non-target gene eQTMs
ENSG00000254245	cg21441849	PCDHGA3	chr5	2.33993	0.224501	1.02e-11	3.43e-11	-1060346	Positive	protein_coding	-78882	Distal non-target gene eQTMs
ENSG00000042781	cg10592245	USH2A	chr1	136.33	13.8848	1.15e-13	4.63e-13	-539783	Positive	protein_coding	-77333	Distal non-target gene eQTMs
ENSG00000117724	cg10592245	CENPF	chr1	1.01801	0.247602	0.0174202	0.0233176	-479913	Positive	protein_coding	-77333	Distal non-target gene eQTMs
ENSG00000273010	cg24160066	RP11-96K19.5	chr1	0.264089	0.043683	0.00010128	0.00017531	-655940	Positive	antisense	-77024	Distal non-target gene eQTMs
ENSG00000113712	cg06539116	CSNK1A1	chr5	-34.2242	6.95715	0.00161938	0.0024701	-275180	Negative	protein_coding	-76319	Distal non-target gene eQTMs
ENSG00000244682	cg07786995	FCGR2C	chr1	-2.04938	0.325878	2.95e-05	5.39e-05	-563585	Negative	polymorphic_pseudogene	-75150	Distal non-target gene eQTMs
ENSG00000147677	cg11675165	EIF3H	chr8	-13.0385	2.23248	6.18e-05	0.00010939	198935	Negative	protein_coding	-74562	Distal non-target gene eQTMs
ENSG00000151572	cg21726618	ANO4	chr12	-0.928988	0.2195	0.0150472	0.020324	-925259	Negative	protein_coding	-74432	Distal non-target gene eQTMs
ENSG00000172530	cg07332757	BANP	chr16	2.64136	0.166142	6.77e-24	7.83e-23	-578272	Positive	protein_coding	-74199	Distal non-target gene eQTMs
ENSG00000157423	cg10485162	HYDIN	chr16	-12.5505	1.81097	1.32e-06	2.75e-06	-148106	Positive	protein_coding	-74083	Distal non-target gene eQTMs
ENSG00000265458	cg01483119	RP13-20L14.6	chr17	0.427562	0.0210965	3.37e-30	7.78e-29	139527	Positive	antisense	-73954	Distal non-target gene eQTMs
ENSG00000109758	cg09366620	HGFAC	chr4	0.615389	0.0631745	4.81e-10	1.38e-09	404406	Positive	protein_coding	-73873	Distal non-target gene eQTMs
ENSG00000111961	cg04557121	SASH1	chr6	-25.3483	5.51507	0.00757618	0.0106547	-73555	Negative	protein_coding	-73555	Distal target gene eQTMs
ENSG00000176809	cg07788158	LRRC37A3	chr17	-6.65991	1.48312	0.00779388	0.0109433	319943	Negative	protein_coding	-73443	Distal non-target gene eQTMs
ENSG00000177182	cg07050692	CLVS1	chr8	2.4808	0.379364	7.05e-06	1.37e-05	305022	Positive	protein_coding	-73358	Distal non-target gene eQTMs
ENSG00000134058	cg05608159	CDK7	chr5	-3.29059	0.260826	1.08e-19	7.96e-19	946519	Positive	protein_coding	-72556	Distal non-target gene eQTMs
ENSG00000260257	cg05998899	RP5-1085F17.3	chr20	2.45223	0.217961	9.94e-16	4.93e-15	-705616	Positive	lincRNA	-72162	Distal non-target gene eQTMs
ENSG00000270720	cg21123913	RP11-84C13.2	chr4	-0.272178	0.0321929	2.67e-10	7.83e-10	526771	Negative	lincRNA	-71465	Distal non-target gene eQTMs
ENSG00000145337	cg01368133	PYURF	chr4	12.3536	0.974484	4.04e-19	2.8e-18	71412	Negative	protein_coding	-71362	Distal non-target gene eQTMs
ENSG00000132635	cg25220249	PCED1A	chr20	7.84805	0.898965	4.94e-11	1.55e-10	-662728	Positive	protein_coding	-70975	Distal non-target gene eQTMs
ENSG00000198393	cg15473325	ZNF26	chr12	3.75121	0.447024	8.07e-08	1.89e-07	425864	Positive	protein_coding	-70950	Distal non-target gene eQTMs
ENSG00000102780	cg10480382	DGKH	chr13	-5.6786	0.756134	1.04e-07	2.41e-07	-70632	Negative	protein_coding	-70632	Distal target gene eQTMs
ENSG00000120662	cg10480382	MTRF1	chr13	-1.04216	0.107907	6.2e-12	2.12e-11	894299	Negative	protein_coding	-70632	Distal non-target gene eQTMs
ENSG00000225614	cg09962809	ZNF469	chr16	-1.47486	0.091131	1.38e-22	1.38e-21	-140521	Negative	protein_coding	-70193	Distal non-target gene eQTMs
ENSG00000269982	cg19748155	RP11-1020A11.2	chr3	-0.256198	0.0439847	0.00010365	0.00017912	-137035	Negative	antisense	-69338	Distal non-target gene eQTMs
ENSG00000177822	cg26769081	AC108142.1	chr4	0.323206	0.0534773	1.3e-05	2.46e-05	337855	Positive	antisense	-68306	Distal non-target gene eQTMs
ENSG00000070610	cg26325209	GBA2	chr9	-54.5466	12.7597	0.0137262	0.0186428	522022	Negative	protein_coding	-68032	Distal non-target gene eQTMs
ENSG00000227388	cg16079066	RP11-112J3.16	chr9	-1.71225	0.133654	2.72e-16	1.42e-15	-486277	Negative	lincRNA	-67584	Distal non-target gene eQTMs
ENSG00000120903	cg20136774	CHRNA2	chr8	6.35392	1.27566	0.0198893	0.0264133	-80745	Positive	protein_coding	-67529	Distal non-target gene eQTMs
ENSG00000066735	cg18762076	KIF26A	chr14	-2.25818	0.128682	1.62e-26	2.51e-25	509438	Positive	protein_coding	-67389	Distal non-target gene eQTMs
ENSG00000166170	cg18762076	BAG5	chr14	11.7153	1.17838	2.32e-13	9.12e-13	72741	Negative	protein_coding	-67389	Distal non-target gene eQTMs
ENSG00000100664	cg18762076	EIF5	chr14	37.8864	4.7562	2.78e-08	6.8e-08	-295741	Positive	protein_coding	-67389	Distal non-target gene eQTMs
ENSG00000240859	cg09261403	AC093627.10	chr7	-1.09043	0.174837	0.00025598	0.00042518	-734330	Negative	lincRNA	-67264	Distal non-target gene eQTMs
ENSG00000172935	cg26456404	MRGPRF	chr11	-0.622556	0.0654327	1.06e-09	2.96e-09	111571	Negative	protein_coding	-67069	Distal non-target gene eQTMs
ENSG00000110092	cg26456404	CCND1	chr11	-13.7817	1.52179	2e-05	3.71e-05	525121	Negative	protein_coding	-67069	Distal non-target gene eQTMs
ENSG00000181019	cg26831220	NQO1	chr16	7.38446	1.32058	0.00480619	0.00693562	939507	Negative	protein_coding	-66608	Distal non-target gene eQTMs
ENSG00000172782	cg04028224	FADS6	chr17	0.650827	0.107403	0.00357208	0.00523336	-140266	Positive	protein_coding	-66455	Distal non-target gene eQTMs
ENSG00000117069	cg09826056	ST6GALNAC5	chr1	-6.06698	1.03482	7.13e-05	0.00012547	-1178196	Negative	protein_coding	-66134	Distal non-target gene eQTMs
ENSG00000171570	cg01334632	RAB4B-EGLN2	chr19	0.343827	0.0542819	7.17e-05	0.00012616	247342	Positive	protein_coding	-64659	Distal non-target gene eQTMs
ENSG00000184371	cg06956273	CSF1	chr1	4.75399	0.911763	0.0309397	0.0401007	297241	Positive	protein_coding	-64390	Distal non-target gene eQTMs
ENSG00000078246	cg12477268	TULP3	chr12	-5.16135	0.979055	0.00264128	0.00393361	842057	Negative	protein_coding	-64380	Distal non-target gene eQTMs
ENSG00000154162	cg01667892	CDH12	chr5	-11.7169	2.95262	0.011738	0.0160891	1756874	Negative	protein_coding	-63961	Distal non-target gene eQTMs
ENSG00000077348	cg00019377	EXOSC5	chr19	1.26799	0.102507	1.49e-17	8.84e-17	-857257	Positive	protein_coding	-62876	Distal non-target gene eQTMs
ENSG00000261762	cg20905746	RP11-650L12.2	chr15	-2.1422	0.30275	1.03e-06	2.17e-06	284173	Negative	antisense	-62809	Distal non-target gene eQTMs
ENSG00000074582	cg04952446	BCS1L	chr2	3.61636	0.845124	0.0376116	0.0482007	325620	Positive	protein_coding	-62752	Distal non-target gene eQTMs
ENSG00000136381	cg20775702	IREB2	chr15	13.3318	1.39487	1.46e-12	5.3e-12	-435452	Negative	protein_coding	-62396	Distal non-target gene eQTMs
ENSG00000041357	cg20775702	PSMA4	chr15	5.90183	0.62189	3.98e-11	1.26e-10	-332478	Negative	protein_coding	-62396	Distal non-target gene eQTMs
ENSG00000175348	cg05003666	TMEM9B	chr11	-15.8693	2.10032	3.07e-08	7.48e-08	-866032	Positive	protein_coding	-61926	Distal non-target gene eQTMs
ENSG00000132970	cg17440241	WASF3	chr13	-18.5929	2.31835	3.79e-09	1.01e-08	-61761	Negative	protein_coding	-61761	Distal target gene eQTMs
ENSG00000112033	cg08342588	PPARD	chr6	13.3878	0.949676	9.72e-23	9.85e-22	815359	Negative	protein_coding	-61138	Distal non-target gene eQTMs
ENSG00000137309	cg08342588	HMGA1	chr6	24.5421	1.68902	4.28e-22	4.06e-21	-290326	Negative	protein_coding	-61138	Distal non-target gene eQTMs
ENSG00000186577	cg08342588	C6orf1	chr6	3.86668	0.438245	2.2e-10	6.51e-10	280818	Negative	protein_coding	-61138	Distal non-target gene eQTMs
ENSG00000156374	cg13491644	PCGF6	chr10	-1.9174	0.344765	0.00044317	0.00071899	252285	Negative	protein_coding	-61102	Distal non-target gene eQTMs
ENSG00000148362	cg12133363	C9orf142	chr9	3.62305	0.364098	2.43e-12	8.62e-12	-674412	Positive	protein_coding	-61090	Distal non-target gene eQTMs
ENSG00000154262	cg16458864	ABCA6	chr17	-0.825965	0.101122	5.68e-09	1.48e-08	-759016	Positive	protein_coding	-60504	Distal non-target gene eQTMs
ENSG00000196704	cg16458864	AMZ2	chr17	-12.6153	2.05037	3.11e-05	5.67e-05	-71756	Positive	protein_coding	-60504	Distal non-target gene eQTMs
ENSG00000274712	cg16458864	RP11-147L13.15	chr17	-2.93262	0.640944	0.00832334	0.0116476	-114197	Negative	lincRNA	-60504	Distal non-target gene eQTMs
ENSG00000132561	cg11857223	MATN2	chr8	-28.3519	2.94713	5.35e-12	1.84e-11	-60371	Negative	protein_coding	-60371	Distal target gene eQTMs
ENSG00000114999	cg02178318	TTL	chr2	5.02798	1.06292	0.0080098	0.0112285	-60154	Positive	protein_coding	-60156	Distal target gene eQTMs
ENSG00000116747	cg11512129	TROVE2	chr1	26.6392	4.17199	8.63e-07	1.83e-06	-122727	Negative	protein_coding	-60132	Distal non-target gene eQTMs
ENSG00000121579	cg23996508	NAA50	chr3	17.1125	2.22908	1.15e-07	2.65e-07	-636841	Positive	protein_coding	-60085	Distal non-target gene eQTMs
ENSG00000203867	cg06069280	RBM20	chr10	-1.17415	0.144937	5.26e-09	1.38e-08	588368	Negative	protein_coding	-59600	Distal non-target gene eQTMs
ENSG00000042980	cg09359521	ADAM28	chr8	-1.50326	0.249198	0.00010015	0.00017348	-950230	Negative	protein_coding	-59547	Distal non-target gene eQTMs
ENSG00000087884	cg23393484	AAMDC	chr11	-0.743663	0.0981673	1.22e-07	2.81e-07	900992	Negative	protein_coding	-59250	Distal non-target gene eQTMs
ENSG00000227733	cg08682063	RP4-565E6.1	chr1	-1.51218	0.169947	1.11e-11	3.71e-11	-559023	Negative	lincRNA	-58778	Distal non-target gene eQTMs
ENSG00000237188	cg08682063	RP11-337C18.8	chr1	0.680358	0.102677	9.03e-07	1.91e-06	-427435	Positive	antisense	-58778	Distal non-target gene eQTMs
ENSG00000128159	cg09635994	TUBGCP6	chr22	-18.6997	1.74849	5.73e-15	2.63e-14	515146	Negative	protein_coding	-58420	Distal non-target gene eQTMs
ENSG00000116128	cg21813591	BCL9	chr1	6.62952	0.594247	1.21e-16	6.54e-16	-58244	Positive	protein_coding	-58333	Distal target gene eQTMs
ENSG00000230084	cg26605264	RP4-613B23.1	chr3	1.05627	0.0641966	1.2e-24	1.5e-23	-529941	Positive	antisense	-58220	Distal non-target gene eQTMs
ENSG00000164008	cg02508525	C1orf50	chr1	1.57286	0.151425	1.41e-13	5.63e-13	-996474	Positive	protein_coding	-57899	Distal non-target gene eQTMs
ENSG00000245680	cg16833778	ZNF585B	chr19	-4.66442	0.79312	7.97e-05	0.00013954	-207701	Negative	protein_coding	-57549	Distal non-target gene eQTMs
ENSG00000124743	cg09307794	KLHL31	chr6	-1.53586	0.234985	6.31e-06	1.23e-05	339210	Negative	protein_coding	-57144	Distal non-target gene eQTMs
ENSG00000012660	cg09307794	ELOVL5	chr6	-20.4953	4.72039	0.0331764	0.0428542	719728	Positive	protein_coding	-57144	Distal non-target gene eQTMs
ENSG00000263612	cg13637750	AF186192.6	chr8	0.293449	0.0648705	0.0142356	0.0192929	509969	Positive	lincRNA	-55914	Distal non-target gene eQTMs
ENSG00000174948	cg03740997	GPR149	chr3	1.13745	0.168424	4.29e-05	7.7e-05	744577	Positive	protein_coding	-55396	Distal non-target gene eQTMs
ENSG00000250608	cg24097258	RP11-933H2.4	chr3	1.1212	0.0596116	2.13e-28	4.04e-27	-419207	Positive	processed_transcript	-55290	Distal non-target gene eQTMs
ENSG00000143228	cg16604136	NUF2	chr1	-1.69043	0.242676	5.02e-07	1.09e-06	-55127	Negative	protein_coding	-55127	Distal target gene eQTMs
ENSG00000254995	cg00822539	STX16-NPEPL1	chr20	3.46222	0.477228	2.43e-05	4.47e-05	-243134	Positive	protein_coding	-54850	Distal non-target gene eQTMs
ENSG00000146425	cg16700296	DYNLT1	chr6	-5.68199	0.309587	1.49e-29	3.18e-28	67983	Positive	protein_coding	-54443	Distal non-target gene eQTMs
ENSG00000072858	cg15612628	SIDT1	chr3	-0.199243	0.0434009	0.00720062	0.0101615	-966584	Positive	protein_coding	-53359	Distal non-target gene eQTMs
ENSG00000065621	cg00236004	GSTO2	chr10	-7.27893	0.630769	5.09e-17	2.85e-16	-137870	Negative	protein_coding	-52979	Distal non-target gene eQTMs
ENSG00000261338	cg04184094	RP11-378A13.1	chr2	-0.811283	0.104007	1.61e-08	4.03e-08	-67257	Negative	sense_overlapping	-52184	Distal non-target gene eQTMs
ENSG00000101166	cg10003667	PRELID3B	chr20	-15.5019	3.52967	0.0141941	0.0192396	-141300	Positive	protein_coding	-52127	Distal non-target gene eQTMs
ENSG00000223705	cg18475729	NSUN5P1	chr7	-7.95038	1.09285	2.3e-07	5.16e-07	904461	Positive	transcribed_unprocessed_pseudogene	-52071	Distal non-target gene eQTMs
ENSG00000092621	cg03373466	PHGDH	chr1	10.369	1.48165	3.76e-06	7.49e-06	-63188	Positive	protein_coding	-51801	Distal target gene eQTMs
ENSG00000025293	cg15750633	PHF20	chr20	-13.9877	3.21698	0.0224835	0.0296769	848597	Negative	protein_coding	-51231	Distal non-target gene eQTMs
ENSG00000121653	cg01368868	MAPK8IP1	chr11	31.1912	1.29205	1.11e-39	8.71e-38	739430	Negative	protein_coding	-50415	Distal non-target gene eQTMs
ENSG00000121680	cg01368868	PEX16	chr11	4.82272	0.277345	5.59e-29	1.13e-27	-763442	Positive	protein_coding	-50415	Distal non-target gene eQTMs
ENSG00000134265	cg01477978	NAPG	chr18	-8.49265	1.90326	0.00580652	0.00829133	767338	Negative	protein_coding	-50402	Distal non-target gene eQTMs
ENSG00000176826	cg06355175	FKBP9P1	chr7	0.302632	0.0389986	2.15e-08	5.31e-08	-265799	Positive	transcribed_unprocessed_pseudogene	-49827	Distal non-target gene eQTMs
ENSG00000149452	cg05041783	SLC22A8	chr11	-1.25089	0.184219	3.49e-05	6.33e-05	899597	Negative	protein_coding	-49823	Distal non-target gene eQTMs
ENSG00000144724	cg02141701	PTPRG	chr3	-13.5525	2.21628	8.26e-06	1.6e-05	-1716530	Negative	protein_coding	-49784	Distal non-target gene eQTMs
ENSG00000196352	cg26271110	CD55	chr1	-5.49573	1.27416	0.0236189	0.0311055	764074	Positive	protein_coding	-49772	Distal non-target gene eQTMs
ENSG00000232931	cg04333213	LINC00342	chr2	-25.0993	4.98982	0.00144064	0.00220839	-460214	Negative	lincRNA	-49534	Distal non-target gene eQTMs
ENSG00000137070	cg13695933	IL11RA	chr9	-8.29801	1.53088	0.00019884	0.00033339	-888810	Negative	protein_coding	-49385	Distal non-target gene eQTMs
ENSG00000144021	cg26529376	CIAO1	chr2	14.7907	1.00676	2.87e-23	3.08e-22	919552	Positive	protein_coding	-49276	Distal non-target gene eQTMs
ENSG00000241360	cg09192333	PDXP	chr22	21.2827	2.36875	4.44e-10	1.28e-09	-87420	Positive	protein_coding	-49139	Distal non-target gene eQTMs
ENSG00000132623	cg27204739	ANKEF1	chr20	5.11682	1.18321	0.0065172	0.00924752	-49009	Positive	protein_coding	-49009	Distal target gene eQTMs
ENSG00000253710	cg03268012	ALG11	chr13	4.69613	0.479007	1.75e-12	6.3e-12	378978	Positive	protein_coding	-48965	Distal non-target gene eQTMs
ENSG00000162494	cg19283112	LRRC38	chr1	-1.31701	0.304757	0.0132663	0.018053	274085	Negative	protein_coding	-48860	Distal non-target gene eQTMs
ENSG00000116731	cg21605566	PRDM2	chr1	19.8102	3.59527	8.15e-05	0.00014255	-48856	Positive	protein_coding	-48856	Distal target gene eQTMs
ENSG00000099284	cg12329405	H2AFY2	chr10	-2.62895	0.17019	1.41e-23	1.58e-22	734230	Negative	protein_coding	-48632	Distal non-target gene eQTMs
ENSG00000060339	cg12329405	CCAR1	chr10	15.6679	1.17722	1.23e-20	9.99e-20	-597604	Negative	protein_coding	-48632	Distal non-target gene eQTMs
ENSG00000107625	cg12329405	DDX50	chr10	7.61639	0.800128	1.28e-11	4.25e-11	-417330	Positive	protein_coding	-48632	Distal non-target gene eQTMs
ENSG00000078237	cg13719771	TIGAR	chr12	-3.20048	0.625101	0.00119605	0.00185023	-345277	Negative	protein_coding	-48096	Distal non-target gene eQTMs
ENSG00000101782	cg26570553	RIOK3	chr18	-12.5695	1.29062	2.78e-13	1.09e-12	607015	Positive	protein_coding	-48011	Distal non-target gene eQTMs
ENSG00000109576	cg17550513	AADAT	chr4	-3.03822	0.302603	2.64e-14	1.13e-13	-399667	Positive	protein_coding	-47922	Distal non-target gene eQTMs
ENSG00000137601	cg17550513	NEK1	chr4	-4.00561	0.539107	1.31e-07	3.01e-07	267698	Positive	protein_coding	-47922	Distal non-target gene eQTMs
ENSG00000224877	cg09059758	C17orf89	chr17	1.72996	0.177694	2.99e-12	1.05e-11	-204086	Positive	protein_coding	-47916	Distal non-target gene eQTMs
ENSG00000257767	cg09578254	RP11-162P23.2	chr12	2.99395	0.247667	6.57e-15	3e-14	859286	Positive	protein_coding	-47835	Distal non-target gene eQTMs
ENSG00000184838	cg08796299	PRR16	chr5	-0.733337	0.121022	9.12e-06	1.76e-05	-47806	Negative	protein_coding	-47828	Distal target gene eQTMs
ENSG00000142233	cg01483824	NTN5	chr19	-3.389	0.575333	0.00140789	0.00216027	-218778	Negative	protein_coding	-47754	Distal non-target gene eQTMs
ENSG00000196547	cg04795110	MAN2A2	chr15	-39.8536	6.15513	1.24e-05	2.35e-05	466598	Negative	protein_coding	-47402	Distal non-target gene eQTMs
ENSG00000225193	cg04795110	RPS12P26	chr15	-0.497208	0.0661538	1.58e-05	2.97e-05	-229048	Negative	transcribed_processed_pseudogene	-47402	Distal non-target gene eQTMs
ENSG00000077585	cg14550672	GPR137B	chr1	52.3099	4.37067	3.54e-18	2.24e-17	-252795	Positive	protein_coding	-47043	Distal non-target gene eQTMs
ENSG00000143669	cg14550672	LYST	chr1	119.353	9.81037	1.44e-17	8.56e-17	734259	Negative	protein_coding	-47043	Distal non-target gene eQTMs
ENSG00000086619	cg14550672	ERO1B	chr1	10.2261	0.984819	3.94e-13	1.51e-12	179745	Negative	protein_coding	-47043	Distal non-target gene eQTMs
ENSG00000084072	cg07883627	PPIE	chr1	6.86951	0.911884	6.84e-08	1.61e-07	-46539	Positive	protein_coding	-46539	Distal target gene eQTMs
ENSG00000023171	cg23965035	GRAMD1B	chr11	-81.2263	7.60697	1.16e-13	4.67e-13	-46462	Negative	protein_coding	-46462	Distal target gene eQTMs
ENSG00000139990	cg04158862	DCAF5	chr14	-7.91941	0.667028	1.56e-16	8.34e-16	607109	Negative	protein_coding	-46394	Distal non-target gene eQTMs
ENSG00000164347	cg20482071	GFM2	chr5	10.7681	0.817606	2.23e-20	1.76e-19	-35845	Positive	protein_coding	-45338	Distal non-target gene eQTMs
ENSG00000152359	cg20482071	POC5	chr5	10.6809	0.992206	3.8e-15	1.78e-14	-988763	Positive	protein_coding	-45338	Distal non-target gene eQTMs
ENSG00000182957	cg24776343	SPATA13	chr13	-11.6225	2.31947	0.00916413	0.012739	364158	Negative	protein_coding	-45277	Distal non-target gene eQTMs
ENSG00000113161	cg08868930	HMGCR	chr5	15.2693	1.9559	4.47e-09	1.18e-08	651186	Positive	protein_coding	-45120	Distal non-target gene eQTMs
ENSG00000113163	cg03235083	COL4A3BP	chr5	10.85	1.24342	4.23e-10	1.22e-09	-671204	Positive	protein_coding	-45118	Distal non-target gene eQTMs
ENSG00000231829	cg10069677	RP11-310E22.5	chr10	1.14163	0.0906845	1.79e-15	8.63e-15	-562708	Positive	lincRNA	-44994	Distal non-target gene eQTMs
ENSG00000145700	cg08343754	ANKRD31	chr5	-0.341321	0.0614008	0.00016542	0.0002799	-383266	Negative	protein_coding	-44986	Distal non-target gene eQTMs
ENSG00000274349	cg03061960	ZNF658	chr9	-4.31318	0.686219	2.2e-08	5.43e-08	-44938	Negative	protein_coding	-44938	Distal target gene eQTMs
ENSG00000134627	cg06840402	PIWIL4	chr11	-1.64501	0.173313	1.74e-11	5.69e-11	-44826	Negative	protein_coding	-44826	Distal target gene eQTMs
ENSG00000187955	cg25327343	COL14A1	chr8	-1.68227	0.221908	5.09e-07	1.11e-06	850223	Negative	protein_coding	-44523	Distal non-target gene eQTMs
ENSG00000114757	cg06382244	PEX5L	chr3	-18.3336	3.49292	0.00040636	0.00066232	1117516	Negative	protein_coding	-44333	Distal non-target gene eQTMs
ENSG00000163738	cg09319706	MTHFD2L	chr4	-2.65922	0.382501	4.85e-07	1.06e-06	-44262	Negative	protein_coding	-44262	Distal target gene eQTMs
ENSG00000274893	cg01021437	RP11-15E1.5	chr9	0.46533	0.0634034	8.6e-11	2.64e-10	886156	Negative	lincRNA	-44255	Distal non-target gene eQTMs
ENSG00000276386	cg01021437	CNTNAP3P2	chr9	0.479846	0.121379	0.00034106	0.0005597	158879	Positive	unprocessed_pseudogene	-44255	Distal non-target gene eQTMs
ENSG00000157214	cg23187387	STEAP2	chr7	-9.29486	2.13646	0.00737516	0.0103869	-44126	Negative	protein_coding	-44126	Distal target gene eQTMs
ENSG00000101442	cg16666964	ACTR5	chr20	2.26818	0.48965	0.00401492	0.00584415	102411	Positive	protein_coding	-44115	Distal non-target gene eQTMs
ENSG00000174106	cg12427262	LEMD3	chr12	-20.0216	3.00415	1.56e-05	2.93e-05	345117	Negative	protein_coding	-43273	Distal non-target gene eQTMs
ENSG00000248334	cg17741501	WHAMMP2	chr15	2.48544	0.313006	5.27e-09	1.38e-08	-94764	Positive	transcribed_unprocessed_pseudogene	-42683	Distal non-target gene eQTMs
ENSG00000074842	cg03673558	MYDGF	chr19	1.98941	0.263684	4.07e-07	8.92e-07	370053	Positive	protein_coding	-42314	Distal non-target gene eQTMs
ENSG00000238198	cg19722720	RP11-31F15.2	chr1	-1.53317	0.216069	8.97e-07	1.9e-06	-502956	Negative	lincRNA	-42190	Distal non-target gene eQTMs
ENSG00000166407	cg25363151	LMO1	chr11	1.77504	0.115813	2.34e-23	2.54e-22	586577	Negative	protein_coding	-42108	Distal non-target gene eQTMs
ENSG00000010292	cg19463247	NCAPD2	chr12	-9.23184	1.57399	0.009113	0.012672	-41938	Negative	protein_coding	-41938	Distal target gene eQTMs
ENSG00000267248	cg26962505	CTD-2319I12.4	chr17	-0.442669	0.0964017	0.00403809	0.0058769	-749068	Negative	processed_transcript	-41885	Distal non-target gene eQTMs
ENSG00000263276	cg20543683	RP11-96D1.10	chr16	2.01145	0.317624	0.00389198	0.00567318	-553804	Positive	sense_overlapping	-41292	Distal non-target gene eQTMs
ENSG00000143847	cg04398759	PPFIA4	chr1	-24.1301	5.80576	0.0389329	0.0497923	-105440	Positive	protein_coding	-41284	Distal non-target gene eQTMs
ENSG00000257591	cg21634331	ZNF625	chr19	-5.49367	0.641944	1.76e-08	4.39e-08	732299	Negative	protein_coding	-40438	Distal non-target gene eQTMs
ENSG00000132026	cg21634331	RTBDN	chr19	-148.321	17.9365	3.7e-08	8.96e-08	48911	Negative	protein_coding	-40438	Distal non-target gene eQTMs
ENSG00000141428	cg19230680	C18orf21	chr18	5.98635	0.742912	1.04e-09	2.9e-09	-365431	Positive	protein_coding	-40342	Distal non-target gene eQTMs
ENSG00000103342	cg14452248	GSPT1	chr16	13.3413	2.82682	0.00905533	0.0126017	-883468	Positive	protein_coding	-40172	Distal non-target gene eQTMs
ENSG00000100626	cg20594725	GALNT16	chr14	2.11301	0.261506	8.64e-09	2.22e-08	-507657	Positive	protein_coding	-40034	Distal non-target gene eQTMs
ENSG00000103550	cg05382480	KNOP1	chr16	-3.381	0.665112	0.00081623	0.00128611	-106671	Negative	protein_coding	-40026	Distal non-target gene eQTMs
ENSG00000092098	cg18598152	RNF31	chr14	-14.0027	1.71164	1.16e-09	3.22e-09	594935	Negative	protein_coding	-39988	Distal non-target gene eQTMs
ENSG00000186648	cg18598152	CARMIL3	chr14	-12.6568	1.6193	0.00023495	0.0003917	500261	Negative	protein_coding	-39988	Distal non-target gene eQTMs
ENSG00000184160	cg00650856	ADRA2C	chr4	2.54418	0.541491	0.0353494	0.0454761	-621645	Positive	protein_coding	-39853	Distal non-target gene eQTMs
ENSG00000227014	cg24152262	AC007285.6	chr7	0.471832	0.0235122	4.37e-33	1.44e-31	-39647	Positive	antisense	-39647	Distal target gene eQTMs
ENSG00000154016	cg08895056	GRAP	chr17	-0.521861	0.0980872	0.00880656	0.0122769	514267	Negative	protein_coding	-39555	Distal non-target gene eQTMs
ENSG00000270091	cg10718608	RP11-78O7.2	chr17	-0.287308	0.0704735	0.0337629	0.0435575	-361682	Negative	lincRNA	-39523	Distal non-target gene eQTMs
ENSG00000129460	cg11723850	NGDN	chr14	5.86002	0.383752	3.21e-24	3.85e-23	-81155	Positive	protein_coding	-39084	Distal non-target gene eQTMs
ENSG00000100813	cg11723850	ACIN1	chr14	21.9328	2.82528	5.99e-09	1.56e-08	492280	Negative	protein_coding	-39084	Distal non-target gene eQTMs
ENSG00000214013	cg17178280	GANC	chr15	-3.11476	0.164363	1.57e-31	4.21e-30	612973	Positive	protein_coding	-39036	Distal non-target gene eQTMs
ENSG00000142185	cg21332948	TRPM2	chr21	-5.78146	0.707308	2.39e-06	4.86e-06	446328	Negative	protein_coding	-38649	Distal non-target gene eQTMs
ENSG00000205922	cg26308113	ONECUT3	chr19	-7.59912	0.687389	1.91e-14	8.32e-14	-555670	Negative	protein_coding	-38518	Distal non-target gene eQTMs
ENSG00000267059	cg26308113	AC005943.2	chr19	-1.62173	0.15756	1.16e-11	3.88e-11	729704	Negative	protein_coding	-38518	Distal non-target gene eQTMs
ENSG00000197757	cg22378817	HOXC6	chr12	0.359394	0.0609305	0.00067417	0.00107139	-38080	Positive	protein_coding	-38080	Distal target gene eQTMs
ENSG00000281731	cg22608385	RP11-384K6.8	chr4	0.79999	0.0422904	6.6e-34	2.47e-32	224623	Positive	lincRNA	-38022	Distal non-target gene eQTMs
ENSG00000178586	cg10717312	OR6B3	chr2	3.75953	0.888383	0.0301278	0.0391176	991750	Positive	protein_coding	-37989	Distal non-target gene eQTMs
ENSG00000265413	cg24262206	RP11-789C17.1	chr18	-0.228644	0.025341	6.48e-11	2.01e-10	-737765	Negative	sense_intronic	-37982	Distal non-target gene eQTMs
ENSG00000142798	cg06912792	HSPG2	chr1	3.98649	0.402825	1.08e-06	2.27e-06	267998	Negative	protein_coding	-37615	Distal non-target gene eQTMs
ENSG00000169019	cg16755630	COMMD8	chr4	-5.14469	0.65074	1.05e-08	2.67e-08	-419530	Negative	protein_coding	-37534	Distal non-target gene eQTMs
ENSG00000149289	cg27660807	ZC3H12C	chr11	-6.41576	1.40307	0.00379888	0.00554253	-37262	Negative	protein_coding	-37293	Distal target gene eQTMs
ENSG00000262209	cg03898577	PCDHGB3	chr5	1.33689	0.186319	4.25e-06	8.43e-06	-37204	Positive	protein_coding	-37182	Distal target gene eQTMs
ENSG00000100228	cg20279003	RAB36	chr22	4.10194	0.344275	2.13e-16	1.12e-15	-71428	Positive	protein_coding	-37050	Distal non-target gene eQTMs
ENSG00000002933	cg09138267	TMEM176A	chr7	5.80179	1.07113	0.00359425	0.00526277	394700	Positive	protein_coding	-36913	Distal non-target gene eQTMs
ENSG00000106565	cg09138267	TMEM176B	chr7	6.94638	1.43268	0.0122359	0.0167377	-385582	Positive	protein_coding	-36913	Distal non-target gene eQTMs
ENSG00000204934	cg09138267	ATP6V0E2-AS1	chr7	1.2347	0.289335	0.0245638	0.0322894	538006	Positive	antisense	-36913	Distal non-target gene eQTMs
ENSG00000126883	cg09490638	NUP214	chr9	-13.2033	1.97957	2.44e-06	4.96e-06	916426	Negative	protein_coding	-36582	Distal non-target gene eQTMs
ENSG00000052126	cg17014266	PLEKHA5	chr12	-8.97567	1.03625	7.24e-11	2.24e-10	-310773	Negative	protein_coding	-36480	Distal non-target gene eQTMs
ENSG00000253284	cg15555402	RP11-282K24.3	chr12	0.686267	0.0521179	1.1e-19	8.1e-19	-293448	Positive	sense_intronic	-36477	Distal non-target gene eQTMs
ENSG00000196453	cg27511265	ZNF777	chr7	12.6769	0.589726	4.31e-36	2.21e-34	973829	Negative	protein_coding	-36402	Distal non-target gene eQTMs
ENSG00000261305	cg27511265	RP4-584D14.7	chr7	1.96337	0.132299	1.76e-22	1.74e-21	-67709	Positive	sense_overlapping	-36402	Distal non-target gene eQTMs
ENSG00000188707	cg27511265	ZBED6CL	chr7	3.93343	0.314773	7.98e-17	4.39e-16	-82553	Positive	protein_coding	-36402	Distal non-target gene eQTMs
ENSG00000033100	cg27511265	CHPF2	chr7	6.46632	0.554745	2.16e-15	1.03e-14	827297	Positive	protein_coding	-36402	Distal non-target gene eQTMs
ENSG00000067900	cg06030229	ROCK1	chr18	12.9186	1.56732	8.8e-09	2.26e-08	794266	Positive	protein_coding	-36215	Distal non-target gene eQTMs
ENSG00000141446	cg09436871	ESCO1	chr18	5.66712	1.00784	0.00018987	0.0003192	211885	Positive	protein_coding	-36212	Distal non-target gene eQTMs
ENSG00000127952	cg21866931	STYXL1	chr7	-2.65159	0.636192	0.0178007	0.0237852	-117705	Negative	protein_coding	-36031	Distal non-target gene eQTMs
ENSG00000138073	cg01704636	PREB	chr2	-6.79178	1.08724	1.99e-05	3.7e-05	-402271	Negative	protein_coding	-35795	Distal non-target gene eQTMs
ENSG00000184708	cg00520380	EIF4ENIF1	chr22	5.28812	1.21659	0.0165374	0.0222052	-188966	Positive	protein_coding	-35772	Distal non-target gene eQTMs
ENSG00000116675	cg14827054	DNAJC6	chr1	-32.2135	6.31691	0.00127775	0.00196969	741822	Negative	protein_coding	-35605	Distal non-target gene eQTMs
ENSG00000167077	cg17601959	MEI1	chr22	-1.37419	0.194379	2.38e-05	4.38e-05	194889	Positive	protein_coding	-35489	Distal non-target gene eQTMs
ENSG00000100197	cg17601959	CYP2D6	chr22	-3.12445	0.605747	0.00663168	0.00939404	-621885	Negative	protein_coding	-35489	Distal non-target gene eQTMs
ENSG00000167258	cg01341751	CDK12	chr17	8.6283	1.38213	2.58e-05	4.74e-05	-631747	Positive	protein_coding	-34943	Distal non-target gene eQTMs
ENSG00000066136	cg11386025	NFYC	chr1	4.87427	0.333467	5.08e-23	5.33e-22	-127262	Positive	protein_coding	-34898	Distal non-target gene eQTMs
ENSG00000117010	cg11386025	ZNF684	chr1	-0.443098	0.0540524	3.23e-09	8.64e-09	-287337	Negative	protein_coding	-34898	Distal non-target gene eQTMs
ENSG00000260920	cg11386025	RP1-228H13.5	chr1	-0.393441	0.0618921	2.14e-05	3.96e-05	-354591	Positive	sense_overlapping	-34898	Distal non-target gene eQTMs
ENSG00000178127	cg07376838	NDUFV2	chr18	11.2342	1.36189	1.67e-09	4.59e-09	-34811	Negative	protein_coding	-34811	Distal target gene eQTMs
ENSG00000162433	cg07966661	AK4	chr1	-69.5308	13.2886	0.00078564	0.00124024	642368	Negative	protein_coding	-34389	Distal non-target gene eQTMs
ENSG00000261189	cg13832604	RP3-512B11.3	chr6	0.903181	0.123891	4.95e-08	1.18e-07	-398660	Positive	antisense	-34194	Distal non-target gene eQTMs
ENSG00000134910	cg14346316	STT3A	chr11	15.9374	2.88692	0.00505334	0.00727255	-34120	Positive	protein_coding	-34120	Distal target gene eQTMs
ENSG00000168004	cg15801751	HRASLS5	chr11	-4.68759	0.808912	0.00095413	0.00149228	411628	Negative	protein_coding	-34104	Distal non-target gene eQTMs
ENSG00000182612	cg11543393	TSPAN10	chr17	-0.375824	0.0717257	0.00357351	0.00523501	568004	Negative	protein_coding	-34045	Distal non-target gene eQTMs
ENSG00000181873	cg24826077	IBA57	chr1	2.30405	0.265284	5.68e-10	1.62e-09	403224	Negative	protein_coding	-34041	Distal non-target gene eQTMs
ENSG00000143771	cg20492807	CNIH4	chr1	-10.1058	1.83016	0.00019055	0.00032019	-573190	Negative	protein_coding	-33786	Distal non-target gene eQTMs
ENSG00000268496	cg12551529	CTD-2587H19.2	chr19	-1.71824	0.171187	8.31e-12	2.81e-11	879521	Negative	sense_intronic	-33681	Distal non-target gene eQTMs
ENSG00000267809	cg12551529	NDUFV2P1	chr19	1.08	0.120512	3.53e-11	1.12e-10	330689	Positive	processed_pseudogene	-33681	Distal non-target gene eQTMs
ENSG00000197928	cg12551529	ZNF677	chr19	5.26982	0.703244	6.56e-08	1.55e-07	319281	Positive	protein_coding	-33681	Distal non-target gene eQTMs
ENSG00000101331	cg12003921	CCM2L	chr20	0.849924	0.0758242	2.45e-14	1.06e-13	-472972	Positive	protein_coding	-33667	Distal non-target gene eQTMs
ENSG00000172869	cg14372062	DMXL1	chr5	30.8601	3.02205	1.51e-14	6.66e-14	-33575	Negative	protein_coding	-33575	Distal target gene eQTMs
ENSG00000164199	cg20938802	ADGRV1	chr5	-65.6889	4.88309	7.08e-21	5.87e-20	-33217	Negative	protein_coding	-33217	Distal target gene eQTMs
ENSG00000183775	cg16700632	KCTD16	chr5	-3.83	0.645135	4.85e-05	8.67e-05	-33154	Negative	protein_coding	-33195	Distal target gene eQTMs
ENSG00000130165	cg26494762	ELOF1	chr19	-4.1695	0.456614	1.05e-10	3.19e-10	-799960	Negative	protein_coding	-33108	Distal non-target gene eQTMs
ENSG00000272688	cg12631169	RP13-270P17.3	chr18	0.211078	0.047286	0.00827719	0.0115895	749051	Positive	lincRNA	-33099	Distal non-target gene eQTMs
ENSG00000166436	cg25873522	TRIM66	chr11	-3.58258	0.398551	7.13e-11	2.2e-10	103148	Negative	protein_coding	-32774	Distal non-target gene eQTMs
ENSG00000198796	cg02937343	ALPK2	chr18	-5.82498	0.900458	5.41e-05	9.62e-05	413970	Negative	protein_coding	-32617	Distal non-target gene eQTMs
ENSG00000136828	cg13895979	RALGPS1	chr9	-23.1616	1.2788	8.68e-29	1.73e-27	-696951	Negative	protein_coding	-32355	Distal non-target gene eQTMs
ENSG00000049883	cg02658739	PTCD2	chr5	-10.778	0.736246	1.14e-24	1.43e-23	-527722	Negative	protein_coding	-31777	Distal non-target gene eQTMs
ENSG00000272525	cg02658739	RP11-79P5.9	chr5	-0.432556	0.0450427	6.32e-12	2.16e-11	-649461	Negative	lincRNA	-31777	Distal non-target gene eQTMs
ENSG00000101294	cg11265696	HM13	chr20	7.74114	0.592523	1.54e-19	1.12e-18	-203414	Positive	protein_coding	-31608	Distal non-target gene eQTMs
ENSG00000233184	cg24646972	RP11-421L21.3	chr1	-0.986672	0.220752	0.0109181	0.0150404	98377	Negative	antisense	-31391	Distal non-target gene eQTMs
ENSG00000114446	cg25807545	IFT57	chr3	-7.16232	0.793707	2.88e-11	9.23e-11	-888762	Negative	protein_coding	-31358	Distal non-target gene eQTMs
ENSG00000183092	cg22724319	BEGAIN	chr14	-8.63857	0.751582	8.05e-14	3.3e-13	-768683	Positive	protein_coding	-30771	Distal non-target gene eQTMs
ENSG00000153037	cg24332422	SRP19	chr5	6.04321	0.298997	5.27e-35	2.3e-33	123199	Positive	protein_coding	-30491	Distal non-target gene eQTMs
ENSG00000212643	cg20311501	ZRSR1	chr5	1.73019	0.104859	5.89e-27	9.6e-26	153805	Positive	protein_coding	-30307	Distal non-target gene eQTMs
ENSG00000196876	cg01904393	SCN8A	chr12	-12.2051	1.28849	1.93e-11	6.3e-11	168967	Positive	protein_coding	-29982	Distal non-target gene eQTMs
ENSG00000142039	cg21922468	CCDC97	chr19	5.90377	0.523379	1.21e-15	5.95e-15	-602914	Positive	protein_coding	-29925	Distal non-target gene eQTMs
ENSG00000214455	cg02472998	RCN1P2	chr13	1.9308	0.163099	1.11e-14	4.96e-14	-19126	Positive	processed_pseudogene	-29882	Distal non-target gene eQTMs
ENSG00000147509	cg02739708	RGS20	chr8	-9.96027	1.48756	1.68e-06	3.47e-06	-29828	Negative	protein_coding	-29815	Distal target gene eQTMs
ENSG00000120992	cg02739708	LYPLA1	chr8	-60.7144	10.8487	0.00018262	0.00030755	-164744	Negative	protein_coding	-29815	Distal non-target gene eQTMs
ENSG00000272491	cg20465832	RP5-1024N4.4	chr1	-0.295663	0.0571452	0.00383833	0.00559823	-25243	Negative	antisense	-29673	Distal non-target gene eQTMs
ENSG00000204060	cg17908818	FOXO6	chr1	1.31279	0.0899368	8.37e-24	9.56e-23	987401	Negative	protein_coding	-29671	Distal non-target gene eQTMs
ENSG00000113369	cg10773064	ARRDC3	chr5	-154.709	31.6436	0.00089183	0.0013987	-809627	Negative	protein_coding	-29660	Distal non-target gene eQTMs
ENSG00000004866	cg04806635	ST7	chr7	-4.11805	0.959038	0.0270777	0.035419	636239	Negative	protein_coding	-29619	Distal non-target gene eQTMs
ENSG00000123144	cg11758861	C19orf43	chr19	10.9937	0.758421	1.93e-20	1.53e-19	294060	Positive	protein_coding	-29092	Distal non-target gene eQTMs
ENSG00000232850	cg04745703	PTGES2-AS1	chr9	-0.125532	0.0191095	3.63e-05	6.58e-05	31461	Negative	lincRNA	-28867	Distal non-target gene eQTMs
ENSG00000177303	cg21850852	CASKIN2	chr17	15.001	0.68056	1.99e-35	9.13e-34	249844	Positive	protein_coding	-28777	Distal non-target gene eQTMs
ENSG00000132640	cg17407259	BTBD3	chr20	-15.5808	1.73002	1.33e-11	4.41e-11	-28712	Negative	protein_coding	-28712	Distal target gene eQTMs
ENSG00000146094	cg15260630	DOK3	chr5	-1.5365	0.236527	3.24e-05	5.9e-05	-662848	Negative	protein_coding	-28582	Distal non-target gene eQTMs
ENSG00000071205	cg20764541	ARHGAP10	chr4	-12.052	1.11209	9.01e-14	3.67e-13	-28341	Negative	protein_coding	-28341	Distal target gene eQTMs
ENSG00000197140	cg03547905	ADAM32	chr8	2.84999	0.287048	1.74e-13	6.9e-13	350464	Positive	protein_coding	-28340	Distal non-target gene eQTMs
ENSG00000282393	cg02764370	CTD-3113P16.11	chr19	4.1852	0.818105	0.00229452	0.0034411	957156	Positive	lincRNA	-28149	Distal non-target gene eQTMs
ENSG00000099977	cg03787228	DDT	chr22	1.75112	0.199535	7.27e-11	2.24e-10	550635	Negative	protein_coding	-27893	Distal non-target gene eQTMs
ENSG00000100028	cg23131454	SNRPD3	chr22	23.2817	0.881677	2.9e-45	5.25e-43	34124	Positive	protein_coding	-27727	Distal non-target gene eQTMs
ENSG00000060237	cg17895463	WNK1	chr12	-32.3165	4.75119	1.04e-06	2.19e-06	-27593	Negative	protein_coding	-27579	Distal target gene eQTMs
ENSG00000128512	cg04515677	DOCK4	chr7	10.359	1.31409	3.14e-09	8.41e-09	724329	Positive	protein_coding	-27471	Distal non-target gene eQTMs
ENSG00000198839	cg04515677	ZNF277	chr7	2.33238	0.300218	4.08e-08	9.84e-08	-243851	Negative	protein_coding	-27471	Distal non-target gene eQTMs
ENSG00000173418	cg19109774	NAA20	chr20	-5.25943	0.371658	2.31e-22	2.26e-21	231972	Negative	protein_coding	-27436	Distal non-target gene eQTMs
ENSG00000124172	cg11414560	ATP5E	chr20	-15.5606	0.873195	2.21e-31	5.8e-30	579466	Negative	protein_coding	-27432	Distal non-target gene eQTMs
ENSG00000261269	cg08084036	RP11-389C8.2	chr5	-0.342251	0.0458868	1.73e-07	3.93e-07	-305297	Negative	sense_overlapping	-27372	Distal non-target gene eQTMs
ENSG00000088812	cg03408497	ATRN	chr20	14.8452	3.1482	0.00478557	0.00690812	-677087	Positive	protein_coding	-27125	Distal non-target gene eQTMs
ENSG00000143891	cg03247208	GALM	chr2	3.19003	0.441922	1.22e-06	2.55e-06	-112425	Positive	protein_coding	-26972	Distal non-target gene eQTMs
ENSG00000258017	cg20987850	RP11-386G11.10	chr12	0.527914	0.0985553	0.00548701	0.00785999	-87613	Positive	antisense	-26659	Distal non-target gene eQTMs
ENSG00000106415	cg11193034	GLCCI1	chr7	-49.3926	6.52662	2.86e-07	6.36e-07	785454	Negative	protein_coding	-26408	Distal non-target gene eQTMs
ENSG00000186222	cg19796558	BLOC1S4	chr4	1.01729	0.156976	2.88e-06	5.8e-06	-502740	Negative	protein_coding	-26257	Distal non-target gene eQTMs
ENSG00000258644	cg14369329	SYNJ2BP-COX16	chr14	-0.963615	0.053741	2.68e-30	6.26e-29	-688324	Negative	protein_coding	-26144	Distal non-target gene eQTMs
ENSG00000259959	cg22414949	RP11-121C2.2	chr4	3.67414	0.439409	1.84e-09	5.03e-09	991141	Positive	lincRNA	-26051	Distal non-target gene eQTMs
ENSG00000280434	cg11706366	RP4-671O14.6	chr22	-0.298849	0.064899	0.00672162	0.00951684	114579	Negative	sense_overlapping	-25575	Distal non-target gene eQTMs
ENSG00000143156	cg20675235	NME7	chr1	-4.67426	0.453909	3.21e-14	1.37e-13	-789496	Negative	protein_coding	-25538	Distal non-target gene eQTMs
ENSG00000111331	cg15125438	OAS3	chr12	-7.81608	1.22322	0.0352122	0.0453141	-308140	Negative	protein_coding	-25534	Distal non-target gene eQTMs
ENSG00000197006	cg05049784	METTL9	chr16	-16.8724	1.88386	1.06e-09	2.96e-09	-593885	Negative	protein_coding	-25520	Distal non-target gene eQTMs
ENSG00000166343	cg27104869	MSS51	chr10	1.6031	0.121313	3.72e-21	3.17e-20	752998	Negative	protein_coding	-25392	Distal non-target gene eQTMs
ENSG00000133401	cg04098891	PDZD2	chr5	-48.9778	7.02148	4.74e-07	1.03e-06	-1075288	Negative	protein_coding	-25349	Distal non-target gene eQTMs
ENSG00000186951	cg23159233	PPARA	chr22	-26.1536	3.03437	6.74e-10	1.91e-09	-25242	Negative	protein_coding	-25242	Distal target gene eQTMs
ENSG00000119537	cg02052527	KDSR	chr18	-9.32311	1.11472	4e-08	9.66e-08	667395	Negative	protein_coding	-25196	Distal non-target gene eQTMs
ENSG00000070214	cg09693059	SLC44A1	chr9	-19.1117	1.68981	5.61e-18	3.47e-17	-25188	Negative	protein_coding	-25188	Distal target gene eQTMs
ENSG00000197635	cg08973102	DPP4	chr2	-0.69856	0.0729518	1.37e-12	4.99e-12	351777	Positive	protein_coding	-25182	Distal non-target gene eQTMs
ENSG00000184611	cg06942668	KCNH7	chr2	-0.666594	0.12321	0.00027965	0.00046239	-27441	Negative	protein_coding	-25126	Distal non-target gene eQTMs
ENSG00000051523	cg10496755	CYBA	chr16	-1.64792	0.171347	2.47e-07	5.52e-07	-164897	Negative	protein_coding	-25075	Distal non-target gene eQTMs
ENSG00000164318	cg21286419	EGFLAM	chr5	-48.8486	4.56021	4.62e-15	2.14e-14	421844	Negative	protein_coding	-24976	Distal non-target gene eQTMs
ENSG00000113594	cg21286419	LIFR	chr5	-39.8172	4.75549	4.26e-10	1.23e-09	-638103	Negative	protein_coding	-24976	Distal non-target gene eQTMs
ENSG00000172175	cg09443699	MALT1	chr18	-19.5519	1.96101	1.04e-12	3.84e-12	-350229	Negative	protein_coding	-24960	Distal non-target gene eQTMs
ENSG00000260751	cg26413130	CTD-2196E14.6	chr16	-0.560931	0.0631034	6.35e-11	1.97e-10	265737	Negative	sense_intronic	-24705	Distal non-target gene eQTMs
ENSG00000079101	cg22950192	CLUL1	chr18	-133.961	12.8817	7.03e-15	3.2e-14	-24388	Negative	protein_coding	-24388	Distal target gene eQTMs
ENSG00000266456	cg22950192	RP11-806L2.2	chr18	-13.4394	2.5374	0.00031011	0.00051112	28853	Negative	antisense	-24388	Distal non-target gene eQTMs
ENSG00000168569	cg06985934	TMEM223	chr11	1.31907	0.106163	1.75e-17	1.03e-16	-954384	Positive	protein_coding	-24265	Distal non-target gene eQTMs
ENSG00000189223	cg17445212	PAX8-AS1	chr2	-16.1319	0.785064	6.71e-31	1.68e-29	-24315	Negative	processed_transcript	-24214	Distal target gene eQTMs
ENSG00000151388	cg00155526	ADAMTS12	chr5	1.63642	0.350626	0.00539906	0.00774094	-810351	Positive	protein_coding	-24114	Distal non-target gene eQTMs
ENSG00000006116	cg26768712	CACNG3	chr16	-16.3319	1.84654	4.76e-10	1.37e-09	953315	Negative	protein_coding	-24007	Distal non-target gene eQTMs
ENSG00000184949	cg10955164	FAM227A	chr22	-7.6199	0.398504	1.24e-32	3.76e-31	945112	Negative	protein_coding	-23800	Distal non-target gene eQTMs
ENSG00000167987	cg26241240	VPS37C	chr11	-19.2446	3.29923	0.00042787	0.00069565	-4068	Negative	protein_coding	-23794	Distal non-target gene eQTMs
ENSG00000149483	cg13475388	TMEM138	chr11	-32.0854	4.25153	5.72e-08	1.36e-07	-453755	Negative	protein_coding	-23119	Distal non-target gene eQTMs
ENSG00000106733	cg03255899	NMRK1	chr9	-1.81971	0.284953	5.71e-06	1.12e-05	51009	Negative	protein_coding	-23039	Distal non-target gene eQTMs
ENSG00000187024	cg00619976	PTRH1	chr9	0.479859	0.0329942	9.92e-22	8.99e-21	400891	Positive	protein_coding	-23038	Distal non-target gene eQTMs
ENSG00000136141	cg00191181	LRCH1	chr13	-5.79737	0.41821	6.18e-24	7.21e-23	-22756	Negative	protein_coding	-22756	Distal target gene eQTMs
ENSG00000263809	cg16395712	RP11-849F2.7	chr17	19.4509	1.56385	2.9e-15	1.37e-14	67183	Positive	protein_coding	-22690	Distal non-target gene eQTMs
ENSG00000181790	cg00390735	ADGRB1	chr8	15.3467	0.744476	1.48e-33	5.27e-32	-22645	Positive	protein_coding	-22645	Distal target gene eQTMs
ENSG00000171045	cg00390735	TSNARE1	chr8	3.87297	0.242406	2.15e-24	2.62e-23	259995	Positive	protein_coding	-22645	Distal non-target gene eQTMs
ENSG00000185567	cg18759304	AHNAK2	chr14	-99.5882	14.1086	7.74e-05	0.00013575	-49369	Negative	protein_coding	-22595	Distal non-target gene eQTMs
ENSG00000164855	cg02890772	TMEM184A	chr7	0.381765	0.0300518	1.31e-15	6.42e-15	-793041	Positive	protein_coding	-22493	Distal non-target gene eQTMs
ENSG00000166527	cg09128019	CLEC4D	chr12	0.402943	0.0739223	0.00055916	0.00089672	-335253	Positive	protein_coding	-22256	Distal non-target gene eQTMs
ENSG00000185250	cg23231392	PPIL6	chr6	-0.872731	0.212128	0.0243069	0.0319684	-202218	Negative	protein_coding	-22164	Distal non-target gene eQTMs
ENSG00000277027	cg26973084	RMRP	chr9	2.3444	0.21723	9.77e-11	2.98e-10	555098	Positive	ribozyme	-21996	Distal non-target gene eQTMs
ENSG00000176974	cg24618492	SHMT1	chr17	-6.85112	1.10709	0.00037148	0.00060698	909749	Negative	protein_coding	-21994	Distal non-target gene eQTMs
ENSG00000232596	cg27055894	RP1-37J18.2	chr1	-1.38675	0.193388	3.54e-06	7.06e-06	897125	Negative	lincRNA	-21836	Distal non-target gene eQTMs
ENSG00000141068	cg01422252	KSR1	chr17	29.7431	3.96857	5.33e-07	1.16e-06	-1038632	Negative	protein_coding	-21809	Distal non-target gene eQTMs
ENSG00000129009	cg10294252	ISLR	chr15	-3.41049	0.499863	0.00112923	0.00175212	-446423	Negative	protein_coding	-21633	Distal non-target gene eQTMs
ENSG00000241570	cg00831726	PAQR9-AS1	chr3	-2.12451	0.219453	5.12e-13	1.94e-12	-21384	Negative	antisense	-21384	Distal target gene eQTMs
ENSG00000188582	cg00831726	PAQR9	chr3	-1.42141	0.139098	8.59e-15	3.88e-14	32870	Negative	protein_coding	-21384	Distal non-target gene eQTMs
ENSG00000130255	cg15673843	RPL36	chr19	8.34006	1.81524	0.0106821	0.0147315	684456	Negative	protein_coding	-21378	Distal non-target gene eQTMs
ENSG00000160685	cg11750116	ZBTB7B	chr1	8.61483	0.544307	2.81e-25	3.76e-24	-82336	Positive	protein_coding	-21218	Distal non-target gene eQTMs
ENSG00000179085	cg11750116	DPM3	chr1	2.06653	0.140908	1.77e-23	1.95e-22	-54925	Positive	protein_coding	-21218	Distal non-target gene eQTMs
ENSG00000116521	cg11750116	SCAMP3	chr1	4.50788	0.345387	5.21e-21	4.36e-20	-171013	Negative	protein_coding	-21218	Distal non-target gene eQTMs
ENSG00000160767	cg11750116	FAM189B	chr1	3.18418	0.227128	1.64e-20	1.31e-19	-162239	Positive	protein_coding	-21218	Distal non-target gene eQTMs
ENSG00000116584	cg11750116	ARHGEF2	chr1	9.29535	0.661122	1.86e-19	1.33e-18	-861885	Positive	protein_coding	-21218	Distal non-target gene eQTMs
ENSG00000143622	cg11750116	RIT1	chr1	-5.52307	0.410404	4.91e-19	3.37e-18	-812842	Positive	protein_coding	-21218	Distal non-target gene eQTMs
ENSG00000160753	cg11750116	RUSC1	chr1	7.43019	0.638853	9.23e-15	4.15e-14	235928	Positive	protein_coding	-21218	Distal non-target gene eQTMs
ENSG00000163462	cg11750116	TRIM46	chr1	1.17999	0.136277	1.06e-09	2.96e-09	88821	Negative	protein_coding	-21218	Distal non-target gene eQTMs
ENSG00000170265	cg10963209	ZNF282	chr7	-14.8343	0.798308	1.81e-32	5.41e-31	48260	Negative	protein_coding	-20870	Distal non-target gene eQTMs
ENSG00000181220	cg10963209	ZNF746	chr7	-12.1507	0.621173	6.29e-32	1.76e-30	-325410	Negative	protein_coding	-20870	Distal non-target gene eQTMs
ENSG00000171130	cg10963209	ATP6V0E2	chr7	-66.3365	4.31208	1.38e-25	1.93e-24	725682	Positive	protein_coding	-20870	Distal non-target gene eQTMs
ENSG00000133619	cg10963209	KRBA1	chr7	-12.7532	0.86417	4.67e-24	5.54e-23	567495	Positive	protein_coding	-20870	Distal non-target gene eQTMs
ENSG00000197558	cg10963209	SSPO	chr7	-63.4174	4.10849	8.96e-24	1.02e-22	628756	Negative	protein_coding	-20870	Distal non-target gene eQTMs
ENSG00000204946	cg10963209	ZNF783	chr7	-5.71583	0.533082	4.01e-14	1.69e-13	114885	Positive	protein_coding	-20870	Distal non-target gene eQTMs
ENSG00000272374	cg18486815	RP3-329A5.8	chr6	-2.26052	0.158253	5.18e-24	6.11e-23	98168	Negative	lincRNA	-20686	Distal non-target gene eQTMs
ENSG00000064995	cg18486815	TAF11	chr6	-2.91356	0.219314	1.35e-20	1.09e-19	441076	Negative	protein_coding	-20686	Distal non-target gene eQTMs
ENSG00000256436	cg08747670	TAS2R31	chr12	-0.187237	0.027994	1.45e-06	3.01e-06	-839222	Negative	protein_coding	-20623	Distal non-target gene eQTMs
ENSG00000161243	cg19337852	FBXO27	chr19	-2.31687	0.378278	5.89e-05	0.00010439	-726061	Negative	protein_coding	-20618	Distal non-target gene eQTMs
ENSG00000235072	cg11532433	AC012074.2	chr2	0.312134	0.0636398	0.00294037	0.00435138	-856707	Positive	lincRNA	-20515	Distal non-target gene eQTMs
ENSG00000159346	cg21142038	ADIPOR1	chr1	-57.7546	7.22051	7.15e-09	1.85e-08	-726510	Negative	protein_coding	-20415	Distal non-target gene eQTMs
ENSG00000146090	cg12035175	RASGEF1C	chr5	-0.963532	0.0843857	2.23e-15	1.06e-14	-401950	Negative	protein_coding	-20217	Distal non-target gene eQTMs
ENSG00000135549	cg19503143	PKIB	chr6	-7.28636	0.676113	8.92e-16	4.44e-15	-20102	Negative	protein_coding	-20102	Distal target gene eQTMs
ENSG00000025156	cg19503143	HSF2	chr6	-14.7666	1.30559	1.43e-16	7.67e-16	-92473	Positive	protein_coding	-20102	Distal non-target gene eQTMs
ENSG00000198721	cg03642708	ECI2	chr6	-12.1984	0.574529	4.97e-38	3.27e-36	40443	Negative	protein_coding	-20060	Distal non-target gene eQTMs
ENSG00000145945	cg03642708	FAM50B	chr6	2.52933	0.141334	1.84e-30	4.41e-29	-306759	Positive	protein_coding	-20060	Distal non-target gene eQTMs
ENSG00000137267	cg03642708	TUBB2A	chr6	33.0188	2.2984	5.55e-20	4.21e-19	1002466	Positive	protein_coding	-20060	Distal non-target gene eQTMs
ENSG00000104823	cg22522066	ECH1	chr19	9.92278	0.838409	2.06e-17	1.2e-16	-551336	Positive	protein_coding	-20051	Distal non-target gene eQTMs
ENSG00000188227	cg22522066	ZNF793	chr19	-6.01287	0.849034	1.78e-06	3.66e-06	-757147	Negative	protein_coding	-20051	Distal non-target gene eQTMs
ENSG00000283294	cg23703062	RP11-681B3.4	chr18	-0.405175	0.0894626	0.00267128	0.00397458	-522975	Negative	processed_transcript	-19927	Distal non-target gene eQTMs
ENSG00000169131	cg08691740	ZNF354A	chr5	3.9172	0.381732	9.53e-14	3.87e-13	986965	Negative	protein_coding	-19849	Distal non-target gene eQTMs
ENSG00000241014	cg07243241	RP11-244H3.1	chr1	-1.37931	0.086457	2.38e-27	4.03e-26	103905	Negative	processed_transcript	-19818	Distal non-target gene eQTMs
ENSG00000188536	cg04076387	HBA2	chr16	-12.189	1.46808	0.00138787	0.00213084	-374558	Negative	protein_coding	-19717	Distal non-target gene eQTMs
ENSG00000127022	cg05190557	CANX	chr5	136.275	15.9475	1.31e-09	3.63e-09	-19713	Negative	protein_coding	-19713	Distal target gene eQTMs
ENSG00000161013	cg05190557	MGAT4B	chr5	-5.79487	0.513161	2.03e-15	9.73e-15	-99256	Negative	protein_coding	-19713	Distal non-target gene eQTMs
ENSG00000197226	cg05190557	TBC1D9B	chr5	-23.7537	2.43863	5.61e-13	2.12e-12	-163725	Negative	protein_coding	-19713	Distal non-target gene eQTMs
ENSG00000113300	cg05190557	CNOT6	chr5	13.5852	1.54024	1.55e-10	4.65e-10	796038	Positive	protein_coding	-19713	Distal non-target gene eQTMs
ENSG00000198939	cg05190557	ZFP2	chr5	2.08588	0.245474	6.85e-10	1.94e-09	-802443	Positive	protein_coding	-19713	Distal non-target gene eQTMs
ENSG00000177932	cg05190557	ZNF354C	chr5	4.63238	0.706989	1.17e-05	2.23e-05	-637926	Negative	protein_coding	-19713	Distal non-target gene eQTMs
ENSG00000101255	cg15799353	TRIB3	chr20	-0.705325	0.162568	0.0239576	0.0315208	-19633	Negative	protein_coding	-19633	Distal target gene eQTMs
ENSG00000178952	cg07866632	TUFM	chr16	-20.2214	2.49007	5.7e-09	1.49e-08	-268930	Negative	protein_coding	-19566	Distal non-target gene eQTMs
ENSG00000069956	cg17676096	MAPK6	chr15	29.4374	4.1805	5.96e-07	1.28e-06	-19536	Negative	protein_coding	-19536	Distal target gene eQTMs
ENSG00000148834	cg19038917	GSTO1	chr10	-3.99595	0.372449	1.54e-13	6.14e-13	-19451	Negative	protein_coding	-19451	Distal target gene eQTMs
ENSG00000160256	cg00251111	FAM207A	chr21	2.99416	0.122966	1.21e-39	9.45e-38	634792	Negative	protein_coding	-19382	Distal non-target gene eQTMs
ENSG00000183250	cg00251111	LINC01547	chr21	1.19436	0.0564798	2.33e-35	1.06e-33	-627594	Positive	lincRNA	-19382	Distal non-target gene eQTMs
ENSG00000198039	cg16681239	ZNF273	chr7	2.97697	0.330946	1.52e-11	5.01e-11	-19365	Positive	protein_coding	-19365	Distal target gene eQTMs
ENSG00000167779	cg19041719	IGFBP6	chr12	-13.0537	1.32731	0.00490575	0.00707173	-374014	Positive	protein_coding	-19348	Distal non-target gene eQTMs
ENSG00000146963	cg21373064	LUC7L2	chr7	15.4112	1.91006	2.26e-08	5.57e-08	-19340	Positive	protein_coding	-19340	Distal target gene eQTMs
ENSG00000070729	cg03768318	CNGB1	chr16	-254.038	53.5126	0.00470429	0.00679525	368054	Negative	protein_coding	-19237	Distal non-target gene eQTMs
ENSG00000116039	cg11660398	ATP6V1B1	chr2	-1.04289	0.159516	1.42e-05	2.68e-05	28840	Negative	protein_coding	-19189	Distal non-target gene eQTMs
ENSG00000120875	cg21549201	DUSP4	chr8	5.57082	0.615172	2.46e-11	7.95e-11	434303	Positive	protein_coding	-19058	Distal non-target gene eQTMs
ENSG00000085117	cg09753043	CD82	chr11	2.68387	0.297002	5.42e-10	1.55e-09	989057	Positive	protein_coding	-18934	Distal non-target gene eQTMs
ENSG00000136908	cg03678049	DPM2	chr9	-6.21109	0.811762	1.17e-07	2.7e-07	588418	Negative	protein_coding	-18817	Distal non-target gene eQTMs
ENSG00000124275	cg00500145	MTRR	chr5	-9.59188	0.576135	2.03e-30	4.82e-29	-18752	Positive	protein_coding	-18752	Distal target gene eQTMs
ENSG00000211460	cg13208492	TSN	chr2	16.5062	1.77913	1.17e-09	3.25e-09	-18697	Negative	protein_coding	-18697	Distal target gene eQTMs
ENSG00000215397	cg07115304	SCRT2	chr20	-15.2116	1.01894	2.66e-22	2.58e-21	-280337	Positive	protein_coding	-18424	Distal non-target gene eQTMs
ENSG00000101282	cg07115304	RSPO4	chr20	-1.8654	0.222971	1.17e-08	2.96e-08	-577193	Negative	protein_coding	-18424	Distal non-target gene eQTMs
ENSG00000203761	cg13096820	MSTO2P	chr1	0.901296	0.142056	1.52e-05	2.86e-05	663708	Positive	unprocessed_pseudogene	-18373	Distal non-target gene eQTMs
ENSG00000004975	cg12997640	DVL2	chr17	-27.0745	5.30416	0.00573263	0.0081898	677729	Negative	protein_coding	-18265	Distal non-target gene eQTMs
ENSG00000171962	cg25390199	DRC3	chr17	-11.8626	1.31618	4.12e-11	1.3e-10	-885353	Negative	protein_coding	-18081	Distal non-target gene eQTMs
ENSG00000114349	cg07969202	GNAT1	chr3	864.056	190.16	0.0113324	0.0155757	18624	Positive	protein_coding	-17943	Distal non-target gene eQTMs
ENSG00000140382	cg21733597	HMG20A	chr15	11.0844	1.21312	1.51e-11	4.98e-11	-728941	Negative	protein_coding	-17855	Distal non-target gene eQTMs
ENSG00000242114	cg02520067	MTFP1	chr22	-15.4785	3.08875	0.0055645	0.00795867	51471	Negative	protein_coding	-17517	Distal non-target gene eQTMs
ENSG00000158079	cg08869861	PTPDC1	chr9	-4.84608	0.238736	8.87e-35	3.73e-33	561637	Negative	protein_coding	-17435	Distal non-target gene eQTMs
ENSG00000175787	cg08869861	ZNF169	chr9	-1.40359	0.0828831	8.06e-29	1.61e-27	790154	Negative	protein_coding	-17435	Distal non-target gene eQTMs
ENSG00000258839	cg02034447	MC1R	chr16	-8.2042	1.04767	1.85e-07	4.19e-07	403817	Negative	protein_coding	-17385	Distal non-target gene eQTMs
ENSG00000113140	cg22308877	SPARC	chr5	-72.306	11.1487	5.37e-05	9.55e-05	33227	Positive	protein_coding	-17378	Distal non-target gene eQTMs
ENSG00000110042	cg16368005	DTX4	chr11	10.4183	1.32809	4.14e-08	9.98e-08	-600644	Positive	protein_coding	-17099	Distal non-target gene eQTMs
ENSG00000089818	cg03952097	NECAP1	chr12	36.3183	4.4437	1.46e-09	4.03e-09	-621705	Positive	protein_coding	-17044	Distal non-target gene eQTMs
ENSG00000106526	cg19507256	ACTR3C	chr7	-1.04773	0.240224	0.0240276	0.0316058	-388527	Negative	protein_coding	-17022	Distal non-target gene eQTMs
ENSG00000171443	cg23537415	ZNF524	chr19	2.72774	0.131927	1.21e-36	6.58e-35	-58057	Positive	protein_coding	-17017	Distal non-target gene eQTMs
ENSG00000133265	cg23537415	HSPBP1	chr19	8.09354	0.416473	5.22e-34	1.99e-32	395856	Negative	protein_coding	-17017	Distal non-target gene eQTMs
ENSG00000167685	cg23537415	ZNF444	chr19	8.2493	0.469348	4.16e-27	6.9e-26	474520	Positive	protein_coding	-17017	Distal non-target gene eQTMs
ENSG00000276570	cg23537415	CTD-2587H24.14	chr19	1.30969	0.102811	4.6e-19	3.18e-18	430860	Positive	processed_transcript	-17017	Distal non-target gene eQTMs
ENSG00000196867	cg23537415	ZFP28	chr19	-5.35499	0.407802	1.12e-18	7.42e-18	880869	Positive	protein_coding	-17017	Distal non-target gene eQTMs
ENSG00000240225	cg23537415	ZNF542P	chr19	-2.30672	0.480147	0.00319034	0.00469876	710020	Positive	transcribed_unprocessed_pseudogene	-17017	Distal non-target gene eQTMs
ENSG00000152455	cg27435424	SUV39H2	chr10	-2.48075	0.204792	2.29e-17	1.33e-16	870101	Negative	protein_coding	-16904	Distal non-target gene eQTMs
ENSG00000214309	cg18178595	MBLAC1	chr7	-0.84454	0.0598936	1.28e-21	1.15e-20	-474021	Negative	protein_coding	-16824	Distal non-target gene eQTMs
ENSG00000143294	cg09477492	PRCC	chr1	-24.1341	1.64079	4.89e-23	5.15e-22	-16712	Negative	protein_coding	-16712	Distal target gene eQTMs
ENSG00000183378	cg26260789	OVCH2	chr11	-20.8619	1.8737	2.15e-15	1.03e-14	297448	Positive	protein_coding	-16635	Distal non-target gene eQTMs
ENSG00000271758	cg26260789	RP11-35J10.5	chr11	-2.83224	0.325108	9.52e-10	2.67e-09	282258	Negative	lincRNA	-16635	Distal non-target gene eQTMs
ENSG00000282246	cg18050740	RP11-295P9.13	chr10	0.336262	0.0444026	5.37e-07	1.16e-06	493972	Positive	protein_coding	-16626	Distal non-target gene eQTMs
ENSG00000152076	cg19465165	CCDC74B	chr2	1.07943	0.166132	8.15e-05	0.00014255	233243	Positive	protein_coding	-16523	Distal non-target gene eQTMs
ENSG00000153391	cg09077048	INO80C	chr18	2.69712	0.613597	0.00875075	0.012204	861978	Positive	protein_coding	-16494	Distal non-target gene eQTMs
ENSG00000241399	cg04852339	CD302	chr2	-7.77437	1.57367	0.00832266	0.0116476	-783569	Negative	protein_coding	-16425	Distal non-target gene eQTMs
ENSG00000158006	cg10498813	PAFAH2	chr1	-5.271	0.391079	7.78e-20	5.83e-19	76499	Negative	protein_coding	-16382	Distal non-target gene eQTMs
ENSG00000255966	cg06444189	RP5-940J5.3	chr12	-0.34976	0.0687067	0.00181225	0.0027514	312286	Negative	antisense	-16166	Distal non-target gene eQTMs
ENSG00000230732	cg11072281	AC127904.2	chr3	0.383473	0.0592075	3.79e-05	6.85e-05	-840688	Positive	sense_intronic	-16155	Distal non-target gene eQTMs
ENSG00000187642	cg04121631	PERM1	chr1	2.24263	0.239584	9.37e-05	0.00016293	-35239	Positive	protein_coding	-16037	Distal non-target gene eQTMs
ENSG00000132016	cg20656621	C19orf57	chr19	-2.61042	0.443023	0.00023739	0.00039547	-134599	Negative	protein_coding	-15989	Distal non-target gene eQTMs
ENSG00000115364	cg18470397	MRPL19	chr2	3.36696	0.300529	1.18e-15	5.81e-15	796943	Positive	protein_coding	-15859	Distal non-target gene eQTMs
ENSG00000280222	cg04094653	RP11-174G17.3	chr1	0.480574	0.0432246	7.05e-13	2.64e-12	-537320	Positive	TEC	-15703	Distal non-target gene eQTMs
ENSG00000236155	cg19633962	RP11-231P20.2	chr1	0.540953	0.102442	0.00138864	0.00213166	174214	Positive	transcribed_unprocessed_pseudogene	-15643	Distal non-target gene eQTMs
ENSG00000132688	cg05888917	NES	chr1	37.0082	5.39802	0.00139351	0.00213876	-11806	Positive	protein_coding	-15567	Distal non-target gene eQTMs
ENSG00000103319	cg04987871	EEF2K	chr16	-5.04147	1.08356	0.00378215	0.00552041	593604	Negative	protein_coding	-15456	Distal non-target gene eQTMs
ENSG00000273001	cg14330737	RP11-118K6.3	chr10	-0.901046	0.193574	0.00550098	0.00787807	15864	Negative	lincRNA	-15287	Distal target gene eQTMs
ENSG00000153944	cg06551697	MSI2	chr17	56.6958	4.5347	3.76e-18	2.37e-17	-1279150	Positive	protein_coding	-15164	Distal non-target gene eQTMs
ENSG00000005379	cg06551697	TSPOAP1	chr17	-10.1897	1.1547	1.36e-10	4.1e-10	233773	Negative	protein_coding	-15164	Distal non-target gene eQTMs
ENSG00000108384	cg06551697	RAD51C	chr17	1.49249	0.208004	4.67e-07	1.02e-06	157572	Negative	protein_coding	-15164	Distal non-target gene eQTMs
ENSG00000175175	cg06551697	PPM1E	chr17	6.57013	1.46831	0.00804552	0.0112777	220853	Negative	protein_coding	-15164	Distal non-target gene eQTMs
ENSG00000133477	cg21771250	FAM83F	chr22	0.741235	0.157955	0.00933004	0.0129625	-15091	Positive	protein_coding	-15096	Distal target gene eQTMs
ENSG00000116350	cg27017906	SRSF4	chr1	-10.2877	1.14494	7.81e-10	2.2e-09	-396054	Negative	protein_coding	-15068	Distal non-target gene eQTMs
ENSG00000245864	cg20375844	CTC-467M3.1	chr5	0.507629	0.0299407	4.54e-22	4.29e-21	-15072	Positive	antisense	-14887	Distal target gene eQTMs
ENSG00000249319	cg08813321	AC068533.7	chr7	-0.851854	0.0964591	9.88e-11	3.01e-10	-555842	Negative	protein_coding	-14722	Distal non-target gene eQTMs
ENSG00000175581	cg25592907	MRPL48	chr11	-1.47527	0.336263	0.00860625	0.0120148	-177651	Negative	protein_coding	-14648	Distal non-target gene eQTMs
ENSG00000174576	cg09618778	NPAS4	chr11	-0.70132	0.131211	0.0358222	0.0460452	-650459	Negative	protein_coding	-14645	Distal non-target gene eQTMs
ENSG00000170035	cg13998023	UBE2E3	chr2	-9.5526	0.76662	3.83e-19	2.66e-18	-14595	Negative	protein_coding	-14595	Distal target gene eQTMs
ENSG00000229891	cg12957096	LINC01315	chr22	0.480373	0.065713	4.6e-06	9.09e-06	-982615	Positive	lincRNA	-14442	Distal non-target gene eQTMs
ENSG00000110497	cg07065803	AMBRA1	chr11	12.8273	1.86459	3.06e-06	6.14e-06	-496408	Positive	protein_coding	-14355	Distal non-target gene eQTMs
ENSG00000019485	cg07065803	PRDM11	chr11	5.48554	0.926737	6.68e-05	0.00011785	-804200	Positive	protein_coding	-14355	Distal non-target gene eQTMs
ENSG00000163249	cg07024464	CCNYL1	chr2	-2.65017	0.275363	8.29e-12	2.8e-11	-662258	Negative	protein_coding	-14084	Distal non-target gene eQTMs
ENSG00000130520	cg16521040	LSM4	chr19	4.85701	0.812896	0.00014316	0.00024345	-999597	Negative	protein_coding	-14024	Distal non-target gene eQTMs
ENSG00000146147	cg05051799	MLIP	chr6	-0.652181	0.11396	8.94e-05	0.00015573	-14009	Negative	protein_coding	-14009	Distal target gene eQTMs
ENSG00000184014	cg18627821	DENND5A	chr11	-8.84908	1.211	1.08e-07	2.5e-07	259636	Negative	protein_coding	-13839	Distal non-target gene eQTMs
ENSG00000158169	cg17470053	FANCC	chr9	1.75734	0.167392	1.28e-14	5.68e-14	409708	Positive	protein_coding	-13838	Distal non-target gene eQTMs
ENSG00000211584	cg09021005	SLC48A1	chr12	6.26267	0.551284	1.66e-15	8.03e-15	-365045	Positive	protein_coding	-13822	Distal non-target gene eQTMs
ENSG00000198898	cg09626894	CAPZA2	chr7	-22.055	2.88378	2.51e-08	6.16e-08	-668513	Negative	protein_coding	-13799	Distal non-target gene eQTMs
ENSG00000100211	cg26038465	CBY1	chr22	2.17549	0.292382	1.69e-07	3.85e-07	442129	Positive	protein_coding	-13740	Distal non-target gene eQTMs
ENSG00000109265	cg08992954	KIAA1211	chr4	3.64145	0.321093	1.59e-15	7.71e-15	181864	Positive	protein_coding	-13593	Distal non-target gene eQTMs
ENSG00000269921	cg08992954	RP11-646I6.5	chr4	-0.230104	0.0235485	6.22e-13	2.34e-12	520416	Negative	lincRNA	-13593	Distal non-target gene eQTMs
ENSG00000228436	cg08648409	RP5-864K19.4	chr1	-0.386151	0.0536181	5.43e-07	1.17e-06	-13596	Negative	antisense	-13508	Distal target gene eQTMs
ENSG00000167645	cg06808412	YIF1B	chr19	4.70781	0.333314	1.91e-22	1.88e-21	835666	Positive	protein_coding	-13454	Distal non-target gene eQTMs
ENSG00000171914	cg21067343	TLN2	chr15	11.483	2.25847	0.00133543	0.00205321	-812385	Positive	protein_coding	-13442	Distal non-target gene eQTMs
ENSG00000114853	cg22694480	ZBTB47	chr3	33.8768	1.48238	1.49e-37	9.03e-36	151129	Positive	protein_coding	-13269	Distal non-target gene eQTMs
ENSG00000114857	cg22694480	NKTR	chr3	-174.674	9.97324	2.77e-29	5.75e-28	98087	Negative	protein_coding	-13269	Distal non-target gene eQTMs
ENSG00000234617	cg22694480	SNRK-AS1	chr3	1.4576	0.0949819	1.18e-21	1.06e-20	-844355	Positive	antisense	-13269	Distal non-target gene eQTMs
ENSG00000144648	cg22694480	ACKR2	chr3	0.523605	0.0622628	8.97e-09	2.3e-08	302184	Positive	protein_coding	-13269	Distal non-target gene eQTMs
ENSG00000239305	cg12737876	RNF103	chr2	6.50115	0.889898	3.02e-07	6.7e-07	-987289	Negative	protein_coding	-13253	Distal non-target gene eQTMs
ENSG00000096092	cg20907105	TMEM14A	chr6	-4.66134	0.394592	1.8e-17	1.06e-16	-393994	Negative	protein_coding	-13116	Distal non-target gene eQTMs
ENSG00000099901	cg12411858	RANBP1	chr22	-6.02	0.396993	7.1e-24	8.18e-23	-393043	Positive	protein_coding	-13068	Distal non-target gene eQTMs
ENSG00000128185	cg12411858	DGCR6L	chr22	-6.36292	0.508025	4.88e-17	2.74e-16	194705	Negative	protein_coding	-13068	Distal non-target gene eQTMs
ENSG00000205078	cg06071631	SYCE1L	chr16	-1.98009	0.113969	2.66e-31	6.93e-30	-13017	Negative	protein_coding	-13017	Distal target gene eQTMs
ENSG00000117411	cg23736359	B4GALT2	chr1	6.53709	0.679736	2.49e-11	8.04e-11	-12779	Positive	protein_coding	-12779	Distal target gene eQTMs
ENSG00000168899	cg17359434	VAMP5	chr2	0.748115	0.169792	0.0326681	0.0422194	-31196	Positive	protein_coding	-12771	Distal non-target gene eQTMs
ENSG00000168026	cg00091899	TTC21A	chr3	-2.02886	0.212871	3.61e-12	1.26e-11	-372214	Negative	protein_coding	-12720	Distal non-target gene eQTMs
ENSG00000121057	cg15870043	AKAP1	chr17	30.3015	7.0094	0.0103671	0.0143206	-12712	Positive	protein_coding	-12712	Distal target gene eQTMs
ENSG00000165527	cg18585629	ARF6	chr14	6.12157	0.535679	2.3e-16	1.21e-15	-967725	Positive	protein_coding	-12685	Distal non-target gene eQTMs
ENSG00000105219	cg09114441	CNTD2	chr19	0.537104	0.0516828	3.14e-12	1.1e-11	-225437	Positive	protein_coding	-12637	Distal non-target gene eQTMs
ENSG00000164465	cg20662988	DCBLD1	chr6	-0.825693	0.0917617	1.26e-11	4.19e-11	-466263	Negative	protein_coding	-12554	Distal non-target gene eQTMs
ENSG00000198546	cg16189091	ZNF511	chr10	3.90927	0.878605	0.026589	0.0348161	225506	Positive	protein_coding	-12479	Distal non-target gene eQTMs
ENSG00000264112	cg22174693	RP11-159D12.2	chr17	-25.5766	2.43563	7.9e-14	3.24e-13	543231	Negative	lincRNA	-12433	Distal non-target gene eQTMs
ENSG00000119771	cg00058708	KLHL29	chr2	5.30972	1.19759	0.0105106	0.0145098	-554519	Negative	protein_coding	-12413	Distal non-target gene eQTMs
ENSG00000267123	cg27519781	CTD-2357A8.3	chr17	6.60917	0.618668	7.37e-13	2.76e-12	-108023	Positive	lincRNA	-12328	Distal non-target gene eQTMs
ENSG00000275342	cg19954839	SGK223	chr8	0.557272	0.0522435	3.67e-14	1.56e-13	655618	Positive	protein_coding	-12154	Distal non-target gene eQTMs
ENSG00000160094	cg17716617	ZNF362	chr1	-10.6131	0.440763	9.33e-37	5.11e-35	502513	Positive	protein_coding	-12094	Distal non-target gene eQTMs
ENSG00000116497	cg17716617	S100PBP	chr1	9.50723	0.561967	1.97e-27	3.39e-26	62788	Positive	protein_coding	-12094	Distal non-target gene eQTMs
ENSG00000116525	cg17716617	TRIM62	chr1	-2.18979	0.179634	2.74e-15	1.3e-14	-391420	Positive	protein_coding	-12094	Distal non-target gene eQTMs
ENSG00000268173	cg06695833	AC007192.4	chr19	-0.630144	0.124071	0.00748579	0.0105351	43286	Negative	protein_coding	-12079	Distal non-target gene eQTMs
ENSG00000162599	cg11919778	NFIA	chr1	11.2948	0.580114	7.79e-36	3.78e-34	738399	Positive	protein_coding	-11985	Distal non-target gene eQTMs
ENSG00000279259	cg04595323	RP11-334C17.3	chr17	0.626654	0.052991	2.1e-14	9.12e-14	-279842	Negative	TEC	-11927	Distal non-target gene eQTMs
ENSG00000181045	cg04595323	SLC26A11	chr17	4.4612	0.481386	2.1e-11	6.84e-11	-207393	Positive	protein_coding	-11927	Distal non-target gene eQTMs
ENSG00000007392	cg03287339	LUC7L	chr16	-8.29319	1.53508	0.00170914	0.00260251	472166	Negative	protein_coding	-11824	Distal non-target gene eQTMs
ENSG00000266733	cg18618017	TBC1D29	chr17	-0.33706	0.0466705	1.12e-07	2.59e-07	981252	Negative	protein_coding	-11703	Distal non-target gene eQTMs
ENSG00000264772	cg26209290	RP11-186B7.4	chr17	1.72072	0.322598	0.00854118	0.0119297	-11688	Positive	processed_transcript	-11688	Distal target gene eQTMs
ENSG00000159164	cg17633422	SV2A	chr1	101.152	10.8538	7.2e-11	2.22e-10	-3778	Positive	protein_coding	-11650	Distal non-target gene eQTMs
ENSG00000143382	cg17336496	ADAMTSL4	chr1	3.89991	0.629975	0.00236975	0.00354695	649877	Negative	protein_coding	-11602	Distal non-target gene eQTMs
ENSG00000163597	cg24321297	SNHG16	chr17	-9.05846	1.37358	1.04e-05	1.99e-05	-23544	Negative	processed_transcript	-11516	Distal non-target gene eQTMs
ENSG00000124006	cg02322376	OBSL1	chr2	-65.8963	3.69606	8.59e-31	2.13e-29	-344082	Negative	protein_coding	-11409	Distal non-target gene eQTMs
ENSG00000198925	cg02322376	ATG9A	chr2	-27.2676	2.1461	4.8e-19	3.3e-18	-12734	Positive	protein_coding	-11409	Distal non-target gene eQTMs
ENSG00000072182	cg02322376	ASIC4	chr2	-26.6432	2.18204	4.39e-17	2.48e-16	307524	Negative	protein_coding	-11409	Distal non-target gene eQTMs
ENSG00000144579	cg02322376	CTDSP1	chr2	-17.1613	1.56729	2.15e-13	8.48e-13	-808390	Negative	protein_coding	-11409	Distal non-target gene eQTMs
ENSG00000072195	cg02322376	SPEG	chr2	-6.38226	0.619744	4.58e-13	1.75e-12	228197	Negative	protein_coding	-11409	Distal non-target gene eQTMs
ENSG00000135913	cg02322376	USP37	chr2	22.8341	2.27447	1.62e-11	5.32e-11	756395	Negative	protein_coding	-11409	Distal non-target gene eQTMs
ENSG00000135924	cg02322376	DNAJB2	chr2	-42.9856	5.68257	5.42e-08	1.29e-07	72621	Positive	protein_coding	-11409	Distal non-target gene eQTMs
ENSG00000163481	cg14345026	RNF25	chr2	-3.58588	0.358736	1.52e-11	5.01e-11	542746	Negative	protein_coding	-11401	Distal non-target gene eQTMs
ENSG00000169224	cg02713706	GCSAML	chr1	-0.518177	0.0644009	1.41e-07	3.23e-07	-11389	Negative	protein_coding	-11389	Distal target gene eQTMs
ENSG00000143355	cg04113478	LHX9	chr1	-7.40333	1.58336	0.0229443	0.0302556	-11372	Positive	protein_coding	-11372	Distal target gene eQTMs
ENSG00000198093	cg19759610	ZNF649	chr19	6.26217	0.727619	9.05e-10	2.54e-09	-185013	Positive	protein_coding	-10882	Distal non-target gene eQTMs
ENSG00000203546	cg14463446	RP11-176H8.1	chr14	0.274999	0.0271768	3.56e-13	1.37e-12	-764355	Positive	protein_coding	-10834	Distal non-target gene eQTMs
ENSG00000099968	cg05135549	BCL2L13	chr22	20.2821	4.11244	0.00205881	0.00310349	258106	Positive	protein_coding	-10800	Distal non-target gene eQTMs
ENSG00000130762	cg24432048	ARHGEF16	chr1	4.47064	0.384618	7.19e-16	3.61e-15	-456422	Negative	protein_coding	-10715	Distal non-target gene eQTMs
ENSG00000145919	cg25131818	BOD1	chr5	-5.6272	0.417939	4.52e-18	2.81e-17	-34340	Negative	protein_coding	-10696	Distal non-target gene eQTMs
ENSG00000175691	cg22927429	ZNF77	chr19	1.86501	0.363444	0.00776593	0.0109076	583712	Positive	protein_coding	-10657	Distal non-target gene eQTMs
ENSG00000179029	cg20524308	TMEM107	chr17	-7.18565	0.461224	1e-24	1.26e-23	-717611	Positive	protein_coding	-10565	Distal non-target gene eQTMs
ENSG00000106153	cg27436579	CHCHD2	chr7	-14.954	1.36057	1.81e-15	8.72e-15	-27064	Negative	protein_coding	-10507	Distal non-target gene eQTMs
ENSG00000130770	cg04993605	ATPIF1	chr1	-4.24337	0.625656	2.58e-06	5.22e-06	-10432	Negative	protein_coding	-10432	Distal target gene eQTMs
ENSG00000277744	cg19138387	CTC-435M10.12	chr19	-0.362021	0.0694093	0.00494952	0.00713131	-904988	Negative	sense_intronic	-10422	Distal non-target gene eQTMs
ENSG00000140450	cg00348254	ARRDC4	chr15	-2.86104	0.2366	8.47e-18	5.17e-17	-698682	Negative	protein_coding	-10414	Distal non-target gene eQTMs
ENSG00000254634	cg05047095	SMG1P6	chr16	-0.380823	0.0621306	0.00010646	0.00018372	991721	Negative	unprocessed_pseudogene	-10224	Distal non-target gene eQTMs
ENSG00000112146	cg16611220	FBXO9	chr6	-14.9605	1.74946	1.39e-10	4.19e-10	-10175	Positive	protein_coding	-10175	Distal target gene eQTMs
ENSG00000143641	cg03525122	GALNT2	chr1	9.4994	2.03033	0.00705286	0.00996495	-10046	Positive	protein_coding	-10046	Distal target gene eQTMs
ENSG00000135744	cg03525122	AGT	chr1	12.1652	1.53126	1.25e-08	3.16e-08	-634487	Positive	protein_coding	-10046	Distal non-target gene eQTMs
ENSG00000171298	cg09044863	GAA	chr17	-27.8644	1.75992	5.04e-28	9.12e-27	-323625	Negative	protein_coding	-10016	Distal non-target gene eQTMs
ENSG00000273611	cg26478249	ZNHIT3	chr17	-2.55185	0.179747	1.51e-22	1.5e-21	898820	Negative	protein_coding	-9763	Distal non-target gene eQTMs
ENSG00000267321	cg26478249	RP11-1094M14.11	chr17	-2.57449	0.184003	9.52e-22	8.65e-21	-19733	Negative	lincRNA	-9763	Distal non-target gene eQTMs
ENSG00000151692	cg18115488	RNF144A	chr2	-23.3146	1.69231	4.28e-21	3.61e-20	-9693	Negative	protein_coding	-9713	Distal target gene eQTMs
ENSG00000180483	cg04174986	DEFB119	chr20	-13.8639	1.74731	9.28e-07	1.96e-06	503188	Negative	protein_coding	-9650	Distal non-target gene eQTMs
ENSG00000157014	cg17840583	TATDN2	chr3	-4.63468	0.65508	7.35e-07	1.57e-06	-754238	Negative	protein_coding	-9537	Distal non-target gene eQTMs
ENSG00000170743	cg00969147	SYT9	chr11	3.31788	0.45798	2.54e-07	5.67e-07	-787180	Positive	protein_coding	-9469	Distal non-target gene eQTMs
ENSG00000187676	cg27059053	B3GLCT	chr13	-4.07388	0.401319	1.96e-13	7.74e-13	-9369	Negative	protein_coding	-9408	Distal target gene eQTMs
ENSG00000204334	cg04105250	ERICH2	chr2	0.564433	0.137159	0.0279788	0.0365271	-38818	Positive	protein_coding	-9391	Distal non-target gene eQTMs
ENSG00000171763	cg12289486	SPATA5L1	chr15	1.78692	0.376959	0.00532764	0.00764415	222693	Positive	protein_coding	-9299	Distal non-target gene eQTMs
ENSG00000266947	cg15705266	RP11-799D4.4	chr17	-0.693772	0.0763318	5.49e-12	1.88e-11	355799	Negative	antisense	-9203	Distal non-target gene eQTMs
ENSG00000280214	cg27563424	CTD-2012K14.5	chr16	0.79761	0.0710529	7.51e-16	3.76e-15	988467	Positive	TEC	-9192	Distal non-target gene eQTMs
ENSG00000132604	cg27563424	TERF2	chr16	-5.96091	0.607505	2.87e-13	1.12e-12	-816285	Negative	protein_coding	-9192	Distal non-target gene eQTMs
ENSG00000218891	cg09782621	ZNF579	chr19	3.06815	0.112545	4.04e-48	1.28e-45	565004	Negative	protein_coding	-9179	Distal non-target gene eQTMs
ENSG00000105063	cg09782621	PPP6R1	chr19	14.7315	0.623187	2.11e-43	2.9e-41	911999	Positive	protein_coding	-9179	Distal non-target gene eQTMs
ENSG00000063245	cg09782621	EPN1	chr19	15.7078	0.648435	7.39e-43	8.9e-41	-466552	Negative	protein_coding	-9179	Distal non-target gene eQTMs
ENSG00000261221	cg09782621	ZNF865	chr19	4.04615	0.162655	3.83e-42	4.16e-40	-536373	Negative	protein_coding	-9179	Distal non-target gene eQTMs
ENSG00000108106	cg09782621	UBE2S	chr19	5.19484	0.289159	7.92e-29	1.58e-27	742033	Negative	protein_coding	-9179	Distal non-target gene eQTMs
ENSG00000179943	cg09782621	FIZ1	chr19	3.85235	0.225522	2.06e-27	3.53e-26	550402	Positive	protein_coding	-9179	Distal non-target gene eQTMs
ENSG00000063241	cg09782621	ISOC2	chr19	1.86156	0.112754	8.69e-26	1.24e-24	688793	Negative	protein_coding	-9179	Distal non-target gene eQTMs
ENSG00000196263	cg09782621	ZNF471	chr19	-10.9938	0.78458	1.6e-20	1.28e-19	366072	Positive	protein_coding	-9179	Distal non-target gene eQTMs
ENSG00000198046	cg09782621	ZNF667	chr19	-3.26163	0.271001	5.31e-17	2.97e-16	-297547	Negative	protein_coding	-9179	Distal non-target gene eQTMs
ENSG00000269699	cg09782621	ZIM2	chr19	-0.44222	0.0416601	9.17e-15	4.13e-14	-632769	Negative	protein_coding	-9179	Distal non-target gene eQTMs
ENSG00000159648	cg01144609	TEPP	chr16	-0.308517	0.0418053	1.93e-06	3.96e-06	-149622	Negative	protein_coding	-9172	Distal non-target gene eQTMs
ENSG00000143013	cg20461704	LMO4	chr1	7.5457	0.964272	1.97e-09	5.37e-09	615279	Positive	protein_coding	-9139	Distal non-target gene eQTMs
ENSG00000126861	cg13151353	OMG	chr17	12.2378	1.80814	2.58e-06	5.22e-06	1003241	Positive	protein_coding	-9078	Distal non-target gene eQTMs
ENSG00000137817	cg06026862	PARP6	chr15	-9.77132	1.07479	5.19e-11	1.63e-10	40871	Negative	protein_coding	-9053	Distal target gene eQTMs
ENSG00000233901	cg18870599	LINC01503	chr9	0.545565	0.092024	0.00112106	0.00174039	911529	Positive	lincRNA	-9020	Distal non-target gene eQTMs
ENSG00000183098	cg17351439	GPC6	chr13	-6.39284	0.888736	1.27e-07	2.92e-07	-9007	Negative	protein_coding	-8972	Distal target gene eQTMs
ENSG00000278177	cg17351439	RP11-632L2.2	chr13	-0.263364	0.0406888	5.3e-07	1.15e-06	9202	Negative	antisense	-8972	Distal non-target gene eQTMs
ENSG00000132612	cg14740130	VPS4A	chr16	-12.1642	1.66024	2.98e-07	6.61e-07	772327	Negative	protein_coding	-8933	Distal non-target gene eQTMs
ENSG00000248592	cg19234736	TMEM110-MUSTN1	chr3	-1.33398	0.217784	1.88e-05	3.5e-05	-870303	Negative	protein_coding	-8916	Distal non-target gene eQTMs
ENSG00000102977	cg11625868	ACD	chr16	-8.49269	0.714566	2.01e-15	9.64e-15	881477	Positive	protein_coding	-8899	Distal non-target gene eQTMs
ENSG00000178449	cg18801245	COX14	chr12	-3.45834	0.306366	6.42e-17	3.56e-16	-289110	Negative	protein_coding	-8809	Distal non-target gene eQTMs
ENSG00000172687	cg18649979	ZNF738	chr19	-1.85827	0.200886	4.87e-12	1.68e-11	-146531	Positive	protein_coding	-8779	Distal non-target gene eQTMs
ENSG00000158246	cg01963906	FAM46B	chr1	-4.73396	1.01863	0.0200635	0.0266266	345729	Positive	protein_coding	-8729	Distal non-target gene eQTMs
ENSG00000166135	cg25523509	HIF1AN	chr10	-16.3775	1.54533	5.86e-14	2.43e-13	-215210	Negative	protein_coding	-8679	Distal non-target gene eQTMs
ENSG00000186862	cg25523509	PDZD7	chr10	4.22726	0.444451	8.04e-09	2.07e-08	-263397	Positive	protein_coding	-8679	Distal non-target gene eQTMs
ENSG00000148444	cg19119538	COMMD3	chr10	-20.1654	1.46196	4.33e-20	3.32e-19	783043	Positive	protein_coding	-8668	Distal non-target gene eQTMs
ENSG00000204682	cg19119538	CASC10	chr10	1.39346	0.14703	3.2e-11	1.02e-10	40685	Negative	protein_coding	-8668	Distal non-target gene eQTMs
ENSG00000253554	cg07893575	RP11-32K4.1	chr8	0.310997	0.0176553	3.99e-29	8.12e-28	690015	Negative	antisense	-8636	Distal target gene eQTMs
ENSG00000262619	cg22052291	LINC00621	chr13	0.581914	0.0311026	5.38e-33	1.75e-31	719907	Negative	lincRNA	-8587	Distal non-target gene eQTMs
ENSG00000259820	cg16513734	AC083843.1	chr8	-17.3826	1.45128	6.8e-16	3.41e-15	674000	Positive	lincRNA	-8563	Distal non-target gene eQTMs
ENSG00000279518	cg16513734	AC083843.4	chr8	-4.6578	0.448297	1.03e-14	4.61e-14	682326	Negative	TEC	-8563	Distal non-target gene eQTMs
ENSG00000141298	cg14355889	SSH2	chr17	-5.83442	0.380109	5.44e-23	5.68e-22	-476934	Positive	protein_coding	-8521	Distal non-target gene eQTMs
ENSG00000185437	cg12054554	SH3BGR	chr21	-5.55014	0.910478	7.18e-05	0.00012632	57148	Negative	protein_coding	-8463	Distal non-target gene eQTMs
ENSG00000182150	cg02789967	ERCC6L2	chr9	2.90594	0.495632	4.08e-05	7.35e-05	367880	Positive	protein_coding	-8460	Distal non-target gene eQTMs
ENSG00000184661	cg24637645	CDCA2	chr8	-0.532731	0.0924167	0.00014816	0.00025149	458978	Negative	protein_coding	-8219	Distal non-target gene eQTMs
ENSG00000253846	cg24954895	PCDHGA10	chr5	6.14489	0.52039	6.35e-15	2.9e-14	-8207	Positive	protein_coding	-8207	Distal target gene eQTMs
ENSG00000278467	cg23982151	RP11-504P24.9	chr1	-1.10692	0.21675	0.00082685	0.00130202	-189663	Negative	lincRNA	-8169	Distal non-target gene eQTMs
ENSG00000112249	cg01944958	ASCC3	chr6	-9.18958	0.983003	3.05e-11	9.75e-11	-893378	Negative	protein_coding	-8086	Distal non-target gene eQTMs
ENSG00000181915	cg14087513	ADO	chr10	6.07424	1.02461	1.62e-05	3.04e-05	422619	Positive	protein_coding	-8046	Distal non-target gene eQTMs
ENSG00000156802	cg03224259	ATAD2	chr8	-1.86626	0.436033	0.0277141	0.0362003	-530539	Positive	protein_coding	-7917	Distal non-target gene eQTMs
ENSG00000077327	cg12616941	SPAG6	chr10	-5.89886	0.93166	0.00179705	0.00272932	21577	Negative	protein_coding	-7894	Distal non-target gene eQTMs
ENSG00000109572	cg14871650	CLCN3	chr4	128.586	20.4354	5.57e-06	1.09e-05	-7884	Positive	protein_coding	-7884	Distal target gene eQTMs
ENSG00000278012	cg01772014	RP1-310O13.13	chr20	-0.295915	0.0531827	0.00058254	0.00093261	-48111	Negative	sense_intronic	-7842	Distal non-target gene eQTMs
ENSG00000178996	cg14952488	SNX18	chr5	-19.1948	2.90672	5.12e-06	1.01e-05	-7776	Negative	protein_coding	-7776	Distal target gene eQTMs
ENSG00000108830	cg27063449	RND2	chr17	3.18089	0.537282	0.00017633	0.0002975	-378624	Positive	protein_coding	-7764	Distal non-target gene eQTMs
ENSG00000143740	cg00355633	SNAP47	chr1	5.12215	0.422419	9.6e-18	5.83e-17	-7698	Positive	protein_coding	-7698	Distal target gene eQTMs
ENSG00000141448	cg02360939	GATA6	chr18	0.202292	0.037937	0.00038877	0.00063447	-7669	Positive	protein_coding	-7618	Distal target gene eQTMs
ENSG00000060642	cg01681396	PIGV	chr1	1.35854	0.289483	0.00641421	0.00911021	-562159	Positive	protein_coding	-7611	Distal non-target gene eQTMs
ENSG00000197756	cg25108567	RPL37A	chr2	-75.349	4.40594	1.47e-27	2.56e-26	383260	Negative	protein_coding	-7465	Distal non-target gene eQTMs
ENSG00000248483	cg06616408	POU5F2	chr5	0.910616	0.0771482	1.66e-14	7.29e-14	-142422	Positive	protein_coding	-7461	Distal non-target gene eQTMs
ENSG00000124702	cg18802486	KLHDC3	chr6	-10.5638	1.43666	1.72e-07	3.91e-07	-7436	Negative	protein_coding	-7436	Distal target gene eQTMs
ENSG00000180011	cg06615609	ZADH2	chr18	37.4002	4.68308	1.27e-08	3.21e-08	21633	Positive	protein_coding	-7398	Distal target gene eQTMs
ENSG00000198429	cg06382294	ZNF69	chr19	-0.499937	0.0629423	1.96e-07	4.43e-07	-953398	Negative	protein_coding	-7231	Distal non-target gene eQTMs
ENSG00000137522	cg11944287	RNF121	chr11	5.66751	0.701781	5.11e-09	1.34e-08	-892492	Positive	protein_coding	-7202	Distal non-target gene eQTMs
ENSG00000255737	cg22490255	AGAP2-AS1	chr12	1.00407	0.062343	1.19e-25	1.68e-24	-18895	Negative	antisense	-7153	Distal non-target gene eQTMs
ENSG00000105426	cg08951822	PTPRS	chr19	39.6623	1.74822	3.4e-38	2.28e-36	-248266	Positive	protein_coding	-7149	Distal non-target gene eQTMs
ENSG00000127666	cg08951822	TICAM1	chr19	0.858978	0.0604862	2.67e-18	1.72e-17	94297	Negative	protein_coding	-7149	Distal non-target gene eQTMs
ENSG00000226849	cg05390356	RP4-635E18.7	chr1	-0.185846	0.0285177	8.64e-06	1.67e-05	850546	Negative	antisense	-7120	Distal non-target gene eQTMs
ENSG00000237773	cg21094152	AC003075.4	chr7	1.66022	0.102245	2.06e-25	2.81e-24	335277	Negative	antisense	-6975	Distal non-target gene eQTMs
ENSG00000101049	cg02611863	SGK2	chr20	-1.8966	0.173027	6.76e-16	3.4e-15	44512	Negative	protein_coding	-6776	Distal non-target gene eQTMs
ENSG00000068976	cg27275322	PYGM	chr11	6.55849	0.637431	2.8e-10	8.2e-10	349708	Positive	protein_coding	-6773	Distal non-target gene eQTMs
ENSG00000143436	cg09275655	MRPL9	chr1	-3.02265	0.427792	1.27e-06	2.65e-06	-42536	Negative	protein_coding	-6678	Distal non-target gene eQTMs
ENSG00000066056	cg17213946	TIE1	chr1	1.22382	0.149505	3.92e-07	8.61e-07	-230863	Positive	protein_coding	-6658	Distal non-target gene eQTMs
ENSG00000273329	cg16489610	RP11-448A19.1	chr7	-1.91983	0.180149	1.64e-14	7.21e-14	668922	Negative	lincRNA	-6643	Distal non-target gene eQTMs
ENSG00000186591	cg16489610	UBE2H	chr7	-20.9532	2.09198	1.91e-12	6.85e-12	442738	Negative	protein_coding	-6643	Distal non-target gene eQTMs
ENSG00000128607	cg16489610	KLHDC10	chr7	-12.8224	1.31983	3.73e-12	1.3e-11	-202936	Positive	protein_coding	-6643	Distal non-target gene eQTMs
ENSG00000122257	cg09255851	RBBP6	chr16	-27.7428	2.56016	6.88e-14	2.84e-13	-6596	Positive	protein_coding	-6596	Distal target gene eQTMs
ENSG00000271105	cg09255851	SCML2P2	chr16	-0.301092	0.0283757	1.03e-13	4.17e-13	525281	Negative	processed_pseudogene	-6596	Distal non-target gene eQTMs
ENSG00000260072	cg09255851	CTD-2313J23.1	chr16	-0.850706	0.0847386	7.86e-13	2.93e-12	71491	Negative	lincRNA	-6596	Distal non-target gene eQTMs
ENSG00000260448	cg09255851	LCMT1-AS1	chr16	0.333267	0.0302763	2.16e-12	7.71e-12	-540879	Positive	lincRNA	-6596	Distal non-target gene eQTMs
ENSG00000267454	cg20118020	ZNF582-AS1	chr19	-1.42599	0.178334	7.02e-08	1.65e-07	-10854	Negative	lincRNA	-6544	Distal non-target gene eQTMs
ENSG00000183778	cg23372329	B3GALT5	chr21	-1.60486	0.368426	0.0125358	0.017116	-6541	Negative	protein_coding	-6541	Distal target gene eQTMs
ENSG00000135407	cg15357934	AVIL	chr12	-2.61902	0.59319	0.015914	0.0214338	-52839	Negative	protein_coding	-6524	Distal non-target gene eQTMs
ENSG00000077232	cg11166746	DNAJC10	chr2	-15.3748	1.93238	6.19e-09	1.61e-08	-407937	Negative	protein_coding	-6465	Distal non-target gene eQTMs
ENSG00000226581	cg11629481	RP11-340I6.8	chr7	0.607939	0.0359937	2.09e-30	4.95e-29	-413607	Positive	lincRNA	-6461	Distal non-target gene eQTMs
ENSG00000179922	cg26775079	ZNF784	chr19	2.96905	0.365038	9.24e-09	2.36e-08	26722	Positive	protein_coding	-6402	Distal non-target gene eQTMs
ENSG00000147789	cg01978246	ZNF7	chr8	3.27691	0.355699	2.6e-11	8.38e-11	303072	Positive	protein_coding	-6400	Distal non-target gene eQTMs
ENSG00000259133	cg26972272	RP11-1085N6.3	chr14	-0.370296	0.0835004	0.00465227	0.00672343	167899	Negative	antisense	-6385	Distal non-target gene eQTMs
ENSG00000120725	cg21778810	SIL1	chr5	1.68379	0.131129	2.55e-18	1.64e-17	1167371	Positive	protein_coding	-6318	Distal non-target gene eQTMs
ENSG00000279672	cg01741372	CMB9-55F22.1	chr11	1.34397	0.179149	5.15e-07	1.12e-06	-4272	Positive	TEC	-6311	Distal non-target gene eQTMs
ENSG00000124608	cg12362502	AARS2	chr6	-8.51838	0.663979	1.53e-19	1.11e-18	-662924	Negative	protein_coding	-6267	Distal non-target gene eQTMs
ENSG00000146232	cg12362502	NFKBIE	chr6	-1.16764	0.123485	3.24e-11	1.03e-10	-622359	Negative	protein_coding	-6267	Distal non-target gene eQTMs
ENSG00000096080	cg12362502	MRPS18A	chr6	-3.21266	0.396074	2.89e-08	7.06e-08	-35496	Negative	protein_coding	-6267	Distal non-target gene eQTMs
ENSG00000213462	cg04834097	ERV3-1	chr7	-5.57829	0.602934	8.69e-12	2.93e-11	-676656	Positive	protein_coding	-6241	Distal non-target gene eQTMs
ENSG00000152926	cg04834097	ZNF117	chr7	-15.2185	1.77463	2.51e-09	6.77e-09	-658076	Positive	protein_coding	-6241	Distal non-target gene eQTMs
ENSG00000148468	cg00465337	FAM171A1	chr10	-1.72322	0.23124	3.22e-07	7.12e-07	-108301	Negative	protein_coding	-6162	Distal non-target gene eQTMs
ENSG00000256235	cg03900808	SMIM3	chr5	18.2434	3.99656	0.0171303	0.0229523	286055	Negative	protein_coding	-6073	Distal non-target gene eQTMs
ENSG00000111843	cg14009588	TMEM14C	chr6	-6.04894	0.514378	4.5e-18	2.8e-17	307517	Positive	protein_coding	-6058	Distal non-target gene eQTMs
ENSG00000137210	cg14009588	TMEM14B	chr6	-14.4789	1.26032	3.17e-17	1.81e-16	332361	Negative	protein_coding	-6058	Distal non-target gene eQTMs
ENSG00000142949	cg13233799	PTPRF	chr1	124.07	12.6762	7.52e-12	2.55e-11	-5887	Positive	protein_coding	-5887	Distal target gene eQTMs
ENSG00000145362	cg05024939	ANK2	chr4	-281.404	44.0727	5.7e-06	1.12e-05	297014	Negative	protein_coding	-5710	Distal non-target gene eQTMs
ENSG00000272033	cg12933719	RP11-52A20.2	chr1	1.00818	0.10814	1.07e-07	2.47e-07	152930	Negative	sense_intronic	-5666	Distal non-target gene eQTMs
ENSG00000171960	cg07532155	PPIH	chr1	-1.83634	0.166474	1.17e-14	5.21e-14	-872344	Negative	protein_coding	-5580	Distal non-target gene eQTMs
ENSG00000164010	cg07532155	ERMAP	chr1	-3.19077	0.304593	9.15e-14	3.72e-13	-713645	Negative	protein_coding	-5580	Distal non-target gene eQTMs
ENSG00000159479	cg07532155	MED8	chr1	-9.07466	1.07689	9.05e-10	2.54e-09	146850	Negative	protein_coding	-5580	Distal non-target gene eQTMs
ENSG00000110756	cg13747648	HPS5	chr11	-8.09992	0.794021	9.24e-14	3.76e-13	419976	Positive	protein_coding	-5522	Distal non-target gene eQTMs
ENSG00000114316	cg10546523	USP4	chr3	13.1263	0.857892	8.96e-25	1.14e-23	995222	Positive	protein_coding	-5495	Distal non-target gene eQTMs
ENSG00000278249	cg12014643	SCARNA2	chr1	0.467521	0.0350697	3.98e-16	2.04e-15	-212239	Positive	scaRNA	-5391	Distal non-target gene eQTMs
ENSG00000177981	cg07419191	ASB8	chr12	-24.6108	3.37684	8.18e-08	1.92e-07	-388486	Negative	protein_coding	-5387	Distal non-target gene eQTMs
ENSG00000117410	cg04563783	ATP6V0B	chr1	15.5877	2.83809	0.00034256	0.00056198	22591	Positive	protein_coding	-5345	Distal non-target gene eQTMs
ENSG00000152763	cg00295421	WDR78	chr1	2.51254	0.305905	3.08e-09	8.25e-09	117351	Positive	protein_coding	-5341	Distal non-target gene eQTMs
ENSG00000144134	cg08231831	RABL2A	chr2	-7.86885	0.694442	8.4e-18	5.13e-17	999759	Negative	protein_coding	-5303	Distal non-target gene eQTMs
ENSG00000237753	cg08231831	AC079922.3	chr2	-0.564203	0.0718641	3.76e-09	9.99e-09	-14362	Negative	lincRNA	-5303	Distal non-target gene eQTMs
ENSG00000188026	cg22040239	RILPL1	chr12	-4.41025	0.377447	2.87e-16	1.49e-15	-81077	Negative	protein_coding	-5204	Distal non-target gene eQTMs
ENSG00000176593	cg09464061	CTD-2368P22.1	chr19	-2.78319	0.330376	9.96e-09	2.54e-08	-576624	Negative	processed_transcript	-5182	Distal non-target gene eQTMs
ENSG00000258636	cg09965733	CTD-2298J14.2	chr14	0.679671	0.0506711	8.36e-22	7.66e-21	26271	Positive	lincRNA	-5072	Distal target gene eQTMs
ENSG00000180185	cg19439687	FAHD1	chr16	-2.90197	0.628727	0.0163463	0.0219654	512991	Negative	protein_coding	-5070	Distal non-target gene eQTMs
ENSG00000104783	cg21194911	KCNN4	chr19	0.8344	0.141194	0.0001649	0.00027905	446047	Positive	protein_coding	-5033	Distal non-target gene eQTMs
ENSG00000258653	cg23367119	RP5-1021I20.4	chr14	-1.16577	0.257815	0.00984188	0.0136337	88261	Negative	protein_coding	-4963	Distal non-target gene eQTMs
ENSG00000197182	cg18746040	MIRLET7BHG	chr22	-2.24281	0.260717	1.25e-08	3.16e-08	-281893	Negative	lincRNA	-4887	Distal non-target gene eQTMs
ENSG00000105612	cg26715644	DNASE2	chr19	3.39958	0.430066	1.16e-07	2.68e-07	-44614	Positive	protein_coding	-4884	Distal non-target gene eQTMs
ENSG00000122140	cg06046617	MRPS2	chr9	4.14894	0.224475	5.13e-30	1.15e-28	-4855	Positive	protein_coding	-4855	Distal target gene eQTMs
ENSG00000107551	cg26717206	RASSF4	chr10	-55.6617	10.8293	0.0013737	0.00210982	-4845	Negative	protein_coding	-4845	Distal target gene eQTMs
ENSG00000147548	cg19077071	WHSC1L1	chr8	30.5308	2.02848	1.23e-23	1.38e-22	117393	Positive	protein_coding	-4825	Distal target gene eQTMs
ENSG00000115053	cg15286942	NCL	chr2	60.3152	6.42249	2.17e-12	7.75e-12	-735897	Positive	protein_coding	-4789	Distal non-target gene eQTMs
ENSG00000115556	cg21295476	PLCD4	chr2	-142.229	13.9738	4.21e-12	1.46e-11	-372319	Negative	protein_coding	-4781	Distal non-target gene eQTMs
ENSG00000163482	cg21295476	STK36	chr2	-24.104	2.66462	5.92e-07	1.28e-06	-308105	Negative	protein_coding	-4781	Distal non-target gene eQTMs
ENSG00000107960	cg25958158	OBFC1	chr10	2.54221	0.134314	9.18e-33	2.84e-31	-595658	Positive	protein_coding	-4748	Distal non-target gene eQTMs
ENSG00000185988	cg11876574	PLK5	chr19	1.65211	0.139318	2.73e-09	7.34e-09	-233040	Positive	protein_coding	-4741	Distal non-target gene eQTMs
ENSG00000162430	cg20385686	SEPN1	chr1	44.9618	3.83767	1.42e-12	5.16e-12	-897784	Positive	protein_coding	-4724	Distal non-target gene eQTMs
ENSG00000101236	cg25468662	RNF24	chr20	13.0942	2.57487	0.00209667	0.00315839	-762719	Positive	protein_coding	-4693	Distal non-target gene eQTMs
ENSG00000186105	cg21185661	LRRC70	chr5	-0.577895	0.0783231	1.68e-07	3.83e-07	267970	Negative	protein_coding	-4687	Distal non-target gene eQTMs
ENSG00000171444	cg23497707	MCC	chr5	3.59228	0.855713	0.013599	0.0184814	-309972	Positive	protein_coding	-4629	Distal non-target gene eQTMs
ENSG00000197083	cg21101222	ZNF300P1	chr5	9.63565	1.32552	6.06e-06	1.19e-05	827955	Positive	transcribed_unprocessed_pseudogene	-4608	Distal non-target gene eQTMs
ENSG00000167566	cg09275968	NCKAP5L	chr12	5.65448	0.377015	7.13e-24	8.21e-23	-972749	Negative	protein_coding	-4603	Distal non-target gene eQTMs
ENSG00000139620	cg09275968	KANSL2	chr12	-3.91535	0.284736	8.36e-22	7.66e-21	164996	Positive	protein_coding	-4603	Distal non-target gene eQTMs
ENSG00000269897	cg10091662	COMMD3-BMI1	chr10	5.17905	0.505831	1.91e-13	7.55e-13	-4580	Positive	protein_coding	-4580	Distal target gene eQTMs
ENSG00000067369	cg14205524	TP53BP1	chr15	-17.7147	1.18401	4.73e-23	4.99e-22	-907313	Positive	protein_coding	-4515	Distal non-target gene eQTMs
ENSG00000128881	cg14205524	TTBK2	chr15	-26.7205	2.00219	3.73e-19	2.59e-18	-242982	Negative	protein_coding	-4515	Distal non-target gene eQTMs
ENSG00000159433	cg14205524	STARD9	chr15	-53.4461	4.26517	7.8e-16	3.9e-15	79858	Negative	protein_coding	-4515	Distal non-target gene eQTMs
ENSG00000205189	cg27415032	ZBTB10	chr8	5.41339	0.953923	8.17e-05	0.00014287	400330	Positive	protein_coding	-4514	Distal non-target gene eQTMs
ENSG00000174695	cg06505989	TMEM167A	chr5	-24.1325	2.71244	8.71e-11	2.67e-10	423073	Negative	protein_coding	-4454	Distal non-target gene eQTMs
ENSG00000186235	cg14359659	AC016757.3	chr2	-1.24351	0.175424	1.1e-05	2.1e-05	-61150	Negative	processed_transcript	-4420	Distal non-target gene eQTMs
ENSG00000250644	cg13117112	RP11-295K3.1	chr11	4.63352	0.23274	4.93e-31	1.25e-29	97864	Negative	protein_coding	-4378	Distal non-target gene eQTMs
ENSG00000184545	cg13117112	DUSP8	chr11	38.7494	2.27768	3.33e-26	4.98e-25	278634	Negative	protein_coding	-4378	Distal non-target gene eQTMs
ENSG00000183020	cg13117112	AP2A2	chr11	24.2078	1.79566	5.48e-20	4.16e-19	-907791	Positive	protein_coding	-4378	Distal non-target gene eQTMs
ENSG00000101544	cg12964741	ADNP2	chr18	-5.24802	1.1313	0.010789	0.0148777	709041	Negative	protein_coding	-4365	Distal non-target gene eQTMs
ENSG00000245552	cg07131200	RP11-712B9.2	chr11	-0.236966	0.0594395	0.0372897	0.047816	-643780	Negative	antisense	-4354	Distal non-target gene eQTMs
ENSG00000152556	cg12798245	PFKM	chr12	12.7334	2.3755	0.00071252	0.00113009	346876	Negative	protein_coding	-4347	Distal non-target gene eQTMs
ENSG00000113645	cg08568649	WWC1	chr5	-10.9708	2.17526	0.00244584	0.00365649	-4341	Negative	protein_coding	-4341	Distal target gene eQTMs
ENSG00000158859	cg18450905	ADAMTS4	chr1	11.4072	2.08387	0.0164396	0.0220841	541586	Positive	protein_coding	-4325	Distal non-target gene eQTMs
ENSG00000186806	cg11681192	VSIG10L	chr19	-2.02328	0.227094	1.77e-08	4.41e-08	862769	Negative	protein_coding	-4266	Distal non-target gene eQTMs
ENSG00000272668	cg24580655	RP11-190A12.8	chr1	7.50842	0.421513	4.74e-26	6.95e-25	679022	Positive	antisense	-4239	Distal non-target gene eQTMs
ENSG00000197299	cg10698959	BLM	chr15	-5.71705	0.928759	0.00010264	0.00017757	-155484	Negative	protein_coding	-4238	Distal non-target gene eQTMs
ENSG00000271862	cg21594702	RP11-343L5.2	chr5	-0.187064	0.0368785	0.0006538	0.001041	426318	Negative	lincRNA	-4229	Distal non-target gene eQTMs
ENSG00000156414	cg11177858	TDRD9	chr14	-3.24458	0.478793	0.00046457	0.00075187	-4230	Negative	protein_coding	-4224	Distal target gene eQTMs
ENSG00000279311	cg16005127	RP11-170K4.2	chr3	0.290435	0.0363403	1.98e-09	5.39e-09	759854	Positive	TEC	-4189	Distal non-target gene eQTMs
ENSG00000182208	cg20856161	MOB2	chr11	5.60221	0.548096	3.05e-13	1.18e-12	363026	Positive	protein_coding	-4176	Distal non-target gene eQTMs
ENSG00000110651	cg20856161	CD81	chr11	51.1379	4.92382	1.07e-11	3.59e-11	543694	Positive	protein_coding	-4176	Distal non-target gene eQTMs
ENSG00000177700	cg20856161	POLR2L	chr11	4.95855	0.693498	8.74e-07	1.85e-06	995127	Negative	protein_coding	-4176	Distal non-target gene eQTMs
ENSG00000184110	cg19480171	EIF3C	chr16	40.5539	4.19037	1.56e-12	5.65e-12	-194018	Positive	protein_coding	-4171	Distal non-target gene eQTMs
ENSG00000132510	cg19364064	KDM6B	chr17	-27.9207	2.42607	3.86e-14	1.63e-13	189119	Positive	protein_coding	-4158	Distal non-target gene eQTMs
ENSG00000154721	cg01975706	JAM2	chr21	-3.25465	0.621225	0.00055048	0.00088363	-4164	Negative	protein_coding	-4150	Distal target gene eQTMs
ENSG00000272884	cg00458274	RP11-104H15.10	chr17	-1.21306	0.220315	0.00223588	0.00335601	-567216	Negative	processed_transcript	-4128	Distal non-target gene eQTMs
ENSG00000267709	cg18006622	AC024592.9	chr19	-0.613117	0.0879302	0.00042773	0.00069554	-4126	Negative	antisense	-4126	Distal target gene eQTMs
ENSG00000178233	cg14593314	TMEM151B	chr6	7.60504	0.889022	3.89e-09	1.03e-08	46891	Positive	protein_coding	-4070	Distal non-target gene eQTMs
ENSG00000171453	cg14593314	POLR1C	chr6	-2.60226	0.386692	2.13e-06	4.35e-06	-713873	Negative	protein_coding	-4070	Distal non-target gene eQTMs
ENSG00000174586	cg00577109	ZNF497	chr19	0.905144	0.112416	1.37e-08	3.45e-08	208783	Positive	protein_coding	-4011	Distal non-target gene eQTMs
ENSG00000283154	cg08134622	IQCJ-SCHIP1	chr3	5.83894	0.171902	7.45e-58	1.19e-54	852430	Positive	protein_coding	-3950	Distal non-target gene eQTMs
ENSG00000178053	cg08134622	MLF1	chr3	-9.63778	0.816415	3.27e-18	2.08e-17	461358	Positive	protein_coding	-3950	Distal non-target gene eQTMs
ENSG00000168827	cg08134622	GFM1	chr3	-16.4434	1.49556	2.59e-16	1.36e-15	534473	Negative	protein_coding	-3950	Distal non-target gene eQTMs
ENSG00000150433	cg13479898	TMEM218	chr11	10.9386	0.702812	5.34e-25	6.96e-24	791006	Positive	protein_coding	-3937	Distal non-target gene eQTMs
ENSG00000149548	cg13479898	CCDC15	chr11	2.629	0.366333	6.8e-07	1.46e-06	-933430	Positive	protein_coding	-3937	Distal non-target gene eQTMs
ENSG00000063244	cg23537415	U2AF2	chr19	24.7281	2.47177	4.12e-13	1.58e-12	-3933	Positive	protein_coding	-3933	Distal target gene eQTMs
ENSG00000070886	cg05941864	EPHA8	chr1	-8.27022	1.08662	1.11e-06	2.33e-06	-3996	Negative	protein_coding	-3921	Distal target gene eQTMs
ENSG00000067601	cg23308417	PMS2P4	chr7	0.657587	0.158941	0.00953749	0.013235	-654826	Positive	transcribed_unprocessed_pseudogene	-3834	Distal non-target gene eQTMs
ENSG00000141510	cg09566763	TP53	chr17	3.3577	0.218123	5.4e-21	4.52e-20	-11337	Positive	protein_coding	-3815	Distal non-target gene eQTMs
ENSG00000245904	cg02190235	RP11-796E2.4	chr12	-0.461079	0.104525	0.00728211	0.0102649	-857410	Negative	antisense	-3765	Distal non-target gene eQTMs
ENSG00000204054	cg13693256	LINC00963	chr9	-6.1549	1.0392	0.00014076	0.00023965	140914	Negative	processed_transcript	-3732	Distal non-target gene eQTMs
ENSG00000042493	cg06897686	CAPG	chr2	6.0114	0.981584	4.39e-05	7.87e-05	360321	Positive	protein_coding	-3730	Distal non-target gene eQTMs
ENSG00000085449	cg07604043	WDFY1	chr2	8.48131	1.3993	0.00021303	0.00035641	-991062	Positive	protein_coding	-3720	Distal non-target gene eQTMs
ENSG00000100567	cg10112672	PSMA3	chr14	-9.73588	0.652972	2.96e-25	3.96e-24	-392835	Negative	protein_coding	-3711	Distal non-target gene eQTMs
ENSG00000050130	cg10112672	JKAMP	chr14	-9.56501	0.880237	8.84e-15	3.99e-14	846765	Negative	protein_coding	-3711	Distal non-target gene eQTMs
ENSG00000131966	cg10112672	ACTR10	chr14	-10.834	1.10503	4.68e-12	1.61e-11	-437598	Negative	protein_coding	-3711	Distal non-target gene eQTMs
ENSG00000100575	cg10112672	TIMM9	chr14	-1.64676	0.229589	2.51e-07	5.6e-07	229183	Positive	protein_coding	-3711	Distal non-target gene eQTMs
ENSG00000267543	cg02824099	RP11-666A8.7	chr17	12.927	2.33865	0.00041061	0.00066893	18678	Positive	sense_intronic	-3687	Distal non-target gene eQTMs
ENSG00000112130	cg17964532	RNF8	chr6	5.08422	0.639345	7.52e-09	1.94e-08	673862	Positive	protein_coding	-3657	Distal non-target gene eQTMs
ENSG00000251321	cg01332286	PCAT4	chr4	-5.18166	0.528362	2.59e-12	9.17e-12	-3649	Negative	lincRNA	-3649	Distal target gene eQTMs
ENSG00000250565	cg25225793	ATP6V1E2	chr2	1.39502	0.227817	3.24e-05	5.9e-05	-193459	Positive	protein_coding	-3624	Distal non-target gene eQTMs
ENSG00000064687	cg04687437	ABCA7	chr19	-240.822	31.739	2.12e-06	4.33e-06	528988	Negative	protein_coding	-3616	Distal non-target gene eQTMs
ENSG00000177383	cg04832318	MAGEF1	chr3	9.29947	1.11992	3.47e-09	9.25e-09	875668	Positive	protein_coding	-3539	Distal non-target gene eQTMs
ENSG00000173575	cg09680926	CHD2	chr15	-26.3635	2.24593	1.73e-16	9.21e-16	13997	Negative	protein_coding	-3485	Distal non-target gene eQTMs
ENSG00000204052	cg18956706	LRRC73	chr6	1.68521	0.106141	6.05e-25	7.82e-24	-259857	Positive	protein_coding	-3432	Distal non-target gene eQTMs
ENSG00000140876	cg04260557	NUDT7	chr16	-1.00412	0.228048	0.00665882	0.0094302	-69439	Negative	protein_coding	-3401	Distal non-target gene eQTMs
ENSG00000263563	cg21767373	UBBP4	chr17	1.72404	0.0690267	2.89e-43	3.85e-41	963989	Positive	transcribed_unprocessed_pseudogene	-3390	Distal non-target gene eQTMs
ENSG00000134014	cg25298650	ELP3	chr8	2.29614	0.440894	0.00064781	0.00103184	-3326	Positive	protein_coding	-3326	Distal target gene eQTMs
ENSG00000120899	cg25298650	PTK2B	chr8	-2.79027	0.447997	1.36e-05	2.57e-05	-781517	Negative	protein_coding	-3326	Distal non-target gene eQTMs
ENSG00000278834	cg17745602	RP11-458J1.1	chr17	0.874232	0.0657184	4.9e-19	3.37e-18	335828	Positive	antisense	-3280	Distal non-target gene eQTMs
ENSG00000137462	cg17898329	TLR2	chr4	-3.31953	0.398325	1.86e-08	4.63e-08	-108274	Negative	protein_coding	-3224	Distal non-target gene eQTMs
ENSG00000095015	cg15154546	MAP3K1	chr5	-43.8284	5.40141	6.7e-09	1.74e-08	-3241	Negative	protein_coding	-3216	Distal target gene eQTMs
ENSG00000182179	cg21616626	UBA7	chr3	-3.59158	0.632866	0.00021012	0.0003516	-333322	Positive	protein_coding	-3184	Distal non-target gene eQTMs
ENSG00000241837	cg10364942	ATP5O	chr21	-30.5836	1.48178	1.9e-36	1.01e-34	-874560	Negative	protein_coding	-3048	Distal non-target gene eQTMs
ENSG00000205758	cg10364942	CRYZL1	chr21	-12.2913	0.771675	4.01e-25	5.29e-24	-560448	Negative	protein_coding	-3048	Distal non-target gene eQTMs
ENSG00000159086	cg10364942	PAXBP1	chr21	-32.4512	2.06191	4.06e-25	5.36e-24	294994	Positive	protein_coding	-3048	Distal non-target gene eQTMs
ENSG00000159147	cg10364942	DONSON	chr21	-6.83207	0.444699	2.15e-24	2.62e-23	-530649	Positive	protein_coding	-3048	Distal non-target gene eQTMs
ENSG00000170262	cg10364942	MRAP	chr21	0.574431	0.06331	3.54e-07	7.8e-07	-737080	Negative	protein_coding	-3048	Distal non-target gene eQTMs
ENSG00000169047	cg07435537	IRS1	chr2	3.96397	0.311941	1.12e-18	7.42e-18	71479	Positive	protein_coding	-3037	Distal target gene eQTMs
ENSG00000112695	cg14861678	COX7A2	chr6	-26.8968	1.14414	3.4e-44	5.29e-42	-28590	Negative	protein_coding	-3034	Distal non-target gene eQTMs
ENSG00000213341	cg22735222	CHUK	chr10	-10.5819	0.885283	2.74e-15	1.3e-14	-652333	Negative	protein_coding	-3034	Distal non-target gene eQTMs
ENSG00000267260	cg03601372	CTD-2162K18.4	chr19	-0.527926	0.0735723	1.99e-06	4.08e-06	-3012	Negative	lincRNA	-2971	Distal target gene eQTMs
ENSG00000197217	cg00140501	ENTPD4	chr8	25.6507	2.70826	3.07e-12	1.08e-11	-139259	Positive	protein_coding	-2887	Distal non-target gene eQTMs
ENSG00000196776	cg08932533	CD47	chr3	-72.1015	5.95317	1.01e-19	7.47e-19	50820	Negative	protein_coding	-2886	Distal target gene eQTMs
ENSG00000151006	cg01517593	PRSS53	chr16	-5.01759	0.802573	0.00018456	0.00031066	-966693	Negative	protein_coding	-2876	Distal non-target gene eQTMs
ENSG00000255284	cg07407859	AP006621.5	chr11	-1.24567	0.188283	0.00013121	0.00022419	-44199	Negative	lincRNA	-2875	Distal non-target gene eQTMs
ENSG00000169738	cg12363726	DCXR	chr17	-7.77912	0.812366	3.79e-09	1.01e-08	-997394	Negative	protein_coding	-2861	Distal non-target gene eQTMs
ENSG00000137992	cg03050965	DBT	chr1	2.50036	0.551184	0.00849091	0.0118632	1052762	Positive	protein_coding	-2793	Distal non-target gene eQTMs
ENSG00000157510	cg17680092	AFAP1L1	chr5	-5.54696	1.11259	0.0175062	0.0234255	127624	Negative	protein_coding	-2752	Distal non-target gene eQTMs
ENSG00000251200	cg04172548	RP11-6E9.5	chr4	-5.49106	0.505384	4.8e-15	2.22e-14	-2722	Negative	antisense	-2722	Distal target gene eQTMs
ENSG00000146648	cg21773142	EGFR	chr7	24.1761	4.51788	0.00074832	0.00118452	474001	Positive	protein_coding	-2691	Distal non-target gene eQTMs
ENSG00000117013	cg14182166	KCNQ4	chr1	-6.81188	0.694566	1.17e-10	3.55e-10	740891	Negative	protein_coding	-2663	Distal non-target gene eQTMs
ENSG00000139725	cg13717333	RHOF	chr12	-2.21291	0.269433	1.46e-08	3.66e-08	244306	Negative	protein_coding	-2638	Distal non-target gene eQTMs
ENSG00000140443	cg18742438	IGF1R	chr15	61.4859	8.6383	9.78e-07	2.06e-06	-452316	Positive	protein_coding	-2638	Distal non-target gene eQTMs
ENSG00000278864	cg27223681	RP11-45M22.2	chr17	-2.3425	0.183741	1.06e-19	7.82e-19	136321	Positive	TEC	-2638	Distal non-target gene eQTMs
ENSG00000263006	cg27283457	ROCK1P1	chr18	-3.05384	0.445905	2.13e-06	4.35e-06	-2611	Negative	transcribed_unprocessed_pseudogene	-2611	Distal target gene eQTMs
ENSG00000196678	cg11869721	ERI2	chr16	3.34251	0.289151	9.37e-17	5.13e-16	819608	Negative	protein_coding	-2583	Distal non-target gene eQTMs
ENSG00000165588	cg24279288	OTX2	chr14	-77.5888	7.17986	6.21e-16	3.13e-15	13140	Negative	protein_coding	-2566	Distal target gene eQTMs
ENSG00000040608	cg25650110	RTN4R	chr22	-3.89643	0.189067	6.25e-33	1.99e-31	-109475	Positive	protein_coding	-2484	Promoter non-target gene eQTMs
ENSG00000100075	cg25650110	SLC25A1	chr22	-4.88272	0.33532	2.25e-22	2.2e-21	956359	Positive	protein_coding	-2484	Promoter non-target gene eQTMs
ENSG00000170473	cg25245322	PYM1	chr12	2.18203	0.341376	9.61e-06	1.85e-05	322999	Positive	protein_coding	-2479	Promoter non-target gene eQTMs
ENSG00000258227	cg01184930	CLEC5A	chr7	-1.41485	0.239084	0.00027869	0.00046094	-850655	Positive	protein_coding	-2470	Promoter non-target gene eQTMs
ENSG00000233264	cg07107420	AC006042.8	chr7	-0.384122	0.0489986	1.25e-08	3.16e-08	9049	Negative	processed_pseudogene	-2469	Promoter non-target gene eQTMs
ENSG00000138079	cg04881214	SLC3A1	chr2	-0.786029	0.0996275	9.25e-08	2.16e-07	106733	Positive	protein_coding	-2459	Promoter non-target gene eQTMs
ENSG00000158050	cg13112407	DUSP2	chr2	-1.30602	0.150105	6.07e-06	1.19e-05	396025	Negative	protein_coding	-2451	Promoter non-target gene eQTMs
ENSG00000197324	cg25391846	LRP10	chr14	18.4242	1.7933	1.7e-11	5.57e-11	392987	Positive	protein_coding	-2447	Promoter non-target gene eQTMs
ENSG00000125611	cg09982942	CHCHD5	chr2	-2.47021	0.193012	7.21e-19	4.86e-18	443417	Positive	protein_coding	-2438	Promoter non-target gene eQTMs
ENSG00000223959	cg20974817	AFG3L1P	chr16	8.59945	1.21258	5.32e-07	1.15e-06	249748	Negative	unitary_pseudogene	-2438	Promoter non-target gene eQTMs
ENSG00000173714	cg03418876	WFIKKN2	chr17	0.976733	0.158613	0.00030146	0.00049725	112671	Negative	protein_coding	-2435	Promoter non-target gene eQTMs
ENSG00000169981	cg27606567	ZNF35	chr3	1.32588	0.109141	2.21e-18	1.43e-17	649413	Negative	protein_coding	-2423	Promoter non-target gene eQTMs
ENSG00000185219	cg27606567	ZNF445	chr3	9.89012	0.820365	6.37e-18	3.93e-17	-432386	Positive	protein_coding	-2423	Promoter non-target gene eQTMs
ENSG00000256269	cg16169193	HMBS	chr11	-5.47811	1.09206	0.00190922	0.00288841	-2418	Negative	protein_coding	-2418	Promoter-eQTMs
ENSG00000186166	cg16169193	CCDC84	chr11	-10.6177	2.17527	0.015044	0.0203211	-89146	Negative	protein_coding	-2418	Promoter non-target gene eQTMs
ENSG00000170088	cg05119988	TMEM192	chr4	2.20612	0.356237	6.79e-06	1.32e-05	259429	Positive	protein_coding	-2414	Promoter non-target gene eQTMs
ENSG00000113810	cg02470874	SMC4	chr3	20.6263	2.72448	6.68e-08	1.58e-07	-358274	Positive	protein_coding	-2406	Promoter non-target gene eQTMs
ENSG00000173227	cg24357714	SYT12	chr11	1.01919	0.150192	5.88e-05	0.00010423	-501891	Positive	protein_coding	-2406	Promoter non-target gene eQTMs
ENSG00000104888	cg27321942	SLC17A7	chr19	-148.296	32.0213	0.0158697	0.0213757	60559	Positive	protein_coding	-2406	Promoter non-target gene eQTMs
ENSG00000198028	cg22853064	ZNF560	chr19	-0.902099	0.128898	1.19e-06	2.49e-06	825873	Negative	protein_coding	-2399	Promoter non-target gene eQTMs
ENSG00000173320	cg14865309	STOX2	chr4	-7.66321	1.71578	0.0120213	0.0164544	290300	Negative	protein_coding	-2398	Promoter non-target gene eQTMs
ENSG00000196456	cg24092393	ZNF775	chr7	2.51753	0.159721	3.99e-24	4.74e-23	-714470	Positive	protein_coding	-2394	Promoter non-target gene eQTMs
ENSG00000127399	cg24092393	LRRC61	chr7	1.82483	0.16288	3.34e-14	1.42e-13	-759997	Positive	protein_coding	-2394	Promoter non-target gene eQTMs
ENSG00000138381	cg11185688	ASNSD1	chr2	-18.253	1.49101	3.05e-17	1.75e-16	-2390	Negative	protein_coding	-2390	Promoter-eQTMs
ENSG00000187650	cg11696861	VMAC	chr19	1.15847	0.12815	1.8e-09	4.92e-09	-835128	Positive	protein_coding	-2383	Promoter non-target gene eQTMs
ENSG00000129673	cg25583580	AANAT	chr17	12.9225	0.790319	1.51e-21	1.34e-20	-282000	Negative	protein_coding	-2373	Promoter non-target gene eQTMs
ENSG00000272386	cg25583580	RP11-666A8.12	chr17	-6.02646	0.565779	7.71e-13	2.88e-12	-183999	Positive	sense_intronic	-2373	Promoter non-target gene eQTMs
ENSG00000161533	cg25583580	ACOX1	chr17	10.0912	1.03024	7.35e-11	2.27e-10	793844	Positive	protein_coding	-2373	Promoter non-target gene eQTMs
ENSG00000106336	cg15202251	FBXO24	chr7	-0.418898	0.0787268	0.00094128	0.00147298	-2367	Negative	protein_coding	-2367	Promoter-eQTMs
ENSG00000146830	cg15202251	GIGYF1	chr7	-54.8263	2.7184	6.9e-35	2.94e-33	-93158	Negative	protein_coding	-2367	Promoter non-target gene eQTMs
ENSG00000172354	cg15202251	GNB2	chr7	-38.2924	2.4511	9.64e-23	9.78e-22	87218	Negative	protein_coding	-2367	Promoter non-target gene eQTMs
ENSG00000146828	cg15202251	SLC12A9	chr7	-6.70428	0.755428	1.09e-09	3.04e-09	240471	Negative	protein_coding	-2367	Promoter non-target gene eQTMs
ENSG00000214253	cg15202251	FIS1	chr7	-11.1628	1.44077	1.8e-07	4.09e-07	-653109	Negative	protein_coding	-2367	Promoter non-target gene eQTMs
ENSG00000126107	cg10224098	HECTD3	chr1	5.54915	0.49297	1.59e-15	7.71e-15	-594983	Positive	protein_coding	-2363	Promoter non-target gene eQTMs
ENSG00000220205	cg06935501	VAMP2	chr17	350.893	31.7022	1.23e-12	4.51e-12	-301744	Negative	protein_coding	-2340	Promoter non-target gene eQTMs
ENSG00000183570	cg13481379	PCBP3	chr21	59.1233	2.99336	1.24e-33	4.44e-32	-2315	Negative	protein_coding	-2315	Promoter-eQTMs
ENSG00000173638	cg13481379	SLC19A1	chr21	4.58771	0.248111	3.72e-31	9.56e-30	152437	Negative	protein_coding	-2315	Promoter non-target gene eQTMs
ENSG00000142156	cg13481379	COL6A1	chr21	22.7425	1.2273	2.43e-28	4.59e-27	335728	Positive	protein_coding	-2315	Promoter non-target gene eQTMs
ENSG00000182871	cg13481379	COL18A1	chr21	75.4317	4.45739	1.51e-25	2.1e-24	-240844	Positive	protein_coding	-2315	Promoter non-target gene eQTMs
ENSG00000197381	cg13481379	ADARB1	chr21	25.1047	2.23565	1.18e-14	5.26e-14	-572156	Positive	protein_coding	-2315	Promoter non-target gene eQTMs
ENSG00000160298	cg13481379	C21orf58	chr21	1.35999	0.129756	3.34e-14	1.42e-13	-654172	Positive	protein_coding	-2315	Promoter non-target gene eQTMs
ENSG00000235374	cg13481379	SSR4P1	chr21	0.671559	0.0628023	3.11e-13	1.21e-12	575057	Positive	transcribed_processed_pseudogene	-2315	Promoter non-target gene eQTMs
ENSG00000153208	cg08740967	MERTK	chr2	-9.26607	1.26554	1.18e-06	2.47e-06	-725999	Negative	protein_coding	-2311	Promoter non-target gene eQTMs
ENSG00000175193	cg09948343	PARL	chr3	7.95381	1.64518	0.005233	0.00751758	308037	Negative	protein_coding	-2270	Promoter non-target gene eQTMs
ENSG00000106462	cg19391535	EZH2	chr7	-4.40449	0.260599	2.98e-27	5.01e-26	-106455	Negative	protein_coding	-2264	Promoter non-target gene eQTMs
ENSG00000259326	cg20880835	RP11-102L12.2	chr15	-0.399923	0.0679738	4.57e-05	8.18e-05	248276	Positive	antisense	-2251	Promoter non-target gene eQTMs
ENSG00000171262	cg20880835	FAM98B	chr15	-5.19395	0.925801	0.00011586	0.00019917	199550	Negative	protein_coding	-2251	Promoter non-target gene eQTMs
ENSG00000140153	cg08593712	WDR20	chr14	9.85499	0.929808	1.35e-13	5.4e-13	-180112	Negative	protein_coding	-2238	Promoter non-target gene eQTMs
ENSG00000149050	cg10253640	ZNF214	chr11	-1.74001	0.174731	2.88e-12	1.02e-11	517667	Negative	protein_coding	-2237	Promoter non-target gene eQTMs
ENSG00000143995	cg01406988	MEIS1	chr2	-14.3584	1.62835	1.23e-11	4.09e-11	-2226	Negative	protein_coding	-2226	Promoter-eQTMs
ENSG00000255468	cg04073608	RP11-867G23.8	chr11	1.26485	0.0539781	1.04e-37	6.57e-36	847321	Positive	antisense	-2224	Promoter non-target gene eQTMs
ENSG00000204178	cg11240755	TMEM57	chr1	-2.76088	0.477808	0.00089742	0.00140673	-389999	Negative	protein_coding	-2217	Promoter non-target gene eQTMs
ENSG00000162188	cg26283550	GNG3	chr11	14.2757	1.82207	6.6e-08	1.56e-07	-148271	Positive	protein_coding	-2215	Promoter non-target gene eQTMs
ENSG00000092054	cg17776964	MYH7	chr14	0.602069	0.0505814	2.03e-12	7.26e-12	-923346	Positive	protein_coding	-2211	Promoter non-target gene eQTMs
ENSG00000260750	cg06423975	RP11-482M8.1	chr16	-0.849229	0.0407926	2.23e-33	7.72e-32	-458898	Negative	lincRNA	-2209	Promoter non-target gene eQTMs
ENSG00000167508	cg06423975	MVD	chr16	-18.471	1.08154	1.1e-25	1.55e-24	-700482	Negative	protein_coding	-2209	Promoter non-target gene eQTMs
ENSG00000260630	cg06423975	SNAI3-AS1	chr16	-2.08959	0.122893	4.54e-23	4.8e-22	711845	Negative	antisense	-2209	Promoter non-target gene eQTMs
ENSG00000196865	cg14032529	NHLRC2	chr10	-18.5608	2.08782	1.85e-10	5.51e-10	902203	Negative	protein_coding	-2208	Promoter non-target gene eQTMs
ENSG00000166734	cg00982984	CASC4	chr15	12.9585	1.85059	7.56e-07	1.61e-06	-912613	Negative	protein_coding	-2193	Promoter non-target gene eQTMs
ENSG00000042286	cg20605818	AIFM2	chr10	-3.6724	0.553557	2.64e-05	4.85e-05	308343	Negative	protein_coding	-2187	Promoter non-target gene eQTMs
ENSG00000132507	cg13169780	EIF5A	chr17	-80.7479	4.10037	9.23e-33	2.85e-31	-381253	Negative	protein_coding	-2181	Promoter non-target gene eQTMs
ENSG00000174326	cg13169780	SLC16A11	chr17	-2.30025	0.174049	7.66e-15	3.47e-14	646622	Negative	protein_coding	-2181	Promoter non-target gene eQTMs
ENSG00000196123	cg04845649	KIAA0895L	chr16	22.2406	4.48016	0.00396199	0.00576949	-10039	Positive	protein_coding	-2175	Promoter non-target gene eQTMs
ENSG00000138032	cg09615101	PPM1B	chr2	-31.6908	3.30314	2.39e-12	8.49e-12	-773399	Negative	protein_coding	-2169	Promoter non-target gene eQTMs
ENSG00000138078	cg09615101	PREPL	chr2	-85.4196	10.4508	5.52e-09	1.44e-08	625087	Negative	protein_coding	-2169	Promoter non-target gene eQTMs
ENSG00000168546	cg18137347	GFRA2	chr8	9.50564	0.600728	1.96e-26	3e-25	752589	Negative	protein_coding	-2168	Promoter non-target gene eQTMs
ENSG00000270059	cg14935258	RP11-88H12.2	chr3	0.310766	0.0563285	9.73e-05	0.00016881	-672194	Positive	sense_intronic	-2165	Promoter non-target gene eQTMs
ENSG00000237298	cg17740434	TTN-AS1	chr2	-3.03806	0.216246	1.81e-21	1.59e-20	-2154	Negative	antisense	-2154	Promoter-eQTMs
ENSG00000267784	cg17740434	RP11-171I2.1	chr2	-0.534005	0.0525953	5.32e-14	2.22e-13	200120	Negative	antisense	-2154	Promoter non-target gene eQTMs
ENSG00000102897	cg20992982	LYRM1	chr16	-1.62144	0.373348	0.0190915	0.0254077	-699504	Negative	protein_coding	-2154	Promoter non-target gene eQTMs
ENSG00000117479	cg17818559	SLC19A2	chr1	5.42212	0.640525	1e-09	2.8e-09	-356082	Negative	protein_coding	-2130	Promoter non-target gene eQTMs
ENSG00000109756	cg09654536	RAPGEF2	chr4	-9.60156	1.24357	2.13e-07	4.8e-07	-3293	Negative	protein_coding	-2128	Promoter-eQTMs
ENSG00000229183	cg01595554	PGA4	chr11	0.17267	0.0321732	0.0113212	0.0155615	-729729	Positive	protein_coding	-2124	Promoter non-target gene eQTMs
ENSG00000161091	cg09467605	MFSD12	chr19	-7.79798	0.542316	1.92e-21	1.68e-20	-752771	Negative	protein_coding	-2119	Promoter non-target gene eQTMs
ENSG00000065717	cg09467605	TLE2	chr19	-12.326	0.853017	2.09e-20	1.65e-19	-212149	Negative	protein_coding	-2119	Promoter non-target gene eQTMs
ENSG00000176490	cg09467605	DIRAS1	chr19	-13.2019	1.23468	2.24e-12	7.98e-12	70923	Negative	protein_coding	-2119	Promoter non-target gene eQTMs
ENSG00000112667	cg15123562	DNPH1	chr6	-1.77067	0.144296	2.52e-16	1.32e-15	851141	Negative	protein_coding	-2118	Promoter non-target gene eQTMs
ENSG00000178977	cg00242449	LINC00324	chr17	0.492771	0.0996997	0.0034398	0.00505007	-783089	Positive	lincRNA	-2110	Promoter non-target gene eQTMs
ENSG00000259826	cg08188073	RP11-467D6.1	chr7	0.887457	0.122738	2.65e-07	5.9e-07	4342	Positive	antisense	-2109	Promoter-eQTMs
ENSG00000166963	cg14529224	MAP1A	chr15	-181.374	18.8743	1.49e-10	4.47e-10	-315937	Negative	protein_coding	-2093	Promoter non-target gene eQTMs
ENSG00000169760	cg21459053	NLGN1	chr3	-8.7656	1.60888	0.00015558	0.00026361	-2087	Negative	protein_coding	-2087	Promoter-eQTMs
ENSG00000237187	cg22736807	NR2F1-AS1	chr5	-4.45343	0.93628	0.00271016	0.0040297	241664	Positive	antisense	-2086	Promoter non-target gene eQTMs
ENSG00000163918	cg14893267	RFC4	chr3	-3.1153	0.23865	1.17e-20	9.52e-20	955891	Negative	protein_coding	-2085	Promoter non-target gene eQTMs
ENSG00000178950	cg11119249	GAK	chr4	-28.3065	1.12951	3.16e-44	4.96e-42	836330	Negative	protein_coding	-2077	Promoter non-target gene eQTMs
ENSG00000127419	cg11119249	TMEM175	chr4	-15.4939	0.936643	2.01e-26	3.07e-25	-753219	Negative	protein_coding	-2077	Promoter non-target gene eQTMs
ENSG00000127415	cg11119249	IDUA	chr4	-3.59328	0.221908	2.48e-26	3.75e-25	-698609	Negative	protein_coding	-2077	Promoter non-target gene eQTMs
ENSG00000145214	cg11119249	DGKQ	chr4	-2.92472	0.210911	5.68e-19	3.88e-18	726719	Negative	protein_coding	-2077	Promoter non-target gene eQTMs
ENSG00000159733	cg11119249	ZFYVE28	chr4	-8.10652	0.626793	3.73e-16	1.92e-15	-583976	Negative	protein_coding	-2077	Promoter non-target gene eQTMs
ENSG00000090316	cg11119249	MAEA	chr4	-6.16381	0.537846	3.05e-15	1.44e-14	-395719	Negative	protein_coding	-2077	Promoter non-target gene eQTMs
ENSG00000131475	cg21854286	VPS25	chr17	3.48651	0.745375	0.00889565	0.0123913	224609	Positive	protein_coding	-2076	Promoter non-target gene eQTMs
ENSG00000205740	cg26100059	RP11-363N22.3	chr10	-0.534687	0.0710763	1.08e-07	2.5e-07	-834613	Negative	processed_transcript	-2068	Promoter non-target gene eQTMs
ENSG00000174886	cg18732869	NDUFA11	chr19	12.253	1.02373	1.22e-17	7.32e-17	848393	Negative	protein_coding	-2066	Promoter non-target gene eQTMs
ENSG00000104883	cg18732869	PEX11G	chr19	0.681689	0.0530354	1.77e-17	1.04e-16	-737206	Positive	protein_coding	-2066	Promoter non-target gene eQTMs
ENSG00000174788	cg18732869	PCP2	chr19	36.9595	2.89379	3e-14	1.28e-13	-891942	Negative	protein_coding	-2066	Promoter non-target gene eQTMs
ENSG00000091732	cg15068552	ZC3HC1	chr7	1.65091	0.326991	0.00119615	0.00185023	472076	Positive	protein_coding	-2058	Promoter non-target gene eQTMs
ENSG00000235194	cg06445317	PPP1R3E	chr14	-23.4488	2.332	1.21e-11	4.03e-11	-806411	Negative	protein_coding	-2049	Promoter non-target gene eQTMs
ENSG00000089505	cg01007768	CMTM1	chr16	0.606821	0.0477024	4.69e-19	3.23e-18	13889	Positive	protein_coding	-2047	Promoter non-target gene eQTMs
ENSG00000166797	cg01176271	FAM96A	chr15	3.77778	0.262043	9.39e-23	9.54e-22	23495	Negative	protein_coding	-2042	Promoter-eQTMs
ENSG00000169118	cg01176271	CSNK1G1	chr15	9.43563	0.805513	9.19e-17	5.03e-16	-69465	Positive	protein_coding	-2042	Promoter non-target gene eQTMs
ENSG00000185088	cg01176271	RPS27L	chr15	5.46426	0.454744	1.91e-16	1.01e-15	970188	Negative	protein_coding	-2042	Promoter non-target gene eQTMs
ENSG00000103642	cg01176271	LACTB	chr15	1.25786	0.119441	2.53e-13	9.92e-13	-974227	Negative	protein_coding	-2042	Promoter non-target gene eQTMs
ENSG00000139946	cg11121623	PELI2	chr14	-5.05227	0.88167	8.37e-05	0.00014621	-2040	Negative	protein_coding	-2040	Promoter-eQTMs
ENSG00000126777	cg11121623	KTN1	chr14	-47.3942	6.03029	5.21e-08	1.24e-07	-560782	Negative	protein_coding	-2040	Promoter non-target gene eQTMs
ENSG00000174442	cg27188447	ZWILCH	chr15	-1.62249	0.227981	1.5e-06	3.11e-06	-560833	Negative	protein_coding	-2029	Promoter non-target gene eQTMs
ENSG00000164118	cg08328610	CEP44	chr4	-12.9607	0.893246	1.61e-23	1.78e-22	754438	Negative	protein_coding	-2022	Promoter non-target gene eQTMs
ENSG00000109586	cg08328610	GALNT7	chr4	-17.5509	1.3943	7.81e-20	5.85e-19	-360481	Negative	protein_coding	-2022	Promoter non-target gene eQTMs
ENSG00000129990	cg15786971	SYT5	chr19	-2.75028	0.172361	1.13e-24	1.42e-23	112895	Negative	protein_coding	-2019	Promoter non-target gene eQTMs
ENSG00000182601	cg01421548	HS3ST4	chr16	1.19081	0.281678	0.0142722	0.0193396	-2075	Positive	protein_coding	-2008	Promoter-eQTMs
ENSG00000065600	cg07862094	TMEM206	chr1	-1.70494	0.177173	6.7e-12	2.28e-11	203411	Negative	protein_coding	-2008	Promoter non-target gene eQTMs
ENSG00000100632	cg23609571	ERH	chr14	-16.8033	2.49871	2.12e-06	4.33e-06	809000	Positive	protein_coding	-2005	Promoter non-target gene eQTMs
ENSG00000133983	cg23609571	COX16	chr14	-4.69365	0.823312	0.00019699	0.0003305	-135953	Negative	protein_coding	-2005	Promoter non-target gene eQTMs
ENSG00000065361	cg11520665	ERBB3	chr12	4.08253	0.643725	6.61e-05	0.00011668	247251	Positive	protein_coding	-2002	Promoter non-target gene eQTMs
ENSG00000153832	cg05658730	FBXO36	chr2	-1.69348	0.247602	1.35e-06	2.81e-06	-792540	Negative	protein_coding	-1997	Promoter non-target gene eQTMs
ENSG00000113621	cg12938158	TXNDC15	chr5	26.4106	3.22423	6.19e-09	1.61e-08	348711	Negative	protein_coding	-1996	Promoter non-target gene eQTMs
ENSG00000171773	cg03630771	NXNL1	chr19	-10.8848	2.51029	0.0264781	0.0346786	-207489	Negative	protein_coding	-1996	Promoter non-target gene eQTMs
ENSG00000188163	cg14295062	FAM166A	chr9	-0.414505	0.0719701	0.00063908	0.00101839	-188928	Negative	protein_coding	-1994	Promoter non-target gene eQTMs
ENSG00000131351	cg05194248	HAUS8	chr19	0.58422	0.1288	0.0123166	0.016835	-606789	Positive	protein_coding	-1994	Promoter non-target gene eQTMs
ENSG00000204965	cg09170127	PCDHA5	chr5	0.790468	0.0954618	1.21e-05	2.3e-05	120944	Positive	protein_coding	-1980	Promoter non-target gene eQTMs
ENSG00000183281	cg08229694	PLGLB1	chr2	8.73757	0.996798	9.1e-11	2.78e-10	-807485	Positive	protein_coding	-1966	Promoter non-target gene eQTMs
ENSG00000132313	cg08229694	MRPL35	chr2	11.7838	1.46501	1.43e-08	3.59e-08	4281	Positive	protein_coding	-1966	Promoter non-target gene eQTMs
ENSG00000168890	cg08229694	TMEM150A	chr2	-1.49011	0.19539	1.97e-08	4.89e-08	596527	Negative	protein_coding	-1966	Promoter non-target gene eQTMs
ENSG00000204745	cg18983330	AC083899.3	chr2	1.77857	0.145757	4.89e-18	3.04e-17	930126	Negative	unprocessed_pseudogene	-1964	Promoter non-target gene eQTMs
ENSG00000168883	cg18983330	USP39	chr2	3.21019	0.634734	0.00183856	0.00278799	-592216	Positive	protein_coding	-1964	Promoter non-target gene eQTMs
ENSG00000132423	cg24474130	COQ3	chr6	-2.50404	0.146824	1.62e-29	3.44e-28	-534929	Positive	protein_coding	-1964	Promoter non-target gene eQTMs
ENSG00000132424	cg24474130	PNISR	chr6	-112.907	7.0093	3.17e-27	5.31e-26	-563578	Negative	protein_coding	-1964	Promoter non-target gene eQTMs
ENSG00000123552	cg24474130	USP45	chr6	-4.72452	0.396496	2.49e-16	1.31e-15	-597907	Negative	protein_coding	-1964	Promoter non-target gene eQTMs
ENSG00000112234	cg24474130	FBXL4	chr6	-3.00045	0.364079	1.56e-09	4.29e-09	-34063	Positive	protein_coding	-1964	Promoter non-target gene eQTMs
ENSG00000112237	cg24474130	CCNC	chr6	-5.26194	0.740271	2.23e-07	5.01e-07	-707915	Positive	protein_coding	-1964	Promoter non-target gene eQTMs
ENSG00000146267	cg24474130	FAXC	chr6	-2.67209	0.527291	0.0007147	0.00113334	-436696	Positive	protein_coding	-1964	Promoter non-target gene eQTMs
ENSG00000069020	cg09983701	MAST4	chr5	3.72449	0.384631	5.95e-13	2.25e-12	-784980	Positive	protein_coding	-1963	Promoter non-target gene eQTMs
ENSG00000138821	cg27333178	SLC39A8	chr4	-2.85731	0.689385	0.0161118	0.0216785	252220	Negative	protein_coding	-1942	Promoter non-target gene eQTMs
ENSG00000028528	cg01176271	SNX1	chr15	12.3649	0.959977	2.91e-19	2.05e-18	-1937	Positive	protein_coding	-1937	Promoter-eQTMs
ENSG00000196449	cg02460018	YRDC	chr1	2.0923	0.217289	1.12e-11	3.75e-11	-7216	Positive	protein_coding	-1927	Promoter non-target gene eQTMs
ENSG00000132321	cg21664983	IQCA1	chr2	-1.68669	0.316156	0.00047657	0.00077026	-828158	Negative	protein_coding	-1900	Promoter non-target gene eQTMs
ENSG00000181904	cg04842522	C5orf24	chr5	-47.7083	8.36499	0.00024093	0.00040109	320684	Positive	protein_coding	-1900	Promoter non-target gene eQTMs
ENSG00000113583	cg04842522	C5orf15	chr5	-30.0987	6.6712	0.00808221	0.0113273	569486	Negative	protein_coding	-1900	Promoter non-target gene eQTMs
ENSG00000151414	cg03946186	NEK7	chr1	-17.6879	1.80192	1.34e-11	4.44e-11	-1868	Negative	protein_coding	-1899	Promoter-eQTMs
ENSG00000183340	cg14107975	JRKL	chr11	-8.05867	0.735253	2.34e-15	1.12e-14	46655	Positive	protein_coding	-1896	Promoter non-target gene eQTMs
ENSG00000134419	cg01540024	RPS15A	chr16	53.9704	3.03871	8.73e-31	2.16e-29	937048	Negative	protein_coding	-1887	Promoter non-target gene eQTMs
ENSG00000103540	cg01540024	CCP110	chr16	21.2935	1.52224	2.72e-22	2.64e-21	-194532	Positive	protein_coding	-1887	Promoter non-target gene eQTMs
ENSG00000103657	cg01222408	HERC1	chr15	66.3354	4.91639	1.24e-19	9.1e-19	-330718	Positive	protein_coding	-1882	Promoter non-target gene eQTMs
ENSG00000006625	cg23461814	GGCT	chr7	1.40547	0.227802	2.01e-05	3.73e-05	-506140	Positive	protein_coding	-1881	Promoter non-target gene eQTMs
ENSG00000161547	cg26979143	SRSF2	chr17	130.252	8.45649	4.03e-22	3.82e-21	354481	Positive	protein_coding	-1880	Promoter non-target gene eQTMs
ENSG00000217929	cg06223767	CICP18	chr6	1.06082	0.115119	1.02e-11	3.43e-11	261706	Positive	processed_pseudogene	-1877	Promoter non-target gene eQTMs
ENSG00000170004	cg15086788	CHD3	chr17	-110.426	9.98951	2.64e-14	1.13e-13	-364687	Negative	protein_coding	-1875	Promoter non-target gene eQTMs
ENSG00000108256	cg01406758	NUFIP2	chr17	-40.8139	3.69238	2.61e-13	1.02e-12	-303457	Negative	protein_coding	-1869	Promoter non-target gene eQTMs
ENSG00000087095	cg01406758	NLK	chr17	-35.8881	3.45303	5.55e-13	2.1e-12	-910645	Negative	protein_coding	-1869	Promoter non-target gene eQTMs
ENSG00000175395	cg27337342	ZNF25	chr10	-25.6536	5.12075	0.00124226	0.00191684	-91408	Positive	protein_coding	-1855	Promoter non-target gene eQTMs
ENSG00000130475	cg02576503	FCHO1	chr19	-4.98009	0.337633	3.71e-22	3.53e-21	277097	Negative	protein_coding	-1852	Promoter non-target gene eQTMs
ENSG00000269044	cg02576503	CTC-429P9.3	chr19	-4.09336	0.47664	1.14e-09	3.17e-09	836824	Negative	sense_intronic	-1852	Promoter non-target gene eQTMs
ENSG00000173611	cg04739729	SCAI	chr9	-30.2177	6.71822	0.0101936	0.0140954	805782	Negative	protein_coding	-1838	Promoter non-target gene eQTMs
ENSG00000157107	cg06018401	FCHO2	chr5	-8.27067	0.933353	3.32e-10	9.67e-10	846971	Negative	protein_coding	-1836	Promoter non-target gene eQTMs
ENSG00000143363	cg07367563	PRUNE1	chr1	-1.96423	0.250515	5.07e-08	1.21e-07	-51172	Negative	protein_coding	-1834	Promoter non-target gene eQTMs
ENSG00000080603	cg25795037	SRCAP	chr16	-89.7578	8.67441	1.7e-13	6.75e-13	-419377	Negative	protein_coding	-1832	Promoter non-target gene eQTMs
ENSG00000079387	cg15416064	SENP1	chr12	-5.1655	0.553832	1.07e-11	3.59e-11	772722	Positive	protein_coding	-1825	Promoter non-target gene eQTMs
ENSG00000269514	cg15416064	RP11-370I10.12	chr12	-1.58073	0.187995	4.74e-10	1.36e-09	-617262	Negative	lincRNA	-1825	Promoter non-target gene eQTMs
ENSG00000061273	cg15416064	HDAC7	chr12	7.58778	0.937783	1.06e-08	2.69e-08	1032897	Positive	protein_coding	-1825	Promoter non-target gene eQTMs
ENSG00000166925	cg12020476	TSC22D4	chr7	20.5555	1.4937	1.38e-17	8.24e-17	122441	Positive	protein_coding	-1818	Promoter non-target gene eQTMs
ENSG00000087077	cg12020476	TRIP6	chr7	5.60187	0.502791	7.24e-11	2.24e-10	281587	Positive	protein_coding	-1818	Promoter non-target gene eQTMs
ENSG00000164151	cg06843687	ICE1	chr5	-12.6447	0.976899	1.48e-19	1.08e-18	278799	Positive	protein_coding	-1811	Promoter non-target gene eQTMs
ENSG00000282936	cg03158666	CTC-281F24.5	chr17	-1.77404	0.079644	7e-37	3.89e-35	667806	Positive	protein_coding	-1810	Promoter non-target gene eQTMs
ENSG00000175826	cg03158666	CTDNEP1	chr17	-9.82624	0.60766	5.9e-27	9.6e-26	52834	Positive	protein_coding	-1810	Promoter non-target gene eQTMs
ENSG00000215041	cg03158666	NEURL4	chr17	-14.0587	0.850488	7.32e-27	1.18e-25	-19203	Negative	protein_coding	-1810	Promoter non-target gene eQTMs
ENSG00000129244	cg03158666	ATP1B2	chr17	-231.82	16.6473	7.29e-20	5.48e-19	350202	Negative	protein_coding	-1810	Promoter non-target gene eQTMs
ENSG00000108590	cg03158666	MED31	chr17	1.09433	0.0814229	2.66e-19	1.88e-18	653114	Positive	protein_coding	-1810	Promoter non-target gene eQTMs
ENSG00000236778	cg03411979	INTS6-AS1	chr13	-2.47339	0.272449	3.03e-11	9.69e-11	-1801	Positive	antisense	-1798	Promoter-eQTMs
ENSG00000261556	cg01814186	SMG1P7	chr16	-1.53925	0.147777	4.44e-13	1.69e-12	-652689	Negative	transcribed_unprocessed_pseudogene	-1791	Promoter non-target gene eQTMs
ENSG00000105245	cg21070656	NUMBL	chr19	-7.86062	0.501254	2.9e-24	3.5e-23	598382	Positive	protein_coding	-1791	Promoter non-target gene eQTMs
ENSG00000028277	cg21070656	POU2F2	chr19	-2.45506	0.183425	4.64e-19	3.2e-18	-821823	Negative	protein_coding	-1791	Promoter non-target gene eQTMs
ENSG00000076928	cg21070656	ARHGEF1	chr19	-14.2077	1.36557	7.56e-14	3.1e-13	618874	Negative	protein_coding	-1791	Promoter non-target gene eQTMs
ENSG00000090013	cg21070656	BLVRB	chr19	-2.75055	0.259413	4.14e-13	1.58e-12	816522	Negative	protein_coding	-1791	Promoter non-target gene eQTMs
ENSG00000013392	cg00081666	RWDD2A	chr6	-2.85835	0.256633	9.46e-16	4.7e-15	125731	Negative	protein_coding	-1785	Promoter non-target gene eQTMs
ENSG00000134905	cg15720019	CARS2	chr13	-6.86951	0.628724	6.52e-14	2.7e-13	73963	Negative	protein_coding	-1772	Promoter-eQTMs
ENSG00000229152	cg15720019	ANKRD10-IT1	chr13	4.49651	0.617531	4.5e-07	9.83e-07	-179264	Negative	sense_intronic	-1772	Promoter non-target gene eQTMs
ENSG00000213753	cg17335237	CENPBD1P1	chr19	14.2033	0.804214	3.39e-30	7.82e-29	-1768	Positive	transcribed_processed_pseudogene	-1768	Promoter-eQTMs
ENSG00000223873	cg14975429	SAP18P2	chr2	-0.68071	0.117448	0.00017822	0.00030048	9565	Negative	processed_pseudogene	-1764	Promoter non-target gene eQTMs
ENSG00000126500	cg02149740	FLRT1	chr11	9.01241	0.499616	2.41e-29	5.02e-28	-83847	Positive	protein_coding	-1763	Promoter non-target gene eQTMs
ENSG00000038358	cg19482982	EDC4	chr16	-16.9518	1.29091	1.01e-18	6.73e-18	992702	Negative	protein_coding	-1761	Promoter non-target gene eQTMs
ENSG00000102890	cg19482982	ELMO3	chr16	-0.500068	0.0653562	6.28e-08	1.49e-07	318761	Negative	protein_coding	-1761	Promoter non-target gene eQTMs
ENSG00000102871	cg19482982	TRADD	chr16	-0.597457	0.0844188	1.5e-06	3.11e-06	-273835	Negative	protein_coding	-1761	Promoter non-target gene eQTMs
ENSG00000133641	cg16049349	C12orf29	chr12	4.25958	0.852864	0.00053267	0.0008569	-1755	Positive	protein_coding	-1755	Promoter-eQTMs
ENSG00000139324	cg16049349	TMTC3	chr12	7.70631	1.98739	0.022064	0.029156	106695	Negative	protein_coding	-1755	Promoter non-target gene eQTMs
ENSG00000138434	cg13998023	SSFA2	chr2	-65.2681	3.98568	1.9e-27	3.27e-26	909887	Negative	protein_coding	-1753	Promoter non-target gene eQTMs
ENSG00000174373	cg07410086	RALGAPA1	chr14	132.443	11.7685	8.34e-15	3.77e-14	-491700	Negative	protein_coding	-1745	Promoter non-target gene eQTMs
ENSG00000100883	cg07410086	SRP54	chr14	31.0278	3.31171	6.02e-12	2.06e-11	-64695	Positive	protein_coding	-1745	Promoter non-target gene eQTMs
ENSG00000106069	cg00311035	CHN2	chr7	-32.4351	4.82115	1.31e-06	2.73e-06	-989983	Negative	protein_coding	-1742	Promoter non-target gene eQTMs
ENSG00000283341	cg01514668	RP11-472I20.4	chr11	-1.89177	0.130454	5.15e-24	6.08e-23	-1740	Negative	processed_transcript	-1740	Promoter-eQTMs
ENSG00000052841	cg01514668	TTC17	chr11	-18.1781	0.854899	8.02e-38	5.14e-36	-221709	Negative	protein_coding	-1740	Promoter non-target gene eQTMs
ENSG00000101493	cg14626483	ZNF516	chr18	14.5403	3.53097	0.031992	0.0413913	466353	Positive	protein_coding	-1740	Promoter non-target gene eQTMs
ENSG00000087116	cg13312174	ADAMTS2	chr5	-0.892652	0.0967888	4.91e-10	1.41e-09	-249167	Negative	protein_coding	-1733	Promoter non-target gene eQTMs
ENSG00000259706	cg15460872	HSP90B2P	chr15	-0.736	0.127112	7.7e-05	0.00013508	606932	Negative	processed_pseudogene	-1729	Promoter non-target gene eQTMs
ENSG00000168675	cg01597553	LDLRAD4	chr18	-28.3332	3.66383	5.89e-08	1.4e-07	-1728	Negative	protein_coding	-1728	Promoter-eQTMs
ENSG00000136842	cg16079347	TMOD1	chr9	6.16269	0.925636	6.83e-06	1.33e-05	-1719	Negative	protein_coding	-1719	Promoter-eQTMs
ENSG00000255036	cg16079347	RP11-23J9.4	chr9	-8.62017	0.846458	1.4e-13	5.6e-13	-264402	Negative	processed_transcript	-1719	Promoter non-target gene eQTMs
ENSG00000136938	cg16079347	ANP32B	chr9	14.2266	1.52096	1.88e-12	6.75e-12	480442	Negative	protein_coding	-1719	Promoter non-target gene eQTMs
ENSG00000095380	cg16079347	NANS	chr9	1.97734	0.347566	0.00023147	0.00038622	553833	Negative	protein_coding	-1719	Promoter non-target gene eQTMs
ENSG00000136859	cg18013517	ANGPTL2	chr9	1.91536	0.193804	3.52e-11	1.12e-10	-224969	Positive	protein_coding	-1714	Promoter non-target gene eQTMs
ENSG00000183011	cg02542770	NAA38	chr17	-4.39783	0.665841	1.58e-05	2.97e-05	30262	Negative	protein_coding	-1709	Promoter-eQTMs
ENSG00000157617	cg04469303	C2CD2	chr21	8.7737	1.68136	0.00116705	0.00180729	-5790	Positive	protein_coding	-1709	Promoter non-target gene eQTMs
ENSG00000109107	cg16652394	ALDOC	chr17	-489.383	112.002	0.0222781	0.0294257	147022	Negative	protein_coding	-1708	Promoter non-target gene eQTMs
ENSG00000137822	cg16445139	TUBGCP4	chr15	-9.54808	2.06203	0.00719058	0.0101489	-1706	Negative	protein_coding	-1706	Promoter-eQTMs
ENSG00000171551	cg01230160	ECEL1	chr2	31.5048	2.43857	7.93e-18	4.85e-17	875295	Positive	protein_coding	-1706	Promoter non-target gene eQTMs
ENSG00000086102	cg04654830	NFX1	chr9	-5.98787	0.680998	1.56e-09	4.29e-09	737662	Negative	protein_coding	-1706	Promoter non-target gene eQTMs
ENSG00000260669	cg01420348	AL136419.6	chr14	-1.83314	0.158327	2.19e-15	1.05e-14	-113889	Negative	processed_transcript	-1704	Promoter non-target gene eQTMs
ENSG00000142634	cg14793291	EFHD2	chr1	-7.95239	0.503194	1.33e-23	1.49e-22	-439676	Negative	protein_coding	-1700	Promoter non-target gene eQTMs
ENSG00000262655	cg00326127	SPON1	chr11	190.13	20.0522	7.28e-11	2.25e-10	951866	Negative	protein_coding	-1698	Promoter non-target gene eQTMs
ENSG00000197702	cg00326127	PARVA	chr11	10.0221	2.14328	0.00531649	0.00762941	-633294	Negative	protein_coding	-1698	Promoter non-target gene eQTMs
ENSG00000124831	cg08992911	LRRFIP1	chr2	-5.67342	1.18994	0.00500377	0.00720534	140462	Negative	protein_coding	-1697	Promoter non-target gene eQTMs
ENSG00000023572	cg13543544	GLRX2	chr1	2.81821	0.145772	1.21e-33	4.34e-32	-29771	Positive	protein_coding	-1673	Promoter non-target gene eQTMs
ENSG00000134138	cg16523643	MEIS2	chr15	14.3051	1.43508	1.08e-13	4.36e-13	213766	Positive	protein_coding	-1671	Promoter-eQTMs
ENSG00000178826	cg05385805	TMEM139	chr7	0.555822	0.128634	0.0223746	0.0295465	-129527	Positive	protein_coding	-1671	Promoter non-target gene eQTMs
ENSG00000127928	cg08073166	GNGT1	chr7	-166.683	19.8006	1.17e-09	3.25e-09	-1317297	Negative	protein_coding	-1668	Promoter non-target gene eQTMs
ENSG00000277443	cg00161229	MARCKS	chr6	34.4049	3.41175	3.76e-14	1.59e-13	-114022	Positive	protein_coding	-1666	Promoter non-target gene eQTMs
ENSG00000141971	cg13179983	MVB12A	chr19	-2.43772	0.17676	9.25e-20	6.87e-19	-747630	Negative	protein_coding	-1661	Promoter non-target gene eQTMs
ENSG00000130304	cg13179983	SLC27A1	chr19	-11.0503	0.863229	5.71e-18	3.53e-17	-684583	Positive	protein_coding	-1661	Promoter non-target gene eQTMs
ENSG00000120832	cg01290885	MTERF2	chr12	-10.6203	0.572457	9.25e-33	2.85e-31	-20122	Positive	protein_coding	-1658	Promoter non-target gene eQTMs
ENSG00000145191	cg16625000	EIF2B5	chr3	-11.7182	0.683353	3.6e-28	6.6e-27	-228266	Negative	protein_coding	-1653	Promoter non-target gene eQTMs
ENSG00000105829	cg09956907	BET1	chr7	-2.83784	0.308239	1.57e-11	5.16e-11	946091	Negative	protein_coding	-1651	Promoter non-target gene eQTMs
ENSG00000127995	cg09956907	CASD1	chr7	-12.6499	1.55169	4.35e-09	1.15e-08	-399634	Negative	protein_coding	-1651	Promoter non-target gene eQTMs
ENSG00000156486	cg22648885	KCNS2	chr8	-0.583768	0.137349	0.0213411	0.0282516	-518222	Negative	protein_coding	-1649	Promoter non-target gene eQTMs
ENSG00000122971	cg03198410	ACADS	chr12	1.34321	0.0929374	5.46e-20	4.15e-19	734257	Positive	protein_coding	-1648	Promoter non-target gene eQTMs
ENSG00000223923	cg04995243	AC010136.2	chr2	0.62967	0.0431467	2.47e-18	1.59e-17	-422157	Positive	antisense	-1645	Promoter non-target gene eQTMs
ENSG00000039560	cg11585500	RAI14	chr5	-7.49635	1.3369	0.00126969	0.00195795	-1553	Negative	protein_coding	-1644	Promoter-eQTMs
ENSG00000169682	cg19758380	SPNS1	chr16	7.88688	0.469015	2.05e-30	4.86e-29	94174	Positive	protein_coding	-1642	Promoter non-target gene eQTMs
ENSG00000205609	cg19758380	EIF3CL	chr16	16.537	1.83197	4.71e-10	1.35e-09	500468	Negative	protein_coding	-1642	Promoter non-target gene eQTMs
ENSG00000261474	cg05299836	RP11-452L6.1	chr16	-0.707597	0.0851728	7.61e-08	1.79e-07	-341789	Negative	lincRNA	-1639	Promoter non-target gene eQTMs
ENSG00000156671	cg22454401	SAMD8	chr10	-17.0415	3.09799	0.00014562	0.00024736	-303296	Positive	protein_coding	-1636	Promoter non-target gene eQTMs
ENSG00000107130	cg03612602	NCS1	chr9	-25.119	2.18105	2.74e-14	1.18e-13	994000	Negative	protein_coding	-1633	Promoter non-target gene eQTMs
ENSG00000092964	cg15135930	DPYSL2	chr8	92.2438	6.91656	8.69e-21	7.15e-20	220916	Positive	protein_coding	-1624	Promoter non-target gene eQTMs
ENSG00000253958	cg05062393	CLDN23	chr8	0.33535	0.0290021	1.19e-16	6.44e-16	-301830	Positive	protein_coding	-1621	Promoter non-target gene eQTMs
ENSG00000174628	cg27265032	IQCK	chr16	-10.3919	1.0181	9.22e-14	3.75e-13	192693	Negative	protein_coding	-1618	Promoter non-target gene eQTMs
ENSG00000186230	cg09577391	ZNF749	chr19	-2.41831	0.55257	0.0157382	0.0212083	-568353	Negative	protein_coding	-1617	Promoter non-target gene eQTMs
ENSG00000114346	cg11733675	ECT2	chr3	-9.10357	1.23921	5.79e-08	1.37e-07	-647217	Negative	protein_coding	-1615	Promoter non-target gene eQTMs
ENSG00000149571	cg00554702	KIRREL3	chr11	3.74176	0.307186	3.62e-18	2.29e-17	-796608	Positive	protein_coding	-1614	Promoter non-target gene eQTMs
ENSG00000085491	cg25527125	SLC25A24	chr1	8.19561	1.25323	1.74e-06	3.59e-06	742920	Negative	protein_coding	-1613	Promoter non-target gene eQTMs
ENSG00000068971	cg14395634	PPP2R5B	chr11	25.7889	2.44675	2.22e-13	8.74e-13	-941184	Positive	protein_coding	-1611	Promoter non-target gene eQTMs
ENSG00000253159	cg07889058	PCDHGA12	chr5	3.00138	0.263859	2.69e-10	7.89e-10	730222	Positive	protein_coding	-1605	Promoter non-target gene eQTMs
ENSG00000151929	cg15509010	BAG3	chr10	-9.36724	1.86982	0.00258628	0.00385496	-1604	Negative	protein_coding	-1604	Promoter-eQTMs
ENSG00000282413	cg15509010	RP11-359E7.3	chr10	0.332277	0.0504811	4.16e-06	8.25e-06	165892	Positive	processed_pseudogene	-1604	Promoter non-target gene eQTMs
ENSG00000139636	cg14483935	LMBR1L	chr12	-6.96784	0.781329	4.7e-11	1.48e-10	36444	Negative	protein_coding	-1598	Promoter non-target gene eQTMs
ENSG00000114812	cg07448333	VIPR1	chr3	3.85945	0.76571	0.00233796	0.00350288	-418025	Positive	protein_coding	-1593	Promoter non-target gene eQTMs
ENSG00000281593	cg15424250	GS1-114I9.3	chr7	-0.506868	0.109609	0.00636502	0.00904765	372208	Negative	protein_coding	-1592	Promoter non-target gene eQTMs
ENSG00000167612	cg05651442	ANKRD33	chr12	-28.265	3.94519	2.49e-07	5.56e-07	-65237	Negative	protein_coding	-1579	Promoter non-target gene eQTMs
ENSG00000100023	cg05725452	PPIL2	chr22	-20.2083	2.06222	4.14e-13	1.58e-12	23589	Positive	protein_coding	-1576	Promoter non-target gene eQTMs
ENSG00000099949	cg05725452	LZTR1	chr22	-30.6364	3.19075	5.05e-12	1.74e-11	-660151	Negative	protein_coding	-1576	Promoter non-target gene eQTMs
ENSG00000224086	cg05725452	LL22NC03-86G7.1	chr22	-3.92492	0.453841	3.57e-10	1.04e-09	295849	Positive	antisense	-1576	Promoter non-target gene eQTMs
ENSG00000134330	cg05515713	IAH1	chr2	5.30005	0.275695	1.48e-31	3.98e-30	-648649	Negative	protein_coding	-1573	Promoter non-target gene eQTMs
ENSG00000115756	cg05515713	HPCAL1	chr2	-27.5021	1.55144	3.32e-29	6.82e-28	180582	Positive	protein_coding	-1573	Promoter non-target gene eQTMs
ENSG00000134317	cg05515713	GRHL1	chr2	6.06918	0.37122	5.02e-28	9.1e-27	-170614	Positive	protein_coding	-1573	Promoter non-target gene eQTMs
ENSG00000270866	cg10074775	RP11-706J10.2	chr8	-1.01726	0.200595	0.00068845	0.00109281	-278794	Negative	lincRNA	-1573	Promoter non-target gene eQTMs
ENSG00000261351	cg11441148	CTD-3185P2.1	chr15	1.9983	0.310013	1.01e-05	1.94e-05	-956668	Positive	antisense	-1572	Promoter non-target gene eQTMs
ENSG00000118705	cg06198069	RPN2	chr20	38.8425	7.54494	0.00077409	0.00122333	-344372	Positive	protein_coding	-1567	Promoter non-target gene eQTMs
ENSG00000106080	cg24152262	FKBP14	chr7	-4.2967	0.393417	1.78e-14	7.79e-14	17660	Negative	protein_coding	-1563	Promoter-eQTMs
ENSG00000167968	cg05518842	DNASE1L2	chr16	2.47857	0.311815	3.6e-05	6.53e-05	462526	Positive	protein_coding	-1560	Promoter non-target gene eQTMs
ENSG00000272888	cg09523278	LINC01578	chr15	-16.4918	1.55745	5.91e-15	2.71e-14	-64725	Negative	processed_transcript	-1558	Promoter-eQTMs
ENSG00000261840	cg05826330	RP11-146F11.1	chr16	-1.30708	0.126373	5.81e-11	1.81e-10	761925	Negative	antisense	-1552	Promoter non-target gene eQTMs
ENSG00000136819	cg18327994	C9orf78	chr9	5.43573	0.580372	2.74e-11	8.81e-11	-216864	Positive	protein_coding	-1542	Promoter non-target gene eQTMs
ENSG00000165973	cg20686479	NELL1	chr11	-0.391439	0.084802	0.0045163	0.00654038	955396	Negative	protein_coding	-1536	Promoter non-target gene eQTMs
ENSG00000261587	cg11290225	TMEM249	chr8	1.12034	0.148642	7.04e-07	1.51e-06	114989	Positive	protein_coding	-1531	Promoter non-target gene eQTMs
ENSG00000182175	cg09884223	RGMA	chr15	2.38808	0.221325	1.13e-13	4.55e-13	-151042	Negative	protein_coding	-1524	Promoter non-target gene eQTMs
ENSG00000102921	cg04399289	N4BP1	chr16	4.91691	0.946863	0.00061174	0.00097731	744625	Positive	protein_coding	-1520	Promoter non-target gene eQTMs
ENSG00000140057	cg04362655	AK7	chr14	-3.76126	0.648325	0.00011856	0.00020348	857110	Negative	protein_coding	-1515	Promoter non-target gene eQTMs
ENSG00000279948	cg24696028	CTD-2233K9.1	chr19	-0.0959913	0.0191714	0.0066511	0.00942075	-281922	Negative	TEC	-1515	Promoter non-target gene eQTMs
ENSG00000143178	cg18018245	TBX19	chr1	-0.741009	0.120363	6.06e-05	0.0001073	343580	Negative	protein_coding	-1514	Promoter non-target gene eQTMs
ENSG00000223935	cg14150252	AC008074.3	chr2	0.816353	0.0561768	1.52e-21	1.35e-20	-552771	Positive	antisense	-1509	Promoter non-target gene eQTMs
ENSG00000159335	cg24679411	PTMS	chr12	80.113	7.19322	2.28e-15	1.09e-14	-1506	Positive	protein_coding	-1506	Promoter-eQTMs
ENSG00000250510	cg24679411	GPR162	chr12	17.5252	1.77271	3.02e-11	9.66e-11	54602	Positive	protein_coding	-1506	Promoter non-target gene eQTMs
ENSG00000120837	cg06181974	NFYB	chr12	7.91277	0.749071	7.61e-14	3.12e-13	339714	Positive	protein_coding	-1505	Promoter non-target gene eQTMs
ENSG00000255150	cg06181974	EID3	chr12	1.91879	0.189748	1.44e-12	5.24e-12	-153061	Positive	protein_coding	-1505	Promoter non-target gene eQTMs
ENSG00000137809	cg09777506	ITGA11	chr15	1.90466	0.28673	7.42e-06	1.44e-05	523193	Positive	protein_coding	-1504	Promoter non-target gene eQTMs
ENSG00000139372	cg25130672	TDG	chr12	8.89244	0.66155	7.07e-20	5.31e-19	-490976	Negative	protein_coding	-1503	Promoter non-target gene eQTMs
ENSG00000111727	cg25130672	HCFC2	chr12	8.3354	1.01222	1.25e-09	3.47e-09	-392267	Positive	protein_coding	-1503	Promoter non-target gene eQTMs
ENSG00000259707	cg04884111	RP11-752G15.4	chr15	-0.949922	0.0811908	1.25e-15	6.14e-15	-644080	Negative	processed_pseudogene	-1502	Promoter non-target gene eQTMs
ENSG00000177082	cg17823892	WDR73	chr15	14.0845	1.58174	2.13e-11	6.93e-11	342659	Positive	protein_coding	-1500	Promoter non-target gene eQTMs
ENSG00000186831	cg11760857	KRT17P2	chr17	1.37771	0.253516	0.003182	0.00468765	166446	Positive	transcribed_unprocessed_pseudogene	-1499	Promoter non-target gene eQTMs
ENSG00000168306	cg02981092	ACOX2	chr3	-2.34237	0.499879	0.00761612	0.0107066	-947364	Negative	protein_coding	-1496	Promoter non-target gene eQTMs
ENSG00000084092	cg24837796	NOA1	chr4	1.43086	0.294918	0.00329269	0.00484503	-494939	Positive	protein_coding	-1496	Promoter non-target gene eQTMs
ENSG00000258683	cg20900537	RP11-11K13.1	chr14	5.64607	0.515387	1.36e-17	8.12e-17	9235	Positive	lincRNA	-1492	Promoter-eQTMs
ENSG00000114626	cg08668199	ABTB1	chr3	-10.1003	2.45648	0.0357234	0.0459316	-403793	Negative	protein_coding	-1479	Promoter non-target gene eQTMs
ENSG00000086666	cg01843524	ZFAND6	chr15	26.2601	1.98585	1.33e-20	1.08e-19	135634	Positive	protein_coding	-1479	Promoter non-target gene eQTMs
ENSG00000129474	cg21681740	AJUBA	chr14	1.40729	0.306838	0.0128208	0.0174794	-463055	Positive	protein_coding	-1478	Promoter non-target gene eQTMs
ENSG00000130244	cg14730085	FAM98C	chr19	-1.90629	0.273401	1.12e-06	2.35e-06	-628773	Negative	protein_coding	-1472	Promoter non-target gene eQTMs
ENSG00000134285	cg20884776	FKBP11	chr12	-2.37375	0.401907	7.09e-05	0.00012484	-106257	Negative	protein_coding	-1467	Promoter non-target gene eQTMs
ENSG00000144535	cg11540624	DIS3L2	chr2	3.59559	0.658646	0.0003608	0.00059047	252889	Positive	protein_coding	-1461	Promoter non-target gene eQTMs
ENSG00000144524	cg11540624	COPS7B	chr2	3.3368	0.667639	0.00183293	0.00278064	73315	Positive	protein_coding	-1461	Promoter non-target gene eQTMs
ENSG00000259562	cg04550693	RP11-762H8.2	chr15	-0.298078	0.0307763	1.22e-11	4.06e-11	148360	Negative	transcribed_processed_pseudogene	-1456	Promoter non-target gene eQTMs
ENSG00000105255	cg18581445	FSD1	chr19	5.69297	0.567453	8.59e-11	2.63e-10	24541	Positive	protein_coding	-1456	Promoter non-target gene eQTMs
ENSG00000267980	cg18581445	AC007292.6	chr19	0.592192	0.0735395	1.24e-07	2.85e-07	83732	Positive	antisense	-1456	Promoter non-target gene eQTMs
ENSG00000171817	cg07746323	ZNF540	chr19	30.4697	1.93263	6.01e-25	7.79e-24	82368	Positive	protein_coding	-1453	Promoter non-target gene eQTMs
ENSG00000185252	cg03308985	ZNF74	chr22	6.56742	0.723225	8.2e-11	2.52e-10	73914	Positive	protein_coding	-1452	Promoter non-target gene eQTMs
ENSG00000281348	cg05420668	CTD-2574D22.6	chr16	-0.629797	0.116761	0.00272136	0.00404533	937384	Negative	protein_coding	-1450	Promoter non-target gene eQTMs
ENSG00000138030	cg15478930	KHK	chr2	3.66581	0.36931	7.67e-11	2.36e-10	-342488	Positive	protein_coding	-1445	Promoter non-target gene eQTMs
ENSG00000237766	cg08960352	GGTA2P	chr12	0.494726	0.0606782	1.87e-09	5.11e-09	383939	Positive	processed_pseudogene	-1443	Promoter non-target gene eQTMs
ENSG00000184113	cg04601143	CLDN5	chr22	7.80505	0.76819	5.55e-08	1.32e-07	797167	Positive	protein_coding	-1442	Promoter non-target gene eQTMs
ENSG00000109184	cg04279629	DCUN1D4	chr4	-11.6546	1.12052	8.04e-15	3.64e-14	-1439	Positive	protein_coding	-1439	Promoter-eQTMs
ENSG00000111305	cg12749787	GSG1	chr12	9.55464	1.75557	0.00024922	0.00041446	-358087	Positive	protein_coding	-1434	Promoter non-target gene eQTMs
ENSG00000219085	cg05144187	NPM1P37	chr6	-0.945458	0.0617764	1.39e-24	1.73e-23	709085	Negative	processed_pseudogene	-1431	Promoter non-target gene eQTMs
ENSG00000269896	cg26295592	RP4-740C4.5	chr1	-1.74575	0.263135	4.26e-05	7.65e-05	-733570	Negative	transcribed_processed_pseudogene	-1429	Promoter non-target gene eQTMs
ENSG00000231259	cg06415678	AC125232.1	chr2	9.99336	1.04121	3.12e-13	1.21e-12	-468318	Negative	unprocessed_pseudogene	-1427	Promoter non-target gene eQTMs
ENSG00000132305	cg06415678	IMMT	chr2	11.4249	1.47933	5.85e-09	1.52e-08	419565	Positive	protein_coding	-1427	Promoter non-target gene eQTMs
ENSG00000116062	cg01352634	MSH6	chr2	-11.6483	1.03018	4.18e-15	1.95e-14	-211573	Negative	protein_coding	-1425	Promoter non-target gene eQTMs
ENSG00000271344	cg09879794	RP11-274B21.9	chr7	-2.05057	0.426295	0.0175204	0.0234392	-101726	Positive	lincRNA	-1420	Promoter non-target gene eQTMs
ENSG00000149922	cg05329317	TBX6	chr16	-1.27107	0.129797	8.09e-12	2.74e-11	29481	Negative	protein_coding	-1418	Promoter non-target gene eQTMs
ENSG00000163444	cg13134514	TMEM183A	chr1	-10.111	1.04885	1.11e-12	4.09e-12	196488	Negative	protein_coding	-1416	Promoter non-target gene eQTMs
ENSG00000182749	cg11238986	PAQR7	chr1	-1.3021	0.150852	6.32e-09	1.64e-08	669967	Positive	protein_coding	-1416	Promoter non-target gene eQTMs
ENSG00000117640	cg11238986	MTFR1L	chr1	8.01108	1.10989	1.01e-06	2.13e-06	-712537	Positive	protein_coding	-1416	Promoter non-target gene eQTMs
ENSG00000198892	cg13134514	SHISA4	chr1	4.18003	0.62191	4.9e-06	9.65e-06	-922206	Negative	protein_coding	-1416	Promoter non-target gene eQTMs
ENSG00000127720	cg26728895	METTL25	chr12	-1.46883	0.140543	5.58e-16	2.83e-15	-329767	Negative	protein_coding	-1415	Promoter non-target gene eQTMs
ENSG00000133773	cg26728895	CCDC59	chr12	-2.73736	0.373728	5.94e-07	1.28e-06	464614	Positive	protein_coding	-1415	Promoter non-target gene eQTMs
ENSG00000163660	cg06068627	CCNL1	chr3	-86.8408	6.05048	7.32e-22	6.74e-21	-470716	Positive	protein_coding	-1414	Promoter non-target gene eQTMs
ENSG00000068001	cg11048959	HYAL2	chr3	-3.72941	0.383114	1.5e-11	4.95e-11	-847680	Negative	protein_coding	-1407	Promoter non-target gene eQTMs
ENSG00000164106	cg16162058	SCRG1	chr4	-7.27304	1.09382	0.00537491	0.00770947	143975	Negative	protein_coding	-1406	Promoter non-target gene eQTMs
ENSG00000278266	cg02574703	RP11-575F12.3	chr12	-1.55939	0.239835	2.61e-06	5.28e-06	419477	Negative	lincRNA	-1402	Promoter non-target gene eQTMs
ENSG00000030066	cg19345165	NUP160	chr11	20.7563	1.20942	6.77e-25	8.7e-24	-198962	Positive	protein_coding	-1400	Promoter non-target gene eQTMs
ENSG00000082126	cg25820361	MPP4	chr2	392.764	30.6512	4.31e-19	2.98e-18	-780230	Positive	protein_coding	-1393	Promoter non-target gene eQTMs
ENSG00000106123	cg26960083	EPHB6	chr7	15.8719	1.13472	4.47e-20	3.42e-19	-554144	Positive	protein_coding	-1392	Promoter non-target gene eQTMs
ENSG00000198420	cg26960083	TCAF1	chr7	-6.77862	1.09259	8.02e-06	1.55e-05	-442170	Negative	protein_coding	-1392	Promoter non-target gene eQTMs
ENSG00000129493	cg23522852	HEATR5A	chr14	10.6621	1.32779	1.55e-09	4.27e-09	-265290	Positive	protein_coding	-1392	Promoter non-target gene eQTMs
ENSG00000070423	cg15456960	RNF126	chr19	-10.9587	0.374274	1.54e-48	5.52e-46	-74857	Positive	protein_coding	-1392	Promoter non-target gene eQTMs
ENSG00000141933	cg15456960	TPGS1	chr19	-2.24853	0.0819428	7.95e-46	1.64e-43	-65172	Negative	protein_coding	-1392	Promoter non-target gene eQTMs
ENSG00000118046	cg15456960	STK11	chr19	-17.3564	0.674818	3.04e-43	4.01e-41	604889	Negative	protein_coding	-1392	Promoter non-target gene eQTMs
ENSG00000065268	cg15456960	WDR18	chr19	-9.20975	0.392513	1.03e-39	8.12e-38	411602	Positive	protein_coding	-1392	Promoter non-target gene eQTMs
ENSG00000181588	cg15456960	MEX3D	chr19	-1.26438	0.0541631	5.29e-37	3.01e-35	-982000	Positive	protein_coding	-1392	Promoter non-target gene eQTMs
ENSG00000105556	cg15456960	MIER2	chr19	-7.7843	0.366717	1.54e-36	8.3e-35	271225	Negative	protein_coding	-1392	Promoter non-target gene eQTMs
ENSG00000011304	cg15456960	PTBP1	chr19	-15.0269	0.743826	3.5e-33	1.17e-31	224406	Negative	protein_coding	-1392	Promoter non-target gene eQTMs
ENSG00000130005	cg15456960	GAMT	chr19	-7.70462	0.40222	1.46e-32	4.42e-31	-824357	Negative	protein_coding	-1392	Promoter non-target gene eQTMs
ENSG00000115266	cg15456960	APC2	chr19	-44.0252	2.11384	1.03e-29	2.23e-28	873633	Negative	protein_coding	-1392	Promoter non-target gene eQTMs
ENSG00000183186	cg15456960	C2CD4C	chr19	-2.68253	0.150745	2.07e-28	3.94e-27	167224	Negative	protein_coding	-1392	Promoter non-target gene eQTMs
ENSG00000099864	cg15456960	PALM	chr19	-25.6084	1.41059	5.13e-28	9.26e-27	136266	Negative	protein_coding	-1392	Promoter non-target gene eQTMs
ENSG00000099821	cg15456960	POLRMT	chr19	-13.9256	0.816616	1.2e-27	2.1e-26	-44552	Negative	protein_coding	-1392	Promoter non-target gene eQTMs
ENSG00000119559	cg15456960	C19orf25	chr19	-6.32191	0.372777	1.16e-25	1.64e-24	-888474	Negative	protein_coding	-1392	Promoter non-target gene eQTMs
ENSG00000115257	cg15456960	PCSK4	chr19	-3.43554	0.208655	1.9e-25	2.61e-24	-908759	Positive	protein_coding	-1392	Promoter non-target gene eQTMs
ENSG00000228300	cg15456960	C19orf24	chr19	-3.28739	0.21313	2.51e-19	1.78e-18	702861	Positive	protein_coding	-1392	Promoter non-target gene eQTMs
ENSG00000115268	cg15456960	RPS15	chr19	-37.7808	2.88855	6.87e-18	4.23e-17	865689	Positive	protein_coding	-1392	Promoter non-target gene eQTMs
ENSG00000099866	cg15456960	MADCAM1	chr19	-1.00116	0.077352	1.93e-15	9.27e-15	-83493	Positive	protein_coding	-1392	Promoter non-target gene eQTMs
ENSG00000282535	cg15456960	AC092192.1	chr19	0.417438	0.0533585	5.55e-07	1.2e-06	-395773	Positive	lincRNA	-1392	Promoter non-target gene eQTMs
ENSG00000132763	cg00765921	MMACHC	chr1	1.6943	0.149711	3e-15	1.42e-14	-188305	Positive	protein_coding	-1391	Promoter non-target gene eQTMs
ENSG00000278983	cg07612974	RP11-426J5.3	chr18	0.308431	0.0358118	8.18e-09	2.1e-08	-927936	Positive	TEC	-1384	Promoter non-target gene eQTMs
ENSG00000182149	cg07553338	IST1	chr16	-22.3377	0.929492	8.88e-42	9.29e-40	281086	Positive	protein_coding	-1382	Promoter non-target gene eQTMs
ENSG00000262890	cg07553338	RP11-424M24.5	chr16	-0.615162	0.0570081	3.98e-13	1.52e-12	762827	Negative	lincRNA	-1382	Promoter non-target gene eQTMs
ENSG00000161202	cg13607248	DVL3	chr3	-19.7215	2.31057	1.98e-08	4.91e-08	-1391	Negative	protein_coding	-1380	Promoter-eQTMs
ENSG00000145198	cg13607248	VWA5B2	chr3	-2.32969	0.196646	1.44e-13	5.75e-13	73661	Positive	protein_coding	-1380	Promoter non-target gene eQTMs
ENSG00000175182	cg13607248	FAM131A	chr3	-3.38207	0.393815	5.88e-10	1.67e-09	179158	Positive	protein_coding	-1380	Promoter non-target gene eQTMs
ENSG00000173040	cg14844756	EVC2	chr4	0.588173	0.112992	0.00112108	0.00174039	1098697	Positive	protein_coding	-1378	Promoter non-target gene eQTMs
ENSG00000162804	cg14333539	SNED1	chr2	-6.54476	0.866534	3.3e-05	6e-05	-561479	Positive	protein_coding	-1376	Promoter non-target gene eQTMs
ENSG00000153922	cg00220905	CHD1	chr5	-10.5594	1.18619	5.03e-12	1.73e-11	-79144	Positive	protein_coding	-1372	Promoter non-target gene eQTMs
ENSG00000164244	cg16752652	PRRC1	chr5	4.73879	0.500677	1.26e-12	4.61e-12	-566918	Positive	protein_coding	-1355	Promoter non-target gene eQTMs
ENSG00000174306	cg00965748	ZHX3	chr20	11.671	2.28573	0.00105964	0.00164996	-487853	Negative	protein_coding	-1355	Promoter non-target gene eQTMs
ENSG00000132967	cg19803671	HMGB1P5	chr3	8.2191	0.43979	3e-33	1e-31	-822112	Positive	transcribed_processed_pseudogene	-1353	Promoter non-target gene eQTMs
ENSG00000176973	cg20909159	FAM89B	chr11	1.91814	0.255272	5.96e-07	1.28e-06	-286127	Positive	protein_coding	-1350	Promoter non-target gene eQTMs
ENSG00000255200	cg20909159	AP003068.18	chr11	-0.319554	0.042714	7.39e-07	1.58e-06	684359	Negative	transcribed_processed_pseudogene	-1350	Promoter non-target gene eQTMs
ENSG00000107862	cg08065637	GBF1	chr10	47.2964	10.3007	0.00907261	0.0126238	-175004	Positive	protein_coding	-1347	Promoter non-target gene eQTMs
ENSG00000153815	cg09021012	CMIP	chr16	-13.2857	1.14562	2.99e-16	1.55e-15	130403	Negative	protein_coding	-1344	Promoter non-target gene eQTMs
ENSG00000135698	cg09021012	MPHOSPH6	chr16	3.58766	0.438175	6.86e-09	1.78e-08	-833031	Positive	protein_coding	-1344	Promoter non-target gene eQTMs
ENSG00000203880	cg23854747	PCMTD2	chr20	-233.584	23.8801	2.43e-12	8.62e-12	274343	Positive	protein_coding	-1344	Promoter non-target gene eQTMs
ENSG00000243477	cg02134305	NAT6	chr3	-3.39332	0.290857	1.23e-16	6.64e-16	-826357	Negative	protein_coding	-1342	Promoter non-target gene eQTMs
ENSG00000001617	cg02134305	SEMA3F	chr3	-51.9771	4.35077	4.37e-16	2.24e-15	685000	Negative	protein_coding	-1342	Promoter non-target gene eQTMs
ENSG00000111906	cg08923450	HDDC2	chr6	-13.9655	2.86517	0.00191717	0.00289968	529043	Negative	protein_coding	-1341	Promoter non-target gene eQTMs
ENSG00000069812	cg11554771	HES2	chr1	1.93484	0.461547	0.0333656	0.0430892	-166888	Positive	protein_coding	-1338	Promoter non-target gene eQTMs
ENSG00000162631	cg01342222	NTNG1	chr1	4.85122	0.658449	6.76e-07	1.45e-06	-1061250	Positive	protein_coding	-1331	Promoter non-target gene eQTMs
ENSG00000279495	cg10157936	RP11-521B24.4	chr14	0.822783	0.111409	3.08e-07	6.83e-07	615988	Positive	TEC	-1330	Promoter non-target gene eQTMs
ENSG00000274444	cg19416470	RP11-128A17.2	chr15	-0.133347	0.0280379	0.00269516	0.00400807	8919	Negative	lincRNA	-1329	Promoter non-target gene eQTMs
ENSG00000133895	cg18501142	MEN1	chr11	9.00128	0.555255	2e-26	3.06e-25	695580	Positive	protein_coding	-1328	Promoter non-target gene eQTMs
ENSG00000074657	cg03096126	ZNF532	chr18	-15.3439	3.55872	0.0137452	0.0186672	-1327	Negative	protein_coding	-1327	Promoter-eQTMs
ENSG00000243960	cg01650919	RP11-552M11.4	chr1	-1.05419	0.0962884	1.56e-15	7.58e-15	551842	Negative	sense_overlapping	-1325	Promoter non-target gene eQTMs
ENSG00000116161	cg15340874	CACYBP	chr1	15.6852	2.19886	3.83e-06	7.62e-06	-1322	Negative	protein_coding	-1322	Promoter-eQTMs
ENSG00000143207	cg15340874	RFWD2	chr1	8.13752	0.883066	1.27e-11	4.22e-11	-944346	Positive	protein_coding	-1322	Promoter non-target gene eQTMs
ENSG00000214706	cg08574671	IFRD2	chr3	-2.32926	0.256384	3.7e-11	1.18e-10	13008	Negative	protein_coding	-1319	Promoter non-target gene eQTMs
ENSG00000179151	cg24374861	EDC3	chr15	3.98401	0.728207	0.00047719	0.00077104	-499966	Positive	protein_coding	-1314	Promoter non-target gene eQTMs
ENSG00000153914	cg16560309	SREK1	chr5	-74.4689	5.80611	4.05e-20	3.12e-19	213523	Negative	protein_coding	-1313	Promoter non-target gene eQTMs
ENSG00000113595	cg16560309	TRIM23	chr5	-13.8698	1.19789	1.11e-16	6.03e-16	336758	Negative	protein_coding	-1313	Promoter non-target gene eQTMs
ENSG00000253251	cg16560309	CTC-534A2.2	chr5	-1.12741	0.137661	1.05e-09	2.93e-09	-301683	Positive	protein_coding	-1313	Promoter non-target gene eQTMs
ENSG00000153015	cg16560309	CWC27	chr5	-3.26522	0.540152	8.35e-05	0.00014589	-1157518	Positive	protein_coding	-1313	Promoter non-target gene eQTMs
ENSG00000214562	cg01099580	NUTM2D	chr10	1.24943	0.198449	1.3e-05	2.46e-05	-147521	Positive	protein_coding	-1308	Promoter non-target gene eQTMs
ENSG00000173253	cg19464563	DMRT2	chr9	0.329938	0.0701486	0.00280568	0.00416397	-1307	Positive	protein_coding	-1307	Promoter-eQTMs
ENSG00000272661	cg02328113	RP4-548D19.3	chr7	-0.411588	0.064493	2e-05	3.71e-05	181885	Negative	antisense	-1304	Promoter non-target gene eQTMs
ENSG00000170537	cg05305993	TMC7	chr16	-0.540031	0.0730927	9.18e-07	1.94e-06	-83358	Negative	protein_coding	-1301	Promoter non-target gene eQTMs
ENSG00000260342	cg05305993	RP11-1035H13.3	chr16	-0.276184	0.0418623	8.45e-06	1.63e-05	279229	Negative	protein_coding	-1301	Promoter non-target gene eQTMs
ENSG00000082068	cg13324247	WDR70	chr5	-5.01451	0.282747	1.36e-31	3.68e-30	501154	Negative	protein_coding	-1299	Promoter non-target gene eQTMs
ENSG00000145604	cg13324247	SKP2	chr5	-2.0799	0.179183	9.12e-18	5.56e-17	-726069	Negative	protein_coding	-1299	Promoter non-target gene eQTMs
ENSG00000116679	cg00816620	IVNS1ABP	chr1	-20.8373	1.18023	7.82e-32	2.16e-30	-138019	Positive	protein_coding	-1297	Promoter non-target gene eQTMs
ENSG00000261069	cg01614564	RP11-701H24.4	chr15	1.46123	0.175161	6.05e-10	1.72e-09	131379	Positive	lincRNA	-1296	Promoter non-target gene eQTMs
ENSG00000138613	cg08638876	APH1B	chr15	10.4139	1.18828	1.66e-09	4.56e-09	-1294	Positive	protein_coding	-1294	Promoter-eQTMs
ENSG00000279434	cg26803100	RP11-85K15.3	chr14	0.130096	0.02675	0.00275308	0.00409005	210399	Positive	TEC	-1293	Promoter non-target gene eQTMs
ENSG00000099622	cg06644105	CIRBP	chr19	119.876	27.4553	0.0343224	0.044224	-1291	Positive	protein_coding	-1291	Promoter-eQTMs
ENSG00000116668	cg00816620	SWT1	chr1	-2.53905	0.241538	7.78e-13	2.91e-12	-1289	Negative	protein_coding	-1289	Promoter-eQTMs
ENSG00000166263	cg25431220	STXBP4	chr17	7.45487	1.10555	1.16e-06	2.43e-06	68053	Negative	protein_coding	-1287	Promoter non-target gene eQTMs
ENSG00000135070	cg09654291	ISCA1	chr9	-4.69934	1.09742	0.00847362	0.01184	683928	Negative	protein_coding	-1285	Promoter non-target gene eQTMs
ENSG00000111052	cg05981335	LIN7A	chr12	40.7697	7.20523	5.04e-05	8.99e-05	-83737	Positive	protein_coding	-1285	Promoter non-target gene eQTMs
ENSG00000013288	cg10132348	MAN2B2	chr4	14.0963	0.75488	8.22e-32	2.27e-30	-207477	Positive	protein_coding	-1277	Promoter non-target gene eQTMs
ENSG00000184985	cg10132348	SORCS2	chr4	36.2249	2.54567	9.56e-21	7.84e-20	409886	Positive	protein_coding	-1277	Promoter non-target gene eQTMs
ENSG00000072832	cg10132348	CRMP1	chr4	46.8377	3.76438	4.15e-17	2.35e-16	1034568	Negative	protein_coding	-1277	Promoter non-target gene eQTMs
ENSG00000160781	cg03055346	PAQR6	chr1	9.63984	1.14777	1.7e-07	3.87e-07	616968	Positive	protein_coding	-1270	Promoter non-target gene eQTMs
ENSG00000152578	cg20306837	GRIA4	chr11	-13.5611	3.45078	0.0193846	0.0257763	-1267	Negative	protein_coding	-1267	Promoter-eQTMs
ENSG00000179218	cg02000253	CALR	chr19	-24.4765	5.03926	0.0162218	0.0218065	-58295	Negative	protein_coding	-1265	Promoter non-target gene eQTMs
ENSG00000143624	cg26036199	INTS3	chr1	-41.8232	3.98305	2.92e-14	1.25e-13	-239730	Negative	protein_coding	-1264	Promoter non-target gene eQTMs
ENSG00000280739	cg10639933	EIF1B-AS1	chr3	1.09932	0.0772388	1.35e-19	9.85e-19	-676500	Positive	processed_transcript	-1262	Promoter non-target gene eQTMs
ENSG00000123066	cg16151352	MED13L	chr12	41.0445	4.56631	5.6e-11	1.75e-10	708972	Negative	protein_coding	-1262	Promoter non-target gene eQTMs
ENSG00000126461	cg22310976	SCAF1	chr19	29.78	0.941765	3.72e-54	2.97e-51	676975	Positive	protein_coding	-1259	Promoter non-target gene eQTMs
ENSG00000142235	cg22310976	LMTK3	chr19	9.48038	0.384002	1.01e-43	1.44e-41	479963	Positive	protein_coding	-1259	Promoter non-target gene eQTMs
ENSG00000104973	cg22310976	MED25	chr19	16.0517	0.778659	5.52e-36	2.75e-34	853045	Positive	protein_coding	-1259	Promoter non-target gene eQTMs
ENSG00000161618	cg22310976	ALDH16A1	chr19	3.35861	0.178982	3.83e-28	7.01e-27	487991	Positive	protein_coding	-1259	Promoter non-target gene eQTMs
ENSG00000169169	cg22310976	CPT1C	chr19	14.1839	0.818153	1.5e-27	2.6e-26	725664	Negative	protein_coding	-1259	Promoter non-target gene eQTMs
ENSG00000063180	cg22310976	CA11	chr19	17.5065	1.05266	7.51e-27	1.21e-25	327288	Positive	protein_coding	-1259	Promoter non-target gene eQTMs
ENSG00000063176	cg22310976	SPHK2	chr19	4.4593	0.297157	3.84e-24	4.58e-23	-345943	Positive	protein_coding	-1259	Promoter non-target gene eQTMs
ENSG00000213024	cg22310976	NUP62	chr19	5.0161	0.379255	1.56e-19	1.13e-18	-941591	Positive	protein_coding	-1259	Promoter non-target gene eQTMs
ENSG00000039650	cg22310976	PNKP	chr19	5.51314	0.471365	2.83e-15	1.34e-14	-894648	Positive	protein_coding	-1259	Promoter non-target gene eQTMs
ENSG00000105538	cg22310976	RASIP1	chr19	0.625761	0.0445884	1.09e-14	4.87e-14	244649	Positive	protein_coding	-1259	Promoter non-target gene eQTMs
ENSG00000105438	cg22310976	KDELR1	chr19	6.79838	0.645466	4.51e-13	1.72e-12	582659	Negative	protein_coding	-1259	Promoter non-target gene eQTMs
ENSG00000181215	cg11117765	C4orf50	chr4	-4.71559	0.294235	1.11e-23	1.25e-22	1145773	Negative	protein_coding	-1247	Promoter non-target gene eQTMs
ENSG00000016082	cg14916382	ISL1	chr5	5.6936	1.33154	0.00742478	0.0104543	716305	Positive	protein_coding	-1244	Promoter non-target gene eQTMs
ENSG00000090382	cg03559836	LYZ	chr12	-3.77154	0.616365	0.00010364	0.00017912	107560	Negative	protein_coding	-1244	Promoter non-target gene eQTMs
ENSG00000166337	cg17964980	TAF10	chr11	3.54219	0.663262	0.00063782	0.00101666	907464	Positive	protein_coding	-1243	Promoter non-target gene eQTMs
ENSG00000271913	cg04368067	RP1-111C20.4	chr6	2.53719	0.13512	1.1e-31	3e-30	168927	Positive	antisense	-1240	Promoter non-target gene eQTMs
ENSG00000169223	cg07035740	LMAN2	chr5	13.5361	0.77657	3.03e-29	6.24e-28	-700828	Negative	protein_coding	-1239	Promoter non-target gene eQTMs
ENSG00000228434	cg07097673	AC004951.6	chr7	-4.64941	0.277038	6.72e-26	9.72e-25	982703	Negative	lincRNA	-1239	Promoter non-target gene eQTMs
ENSG00000175164	cg01309153	ABO	chr9	-0.32156	0.058861	0.00537619	0.00771066	107389	Negative	protein_coding	-1238	Promoter non-target gene eQTMs
ENSG00000160284	cg02395981	SPATC1L	chr21	-1.8474	0.114359	1.51e-25	2.1e-24	163964	Negative	protein_coding	-1237	Promoter non-target gene eQTMs
ENSG00000177301	cg02605776	KCNA2	chr1	-24.3728	5.49239	0.0226751	0.029914	444701	Negative	protein_coding	-1236	Promoter non-target gene eQTMs
ENSG00000118600	cg23549160	TMEM5	chr12	-4.22745	0.482972	3.94e-11	1.25e-10	627627	Negative	protein_coding	-1234	Promoter non-target gene eQTMs
ENSG00000109118	cg14557909	PHF12	chr17	-10.1821	1.66385	4.34e-05	7.79e-05	-176761	Negative	protein_coding	-1231	Promoter non-target gene eQTMs
ENSG00000171160	cg06636246	MORN4	chr10	5.76309	0.575551	6.36e-13	2.4e-12	-781063	Positive	protein_coding	-1230	Promoter non-target gene eQTMs
ENSG00000081377	cg10846470	CDC14B	chr9	-3.87129	0.334431	4.71e-17	2.65e-16	-982778	Negative	protein_coding	-1228	Promoter non-target gene eQTMs
ENSG00000225194	cg10846470	LINC00092	chr9	1.26999	0.119634	4.81e-12	1.66e-11	-512261	Positive	lincRNA	-1228	Promoter non-target gene eQTMs
ENSG00000149639	cg02480104	SOGA1	chr20	-25.766	2.01209	3.09e-18	1.97e-17	402186	Negative	protein_coding	-1223	Promoter non-target gene eQTMs
ENSG00000101413	cg02480104	RPRD1B	chr20	8.74817	0.804712	2.98e-14	1.27e-13	853913	Positive	protein_coding	-1223	Promoter non-target gene eQTMs
ENSG00000166275	cg11453585	BORCS7	chr10	6.95446	0.839364	4.27e-09	1.13e-08	350292	Positive	protein_coding	-1220	Promoter non-target gene eQTMs
ENSG00000198728	cg11453585	LDB1	chr10	-12.6319	1.84243	2.45e-06	4.98e-06	396371	Negative	protein_coding	-1220	Promoter non-target gene eQTMs
ENSG00000271327	cg16431687	RP11-1109F11.3	chr12	-0.58046	0.0635086	5.94e-12	2.03e-11	-158213	Negative	lincRNA	-1214	Promoter non-target gene eQTMs
ENSG00000101745	cg07376838	ANKRD12	chr18	34.5017	4.85803	1.03e-06	2.17e-06	-1213	Positive	protein_coding	-1213	Promoter-eQTMs
ENSG00000111653	cg19720347	ING4	chr12	-3.08064	0.358646	2.76e-09	7.42e-09	264656	Negative	protein_coding	-1212	Promoter non-target gene eQTMs
ENSG00000107099	cg06450048	DOCK8	chr9	-7.91839	1.15104	1.18e-06	2.47e-06	-1210	Negative	protein_coding	-1210	Promoter-eQTMs
ENSG00000267506	cg10430734	RP11-13K12.1	chr17	-3.06777	0.314912	8.1e-10	2.28e-09	-1210	Negative	lincRNA	-1210	Promoter-eQTMs
ENSG00000119280	cg26003818	C1orf198	chr1	19.449	3.10379	4.01e-05	7.22e-05	501194	Positive	protein_coding	-1209	Promoter non-target gene eQTMs
ENSG00000272983	cg15799959	RP11-508N22.12	chr10	-1.4637	0.18992	3.41e-09	9.1e-09	279821	Negative	lincRNA	-1206	Promoter non-target gene eQTMs
ENSG00000138439	cg26648948	FAM117B	chr2	3.43889	0.67351	0.00100298	0.00156535	-694454	Positive	protein_coding	-1204	Promoter non-target gene eQTMs
ENSG00000164961	cg18455759	KIAA0196	chr8	-2.78532	0.536265	0.0034979	0.00513152	407265	Negative	protein_coding	-1204	Promoter non-target gene eQTMs
ENSG00000139291	cg00136643	TMEM19	chr12	4.07192	0.858184	0.00168508	0.00256743	21874	Positive	protein_coding	-1204	Promoter non-target gene eQTMs
ENSG00000179796	cg06088918	LRRC3B	chr3	1.01394	0.151489	1.78e-05	3.33e-05	-1091303	Positive	protein_coding	-1199	Promoter non-target gene eQTMs
ENSG00000146386	cg21186663	ABRACL	chr6	-1.03123	0.225562	0.00530957	0.00762071	-347070	Negative	protein_coding	-1195	Promoter non-target gene eQTMs
ENSG00000172301	cg19914345	COPRS	chr17	7.68472	0.430129	2.27e-29	4.74e-28	156011	Negative	protein_coding	-1194	Promoter non-target gene eQTMs
ENSG00000108651	cg19914345	UTP6	chr17	6.50391	0.494303	2.27e-20	1.79e-19	146978	Positive	protein_coding	-1194	Promoter non-target gene eQTMs
ENSG00000166770	cg21287936	ZNF667-AS1	chr19	-4.3335	0.765089	0.00026655	0.0004417	-1193	Negative	lincRNA	-1193	Promoter-eQTMs
ENSG00000014641	cg15853117	MDH1	chr2	-55.0923	3.20703	2.53e-28	4.76e-27	538778	Positive	protein_coding	-1191	Promoter non-target gene eQTMs
ENSG00000143952	cg15853117	VPS54	chr2	-16.6386	1.13287	2.9e-22	2.8e-21	-842315	Negative	protein_coding	-1191	Promoter non-target gene eQTMs
ENSG00000169764	cg15853117	UGP2	chr2	-14.4635	1.40159	7.14e-13	2.68e-12	791109	Positive	protein_coding	-1191	Promoter non-target gene eQTMs
ENSG00000183010	cg17955752	PYCR1	chr17	-0.958363	0.0885919	3.64e-10	1.06e-09	45612	Negative	protein_coding	-1189	Promoter non-target gene eQTMs
ENSG00000113068	cg21293250	PFDN1	chr5	2.60294	0.564483	0.010106	0.0139787	447575	Positive	protein_coding	-1188	Promoter non-target gene eQTMs
ENSG00000258900	cg19924714	HNRNPCP1	chr14	-1.0549	0.188008	0.00281213	0.00417214	-668611	Negative	processed_pseudogene	-1188	Promoter non-target gene eQTMs
ENSG00000120539	cg14240646	MASTL	chr10	-0.449743	0.0807786	0.00015048	0.0002553	-88492	Negative	protein_coding	-1186	Promoter non-target gene eQTMs
ENSG00000141441	cg06485671	GAREM1	chr18	9.98338	1.14825	1.77e-10	5.28e-10	646095	Positive	protein_coding	-1177	Promoter non-target gene eQTMs
ENSG00000101470	cg06670911	TNNC2	chr20	1.53242	0.16779	5.45e-08	1.3e-07	68105	Positive	protein_coding	-1175	Promoter non-target gene eQTMs
ENSG00000122574	cg18003762	WIPF3	chr7	-8.14146	0.727261	1.19e-14	5.29e-14	-183288	Negative	protein_coding	-1174	Promoter non-target gene eQTMs
ENSG00000103479	cg21987164	RBL2	chr16	-26.25	2.02735	8.86e-20	6.6e-19	-852799	Negative	protein_coding	-1172	Promoter non-target gene eQTMs
ENSG00000226210	cg08285180	WASH7P	chr12	-24.5833	2.21454	1.79e-14	7.83e-14	976700	Negative	unprocessed_pseudogene	-1169	Promoter non-target gene eQTMs
ENSG00000151067	cg08285180	CACNA1C	chr12	-9.28738	1.10075	3.01e-09	8.07e-09	979564	Positive	protein_coding	-1169	Promoter non-target gene eQTMs
ENSG00000111186	cg08285180	WNT5B	chr12	-4.80499	0.764586	0.00024567	0.00040868	538669	Negative	protein_coding	-1169	Promoter non-target gene eQTMs
ENSG00000226318	cg02774862	RP11-474D14.2	chr10	-0.913585	0.0595168	4.41e-27	7.3e-26	601121	Positive	processed_pseudogene	-1167	Promoter non-target gene eQTMs
ENSG00000119711	cg14660362	ALDH6A1	chr14	13.8225	1.76991	2.95e-07	6.55e-07	656252	Positive	protein_coding	-1166	Promoter non-target gene eQTMs
ENSG00000261159	cg22259778	RP11-723O4.9	chr3	0.733195	0.124278	0.00135006	0.00207484	302485	Positive	lincRNA	-1165	Promoter non-target gene eQTMs
ENSG00000215472	cg24513433	RPL17-C18orf32	chr18	-14.2432	1.19314	4.78e-17	2.69e-16	80183	Negative	protein_coding	-1165	Promoter non-target gene eQTMs
ENSG00000154832	cg24513433	CXXC1	chr18	11.0031	0.970626	1.54e-16	8.24e-16	-720479	Negative	protein_coding	-1165	Promoter non-target gene eQTMs
ENSG00000188352	cg27041724	FOCAD	chr9	-4.67042	0.595835	3.94e-09	1.04e-08	34603	Positive	protein_coding	-1163	Promoter non-target gene eQTMs
ENSG00000196993	cg04417023	NPIPB9	chr16	-0.80235	0.11968	2.14e-06	4.37e-06	-127781	Negative	protein_coding	-1163	Promoter non-target gene eQTMs
ENSG00000272701	cg05222316	MESTIT1	chr7	0.302929	0.033437	1.65e-10	4.93e-10	625216	Positive	antisense	-1162	Promoter non-target gene eQTMs
ENSG00000108515	cg18194052	ENO3	chr17	3.97821	0.663859	0.00019259	0.00032353	-1161	Positive	protein_coding	-1161	Promoter-eQTMs
ENSG00000129219	cg18194052	PLD2	chr17	9.45287	1.207	1.64e-07	3.74e-07	-142101	Positive	protein_coding	-1161	Promoter non-target gene eQTMs
ENSG00000173621	cg06312776	LRFN4	chr11	5.13851	0.216268	3.16e-38	2.15e-36	-750033	Positive	protein_coding	-1159	Promoter non-target gene eQTMs
ENSG00000172725	cg06312776	CORO1B	chr11	15	0.824733	1.22e-30	2.96e-29	171170	Positive	protein_coding	-1159	Promoter non-target gene eQTMs
ENSG00000173599	cg06312776	PC	chr11	8.82016	0.521627	1.79e-26	2.75e-25	758263	Positive	protein_coding	-1159	Promoter non-target gene eQTMs
ENSG00000110717	cg06312776	NDUFS8	chr11	12.6833	0.787868	7.17e-26	1.03e-24	423937	Negative	protein_coding	-1159	Promoter non-target gene eQTMs
ENSG00000162337	cg06312776	LRP5	chr11	10.7837	0.652406	1.33e-25	1.86e-24	705911	Negative	protein_coding	-1159	Promoter non-target gene eQTMs
ENSG00000110697	cg06312776	PITPNM1	chr11	84.8852	5.71101	5.89e-23	6.12e-22	114912	Negative	protein_coding	-1159	Promoter non-target gene eQTMs
ENSG00000172932	cg06312776	ANKRD13D	chr11	8.4308	0.60072	6.76e-22	6.25e-21	-318133	Positive	protein_coding	-1159	Promoter non-target gene eQTMs
ENSG00000110711	cg06312776	AIP	chr11	9.02314	0.662334	1.53e-19	1.11e-18	-123654	Negative	protein_coding	-1159	Promoter non-target gene eQTMs
ENSG00000167799	cg06312776	NUDT8	chr11	0.482306	0.0415019	1.72e-15	8.31e-15	-21258	Negative	protein_coding	-1159	Promoter non-target gene eQTMs
ENSG00000172273	cg08325835	HINFP	chr11	-8.10865	0.719982	7.59e-15	3.45e-14	719274	Positive	protein_coding	-1159	Promoter non-target gene eQTMs
ENSG00000110066	cg06312776	KMT5B	chr11	-16.8176	1.58689	2.49e-14	1.07e-13	-548183	Negative	protein_coding	-1159	Promoter non-target gene eQTMs
ENSG00000171067	cg06312776	C11orf24	chr11	1.97469	0.179634	4.39e-14	1.85e-13	-654658	Negative	protein_coding	-1159	Promoter non-target gene eQTMs
ENSG00000181722	cg04403629	ZBTB20	chr3	29.8955	2.5069	1.38e-15	6.74e-15	833926	Positive	protein_coding	-1156	Promoter-eQTMs
ENSG00000271714	cg12175862	CTD-2377O17.1	chr5	0.904586	0.0872633	1.85e-13	7.32e-13	-1154	Positive	antisense	-1154	Promoter-eQTMs
ENSG00000103061	cg09986774	SLC7A6OS	chr16	-1.80154	0.281496	1.8e-05	3.36e-05	847940	Negative	protein_coding	-1152	Promoter non-target gene eQTMs
ENSG00000160255	cg21885868	ITGB2	chr21	-4.8162	0.890035	0.00928472	0.0129026	403097	Negative	protein_coding	-1152	Promoter non-target gene eQTMs
ENSG00000180447	cg18281146	GAS1	chr9	-6.44444	0.791576	3.49e-09	9.3e-09	554017	Negative	protein_coding	-1151	Promoter non-target gene eQTMs
ENSG00000131495	cg06776159	NDUFA2	chr5	-5.16588	0.827384	3.47e-05	6.3e-05	765340	Negative	protein_coding	-1148	Promoter non-target gene eQTMs
ENSG00000008277	cg17561891	ADAM22	chr7	-8.47377	1.95547	0.00952394	0.0132172	714286	Negative	protein_coding	-1145	Promoter non-target gene eQTMs
ENSG00000188739	cg25276149	RBM34	chr1	3.19034	0.560697	0.00015968	0.00027037	-757855	Positive	protein_coding	-1142	Promoter non-target gene eQTMs
ENSG00000266490	cg14447519	CTD-2349P21.9	chr17	-0.939897	0.222343	0.0195477	0.0259832	-600392	Negative	lincRNA	-1140	Promoter non-target gene eQTMs
ENSG00000181827	cg10437377	RFX7	chr15	-7.43153	0.998028	5.34e-08	1.27e-07	157121	Positive	protein_coding	-1135	Promoter-eQTMs
ENSG00000198624	cg01970941	CCDC69	chr5	-2.81321	0.556621	0.00353339	0.00518228	-564563	Negative	protein_coding	-1135	Promoter non-target gene eQTMs
ENSG00000205765	cg24779990	C5orf51	chr5	18.5637	4.17463	0.0069262	0.00979308	-520724	Positive	protein_coding	-1135	Promoter non-target gene eQTMs
ENSG00000164930	cg21553946	FZD6	chr8	-12.539	1.52243	8.96e-10	2.52e-09	-203450	Negative	protein_coding	-1135	Promoter non-target gene eQTMs
ENSG00000069869	cg10437377	NEDD4	chr15	-4.37489	0.437904	8.96e-13	3.32e-12	417479	Negative	protein_coding	-1135	Promoter non-target gene eQTMs
ENSG00000166450	cg10437377	PRTG	chr15	-26.5367	2.75554	1.77e-12	6.37e-12	632857	Positive	protein_coding	-1135	Promoter non-target gene eQTMs
ENSG00000164164	cg22511684	OTUD4	chr4	-25.4712	1.87351	9.78e-21	8.01e-20	-463684	Positive	protein_coding	-1133	Promoter non-target gene eQTMs
ENSG00000175538	cg09661809	KCNE3	chr11	9.89046	1.49416	2.13e-05	3.94e-05	787196	Negative	protein_coding	-1132	Promoter non-target gene eQTMs
ENSG00000245498	cg19571034	RP11-677M14.7	chr11	3.25631	0.159652	1.34e-34	5.55e-33	-792417	Positive	antisense	-1129	Promoter non-target gene eQTMs
ENSG00000279342	cg19571034	AP000866.1	chr11	0.594908	0.0370484	2.79e-26	4.2e-25	803601	Positive	protein_coding	-1129	Promoter non-target gene eQTMs
ENSG00000175305	cg07473471	CCNE2	chr8	-0.865089	0.099515	1.72e-09	4.72e-09	-239176	Negative	protein_coding	-1127	Promoter non-target gene eQTMs
ENSG00000172638	cg25136171	EFEMP2	chr11	9.35232	0.844629	1.94e-11	6.33e-11	53803	Positive	protein_coding	-1127	Promoter non-target gene eQTMs
ENSG00000213433	cg23158483	RPLP1P6	chr5	0.407307	0.0364701	4.38e-12	1.52e-11	160108	Positive	transcribed_processed_pseudogene	-1125	Promoter non-target gene eQTMs
ENSG00000107968	cg01267522	MAP3K8	chr10	-8.37097	0.99049	3.24e-09	8.67e-09	-885598	Negative	protein_coding	-1124	Promoter non-target gene eQTMs
ENSG00000141564	cg14209926	RPTOR	chr17	-17.3756	0.803872	1.37e-35	6.46e-34	-1347095	Negative	protein_coding	-1124	Promoter non-target gene eQTMs
ENSG00000175866	cg14209926	BAIAP2	chr17	-9.94073	0.842013	2.09e-12	7.47e-12	-856792	Negative	protein_coding	-1124	Promoter non-target gene eQTMs
ENSG00000226137	cg14209926	BAIAP2-AS1	chr17	-6.30818	0.689125	1.06e-10	3.22e-10	862784	Negative	lincRNA	-1124	Promoter non-target gene eQTMs
ENSG00000154146	cg24352075	NRGN	chr11	1.31	0.082343	1.33e-25	1.86e-24	-852893	Positive	protein_coding	-1123	Promoter non-target gene eQTMs
ENSG00000196345	cg01147013	ZKSCAN7	chr3	3.17213	0.368809	1.81e-10	5.39e-10	-421170	Negative	protein_coding	-1122	Promoter non-target gene eQTMs
ENSG00000250326	cg00561562	RP11-284M14.1	chr4	1.02802	0.109515	8.29e-13	3.09e-12	581390	Positive	antisense	-1122	Promoter non-target gene eQTMs
ENSG00000166183	cg20161572	ASPG	chr14	-1.06745	0.119642	3.35e-09	8.95e-09	522668	Negative	protein_coding	-1122	Promoter non-target gene eQTMs
ENSG00000189091	cg06074992	SF3B3	chr16	8.60736	1.40237	2.82e-05	5.16e-05	-1040859	Positive	protein_coding	-1122	Promoter non-target gene eQTMs
ENSG00000159387	cg07254066	IRX6	chr16	1.97584	0.154081	2.86e-18	1.83e-17	391777	Negative	protein_coding	-1121	Promoter non-target gene eQTMs
ENSG00000087245	cg07254066	MMP2	chr16	5.62045	0.734696	3.53e-08	8.56e-08	457717	Positive	protein_coding	-1121	Promoter non-target gene eQTMs
ENSG00000196689	cg25955817	TRPV1	chr17	12.2569	2.16142	0.0004762	0.00076972	104358	Positive	protein_coding	-1120	Promoter non-target gene eQTMs
ENSG00000169635	cg15477600	HIC2	chr22	-5.95015	0.575053	5.06e-13	1.92e-12	-224593	Positive	protein_coding	-1120	Promoter non-target gene eQTMs
ENSG00000135049	cg14079243	AGTPBP1	chr9	20.0701	2.43667	9.54e-10	2.67e-09	196608	Positive	protein_coding	-1118	Promoter-eQTMs
ENSG00000151090	cg08175029	THRB	chr3	-11.4433	2.02736	0.00010065	0.00017433	-310132	Negative	protein_coding	-1118	Promoter non-target gene eQTMs
ENSG00000175426	cg06166809	PCSK1	chr5	8.50545	1.96645	0.0126516	0.0172647	-769137	Positive	protein_coding	-1118	Promoter non-target gene eQTMs
ENSG00000230303	cg14079243	RP11-213G2.2	chr9	-1.0482	0.0352843	7.95e-56	8.22e-53	-40521	Negative	lincRNA	-1118	Promoter non-target gene eQTMs
ENSG00000165121	cg14079243	RP11-213G2.3	chr9	2.09547	0.175771	5.32e-17	2.97e-16	62212	Negative	transcribed_unprocessed_pseudogene	-1118	Promoter non-target gene eQTMs
ENSG00000083223	cg14079243	ZCCHC6	chr9	2.15095	0.302368	5.59e-08	1.33e-07	-544586	Positive	protein_coding	-1118	Promoter non-target gene eQTMs
ENSG00000106211	cg04866162	HSPB1	chr7	-21.1933	2.31153	1.2e-08	3.03e-08	-987	Negative	protein_coding	-1116	Promoter-eQTMs
ENSG00000126243	cg06880365	LRFN3	chr19	4.66599	0.174868	1.04e-44	1.76e-42	-443784	Negative	protein_coding	-1114	Promoter non-target gene eQTMs
ENSG00000233527	cg06880365	ZNF529-AS1	chr19	2.14741	0.0850849	1.74e-38	1.21e-36	193928	Negative	antisense	-1114	Promoter non-target gene eQTMs
ENSG00000218582	cg17832805	GAPDHP63	chr6	0.334438	0.0228782	3.89e-21	3.3e-20	-718175	Negative	processed_pseudogene	-1112	Promoter non-target gene eQTMs
ENSG00000149485	cg03805684	FADS1	chr11	-24.0546	5.53415	0.0235084	0.0309623	-5878	Negative	protein_coding	-1110	Promoter non-target gene eQTMs
ENSG00000055147	cg08607540	FAM114A2	chr5	11.1807	1.73352	2.87e-06	5.78e-06	456809	Negative	protein_coding	-1107	Promoter non-target gene eQTMs
ENSG00000133597	cg09658576	ADCK2	chr7	4.87331	0.714234	6.86e-07	1.47e-06	894787	Positive	protein_coding	-1107	Promoter non-target gene eQTMs
ENSG00000166548	cg08288561	TK2	chr16	4.88829	0.998252	0.00286663	0.00424906	-79599	Positive	protein_coding	-1107	Promoter non-target gene eQTMs
ENSG00000105254	cg14198223	TBCB	chr19	-18.2417	1.55973	1.65e-15	7.99e-15	-264841	Negative	protein_coding	-1102	Promoter non-target gene eQTMs
ENSG00000065548	cg07993132	ZC3H15	chr2	-12.1324	0.904426	6.52e-22	6.04e-21	-1003	Negative	protein_coding	-1100	Promoter-eQTMs
ENSG00000231646	cg07993132	FSIP2-AS1	chr2	-0.333329	0.0299361	6.83e-17	3.78e-16	834882	Positive	antisense	-1100	Promoter non-target gene eQTMs
ENSG00000257354	cg22691340	RP11-631N16.2	chr12	-1.75009	0.231155	3.15e-08	7.67e-08	-1099	Positive	lincRNA	-1099	Promoter-eQTMs
ENSG00000135655	cg22691340	USP15	chr12	-48.232	3.39815	4.22e-23	4.47e-22	-343513	Negative	protein_coding	-1099	Promoter non-target gene eQTMs
ENSG00000177990	cg22691340	DPY19L2	chr12	-12.1306	1.70737	5.96e-06	1.17e-05	-955062	Negative	protein_coding	-1099	Promoter non-target gene eQTMs
ENSG00000237580	cg04647948	GCSHP3	chr2	-0.241006	0.0236829	1.28e-13	5.13e-13	-30411	Negative	processed_pseudogene	-1094	Promoter non-target gene eQTMs
ENSG00000197122	cg20079898	SRC	chr20	-14.9082	2.26443	2.56e-05	4.7e-05	165183	Negative	protein_coding	-1092	Promoter non-target gene eQTMs
ENSG00000153827	cg23011754	TRIP12	chr2	75.6604	8.94034	9.31e-11	2.85e-10	950095	Positive	protein_coding	-1088	Promoter non-target gene eQTMs
ENSG00000280162	cg14474669	RP11-314N13.9	chr20	-0.146801	0.0295232	0.0116224	0.0159444	-781989	Negative	TEC	-1088	Promoter non-target gene eQTMs
ENSG00000153140	cg11589797	CETN3	chr5	-5.2904	0.434727	3.68e-19	2.56e-18	18612	Negative	protein_coding	-1087	Promoter-eQTMs
ENSG00000165655	cg19271099	ZNF503	chr10	3.88975	0.163065	2.52e-41	2.46e-39	5163	Positive	protein_coding	-1087	Promoter-eQTMs
ENSG00000267022	cg03571548	AC084219.2	chr19	-1.95142	0.147614	2.51e-19	1.78e-18	449630	Negative	protein_coding	-1086	Promoter non-target gene eQTMs
ENSG00000239467	cg20961425	AC007405.6	chr2	0.565714	0.047583	5.92e-18	3.66e-17	938335	Positive	lincRNA	-1085	Promoter non-target gene eQTMs
ENSG00000281501	cg22877957	SEPSECS-AS1	chr4	-1.01229	0.177371	0.00013518	0.00023065	-1083	Negative	antisense	-1083	Promoter-eQTMs
ENSG00000157036	cg07895684	EXOG	chr3	-3.1358	0.462327	1.7e-06	3.51e-06	357803	Negative	protein_coding	-1082	Promoter non-target gene eQTMs
ENSG00000164105	cg07681935	SAP30	chr4	-3.7429	0.373709	1.77e-12	6.37e-12	-161341	Positive	protein_coding	-1081	Promoter non-target gene eQTMs
ENSG00000272870	cg07681935	RP11-798M19.6	chr4	-7.79449	1.02405	2.25e-08	5.55e-08	181767	Negative	antisense	-1081	Promoter non-target gene eQTMs
ENSG00000164104	cg07681935	HMGB2	chr4	-18.5554	3.04876	2.14e-05	3.96e-05	199615	Negative	protein_coding	-1081	Promoter non-target gene eQTMs
ENSG00000149313	cg09980522	AASDHPPT	chr11	-9.78606	1.28738	8.07e-09	2.08e-08	464426	Negative	protein_coding	-1081	Promoter non-target gene eQTMs
ENSG00000172554	cg11691429	SNTG2	chr2	-0.916743	0.183978	0.00282425	0.00418906	-1099	Negative	protein_coding	-1080	Promoter-eQTMs
ENSG00000143924	cg15200793	EML4	chr2	-16.5977	1.45811	3.69e-15	1.73e-14	-325824	Positive	protein_coding	-1080	Promoter non-target gene eQTMs
ENSG00000178852	cg25173405	EFCAB13	chr17	-0.869391	0.119152	5.11e-06	1.01e-05	-1077	Negative	protein_coding	-1077	Promoter-eQTMs
ENSG00000171806	cg02837999	METTL18	chr1	-1.53657	0.140288	1.16e-15	5.72e-15	-423486	Negative	protein_coding	-1076	Promoter non-target gene eQTMs
ENSG00000273355	cg17439660	RP11-672L10.6	chr18	-1.14353	0.139231	8.74e-10	2.46e-09	-92745	Negative	lincRNA	-1076	Promoter non-target gene eQTMs
ENSG00000132199	cg17439660	ENOSF1	chr18	-34.26	4.11595	1.06e-09	2.96e-09	235701	Negative	protein_coding	-1076	Promoter non-target gene eQTMs
ENSG00000148053	cg08172780	NTRK2	chr9	67.5303	16.2176	0.0189653	0.025255	959883	Negative	protein_coding	-1074	Promoter non-target gene eQTMs
ENSG00000101695	cg18968597	RNF125	chr18	0.465724	0.0707214	1.46e-05	2.75e-05	-452733	Negative	protein_coding	-1074	Promoter non-target gene eQTMs
ENSG00000117475	cg02837999	BLZF1	chr1	-4.76161	0.5472	4.48e-10	1.29e-09	-1073	Negative	protein_coding	-1073	Promoter-eQTMs
ENSG00000250208	cg16498194	FZD10-AS1	chr12	14.8994	1.88924	1.07e-06	2.25e-06	19014	Positive	processed_transcript	-1073	Promoter-eQTMs
ENSG00000249751	cg13009654	ECSCR	chr5	-0.366881	0.0866451	0.0288798	0.0376026	-981997	Negative	protein_coding	-1073	Promoter non-target gene eQTMs
ENSG00000078295	cg25212262	ADCY2	chr5	17.9274	4.20479	0.0153342	0.0206909	682129	Negative	protein_coding	-1072	Promoter non-target gene eQTMs
ENSG00000130175	cg06829293	PRKCSH	chr19	-98.1808	5.08547	2.74e-31	7.12e-30	344856	Negative	protein_coding	-1070	Promoter non-target gene eQTMs
ENSG00000142453	cg06829293	CARM1	chr19	-33.0126	1.81962	2.94e-29	6.07e-28	-218919	Positive	protein_coding	-1070	Promoter non-target gene eQTMs
ENSG00000130734	cg06829293	ATG4D	chr19	-17.1001	1.02764	6.19e-26	9e-25	-546537	Negative	protein_coding	-1070	Promoter non-target gene eQTMs
ENSG00000130159	cg06829293	ECSIT	chr19	-18.9904	1.21287	9.3e-26	1.32e-24	-415497	Negative	protein_coding	-1070	Promoter non-target gene eQTMs
ENSG00000079999	cg06829293	KEAP1	chr19	-23.7896	1.49735	6.25e-24	7.28e-23	604307	Negative	protein_coding	-1070	Promoter non-target gene eQTMs
ENSG00000079805	cg06829293	DNM2	chr19	-31.6998	3.58015	1.92e-10	5.71e-10	-372353	Positive	protein_coding	-1070	Promoter non-target gene eQTMs
ENSG00000105518	cg06829293	TMEM205	chr19	-8.97866	1.07851	1.11e-08	2.82e-08	-252344	Negative	protein_coding	-1070	Promoter non-target gene eQTMs
ENSG00000070444	cg08443019	MNT	chr17	-15.9874	1.86206	5.36e-07	1.16e-06	-341068	Negative	protein_coding	-1069	Promoter non-target gene eQTMs
ENSG00000150551	cg17762933	LYPD1	chr2	1.29184	0.235348	7.81e-05	0.00013689	621182	Positive	protein_coding	-1067	Promoter non-target gene eQTMs
ENSG00000113141	cg06730285	IK	chr5	21.1301	3.43245	0.00013816	0.00023542	81536	Positive	protein_coding	-1066	Promoter non-target gene eQTMs
ENSG00000267549	cg08489315	AC006116.17	chr19	-0.328793	0.0482669	1.44e-05	2.72e-05	672575	Negative	antisense	-1066	Promoter non-target gene eQTMs
ENSG00000103066	cg09721380	PLA2G15	chr16	-2.97607	0.267867	3.14e-15	1.48e-14	-861323	Positive	protein_coding	-1063	Promoter non-target gene eQTMs
ENSG00000153904	cg18635645	DDAH1	chr1	46.0038	3.78238	2.93e-18	1.87e-17	-116373	Positive	protein_coding	-1062	Promoter non-target gene eQTMs
ENSG00000157184	cg23224303	CPT2	chr1	3.99949	0.853979	0.00546002	0.00782387	-694103	Positive	protein_coding	-1061	Promoter non-target gene eQTMs
ENSG00000091542	cg09134682	ALKBH5	chr17	-31.2954	2.82103	3.69e-15	1.73e-14	945899	Negative	protein_coding	-1061	Promoter non-target gene eQTMs
ENSG00000227543	cg17960080	SPAG5-AS1	chr17	-6.22582	0.762455	2.06e-08	5.1e-08	-1060	Negative	processed_transcript	-1060	Promoter-eQTMs
ENSG00000265287	cg17960080	RP11-192H23.6	chr17	-0.623751	0.0987709	2.78e-05	5.09e-05	8113	Negative	antisense	-1060	Promoter non-target gene eQTMs
ENSG00000126226	cg14929266	PCID2	chr13	-15.4177	0.866598	6.32e-28	1.13e-26	32233	Positive	protein_coding	-1057	Promoter-eQTMs
ENSG00000283108	cg11373429	CTC-325H20.8	chr19	-0.564931	0.0678089	9.57e-08	2.23e-07	906494	Negative	processed_transcript	-1056	Promoter non-target gene eQTMs
ENSG00000110074	cg00299052	FOXRED1	chr11	-8.35087	1.8658	0.015554	0.0209746	676290	Negative	protein_coding	-1053	Promoter non-target gene eQTMs
ENSG00000185710	cg10469704	SMG1P4	chr16	-2.4109	0.306868	6.98e-09	1.81e-08	-578383	Negative	transcribed_unprocessed_pseudogene	-1052	Promoter non-target gene eQTMs
ENSG00000174403	cg03038835	C20orf166-AS1	chr20	-2.21305	0.269047	1.16e-06	2.43e-06	635207	Positive	antisense	-1050	Promoter non-target gene eQTMs
ENSG00000166529	cg20629181	ZSCAN21	chr7	2.63361	0.423614	3.68e-05	6.66e-05	-52824	Positive	protein_coding	-1049	Promoter non-target gene eQTMs
ENSG00000183060	cg08568050	LYSMD4	chr15	-5.71332	0.64884	2.31e-10	6.82e-10	-149231	Negative	protein_coding	-1049	Promoter non-target gene eQTMs
ENSG00000136527	cg25449502	TRA2B	chr3	-46.6276	4.16457	1.3e-15	6.37e-15	869692	Positive	protein_coding	-1045	Promoter non-target gene eQTMs
ENSG00000171604	cg24969605	CXXC5	chr5	-48.6912	3.48003	2.4e-20	1.88e-19	-528385	Positive	protein_coding	-1042	Promoter non-target gene eQTMs
ENSG00000155508	cg25421835	CNOT8	chr5	8.57624	0.711882	2.8e-17	1.61e-16	-1039	Negative	protein_coding	-1039	Promoter-eQTMs
ENSG00000155506	cg25421835	LARP1	chr5	-18.6073	2.08269	9.16e-12	3.08e-11	-145749	Positive	protein_coding	-1039	Promoter non-target gene eQTMs
ENSG00000130037	cg13781134	KCNA5	chr12	6.32792	0.419325	1.92e-23	2.11e-22	438009	Negative	protein_coding	-1036	Promoter non-target gene eQTMs
ENSG00000148541	cg09039206	FAM13C	chr10	-1.37297	0.201371	2.93e-06	5.9e-06	-977161	Positive	protein_coding	-1034	Promoter non-target gene eQTMs
ENSG00000109103	cg22465736	UNC119	chr17	-607.443	130.759	0.00868093	0.0121114	53116	Negative	protein_coding	-1033	Promoter non-target gene eQTMs
ENSG00000150893	cg01112805	FREM2	chr13	4.37298	0.796929	0.00043387	0.00070474	-1084	Positive	protein_coding	-1032	Promoter-eQTMs
ENSG00000244270	cg14131985	RPL32P29	chr14	0.458619	0.0970624	0.0155923	0.021023	191248	Positive	processed_pseudogene	-1032	Promoter non-target gene eQTMs
ENSG00000267665	cg02807192	RP11-13K12.2	chr17	-4.78798	0.887768	0.00660658	0.00936074	-11142	Negative	lincRNA	-1031	Promoter-eQTMs
ENSG00000083097	cg02974320	DOPEY1	chr6	-52.8459	3.16666	2.59e-30	6.05e-29	703429	Negative	protein_coding	-1031	Promoter non-target gene eQTMs
ENSG00000230573	cg02899903	RP11-464C19.2	chr10	0.60045	0.0670766	2.56e-10	7.52e-10	660079	Positive	lincRNA	-1030	Promoter non-target gene eQTMs
ENSG00000259065	cg05396132	RP5-1021I20.1	chr14	1.53108	0.336866	0.0145834	0.0197399	-163601	Positive	antisense	-1030	Promoter non-target gene eQTMs
ENSG00000258890	cg18349516	CEP95	chr17	-22.8054	1.66297	3.76e-21	3.2e-20	-752	Positive	protein_coding	-1029	Promoter-eQTMs
ENSG00000266820	cg18349516	RP13-104F24.1	chr17	-1.83611	0.106765	4.88e-30	1.1e-28	-242301	Negative	transcribed_unprocessed_pseudogene	-1029	Promoter non-target gene eQTMs
ENSG00000214174	cg18349516	AMZ2P1	chr17	-3.99235	0.326538	7.48e-19	5.04e-18	-458933	Negative	transcribed_unprocessed_pseudogene	-1029	Promoter non-target gene eQTMs
ENSG00000116473	cg21583850	RAP1A	chr1	-14.603	2.51465	0.00016857	0.00028498	-447962	Negative	protein_coding	-1025	Promoter non-target gene eQTMs
ENSG00000116489	cg21583850	CAPZA1	chr1	-13.8271	2.45093	0.00023418	0.00039049	629625	Positive	protein_coding	-1025	Promoter non-target gene eQTMs
ENSG00000261019	cg17045801	RP11-111K18.2	chr7	-0.429534	0.081521	0.00032498	0.00053428	212352	Negative	lincRNA	-1025	Promoter non-target gene eQTMs
ENSG00000139132	cg16649695	FGD4	chr12	36.7839	4.87791	3.3e-08	8.02e-08	808581	Positive	protein_coding	-1025	Promoter non-target gene eQTMs
ENSG00000139160	cg16649695	ETFBKMT	chr12	1.48675	0.285949	0.00051158	0.00082423	56212	Negative	protein_coding	-1025	Promoter non-target gene eQTMs
ENSG00000187244	cg16632661	BCAM	chr19	-16.9023	1.10137	1.08e-18	7.17e-18	60330	Positive	protein_coding	-1024	Promoter non-target gene eQTMs
ENSG00000278917	cg16632661	RP11-15A1.4	chr19	0.805743	0.0819567	3.19e-12	1.12e-11	-857496	Positive	TEC	-1024	Promoter non-target gene eQTMs
ENSG00000132470	cg07925900	ITGB4	chr17	42.6348	4.24063	2.37e-07	5.31e-07	-837376	Positive	protein_coding	-1021	Promoter non-target gene eQTMs
ENSG00000205643	cg14466896	CDPF1	chr22	1.33119	0.116382	3.59e-15	1.69e-14	-934022	Positive	protein_coding	-1021	Promoter non-target gene eQTMs
ENSG00000127124	cg10200609	HIVEP3	chr1	5.53677	0.358095	1.49e-23	1.66e-22	1177081	Positive	protein_coding	-1019	Promoter non-target gene eQTMs
ENSG00000151466	cg00783759	SCLT1	chr4	1.14877	0.251671	0.00311872	0.00460059	-802635	Positive	protein_coding	-1018	Promoter non-target gene eQTMs
ENSG00000131242	cg21839984	RAB11FIP4	chr17	24.164	2.04107	5.19e-17	2.9e-16	-1128293	Positive	protein_coding	-1015	Promoter non-target gene eQTMs
ENSG00000114859	cg05197962	CLCN2	chr3	-6.75564	0.965583	7.93e-07	1.69e-06	-709609	Negative	protein_coding	-1008	Promoter non-target gene eQTMs
ENSG00000108021	cg08452525	FAM208B	chr10	-18.0112	1.05995	1.37e-28	2.65e-27	-1007	Negative	protein_coding	-1007	Promoter-eQTMs
ENSG00000228175	cg16695835	GEMIN8P4	chr1	0.683195	0.154517	0.00886569	0.0123545	1734	Positive	processed_pseudogene	-1006	Promoter-eQTMs
ENSG00000280157	cg11520395	RP11-520H14.7	chr1	0.865556	0.0929727	9.15e-12	3.08e-11	385109	Positive	TEC	-1003	Promoter non-target gene eQTMs
ENSG00000141542	cg15256944	RAB40B	chr17	-2.09673	0.217825	3.64e-11	1.16e-10	-970644	Negative	protein_coding	-1003	Promoter non-target gene eQTMs
ENSG00000273702	cg12544923	RP11-758H9.2	chr17	-1.35259	0.250939	0.00014677	0.0002492	-925496	Negative	lincRNA	-1002	Promoter non-target gene eQTMs
ENSG00000197375	cg07691761	SLC22A5	chr5	-5.68383	0.319818	1.2e-30	2.92e-29	-187267	Positive	protein_coding	-1000	Promoter non-target gene eQTMs
ENSG00000158987	cg07691761	RAPGEF6	chr5	-13.5436	0.853015	1.58e-26	2.45e-25	1133098	Negative	protein_coding	-1000	Promoter non-target gene eQTMs
ENSG00000164406	cg07691761	LEAP2	chr5	-1.78646	0.157749	1.59e-15	7.71e-15	315303	Positive	protein_coding	-1000	Promoter non-target gene eQTMs
ENSG00000164404	cg07691761	GDF9	chr5	-0.597187	0.0625419	1.22e-10	3.69e-10	-304162	Positive	protein_coding	-1000	Promoter non-target gene eQTMs
ENSG00000203883	cg12626292	SOX18	chr20	-0.731141	0.0630006	3.6e-08	8.72e-08	-182291	Negative	protein_coding	-998	Promoter non-target gene eQTMs
ENSG00000184702	cg19974128	SEPTIN5	chr22	39.3587	3.10227	2.66e-18	1.71e-17	591976	Positive	protein_coding	-998	Promoter non-target gene eQTMs
ENSG00000160299	cg02395981	PCNT	chr21	-11.6336	0.721246	1.04e-25	1.47e-24	-971	Positive	protein_coding	-990	Promoter-eQTMs
ENSG00000120526	cg09673860	NUDCD1	chr8	-2.90245	0.35505	1.98e-09	5.39e-09	734013	Negative	protein_coding	-989	Promoter non-target gene eQTMs
ENSG00000243742	cg06070311	RPLP0P2	chr11	3.81401	0.155356	2.96e-44	4.69e-42	689584	Positive	transcribed_processed_pseudogene	-989	Promoter non-target gene eQTMs
ENSG00000108852	cg15109179	MPP2	chr17	13.9223	1.09058	9.37e-18	5.7e-17	-704292	Negative	protein_coding	-988	Promoter non-target gene eQTMs
ENSG00000277511	cg22322863	CTD-2095E4.5	chr17	0.203668	0.0343427	0.00010272	0.00017768	-360012	Positive	lincRNA	-988	Promoter non-target gene eQTMs
ENSG00000259033	cg12858895	RP11-718G2.5	chr14	0.347522	0.0363009	1.95e-08	4.84e-08	67522	Positive	lincRNA	-984	Promoter non-target gene eQTMs
ENSG00000248445	cg11247562	SEMA6A-AS1	chr5	-0.681291	0.0812256	4.37e-10	1.26e-09	-127918	Negative	antisense	-983	Promoter non-target gene eQTMs
ENSG00000186352	cg01826897	ANKRD37	chr4	97.5245	13.2977	6.73e-07	1.44e-06	185536	Positive	protein_coding	-981	Promoter non-target gene eQTMs
ENSG00000147419	cg09473948	CCDC25	chr8	9.70445	1.66446	5.32e-05	9.47e-05	40315	Positive	protein_coding	-978	Promoter-eQTMs
ENSG00000123989	cg07867558	CHPF	chr2	38.4491	2.45736	3.02e-22	2.91e-21	-879206	Positive	protein_coding	-978	Promoter non-target gene eQTMs
ENSG00000150764	cg21060796	DIXDC1	chr11	25.6582	2.64775	3.13e-11	9.99e-11	385890	Positive	protein_coding	-974	Promoter non-target gene eQTMs
ENSG00000066084	cg05964952	DIP2B	chr12	42.7139	3.24096	6.02e-19	4.09e-18	-734281	Positive	protein_coding	-974	Promoter non-target gene eQTMs
ENSG00000163946	cg26107590	FAM208A	chr3	15.9606	2.53423	1.14e-05	2.17e-05	607358	Negative	protein_coding	-970	Promoter non-target gene eQTMs
ENSG00000225880	cg05378358	LINC00115	chr1	0.59173	0.137504	0.0306489	0.0397472	499454	Positive	lincRNA	-969	Promoter non-target gene eQTMs
ENSG00000213553	cg04395688	RPLP0P6	chr2	1.06088	0.158099	2.54e-06	5.15e-06	-955755	Positive	processed_pseudogene	-969	Promoter non-target gene eQTMs
ENSG00000066739	cg18530766	ATG2B	chr14	36.3454	2.29395	2.66e-26	4.01e-25	223205	Positive	protein_coding	-967	Promoter non-target gene eQTMs
ENSG00000100744	cg18530766	GSKIP	chr14	28.4447	3.07545	4.26e-11	1.34e-10	-138948	Negative	protein_coding	-967	Promoter non-target gene eQTMs
ENSG00000182512	cg18530766	GLRX5	chr14	2.54593	0.284855	4.24e-10	1.22e-09	-968897	Positive	protein_coding	-967	Promoter non-target gene eQTMs
ENSG00000271918	cg09941833	CTD-2287O16.5	chr5	0.802884	0.16288	0.0018312	0.0027785	-265889	Positive	antisense	-964	Promoter non-target gene eQTMs
ENSG00000159840	cg01171849	ZYX	chr7	-18.6983	2.00052	2.02e-10	5.99e-10	92951	Positive	protein_coding	-964	Promoter non-target gene eQTMs
ENSG00000164647	cg03952568	STEAP1	chr7	-0.4084	0.0843812	0.00411214	0.0059807	-249940	Negative	protein_coding	-962	Promoter non-target gene eQTMs
ENSG00000236824	cg12448545	BCYRN1	chr2	-3.02289	0.229366	8.56e-19	5.75e-18	-571324	Positive	scRNA	-961	Promoter non-target gene eQTMs
ENSG00000257511	cg10246141	RP11-278C7.1	chr12	-0.476498	0.0770186	1.49e-05	2.81e-05	30479	Negative	processed_pseudogene	-960	Promoter non-target gene eQTMs
ENSG00000081059	cg05863116	TCF7	chr5	-4.47124	0.613574	8.99e-06	1.73e-05	-112035	Negative	protein_coding	-959	Promoter non-target gene eQTMs
ENSG00000163935	cg19902797	SFMBT1	chr3	4.37107	0.505517	5.21e-10	1.49e-09	-928598	Positive	protein_coding	-958	Promoter non-target gene eQTMs
ENSG00000088387	cg11782830	DOCK9	chr13	-21.9662	1.09774	3.92e-37	2.26e-35	708581	Negative	protein_coding	-958	Promoter non-target gene eQTMs
ENSG00000163931	cg09307279	TKT	chr3	-17.8797	2.00668	1.2e-10	3.64e-10	-518801	Negative	protein_coding	-956	Promoter non-target gene eQTMs
ENSG00000137513	cg06022507	NARS2	chr11	4.76726	0.401335	1.24e-16	6.69e-16	-845623	Positive	protein_coding	-954	Promoter non-target gene eQTMs
ENSG00000149260	cg06022507	CAPN5	chr11	-10.349	1.11415	3.51e-09	9.35e-09	-523384	Positive	protein_coding	-954	Promoter non-target gene eQTMs
ENSG00000159063	cg06022507	ALG8	chr11	2.19318	0.375418	0.00011674	0.00020059	-510591	Positive	protein_coding	-954	Promoter non-target gene eQTMs
ENSG00000048649	cg06022507	RSF1	chr11	11.8542	2.16579	0.00041202	0.00067116	-69651	Positive	protein_coding	-954	Promoter non-target gene eQTMs
ENSG00000198586	cg04863950	TLK1	chr2	34.5581	5.04943	1.38e-05	2.61e-05	532376	Positive	protein_coding	-952	Promoter non-target gene eQTMs
ENSG00000164692	cg11562309	COL1A2	chr7	18.3022	3.43611	0.0100519	0.0139093	-262600	Positive	protein_coding	-952	Promoter non-target gene eQTMs
ENSG00000143977	cg17064663	SNRPG	chr2	-5.53893	0.399727	1.08e-20	8.81e-20	849828	Negative	protein_coding	-951	Promoter non-target gene eQTMs
ENSG00000075292	cg17064663	ZNF638	chr2	-36.0353	2.95841	8.1e-16	4.04e-15	145371	Negative	protein_coding	-951	Promoter non-target gene eQTMs
ENSG00000124507	cg11734749	PACSIN1	chr6	-161.029	13.909	3.3e-16	1.71e-15	216549	Positive	protein_coding	-944	Promoter non-target gene eQTMs
ENSG00000124587	cg03727227	PEX6	chr6	12.9539	2.04659	1.43e-05	2.7e-05	208378	Positive	protein_coding	-944	Promoter non-target gene eQTMs
ENSG00000064999	cg11734749	ANKS1A	chr6	-16.3331	3.40501	0.00369108	0.00539555	639743	Positive	protein_coding	-944	Promoter non-target gene eQTMs
ENSG00000154642	cg05169244	C21orf91	chr21	3.79298	0.647144	3.73e-05	6.75e-05	-275648	Positive	protein_coding	-944	Promoter non-target gene eQTMs
ENSG00000048342	cg16092991	CC2D2A	chr4	-56.3166	4.95709	7.14e-18	4.39e-17	466878	Negative	protein_coding	-942	Promoter non-target gene eQTMs
ENSG00000170837	cg04087740	GPR27	chr3	2.15859	0.459757	0.0362506	0.0465515	-941	Positive	protein_coding	-941	Promoter-eQTMs
ENSG00000229589	cg20180092	ACVR2B-AS1	chr3	0.388321	0.0935838	0.0360344	0.0462976	933262	Positive	antisense	-941	Promoter non-target gene eQTMs
ENSG00000085514	cg07160278	PILRA	chr7	5.09873	0.90732	0.00151875	0.00232408	-62201	Positive	protein_coding	-941	Promoter non-target gene eQTMs
ENSG00000214530	cg07667522	STARD10	chr11	4.07045	0.411661	1.54e-11	5.07e-11	-530087	Positive	protein_coding	-941	Promoter non-target gene eQTMs
ENSG00000063015	cg19154303	SEZ6	chr17	-76.1269	5.5659	1.72e-19	1.24e-18	975240	Negative	protein_coding	-941	Promoter non-target gene eQTMs
ENSG00000108582	cg19154303	CPD	chr17	49.423	5.24286	1.54e-10	4.62e-10	448786	Positive	protein_coding	-941	Promoter non-target gene eQTMs
ENSG00000250462	cg19154303	LRRC37BP1	chr17	39.6099	4.8726	3.39e-09	9.05e-09	699539	Positive	transcribed_unprocessed_pseudogene	-941	Promoter non-target gene eQTMs
ENSG00000275185	cg19154303	RP13-753N3.3	chr17	0.431706	0.069143	1.04e-05	1.99e-05	968969	Positive	antisense	-941	Promoter non-target gene eQTMs
ENSG00000174227	cg26057380	PIGG	chr4	6.54163	0.539894	6.94e-17	3.84e-16	-175310	Positive	protein_coding	-940	Promoter non-target gene eQTMs
ENSG00000020426	cg20995913	MNAT1	chr14	-11.5861	1.25405	1.35e-11	4.47e-11	-961711	Negative	protein_coding	-940	Promoter non-target gene eQTMs
ENSG00000139974	cg20995913	SLC38A6	chr14	-16.6108	1.82644	2.47e-11	7.98e-11	-715339	Negative	protein_coding	-940	Promoter non-target gene eQTMs
ENSG00000242294	cg21679810	STAG3L5P	chr7	16.5084	2.25225	2.81e-07	6.25e-07	-93650	Positive	transcribed_unprocessed_pseudogene	-939	Promoter non-target gene eQTMs
ENSG00000139679	cg01225827	LPAR6	chr13	-7.12551	1.29119	0.00086063	0.00135146	587284	Negative	protein_coding	-939	Promoter non-target gene eQTMs
ENSG00000162444	cg13374225	RBP7	chr1	-0.923489	0.107252	1.53e-08	3.83e-08	-36560	Negative	protein_coding	-934	Promoter non-target gene eQTMs
ENSG00000176769	cg25041901	TCERG1L	chr10	3.60702	0.391067	4.38e-11	1.38e-10	1094505	Negative	protein_coding	-934	Promoter non-target gene eQTMs
ENSG00000197177	cg25041901	ADGRA1	chr10	1.44948	0.158613	7.67e-10	2.16e-09	884033	Positive	protein_coding	-934	Promoter non-target gene eQTMs
ENSG00000168243	cg12009109	GNG4	chr1	7.50158	0.859341	9.71e-09	2.48e-08	-219405	Negative	protein_coding	-930	Promoter non-target gene eQTMs
ENSG00000099381	cg06170266	SETD1A	chr16	11.4159	0.503679	3.88e-39	2.87e-37	-916934	Negative	protein_coding	-930	Promoter non-target gene eQTMs
ENSG00000167395	cg06170266	ZNF646	chr16	4.04249	0.288893	5.96e-21	4.98e-20	-800266	Positive	protein_coding	-930	Promoter non-target gene eQTMs
ENSG00000144228	cg10532188	SPOPL	chr2	-8.9132	0.916157	3.27e-13	1.27e-12	-928	Positive	protein_coding	-928	Promoter-eQTMs
ENSG00000164944	cg11753193	KIAA1429	chr8	16.4875	1.60374	5.28e-14	2.21e-13	-746640	Negative	protein_coding	-928	Promoter non-target gene eQTMs
ENSG00000185158	cg05860390	LRRC37B	chr17	-2.92262	0.454001	1.8e-06	3.7e-06	-869815	Negative	protein_coding	-928	Promoter non-target gene eQTMs
ENSG00000177917	cg10911952	ARL6IP6	chr2	10.2463	1.35672	1.18e-07	2.72e-07	618638	Positive	protein_coding	-927	Promoter non-target gene eQTMs
ENSG00000213689	cg20628344	TREX1	chr3	-2.06933	0.174528	4.26e-15	1.98e-14	-947320	Negative	protein_coding	-925	Promoter non-target gene eQTMs
ENSG00000128309	cg25245266	MPST	chr22	-3.62485	0.37192	2.7e-11	8.68e-11	-933894	Positive	protein_coding	-922	Promoter non-target gene eQTMs
ENSG00000197603	cg25010361	C5orf42	chr5	-11.794	0.909974	8.33e-21	6.86e-20	-498953	Negative	protein_coding	-920	Promoter non-target gene eQTMs
ENSG00000279400	cg25010361	CTD-2353F22.2	chr5	-2.27337	0.281568	3.57e-08	8.65e-08	60442	Negative	TEC	-920	Promoter non-target gene eQTMs
ENSG00000152620	cg25010361	NADK2	chr5	-3.86246	0.544377	1.72e-07	3.91e-07	414686	Negative	protein_coding	-920	Promoter non-target gene eQTMs
ENSG00000134243	cg11857025	SORT1	chr1	-36.3683	4.34766	1.89e-09	5.16e-09	-218846	Positive	protein_coding	-919	Promoter non-target gene eQTMs
ENSG00000137168	cg09065504	PPIL1	chr6	4.94211	0.866353	0.00015252	0.00025861	-826233	Positive	protein_coding	-917	Promoter non-target gene eQTMs
ENSG00000227627	cg00220769	RP1-101K10.6	chr6	-1.71361	0.260865	1.91e-06	3.92e-06	-916	Negative	antisense	-916	Promoter-eQTMs
ENSG00000134574	cg14256396	DDB2	chr11	-5.85299	1.3407	0.0365581	0.046919	975167	Negative	protein_coding	-916	Promoter non-target gene eQTMs
ENSG00000114631	cg02980693	PODXL2	chr3	32.5309	1.92574	4.56e-27	7.51e-26	-860942	Positive	protein_coding	-915	Promoter non-target gene eQTMs
ENSG00000058262	cg02980693	SEC61A1	chr3	19.287	2.02659	1.5e-11	4.95e-11	-438486	Positive	protein_coding	-915	Promoter non-target gene eQTMs
ENSG00000123268	cg17395266	ATF1	chr12	5.17837	0.703164	1.02e-07	2.37e-07	-475496	Positive	protein_coding	-914	Promoter non-target gene eQTMs
ENSG00000234595	cg04531425	AC013733.3	chr2	-2.55217	0.421329	0.00882522	0.012302	224999	Negative	antisense	-912	Promoter non-target gene eQTMs
ENSG00000033867	cg12987984	SLC4A7	chr3	-133.548	14.0048	5.96e-13	2.25e-12	-749119	Negative	protein_coding	-912	Promoter non-target gene eQTMs
ENSG00000133302	cg03977394	SLF1	chr5	-1.94496	0.185325	4.07e-15	1.9e-14	-937250	Negative	protein_coding	-912	Promoter non-target gene eQTMs
ENSG00000055163	cg27117005	CYFIP2	chr5	19.1768	2.76461	3.76e-07	8.26e-07	-478528	Negative	protein_coding	-912	Promoter non-target gene eQTMs
ENSG00000107263	cg14373579	RAPGEF1	chr9	27.7443	2.87413	1.55e-10	4.65e-10	-996893	Positive	protein_coding	-912	Promoter non-target gene eQTMs
ENSG00000080845	cg19837275	DLGAP4	chr20	32.0717	1.67787	5.12e-30	1.15e-28	-1221636	Positive	protein_coding	-912	Promoter non-target gene eQTMs
ENSG00000170471	cg19837275	RALGAPB	chr20	-23.203	1.71145	3.63e-21	3.1e-20	944844	Negative	protein_coding	-912	Promoter non-target gene eQTMs
ENSG00000255346	cg13757194	NOX5	chr15	-2.13437	0.178548	7.84e-13	2.93e-12	-910	Negative	protein_coding	-910	Promoter-eQTMs
ENSG00000065308	cg12997953	TRAM2	chr6	-2.69925	0.182016	6.45e-24	7.49e-23	-135077	Positive	protein_coding	-910	Promoter non-target gene eQTMs
ENSG00000148248	cg08609308	SURF4	chr9	42.6565	4.22074	4.16e-13	1.59e-12	-482514	Positive	protein_coding	-909	Promoter non-target gene eQTMs
ENSG00000111361	cg23312248	EIF2B1	chr12	-2.9504	0.303421	5.83e-11	1.82e-10	-639438	Negative	protein_coding	-908	Promoter non-target gene eQTMs
ENSG00000140015	cg18771300	KCNH5	chr14	-5.78789	1.41349	0.0254406	0.0333813	505555	Negative	protein_coding	-905	Promoter non-target gene eQTMs
ENSG00000155393	cg20939803	HEATR3	chr16	-2.88375	0.54056	0.00049739	0.0008025	-303515	Negative	protein_coding	-905	Promoter non-target gene eQTMs
ENSG00000103429	cg02323652	BFAR	chr16	8.99873	0.640189	8.92e-23	9.07e-22	330640	Positive	protein_coding	-902	Promoter non-target gene eQTMs
ENSG00000124279	cg00500145	FASTKD3	chr5	-2.31147	0.184458	7.14e-20	5.36e-19	10779	Negative	protein_coding	-901	Promoter-eQTMs
ENSG00000180304	cg06130371	OAZ2	chr15	40.9263	4.88372	3.86e-09	1.02e-08	598919	Positive	protein_coding	-901	Promoter non-target gene eQTMs
ENSG00000269473	cg14386312	CTD-2619J13.19	chr19	-2.05178	0.217416	5.79e-11	1.81e-10	210953	Negative	lincRNA	-901	Promoter non-target gene eQTMs
ENSG00000188785	cg14386312	ZNF548	chr19	-3.6265	0.574519	4.21e-05	7.57e-05	-839645	Negative	protein_coding	-901	Promoter non-target gene eQTMs
ENSG00000268516	cg14386312	CTD-3138B18.5	chr19	-0.306157	0.0667866	0.00912787	0.0126916	-27775	Negative	antisense	-901	Promoter non-target gene eQTMs
ENSG00000140320	cg23228048	BAHD1	chr15	4.31503	0.462794	8.85e-12	2.98e-11	-900	Positive	protein_coding	-900	Promoter-eQTMs
ENSG00000121879	cg03912024	PIK3CA	chr3	61.7851	8.22887	7.59e-08	1.78e-07	-505540	Positive	protein_coding	-899	Promoter non-target gene eQTMs
ENSG00000137161	cg23845951	CNPY3	chr6	7.31519	0.484179	1e-22	1.01e-21	-243005	Negative	protein_coding	-898	Promoter non-target gene eQTMs
ENSG00000179869	cg22825780	ABCA13	chr7	-2.10765	0.293754	1.27e-06	2.65e-06	135051	Negative	protein_coding	-896	Promoter non-target gene eQTMs
ENSG00000274180	cg20910875	NATD1	chr17	4.04919	0.638387	2.31e-06	4.7e-06	138223	Positive	protein_coding	-896	Promoter non-target gene eQTMs
ENSG00000180329	cg09919412	CCDC43	chr17	-5.61232	1.18156	0.0036026	0.00527367	476297	Negative	protein_coding	-896	Promoter non-target gene eQTMs
ENSG00000228288	cg16055091	PCAT6	chr1	-2.82481	0.515067	0.00130304	0.00200603	799707	Positive	antisense	-894	Promoter non-target gene eQTMs
ENSG00000187416	cg10386016	LHFPL3	chr7	-14.1827	1.70165	5.16e-10	1.48e-09	338290	Negative	protein_coding	-894	Promoter non-target gene eQTMs
ENSG00000164815	cg10386016	ORC5	chr7	-9.87841	1.20018	2.01e-09	5.47e-09	-135931	Negative	protein_coding	-894	Promoter non-target gene eQTMs
ENSG00000279529	cg07029707	CTD-3222D19.8	chr19	-1.1413	0.102364	5.47e-15	2.51e-14	-88385	Negative	antisense	-894	Promoter non-target gene eQTMs
ENSG00000171723	cg01190876	GPHN	chr14	-7.48932	0.991376	9.74e-09	2.48e-08	-853481	Negative	protein_coding	-891	Promoter non-target gene eQTMs
ENSG00000168615	cg19077071	ADAM9	chr8	15.584	1.48013	2.99e-14	1.28e-13	609772	Positive	protein_coding	-890	Promoter non-target gene eQTMs
ENSG00000111432	cg01568919	FZD10	chr12	1.02148	0.161462	0.00109849	0.00170728	-886	Positive	protein_coding	-886	Promoter-eQTMs
ENSG00000165689	cg18576861	SDCCAG3	chr9	2.52616	0.544423	0.0154914	0.0208949	768234	Positive	protein_coding	-886	Promoter non-target gene eQTMs
ENSG00000127220	cg14560835	ABHD8	chr19	-17.6395	0.758075	6.46e-40	5.28e-38	-631130	Negative	protein_coding	-886	Promoter non-target gene eQTMs
ENSG00000127528	cg14560835	KLF2	chr19	-1.89517	0.175997	5.19e-11	1.63e-10	-336184	Positive	protein_coding	-886	Promoter non-target gene eQTMs
ENSG00000271851	cg12869623	RP11-565F19.2	chr17	0.546616	0.091127	3.31e-05	6.02e-05	92258	Positive	sense_intronic	-883	Promoter non-target gene eQTMs
ENSG00000158270	cg01848352	COLEC12	chr18	25.225	4.08382	3.86e-05	6.97e-05	-157472	Positive	protein_coding	-882	Promoter non-target gene eQTMs
ENSG00000239213	cg15507776	NCK1-AS1	chr3	0.50711	0.104548	0.00129391	0.00199285	-15818	Positive	antisense	-880	Promoter non-target gene eQTMs
ENSG00000183780	cg07187135	SLC35F3	chr1	0.865576	0.170729	0.00249208	0.0037215	-1224140	Positive	protein_coding	-879	Promoter non-target gene eQTMs
ENSG00000167005	cg18563571	NUDT21	chr16	-17.6686	2.30646	8.99e-08	2.1e-07	-237160	Positive	protein_coding	-879	Promoter non-target gene eQTMs
ENSG00000112339	cg03472949	HBS1L	chr6	-13.6772	1.38226	2.3e-12	8.18e-12	221814	Negative	protein_coding	-877	Promoter non-target gene eQTMs
ENSG00000154065	cg18519927	ANKRD29	chr18	7.59701	1.24082	2.28e-05	4.21e-05	-463486	Positive	protein_coding	-876	Promoter non-target gene eQTMs
ENSG00000188868	cg03402132	ZNF563	chr19	-0.600604	0.108478	0.00080227	0.00126524	-881318	Negative	protein_coding	-871	Promoter non-target gene eQTMs
ENSG00000196781	cg20373761	TLE1	chr9	13.3116	1.10229	1.25e-18	8.26e-18	106489	Negative	protein_coding	-867	Promoter-eQTMs
ENSG00000272812	cg01049176	RP5-855D21.3	chr8	-0.562162	0.0450521	7.92e-18	4.85e-17	-174173	Positive	sense_intronic	-864	Promoter non-target gene eQTMs
ENSG00000180190	cg01049176	TDRP	chr8	-4.74226	0.425004	4.93e-15	2.28e-14	-82500	Positive	protein_coding	-864	Promoter non-target gene eQTMs
ENSG00000172748	cg01049176	ZNF596	chr8	-3.47965	0.334581	1.08e-13	4.36e-13	-175155	Positive	protein_coding	-864	Promoter non-target gene eQTMs
ENSG00000138780	cg05923996	GSTCD	chr4	-3.13586	0.232211	2.71e-20	2.12e-19	-607627	Negative	protein_coding	-861	Promoter non-target gene eQTMs
ENSG00000138785	cg05923996	INTS12	chr4	-2.67303	0.21959	4.38e-19	3.03e-18	633778	Negative	protein_coding	-861	Promoter non-target gene eQTMs
ENSG00000136643	cg22489498	RPS6KC1	chr1	-4.78386	0.469645	6.34e-13	2.39e-12	-938135	Positive	protein_coding	-860	Promoter non-target gene eQTMs
ENSG00000169371	cg16149030	SNUPN	chr15	-1.35216	0.109369	3.48e-18	2.2e-17	-229070	Negative	protein_coding	-858	Promoter non-target gene eQTMs
ENSG00000123999	cg25224376	INHA	chr2	-3.26726	0.458464	4.36e-05	7.82e-05	909541	Negative	protein_coding	-857	Promoter non-target gene eQTMs
ENSG00000141934	cg14319773	PLPP2	chr19	-11.5349	2.0539	0.00042343	0.00068886	11320	Negative	protein_coding	-856	Promoter-eQTMs
ENSG00000020129	cg18881764	NCDN	chr1	25.6099	1.95214	2.53e-20	1.99e-19	-853	Positive	protein_coding	-853	Promoter-eQTMs
ENSG00000116544	cg18881764	DLGAP3	chr1	7.11778	0.315578	1.8e-41	1.78e-39	692890	Positive	protein_coding	-853	Promoter non-target gene eQTMs
ENSG00000116871	cg18881764	MAP7D1	chr1	28.9852	1.44083	1.82e-35	8.44e-34	597253	Negative	protein_coding	-853	Promoter non-target gene eQTMs
ENSG00000134698	cg18881764	AGO4	chr1	-20.4192	1.62034	9.89e-20	7.33e-19	249690	Negative	protein_coding	-853	Promoter non-target gene eQTMs
ENSG00000142694	cg18881764	EVA1B	chr1	0.475599	0.0362333	4.52e-14	1.9e-13	-763705	Positive	protein_coding	-853	Promoter non-target gene eQTMs
ENSG00000197056	cg18881764	ZMYM1	chr1	-3.07641	0.296926	6.56e-14	2.71e-13	-526154	Positive	protein_coding	-853	Promoter non-target gene eQTMs
ENSG00000126070	cg18881764	AGO3	chr1	-11.1857	1.17411	1.23e-11	4.09e-11	372392	Negative	protein_coding	-853	Promoter non-target gene eQTMs
ENSG00000163867	cg18881764	ZMYM6	chr1	-6.54978	0.838833	1.67e-08	4.17e-08	572161	Negative	protein_coding	-853	Promoter non-target gene eQTMs
ENSG00000128564	cg08527265	VGF	chr7	-17.2418	0.87137	3.45e-32	9.96e-31	-726399	Negative	protein_coding	-853	Promoter non-target gene eQTMs
ENSG00000279048	cg06049192	RP11-511H23.2	chr7	-1.22755	0.122175	1.65e-13	6.56e-13	-851	Negative	TEC	-851	Promoter-eQTMs
ENSG00000229727	cg14595557	AC013460.1	chr2	0.413513	0.0967151	0.0266633	0.0349082	516572	Positive	processed_transcript	-849	Promoter non-target gene eQTMs
ENSG00000269736	cg09764440	CTD-2521M24.11	chr19	-23.6415	4.85216	0.00418177	0.00607444	700329	Negative	lincRNA	-849	Promoter non-target gene eQTMs
ENSG00000115128	cg24967852	SF3B6	chr2	6.84606	0.548075	5.1e-19	3.49e-18	904652	Positive	protein_coding	-848	Promoter non-target gene eQTMs
ENSG00000237399	cg23782734	PITRM1-AS1	chr10	-1.33182	0.249565	0.00214201	0.00322365	74783	Negative	antisense	-848	Promoter non-target gene eQTMs
ENSG00000162928	cg12345955	PEX13	chr2	-5.52373	1.38183	0.0390151	0.0498865	462814	Negative	protein_coding	-844	Promoter non-target gene eQTMs
ENSG00000136854	cg16702144	STXBP1	chr9	-254.426	30.9994	8.98e-09	2.3e-08	-876660	Negative	protein_coding	-844	Promoter non-target gene eQTMs
ENSG00000140506	cg20907384	LMAN1L	chr15	0.326954	0.0423979	4.57e-07	9.97e-07	817251	Positive	protein_coding	-843	Promoter non-target gene eQTMs
ENSG00000134809	cg17687528	TIMM10	chr11	-1.00087	0.231603	0.0137243	0.0186417	69764	Negative	protein_coding	-841	Promoter non-target gene eQTMs
ENSG00000185745	cg05552874	IFIT1	chr10	-3.56654	0.725917	0.00938573	0.0130357	-840	Negative	protein_coding	-840	Promoter-eQTMs
ENSG00000168310	cg19905754	IRF2	chr4	-3.48925	0.704886	0.00229113	0.0034363	1009005	Negative	protein_coding	-835	Promoter non-target gene eQTMs
ENSG00000117448	cg00347280	AKR1A1	chr1	-6.26866	1.0407	4.15e-05	7.47e-05	538381	Negative	protein_coding	-833	Promoter non-target gene eQTMs
ENSG00000107175	cg10743505	CREB3	chr9	4.15777	0.514841	3.82e-09	1.01e-08	742386	Negative	protein_coding	-833	Promoter non-target gene eQTMs
ENSG00000273311	cg00812502	DGCR11	chr22	0.628661	0.0807043	2.51e-08	6.16e-08	76200	Positive	sense_intronic	-833	Promoter non-target gene eQTMs
ENSG00000119844	cg00626599	AFTPH	chr2	22.4519	2.86367	1.01e-08	2.57e-08	682534	Positive	protein_coding	-831	Promoter non-target gene eQTMs
ENSG00000180008	cg15990800	SOCS4	chr14	50.6208	4.93308	1.27e-13	5.09e-13	-244904	Negative	protein_coding	-831	Promoter non-target gene eQTMs
ENSG00000198554	cg15990800	WDHD1	chr14	5.13653	0.589631	2.39e-10	7.05e-10	333185	Negative	protein_coding	-831	Promoter non-target gene eQTMs
ENSG00000197045	cg15990800	GMFB	chr14	38.797	5.63604	3.91e-07	8.58e-07	797650	Positive	protein_coding	-831	Promoter non-target gene eQTMs
ENSG00000280987	cg07627738	MATR3	chr5	-18.5735	1.3238	2.63e-21	2.27e-20	-374377	Negative	protein_coding	-830	Promoter non-target gene eQTMs
ENSG00000182700	cg07627738	IGIP	chr5	-17.5362	1.47138	9.21e-16	4.58e-15	477806	Negative	protein_coding	-830	Promoter non-target gene eQTMs
ENSG00000176087	cg07627738	SLC35A4	chr5	13.171	1.18631	2.19e-14	9.5e-14	916699	Positive	protein_coding	-830	Promoter non-target gene eQTMs
ENSG00000185129	cg07627738	PURA	chr5	-27.9583	3.4408	3.16e-08	7.69e-08	459648	Negative	protein_coding	-830	Promoter non-target gene eQTMs
ENSG00000120727	cg07627738	PAIP2	chr5	-23.5559	3.58937	8.61e-05	0.00015021	-306542	Positive	protein_coding	-830	Promoter non-target gene eQTMs
ENSG00000249637	cg07627738	CTC-329D1.2	chr5	0.279045	0.0460669	9.15e-05	0.00015922	-722762	Positive	antisense	-830	Promoter non-target gene eQTMs
ENSG00000146006	cg07627738	LRRTM2	chr5	-3.52819	0.713241	0.00354384	0.00519588	779208	Positive	protein_coding	-830	Promoter non-target gene eQTMs
ENSG00000015479	cg07627738	MATR3	chr5	-69.3246	14.6174	0.00423876	0.00615569	-354481	Negative	protein_coding	-830	Promoter non-target gene eQTMs
ENSG00000168275	cg06812651	COA6	chr1	-1.99736	0.160826	8.99e-19	6.02e-18	-236897	Negative	protein_coding	-828	Promoter non-target gene eQTMs
ENSG00000173726	cg06812651	TOMM20	chr1	-25.2967	2.91249	2.12e-10	6.28e-10	-498988	Negative	protein_coding	-828	Promoter non-target gene eQTMs
ENSG00000152904	cg06812651	GGPS1	chr1	-5.73741	0.703187	3.37e-09	9e-09	716997	Positive	protein_coding	-828	Promoter non-target gene eQTMs
ENSG00000105939	cg03789433	ZC3HAV1	chr7	7.36618	0.666577	5.12e-13	1.94e-12	296770	Positive	protein_coding	-828	Promoter non-target gene eQTMs
ENSG00000075415	cg12204362	SLC25A3	chr12	55.4008	7.33189	1.03e-08	2.62e-08	77252	Positive	protein_coding	-827	Promoter non-target gene eQTMs
ENSG00000270020	cg06675147	RP11-463O9.9	chr16	0.364304	0.0672932	0.00104665	0.00163075	-10457	Positive	lincRNA	-827	Promoter non-target gene eQTMs
ENSG00000104960	cg22215202	PTOV1	chr19	-78.0188	7.75288	4.25e-13	1.62e-12	32532	Negative	protein_coding	-827	Promoter non-target gene eQTMs
ENSG00000087088	cg22215202	BAX	chr19	-3.85836	0.689044	0.00043591	0.00070778	-863388	Negative	protein_coding	-827	Promoter non-target gene eQTMs
ENSG00000237651	cg15644097	C2orf74	chr2	-4.01036	0.759765	0.00046148	0.00074716	-825	Negative	protein_coding	-825	Promoter-eQTMs
ENSG00000128609	cg21335509	NDUFA5	chr7	-19.9793	2.4006	2.48e-10	7.3e-10	212892	Positive	protein_coding	-822	Promoter non-target gene eQTMs
ENSG00000272686	cg21335509	RP11-390E23.6	chr7	-0.937574	0.139073	5.38e-07	1.16e-06	-821	Positive	antisense	-821	Promoter-eQTMs
ENSG00000135185	cg14644787	TMEM243	chr7	-1.82358	0.191448	2.8e-12	9.89e-12	1024019	Negative	protein_coding	-820	Promoter non-target gene eQTMs
ENSG00000117862	cg05923103	TXNDC12	chr1	-9.79942	0.352306	1.56e-49	6.23e-47	-784220	Positive	protein_coding	-815	Promoter non-target gene eQTMs
ENSG00000106012	cg12030710	IQCE	chr7	-29.7023	3.22888	2.7e-10	7.92e-10	154597	Negative	protein_coding	-815	Promoter non-target gene eQTMs
ENSG00000171798	cg26996236	KNDC1	chr10	8.41654	0.498549	7.64e-28	1.36e-26	-149071	Positive	protein_coding	-815	Promoter non-target gene eQTMs
ENSG00000203772	cg26996236	SPRN	chr10	1.80488	0.108097	8.36e-26	1.2e-24	-111376	Positive	protein_coding	-815	Promoter non-target gene eQTMs
ENSG00000130643	cg26996236	CALY	chr10	11.7307	0.721596	8.79e-25	1.12e-23	-14782	Positive	protein_coding	-815	Promoter non-target gene eQTMs
ENSG00000132207	cg17801467	SLX1A	chr16	-8.2177	0.434937	3.33e-29	6.84e-28	-505137	Negative	protein_coding	-815	Promoter non-target gene eQTMs
ENSG00000103507	cg17801467	BCKDK	chr16	-10.034	0.617101	7.23e-24	8.32e-23	407083	Negative	protein_coding	-815	Promoter non-target gene eQTMs
ENSG00000146247	cg04750775	PHIP	chr6	-35.7355	3.54204	6.42e-14	2.66e-13	144628	Negative	protein_coding	-811	Promoter-eQTMs
ENSG00000279659	cg04750775	RP11-177G23.1	chr6	-2.6428	0.22154	1.17e-17	7.04e-17	494830	Negative	TEC	-811	Promoter non-target gene eQTMs
ENSG00000135338	cg04750775	LCA5	chr6	-8.24333	0.820551	6.52e-14	2.7e-13	-405944	Positive	protein_coding	-811	Promoter non-target gene eQTMs
ENSG00000203812	cg26352401	HIST2H2AA3	chr1	4.64102	0.364389	9.63e-14	3.91e-13	225915	Positive	protein_coding	-810	Promoter non-target gene eQTMs
ENSG00000121900	cg17446216	TMEM54	chr1	-3.13167	0.360914	9.31e-10	2.61e-09	-879956	Negative	protein_coding	-809	Promoter non-target gene eQTMs
ENSG00000080644	cg03711182	CHRNA3	chr15	80.5447	7.48887	2.64e-15	1.25e-14	498530	Negative	protein_coding	-809	Promoter non-target gene eQTMs
ENSG00000122435	cg12469756	TRMT13	chr1	-8.14471	0.735286	1.78e-15	8.59e-15	282258	Negative	protein_coding	-808	Promoter non-target gene eQTMs
ENSG00000122477	cg12469756	LRRC39	chr1	-24.2157	2.54386	1.83e-12	6.58e-12	-297557	Positive	protein_coding	-808	Promoter non-target gene eQTMs
ENSG00000228084	cg12469756	RP5-884G6.2	chr1	-0.235295	0.0287427	4.65e-09	1.22e-08	-117491	Positive	antisense	-808	Promoter non-target gene eQTMs
ENSG00000170419	cg08481578	VSTM2A	chr7	-12.2379	1.52487	3.63e-09	9.66e-09	-823931	Negative	protein_coding	-808	Promoter non-target gene eQTMs
ENSG00000134532	cg22408544	SOX5	chr12	2.15047	0.409149	0.00057025	0.00091377	-903681	Positive	protein_coding	-808	Promoter non-target gene eQTMs
ENSG00000197410	cg07332336	DCHS2	chr4	-2.65784	0.501558	0.00044375	0.00071979	977694	Negative	protein_coding	-807	Promoter non-target gene eQTMs
ENSG00000118922	cg06116962	KLF12	chr13	-9.6417	1.1154	3.18e-11	1.01e-10	-903223	Negative	protein_coding	-807	Promoter non-target gene eQTMs
ENSG00000266074	cg21631606	BAHCC1	chr17	-18.7679	0.733543	3.85e-41	3.68e-39	-582139	Positive	protein_coding	-807	Promoter non-target gene eQTMs
ENSG00000141577	cg21631606	CEP131	chr17	-6.42994	0.261107	1.83e-37	1.1e-35	788021	Positive	protein_coding	-807	Promoter non-target gene eQTMs
ENSG00000157637	cg21631606	SLC38A10	chr17	-14.8383	0.663352	2.07e-36	1.1e-34	732803	Positive	protein_coding	-807	Promoter non-target gene eQTMs
ENSG00000181409	cg21631606	AATK	chr17	-13.3721	0.589268	4.7e-36	2.36e-34	860319	Negative	protein_coding	-807	Promoter non-target gene eQTMs
ENSG00000185504	cg21631606	FAAP100	chr17	-6.64457	0.308501	6.15e-35	2.66e-33	437729	Negative	protein_coding	-807	Promoter non-target gene eQTMs
ENSG00000169683	cg21631606	LRRC45	chr17	-3.14907	0.155998	3.01e-33	1.01e-31	45691	Negative	protein_coding	-807	Promoter non-target gene eQTMs
ENSG00000276101	cg21631606	RP11-455O6.8	chr17	-0.634088	0.0313301	1.08e-30	2.64e-29	-726420	Negative	antisense	-807	Promoter non-target gene eQTMs
ENSG00000169727	cg21631606	GPS1	chr17	-19.036	1.03662	2.03e-30	4.82e-29	73077	Negative	protein_coding	-807	Promoter non-target gene eQTMs
ENSG00000181396	cg21631606	OGFOD3	chr17	-3.8715	0.211827	1.63e-29	3.46e-28	-411596	Negative	protein_coding	-807	Promoter non-target gene eQTMs
ENSG00000169660	cg21631606	HEXDC	chr17	-6.58199	0.395233	5.91e-28	1.06e-26	440704	Negative	protein_coding	-807	Promoter non-target gene eQTMs
ENSG00000185298	cg21631606	CCDC137	chr17	-2.25915	0.130708	4.83e-26	7.06e-25	-310877	Positive	protein_coding	-807	Promoter non-target gene eQTMs
ENSG00000225663	cg21631606	MCRIP1	chr17	-14.5314	0.849335	2.06e-25	2.81e-24	155253	Positive	protein_coding	-807	Promoter non-target gene eQTMs
ENSG00000262814	cg21631606	MRPL12	chr17	-3.13716	0.199345	2.06e-22	2.02e-21	-274247	Negative	protein_coding	-807	Promoter non-target gene eQTMs
ENSG00000169750	cg21631606	RAC3	chr17	-1.43932	0.0979324	2.44e-20	1.92e-19	54064	Negative	protein_coding	-807	Promoter non-target gene eQTMs
ENSG00000265688	cg21631606	MAFG-AS1	chr17	-0.671738	0.0458809	6.56e-20	4.94e-19	-49785	Positive	antisense	-807	Promoter non-target gene eQTMs
ENSG00000185813	cg21631606	PCYT2	chr17	-4.89375	0.361422	1.47e-18	9.64e-18	76649	Negative	protein_coding	-807	Promoter non-target gene eQTMs
ENSG00000141556	cg21631606	TBCD	chr17	-8.373	0.695438	4.06e-18	2.55e-17	774451	Negative	protein_coding	-807	Promoter non-target gene eQTMs
ENSG00000069424	cg25225169	KCNAB2	chr1	32.7073	2.35684	1.87e-20	1.49e-19	-1345	Positive	protein_coding	-806	Promoter-eQTMs
ENSG00000158292	cg25225169	GPR153	chr1	11.854	0.742656	1.9e-22	1.87e-21	-255081	Positive	protein_coding	-806	Promoter non-target gene eQTMs
ENSG00000221944	cg25506396	TIGD1	chr2	-6.25709	0.39706	2.36e-24	2.87e-23	806251	Positive	protein_coding	-805	Promoter non-target gene eQTMs
ENSG00000135930	cg25506396	EIF4E2	chr2	-8.20691	0.586434	2.48e-22	2.41e-21	-803547	Positive	protein_coding	-805	Promoter non-target gene eQTMs
ENSG00000085978	cg25506396	ATG16L1	chr2	-5.22716	0.473858	6.87e-15	3.12e-14	-144170	Positive	protein_coding	-805	Promoter non-target gene eQTMs
ENSG00000111837	cg05446010	MAK	chr6	112.482	10.9866	2.85e-14	1.22e-13	281602	Positive	protein_coding	-801	Promoter non-target gene eQTMs
ENSG00000100532	cg24753200	CGRRF1	chr14	-7.29561	0.579937	4.77e-19	3.28e-18	-58086	Negative	protein_coding	-801	Promoter non-target gene eQTMs
ENSG00000183580	cg16023551	FBXL7	chr5	-5.55213	0.809368	2.39e-06	4.86e-06	-1116545	Negative	protein_coding	-799	Promoter non-target gene eQTMs
ENSG00000175701	cg26001287	LINC00116	chr2	1.48923	0.202597	1.36e-07	3.12e-07	908647	Positive	protein_coding	-798	Promoter non-target gene eQTMs
ENSG00000163806	cg03275949	SPDYA	chr2	0.672487	0.0751625	2.36e-09	6.39e-09	891779	Positive	protein_coding	-797	Promoter non-target gene eQTMs
ENSG00000087111	cg12681669	PIGS	chr17	-8.76736	1.65577	0.00104606	0.00162998	19285	Negative	protein_coding	-796	Promoter-eQTMs
ENSG00000160410	cg19580847	SHKBP1	chr19	-2.53865	0.176644	4.7e-21	3.96e-20	-774796	Negative	protein_coding	-796	Promoter non-target gene eQTMs
ENSG00000149451	cg10850080	ADAM33	chr20	3.77205	0.743257	0.0196785	0.0261376	-866533	Negative	protein_coding	-795	Promoter non-target gene eQTMs
ENSG00000204442	cg05040544	FAM155A	chr13	-5.64963	0.601907	3.33e-12	1.17e-11	-627602	Negative	protein_coding	-794	Promoter non-target gene eQTMs
ENSG00000138663	cg06062730	COPS4	chr4	-7.87971	0.721908	3.8e-15	1.78e-14	-793	Negative	protein_coding	-793	Promoter-eQTMs
ENSG00000233461	cg27504802	RP11-295G20.2	chr1	0.416639	0.0304563	4.4e-20	3.37e-19	-357824	Positive	antisense	-793	Promoter non-target gene eQTMs
ENSG00000145284	cg06062730	SCD5	chr4	48.4228	3.12373	6.65e-26	9.63e-25	405701	Positive	protein_coding	-793	Promoter non-target gene eQTMs
ENSG00000163319	cg06062730	MRPS18C	chr4	-2.57014	0.18034	3.44e-22	3.29e-21	420692	Negative	protein_coding	-793	Promoter non-target gene eQTMs
ENSG00000254783	cg17081955	RP11-320L11.2	chr11	-0.289813	0.0585215	0.00134222	0.00206329	38590	Negative	processed_pseudogene	-793	Promoter non-target gene eQTMs
ENSG00000079785	cg01312393	DDX1	chr2	-24.3929	3.30961	5.23e-08	1.25e-07	-350178	Positive	protein_coding	-792	Promoter non-target gene eQTMs
ENSG00000256713	cg13324568	PGA5	chr11	-0.684838	0.112091	0.00216025	0.00324854	-188970	Negative	protein_coding	-792	Promoter non-target gene eQTMs
ENSG00000116455	cg09319202	WDR77	chr1	1.85673	0.34096	0.00022389	0.00037393	-475797	Positive	protein_coding	-791	Promoter non-target gene eQTMs
ENSG00000224928	cg25859012	KRT8P30	chr2	-0.339059	0.0445171	5.65e-08	1.34e-07	-293846	Positive	processed_pseudogene	-791	Promoter non-target gene eQTMs
ENSG00000127824	cg25859012	TUBA4A	chr2	-10.6783	2.49556	0.0291387	0.0379118	-590155	Negative	protein_coding	-791	Promoter non-target gene eQTMs
ENSG00000196981	cg11122781	WDR5B	chr3	-5.32159	0.377503	6.25e-22	5.8e-21	382283	Positive	protein_coding	-791	Promoter non-target gene eQTMs
ENSG00000116001	cg21288083	TIA1	chr2	135.121	11.4903	9.3e-16	4.62e-15	48732	Positive	protein_coding	-790	Promoter non-target gene eQTMs
ENSG00000198380	cg21288083	GFPT1	chr2	14.2397	2.43482	9.86e-05	0.00017093	938407	Positive	protein_coding	-790	Promoter non-target gene eQTMs
ENSG00000087338	cg21288083	GMCL1	chr2	6.75961	1.29924	0.0005698	0.00091312	-428516	Negative	protein_coding	-790	Promoter non-target gene eQTMs
ENSG00000255366	cg11220133	RP11-1134I14.8	chr8	0.815754	0.154078	0.00034184	0.00056084	-770201	Positive	lincRNA	-790	Promoter non-target gene eQTMs
ENSG00000250999	cg01055191	RP11-1379J22.5	chr5	-0.623287	0.0300078	2.12e-32	6.27e-31	-149425	Positive	antisense	-789	Promoter non-target gene eQTMs
ENSG00000133107	cg24669528	TRPC4	chr13	-0.324755	0.0657769	0.00148912	0.00228073	-961935	Negative	protein_coding	-789	Promoter non-target gene eQTMs
ENSG00000198818	cg06128195	SFT2D1	chr6	-4.25	0.336548	5.07e-18	3.15e-17	-332337	Negative	protein_coding	-788	Promoter non-target gene eQTMs
ENSG00000258881	cg18865999	AC007040.11	chr2	-0.883478	0.168638	0.0131666	0.0179243	-681147	Negative	protein_coding	-785	Promoter non-target gene eQTMs
ENSG00000182903	cg26262152	ZNF721	chr4	-10.0157	1.52899	9.43e-06	1.81e-05	74125	Positive	protein_coding	-784	Promoter-eQTMs
ENSG00000178585	cg02461388	CTNNBIP1	chr1	-39.6277	5.03514	6.71e-06	1.31e-05	582610	Negative	protein_coding	-784	Promoter non-target gene eQTMs
ENSG00000250602	cg09068004	RP11-517I3.1	chr5	-0.412555	0.0554106	4.35e-07	9.51e-07	659115	Negative	antisense	-784	Promoter non-target gene eQTMs
ENSG00000109113	cg00831928	RAB34	chr17	2.34382	0.305001	4.8e-07	1.05e-06	-51406	Positive	protein_coding	-784	Promoter non-target gene eQTMs
ENSG00000275902	cg08086652	RP13-1032I1.11	chr17	1.10131	0.167924	1.5e-05	2.82e-05	327061	Positive	antisense	-784	Promoter non-target gene eQTMs
ENSG00000213638	cg21959594	ADAT3	chr19	0.404543	0.0191962	1.66e-31	4.43e-30	92340	Positive	protein_coding	-783	Promoter non-target gene eQTMs
ENSG00000269352	cg09712606	PTOV1-AS2	chr19	-7.95484	0.775648	3.83e-11	1.21e-10	-191045	Negative	antisense	-783	Promoter non-target gene eQTMs
ENSG00000110455	cg00452199	ACCS	chr11	-1.29923	0.264096	0.00638029	0.00906863	-782	Negative	protein_coding	-782	Promoter-eQTMs
ENSG00000186842	cg23926280	LINC00846	chr21	0.998889	0.109226	3.85e-11	1.22e-10	40825	Positive	3prime_overlapping_ncRNA	-782	Promoter non-target gene eQTMs
ENSG00000083844	cg17897626	ZNF264	chr19	11.1919	2.45669	0.0101475	0.014035	547574	Positive	protein_coding	-781	Promoter non-target gene eQTMs
ENSG00000060762	cg05861708	MPC1	chr6	-7.78995	0.902183	1.16e-09	3.22e-09	-377536	Positive	protein_coding	-780	Promoter non-target gene eQTMs
ENSG00000073614	cg24323328	KDM5A	chr12	-36.1134	4.55582	4.9e-09	1.29e-08	710703	Negative	protein_coding	-779	Promoter non-target gene eQTMs
ENSG00000151065	cg24323328	DCP1B	chr12	-6.04543	0.911378	2.8e-06	5.65e-06	-955221	Negative	protein_coding	-779	Promoter non-target gene eQTMs
ENSG00000188687	cg09916336	SLC4A5	chr2	21.8066	2.75102	9.25e-09	2.37e-08	438763	Positive	protein_coding	-777	Promoter non-target gene eQTMs
ENSG00000109083	cg02668694	IFT20	chr17	-11.8015	0.613161	4.67e-31	1.19e-29	-285812	Negative	protein_coding	-776	Promoter non-target gene eQTMs
ENSG00000076382	cg02668694	SPAG5	chr17	-5.65207	0.438861	1.15e-16	6.23e-16	-535052	Negative	protein_coding	-776	Promoter non-target gene eQTMs
ENSG00000131849	cg17840453	ZNF132	chr19	2.30604	0.313234	4.56e-07	9.95e-07	111539	Positive	protein_coding	-775	Promoter non-target gene eQTMs
ENSG00000180353	cg04294566	HCLS1	chr3	-3.33439	0.641678	0.000706	0.00112006	752606	Negative	protein_coding	-774	Promoter non-target gene eQTMs
ENSG00000279423	cg03037002	RP11-671J11.5	chr14	-0.847799	0.18921	0.00734959	0.0103542	-334073	Negative	TEC	-774	Promoter non-target gene eQTMs
ENSG00000159337	cg18135893	PLA2G4D	chr15	-0.560237	0.104765	0.00129147	0.00198934	206996	Negative	protein_coding	-772	Promoter non-target gene eQTMs
ENSG00000171223	cg00774950	JUNB	chr19	316.633	28.1277	1.76e-09	4.82e-09	53575	Positive	protein_coding	-772	Promoter non-target gene eQTMs
ENSG00000160888	cg00774950	IER2	chr19	70.6815	5.22294	1.98e-08	4.91e-08	412500	Positive	protein_coding	-772	Promoter non-target gene eQTMs
ENSG00000067704	cg15356516	IARS2	chr1	-16.0099	1.25554	6.39e-19	4.33e-18	-786039	Positive	protein_coding	-771	Promoter non-target gene eQTMs
ENSG00000118873	cg15356516	RAB3GAP2	chr1	-9.38276	1.32798	1.05e-07	2.43e-07	731878	Negative	protein_coding	-771	Promoter non-target gene eQTMs
ENSG00000147421	cg15720343	HMBOX1	chr8	3.17217	0.358756	2.55e-09	6.87e-09	-767	Positive	protein_coding	-768	Promoter-eQTMs
ENSG00000137936	cg15495124	BCAR3	chr1	-1.34618	0.163301	4.14e-09	1.1e-08	-599451	Negative	protein_coding	-768	Promoter non-target gene eQTMs
ENSG00000132394	cg03771133	EEFSEC	chr3	3.27238	0.196646	3.19e-27	5.33e-26	-1162679	Positive	protein_coding	-768	Promoter non-target gene eQTMs
ENSG00000163902	cg03771133	RPN1	chr3	11.3966	0.862261	5.97e-20	4.51e-19	696191	Positive	protein_coding	-768	Promoter non-target gene eQTMs
ENSG00000048028	cg22977386	USP28	chr11	-14.3401	1.0142	3.56e-22	3.4e-21	262487	Negative	protein_coding	-768	Promoter non-target gene eQTMs
ENSG00000149295	cg22977386	DRD2	chr11	15.2094	1.12897	8.88e-22	8.11e-21	650756	Negative	protein_coding	-768	Promoter non-target gene eQTMs
ENSG00000182504	cg23505966	CEP97	chr3	4.83374	0.650273	3.95e-08	9.54e-08	-98	Negative	protein_coding	-766	Promoter-eQTMs
ENSG00000114354	cg23505966	TFG	chr3	10.795	1.18811	7.05e-11	2.18e-10	-1015360	Negative	protein_coding	-766	Promoter non-target gene eQTMs
ENSG00000174173	cg23505966	TRMT10C	chr3	1.92053	0.311707	1.29e-05	2.45e-05	-162823	Positive	protein_coding	-766	Promoter non-target gene eQTMs
ENSG00000256073	cg20591112	URB1-AS1	chr21	1.34489	0.165607	7.68e-09	1.98e-08	833119	Positive	lincRNA	-766	Promoter non-target gene eQTMs
ENSG00000149328	cg00430080	GLB1L2	chr11	-201.177	28.3438	9.37e-07	1.98e-06	-765	Negative	protein_coding	-765	Promoter-eQTMs
ENSG00000155254	cg07498937	MARVELD1	chr10	4.2678	0.447504	3.48e-09	9.28e-09	991894	Positive	protein_coding	-765	Promoter non-target gene eQTMs
ENSG00000135205	cg08296556	CCDC146	chr7	47.7153	3.57041	4.29e-21	3.62e-20	-676910	Positive	protein_coding	-764	Promoter non-target gene eQTMs
ENSG00000213463	cg25510485	SYNJ2BP	chr14	-14.06	1.53419	1.22e-11	4.06e-11	-967720	Negative	protein_coding	-764	Promoter non-target gene eQTMs
ENSG00000130338	cg15599146	TULP4	chr6	14.7192	1.36689	3.78e-12	1.32e-11	850340	Negative	protein_coding	-763	Promoter non-target gene eQTMs
ENSG00000279900	cg15838075	RP11-113K21.6	chr11	-0.204772	0.0252133	4.98e-09	1.31e-08	182950	Negative	TEC	-762	Promoter non-target gene eQTMs
ENSG00000064651	cg16752652	SLC12A2	chr5	13.635	1.96249	4.13e-06	8.2e-06	-761	Negative	protein_coding	-761	Promoter-eQTMs
ENSG00000093144	cg01043019	ECHDC1	chr6	-15.2828	1.84623	1.3e-09	3.6e-09	-169347	Positive	protein_coding	-761	Promoter non-target gene eQTMs
ENSG00000163913	cg26857078	IFT122	chr3	8.20417	1.55062	0.00085568	0.00134477	123884	Positive	protein_coding	-760	Promoter non-target gene eQTMs
ENSG00000156140	cg19739871	ADAMTS3	chr4	-10.642	0.964571	3.18e-15	1.5e-14	978588	Positive	protein_coding	-759	Promoter non-target gene eQTMs
ENSG00000102531	cg18582433	FNDC3A	chr13	-16.1028	2.08619	9.07e-07	1.92e-06	-757	Positive	protein_coding	-757	Promoter-eQTMs
ENSG00000239665	cg04499152	RP11-295P9.3	chr10	-8.26638	0.437715	2.54e-33	8.7e-32	101870	Positive	processed_transcript	-757	Promoter non-target gene eQTMs
ENSG00000136143	cg18582433	SUCLA2	chr13	-10.7855	0.977659	1.31e-15	6.42e-15	1230933	Negative	protein_coding	-757	Promoter non-target gene eQTMs
ENSG00000123179	cg18582433	EBPL	chr13	-1.65821	0.161471	5.69e-13	2.15e-12	-684005	Negative	protein_coding	-757	Promoter non-target gene eQTMs
ENSG00000249673	cg01190037	NOP14-AS1	chr4	3.66505	0.400688	1.53e-10	4.59e-10	-772	Positive	antisense	-755	Promoter-eQTMs
ENSG00000177873	cg07021228	ZNF619	chr3	3.18867	0.521578	7.52e-06	1.46e-05	-754	Positive	protein_coding	-754	Promoter-eQTMs
ENSG00000177842	cg07021228	ZNF620	chr3	2.43045	0.405844	5.06e-05	9.02e-05	-736	Positive	protein_coding	-754	Promoter non-target gene eQTMs
ENSG00000010017	cg07279321	RANBP9	chr6	-3.86858	0.908455	0.0238078	0.0313402	-903940	Negative	protein_coding	-753	Promoter non-target gene eQTMs
ENSG00000154736	cg02855633	ADAMTS5	chr21	6.10559	0.867459	0.00067069	0.00106615	-71760	Positive	protein_coding	-753	Promoter non-target gene eQTMs
ENSG00000111785	cg17738249	RIC8B	chr12	18.3184	1.81108	7.31e-14	3.01e-13	526913	Positive	protein_coding	-752	Promoter non-target gene eQTMs
ENSG00000112640	cg24514131	PPP2R5D	chr6	-8.87063	1.51742	0.0003515	0.00057616	237706	Negative	protein_coding	-751	Promoter non-target gene eQTMs
ENSG00000259017	cg04577910	RP11-561B11.6	chr14	-0.22353	0.0286532	5.21e-09	1.36e-08	-464295	Negative	lincRNA	-751	Promoter non-target gene eQTMs
ENSG00000197980	cg01843367	LEKR1	chr3	0.825378	0.127221	4.87e-06	9.6e-06	954195	Positive	protein_coding	-750	Promoter non-target gene eQTMs
ENSG00000113719	cg12504027	ERGIC1	chr5	19.3004	3.11235	2.69e-05	4.93e-05	826628	Positive	protein_coding	-750	Promoter non-target gene eQTMs
ENSG00000197885	cg12306156	NKIRAS1	chr3	-12.4733	1.82137	1.96e-07	4.43e-07	603176	Negative	protein_coding	-749	Promoter non-target gene eQTMs
ENSG00000174738	cg12306156	NR1D2	chr3	-32.4943	6.40284	0.00105402	0.00164165	-549550	Negative	protein_coding	-749	Promoter non-target gene eQTMs
ENSG00000167912	cg14596866	RP11-25K19.1	chr8	-0.964766	0.160632	2.5e-05	4.6e-05	-748	Negative	antisense	-748	Promoter-eQTMs
ENSG00000132405	cg02659117	TBC1D14	chr4	8.39728	1.7692	0.0043787	0.00635104	127119	Positive	protein_coding	-748	Promoter non-target gene eQTMs
ENSG00000086200	cg09732432	IPO11	chr5	13.3731	1.6492	1.09e-09	3.04e-09	97062	Positive	protein_coding	-748	Promoter non-target gene eQTMs
ENSG00000184752	cg19510484	NDUFA12	chr12	-7.35099	0.411218	9.47e-32	2.59e-30	577213	Positive	protein_coding	-748	Promoter non-target gene eQTMs
ENSG00000139343	cg19510484	SNRPF	chr12	-4.13309	0.264511	6.01e-25	7.79e-24	384660	Positive	protein_coding	-748	Promoter non-target gene eQTMs
ENSG00000254377	cg06829299	MIR124-2HG	chr8	-69.9395	15.2799	0.00391496	0.00570526	-924	Positive	lincRNA	-747	Promoter-eQTMs
ENSG00000265590	cg20644453	AP000275.65	chr21	3.76035	0.838987	0.00874647	0.012199	34206	Positive	protein_coding	-747	Promoter-eQTMs
ENSG00000117616	cg08972581	RSRP1	chr1	-18.4839	2.32903	4.62e-08	1.11e-07	577138	Negative	protein_coding	-747	Promoter non-target gene eQTMs
ENSG00000136783	cg11504635	NIPSNAP3A	chr9	8.42391	0.742378	3.1e-17	1.78e-16	-180616	Positive	protein_coding	-746	Promoter non-target gene eQTMs
ENSG00000106701	cg11504635	FSD1L	chr9	119.816	11.4311	3.89e-15	1.82e-14	519497	Positive	protein_coding	-746	Promoter non-target gene eQTMs
ENSG00000095209	cg11504635	TMEM38B	chr9	6.56187	0.862416	2.57e-08	6.31e-08	766242	Positive	protein_coding	-746	Promoter non-target gene eQTMs
ENSG00000136824	cg11504635	SMC2	chr9	9.31427	1.51093	2.1e-05	3.89e-05	-834039	Negative	protein_coding	-746	Promoter non-target gene eQTMs
ENSG00000142733	cg10489986	MAP3K6	chr1	4.80633	0.583654	1.51e-06	3.13e-06	-359615	Positive	protein_coding	-745	Promoter non-target gene eQTMs
ENSG00000118420	cg04397883	UBE3D	chr6	-0.81684	0.097348	1.1e-10	3.34e-10	301734	Negative	protein_coding	-745	Promoter non-target gene eQTMs
ENSG00000124772	cg17947140	CPNE5	chr6	-2.96625	0.362479	5.74e-08	1.36e-07	1079188	Negative	protein_coding	-745	Promoter non-target gene eQTMs
ENSG00000129315	cg06098346	CCNT1	chr12	18.5371	2.03361	5.13e-11	1.61e-10	-582574	Negative	protein_coding	-745	Promoter non-target gene eQTMs
ENSG00000278558	cg02723399	TMEM191B	chr22	-0.675866	0.0621365	2.6e-13	1.02e-12	-904845	Negative	protein_coding	-745	Promoter non-target gene eQTMs
ENSG00000273300	cg02723399	AC000068.9	chr22	0.301438	0.040163	3.79e-07	8.33e-07	21532	Positive	antisense	-745	Promoter non-target gene eQTMs
ENSG00000163053	cg18671774	SLC16A14	chr2	3.16353	0.555156	0.00624594	0.00888774	678607	Negative	protein_coding	-744	Promoter non-target gene eQTMs
ENSG00000240771	cg20263444	ARHGEF25	chr12	12.2792	1.62727	4.59e-08	1.1e-07	521373	Positive	protein_coding	-744	Promoter non-target gene eQTMs
ENSG00000140740	cg03031583	UQCRC2	chr16	-35.9662	2.50164	2.11e-23	2.3e-22	-740	Negative	protein_coding	-740	Promoter-eQTMs
ENSG00000050393	cg01288598	MCUR1	chr6	-39.2076	7.99339	0.00240989	0.00360519	331439	Positive	protein_coding	-740	Promoter non-target gene eQTMs
ENSG00000174943	cg10423428	KCTD13	chr16	-11.647	0.641524	1.11e-29	2.4e-28	278555	Negative	protein_coding	-740	Promoter non-target gene eQTMs
ENSG00000198064	cg10423428	RP11-347C12.1	chr16	-10.1827	0.524872	4.28e-29	8.69e-28	-39370	Negative	protein_coding	-740	Promoter non-target gene eQTMs
ENSG00000103495	cg10423428	MAZ	chr16	-41.9026	2.50724	2.19e-27	3.74e-26	-377461	Negative	protein_coding	-740	Promoter non-target gene eQTMs
ENSG00000261346	cg10423428	RP11-297C4.2	chr16	-0.491286	0.0338185	1.51e-19	1.1e-18	-293613	Negative	antisense	-740	Promoter non-target gene eQTMs
ENSG00000260487	cg10423428	RP11-297C4.3	chr16	-0.482206	0.0569494	1.18e-08	2.99e-08	-297021	Negative	antisense	-740	Promoter non-target gene eQTMs
ENSG00000213599	cg10423428	SLX1A-SULT1A3	chr16	-8.47296	0.835523	5.16e-08	1.23e-07	10325	Negative	processed_transcript	-740	Promoter non-target gene eQTMs
ENSG00000198722	cg17918703	UNC13B	chr9	-50.2536	4.17046	9.54e-19	6.37e-18	171874	Negative	protein_coding	-739	Promoter non-target gene eQTMs
ENSG00000218336	cg02075087	TENM3	chr4	14.8023	2.91498	0.00149046	0.00228257	-1361243	Positive	protein_coding	-736	Promoter non-target gene eQTMs
ENSG00000196152	cg00757413	ZNF79	chr9	3.12065	0.682486	0.00907858	0.0126301	26500	Positive	protein_coding	-736	Promoter non-target gene eQTMs
ENSG00000280265	cg07157333	CTA-363E6.3	chr16	1.42083	0.207024	3.46e-06	6.91e-06	19019	Positive	TEC	-736	Promoter non-target gene eQTMs
ENSG00000259925	cg07157333	CTA-363E6.2	chr16	1.35826	0.212253	9.86e-06	1.89e-05	67585	Positive	lincRNA	-736	Promoter non-target gene eQTMs
ENSG00000223813	cg11267619	AC007255.8	chr7	0.779405	0.0506579	1.3e-12	4.75e-12	50181	Positive	antisense	-735	Promoter-eQTMs
ENSG00000102189	cg14362201	EEA1	chr12	-10.626	1.76685	3.62e-05	6.56e-05	-626988	Positive	protein_coding	-735	Promoter non-target gene eQTMs
ENSG00000143224	cg04603146	PPOX	chr1	-11.5598	2.55934	0.0108389	0.0149418	-234085	Negative	protein_coding	-732	Promoter non-target gene eQTMs
ENSG00000164011	cg27508416	ZNF691	chr1	-1.79121	0.294237	4.22e-05	7.58e-05	389725	Negative	protein_coding	-731	Promoter non-target gene eQTMs
ENSG00000162572	cg10756715	SCNN1D	chr1	8.21445	0.484181	4.05e-27	6.72e-26	-335709	Positive	protein_coding	-730	Promoter non-target gene eQTMs
ENSG00000101421	cg19193852	CHMP4B	chr20	-5.8406	0.70997	3.75e-09	9.97e-09	136155	Negative	protein_coding	-730	Promoter non-target gene eQTMs
ENSG00000107651	cg15752043	SEC23IP	chr10	-7.69534	0.603884	6.02e-19	4.09e-18	862287	Negative	protein_coding	-727	Promoter non-target gene eQTMs
ENSG00000139624	cg00097794	CERS5	chr12	8.81105	1.35004	4.31e-06	8.54e-06	919383	Positive	protein_coding	-727	Promoter non-target gene eQTMs
ENSG00000136002	cg09596239	ARHGEF4	chr2	-10.8728	1.15919	1.93e-12	6.92e-12	654453	Negative	protein_coding	-726	Promoter non-target gene eQTMs
ENSG00000145391	cg00486611	SETD7	chr4	-5.41055	0.766834	3.14e-07	6.95e-07	878165	Negative	protein_coding	-725	Promoter non-target gene eQTMs
ENSG00000258643	cg16066294	BCL2L2-PABPN1	chr14	-3.05897	0.611258	0.0122125	0.0167069	211345	Negative	protein_coding	-725	Promoter non-target gene eQTMs
ENSG00000236263	cg00660163	RP11-263K19.6	chr1	-0.888031	0.0445793	1.47e-31	3.96e-30	871570	Negative	antisense	-723	Promoter non-target gene eQTMs
ENSG00000144560	cg13518792	VGLL4	chr3	-9.25163	1.55072	5.04e-05	8.99e-05	732022	Negative	protein_coding	-723	Promoter non-target gene eQTMs
ENSG00000279536	cg00365505	RP11-445N20.2	chr7	0.296427	0.0410386	3.16e-06	6.34e-06	-487435	Positive	TEC	-723	Promoter non-target gene eQTMs
ENSG00000241832	cg07597874	CECR3	chr22	2.43944	0.472386	0.00083686	0.00131661	821784	Positive	lincRNA	-723	Promoter non-target gene eQTMs
ENSG00000116641	cg18124616	DOCK7	chr1	14.6171	1.39039	5.52e-14	2.3e-13	-17282	Positive	protein_coding	-719	Promoter non-target gene eQTMs
ENSG00000243147	cg00022308	MRPL33	chr2	-8.82132	0.37747	2.69e-43	3.64e-41	142753	Negative	protein_coding	-717	Promoter non-target gene eQTMs
ENSG00000228474	cg00022308	OST4	chr2	-4.46792	0.439709	5.52e-13	2.09e-12	558492	Positive	protein_coding	-717	Promoter non-target gene eQTMs
ENSG00000100106	cg19258170	TRIOBP	chr22	-23.6726	1.28248	1.23e-28	2.4e-27	-1009392	Negative	protein_coding	-717	Promoter non-target gene eQTMs
ENSG00000100346	cg19258170	CACNA1I	chr22	-18.7796	1.48976	3.04e-18	1.94e-17	864313	Negative	protein_coding	-717	Promoter non-target gene eQTMs
ENSG00000197223	cg15810720	C1D	chr2	-4.38801	0.40941	7.78e-15	3.52e-14	212456	Negative	protein_coding	-716	Promoter non-target gene eQTMs
ENSG00000244119	cg11804524	PDCL3P4	chr3	-1.76653	0.261102	4.17e-07	9.13e-07	-67445	Negative	processed_pseudogene	-715	Promoter non-target gene eQTMs
ENSG00000157379	cg07282151	DHRS1	chr14	-2.57891	0.42757	3.82e-05	6.9e-05	-968597	Negative	protein_coding	-712	Promoter non-target gene eQTMs
ENSG00000165806	cg08245930	CASP7	chr10	8.96396	1.45635	8.14e-05	0.00014242	-711	Positive	protein_coding	-711	Promoter-eQTMs
ENSG00000246067	cg14662260	RAB30-AS1	chr11	4.22183	0.563435	5.46e-07	1.18e-06	-122396	Positive	lincRNA	-709	Promoter non-target gene eQTMs
ENSG00000173947	cg01011619	PIFO	chr1	-9.2309	0.891907	2.83e-12	9.99e-12	382590	Positive	protein_coding	-708	Promoter non-target gene eQTMs
ENSG00000156171	cg01011619	DRAM2	chr1	-15.3793	1.70539	7.4e-10	2.09e-09	-153323	Negative	protein_coding	-708	Promoter non-target gene eQTMs
ENSG00000163281	cg09538658	GNPDA2	chr4	-4.91507	0.53161	1.94e-12	6.95e-12	-232685	Negative	protein_coding	-708	Promoter non-target gene eQTMs
ENSG00000177363	cg00435526	LRRN4CL	chr11	0.841901	0.082065	1.67e-08	4.17e-08	-20521	Positive	protein_coding	-707	Promoter non-target gene eQTMs
ENSG00000166145	cg26231582	SPINT1	chr15	1.37518	0.214337	0.0105704	0.0145889	460592	Positive	protein_coding	-705	Promoter non-target gene eQTMs
ENSG00000213918	cg02680314	DNASE1	chr16	4.55761	0.950931	0.00658313	0.00932978	564342	Positive	protein_coding	-705	Promoter non-target gene eQTMs
ENSG00000145244	cg26634911	CORIN	chr4	0.823081	0.186592	0.0102171	0.0141268	320847	Positive	protein_coding	-704	Promoter non-target gene eQTMs
ENSG00000235859	cg23708842	AC006978.6	chr7	-1.85832	0.17256	9.52e-13	3.52e-12	344120	Negative	processed_pseudogene	-704	Promoter non-target gene eQTMs
ENSG00000117600	cg16174952	PLPPR4	chr1	5.22679	1.16865	0.00581987	0.00830972	-706539	Positive	protein_coding	-703	Promoter non-target gene eQTMs
ENSG00000167771	cg02514974	RCOR2	chr11	4.65754	0.398965	6.66e-15	3.04e-14	315413	Positive	protein_coding	-702	Promoter non-target gene eQTMs
ENSG00000151881	cg16986441	TMEM267	chr5	1.3672	0.301184	0.00767605	0.0107856	-251480	Negative	protein_coding	-701	Promoter non-target gene eQTMs
ENSG00000028839	cg24176037	TBPL1	chr6	-2.30446	0.321876	1.47e-07	3.36e-07	-700	Negative	protein_coding	-700	Promoter-eQTMs
ENSG00000161664	cg16931499	ASB16	chr17	1.29528	0.0759585	1.47e-25	2.05e-24	-538861	Positive	protein_coding	-700	Promoter non-target gene eQTMs
ENSG00000163634	cg16258503	THOC7	chr3	10.5054	0.782562	1.36e-20	1.1e-19	30732	Positive	protein_coding	-699	Promoter-eQTMs
ENSG00000163618	cg16258503	CADPS	chr3	25.9429	6.4993	0.0381223	0.0488303	1466256	Positive	protein_coding	-699	Promoter non-target gene eQTMs
ENSG00000186908	cg24916116	ZDHHC17	chr12	28.3381	2.17899	9.45e-21	7.76e-20	732395	Negative	protein_coding	-699	Promoter non-target gene eQTMs
ENSG00000179941	cg24916116	BBS10	chr12	3.45894	0.491609	5.12e-07	1.11e-06	-313281	Negative	protein_coding	-699	Promoter non-target gene eQTMs
ENSG00000091039	cg24916116	OSBPL8	chr12	5.77365	1.15093	0.0008901	0.00139612	-320604	Positive	protein_coding	-699	Promoter non-target gene eQTMs
ENSG00000280571	cg12832630	RP4-613B23.5	chr3	-29.8546	0.981652	8.32e-58	1.22e-54	985055	Positive	protein_coding	-698	Promoter non-target gene eQTMs
ENSG00000073536	cg01565438	NLE1	chr17	2.45889	0.269184	1.37e-11	4.53e-11	320805	Positive	protein_coding	-698	Promoter non-target gene eQTMs
ENSG00000182704	cg23640019	TSKU	chr11	14.1418	1.68097	4.9e-05	8.75e-05	966387	Positive	protein_coding	-697	Promoter non-target gene eQTMs
ENSG00000080839	cg13946860	RBL1	chr20	3.80283	0.302401	2.84e-18	1.82e-17	182758	Positive	protein_coding	-697	Promoter non-target gene eQTMs
ENSG00000135124	cg17914881	P2RX4	chr12	-2.89488	0.239296	2.16e-17	1.26e-16	-190735	Negative	protein_coding	-696	Promoter non-target gene eQTMs
ENSG00000158113	cg17914881	LRRC43	chr12	-0.626776	0.0894923	4.66e-06	9.2e-06	767146	Negative	protein_coding	-696	Promoter non-target gene eQTMs
ENSG00000213578	cg19286699	CPLX3	chr15	143.803	11.1682	6.43e-17	3.56e-16	451255	Positive	protein_coding	-694	Promoter non-target gene eQTMs
ENSG00000084774	cg04151012	CAD	chr2	4.62424	0.593513	2.85e-08	6.97e-08	-366293	Negative	protein_coding	-693	Promoter non-target gene eQTMs
ENSG00000262001	cg24732823	DLGAP1-AS2	chr18	-0.965377	0.184828	0.00190823	0.00288715	340457	Negative	antisense	-693	Promoter non-target gene eQTMs
ENSG00000111596	cg18262805	CNOT2	chr12	27.5565	2.99335	2.58e-12	9.13e-12	657579	Negative	protein_coding	-692	Promoter non-target gene eQTMs
ENSG00000127328	cg18262805	RAB3IP	chr12	32.7356	5.38357	1.9e-05	3.54e-05	153266	Positive	protein_coding	-692	Promoter non-target gene eQTMs
ENSG00000166225	cg18262805	FRS2	chr12	10.5013	1.83087	0.0001698	0.00028698	-115066	Negative	protein_coding	-692	Promoter non-target gene eQTMs
ENSG00000205084	cg22863815	TMEM231	chr16	-3.69795	0.507731	2.79e-07	6.2e-07	-76033	Negative	protein_coding	-691	Promoter non-target gene eQTMs
ENSG00000110063	cg13169525	DCPS	chr11	9.31628	0.42519	1.25e-38	8.79e-37	91957	Negative	protein_coding	-689	Promoter non-target gene eQTMs
ENSG00000137207	cg15773716	YIPF3	chr6	8.93541	1.18255	6.47e-08	1.53e-07	876381	Positive	protein_coding	-688	Promoter non-target gene eQTMs
ENSG00000157593	cg15773716	SLC35B2	chr6	2.69539	0.519595	0.00109368	0.00170042	134117	Positive	protein_coding	-688	Promoter non-target gene eQTMs
ENSG00000124574	cg15773716	ABCC10	chr6	1.98646	0.400728	0.00231947	0.00347644	-960847	Positive	protein_coding	-688	Promoter non-target gene eQTMs
ENSG00000127990	cg16492735	SGCE	chr7	-9.24051	2.31221	0.0291121	0.03788	132692	Negative	protein_coding	-687	Promoter-eQTMs
ENSG00000215861	cg07090989	WI2-1896O14.1	chr1	11.6754	1.87847	1.61e-05	3.02e-05	1070894	Positive	unprocessed_pseudogene	-686	Promoter non-target gene eQTMs
ENSG00000244039	cg08400120	RP11-379K17.2	chr3	-6.92346	0.644927	8.94e-16	4.45e-15	-291053	Positive	processed_pseudogene	-686	Promoter non-target gene eQTMs
ENSG00000237686	cg00910127	RP5-1120P11.1	chr6	-1.9595	0.408797	0.00527443	0.00757522	318289	Negative	antisense	-686	Promoter non-target gene eQTMs
ENSG00000185052	cg09560043	SLC24A3	chr20	6.19132	0.884625	4.71e-07	1.03e-06	-805156	Positive	protein_coding	-686	Promoter non-target gene eQTMs
ENSG00000090487	cg22900193	SPG21	chr15	13.6309	1.29178	1.57e-12	5.68e-12	568081	Positive	protein_coding	-685	Promoter non-target gene eQTMs
ENSG00000143126	cg01416227	CELSR2	chr1	47.4902	3.06755	1.78e-25	2.45e-24	-234624	Negative	protein_coding	-684	Promoter non-target gene eQTMs
ENSG00000273373	cg01416227	RP5-1074L1.4	chr1	-9.12773	0.574327	2.46e-25	3.31e-24	885991	Negative	antisense	-684	Promoter non-target gene eQTMs
ENSG00000168710	cg01416227	AHCYL1	chr1	-32.7596	3.0138	1.57e-15	7.62e-15	500602	Negative	protein_coding	-684	Promoter non-target gene eQTMs
ENSG00000134186	cg01416227	PRPF38B	chr1	-13.664	1.49866	2.65e-10	7.78e-10	-791853	Negative	protein_coding	-684	Promoter non-target gene eQTMs
ENSG00000272341	cg27189276	RP1-151F17.2	chr6	32.2226	2.67662	8.35e-17	4.59e-16	-942595	Positive	lincRNA	-684	Promoter non-target gene eQTMs
ENSG00000163812	cg05782440	ZDHHC3	chr3	-3.92728	0.848465	0.0061491	0.00875419	311704	Negative	protein_coding	-683	Promoter non-target gene eQTMs
ENSG00000260160	cg02339198	CTC-471J1.2	chr19	0.48848	0.093573	0.00119194	0.00184404	132227	Positive	sense_overlapping	-678	Promoter non-target gene eQTMs
ENSG00000154511	cg16316947	FAM69A	chr1	5.90042	1.24356	0.00298335	0.00441164	347858	Positive	protein_coding	-676	Promoter non-target gene eQTMs
ENSG00000138468	cg10791930	SENP7	chr3	22.0215	1.99414	1.12e-15	5.52e-15	400395	Negative	protein_coding	-675	Promoter non-target gene eQTMs
ENSG00000081154	cg10791930	PCNP	chr3	63.2167	6.57051	2.19e-13	8.63e-13	-150505	Negative	protein_coding	-675	Promoter non-target gene eQTMs
ENSG00000133740	cg26669044	E2F5	chr8	-0.439494	0.0844764	0.00073595	0.00116578	993692	Negative	protein_coding	-675	Promoter non-target gene eQTMs
ENSG00000111229	cg01195610	ARPC3	chr12	-6.65141	0.550093	3.4e-16	1.76e-15	-860895	Negative	protein_coding	-673	Promoter non-target gene eQTMs
ENSG00000196653	cg15602950	ZNF502	chr3	-11.637	1.47102	5.22e-08	1.25e-07	-977085	Negative	protein_coding	-672	Promoter non-target gene eQTMs
ENSG00000198920	cg06421614	KIAA0753	chr17	-7.55047	0.431873	4.66e-28	8.48e-27	639650	Negative	protein_coding	-672	Promoter non-target gene eQTMs
ENSG00000152214	cg24534145	RIT2	chr18	-0.534773	0.124738	0.00482205	0.00695565	535095	Negative	protein_coding	-672	Promoter non-target gene eQTMs
ENSG00000099377	cg04349810	HSD3B7	chr16	-1.23307	0.15222	4.4e-08	1.06e-07	-473544	Negative	protein_coding	-671	Promoter non-target gene eQTMs
ENSG00000119965	cg01246254	C10orf88	chr10	-6.94495	0.561859	5e-18	3.1e-17	-555535	Negative	protein_coding	-670	Promoter non-target gene eQTMs
ENSG00000154473	cg01246254	BUB3	chr10	-15.1684	1.32708	4.62e-16	2.36e-15	779036	Positive	protein_coding	-670	Promoter non-target gene eQTMs
ENSG00000107672	cg01246254	NSMCE4A	chr10	-10.8338	1.07263	1.34e-12	4.89e-12	418275	Negative	protein_coding	-670	Promoter non-target gene eQTMs
ENSG00000095574	cg01246254	IKZF5	chr10	-14.9831	2.04167	3.11e-07	6.89e-07	-615440	Negative	protein_coding	-670	Promoter non-target gene eQTMs
ENSG00000068831	cg10181845	RASGRP2	chr11	-2.33403	0.246464	2.46e-09	6.64e-09	-540969	Negative	protein_coding	-670	Promoter non-target gene eQTMs
ENSG00000174842	cg20609057	GLMN	chr1	22.0867	2.31359	6.44e-13	2.42e-12	934186	Positive	protein_coding	-669	Promoter non-target gene eQTMs
ENSG00000154928	cg17775713	EPHB1	chr3	-5.42499	0.703331	8.98e-08	2.09e-07	851176	Negative	protein_coding	-669	Promoter non-target gene eQTMs
ENSG00000154719	cg24388771	MRPL39	chr21	-3.74439	0.252349	1.98e-23	2.17e-22	22527	Negative	protein_coding	-666	Promoter-eQTMs
ENSG00000085982	cg15235893	USP40	chr2	6.96198	1.38357	0.00280042	0.00415688	1022199	Negative	protein_coding	-666	Promoter non-target gene eQTMs
ENSG00000245888	cg06897606	FLJ21408	chr16	0.35597	0.0628244	0.00012631	0.00021619	-991147	Positive	antisense	-666	Promoter non-target gene eQTMs
ENSG00000154723	cg24388771	ATP5J	chr21	-17.2507	0.990124	7.48e-31	1.86e-29	-108320	Negative	protein_coding	-666	Promoter non-target gene eQTMs
ENSG00000067208	cg04129046	EVI5	chr1	4.84747	0.654434	5.66e-08	1.35e-07	671888	Positive	protein_coding	-665	Promoter non-target gene eQTMs
ENSG00000131504	cg15571782	DIAPH1	chr5	-16.2963	1.55655	7.45e-14	3.06e-13	-822926	Negative	protein_coding	-664	Promoter non-target gene eQTMs
ENSG00000118518	cg07279933	RNF146	chr6	-22.9658	1.89189	1.82e-18	1.18e-17	147342	Negative	protein_coding	-664	Promoter non-target gene eQTMs
ENSG00000152894	cg07279933	PTPRK	chr6	-8.37243	1.38535	1.66e-05	3.11e-05	-849511	Negative	protein_coding	-664	Promoter non-target gene eQTMs
ENSG00000115839	cg04807900	RAB3GAP1	chr2	-14.8319	1.20327	5.7e-19	3.89e-18	133368	Negative	protein_coding	-662	Promoter non-target gene eQTMs
ENSG00000144224	cg04807900	UBXN4	chr2	-61.2757	5.03826	8.74e-19	5.86e-18	822837	Negative	protein_coding	-662	Promoter non-target gene eQTMs
ENSG00000197959	cg26839871	DNM3	chr1	-28.238	4.54485	1.22e-05	2.32e-05	-661	Negative	protein_coding	-661	Promoter-eQTMs
ENSG00000100647	cg13099429	SUSD6	chr14	-13.4092	2.36842	0.00121523	0.00187727	-748796	Negative	protein_coding	-661	Promoter non-target gene eQTMs
ENSG00000172568	cg05358175	FNDC9	chr5	1.07257	0.189885	7.48e-05	0.00013138	-74860	Positive	protein_coding	-659	Promoter non-target gene eQTMs
ENSG00000258559	cg23667592	AC005519.4	chr14	-1.94073	0.16679	5.99e-17	3.33e-16	-203975	Negative	sense_overlapping	-659	Promoter non-target gene eQTMs
ENSG00000133961	cg23667592	NUMB	chr14	-8.21276	0.829814	3.34e-12	1.17e-11	810045	Negative	protein_coding	-659	Promoter non-target gene eQTMs
ENSG00000215271	cg21774047	HOMEZ	chr14	-3.9396	0.69774	0.00020947	0.00035059	874920	Negative	protein_coding	-659	Promoter non-target gene eQTMs
ENSG00000117543	cg05432061	DPH5	chr1	-1.9822	0.158792	6e-19	4.08e-18	-856010	Negative	protein_coding	-658	Promoter non-target gene eQTMs
ENSG00000117407	cg09266468	ARTN	chr1	-1.06721	0.139581	3.38e-07	7.47e-07	-842588	Negative	protein_coding	-657	Promoter non-target gene eQTMs
ENSG00000281912	cg09266468	LINC01144	chr1	-1.06817	0.202089	0.00099667	0.00155591	528002	Negative	lincRNA	-657	Promoter non-target gene eQTMs
ENSG00000126106	cg09266468	TMEM53	chr1	-3.27437	0.629275	0.00132889	0.00204422	140670	Negative	protein_coding	-657	Promoter non-target gene eQTMs
ENSG00000110218	cg03129853	PANX1	chr11	-1.11435	0.185601	3.63e-05	6.58e-05	-742	Negative	protein_coding	-655	Promoter-eQTMs
ENSG00000151967	cg17472985	SCHIP1	chr3	-6.59147	0.462946	6.54e-23	6.78e-22	-560068	Positive	protein_coding	-655	Promoter non-target gene eQTMs
ENSG00000169251	cg17472985	NMD3	chr3	-6.98272	0.735384	1.57e-12	5.68e-12	704767	Negative	protein_coding	-655	Promoter non-target gene eQTMs
ENSG00000184743	cg15485477	ATL3	chr11	-5.93964	1.05631	0.00046887	0.00075851	661272	Negative	protein_coding	-655	Promoter non-target gene eQTMs
ENSG00000163354	cg15204354	DCST2	chr1	-17.9224	4.12029	0.0382935	0.0490424	15915	Negative	protein_coding	-654	Promoter-eQTMs
ENSG00000006194	cg12741488	ZNF263	chr16	-4.27415	0.678124	3.69e-05	6.68e-05	379960	Negative	protein_coding	-654	Promoter non-target gene eQTMs
ENSG00000229191	cg18551618	RP11-168O16.1	chr1	-2.79021	0.439492	0.0002692	0.00044579	353789	Negative	antisense	-653	Promoter non-target gene eQTMs
ENSG00000245937	cg25998860	LINC01184	chr5	3.06595	0.545549	0.00010109	0.000175	-420890	Positive	lincRNA	-653	Promoter non-target gene eQTMs
ENSG00000186998	cg08048137	EMID1	chr22	0.504199	0.0477343	8.95e-14	3.65e-13	132165	Negative	protein_coding	-653	Promoter non-target gene eQTMs
ENSG00000109618	cg19113954	SEPSECS	chr4	-4.53399	0.434862	3.98e-13	1.52e-12	41080	Negative	protein_coding	-652	Promoter-eQTMs
ENSG00000146476	cg11599612	ARMT1	chr6	12.2607	1.27759	2.1e-12	7.51e-12	586057	Negative	protein_coding	-652	Promoter non-target gene eQTMs
ENSG00000234492	cg18523371	RPL34-AS1	chr4	-0.725016	0.0557621	1.62e-20	1.3e-19	-547825	Negative	lincRNA	-651	Promoter non-target gene eQTMs
ENSG00000005810	cg04139515	MYCBP2	chr13	35.8532	3.1609	8.36e-17	4.59e-16	653847	Negative	protein_coding	-650	Promoter non-target gene eQTMs
ENSG00000126091	cg22023046	ST3GAL3	chr1	16.676	1.1848	3.55e-20	2.74e-19	-1070076	Positive	protein_coding	-649	Promoter non-target gene eQTMs
ENSG00000278991	cg27222947	RP11-797A18.5	chr15	-1.19614	0.0937696	1.08e-18	7.17e-18	357396	Positive	TEC	-649	Promoter non-target gene eQTMs
[truncated: 6,997 more rows]

## Sheet: SE
Gene_ID	CpG	Gene_symbol	Chr	beta	se	p.value	FDR	Distance	Correlation	Biotype	TSS-variant_Distance	Type
ENSG00000162591	cg19359929	MEGF6	chr1	-16.3845	1.32074	4.36e-14	1.83e-13	137248	Negative	protein_coding	-13704	Distal target gene eQTMs
ENSG00000196182	cg15387272	STK40	chr1	-7.93828	0.652112	4.16e-17	2.35e-16	58284	Negative	protein_coding	-12012	Distal target gene eQTMs
ENSG00000143641	cg03525122	GALNT2	chr1	9.4994	2.03033	0.00705286	0.00996495	-10046	Positive	protein_coding	-10046	Distal target gene eQTMs
ENSG00000116161	cg15340874	CACYBP	chr1	15.6852	2.19886	3.83e-06	7.62e-06	-1322	Negative	protein_coding	-1322	Promoter-eQTMs
ENSG00000069424	cg25225169	KCNAB2	chr1	32.7073	2.35684	1.87e-20	1.49e-19	-1345	Positive	protein_coding	-806	Promoter-eQTMs
ENSG00000227533	cg09003612	SLC2A1-AS1	chr1	-1.50717	0.263025	0.00074104	0.00117362	-502	Negative	lincRNA	-502	Promoter-eQTMs
ENSG00000117115	cg10233913	PADI2	chr1	-24.4088	4.97917	0.00261854	0.00390173	52906	Negative	protein_coding	-232	Promoter-eQTMs
ENSG00000097033	cg09799432	SH3GLB1	chr1	-36.041	3.68173	5.23e-13	1.99e-12	126	Negative	protein_coding	126	Promoter-eQTMs
ENSG00000143514	cg01022171	TP53BP2	chr1	-26.8285	4.36698	5e-06	9.84e-06	65512	Negative	protein_coding	567	Promoter-eQTMs
ENSG00000121851	cg27236173	POLR3GL	chr1	-6.31097	1.63075	0.0311743	0.0403958	6628	Negative	protein_coding	6640	Distal target gene eQTMs
ENSG00000270171	cg25763306	RP11-338N10.1	chr1	-3.61837	0.332374	2.38e-14	1.03e-13	-11968	Negative	lincRNA	13688	Distal target gene eQTMs
ENSG00000162373	cg10090188	BEND5	chr1	-0.757602	0.188143	0.0231193	0.0304725	26009	Negative	protein_coding	23441	Distal target gene eQTMs
ENSG00000117394	cg00045275	SLC2A1	chr1	258.339	50.8601	0.00909739	0.0126533	-1403	Positive	protein_coding	35201	Distal target gene eQTMs
ENSG00000203709	cg05652609	C1orf132	chr1	-26.716	2.48132	5.87e-14	2.44e-13	22468	Positive	lincRNA	55110	Distal target gene eQTMs
ENSG00000272033	cg12933719	RP11-52A20.2	chr1	1.00818	0.10814	1.07e-07	2.47e-07	152930	Negative	sense_intronic	152930	Distal target gene eQTMs
ENSG00000116641	cg18124616	DOCK7	chr1	14.6171	1.39039	5.52e-14	2.3e-13	-17282	Positive	protein_coding	251352	Distal target gene eQTMs
ENSG00000142634	cg14793291	EFHD2	chr1	-7.95239	0.503194	1.33e-23	1.49e-22	-439676	Negative	protein_coding	-1700	Promoter non-target gene eQTMs
ENSG00000163444	cg13134514	TMEM183A	chr1	-10.111	1.04885	1.11e-12	4.09e-12	196488	Negative	protein_coding	-1416	Promoter non-target gene eQTMs
ENSG00000198892	cg13134514	SHISA4	chr1	4.18003	0.62191	4.9e-06	9.65e-06	-922206	Negative	protein_coding	-1416	Promoter non-target gene eQTMs
ENSG00000143207	cg15340874	RFWD2	chr1	8.13752	0.883066	1.27e-11	4.22e-11	-944346	Positive	protein_coding	-1322	Promoter non-target gene eQTMs
ENSG00000153904	cg18635645	DDAH1	chr1	46.0038	3.78238	2.93e-18	1.87e-17	-116373	Positive	protein_coding	-1062	Promoter non-target gene eQTMs
ENSG00000162444	cg13374225	RBP7	chr1	-0.923489	0.107252	1.53e-08	3.83e-08	-36560	Negative	protein_coding	-934	Promoter non-target gene eQTMs
ENSG00000168243	cg12009109	GNG4	chr1	7.50158	0.859341	9.71e-09	2.48e-08	-219405	Negative	protein_coding	-930	Promoter non-target gene eQTMs
ENSG00000168275	cg06812651	COA6	chr1	-1.99736	0.160826	8.99e-19	6.02e-18	-236897	Negative	protein_coding	-828	Promoter non-target gene eQTMs
ENSG00000173726	cg06812651	TOMM20	chr1	-25.2967	2.91249	2.12e-10	6.28e-10	-498988	Negative	protein_coding	-828	Promoter non-target gene eQTMs
ENSG00000152904	cg06812651	GGPS1	chr1	-5.73741	0.703187	3.37e-09	9e-09	716997	Positive	protein_coding	-828	Promoter non-target gene eQTMs
ENSG00000117862	cg05923103	TXNDC12	chr1	-9.79942	0.352306	1.56e-49	6.23e-47	-784220	Positive	protein_coding	-815	Promoter non-target gene eQTMs
ENSG00000158292	cg25225169	GPR153	chr1	11.854	0.742656	1.9e-22	1.87e-21	-255081	Positive	protein_coding	-806	Promoter non-target gene eQTMs
ENSG00000236263	cg00660163	RP11-263K19.6	chr1	-0.888031	0.0445793	1.47e-31	3.96e-30	871570	Negative	antisense	-723	Promoter non-target gene eQTMs
ENSG00000142611	cg19359929	PRDM16	chr1	-0.83114	0.0975294	2.55e-06	5.17e-06	-556031	Negative	protein_coding	-456	Promoter non-target gene eQTMs
ENSG00000143158	cg17423711	MPC2	chr1	6.51533	1.36984	0.0097515	0.0135149	-695734	Positive	protein_coding	-429	Promoter non-target gene eQTMs
ENSG00000271121	cg13947666	NUDT4P2	chr1	0.728374	0.0720966	2.23e-10	6.59e-10	336378	Positive	processed_pseudogene	-404	Promoter non-target gene eQTMs
ENSG00000162825	cg13947666	NBPF20	chr1	-1.5472	0.389219	0.0163086	0.0219199	671892	Negative	protein_coding	-404	Promoter non-target gene eQTMs
ENSG00000118200	cg20869257	CAMSAP2	chr1	30.206	7.02348	0.0233358	0.0307465	-544262	Positive	protein_coding	-368	Promoter non-target gene eQTMs
ENSG00000203814	cg02961109	HIST2H2BF	chr1	-1.30368	0.30471	0.0239998	0.0315716	797372	Negative	protein_coding	-323	Promoter non-target gene eQTMs
ENSG00000143222	cg27510197	UFC1	chr1	-16.0925	1.93196	3.38e-09	9.02e-09	947137	Positive	protein_coding	-302	Promoter non-target gene eQTMs
ENSG00000130940	cg01576340	CASZ1	chr1	-101.854	17.9334	0.00037954	0.00061982	-726003	Negative	protein_coding	-265	Promoter non-target gene eQTMs
ENSG00000152382	cg20540042	TADA1	chr1	-9.54605	0.826284	1.34e-16	7.2e-16	364245	Negative	protein_coding	-243	Promoter non-target gene eQTMs
ENSG00000143164	cg20540042	DCAF6	chr1	-12.1331	1.63582	6.43e-08	1.52e-07	715028	Negative	protein_coding	-243	Promoter non-target gene eQTMs
ENSG00000143155	cg20540042	TIPRL	chr1	-4.94369	1.01099	0.00281196	0.00417214	958207	Negative	protein_coding	-243	Promoter non-target gene eQTMs
ENSG00000162521	cg04680037	RBBP4	chr1	71.147	9.34096	2.25e-07	5.06e-07	-313740	Positive	protein_coding	-197	Promoter non-target gene eQTMs
ENSG00000084652	cg04680037	TXLNA	chr1	-10.2811	1.9694	0.00306978	0.00453334	-785207	Positive	protein_coding	-197	Promoter non-target gene eQTMs
ENSG00000143147	cg25099403	GPR161	chr1	5.29245	1.19703	0.00888955	0.0123848	-858868	Positive	protein_coding	-163	Promoter non-target gene eQTMs
ENSG00000142655	cg21180178	PEX14	chr1	-37.4063	4.05607	2.53e-10	7.44e-10	439336	Negative	protein_coding	-120	Promoter non-target gene eQTMs
ENSG00000187017	cg00069017	ESPN	chr1	104.215	6.19987	5.12e-28	9.25e-27	433196	Positive	protein_coding	-114	Promoter non-target gene eQTMs
ENSG00000185519	cg00075019	FAM131C	chr1	-6.93624	0.698928	8.83e-09	2.26e-08	179500	Positive	protein_coding	-107	Promoter non-target gene eQTMs
ENSG00000117122	cg00075019	MFAP2	chr1	-6.76981	0.883216	2.91e-06	5.86e-06	-737233	Positive	protein_coding	-107	Promoter non-target gene eQTMs
ENSG00000076864	cg11987090	RAP1GAP	chr1	-91.9089	7.01444	5.9e-19	4.02e-18	855734	Negative	protein_coding	-98	Promoter non-target gene eQTMs
ENSG00000125944	cg11987090	HNRNPR	chr1	23.1897	4.82949	0.00395417	0.00575952	-851822	Negative	protein_coding	-98	Promoter non-target gene eQTMs
ENSG00000134375	cg05923618	TIMM17A	chr1	-12.7282	0.814067	9.75e-25	1.23e-23	931729	Negative	protein_coding	-74	Promoter non-target gene eQTMs
ENSG00000174307	cg05923618	PHLDA3	chr1	6.06223	0.547406	5.89e-13	2.22e-12	-440609	Positive	protein_coding	-74	Promoter non-target gene eQTMs
ENSG00000120341	cg03112680	SEC16B	chr1	3.16997	0.529622	2.96e-05	5.41e-05	170101	Positive	protein_coding	-73	Promoter non-target gene eQTMs
ENSG00000116809	cg22391883	ZBTB17	chr1	-10.2464	0.602831	1.65e-27	2.85e-26	295363	Positive	protein_coding	-70	Promoter non-target gene eQTMs
ENSG00000159363	cg22391883	ATP13A2	chr1	-60.7914	4.07859	6.51e-23	6.75e-22	-748726	Positive	protein_coding	-70	Promoter non-target gene eQTMs
ENSG00000224167	cg18848478	RP3-522D1.1	chr1	1.52584	0.18275	8.46e-09	2.17e-08	-540980	Positive	lincRNA	-52	Promoter non-target gene eQTMs
ENSG00000249087	cg15741766	ZNF436-AS1	chr1	-3.51969	0.23897	8.18e-24	9.35e-23	-590154	Negative	antisense	-42	Promoter non-target gene eQTMs
ENSG00000220785	cg10307600	MTMR9LP	chr1	-0.905252	0.115978	1.03e-07	2.39e-07	733055	Negative	transcribed_unprocessed_pseudogene	-28	Promoter non-target gene eQTMs
ENSG00000159176	cg27313021	CSRP1	chr1	-22.1431	2.843	9.03e-07	1.91e-06	639337	Negative	protein_coding	-9	Promoter non-target gene eQTMs
ENSG00000270882	cg17675141	HIST2H4A	chr1	-4.76347	0.624645	8.63e-08	2.02e-07	-403474	Negative	protein_coding	23	Promoter non-target gene eQTMs
ENSG00000116962	cg07102302	NID1	chr1	-2.64095	0.407741	1.65e-05	3.09e-05	166638	Positive	protein_coding	37	Promoter non-target gene eQTMs
ENSG00000162702	cg07148880	ZNF281	chr1	5.56003	0.801636	1.34e-06	2.79e-06	618720	Positive	protein_coding	40	Promoter non-target gene eQTMs
ENSG00000177674	cg17944110	AGTRAP	chr1	2.42528	0.370685	7.81e-06	1.51e-05	939484	Negative	protein_coding	50	Promoter non-target gene eQTMs
ENSG00000198492	cg19901472	YTHDF2	chr1	10.7575	1.29869	4.26e-09	1.13e-08	-494246	Negative	protein_coding	75	Promoter non-target gene eQTMs
ENSG00000116191	cg12595163	RALGPS2	chr1	-50.8524	4.01721	3.52e-19	2.46e-18	-300552	Positive	protein_coding	105	Promoter non-target gene eQTMs
ENSG00000135837	cg12595163	CEP350	chr1	-25.4205	2.16542	2.1e-17	1.23e-16	929074	Positive	protein_coding	105	Promoter non-target gene eQTMs
ENSG00000132702	cg19398794	HAPLN2	chr1	-0.689115	0.0681305	1.67e-08	4.17e-08	537439	Positive	protein_coding	106	Promoter non-target gene eQTMs
ENSG00000084070	cg02998018	SMAP2	chr1	-12.4523	1.72312	8.12e-08	1.9e-07	304740	Negative	protein_coding	123	Promoter non-target gene eQTMs
ENSG00000277726	cg19955419	RP4-635E18.9	chr1	-1.88671	0.100403	4.07e-30	9.29e-29	801985	Negative	protein_coding	128	Promoter non-target gene eQTMs
ENSG00000142599	cg10009930	RERE	chr1	-48.0302	4.79034	3.39e-12	1.19e-11	1186947	Positive	protein_coding	138	Promoter non-target gene eQTMs
ENSG00000198483	cg19930199	ANKRD35	chr1	3.12353	0.420307	4.31e-07	9.43e-07	91294	Positive	protein_coding	147	Promoter non-target gene eQTMs
ENSG00000131788	cg19930199	PIAS3	chr1	-6.16095	1.35943	0.00254032	0.00378871	109332	Negative	protein_coding	147	Promoter non-target gene eQTMs
ENSG00000180869	cg26342398	LINC01555	chr1	-0.431494	0.0431771	3.24e-12	1.14e-11	62413	Negative	lincRNA	160	Promoter non-target gene eQTMs
ENSG00000163125	cg09726469	RPRD2	chr1	25.7599	4.16638	5.05e-05	9.01e-05	-216447	Positive	protein_coding	200	Promoter non-target gene eQTMs
ENSG00000189266	cg15729771	PNRC2	chr1	40.4048	6.13007	7.59e-06	1.47e-05	-788286	Positive	protein_coding	232	Promoter non-target gene eQTMs
ENSG00000155367	cg00502533	PPM1J	chr1	-5.41678	0.96023	0.00017744	0.00029929	246145	Negative	protein_coding	276	Promoter non-target gene eQTMs
ENSG00000186094	cg23226852	AGBL4	chr1	2.38181	0.249857	1.85e-12	6.65e-12	2427126	Positive	protein_coding	283	Promoter non-target gene eQTMs
ENSG00000142676	cg18921123	RPL11	chr1	-54.2859	5.38535	7.71e-13	2.88e-12	-288748	Negative	protein_coding	437	Promoter non-target gene eQTMs
ENSG00000132716	cg13109911	DCAF8	chr1	-38.4778	2.92217	1.02e-19	7.54e-19	-7295	Negative	protein_coding	449	Promoter non-target gene eQTMs
ENSG00000265241	cg05598845	RBM8A	chr1	11.06	2.15756	0.00034108	0.0005597	39837	Positive	protein_coding	450	Promoter non-target gene eQTMs
ENSG00000163531	cg01111494	NFASC	chr1	-80.3087	8.45707	1.92e-11	6.27e-11	-399065	Positive	protein_coding	460	Promoter non-target gene eQTMs
ENSG00000197530	cg15042692	MIB2	chr1	-22.234	0.827659	5.67e-46	1.26e-43	307335	Positive	protein_coding	487	Promoter non-target gene eQTMs
ENSG00000224051	cg15042692	CPTP	chr1	-4.26356	0.161693	2.51e-45	4.64e-43	16676	Negative	protein_coding	487	Promoter non-target gene eQTMs
ENSG00000131591	cg15042692	C1orf159	chr1	-4.14987	0.196162	8.51e-36	4.1e-34	226262	Negative	protein_coding	487	Promoter non-target gene eQTMs
ENSG00000188157	cg15042692	AGRN	chr1	-14.0776	0.74679	1.09e-30	2.66e-29	-287960	Negative	protein_coding	487	Promoter non-target gene eQTMs
ENSG00000250575	cg15042692	RP4-669L17.8	chr1	-2.95875	0.190127	1.28e-22	1.28e-21	816855	Positive	unprocessed_pseudogene	487	Promoter non-target gene eQTMs
ENSG00000215790	cg15042692	SLC35E2	chr1	-18.3824	1.08111	7.82e-22	7.18e-21	-416758	Negative	protein_coding	487	Promoter non-target gene eQTMs
ENSG00000272455	cg15042692	RP4-758J18.13	chr1	1.15332	0.0848769	1.24e-19	9.1e-19	101016	Positive	lincRNA	487	Promoter non-target gene eQTMs
ENSG00000162441	cg09174674	LZIC	chr1	12.1813	0.585202	3.68e-37	2.13e-35	-98129	Positive	protein_coding	542	Promoter non-target gene eQTMs
ENSG00000275140	cg17149103	CH17-478G19.2	chr1	-2.41603	0.554921	0.00602826	0.0085905	-455276	Negative	unprocessed_pseudogene	649	Promoter non-target gene eQTMs
ENSG00000010072	cg07918814	SPRTN	chr1	1.81385	0.442457	0.0297677	0.038671	590369	Positive	protein_coding	649	Promoter non-target gene eQTMs
ENSG00000169914	cg05051464	OTUD3	chr1	-9.21986	0.72966	2.71e-18	1.74e-17	397567	Negative	protein_coding	711	Promoter non-target gene eQTMs
ENSG00000001460	cg01840215	STPG1	chr1	-14.1211	2.85849	0.00364411	0.00533132	-376850	Negative	protein_coding	778	Promoter non-target gene eQTMs
ENSG00000158747	cg14446565	NBL1	chr1	7.3937	0.890752	2.02e-09	5.5e-09	112415	Positive	protein_coding	975	Promoter non-target gene eQTMs
ENSG00000143443	cg13841804	C1orf56	chr1	-2.27157	0.148643	3.92e-22	3.73e-21	812621	Negative	protein_coding	1037	Promoter non-target gene eQTMs
ENSG00000143398	cg13841804	PIP5K1A	chr1	12.5328	1.47015	3e-10	8.77e-10	962830	Positive	protein_coding	1037	Promoter non-target gene eQTMs
ENSG00000175279	cg12035827	APITD1	chr1	-0.867192	0.0960301	1.78e-10	5.31e-10	-364736	Negative	protein_coding	1481	Promoter non-target gene eQTMs
ENSG00000117305	cg00404049	HMGCL	chr1	-1.90745	0.362444	0.00137025	0.00210471	177123	Negative	protein_coding	1919	Promoter non-target gene eQTMs
ENSG00000116194	cg10785394	ANGPTL1	chr1	2.64494	0.600905	0.0117194	0.0160674	174336	Positive	protein_coding	1933	Promoter non-target gene eQTMs
ENSG00000261168	cg03541057	RP11-68I18.10	chr1	-0.584664	0.0743656	3.42e-08	8.3e-08	-896178	Negative	sense_overlapping	2259	Promoter non-target gene eQTMs
ENSG00000160049	cg08108188	DFFA	chr1	16.1223	1.64046	1.07e-11	3.59e-11	337339	Positive	protein_coding	-321573	Distal non-target gene eQTMs
ENSG00000171824	cg19178679	EXOSC10	chr1	-18.9152	1.5209	4.45e-18	2.77e-17	-273267	Negative	protein_coding	-321063	Distal non-target gene eQTMs
ENSG00000054523	cg19178679	KIF1B	chr1	-125.677	15.2558	5.85e-10	1.67e-09	-582546	Negative	protein_coding	-321063	Distal non-target gene eQTMs
ENSG00000174574	cg16181943	AKIRIN1	chr1	-5.42163	0.585192	1.55e-11	5.1e-11	-404237	Negative	protein_coding	-314197	Distal non-target gene eQTMs
ENSG00000116906	cg24073755	GNPAT	chr1	5.06681	0.415444	7.26e-17	4.01e-16	-578480	Positive	protein_coding	-291034	Distal non-target gene eQTMs
ENSG00000117410	cg04563783	ATP6V0B	chr1	15.5877	2.83809	0.00034256	0.00056198	22591	Positive	protein_coding	-246072	Distal non-target gene eQTMs
ENSG00000226849	cg05390356	RP4-635E18.7	chr1	-0.185846	0.0285177	8.64e-06	1.67e-05	850546	Negative	antisense	-185093	Distal non-target gene eQTMs
ENSG00000055070	cg18117094	SZRD1	chr1	-15.1653	1.04835	8.35e-23	8.53e-22	-561319	Negative	protein_coding	-173621	Distal non-target gene eQTMs
ENSG00000268869	cg18117094	ESPNP	chr1	-1.37636	0.150862	1.07e-08	2.72e-08	226555	Negative	transcribed_unprocessed_pseudogene	-173621	Distal non-target gene eQTMs
ENSG00000228526	cg06758477	MIR34A	chr1	-1.48839	0.263192	0.00416826	0.00605631	1032702	Negative	lincRNA	-147881	Distal non-target gene eQTMs
ENSG00000143702	cg05090186	CEP170	chr1	-7.35779	1.02532	4.46e-07	9.75e-07	927713	Negative	protein_coding	-134739	Distal non-target gene eQTMs
ENSG00000142583	cg09146155	SLC2A5	chr1	-2.48162	0.449449	0.00552004	0.0079015	851182	Positive	protein_coding	-105467	Distal non-target gene eQTMs
ENSG00000162946	cg17142856	DISC1	chr1	43.9041	3.7016	1.17e-16	6.33e-16	204644	Positive	protein_coding	-85067	Distal non-target gene eQTMs
ENSG00000235363	cg09085216	SNRPGP10	chr1	-0.38267	0.0239863	7.94e-24	9.09e-23	991294	Positive	processed_pseudogene	-82948	Distal non-target gene eQTMs
ENSG00000133069	cg09085216	TMCC2	chr1	18.5831	1.53528	3.28e-17	1.87e-16	867993	Negative	protein_coding	-82948	Distal non-target gene eQTMs
ENSG00000236200	cg08959526	KDM4A-AS1	chr1	-3.65924	0.645297	0.00129151	0.00198934	85200	Negative	antisense	-64499	Distal non-target gene eQTMs
ENSG00000169504	cg15414417	CLIC4	chr1	53.9981	8.40159	9.59e-05	0.00016653	722457	Positive	protein_coding	-63816	Distal non-target gene eQTMs
ENSG00000135778	cg00278134	NTPCR	chr1	-3.06191	0.347597	8.56e-11	2.63e-10	325341	Negative	protein_coding	-63706	Distal non-target gene eQTMs
ENSG00000164008	cg02508525	C1orf50	chr1	1.57286	0.151425	1.41e-13	5.63e-13	-996474	Positive	protein_coding	-57899	Distal non-target gene eQTMs
ENSG00000053372	cg00925509	MRTO4	chr1	2.78011	0.264072	2.74e-14	1.18e-13	-229357	Positive	protein_coding	-56778	Distal non-target gene eQTMs
ENSG00000272084	cg27647503	RP5-1126H10.2	chr1	-0.538499	0.0852299	1.73e-05	3.24e-05	396648	Negative	3prime_overlapping_ncRNA	-44374	Distal non-target gene eQTMs
ENSG00000142798	cg06912792	HSPG2	chr1	3.98649	0.402825	1.08e-06	2.27e-06	267998	Negative	protein_coding	-37615	Distal non-target gene eQTMs
ENSG00000186715	cg16466254	MST1L	chr1	-1.96335	0.341082	0.00014322	0.00024352	329246	Negative	transcribed_unprocessed_pseudogene	-29986	Distal non-target gene eQTMs
ENSG00000280114	cg13770924	RP5-875O13.7	chr1	1.48718	0.315417	0.00902364	0.0125596	402366	Positive	unprocessed_pseudogene	-29293	Distal non-target gene eQTMs
ENSG00000162426	cg19060601	SLC45A1	chr1	3.00755	0.205203	1.02e-23	1.16e-22	-208118	Negative	protein_coding	-14025	Distal non-target gene eQTMs
ENSG00000153363	cg25768273	LINC00467	chr1	-1.21275	0.29818	0.0281858	0.03677	-355501	Negative	lincRNA	-12835	Distal non-target gene eQTMs
ENSG00000135744	cg03525122	AGT	chr1	12.1652	1.53126	1.25e-08	3.16e-08	-634487	Positive	protein_coding	-10046	Distal non-target gene eQTMs
ENSG00000143013	cg20461704	LMO4	chr1	7.5457	0.964272	1.97e-09	5.37e-09	615279	Positive	protein_coding	-9139	Distal non-target gene eQTMs
ENSG00000162430	cg20385686	SEPN1	chr1	44.9618	3.83767	1.42e-12	5.16e-12	-897784	Positive	protein_coding	-4724	Distal non-target gene eQTMs
ENSG00000188783	cg21421634	PRELP	chr1	137.186	11.632	1.46e-13	5.83e-13	-804743	Negative	protein_coding	-3544	Distal non-target gene eQTMs
ENSG00000170382	cg21421634	LRRN2	chr1	10.618	1.00916	7.31e-12	2.48e-11	-336621	Positive	protein_coding	-3544	Distal non-target gene eQTMs
ENSG00000133056	cg21421634	PIK3C2B	chr1	6.17337	0.691186	2.47e-10	7.27e-10	-142079	Positive	protein_coding	-3544	Distal non-target gene eQTMs
ENSG00000117013	cg14182166	KCNQ4	chr1	-6.81188	0.694566	1.17e-10	3.55e-10	740891	Negative	protein_coding	-2663	Distal non-target gene eQTMs
ENSG00000197587	cg05162791	DMBX1	chr1	-0.703726	0.117661	0.00012405	0.00021245	206521	Negative	protein_coding	3133	Distal non-target gene eQTMs
ENSG00000160752	cg10445911	FDPS	chr1	-8.91867	1.18235	1.07e-05	2.04e-05	309302	Positive	protein_coding	3184	Distal non-target gene eQTMs
ENSG00000203685	cg02033788	STUM	chr1	-6.47952	0.845137	2.15e-07	4.84e-07	426357	Negative	protein_coding	4771	Distal non-target gene eQTMs
ENSG00000275678	cg12312765	RP4-547N15.3	chr1	0.707949	0.0953118	1.27e-07	2.92e-07	-593731	Positive	sense_intronic	5509	Distal non-target gene eQTMs
ENSG00000143674	cg11908002	RP5-862P8.2	chr1	-0.861896	0.212706	0.0302852	0.0393161	810935	Negative	protein_coding	44769	Distal non-target gene eQTMs
ENSG00000270035	cg15977292	RP11-338N10.2	chr1	2.38692	0.514953	0.0140707	0.0190797	970095	Positive	lincRNA	82032	Distal non-target gene eQTMs
ENSG00000223820	cg19358349	CFL1P1	chr10	0.598309	0.130166	0.00662068	0.00937996	-44186	Positive	transcribed_unprocessed_pseudogene	-44186	Distal target gene eQTMs
ENSG00000138138	cg18141918	ATAD1	chr10	-15.2977	2.05781	5.19e-08	1.24e-07	111270	Negative	protein_coding	-21439	Distal target gene eQTMs
ENSG00000273001	cg14330737	RP11-118K6.3	chr10	-0.901046	0.193574	0.00550098	0.00787807	15864	Negative	lincRNA	-15287	Distal target gene eQTMs
ENSG00000165655	cg19271099	ZNF503	chr10	3.88975	0.163065	2.52e-41	2.46e-39	5163	Positive	protein_coding	-1087	Promoter-eQTMs
ENSG00000271335	cg04781305	RP11-324I22.4	chr10	-0.580296	0.108993	0.00036591	0.00059855	20949	Negative	antisense	900	Promoter-eQTMs
ENSG00000120594	cg07534516	PLXDC2	chr10	-38.4414	6.94806	0.00012373	0.00021197	1044	Negative	protein_coding	1044	Promoter-eQTMs
ENSG00000237149	cg17211261	ZNF503-AS2	chr10	0.591196	0.0858593	9.28e-07	1.96e-06	1289	Positive	antisense	1289	Promoter-eQTMs
ENSG00000059915	cg17773020	PSD	chr10	60.3241	5.40131	9.91e-17	5.41e-16	16296	Negative	protein_coding	2626	Distal target gene eQTMs
ENSG00000107874	cg17773020	CUEDC2	chr10	6.49129	0.686205	3.97e-12	1.38e-11	-4332	Positive	protein_coding	13748	Distal target gene eQTMs
ENSG00000148660	cg26054828	CAMK2G	chr10	-17.7752	1.51042	1.03e-17	6.23e-17	47241	Negative	protein_coding	14849	Distal target gene eQTMs
ENSG00000165322	cg02093006	ARHGAP12	chr10	-26.1373	2.66866	5.61e-12	1.92e-11	107610	Negative	protein_coding	15862	Distal target gene eQTMs
ENSG00000175029	cg00499954	CTBP2	chr10	31.171	4.20751	6.77e-07	1.45e-06	143869	Positive	protein_coding	32984	Distal target gene eQTMs
ENSG00000198964	cg17569303	SGMS1	chr10	-9.121	0.918574	3.32e-12	1.16e-11	245605	Negative	protein_coding	73972	Distal target gene eQTMs
ENSG00000156671	cg22454401	SAMD8	chr10	-17.0415	3.09799	0.00014562	0.00024736	-303296	Positive	protein_coding	-1636	Promoter non-target gene eQTMs
ENSG00000107862	cg08065637	GBF1	chr10	47.2964	10.3007	0.00907261	0.0126238	-175004	Positive	protein_coding	-1347	Promoter non-target gene eQTMs
ENSG00000171160	cg06636246	MORN4	chr10	5.76309	0.575551	6.36e-13	2.4e-12	-781063	Positive	protein_coding	-1230	Promoter non-target gene eQTMs
ENSG00000165644	cg16221975	COMTD1	chr10	1.78025	0.103308	9.08e-30	1.98e-28	-133381	Positive	protein_coding	-1002	Promoter non-target gene eQTMs
ENSG00000165637	cg16221975	VDAC2	chr10	-31.4177	2.3269	1.52e-21	1.35e-20	109566	Positive	protein_coding	-1002	Promoter non-target gene eQTMs
ENSG00000237399	cg23782734	PITRM1-AS1	chr10	-1.33182	0.249565	0.00214201	0.00322365	74783	Negative	antisense	-848	Promoter non-target gene eQTMs
ENSG00000148700	cg08533748	ADD3	chr10	72.1697	7.43855	1.1e-11	3.68e-11	-876038	Positive	protein_coding	-611	Promoter non-target gene eQTMs
ENSG00000119953	cg08533748	SMNDC1	chr10	8.88685	0.967905	3.4e-09	9.07e-09	581676	Negative	protein_coding	-611	Promoter non-target gene eQTMs
ENSG00000107521	cg12067979	HPS1	chr10	-12.9706	1.21664	1.76e-14	7.71e-14	-775000	Negative	protein_coding	-512	Promoter non-target gene eQTMs
ENSG00000223482	cg06466203	NUTM2A-AS1	chr10	-15.1282	0.737173	2.83e-34	1.12e-32	661956	Negative	antisense	-490	Promoter non-target gene eQTMs
ENSG00000173267	cg18665732	SNCG	chr10	-35.2142	3.8375	5.37e-10	1.53e-09	-904997	Negative	protein_coding	-483	Promoter non-target gene eQTMs
ENSG00000278601	cg13244260	RP11-348N5.9	chr10	0.973419	0.215302	0.0106772	0.0147259	35214	Positive	antisense	-474	Promoter non-target gene eQTMs
ENSG00000173269	cg03891929	MMRN2	chr10	-3.59902	0.546414	3.73e-05	6.75e-05	928044	Negative	protein_coding	-471	Promoter non-target gene eQTMs
ENSG00000119946	cg27096759	CNNM1	chr10	8.30179	0.832636	6.38e-12	2.18e-11	-680977	Positive	protein_coding	-414	Promoter non-target gene eQTMs
ENSG00000107789	cg17776353	MINPP1	chr10	4.50248	0.532235	3.1e-09	8.31e-09	748212	Positive	protein_coding	-365	Promoter non-target gene eQTMs
ENSG00000151151	cg13686115	IPMK	chr10	-14.725	3.21952	0.00369205	0.00539653	985349	Negative	protein_coding	-276	Promoter non-target gene eQTMs
ENSG00000185532	cg00620035	PRKG1	chr10	-8.95391	1.85943	0.00279966	0.0041561	365681	Negative	protein_coding	-256	Promoter non-target gene eQTMs
ENSG00000169740	cg18151993	ZNF32	chr10	-6.37139	0.498723	1.06e-19	7.82e-19	-234447	Positive	protein_coding	-247	Promoter non-target gene eQTMs
ENSG00000165660	cg22557350	FAM175B	chr10	3.03738	0.301774	1.7e-13	6.75e-13	57405	Positive	protein_coding	-145	Promoter non-target gene eQTMs
ENSG00000138175	cg00624332	ARL3	chr10	-70.8678	9.60225	1.44e-07	3.29e-07	-553137	Positive	protein_coding	-141	Promoter non-target gene eQTMs
ENSG00000166189	cg16819381	HPS6	chr10	-2.80031	0.223038	1.46e-17	8.67e-17	754292	Negative	protein_coding	-80	Promoter non-target gene eQTMs
ENSG00000204177	cg20036869	BMS1P1	chr10	5.43339	1.14348	0.00105185	0.00163842	-597634	Positive	transcribed_unprocessed_pseudogene	-35	Promoter non-target gene eQTMs
ENSG00000277758	cg27067269	ABC7-42404400C24.1	chr10	1.07551	0.146732	6.5e-08	1.54e-07	-366573	Positive	protein_coding	-18	Promoter non-target gene eQTMs
ENSG00000138279	cg27046659	ANXA7	chr10	-6.95846	0.656195	5.59e-14	2.33e-13	499493	Positive	protein_coding	-3	Promoter non-target gene eQTMs
ENSG00000107736	cg14767877	CDH23	chr10	-140.011	12.5666	1.57e-13	6.25e-13	-454382	Negative	protein_coding	59	Promoter non-target gene eQTMs
ENSG00000122863	cg14767877	CHST3	chr10	-4.94287	0.887613	0.00045892	0.0007433	113079	Negative	protein_coding	59	Promoter non-target gene eQTMs
ENSG00000148719	cg14105794	DNAJB12	chr10	-11.6193	1.18011	1.11e-12	4.09e-12	-481520	Negative	protein_coding	65	Promoter non-target gene eQTMs
ENSG00000148602	cg11591516	LRIT1	chr10	6.74397	1.12136	1.06e-05	2.03e-05	-37033	Positive	protein_coding	75	Promoter non-target gene eQTMs
ENSG00000107829	cg17773020	FBXW4	chr10	15.4111	1.08899	4.06e-19	2.81e-18	808249	Positive	protein_coding	276	Promoter non-target gene eQTMs
ENSG00000148840	cg17773020	PPRC1	chr10	2.49887	0.368332	1.93e-06	3.96e-06	-285919	Negative	protein_coding	276	Promoter non-target gene eQTMs
ENSG00000224914	cg27299538	LINC00863	chr10	5.92242	0.334134	3.79e-30	8.68e-29	-521089	Positive	lincRNA	339	Promoter non-target gene eQTMs
ENSG00000170324	cg15179825	FRMPD2	chr10	-36.7186	3.73233	1.91e-11	6.24e-11	-853095	Negative	protein_coding	393	Promoter non-target gene eQTMs
ENSG00000171311	cg17158083	EXOSC1	chr10	-2.12329	0.192817	2.94e-14	1.26e-13	196864	Positive	protein_coding	494	Promoter non-target gene eQTMs
ENSG00000171314	cg17158083	PGAM1	chr10	-86.5015	8.76138	1.24e-12	4.54e-12	-206815	Negative	protein_coding	494	Promoter non-target gene eQTMs
ENSG00000269609	cg25355065	RPARP-AS1	chr10	-5.63834	0.833932	2.99e-06	6.01e-06	-264056	Negative	processed_transcript	535	Promoter non-target gene eQTMs
ENSG00000151303	cg07655693	RP11-96C23.13	chr10	-0.883895	0.164772	0.0007348	0.00116406	-869976	Negative	processed_transcript	731	Promoter non-target gene eQTMs
ENSG00000107742	cg08388111	SPOCK2	chr10	77.9649	7.0884	3.79e-14	1.6e-13	214028	Positive	protein_coding	858	Promoter non-target gene eQTMs
ENSG00000107902	cg09493327	LHPP	chr10	3.01144	0.349802	2.69e-10	7.89e-10	-697711	Positive	protein_coding	1636	Promoter non-target gene eQTMs
ENSG00000108055	cg21165870	SMC3	chr10	-21.9867	4.55017	0.00339416	0.00498766	-300412	Positive	protein_coding	1640	Promoter non-target gene eQTMs
ENSG00000214413	cg25341032	BBIP1	chr10	-14.8219	1.14961	1.06e-19	7.82e-19	-892437	Negative	protein_coding	2090	Promoter non-target gene eQTMs
ENSG00000270589	cg25341032	RP11-348N5.7	chr10	-1.18327	0.211904	0.00074142	0.00117413	904305	Negative	antisense	2090	Promoter non-target gene eQTMs
ENSG00000234420	cg12891252	ZNF37BP	chr10	-8.04164	0.889491	5.68e-11	1.77e-10	893542	Negative	transcribed_processed_pseudogene	2114	Promoter non-target gene eQTMs
ENSG00000178440	cg24199987	LINC00843	chr10	2.62842	0.12903	5.67e-36	2.81e-34	-680402	Positive	lincRNA	2493	Promoter non-target gene eQTMs
ENSG00000213667	cg24199987	PGGT1BP1	chr10	-0.760517	0.114384	1.07e-05	2.04e-05	-104489	Negative	processed_pseudogene	2493	Promoter non-target gene eQTMs
ENSG00000133678	cg15734357	TMEM254	chr10	-5.04554	0.538862	1.87e-12	6.71e-12	858210	Positive	protein_coding	-151401	Distal non-target gene eQTMs
ENSG00000188199	cg15734357	NUTM2B	chr10	1.23507	0.144866	3.79e-06	7.54e-06	482791	Positive	protein_coding	-151401	Distal non-target gene eQTMs
ENSG00000280355	cg15734357	RP11-119F19.5	chr10	-0.663442	0.121742	0.00023778	0.00039607	-461537	Negative	TEC	-151401	Distal non-target gene eQTMs
ENSG00000095794	cg20772106	CREM	chr10	-3.21716	0.528736	0.00044086	0.00071556	-238364	Negative	protein_coding	-118130	Distal non-target gene eQTMs
ENSG00000107938	cg26517376	EDRF1	chr10	7.07511	0.490547	5.65e-22	5.28e-21	979266	Positive	protein_coding	-116896	Distal non-target gene eQTMs
ENSG00000156374	cg13491644	PCGF6	chr10	-1.9174	0.344765	0.00044317	0.00071899	252285	Negative	protein_coding	-61102	Distal non-target gene eQTMs
ENSG00000203867	cg06069280	RBM20	chr10	-1.17415	0.144937	5.26e-09	1.38e-08	588368	Negative	protein_coding	-59600	Distal non-target gene eQTMs
ENSG00000282246	cg18050740	RP11-295P9.13	chr10	0.336262	0.0444026	5.37e-07	1.16e-06	493972	Positive	protein_coding	-57399	Distal non-target gene eQTMs
ENSG00000099284	cg12329405	H2AFY2	chr10	-2.62895	0.17019	1.41e-23	1.58e-22	734230	Negative	protein_coding	-48632	Distal non-target gene eQTMs
ENSG00000060339	cg12329405	CCAR1	chr10	15.6679	1.17722	1.23e-20	9.99e-20	-597604	Negative	protein_coding	-48632	Distal non-target gene eQTMs
ENSG00000107625	cg12329405	DDX50	chr10	7.61639	0.800128	1.28e-11	4.25e-11	-417330	Positive	protein_coding	-48632	Distal non-target gene eQTMs
ENSG00000188611	cg26068349	ASAH2	chr10	-10.8674	2.32295	0.00379758	0.0055411	420811	Negative	protein_coding	-12877	Distal non-target gene eQTMs
ENSG00000165632	cg10588818	TAF3	chr10	3.161	0.234367	3.81e-21	3.23e-20	409637	Negative	protein_coding	2618	Distal non-target gene eQTMs
ENSG00000243660	cg27641141	ZNF487	chr10	-2.05794	0.164873	5.48e-19	3.75e-18	39379	Negative	protein_coding	11704	Distal non-target gene eQTMs
ENSG00000198018	cg02987555	ENTPD7	chr10	1.9005	0.211966	6.71e-10	1.9e-09	-337786	Positive	protein_coding	12624	Distal non-target gene eQTMs
ENSG00000035403	cg26054828	VCL	chr10	-14.8407	1.18777	6.76e-15	3.08e-14	135451	Positive	protein_coding	14849	Distal non-target gene eQTMs
ENSG00000224023	cg16110504	FLJ37035	chr10	-0.856876	0.199101	0.0161004	0.0216648	-575227	Negative	lincRNA	35961	Distal non-target gene eQTMs
ENSG00000197444	cg16339541	OGDHL	chr10	-12.7078	1.71881	2.06e-07	4.65e-07	806458	Positive	protein_coding	49613	Distal non-target gene eQTMs
ENSG00000165338	cg05062679	HECTD2	chr10	8.09362	0.708224	1.03e-14	4.61e-14	-831149	Positive	protein_coding	50658	Distal non-target gene eQTMs
ENSG00000198060	cg05062679	MARCHF5	chr10	4.8845	0.566519	4.54e-09	1.2e-08	50738	Positive	protein_coding	50658	Distal non-target gene eQTMs
ENSG00000180628	cg05062679	PCGF5	chr10	8.55973	2.09006	0.0248548	0.0326548	-1077417	Positive	protein_coding	50658	Distal non-target gene eQTMs
ENSG00000256269	cg16169193	HMBS	chr11	-5.47811	1.09206	0.00190922	0.00288841	-2418	Negative	protein_coding	-2418	Promoter-eQTMs
ENSG00000149328	cg00430080	GLB1L2	chr11	-201.177	28.3438	9.37e-07	1.98e-06	-765	Negative	protein_coding	-765	Promoter-eQTMs
ENSG00000254477	cg06124782	AP000640.10	chr11	-0.424036	0.06476	8.42e-06	1.63e-05	2431	Negative	antisense	-34	Promoter-eQTMs
ENSG00000167995	cg15456821	BEST1	chr11	-12.2653	1.26656	1.29e-11	4.28e-11	310	Negative	protein_coding	68	Promoter-eQTMs
ENSG00000110436	cg24190415	SLC1A2	chr11	117.178	17.7911	4.4e-06	8.71e-06	168260	Positive	protein_coding	598	Promoter-eQTMs
ENSG00000110721	cg10764405	CHKA	chr11	12.3583	0.927535	2.72e-20	2.13e-19	67959	Positive	protein_coding	626	Promoter-eQTMs
ENSG00000162194	cg26363414	LBHD1	chr11	-30.8191	3.23536	1.11e-11	3.71e-11	8368	Negative	protein_coding	1070	Promoter-eQTMs
ENSG00000172757	cg20909159	CFL1	chr11	38.8316	4.15708	2.78e-10	8.15e-10	35454	Positive	protein_coding	3550	Distal target gene eQTMs
ENSG00000167987	cg26241240	VPS37C	chr11	-19.2446	3.29923	0.00042787	0.00069565	-4068	Negative	protein_coding	35428	Distal target gene eQTMs
ENSG00000186166	cg16169193	CCDC84	chr11	-10.6177	2.17527	0.015044	0.0203211	-89146	Negative	protein_coding	-2418	Promoter non-target gene eQTMs
ENSG00000173227	cg24357714	SYT12	chr11	1.01919	0.150192	5.88e-05	0.00010423	-501891	Positive	protein_coding	-2406	Promoter non-target gene eQTMs
ENSG00000255468	cg04073608	RP11-867G23.8	chr11	1.26485	0.0539781	1.04e-37	6.57e-36	847321	Positive	antisense	-2224	Promoter non-target gene eQTMs
ENSG00000229183	cg01595554	PGA4	chr11	0.17267	0.0321732	0.0113212	0.0155615	-729729	Positive	protein_coding	-2124	Promoter non-target gene eQTMs
ENSG00000174516	cg16838301	PELI3	chr11	-8.53	0.596931	2.06e-22	2.02e-21	-150639	Negative	protein_coding	-1876	Promoter non-target gene eQTMs
ENSG00000126500	cg02149740	FLRT1	chr11	9.01241	0.499616	2.41e-29	5.02e-28	-83847	Positive	protein_coding	-1763	Promoter non-target gene eQTMs
ENSG00000068971	cg14395634	PPP2R5B	chr11	25.7889	2.44675	2.22e-13	8.74e-13	-941184	Positive	protein_coding	-1611	Promoter non-target gene eQTMs
ENSG00000176973	cg20909159	FAM89B	chr11	1.91814	0.255272	5.96e-07	1.28e-06	-286127	Positive	protein_coding	-1350	Promoter non-target gene eQTMs
ENSG00000255200	cg20909159	AP003068.18	chr11	-0.319554	0.042714	7.39e-07	1.58e-06	684359	Negative	transcribed_processed_pseudogene	-1350	Promoter non-target gene eQTMs
ENSG00000133895	cg18501142	MEN1	chr11	9.00128	0.555255	2e-26	3.06e-25	695580	Positive	protein_coding	-1328	Promoter non-target gene eQTMs
ENSG00000243742	cg06070311	RPLP0P2	chr11	3.81401	0.155356	2.96e-44	4.69e-42	689584	Positive	transcribed_processed_pseudogene	-989	Promoter non-target gene eQTMs
ENSG00000177363	cg00435526	LRRN4CL	chr11	0.841901	0.082065	1.67e-08	4.17e-08	-20521	Positive	protein_coding	-707	Promoter non-target gene eQTMs
ENSG00000068831	cg10181845	RASGRP2	chr11	-2.33403	0.246464	2.46e-09	6.64e-09	-540969	Negative	protein_coding	-670	Promoter non-target gene eQTMs
ENSG00000167257	cg13714403	RNF214	chr11	-4.90206	0.401559	8.39e-16	4.18e-15	133732	Positive	protein_coding	-456	Promoter non-target gene eQTMs
ENSG00000256514	cg20054027	AP003419.11	chr11	-1.82102	0.299818	9.19e-05	0.0001599	-508323	Negative	protein_coding	-414	Promoter non-target gene eQTMs
ENSG00000166793	cg18639052	YPEL4	chr11	1.60429	0.27253	0.00012618	0.00021599	23068	Positive	protein_coding	-408	Promoter non-target gene eQTMs
ENSG00000243930	cg25733613	RPS12P21	chr11	-1.58954	0.118836	1.35e-20	1.09e-19	451613	Negative	processed_pseudogene	-286	Promoter non-target gene eQTMs
ENSG00000172269	cg22958951	DPAGT1	chr11	-2.06747	0.296941	2.87e-06	5.78e-06	285424	Negative	protein_coding	-201	Promoter non-target gene eQTMs
ENSG00000180423	cg14080254	HARBI1	chr11	-0.604416	0.053074	3.81e-16	1.96e-15	97891	Negative	protein_coding	-137	Promoter non-target gene eQTMs
ENSG00000166801	cg16913508	FAM111A	chr11	11.1306	1.58877	3.26e-07	7.21e-07	-668140	Positive	protein_coding	-16	Promoter non-target gene eQTMs
ENSG00000229859	cg01370129	PGA3	chr11	-0.59875	0.116215	0.0213118	0.0282172	-764359	Negative	protein_coding	-6	Promoter non-target gene eQTMs
ENSG00000234857	cg23050254	HNRNPUL2-BSCL2	chr11	-40.6908	2.00189	2.19e-34	8.83e-33	-25100	Negative	protein_coding	3	Promoter non-target gene eQTMs
ENSG00000168002	cg23050254	POLR2G	chr11	9.84106	0.564572	7.11e-31	1.78e-29	96390	Negative	protein_coding	3	Promoter non-target gene eQTMs
ENSG00000246100	cg16476128	LINC00900	chr11	0.404585	0.0527322	3.23e-08	7.86e-08	-115340	Negative	lincRNA	14	Promoter non-target gene eQTMs
ENSG00000166106	cg09360321	ADAMTS15	chr11	0.680168	0.155677	0.0160262	0.0215733	379169	Positive	protein_coding	32	Promoter non-target gene eQTMs
ENSG00000132740	cg08928203	IGHMBP2	chr11	-6.24787	0.401847	5.52e-26	8.04e-25	782462	Negative	protein_coding	64	Promoter non-target gene eQTMs
ENSG00000149503	cg08462117	INCENP	chr11	-8.70621	0.516	3.76e-27	6.26e-26	-541113	Negative	protein_coding	67	Promoter non-target gene eQTMs
ENSG00000134780	cg08462117	DAGLA	chr11	-9.14342	0.5578	2.91e-26	4.37e-25	-984720	Negative	protein_coding	67	Promoter non-target gene eQTMs
ENSG00000162227	cg08462117	TAF6L	chr11	-3.89584	0.335423	1.94e-16	1.03e-15	106246	Positive	protein_coding	67	Promoter non-target gene eQTMs
ENSG00000149541	cg08462117	B3GAT3	chr11	-19.8745	1.76415	7.25e-16	3.64e-15	49815	Positive	protein_coding	67	Promoter non-target gene eQTMs
ENSG00000185085	cg08462117	INTS5	chr11	-4.69173	0.435046	8.93e-15	4.02e-14	18263	Negative	protein_coding	67	Promoter non-target gene eQTMs
ENSG00000134824	cg08462117	FADS2	chr11	-38.3707	4.1643	3.94e-11	1.25e-10	-872131	Negative	protein_coding	67	Promoter non-target gene eQTMs
ENSG00000214753	cg08462117	HNRNPUL2	chr11	23.8175	2.6628	9.94e-11	3.03e-10	-47519	Positive	protein_coding	67	Promoter non-target gene eQTMs
ENSG00000149016	cg08462117	TUT1	chr11	-6.19794	0.709463	9.64e-10	2.7e-09	90066	Negative	protein_coding	67	Promoter non-target gene eQTMs
ENSG00000149499	cg08462117	EML3	chr11	-27.7117	3.5202	7.72e-08	1.81e-07	62893	Negative	protein_coding	67	Promoter non-target gene eQTMs
ENSG00000172803	cg12498916	SNX32	chr11	1.54182	0.233771	0.00250264	0.00373663	336160	Positive	protein_coding	88	Promoter non-target gene eQTMs
ENSG00000173486	cg09300426	FKBP2	chr11	8.26772	0.581657	4.03e-22	3.82e-21	55857	Negative	protein_coding	126	Promoter non-target gene eQTMs
ENSG00000149532	cg23053918	CPSF7	chr11	12.0513	1.18612	9.46e-13	3.5e-12	-69588	Negative	protein_coding	157	Promoter non-target gene eQTMs
ENSG00000254462	cg18039855	TMX2-CTNND1	chr11	-0.387486	0.0380666	1.25e-11	4.16e-11	45125	Negative	protein_coding	267	Promoter non-target gene eQTMs
ENSG00000176485	cg26689116	PLA2G16	chr11	14.7249	2.74853	0.00293889	0.00434955	401110	Positive	protein_coding	302	Promoter non-target gene eQTMs
ENSG00000179431	cg23501962	FJX1	chr11	0.870563	0.0835489	5.81e-13	2.2e-12	199714	Positive	protein_coding	352	Promoter non-target gene eQTMs
ENSG00000255823	cg09210514	MTRNR2L8	chr11	73.2588	11.7949	0.00859201	0.0119969	-204845	Negative	protein_coding	662	Promoter non-target gene eQTMs
ENSG00000254427	cg16480966	RP11-430H10.1	chr11	-0.427028	0.08421	0.00235755	0.00353019	-764464	Negative	lincRNA	1343	Promoter non-target gene eQTMs
ENSG00000173933	cg20730587	RBM4	chr11	12.9639	2.92336	0.0307249	0.0398369	-581115	Positive	protein_coding	-100463	Distal non-target gene eQTMs
ENSG00000175348	cg05003666	TMEM9B	chr11	-15.8693	2.10032	3.07e-08	7.48e-08	-866032	Positive	protein_coding	-61926	Distal non-target gene eQTMs
ENSG00000137486	cg10144645	ARRB1	chr11	16.8559	1.07783	3.97e-21	3.36e-20	375719	Positive	protein_coding	-52645	Distal non-target gene eQTMs
ENSG00000149273	cg10144645	RPS3	chr11	-81.5333	7.0329	2.75e-17	1.59e-16	-236326	Negative	protein_coding	-52645	Distal non-target gene eQTMs
ENSG00000166407	cg25363151	LMO1	chr11	1.77504	0.115813	2.34e-23	2.54e-22	586577	Negative	protein_coding	-42108	Distal non-target gene eQTMs
ENSG00000134825	cg03807243	TMEM258	chr11	-4.8621	0.243822	1.71e-36	9.13e-35	-638485	Negative	protein_coding	-27621	Distal non-target gene eQTMs
ENSG00000198382	cg18110520	UVRAG	chr11	7.48444	1.37444	0.00042303	0.00068834	-1277410	Positive	protein_coding	-25688	Distal non-target gene eQTMs
ENSG00000110042	cg16368005	DTX4	chr11	10.4183	1.32809	4.14e-08	9.98e-08	-600644	Positive	protein_coding	-17099	Distal non-target gene eQTMs
ENSG00000158636	cg01569388	EMSY	chr11	15.1836	1.24174	6.29e-19	4.26e-18	852032	Negative	protein_coding	-9695	Distal non-target gene eQTMs
ENSG00000170743	cg00969147	SYT9	chr11	3.31788	0.45798	2.54e-07	5.67e-07	-787180	Positive	protein_coding	-9469	Distal non-target gene eQTMs
ENSG00000135365	cg02541565	PHF21A	chr11	-5.58247	1.04556	0.00158494	0.00242052	985002	Negative	protein_coding	4317	Distal non-target gene eQTMs
ENSG00000214063	cg16863718	TSPAN4	chr11	-3.56801	0.263224	6.39e-19	4.33e-18	-540512	Negative	protein_coding	6575	Distal non-target gene eQTMs
ENSG00000185522	cg16863718	LMNTD2	chr11	-0.849924	0.0579417	6.49e-16	3.27e-15	828474	Negative	protein_coding	6575	Distal non-target gene eQTMs
ENSG00000110395	cg02854536	CBL	chr11	-16.3786	1.25578	2.73e-19	1.93e-18	-150890	Negative	protein_coding	15540	Distal non-target gene eQTMs
ENSG00000149573	cg06133061	MPZL2	chr11	-1.62683	0.354985	0.0126109	0.0172119	-670714	Negative	protein_coding	29315	Distal non-target gene eQTMs
ENSG00000149357	cg13968946	LAMTOR1	chr11	-5.75911	1.2881	0.0178922	0.023902	294604	Positive	protein_coding	30217	Distal non-target gene eQTMs
ENSG00000109917	cg03388745	ZPR1	chr11	3.59752	0.453478	6.11e-09	1.59e-08	199158	Positive	protein_coding	42940	Distal non-target gene eQTMs
ENSG00000010292	cg19463247	NCAPD2	chr12	-9.23184	1.57399	0.009113	0.012672	-41938	Negative	protein_coding	-41938	Distal target gene eQTMs
ENSG00000060237	cg17895463	WNK1	chr12	-32.3165	4.75119	1.04e-06	2.19e-06	-27593	Negative	protein_coding	-27579	Distal target gene eQTMs
ENSG00000159335	cg24679411	PTMS	chr12	80.113	7.19322	2.28e-15	1.09e-14	-1506	Positive	protein_coding	-1506	Promoter-eQTMs
ENSG00000257594	cg00491607	GALNT4	chr12	-6.08852	0.672039	1.19e-11	3.97e-11	5560	Negative	protein_coding	-166	Promoter-eQTMs
ENSG00000170456	cg16649695	DENND5B	chr12	20.5525	2.78533	6.97e-08	1.64e-07	208722	Negative	protein_coding	149	Promoter-eQTMs
ENSG00000270344	cg20293906	RP11-734K2.4	chr12	-3.03309	0.22588	2.77e-21	2.39e-20	-383	Negative	antisense	677	Promoter-eQTMs
ENSG00000111737	cg00301864	RAB35	chr12	-6.29477	0.725019	3.16e-10	9.22e-10	21569	Positive	protein_coding	834	Promoter-eQTMs
ENSG00000175970	cg08036850	UNC119B	chr12	14.5184	0.86718	9.94e-29	1.96e-27	23384	Positive	protein_coding	23361	Distal target gene eQTMs
ENSG00000258199	cg05359066	RP11-977G19.5	chr12	-0.568354	0.0474385	4.13e-11	1.3e-10	-4097	Negative	sense_overlapping	32022	Distal target gene eQTMs
ENSG00000150990	cg26312059	DHX37	chr12	1.90919	0.0993963	5.92e-33	1.9e-31	-32812	Positive	protein_coding	75109	Distal target gene eQTMs
ENSG00000250510	cg24679411	GPR162	chr12	17.5252	1.77271	3.02e-11	9.66e-11	54602	Positive	protein_coding	-1506	Promoter non-target gene eQTMs
ENSG00000271327	cg16431687	RP11-1109F11.3	chr12	-0.58046	0.0635086	5.94e-12	2.03e-11	-158213	Negative	lincRNA	-1214	Promoter non-target gene eQTMs
ENSG00000111653	cg19720347	ING4	chr12	-3.08064	0.358646	2.76e-09	7.42e-09	264656	Negative	protein_coding	-1212	Promoter non-target gene eQTMs
ENSG00000139132	cg16649695	FGD4	chr12	36.7839	4.87791	3.3e-08	8.02e-08	808581	Positive	protein_coding	-1025	Promoter non-target gene eQTMs
ENSG00000139160	cg16649695	ETFBKMT	chr12	1.48675	0.285949	0.00051158	0.00082423	56212	Negative	protein_coding	-1025	Promoter non-target gene eQTMs
ENSG00000240771	cg20263444	ARHGEF25	chr12	12.2792	1.62727	4.59e-08	1.1e-07	521373	Positive	protein_coding	-744	Promoter non-target gene eQTMs
ENSG00000102189	cg14362201	EEA1	chr12	-10.626	1.76685	3.62e-05	6.56e-05	-626988	Positive	protein_coding	-735	Promoter non-target gene eQTMs
ENSG00000256537	cg13279675	SMIM10L1	chr12	11.8601	2.16716	0.00012735	0.00021789	958372	Negative	protein_coding	-392	Promoter non-target gene eQTMs
ENSG00000134291	cg00395210	TMEM106C	chr12	-30.1438	3.00486	9.67e-14	3.93e-13	-235113	Negative	protein_coding	-295	Promoter non-target gene eQTMs
ENSG00000256742	cg18052097	RP13-941N14.1	chr12	0.916069	0.120505	1.95e-07	4.41e-07	-220285	Positive	lincRNA	-280	Promoter non-target gene eQTMs
ENSG00000258302	cg20293906	RP11-981P6.1	chr12	-0.36297	0.0661172	0.00017778	0.00029983	36152	Negative	antisense	-171	Promoter non-target gene eQTMs
ENSG00000139436	cg09011608	GIT2	chr12	-7.73132	1.13607	2.24e-06	4.56e-06	-215474	Negative	protein_coding	-100	Promoter non-target gene eQTMs
ENSG00000139547	cg02329175	RDH16	chr12	-0.454174	0.070953	3.1e-05	5.66e-05	895387	Negative	protein_coding	-79	Promoter non-target gene eQTMs
ENSG00000240342	cg01070209	RPS2P5	chr12	9.23454	1.08034	3.95e-10	1.14e-09	-735442	Positive	processed_pseudogene	-31	Promoter non-target gene eQTMs
ENSG00000157782	cg20066120	CABP1	chr12	-15.5163	1.26713	1.3e-16	7e-16	523623	Negative	protein_coding	-22	Promoter non-target gene eQTMs
ENSG00000006831	cg08723793	ADIPOR2	chr12	-12.2887	1.67319	8.48e-07	1.8e-06	935988	Negative	protein_coding	7	Promoter non-target gene eQTMs
ENSG00000275778	cg05406791	PRH1-PRR4	chr12	1.0216	0.0826091	1.46e-18	9.58e-18	-122574	Positive	protein_coding	37	Promoter non-target gene eQTMs
ENSG00000135423	cg03326470	GLS2	chr12	-7.58644	0.882704	9.84e-10	2.76e-09	-154993	Negative	protein_coding	108	Promoter non-target gene eQTMs
ENSG00000086598	cg03434624	TMED2	chr12	13.1635	2.37664	0.00048245	0.00077919	688197	Positive	protein_coding	108	Promoter non-target gene eQTMs
ENSG00000139218	cg23767163	SCAF11	chr12	70.3851	5.69544	3e-18	1.91e-17	464367	Positive	protein_coding	181	Promoter non-target gene eQTMs
ENSG00000123353	cg16017677	ORMDL2	chr12	-1.27844	0.120253	5.21e-15	2.4e-14	-339812	Negative	protein_coding	308	Promoter non-target gene eQTMs
ENSG00000205323	cg13757735	SARNP	chr12	7.1939	0.507477	2.39e-20	1.88e-19	935325	Positive	protein_coding	620	Promoter non-target gene eQTMs
ENSG00000166987	cg13757735	MBD6	chr12	-48.0473	4.12426	1.79e-16	9.5e-16	832922	Positive	protein_coding	620	Promoter non-target gene eQTMs
ENSG00000257411	cg13757735	RP11-603J24.9	chr12	1.21486	0.14057	3.82e-10	1.11e-09	-586457	Positive	protein_coding	620	Promoter non-target gene eQTMs
ENSG00000176915	cg15844201	ANKLE2	chr12	-4.15572	0.616311	4.4e-06	8.71e-06	-269079	Negative	protein_coding	736	Promoter non-target gene eQTMs
ENSG00000139192	cg03460172	TAPBPL	chr12	2.18154	0.223846	7.44e-12	2.52e-11	-312891	Positive	protein_coding	935	Promoter non-target gene eQTMs
ENSG00000111678	cg25252598	C12orf57	chr12	8.74858	0.592457	7.87e-23	8.07e-22	410542	Negative	protein_coding	1062	Promoter non-target gene eQTMs
ENSG00000111671	cg25252598	SPSB2	chr12	1.65901	0.125517	1.33e-17	7.95e-17	-338499	Negative	protein_coding	1062	Promoter non-target gene eQTMs
ENSG00000176834	cg10934821	VSIG10	chr12	1.27314	0.224336	0.00044107	0.00071584	308250	Positive	protein_coding	1102	Promoter non-target gene eQTMs
ENSG00000196498	cg26312059	NCOR2	chr12	68.928	2.32734	3.51e-50	1.6e-47	589598	Positive	protein_coding	1534	Promoter non-target gene eQTMs
ENSG00000269997	cg26312059	RP11-214K3.21	chr12	-0.211487	0.0211097	1.24e-11	4.12e-11	947936	Negative	sense_intronic	1534	Promoter non-target gene eQTMs
ENSG00000176383	cg14256511	B3GNT4	chr12	-0.5358	0.124359	0.0304467	0.0395025	-659456	Negative	protein_coding	2198	Promoter non-target gene eQTMs
ENSG00000135452	cg27405484	TSPAN31	chr12	-8.69221	0.574628	5.59e-23	5.83e-22	-14674	Negative	protein_coding	2411	Promoter non-target gene eQTMs
ENSG00000139131	cg19540425	YARS2	chr12	-1.20198	0.12001	2.8e-14	1.2e-13	-224588	Negative	protein_coding	-396067	Distal non-target gene eQTMs
ENSG00000274105	cg19540425	RP11-278C7.3	chr12	-0.285243	0.0314612	2.72e-11	8.75e-11	-225267	Negative	sense_intronic	-396067	Distal non-target gene eQTMs
ENSG00000111450	cg10476468	STX2	chr12	-13.7626	1.06253	4.99e-19	3.42e-18	342792	Negative	protein_coding	-178485	Distal non-target gene eQTMs
ENSG00000177169	cg05341199	ULK1	chr12	-48.6824	6.28435	2.23e-07	5.01e-07	775787	Positive	protein_coding	-164928	Distal non-target gene eQTMs
ENSG00000118307	cg22791307	CASC1	chr12	-1.7912	0.168233	1.31e-15	6.42e-15	989124	Negative	protein_coding	-138384	Distal non-target gene eQTMs
ENSG00000198393	cg15473325	ZNF26	chr12	3.75121	0.447024	8.07e-08	1.89e-07	425864	Positive	protein_coding	-103341	Distal non-target gene eQTMs
ENSG00000139767	cg13099106	SRRM4	chr12	-34.5355	2.09874	1.62e-29	3.44e-28	-1105827	Negative	protein_coding	-97499	Distal non-target gene eQTMs
ENSG00000213144	cg00168205	RP11-64B16.2	chr12	-0.911163	0.206789	0.00865908	0.0120828	-892278	Negative	processed_pseudogene	-97259	Distal non-target gene eQTMs
ENSG00000130779	cg06004816	CLIP1	chr12	-17.4804	3.0931	0.0148074	0.020023	590157	Negative	protein_coding	-87262	Distal non-target gene eQTMs
ENSG00000178882	cg16878595	FAM101A	chr12	-2.44143	0.254882	0.00286953	0.00425299	-472373	Negative	protein_coding	-62233	Distal non-target gene eQTMs
ENSG00000060709	cg27547422	RIMBP2	chr12	-11.6106	1.44513	4.72e-08	1.13e-07	306912	Negative	protein_coding	-51678	Distal non-target gene eQTMs
ENSG00000261324	cg23291270	RP11-174G6.5	chr12	-4.34929	0.670741	1.1e-06	2.31e-06	951177	Positive	sense_overlapping	-41871	Distal non-target gene eQTMs
ENSG00000073060	cg21673010	SCARB1	chr12	29.8592	4.73273	2.85e-05	5.22e-05	164116	Positive	protein_coding	-39460	Distal non-target gene eQTMs
ENSG00000139364	cg17429587	TMEM132B	chr12	-3.12319	0.642795	0.0051285	0.0073759	766152	Negative	protein_coding	-37303	Distal non-target gene eQTMs
ENSG00000258017	cg20987850	RP11-386G11.10	chr12	0.527914	0.0985553	0.00548701	0.00785999	-87613	Positive	antisense	-26659	Distal non-target gene eQTMs
ENSG00000279233	cg15199476	RP11-158L12.4	chr12	-0.530173	0.0657922	6.6e-09	1.71e-08	729266	Negative	TEC	-25598	Distal non-target gene eQTMs
ENSG00000255966	cg06444189	RP5-940J5.3	chr12	-0.34976	0.0687067	0.00181225	0.0027514	312286	Negative	antisense	-16166	Distal non-target gene eQTMs
ENSG00000120820	cg22024295	GLT8D2	chr12	-0.671463	0.131581	0.0156082	0.0210428	145317	Negative	protein_coding	-9065	Distal non-target gene eQTMs
ENSG00000170515	cg11609545	PA2G4	chr12	7.33496	1.03335	1.85e-06	3.8e-06	-525871	Positive	protein_coding	6408	Distal non-target gene eQTMs
ENSG00000089220	cg03276353	PEBP1	chr12	24.275	3.51922	4.98e-07	1.08e-06	-223712	Positive	protein_coding	13109	Distal non-target gene eQTMs
ENSG00000197653	cg02142767	DNAH10	chr12	-0.947475	0.10818	8.16e-10	2.3e-09	-1101791	Negative	protein_coding	18689	Distal non-target gene eQTMs
ENSG00000132932	cg25803041	ATP8A2	chr13	28.5657	5.76578	0.00153691	0.00235063	-138685	Negative	protein_coding	-138588	Distal target gene eQTMs
ENSG00000132970	cg17440241	WASF3	chr13	-18.5929	2.31835	3.79e-09	1.01e-08	-61761	Negative	protein_coding	-61761	Distal target gene eQTMs
ENSG00000136141	cg00191181	LRCH1	chr13	-5.79737	0.41821	6.18e-24	7.21e-23	-22756	Negative	protein_coding	-22756	Distal target gene eQTMs
ENSG00000187676	cg27059053	B3GLCT	chr13	-4.07388	0.401319	1.96e-13	7.74e-13	-9369	Negative	protein_coding	-9408	Distal target gene eQTMs
ENSG00000183098	cg17351439	GPC6	chr13	-6.39284	0.888736	1.27e-07	2.92e-07	-9007	Negative	protein_coding	-8972	Distal target gene eQTMs
ENSG00000278177	cg17351439	RP11-632L2.2	chr13	-0.263364	0.0406888	5.3e-07	1.15e-06	9202	Negative	antisense	-8497	Distal target gene eQTMs
ENSG00000134905	cg15720019	CARS2	chr13	-6.86951	0.628724	6.52e-14	2.7e-13	73963	Negative	protein_coding	-1772	Promoter-eQTMs
ENSG00000102753	cg12684360	KPNA3	chr13	23.5236	2.501	1.05e-11	3.52e-11	93601	Positive	protein_coding	0	Promoter-eQTMs
ENSG00000136108	cg06771610	CKAP2	chr13	-5.56567	0.875334	6.33e-06	1.24e-05	814	Negative	protein_coding	814	Promoter-eQTMs
ENSG00000231607	cg20863107	DLEU2	chr13	6.0618	0.501775	2.13e-15	1.02e-14	167179	Positive	antisense	1871	Promoter-eQTMs
ENSG00000229152	cg15720019	ANKRD10-IT1	chr13	4.49651	0.617531	4.5e-07	9.83e-07	-179264	Negative	sense_intronic	-1772	Promoter non-target gene eQTMs
ENSG00000204442	cg05040544	FAM155A	chr13	-5.64963	0.601907	3.33e-12	1.17e-11	-627602	Negative	protein_coding	-794	Promoter non-target gene eQTMs
ENSG00000122033	cg25697556	MTIF3	chr13	-6.05182	0.568726	1.99e-14	8.65e-14	-877349	Negative	protein_coding	-591	Promoter non-target gene eQTMs
ENSG00000136098	cg11987576	NEK3	chr13	-1.45049	0.156462	1.93e-12	6.92e-12	-328481	Negative	protein_coding	-320	Promoter non-target gene eQTMs
ENSG00000136099	cg19751179	PCDH8	chr13	5.84541	0.450355	1.53e-16	8.19e-16	-830462	Positive	protein_coding	-302	Promoter non-target gene eQTMs
ENSG00000250299	cg19751179	MRPS31P4	chr13	-0.788332	0.0684348	1.69e-16	9e-16	587692	Negative	transcribed_unprocessed_pseudogene	-302	Promoter non-target gene eQTMs
ENSG00000235280	cg20825428	MCF2L-AS1	chr13	-1.23421	0.107539	8.74e-14	3.57e-13	329820	Negative	antisense	-63	Promoter non-target gene eQTMs
ENSG00000126218	cg20825428	F10	chr13	-0.875652	0.0783635	1.24e-13	4.97e-13	-174490	Negative	protein_coding	-63	Promoter non-target gene eQTMs
ENSG00000136144	cg12684360	RCBTB1	chr13	43.5554	3.3575	8.63e-20	6.44e-19	260975	Positive	protein_coding	-35	Promoter non-target gene eQTMs
ENSG00000152520	cg06051243	PAN3	chr13	25.9218	2.69185	3.04e-13	1.18e-12	687961	Negative	protein_coding	46	Promoter non-target gene eQTMs
ENSG00000225131	cg20773729	PSME2P2	chr13	-0.382968	0.0301499	2.34e-20	1.84e-19	-920269	Positive	processed_pseudogene	78	Promoter non-target gene eQTMs
ENSG00000281106	cg07148139	RP11-327P2.7	chr13	-4.3671	0.526257	2.43e-08	5.97e-08	198330	Positive	protein_coding	448	Promoter non-target gene eQTMs
ENSG00000197168	cg07148139	NEK5	chr13	-2.37784	0.41837	0.0015241	0.00233206	-21934	Negative	protein_coding	448	Promoter non-target gene eQTMs
ENSG00000273784	cg11605771	RP11-78J21.7	chr13	0.55938	0.0862182	2.64e-06	5.34e-06	588374	Positive	processed_transcript	457	Promoter non-target gene eQTMs
ENSG00000065150	cg26665065	IPO5	chr13	20.6919	3.46825	0.00067659	0.00107475	-568655	Positive	protein_coding	-379751	Distal non-target gene eQTMs
ENSG00000139496	cg01194519	NUP58	chr13	25.4322	2.6074	2.58e-13	1.01e-12	-885100	Positive	protein_coding	35535	Distal non-target gene eQTMs
ENSG00000139505	cg25886382	MTMR6	chr13	34.6172	2.69368	7.86e-19	5.28e-18	940326	Positive	protein_coding	35664	Distal non-target gene eQTMs
ENSG00000090061	cg24708831	CCNK	chr14	5.03636	0.600222	2.91e-07	6.46e-07	-123058	Negative	protein_coding	-123058	Distal target gene eQTMs
ENSG00000165588	cg24279288	OTX2	chr14	-77.5888	7.17986	6.21e-16	3.13e-15	13140	Negative	protein_coding	-2566	Distal target gene eQTMs
ENSG00000139946	cg11121623	PELI2	chr14	-5.05227	0.88167	8.37e-05	0.00014621	-2040	Negative	protein_coding	-2040	Promoter-eQTMs
ENSG00000140090	cg03242511	SLC24A4	chr14	32.3497	6.20707	0.00072333	0.0011463	-587	Positive	protein_coding	-587	Promoter-eQTMs
ENSG00000070778	cg24708350	PTPN21	chr14	4.28675	0.910333	0.00299383	0.00442573	89355	Negative	protein_coding	-400	Promoter-eQTMs
ENSG00000279656	cg15851958	RP11-298I3.6	chr14	0.470109	0.101989	0.0102447	0.0141627	-5213	Positive	TEC	6347	Distal target gene eQTMs
ENSG00000258610	cg18442587	RP11-488C13.7	chr14	-2.60828	0.350044	7e-08	1.65e-07	16542	Negative	lincRNA	16542	Distal target gene eQTMs
ENSG00000258776	cg22470342	RP11-1085N6.5	chr14	-14.1333	1.5254	3.75e-11	1.19e-10	43148	Positive	lincRNA	32992	Distal target gene eQTMs
ENSG00000205683	cg25554810	DPF3	chr14	-18.1405	3.66915	0.01353	0.0183962	217219	Negative	protein_coding	57601	Distal target gene eQTMs
ENSG00000197324	cg25391846	LRP10	chr14	18.4242	1.7933	1.7e-11	5.57e-11	392987	Positive	protein_coding	-2447	Promoter non-target gene eQTMs
ENSG00000140153	cg08593712	WDR20	chr14	9.85499	0.929808	1.35e-13	5.4e-13	-180112	Negative	protein_coding	-2238	Promoter non-target gene eQTMs
ENSG00000092054	cg17776964	MYH7	chr14	0.602069	0.0505814	2.03e-12	7.26e-12	-923346	Positive	protein_coding	-2211	Promoter non-target gene eQTMs
ENSG00000235194	cg06445317	PPP1R3E	chr14	-23.4488	2.332	1.21e-11	4.03e-11	-806411	Negative	protein_coding	-2049	Promoter non-target gene eQTMs
ENSG00000126777	cg11121623	KTN1	chr14	-47.3942	6.03029	5.21e-08	1.24e-07	-560782	Negative	protein_coding	-2040	Promoter non-target gene eQTMs
ENSG00000089916	cg08428898	GPATCH2L	chr14	37.8277	3.06442	1.09e-17	6.58e-17	857687	Positive	protein_coding	-1734	Promoter non-target gene eQTMs
ENSG00000119640	cg08428898	ACYP1	chr14	2.86357	0.385661	1.17e-07	2.7e-07	240992	Positive	protein_coding	-1734	Promoter non-target gene eQTMs
ENSG00000260669	cg01420348	AL136419.6	chr14	-1.83314	0.158327	2.19e-15	1.05e-14	-113889	Negative	processed_transcript	-1704	Promoter non-target gene eQTMs
ENSG00000129474	cg21681740	AJUBA	chr14	1.40729	0.306838	0.0128208	0.0174794	-463055	Positive	protein_coding	-1478	Promoter non-target gene eQTMs
ENSG00000258900	cg19924714	HNRNPCP1	chr14	-1.0549	0.188008	0.00281213	0.00417214	-668611	Negative	processed_pseudogene	-1188	Promoter non-target gene eQTMs
ENSG00000180008	cg15990800	SOCS4	chr14	50.6208	4.93308	1.27e-13	5.09e-13	-244904	Negative	protein_coding	-831	Promoter non-target gene eQTMs
ENSG00000198554	cg15990800	WDHD1	chr14	5.13653	0.589631	2.39e-10	7.05e-10	333185	Negative	protein_coding	-831	Promoter non-target gene eQTMs
ENSG00000197045	cg15990800	GMFB	chr14	38.797	5.63604	3.91e-07	8.58e-07	797650	Positive	protein_coding	-831	Promoter non-target gene eQTMs
ENSG00000100823	cg22101576	APEX1	chr14	10.4226	1.91268	0.00028449	0.00047019	-644227	Positive	protein_coding	-481	Promoter non-target gene eQTMs
ENSG00000179627	cg01801200	ZBTB42	chr14	-1.46492	0.157887	2.67e-10	7.83e-10	-500433	Negative	protein_coding	-466	Promoter non-target gene eQTMs
ENSG00000013523	cg11305077	ANGEL1	chr14	19.3743	2.20779	1.58e-10	4.74e-10	-24362	Positive	protein_coding	-428	Promoter non-target gene eQTMs
ENSG00000198894	cg11305077	CIPC	chr14	15.7465	3.05514	0.0008613	0.00135239	336310	Positive	protein_coding	-428	Promoter non-target gene eQTMs
ENSG00000165861	cg05188117	ZFYVE1	chr14	4.87048	0.776786	2.31e-05	4.26e-05	-74964	Positive	protein_coding	-371	Promoter non-target gene eQTMs
ENSG00000276698	cg18473335	RP11-468E2.10	chr14	0.444289	0.0972464	0.0106323	0.0146686	127468	Positive	lincRNA	-128	Promoter non-target gene eQTMs
ENSG00000054983	cg08347595	GALC	chr14	19.9919	1.51941	2.63e-21	2.27e-20	713853	Positive	protein_coding	-76	Promoter non-target gene eQTMs
ENSG00000184227	cg21035356	ACOT1	chr14	-0.432878	0.0572509	1.78e-07	4.04e-07	642978	Negative	protein_coding	-49	Promoter non-target gene eQTMs
ENSG00000274492	cg09342330	RP11-976B16.1	chr14	2.07769	0.264122	9.22e-09	2.36e-08	-264843	Positive	lincRNA	-32	Promoter non-target gene eQTMs
ENSG00000139921	cg18705240	TMX1	chr14	6.91065	0.987238	2.18e-06	4.45e-06	295484	Positive	protein_coding	58	Promoter non-target gene eQTMs
ENSG00000071246	cg14229688	VASH1	chr14	75.6767	18.4187	0.0370251	0.0474871	-336569	Positive	protein_coding	60	Promoter non-target gene eQTMs
ENSG00000100526	cg10184292	CDKN3	chr14	-0.77744	0.149435	0.00072245	0.00114502	-874374	Negative	protein_coding	80	Promoter non-target gene eQTMs
ENSG00000198752	cg08668527	CDC42BPB	chr14	28.1934	2.19132	1.58e-19	1.14e-18	596599	Negative	protein_coding	93	Promoter non-target gene eQTMs
ENSG00000126215	cg08668527	XRCC3	chr14	1.46123	0.134298	1.76e-14	7.71e-14	-168630	Positive	protein_coding	93	Promoter non-target gene eQTMs
ENSG00000070269	cg24279288	TMEM260	chr14	-5.089	0.395426	2.98e-19	2.1e-18	-324691	Negative	protein_coding	138	Promoter non-target gene eQTMs
ENSG00000053770	cg24279288	AP5M1	chr14	-17.4413	1.56375	1.58e-16	8.44e-16	455879	Positive	protein_coding	138	Promoter non-target gene eQTMs
ENSG00000070367	cg24279288	EXOC5	chr14	-19.7333	2.19055	3.68e-11	1.17e-10	-387462	Negative	protein_coding	138	Promoter non-target gene eQTMs
ENSG00000125375	cg26286805	ATP5S	chr14	29.0585	3.81261	5.59e-08	1.33e-07	-632223	Positive	protein_coding	187	Promoter non-target gene eQTMs
ENSG00000100814	cg01027805	CCNB1IP1	chr14	-4.10544	0.343837	1.36e-16	7.31e-16	787336	Negative	protein_coding	233	Promoter non-target gene eQTMs
ENSG00000165553	cg18090147	NGB	chr14	0.241265	0.0354879	1.59e-05	2.99e-05	-225095	Positive	protein_coding	676	Promoter non-target gene eQTMs
ENSG00000119705	cg21036854	SLIRP	chr14	-7.53092	0.321517	1.9e-40	1.69e-38	667709	Negative	protein_coding	702	Promoter non-target gene eQTMs
ENSG00000139998	cg01860774	RAB15	chr14	-10.5067	1.98503	0.00171574	0.00261166	-443158	Negative	protein_coding	1056	Promoter non-target gene eQTMs
ENSG00000279026	cg25495195	RP3-414A15.12	chr14	1.45544	0.292853	0.00222285	0.00333731	687773	Positive	TEC	1195	Promoter non-target gene eQTMs
ENSG00000272909	cg04613771	CTD-2555O16.4	chr14	-0.9459	0.130266	3.66e-07	8.05e-07	-898673	Positive	antisense	1678	Promoter non-target gene eQTMs
ENSG00000232573	cg15310872	RPL3P4	chr14	-1.20513	0.13026	4.85e-09	1.27e-08	650182	Positive	processed_pseudogene	-141892	Distal non-target gene eQTMs
ENSG00000183092	cg22724319	BEGAIN	chr14	-8.63857	0.751582	8.05e-14	3.3e-13	-768683	Positive	protein_coding	-84160	Distal non-target gene eQTMs
ENSG00000066735	cg18762076	KIF26A	chr14	-2.25818	0.128682	1.62e-26	2.51e-25	509438	Positive	protein_coding	-67389	Distal non-target gene eQTMs
ENSG00000166170	cg18762076	BAG5	chr14	11.7153	1.17838	2.32e-13	9.12e-13	72741	Negative	protein_coding	-67389	Distal non-target gene eQTMs
ENSG00000100664	cg18762076	EIF5	chr14	37.8864	4.7562	2.78e-08	6.8e-08	-295741	Positive	protein_coding	-67389	Distal non-target gene eQTMs
ENSG00000139990	cg04158862	DCAF5	chr14	-7.91941	0.667028	1.56e-16	8.34e-16	607109	Negative	protein_coding	-46394	Distal non-target gene eQTMs
ENSG00000258644	cg14369329	SYNJ2BP-COX16	chr14	-0.963615	0.053741	2.68e-30	6.26e-29	-688324	Negative	protein_coding	-26144	Distal non-target gene eQTMs
ENSG00000185567	cg18759304	AHNAK2	chr14	-99.5882	14.1086	7.74e-05	0.00013575	-49369	Negative	protein_coding	-22595	Distal non-target gene eQTMs
ENSG00000119685	cg14880357	TTLL5	chr14	14.3785	3.34522	0.0226197	0.0298476	-1313550	Positive	protein_coding	-22526	Distal non-target gene eQTMs
ENSG00000119669	cg16556141	IRF2BPL	chr14	-20.9854	1.12549	1.22e-29	2.63e-28	-84018	Negative	protein_coding	-15876	Distal non-target gene eQTMs
ENSG00000100596	cg16556141	SPTLC2	chr14	21.4049	1.38602	1.22e-23	1.37e-22	-565472	Positive	protein_coding	-15876	Distal non-target gene eQTMs
ENSG00000100580	cg16556141	TMED8	chr14	21.594	2.38572	2.41e-10	7.1e-10	-394504	Positive	protein_coding	-15876	Distal non-target gene eQTMs
ENSG00000165527	cg18585629	ARF6	chr14	6.12157	0.535679	2.3e-16	1.21e-15	-967725	Positive	protein_coding	-12685	Distal non-target gene eQTMs
ENSG00000213906	cg10195768	LTB4R2	chr14	-2.59838	0.295822	4.3e-10	1.24e-09	827521	Negative	protein_coding	-8525	Distal non-target gene eQTMs
ENSG00000259133	cg26972272	RP11-1085N6.3	chr14	-0.370296	0.0835004	0.00465227	0.00672343	167899	Negative	antisense	-6385	Distal non-target gene eQTMs
ENSG00000258653	cg23367119	RP5-1021I20.4	chr14	-1.16577	0.257815	0.00984188	0.0136337	88261	Negative	protein_coding	-4963	Distal non-target gene eQTMs
ENSG00000072121	cg10188299	ZFYVE26	chr14	7.06321	0.588218	2.65e-17	1.53e-16	-211942	Positive	protein_coding	17869	Distal non-target gene eQTMs
ENSG00000081181	cg10188299	ARG2	chr14	6.0214	0.562547	1.19e-11	3.97e-11	104488	Positive	protein_coding	17869	Distal non-target gene eQTMs
ENSG00000258301	cg22825202	RP11-488C13.5	chr14	6.46419	0.878825	2.14e-07	4.82e-07	519574	Positive	lincRNA	19577	Distal non-target gene eQTMs
ENSG00000174498	cg18993701	IGDCC3	chr15	-1.74972	0.141018	3.87e-17	2.19e-16	95891	Negative	protein_coding	-44978	Distal target gene eQTMs
ENSG00000137817	cg06026862	PARP6	chr15	-9.77132	1.07479	5.19e-11	1.63e-10	40871	Negative	protein_coding	-9053	Distal target gene eQTMs
ENSG00000134138	cg16523643	MEIS2	chr15	14.3051	1.43508	1.08e-13	4.36e-13	213766	Positive	protein_coding	-1671	Promoter-eQTMs
ENSG00000138613	cg08638876	APH1B	chr15	10.4139	1.18828	1.66e-09	4.56e-09	-1294	Positive	protein_coding	-1294	Promoter-eQTMs
ENSG00000274444	cg19416470	RP11-128A17.2	chr15	-0.133347	0.0280379	0.00269516	0.00400807	8919	Negative	lincRNA	8919	Distal target gene eQTMs
ENSG00000260037	cg08337773	CTD-2524L6.3	chr15	-6.34028	1.16642	0.00181454	0.00275393	10161	Negative	antisense	10161	Distal target gene eQTMs
ENSG00000173517	cg14672106	PEAK1	chr15	25.3811	2.81723	1.63e-10	4.88e-10	-73049	Positive	protein_coding	392537	Distal target gene eQTMs
ENSG00000069667	cg16384496	RORA	chr15	-237.954	28.5095	2.41e-09	6.51e-09	103856	Negative	protein_coding	637179	Distal target gene eQTMs
ENSG00000166734	cg00982984	CASC4	chr15	12.9585	1.85059	7.56e-07	1.61e-06	-912613	Negative	protein_coding	-2193	Promoter non-target gene eQTMs
ENSG00000103657	cg01222408	HERC1	chr15	66.3354	4.91639	1.24e-19	9.1e-19	-330718	Positive	protein_coding	-1882	Promoter non-target gene eQTMs
ENSG00000140406	cg07965839	MESDC1	chr15	2.84691	0.138199	7.37e-34	2.73e-32	941607	Negative	protein_coding	-1653	Promoter non-target gene eQTMs
ENSG00000137809	cg09777506	ITGA11	chr15	1.90466	0.28673	7.42e-06	1.44e-05	523193	Positive	protein_coding	-1504	Promoter non-target gene eQTMs
ENSG00000186073	cg17850518	C15orf41	chr15	-4.82581	0.55705	4.22e-10	1.22e-09	-520279	Negative	protein_coding	-566	Promoter non-target gene eQTMs
ENSG00000066933	cg03621881	MYO9A	chr15	15.423	1.48915	1.71e-13	6.79e-13	498185	Positive	protein_coding	-530	Promoter non-target gene eQTMs
ENSG00000138629	cg01921368	UBL7	chr15	5.95567	0.93698	2.89e-05	5.29e-05	1008459	Positive	protein_coding	-489	Promoter non-target gene eQTMs
ENSG00000275645	cg01331649	RP11-817O13.9	chr15	0.373435	0.0508796	2.71e-07	6.03e-07	557477	Positive	antisense	-362	Promoter non-target gene eQTMs
ENSG00000033800	cg07709080	PIAS1	chr15	-22.2922	4.51842	0.00231524	0.00347098	-766935	Negative	protein_coding	-217	Promoter non-target gene eQTMs
ENSG00000258725	cg10570014	PRC1-AS1	chr15	-0.594697	0.0716599	3.19e-08	7.76e-08	-133811	Negative	antisense	-201	Promoter non-target gene eQTMs
ENSG00000140543	cg27617638	DET1	chr15	7.29488	0.354642	5.98e-35	2.59e-33	419083	Positive	protein_coding	-112	Promoter non-target gene eQTMs
ENSG00000259494	cg27617638	MRPL46	chr15	4.65876	0.309082	1.89e-23	2.08e-22	454046	Positive	protein_coding	-112	Promoter non-target gene eQTMs
ENSG00000166813	cg27617638	KIF7	chr15	-1.7994	0.116628	2.5e-22	2.43e-21	-695266	Positive	protein_coding	-112	Promoter non-target gene eQTMs
ENSG00000198794	cg14822850	SCAMP5	chr15	217.421	45.1706	0.00518061	0.0074484	341585	Positive	protein_coding	-38	Promoter non-target gene eQTMs
ENSG00000278769	cg02376269	CTD-2036P10.5	chr15	-0.226854	0.0359727	3.7e-05	6.7e-05	-382046	Negative	antisense	-35	Promoter non-target gene eQTMs
ENSG00000166823	cg07344583	MESP1	chr15	0.644162	0.0471402	1.72e-21	1.52e-20	-835261	Positive	protein_coding	11	Promoter non-target gene eQTMs
ENSG00000140386	cg00260857	SCAPER	chr15	69.0376	9.97024	1.32e-06	2.75e-06	-444087	Positive	protein_coding	42	Promoter non-target gene eQTMs
ENSG00000103671	cg18993701	TRIP4	chr15	4.4385	0.36558	1.89e-17	1.11e-16	-1035270	Negative	protein_coding	54	Promoter non-target gene eQTMs
ENSG00000241839	cg18993701	PLEKHO2	chr15	-25.2918	2.36795	7.58e-12	2.57e-11	-581135	Negative	protein_coding	54	Promoter non-target gene eQTMs
ENSG00000140521	cg16468079	POLG	chr15	-3.93609	0.683009	9.45e-05	0.00016426	-391848	Negative	protein_coding	61	Promoter non-target gene eQTMs
ENSG00000178741	cg21245483	COX5A	chr15	-10.9265	0.911605	5.8e-17	3.23e-16	-321451	Negative	protein_coding	160	Promoter non-target gene eQTMs
ENSG00000166192	cg11609045	SENP8	chr15	6.19351	0.898067	8.64e-07	1.83e-06	-117390	Positive	protein_coding	174	Promoter non-target gene eQTMs
ENSG00000169018	cg01618114	FEM1B	chr15	25.1837	4.18242	2.9e-05	5.3e-05	-300895	Positive	protein_coding	329	Promoter non-target gene eQTMs
ENSG00000234797	cg24219929	RPS3AP6	chr15	-0.408691	0.0415663	4.4e-12	1.52e-11	-824197	Negative	processed_pseudogene	478	Promoter non-target gene eQTMs
ENSG00000261423	cg22171725	RP11-1007O24.3	chr15	-0.300255	0.0594812	0.00181391	0.00275321	-176550	Negative	lincRNA	594	Promoter non-target gene eQTMs
ENSG00000213614	cg16940801	HEXA	chr15	-20.537	1.39057	5.14e-24	6.07e-23	-109744	Negative	protein_coding	647	Promoter non-target gene eQTMs
ENSG00000140538	cg16661000	NTRK3	chr15	-8.54209	2.12099	0.0321893	0.0416282	1034728	Positive	protein_coding	1147	Promoter non-target gene eQTMs
ENSG00000140497	cg13901734	SCAMP2	chr15	-4.89894	0.687982	9.02e-07	1.91e-06	199246	Negative	protein_coding	-85757	Distal non-target gene eQTMs
ENSG00000129009	cg10294252	ISLR	chr15	-3.41049	0.499863	0.00112923	0.00175212	-446423	Negative	protein_coding	-78956	Distal non-target gene eQTMs
ENSG00000179335	cg13835518	CLK3	chr15	-26.7749	4.39862	7.93e-05	0.00013893	-429650	Negative	protein_coding	-70931	Distal non-target gene eQTMs
ENSG00000166140	cg26662201	ZFYVE19	chr15	-4.05844	0.923871	0.0194158	0.0258157	700980	Negative	protein_coding	-66795	Distal non-target gene eQTMs
ENSG00000171763	cg12289486	SPATA5L1	chr15	1.78692	0.376959	0.00532764	0.00764415	222693	Positive	protein_coding	-49710	Distal non-target gene eQTMs
ENSG00000140527	cg01964282	WDR93	chr15	-0.438171	0.059843	1.75e-07	3.98e-07	672458	Negative	protein_coding	-28108	Distal non-target gene eQTMs
ENSG00000171914	cg21067343	TLN2	chr15	11.483	2.25847	0.00133543	0.00205321	-812385	Positive	protein_coding	-13442	Distal non-target gene eQTMs
ENSG00000140575	cg23790660	IQGAP1	chr15	13.9813	2.42266	0.00088443	0.00138734	-147093	Positive	protein_coding	-5410	Distal non-target gene eQTMs
ENSG00000067369	cg14205524	TP53BP1	chr15	-17.7147	1.18401	4.73e-23	4.99e-22	-907313	Positive	protein_coding	-4625	Distal non-target gene eQTMs
ENSG00000128881	cg14205524	TTBK2	chr15	-26.7205	2.00219	3.73e-19	2.59e-18	-242982	Negative	protein_coding	-4625	Distal non-target gene eQTMs
ENSG00000159433	cg14205524	STARD9	chr15	-53.4461	4.26517	7.8e-16	3.9e-15	79858	Negative	protein_coding	-4625	Distal non-target gene eQTMs
ENSG00000259426	cg25874953	RP11-253M7.1	chr15	0.873962	0.0579902	5.37e-23	5.62e-22	-606794	Positive	antisense	11815	Distal non-target gene eQTMs
ENSG00000166938	cg04675288	DIS3L	chr15	10.3161	2.18951	0.00709914	0.0100239	938669	Positive	protein_coding	23492	Distal non-target gene eQTMs
ENSG00000205078	cg06071631	SYCE1L	chr16	-1.98009	0.113969	2.66e-31	6.93e-30	-13017	Negative	protein_coding	-13017	Distal target gene eQTMs
ENSG00000122257	cg09255851	RBBP6	chr16	-27.7428	2.56016	6.88e-14	2.84e-13	-6596	Positive	protein_coding	-6596	Distal target gene eQTMs
ENSG00000234719	cg16495772	RP11-166B2.1	chr16	-1.53806	0.233824	1.88e-06	3.86e-06	48599	Negative	protein_coding	671	Promoter-eQTMs
ENSG00000263968	cg16538178	RN7SL381P	chr16	-0.372241	0.0407876	1.44e-09	3.97e-09	45399	Negative	misc_RNA	45399	Distal target gene eQTMs
ENSG00000260750	cg06423975	RP11-482M8.1	chr16	-0.849229	0.0407926	2.23e-33	7.72e-32	-458898	Negative	lincRNA	-2209	Promoter non-target gene eQTMs
ENSG00000167508	cg06423975	MVD	chr16	-18.471	1.08154	1.1e-25	1.55e-24	-700482	Negative	protein_coding	-2209	Promoter non-target gene eQTMs
ENSG00000260630	cg06423975	SNAI3-AS1	chr16	-2.08959	0.122893	4.54e-23	4.8e-22	711845	Negative	antisense	-2209	Promoter non-target gene eQTMs
ENSG00000132207	cg17801467	SLX1A	chr16	-8.2177	0.434937	3.33e-29	6.84e-28	-505137	Negative	protein_coding	-815	Promoter non-target gene eQTMs
ENSG00000103507	cg17801467	BCKDK	chr16	-10.034	0.617101	7.23e-24	8.32e-23	407083	Negative	protein_coding	-815	Promoter non-target gene eQTMs
ENSG00000205084	cg22863815	TMEM231	chr16	-3.69795	0.507731	2.79e-07	6.2e-07	-76033	Negative	protein_coding	-691	Promoter non-target gene eQTMs
ENSG00000267077	cg06976003	RP11-127I20.5	chr16	-1.14409	0.103859	5.7e-11	1.78e-10	51976	Negative	antisense	-576	Promoter non-target gene eQTMs
ENSG00000140623	cg06976003	SEPTIN12	chr16	-1.08919	0.156401	0.00030747	0.00050683	69572	Positive	protein_coding	-576	Promoter non-target gene eQTMs
ENSG00000175938	cg10192164	ORAI3	chr16	-5.16236	0.336859	2.12e-24	2.6e-23	541214	Negative	protein_coding	-557	Promoter non-target gene eQTMs
ENSG00000102882	cg10192164	MAPK3	chr16	-33.3356	3.27643	9.73e-13	3.59e-12	293749	Negative	protein_coding	-557	Promoter non-target gene eQTMs
ENSG00000149925	cg10192164	ALDOA	chr16	-367.299	38.4816	1.86e-11	6.08e-11	-343690	Positive	protein_coding	-557	Promoter non-target gene eQTMs
ENSG00000150281	cg10192164	CTF1	chr16	-2.30798	0.24114	3.91e-11	1.24e-10	488753	Negative	protein_coding	-557	Promoter non-target gene eQTMs
ENSG00000090238	cg10192164	YPEL3	chr16	-21.4363	2.6316	9.88e-09	2.52e-08	315540	Positive	protein_coding	-557	Promoter non-target gene eQTMs
ENSG00000254206	cg20430470	NPIPB11	chr16	-3.00931	0.334295	3.38e-08	8.21e-08	424036	Negative	protein_coding	-400	Promoter non-target gene eQTMs
ENSG00000248124	cg07696690	RRN3P1	chr16	-5.10567	0.416439	3.83e-17	2.17e-16	-895850	Negative	transcribed_unprocessed_pseudogene	-388	Promoter non-target gene eQTMs
ENSG00000260306	cg07696690	RP11-645C24.5	chr16	-0.518586	0.0846064	1.46e-05	2.75e-05	-893839	Negative	lincRNA	-388	Promoter non-target gene eQTMs
ENSG00000184517	cg13026556	ZFP1	chr16	5.67207	0.927597	3.83e-05	6.92e-05	-311701	Positive	protein_coding	-178	Promoter non-target gene eQTMs
ENSG00000260772	cg07009835	RP11-311C24.1	chr16	-9.93746	1.7653	0.00023374	0.00038982	-983165	Positive	3prime_overlapping_ncRNA	-164	Promoter non-target gene eQTMs
ENSG00000261052	cg19970236	SULT1A3	chr16	-5.79067	0.917513	0.00010802	0.00018636	-208174	Negative	protein_coding	-105	Promoter non-target gene eQTMs
ENSG00000156860	cg09756132	FBRS	chr16	-24.1117	1.37785	4e-28	7.3e-27	251032	Negative	protein_coding	-102	Promoter non-target gene eQTMs
ENSG00000125122	cg09302448	LRRC29	chr16	0.526643	0.0392197	1.47e-19	1.07e-18	321630	Positive	protein_coding	-94	Promoter non-target gene eQTMs
ENSG00000186153	cg08841508	WWOX	chr16	-3.23424	0.485919	4.6e-06	9.09e-06	908591	Negative	protein_coding	-4	Promoter non-target gene eQTMs
ENSG00000099364	cg09225442	FBXL19	chr16	10.7761	0.438513	5.48e-42	5.84e-40	272336	Negative	protein_coding	-2	Promoter non-target gene eQTMs
ENSG00000167394	cg09225442	ZNF668	chr16	2.32902	0.103769	6.15e-36	3.02e-34	-410124	Negative	protein_coding	-2	Promoter non-target gene eQTMs
ENSG00000180096	cg09225442	SEPTIN1	chr16	2.97496	0.125711	6.52e-35	2.79e-33	272586	Positive	protein_coding	-2	Promoter non-target gene eQTMs
ENSG00000140691	cg09225442	ARMC5	chr16	6.52759	0.343476	3.34e-32	9.65e-31	807361	Positive	protein_coding	-2	Promoter non-target gene eQTMs
ENSG00000229809	cg09225442	ZNF688	chr16	2.93326	0.15477	4.82e-32	1.38e-30	81373	Positive	protein_coding	-2	Promoter non-target gene eQTMs
ENSG00000174939	cg09225442	ASPHD1	chr16	3.58464	0.214353	7.83e-26	1.12e-24	-750344	Positive	protein_coding	-2	Promoter non-target gene eQTMs
ENSG00000179965	cg09225442	ZNF771	chr16	1.49222	0.0966549	4e-23	4.24e-22	-243422	Positive	protein_coding	-2	Promoter non-target gene eQTMs
ENSG00000176723	cg09225442	ZNF843	chr16	1.09727	0.0769993	3.12e-22	3e-21	-781874	Positive	protein_coding	-2	Promoter non-target gene eQTMs
ENSG00000169221	cg09225442	TBC1D10B	chr16	10.553	0.80899	2.26e-18	1.46e-17	293617	Negative	protein_coding	-2	Promoter non-target gene eQTMs
ENSG00000099365	cg09225442	STX1B	chr16	21.5744	1.68167	4.46e-16	2.28e-15	-338537	Positive	protein_coding	-2	Promoter non-target gene eQTMs
ENSG00000103485	cg09225442	QPRT	chr16	4.74748	0.55611	1.85e-08	4.6e-08	-987440	Positive	protein_coding	-2	Promoter non-target gene eQTMs
ENSG00000103091	cg22899561	WDR59	chr16	34.1766	3.80779	2.64e-09	7.11e-09	378702	Positive	protein_coding	13	Promoter non-target gene eQTMs
ENSG00000159753	cg03412735	CARMIL2	chr16	-1.65717	0.108084	3.42e-21	2.93e-20	-803627	Negative	protein_coding	73	Promoter non-target gene eQTMs
ENSG00000224470	cg00411010	ATXN1L	chr16	-3.94066	0.402887	2.57e-13	1.01e-12	122915	Negative	protein_coding	119	Promoter non-target gene eQTMs
ENSG00000072736	cg21820357	NFATC3	chr16	6.97957	0.623307	1.32e-14	5.85e-14	556217	Positive	protein_coding	141	Promoter non-target gene eQTMs
ENSG00000237296	cg11513416	SMG1P1	chr16	-3.99431	0.527717	1.3e-08	3.28e-08	72036	Negative	transcribed_unprocessed_pseudogene	149	Promoter non-target gene eQTMs
ENSG00000102879	cg11354390	CORO1A	chr16	-2.48204	0.289672	7.58e-09	1.96e-08	-212516	Negative	protein_coding	648	Promoter non-target gene eQTMs
ENSG00000103342	cg14452248	GSPT1	chr16	13.3413	2.82682	0.00905533	0.0126017	-883468	Positive	protein_coding	-50757	Distal non-target gene eQTMs
ENSG00000261611	cg07671622	AC010547.9	chr16	4.548	0.80292	0.00036729	0.00060053	-721509	Positive	protein_coding	-40025	Distal non-target gene eQTMs
ENSG00000254634	cg05047095	SMG1P6	chr16	-0.380823	0.0621306	0.00010646	0.00018372	991721	Negative	unprocessed_pseudogene	-39415	Distal non-target gene eQTMs
ENSG00000013364	cg06574867	MVP	chr16	-9.65425	1.35171	4.78e-06	9.43e-06	-595957	Positive	protein_coding	-38245	Distal non-target gene eQTMs
ENSG00000089280	cg06574867	FUS	chr16	40.8519	6.41076	2.2e-05	4.07e-05	763759	Positive	protein_coding	-38245	Distal non-target gene eQTMs
ENSG00000197006	cg05049784	METTL9	chr16	-16.8724	1.88386	1.06e-09	2.96e-09	-593885	Negative	protein_coding	-25520	Distal non-target gene eQTMs
ENSG00000271105	cg09255851	SCML2P2	chr16	-0.301092	0.0283757	1.03e-13	4.17e-13	525281	Negative	processed_pseudogene	-6596	Distal non-target gene eQTMs
ENSG00000260072	cg09255851	CTD-2313J23.1	chr16	-0.850706	0.0847386	7.86e-13	2.93e-12	71491	Negative	lincRNA	-6596	Distal non-target gene eQTMs
ENSG00000260448	cg09255851	LCMT1-AS1	chr16	0.333267	0.0302763	2.16e-12	7.71e-12	-540879	Positive	lincRNA	-6596	Distal non-target gene eQTMs
ENSG00000257122	cg10716582	RRN3P3	chr16	0.306664	0.0453343	1.1e-06	2.31e-06	-57154	Positive	transcribed_unprocessed_pseudogene	3603	Distal non-target gene eQTMs
ENSG00000274460	cg17210124	CTD-2649C14.2	chr16	-0.786134	0.0697077	2.96e-15	1.4e-14	408354	Negative	processed_transcript	6549	Distal non-target gene eQTMs
ENSG00000140650	cg06322218	PMM2	chr16	0.835062	0.145435	0.00011789	0.00020245	-161983	Positive	protein_coding	11900	Distal non-target gene eQTMs
ENSG00000261332	cg06714444	RP11-297C4.1	chr16	-0.545949	0.100871	0.0006743	0.00107151	135919	Negative	antisense	16032	Distal non-target gene eQTMs
ENSG00000233024	cg05057352	RP11-1212A22.4	chr16	11.4941	2.90056	0.0350125	0.0450603	-952633	Positive	protein_coding	65428	Distal non-target gene eQTMs
ENSG00000121057	cg15870043	AKAP1	chr17	30.3015	7.0094	0.0103671	0.0143206	-12712	Positive	protein_coding	-12712	Distal target gene eQTMs
ENSG00000267506	cg10430734	RP11-13K12.1	chr17	-3.06777	0.314912	8.1e-10	2.28e-09	-1210	Negative	lincRNA	-1210	Promoter-eQTMs
ENSG00000267665	cg02807192	RP11-13K12.2	chr17	-4.78798	0.887768	0.00660658	0.00936074	-11142	Negative	lincRNA	-1031	Promoter-eQTMs
ENSG00000258890	cg18349516	CEP95	chr17	-22.8054	1.66297	3.76e-21	3.2e-20	-752	Positive	protein_coding	-1029	Promoter-eQTMs
ENSG00000141568	cg12328272	FOXK2	chr17	-11.3262	0.684552	3.66e-26	5.44e-25	-563	Negative	protein_coding	-563	Promoter-eQTMs
ENSG00000279602	cg10360323	CTD-3014M21.1	chr17	-0.633428	0.0987944	0.0001391	0.00023691	468	Negative	TEC	852	Promoter-eQTMs
ENSG00000266709	cg15119650	RP11-214O1.2	chr17	1.25846	0.257538	0.00278771	0.0041394	1368	Positive	lincRNA	1368	Promoter-eQTMs
ENSG00000261873	cg05817667	RP11-515E23.1	chr17	-2.70127	0.597183	0.00406477	0.00591376	46429	Negative	protein_coding	16582	Distal target gene eQTMs
ENSG00000179604	cg01675121	CDC42EP4	chr17	-232.304	19.8831	1.08e-13	4.36e-13	8465	Negative	protein_coding	20086	Distal target gene eQTMs
ENSG00000136450	cg02025083	SRSF1	chr17	-81.445	4.75658	3.64e-28	6.67e-27	-13985	Negative	protein_coding	20412	Distal target gene eQTMs
ENSG00000070495	cg05147273	JMJD6	chr17	-34.5028	3.81986	1.98e-09	5.39e-09	-12110	Negative	protein_coding	26077	Distal target gene eQTMs
ENSG00000266378	cg17639046	RP11-214O1.3	chr17	0.86144	0.10067	1.78e-08	4.43e-08	26625	Positive	lincRNA	26625	Distal target gene eQTMs
ENSG00000141510	cg09566763	TP53	chr17	3.3577	0.218123	5.4e-21	4.52e-20	-11337	Positive	protein_coding	37108	Distal target gene eQTMs
ENSG00000178607	cg03031503	ERN1	chr17	-10.5595	1.52651	3.36e-06	6.72e-06	41223	Negative	protein_coding	50454	Distal target gene eQTMs
ENSG00000173714	cg03418876	WFIKKN2	chr17	0.976733	0.158613	0.00030146	0.00049725	112671	Negative	protein_coding	-2435	Promoter non-target gene eQTMs
ENSG00000108256	cg01406758	NUFIP2	chr17	-40.8139	3.69238	2.61e-13	1.02e-12	-303457	Negative	protein_coding	-1869	Promoter non-target gene eQTMs
ENSG00000087095	cg01406758	NLK	chr17	-35.8881	3.45303	5.55e-13	2.1e-12	-910645	Negative	protein_coding	-1869	Promoter non-target gene eQTMs
ENSG00000266820	cg18349516	RP13-104F24.1	chr17	-1.83611	0.106765	4.88e-30	1.1e-28	-242301	Negative	transcribed_unprocessed_pseudogene	-1029	Promoter non-target gene eQTMs
ENSG00000214174	cg18349516	AMZ2P1	chr17	-3.99235	0.326538	7.48e-19	5.04e-18	-458933	Negative	transcribed_unprocessed_pseudogene	-1029	Promoter non-target gene eQTMs
ENSG00000109083	cg02668694	IFT20	chr17	-11.8015	0.613161	4.67e-31	1.19e-29	-285812	Negative	protein_coding	-776	Promoter non-target gene eQTMs
ENSG00000076382	cg02668694	SPAG5	chr17	-5.65207	0.438861	1.15e-16	6.23e-16	-535052	Negative	protein_coding	-776	Promoter non-target gene eQTMs
ENSG00000198920	cg06421614	KIAA0753	chr17	-7.55047	0.431873	4.66e-28	8.48e-27	639650	Negative	protein_coding	-672	Promoter non-target gene eQTMs
ENSG00000169710	cg06413206	FASN	chr17	-63.1025	3.11032	1.71e-30	4.1e-29	380437	Negative	protein_coding	-595	Promoter non-target gene eQTMs
ENSG00000249459	cg25414799	ZNF286B	chr17	1.07362	0.237212	0.010453	0.014437	-474760	Positive	protein_coding	-591	Promoter non-target gene eQTMs
ENSG00000185359	cg12328272	HGS	chr17	-18.2935	0.925674	3.43e-34	1.34e-32	-836950	Negative	protein_coding	-563	Promoter non-target gene eQTMs
ENSG00000141522	cg12328272	ARHGDIA	chr17	-20.2002	1.14806	7.08e-25	9.07e-24	652555	Negative	protein_coding	-563	Promoter non-target gene eQTMs
ENSG00000186765	cg12328272	FSCN2	chr17	-9.56806	0.804188	3.11e-14	1.33e-13	-991880	Negative	protein_coding	-563	Promoter non-target gene eQTMs
ENSG00000073969	cg04294625	NSF	chr17	124.379	14.792	1.13e-09	3.14e-09	-1059189	Positive	protein_coding	-438	Promoter non-target gene eQTMs
ENSG00000183048	cg14556515	SLC25A10	chr17	-3.31364	0.164723	7.25e-31	1.81e-29	-746342	Negative	protein_coding	-398	Promoter non-target gene eQTMs
ENSG00000169696	cg14556515	ASPSCR1	chr17	-15.9725	0.9819	6.63e-25	8.55e-24	-481771	Negative	protein_coding	-398	Promoter non-target gene eQTMs
ENSG00000169718	cg14556515	DUS1L	chr17	-17.647	1.28834	2.62e-22	2.55e-21	401072	Negative	protein_coding	-398	Promoter non-target gene eQTMs
ENSG00000141551	cg14556515	CSNK1D	chr17	-25.9084	1.98185	5.7e-19	3.89e-18	219555	Negative	protein_coding	-398	Promoter non-target gene eQTMs
ENSG00000262049	cg14556515	RP13-1032I1.7	chr17	-4.06623	0.302336	4.4e-17	2.48e-16	757254	Negative	antisense	-398	Promoter non-target gene eQTMs
ENSG00000169733	cg14556515	RFNG	chr17	-10.1035	0.877713	3.98e-16	2.04e-15	410676	Negative	protein_coding	-398	Promoter non-target gene eQTMs
ENSG00000204237	cg14556515	OXLD1	chr17	-3.52637	0.34421	9.05e-14	3.69e-13	793542	Positive	protein_coding	-398	Promoter non-target gene eQTMs
ENSG00000185624	cg14556515	P4HB	chr17	-40.7328	3.98344	7.95e-12	2.69e-11	615417	Positive	protein_coding	-398	Promoter non-target gene eQTMs
ENSG00000176845	cg14556515	METRNL	chr17	-8.62979	0.830447	7.25e-11	2.24e-10	621031	Negative	protein_coding	-398	Promoter non-target gene eQTMs
ENSG00000182446	cg14556515	NPLOC4	chr17	-13.875	1.51667	6.73e-10	1.91e-09	901691	Negative	protein_coding	-398	Promoter non-target gene eQTMs
ENSG00000141552	cg14556515	ANAPC11	chr17	-4.45539	0.566958	6.26e-08	1.48e-07	-567788	Positive	protein_coding	-398	Promoter non-target gene eQTMs
ENSG00000169689	cg14556515	STRA13	chr17	-3.18761	0.476716	6.89e-06	1.34e-05	439876	Positive	protein_coding	-398	Promoter non-target gene eQTMs
ENSG00000176155	cg13749424	CCDC57	chr17	-17.3296	2.7786	0.00013117	0.00022414	357108	Negative	protein_coding	-388	Promoter non-target gene eQTMs
ENSG00000178502	cg02570171	KLHL11	chr17	18.4064	0.97236	1.95e-29	4.09e-28	-182575	Positive	protein_coding	-377	Promoter non-target gene eQTMs
ENSG00000131470	cg02570171	PSMC3IP	chr17	-1.5902	0.218287	7.64e-07	1.63e-06	-906372	Negative	protein_coding	-377	Promoter non-target gene eQTMs
ENSG00000167842	cg15847614	MIS12	chr17	-10.9918	0.595362	6.96e-30	1.54e-28	-958414	Positive	protein_coding	-284	Promoter non-target gene eQTMs
ENSG00000109046	cg11920325	WSB1	chr17	-80.443	8.14664	5.28e-12	1.81e-11	-747940	Negative	protein_coding	-279	Promoter non-target gene eQTMs
ENSG00000161956	cg12709244	SENP3	chr17	12.4226	1.07725	4.51e-16	2.3e-15	341956	Negative	protein_coding	-261	Promoter non-target gene eQTMs
ENSG00000167302	cg22471020	TEPSIN	chr17	-2.65918	0.232864	5.08e-15	2.34e-14	438345	Negative	protein_coding	-258	Promoter non-target gene eQTMs
ENSG00000233223	cg10138041	AC113189.5	chr17	-1.78472	0.0670013	8.32e-43	9.95e-41	-97589	Negative	antisense	-112	Promoter non-target gene eQTMs
ENSG00000171634	cg08701551	BPTF	chr17	20.3298	3.93572	0.0008041	0.00126791	-465863	Positive	protein_coding	-99	Promoter non-target gene eQTMs
ENSG00000075461	cg18147309	CACNG4	chr17	-3.45698	0.266112	3.79e-20	2.92e-19	-401999	Negative	protein_coding	-79	Promoter non-target gene eQTMs
ENSG00000265100	cg18147309	RP11-147L13.2	chr17	-1.05955	0.0781601	6.07e-16	3.06e-15	-879923	Negative	antisense	-79	Promoter non-target gene eQTMs
ENSG00000141034	cg12079271	GID4	chr17	-1.37434	0.216987	1.51e-05	2.84e-05	202219	Negative	protein_coding	-71	Promoter non-target gene eQTMs
ENSG00000205309	cg21652344	NT5M	chr17	-0.979834	0.077909	3.28e-17	1.87e-16	-533716	Positive	protein_coding	-49	Promoter non-target gene eQTMs
ENSG00000141456	cg07156424	PELP1	chr17	-28.7721	1.49776	2.98e-33	1e-31	-526712	Positive	protein_coding	-42	Promoter non-target gene eQTMs
ENSG00000074356	cg07156424	NCBP3	chr17	26.2251	1.39046	1.11e-32	3.38e-31	340904	Positive	protein_coding	-42	Promoter non-target gene eQTMs
ENSG00000108518	cg07156424	PFN1	chr17	-17.5187	1.52826	2.29e-14	9.92e-14	-802590	Negative	protein_coding	-42	Promoter non-target gene eQTMs
ENSG00000182853	cg07156424	VMO1	chr17	-0.554657	0.0513183	1.54e-11	5.07e-11	-642223	Negative	protein_coding	-42	Promoter non-target gene eQTMs
ENSG00000108509	cg07156424	CAMTA2	chr17	-20.1046	2.30029	8.8e-10	2.47e-09	-824930	Negative	protein_coding	-42	Promoter non-target gene eQTMs
ENSG00000141503	cg07156424	MINK1	chr17	-41.3415	5.03669	3.8e-09	1.01e-08	690278	Negative	protein_coding	-42	Promoter non-target gene eQTMs
ENSG00000141497	cg07156424	ZMYND15	chr17	-0.605686	0.0901087	2.49e-05	4.58e-05	596771	Negative	protein_coding	-42	Promoter non-target gene eQTMs
ENSG00000167131	cg07481784	CCDC103	chr17	-2.46718	0.175018	6.25e-21	5.2e-20	-162007	Negative	protein_coding	-40	Promoter non-target gene eQTMs
ENSG00000181222	cg23566401	POLR2A	chr17	60.7033	5.96424	2.66e-13	1.04e-12	267201	Negative	protein_coding	-40	Promoter non-target gene eQTMs
ENSG00000186834	cg07481784	HEXIM1	chr17	5.22747	0.622293	2.23e-09	6.04e-09	87353	Positive	protein_coding	-40	Promoter non-target gene eQTMs
ENSG00000264589	cg24354954	MAPT-AS1	chr17	1.14786	0.0679242	2.43e-26	3.68e-25	-738269	Positive	antisense	-12	Promoter non-target gene eQTMs
ENSG00000186566	cg24354954	GPATCH8	chr17	-23.1516	1.82882	1.46e-17	8.67e-17	665840	Negative	protein_coding	-12	Promoter non-target gene eQTMs
ENSG00000174327	cg27248073	SLC16A13	chr17	0.432737	0.0368246	7.07e-14	2.91e-13	591668	Positive	protein_coding	8	Promoter non-target gene eQTMs
ENSG00000108309	cg12842219	RUNDC3A	chr17	-36.9229	2.10426	6.17e-27	1e-25	909518	Positive	protein_coding	64	Promoter non-target gene eQTMs
ENSG00000184451	cg12842219	CCR10	chr17	-0.99695	0.0547851	1.61e-26	2.5e-25	720006	Positive	protein_coding	64	Promoter non-target gene eQTMs
ENSG00000108840	cg12842219	HDAC5	chr17	-43.4405	3.29536	2.02e-19	1.44e-18	-677851	Positive	protein_coding	64	Promoter non-target gene eQTMs
ENSG00000126581	cg12842219	BECN1	chr17	8.2836	0.656363	2.54e-17	1.47e-16	588761	Positive	protein_coding	64	Promoter non-target gene eQTMs
ENSG00000168591	cg12842219	TMUB2	chr17	-6.58877	0.583634	3.97e-16	2.04e-15	788075	Negative	protein_coding	64	Promoter non-target gene eQTMs
ENSG00000177469	cg12842219	PTRF	chr17	-9.2691	0.763151	1.98e-14	8.62e-14	996446	Negative	protein_coding	64	Promoter non-target gene eQTMs
ENSG00000037042	cg12842219	TUBG2	chr17	-7.60668	0.719357	2.32e-12	8.25e-12	-739611	Positive	protein_coding	64	Promoter non-target gene eQTMs
ENSG00000188554	cg12842219	NBR1	chr17	39.2158	3.98655	3.31e-12	1.16e-11	-228414	Positive	protein_coding	64	Promoter non-target gene eQTMs
ENSG00000013306	cg12842219	SLC25A39	chr17	-10.0134	1.09137	2.36e-11	7.64e-11	-920730	Positive	protein_coding	64	Promoter non-target gene eQTMs
ENSG00000108784	cg12842219	NAGLU	chr17	-2.36162	0.255998	4.26e-10	1.23e-09	-862654	Positive	protein_coding	64	Promoter non-target gene eQTMs
ENSG00000012048	cg12842219	BRCA1	chr17	4.23651	0.527877	1.93e-08	4.79e-08	354600	Negative	protein_coding	64	Promoter non-target gene eQTMs
ENSG00000010244	cg18459257	ZNF207	chr17	-46.1134	3.07271	1.03e-24	1.3e-23	84118	Negative	protein_coding	177	Promoter non-target gene eQTMs
ENSG00000184619	cg14210275	KRBA2	chr17	-6.00133	1.29321	0.0182874	0.0243965	-180714	Negative	protein_coding	211	Promoter non-target gene eQTMs
ENSG00000141040	cg04887328	ZNF287	chr17	2.23416	0.312491	6.83e-07	1.46e-06	495335	Positive	protein_coding	256	Promoter non-target gene eQTMs
ENSG00000205325	cg17639046	AC005863.1	chr17	-8.24014	1.1461	1.12e-07	2.59e-07	-466873	Positive	lincRNA	373	Promoter non-target gene eQTMs
ENSG00000197170	cg11879514	PSMD12	chr17	6.25831	1.55306	0.031439	0.0407238	952975	Negative	protein_coding	376	Promoter non-target gene eQTMs
ENSG00000167363	cg02927804	FN3K	chr17	-9.14069	1.51368	9.28e-05	0.00016145	216392	Negative	protein_coding	490	Promoter non-target gene eQTMs
ENSG00000261888	cg02927804	AC144831.1	chr17	-1.36325	0.255847	0.0137663	0.0186944	585032	Negative	lincRNA	490	Promoter non-target gene eQTMs
ENSG00000178971	cg18327730	CTC1	chr17	-20.9735	2.00354	5.74e-14	2.39e-13	-38462	Negative	protein_coding	592	Promoter non-target gene eQTMs
ENSG00000173826	cg16199912	KCNH6	chr17	7.28304	0.659961	6.37e-14	2.64e-13	-982638	Positive	protein_coding	616	Promoter non-target gene eQTMs
ENSG00000136457	cg11238193	CHAD	chr17	-0.967313	0.146814	0.00016976	0.00028693	242705	Negative	protein_coding	723	Promoter non-target gene eQTMs
ENSG00000273576	cg12233386	RP11-390P24.1	chr17	0.871253	0.129339	4.66e-06	9.2e-06	-741512	Positive	lincRNA	765	Promoter non-target gene eQTMs
ENSG00000196544	cg24893073	BORCS6	chr17	3.81112	0.17721	2.77e-37	1.63e-35	-349525	Negative	protein_coding	1096	Promoter non-target gene eQTMs
ENSG00000136444	cg17949255	RSAD1	chr17	-4.42064	0.896525	0.00360152	0.00527253	-386686	Negative	protein_coding	1133	Promoter non-target gene eQTMs
ENSG00000131469	cg05299486	RPL27	chr17	14.7315	1.31987	1.76e-15	8.5e-15	540911	Positive	protein_coding	1482	Promoter non-target gene eQTMs
ENSG00000175155	cg26223272	YPEL2	chr17	-65.357	8.45325	2.92e-08	7.13e-08	792436	Negative	protein_coding	1599	Promoter non-target gene eQTMs
ENSG00000279879	cg19513247	RP11-1072C15.6	chr17	0.501374	0.0991925	0.0030421	0.00449473	470173	Positive	TEC	1716	Promoter non-target gene eQTMs
ENSG00000126861	cg13151353	OMG	chr17	12.2378	1.80814	2.58e-06	5.22e-06	1003241	Positive	protein_coding	-132800	Distal non-target gene eQTMs
ENSG00000178921	cg08014272	PFAS	chr17	8.17619	1.31613	3.25e-05	5.91e-05	411210	Positive	protein_coding	-119054	Distal non-target gene eQTMs
ENSG00000273604	cg24724583	C17orf96	chr17	-3.17431	0.418656	5.34e-06	1.05e-05	479357	Negative	protein_coding	-94041	Distal non-target gene eQTMs
ENSG00000170222	cg15743799	ADPRM	chr17	-3.67367	0.25207	5.37e-24	6.32e-23	795333	Negative	protein_coding	-80055	Distal non-target gene eQTMs
ENSG00000065320	cg15743799	NTN1	chr17	1.168	0.0845718	7.78e-19	5.23e-18	-880751	Positive	protein_coding	-80055	Distal non-target gene eQTMs
ENSG00000179598	cg25105700	PLD6	chr17	-2.01322	0.409823	0.00353618	0.00518594	-84088	Negative	protein_coding	-74362	Distal non-target gene eQTMs
ENSG00000008294	cg10792202	SPAG9	chr17	66.7288	7.25262	2.13e-10	6.31e-10	-30610	Negative	protein_coding	-64885	Distal non-target gene eQTMs
ENSG00000278963	cg10792202	RP11-294J22.7	chr17	-1.63014	0.147726	2.62e-10	7.7e-10	-209490	Negative	TEC	-64885	Distal non-target gene eQTMs
ENSG00000267248	cg26962505	CTD-2319I12.4	chr17	-0.442669	0.0964017	0.00403809	0.0058769	-749068	Negative	processed_transcript	-41885	Distal non-target gene eQTMs
ENSG00000221995	cg23879164	TIAF1	chr17	-2.70754	0.611697	0.0169715	0.0227499	104320	Negative	protein_coding	-37358	Distal non-target gene eQTMs
ENSG00000167258	cg01341751	CDK12	chr17	8.6283	1.38213	2.58e-05	4.74e-05	-631747	Positive	protein_coding	-34943	Distal non-target gene eQTMs
ENSG00000278834	cg17745602	RP11-458J1.1	chr17	0.874232	0.0657184	4.9e-19	3.37e-18	335828	Positive	antisense	-24839	Distal non-target gene eQTMs
ENSG00000153944	cg06551697	MSI2	chr17	56.6958	4.5347	3.76e-18	2.37e-17	-1279150	Positive	protein_coding	-15164	Distal non-target gene eQTMs
ENSG00000005379	cg06551697	TSPOAP1	chr17	-10.1897	1.1547	1.36e-10	4.1e-10	233773	Negative	protein_coding	-15164	Distal non-target gene eQTMs
ENSG00000108384	cg06551697	RAD51C	chr17	1.49249	0.208004	4.67e-07	1.02e-06	157572	Negative	protein_coding	-15164	Distal non-target gene eQTMs
ENSG00000175175	cg06551697	PPM1E	chr17	6.57013	1.46831	0.00804552	0.0112777	220853	Negative	protein_coding	-15164	Distal non-target gene eQTMs
ENSG00000108830	cg27063449	RND2	chr17	3.18089	0.537282	0.00017633	0.0002975	-378624	Positive	protein_coding	-14656	Distal non-target gene eQTMs
ENSG00000264112	cg22174693	RP11-159D12.2	chr17	-25.5766	2.43563	7.9e-14	3.24e-13	543231	Negative	lincRNA	-12433	Distal non-target gene eQTMs
ENSG00000163597	cg24321297	SNHG16	chr17	-9.05846	1.37358	1.04e-05	1.99e-05	-23544	Negative	processed_transcript	-11516	Distal non-target gene eQTMs
ENSG00000141298	cg14355889	SSH2	chr17	-5.83442	0.380109	5.44e-23	5.68e-22	-476934	Positive	protein_coding	-8521	Distal non-target gene eQTMs
ENSG00000132510	cg19364064	KDM6B	chr17	-27.9207	2.42607	3.86e-14	1.63e-13	189119	Positive	protein_coding	-4158	Distal non-target gene eQTMs
ENSG00000272884	cg00458274	RP11-104H15.10	chr17	-1.21306	0.220315	0.00223588	0.00335601	-567216	Negative	processed_transcript	-4128	Distal non-target gene eQTMs
ENSG00000263069	cg17346145	CTD-2047H16.4	chr17	-16.0219	1.46305	4.67e-13	1.78e-12	-570080	Negative	antisense	-3616	Distal non-target gene eQTMs
ENSG00000278864	cg27223681	RP11-45M22.2	chr17	-2.3425	0.183741	1.06e-19	7.82e-19	136321	Positive	TEC	-2638	Distal non-target gene eQTMs
ENSG00000092931	cg05147273	MFSD11	chr17	-9.39057	0.659905	8.54e-22	7.82e-21	35143	Positive	protein_coding	3005	Distal non-target gene eQTMs
ENSG00000214140	cg05147273	PRCD	chr17	-63.6491	6.14018	1.62e-12	5.85e-12	-173136	Negative	protein_coding	3005	Distal non-target gene eQTMs
ENSG00000267128	cg05147273	RP11-449J21.5	chr17	0.591454	0.053643	1.31e-10	3.95e-10	-562290	Positive	antisense	3005	Distal non-target gene eQTMs
ENSG00000167874	cg27579313	TMEM88	chr17	1.20164	0.105867	8.54e-11	2.62e-10	376762	Positive	protein_coding	3029	Distal non-target gene eQTMs
ENSG00000141505	cg27579313	ASGR1	chr17	9.2428	0.643168	7.65e-10	2.16e-09	304872	Positive	protein_coding	3029	Distal non-target gene eQTMs
ENSG00000179094	cg27579313	PER1	chr17	45.9341	6.16736	4.43e-06	8.77e-06	-662169	Negative	protein_coding	3029	Distal non-target gene eQTMs
ENSG00000179477	cg27579313	ALOX12B	chr17	0.260084	0.0333828	8.81e-06	1.7e-05	-594333	Positive	protein_coding	3029	Distal non-target gene eQTMs
ENSG00000267160	cg27349746	RP11-1072C15.4	chr17	-0.794582	0.183515	0.0281849	0.03677	-455339	Positive	antisense	3051	Distal non-target gene eQTMs
ENSG00000219200	cg01697794	RNASEK	chr17	13.6886	1.01355	1.82e-19	1.31e-18	-201389	Positive	protein_coding	3319	Distal non-target gene eQTMs
ENSG00000182224	cg01697794	CYB5D1	chr17	-15.97	1.29498	3.08e-16	1.6e-15	643940	Positive	protein_coding	3319	Distal non-target gene eQTMs
ENSG00000141485	cg03613822	SLC13A5	chr17	1.65365	0.212873	7.13e-07	1.53e-06	527108	Positive	protein_coding	5304	Distal non-target gene eQTMs
ENSG00000266236	cg09655341	NARF-IT1	chr17	-0.340192	0.0437799	5.31e-07	1.15e-06	831028	Positive	sense_intronic	12042	Distal non-target gene eQTMs
ENSG00000174282	cg27380288	ZBTB4	chr17	-33.4251	3.07822	1.49e-13	5.94e-13	531017	Negative	protein_coding	12211	Distal non-target gene eQTMs
ENSG00000187838	cg27380288	TMEM256-PLSCR3	chr17	-1.41552	0.13749	3.85e-13	1.48e-12	600656	Negative	protein_coding	12211	Distal non-target gene eQTMs
ENSG00000170037	cg27380288	CNTROB	chr17	-3.84133	0.667537	0.00019317	0.00032438	-58282	Negative	protein_coding	12211	Distal non-target gene eQTMs
ENSG00000141219	cg27065254	C17orf80	chr17	14.4822	1.39376	6.02e-14	2.5e-13	-60960	Positive	protein_coding	18982	Distal non-target gene eQTMs
ENSG00000178127	cg07376838	NDUFV2	chr18	11.2342	1.36189	1.67e-09	4.59e-09	-34811	Negative	protein_coding	-34811	Distal target gene eQTMs
ENSG00000180011	cg06615609	ZADH2	chr18	37.4002	4.68308	1.27e-08	3.21e-08	21633	Positive	protein_coding	-7398	Distal target gene eQTMs
ENSG00000168675	cg01597553	LDLRAD4	chr18	-28.3332	3.66383	5.89e-08	1.4e-07	-1728	Negative	protein_coding	-1728	Promoter-eQTMs
ENSG00000074657	cg03096126	ZNF532	chr18	-15.3439	3.55872	0.0137452	0.0186672	-1327	Negative	protein_coding	-1327	Promoter-eQTMs
ENSG00000101745	cg07376838	ANKRD12	chr18	34.5017	4.85803	1.03e-06	2.17e-06	-1213	Positive	protein_coding	-1213	Promoter-eQTMs
ENSG00000272788	cg12171863	RP11-674N23.4	chr18	-0.347983	0.0386183	3.93e-11	1.24e-10	97120	Negative	sense_intronic	97120	Distal target gene eQTMs
ENSG00000154065	cg18519927	ANKRD29	chr18	7.59701	1.24082	2.28e-05	4.21e-05	-463486	Positive	protein_coding	-876	Promoter non-target gene eQTMs
ENSG00000134444	cg13506219	KIAA1468	chr18	-19.0525	1.49851	3.69e-18	2.33e-17	-339352	Positive	protein_coding	-282	Promoter non-target gene eQTMs
ENSG00000267228	cg16366656	RP11-49K24.6	chr18	-0.837041	0.0673158	6.42e-19	4.35e-18	823026	Negative	protein_coding	-68	Promoter non-target gene eQTMs
ENSG00000176641	cg12132949	RNF152	chr18	-22.6287	2.05259	4.91e-16	2.5e-15	907430	Negative	protein_coding	-47	Promoter non-target gene eQTMs
ENSG00000167216	cg00147225	KATNAL2	chr18	-1.50441	0.196554	9.37e-08	2.18e-07	-994832	Negative	protein_coding	180	Promoter non-target gene eQTMs
ENSG00000215421	cg16064518	ZNF407	chr18	3.95528	0.430751	4.44e-11	1.4e-10	-611160	Positive	protein_coding	318	Promoter non-target gene eQTMs
ENSG00000017797	cg02901728	RALBP1	chr18	11.3806	1.72255	1.6e-06	3.31e-06	770285	Positive	protein_coding	937	Promoter non-target gene eQTMs
ENSG00000141428	cg19230680	C18orf21	chr18	5.98635	0.742912	1.04e-09	2.9e-09	-365431	Positive	protein_coding	-40342	Distal non-target gene eQTMs
ENSG00000265413	cg24262206	RP11-789C17.1	chr18	-0.228644	0.025341	6.48e-11	2.01e-10	-737765	Negative	sense_intronic	-37982	Distal non-target gene eQTMs
ENSG00000198796	cg02937343	ALPK2	chr18	-5.82498	0.900458	5.41e-05	9.62e-05	413970	Negative	protein_coding	-32617	Distal non-target gene eQTMs
ENSG00000153391	cg09077048	INO80C	chr18	2.69712	0.613597	0.00875075	0.012204	861978	Positive	protein_coding	-16494	Distal non-target gene eQTMs
ENSG00000270112	cg18864914	RP11-742D12.2	chr18	0.257251	0.0339036	7.94e-08	1.86e-07	658015	Positive	processed_transcript	5862	Distal non-target gene eQTMs
ENSG00000105507	cg04937172	CABP5	chr19	-37.6958	6.06948	1.92e-05	3.57e-05	14662	Negative	protein_coding	-562	Promoter-eQTMs
ENSG00000141905	cg25834275	NFIC	chr19	-61.2	2.0881	2.33e-48	7.73e-46	-45408	Negative	protein_coding	-248	Promoter-eQTMs
ENSG00000125734	cg12024887	GPR108	chr19	-8.82124	1.04063	3.5e-09	9.32e-09	7565	Negative	protein_coding	124	Promoter-eQTMs
ENSG00000012061	cg20467502	ERCC1	chr19	-7.89792	1.26205	1.99e-05	3.7e-05	21317	Negative	protein_coding	50178	Distal target gene eQTMs
ENSG00000187650	cg11696861	VMAC	chr19	1.15847	0.12815	1.8e-09	4.92e-09	-835128	Positive	protein_coding	-2383	Promoter non-target gene eQTMs
ENSG00000161091	cg09467605	MFSD12	chr19	-7.79798	0.542316	1.92e-21	1.68e-20	-752771	Negative	protein_coding	-2119	Promoter non-target gene eQTMs
ENSG00000065717	cg09467605	TLE2	chr19	-12.326	0.853017	2.09e-20	1.65e-19	-212149	Negative	protein_coding	-2119	Promoter non-target gene eQTMs
ENSG00000176490	cg09467605	DIRAS1	chr19	-13.2019	1.23468	2.24e-12	7.98e-12	70923	Negative	protein_coding	-2119	Promoter non-target gene eQTMs
ENSG00000174886	cg18732869	NDUFA11	chr19	12.253	1.02373	1.22e-17	7.32e-17	848393	Negative	protein_coding	-2066	Promoter non-target gene eQTMs
ENSG00000104883	cg18732869	PEX11G	chr19	0.681689	0.0530354	1.77e-17	1.04e-16	-737206	Positive	protein_coding	-2066	Promoter non-target gene eQTMs
ENSG00000174788	cg18732869	PCP2	chr19	36.9595	2.89379	3e-14	1.28e-13	-891942	Negative	protein_coding	-2066	Promoter non-target gene eQTMs
ENSG00000171773	cg03630771	NXNL1	chr19	-10.8848	2.51029	0.0264781	0.0346786	-207489	Negative	protein_coding	-1996	Promoter non-target gene eQTMs
ENSG00000130475	cg02576503	FCHO1	chr19	-4.98009	0.337633	3.71e-22	3.53e-21	277097	Negative	protein_coding	-1852	Promoter non-target gene eQTMs
ENSG00000269044	cg02576503	CTC-429P9.3	chr19	-4.09336	0.47664	1.14e-09	3.17e-09	836824	Negative	sense_intronic	-1852	Promoter non-target gene eQTMs
ENSG00000105245	cg21070656	NUMBL	chr19	-7.86062	0.501254	2.9e-24	3.5e-23	598382	Positive	protein_coding	-1791	Promoter non-target gene eQTMs
ENSG00000028277	cg21070656	POU2F2	chr19	-2.45506	0.183425	4.64e-19	3.2e-18	-821823	Negative	protein_coding	-1791	Promoter non-target gene eQTMs
ENSG00000076928	cg21070656	ARHGEF1	chr19	-14.2077	1.36557	7.56e-14	3.1e-13	618874	Negative	protein_coding	-1791	Promoter non-target gene eQTMs
ENSG00000090013	cg21070656	BLVRB	chr19	-2.75055	0.259413	4.14e-13	1.58e-12	816522	Negative	protein_coding	-1791	Promoter non-target gene eQTMs
ENSG00000104960	cg22215202	PTOV1	chr19	-78.0188	7.75288	4.25e-13	1.62e-12	32532	Negative	protein_coding	-827	Promoter non-target gene eQTMs
ENSG00000087088	cg22215202	BAX	chr19	-3.85836	0.689044	0.00043591	0.00070778	-863388	Negative	protein_coding	-827	Promoter non-target gene eQTMs
ENSG00000129911	cg13970591	KLF16	chr19	34.2655	2.14332	1.95e-22	1.92e-21	-361109	Positive	protein_coding	-543	Promoter non-target gene eQTMs
ENSG00000197380	cg24904303	DACT3	chr19	2.85621	0.284767	1.2e-11	4e-11	466243	Positive	protein_coding	-520	Promoter non-target gene eQTMs
ENSG00000240616	cg07589166	RPS6P25	chr19	-0.384473	0.0371535	9.49e-13	3.51e-12	102141	Negative	processed_pseudogene	-496	Promoter non-target gene eQTMs
ENSG00000099330	cg04013959	OCEL1	chr19	-6.04973	0.658582	1.38e-10	4.16e-10	597581	Negative	protein_coding	-428	Promoter non-target gene eQTMs
ENSG00000186994	cg16056784	KANK3	chr19	-1.05705	0.0910066	1.53e-11	5.04e-11	-447912	Negative	protein_coding	-293	Promoter non-target gene eQTMs
ENSG00000176533	cg25834275	GNG7	chr19	-37.6225	2.0328	1.34e-28	2.61e-27	848592	Negative	protein_coding	-248	Promoter non-target gene eQTMs
ENSG00000104899	cg02480840	AMH	chr19	-4.73769	0.315638	1.54e-15	7.49e-15	865606	Negative	protein_coding	-176	Promoter non-target gene eQTMs
ENSG00000099625	cg02480840	CBARP	chr19	-6.2035	0.714068	0.0001545	0.00026188	155416	Negative	protein_coding	-176	Promoter non-target gene eQTMs
ENSG00000142541	cg10308934	RPL13A	chr19	-97.2234	17.5458	0.0005462	0.00087722	494100	Negative	protein_coding	-144	Promoter non-target gene eQTMs
ENSG00000214046	cg16202187	SMIM7	chr19	12.6115	1.14041	5.32e-15	2.45e-14	444936	Positive	protein_coding	-62	Promoter non-target gene eQTMs
ENSG00000125652	cg12497319	ALKBH7	chr19	5.10183	0.270563	1.18e-31	3.21e-30	-364864	Positive	protein_coding	-55	Promoter non-target gene eQTMs
ENSG00000125650	cg12497319	PSPN	chr19	0.8621	0.0844445	7.26e-12	2.47e-11	362510	Positive	protein_coding	-55	Promoter non-target gene eQTMs
ENSG00000130402	cg24957950	ACTN4	chr19	-133.165	9.74202	1.74e-18	1.14e-17	-478047	Negative	protein_coding	74	Promoter non-target gene eQTMs
ENSG00000105696	cg23474268	TMEM59L	chr19	35.6794	1.74044	6.19e-33	1.97e-31	-456470	Positive	protein_coding	99	Promoter non-target gene eQTMs
ENSG00000256771	cg23474268	ZNF253	chr19	-9.51088	1.31303	7.05e-07	1.51e-06	801986	Positive	protein_coding	99	Promoter non-target gene eQTMs
ENSG00000064547	cg23474268	LPAR2	chr19	1.048	0.136538	2.33e-06	4.74e-06	-559755	Negative	protein_coding	99	Promoter non-target gene eQTMs
ENSG00000167642	cg11439068	SPINT2	chr19	-9.57841	1.54679	5.21e-05	9.28e-05	-881621	Negative	protein_coding	114	Promoter non-target gene eQTMs
ENSG00000280106	cg13830730	CTC-523E23.3	chr19	-1.04423	0.208985	0.00552195	0.00790295	768558	Positive	TEC	423	Promoter non-target gene eQTMs
ENSG00000072958	cg01860947	AP1M1	chr19	-14.4829	0.678685	2.95e-35	1.34e-33	865648	Positive	protein_coding	615	Promoter non-target gene eQTMs
ENSG00000167461	cg01860947	RAB8A	chr19	-5.91592	0.324837	2.22e-30	5.22e-29	779959	Negative	protein_coding	615	Promoter non-target gene eQTMs
ENSG00000105357	cg22364668	MYH14	chr19	53.4711	2.16764	3.55e-41	3.41e-39	746617	Positive	protein_coding	791	Promoter non-target gene eQTMs
ENSG00000104805	cg22364668	NUCB1	chr19	36.812	2.05237	1.92e-30	4.58e-29	-541257	Positive	protein_coding	791	Promoter non-target gene eQTMs
ENSG00000010361	cg22364668	FUZ	chr19	3.72407	0.233852	2.14e-24	2.62e-23	-365300	Positive	protein_coding	791	Promoter non-target gene eQTMs
ENSG00000062822	cg08460548	POLD1	chr19	3.94842	0.233052	1.57e-27	2.72e-26	942644	Negative	protein_coding	800	Promoter non-target gene eQTMs
ENSG00000253392	cg24809037	AC006277.2	chr19	-0.317885	0.0269895	5.42e-13	2.06e-12	153848	Negative	antisense	888	Promoter non-target gene eQTMs
ENSG00000198723	cg10215729	C19orf45	chr19	2.94333	0.41925	1.35e-06	2.81e-06	756275	Positive	protein_coding	902	Promoter non-target gene eQTMs
ENSG00000197647	cg27531867	ZNF433	chr19	-4.53456	0.786825	0.00355387	0.00520885	817330	Negative	protein_coding	1889	Promoter non-target gene eQTMs
ENSG00000267309	cg27412425	CTD-2630F21.1	chr19	-0.285159	0.0486868	6.51e-05	0.00011499	787287	Positive	antisense	2165	Promoter non-target gene eQTMs
ENSG00000167676	cg20098875	PLIN4	chr19	-0.918105	0.166732	0.0030608	0.00452085	591179	Negative	protein_coding	-190279	Distal non-target gene eQTMs
ENSG00000074842	cg03673558	MYDGF	chr19	1.98941	0.263684	4.07e-07	8.92e-07	370053	Positive	protein_coding	-108347	Distal non-target gene eQTMs
ENSG00000130255	cg15673843	RPL36	chr19	8.34006	1.81524	0.0106821	0.0147315	684456	Negative	protein_coding	-87411	Distal non-target gene eQTMs
ENSG00000218891	cg09782621	ZNF579	chr19	3.06815	0.112545	4.04e-48	1.28e-45	565004	Negative	protein_coding	-75094	Distal non-target gene eQTMs
ENSG00000105063	cg09782621	PPP6R1	chr19	14.7315	0.623187	2.11e-43	2.9e-41	911999	Positive	protein_coding	-75094	Distal non-target gene eQTMs
ENSG00000063245	cg09782621	EPN1	chr19	15.7078	0.648435	7.39e-43	8.9e-41	-466552	Negative	protein_coding	-75094	Distal non-target gene eQTMs
ENSG00000261221	cg09782621	ZNF865	chr19	4.04615	0.162655	3.83e-42	4.16e-40	-536373	Negative	protein_coding	-75094	Distal non-target gene eQTMs
ENSG00000108106	cg09782621	UBE2S	chr19	5.19484	0.289159	7.92e-29	1.58e-27	742033	Negative	protein_coding	-75094	Distal non-target gene eQTMs
ENSG00000179943	cg09782621	FIZ1	chr19	3.85235	0.225522	2.06e-27	3.53e-26	550402	Positive	protein_coding	-75094	Distal non-target gene eQTMs
ENSG00000063241	cg09782621	ISOC2	chr19	1.86156	0.112754	8.69e-26	1.24e-24	688793	Negative	protein_coding	-75094	Distal non-target gene eQTMs
ENSG00000196263	cg09782621	ZNF471	chr19	-10.9938	0.78458	1.6e-20	1.28e-19	366072	Positive	protein_coding	-75094	Distal non-target gene eQTMs
ENSG00000198046	cg09782621	ZNF667	chr19	-3.26163	0.271001	5.31e-17	2.97e-16	-297547	Negative	protein_coding	-75094	Distal non-target gene eQTMs
ENSG00000269699	cg09782621	ZIM2	chr19	-0.44222	0.0416601	9.17e-15	4.13e-14	-632769	Negative	protein_coding	-75094	Distal non-target gene eQTMs
ENSG00000224420	cg21712019	ADM5	chr19	-3.98708	0.357798	8.64e-12	2.92e-11	-124421	Negative	protein_coding	-46117	Distal non-target gene eQTMs
ENSG00000198816	cg21200337	ZNF358	chr19	-31.8924	1.45149	1.1e-37	6.9e-36	-351696	Negative	protein_coding	-36755	Distal non-target gene eQTMs
ENSG00000104953	cg07723431	TLE6	chr19	-1.84514	0.30464	7.84e-05	0.00013739	932997	Negative	protein_coding	-29885	Distal non-target gene eQTMs
ENSG00000198429	cg06382294	ZNF69	chr19	-0.499937	0.0629423	1.96e-07	4.43e-07	-953398	Negative	protein_coding	-15471	Distal non-target gene eQTMs
ENSG00000124440	cg01969392	HIF3A	chr19	-42.3762	8.29681	0.00533495	0.00765339	845959	Positive	protein_coding	-14433	Distal non-target gene eQTMs
ENSG00000167645	cg06808412	YIF1B	chr19	4.70781	0.333314	1.91e-22	1.88e-21	835666	Positive	protein_coding	-13454	Distal non-target gene eQTMs
ENSG00000249709	cg05165436	ZNF564	chr19	2.92783	0.384801	2.59e-07	5.77e-07	637537	Positive	protein_coding	-12527	Distal non-target gene eQTMs
ENSG00000277744	cg19138387	CTC-435M10.12	chr19	-0.362021	0.0694093	0.00494952	0.00713131	-904988	Negative	sense_intronic	-10422	Distal non-target gene eQTMs
ENSG00000105612	cg26715644	DNASE2	chr19	3.39958	0.430066	1.16e-07	2.68e-07	-44614	Positive	protein_coding	-4884	Distal non-target gene eQTMs
ENSG00000125741	cg23902435	OPA3	chr19	-7.14752	1.16487	3.73e-05	6.75e-05	-98417	Negative	protein_coding	7644	Distal non-target gene eQTMs
ENSG00000104936	cg20467502	DMPK	chr19	-18.5364	1.46157	9.71e-17	5.31e-16	-341067	Negative	protein_coding	8004	Distal non-target gene eQTMs
ENSG00000104859	cg20467502	CLASRP	chr19	-12.5396	1.09455	1.68e-14	7.37e-14	-389605	Negative	protein_coding	8004	Distal non-target gene eQTMs
ENSG00000125744	cg20467502	RTN2	chr19	-5.14909	0.53724	5.53e-12	1.9e-11	-56644	Negative	protein_coding	8004	Distal non-target gene eQTMs
ENSG00000174521	cg09120603	TTC9B	chr19	-2.59734	0.300447	1.94e-07	4.39e-07	49955	Negative	protein_coding	9466	Distal non-target gene eQTMs
ENSG00000133275	cg21194937	CSNK1G2	chr19	-17.1723	0.708112	1.96e-42	2.19e-40	-210413	Negative	protein_coding	12564	Distal non-target gene eQTMs
ENSG00000133243	cg21194937	BTBD2	chr19	-37.617	1.50585	2.7e-42	2.95e-40	166147	Negative	protein_coding	12564	Distal non-target gene eQTMs
ENSG00000005206	cg21194937	SPPL2B	chr19	-19.7775	1.0755	5.2e-31	1.32e-29	177030	Negative	protein_coding	12564	Distal non-target gene eQTMs
ENSG00000172081	cg21194937	MOB3A	chr19	-7.12316	0.429362	3.66e-27	6.11e-26	80549	Negative	protein_coding	12564	Distal non-target gene eQTMs
ENSG00000172009	cg21194937	THOP1	chr19	-15.8136	0.984959	3.64e-25	4.83e-24	633918	Negative	protein_coding	12564	Distal non-target gene eQTMs
ENSG00000088256	cg12662638	GNA11	chr19	-22.9424	0.831719	5.51e-47	1.42e-44	-955447	Negative	protein_coding	12940	Distal non-target gene eQTMs
ENSG00000167674	cg12662638	CTB-50L17.10	chr19	-20.0521	0.82587	2.05e-41	2.01e-39	422488	Negative	protein_coding	12940	Distal non-target gene eQTMs
ENSG00000129932	cg12662638	DOHH	chr19	-3.13573	0.139769	1.05e-37	6.61e-36	558987	Positive	protein_coding	12940	Distal non-target gene eQTMs
ENSG00000104964	cg12662638	AES	chr19	-130.94	6.19506	2.78e-36	1.45e-34	996899	Negative	protein_coding	12940	Distal non-target gene eQTMs
ENSG00000167658	cg12662638	EEF2	chr19	-374.828	17.4865	6.95e-35	2.96e-33	73753	Negative	protein_coding	12940	Distal non-target gene eQTMs
ENSG00000167657	cg12662638	DAPK3	chr19	-9.19779	0.44767	1.95e-34	7.91e-33	91356	Positive	protein_coding	12940	Distal non-target gene eQTMs
ENSG00000105298	cg12662638	CACTIN	chr19	-8.70664	0.446144	2.7e-34	1.08e-32	439164	Negative	protein_coding	12940	Distal non-target gene eQTMs
ENSG00000125912	cg12662638	NCLN	chr19	-13.6611	0.678785	2.62e-33	8.92e-32	-864246	Negative	protein_coding	12940	Distal non-target gene eQTMs
ENSG00000126934	cg12662638	MAP2K2	chr19	-28.7113	1.53021	8.1e-33	2.53e-31	-40512	Negative	protein_coding	12940	Distal non-target gene eQTMs
ENSG00000167671	cg12662638	UBXN6	chr19	-34.4077	1.76469	1.33e-32	4.03e-31	-395190	Positive	protein_coding	12940	Distal non-target gene eQTMs
ENSG00000077463	cg12662638	SIRT6	chr19	-4.27215	0.224031	1.59e-32	4.79e-31	-124300	Positive	protein_coding	12940	Distal non-target gene eQTMs
ENSG00000141985	cg12662638	SH3GL1	chr19	-9.55886	0.526624	3.86e-30	8.82e-29	-310561	Negative	protein_coding	12940	Distal non-target gene eQTMs
ENSG00000105325	cg12662638	FZR1	chr19	-22.1547	1.2287	5.26e-30	1.18e-28	-543536	Negative	protein_coding	12940	Distal non-target gene eQTMs
ENSG00000008382	cg12662638	MPND	chr19	-2.42517	0.200773	6.01e-16	3.04e-15	293718	Positive	protein_coding	12940	Distal non-target gene eQTMs
[truncated: 601 more rows]
