# Supplementary material for: QTL mapping of human retina DNA methylation identifies 87 gene-epigenome interactions in age-related macular degeneration
Source: Nat Commun. 2024 Mar 4;15:1972. doi: 10.1038/s41467-024-46063-8 (PMC10912779; doi:10.1038/s41467-024-46063-8)
Supplement: Supplementary file 36 — Supplementary Data 33 [file 41467_2024_46063_MOESM36_ESM.xlsx]

## Sheet: SMR_mQTLs_CRE
chr	exposure	trait	top_snp	bxy	bxy_se	bxy_pval	heidi_pval	AMD locus	HEIDI_Pvalue_Significant	Target gene
chr7	cg11712338	AMD	rs3214376	-0.290941	0.0575502	4.29406e-07	0.717891	KMT2E/SRPK2	TRUE	KMT2E, LINC01004
chr10	cg17875135	AMD	rs1810391	1.49465	0.278743	8.22488e-08	0.106338	ARMS2/HTRA1	TRUE	HTRA1
chr10	cg06241170	AMD	rs4752700	2.07101	0.360489	9.19105e-09	0.339161	ARMS2/HTRA1	TRUE	HTRA1

## Sheet: SMR_mQTLs_SE
chr	exposure	trait	top_snp	bxy	bxy_se	bxy_pval	heidi_pval	AMD locus	HEIDI_Pvalue_Significant	Target gene
chr10	cg17875135	AMD	rs1810391	1.49465	0.278743	8.22488e-08	0.106338	ARMS2/HTRA1	TRUE	HTRA1
chr10	cg06241170	AMD	rs4752700	2.07101	0.360489	9.19105e-09	0.339161	ARMS2/HTRA1	TRUE	HTRA1

## Sheet: SMR_mQTLs_Loops
chr	exposure	trait	top_snp	bxy	bxy_se	bxy_pval	heidi_pval	AMD locus	HEIDI_Pvalue_Significant	Target gene
chr7	cg11712338	AMD	rs3214376	-0.290941	0.0575502	4.29406e-07	0.717891	KMT2E/SRPK2	TRUE	KMT2E, LINC01004
