# Supplementary material for: QTL mapping of human retina DNA methylation identifies 87 gene-epigenome interactions in age-related macular degeneration
Source: Nat Commun. 2024 Mar 4;15:1972. doi: 10.1038/s41467-024-46063-8 (PMC10912779; doi:10.1038/s41467-024-46063-8)
Supplement: Supplementary file 37 — Supplementary Data 34 [file 41467_2024_46063_MOESM37_ESM.xlsx]

## Sheet: SMR_eQTLs_CRE
chr	exposure	trait	top_snp	external_gene_name	bxy	bxy_se	bxy_pval	heidi_pval	AMD locus	HEIDI_Pvalue_Significant	Identified in Ratnapriya et. al	Target gene based on CRE
chr7	ENSG00000242294	AMD	rs111344110	STAG3L5P	0.0107801	0.00200756	7.88592e-08	0.140171	PILRB/PILRA	TRUE	No	STAG3L5P
chr12	ENSG00000135441	AMD	rs3138141	BLOC1S1	0.0537297	0.0107963	6.46868e-07	0.301843	RDH5/CD63	TRUE	Yes	BLOC1S1
