# Supplementary material for: QTL mapping of human retina DNA methylation identifies 87 gene-epigenome interactions in age-related macular degeneration
Source: Nat Commun. 2024 Mar 4;15:1972. doi: 10.1038/s41467-024-46063-8 (PMC10912779; doi:10.1038/s41467-024-46063-8)
Supplement: Supplementary file 38 — Supplementary Data 35 [file 41467_2024_46063_MOESM38_ESM.xlsx]

## Sheet: eCAVIAR_mQTLs_CRE
CpG	Target genes	Lead variant	AMD loci	Target gene based on CRE
cg22753919	ARHGAP21,RNA5SP305	rs12357257	ARHGAP21	ARHGAP21

## Sheet: eCAVIAR_mQTLs_Loops
CpG	Target genes	Lead variant	AMD loci	Target gene based on CRE
cg11712338	LINC01004	rs1142	KMT2E/SRPK2	KMT2E, LINC01004
