# Supplementary material for: QTL mapping of human retina DNA methylation identifies 87 gene-epigenome interactions in age-related macular degeneration
Source: Nat Commun. 2024 Mar 4;15:1972. doi: 10.1038/s41467-024-46063-8 (PMC10912779; doi:10.1038/s41467-024-46063-8)
Supplement: Supplementary file 39 — Supplementary Data 36 [file 41467_2024_46063_MOESM39_ESM.xlsx]

## Sheet: E2M_SMR_CRE
Chr	exposure	trait	top_snp	Gene	bxy	bxy_se	bxy_pval	heidi_pval	Biotype	HEIDI_Pvalue_Significant	Target gene based on CRE
chr1	ENSG00000274895	cg14810798	rs66760546	AC011700.1	-0.0723106	0.00906861	1.53962e-15	0.146073	lncRNA	TRUE	RP11-478J18.2
chr1	ENSG00000274895	cg24083324	rs66760546	AC011700.1	0.069296	0.00971955	1.00696e-12	0.166785	lncRNA	TRUE	RP11-478J18.2
chr1	ENSG00000274895	cg05052969	rs66760546	AC011700.1	-0.0670225	0.0120128	2.41533e-08	0.30854	lncRNA	TRUE	RP11-478J18.2
chr1	ENSG00000223649	cg04923746	rs10863899	AC105275.1	-1.63299	0.247466	4.14418e-11	0.507953	lncRNA	TRUE	RP11-359E8.3
chr1	ENSG00000223649	cg06753273	rs10863899	AC105275.1	-2.31885	0.361309	1.38136e-10	0.177084	lncRNA	TRUE	RP11-359E8.3
chr1	ENSG00000223649	cg00658007	rs10863899	AC105275.1	-2.0783	0.324953	1.59824e-10	0.122037	lncRNA	TRUE	RP11-359E8.3
chr1	ENSG00000223649	cg24484971	rs10863899	AC105275.1	-1.42488	0.236965	1.82087e-09	0.304203	lncRNA	TRUE	RP11-359E8.3
chr1	ENSG00000271853	cg08477332	rs28510471	AL162258.1	-4.24204	0.714501	2.90165e-09	0.227791	lncRNA	TRUE	RP1-178F15.5
chr1	ENSG00000271853	cg16348003	rs28510471	AL162258.1	-1.27755	0.239066	9.09675e-08	0.509332	lncRNA	TRUE	RP1-178F15.5
chr1	ENSG00000271853	cg01347250	rs28510471	AL162258.1	-1.14357	0.220642	2.18458e-07	0.843295	lncRNA	TRUE	RP1-178F15.5
chr1	ENSG00000271853	cg04077668	rs28510471	AL162258.1	-0.801918	0.15652	3.00056e-07	0.629023	lncRNA	TRUE	RP1-178F15.5
chr1	ENSG00000272195	cg08289927	rs61844237	AL356512.1	-0.419152	0.0839516	5.95155e-07	0.354612	lncRNA	TRUE	RP11-156E8.1
chr1	ENSG00000162551	cg22943875	rs1256344	ALPL	-0.0377183	0.00440448	1.09374e-17	0.644244	protein_coding	TRUE	ALPL
chr1	ENSG00000162551	cg12062270	rs1256344	ALPL	-0.04148	0.0048504	1.21101e-17	0.33334	protein_coding	TRUE	ALPL
chr1	ENSG00000162551	cg06346857	rs1256344	ALPL	-0.0211645	0.00333059	2.09015e-10	0.124218	protein_coding	TRUE	ALPL
chr1	ENSG00000162551	cg01037895	rs1256344	ALPL	-0.0151802	0.00240217	2.62662e-10	0.101303	protein_coding	TRUE	ALPL
chr1	ENSG00000181754	cg23387929	rs2570972	AMIGO1	-0.0263186	0.00518351	3.82696e-07	0.0615627	protein_coding	TRUE	AMIGO1
chr1	ENSG00000235098	cg15633699	rs3766165	ANKRD65	-0.341625	0.0650236	1.48948e-07	0.886776	protein_coding	TRUE	ANKRD65
chr1	ENSG00000235098	cg04232698	rs3766165	ANKRD65	0.419483	0.0846349	7.18164e-07	0.0902979	protein_coding	TRUE	ANKRD65
chr1	ENSG00000130770	cg10110780	rs6691903	ATP5IF1	-0.222274	0.0159225	2.74309e-44	0.165423	protein_coding	TRUE	ATPIF1
chr1	ENSG00000130770	cg04993605	rs6691903	ATP5IF1	-0.192171	0.0142943	3.34154e-41	0.390983	protein_coding	TRUE	ATPIF1
chr1	ENSG00000130770	cg11975685	rs6691903	ATP5IF1	-0.0582011	0.00617099	4.04625e-21	0.264609	protein_coding	TRUE	ATPIF1
chr1	ENSG00000130770	cg05045517	rs6691903	ATP5IF1	-0.0370018	0.00428289	5.64877e-18	0.167505	protein_coding	TRUE	ATPIF1
chr1	ENSG00000130770	cg14852267	rs6691903	ATP5IF1	-0.0289898	0.00378334	1.8235e-14	0.47419	protein_coding	TRUE	ATPIF1
chr1	ENSG00000130770	cg07913096	rs6691903	ATP5IF1	-0.0312191	0.00414654	5.11455e-14	0.149706	protein_coding	TRUE	ATPIF1
chr1	ENSG00000130770	cg07148744	rs6691903	ATP5IF1	-0.0231777	0.00329493	2.00174e-12	0.293837	protein_coding	TRUE	ATPIF1
chr1	ENSG00000130770	cg26058965	rs6691903	ATP5IF1	-0.0241647	0.00367549	4.88049e-11	0.27844	protein_coding	TRUE	ATPIF1
chr1	ENSG00000130770	cg21577315	rs6691903	ATP5IF1	-0.0116711	0.00190405	8.80845e-10	0.10243	protein_coding	TRUE	ATPIF1
chr1	ENSG00000130770	cg15374471	rs6691903	ATP5IF1	-0.0128404	0.00215609	2.59398e-09	0.797522	protein_coding	TRUE	ATPIF1
chr1	ENSG00000162779	cg00255405	rs16853998	AXDND1	0.612249	0.10281	2.59814e-09	0.620754	protein_coding	TRUE	AXDND1
chr1	ENSG00000134690	cg12339802	rs2306626	CDCA8	-3.68759	0.583202	2.56536e-10	0.564328	protein_coding	TRUE	CDCA8
chr1	ENSG00000134690	cg24088508	rs2306626	CDCA8	-4.20951	0.667972	2.93969e-10	0.40793	protein_coding	TRUE	CDCA8
chr1	ENSG00000134690	cg06917450	rs2306626	CDCA8	-2.48723	0.397789	4.03618e-10	0.659574	protein_coding	TRUE	CDCA8
chr1	ENSG00000134690	cg27170260	rs2306626	CDCA8	-2.1334	0.352751	1.46766e-09	0.502171	protein_coding	TRUE	CDCA8
chr1	ENSG00000143578	cg06600967	rs6661009	CREB3L4	-0.226483	0.0432914	1.68048e-07	0.364714	protein_coding	TRUE	CREB3L4
chr1	ENSG00000163354	cg19352308	rs11264297	DCST2	0.0536606	0.00848632	2.5622e-10	0.0792896	protein_coding	TRUE	DCST2
chr1	ENSG00000163354	cg21504176	rs11264297	DCST2	0.0359858	0.00646893	2.65374e-08	0.593431	protein_coding	TRUE	DCST2
chr1	ENSG00000162616	cg24795785	rs41311176	DNAJB4	-0.0498258	0.00851308	4.83211e-09	0.423554	protein_coding	TRUE	DNAJB4
chr1	ENSG00000162616	cg09148021	rs41311176	DNAJB4	-0.0727322	0.0136886	1.07644e-07	0.319782	protein_coding	TRUE	DNAJB4
chr1	ENSG00000116157	cg06612871	rs11810754	GPX7	1.91156	0.359914	1.08931e-07	0.395827	protein_coding	TRUE	GPX7
chr1	ENSG00000049239	cg09122657	rs9435144	H6PD	-0.0568457	0.00761526	8.34844e-14	0.750534	protein_coding	TRUE	H6PD
chr1	ENSG00000049239	cg23913482	rs9435144	H6PD	-0.0398165	0.00713778	2.42925e-08	0.78297	protein_coding	TRUE	H6PD
chr1	ENSG00000162669	cg27594756	rs17131429	HFM1	0.0961226	0.0124668	1.25528e-14	0.165623	protein_coding	TRUE	HFM1
chr1	ENSG00000162669	cg10890233	rs17131429	HFM1	0.0790239	0.0125036	2.61369e-10	0.0816259	protein_coding	TRUE	HFM1
chr1	ENSG00000162669	cg09737265	rs17131429	HFM1	-0.0668578	0.0107583	5.14758e-10	0.650853	protein_coding	TRUE	HFM1
chr1	ENSG00000162669	cg09077757	rs17131429	HFM1	-0.0795177	0.0161559	8.57079e-07	0.138298	protein_coding	TRUE	HFM1
chr1	ENSG00000185436	cg08700651	rs12094257	IFNLR1	-0.161744	0.0329333	9.04921e-07	0.778235	protein_coding	TRUE	IFNLR1
chr1	ENSG00000143198	cg08510884	rs4147592	MGST3	-0.0611698	0.00811757	4.86533e-14	0.407149	protein_coding	TRUE	MGST3
chr1	ENSG00000143198	cg21165486	rs4147592	MGST3	-0.0300514	0.00579242	2.125e-07	0.254313	protein_coding	TRUE	MGST3
chr1	ENSG00000242485	cg18546249	rs34442823	MRPL20	0.150978	0.023519	1.36821e-10	0.247076	protein_coding	TRUE	MRPL20
chr1	ENSG00000242485	cg05397857	rs34442823	MRPL20	0.151088	0.0254658	2.97476e-09	0.422399	protein_coding	TRUE	MRPL20
chr1	ENSG00000242485	cg02416993	rs34442823	MRPL20	-0.146338	0.0257591	1.33882e-08	0.61785	protein_coding	TRUE	MRPL20
chr1	ENSG00000242485	cg20411340	rs34442823	MRPL20	-0.146744	0.0290639	4.44059e-07	0.0864591	protein_coding	TRUE	MRPL20
chr1	ENSG00000242485	cg09331144	rs34442823	MRPL20	-0.196696	0.0397498	7.48435e-07	0.0916639	protein_coding	TRUE	MRPL20
chr1	ENSG00000162910	cg13294652	rs849749	MRPL55	-0.866181	0.163959	1.27142e-07	0.339642	protein_coding	TRUE	MRPL55
chr1	ENSG00000162910	cg01200585	rs849749	MRPL55	0.800631	0.15706	3.43953e-07	0.227159	protein_coding	TRUE	MRPL55
chr1	ENSG00000117640	cg24596570	rs2294226	MTFR1L	-0.0391982	0.00495561	2.5766e-15	0.912905	protein_coding	TRUE	MTFR1L
chr1	ENSG00000228288	cg20677516	rs72442869	PCAT6	-0.12593	0.0176104	8.62388e-13	0.869444	lncRNA	TRUE	PCAT6
chr1	ENSG00000228288	cg24880665	rs72442869	PCAT6	-0.130538	0.0261233	5.82322e-07	0.557985	lncRNA	TRUE	PCAT6
chr1	ENSG00000142655	cg01834541	rs2506896	PEX14	-0.0977258	0.0102252	1.20863e-21	0.576668	protein_coding	TRUE	PEX14
chr1	ENSG00000142655	cg23863608	rs2506896	PEX14	-0.0592739	0.00660933	3.01388e-19	0.693452	protein_coding	TRUE	PEX14
chr1	ENSG00000142655	cg12830684	rs2506896	PEX14	-0.0999572	0.0113855	1.64448e-18	0.814565	protein_coding	TRUE	PEX14
chr1	ENSG00000142655	cg26362368	rs2506896	PEX14	-0.0958687	0.0110061	3.02569e-18	0.728882	protein_coding	TRUE	PEX14
chr1	ENSG00000142655	cg23987244	rs2506896	PEX14	-0.0867719	0.0100879	7.86114e-18	0.739785	protein_coding	TRUE	PEX14
chr1	ENSG00000142655	cg12806121	rs2506896	PEX14	-0.0734506	0.00871515	3.51847e-17	0.910918	protein_coding	TRUE	PEX14
chr1	ENSG00000142655	cg09319435	rs2506896	PEX14	-0.0461569	0.00553019	7.0404e-17	0.878593	protein_coding	TRUE	PEX14
chr1	ENSG00000142655	cg04607379	rs2506896	PEX14	-0.0656294	0.00794752	1.48327e-16	0.773863	protein_coding	TRUE	PEX14
chr1	ENSG00000142655	cg04585221	rs2506896	PEX14	-0.0784188	0.00964716	4.33946e-16	0.85032	protein_coding	TRUE	PEX14
chr1	ENSG00000142655	cg01849851	rs2506896	PEX14	-0.0944408	0.0119109	2.21017e-15	0.464528	protein_coding	TRUE	PEX14
chr1	ENSG00000142655	cg24294013	rs2506896	PEX14	-0.0754392	0.00954898	2.78379e-15	0.759664	protein_coding	TRUE	PEX14
chr1	ENSG00000142655	cg07357157	rs2506896	PEX14	-0.0384331	0.00487672	3.2496e-15	0.474389	protein_coding	TRUE	PEX14
chr1	ENSG00000142655	cg01063935	rs2506896	PEX14	-0.0671247	0.00852418	3.41776e-15	0.342464	protein_coding	TRUE	PEX14
chr1	ENSG00000142655	cg15554126	rs2506896	PEX14	-0.0476992	0.00607742	4.20751e-15	0.678788	protein_coding	TRUE	PEX14
chr1	ENSG00000142655	cg05454781	rs2506896	PEX14	-0.0423388	0.00543605	6.7802e-15	0.491094	protein_coding	TRUE	PEX14
chr1	ENSG00000142655	cg27571230	rs2506896	PEX14	0.0528832	0.00679131	6.86795e-15	0.243499	protein_coding	TRUE	PEX14
chr1	ENSG00000142655	cg23975251	rs2506896	PEX14	-0.0731324	0.00953035	1.67202e-14	0.663375	protein_coding	TRUE	PEX14
chr1	ENSG00000142655	cg12944311	rs2506896	PEX14	-0.0536202	0.00788666	1.05463e-11	0.904497	protein_coding	TRUE	PEX14
chr1	ENSG00000142655	cg27182133	rs2506896	PEX14	-0.0365801	0.00601736	1.20857e-09	0.714309	protein_coding	TRUE	PEX14
chr1	ENSG00000142655	cg23072051	rs2506896	PEX14	-0.0293882	0.00533745	3.67022e-08	0.226633	protein_coding	TRUE	PEX14
chr1	ENSG00000142655	cg07555102	rs2506896	PEX14	-0.0271189	0.00494921	4.26706e-08	0.287478	protein_coding	TRUE	PEX14
chr1	ENSG00000142655	cg21931713	rs2506896	PEX14	-0.0232426	0.00436457	1.008e-07	0.822473	protein_coding	TRUE	PEX14
chr1	ENSG00000142655	cg16057915	rs2506896	PEX14	-0.0510103	0.0102541	6.5373e-07	0.285249	protein_coding	TRUE	PEX14
chr1	ENSG00000117461	cg04181682	rs1416706	PIK3R3	-0.0627142	0.00530034	2.66413e-32	0.86005	protein_coding	TRUE	PIK3R3
chr1	ENSG00000117461	cg27584146	rs1416706	PIK3R3	-0.0497465	0.00511807	2.48303e-22	0.608938	protein_coding	TRUE	PIK3R3
chr1	ENSG00000117461	cg26011752	rs1416706	PIK3R3	-0.0267338	0.0028759	1.46062e-20	0.753907	protein_coding	TRUE	PIK3R3
chr1	ENSG00000117461	cg06974930	rs1416706	PIK3R3	-0.0237072	0.0030383	6.05665e-15	0.24361	protein_coding	TRUE	PIK3R3
chr1	ENSG00000117461	cg12978857	rs1416706	PIK3R3	-0.02229	0.00309615	6.05499e-13	0.524555	protein_coding	TRUE	PIK3R3
chr1	ENSG00000117461	cg20630926	rs1416706	PIK3R3	-0.0256174	0.0036236	1.55385e-12	0.640038	protein_coding	TRUE	PIK3R3
chr1	ENSG00000117461	cg20650505	rs1416706	PIK3R3	-0.014562	0.00227546	1.55795e-10	0.0584194	protein_coding	TRUE	PIK3R3
chr1	ENSG00000117461	cg14122995	rs1416706	PIK3R3	-0.0173726	0.00336959	2.52685e-07	0.441602	protein_coding	TRUE	PIK3R3
chr1	ENSG00000143157	cg18267943	rs7548191	POGK	-0.0265904	0.00529087	5.01546e-07	0.515337	protein_coding	TRUE	POGK
chr1	ENSG00000230461	cg14810798	rs235924	PROX1-AS1	-0.0571396	0.00864162	3.7881e-11	0.673083	lncRNA	TRUE	PROX1-AS1
chr1	ENSG00000230461	cg24083324	rs235924	PROX1-AS1	0.0448074	0.00869038	2.52307e-07	0.312152	lncRNA	TRUE	PROX1-AS1
chr1	ENSG00000085491	cg05918124	rs61799378	SLC25A24	-0.12192	0.0174524	2.83182e-12	0.155585	protein_coding	TRUE	SLC25A24
chr1	ENSG00000085491	cg24323958	rs61799378	SLC25A24	-0.0827449	0.0137193	1.62664e-09	0.916068	protein_coding	TRUE	SLC25A24
chr1	ENSG00000085491	cg01849514	rs61799378	SLC25A24	-0.164026	0.0286012	9.75654e-09	0.549745	protein_coding	TRUE	SLC25A24
chr1	ENSG00000085491	cg06828260	rs61799378	SLC25A24	-0.0765598	0.0152176	4.87935e-07	0.379767	protein_coding	TRUE	SLC25A24
chr1	ENSG00000162461	cg03420647	rs1108185	SLC25A34	-0.668569	0.0604231	1.85893e-28	0.927245	protein_coding	TRUE	SLC25A34
chr1	ENSG00000162461	cg22956858	rs1108185	SLC25A34	-0.627037	0.0611286	1.09321e-24	0.985461	protein_coding	TRUE	SLC25A34
chr1	ENSG00000162461	cg10483611	rs1108185	SLC25A34	-0.210549	0.0244805	7.92443e-18	0.974749	protein_coding	TRUE	SLC25A34
chr1	ENSG00000227533	cg20282814	rs710221	SLC2A1-AS1	-0.0989699	0.0194183	3.45578e-07	0.189213	lncRNA	TRUE	SLC2A1-AS1
chr1	ENSG00000182004	cg06642677	rs11240607	SNRPE	0.394117	0.0606389	8.06337e-11	0.540001	protein_coding	TRUE	SNRPE
chr1	ENSG00000162782	cg08376771	rs76644806	TDRD5	-0.199399	0.0291158	7.46326e-12	0.119169	protein_coding	TRUE	TDRD5
chr1	ENSG00000162782	cg13848905	rs76644806	TDRD5	-0.311967	0.0518775	1.81518e-09	0.257823	protein_coding	TRUE	TDRD5
chr1	ENSG00000133069	cg11170025	rs1172113	TMCC2	-0.0573116	0.00958425	2.23449e-09	0.202609	protein_coding	TRUE	TMCC2
chr1	ENSG00000133069	cg10768996	rs1172113	TMCC2	-0.0481559	0.00870377	3.15234e-08	0.544424	protein_coding	TRUE	TMCC2
chr1	ENSG00000196418	cg21263208	rs10158232	ZNF124	0.382814	0.0526871	3.70855e-13	0.947984	protein_coding	TRUE	ZNF124
chr10	ENSG00000099204	cg15294435	rs7904491	ABLIM1	-0.0175263	0.00317651	3.4391e-08	0.920048	protein_coding	TRUE	ABLIM1
chr10	ENSG00000099204	cg12736146	rs7904491	ABLIM1	-0.0165595	0.00305754	6.09651e-08	0.773613	protein_coding	TRUE	ABLIM1
chr10	ENSG00000099204	cg21050356	rs7904491	ABLIM1	-0.0153895	0.00287903	9.02209e-08	0.89501	protein_coding	TRUE	ABLIM1
chr10	ENSG00000099204	cg01315572	rs7904491	ABLIM1	-0.02189	0.00410784	9.88407e-08	0.580612	protein_coding	TRUE	ABLIM1
chr10	ENSG00000099204	cg20218110	rs7904491	ABLIM1	-0.0119683	0.00226426	1.25203e-07	0.635027	protein_coding	TRUE	ABLIM1
chr10	ENSG00000099204	cg26760942	rs7904491	ABLIM1	-0.011137	0.00214661	2.12351e-07	0.956074	protein_coding	TRUE	ABLIM1
chr10	ENSG00000099204	cg18680346	rs7904491	ABLIM1	-0.0332104	0.00640228	2.13387e-07	0.973684	protein_coding	TRUE	ABLIM1
chr10	ENSG00000099204	cg01449818	rs7904491	ABLIM1	-0.00891693	0.00172556	2.3716e-07	0.88045	protein_coding	TRUE	ABLIM1
chr10	ENSG00000099204	cg03223072	rs7904491	ABLIM1	-0.00913145	0.00177553	2.70459e-07	0.730511	protein_coding	TRUE	ABLIM1
chr10	ENSG00000099204	cg08587685	rs7904491	ABLIM1	-0.0131242	0.00255189	2.70482e-07	0.172649	protein_coding	TRUE	ABLIM1
chr10	ENSG00000099204	cg18574731	rs7904491	ABLIM1	-0.00765045	0.00153737	6.48077e-07	0.791969	protein_coding	TRUE	ABLIM1
chr10	ENSG00000099204	cg19936380	rs7904491	ABLIM1	-0.00989743	0.00199958	7.43022e-07	0.979588	protein_coding	TRUE	ABLIM1
chr10	ENSG00000099204	cg06769992	rs7904491	ABLIM1	-0.00929898	0.00188113	7.68142e-07	0.673655	protein_coding	TRUE	ABLIM1
chr10	ENSG00000165322	cg04359828	rs144466157	ARHGAP12	-0.0560445	0.00485946	8.9881e-31	0.863702	protein_coding	TRUE	ARHGAP12
chr10	ENSG00000165322	cg26784012	rs144466157	ARHGAP12	-0.0470052	0.00434491	2.81474e-27	0.925554	protein_coding	TRUE	ARHGAP12
chr10	ENSG00000165322	cg18675610	rs144466157	ARHGAP12	-0.0501861	0.00482028	2.19839e-25	0.978876	protein_coding	TRUE	ARHGAP12
chr10	ENSG00000165322	cg02093006	rs144466157	ARHGAP12	-0.0304958	0.00320012	1.57928e-21	0.558729	protein_coding	TRUE	ARHGAP12
chr10	ENSG00000165322	cg21279476	rs144466157	ARHGAP12	-0.0214536	0.00244207	1.56365e-18	0.173304	protein_coding	TRUE	ARHGAP12
chr10	ENSG00000165322	cg09642378	rs144466157	ARHGAP12	-0.0297513	0.00352565	3.21365e-17	0.306942	protein_coding	TRUE	ARHGAP12
chr10	ENSG00000165322	cg22706007	rs144466157	ARHGAP12	-0.0196343	0.00319068	7.5729e-10	0.799734	protein_coding	TRUE	ARHGAP12
chr10	ENSG00000165322	cg06004637	rs144466157	ARHGAP12	-0.0136302	0.00241624	1.68989e-08	0.713897	protein_coding	TRUE	ARHGAP12
chr10	ENSG00000165322	cg23473204	rs144466157	ARHGAP12	0.0102857	0.00203731	4.44885e-07	0.229638	protein_coding	TRUE	ARHGAP12
chr10	ENSG00000214435	cg23093090	rs12416687	AS3MT	0.0698672	0.0109458	1.73613e-10	0.201227	protein_coding	TRUE	AS3MT
chr10	ENSG00000226864	cg07444487	rs10887024	ATE1-AS1	-1.58606	0.124121	2.16685e-37	0.601975	transcribed_unitary_pseudogene	TRUE	ATE1-AS1
chr10	ENSG00000226864	cg09943237	rs10887024	ATE1-AS1	-1.21453	0.0995748	3.21833e-34	0.535653	transcribed_unitary_pseudogene	TRUE	ATE1-AS1
chr10	ENSG00000226864	cg13812702	rs10887024	ATE1-AS1	-1.16127	0.0953545	4.04835e-34	0.476952	transcribed_unitary_pseudogene	TRUE	ATE1-AS1
chr10	ENSG00000226864	cg20835665	rs10887024	ATE1-AS1	-1.4062	0.115468	4.05751e-34	0.38469	transcribed_unitary_pseudogene	TRUE	ATE1-AS1
chr10	ENSG00000226864	cg27030141	rs10887024	ATE1-AS1	-1.06888	0.096101	9.75269e-29	0.468829	transcribed_unitary_pseudogene	TRUE	ATE1-AS1
chr10	ENSG00000226864	cg03417454	rs10887024	ATE1-AS1	-0.549981	0.0550505	1.67758e-23	0.646872	transcribed_unitary_pseudogene	TRUE	ATE1-AS1
chr10	ENSG00000226864	cg11364714	rs10887024	ATE1-AS1	-0.383757	0.040005	8.57775e-22	0.652085	transcribed_unitary_pseudogene	TRUE	ATE1-AS1
chr10	ENSG00000226864	cg23691251	rs10887024	ATE1-AS1	-0.109841	0.0178316	7.27768e-10	0.430803	transcribed_unitary_pseudogene	TRUE	ATE1-AS1
chr10	ENSG00000226864	cg13320271	rs10887024	ATE1-AS1	0.204841	0.0335061	9.74479e-10	0.925221	transcribed_unitary_pseudogene	TRUE	ATE1-AS1
chr10	ENSG00000183346	cg04438074	rs71490861	CABCOCO1	-0.246423	0.0383539	1.31887e-10	0.635582	protein_coding	TRUE	C10orf107
chr10	ENSG00000183346	cg11914795	rs71490861	CABCOCO1	-0.358792	0.0613376	4.93158e-09	0.142839	protein_coding	TRUE	C10orf107
chr10	ENSG00000165806	cg08245930	rs10553596	CASP7	0.0488228	0.00590543	1.36861e-16	0.334497	protein_coding	TRUE	CASP7
chr10	ENSG00000065621	cg23659134	rs7099030	GSTO2	-0.113923	0.0182221	4.05538e-10	0.711482	protein_coding	TRUE	GSTO2
chr10	ENSG00000065621	cg17383262	rs7099030	GSTO2	-0.0964144	0.0158567	1.19899e-09	0.728258	protein_coding	TRUE	GSTO2
chr10	ENSG00000065621	cg19917656	rs7099030	GSTO2	-0.0931058	0.0161055	7.42546e-09	0.717137	protein_coding	TRUE	GSTO2
chr10	ENSG00000065621	cg17733466	rs7099030	GSTO2	-0.0691575	0.0120702	1.00661e-08	0.404246	protein_coding	TRUE	GSTO2
chr10	ENSG00000065621	cg00899160	rs7099030	GSTO2	-0.0816668	0.0150132	5.33753e-08	0.604064	protein_coding	TRUE	GSTO2
chr10	ENSG00000065621	cg23245945	rs7099030	GSTO2	0.0996982	0.0184475	6.50095e-08	0.0969507	protein_coding	TRUE	GSTO2
chr10	ENSG00000065621	cg23487032	rs7099030	GSTO2	-0.0792719	0.0148147	8.75111e-08	0.705411	protein_coding	TRUE	GSTO2
chr10	ENSG00000065621	cg23126571	rs7099030	GSTO2	0.105616	0.0201652	1.6274e-07	0.0876361	protein_coding	TRUE	GSTO2
chr10	ENSG00000065621	cg06119461	rs7099030	GSTO2	0.0730949	0.0142936	3.15677e-07	0.139989	protein_coding	TRUE	GSTO2
chr10	ENSG00000065621	cg10973038	rs7099030	GSTO2	0.0676723	0.0133477	3.97912e-07	0.517785	protein_coding	TRUE	GSTO2
chr10	ENSG00000065621	cg00646492	rs7099030	GSTO2	0.0901102	0.017828	4.31708e-07	0.0823754	protein_coding	TRUE	GSTO2
chr10	ENSG00000065621	cg13766030	rs7099030	GSTO2	-0.066614	0.0133183	5.68337e-07	0.772466	protein_coding	TRUE	GSTO2
chr10	ENSG00000166033	cg16466810	rs4991294	HTRA1	-0.0135791	0.0022753	2.40107e-09	0.650275	protein_coding	TRUE	HTRA1
chr10	ENSG00000166033	cg04970100	rs4991294	HTRA1	-0.0155257	0.00279374	2.73968e-08	0.823094	protein_coding	TRUE	HTRA1
chr10	ENSG00000166033	cg21647373	rs4991294	HTRA1	-0.0148384	0.00279178	1.06641e-07	0.335265	protein_coding	TRUE	HTRA1
chr10	ENSG00000232656	cg24515221	rs3750729	IDI2-AS1	0.38702	0.0474115	3.26817e-16	0.212294	lncRNA	TRUE	IDI2-AS1
chr10	ENSG00000166228	cg07409741	rs2854614	PCBD1	-0.186979	0.0316643	3.52568e-09	0.307685	protein_coding	TRUE	PCBD1
chr10	ENSG00000166228	cg21324555	rs2854614	PCBD1	0.259019	0.0452528	1.04148e-08	0.23534	protein_coding	TRUE	PCBD1
chr10	ENSG00000166228	cg19225512	rs2854614	PCBD1	0.175273	0.0337029	1.98712e-07	0.374722	protein_coding	TRUE	PCBD1
chr10	ENSG00000120594	cg07534516	rs6482066	PLXDC2	-0.0116648	0.00122683	1.94315e-21	0.169138	protein_coding	TRUE	PLXDC2
chr10	ENSG00000120594	cg27401333	rs6482066	PLXDC2	-0.0111577	0.00138266	7.04691e-16	0.122713	protein_coding	TRUE	PLXDC2
chr10	ENSG00000120594	cg14024017	rs6482066	PLXDC2	-0.00886938	0.00114432	9.13473e-15	0.251064	protein_coding	TRUE	PLXDC2
chr10	ENSG00000120594	cg12723985	rs6482066	PLXDC2	-0.00806253	0.00110206	2.55725e-13	0.251556	protein_coding	TRUE	PLXDC2
chr10	ENSG00000120594	cg03898108	rs6482066	PLXDC2	-0.00736912	0.00102249	5.7187e-13	0.301635	protein_coding	TRUE	PLXDC2
chr10	ENSG00000120594	cg15657225	rs6482066	PLXDC2	0.00347872	0.00049506	2.11213e-12	0.0941345	protein_coding	TRUE	PLXDC2
chr10	ENSG00000120594	cg03631457	rs6482066	PLXDC2	-0.00697804	0.00110428	2.63116e-10	0.308269	protein_coding	TRUE	PLXDC2
chr10	ENSG00000148604	cg13133883	rs10736319	RGR	-0.00265027	0.000475713	2.53052e-08	0.41507	protein_coding	TRUE	RGR
chr10	ENSG00000072422	cg23892626	rs16915675	RHOBTB1	-0.0811418	0.0137252	3.38255e-09	0.176433	protein_coding	TRUE	RHOBTB1
chr10	ENSG00000072422	cg11650479	rs16915675	RHOBTB1	-0.0228317	0.00418009	4.70774e-08	0.330511	protein_coding	TRUE	RHOBTB1
chr10	ENSG00000072422	cg24836845	rs16915675	RHOBTB1	-0.0293888	0.00553586	1.10344e-07	0.640876	protein_coding	TRUE	RHOBTB1
chr10	ENSG00000079332	cg01240734	rs10999158	SAR1A	-0.113639	0.0197944	9.41274e-09	0.212103	protein_coding	TRUE	SAR1A
chr10	ENSG00000079332	cg15661580	rs10999158	SAR1A	-0.0676901	0.0130736	2.24729e-07	0.070419	protein_coding	TRUE	SAR1A
chr10	ENSG00000198964	cg14611218	rs10508930	SGMS1	-0.103397	0.00883726	1.2733e-31	0.109626	protein_coding	TRUE	SGMS1
chr10	ENSG00000198964	cg03585110	rs10508930	SGMS1	-0.101011	0.00955545	4.05763e-26	0.182982	protein_coding	TRUE	SGMS1
chr10	ENSG00000198964	cg07494431	rs10508930	SGMS1	-0.0744395	0.00740204	8.58951e-24	0.136503	protein_coding	TRUE	SGMS1
chr10	ENSG00000198964	cg13784163	rs10508930	SGMS1	-0.0556455	0.00610516	7.90398e-20	0.152102	protein_coding	TRUE	SGMS1
chr10	ENSG00000198964	cg22388374	rs10508930	SGMS1	-0.0383631	0.0043422	1.00155e-18	0.0703718	protein_coding	TRUE	SGMS1
chr10	ENSG00000198964	cg11764846	rs10508930	SGMS1	-0.0619956	0.00706659	1.73882e-18	0.204137	protein_coding	TRUE	SGMS1
chr10	ENSG00000198964	cg13382516	rs10508930	SGMS1	-0.0427821	0.00498368	9.12885e-18	0.224517	protein_coding	TRUE	SGMS1
chr10	ENSG00000198964	cg15678767	rs10508930	SGMS1	-0.0507086	0.00609995	9.33537e-17	0.324342	protein_coding	TRUE	SGMS1
chr10	ENSG00000198964	cg08363235	rs10508930	SGMS1	-0.0523193	0.00646399	5.77577e-16	0.278436	protein_coding	TRUE	SGMS1
chr10	ENSG00000198964	cg24037270	rs10508930	SGMS1	-0.045444	0.00602828	4.75506e-14	0.171555	protein_coding	TRUE	SGMS1
chr10	ENSG00000198964	cg20014988	rs10508930	SGMS1	-0.0308285	0.00423181	3.21807e-13	0.302432	protein_coding	TRUE	SGMS1
chr10	ENSG00000198964	cg00168459	rs10508930	SGMS1	-0.0324091	0.00476716	1.05777e-11	0.31714	protein_coding	TRUE	SGMS1
chr10	ENSG00000198964	cg00453368	rs10508930	SGMS1	-0.0298116	0.00452214	4.32898e-11	0.175753	protein_coding	TRUE	SGMS1
chr10	ENSG00000198964	cg10188795	rs10508930	SGMS1	-0.0362128	0.00565153	1.47813e-10	0.319488	protein_coding	TRUE	SGMS1
chr10	ENSG00000198964	cg17673495	rs10508930	SGMS1	-0.02097	0.00329029	1.84997e-10	0.852327	protein_coding	TRUE	SGMS1
chr10	ENSG00000198964	cg00936935	rs10508930	SGMS1	-0.0259636	0.00407952	1.96081e-10	0.0640385	protein_coding	TRUE	SGMS1
chr10	ENSG00000198964	cg05102856	rs10508930	SGMS1	-0.0268535	0.00456583	4.06798e-09	0.36675	protein_coding	TRUE	SGMS1
chr10	ENSG00000198964	cg08557120	rs10508930	SGMS1	-0.022561	0.00430791	1.63102e-07	0.205865	protein_coding	TRUE	SGMS1
chr10	ENSG00000226200	cg02249577	rs56138205	SGMS1-AS1	-0.591911	0.116195	3.50355e-07	0.0920323	lncRNA	TRUE	SGMS1-AS1
chr10	ENSG00000187783	cg12303521	rs7074794	TMEM72	-0.657946	0.127764	2.60925e-07	0.42425	protein_coding	TRUE	TMEM72
chr10	ENSG00000187783	cg05187965	rs7074794	TMEM72	-0.990222	0.200844	8.21046e-07	0.432748	protein_coding	TRUE	TMEM72
chr10	ENSG00000224812	cg26040874	rs10900143	TMEM72-AS1	-0.48373	0.0824004	4.34539e-09	0.114695	lncRNA	TRUE	TMEM72-AS1
chr10	ENSG00000172661	cg14716689	rs10793625	WASHC2C	0.0697235	0.0104226	2.23716e-11	0.248268	protein_coding	TRUE	FAM21C
chr10	ENSG00000172661	cg27462740	rs10793625	WASHC2C	0.034526	0.00525797	5.15435e-11	0.470578	protein_coding	TRUE	FAM21C
chr10	ENSG00000172661	cg01325993	rs10793625	WASHC2C	0.0354483	0.00590948	1.99094e-09	0.265668	protein_coding	TRUE	FAM21C
chr10	ENSG00000172661	cg07111274	rs10793625	WASHC2C	0.0300115	0.00530803	1.56777e-08	0.455472	protein_coding	TRUE	FAM21C
chr10	ENSG00000227165	cg24120153	rs10886785	WDR11-AS1	-1.09768	0.150637	3.17117e-13	0.413431	lncRNA	TRUE	WDR11-AS1
chr10	ENSG00000227165	cg13596132	rs10886785	WDR11-AS1	-0.672261	0.102761	6.06977e-11	0.591213	lncRNA	TRUE	WDR11-AS1
chr10	ENSG00000227165	cg00600684	rs10886785	WDR11-AS1	-0.531956	0.105899	5.08061e-07	0.474835	lncRNA	TRUE	WDR11-AS1
chr11	ENSG00000110455	cg00452199	rs2074038	ACCS	-0.209824	0.0161438	1.26962e-38	0.650223	protein_coding	TRUE	ACCS
chr11	ENSG00000110455	cg20240860	rs2074038	ACCS	-0.166599	0.0131514	8.92496e-37	0.489945	protein_coding	TRUE	ACCS
chr11	ENSG00000110455	cg09339476	rs2074038	ACCS	-0.176115	0.0144805	4.93792e-34	0.915525	protein_coding	TRUE	ACCS
chr11	ENSG00000110455	cg04074835	rs2074038	ACCS	-0.119515	0.011001	1.71093e-27	0.463456	protein_coding	TRUE	ACCS
chr11	ENSG00000110455	cg18265608	rs2074038	ACCS	-0.124853	0.0124512	1.1548e-23	0.910132	protein_coding	TRUE	ACCS
chr11	ENSG00000110455	cg16963683	rs2074038	ACCS	-0.136758	0.0138376	4.93152e-23	0.398913	protein_coding	TRUE	ACCS
chr11	ENSG00000110455	cg15894661	rs2074038	ACCS	-0.102604	0.010514	1.69087e-22	0.700578	protein_coding	TRUE	ACCS
chr11	ENSG00000110455	cg12867237	rs2074038	ACCS	-0.160821	0.0170321	3.64938e-21	0.344352	protein_coding	TRUE	ACCS
chr11	ENSG00000110455	cg11200965	rs2074038	ACCS	-0.123538	0.0139666	9.13024e-19	0.134923	protein_coding	TRUE	ACCS
chr11	ENSG00000110455	cg12287025	rs2074038	ACCS	-0.130085	0.0154751	4.23746e-17	0.153234	protein_coding	TRUE	ACCS
chr11	ENSG00000110455	cg16512570	rs2074038	ACCS	-0.101558	0.0120953	4.59897e-17	0.338604	protein_coding	TRUE	ACCS
chr11	ENSG00000110455	cg08632680	rs2074038	ACCS	-0.126585	0.0187858	1.60234e-11	0.156516	protein_coding	TRUE	ACCS
chr11	ENSG00000110455	cg10598066	rs2074038	ACCS	-0.144049	0.0220798	6.84653e-11	0.250348	protein_coding	TRUE	ACCS
chr11	ENSG00000133805	cg07329251	rs11042812	AMPD3	-0.0390121	0.00613077	1.97422e-10	0.596851	protein_coding	TRUE	AMPD3
chr11	ENSG00000133805	cg26489413	rs11042812	AMPD3	-0.0334212	0.00607949	3.85512e-08	0.13525	protein_coding	TRUE	AMPD3
chr11	ENSG00000133805	cg12560076	rs11042812	AMPD3	-0.0355911	0.00655101	5.54403e-08	0.122696	protein_coding	TRUE	AMPD3
chr11	ENSG00000280367	cg05067963	rs3824897	AP002364.1	-0.852985	0.0895777	1.69415e-21	0.930645	TEC	TRUE	RP11-121L10.2
chr11	ENSG00000280367	cg26834418	rs3824897	AP002364.1	-0.863352	0.0907165	1.78188e-21	0.963061	TEC	TRUE	RP11-121L10.2
chr11	ENSG00000280367	cg22332266	rs3824897	AP002364.1	-0.880448	0.0951892	2.25648e-20	0.925698	TEC	TRUE	RP11-121L10.2
chr11	ENSG00000280367	cg26138821	rs3824897	AP002364.1	-0.638563	0.0710955	2.66451e-19	0.99515	TEC	TRUE	RP11-121L10.2
chr11	ENSG00000280367	cg04351018	rs3824897	AP002364.1	-0.488915	0.0596197	2.39279e-16	0.981562	TEC	TRUE	RP11-121L10.2
chr11	ENSG00000280367	cg26028595	rs3824897	AP002364.1	-0.271603	0.0343581	2.67775e-15	0.985039	TEC	TRUE	RP11-121L10.2
chr11	ENSG00000149089	cg25948180	rs16926448	APIP	-0.0382252	0.00698251	4.38946e-08	0.385939	protein_coding	TRUE	APIP
chr11	ENSG00000149089	cg22717608	rs16926448	APIP	-0.0607364	0.0113887	9.65812e-08	0.51706	protein_coding	TRUE	APIP
chr11	ENSG00000149089	cg02333667	rs16926448	APIP	-0.0317759	0.00641131	7.18724e-07	0.466465	protein_coding	TRUE	APIP
chr11	ENSG00000149089	cg09194750	rs16926448	APIP	-0.0197055	0.00401231	9.04928e-07	0.978459	protein_coding	TRUE	APIP
chr11	ENSG00000167995	cg20584555	rs972355	BEST1	-0.102634	0.00951155	3.82075e-27	0.673119	protein_coding	TRUE	BEST1
chr11	ENSG00000167995	cg11562596	rs972355	BEST1	-0.121024	0.0113095	1.00588e-26	0.520817	protein_coding	TRUE	BEST1
chr11	ENSG00000167995	cg05481452	rs972355	BEST1	-0.0959098	0.0093202	7.77445e-25	0.624247	protein_coding	TRUE	BEST1
chr11	ENSG00000167995	cg06068935	rs972355	BEST1	-0.0803521	0.0082047	1.20165e-22	0.342823	protein_coding	TRUE	BEST1
chr11	ENSG00000167995	cg15456821	rs972355	BEST1	-0.0494438	0.00598607	1.45899e-16	0.487059	protein_coding	TRUE	BEST1
chr11	ENSG00000167995	cg23584647	rs972355	BEST1	-0.0248761	0.00328589	3.71563e-14	0.532145	protein_coding	TRUE	BEST1
chr11	ENSG00000167995	cg24944820	rs972355	BEST1	0.0140578	0.00267386	1.46033e-07	0.429469	protein_coding	TRUE	BEST1
chr11	ENSG00000167995	cg22892043	rs972355	BEST1	-0.0229779	0.00457228	5.02207e-07	0.718476	protein_coding	TRUE	BEST1
chr11	ENSG00000177697	cg01743873	rs142707435	CD151	-0.14416	0.0180611	1.44256e-15	0.676419	protein_coding	TRUE	CD151
chr11	ENSG00000177697	cg22596326	rs142707435	CD151	-0.203385	0.0317792	1.55442e-10	0.07401	protein_coding	TRUE	CD151
chr11	ENSG00000177697	cg02798112	rs142707435	CD151	-0.0635198	0.0108085	4.18237e-09	0.341923	protein_coding	TRUE	CD151
chr11	ENSG00000177697	cg03885332	rs142707435	CD151	-0.0656603	0.0118944	3.38457e-08	0.977773	protein_coding	TRUE	CD151
chr11	ENSG00000177697	cg24508095	rs142707435	CD151	-0.0420731	0.00787617	9.20158e-08	0.556271	protein_coding	TRUE	CD151
chr11	ENSG00000177697	cg26621248	rs142707435	CD151	-0.0585141	0.0110222	1.10394e-07	0.756641	protein_coding	TRUE	CD151
chr11	ENSG00000023171	cg09612920	rs2846310	GRAMD1B	-0.00520539	0.00100121	2.00275e-07	0.921182	protein_coding	TRUE	GRAMD1B
chr11	ENSG00000023171	cg12728690	rs2846310	GRAMD1B	-0.00781366	0.0015287	3.19935e-07	0.766475	protein_coding	TRUE	GRAMD1B
chr11	ENSG00000023171	cg24961445	rs17127435	GRAMD1B	-0.00692937	0.00137253	4.45023e-07	0.262301	protein_coding	TRUE	GRAMD1B
chr11	ENSG00000023171	cg13709043	rs17127435	GRAMD1B	-0.0114652	0.00231881	7.63653e-07	0.149564	protein_coding	TRUE	GRAMD1B
chr11	ENSG00000166796	cg07398106	rs11605386	LDHC	-1.06769	0.0727296	8.62556e-49	0.509808	protein_coding	TRUE	LDHC
chr11	ENSG00000166796	cg11821245	rs11605386	LDHC	-0.882909	0.068202	2.49113e-38	0.325273	protein_coding	TRUE	LDHC
chr11	ENSG00000166796	cg07415359	rs11605386	LDHC	-0.584128	0.0482186	8.88484e-34	0.14086	protein_coding	TRUE	LDHC
chr11	ENSG00000166796	cg21471707	rs11605386	LDHC	-0.640967	0.0586955	9.22936e-28	0.883734	protein_coding	TRUE	LDHC
chr11	ENSG00000166796	cg14259717	rs11605386	LDHC	-0.634438	0.0596096	1.87554e-26	0.527708	protein_coding	TRUE	LDHC
chr11	ENSG00000166796	cg08418111	rs11605386	LDHC	-0.485641	0.0476463	2.13886e-24	0.878691	protein_coding	TRUE	LDHC
chr11	ENSG00000166796	cg14332815	rs11605386	LDHC	-0.516279	0.0519632	2.91772e-23	0.837499	protein_coding	TRUE	LDHC
chr11	ENSG00000166796	cg19767548	rs11605386	LDHC	-0.48948	0.0622566	3.77163e-15	0.694929	protein_coding	TRUE	LDHC
chr11	ENSG00000166796	cg02232751	rs11605386	LDHC	-0.263906	0.0378506	3.11789e-12	0.978604	protein_coding	TRUE	LDHC
chr11	ENSG00000166796	cg06888460	rs11605386	LDHC	-0.259845	0.04065	1.63453e-10	0.265483	protein_coding	TRUE	LDHC
chr11	ENSG00000166796	cg01489981	rs11605386	LDHC	-0.165206	0.0276626	2.34144e-09	0.118726	protein_coding	TRUE	LDHC
chr11	ENSG00000166796	cg26740318	rs11605386	LDHC	-0.309784	0.0622646	6.51496e-07	0.191622	protein_coding	TRUE	LDHC
chr11	ENSG00000148948	cg03818576	rs998447	LRRC4C	-0.0402095	0.00532119	4.14154e-14	0.291717	protein_coding	TRUE	LRRC4C
chr11	ENSG00000148948	cg26553513	rs998447	LRRC4C	-0.033792	0.00537338	3.19967e-10	0.0690928	protein_coding	TRUE	LRRC4C
chr11	ENSG00000110514	cg23350132	rs10501320	MADD	-0.0101815	0.00177921	1.05005e-08	0.615864	protein_coding	TRUE	MADD
chr11	ENSG00000110514	cg22070650	rs10501320	MADD	-0.0118505	0.00210463	1.79514e-08	0.223299	protein_coding	TRUE	MADD
chr11	ENSG00000110514	cg27221977	rs10501320	MADD	-0.00863619	0.00169089	3.26507e-07	0.583895	protein_coding	TRUE	MADD
chr11	ENSG00000151376	cg12030550	rs61703751	ME3	-0.0686688	0.0124452	3.43476e-08	0.560504	protein_coding	TRUE	ME3
chr11	ENSG00000151376	cg03955932	rs61703751	ME3	-0.0793909	0.0158167	5.18266e-07	0.282309	protein_coding	TRUE	ME3
chr11	ENSG00000151376	cg09416908	rs61703751	ME3	-0.0602569	0.012248	8.6656e-07	0.154218	protein_coding	TRUE	ME3
chr11	ENSG00000197345	cg11245990	rs111612765	MRPL21	-0.16851	0.0135107	1.05659e-35	0.944002	protein_coding	TRUE	MRPL21
chr11	ENSG00000197345	cg18350739	rs111612765	MRPL21	0.128136	0.0109328	1.00373e-31	0.931292	protein_coding	TRUE	MRPL21
chr11	ENSG00000197345	cg07511668	rs111612765	MRPL21	-0.170562	0.0145903	1.43301e-31	0.934196	protein_coding	TRUE	MRPL21
chr11	ENSG00000197345	cg04772025	rs111612765	MRPL21	-0.106495	0.0105202	4.37015e-24	0.0706432	protein_coding	TRUE	MRPL21
chr11	ENSG00000197345	cg21862992	rs111612765	MRPL21	-0.0882319	0.0100233	1.33629e-18	0.77525	protein_coding	TRUE	MRPL21
chr11	ENSG00000197345	cg10879867	rs111612765	MRPL21	-0.0834827	0.00974054	1.02908e-17	0.838622	protein_coding	TRUE	MRPL21
chr11	ENSG00000197345	cg08757828	rs111612765	MRPL21	-0.0883963	0.0115138	1.62296e-14	0.0547716	protein_coding	TRUE	MRPL21
chr11	ENSG00000197345	cg07716408	rs111612765	MRPL21	0.0949441	0.0124743	2.71582e-14	0.907946	protein_coding	TRUE	MRPL21
chr11	ENSG00000197345	cg08967684	rs111612765	MRPL21	0.0531707	0.00743166	8.3906e-13	0.539259	protein_coding	TRUE	MRPL21
chr11	ENSG00000197345	cg01988459	rs111612765	MRPL21	0.0550219	0.00781559	1.92222e-12	0.544269	protein_coding	TRUE	MRPL21
chr11	ENSG00000197345	cg02939879	rs111612765	MRPL21	0.0337443	0.00656795	2.78089e-07	0.385979	protein_coding	TRUE	MRPL21
chr11	ENSG00000197345	cg00242965	rs111612765	MRPL21	-0.0530792	0.0106395	6.07302e-07	0.777219	protein_coding	TRUE	MRPL21
chr11	ENSG00000149480	cg10449041	rs11231155	MTA2	-0.0276799	0.00466658	3.00128e-09	0.0677249	protein_coding	TRUE	MTA2
chr11	ENSG00000134627	cg04757806	rs76114211	PIWIL4	-0.245834	0.0481559	3.3088e-07	0.349645	protein_coding	TRUE	PIWIL4
chr11	ENSG00000110080	cg12017702	rs2230278	ST3GAL4	-0.159592	0.0258513	6.68092e-10	0.96423	protein_coding	TRUE	ST3GAL4
chr11	ENSG00000110080	cg20037145	rs2230278	ST3GAL4	-0.0970327	0.0189004	2.83801e-07	0.502514	protein_coding	TRUE	ST3GAL4
chr11	ENSG00000198168	cg01129966	rs2286811	SVIP	0.0678242	0.0136439	6.65968e-07	0.371306	protein_coding	TRUE	SVIP
chr11	ENSG00000175567	cg25592907	rs632862	UCP2	-0.294166	0.0562367	1.68734e-07	0.624252	protein_coding	TRUE	UCP2
chr11	ENSG00000167987	cg23043946	rs519296	VPS37C	-0.0405772	0.00413713	1.03941e-22	0.0933595	protein_coding	TRUE	VPS37C
chr11	ENSG00000167987	cg02920403	rs519296	VPS37C	-0.064854	0.00672268	5.05908e-22	0.458297	protein_coding	TRUE	VPS37C
chr11	ENSG00000167987	cg26241240	rs519296	VPS37C	-0.0211172	0.00240078	1.4181e-18	0.39838	protein_coding	TRUE	VPS37C
chr11	ENSG00000167987	cg09664380	rs519296	VPS37C	-0.0165166	0.00208462	2.3167e-15	0.0749271	protein_coding	TRUE	VPS37C
chr11	ENSG00000167987	cg21871670	rs519296	VPS37C	0.00696191	0.00139883	6.45968e-07	0.312669	protein_coding	TRUE	VPS37C
chr12	ENSG00000253719	cg04906455	rs3832833	ATXN7L3B	-0.0053519	0.000870343	7.78811e-10	0.3188	protein_coding	TRUE	ATXN7L3B
chr12	ENSG00000120647	cg15496531	rs10774154	CCDC77	-1.0736	0.204146	1.44843e-07	0.884241	protein_coding	TRUE	CCDC77
chr12	ENSG00000136026	cg13163660	rs61942136	CKAP4	-0.0439399	0.00616949	1.06264e-12	0.832227	protein_coding	TRUE	CKAP4
chr12	ENSG00000136026	cg13249833	rs61942136	CKAP4	-0.0487186	0.00743406	5.62327e-11	0.999439	protein_coding	TRUE	CKAP4
chr12	ENSG00000136026	cg09239756	rs61942136	CKAP4	-0.0308164	0.00587469	1.5575e-07	0.449424	protein_coding	TRUE	CKAP4
chr12	ENSG00000111364	cg07670188	rs74996347	DDX55	0.0688157	0.0116424	3.40452e-09	0.07472	protein_coding	TRUE	DDX55
chr12	ENSG00000111364	cg22007326	rs74996347	DDX55	-0.0270538	0.00544659	6.79553e-07	0.275625	protein_coding	TRUE	DDX55
chr12	ENSG00000010219	cg16064691	rs10492055	DYRK4	-0.122132	0.0248738	9.1055e-07	0.995345	protein_coding	TRUE	DYRK4
chr12	ENSG00000134285	cg07373432	rs2293449	FKBP11	0.146257	0.0205898	1.21769e-12	0.144622	protein_coding	TRUE	FKBP11
chr12	ENSG00000134285	cg11208719	rs2293449	FKBP11	-0.152863	0.0221081	4.70059e-12	0.0554447	protein_coding	TRUE	FKBP11
chr12	ENSG00000134285	cg13212803	rs2293449	FKBP11	0.0725928	0.0137648	1.33622e-07	0.108835	protein_coding	TRUE	FKBP11
chr12	ENSG00000134285	cg08958015	rs2293449	FKBP11	-0.08281	0.0158787	1.83665e-07	0.282679	protein_coding	TRUE	FKBP11
chr12	ENSG00000123104	cg07645296	rs11048706	ITPR2	-0.0168592	0.00274687	8.37744e-10	0.457824	protein_coding	TRUE	ITPR2
chr12	ENSG00000123104	cg20787196	rs11048706	ITPR2	-0.0192095	0.00324956	3.39218e-09	0.775547	protein_coding	TRUE	ITPR2
chr12	ENSG00000010626	cg01097940	rs12831467	LRRC23	0.0240138	0.00248678	4.61044e-22	0.392707	protein_coding	TRUE	LRRC23
chr12	ENSG00000010626	cg26269324	rs12831467	LRRC23	0.022597	0.00248049	8.24656e-20	0.0784404	protein_coding	TRUE	LRRC23
chr12	ENSG00000010626	cg25162631	rs12831467	LRRC23	-0.0389608	0.00443695	1.62034e-18	0.431993	protein_coding	TRUE	LRRC23
chr12	ENSG00000010626	cg15411984	rs12831467	LRRC23	0.0655315	0.00807174	4.7145e-16	0.436777	protein_coding	TRUE	LRRC23
chr12	ENSG00000010626	cg17476499	rs12831467	LRRC23	0.0622167	0.0078355	2.01602e-15	0.410235	protein_coding	TRUE	LRRC23
chr12	ENSG00000010626	cg26229977	rs12831467	LRRC23	0.0402199	0.00625382	1.26556e-10	0.595939	protein_coding	TRUE	LRRC23
chr12	ENSG00000010626	cg08099141	rs12831467	LRRC23	0.0191917	0.00321042	2.25998e-09	0.720688	protein_coding	TRUE	LRRC23
chr12	ENSG00000010626	cg14593550	rs12831467	LRRC23	0.0302985	0.0051938	5.42466e-09	0.620521	protein_coding	TRUE	LRRC23
chr12	ENSG00000010626	cg23412654	rs12831467	LRRC23	-0.0201674	0.00356886	1.59577e-08	0.716336	protein_coding	TRUE	LRRC23
chr12	ENSG00000010626	cg03393638	rs12831467	LRRC23	0.0376354	0.00699262	7.35988e-08	0.416017	protein_coding	TRUE	LRRC23
chr12	ENSG00000010626	cg25316512	rs12831467	LRRC23	-0.0160497	0.00317388	4.2636e-07	0.726853	protein_coding	TRUE	LRRC23
chr12	ENSG00000182544	cg27467734	rs148152366	MFSD5	0.0998543	0.0151376	4.21171e-11	0.279693	protein_coding	TRUE	MFSD5
chr12	ENSG00000177406	cg08089041	rs61916675	NINJ2-AS1	-0.170269	0.0283043	1.79154e-09	0.861218	lncRNA	TRUE	RP11-218M22.1
chr12	ENSG00000111696	cg15124019	rs17034648	NT5DC3	-0.0602022	0.0121971	7.98313e-07	0.445515	protein_coding	TRUE	NT5DC3
chr12	ENSG00000171759	cg27569040	rs11442766	PAH	-0.238422	0.0483832	8.31677e-07	0.344275	protein_coding	TRUE	PAH
chr12	ENSG00000174718	cg17560472	rs12370315	RESF1	0.374655	0.0618282	1.3645e-09	0.18231	protein_coding	TRUE	KIAA1551
chr12	ENSG00000139725	cg26392922	rs1168663	RHOF	-0.486403	0.0793139	8.64343e-10	0.903965	protein_coding	TRUE	RHOF
chr12	ENSG00000123297	cg04478727	rs6581155	TSFM	-0.110145	0.0184316	2.28882e-09	0.91591	protein_coding	TRUE	TSFM
chr12	ENSG00000127337	cg11871910	rs7136238	YEATS4	-0.221176	0.0298794	1.33834e-13	0.0613996	protein_coding	TRUE	YEATS4
chr13	ENSG00000120675	cg15988970	rs17553284	DNAJC15	-0.234963	0.0173301	7.09414e-42	0.944833	protein_coding	TRUE	DNAJC15
chr13	ENSG00000120675	cg14729962	rs17553284	DNAJC15	-0.153116	0.0114242	5.81758e-41	0.929127	protein_coding	TRUE	DNAJC15
chr13	ENSG00000120675	cg09677945	rs17553284	DNAJC15	-0.187997	0.0142498	9.6339e-40	0.935473	protein_coding	TRUE	DNAJC15
chr13	ENSG00000120675	cg12504148	rs17553284	DNAJC15	-0.0773098	0.00624544	3.41259e-35	0.215377	protein_coding	TRUE	DNAJC15
chr13	ENSG00000120675	cg05035143	rs17553284	DNAJC15	-0.0799435	0.00705976	1.0001e-29	0.0587587	protein_coding	TRUE	DNAJC15
chr13	ENSG00000120675	cg12201399	rs17553284	DNAJC15	-0.0531435	0.00491999	3.38409e-27	0.669476	protein_coding	TRUE	DNAJC15
chr13	ENSG00000123179	cg20399252	rs3809325	EBPL	-0.293379	0.0576887	3.66558e-07	0.569727	protein_coding	TRUE	EBPL
chr13	ENSG00000172915	cg08520986	rs9574068	NBEA	-0.0195926	0.0038911	4.77275e-07	0.380037	protein_coding	TRUE	NBEA
chr13	ENSG00000139508	cg24321030	rs66964313	SLC46A3	0.0190535	0.00367343	2.13881e-07	0.219318	protein_coding	TRUE	SLC46A3
chr14	ENSG00000119673	cg26251192	rs11626972	ACOT2	0.467764	0.0833441	1.99494e-08	0.460258	protein_coding	TRUE	ACOT2
chr14	ENSG00000245466	cg01928351	rs1572678	AL357153.1	-0.540833	0.098081	3.50481e-08	0.863017	lncRNA	TRUE	CTD-2540L5.6
chr14	ENSG00000139899	cg13105904	rs10143703	CBLN3	-1.31112	0.256882	3.32609e-07	0.988551	protein_coding	TRUE	CBLN3
chr14	ENSG00000100526	cg24032252	rs1884014	CDKN3	-0.635796	0.0764214	8.82577e-17	0.195577	protein_coding	TRUE	CDKN3
chr14	ENSG00000100526	cg13955065	rs1884014	CDKN3	-0.588405	0.079953	1.84762e-13	0.199	protein_coding	TRUE	CDKN3
chr14	ENSG00000100884	cg00524400	rs62000824	CPNE6	0.17179	0.0330409	2.0002e-07	0.176217	protein_coding	TRUE	CPNE6
chr14	ENSG00000100884	cg23112188	rs62000824	CPNE6	0.151279	0.0301421	5.19793e-07	0.244156	protein_coding	TRUE	CPNE6
chr14	ENSG00000100884	cg22775413	rs62000824	CPNE6	0.123259	0.0246781	5.89311e-07	0.2072	protein_coding	TRUE	CPNE6
chr14	ENSG00000066629	cg26180015	rs11625037	EML1	-0.0564643	0.00986274	1.03424e-08	0.620228	protein_coding	TRUE	EML1
chr14	ENSG00000066629	cg08669673	rs11625037	EML1	-0.0457343	0.0084766	6.83871e-08	0.653147	protein_coding	TRUE	EML1
chr14	ENSG00000066629	cg01811583	rs11625037	EML1	-0.029895	0.005677	1.39432e-07	0.653135	protein_coding	TRUE	EML1
chr14	ENSG00000066629	cg13725826	rs11625037	EML1	-0.0460678	0.00899962	3.07379e-07	0.429083	protein_coding	TRUE	EML1
chr14	ENSG00000100577	cg02181287	rs8008449	GSTZ1	-0.128309	0.0241613	1.09318e-07	0.569938	protein_coding	TRUE	GSTZ1
chr14	ENSG00000100564	cg16576052	rs4902498	PIGH	-0.046567	0.00892268	1.7994e-07	0.34425	protein_coding	TRUE	PIGH
chr14	ENSG00000165502	cg19777190	rs1952013	RPL36AL	0.0665141	0.00709748	7.15082e-21	0.178326	protein_coding	TRUE	RPL36AL
chr14	ENSG00000151748	cg26349299	rs12433935	SAV1	-0.0594568	0.0110042	6.54924e-08	0.94763	protein_coding	TRUE	SAV1
chr14	ENSG00000188488	cg11257864	rs8005135	SERPINA5	-0.0399348	0.00773338	2.41783e-07	0.907211	protein_coding	TRUE	SERPINA5
chr14	ENSG00000188488	cg07862738	rs8005135	SERPINA5	-0.0205193	0.00410917	5.92837e-07	0.626209	protein_coding	TRUE	SERPINA5
chr14	ENSG00000151812	cg18444006	rs1983737	SLC35F4	-0.558891	0.112256	6.4013e-07	0.229115	protein_coding	TRUE	SLC35F4
chr14	ENSG00000042088	cg02190211	rs942190	TDP1	-0.111378	0.0207334	7.79024e-08	0.387025	protein_coding	TRUE	TDP1
chr14	ENSG00000042088	cg22836787	rs942190	TDP1	-0.090232	0.0172816	1.77689e-07	0.695858	protein_coding	TRUE	TDP1
chr14	ENSG00000133985	cg01928351	rs34906255	TTC9	-0.184705	0.0332868	2.87491e-08	0.462766	protein_coding	TRUE	TTC9
chr14	ENSG00000100568	cg07922154	rs3215578	VTI1B	-0.0709562	0.0135301	1.56864e-07	0.139754	protein_coding	TRUE	VTI1B
chr14	ENSG00000100568	cg20211272	rs3215578	VTI1B	-0.159178	0.0312438	3.49291e-07	0.580069	protein_coding	TRUE	VTI1B
chr15	ENSG00000259221	cg25411488	rs1025143	AC023905.1	0.0168565	0.00270266	4.46082e-10	0.233935	lncRNA	TRUE	CTD-2050N2.1
chr15	ENSG00000259221	cg19460792	rs1025143	AC023905.1	-0.0100593	0.00181235	2.85004e-08	0.411485	lncRNA	TRUE	CTD-2050N2.1
chr15	ENSG00000140450	cg18010014	rs8026910	ARRDC4	-0.196203	0.0224567	2.39456e-18	0.475064	protein_coding	TRUE	ARRDC4
chr15	ENSG00000080644	cg04214706	rs8040868	CHRNA3	0.00830237	0.00117241	1.42675e-12	0.137948	protein_coding	TRUE	CHRNA3
chr15	ENSG00000080644	cg21642963	rs8040868	CHRNA3	-0.00721161	0.00108454	2.94166e-11	0.0818224	protein_coding	TRUE	CHRNA3
chr15	ENSG00000128463	cg06852058	rs17236763	EMC4	-0.0890166	0.017257	2.49202e-07	0.067232	protein_coding	TRUE	EMC4
chr15	ENSG00000140307	cg18305271	rs10152509	GTF2A2	-0.419905	0.0471343	5.1635e-19	0.245831	protein_coding	TRUE	GTF2A2
chr15	ENSG00000140307	cg19188572	rs10152509	GTF2A2	0.133562	0.0158187	3.08483e-17	0.71737	protein_coding	TRUE	GTF2A2
chr15	ENSG00000140307	cg17563769	rs10152509	GTF2A2	-0.0922057	0.0118334	6.59696e-15	0.430722	protein_coding	TRUE	GTF2A2
chr15	ENSG00000140575	cg17618285	rs4031434	IQGAP1	-0.0129648	0.00235816	3.84412e-08	0.295968	protein_coding	TRUE	IQGAP1
chr15	ENSG00000198794	cg15902774	rs7342591	SCAMP5	-0.0069411	0.0012592	3.54165e-08	0.473176	protein_coding	TRUE	SCAMP5
chr15	ENSG00000248508	cg09159619	rs8041057	SRP14-AS1	0.0845121	0.0162709	2.05758e-07	0.360693	lncRNA	TRUE	SRP14-AS1
chr15	ENSG00000184277	cg12727528	rs675436	TM2D3	0.0291101	0.00278355	1.34828e-25	0.109101	protein_coding	TRUE	TM2D3
chr15	ENSG00000177082	cg10314221	rs2137270	WDR73	-0.06201	0.0112361	3.41289e-08	0.851834	protein_coding	TRUE	WDR73
chr15	ENSG00000177082	cg27379587	rs7169629	WDR73	-0.0728072	0.0132137	3.58858e-08	0.678536	protein_coding	TRUE	WDR73
chr15	ENSG00000177082	cg17866455	rs2137270	WDR73	0.0896373	0.0171747	1.79755e-07	0.327352	protein_coding	TRUE	WDR73
chr15	ENSG00000177082	cg09876464	rs7169629	WDR73	-0.0555278	0.0111866	6.91365e-07	0.495719	protein_coding	TRUE	WDR73
chr16	ENSG00000260922	cg03412045	rs1974890	AC009139.1	-3.24021	0.49243	4.70329e-11	0.254897	lncRNA	TRUE	RP11-538I12.3
chr16	ENSG00000276791	cg07059052	rs2335455	AC092117.1	-0.0329451	0.00624568	1.32851e-07	0.983773	lncRNA	TRUE	CTD-2270P14.5
chr16	ENSG00000261332	cg06710853	rs1557672	AC116348.2	-1.16019	0.149138	7.29469e-15	0.336993	lncRNA	TRUE	RP11-297C4.1
chr16	ENSG00000214725	cg02575675	rs747973	CDIPTOSP	-0.670791	0.0624802	6.89238e-27	0.760707	transcribed_unitary_pseudogene	TRUE	CDIPT-AS1
chr16	ENSG00000214725	cg01827781	rs747973	CDIPTOSP	-0.445806	0.0424679	8.86999e-26	0.215366	transcribed_unitary_pseudogene	TRUE	CDIPT-AS1
chr16	ENSG00000214725	cg24235633	rs747973	CDIPTOSP	-0.538311	0.0517048	2.20352e-25	0.795674	transcribed_unitary_pseudogene	TRUE	CDIPT-AS1
chr16	ENSG00000214725	cg24474561	rs747973	CDIPTOSP	-0.215065	0.0335978	1.54199e-10	0.202541	transcribed_unitary_pseudogene	TRUE	CDIPT-AS1
chr16	ENSG00000214725	cg22191015	rs747973	CDIPTOSP	-0.148503	0.0257048	7.59372e-09	0.831923	transcribed_unitary_pseudogene	TRUE	CDIPT-AS1
chr16	ENSG00000214725	cg22581518	rs747973	CDIPTOSP	-0.147675	0.0298092	7.26956e-07	0.129331	transcribed_unitary_pseudogene	TRUE	CDIPT-AS1
chr16	ENSG00000214725	cg13552869	rs747973	CDIPTOSP	0.0880209	0.017845	8.11773e-07	0.561129	transcribed_unitary_pseudogene	TRUE	CDIPT-AS1
chr16	ENSG00000140848	cg00664454	rs291053	CPNE2	-0.197744	0.031543	3.6328e-10	0.286366	protein_coding	TRUE	CPNE2
chr16	ENSG00000140848	cg11246649	rs291053	CPNE2	-0.188371	0.0337892	2.47699e-08	0.225984	protein_coding	TRUE	CPNE2
chr16	ENSG00000140995	cg12064134	rs370010270	DEF8	0.205321	0.0394242	1.90889e-07	0.446166	protein_coding	TRUE	DEF8
chr16	ENSG00000223496	cg02727363	rs4985407	EXOSC6	-0.0819871	0.00763941	7.19186e-27	0.761391	protein_coding	TRUE	EXOSC6
chr16	ENSG00000103264	cg26593722	rs8059409	FBXO31	-0.030376	0.00387673	4.67068e-15	0.846821	protein_coding	TRUE	FBXO31
chr16	ENSG00000103264	cg05259094	rs8059409	FBXO31	-0.0477441	0.00652921	2.62429e-13	0.815506	protein_coding	TRUE	FBXO31
chr16	ENSG00000103264	cg04872075	rs8059409	FBXO31	-0.0370699	0.00528151	2.23776e-12	0.433441	protein_coding	TRUE	FBXO31
chr16	ENSG00000103264	cg02626269	rs8059409	FBXO31	-0.0243439	0.00347222	2.36541e-12	0.930476	protein_coding	TRUE	FBXO31
chr16	ENSG00000103264	cg02552868	rs8059409	FBXO31	-0.0316582	0.00483964	6.09283e-11	0.958792	protein_coding	TRUE	FBXO31
chr16	ENSG00000103264	cg06654782	rs8059409	FBXO31	-0.0158092	0.00278063	1.3046e-08	0.793245	protein_coding	TRUE	FBXO31
chr16	ENSG00000087245	cg03860054	rs1816595	MMP2	0.0359175	0.00593854	1.46479e-09	0.677691	protein_coding	TRUE	MMP2
chr16	ENSG00000087245	cg00249264	rs1816595	MMP2	-0.0297902	0.00508043	4.52639e-09	0.507513	protein_coding	TRUE	MMP2
chr16	ENSG00000087245	cg21979083	rs1816595	MMP2	0.0612391	0.010876	1.7952e-08	0.467229	protein_coding	TRUE	MMP2
chr16	ENSG00000087245	cg14112935	rs1816595	MMP2	0.0297133	0.00549652	6.45093e-08	0.448525	protein_coding	TRUE	MMP2
chr16	ENSG00000087245	cg09350341	rs1816595	MMP2	0.0348429	0.0066545	1.64103e-07	0.605028	protein_coding	TRUE	MMP2
chr16	ENSG00000087245	cg04049508	rs1816595	MMP2	-0.0326241	0.00624715	1.76769e-07	0.794621	protein_coding	TRUE	MMP2
chr16	ENSG00000087245	cg12317456	rs1816595	MMP2	0.0398355	0.00804949	7.46659e-07	0.430105	protein_coding	TRUE	MMP2
chr16	ENSG00000087245	cg07668693	rs1816595	MMP2	0.0267047	0.00540764	7.87977e-07	0.768695	protein_coding	TRUE	MMP2
chr16	ENSG00000169715	cg05743734	rs1610215	MT1E	-0.197905	0.034674	1.14582e-08	0.457	protein_coding	TRUE	MT1E
chr16	ENSG00000169715	cg20083730	rs1610215	MT1E	-0.193278	0.0348139	2.82843e-08	0.93226	protein_coding	TRUE	MT1E
chr16	ENSG00000169715	cg04793813	rs1610215	MT1E	-0.16335	0.0295151	3.12195e-08	0.972295	protein_coding	TRUE	MT1E
chr16	ENSG00000169715	cg02512505	rs1610215	MT1E	-0.28006	0.0530518	1.29901e-07	0.712151	protein_coding	TRUE	MT1E
chr16	ENSG00000169715	cg06463589	rs1610215	MT1E	-0.132731	0.0267841	7.21134e-07	0.594128	protein_coding	TRUE	MT1E
chr16	ENSG00000169715	cg00519002	rs1610215	MT1E	-0.210572	0.0427269	8.29335e-07	0.828852	protein_coding	TRUE	MT1E
chr16	ENSG00000234719	cg16495772	rs393329	NPIPB2	-0.166495	0.0149642	9.35681e-29	0.273358	protein_coding	TRUE	RP11-166B2.1
chr16	ENSG00000234719	cg03082108	rs393329	NPIPB2	-0.0478907	0.00617039	8.40091e-15	0.610912	protein_coding	TRUE	RP11-166B2.1
chr16	ENSG00000204991	cg04287289	rs7204250	SPIRE2	0.948971	0.18461	2.74153e-07	0.651599	protein_coding	TRUE	SPIRE2
chr16	ENSG00000149922	cg11513352	rs3809627	TBX6	1.64759	0.303612	5.74298e-08	0.448737	protein_coding	TRUE	TBX6
chr16	ENSG00000149922	cg03041989	rs3809627	TBX6	0.863894	0.174059	6.93353e-07	0.364034	protein_coding	TRUE	TBX6
chr16	ENSG00000127578	cg14562783	rs4984905	WFIKKN1	-1.2276	0.220794	2.69852e-08	0.162886	protein_coding	TRUE	WFIKKN1
chr16	ENSG00000184939	cg15466818	rs1182967	ZFP90	0.0724763	0.0132043	4.04631e-08	0.138634	protein_coding	TRUE	ZFP90
chr16	ENSG00000184939	cg00748373	rs1182967	ZFP90	0.184136	0.0355598	2.24036e-07	0.30748	protein_coding	TRUE	ZFP90
chr16	ENSG00000184939	cg01142596	rs1182967	ZFP90	0.0614506	0.0121928	4.65784e-07	0.250893	protein_coding	TRUE	ZFP90
chr17	ENSG00000168792	cg03461967	rs200199476	ABHD15	-0.302977	0.0407631	1.06462e-13	0.907674	protein_coding	TRUE	ABHD15
chr17	ENSG00000267665	cg06263341	rs36085797	AC021683.3	-0.053529	0.00900297	2.75274e-09	0.304298	lncRNA	TRUE	RP11-13K12.2
chr17	ENSG00000267665	cg19974715	rs36085797	AC021683.3	-0.0776786	0.0136635	1.30729e-08	0.91935	lncRNA	TRUE	RP11-13K12.2
chr17	ENSG00000262877	cg10914865	rs67602958	AC110285.2	-0.0320836	0.00648595	7.55114e-07	0.60614	lncRNA	TRUE	RP11-1055B8.4
chr17	ENSG00000159199	cg09220756	rs1962412	ATP5MC1	0.0451958	0.00898327	4.87658e-07	0.0762515	protein_coding	TRUE	ATP5G1
chr17	ENSG00000256806	cg15737409	rs7226265	C17orf100	0.247307	0.0403484	8.82799e-10	0.0768541	protein_coding	TRUE	C17orf100
chr17	ENSG00000141219	cg12432006	rs966939	C17orf80	0.0747196	0.00685554	1.16321e-27	0.480093	protein_coding	TRUE	C17orf80
chr17	ENSG00000141219	cg26576875	rs966939	C17orf80	0.11164	0.0116776	1.17575e-21	0.533871	protein_coding	TRUE	C17orf80
chr17	ENSG00000141219	cg06563943	rs966939	C17orf80	0.0593831	0.00629535	3.99093e-21	0.383625	protein_coding	TRUE	C17orf80
chr17	ENSG00000141219	cg01818128	rs966939	C17orf80	0.0462322	0.00493234	7.03076e-21	0.168534	protein_coding	TRUE	C17orf80
chr17	ENSG00000141219	cg14148083	rs966939	C17orf80	0.0314938	0.00467534	1.62623e-11	0.0595345	protein_coding	TRUE	C17orf80
chr17	ENSG00000141219	cg24346909	rs966939	C17orf80	-0.0249064	0.00405279	7.97118e-10	0.538281	protein_coding	TRUE	C17orf80
chr17	ENSG00000141219	cg01532051	rs966939	C17orf80	0.0473719	0.00850305	2.53042e-08	0.12992	protein_coding	TRUE	C17orf80
chr17	ENSG00000141219	cg21927395	rs966939	C17orf80	0.0217097	0.004046	8.06236e-08	0.914638	protein_coding	TRUE	C17orf80
chr17	ENSG00000141219	cg25559913	rs966939	C17orf80	0.0215752	0.0041976	2.74908e-07	0.0529998	protein_coding	TRUE	C17orf80
chr17	ENSG00000170037	cg20634733	rs9911390	CNTROB	-0.143758	0.0267626	7.80472e-08	0.667262	protein_coding	TRUE	CNTROB
chr17	ENSG00000172992	cg21472184	rs4793173	DCAKD	-0.093004	0.0110205	3.19461e-17	0.0705818	protein_coding	TRUE	DCAKD
chr17	ENSG00000172992	cg12204149	rs4793173	DCAKD	-0.0585224	0.00955827	9.20026e-10	0.0937097	protein_coding	TRUE	DCAKD
chr17	ENSG00000172992	cg16177647	rs4793173	DCAKD	-0.0359168	0.00722661	6.69252e-07	0.0911667	protein_coding	TRUE	DCAKD
chr17	ENSG00000167280	cg22109370	rs56200816	ENGASE	0.0720224	0.0146517	8.85022e-07	0.393888	protein_coding	TRUE	ENGASE
chr17	ENSG00000007237	cg24524013	rs9897123	GAS7	0.00500125	0.00049146	2.5298e-24	0.0853768	protein_coding	TRUE	GAS7
chr17	ENSG00000007237	cg17353900	rs9897123	GAS7	0.00396412	0.000443559	3.99542e-19	0.303406	protein_coding	TRUE	GAS7
chr17	ENSG00000007237	cg04777140	rs9897123	GAS7	0.00323506	0.0003847	4.12473e-17	0.0845893	protein_coding	TRUE	GAS7
chr17	ENSG00000007237	cg14538231	rs9897123	GAS7	-0.00468789	0.000578191	5.15173e-16	0.639796	protein_coding	TRUE	GAS7
chr17	ENSG00000007237	cg24382698	rs9897123	GAS7	0.00272861	0.000365623	8.46418e-14	0.896044	protein_coding	TRUE	GAS7
chr17	ENSG00000007237	cg04267691	rs9897123	GAS7	0.00262112	0.000367262	9.54414e-13	0.152162	protein_coding	TRUE	GAS7
chr17	ENSG00000007237	cg12697325	rs9897123	GAS7	0.00270114	0.000393254	6.47951e-12	0.264601	protein_coding	TRUE	GAS7
chr17	ENSG00000007237	cg04331406	rs9897123	GAS7	0.00243807	0.000366817	3.00019e-11	0.328873	protein_coding	TRUE	GAS7
chr17	ENSG00000007237	cg26996616	rs9897123	GAS7	0.00242317	0.000366472	3.78761e-11	0.385508	protein_coding	TRUE	GAS7
chr17	ENSG00000007237	cg05112120	rs9897123	GAS7	0.00290725	0.000449892	1.03253e-10	0.26882	protein_coding	TRUE	GAS7
chr17	ENSG00000007237	cg13773741	rs9897123	GAS7	0.00308426	0.000488923	2.82173e-10	0.479827	protein_coding	TRUE	GAS7
chr17	ENSG00000007237	cg12275888	rs9897123	GAS7	0.00198459	0.000320743	6.11441e-10	0.563125	protein_coding	TRUE	GAS7
chr17	ENSG00000007237	cg02605292	rs9897123	GAS7	-0.00320834	0.000555215	7.53489e-09	0.521081	protein_coding	TRUE	GAS7
chr17	ENSG00000007237	cg13291283	rs9897123	GAS7	0.00539077	0.000983955	4.28514e-08	0.253389	protein_coding	TRUE	GAS7
chr17	ENSG00000007237	cg27016544	rs9897123	GAS7	-0.00212451	0.000399549	1.05334e-07	0.869778	protein_coding	TRUE	GAS7
chr17	ENSG00000167861	cg07430967	rs11650024	HID1	0.0877556	0.0134034	5.85999e-11	0.0639822	protein_coding	TRUE	HID1
chr17	ENSG00000070495	cg20832875	rs2240774	JMJD6	-0.0456153	0.00770466	3.20993e-09	0.691549	protein_coding	TRUE	JMJD6
chr17	ENSG00000070495	cg27546012	rs2240774	JMJD6	-0.0169664	0.00332393	3.31998e-07	0.944203	protein_coding	TRUE	JMJD6
chr17	ENSG00000108679	cg00034650	rs3785529	LGALS3BP	-0.0658144	0.0115935	1.37209e-08	0.709978	protein_coding	TRUE	LGALS3BP
chr17	ENSG00000108679	cg12742669	rs3785529	LGALS3BP	-0.0502261	0.0094295	1.00132e-07	0.362907	protein_coding	TRUE	LGALS3BP
chr17	ENSG00000108679	cg14870271	rs3785529	LGALS3BP	-0.0617726	0.0116727	1.20952e-07	0.276477	protein_coding	TRUE	LGALS3BP
chr17	ENSG00000108679	cg11202345	rs3785529	LGALS3BP	-0.0589057	0.011711	4.90606e-07	0.315512	protein_coding	TRUE	LGALS3BP
chr17	ENSG00000109047	cg18630794	rs75438860	RCVRN	0.000619522	0.000103958	2.53246e-09	0.0899108	protein_coding	TRUE	RCVRN
chr17	ENSG00000109047	cg20207911	rs75438860	RCVRN	0.000552892	9.87664e-05	2.16865e-08	0.594399	protein_coding	TRUE	RCVRN
chr17	ENSG00000219200	cg25101124	rs3180517	RNASEK	-0.123657	0.0251659	8.93882e-07	0.306319	protein_coding	TRUE	RNASEK
chr17	ENSG00000267123	cg14627921	rs11077385	SCAT1	0.0350449	0.00515525	1.06159e-11	0.561699	lncRNA	TRUE	CTD-2357A8.3
chr17	ENSG00000267123	cg00144745	rs11077385	SCAT1	0.0498888	0.00794891	3.46979e-10	0.0660699	lncRNA	TRUE	CTD-2357A8.3
chr17	ENSG00000267123	cg19696669	rs11077385	SCAT1	0.0350375	0.00683276	2.93053e-07	0.439308	lncRNA	TRUE	CTD-2357A8.3
chr17	ENSG00000267123	cg24954364	rs11077385	SCAT1	0.0529358	0.0103376	3.04406e-07	0.244595	lncRNA	TRUE	CTD-2357A8.3
chr17	ENSG00000006282	cg15017244	rs9890200	SPATA20	0.128046	0.0172681	1.21453e-13	0.0671321	protein_coding	TRUE	SPATA20
chr17	ENSG00000006282	cg26619156	rs9890200	SPATA20	0.134027	0.018244	2.03691e-13	0.0878398	protein_coding	TRUE	SPATA20
chr17	ENSG00000006282	cg01620849	rs9890200	SPATA20	-0.0586466	0.009668	1.3109e-09	0.673253	protein_coding	TRUE	SPATA20
chr17	ENSG00000006282	cg16068336	rs9890200	SPATA20	-0.0534724	0.0102103	1.63099e-07	0.451279	protein_coding	TRUE	SPATA20
chr17	ENSG00000167720	cg21745320	rs3744270	SRR	-0.0550727	0.0085485	1.17615e-10	0.250242	protein_coding	TRUE	SRR
chr17	ENSG00000167720	cg23720473	rs3744270	SRR	-0.0478891	0.00846313	1.52656e-08	0.886477	protein_coding	TRUE	SRR
chr17	ENSG00000167720	cg27025247	rs3744270	SRR	-0.0320639	0.00615023	1.85366e-07	0.0527031	protein_coding	TRUE	SRR
chr17	ENSG00000070731	cg14243899	rs16967307	ST6GALNAC2	-0.0412498	0.00458528	2.33787e-19	0.121261	protein_coding	TRUE	ST6GALNAC2
chr17	ENSG00000070731	cg24321297	rs16967307	ST6GALNAC2	-0.0191643	0.00233296	2.12883e-16	0.526405	protein_coding	TRUE	ST6GALNAC2
chr17	ENSG00000070731	cg16548154	rs16967307	ST6GALNAC2	-0.0164321	0.00212098	9.37685e-15	0.0602637	protein_coding	TRUE	ST6GALNAC2
chr17	ENSG00000070731	cg13664588	rs16967307	ST6GALNAC2	-0.0113058	0.00177146	1.7457e-10	0.482002	protein_coding	TRUE	ST6GALNAC2
chr17	ENSG00000070731	cg19439071	rs16967307	ST6GALNAC2	-0.0150595	0.00245499	8.55786e-10	0.139324	protein_coding	TRUE	ST6GALNAC2
chr17	ENSG00000070731	cg20503109	rs16967307	ST6GALNAC2	-0.0123705	0.0021786	1.3611e-08	0.15869	protein_coding	TRUE	ST6GALNAC2
chr17	ENSG00000070731	cg16905754	rs16967307	ST6GALNAC2	-0.0114383	0.00229737	6.39613e-07	0.268002	protein_coding	TRUE	ST6GALNAC2
chr18	ENSG00000267127	cg04727522	rs8093433	AC090360.1	0.0672228	0.0125703	8.90562e-08	0.29231	protein_coding	TRUE	RP11-795F19.5
chr18	ENSG00000226742	cg18140558	rs75287701	HSBP1L1	-0.10521	0.018015	5.2166e-09	0.909302	protein_coding	TRUE	HSBP1L1
chr18	ENSG00000226742	cg00363486	rs75287701	HSBP1L1	-0.0947977	0.0174522	5.57695e-08	0.996449	protein_coding	TRUE	HSBP1L1
chr18	ENSG00000226742	cg11687085	rs75287701	HSBP1L1	-0.144585	0.0287186	4.78978e-07	0.674754	protein_coding	TRUE	HSBP1L1
chr18	ENSG00000075643	cg24914219	rs585927	MOCOS	-0.121497	0.0227288	9.01529e-08	0.274653	protein_coding	TRUE	MOCOS
chr18	ENSG00000167306	cg03345145	rs3841750	MYO5B	-0.0672403	0.0136061	7.7357e-07	0.106199	protein_coding	TRUE	MYO5B
chr18	ENSG00000261126	cg18568001	rs9304059	RBFADN	-0.02878	0.00482367	2.42528e-09	0.201858	lncRNA	TRUE	RP11-795F19.1
chr18	ENSG00000130856	cg13375905	rs581504	ZNF236	-0.334927	0.060867	3.74245e-08	0.0694561	protein_coding	TRUE	ZNF236
chr19	ENSG00000160117	cg18888655	rs73509996	ANKLE1	0.492272	0.0995622	7.63925e-07	0.17412	protein_coding	TRUE	ANKLE1
chr19	ENSG00000105186	cg21196646	rs10417773	ANKRD27	-0.0551313	0.0107981	3.29684e-07	0.477303	protein_coding	TRUE	ANKRD27
chr19	ENSG00000105072	cg08065229	rs3745325	C19orf44	-0.378122	0.0566884	2.55466e-11	0.836622	protein_coding	TRUE	C19orf44
chr19	ENSG00000105072	cg19762416	rs3745325	C19orf44	-0.260511	0.040923	1.9418e-10	0.618539	protein_coding	TRUE	C19orf44
chr19	ENSG00000105072	cg10248733	rs3745325	C19orf44	0.170496	0.0284592	2.0868e-09	0.541814	protein_coding	TRUE	C19orf44
chr19	ENSG00000105072	cg10226967	rs3745325	C19orf44	-0.262215	0.0489035	8.23586e-08	0.891046	protein_coding	TRUE	C19orf44
chr19	ENSG00000105072	cg09024239	rs3745325	C19orf44	-0.160367	0.0323216	6.99181e-07	0.230426	protein_coding	TRUE	C19orf44
chr19	ENSG00000124302	cg18823272	rs111786665	CHST8	-2.98401	0.402042	1.15243e-13	0.940646	protein_coding	TRUE	CHST8
chr19	ENSG00000124302	cg02625404	rs111786665	CHST8	-2.37795	0.325677	2.84452e-13	0.966124	protein_coding	TRUE	CHST8
chr19	ENSG00000124302	cg21483110	rs111786665	CHST8	-0.582693	0.0869759	2.09173e-11	0.95658	protein_coding	TRUE	CHST8
chr19	ENSG00000124302	cg10358533	rs111786665	CHST8	1.13217	0.170572	3.19064e-11	0.806834	protein_coding	TRUE	CHST8
chr19	ENSG00000124302	cg13959523	rs111786665	CHST8	1.01554	0.153297	3.48113e-11	0.751039	protein_coding	TRUE	CHST8
chr19	ENSG00000124302	cg21266559	rs111786665	CHST8	1.19097	0.180576	4.24166e-11	0.443904	protein_coding	TRUE	CHST8
chr19	ENSG00000124302	cg17896573	rs111786665	CHST8	0.906846	0.139703	8.51405e-11	0.608567	protein_coding	TRUE	CHST8
chr19	ENSG00000124302	cg27198485	rs111786665	CHST8	0.821709	0.127826	1.28988e-10	0.855287	protein_coding	TRUE	CHST8
chr19	ENSG00000124302	cg08639586	rs111786665	CHST8	-0.648652	0.101074	1.38443e-10	0.839082	protein_coding	TRUE	CHST8
chr19	ENSG00000124302	cg12103265	rs111786665	CHST8	0.744214	0.116949	1.97101e-10	0.571644	protein_coding	TRUE	CHST8
chr19	ENSG00000124302	cg20439889	rs111786665	CHST8	0.893709	0.141348	2.56962e-10	0.980461	protein_coding	TRUE	CHST8
chr19	ENSG00000124302	cg22200289	rs111786665	CHST8	0.731669	0.117362	4.53866e-10	0.829554	protein_coding	TRUE	CHST8
chr19	ENSG00000124302	cg24739326	rs111786665	CHST8	0.553646	0.0964555	9.47243e-09	0.91055	protein_coding	TRUE	CHST8
chr19	ENSG00000124302	cg08400962	rs111786665	CHST8	-0.619883	0.116534	1.04159e-07	0.35839	protein_coding	TRUE	CHST8
chr19	ENSG00000171903	cg18812944	rs12459933	CYP4F11	0.0918068	0.0169303	5.87227e-08	0.552062	protein_coding	TRUE	CYP4F11
chr19	ENSG00000267594	cg02714994	rs11669449	CYP4F24P	0.346525	0.0506251	7.65112e-12	0.137971	unprocessed_pseudogene	TRUE	CYP4F24P
chr19	ENSG00000104823	cg00204262	rs71165584	ECH1	0.146066	0.0254581	9.60819e-09	0.964881	protein_coding	TRUE	ECH1
chr19	ENSG00000104823	cg25675800	rs71165584	ECH1	-0.156169	0.0278218	1.98638e-08	0.364979	protein_coding	TRUE	ECH1
chr19	ENSG00000104823	cg16982741	rs71165584	ECH1	-0.137315	0.0270203	3.73648e-07	0.710071	protein_coding	TRUE	ECH1
chr19	ENSG00000267757	cg08831348	rs6509227	EML2-AS1	-0.141753	0.0221385	1.5235e-10	0.152788	lncRNA	TRUE	EML2-AS1
chr19	ENSG00000267757	cg20681708	rs6509227	EML2-AS1	-0.159513	0.0250398	1.88578e-10	0.120628	lncRNA	TRUE	EML2-AS1
chr19	ENSG00000267757	cg18515250	rs6509227	EML2-AS1	-0.117885	0.0231115	3.38411e-07	0.124807	lncRNA	TRUE	EML2-AS1
chr19	ENSG00000104870	cg08059845	rs59774409	FCGRT	-0.238942	0.039455	1.39497e-09	0.902933	protein_coding	TRUE	FCGRT
chr19	ENSG00000104870	cg18108716	rs59774409	FCGRT	0.273084	0.0531853	2.82772e-07	0.0784366	protein_coding	TRUE	FCGRT
chr19	ENSG00000105325	cg05344495	rs10403057	FZR1	0.114407	0.0171633	2.6327e-11	0.169456	protein_coding	TRUE	FZR1
chr19	ENSG00000161609	cg20208858	rs11083972	KASH5	0.229309	0.0371962	7.05525e-10	0.879375	protein_coding	TRUE	CCDC155
chr19	ENSG00000129911	cg19687457	rs11666480	KLF16	-0.0543344	0.0084841	1.51104e-10	0.114738	protein_coding	TRUE	KLF16
chr19	ENSG00000129911	cg05970437	rs3746045	KLF16	0.0506977	0.0083149	1.07935e-09	0.078632	protein_coding	TRUE	KLF16
chr19	ENSG00000125912	cg13930790	rs490218	NCLN	-0.276677	0.0526434	1.47479e-07	0.43669	protein_coding	TRUE	NCLN
chr19	ENSG00000182013	cg14569776	rs3760832	PNMA8A	-0.0372837	0.00378987	7.74455e-23	0.375702	protein_coding	TRUE	PNMAL1
chr19	ENSG00000182013	cg22824998	rs3760832	PNMA8A	-0.0169657	0.00251545	1.53434e-11	0.120065	protein_coding	TRUE	PNMAL1
chr19	ENSG00000182013	cg27201673	rs3760832	PNMA8A	-0.0333862	0.00548289	1.13507e-09	0.0832424	protein_coding	TRUE	PNMAL1
chr19	ENSG00000105258	cg23890774	rs2231568	POLR2I	0.133586	0.0240265	2.69838e-08	0.113022	protein_coding	TRUE	POLR2I
chr19	ENSG00000077463	cg07492962	rs3760907	SIRT6	3.31452	0.571062	6.47022e-09	0.0945052	protein_coding	TRUE	SIRT6
chr19	ENSG00000077463	cg18542377	rs3760907	SIRT6	1.51862	0.262665	7.39909e-09	0.0553443	protein_coding	TRUE	SIRT6
chr19	ENSG00000077463	cg09617135	rs3760907	SIRT6	1.57866	0.280874	1.90377e-08	0.0513577	protein_coding	TRUE	SIRT6
chr19	ENSG00000077463	cg01287132	rs3760907	SIRT6	2.98708	0.545989	4.47595e-08	0.314919	protein_coding	TRUE	SIRT6
chr19	ENSG00000077463	cg23999422	rs3760907	SIRT6	1.98182	0.388313	3.33126e-07	0.427274	protein_coding	TRUE	SIRT6
chr19	ENSG00000178078	cg15797834	rs57631352	STAP2	-0.998231	0.149973	2.81228e-11	0.925378	protein_coding	TRUE	STAP2
chr19	ENSG00000178078	cg14516473	rs57631352	STAP2	0.853492	0.135472	2.97353e-10	0.306396	protein_coding	TRUE	STAP2
chr19	ENSG00000178078	cg05517572	rs57631352	STAP2	-0.781008	0.124901	4.02658e-10	0.475342	protein_coding	TRUE	STAP2
chr19	ENSG00000178078	cg02838499	rs57631352	STAP2	0.935009	0.160827	6.10918e-09	0.0549544	protein_coding	TRUE	STAP2
chr19	ENSG00000178078	cg25631746	rs57631352	STAP2	0.829447	0.157276	1.33615e-07	0.126206	protein_coding	TRUE	STAP2
chr19	ENSG00000178078	cg06063452	rs57631352	STAP2	-0.552792	0.107942	3.03613e-07	0.900755	protein_coding	TRUE	STAP2
chr19	ENSG00000178078	cg00852565	rs57631352	STAP2	0.463229	0.0932644	6.80546e-07	0.801937	protein_coding	TRUE	STAP2
chr19	ENSG00000105053	cg06577155	rs149219241	VRK3	-0.0212383	0.00388213	4.48056e-08	0.534967	protein_coding	TRUE	VRK3
chr19	ENSG00000105053	cg27161954	rs149219241	VRK3	-0.0173279	0.00320879	6.65885e-08	0.957004	protein_coding	TRUE	VRK3
chr19	ENSG00000105248	cg10826200	rs11671900	YJU2	0.524191	0.0953321	3.8287e-08	0.318192	protein_coding	TRUE	CCDC94
chr19	ENSG00000131849	cg13877915	rs7259841	ZNF132	-0.897906	0.107851	8.40459e-17	0.603702	protein_coding	TRUE	ZNF132
chr19	ENSG00000204920	cg10754510	rs62116613	ZNF155	-0.0545422	0.00996372	4.39787e-08	0.106016	protein_coding	TRUE	ZNF155
chr19	ENSG00000168661	cg26983177	rs55712935	ZNF30	-0.0528065	0.00769083	6.59532e-12	0.109289	protein_coding	TRUE	ZNF30
chr19	ENSG00000131845	cg00397851	rs3746226	ZNF304	-0.0529058	0.0105227	4.96236e-07	0.590322	protein_coding	TRUE	ZNF304
chr19	ENSG00000130803	cg16635176	rs17002013	ZNF317	-0.31095	0.0617457	4.75423e-07	0.653294	protein_coding	TRUE	ZNF317
chr19	ENSG00000203326	cg17492844	rs12978480	ZNF525	0.20972	0.0337223	5.00168e-10	0.393404	protein_coding	TRUE	ZNF525
chr19	ENSG00000188321	cg07967503	rs28384491	ZNF559	-0.0572461	0.0110333	2.11986e-07	0.175978	protein_coding	TRUE	ZNF559
chr19	ENSG00000188321	cg25619184	rs7251157	ZNF559	-0.0695403	0.0140748	7.78194e-07	0.941942	protein_coding	TRUE	ZNF559
chr19	ENSG00000213015	cg26209676	rs34506180	ZNF580	0.459884	0.0492777	1.03402e-20	0.816038	protein_coding	TRUE	ZNF580
chr19	ENSG00000213015	cg18477843	rs34506180	ZNF580	-0.129313	0.0211289	9.34508e-10	0.0743726	protein_coding	TRUE	ZNF580
chr19	ENSG00000197124	cg22239483	rs2286923	ZNF682	-0.263685	0.0385287	7.70949e-12	0.578328	protein_coding	TRUE	ZNF682
chr19	ENSG00000197124	cg15201536	rs2286923	ZNF682	0.855921	0.138432	6.2909e-10	0.615803	protein_coding	TRUE	ZNF682
chr19	ENSG00000197124	cg17771737	rs2286923	ZNF682	-0.321762	0.060943	1.29376e-07	0.434069	protein_coding	TRUE	ZNF682
chr19	ENSG00000173875	cg15327851	rs2861405	ZNF791	-0.0551776	0.00646771	1.44778e-17	0.898881	protein_coding	TRUE	ZNF791
chr19	ENSG00000173875	cg18469665	rs2861405	ZNF791	-0.024669	0.00376485	5.65993e-11	0.911648	protein_coding	TRUE	ZNF791
chr19	ENSG00000173875	cg08574423	rs2861405	ZNF791	-0.0336588	0.00550891	9.97031e-10	0.754488	protein_coding	TRUE	ZNF791
chr2	ENSG00000151694	cg12784422	rs12692386	ADAM17	-0.0255274	0.00354054	5.59388e-13	0.356509	protein_coding	TRUE	ADAM17
chr2	ENSG00000151694	cg16812701	rs12692386	ADAM17	-0.0309893	0.00461372	1.85779e-11	0.187355	protein_coding	TRUE	ADAM17
chr2	ENSG00000151694	cg08047252	rs12692386	ADAM17	-0.0231463	0.00444165	1.87615e-07	0.0921839	protein_coding	TRUE	ADAM17
chr2	ENSG00000235529	cg11045331	rs885539	AGAP1-IT1	-0.394911	0.0693595	1.24332e-08	0.201209	lncRNA	TRUE	AGAP1-IT1
chr2	ENSG00000173209	cg22446208	rs2600667	AHSA2P	0.0162809	0.00182696	5.03602e-19	0.064598	transcribed_unitary_pseudogene	TRUE	AHSA2
chr2	ENSG00000154518	cg17273725	rs58350508	ATP5MC3	-0.0257676	0.00400262	1.21313e-10	0.5416	protein_coding	TRUE	ATP5G3
chr2	ENSG00000154518	cg05223591	rs58350508	ATP5MC3	-0.0159143	0.00275139	7.29091e-09	0.0853937	protein_coding	TRUE	ATP5G3
chr2	ENSG00000138376	cg06344116	rs6715570	BARD1	-0.0732291	0.0106133	5.21027e-12	0.252486	protein_coding	TRUE	BARD1
chr2	ENSG00000136717	cg02611153	rs17014938	BIN1	-0.0167637	0.00275502	1.16648e-09	0.142114	protein_coding	TRUE	BIN1
chr2	ENSG00000136717	cg08560184	rs17014938	BIN1	-0.0152637	0.00268403	1.29392e-08	0.235389	protein_coding	TRUE	BIN1
chr2	ENSG00000136717	cg13182602	rs17014938	BIN1	-0.021307	0.00376291	1.49304e-08	0.720556	protein_coding	TRUE	BIN1
chr2	ENSG00000136717	cg13431910	rs17014938	BIN1	-0.0159746	0.00288473	3.06569e-08	0.219293	protein_coding	TRUE	BIN1
chr2	ENSG00000136717	cg11538967	rs17014938	BIN1	-0.0179135	0.00325432	3.70132e-08	0.713816	protein_coding	TRUE	BIN1
chr2	ENSG00000136717	cg06091295	rs17014938	BIN1	-0.0125543	0.00230704	5.27625e-08	0.801635	protein_coding	TRUE	BIN1
chr2	ENSG00000136717	cg07346182	rs17014938	BIN1	-0.0136074	0.00257945	1.32535e-07	0.843395	protein_coding	TRUE	BIN1
chr2	ENSG00000136717	cg06425843	rs17014938	BIN1	-0.012049	0.00233029	2.33339e-07	0.806268	protein_coding	TRUE	BIN1
chr2	ENSG00000176720	cg24828208	rs76993203	BOK	-0.18693	0.0279688	2.3329e-11	0.935688	protein_coding	TRUE	BOK
chr2	ENSG00000223658	cg13324389	rs13001285	C1GALT1C1L	-0.869393	0.143722	1.45615e-09	0.974779	protein_coding	TRUE	C1GALT1C1L
chr2	ENSG00000223658	cg08726338	rs13001285	C1GALT1C1L	-0.444722	0.0760606	5.00675e-09	0.950354	protein_coding	TRUE	C1GALT1C1L
chr2	ENSG00000223658	cg20563666	rs13001285	C1GALT1C1L	-0.683931	0.117735	6.28243e-09	0.891372	protein_coding	TRUE	C1GALT1C1L
chr2	ENSG00000223658	cg18817560	rs13001285	C1GALT1C1L	-0.748939	0.138288	6.1016e-08	0.965388	protein_coding	TRUE	C1GALT1C1L
chr2	ENSG00000223658	cg17110364	rs13001285	C1GALT1C1L	-0.701745	0.136777	2.88845e-07	0.364201	protein_coding	TRUE	C1GALT1C1L
chr2	ENSG00000223658	cg09325404	rs13001285	C1GALT1C1L	-0.510311	0.102225	5.97415e-07	0.907916	protein_coding	TRUE	C1GALT1C1L
chr2	ENSG00000042304	cg00335607	rs17370595	C2orf83	-0.461974	0.0635401	3.57926e-13	0.633809	protein_coding	TRUE	C2orf83
chr2	ENSG00000163006	cg22412063	rs201191699	CCDC138	-0.368178	0.0640604	9.06485e-09	0.250993	protein_coding	TRUE	CCDC138
chr2	ENSG00000163006	cg20757348	rs201191699	CCDC138	-0.464094	0.0926736	5.5047e-07	0.332465	protein_coding	TRUE	CCDC138
chr2	ENSG00000162994	cg26336264	rs17046778	CLHC1	-0.156182	0.0209222	8.33599e-14	0.397094	protein_coding	TRUE	CLHC1
chr2	ENSG00000162994	cg05027052	rs17046778	CLHC1	-0.16987	0.0239553	1.33014e-12	0.442432	protein_coding	TRUE	CLHC1
chr2	ENSG00000162994	cg02717117	rs17046778	CLHC1	-0.214794	0.031376	7.60395e-12	0.463408	protein_coding	TRUE	CLHC1
chr2	ENSG00000079785	cg06970082	rs73915402	DDX1	-0.0482581	0.00709183	1.01228e-11	0.919531	protein_coding	TRUE	DDX1
chr2	ENSG00000079785	cg24674087	rs73915402	DDX1	-0.0223686	0.00424676	1.3852e-07	0.986684	protein_coding	TRUE	DDX1
chr2	ENSG00000079785	cg14520482	rs73915402	DDX1	0.0292015	0.00563038	2.14389e-07	0.746673	protein_coding	TRUE	DDX1
chr2	ENSG00000079785	cg11502844	rs73915402	DDX1	0.0359969	0.00704611	3.24283e-07	0.66194	protein_coding	TRUE	DDX1
chr2	ENSG00000115486	cg23752985	rs6547621	GGCX	0.0428535	0.00539157	1.89166e-15	0.467301	protein_coding	TRUE	GGCX
chr2	ENSG00000115486	cg23410980	rs6547621	GGCX	0.0312689	0.00610852	3.07325e-07	0.968411	protein_coding	TRUE	GGCX
chr2	ENSG00000213626	cg04253876	rs906866	LBH	-0.00800978	0.00110161	3.56846e-13	0.439794	protein_coding	TRUE	LBH
chr2	ENSG00000213626	cg09199129	rs906866	LBH	-0.0149439	0.00205544	3.58366e-13	0.0841662	protein_coding	TRUE	LBH
chr2	ENSG00000213626	cg04683740	rs906866	LBH	-0.00608584	0.00111691	5.07071e-08	0.137499	protein_coding	TRUE	LBH
chr2	ENSG00000181798	cg06281680	rs28685161	LINC00471	0.311439	0.060596	2.7532e-07	0.185799	lncRNA	TRUE	LINC00471
chr2	ENSG00000134324	cg16440984	rs3795974	LPIN1	-0.00563621	0.000968099	5.81681e-09	0.860051	protein_coding	TRUE	LPIN1
chr2	ENSG00000134324	cg25654774	rs3795974	LPIN1	-0.0102454	0.00181852	1.76158e-08	0.807027	protein_coding	TRUE	LPIN1
chr2	ENSG00000134324	cg09295081	rs5829324	LPIN1	0.0528637	0.0101258	1.78263e-07	0.0644127	protein_coding	TRUE	LPIN1
chr2	ENSG00000134324	cg17916490	rs5829324	LPIN1	0.055282	0.0109742	4.7176e-07	0.0646821	protein_coding	TRUE	LPIN1
chr2	ENSG00000168702	cg22830273	rs10211565	LRP1B	-0.0958392	0.0161161	2.73411e-09	0.787079	protein_coding	TRUE	LRP1B
chr2	ENSG00000081479	cg08051321	rs36016897	LRP2	-0.00270425	0.000464863	5.98008e-09	0.242331	protein_coding	TRUE	LRP2
chr2	ENSG00000236682	cg09747827	rs12989081	MAP3K2-DT	0.0536217	0.0108893	8.46905e-07	0.132991	lncRNA	TRUE	AC068282.3
chr2	ENSG00000135972	cg09738100	rs7562169	MRPS9	0.0396135	0.00575294	5.74674e-12	0.318476	protein_coding	TRUE	MRPS9
chr2	ENSG00000135972	cg24470804	rs7562169	MRPS9	0.0386784	0.00586859	4.37633e-11	0.657428	protein_coding	TRUE	MRPS9
chr2	ENSG00000121152	cg12164063	rs4907311	NCAPH	-0.779296	0.0671095	3.56852e-31	0.801969	protein_coding	TRUE	NCAPH
chr2	ENSG00000121152	cg14860182	rs4907311	NCAPH	0.206963	0.0265469	6.38427e-15	0.144976	protein_coding	TRUE	NCAPH
chr2	ENSG00000121152	cg18140058	rs4907311	NCAPH	0.197462	0.0281045	2.12513e-12	0.266803	protein_coding	TRUE	NCAPH
chr2	ENSG00000121152	cg06277347	rs4907311	NCAPH	0.15799	0.0230545	7.23644e-12	0.0826972	protein_coding	TRUE	NCAPH
chr2	ENSG00000121152	cg08983217	rs4907311	NCAPH	0.148652	0.0247225	1.82336e-09	0.0601735	protein_coding	TRUE	NCAPH
chr2	ENSG00000121152	cg18419276	rs4907311	NCAPH	-0.278433	0.0477099	5.34832e-09	0.0600506	protein_coding	TRUE	NCAPH
chr2	ENSG00000121152	cg19744723	rs4907311	NCAPH	0.0794101	0.0155334	3.18414e-07	0.171894	protein_coding	TRUE	NCAPH
chr2	ENSG00000162878	cg25276246	rs4952398	PKDCC	-0.0311171	0.00591494	1.43463e-07	0.96873	protein_coding	TRUE	PKDCC
chr2	ENSG00000221823	cg15482884	rs11343435	PPP3R1	0.0391885	0.0067345	5.91788e-09	0.206871	protein_coding	TRUE	PPP3R1
chr2	ENSG00000115841	cg19119231	rs6738875	RMDN2	-0.114577	0.0225668	3.82972e-07	0.822373	protein_coding	TRUE	RMDN2
chr2	ENSG00000115310	cg09592903	rs2255112	RTN4	-0.00215688	0.00033958	2.13075e-10	0.137239	protein_coding	TRUE	RTN4
chr2	ENSG00000115902	cg20698421	rs7585341	SLC1A4	-0.0449046	0.00716552	3.6865e-10	0.399173	protein_coding	TRUE	SLC1A4
chr2	ENSG00000115902	cg19220282	rs7585341	SLC1A4	-0.0501803	0.00805934	4.77415e-10	0.653393	protein_coding	TRUE	SLC1A4
chr2	ENSG00000115902	cg23831876	rs7585341	SLC1A4	-0.0326513	0.00576098	1.44758e-08	0.830167	protein_coding	TRUE	SLC1A4
chr2	ENSG00000144115	cg26963093	rs6547757	THNSL2	-0.0960823	0.0082024	1.08156e-31	0.529239	protein_coding	TRUE	THNSL2
chr2	ENSG00000144115	cg24977027	rs6547757	THNSL2	-0.0470119	0.00497186	3.21163e-21	0.894447	protein_coding	TRUE	THNSL2
chr2	ENSG00000144115	cg14558114	rs6547757	THNSL2	-0.0364504	0.00462458	3.22464e-15	0.193412	protein_coding	TRUE	THNSL2
chr2	ENSG00000144115	cg08925102	rs6547757	THNSL2	-0.0189546	0.00304253	4.66783e-10	0.57358	protein_coding	TRUE	THNSL2
chr2	ENSG00000151353	cg17611880	rs3749138	TMEM18	0.254507	0.0386657	4.63408e-11	0.688385	protein_coding	TRUE	TMEM18
chr2	ENSG00000151353	cg18263335	rs3749138	TMEM18	0.351608	0.054013	7.52978e-11	0.289398	protein_coding	TRUE	TMEM18
chr2	ENSG00000151353	cg27237671	rs3749138	TMEM18	0.241293	0.0396494	1.16011e-09	0.155059	protein_coding	TRUE	TMEM18
chr2	ENSG00000115993	cg25748441	rs2540334	TRAK2	0.028443	0.00568783	5.71282e-07	0.18907	protein_coding	TRUE	TRAK2
chr2	ENSG00000171853	cg13173536	rs7573231	TRAPPC12	-0.362954	0.0584425	5.28316e-10	0.691477	protein_coding	TRUE	TRAPPC12
chr2	ENSG00000171853	cg24812398	rs7573231	TRAPPC12	-0.2938	0.0488855	1.85564e-09	0.87545	protein_coding	TRUE	TRAPPC12
chr2	ENSG00000196151	cg04331189	rs72229999	WDSUB1	-0.0995464	0.0173657	9.90406e-09	0.380851	protein_coding	TRUE	WDSUB1
chr2	ENSG00000075292	cg14958017	rs17743415	ZNF638	0.0179297	0.00320957	2.31938e-08	0.116174	protein_coding	TRUE	ZNF638
chr20	ENSG00000089101	cg09204890	rs6075607	CFAP61	-0.850096	0.164724	2.46005e-07	0.0786516	protein_coding	TRUE	CFAP61
chr20	ENSG00000089101	cg24128784	rs6075607	CFAP61	-0.842404	0.169138	6.33977e-07	0.110697	protein_coding	TRUE	CFAP61
chr20	ENSG00000214078	cg13704028	rs6060524	CPNE1	-0.0567016	0.0105432	7.5303e-08	0.193137	protein_coding	TRUE	CPNE1
chr20	ENSG00000101191	cg12287702	rs2273412	DIDO1	-0.0470691	0.00929864	4.15019e-07	0.820254	protein_coding	TRUE	DIDO1
chr20	ENSG00000124145	cg22680020	rs2267868	SDC4	-0.0414957	0.00821569	4.40006e-07	0.416073	protein_coding	TRUE	SDC4
chr20	ENSG00000100987	cg13981425	rs6076315	VSX1	-0.0448412	0.00710031	2.69492e-10	0.355842	protein_coding	TRUE	VSX1
chr20	ENSG00000100987	cg03494837	rs6076315	VSX1	-0.0239683	0.00401129	2.29789e-09	0.228457	protein_coding	TRUE	VSX1
chr20	ENSG00000100987	cg14049295	rs6076315	VSX1	0.0284101	0.00538433	1.31713e-07	0.0609574	protein_coding	TRUE	VSX1
chr21	ENSG00000157578	cg12638745	rs73367987	LCA5L	0.536798	0.0885767	1.35898e-09	0.547526	protein_coding	TRUE	LCA5L
chr21	ENSG00000157578	cg11766498	rs73367987	LCA5L	-0.22789	0.0410621	2.85844e-08	0.0712662	protein_coding	TRUE	LCA5L
chr21	ENSG00000157578	cg06148396	rs73367987	LCA5L	-0.276796	0.054576	3.94159e-07	0.215163	protein_coding	TRUE	LCA5L
chr21	ENSG00000157578	cg04418027	rs73367987	LCA5L	-0.189088	0.0381453	7.15779e-07	0.872013	protein_coding	TRUE	LCA5L
chr21	ENSG00000185437	cg06148396	rs77199433	SH3BGR	-0.115844	0.0149483	9.2154e-15	0.159518	protein_coding	TRUE	SH3BGR
chr21	ENSG00000185437	cg15616257	rs77199433	SH3BGR	-0.0674009	0.0101012	2.51352e-11	0.14531	protein_coding	TRUE	SH3BGR
chr21	ENSG00000185437	cg04418027	rs77199433	SH3BGR	-0.0640473	0.010842	3.47699e-09	0.418424	protein_coding	TRUE	SH3BGR
chr21	ENSG00000185437	cg11778840	rs77199433	SH3BGR	-0.0771229	0.0135345	1.21046e-08	0.137916	protein_coding	TRUE	SH3BGR
chr21	ENSG00000160190	cg20002045	rs12482057	SLC37A1	0.192769	0.0391982	8.75182e-07	0.351698	protein_coding	TRUE	SLC37A1
chr21	ENSG00000182670	cg21832243	rs1155786	TTC3	-0.00991963	0.000702591	2.91594e-45	0.515906	protein_coding	TRUE	TTC3
chr21	ENSG00000182670	cg00302270	rs1155786	TTC3	-0.00443775	0.00038383	6.43653e-31	0.841367	protein_coding	TRUE	TTC3
chr21	ENSG00000182670	cg13090364	rs1155786	TTC3	-0.00354844	0.000324191	6.98086e-28	0.593107	protein_coding	TRUE	TTC3
chr21	ENSG00000182670	cg25325315	rs1155786	TTC3	-0.00176718	0.000353406	5.7202e-07	0.597867	protein_coding	TRUE	TTC3
chr22	ENSG00000185065	cg26643617	rs149217901	AC000068.1	0.507577	0.071137	9.6643e-13	0.155606	lncRNA	TRUE	AC000068.5
chr22	ENSG00000093072	cg21538064	rs17807317	ADA2	-0.0386787	0.00347205	8.00819e-29	0.0964169	protein_coding	TRUE	CECR1
chr22	ENSG00000093072	cg27534599	rs17807317	ADA2	-0.0347751	0.00330388	6.58887e-26	0.108512	protein_coding	TRUE	CECR1
chr22	ENSG00000093072	cg17333767	rs17807317	ADA2	-0.0332797	0.00324725	1.20112e-24	0.0774413	protein_coding	TRUE	CECR1
chr22	ENSG00000093072	cg13248581	rs17807317	ADA2	-0.0293508	0.00352593	8.48494e-17	0.134485	protein_coding	TRUE	CECR1
chr22	ENSG00000099968	cg08559357	rs725769	BCL2L13	0.014758	0.0024412	1.4904e-09	0.618003	protein_coding	TRUE	BCL2L13
chr22	ENSG00000280384	cg05089215	rs135539	FP325332.1	-2.77327	0.532776	1.93664e-07	0.891685	lncRNA	TRUE	RP4-695O20.1
chr22	ENSG00000280384	cg12672222	rs135539	FP325332.1	-1.91275	0.375029	3.39149e-07	0.212948	lncRNA	TRUE	RP4-695O20.1
chr22	ENSG00000280384	cg16803515	rs135539	FP325332.1	-2.12677	0.417691	3.54799e-07	0.49872	lncRNA	TRUE	RP4-695O20.1
chr22	ENSG00000280384	cg07410461	rs135539	FP325332.1	-2.84214	0.559793	3.83207e-07	0.742224	lncRNA	TRUE	RP4-695O20.1
chr22	ENSG00000280384	cg02543147	rs135539	FP325332.1	-2.09148	0.413257	4.17159e-07	0.694685	lncRNA	TRUE	RP4-695O20.1
chr22	ENSG00000280384	cg15184044	rs135539	FP325332.1	-1.66182	0.332009	5.57646e-07	0.780221	lncRNA	TRUE	RP4-695O20.1
chr22	ENSG00000280384	cg23159233	rs135539	FP325332.1	-2.04238	0.411418	6.89715e-07	0.867732	lncRNA	TRUE	RP4-695O20.1
chr22	ENSG00000280384	cg08846053	rs135539	FP325332.1	-2.25651	0.458015	8.36177e-07	0.840947	lncRNA	TRUE	RP4-695O20.1
chr22	ENSG00000186951	cg05089215	rs135549	PPARA	-0.0182511	0.00195044	8.17136e-21	0.327541	protein_coding	TRUE	PPARA
chr22	ENSG00000186951	cg16803515	rs135549	PPARA	-0.01402	0.00159442	1.45438e-18	0.59988	protein_coding	TRUE	PPARA
chr22	ENSG00000186951	cg07410461	rs135549	PPARA	-0.0187546	0.00214727	2.45469e-18	0.553451	protein_coding	TRUE	PPARA
chr22	ENSG00000186951	cg02543147	rs135549	PPARA	-0.0138064	0.00159392	4.64087e-18	0.320806	protein_coding	TRUE	PPARA
chr22	ENSG00000186951	cg08846053	rs135549	PPARA	-0.015702	0.00182146	6.66268e-18	0.281567	protein_coding	TRUE	PPARA
chr22	ENSG00000186951	cg15184044	rs135549	PPARA	-0.0111417	0.00129953	1.00291e-17	0.193155	protein_coding	TRUE	PPARA
chr22	ENSG00000186951	cg12672222	rs135549	PPARA	-0.0117085	0.00145421	8.18211e-16	0.409816	protein_coding	TRUE	PPARA
chr22	ENSG00000186951	cg23159233	rs135549	PPARA	-0.0132226	0.00164582	9.43104e-16	0.502517	protein_coding	TRUE	PPARA
chr22	ENSG00000186951	cg23403084	rs135549	PPARA	-0.0107808	0.00140503	1.68038e-14	0.270787	protein_coding	TRUE	PPARA
chr22	ENSG00000186951	cg12490598	rs135549	PPARA	-0.0107719	0.00154582	3.20548e-12	0.206304	protein_coding	TRUE	PPARA
chr22	ENSG00000186951	cg05691848	rs135549	PPARA	-0.0114392	0.00164715	3.78984e-12	0.477913	protein_coding	TRUE	PPARA
chr22	ENSG00000186951	cg20589873	rs135549	PPARA	-0.00883664	0.00131821	2.03478e-11	0.230534	protein_coding	TRUE	PPARA
chr22	ENSG00000186951	cg24101990	rs135549	PPARA	-0.00990424	0.00151573	6.38998e-11	0.169386	protein_coding	TRUE	PPARA
chr22	ENSG00000186951	cg13252075	rs135549	PPARA	-0.00829235	0.00127023	6.65436e-11	0.594507	protein_coding	TRUE	PPARA
chr22	ENSG00000186951	cg12445256	rs135549	PPARA	-0.00733473	0.00112563	7.21472e-11	0.968741	protein_coding	TRUE	PPARA
chr22	ENSG00000100034	cg03086022	rs240066	PPM1F	-0.368468	0.07043	1.67973e-07	0.181018	protein_coding	TRUE	PPM1F
chr22	ENSG00000100276	cg07256473	rs6006090	RASL10A	-0.843398	0.138926	1.27248e-09	0.174983	protein_coding	TRUE	RASL10A
chr22	ENSG00000100276	cg14427074	rs6006090	RASL10A	-0.584452	0.101406	8.23992e-09	0.141169	protein_coding	TRUE	RASL10A
chr22	ENSG00000100276	cg08118034	rs6006090	RASL10A	-0.484767	0.0893735	5.82626e-08	0.595726	protein_coding	TRUE	RASL10A
chr22	ENSG00000100276	cg17758280	rs6006090	RASL10A	0.224747	0.0419413	8.38717e-08	0.194761	protein_coding	TRUE	RASL10A
chr22	ENSG00000100276	cg02241145	rs6006090	RASL10A	-0.451757	0.0843876	8.63354e-08	0.60159	protein_coding	TRUE	RASL10A
chr22	ENSG00000100276	cg05944207	rs6006090	RASL10A	0.79602	0.149139	9.42628e-08	0.204162	protein_coding	TRUE	RASL10A
chr22	ENSG00000100276	cg08569842	rs6006090	RASL10A	1.06287	0.199761	1.03358e-07	0.522634	protein_coding	TRUE	RASL10A
chr22	ENSG00000100276	cg08579858	rs6006090	RASL10A	-0.416929	0.0828912	4.90903e-07	0.128858	protein_coding	TRUE	RASL10A
chr22	ENSG00000100276	cg00057476	rs6006090	RASL10A	-0.36856	0.0734548	5.23438e-07	0.321869	protein_coding	TRUE	RASL10A
chr22	ENSG00000128408	cg15911859	rs2272804	RIBC2	-0.828952	0.10873	2.46044e-14	0.503297	protein_coding	TRUE	RIBC2
chr22	ENSG00000128408	cg20078119	rs2272804	RIBC2	-0.612214	0.0844681	4.2339e-13	0.846049	protein_coding	TRUE	RIBC2
chr22	ENSG00000128408	cg18180155	rs2272804	RIBC2	-0.66375	0.0948159	2.55225e-12	0.285964	protein_coding	TRUE	RIBC2
chr22	ENSG00000128408	cg08066140	rs2272804	RIBC2	-0.521002	0.092174	1.58246e-08	0.577619	protein_coding	TRUE	RIBC2
chr22	ENSG00000128408	cg23503501	rs2272804	RIBC2	-0.53469	0.0952464	1.97982e-08	0.0722068	protein_coding	TRUE	RIBC2
chr22	ENSG00000100218	cg21100191	rs2301554	RSPH14	-1.62293	0.176898	4.54161e-20	0.1462	protein_coding	TRUE	RSPH14
chr22	ENSG00000100218	cg24049841	rs2301554	RSPH14	-3.06341	0.336701	9.17491e-20	0.0671572	protein_coding	TRUE	RSPH14
chr22	ENSG00000100218	cg14186256	rs2301554	RSPH14	-1.24518	0.157121	2.28225e-15	0.0975622	protein_coding	TRUE	RSPH14
chr22	ENSG00000100218	cg18467551	rs2301554	RSPH14	-2.04366	0.262342	6.69887e-15	0.479046	protein_coding	TRUE	RSPH14
chr22	ENSG00000100218	cg14458815	rs2301554	RSPH14	-0.581929	0.0869931	2.24129e-11	0.18008	protein_coding	TRUE	RSPH14
chr22	ENSG00000100218	cg15572787	rs2301554	RSPH14	-0.717175	0.116268	6.90409e-10	0.272864	protein_coding	TRUE	RSPH14
chr22	ENSG00000100218	cg19878762	rs2301554	RSPH14	-0.41706	0.0835929	6.06352e-07	0.101617	protein_coding	TRUE	RSPH14
chr22	ENSG00000138944	cg09754851	rs7511306	SHISAL1	-0.0629547	0.00846995	1.06395e-13	0.557873	protein_coding	TRUE	KIAA1644
chr22	ENSG00000138944	cg11099027	rs7511306	SHISAL1	-0.0519556	0.00827316	3.38526e-10	0.215105	protein_coding	TRUE	KIAA1644
chr22	ENSG00000138944	cg20185005	rs7511306	SHISAL1	0.024041	0.00422793	1.29873e-08	0.410203	protein_coding	TRUE	KIAA1644
chr22	ENSG00000138944	cg01527551	rs7511306	SHISAL1	-0.0373709	0.00668796	2.29971e-08	0.280798	protein_coding	TRUE	KIAA1644
chr22	ENSG00000100304	cg16973269	rs73163910	TTLL12	-0.234699	0.0363421	1.06057e-10	0.275402	protein_coding	TRUE	TTLL12
chr3	ENSG00000255021	cg16991944	rs9869724	AC093496.1	-0.190639	0.0146133	6.73343e-39	0.0551326	lncRNA	TRUE	RP11-536I6.2
chr3	ENSG00000255021	cg20533576	rs9869724	AC093496.1	-0.121769	0.0103305	4.53724e-32	0.50339	lncRNA	TRUE	RP11-536I6.2
chr3	ENSG00000255021	cg12790627	rs9869724	AC093496.1	-0.090596	0.00802445	1.47049e-29	0.518539	lncRNA	TRUE	RP11-536I6.2
chr3	ENSG00000255021	cg08104207	rs9869724	AC093496.1	-0.0471492	0.00673902	2.62536e-12	0.280083	lncRNA	TRUE	RP11-536I6.2
chr3	ENSG00000255021	cg02555923	rs9869724	AC093496.1	-0.0505057	0.00740034	8.80569e-12	0.178836	lncRNA	TRUE	RP11-536I6.2
chr3	ENSG00000255021	cg13544074	rs9869724	AC093496.1	-0.0312125	0.00577836	6.60388e-08	0.286937	lncRNA	TRUE	RP11-536I6.2
chr3	ENSG00000196776	cg08932533	rs17231503	CD47	-0.00762547	0.000672958	9.1852e-30	0.147404	protein_coding	TRUE	CD47
chr3	ENSG00000196776	cg06806080	rs17231503	CD47	-0.0050356	0.000451207	6.3791e-29	0.140569	protein_coding	TRUE	CD47
chr3	ENSG00000196776	cg03187166	rs17231503	CD47	-0.00632221	0.000571429	1.87844e-28	0.305906	protein_coding	TRUE	CD47
chr3	ENSG00000196776	cg00492070	rs17231503	CD47	-0.00460966	0.000438353	7.30131e-26	0.0868405	protein_coding	TRUE	CD47
chr3	ENSG00000196776	cg12422228	rs17231503	CD47	-0.00432631	0.000422093	1.18744e-24	0.135281	protein_coding	TRUE	CD47
chr3	ENSG00000196776	cg22029806	rs17231503	CD47	-0.00349192	0.000375543	1.42681e-20	0.7474	protein_coding	TRUE	CD47
chr3	ENSG00000196776	cg02487233	rs17231503	CD47	-0.00335634	0.000362028	1.84536e-20	0.110941	protein_coding	TRUE	CD47
chr3	ENSG00000196776	cg11741004	rs17231503	CD47	-0.00329558	0.000382673	7.17884e-18	0.348868	protein_coding	TRUE	CD47
chr3	ENSG00000196776	cg03040360	rs17231503	CD47	0.00108484	0.0001681	1.09274e-10	0.185508	protein_coding	TRUE	CD47
chr3	ENSG00000114744	cg02056062	rs11354448	COMMD2	-0.0916518	0.0185507	7.78741e-07	0.0775138	protein_coding	TRUE	COMMD2
chr3	ENSG00000114744	cg21951391	rs11354448	COMMD2	-0.0811482	0.0164751	8.41361e-07	0.105557	protein_coding	TRUE	COMMD2
chr3	ENSG00000090520	cg09771827	rs12330875	DNAJB11	-0.372225	0.0748568	6.60957e-07	0.881893	protein_coding	TRUE	DNAJB11
chr3	ENSG00000163913	cg16516295	rs2260840	IFT122	0.133351	0.0224449	2.82872e-09	0.226238	protein_coding	TRUE	IFT122
chr3	ENSG00000163913	cg08049441	rs2260840	IFT122	0.113393	0.0217595	1.87613e-07	0.0856013	protein_coding	TRUE	IFT122
chr3	ENSG00000163913	cg08787647	rs2260840	IFT122	0.11634	0.0230464	4.46323e-07	0.145864	protein_coding	TRUE	IFT122
chr3	ENSG00000171757	cg08193579	rs9878797	LRRC34	-0.130046	0.0159693	3.83935e-16	0.686973	protein_coding	TRUE	LRRC34
chr3	ENSG00000171757	cg24655016	rs9878797	LRRC34	-0.116097	0.0164786	1.85026e-12	0.197058	protein_coding	TRUE	LRRC34
chr3	ENSG00000171757	cg12358524	rs9878797	LRRC34	-0.119774	0.0172889	4.27421e-12	0.154069	protein_coding	TRUE	LRRC34
chr3	ENSG00000171757	cg12397426	rs9878797	LRRC34	-0.113443	0.0165441	7.0314e-12	0.165558	protein_coding	TRUE	LRRC34
chr3	ENSG00000171757	cg27536453	rs9878797	LRRC34	-0.116998	0.0175153	2.39329e-11	0.109444	protein_coding	TRUE	LRRC34
chr3	ENSG00000171757	cg08095637	rs9878797	LRRC34	-0.115822	0.0173575	2.51047e-11	0.18816	protein_coding	TRUE	LRRC34
chr3	ENSG00000171757	cg00832555	rs9878797	LRRC34	-0.0960752	0.0149202	1.20037e-10	0.195898	protein_coding	TRUE	LRRC34
chr3	ENSG00000171757	cg27467234	rs9878797	LRRC34	-0.0781906	0.0122889	1.98248e-10	0.302319	protein_coding	TRUE	LRRC34
chr3	ENSG00000171757	cg04714994	rs9878797	LRRC34	-0.0604188	0.00977261	6.311e-10	0.229445	protein_coding	TRUE	LRRC34
chr3	ENSG00000171757	cg16306190	rs9878797	LRRC34	-0.188809	0.030631	7.09285e-10	0.264357	protein_coding	TRUE	LRRC34
chr3	ENSG00000171757	cg02860240	rs9878797	LRRC34	-0.105364	0.0174462	1.54733e-09	0.605066	protein_coding	TRUE	LRRC34
chr3	ENSG00000171757	cg05344026	rs9878797	LRRC34	-0.0687419	0.0116701	3.85161e-09	0.501031	protein_coding	TRUE	LRRC34
chr3	ENSG00000171757	cg23707559	rs9878797	LRRC34	-0.109427	0.0187947	5.80617e-09	0.326744	protein_coding	TRUE	LRRC34
chr3	ENSG00000144821	cg07891854	rs936266	MYH15	0.105715	0.0181635	5.87944e-09	0.344989	protein_coding	TRUE	MYH15
chr3	ENSG00000241570	cg00831726	rs251488	PAQR9-AS1	-0.224833	0.0294604	2.31688e-14	0.624543	lncRNA	TRUE	PAQR9-AS1
chr3	ENSG00000241570	cg08113027	rs251488	PAQR9-AS1	-0.113629	0.0193501	4.29814e-09	0.681325	lncRNA	TRUE	PAQR9-AS1
chr3	ENSG00000251474	cg12873189	rs12631122	RPL32P3	0.0937234	0.0177677	1.32816e-07	0.946743	transcribed_unprocessed_pseudogene	TRUE	RPL32P3
chr3	ENSG00000251474	cg25441467	rs12631122	RPL32P3	0.0959557	0.0188901	3.78063e-07	0.878502	transcribed_unprocessed_pseudogene	TRUE	RPL32P3
chr3	ENSG00000093183	cg02606505	rs639692	SEC22C	0.068092	0.0137811	7.77321e-07	0.852726	protein_coding	TRUE	SEC22C
chr3	ENSG00000153560	cg22797653	rs144129108	UBP1	-0.0683064	0.00994519	6.49786e-12	0.255412	protein_coding	TRUE	UBP1
chr3	ENSG00000153560	cg04439720	rs144129108	UBP1	-0.0401543	0.00610904	4.93348e-11	0.957893	protein_coding	TRUE	UBP1
chr3	ENSG00000156931	cg16460462	rs7640976	VPS8	-0.0843237	0.0134529	3.65552e-10	0.142589	protein_coding	TRUE	VPS8
chr3	ENSG00000156931	cg27398070	rs7640976	VPS8	0.0447907	0.00731806	9.32412e-10	0.117233	protein_coding	TRUE	VPS8
chr3	ENSG00000177311	cg04352534	rs2871960	ZBTB38	-0.0878426	0.0130801	1.87106e-11	0.818432	protein_coding	TRUE	ZBTB38
chr3	ENSG00000177311	cg11421029	rs2871960	ZBTB38	-0.0711516	0.0108678	5.87049e-11	0.762452	protein_coding	TRUE	ZBTB38
chr3	ENSG00000177311	cg21380154	rs2871960	ZBTB38	-0.0573529	0.00903864	2.21996e-10	0.356892	protein_coding	TRUE	ZBTB38
chr3	ENSG00000177311	cg02936049	rs2871960	ZBTB38	-0.0664893	0.0105408	2.83068e-10	0.44618	protein_coding	TRUE	ZBTB38
chr3	ENSG00000177311	cg03848978	rs2871960	ZBTB38	-0.0484064	0.00794192	1.09398e-09	0.912244	protein_coding	TRUE	ZBTB38
chr3	ENSG00000177311	cg06820102	rs2871960	ZBTB38	-0.0717952	0.012026	2.37254e-09	0.980963	protein_coding	TRUE	ZBTB38
chr3	ENSG00000177311	cg10394922	rs2871960	ZBTB38	-0.0297284	0.00540691	3.83629e-08	0.870824	protein_coding	TRUE	ZBTB38
chr4	ENSG00000197894	cg24747012	rs1154410	ADH5	-0.136769	0.027023	4.16587e-07	0.363248	protein_coding	TRUE	ADH5
chr4	ENSG00000145246	cg14559075	rs11724087	ATP10D	-0.0464233	0.00735216	2.71487e-10	0.449485	protein_coding	TRUE	ATP10D
chr4	ENSG00000145246	cg22764341	rs11724087	ATP10D	-0.0435629	0.00709906	8.43975e-10	0.270856	protein_coding	TRUE	ATP10D
chr4	ENSG00000124406	cg03640051	rs1460357	ATP8A1	-0.0147063	0.00179128	2.21319e-16	0.413119	protein_coding	TRUE	ATP8A1
chr4	ENSG00000124406	cg15927566	rs1460357	ATP8A1	-0.00862046	0.00116367	1.28219e-13	0.180472	protein_coding	TRUE	ATP8A1
chr4	ENSG00000124406	cg07557423	rs1460357	ATP8A1	-0.0115482	0.00168044	6.32423e-12	0.295214	protein_coding	TRUE	ATP8A1
chr4	ENSG00000124406	cg17280671	rs1460357	ATP8A1	-0.00729539	0.00132271	3.47811e-08	0.392945	protein_coding	TRUE	ATP8A1
chr4	ENSG00000168491	cg19022908	rs9999033	CCDC110	0.213261	0.0339273	3.2613e-10	0.0874574	protein_coding	TRUE	CCDC110
chr4	ENSG00000168491	cg04857710	rs9999033	CCDC110	-0.657468	0.115163	1.13619e-08	0.39128	protein_coding	TRUE	CCDC110
chr4	ENSG00000164323	cg01881046	rs3108296	CFAP97	-0.0783389	0.00607464	4.73744e-38	0.769429	protein_coding	TRUE	CFAP97
chr4	ENSG00000164323	cg08240002	rs3108296	CFAP97	-0.0923007	0.00725278	4.22651e-37	0.871243	protein_coding	TRUE	CFAP97
chr4	ENSG00000164323	cg12836958	rs3108296	CFAP97	-0.0469665	0.0041933	4.06061e-29	0.884781	protein_coding	TRUE	CFAP97
chr4	ENSG00000164323	cg21907850	rs3108296	CFAP97	-0.0319916	0.00300903	2.1187e-26	0.612143	protein_coding	TRUE	CFAP97
chr4	ENSG00000164323	cg15478081	rs3108296	CFAP97	-0.0238276	0.00293406	4.62277e-16	0.98508	protein_coding	TRUE	CFAP97
chr4	ENSG00000164323	cg17998594	rs3108296	CFAP97	-0.0236418	0.00325441	3.74286e-13	0.511459	protein_coding	TRUE	CFAP97
chr4	ENSG00000164323	cg02207086	rs3108296	CFAP97	-0.0218246	0.00381171	1.03025e-08	0.357586	protein_coding	TRUE	CFAP97
chr4	ENSG00000134852	cg27132802	rs10529258	CLOCK	0.0627423	0.0100376	4.08492e-10	0.671225	protein_coding	TRUE	CLOCK
chr4	ENSG00000109472	cg01925521	rs13110854	CPE	-0.0036741	0.000723257	3.77566e-07	0.076221	protein_coding	TRUE	CPE
chr4	ENSG00000196810	cg08948841	rs3775094	CTBP1-DT	0.360034	0.0416635	5.54906e-18	0.613801	lncRNA	TRUE	CTBP1-AS2
chr4	ENSG00000196810	cg26479374	rs3775094	CTBP1-DT	0.294242	0.0395908	1.06899e-13	0.420756	lncRNA	TRUE	CTBP1-AS2
chr4	ENSG00000196810	cg25897951	rs3775094	CTBP1-DT	0.258686	0.0361481	8.28894e-13	0.337783	lncRNA	TRUE	CTBP1-AS2
chr4	ENSG00000196810	cg04122972	rs3775094	CTBP1-DT	0.219122	0.0330835	3.51298e-11	0.610907	lncRNA	TRUE	CTBP1-AS2
chr4	ENSG00000196810	cg10932140	rs3775094	CTBP1-DT	0.169288	0.0257408	4.81111e-11	0.387654	lncRNA	TRUE	CTBP1-AS2
chr4	ENSG00000196810	cg13281248	rs3775094	CTBP1-DT	0.136388	0.023368	5.32983e-09	0.495191	lncRNA	TRUE	CTBP1-AS2
chr4	ENSG00000196810	cg04703765	rs3775094	CTBP1-DT	0.128007	0.0220123	6.05372e-09	0.227849	lncRNA	TRUE	CTBP1-AS2
chr4	ENSG00000196810	cg07745915	rs3775094	CTBP1-DT	0.163534	0.0284388	8.90416e-09	0.647928	lncRNA	TRUE	CTBP1-AS2
chr4	ENSG00000196810	cg16399632	rs3775094	CTBP1-DT	0.208644	0.0399144	1.72017e-07	0.203545	lncRNA	TRUE	CTBP1-AS2
chr4	ENSG00000181381	cg11351471	rs56999040	DDX60L	-0.0386264	0.00404803	1.40077e-21	0.680133	protein_coding	TRUE	DDX60L
chr4	ENSG00000181381	cg12960369	rs56999040	DDX60L	-0.0324031	0.00453158	8.64619e-13	0.693754	protein_coding	TRUE	DDX60L
chr4	ENSG00000181381	cg24843443	rs56999040	DDX60L	-0.0334612	0.00469458	1.02122e-12	0.456075	protein_coding	TRUE	DDX60L
chr4	ENSG00000181381	cg06650861	rs56999040	DDX60L	-0.0187166	0.00291219	1.30169e-10	0.197675	protein_coding	TRUE	DDX60L
chr4	ENSG00000181381	cg13198594	rs56999040	DDX60L	-0.0145171	0.00254418	1.15665e-08	0.409011	protein_coding	TRUE	DDX60L
chr4	ENSG00000250486	cg06481168	rs3733419	FAM218A	0.55654	0.106935	1.94568e-07	0.537087	lncRNA	TRUE	FAM218A
chr4	ENSG00000109519	cg26116260	rs2358718	GRPEL1	-0.0479531	0.00499664	8.22453e-22	0.210379	protein_coding	TRUE	GRPEL1
chr4	ENSG00000109519	cg06697600	rs2358718	GRPEL1	0.0688597	0.00742351	1.76123e-20	0.237988	protein_coding	TRUE	GRPEL1
chr4	ENSG00000109519	cg19539972	rs2358718	GRPEL1	-0.0479312	0.00574716	7.43049e-17	0.477003	protein_coding	TRUE	GRPEL1
chr4	ENSG00000109519	cg24709285	rs2358718	GRPEL1	-0.0376171	0.00598524	3.27924e-10	0.216172	protein_coding	TRUE	GRPEL1
chr4	ENSG00000109519	cg23757056	rs2358718	GRPEL1	-0.077	0.0132359	5.97279e-09	0.887137	protein_coding	TRUE	GRPEL1
chr4	ENSG00000109519	cg25660036	rs2358718	GRPEL1	0.046858	0.00809455	7.08783e-09	0.743237	protein_coding	TRUE	GRPEL1
chr4	ENSG00000109519	cg17480221	rs2358718	GRPEL1	-0.0419708	0.00726787	7.70236e-09	0.885787	protein_coding	TRUE	GRPEL1
chr4	ENSG00000138796	cg12133491	rs11316445	HADH	-0.230881	0.0289476	1.51364e-15	0.23619	protein_coding	TRUE	HADH
chr4	ENSG00000183783	cg00220737	rs12502623	KCTD8	-0.107825	0.0199796	6.78584e-08	0.654301	protein_coding	TRUE	KCTD8
chr4	ENSG00000231782	cg25808878	rs7356293	LINC00575	-0.0825801	0.0121781	1.19294e-11	0.12922	lncRNA	TRUE	LINC00575
chr4	ENSG00000231782	cg18583557	rs7356293	LINC00575	-0.0632266	0.0107059	3.51041e-09	0.523768	lncRNA	TRUE	LINC00575
chr4	ENSG00000251580	cg04672903	rs7662433	LINC02482	-0.663481	0.122304	5.79974e-08	0.0567404	lncRNA	TRUE	RP11-539L10.3
chr4	ENSG00000251580	cg13943980	rs7662433	LINC02482	-0.275946	0.0511328	6.78962e-08	0.357807	lncRNA	TRUE	RP11-539L10.3
chr4	ENSG00000090316	cg08948841	rs11721372	MAEA	0.22115	0.0358797	7.10858e-10	0.20142	protein_coding	TRUE	MAEA
chr4	ENSG00000090316	cg25897951	rs11721372	MAEA	0.179441	0.0310548	7.55017e-09	0.434652	protein_coding	TRUE	MAEA
chr4	ENSG00000090316	cg26479374	rs11721372	MAEA	0.191722	0.0337195	1.30197e-08	0.223215	protein_coding	TRUE	MAEA
chr4	ENSG00000090316	cg10932140	rs11721372	MAEA	0.114531	0.0216882	1.28619e-07	0.353598	protein_coding	TRUE	MAEA
chr4	ENSG00000090316	cg09748973	rs11721372	MAEA	-0.117519	0.0233258	4.70039e-07	0.22698	protein_coding	TRUE	MAEA
chr4	ENSG00000090316	cg04122972	rs11721372	MAEA	0.137532	0.0274959	5.6767e-07	0.171432	protein_coding	TRUE	MAEA
chr4	ENSG00000090316	cg04703765	rs11721372	MAEA	0.0916191	0.0184259	6.61669e-07	0.292404	protein_coding	TRUE	MAEA
chr4	ENSG00000090316	cg15586393	rs11721372	MAEA	0.131267	0.0265911	7.95294e-07	0.564849	protein_coding	TRUE	MAEA
chr4	ENSG00000173376	cg25550573	rs2390072	NDNF	-0.0426782	0.00510675	6.42196e-17	0.870302	protein_coding	TRUE	NDNF
chr4	ENSG00000173376	cg18728025	rs2390072	NDNF	-0.0395645	0.004824	2.372e-16	0.953134	protein_coding	TRUE	NDNF
chr4	ENSG00000173376	cg10832655	rs2390072	NDNF	-0.0282348	0.00352824	1.21894e-15	0.950598	protein_coding	TRUE	NDNF
chr4	ENSG00000173376	cg18670770	rs2390072	NDNF	-0.0226918	0.00287334	2.84856e-15	0.916079	protein_coding	TRUE	NDNF
chr4	ENSG00000173376	cg02210466	rs2390072	NDNF	-0.0274342	0.00380751	5.79244e-13	0.944037	protein_coding	TRUE	NDNF
chr4	ENSG00000173376	cg05640431	rs2390072	NDNF	0.0161132	0.00225761	9.51825e-13	0.87257	protein_coding	TRUE	NDNF
chr4	ENSG00000173376	cg03509106	rs2390072	NDNF	-0.0167979	0.00250881	2.14862e-11	0.777983	protein_coding	TRUE	NDNF
chr4	ENSG00000173376	cg00957698	rs2390072	NDNF	-0.0149211	0.00287378	2.07856e-07	0.969239	protein_coding	TRUE	NDNF
chr4	ENSG00000163293	cg26178657	rs76552755	NIPAL1	-0.188145	0.0221918	2.28817e-17	0.349545	protein_coding	TRUE	NIPAL1
chr4	ENSG00000250317	cg18478667	rs2305670	SMIM20	-0.0780636	0.0151383	2.51346e-07	0.114418	protein_coding	TRUE	SMIM20
chr4	ENSG00000109762	cg01881046	rs3108243	SNX25	-0.0731889	0.00586806	1.05572e-35	0.96445	protein_coding	TRUE	SNX25
chr4	ENSG00000109762	cg08240002	rs3108243	SNX25	-0.0865394	0.00698255	2.82839e-35	0.849183	protein_coding	TRUE	SNX25
chr4	ENSG00000109762	cg12836958	rs3108243	SNX25	-0.0441431	0.00400295	2.81143e-28	0.962928	protein_coding	TRUE	SNX25
chr4	ENSG00000109762	cg21907850	rs3108243	SNX25	-0.030187	0.0028601	4.84029e-26	0.875048	protein_coding	TRUE	SNX25
chr4	ENSG00000109762	cg15478081	rs3108243	SNX25	-0.0220021	0.00278391	2.71634e-15	0.63234	protein_coding	TRUE	SNX25
chr4	ENSG00000109762	cg17998594	rs3108243	SNX25	-0.0225128	0.00305456	1.70357e-13	0.782206	protein_coding	TRUE	SNX25
chr4	ENSG00000109762	cg02207086	rs3108243	SNX25	-0.0204963	0.00357566	9.91449e-09	0.113397	protein_coding	TRUE	SNX25
chr4	ENSG00000173011	cg06697600	rs9986037	TADA2B	0.0785842	0.0111742	2.02681e-12	0.599409	protein_coding	TRUE	TADA2B
chr4	ENSG00000173011	cg02503808	rs9986037	TADA2B	-0.079217	0.0114468	4.50166e-12	0.36658	protein_coding	TRUE	TADA2B
chr4	ENSG00000173011	cg26116260	rs9986037	TADA2B	-0.051897	0.00751648	5.0404e-12	0.651435	protein_coding	TRUE	TADA2B
chr4	ENSG00000173011	cg19539972	rs9986037	TADA2B	-0.0523301	0.00822332	1.97047e-10	0.353757	protein_coding	TRUE	TADA2B
chr4	ENSG00000173011	cg23757056	rs9986037	TADA2B	-0.0900281	0.0173691	2.18062e-07	0.63002	protein_coding	TRUE	TADA2B
chr4	ENSG00000173011	cg17480221	rs9986037	TADA2B	-0.0486878	0.00951133	3.07276e-07	0.602578	protein_coding	TRUE	TADA2B
chr4	ENSG00000173011	cg24709285	rs9986037	TADA2B	-0.0387106	0.00784148	7.94785e-07	0.173623	protein_coding	TRUE	TADA2B
chr4	ENSG00000169762	cg20488107	rs12506478	TAPT1	-0.0106682	0.00162038	4.58588e-11	0.162793	protein_coding	TRUE	TAPT1
chr4	ENSG00000169762	cg00052976	rs12506478	TAPT1	-0.00783399	0.00126361	5.65653e-10	0.458146	protein_coding	TRUE	TAPT1
chr4	ENSG00000169762	cg10296425	rs1373112	TAPT1	-0.00614913	0.00104852	4.50269e-09	0.872209	protein_coding	TRUE	TAPT1
chr4	ENSG00000169762	cg16327276	rs1373112	TAPT1	-0.0052201	0.00104616	6.04453e-07	0.32973	protein_coding	TRUE	TAPT1
chr4	ENSG00000180346	cg11804293	rs17015027	TIGD2	-0.621898	0.114976	6.34091e-08	0.171999	protein_coding	TRUE	TIGD2
chr4	ENSG00000109775	cg13030586	rs34235464	UFSP2	0.0125374	0.00217362	8.02265e-09	0.219242	protein_coding	TRUE	UFSP2
chr4	ENSG00000109775	cg06277849	rs4862524	UFSP2	0.0228799	0.00454326	4.75366e-07	0.892892	protein_coding	TRUE	UFSP2
chr4	ENSG00000182168	cg12468008	rs1385668	UNC5C	-0.0954275	0.0161092	3.14614e-09	0.371985	protein_coding	TRUE	UNC5C
chr4	ENSG00000182168	cg13467274	rs1385668	UNC5C	-0.0806197	0.0152077	1.15022e-07	0.664357	protein_coding	TRUE	UNC5C
chr4	ENSG00000182168	cg24386507	rs1385668	UNC5C	-0.0557628	0.0110709	4.73225e-07	0.60781	protein_coding	TRUE	UNC5C
chr5	ENSG00000173210	cg27543327	rs70973510	ABLIM3	-0.0405566	0.00671983	1.58608e-09	0.307971	protein_coding	TRUE	ABLIM3
chr5	ENSG00000173210	cg23518039	rs70973510	ABLIM3	-0.0250087	0.00481874	2.10426e-07	0.244758	protein_coding	TRUE	ABLIM3
chr5	ENSG00000173210	cg06539116	rs70973510	ABLIM3	0.0123086	0.00242833	4.00476e-07	0.365866	protein_coding	TRUE	ABLIM3
chr5	ENSG00000253406	cg27543327	rs748066	AC012613.2	0.11099	0.0114562	3.3858e-22	0.127009	lncRNA	TRUE	AC012613.2
chr5	ENSG00000253406	cg23518039	rs748066	AC012613.2	0.0732528	0.00952191	1.43637e-14	0.941884	lncRNA	TRUE	AC012613.2
chr5	ENSG00000253406	cg06539116	rs748066	AC012613.2	-0.035291	0.00489769	5.77704e-13	0.783866	lncRNA	TRUE	AC012613.2
chr5	ENSG00000253406	cg11649167	rs748066	AC012613.2	0.0381361	0.0072215	1.28539e-07	0.230897	lncRNA	TRUE	AC012613.2
chr5	ENSG00000253406	cg17593055	rs748066	AC012613.2	0.0276345	0.00558845	7.61666e-07	0.866052	lncRNA	TRUE	AC012613.2
chr5	ENSG00000154122	cg11792786	rs2934813	ANKH	-0.0609529	0.00765724	1.71813e-15	0.648764	protein_coding	TRUE	ANKH
chr5	ENSG00000154122	cg27316798	rs2934813	ANKH	-0.029866	0.00390676	2.09448e-14	0.381437	protein_coding	TRUE	ANKH
chr5	ENSG00000154122	cg15325397	rs2934813	ANKH	-0.0206474	0.00394938	1.7133e-07	0.806764	protein_coding	TRUE	ANKH
chr5	ENSG00000197043	cg10610249	rs10039049	ANXA6	-0.0124732	0.00188287	3.48201e-11	0.447826	protein_coding	TRUE	ANXA6
chr5	ENSG00000197043	cg18060909	rs10039049	ANXA6	-0.0168792	0.00258432	6.51671e-11	0.826658	protein_coding	TRUE	ANXA6
chr5	ENSG00000197043	cg25408093	rs10039049	ANXA6	-0.0102179	0.00167377	1.02988e-09	0.932936	protein_coding	TRUE	ANXA6
chr5	ENSG00000197043	cg15931138	rs10039049	ANXA6	-0.0100967	0.00189017	9.20848e-08	0.245862	protein_coding	TRUE	ANXA6
chr5	ENSG00000129596	cg21377673	rs34869	CDO1	-0.149232	0.0253426	3.89546e-09	0.304713	protein_coding	TRUE	CDO1
chr5	ENSG00000129596	cg07644368	rs34869	CDO1	-0.168518	0.03108	5.89097e-08	0.343336	protein_coding	TRUE	CDO1
chr5	ENSG00000180104	cg24250168	rs72717432	EXOC3	-0.0554063	0.0101416	4.67424e-08	0.782863	protein_coding	TRUE	EXOC3
chr5	ENSG00000164404	cg00344527	rs30179	GDF9	0.362195	0.060161	1.73965e-09	0.979256	protein_coding	TRUE	GDF9
chr5	ENSG00000164404	cg12532266	rs30179	GDF9	-0.515677	0.0953262	6.31649e-08	0.967325	protein_coding	TRUE	GDF9
chr5	ENSG00000164404	cg17317391	rs30179	GDF9	-0.396929	0.0772714	2.79436e-07	0.996476	protein_coding	TRUE	GDF9
chr5	ENSG00000171421	cg01294811	rs5865385	MRPL36	0.881295	0.164188	7.9788e-08	0.746956	protein_coding	TRUE	MRPL36
chr5	ENSG00000112981	cg17020052	rs17637720	NME5	0.123004	0.0231832	1.12226e-07	0.102673	protein_coding	TRUE	NME5
chr5	ENSG00000168938	cg19412675	rs28373879	PPIC	-0.0920324	0.0141638	8.15568e-11	0.892053	protein_coding	TRUE	PPIC
chr5	ENSG00000168938	cg05389183	rs28373879	PPIC	-0.207938	0.0352508	3.66115e-09	0.87982	protein_coding	TRUE	PPIC
chr5	ENSG00000168938	cg12791433	rs28373879	PPIC	-0.159288	0.0283927	2.02137e-08	0.761167	protein_coding	TRUE	PPIC
chr5	ENSG00000164292	cg23522475	rs42862	RHOBTB3	-0.00852745	0.00144269	3.40446e-09	0.996074	protein_coding	TRUE	RHOBTB3
chr5	ENSG00000164292	cg01389287	rs42862	RHOBTB3	-0.00689923	0.00125991	4.35143e-08	0.962817	protein_coding	TRUE	RHOBTB3
chr5	ENSG00000164292	cg16319118	rs42862	RHOBTB3	-0.00990793	0.00187631	1.28803e-07	0.636176	protein_coding	TRUE	RHOBTB3
chr5	ENSG00000164327	cg05015628	rs13184911	RICTOR	-0.0113532	0.00152245	8.83669e-14	0.141896	protein_coding	TRUE	RICTOR
chr5	ENSG00000164327	cg04869206	rs13184911	RICTOR	0.00824459	0.00134841	9.69886e-10	0.936545	protein_coding	TRUE	RICTOR
chr5	ENSG00000164327	cg24571930	rs13184911	RICTOR	-0.00807419	0.00143842	1.98595e-08	0.127503	protein_coding	TRUE	RICTOR
chr5	ENSG00000155542	cg24531977	rs185220	SETD9	-0.707392	0.0587386	2.10961e-33	0.303045	protein_coding	TRUE	SETD9
chr5	ENSG00000155542	cg12311346	rs185220	SETD9	-0.442414	0.0390985	1.10122e-29	0.219489	protein_coding	TRUE	SETD9
chr5	ENSG00000155542	cg12654349	rs185220	SETD9	-0.847822	0.087277	2.62441e-22	0.201208	protein_coding	TRUE	SETD9
chr5	ENSG00000155542	cg08400814	rs185220	SETD9	-0.281089	0.0368669	2.45126e-14	0.59669	protein_coding	TRUE	SETD9
chr5	ENSG00000155542	cg06795995	rs185220	SETD9	-0.237661	0.0403137	3.7401e-09	0.321903	protein_coding	TRUE	SETD9
chr5	ENSG00000197375	cg13373085	rs274557	SLC22A5	-0.159788	0.0245139	7.11255e-11	0.145641	protein_coding	TRUE	SLC22A5
chr5	ENSG00000197375	cg12495687	rs274557	SLC22A5	-0.08269	0.0128258	1.13976e-10	0.541338	protein_coding	TRUE	SLC22A5
chr5	ENSG00000197375	cg24028361	rs274557	SLC22A5	-0.10567	0.0173186	1.05063e-09	0.193781	protein_coding	TRUE	SLC22A5
chr5	ENSG00000197375	cg05231888	rs274557	SLC22A5	-0.0546284	0.00955848	1.09591e-08	0.772587	protein_coding	TRUE	SLC22A5
chr5	ENSG00000197375	cg23475112	rs274557	SLC22A5	-0.152589	0.0274289	2.65064e-08	0.136046	protein_coding	TRUE	SLC22A5
chr5	ENSG00000197375	cg18848531	rs274557	SLC22A5	-0.0463528	0.00892362	2.05386e-07	0.493845	protein_coding	TRUE	SLC22A5
chr5	ENSG00000113645	cg08537845	rs10866628	WWC1	-0.0358751	0.0039965	2.79202e-19	0.897581	protein_coding	TRUE	WWC1
chr5	ENSG00000113645	cg08568649	rs10866628	WWC1	-0.0313102	0.00355473	1.27351e-18	0.0646384	protein_coding	TRUE	WWC1
chr5	ENSG00000113645	cg08765317	rs10866628	WWC1	-0.0369585	0.00420013	1.37577e-18	0.685755	protein_coding	TRUE	WWC1
chr5	ENSG00000113645	cg15232798	rs10866628	WWC1	-0.0346919	0.00418424	1.12219e-16	0.1226	protein_coding	TRUE	WWC1
chr5	ENSG00000113645	cg19394562	rs10866628	WWC1	-0.0294199	0.00363943	6.28533e-16	0.515327	protein_coding	TRUE	WWC1
chr5	ENSG00000113645	cg01789980	rs10866628	WWC1	-0.0162818	0.00215454	4.12499e-14	0.346579	protein_coding	TRUE	WWC1
chr5	ENSG00000113645	cg07195319	rs10866628	WWC1	-0.0153065	0.00248515	7.31164e-10	0.880021	protein_coding	TRUE	WWC1
chr5	ENSG00000113645	cg15470457	rs10866628	WWC1	0.0123035	0.00213131	7.79835e-09	0.912129	protein_coding	TRUE	WWC1
chr5	ENSG00000113645	cg06702643	rs10866628	WWC1	-0.0116225	0.00205271	1.4958e-08	0.205316	protein_coding	TRUE	WWC1
chr5	ENSG00000113645	cg07915631	rs10866628	WWC1	-0.0116934	0.00232008	4.65259e-07	0.110398	protein_coding	TRUE	WWC1
chr6	ENSG00000112763	cg03039335	rs2273193	BTN2A1	-0.323746	0.0645796	5.35516e-07	0.175272	protein_coding	TRUE	BTN2A1
chr6	ENSG00000112763	cg15676542	rs2273193	BTN2A1	-0.150509	0.0306599	9.15554e-07	0.0909248	protein_coding	TRUE	BTN2A1
chr6	ENSG00000188107	cg23176759	rs2812772	EYS	-0.00936726	0.00140403	2.52838e-11	0.314545	protein_coding	TRUE	EYS
chr6	ENSG00000112218	cg18709325	rs150998871	GPR63	-0.570269	0.0975041	4.95543e-09	0.728517	protein_coding	TRUE	GPR63
chr6	ENSG00000112218	cg10979063	rs150998871	GPR63	0.67187	0.115255	5.56149e-09	0.228393	protein_coding	TRUE	GPR63
chr6	ENSG00000111906	cg25680145	rs73581685	HDDC2	-0.055891	0.0101385	3.533e-08	0.207703	protein_coding	TRUE	HDDC2
chr6	ENSG00000051620	cg03863486	rs11441776	HEBP2	-0.064323	0.00628668	1.43081e-24	0.229216	protein_coding	TRUE	HEBP2
chr6	ENSG00000051620	cg02939918	rs11441776	HEBP2	-0.0486619	0.00610954	1.65354e-15	0.714097	protein_coding	TRUE	HEBP2
chr6	ENSG00000051620	cg21619059	rs11441776	HEBP2	-0.13741	0.0189067	3.65438e-13	0.661028	protein_coding	TRUE	HEBP2
chr6	ENSG00000051620	cg17171485	rs11441776	HEBP2	-0.0220034	0.00337092	6.69097e-11	0.0684932	protein_coding	TRUE	HEBP2
chr6	ENSG00000051620	cg21016503	rs11441776	HEBP2	-0.0574235	0.00885334	8.80925e-11	0.415383	protein_coding	TRUE	HEBP2
chr6	ENSG00000051620	cg17388039	rs11441776	HEBP2	-0.0315873	0.00589756	8.50908e-08	0.743824	protein_coding	TRUE	HEBP2
chr6	ENSG00000214113	cg26165608	rs2773322	LYRM4	-0.0894508	0.0179963	6.67792e-07	0.492701	protein_coding	TRUE	LYRM4
chr6	ENSG00000112110	cg25282410	rs58504486	MRPL18	-0.347685	0.0537737	1.00831e-10	0.584421	protein_coding	TRUE	MRPL18
chr6	ENSG00000112110	cg11366901	rs58504486	MRPL18	-0.208031	0.0336423	6.26581e-10	0.0823654	protein_coding	TRUE	MRPL18
chr6	ENSG00000112110	cg19482086	rs58504486	MRPL18	-0.170158	0.0297796	1.10421e-08	0.369894	protein_coding	TRUE	MRPL18
chr6	ENSG00000135297	cg17626203	rs11315438	MTO1	0.185364	0.0285009	7.83218e-11	0.801122	protein_coding	TRUE	MTO1
chr6	ENSG00000135297	cg11561443	rs11315438	MTO1	0.170947	0.0312511	4.49748e-08	0.5229	protein_coding	TRUE	MTO1
chr6	ENSG00000135297	cg13435101	rs11315438	MTO1	0.134976	0.0258367	1.74906e-07	0.638409	protein_coding	TRUE	MTO1
chr6	ENSG00000224846	cg09234670	rs9378351	NQO2-AS1	-0.300862	0.0523816	9.26548e-09	0.14881	lncRNA	TRUE	RP1-90J20.8
chr6	ENSG00000124587	cg02353165	rs9462859	PEX6	0.167002	0.0159985	1.65238e-25	0.41924	protein_coding	TRUE	PEX6
chr6	ENSG00000124587	cg16590910	rs9462859	PEX6	0.116104	0.0119036	1.77893e-22	0.736795	protein_coding	TRUE	PEX6
chr6	ENSG00000124587	cg13397359	rs9462859	PEX6	0.1798	0.0187	6.91251e-22	0.763822	protein_coding	TRUE	PEX6
chr6	ENSG00000124587	cg17048368	rs9462859	PEX6	0.0734049	0.00767123	1.081e-21	0.531481	protein_coding	TRUE	PEX6
chr6	ENSG00000124587	cg24101359	rs9462859	PEX6	0.078789	0.00838243	5.49265e-21	0.475959	protein_coding	TRUE	PEX6
chr6	ENSG00000124587	cg05552183	rs9462859	PEX6	0.0868035	0.0112652	1.30363e-14	0.245297	protein_coding	TRUE	PEX6
chr6	ENSG00000124587	cg24751129	rs9462859	PEX6	0.0500125	0.00653484	1.96012e-14	0.293596	protein_coding	TRUE	PEX6
chr6	ENSG00000124587	cg21280719	rs9462859	PEX6	-0.0971901	0.0140191	4.12853e-12	0.252345	protein_coding	TRUE	PEX6
chr6	ENSG00000124587	cg10056627	rs9462859	PEX6	0.0453542	0.00681429	2.81878e-11	0.747179	protein_coding	TRUE	PEX6
chr6	ENSG00000124587	cg14338887	rs9462859	PEX6	0.0526543	0.00937677	1.96105e-08	0.906556	protein_coding	TRUE	PEX6
chr6	ENSG00000180822	cg01356548	rs6596960	PSMG4	0.328499	0.0466099	1.81728e-12	0.14918	protein_coding	TRUE	PSMG4
chr6	ENSG00000180822	cg00715124	rs6596960	PSMG4	0.235156	0.0356963	4.46721e-11	0.362444	protein_coding	TRUE	PSMG4
chr6	ENSG00000180822	cg23645885	rs6596960	PSMG4	0.292426	0.0445457	5.21635e-11	0.112755	protein_coding	TRUE	PSMG4
chr6	ENSG00000180822	cg17619020	rs6596960	PSMG4	0.213498	0.0359913	2.99397e-09	0.151983	protein_coding	TRUE	PSMG4
chr6	ENSG00000180822	cg00118071	rs6596960	PSMG4	0.21609	0.0386096	2.18363e-08	0.390009	protein_coding	TRUE	PSMG4
chr6	ENSG00000180822	cg06292958	rs6596960	PSMG4	0.174718	0.0334737	1.79344e-07	0.589056	protein_coding	TRUE	PSMG4
chr6	ENSG00000124570	cg17104905	rs7751512	SERPINB6	-0.0374482	0.00547445	7.89002e-12	0.963096	protein_coding	TRUE	SERPINB6
chr6	ENSG00000124523	cg02206980	rs112443954	SIRT5	0.247882	0.0315793	4.17706e-15	0.39678	protein_coding	TRUE	SIRT5
chr6	ENSG00000124523	cg01064902	rs112443954	SIRT5	-0.1735	0.0227148	2.20328e-14	0.88632	protein_coding	TRUE	SIRT5
chr6	ENSG00000124523	cg07534331	rs112443954	SIRT5	-0.152153	0.0227893	2.44687e-11	0.66952	protein_coding	TRUE	SIRT5
chr6	ENSG00000028839	cg17040800	rs3777894	TBPL1	-0.389441	0.0786833	7.44147e-07	0.677988	protein_coding	TRUE	TBPL1
chr6	ENSG00000146221	cg00775197	rs35006839	TCTE1	0.847289	0.161931	1.67329e-07	0.0529444	protein_coding	TRUE	TCTE1
chr6	ENSG00000187189	cg06526681	rs1204833	TSPYL4	-0.0413341	0.00810981	3.45449e-07	0.679798	protein_coding	TRUE	TSPYL4
chr6	ENSG00000130338	cg23877497	rs262820	TULP4	-0.0491728	0.00790566	4.97329e-10	0.242537	protein_coding	TRUE	TULP4
chr6	ENSG00000137288	cg16066008	rs10672	UQCC2	-0.0291108	0.00409228	1.13074e-12	0.325094	protein_coding	TRUE	UQCC2
chr6	ENSG00000137288	cg15251311	rs10672	UQCC2	-0.0169853	0.00277561	9.3889e-10	0.114112	protein_coding	TRUE	UQCC2
chr6	ENSG00000137288	cg16137773	rs10672	UQCC2	-0.0194455	0.00323138	1.76926e-09	0.115575	protein_coding	TRUE	UQCC2
chr6	ENSG00000137288	cg00310728	rs10672	UQCC2	-0.0157612	0.00298334	1.27038e-07	0.0545735	protein_coding	TRUE	UQCC2
chr6	ENSG00000137288	cg11545871	rs10672	UQCC2	-0.0175989	0.00338125	1.94152e-07	0.667117	protein_coding	TRUE	UQCC2
chr6	ENSG00000137288	cg10714061	rs10672	UQCC2	-0.0129583	0.00257262	4.72839e-07	0.219018	protein_coding	TRUE	UQCC2
chr6	ENSG00000137288	cg15808668	rs10672	UQCC2	-0.0193193	0.00385536	5.41386e-07	0.0776684	protein_coding	TRUE	UQCC2
chr6	ENSG00000137288	cg18836576	rs2229643	UQCC2	-0.0356598	0.00718138	6.84909e-07	0.470135	protein_coding	TRUE	UQCC2
chr6	ENSG00000184465	cg16249340	rs4716371	WDR27	0.227818	0.0318487	8.48166e-13	0.477347	protein_coding	TRUE	WDR27
chr6	ENSG00000184465	cg15038512	rs4716371	WDR27	-0.132519	0.0256269	2.32704e-07	0.342807	protein_coding	TRUE	WDR27
chr7	ENSG00000241764	cg16793755	rs3735606	AC002467.1	1.19317	0.235331	3.97446e-07	0.89385	lncRNA	TRUE	AC002467.7
chr7	ENSG00000241764	cg16716866	rs3735606	AC002467.1	-1.12638	0.223161	4.47852e-07	0.892521	lncRNA	TRUE	AC002467.7
chr7	ENSG00000136261	cg03804248	rs706029	BZW2	-0.0389369	0.00743139	1.60999e-07	0.304903	protein_coding	TRUE	BZW2
chr7	ENSG00000136261	cg25483749	rs706029	BZW2	-0.0225956	0.00436971	2.32901e-07	0.49994	protein_coding	TRUE	BZW2
chr7	ENSG00000106069	cg00615485	rs3828979	CHN2	-0.0500598	0.00706431	1.37742e-12	0.251908	protein_coding	TRUE	CHN2
chr7	ENSG00000106069	cg03100044	rs3828979	CHN2	-0.0379512	0.00542308	2.59468e-12	0.143727	protein_coding	TRUE	CHN2
chr7	ENSG00000106069	cg16920620	rs3828979	CHN2	-0.0422485	0.00606018	3.13584e-12	0.153635	protein_coding	TRUE	CHN2
chr7	ENSG00000106069	cg21251563	rs3828979	CHN2	-0.0388594	0.00563875	5.52111e-12	0.210399	protein_coding	TRUE	CHN2
chr7	ENSG00000106069	cg03287046	rs3828979	CHN2	-0.0239807	0.0037843	2.34445e-10	0.246209	protein_coding	TRUE	CHN2
chr7	ENSG00000106078	cg21232935	rs12719037	COBL	-0.0334165	0.0064258	1.98896e-07	0.636812	protein_coding	TRUE	COBL
chr7	ENSG00000126870	cg01302119	rs842694	DYNC2I1	-0.0180569	0.00345942	1.79269e-07	0.391897	protein_coding	TRUE	WDR60
chr7	ENSG00000106348	cg11742189	rs144398561	IMPDH1	-0.0221346	0.00390648	1.46071e-08	0.725783	protein_coding	TRUE	IMPDH1
chr7	ENSG00000122778	cg12483292	rs540649	KIAA1549	0.130728	0.0241886	6.49846e-08	0.368004	protein_coding	TRUE	KIAA1549
chr7	ENSG00000161036	cg09648233	rs3800988	LRWD1	-0.0772636	0.0104306	1.28798e-13	0.197584	protein_coding	TRUE	LRWD1
chr7	ENSG00000154678	cg27532318	rs10241729	PDE1C	0.0566046	0.011471	8.03303e-07	0.0892382	protein_coding	TRUE	PDE1C
chr7	ENSG00000127948	cg14016166	rs72553971	POR	-0.251868	0.0458215	3.86899e-08	0.830853	protein_coding	TRUE	POR
chr7	ENSG00000157214	cg02206373	rs722245	STEAP2	-0.0449094	0.0080299	2.23473e-08	0.981164	protein_coding	TRUE	STEAP2
chr7	ENSG00000157214	cg09450020	rs722245	STEAP2	-0.0498118	0.00891363	2.29334e-08	0.670517	protein_coding	TRUE	STEAP2
chr7	ENSG00000157214	cg21700332	rs722245	STEAP2	-0.122627	0.0232732	1.3717e-07	0.888078	protein_coding	TRUE	STEAP2
chr7	ENSG00000157214	cg23697855	rs194505	STEAP2	0.101992	0.0193953	1.45183e-07	0.287701	protein_coding	TRUE	STEAP2
chr7	ENSG00000157214	cg27367526	rs722245	STEAP2	-0.034908	0.0067196	2.04781e-07	0.990152	protein_coding	TRUE	STEAP2
chr7	ENSG00000211695	cg22433758	rs2534568	TRGV9	-0.633028	0.120678	1.55791e-07	0.151455	TR_V_gene	TRUE	TRGV9
chr7	ENSG00000211695	cg18833928	rs2534568	TRGV9	-0.847671	0.163757	2.26198e-07	0.645727	TR_V_gene	TRUE	TRGV9
chr8	ENSG00000255020	cg21775007	rs11991153	AF131216.3	-0.26287	0.0275282	1.3083e-21	0.218111	lncRNA	TRUE	AF131216.5
chr8	ENSG00000255020	cg19747960	rs11991153	AF131216.3	0.0640772	0.00842865	2.90911e-14	0.0738623	lncRNA	TRUE	AF131216.5
chr8	ENSG00000255020	cg02601489	rs11991153	AF131216.3	-0.0830576	0.0114195	3.5078e-13	0.221425	lncRNA	TRUE	AF131216.5
chr8	ENSG00000255020	cg14715413	rs11991153	AF131216.3	0.0371683	0.00604158	7.64768e-10	0.0836391	lncRNA	TRUE	AF131216.5
chr8	ENSG00000255020	cg21289689	rs11991153	AF131216.3	-0.0670201	0.0110048	1.12845e-09	0.20928	lncRNA	TRUE	AF131216.5
chr8	ENSG00000255020	cg23134331	rs11991153	AF131216.3	-0.0367195	0.00693162	1.17471e-07	0.0759332	lncRNA	TRUE	AF131216.5
chr8	ENSG00000255020	cg13236298	rs11991153	AF131216.3	-0.0317192	0.00633187	5.45857e-07	0.0672097	lncRNA	TRUE	AF131216.5
chr8	ENSG00000156162	cg14120647	rs36005749	DPY19L4	-0.105159	0.0170941	7.66314e-10	0.77824	protein_coding	TRUE	DPY19L4
chr8	ENSG00000147677	cg17256555	rs11775890	EIF3H	0.0813115	0.0148538	4.39723e-08	0.420982	protein_coding	TRUE	EIF3H
chr8	ENSG00000147677	cg23513447	rs11775890	EIF3H	0.0331159	0.00611889	6.23005e-08	0.0533712	protein_coding	TRUE	EIF3H
chr8	ENSG00000132561	cg05234651	rs2331806	MATN2	-0.0144241	0.00201626	8.43326e-13	0.274947	protein_coding	TRUE	MATN2
chr8	ENSG00000132561	cg16202564	rs2331806	MATN2	-0.0173968	0.0025624	1.127e-11	0.231161	protein_coding	TRUE	MATN2
chr8	ENSG00000132561	cg00990769	rs2331806	MATN2	-0.0118255	0.00182082	8.32437e-11	0.994529	protein_coding	TRUE	MATN2
chr8	ENSG00000132561	cg11515222	rs2331806	MATN2	-0.0111056	0.00181565	9.55943e-10	0.38121	protein_coding	TRUE	MATN2
chr8	ENSG00000132561	cg10447222	rs2331806	MATN2	-0.00664156	0.00126942	1.67705e-07	0.935119	protein_coding	TRUE	MATN2
chr8	ENSG00000154328	cg09768257	rs2686211	NEIL2	-0.0938742	0.0127374	1.70653e-13	0.589988	protein_coding	TRUE	NEIL2
chr8	ENSG00000154328	cg11647077	rs2686211	NEIL2	-0.0480791	0.00805543	2.39388e-09	0.406133	protein_coding	TRUE	NEIL2
chr8	ENSG00000178685	cg07980830	rs11136345	PARP10	-0.241834	0.0466368	2.15472e-07	0.540973	protein_coding	TRUE	PARP10
chr8	ENSG00000178685	cg06045337	rs11136345	PARP10	-0.265837	0.05316	5.71225e-07	0.157985	protein_coding	TRUE	PARP10
chr8	ENSG00000197181	cg18135555	rs4871990	PIWIL2	-0.339652	0.0441113	1.36187e-14	0.0547355	protein_coding	TRUE	PIWIL2
chr8	ENSG00000197181	cg26039829	rs4871990	PIWIL2	-0.43005	0.0561798	1.93485e-14	0.0814515	protein_coding	TRUE	PIWIL2
chr8	ENSG00000197181	cg02788857	rs4871990	PIWIL2	-0.345638	0.0465201	1.08719e-13	0.297769	protein_coding	TRUE	PIWIL2
chr8	ENSG00000197181	cg09517075	rs4871990	PIWIL2	-0.326328	0.0445416	2.36482e-13	0.059666	protein_coding	TRUE	PIWIL2
chr8	ENSG00000197181	cg09397783	rs4871990	PIWIL2	-0.283968	0.0409355	4.00581e-12	0.176014	protein_coding	TRUE	PIWIL2
chr8	ENSG00000197181	cg07298985	rs4871990	PIWIL2	-0.332122	0.0499304	2.8972e-11	0.223636	protein_coding	TRUE	PIWIL2
chr8	ENSG00000197181	cg10298898	rs4871990	PIWIL2	-0.29531	0.0447817	4.26877e-11	0.289284	protein_coding	TRUE	PIWIL2
chr8	ENSG00000197181	cg14487702	rs4871990	PIWIL2	-0.231796	0.0358393	9.95434e-11	0.0959734	protein_coding	TRUE	PIWIL2
chr8	ENSG00000197181	cg21471580	rs4871990	PIWIL2	-0.249125	0.0405186	7.82584e-10	0.131583	protein_coding	TRUE	PIWIL2
chr8	ENSG00000197181	cg17304084	rs4871990	PIWIL2	-0.203015	0.0342319	3.01868e-09	0.585756	protein_coding	TRUE	PIWIL2
chr8	ENSG00000197181	cg05079448	rs4871990	PIWIL2	0.15545	0.0281076	3.19233e-08	0.356915	protein_coding	TRUE	PIWIL2
chr8	ENSG00000169398	cg08643176	rs7010459	PTK2	-0.0179467	0.00345264	2.01503e-07	0.241066	protein_coding	TRUE	PTK2
chr8	ENSG00000183638	cg26101170	rs4841407	RP1L1	-0.015483	0.00222851	3.71365e-12	0.892452	protein_coding	TRUE	RP1L1
chr8	ENSG00000183638	cg26224715	rs4841407	RP1L1	-0.0136386	0.0019958	8.279e-12	0.896295	protein_coding	TRUE	RP1L1
chr8	ENSG00000183638	cg27411982	rs4841407	RP1L1	0.00275504	0.000424001	8.15433e-11	0.777248	protein_coding	TRUE	RP1L1
chr8	ENSG00000183638	cg20213479	rs4841407	RP1L1	-0.00423119	0.000742769	1.22284e-08	0.737871	protein_coding	TRUE	RP1L1
chr8	ENSG00000183638	cg16847396	rs4841407	RP1L1	-0.00432362	0.000764908	1.58158e-08	0.831589	protein_coding	TRUE	RP1L1
chr8	ENSG00000183638	cg11902992	rs4841407	RP1L1	-0.00529383	0.000938699	1.705e-08	0.0672639	protein_coding	TRUE	RP1L1
chr8	ENSG00000183638	cg02724490	rs4841407	RP1L1	-0.00471871	0.000862116	4.41474e-08	0.495408	protein_coding	TRUE	RP1L1
chr8	ENSG00000183638	cg12177456	rs4841407	RP1L1	-0.00506213	0.000926271	4.62752e-08	0.615236	protein_coding	TRUE	RP1L1
chr8	ENSG00000183638	cg16517559	rs4841407	RP1L1	-0.00696077	0.00136551	3.4406e-07	0.259559	protein_coding	TRUE	RP1L1
chr8	ENSG00000169439	cg03276479	rs2589201	SDC2	-0.09229	0.0181159	3.49833e-07	0.968624	protein_coding	TRUE	SDC2
chr8	ENSG00000215114	cg23552192	rs13253349	UBXN2B	0.114796	0.0200988	1.11936e-08	0.242502	protein_coding	TRUE	UBXN2B
chr8	ENSG00000160948	cg00065570	rs190185812	VPS28	-0.106507	0.0209975	3.9291e-07	0.2071	protein_coding	TRUE	VPS28
chr9	ENSG00000135049	cg16088563	rs7869135	AGTPBP1	-0.00707137	0.00135488	1.79723e-07	0.0556017	protein_coding	TRUE	AGTPBP1
chr9	ENSG00000261215	cg06550082	rs913836	AL162231.4	0.922795	0.185196	6.26699e-07	0.393109	lncRNA	TRUE	RP11-195F19.30
chr9	ENSG00000226752	cg21717724	rs72298225	CUTALP	-0.207781	0.0130711	6.73759e-57	0.145635	transcribed_unitary_pseudogene	TRUE	PSMD5-AS1
chr9	ENSG00000226752	cg09419670	rs72298225	CUTALP	-0.156812	0.011066	1.39285e-45	0.11917	transcribed_unitary_pseudogene	TRUE	PSMD5-AS1
chr9	ENSG00000226752	cg03499324	rs72298225	CUTALP	-0.119968	0.00958591	6.18093e-36	0.277148	transcribed_unitary_pseudogene	TRUE	PSMD5-AS1
chr9	ENSG00000226752	cg09586646	rs72298225	CUTALP	-0.108605	0.0100741	4.25211e-27	0.0632934	transcribed_unitary_pseudogene	TRUE	PSMD5-AS1
chr9	ENSG00000226752	cg03515999	rs72298225	CUTALP	-0.0235737	0.00402794	4.84133e-09	0.173813	transcribed_unitary_pseudogene	TRUE	PSMD5-AS1
chr9	ENSG00000262075	cg14774860	rs28595751	DKFZP434A062	0.0208442	0.00332325	3.55947e-10	0.171817	lncRNA	TRUE	DKFZP434A062
chr9	ENSG00000119471	cg24992936	rs4979108	HSDL2	-0.0795333	0.0106553	8.38093e-14	0.887569	protein_coding	TRUE	HSDL2
chr9	ENSG00000119471	cg13412981	rs4979108	HSDL2	-0.094408	0.0144242	5.94566e-11	0.722742	protein_coding	TRUE	HSDL2
chr9	ENSG00000232850	cg04745703	rs884115	PTGES2-AS1	-3.56867	0.627227	1.27344e-08	0.755337	lncRNA	TRUE	PTGES2-AS1
chr9	ENSG00000106853	cg14561904	rs41279067	PTGR1	0.0626597	0.0092809	1.46353e-11	0.716969	protein_coding	TRUE	PTGR1
chr9	ENSG00000106853	cg23964386	rs41279067	PTGR1	-0.0443015	0.00883101	5.25976e-07	0.587242	protein_coding	TRUE	PTGR1
chr9	ENSG00000148339	cg05364011	rs55965570	SLC25A25	-0.0240107	0.00323531	1.15836e-13	0.272795	protein_coding	TRUE	SLC25A25
chr9	ENSG00000148339	cg11884704	rs55965570	SLC25A25	-0.0263596	0.00356519	1.42898e-13	0.228636	protein_coding	TRUE	SLC25A25
chr9	ENSG00000148339	cg14554539	rs55965570	SLC25A25	-0.0278754	0.00403748	5.05034e-12	0.117505	protein_coding	TRUE	SLC25A25
chr9	ENSG00000148339	cg04509054	rs55965570	SLC25A25	-0.0228305	0.00346466	4.41254e-11	0.0606564	protein_coding	TRUE	SLC25A25
chr9	ENSG00000148339	cg07974520	rs55965570	SLC25A25	-0.0133616	0.00214303	4.52013e-10	0.151522	protein_coding	TRUE	SLC25A25
chr9	ENSG00000136854	cg09126156	rs2287116	STXBP1	-0.00344643	0.000518557	3.00746e-11	0.986326	protein_coding	TRUE	STXBP1
chr9	ENSG00000136854	cg07023135	rs2287116	STXBP1	-0.00431304	0.000822704	1.58406e-07	0.676495	protein_coding	TRUE	STXBP1
chr9	ENSG00000136854	cg00552574	rs2287116	STXBP1	-0.00516304	0.00101166	3.33325e-07	0.986697	protein_coding	TRUE	STXBP1
chr9	ENSG00000119139	cg14172428	rs7850573	TJP2	-0.00774901	0.00116065	2.44832e-11	0.625308	protein_coding	TRUE	TJP2
chr9	ENSG00000119139	cg05074215	rs7850573	TJP2	-0.00582184	0.000889118	5.83562e-11	0.454643	protein_coding	TRUE	TJP2
chr9	ENSG00000119139	cg14282632	rs7850573	TJP2	-0.0068249	0.00106611	1.53657e-10	0.993037	protein_coding	TRUE	TJP2
chr9	ENSG00000119139	cg13920460	rs7850573	TJP2	-0.00750129	0.00117762	1.89203e-10	0.509184	protein_coding	TRUE	TJP2
chr9	ENSG00000119139	cg08006708	rs7850573	TJP2	-0.00768216	0.00121532	2.59708e-10	0.912708	protein_coding	TRUE	TJP2
chr9	ENSG00000119139	cg07414392	rs7850573	TJP2	-0.00551873	0.000919065	1.91661e-09	0.384742	protein_coding	TRUE	TJP2
chr9	ENSG00000119139	cg06607140	rs7850573	TJP2	-0.0054674	0.00096237	1.33769e-08	0.254872	protein_coding	TRUE	TJP2
chr9	ENSG00000119139	cg20477011	rs7850573	TJP2	-0.00720896	0.00132945	5.87617e-08	0.111323	protein_coding	TRUE	TJP2
chr9	ENSG00000119139	cg06097859	rs7850573	TJP2	-0.00539935	0.00105515	3.10168e-07	0.233573	protein_coding	TRUE	TJP2
chr9	ENSG00000197355	cg04582938	rs10870176	UAP1L1	-0.113495	0.0172824	5.13172e-11	0.74888	protein_coding	TRUE	UAP1L1
chr9	ENSG00000197355	cg14006318	rs10870176	UAP1L1	-0.0750992	0.0126479	2.89079e-09	0.565796	protein_coding	TRUE	UAP1L1
chr9	ENSG00000197355	cg08655016	rs10870176	UAP1L1	-0.0706736	0.0127705	3.12782e-08	0.692785	protein_coding	TRUE	UAP1L1
chr9	ENSG00000160293	cg14562812	rs2789852	VAV2	-0.111191	0.0153717	4.70828e-13	0.509248	protein_coding	TRUE	VAV2
chr9	ENSG00000160293	cg13134662	rs2789852	VAV2	-0.0934203	0.0130586	8.43187e-13	0.769811	protein_coding	TRUE	VAV2
chr9	ENSG00000160293	cg19466372	rs2789852	VAV2	-0.0989384	0.0147184	1.79117e-11	0.328756	protein_coding	TRUE	VAV2
chr9	ENSG00000160293	cg21157725	rs2789852	VAV2	-0.0564669	0.0114368	7.92149e-07	0.174383	protein_coding	TRUE	VAV2

## Sheet: E2M_SMR_SE
Chr	exposure	trait	top_snp	Gene	bxy	bxy_se	bxy_pval	heidi_pval	Biotype	HEIDI_Pvalue_Significant	Target gene based on SE
chr1	ENSG00000223649	cg04923746	rs10863899	AC105275.1	-1.63299	0.247466	4.14418e-11	0.507953	lncRNA	TRUE	RP11-359E8.3
chr1	ENSG00000223649	cg06753273	rs10863899	AC105275.1	-2.31885	0.361309	1.38136e-10	0.177084	lncRNA	TRUE	RP11-359E8.3
chr1	ENSG00000223649	cg00658007	rs10863899	AC105275.1	-2.0783	0.324953	1.59824e-10	0.122037	lncRNA	TRUE	RP11-359E8.3
chr1	ENSG00000223649	cg24484971	rs10863899	AC105275.1	-1.42488	0.236965	1.82087e-09	0.304203	lncRNA	TRUE	RP11-359E8.3
chr1	ENSG00000270035	cg25763306	rs34600274	AL359881.2	-0.894636	0.129289	4.52669e-12	0.689281	lncRNA	TRUE	RP11-338N10.2
chr1	ENSG00000116198	cg00889473	rs7522227	CEP104	-0.0447702	0.00878142	3.42747e-07	0.0745131	protein_coding	TRUE	CEP104
chr1	ENSG00000116675	cg05531421	rs942861	DNAJC6	0.0331351	0.00582905	1.31218e-08	0.0866556	protein_coding	TRUE	DNAJC6
chr1	ENSG00000037637	cg20611680	rs35225769	FBXO42	0.0426502	0.00775588	3.81764e-08	0.201862	protein_coding	TRUE	FBXO42
chr1	ENSG00000037637	cg03522107	rs35225769	FBXO42	0.0318476	0.00579737	3.94127e-08	0.496236	protein_coding	TRUE	FBXO42
chr1	ENSG00000037637	cg02987928	rs35225769	FBXO42	0.0428629	0.00782887	4.37573e-08	0.159895	protein_coding	TRUE	FBXO42
chr1	ENSG00000231768	cg10714509	rs271738	LINC01354	-0.520024	0.0850599	9.7397e-10	0.579429	lncRNA	TRUE	LINC01354
chr1	ENSG00000231768	cg05990710	rs271738	LINC01354	-0.404313	0.0683428	3.29949e-09	0.297895	lncRNA	TRUE	LINC01354
chr1	ENSG00000117115	cg27529520	rs2746482	PADI2	-0.0147697	0.00166069	5.91054e-19	0.593905	protein_coding	TRUE	PADI2
chr1	ENSG00000117115	cg06004306	rs2746482	PADI2	-0.012366	0.00145883	2.31722e-17	0.233412	protein_coding	TRUE	PADI2
chr1	ENSG00000117115	cg16835277	rs2746482	PADI2	-0.00732496	0.00101166	4.46837e-13	0.386141	protein_coding	TRUE	PADI2
chr1	ENSG00000117115	cg00597915	rs2746482	PADI2	-0.0107705	0.00149301	5.43678e-13	0.336788	protein_coding	TRUE	PADI2
chr1	ENSG00000117115	cg15590113	rs2746482	PADI2	-0.00487964	0.00074082	4.49375e-11	0.21042	protein_coding	TRUE	PADI2
chr1	ENSG00000117115	cg00569276	rs2746482	PADI2	-0.00895497	0.00139497	1.36735e-10	0.762955	protein_coding	TRUE	PADI2
chr1	ENSG00000117115	cg18879300	rs2746482	PADI2	-0.00463006	0.000801036	7.46639e-09	0.488241	protein_coding	TRUE	PADI2
chr1	ENSG00000117115	cg10233913	rs2746482	PADI2	-0.00610345	0.00118606	2.66139e-07	0.760562	protein_coding	TRUE	PADI2
chr1	ENSG00000117115	cg06900068	rs2746482	PADI2	-0.00440675	0.000874543	4.68165e-07	0.867634	protein_coding	TRUE	PADI2
chr1	ENSG00000228288	cg20677516	rs72442869	PCAT6	-0.12593	0.0176104	8.62388e-13	0.869444	lncRNA	TRUE	PCAT6
chr1	ENSG00000228288	cg24880665	rs72442869	PCAT6	-0.130538	0.0261233	5.82322e-07	0.557985	lncRNA	TRUE	PCAT6
chr1	ENSG00000142655	cg01834541	rs2506896	PEX14	-0.0977258	0.0102252	1.20863e-21	0.576668	protein_coding	TRUE	PEX14
chr1	ENSG00000142655	cg23863608	rs2506896	PEX14	-0.0592739	0.00660933	3.01388e-19	0.693452	protein_coding	TRUE	PEX14
chr1	ENSG00000142655	cg12830684	rs2506896	PEX14	-0.0999572	0.0113855	1.64448e-18	0.814565	protein_coding	TRUE	PEX14
chr1	ENSG00000142655	cg26362368	rs2506896	PEX14	-0.0958687	0.0110061	3.02569e-18	0.728882	protein_coding	TRUE	PEX14
chr1	ENSG00000142655	cg23987244	rs2506896	PEX14	-0.0867719	0.0100879	7.86114e-18	0.739785	protein_coding	TRUE	PEX14
chr1	ENSG00000142655	cg12806121	rs2506896	PEX14	-0.0734506	0.00871515	3.51847e-17	0.910918	protein_coding	TRUE	PEX14
chr1	ENSG00000142655	cg09319435	rs2506896	PEX14	-0.0461569	0.00553019	7.0404e-17	0.878593	protein_coding	TRUE	PEX14
chr1	ENSG00000142655	cg04607379	rs2506896	PEX14	-0.0656294	0.00794752	1.48327e-16	0.773863	protein_coding	TRUE	PEX14
chr1	ENSG00000142655	cg04585221	rs2506896	PEX14	-0.0784188	0.00964716	4.33946e-16	0.85032	protein_coding	TRUE	PEX14
chr1	ENSG00000142655	cg01849851	rs2506896	PEX14	-0.0944408	0.0119109	2.21017e-15	0.464528	protein_coding	TRUE	PEX14
chr1	ENSG00000142655	cg24294013	rs2506896	PEX14	-0.0754392	0.00954898	2.78379e-15	0.759664	protein_coding	TRUE	PEX14
chr1	ENSG00000142655	cg07357157	rs2506896	PEX14	-0.0384331	0.00487672	3.2496e-15	0.474389	protein_coding	TRUE	PEX14
chr1	ENSG00000142655	cg01063935	rs2506896	PEX14	-0.0671247	0.00852418	3.41776e-15	0.342464	protein_coding	TRUE	PEX14
chr1	ENSG00000142655	cg15554126	rs2506896	PEX14	-0.0476992	0.00607742	4.20751e-15	0.678788	protein_coding	TRUE	PEX14
chr1	ENSG00000142655	cg05454781	rs2506896	PEX14	-0.0423388	0.00543605	6.7802e-15	0.491094	protein_coding	TRUE	PEX14
chr1	ENSG00000142655	cg27571230	rs2506896	PEX14	0.0528832	0.00679131	6.86795e-15	0.243499	protein_coding	TRUE	PEX14
chr1	ENSG00000142655	cg23975251	rs2506896	PEX14	-0.0731324	0.00953035	1.67202e-14	0.663375	protein_coding	TRUE	PEX14
chr1	ENSG00000142655	cg12944311	rs2506896	PEX14	-0.0536202	0.00788666	1.05463e-11	0.904497	protein_coding	TRUE	PEX14
chr1	ENSG00000142655	cg27182133	rs2506896	PEX14	-0.0365801	0.00601736	1.20857e-09	0.714309	protein_coding	TRUE	PEX14
chr1	ENSG00000142655	cg23072051	rs2506896	PEX14	-0.0293882	0.00533745	3.67022e-08	0.226633	protein_coding	TRUE	PEX14
chr1	ENSG00000142655	cg07555102	rs2506896	PEX14	-0.0271189	0.00494921	4.26706e-08	0.287478	protein_coding	TRUE	PEX14
chr1	ENSG00000142655	cg21931713	rs2506896	PEX14	-0.0232426	0.00436457	1.008e-07	0.822473	protein_coding	TRUE	PEX14
chr1	ENSG00000142655	cg16057915	rs2506896	PEX14	-0.0510103	0.0102541	6.5373e-07	0.285249	protein_coding	TRUE	PEX14
chr1	ENSG00000081277	cg19764279	rs57522319	PKP1	-0.0235495	0.00372677	2.63255e-10	0.310785	protein_coding	TRUE	PKP1
chr1	ENSG00000081277	cg07189167	rs56287879	PKP1	-0.00878547	0.00143642	9.58216e-10	0.743488	protein_coding	TRUE	PKP1
chr1	ENSG00000081277	cg07302580	rs57522319	PKP1	-0.00709422	0.00125195	1.45706e-08	0.618971	protein_coding	TRUE	PKP1
chr1	ENSG00000081277	cg26066583	rs56287879	PKP1	-0.00657768	0.00119842	4.05077e-08	0.646278	protein_coding	TRUE	PKP1
chr1	ENSG00000081277	cg02855983	rs56287879	PKP1	-0.00531133	0.000986726	7.33429e-08	0.954734	protein_coding	TRUE	PKP1
chr1	ENSG00000081277	cg16819028	rs56287879	PKP1	-0.00785674	0.0014981	1.56734e-07	0.218186	protein_coding	TRUE	PKP1
chr1	ENSG00000081277	cg12611449	rs56287879	PKP1	-0.00528625	0.00103308	3.10476e-07	0.956296	protein_coding	TRUE	PKP1
chr1	ENSG00000081277	cg04904030	rs56287879	PKP1	-0.00366354	0.000731434	5.47942e-07	0.929216	protein_coding	TRUE	PKP1
chr1	ENSG00000081277	cg05184311	rs56287879	PKP1	-0.0037542	0.000751541	5.87338e-07	0.447739	protein_coding	TRUE	PKP1
chr1	ENSG00000189266	cg04021497	rs55899369	PNRC2	-0.0645573	0.00913296	1.5649e-12	0.760489	protein_coding	TRUE	PNRC2
chr1	ENSG00000189266	cg27409662	rs55899369	PNRC2	-0.0459692	0.00658175	2.86182e-12	0.621042	protein_coding	TRUE	PNRC2
chr1	ENSG00000189266	cg22358066	rs55899369	PNRC2	-0.0281677	0.00424457	3.21939e-11	0.690403	protein_coding	TRUE	PNRC2
chr1	ENSG00000189266	cg16924704	rs55899369	PNRC2	-0.0454101	0.00693179	5.7156e-11	0.932037	protein_coding	TRUE	PNRC2
chr1	ENSG00000189266	cg03384426	rs55899369	PNRC2	-0.0565184	0.00900273	3.43132e-10	0.842012	protein_coding	TRUE	PNRC2
chr1	ENSG00000131238	cg00695362	rs3131656	PPT1	-0.0348935	0.00538468	9.16345e-11	0.756453	protein_coding	TRUE	PPT1
chr1	ENSG00000131238	cg08166631	rs3131656	PPT1	0.0305117	0.00606985	4.98825e-07	0.0608407	protein_coding	TRUE	PPT1
chr1	ENSG00000116514	cg14806693	rs520309	RNF19B	-0.0944446	0.0131446	6.71708e-13	0.190231	protein_coding	TRUE	RNF19B
chr1	ENSG00000116514	cg10120255	rs520309	RNF19B	-0.0530802	0.00780125	1.0171e-11	0.90602	protein_coding	TRUE	RNF19B
chr1	ENSG00000116514	cg00843917	rs520309	RNF19B	-0.0531921	0.00896236	2.93747e-09	0.846152	protein_coding	TRUE	RNF19B
chr1	ENSG00000116514	cg12919773	rs520309	RNF19B	-0.0409853	0.00800346	3.04003e-07	0.228173	protein_coding	TRUE	RNF19B
chr1	ENSG00000227533	cg20282814	rs710221	SLC2A1-AS1	-0.0989699	0.0194183	3.45578e-07	0.189213	lncRNA	TRUE	SLC2A1-AS1
chr1	ENSG00000133069	cg11170025	rs1172113	TMCC2	-0.0573116	0.00958425	2.23449e-09	0.202609	protein_coding	TRUE	TMCC2
chr1	ENSG00000133069	cg10768996	rs1172113	TMCC2	-0.0481559	0.00870377	3.15234e-08	0.544424	protein_coding	TRUE	TMCC2
chr10	ENSG00000099204	cg15294435	rs7904491	ABLIM1	-0.0175263	0.00317651	3.4391e-08	0.920048	protein_coding	TRUE	ABLIM1
chr10	ENSG00000099204	cg12736146	rs7904491	ABLIM1	-0.0165595	0.00305754	6.09651e-08	0.773613	protein_coding	TRUE	ABLIM1
chr10	ENSG00000099204	cg21050356	rs7904491	ABLIM1	-0.0153895	0.00287903	9.02209e-08	0.89501	protein_coding	TRUE	ABLIM1
chr10	ENSG00000099204	cg01315572	rs7904491	ABLIM1	-0.02189	0.00410784	9.88407e-08	0.580612	protein_coding	TRUE	ABLIM1
chr10	ENSG00000099204	cg20218110	rs7904491	ABLIM1	-0.0119683	0.00226426	1.25203e-07	0.635027	protein_coding	TRUE	ABLIM1
chr10	ENSG00000099204	cg26760942	rs7904491	ABLIM1	-0.011137	0.00214661	2.12351e-07	0.956074	protein_coding	TRUE	ABLIM1
chr10	ENSG00000099204	cg18680346	rs7904491	ABLIM1	-0.0332104	0.00640228	2.13387e-07	0.973684	protein_coding	TRUE	ABLIM1
chr10	ENSG00000099204	cg01449818	rs7904491	ABLIM1	-0.00891693	0.00172556	2.3716e-07	0.88045	protein_coding	TRUE	ABLIM1
chr10	ENSG00000099204	cg03223072	rs7904491	ABLIM1	-0.00913145	0.00177553	2.70459e-07	0.730511	protein_coding	TRUE	ABLIM1
chr10	ENSG00000099204	cg08587685	rs7904491	ABLIM1	-0.0131242	0.00255189	2.70482e-07	0.172649	protein_coding	TRUE	ABLIM1
chr10	ENSG00000099204	cg18574731	rs7904491	ABLIM1	-0.00765045	0.00153737	6.48077e-07	0.791969	protein_coding	TRUE	ABLIM1
chr10	ENSG00000099204	cg19936380	rs7904491	ABLIM1	-0.00989743	0.00199958	7.43022e-07	0.979588	protein_coding	TRUE	ABLIM1
chr10	ENSG00000099204	cg06769992	rs7904491	ABLIM1	-0.00929898	0.00188113	7.68142e-07	0.673655	protein_coding	TRUE	ABLIM1
chr10	ENSG00000165322	cg04359828	rs144466157	ARHGAP12	-0.0560445	0.00485946	8.9881e-31	0.863702	protein_coding	TRUE	ARHGAP12
chr10	ENSG00000165322	cg26784012	rs144466157	ARHGAP12	-0.0470052	0.00434491	2.81474e-27	0.925554	protein_coding	TRUE	ARHGAP12
chr10	ENSG00000165322	cg18675610	rs144466157	ARHGAP12	-0.0501861	0.00482028	2.19839e-25	0.978876	protein_coding	TRUE	ARHGAP12
chr10	ENSG00000165322	cg02093006	rs144466157	ARHGAP12	-0.0304958	0.00320012	1.57928e-21	0.558729	protein_coding	TRUE	ARHGAP12
chr10	ENSG00000165322	cg21279476	rs144466157	ARHGAP12	-0.0214536	0.00244207	1.56365e-18	0.173304	protein_coding	TRUE	ARHGAP12
chr10	ENSG00000165322	cg09642378	rs144466157	ARHGAP12	-0.0297513	0.00352565	3.21365e-17	0.306942	protein_coding	TRUE	ARHGAP12
chr10	ENSG00000165322	cg22706007	rs144466157	ARHGAP12	-0.0196343	0.00319068	7.5729e-10	0.799734	protein_coding	TRUE	ARHGAP12
chr10	ENSG00000165322	cg06004637	rs144466157	ARHGAP12	-0.0136302	0.00241624	1.68989e-08	0.713897	protein_coding	TRUE	ARHGAP12
chr10	ENSG00000165322	cg23473204	rs144466157	ARHGAP12	0.0102857	0.00203731	4.44885e-07	0.229638	protein_coding	TRUE	ARHGAP12
chr10	ENSG00000166033	cg16466810	rs4991294	HTRA1	-0.0135791	0.0022753	2.40107e-09	0.650275	protein_coding	TRUE	HTRA1
chr10	ENSG00000166033	cg04970100	rs4991294	HTRA1	-0.0155257	0.00279374	2.73968e-08	0.823094	protein_coding	TRUE	HTRA1
chr10	ENSG00000166033	cg21647373	rs4991294	HTRA1	-0.0148384	0.00279178	1.06641e-07	0.335265	protein_coding	TRUE	HTRA1
chr10	ENSG00000232656	cg17288694	rs11250244	IDI2-AS1	0.259867	0.0388832	2.33686e-11	0.10069	lncRNA	TRUE	IDI2-AS1
chr10	ENSG00000232656	cg11799387	rs11250244	IDI2-AS1	-0.202964	0.0401282	4.23906e-07	0.205688	lncRNA	TRUE	IDI2-AS1
chr10	ENSG00000120594	cg07534516	rs6482066	PLXDC2	-0.0116648	0.00122683	1.94315e-21	0.169138	protein_coding	TRUE	PLXDC2
chr10	ENSG00000120594	cg27401333	rs6482066	PLXDC2	-0.0111577	0.00138266	7.04691e-16	0.122713	protein_coding	TRUE	PLXDC2
chr10	ENSG00000120594	cg14024017	rs6482066	PLXDC2	-0.00886938	0.00114432	9.13473e-15	0.251064	protein_coding	TRUE	PLXDC2
chr10	ENSG00000120594	cg12723985	rs6482066	PLXDC2	-0.00806253	0.00110206	2.55725e-13	0.251556	protein_coding	TRUE	PLXDC2
chr10	ENSG00000120594	cg03898108	rs6482066	PLXDC2	-0.00736912	0.00102249	5.7187e-13	0.301635	protein_coding	TRUE	PLXDC2
chr10	ENSG00000120594	cg15657225	rs6482066	PLXDC2	0.00347872	0.00049506	2.11213e-12	0.0941345	protein_coding	TRUE	PLXDC2
chr10	ENSG00000120594	cg03631457	rs6482066	PLXDC2	-0.00697804	0.00110428	2.63116e-10	0.308269	protein_coding	TRUE	PLXDC2
chr10	ENSG00000148604	cg13133883	rs10736319	RGR	-0.00265027	0.000475713	2.53052e-08	0.41507	protein_coding	TRUE	RGR
chr10	ENSG00000198964	cg14611218	rs10508930	SGMS1	-0.103397	0.00883726	1.2733e-31	0.109626	protein_coding	TRUE	SGMS1
chr10	ENSG00000198964	cg03585110	rs10508930	SGMS1	-0.101011	0.00955545	4.05763e-26	0.182982	protein_coding	TRUE	SGMS1
chr10	ENSG00000198964	cg07494431	rs10508930	SGMS1	-0.0744395	0.00740204	8.58951e-24	0.136503	protein_coding	TRUE	SGMS1
chr10	ENSG00000198964	cg13784163	rs10508930	SGMS1	-0.0556455	0.00610516	7.90398e-20	0.152102	protein_coding	TRUE	SGMS1
chr10	ENSG00000198964	cg22388374	rs10508930	SGMS1	-0.0383631	0.0043422	1.00155e-18	0.0703718	protein_coding	TRUE	SGMS1
chr10	ENSG00000198964	cg11764846	rs10508930	SGMS1	-0.0619956	0.00706659	1.73882e-18	0.204137	protein_coding	TRUE	SGMS1
chr10	ENSG00000198964	cg13382516	rs10508930	SGMS1	-0.0427821	0.00498368	9.12885e-18	0.224517	protein_coding	TRUE	SGMS1
chr10	ENSG00000198964	cg15678767	rs10508930	SGMS1	-0.0507086	0.00609995	9.33537e-17	0.324342	protein_coding	TRUE	SGMS1
chr10	ENSG00000198964	cg08363235	rs10508930	SGMS1	-0.0523193	0.00646399	5.77577e-16	0.278436	protein_coding	TRUE	SGMS1
chr10	ENSG00000198964	cg24037270	rs10508930	SGMS1	-0.045444	0.00602828	4.75506e-14	0.171555	protein_coding	TRUE	SGMS1
chr10	ENSG00000198964	cg20014988	rs10508930	SGMS1	-0.0308285	0.00423181	3.21807e-13	0.302432	protein_coding	TRUE	SGMS1
chr10	ENSG00000198964	cg00168459	rs10508930	SGMS1	-0.0324091	0.00476716	1.05777e-11	0.31714	protein_coding	TRUE	SGMS1
chr10	ENSG00000198964	cg00453368	rs10508930	SGMS1	-0.0298116	0.00452214	4.32898e-11	0.175753	protein_coding	TRUE	SGMS1
chr10	ENSG00000198964	cg10188795	rs10508930	SGMS1	-0.0362128	0.00565153	1.47813e-10	0.319488	protein_coding	TRUE	SGMS1
chr10	ENSG00000198964	cg17673495	rs10508930	SGMS1	-0.02097	0.00329029	1.84997e-10	0.852327	protein_coding	TRUE	SGMS1
chr10	ENSG00000198964	cg00936935	rs10508930	SGMS1	-0.0259636	0.00407952	1.96081e-10	0.0640385	protein_coding	TRUE	SGMS1
chr10	ENSG00000198964	cg05102856	rs10508930	SGMS1	-0.0268535	0.00456583	4.06798e-09	0.36675	protein_coding	TRUE	SGMS1
chr10	ENSG00000198964	cg08557120	rs10508930	SGMS1	-0.022561	0.00430791	1.63102e-07	0.205865	protein_coding	TRUE	SGMS1
chr10	ENSG00000226200	cg02249577	rs56138205	SGMS1-AS1	-0.591911	0.116195	3.50355e-07	0.0920323	lncRNA	TRUE	SGMS1-AS1
chr11	ENSG00000167995	cg20584555	rs972355	BEST1	-0.102634	0.00951155	3.82075e-27	0.673119	protein_coding	TRUE	BEST1
chr11	ENSG00000167995	cg11562596	rs972355	BEST1	-0.121024	0.0113095	1.00588e-26	0.520817	protein_coding	TRUE	BEST1
chr11	ENSG00000167995	cg05481452	rs972355	BEST1	-0.0959098	0.0093202	7.77445e-25	0.624247	protein_coding	TRUE	BEST1
chr11	ENSG00000167995	cg06068935	rs972355	BEST1	-0.0803521	0.0082047	1.20165e-22	0.342823	protein_coding	TRUE	BEST1
chr11	ENSG00000167995	cg15456821	rs972355	BEST1	-0.0494438	0.00598607	1.45899e-16	0.487059	protein_coding	TRUE	BEST1
chr11	ENSG00000167995	cg23584647	rs972355	BEST1	-0.0248761	0.00328589	3.71563e-14	0.532145	protein_coding	TRUE	BEST1
chr11	ENSG00000167995	cg24944820	rs972355	BEST1	0.0140578	0.00267386	1.46033e-07	0.429469	protein_coding	TRUE	BEST1
chr11	ENSG00000167995	cg22892043	rs972355	BEST1	-0.0229779	0.00457228	5.02207e-07	0.718476	protein_coding	TRUE	BEST1
chr11	ENSG00000023171	cg09612920	rs2846310	GRAMD1B	-0.00520539	0.00100121	2.00275e-07	0.921182	protein_coding	TRUE	GRAMD1B
chr11	ENSG00000023171	cg12728690	rs2846310	GRAMD1B	-0.00781366	0.0015287	3.19935e-07	0.766475	protein_coding	TRUE	GRAMD1B
chr11	ENSG00000023171	cg24961445	rs17127435	GRAMD1B	-0.00692937	0.00137253	4.45023e-07	0.262301	protein_coding	TRUE	GRAMD1B
chr11	ENSG00000023171	cg13709043	rs17127435	GRAMD1B	-0.0114652	0.00231881	7.63653e-07	0.149564	protein_coding	TRUE	GRAMD1B
chr11	ENSG00000110514	cg23350132	rs10501320	MADD	-0.0101815	0.00177921	1.05005e-08	0.615864	protein_coding	TRUE	MADD
chr11	ENSG00000110514	cg22070650	rs10501320	MADD	-0.0118505	0.00210463	1.79514e-08	0.223299	protein_coding	TRUE	MADD
chr11	ENSG00000110514	cg27221977	rs10501320	MADD	-0.00863619	0.00169089	3.26507e-07	0.583895	protein_coding	TRUE	MADD
chr11	ENSG00000110436	cg14479638	rs675227	SLC1A2	-0.0138513	0.0025262	4.18048e-08	0.99382	protein_coding	TRUE	SLC1A2
chr11	ENSG00000110436	cg27610672	rs675227	SLC1A2	-0.0137869	0.00255216	6.58902e-08	0.995542	protein_coding	TRUE	SLC1A2
chr11	ENSG00000110436	cg25963980	rs675227	SLC1A2	-0.0108513	0.00201417	7.14475e-08	0.931844	protein_coding	TRUE	SLC1A2
chr11	ENSG00000110436	cg07358852	rs675227	SLC1A2	-0.0118063	0.0022352	1.27783e-07	0.983784	protein_coding	TRUE	SLC1A2
chr11	ENSG00000110436	cg19653967	rs675227	SLC1A2	-0.0087869	0.00177146	7.03958e-07	0.979516	protein_coding	TRUE	SLC1A2
chr11	ENSG00000167987	cg23043946	rs519296	VPS37C	-0.0405772	0.00413713	1.03941e-22	0.0933595	protein_coding	TRUE	VPS37C
chr11	ENSG00000167987	cg02920403	rs519296	VPS37C	-0.064854	0.00672268	5.05908e-22	0.458297	protein_coding	TRUE	VPS37C
chr11	ENSG00000167987	cg26241240	rs519296	VPS37C	-0.0211172	0.00240078	1.4181e-18	0.39838	protein_coding	TRUE	VPS37C
chr11	ENSG00000167987	cg09664380	rs519296	VPS37C	-0.0165166	0.00208462	2.3167e-15	0.0749271	protein_coding	TRUE	VPS37C
chr11	ENSG00000167987	cg21871670	rs519296	VPS37C	0.00696191	0.00139883	6.45968e-07	0.312669	protein_coding	TRUE	VPS37C
chr12	ENSG00000256783	cg27523351	rs60784430	AC079031.1	-0.0603863	0.0115748	1.81811e-07	0.431643	lncRNA	TRUE	RP11-503G7.1
chr12	ENSG00000256783	cg15844201	rs60784430	AC079031.1	-0.087994	0.0175044	4.98327e-07	0.21672	lncRNA	TRUE	RP11-503G7.1
chr12	ENSG00000256875	cg27523351	rs12309386	AC079031.2	-0.0368466	0.00675208	4.84045e-08	0.939717	lncRNA	TRUE	RP11-503G7.2
chr12	ENSG00000151062	cg09709522	rs13219	CACNA2D4	0.00536663	0.00104622	2.9047e-07	0.126366	protein_coding	TRUE	CACNA2D4
chr12	ENSG00000072609	cg09537870	rs146419925	CHFR	0.247028	0.0299315	1.54304e-16	0.29287	protein_coding	TRUE	CHFR
chr12	ENSG00000072609	cg02243221	rs146419925	CHFR	0.251282	0.0310599	5.95458e-16	0.0864688	protein_coding	TRUE	CHFR
chr12	ENSG00000072609	cg22149555	rs146419925	CHFR	0.219465	0.02723	7.64922e-16	0.267313	protein_coding	TRUE	CHFR
chr12	ENSG00000072609	cg16020270	rs146419925	CHFR	0.198127	0.0247231	1.112e-15	0.242804	protein_coding	TRUE	CHFR
chr12	ENSG00000072609	cg10388270	rs146419925	CHFR	0.272175	0.0339708	1.12817e-15	0.117089	protein_coding	TRUE	CHFR
chr12	ENSG00000072609	cg05614952	rs146419925	CHFR	0.295666	0.0369105	1.14364e-15	0.103314	protein_coding	TRUE	CHFR
chr12	ENSG00000072609	cg23058246	rs146419925	CHFR	0.254661	0.0326159	5.81657e-15	0.762895	protein_coding	TRUE	CHFR
chr12	ENSG00000072609	cg03425615	rs146419925	CHFR	0.249165	0.0321156	8.60344e-15	0.541971	protein_coding	TRUE	CHFR
chr12	ENSG00000072609	cg23470262	rs146419925	CHFR	0.206125	0.0265854	8.95172e-15	0.227059	protein_coding	TRUE	CHFR
chr12	ENSG00000072609	cg08695912	rs146419925	CHFR	0.210576	0.0280593	6.15812e-14	0.850787	protein_coding	TRUE	CHFR
chr12	ENSG00000072609	cg13046214	rs146419925	CHFR	0.273205	0.0369235	1.36978e-13	0.968031	protein_coding	TRUE	CHFR
chr12	ENSG00000072609	cg20765580	rs146419925	CHFR	0.162756	0.0226217	6.26046e-13	0.987981	protein_coding	TRUE	CHFR
chr12	ENSG00000072609	cg07052262	rs146419925	CHFR	0.168423	0.0236667	1.10753e-12	0.669913	protein_coding	TRUE	CHFR
chr12	ENSG00000072609	cg16120883	rs146419925	CHFR	0.210283	0.0304078	4.66437e-12	0.999318	protein_coding	TRUE	CHFR
chr12	ENSG00000072609	cg19837214	rs146419925	CHFR	0.115511	0.017216	1.95255e-11	0.971495	protein_coding	TRUE	CHFR
chr12	ENSG00000072609	cg22844555	rs146419925	CHFR	0.1165	0.0177896	5.80236e-11	0.998623	protein_coding	TRUE	CHFR
chr12	ENSG00000072609	cg08424446	rs146419925	CHFR	0.177148	0.0279057	2.17981e-10	0.974135	protein_coding	TRUE	CHFR
chr12	ENSG00000072609	cg03538318	rs146419925	CHFR	0.128269	0.0208186	7.21558e-10	0.593211	protein_coding	TRUE	CHFR
chr12	ENSG00000072609	cg16214937	rs146419925	CHFR	0.125906	0.0206589	1.0977e-09	0.981388	protein_coding	TRUE	CHFR
chr12	ENSG00000072609	cg05625100	rs146419925	CHFR	0.260223	0.0431997	1.7046e-09	0.110619	protein_coding	TRUE	CHFR
chr12	ENSG00000072609	cg14903202	rs146419925	CHFR	0.113285	0.0188843	1.98703e-09	0.965055	protein_coding	TRUE	CHFR
chr12	ENSG00000072609	cg03279164	rs146419925	CHFR	0.090096	0.0160158	1.85032e-08	0.685231	protein_coding	TRUE	CHFR
chr12	ENSG00000072609	cg08409956	rs146419925	CHFR	0.126781	0.0229612	3.36029e-08	0.671932	protein_coding	TRUE	CHFR
chr12	ENSG00000072609	cg15108326	rs146419925	CHFR	0.108676	0.0200044	5.55433e-08	0.969323	protein_coding	TRUE	CHFR
chr12	ENSG00000072609	cg14949892	rs146419925	CHFR	0.119602	0.0222187	7.32725e-08	0.53122	protein_coding	TRUE	CHFR
chr12	ENSG00000072609	cg09904296	rs146419925	CHFR	-0.0747003	0.0139161	7.96545e-08	0.353632	protein_coding	TRUE	CHFR
chr12	ENSG00000072609	cg13614819	rs146419925	CHFR	0.0991084	0.0188337	1.42281e-07	0.143917	protein_coding	TRUE	CHFR
chr12	ENSG00000072609	cg16300310	rs146419925	CHFR	0.0942715	0.018424	3.10809e-07	0.955691	protein_coding	TRUE	CHFR
chr12	ENSG00000072609	cg12532141	rs146419925	CHFR	0.0652437	0.0128934	4.18742e-07	0.761765	protein_coding	TRUE	CHFR
chr12	ENSG00000090615	cg09537870	rs61952781	GOLGA3	-0.0214885	0.00249766	7.73504e-18	0.786187	protein_coding	TRUE	GOLGA3
chr12	ENSG00000090615	cg10388270	rs61952781	GOLGA3	-0.0238694	0.00284165	4.47096e-17	0.352894	protein_coding	TRUE	GOLGA3
chr12	ENSG00000090615	cg02243221	rs61952781	GOLGA3	-0.0215531	0.00258698	7.99122e-17	0.552128	protein_coding	TRUE	GOLGA3
chr12	ENSG00000090615	cg22149555	rs61952781	GOLGA3	-0.0188929	0.00226978	8.52879e-17	0.643334	protein_coding	TRUE	GOLGA3
chr12	ENSG00000090615	cg16020270	rs61952781	GOLGA3	-0.0170709	0.00206156	1.22592e-16	0.52996	protein_coding	TRUE	GOLGA3
chr12	ENSG00000090615	cg05614952	rs61952781	GOLGA3	-0.0252647	0.00307341	2.02794e-16	0.344292	protein_coding	TRUE	GOLGA3
chr12	ENSG00000090615	cg23470262	rs61952781	GOLGA3	-0.0180112	0.00222455	5.65477e-16	0.368836	protein_coding	TRUE	GOLGA3
chr12	ENSG00000090615	cg23058246	rs61952781	GOLGA3	-0.0219405	0.00272213	7.62657e-16	0.551709	protein_coding	TRUE	GOLGA3
chr12	ENSG00000090615	cg03425615	rs61952781	GOLGA3	-0.0215559	0.00268278	9.36522e-16	0.87903	protein_coding	TRUE	GOLGA3
chr12	ENSG00000090615	cg08695912	rs61952781	GOLGA3	-0.0181245	0.00234449	1.06968e-14	0.801153	protein_coding	TRUE	GOLGA3
chr12	ENSG00000090615	cg13046214	rs61952781	GOLGA3	-0.0231457	0.00307932	5.62623e-14	0.805386	protein_coding	TRUE	GOLGA3
chr12	ENSG00000090615	cg07052262	rs61952781	GOLGA3	-0.0145623	0.00198184	2.01374e-13	0.783899	protein_coding	TRUE	GOLGA3
chr12	ENSG00000090615	cg20765580	rs61952781	GOLGA3	-0.0137839	0.00188832	2.8866e-13	0.809275	protein_coding	TRUE	GOLGA3
chr12	ENSG00000090615	cg19837214	rs61952781	GOLGA3	-0.0101366	0.00144647	2.42066e-12	0.946832	protein_coding	TRUE	GOLGA3
chr12	ENSG00000090615	cg16120883	rs61952781	GOLGA3	-0.0177076	0.00253965	3.11447e-12	0.795096	protein_coding	TRUE	GOLGA3
chr12	ENSG00000090615	cg03538318	rs61952781	GOLGA3	-0.0115405	0.00175664	5.04399e-11	0.452185	protein_coding	TRUE	GOLGA3
chr12	ENSG00000090615	cg22844555	rs61952781	GOLGA3	-0.00969468	0.00148632	6.90952e-11	0.668715	protein_coding	TRUE	GOLGA3
chr12	ENSG00000090615	cg08424446	rs61952781	GOLGA3	-0.0152182	0.00234156	8.07617e-11	0.957843	protein_coding	TRUE	GOLGA3
chr12	ENSG00000090615	cg05625100	rs61952781	GOLGA3	-0.0227841	0.00363581	3.69058e-10	0.0932526	protein_coding	TRUE	GOLGA3
chr12	ENSG00000090615	cg16214937	rs61952781	GOLGA3	-0.0107734	0.00173434	5.23794e-10	0.5407	protein_coding	TRUE	GOLGA3
chr12	ENSG00000090615	cg14903202	rs61952781	GOLGA3	-0.00940278	0.0015814	2.75034e-09	0.556391	protein_coding	TRUE	GOLGA3
chr12	ENSG00000090615	cg09904296	rs61952781	GOLGA3	0.0067151	0.00117574	1.12069e-08	0.453104	protein_coding	TRUE	GOLGA3
chr12	ENSG00000090615	cg08409956	rs61952781	GOLGA3	-0.0109316	0.00193257	1.54475e-08	0.786602	protein_coding	TRUE	GOLGA3
chr12	ENSG00000090615	cg03279164	rs61952781	GOLGA3	-0.00754665	0.00134434	1.981e-08	0.594191	protein_coding	TRUE	GOLGA3
chr12	ENSG00000090615	cg14949892	rs61952781	GOLGA3	-0.0102266	0.00186963	4.50403e-08	0.610201	protein_coding	TRUE	GOLGA3
chr12	ENSG00000090615	cg12532141	rs61952781	GOLGA3	-0.00564174	0.00108684	2.09224e-07	0.654012	protein_coding	TRUE	GOLGA3
chr12	ENSG00000090615	cg15108326	rs61952781	GOLGA3	-0.00866498	0.00167444	2.28073e-07	0.904989	protein_coding	TRUE	GOLGA3
chr12	ENSG00000090615	cg16300310	rs61952781	GOLGA3	-0.00794947	0.00155011	2.92339e-07	0.709114	protein_coding	TRUE	GOLGA3
chr12	ENSG00000090615	cg14168939	rs61952781	GOLGA3	-0.00794493	0.00158489	5.36114e-07	0.693391	protein_coding	TRUE	GOLGA3
chr12	ENSG00000090615	cg23149010	rs61952781	GOLGA3	-0.00604277	0.00121018	5.93674e-07	0.699473	protein_coding	TRUE	GOLGA3
chr12	ENSG00000051825	cg01030110	rs1727294	MPHOSPH9	0.0262689	0.00380851	5.29576e-12	0.159345	protein_coding	TRUE	MPHOSPH9
chr12	ENSG00000051825	cg22341471	rs1727294	MPHOSPH9	-0.0160581	0.00258658	5.35837e-10	0.933397	protein_coding	TRUE	MPHOSPH9
chr12	ENSG00000051825	cg16697799	rs1727294	MPHOSPH9	0.0303488	0.00495052	8.76476e-10	0.407814	protein_coding	TRUE	MPHOSPH9
chr12	ENSG00000051825	cg02203224	rs1727294	MPHOSPH9	0.0344748	0.00575673	2.11655e-09	0.116551	protein_coding	TRUE	MPHOSPH9
chr12	ENSG00000051825	cg00585698	rs1727294	MPHOSPH9	0.0201149	0.00341508	3.86115e-09	0.321537	protein_coding	TRUE	MPHOSPH9
chr12	ENSG00000051825	cg26705986	rs1727294	MPHOSPH9	0.0322565	0.00583934	3.31378e-08	0.334767	protein_coding	TRUE	MPHOSPH9
chr12	ENSG00000139725	cg26392922	rs1168663	RHOF	-0.486403	0.0793139	8.64343e-10	0.903965	protein_coding	TRUE	RHOF
chr13	ENSG00000253710	cg02071074	rs73184330	ALG11	0.191281	0.0339581	1.77264e-08	0.262003	protein_coding	TRUE	ALG11
chr13	ENSG00000123179	cg20399252	rs3809325	EBPL	-0.293379	0.0576887	3.66558e-07	0.569727	protein_coding	TRUE	EBPL
chr13	ENSG00000183098	cg17351439	rs1577099	GPC6	-0.0763129	0.010738	1.18737e-12	0.715925	protein_coding	TRUE	GPC6
chr13	ENSG00000172915	cg08520986	rs9574068	NBEA	-0.0195926	0.0038911	4.77275e-07	0.380037	protein_coding	TRUE	NBEA
chr13	ENSG00000127870	cg02305431	rs56875324	RNF6	-0.0386418	0.00748976	2.47888e-07	0.594868	protein_coding	TRUE	RNF6
chr14	ENSG00000100884	cg00524400	rs62000824	CPNE6	0.17179	0.0330409	2.0002e-07	0.176217	protein_coding	TRUE	CPNE6
chr14	ENSG00000100884	cg23112188	rs62000824	CPNE6	0.151279	0.0301421	5.19793e-07	0.244156	protein_coding	TRUE	CPNE6
chr14	ENSG00000100884	cg22775413	rs62000824	CPNE6	0.123259	0.0246781	5.89311e-07	0.2072	protein_coding	TRUE	CPNE6
chr14	ENSG00000066629	cg26180015	rs11625037	EML1	-0.0564643	0.00986274	1.03424e-08	0.620228	protein_coding	TRUE	EML1
chr14	ENSG00000066629	cg08669673	rs11625037	EML1	-0.0457343	0.0084766	6.83871e-08	0.653147	protein_coding	TRUE	EML1
chr14	ENSG00000066629	cg01811583	rs11625037	EML1	-0.029895	0.005677	1.39432e-07	0.653135	protein_coding	TRUE	EML1
chr14	ENSG00000066629	cg13725826	rs11625037	EML1	-0.0460678	0.00899962	3.07379e-07	0.429083	protein_coding	TRUE	EML1
chr14	ENSG00000100577	cg02181287	rs8008449	GSTZ1	-0.128309	0.0241613	1.09318e-07	0.569938	protein_coding	TRUE	GSTZ1
chr14	ENSG00000198133	cg02772825	rs1555399	TMEM229B	-0.137852	0.0212295	8.39008e-11	0.653923	protein_coding	TRUE	TMEM229B
chr14	ENSG00000198133	cg08778580	rs1555399	TMEM229B	-0.0782376	0.0131618	2.77676e-09	0.793782	protein_coding	TRUE	TMEM229B
chr14	ENSG00000198133	cg25006823	rs1555399	TMEM229B	-0.0818067	0.0154661	1.22708e-07	0.885521	protein_coding	TRUE	TMEM229B
chr14	ENSG00000198133	cg25786405	rs1555399	TMEM229B	-0.0899503	0.0173919	2.31653e-07	0.85799	protein_coding	TRUE	TMEM229B
chr15	ENSG00000269951	cg16104837	rs938501	AC090181.2	1.66817	0.328151	3.70457e-07	0.224123	lncRNA	TRUE	RP11-797A18.6
chr15	ENSG00000269951	cg11829253	rs938501	AC090181.2	1.78863	0.356156	5.11244e-07	0.191067	lncRNA	TRUE	RP11-797A18.6
chr15	ENSG00000269951	cg09192711	rs938501	AC090181.2	1.13691	0.231251	8.81761e-07	0.233851	lncRNA	TRUE	RP11-797A18.6
chr15	ENSG00000198794	cg15902774	rs7342591	SCAMP5	-0.0069411	0.0012592	3.54165e-08	0.473176	protein_coding	TRUE	SCAMP5
chr15	ENSG00000171914	cg26710563	rs2459898	TLN2	-0.0252041	0.00371917	1.2287e-11	0.559083	protein_coding	TRUE	TLN2
chr15	ENSG00000171914	cg14110457	rs2459898	TLN2	-0.0232579	0.00406885	1.09006e-08	0.353146	protein_coding	TRUE	TLN2
chr15	ENSG00000171914	cg01956614	rs2459898	TLN2	-0.0201165	0.00387674	2.11383e-07	0.378084	protein_coding	TRUE	TLN2
chr15	ENSG00000140391	cg16104837	rs11630497	TSPAN3	0.013291	0.00171833	1.03518e-14	0.648841	protein_coding	TRUE	TSPAN3
chr15	ENSG00000140391	cg11829253	rs11630497	TSPAN3	0.0141811	0.00189307	6.83083e-14	0.801344	protein_coding	TRUE	TSPAN3
chr15	ENSG00000140391	cg09192711	rs11630497	TSPAN3	0.00910562	0.00126173	5.32411e-13	0.718866	protein_coding	TRUE	TSPAN3
chr15	ENSG00000140391	cg05046814	rs11630497	TSPAN3	0.0135836	0.00214173	2.26267e-10	0.910613	protein_coding	TRUE	TSPAN3
chr15	ENSG00000140391	cg23627990	rs11630497	TSPAN3	-0.0106609	0.00199985	9.77583e-08	0.701911	protein_coding	TRUE	TSPAN3
chr15	ENSG00000140391	cg05142942	rs11630497	TSPAN3	0.00807844	0.00151752	1.01819e-07	0.678442	protein_coding	TRUE	TSPAN3
chr16	ENSG00000260922	cg03412045	rs1974890	AC009139.1	-3.24021	0.49243	4.70329e-11	0.254897	lncRNA	TRUE	RP11-538I12.3
chr16	ENSG00000103264	cg26593722	rs8059409	FBXO31	-0.030376	0.00387673	4.67068e-15	0.846821	protein_coding	TRUE	FBXO31
chr16	ENSG00000103264	cg05259094	rs8059409	FBXO31	-0.0477441	0.00652921	2.62429e-13	0.815506	protein_coding	TRUE	FBXO31
chr16	ENSG00000103264	cg04872075	rs8059409	FBXO31	-0.0370699	0.00528151	2.23776e-12	0.433441	protein_coding	TRUE	FBXO31
chr16	ENSG00000103264	cg02626269	rs8059409	FBXO31	-0.0243439	0.00347222	2.36541e-12	0.930476	protein_coding	TRUE	FBXO31
chr16	ENSG00000103264	cg02552868	rs8059409	FBXO31	-0.0316582	0.00483964	6.09283e-11	0.958792	protein_coding	TRUE	FBXO31
chr16	ENSG00000103264	cg06654782	rs8059409	FBXO31	-0.0158092	0.00278063	1.3046e-08	0.793245	protein_coding	TRUE	FBXO31
chr16	ENSG00000140941	cg26593722	rs8059409	MAP1LC3B	0.0349166	0.00628728	2.79967e-08	0.859431	protein_coding	TRUE	MAP1LC3B
chr16	ENSG00000140941	cg05259094	rs8059409	MAP1LC3B	0.0548809	0.0102434	8.42936e-08	0.871122	protein_coding	TRUE	MAP1LC3B
chr16	ENSG00000140941	cg04872075	rs8059409	MAP1LC3B	0.0426111	0.00813354	1.61507e-07	0.776647	protein_coding	TRUE	MAP1LC3B
chr16	ENSG00000140941	cg02626269	rs8059409	MAP1LC3B	0.0279828	0.00534462	1.64356e-07	0.963961	protein_coding	TRUE	MAP1LC3B
chr16	ENSG00000140941	cg02552868	rs8059409	MAP1LC3B	0.0363905	0.00723296	4.87405e-07	0.988386	protein_coding	TRUE	MAP1LC3B
chr16	ENSG00000103111	cg09546168	rs2232509	MON1B	-0.0131069	0.00262288	5.81856e-07	0.587883	protein_coding	TRUE	MON1B
chr16	ENSG00000234719	cg16495772	rs393329	NPIPB2	-0.166495	0.0149642	9.35681e-29	0.273358	protein_coding	TRUE	RP11-166B2.1
chr16	ENSG00000234719	cg03082108	rs393329	NPIPB2	-0.0478907	0.00617039	8.40091e-15	0.610912	protein_coding	TRUE	RP11-166B2.1
chr17	ENSG00000247011	cg00979937	rs4794193	AC005920.1	-1.226	0.221816	3.25497e-08	0.0945965	lncRNA	TRUE	RP11-700H6.1
chr17	ENSG00000267665	cg06263341	rs36085797	AC021683.3	-0.053529	0.00900297	2.75274e-09	0.304298	lncRNA	TRUE	RP11-13K12.2
chr17	ENSG00000267665	cg19974715	rs36085797	AC021683.3	-0.0776786	0.0136635	1.30729e-08	0.91935	lncRNA	TRUE	RP11-13K12.2
chr17	ENSG00000262877	cg10914865	rs67602958	AC110285.2	-0.0320836	0.00648595	7.55114e-07	0.60614	lncRNA	TRUE	RP11-1055B8.4
chr17	ENSG00000172992	cg21472184	rs4793173	DCAKD	-0.093004	0.0110205	3.19461e-17	0.0705818	protein_coding	TRUE	DCAKD
chr17	ENSG00000172992	cg12204149	rs4793173	DCAKD	-0.0585224	0.00955827	9.20026e-10	0.0937097	protein_coding	TRUE	DCAKD
chr17	ENSG00000172992	cg00693004	rs59246405	DCAKD	-0.123743	0.0239998	2.52273e-07	0.554466	protein_coding	TRUE	DCAKD
chr17	ENSG00000172992	cg16177647	rs4793173	DCAKD	-0.0359168	0.00722661	6.69252e-07	0.0911667	protein_coding	TRUE	DCAKD
chr17	ENSG00000070495	cg20832875	rs2240774	JMJD6	-0.0456153	0.00770466	3.20993e-09	0.691549	protein_coding	TRUE	JMJD6
chr17	ENSG00000070495	cg27546012	rs2240774	JMJD6	-0.0169664	0.00332393	3.31998e-07	0.944203	protein_coding	TRUE	JMJD6
chr17	ENSG00000136448	cg20390283	rs112106588	NMT1	0.0475883	0.00841741	1.57165e-08	0.448522	protein_coding	TRUE	NMT1
chr17	ENSG00000136448	cg21472184	rs112106588	NMT1	0.0496168	0.00907318	4.53832e-08	0.0549404	protein_coding	TRUE	NMT1
chr17	ENSG00000136448	cg07102235	rs113170866	NMT1	0.021923	0.00424345	2.38757e-07	0.695535	protein_coding	TRUE	NMT1
chr17	ENSG00000136448	cg16177647	rs7226225	NMT1	0.0313332	0.0063605	8.38351e-07	0.542797	protein_coding	TRUE	NMT1
chr17	ENSG00000109047	cg18630794	rs75438860	RCVRN	0.000619522	0.000103958	2.53246e-09	0.0899108	protein_coding	TRUE	RCVRN
chr17	ENSG00000109047	cg20207911	rs75438860	RCVRN	0.000552892	9.87664e-05	2.16865e-08	0.594399	protein_coding	TRUE	RCVRN
chr17	ENSG00000261873	cg09309112	rs7213282	SMIM36	-0.0517542	0.00729519	1.30019e-12	0.222985	protein_coding	TRUE	RP11-515E23.1
chr17	ENSG00000261873	cg05817667	rs7213282	SMIM36	-0.0543737	0.00934078	5.84582e-09	0.7871	protein_coding	TRUE	RP11-515E23.1
chr17	ENSG00000261873	cg05778709	rs7213282	SMIM36	0.0390197	0.0074157	1.42682e-07	0.404498	protein_coding	TRUE	RP11-515E23.1
chr17	ENSG00000070731	cg14243899	rs16967307	ST6GALNAC2	-0.0412498	0.00458528	2.33787e-19	0.121261	protein_coding	TRUE	ST6GALNAC2
chr17	ENSG00000070731	cg24321297	rs16967307	ST6GALNAC2	-0.0191643	0.00233296	2.12883e-16	0.526405	protein_coding	TRUE	ST6GALNAC2
chr17	ENSG00000070731	cg16548154	rs16967307	ST6GALNAC2	-0.0164321	0.00212098	9.37685e-15	0.0602637	protein_coding	TRUE	ST6GALNAC2
chr17	ENSG00000070731	cg13664588	rs16967307	ST6GALNAC2	-0.0113058	0.00177146	1.7457e-10	0.482002	protein_coding	TRUE	ST6GALNAC2
chr17	ENSG00000070731	cg19439071	rs16967307	ST6GALNAC2	-0.0150595	0.00245499	8.55786e-10	0.139324	protein_coding	TRUE	ST6GALNAC2
chr17	ENSG00000070731	cg20503109	rs16967307	ST6GALNAC2	-0.0123705	0.0021786	1.3611e-08	0.15869	protein_coding	TRUE	ST6GALNAC2
chr17	ENSG00000070731	cg16905754	rs16967307	ST6GALNAC2	-0.0114383	0.00229737	6.39613e-07	0.268002	protein_coding	TRUE	ST6GALNAC2
chr17	ENSG00000198933	cg02511570	rs7213086	TBKBP1	0.553149	0.0907565	1.09525e-09	0.0625362	protein_coding	TRUE	TBKBP1
chr17	ENSG00000198933	cg08085267	rs7213086	TBKBP1	0.62699	0.10458	2.03097e-09	0.0586904	protein_coding	TRUE	TBKBP1
chr17	ENSG00000198933	cg25173405	rs7213086	TBKBP1	0.296491	0.0526389	1.77569e-08	0.130744	protein_coding	TRUE	TBKBP1
chr17	ENSG00000198933	cg15400028	rs7213086	TBKBP1	0.0796939	0.0152472	1.72486e-07	0.124137	protein_coding	TRUE	TBKBP1
chr17	ENSG00000198933	cg19378624	rs7213086	TBKBP1	0.145811	0.0281289	2.17552e-07	0.175879	protein_coding	TRUE	TBKBP1
chr17	ENSG00000198933	cg27491277	rs7213086	TBKBP1	0.102604	0.0205384	5.8619e-07	0.0627011	protein_coding	TRUE	TBKBP1
chr17	ENSG00000221995	cg11114275	rs8080570	TIAF1	-0.0868918	0.0168618	2.56096e-07	0.575408	protein_coding	TRUE	TIAF1
chr17	ENSG00000221995	cg13672501	rs8080570	TIAF1	0.0653523	0.0131575	6.80212e-07	0.920343	protein_coding	TRUE	TIAF1
chr18	ENSG00000226742	cg18140558	rs75287701	HSBP1L1	-0.10521	0.018015	5.2166e-09	0.909302	protein_coding	TRUE	HSBP1L1
chr18	ENSG00000226742	cg00363486	rs75287701	HSBP1L1	-0.0947977	0.0174522	5.57695e-08	0.996449	protein_coding	TRUE	HSBP1L1
chr18	ENSG00000226742	cg11687085	rs75287701	HSBP1L1	-0.144585	0.0287186	4.78978e-07	0.674754	protein_coding	TRUE	HSBP1L1
chr19	ENSG00000105186	cg21196646	rs10417773	ANKRD27	-0.0551313	0.0107981	3.29684e-07	0.477303	protein_coding	TRUE	ANKRD27
chr19	ENSG00000105507	cg26955996	rs141670933	CABP5	-0.00733554	0.000666597	3.63699e-28	0.161985	protein_coding	TRUE	CABP5
chr19	ENSG00000105507	cg09422355	rs141670933	CABP5	-0.00627725	0.000605969	3.80778e-25	0.546509	protein_coding	TRUE	CABP5
chr19	ENSG00000105507	cg04937172	rs141670933	CABP5	-0.00634633	0.0006747	5.14644e-21	0.160791	protein_coding	TRUE	CABP5
chr19	ENSG00000105507	cg07040712	rs141670933	CABP5	-0.00343308	0.000390849	1.58246e-18	0.579657	protein_coding	TRUE	CABP5
chr19	ENSG00000105507	cg10149529	rs141670933	CABP5	-0.00393205	0.000458248	9.43714e-18	0.428268	protein_coding	TRUE	CABP5
chr19	ENSG00000105507	cg05308117	rs141670933	CABP5	-0.00256463	0.0003512	2.82503e-13	0.183921	protein_coding	TRUE	CABP5
chr19	ENSG00000105507	cg15920400	rs141670933	CABP5	-0.00303724	0.000424356	8.22812e-13	0.289573	protein_coding	TRUE	CABP5
chr19	ENSG00000105507	cg23522194	rs141670933	CABP5	-0.00325078	0.000551667	3.80067e-09	0.197446	protein_coding	TRUE	CABP5
chr19	ENSG00000105507	cg02380983	rs141670933	CABP5	-0.00209998	0.000380019	3.27631e-08	0.597762	protein_coding	TRUE	CABP5
chr19	ENSG00000105507	cg10222789	rs141670933	CABP5	-0.00220001	0.000422004	1.85559e-07	0.08121	protein_coding	TRUE	CABP5
chr19	ENSG00000169393	cg26955996	rs62129082	ELSPBP1	-0.0354631	0.00346328	1.31608e-24	0.0947089	protein_coding	TRUE	ELSPBP1
chr19	ENSG00000169393	cg09422355	rs62129082	ELSPBP1	-0.0300983	0.00312819	6.47826e-22	0.166189	protein_coding	TRUE	ELSPBP1
chr19	ENSG00000169393	cg04937172	rs62129082	ELSPBP1	-0.0313746	0.00341641	4.17252e-20	0.225751	protein_coding	TRUE	ELSPBP1
chr19	ENSG00000169393	cg07040712	rs62129082	ELSPBP1	-0.0169722	0.00196583	5.94277e-18	0.333682	protein_coding	TRUE	ELSPBP1
chr19	ENSG00000169393	cg10149529	rs62129082	ELSPBP1	-0.018947	0.00231151	2.46801e-16	0.235895	protein_coding	TRUE	ELSPBP1
chr19	ENSG00000169393	cg15920400	rs62129082	ELSPBP1	-0.0151581	0.00209809	5.02049e-13	0.135629	protein_coding	TRUE	ELSPBP1
chr19	ENSG00000169393	cg05308117	rs62129082	ELSPBP1	-0.0124145	0.0017464	1.17204e-12	0.384509	protein_coding	TRUE	ELSPBP1
chr19	ENSG00000169393	cg02380983	rs62129082	ELSPBP1	-0.00955456	0.00186976	3.22085e-07	0.0985048	protein_coding	TRUE	ELSPBP1
chr19	ENSG00000267757	cg08831348	rs6509227	EML2-AS1	-0.141753	0.0221385	1.5235e-10	0.152788	lncRNA	TRUE	EML2-AS1
chr19	ENSG00000267757	cg20681708	rs6509227	EML2-AS1	-0.159513	0.0250398	1.88578e-10	0.120628	lncRNA	TRUE	EML2-AS1
chr19	ENSG00000267757	cg18515250	rs6509227	EML2-AS1	-0.117885	0.0231115	3.38411e-07	0.124807	lncRNA	TRUE	EML2-AS1
chr19	ENSG00000129911	cg19687457	rs11666480	KLF16	-0.0543344	0.0084841	1.51104e-10	0.114738	protein_coding	TRUE	KLF16
chr19	ENSG00000129911	cg05970437	rs3746045	KLF16	0.0506977	0.0083149	1.07935e-09	0.078632	protein_coding	TRUE	KLF16
chr19	ENSG00000130669	cg24710020	rs4803212	PAK4	0.274519	0.0453107	1.37311e-09	0.586008	protein_coding	TRUE	PAK4
chr19	ENSG00000269420	cg26955996	rs35439716	PLA2G4C-AS1	-0.108146	0.0122369	9.76948e-19	0.510849	lncRNA	TRUE	PLA2G4C-AS1
chr19	ENSG00000269420	cg09422355	rs35439716	PLA2G4C-AS1	-0.0920806	0.010886	2.70507e-17	0.582553	lncRNA	TRUE	PLA2G4C-AS1
chr19	ENSG00000269420	cg04937172	rs35439716	PLA2G4C-AS1	-0.0966149	0.0117665	2.19352e-16	0.642744	lncRNA	TRUE	PLA2G4C-AS1
chr19	ENSG00000269420	cg07040712	rs35439716	PLA2G4C-AS1	-0.0517173	0.00668176	9.9356e-15	0.758465	lncRNA	TRUE	PLA2G4C-AS1
chr19	ENSG00000269420	cg10149529	rs35439716	PLA2G4C-AS1	-0.0578144	0.00777987	1.07555e-13	0.369732	lncRNA	TRUE	PLA2G4C-AS1
chr19	ENSG00000269420	cg05308117	rs35439716	PLA2G4C-AS1	-0.0379153	0.00574374	4.07978e-11	0.581015	lncRNA	TRUE	PLA2G4C-AS1
chr19	ENSG00000269420	cg15920400	rs35439716	PLA2G4C-AS1	-0.0452454	0.00691326	5.96074e-11	0.568943	lncRNA	TRUE	PLA2G4C-AS1
chr19	ENSG00000269420	cg23522194	rs35439716	PLA2G4C-AS1	-0.0468651	0.00869098	6.95284e-08	0.53993	lncRNA	TRUE	PLA2G4C-AS1
chr2	ENSG00000136717	cg02611153	rs17014938	BIN1	-0.0167637	0.00275502	1.16648e-09	0.142114	protein_coding	TRUE	BIN1
chr2	ENSG00000136717	cg08560184	rs17014938	BIN1	-0.0152637	0.00268403	1.29392e-08	0.235389	protein_coding	TRUE	BIN1
chr2	ENSG00000136717	cg13182602	rs17014938	BIN1	-0.021307	0.00376291	1.49304e-08	0.720556	protein_coding	TRUE	BIN1
chr2	ENSG00000136717	cg13431910	rs17014938	BIN1	-0.0159746	0.00288473	3.06569e-08	0.219293	protein_coding	TRUE	BIN1
chr2	ENSG00000136717	cg11538967	rs17014938	BIN1	-0.0179135	0.00325432	3.70132e-08	0.713816	protein_coding	TRUE	BIN1
chr2	ENSG00000136717	cg06091295	rs17014938	BIN1	-0.0125543	0.00230704	5.27625e-08	0.801635	protein_coding	TRUE	BIN1
chr2	ENSG00000136717	cg07346182	rs17014938	BIN1	-0.0136074	0.00257945	1.32535e-07	0.843395	protein_coding	TRUE	BIN1
chr2	ENSG00000136717	cg06425843	rs17014938	BIN1	-0.012049	0.00233029	2.33339e-07	0.806268	protein_coding	TRUE	BIN1
chr2	ENSG00000115677	cg03650730	rs144426547	HDLBP	-0.0337885	0.00618757	4.74229e-08	0.147918	protein_coding	TRUE	HDLBP
chr2	ENSG00000181798	cg14436272	rs1667319	LINC00471	2.0646	0.336809	8.79414e-10	0.111659	lncRNA	TRUE	LINC00471
chr2	ENSG00000181798	cg06281680	rs28685161	LINC00471	0.311439	0.060596	2.7532e-07	0.185799	lncRNA	TRUE	LINC00471
chr2	ENSG00000181798	cg00143376	rs1667319	LINC00471	0.6081	0.118964	3.19413e-07	0.0870453	lncRNA	TRUE	LINC00471
chr2	ENSG00000162992	cg13818762	rs6709122	NEUROD1	-0.00999385	0.00173489	8.3867e-09	0.29134	protein_coding	TRUE	NEUROD1
chr2	ENSG00000171596	cg14436272	rs12464121	NMUR1	-0.151832	0.0153063	3.42171e-23	0.394949	protein_coding	TRUE	NMUR1
chr2	ENSG00000171596	cg10034588	rs12464121	NMUR1	-0.0941095	0.0103289	8.14287e-20	0.339929	protein_coding	TRUE	NMUR1
chr2	ENSG00000171596	cg00143376	rs12464121	NMUR1	-0.0423681	0.00565359	6.68001e-14	0.911328	protein_coding	TRUE	NMUR1
chr2	ENSG00000162878	cg25276246	rs4952398	PKDCC	-0.0311171	0.00591494	1.43463e-07	0.96873	protein_coding	TRUE	PKDCC
chr2	ENSG00000115350	cg10293909	rs4853082	POLE4	0.291393	0.035385	1.79652e-16	0.209918	protein_coding	TRUE	POLE4
chr2	ENSG00000115350	cg08541846	rs4853082	POLE4	0.0797933	0.011253	1.3332e-12	0.26811	protein_coding	TRUE	POLE4
chr2	ENSG00000115350	cg23692114	rs4853082	POLE4	0.0905197	0.0131068	4.97382e-12	0.178538	protein_coding	TRUE	POLE4
chr2	ENSG00000115350	cg16570455	rs4853082	POLE4	0.0780786	0.0128163	1.11424e-09	0.272339	protein_coding	TRUE	POLE4
chr2	ENSG00000115350	cg15126615	rs4853082	POLE4	0.0603049	0.0108282	2.55812e-08	0.104017	protein_coding	TRUE	POLE4
chr2	ENSG00000115350	cg17569203	rs4853082	POLE4	0.0370959	0.0073362	4.26887e-07	0.136565	protein_coding	TRUE	POLE4
chr2	ENSG00000213639	cg10142500	rs12714243	PPP1CB	0.032875	0.00665669	7.86692e-07	0.761418	protein_coding	TRUE	PPP1CB
chr2	ENSG00000115310	cg09592903	rs2255112	RTN4	-0.00215688	0.00033958	2.13075e-10	0.137239	protein_coding	TRUE	RTN4
chr2	ENSG00000198648	cg03331300	rs6708854	STK39	-0.0321156	0.00429524	7.60208e-14	0.427884	protein_coding	TRUE	STK39
chr2	ENSG00000198648	cg12059950	rs6708854	STK39	-0.0139585	0.00190297	2.21579e-13	0.0940526	protein_coding	TRUE	STK39
chr2	ENSG00000198648	cg07992385	rs6708854	STK39	-0.0138156	0.00190205	3.77186e-13	0.415538	protein_coding	TRUE	STK39
chr2	ENSG00000198648	cg24695024	rs6708854	STK39	-0.0277116	0.00387572	8.67432e-13	0.0770151	protein_coding	TRUE	STK39
chr2	ENSG00000198648	cg19026692	rs6708854	STK39	-0.0179442	0.0026431	1.12848e-11	0.67684	protein_coding	TRUE	STK39
chr2	ENSG00000198648	cg08568260	rs6708854	STK39	0.028258	0.00434338	7.7184e-11	0.167177	protein_coding	TRUE	STK39
chr2	ENSG00000198648	cg11775828	rs6708854	STK39	-0.0155542	0.00255332	1.11679e-09	0.115618	protein_coding	TRUE	STK39
chr2	ENSG00000198648	cg08795597	rs6708854	STK39	0.0154423	0.00262201	3.87401e-09	0.386563	protein_coding	TRUE	STK39
chr2	ENSG00000198648	cg08487618	rs6708854	STK39	-0.0170024	0.00296719	1.00356e-08	0.801283	protein_coding	TRUE	STK39
chr2	ENSG00000198648	cg26872305	rs6708854	STK39	-0.0174343	0.00308727	1.6311e-08	0.184756	protein_coding	TRUE	STK39
chr20	ENSG00000124145	cg22680020	rs2267868	SDC4	-0.0414957	0.00821569	4.40006e-07	0.416073	protein_coding	TRUE	SDC4
chr21	ENSG00000157578	cg12638745	rs73367987	LCA5L	0.536798	0.0885767	1.35898e-09	0.547526	protein_coding	TRUE	LCA5L
chr21	ENSG00000157578	cg11766498	rs73367987	LCA5L	-0.22789	0.0410621	2.85844e-08	0.0712662	protein_coding	TRUE	LCA5L
chr21	ENSG00000157578	cg06148396	rs73367987	LCA5L	-0.276796	0.054576	3.94159e-07	0.215163	protein_coding	TRUE	LCA5L
chr21	ENSG00000157578	cg04418027	rs73367987	LCA5L	-0.189088	0.0381453	7.15779e-07	0.872013	protein_coding	TRUE	LCA5L
chr21	ENSG00000185437	cg06148396	rs77199433	SH3BGR	-0.115844	0.0149483	9.2154e-15	0.159518	protein_coding	TRUE	SH3BGR
chr21	ENSG00000185437	cg15616257	rs77199433	SH3BGR	-0.0674009	0.0101012	2.51352e-11	0.14531	protein_coding	TRUE	SH3BGR
chr21	ENSG00000185437	cg04418027	rs77199433	SH3BGR	-0.0640473	0.010842	3.47699e-09	0.418424	protein_coding	TRUE	SH3BGR
chr21	ENSG00000185437	cg11778840	rs77199433	SH3BGR	-0.0771229	0.0135345	1.21046e-08	0.137916	protein_coding	TRUE	SH3BGR
chr22	ENSG00000099968	cg08559357	rs725769	BCL2L13	0.014758	0.0024412	1.4904e-09	0.618003	protein_coding	TRUE	BCL2L13
chr22	ENSG00000280384	cg05089215	rs135539	FP325332.1	-2.77327	0.532776	1.93664e-07	0.891685	lncRNA	TRUE	RP4-695O20.1
chr22	ENSG00000280384	cg12672222	rs135539	FP325332.1	-1.91275	0.375029	3.39149e-07	0.212948	lncRNA	TRUE	RP4-695O20.1
chr22	ENSG00000280384	cg16803515	rs135539	FP325332.1	-2.12677	0.417691	3.54799e-07	0.49872	lncRNA	TRUE	RP4-695O20.1
chr22	ENSG00000280384	cg07410461	rs135539	FP325332.1	-2.84214	0.559793	3.83207e-07	0.742224	lncRNA	TRUE	RP4-695O20.1
chr22	ENSG00000280384	cg02543147	rs135539	FP325332.1	-2.09148	0.413257	4.17159e-07	0.694685	lncRNA	TRUE	RP4-695O20.1
chr22	ENSG00000280384	cg15184044	rs135539	FP325332.1	-1.66182	0.332009	5.57646e-07	0.780221	lncRNA	TRUE	RP4-695O20.1
chr22	ENSG00000280384	cg23159233	rs135539	FP325332.1	-2.04238	0.411418	6.89715e-07	0.867732	lncRNA	TRUE	RP4-695O20.1
chr22	ENSG00000280384	cg08846053	rs135539	FP325332.1	-2.25651	0.458015	8.36177e-07	0.840947	lncRNA	TRUE	RP4-695O20.1
chr22	ENSG00000186951	cg05089215	rs135549	PPARA	-0.0182511	0.00195044	8.17136e-21	0.327541	protein_coding	TRUE	PPARA
chr22	ENSG00000186951	cg16803515	rs135549	PPARA	-0.01402	0.00159442	1.45438e-18	0.59988	protein_coding	TRUE	PPARA
chr22	ENSG00000186951	cg07410461	rs135549	PPARA	-0.0187546	0.00214727	2.45469e-18	0.553451	protein_coding	TRUE	PPARA
chr22	ENSG00000186951	cg02543147	rs135549	PPARA	-0.0138064	0.00159392	4.64087e-18	0.320806	protein_coding	TRUE	PPARA
chr22	ENSG00000186951	cg08846053	rs135549	PPARA	-0.015702	0.00182146	6.66268e-18	0.281567	protein_coding	TRUE	PPARA
chr22	ENSG00000186951	cg15184044	rs135549	PPARA	-0.0111417	0.00129953	1.00291e-17	0.193155	protein_coding	TRUE	PPARA
chr22	ENSG00000186951	cg12672222	rs135549	PPARA	-0.0117085	0.00145421	8.18211e-16	0.409816	protein_coding	TRUE	PPARA
chr22	ENSG00000186951	cg23159233	rs135549	PPARA	-0.0132226	0.00164582	9.43104e-16	0.502517	protein_coding	TRUE	PPARA
chr22	ENSG00000186951	cg23403084	rs135549	PPARA	-0.0107808	0.00140503	1.68038e-14	0.270787	protein_coding	TRUE	PPARA
chr22	ENSG00000186951	cg12490598	rs135549	PPARA	-0.0107719	0.00154582	3.20548e-12	0.206304	protein_coding	TRUE	PPARA
chr22	ENSG00000186951	cg05691848	rs135549	PPARA	-0.0114392	0.00164715	3.78984e-12	0.477913	protein_coding	TRUE	PPARA
chr22	ENSG00000186951	cg20589873	rs135549	PPARA	-0.00883664	0.00131821	2.03478e-11	0.230534	protein_coding	TRUE	PPARA
chr22	ENSG00000186951	cg24101990	rs135549	PPARA	-0.00990424	0.00151573	6.38998e-11	0.169386	protein_coding	TRUE	PPARA
chr22	ENSG00000186951	cg13252075	rs135549	PPARA	-0.00829235	0.00127023	6.65436e-11	0.594507	protein_coding	TRUE	PPARA
chr22	ENSG00000186951	cg12445256	rs135549	PPARA	-0.00733473	0.00112563	7.21472e-11	0.968741	protein_coding	TRUE	PPARA
chr3	ENSG00000255021	cg16991944	rs9869724	AC093496.1	-0.190639	0.0146133	6.73343e-39	0.0551326	lncRNA	TRUE	RP11-536I6.2
chr3	ENSG00000255021	cg20533576	rs9869724	AC093496.1	-0.121769	0.0103305	4.53724e-32	0.50339	lncRNA	TRUE	RP11-536I6.2
chr3	ENSG00000255021	cg12790627	rs9869724	AC093496.1	-0.090596	0.00802445	1.47049e-29	0.518539	lncRNA	TRUE	RP11-536I6.2
chr3	ENSG00000255021	cg08104207	rs9869724	AC093496.1	-0.0471492	0.00673902	2.62536e-12	0.280083	lncRNA	TRUE	RP11-536I6.2
chr3	ENSG00000255021	cg02555923	rs9869724	AC093496.1	-0.0505057	0.00740034	8.80569e-12	0.178836	lncRNA	TRUE	RP11-536I6.2
chr3	ENSG00000255021	cg13544074	rs9869724	AC093496.1	-0.0312125	0.00577836	6.60388e-08	0.286937	lncRNA	TRUE	RP11-536I6.2
chr3	ENSG00000196776	cg08932533	rs17231503	CD47	-0.00762547	0.000672958	9.1852e-30	0.147404	protein_coding	TRUE	CD47
chr3	ENSG00000196776	cg06806080	rs17231503	CD47	-0.0050356	0.000451207	6.3791e-29	0.140569	protein_coding	TRUE	CD47
chr3	ENSG00000196776	cg03187166	rs17231503	CD47	-0.00632221	0.000571429	1.87844e-28	0.305906	protein_coding	TRUE	CD47
chr3	ENSG00000196776	cg00492070	rs17231503	CD47	-0.00460966	0.000438353	7.30131e-26	0.0868405	protein_coding	TRUE	CD47
chr3	ENSG00000196776	cg12422228	rs17231503	CD47	-0.00432631	0.000422093	1.18744e-24	0.135281	protein_coding	TRUE	CD47
chr3	ENSG00000196776	cg22029806	rs17231503	CD47	-0.00349192	0.000375543	1.42681e-20	0.7474	protein_coding	TRUE	CD47
chr3	ENSG00000196776	cg02487233	rs17231503	CD47	-0.00335634	0.000362028	1.84536e-20	0.110941	protein_coding	TRUE	CD47
chr3	ENSG00000196776	cg11741004	rs17231503	CD47	-0.00329558	0.000382673	7.17884e-18	0.348868	protein_coding	TRUE	CD47
chr3	ENSG00000196776	cg03040360	rs17231503	CD47	0.00108484	0.0001681	1.09274e-10	0.185508	protein_coding	TRUE	CD47
chr3	ENSG00000163913	cg16516295	rs2260840	IFT122	0.133351	0.0224449	2.82872e-09	0.226238	protein_coding	TRUE	IFT122
chr3	ENSG00000163913	cg08049441	rs2260840	IFT122	0.113393	0.0217595	1.87613e-07	0.0856013	protein_coding	TRUE	IFT122
chr3	ENSG00000163913	cg08787647	rs2260840	IFT122	0.11634	0.0230464	4.46323e-07	0.145864	protein_coding	TRUE	IFT122
chr3	ENSG00000177311	cg04352534	rs2871960	ZBTB38	-0.0878426	0.0130801	1.87106e-11	0.818432	protein_coding	TRUE	ZBTB38
chr3	ENSG00000177311	cg11421029	rs2871960	ZBTB38	-0.0711516	0.0108678	5.87049e-11	0.762452	protein_coding	TRUE	ZBTB38
chr3	ENSG00000177311	cg21380154	rs2871960	ZBTB38	-0.0573529	0.00903864	2.21996e-10	0.356892	protein_coding	TRUE	ZBTB38
chr3	ENSG00000177311	cg02936049	rs2871960	ZBTB38	-0.0664893	0.0105408	2.83068e-10	0.44618	protein_coding	TRUE	ZBTB38
chr3	ENSG00000177311	cg03848978	rs2871960	ZBTB38	-0.0484064	0.00794192	1.09398e-09	0.912244	protein_coding	TRUE	ZBTB38
chr3	ENSG00000177311	cg06820102	rs2871960	ZBTB38	-0.0717952	0.012026	2.37254e-09	0.980963	protein_coding	TRUE	ZBTB38
chr3	ENSG00000177311	cg10394922	rs2871960	ZBTB38	-0.0297284	0.00540691	3.83629e-08	0.870824	protein_coding	TRUE	ZBTB38
chr4	ENSG00000071205	cg12971842	rs6535558	ARHGAP10	-0.0270444	0.00403105	1.9593e-11	0.384653	protein_coding	TRUE	ARHGAP10
chr4	ENSG00000071205	cg12654519	rs6535558	ARHGAP10	-0.0137068	0.00222584	7.36569e-10	0.742317	protein_coding	TRUE	ARHGAP10
chr4	ENSG00000071205	cg13845366	rs6535558	ARHGAP10	-0.0231695	0.00385481	1.84925e-09	0.464794	protein_coding	TRUE	ARHGAP10
chr4	ENSG00000071205	cg24290320	rs6535558	ARHGAP10	-0.0300972	0.00605708	6.73251e-07	0.596218	protein_coding	TRUE	ARHGAP10
chr4	ENSG00000124406	cg03640051	rs1460357	ATP8A1	-0.0147063	0.00179128	2.21319e-16	0.413119	protein_coding	TRUE	ATP8A1
chr4	ENSG00000124406	cg15927566	rs1460357	ATP8A1	-0.00862046	0.00116367	1.28219e-13	0.180472	protein_coding	TRUE	ATP8A1
chr4	ENSG00000124406	cg07557423	rs1460357	ATP8A1	-0.0115482	0.00168044	6.32423e-12	0.295214	protein_coding	TRUE	ATP8A1
chr4	ENSG00000124406	cg17280671	rs1460357	ATP8A1	-0.00729539	0.00132271	3.47811e-08	0.392945	protein_coding	TRUE	ATP8A1
chr4	ENSG00000181004	cg10495464	rs394751	BBS12	-0.0971328	0.0127668	2.77902e-14	0.131723	protein_coding	TRUE	BBS12
chr4	ENSG00000164323	cg01881046	rs3108296	CFAP97	-0.0783389	0.00607464	4.73744e-38	0.769429	protein_coding	TRUE	CFAP97
chr4	ENSG00000164323	cg08240002	rs3108296	CFAP97	-0.0923007	0.00725278	4.22651e-37	0.871243	protein_coding	TRUE	CFAP97
chr4	ENSG00000164323	cg12836958	rs3108296	CFAP97	-0.0469665	0.0041933	4.06061e-29	0.884781	protein_coding	TRUE	CFAP97
chr4	ENSG00000164323	cg21907850	rs3108296	CFAP97	-0.0319916	0.00300903	2.1187e-26	0.612143	protein_coding	TRUE	CFAP97
chr4	ENSG00000164323	cg15478081	rs3108296	CFAP97	-0.0238276	0.00293406	4.62277e-16	0.98508	protein_coding	TRUE	CFAP97
chr4	ENSG00000164323	cg17998594	rs3108296	CFAP97	-0.0236418	0.00325441	3.74286e-13	0.511459	protein_coding	TRUE	CFAP97
chr4	ENSG00000164323	cg02207086	rs3108296	CFAP97	-0.0218246	0.00381171	1.03025e-08	0.357586	protein_coding	TRUE	CFAP97
chr4	ENSG00000109472	cg01925521	rs13110854	CPE	-0.0036741	0.000723257	3.77566e-07	0.076221	protein_coding	TRUE	CPE
chr4	ENSG00000163293	cg26178657	rs76552755	NIPAL1	-0.188145	0.0221918	2.28817e-17	0.349545	protein_coding	TRUE	NIPAL1
chr4	ENSG00000250317	cg18478667	rs2305670	SMIM20	-0.0780636	0.0151383	2.51346e-07	0.114418	protein_coding	TRUE	SMIM20
chr4	ENSG00000109762	cg01881046	rs3108243	SNX25	-0.0731889	0.00586806	1.05572e-35	0.96445	protein_coding	TRUE	SNX25
chr4	ENSG00000109762	cg08240002	rs3108243	SNX25	-0.0865394	0.00698255	2.82839e-35	0.849183	protein_coding	TRUE	SNX25
chr4	ENSG00000109762	cg12836958	rs3108243	SNX25	-0.0441431	0.00400295	2.81143e-28	0.962928	protein_coding	TRUE	SNX25
chr4	ENSG00000109762	cg21907850	rs3108243	SNX25	-0.030187	0.0028601	4.84029e-26	0.875048	protein_coding	TRUE	SNX25
chr4	ENSG00000109762	cg15478081	rs3108243	SNX25	-0.0220021	0.00278391	2.71634e-15	0.63234	protein_coding	TRUE	SNX25
chr4	ENSG00000109762	cg17998594	rs3108243	SNX25	-0.0225128	0.00305456	1.70357e-13	0.782206	protein_coding	TRUE	SNX25
chr4	ENSG00000109762	cg02207086	rs3108243	SNX25	-0.0204963	0.00357566	9.91449e-09	0.113397	protein_coding	TRUE	SNX25
chr4	ENSG00000173011	cg06697600	rs9986037	TADA2B	0.0785842	0.0111742	2.02681e-12	0.599409	protein_coding	TRUE	TADA2B
chr4	ENSG00000173011	cg02503808	rs9986037	TADA2B	-0.079217	0.0114468	4.50166e-12	0.36658	protein_coding	TRUE	TADA2B
chr4	ENSG00000173011	cg26116260	rs9986037	TADA2B	-0.051897	0.00751648	5.0404e-12	0.651435	protein_coding	TRUE	TADA2B
chr4	ENSG00000173011	cg19539972	rs9986037	TADA2B	-0.0523301	0.00822332	1.97047e-10	0.353757	protein_coding	TRUE	TADA2B
chr4	ENSG00000173011	cg23757056	rs9986037	TADA2B	-0.0900281	0.0173691	2.18062e-07	0.63002	protein_coding	TRUE	TADA2B
chr4	ENSG00000173011	cg17480221	rs9986037	TADA2B	-0.0486878	0.00951133	3.07276e-07	0.602578	protein_coding	TRUE	TADA2B
chr4	ENSG00000173011	cg24709285	rs9986037	TADA2B	-0.0387106	0.00784148	7.94785e-07	0.173623	protein_coding	TRUE	TADA2B
chr4	ENSG00000109775	cg06277849	rs4862524	UFSP2	0.0228799	0.00454326	4.75366e-07	0.892892	protein_coding	TRUE	UFSP2
chr4	ENSG00000182168	cg12468008	rs1385668	UNC5C	-0.0954275	0.0161092	3.14614e-09	0.371985	protein_coding	TRUE	UNC5C
chr4	ENSG00000182168	cg13467274	rs1385668	UNC5C	-0.0806197	0.0152077	1.15022e-07	0.664357	protein_coding	TRUE	UNC5C
chr4	ENSG00000182168	cg24386507	rs1385668	UNC5C	-0.0557628	0.0110709	4.73225e-07	0.60781	protein_coding	TRUE	UNC5C
chr5	ENSG00000173210	cg27543327	rs70973510	ABLIM3	-0.0405566	0.00671983	1.58608e-09	0.307971	protein_coding	TRUE	ABLIM3
chr5	ENSG00000173210	cg23518039	rs70973510	ABLIM3	-0.0250087	0.00481874	2.10426e-07	0.244758	protein_coding	TRUE	ABLIM3
chr5	ENSG00000173210	cg06539116	rs70973510	ABLIM3	0.0123086	0.00242833	4.00476e-07	0.365866	protein_coding	TRUE	ABLIM3
chr5	ENSG00000253406	cg27543327	rs748066	AC012613.2	0.11099	0.0114562	3.3858e-22	0.127009	lncRNA	TRUE	AC012613.2
chr5	ENSG00000253406	cg23518039	rs748066	AC012613.2	0.0732528	0.00952191	1.43637e-14	0.941884	lncRNA	TRUE	AC012613.2
chr5	ENSG00000253406	cg06539116	rs748066	AC012613.2	-0.035291	0.00489769	5.77704e-13	0.783866	lncRNA	TRUE	AC012613.2
chr5	ENSG00000253406	cg11649167	rs748066	AC012613.2	0.0381361	0.0072215	1.28539e-07	0.230897	lncRNA	TRUE	AC012613.2
chr5	ENSG00000253406	cg17593055	rs748066	AC012613.2	0.0276345	0.00558845	7.61666e-07	0.866052	lncRNA	TRUE	AC012613.2
chr5	ENSG00000197043	cg10610249	rs10039049	ANXA6	-0.0124732	0.00188287	3.48201e-11	0.447826	protein_coding	TRUE	ANXA6
chr5	ENSG00000197043	cg18060909	rs10039049	ANXA6	-0.0168792	0.00258432	6.51671e-11	0.826658	protein_coding	TRUE	ANXA6
chr5	ENSG00000197043	cg25408093	rs10039049	ANXA6	-0.0102179	0.00167377	1.02988e-09	0.932936	protein_coding	TRUE	ANXA6
chr5	ENSG00000197043	cg15931138	rs10039049	ANXA6	-0.0100967	0.00189017	9.20848e-08	0.245862	protein_coding	TRUE	ANXA6
chr5	ENSG00000164327	cg05015628	rs13184911	RICTOR	-0.0113532	0.00152245	8.83669e-14	0.141896	protein_coding	TRUE	RICTOR
chr5	ENSG00000164327	cg04869206	rs13184911	RICTOR	0.00824459	0.00134841	9.69886e-10	0.936545	protein_coding	TRUE	RICTOR
chr5	ENSG00000164327	cg24571930	rs13184911	RICTOR	-0.00807419	0.00143842	1.98595e-08	0.127503	protein_coding	TRUE	RICTOR
chr6	ENSG00000188107	cg23176759	rs2812772	EYS	-0.00936726	0.00140403	2.52838e-11	0.314545	protein_coding	TRUE	EYS
chr6	ENSG00000161896	cg16137773	rs791904	IP6K3	-0.134542	0.0194206	4.27405e-12	0.393269	protein_coding	TRUE	IP6K3
chr6	ENSG00000161896	cg16066008	rs791904	IP6K3	-0.162264	0.0250251	8.92798e-11	0.226131	protein_coding	TRUE	IP6K3
chr6	ENSG00000161896	cg15808668	rs791904	IP6K3	-0.135783	0.0237852	1.1383e-08	0.567431	protein_coding	TRUE	IP6K3
chr6	ENSG00000161896	cg16204066	rs791904	IP6K3	0.130387	0.0244376	9.52897e-08	0.694149	protein_coding	TRUE	IP6K3
chr6	ENSG00000161896	cg06844074	rs791904	IP6K3	0.110661	0.0208716	1.14536e-07	0.0861088	protein_coding	TRUE	IP6K3
chr6	ENSG00000161896	cg11545871	rs791904	IP6K3	-0.110716	0.0210964	1.53665e-07	0.253169	protein_coding	TRUE	IP6K3
chr6	ENSG00000161896	cg09026787	rs791904	IP6K3	-0.0819385	0.0156334	1.59487e-07	0.781288	protein_coding	TRUE	IP6K3
chr6	ENSG00000007866	cg12029281	rs7744287	TEAD3	-0.0235027	0.00470777	5.96609e-07	0.471562	protein_coding	TRUE	TEAD3
chr6	ENSG00000007866	cg23927571	rs7744287	TEAD3	-0.0297354	0.00599552	7.06345e-07	0.671469	protein_coding	TRUE	TEAD3
chr6	ENSG00000130338	cg23877497	rs262820	TULP4	-0.0491728	0.00790566	4.97329e-10	0.242537	protein_coding	TRUE	TULP4
chr6	ENSG00000137288	cg16066008	rs10672	UQCC2	-0.0291108	0.00409228	1.13074e-12	0.325094	protein_coding	TRUE	UQCC2
chr6	ENSG00000137288	cg15251311	rs10672	UQCC2	-0.0169853	0.00277561	9.3889e-10	0.114112	protein_coding	TRUE	UQCC2
chr6	ENSG00000137288	cg16137773	rs10672	UQCC2	-0.0194455	0.00323138	1.76926e-09	0.115575	protein_coding	TRUE	UQCC2
chr6	ENSG00000137288	cg00310728	rs10672	UQCC2	-0.0157612	0.00298334	1.27038e-07	0.0545735	protein_coding	TRUE	UQCC2
chr6	ENSG00000137288	cg11545871	rs10672	UQCC2	-0.0175989	0.00338125	1.94152e-07	0.667117	protein_coding	TRUE	UQCC2
chr6	ENSG00000137288	cg10714061	rs10672	UQCC2	-0.0129583	0.00257262	4.72839e-07	0.219018	protein_coding	TRUE	UQCC2
chr6	ENSG00000137288	cg15808668	rs10672	UQCC2	-0.0193193	0.00385536	5.41386e-07	0.0776684	protein_coding	TRUE	UQCC2
chr6	ENSG00000137288	cg18836576	rs2229643	UQCC2	-0.0356598	0.00718138	6.84909e-07	0.470135	protein_coding	TRUE	UQCC2
chr7	ENSG00000136261	cg03804248	rs706029	BZW2	-0.0389369	0.00743139	1.60999e-07	0.304903	protein_coding	TRUE	BZW2
chr7	ENSG00000136261	cg25483749	rs706029	BZW2	-0.0225956	0.00436971	2.32901e-07	0.49994	protein_coding	TRUE	BZW2
chr7	ENSG00000164818	cg24796726	rs113101459	DNAAF5	0.174346	0.0337483	2.39064e-07	0.123547	protein_coding	TRUE	DNAAF5
chr7	ENSG00000126870	cg01302119	rs842694	DYNC2I1	-0.0180569	0.00345942	1.79269e-07	0.391897	protein_coding	TRUE	WDR60
chr7	ENSG00000106348	cg11742189	rs144398561	IMPDH1	-0.0221346	0.00390648	1.46071e-08	0.725783	protein_coding	TRUE	IMPDH1
chr7	ENSG00000122778	cg12483292	rs540649	KIAA1549	0.130728	0.0241886	6.49846e-08	0.368004	protein_coding	TRUE	KIAA1549
chr7	ENSG00000225329	cg14205632	rs11561931	LHFPL3-AS2	-0.368844	0.0700014	1.37099e-07	0.962972	lncRNA	TRUE	LHFPL3-AS2
chr7	ENSG00000225329	cg08968200	rs11561931	LHFPL3-AS2	-0.578249	0.110923	1.85758e-07	0.687233	lncRNA	TRUE	LHFPL3-AS2
chr8	ENSG00000120910	cg07622412	rs60918318	PPP3CC	-0.0287394	0.00559785	2.83633e-07	0.813573	protein_coding	TRUE	PPP3CC
chr8	ENSG00000120910	cg23872081	rs60918318	PPP3CC	0.0234331	0.00459339	3.37018e-07	0.218569	protein_coding	TRUE	PPP3CC
chr8	ENSG00000120910	cg13179716	rs60918318	PPP3CC	0.0197821	0.00389402	3.77199e-07	0.669206	protein_coding	TRUE	PPP3CC
chr8	ENSG00000183638	cg26101170	rs4841407	RP1L1	-0.015483	0.00222851	3.71365e-12	0.892452	protein_coding	TRUE	RP1L1
chr8	ENSG00000183638	cg26224715	rs4841407	RP1L1	-0.0136386	0.0019958	8.279e-12	0.896295	protein_coding	TRUE	RP1L1
chr8	ENSG00000183638	cg27411982	rs4841407	RP1L1	0.00275504	0.000424001	8.15433e-11	0.777248	protein_coding	TRUE	RP1L1
chr8	ENSG00000183638	cg20213479	rs4841407	RP1L1	-0.00423119	0.000742769	1.22284e-08	0.737871	protein_coding	TRUE	RP1L1
chr8	ENSG00000183638	cg16847396	rs4841407	RP1L1	-0.00432362	0.000764908	1.58158e-08	0.831589	protein_coding	TRUE	RP1L1
chr8	ENSG00000183638	cg11902992	rs4841407	RP1L1	-0.00529383	0.000938699	1.705e-08	0.0672639	protein_coding	TRUE	RP1L1
chr8	ENSG00000183638	cg02724490	rs4841407	RP1L1	-0.00471871	0.000862116	4.41474e-08	0.495408	protein_coding	TRUE	RP1L1
chr8	ENSG00000183638	cg12177456	rs4841407	RP1L1	-0.00506213	0.000926271	4.62752e-08	0.615236	protein_coding	TRUE	RP1L1
chr8	ENSG00000183638	cg16517559	rs4841407	RP1L1	-0.00696077	0.00136551	3.4406e-07	0.259559	protein_coding	TRUE	RP1L1
chr9	ENSG00000262075	cg14774860	rs28595751	DKFZP434A062	0.0208442	0.00332325	3.55947e-10	0.171817	lncRNA	TRUE	DKFZP434A062
chr9	ENSG00000130723	cg04055528	rs2994040	PRRC2B	-0.0174211	0.00238076	2.5272e-13	0.142994	protein_coding	TRUE	PRRC2B
chr9	ENSG00000130723	cg21178711	rs2994040	PRRC2B	-0.0149433	0.00207592	6.09261e-13	0.760707	protein_coding	TRUE	PRRC2B
chr9	ENSG00000130723	cg15546324	rs2994040	PRRC2B	-0.0101881	0.0015459	4.38744e-11	0.101483	protein_coding	TRUE	PRRC2B
chr9	ENSG00000130723	cg14335029	rs2994040	PRRC2B	-0.00923282	0.00150191	7.87738e-10	0.288429	protein_coding	TRUE	PRRC2B
chr9	ENSG00000130723	cg14953650	rs2994040	PRRC2B	-0.0102152	0.00201731	4.11047e-07	0.183744	protein_coding	TRUE	PRRC2B
chr9	ENSG00000165661	cg07405163	rs35244336	QSOX2	-0.394994	0.0644517	8.86948e-10	0.726691	protein_coding	TRUE	QSOX2
chr9	ENSG00000165661	cg16223770	rs35244336	QSOX2	-0.116722	0.0206557	1.59683e-08	0.797424	protein_coding	TRUE	QSOX2
chr9	ENSG00000165661	cg05348436	rs35244336	QSOX2	-0.0887642	0.0180658	8.95228e-07	0.440096	protein_coding	TRUE	QSOX2
chr9	ENSG00000136854	cg09126156	rs2287116	STXBP1	-0.00344643	0.000518557	3.00746e-11	0.986326	protein_coding	TRUE	STXBP1
chr9	ENSG00000136854	cg07023135	rs2287116	STXBP1	-0.00431304	0.000822704	1.58406e-07	0.676495	protein_coding	TRUE	STXBP1
chr9	ENSG00000136854	cg00552574	rs2287116	STXBP1	-0.00516304	0.00101166	3.33325e-07	0.986697	protein_coding	TRUE	STXBP1
chr9	ENSG00000119139	cg14172428	rs7850573	TJP2	-0.00774901	0.00116065	2.44832e-11	0.625308	protein_coding	TRUE	TJP2
chr9	ENSG00000119139	cg05074215	rs7850573	TJP2	-0.00582184	0.000889118	5.83562e-11	0.454643	protein_coding	TRUE	TJP2
chr9	ENSG00000119139	cg14282632	rs7850573	TJP2	-0.0068249	0.00106611	1.53657e-10	0.993037	protein_coding	TRUE	TJP2
chr9	ENSG00000119139	cg13920460	rs7850573	TJP2	-0.00750129	0.00117762	1.89203e-10	0.509184	protein_coding	TRUE	TJP2
chr9	ENSG00000119139	cg08006708	rs7850573	TJP2	-0.00768216	0.00121532	2.59708e-10	0.912708	protein_coding	TRUE	TJP2
chr9	ENSG00000119139	cg07414392	rs7850573	TJP2	-0.00551873	0.000919065	1.91661e-09	0.384742	protein_coding	TRUE	TJP2
chr9	ENSG00000119139	cg06607140	rs7850573	TJP2	-0.0054674	0.00096237	1.33769e-08	0.254872	protein_coding	TRUE	TJP2
chr9	ENSG00000119139	cg20477011	rs7850573	TJP2	-0.00720896	0.00132945	5.87617e-08	0.111323	protein_coding	TRUE	TJP2
chr9	ENSG00000119139	cg06097859	rs7850573	TJP2	-0.00539935	0.00105515	3.10168e-07	0.233573	protein_coding	TRUE	TJP2

## Sheet: E2M_SMR_Loops
Chr	exposure	trait	top_snp	Gene	bxy	bxy_se	bxy_pval	heidi_pval	Biotype	HEIDI_Pvalue_Significant	Target gene based on loops
chr1	ENSG00000081248	cg08885800	rs2057580	CACNA1S	-0.311028	0.0471374	4.15777e-11	0.842221	protein_coding	TRUE	CACNA1S
chr1	ENSG00000081248	cg17766148	rs2057580	CACNA1S	-0.255523	0.0417215	9.09745e-10	0.570959	protein_coding	TRUE	CACNA1S
chr1	ENSG00000081248	cg12527475	rs2057580	CACNA1S	-0.196251	0.0330543	2.89868e-09	0.933953	protein_coding	TRUE	CACNA1S
chr1	ENSG00000081248	cg23594461	rs2057580	CACNA1S	-0.13701	0.0235894	6.31739e-09	0.810671	protein_coding	TRUE	CACNA1S
chr1	ENSG00000237975	cg24529535	rs34372395	FLG-AS1	0.233406	0.0375583	5.14902e-10	0.0883096	lncRNA	TRUE	FLG-AS1
chr1	ENSG00000237975	cg13498757	rs34372395	FLG-AS1	-0.377104	0.0631819	2.39376e-09	0.22758	lncRNA	TRUE	FLG-AS1
chr1	ENSG00000237975	cg18273593	rs34372395	FLG-AS1	0.166314	0.0307229	6.18617e-08	0.527037	lncRNA	TRUE	FLG-AS1
chr1	ENSG00000237975	cg00888758	rs34372395	FLG-AS1	0.194708	0.0364151	8.9476e-08	0.2116	lncRNA	TRUE	FLG-AS1
chr1	ENSG00000162669	cg27594756	rs17131429	HFM1	0.0961226	0.0124668	1.25528e-14	0.165623	protein_coding	TRUE	HFM1
chr1	ENSG00000162669	cg10890233	rs17131429	HFM1	0.0790239	0.0125036	2.61369e-10	0.0816259	protein_coding	TRUE	HFM1
chr1	ENSG00000162669	cg09737265	rs17131429	HFM1	-0.0668578	0.0107583	5.14758e-10	0.650853	protein_coding	TRUE	HFM1
chr1	ENSG00000162669	cg09077757	rs17131429	HFM1	-0.0795177	0.0161559	8.57079e-07	0.138298	protein_coding	TRUE	HFM1
chr1	ENSG00000117154	cg11232944	rs12759956	IGSF21	0.136842	0.0197711	4.47502e-12	0.165346	protein_coding	TRUE	IGSF21
chr1	ENSG00000117154	cg09390181	rs12759956	IGSF21	0.0793867	0.0154102	2.58315e-07	0.136892	protein_coding	TRUE	IGSF21
chr1	ENSG00000117154	cg06163573	rs12759956	IGSF21	-0.0645082	0.0126582	3.46601e-07	0.149003	protein_coding	TRUE	IGSF21
chr1	ENSG00000081277	cg19764279	rs57522319	PKP1	-0.0235495	0.00372677	2.63255e-10	0.310785	protein_coding	TRUE	PKP1
chr1	ENSG00000081277	cg07189167	rs56287879	PKP1	-0.00878547	0.00143642	9.58216e-10	0.743488	protein_coding	TRUE	PKP1
chr1	ENSG00000081277	cg07302580	rs57522319	PKP1	-0.00709422	0.00125195	1.45706e-08	0.618971	protein_coding	TRUE	PKP1
chr1	ENSG00000081277	cg26066583	rs56287879	PKP1	-0.00657768	0.00119842	4.05077e-08	0.646278	protein_coding	TRUE	PKP1
chr1	ENSG00000081277	cg02855983	rs56287879	PKP1	-0.00531133	0.000986726	7.33429e-08	0.954734	protein_coding	TRUE	PKP1
chr1	ENSG00000081277	cg16819028	rs56287879	PKP1	-0.00785674	0.0014981	1.56734e-07	0.218186	protein_coding	TRUE	PKP1
chr1	ENSG00000081277	cg12611449	rs56287879	PKP1	-0.00528625	0.00103308	3.10476e-07	0.956296	protein_coding	TRUE	PKP1
chr1	ENSG00000081277	cg04904030	rs56287879	PKP1	-0.00366354	0.000731434	5.47942e-07	0.929216	protein_coding	TRUE	PKP1
chr1	ENSG00000081277	cg05184311	rs56287879	PKP1	-0.0037542	0.000751541	5.87338e-07	0.447739	protein_coding	TRUE	PKP1
chr10	ENSG00000120594	cg07534516	rs6482066	PLXDC2	-0.0116648	0.00122683	1.94315e-21	0.169138	protein_coding	TRUE	PLXDC2
chr10	ENSG00000120594	cg27401333	rs6482066	PLXDC2	-0.0111577	0.00138266	7.04691e-16	0.122713	protein_coding	TRUE	PLXDC2
chr10	ENSG00000120594	cg14024017	rs6482066	PLXDC2	-0.00886938	0.00114432	9.13473e-15	0.251064	protein_coding	TRUE	PLXDC2
chr10	ENSG00000120594	cg12723985	rs6482066	PLXDC2	-0.00806253	0.00110206	2.55725e-13	0.251556	protein_coding	TRUE	PLXDC2
chr10	ENSG00000120594	cg03898108	rs6482066	PLXDC2	-0.00736912	0.00102249	5.7187e-13	0.301635	protein_coding	TRUE	PLXDC2
chr10	ENSG00000120594	cg15657225	rs6482066	PLXDC2	0.00347872	0.00049506	2.11213e-12	0.0941345	protein_coding	TRUE	PLXDC2
chr10	ENSG00000120594	cg03631457	rs6482066	PLXDC2	-0.00697804	0.00110428	2.63116e-10	0.308269	protein_coding	TRUE	PLXDC2
chr11	ENSG00000150764	cg13897783	rs5794769	DIXDC1	0.116297	0.0215241	6.5497e-08	0.210095	protein_coding	TRUE	DIXDC1
chr11	ENSG00000023171	cg09612920	rs2846310	GRAMD1B	-0.00520539	0.00100121	2.00275e-07	0.921182	protein_coding	TRUE	GRAMD1B
chr11	ENSG00000023171	cg12728690	rs2846310	GRAMD1B	-0.00781366	0.0015287	3.19935e-07	0.766475	protein_coding	TRUE	GRAMD1B
chr11	ENSG00000023171	cg24961445	rs17127435	GRAMD1B	-0.00692937	0.00137253	4.45023e-07	0.262301	protein_coding	TRUE	GRAMD1B
chr11	ENSG00000023171	cg13709043	rs17127435	GRAMD1B	-0.0114652	0.00231881	7.63653e-07	0.149564	protein_coding	TRUE	GRAMD1B
chr11	ENSG00000148948	cg03818576	rs998447	LRRC4C	-0.0402095	0.00532119	4.14154e-14	0.291717	protein_coding	TRUE	LRRC4C
chr11	ENSG00000148948	cg26553513	rs998447	LRRC4C	-0.033792	0.00537338	3.19967e-10	0.0690928	protein_coding	TRUE	LRRC4C
chr11	ENSG00000030066	cg15024177	rs10838773	NUP160	-0.0825479	0.0165356	5.97174e-07	0.25297	protein_coding	TRUE	NUP160
chr12	ENSG00000090615	cg09537870	rs61952781	GOLGA3	-0.0214885	0.00249766	7.73504e-18	0.786187	protein_coding	TRUE	GOLGA3
chr12	ENSG00000090615	cg10388270	rs61952781	GOLGA3	-0.0238694	0.00284165	4.47096e-17	0.352894	protein_coding	TRUE	GOLGA3
chr12	ENSG00000090615	cg02243221	rs61952781	GOLGA3	-0.0215531	0.00258698	7.99122e-17	0.552128	protein_coding	TRUE	GOLGA3
chr12	ENSG00000090615	cg22149555	rs61952781	GOLGA3	-0.0188929	0.00226978	8.52879e-17	0.643334	protein_coding	TRUE	GOLGA3
chr12	ENSG00000090615	cg16020270	rs61952781	GOLGA3	-0.0170709	0.00206156	1.22592e-16	0.52996	protein_coding	TRUE	GOLGA3
chr12	ENSG00000090615	cg05614952	rs61952781	GOLGA3	-0.0252647	0.00307341	2.02794e-16	0.344292	protein_coding	TRUE	GOLGA3
chr12	ENSG00000090615	cg23470262	rs61952781	GOLGA3	-0.0180112	0.00222455	5.65477e-16	0.368836	protein_coding	TRUE	GOLGA3
chr12	ENSG00000090615	cg23058246	rs61952781	GOLGA3	-0.0219405	0.00272213	7.62657e-16	0.551709	protein_coding	TRUE	GOLGA3
chr12	ENSG00000090615	cg03425615	rs61952781	GOLGA3	-0.0215559	0.00268278	9.36522e-16	0.87903	protein_coding	TRUE	GOLGA3
chr12	ENSG00000090615	cg08695912	rs61952781	GOLGA3	-0.0181245	0.00234449	1.06968e-14	0.801153	protein_coding	TRUE	GOLGA3
chr12	ENSG00000090615	cg13046214	rs61952781	GOLGA3	-0.0231457	0.00307932	5.62623e-14	0.805386	protein_coding	TRUE	GOLGA3
chr12	ENSG00000090615	cg07052262	rs61952781	GOLGA3	-0.0145623	0.00198184	2.01374e-13	0.783899	protein_coding	TRUE	GOLGA3
chr12	ENSG00000090615	cg20765580	rs61952781	GOLGA3	-0.0137839	0.00188832	2.8866e-13	0.809275	protein_coding	TRUE	GOLGA3
chr12	ENSG00000090615	cg19837214	rs61952781	GOLGA3	-0.0101366	0.00144647	2.42066e-12	0.946832	protein_coding	TRUE	GOLGA3
chr12	ENSG00000090615	cg16120883	rs61952781	GOLGA3	-0.0177076	0.00253965	3.11447e-12	0.795096	protein_coding	TRUE	GOLGA3
chr12	ENSG00000090615	cg03538318	rs61952781	GOLGA3	-0.0115405	0.00175664	5.04399e-11	0.452185	protein_coding	TRUE	GOLGA3
chr12	ENSG00000090615	cg22844555	rs61952781	GOLGA3	-0.00969468	0.00148632	6.90952e-11	0.668715	protein_coding	TRUE	GOLGA3
chr12	ENSG00000090615	cg08424446	rs61952781	GOLGA3	-0.0152182	0.00234156	8.07617e-11	0.957843	protein_coding	TRUE	GOLGA3
chr12	ENSG00000090615	cg05625100	rs61952781	GOLGA3	-0.0227841	0.00363581	3.69058e-10	0.0932526	protein_coding	TRUE	GOLGA3
chr12	ENSG00000090615	cg16214937	rs61952781	GOLGA3	-0.0107734	0.00173434	5.23794e-10	0.5407	protein_coding	TRUE	GOLGA3
chr12	ENSG00000090615	cg14903202	rs61952781	GOLGA3	-0.00940278	0.0015814	2.75034e-09	0.556391	protein_coding	TRUE	GOLGA3
chr12	ENSG00000090615	cg09904296	rs61952781	GOLGA3	0.0067151	0.00117574	1.12069e-08	0.453104	protein_coding	TRUE	GOLGA3
chr12	ENSG00000090615	cg08409956	rs61952781	GOLGA3	-0.0109316	0.00193257	1.54475e-08	0.786602	protein_coding	TRUE	GOLGA3
chr12	ENSG00000090615	cg03279164	rs61952781	GOLGA3	-0.00754665	0.00134434	1.981e-08	0.594191	protein_coding	TRUE	GOLGA3
chr12	ENSG00000090615	cg14949892	rs61952781	GOLGA3	-0.0102266	0.00186963	4.50403e-08	0.610201	protein_coding	TRUE	GOLGA3
chr12	ENSG00000090615	cg12532141	rs61952781	GOLGA3	-0.00564174	0.00108684	2.09224e-07	0.654012	protein_coding	TRUE	GOLGA3
chr12	ENSG00000090615	cg15108326	rs61952781	GOLGA3	-0.00866498	0.00167444	2.28073e-07	0.904989	protein_coding	TRUE	GOLGA3
chr12	ENSG00000090615	cg16300310	rs61952781	GOLGA3	-0.00794947	0.00155011	2.92339e-07	0.709114	protein_coding	TRUE	GOLGA3
chr12	ENSG00000090615	cg14168939	rs61952781	GOLGA3	-0.00794493	0.00158489	5.36114e-07	0.693391	protein_coding	TRUE	GOLGA3
chr12	ENSG00000090615	cg23149010	rs61952781	GOLGA3	-0.00604277	0.00121018	5.93674e-07	0.699473	protein_coding	TRUE	GOLGA3
chr12	ENSG00000110906	cg16434195	rs11611012	KCTD10	-0.0370132	0.00455597	4.5067e-16	0.190494	protein_coding	TRUE	KCTD10
chr12	ENSG00000110906	cg14859365	rs11611012	KCTD10	0.0670393	0.0111843	2.04686e-09	0.100927	protein_coding	TRUE	KCTD10
chr12	ENSG00000110906	cg07719172	rs11611012	KCTD10	-0.0433223	0.00755243	9.68182e-09	0.625677	protein_coding	TRUE	KCTD10
chr12	ENSG00000167553	cg00757327	rs1476138	TUBA1C	0.135756	0.0247559	4.1635e-08	0.0561142	protein_coding	TRUE	TUBA1C
chr12	ENSG00000167553	cg08136938	rs1476138	TUBA1C	0.177436	0.0360876	8.797e-07	0.0634934	protein_coding	TRUE	TUBA1C
chr13	ENSG00000183098	cg17351439	rs1577099	GPC6	-0.0763129	0.010738	1.18737e-12	0.715925	protein_coding	TRUE	GPC6
chr13	ENSG00000136141	cg00191181	rs118094856	LRCH1	-0.0934403	0.0119253	4.67036e-15	0.41258	protein_coding	TRUE	LRCH1
chr13	ENSG00000136141	cg17920789	rs118094856	LRCH1	-0.0731737	0.00963626	3.11196e-14	0.407863	protein_coding	TRUE	LRCH1
chr13	ENSG00000136141	cg08005604	rs118094856	LRCH1	-0.126988	0.0170625	9.87734e-14	0.59336	protein_coding	TRUE	LRCH1
chr13	ENSG00000136141	cg06650250	rs118094856	LRCH1	-0.075003	0.0122848	1.02582e-09	0.63806	protein_coding	TRUE	LRCH1
chr13	ENSG00000172915	cg08520986	rs9574068	NBEA	-0.0195926	0.0038911	4.77275e-07	0.380037	protein_coding	TRUE	NBEA
chr14	ENSG00000066629	cg26180015	rs11625037	EML1	-0.0564643	0.00986274	1.03424e-08	0.620228	protein_coding	TRUE	EML1
chr14	ENSG00000066629	cg08669673	rs11625037	EML1	-0.0457343	0.0084766	6.83871e-08	0.653147	protein_coding	TRUE	EML1
chr14	ENSG00000066629	cg01811583	rs11625037	EML1	-0.029895	0.005677	1.39432e-07	0.653135	protein_coding	TRUE	EML1
chr14	ENSG00000066629	cg13725826	rs11625037	EML1	-0.0460678	0.00899962	3.07379e-07	0.429083	protein_coding	TRUE	EML1
chr14	ENSG00000080823	cg02225520	rs7152627	MOK	-0.00198514	0.000270825	2.30187e-13	0.5979	protein_coding	TRUE	MOK
chr14	ENSG00000080823	cg16781161	rs7152627	MOK	-0.00223335	0.000381715	4.89131e-09	0.893655	protein_coding	TRUE	MOK
chr14	ENSG00000080823	cg19611300	rs7152627	MOK	-0.00404661	0.000718546	1.78481e-08	0.138759	protein_coding	TRUE	MOK
chr14	ENSG00000080823	cg19441646	rs7152627	MOK	-0.00210627	0.000402272	1.64144e-07	0.183418	protein_coding	TRUE	MOK
chr14	ENSG00000080823	cg10557552	rs7152627	MOK	-0.00151137	0.000306995	8.51795e-07	0.533202	protein_coding	TRUE	MOK
chr14	ENSG00000080823	cg16091920	rs7152627	MOK	-0.00141446	0.000287804	8.89409e-07	0.304085	protein_coding	TRUE	MOK
chr15	ENSG00000140575	cg22089800	rs2084852	IQGAP1	0.0129034	0.00234295	3.64302e-08	0.0613056	protein_coding	TRUE	IQGAP1
chr15	ENSG00000196547	cg04851675	rs2677749	MAN2A2	-0.0449429	0.0080646	2.506e-08	0.060886	protein_coding	TRUE	MAN2A2
chr15	ENSG00000196547	cg26869047	rs2677749	MAN2A2	-0.0543565	0.0106516	3.34093e-07	0.0526125	protein_coding	TRUE	MAN2A2
chr15	ENSG00000196547	cg01710897	rs2677749	MAN2A2	-0.028494	0.00572284	6.39136e-07	0.0533156	protein_coding	TRUE	MAN2A2
chr15	ENSG00000196547	cg23684204	rs2677749	MAN2A2	-0.0226678	0.00456493	6.84734e-07	0.0623911	protein_coding	TRUE	MAN2A2
chr15	ENSG00000196547	cg22288577	rs2677749	MAN2A2	-0.0509039	0.0102773	7.30704e-07	0.0556073	protein_coding	TRUE	MAN2A2
chr15	ENSG00000196547	cg09698960	rs2677749	MAN2A2	-0.0180823	0.00365783	7.67577e-07	0.197033	protein_coding	TRUE	MAN2A2
chr15	ENSG00000258725	cg26869047	rs77554484	PRC1-AS1	-4.56744	0.918457	6.59403e-07	0.339177	lncRNA	TRUE	PRC1-AS1
chr15	ENSG00000198794	cg15902774	rs7342591	SCAMP5	-0.0069411	0.0012592	3.54165e-08	0.473176	protein_coding	TRUE	SCAMP5
chr15	ENSG00000171914	cg26710563	rs2459898	TLN2	-0.0252041	0.00371917	1.2287e-11	0.559083	protein_coding	TRUE	TLN2
chr15	ENSG00000171914	cg14110457	rs2459898	TLN2	-0.0232579	0.00406885	1.09006e-08	0.353146	protein_coding	TRUE	TLN2
chr15	ENSG00000171914	cg01956614	rs2459898	TLN2	-0.0201165	0.00387674	2.11383e-07	0.378084	protein_coding	TRUE	TLN2
chr15	ENSG00000196391	cg25186680	rs2601190	ZNF774	-0.837291	0.158175	1.20026e-07	0.0500743	protein_coding	TRUE	ZNF774
chr17	ENSG00000133193	cg12432006	rs1052705	FAM104A	-0.182525	0.0206404	9.31125e-19	0.786632	protein_coding	TRUE	FAM104A
chr17	ENSG00000133193	cg11394644	rs1052705	FAM104A	-0.0858974	0.00983547	2.47047e-18	0.333926	protein_coding	TRUE	FAM104A
chr17	ENSG00000133193	cg26576875	rs1052705	FAM104A	-0.280273	0.0337315	9.6564e-17	0.735491	protein_coding	TRUE	FAM104A
chr17	ENSG00000133193	cg06563943	rs1052705	FAM104A	-0.148833	0.0181125	2.08423e-16	0.244857	protein_coding	TRUE	FAM104A
chr17	ENSG00000133193	cg01818128	rs1052705	FAM104A	-0.112877	0.0141547	1.52915e-15	0.581565	protein_coding	TRUE	FAM104A
chr17	ENSG00000133193	cg14148083	rs1052705	FAM104A	-0.0760833	0.0124533	9.99525e-10	0.246223	protein_coding	TRUE	FAM104A
chr17	ENSG00000133193	cg24346909	rs1052705	FAM104A	0.0599921	0.0106388	1.71028e-08	0.500511	protein_coding	TRUE	FAM104A
chr17	ENSG00000133193	cg01532051	rs1052705	FAM104A	-0.120198	0.0220416	4.94584e-08	0.457654	protein_coding	TRUE	FAM104A
chr17	ENSG00000133193	cg25559913	rs1052705	FAM104A	-0.0554242	0.0107811	2.73468e-07	0.729304	protein_coding	TRUE	FAM104A
chr17	ENSG00000133193	cg21927395	rs1052705	FAM104A	-0.0525147	0.0104349	4.83879e-07	0.902066	protein_coding	TRUE	FAM104A
chr17	ENSG00000007171	cg02948944	rs3751972	NOS2	-0.513381	0.0813286	2.74687e-10	0.18454	protein_coding	TRUE	NOS2
chr17	ENSG00000163597	cg14243899	rs16967307	SNHG16	-0.0717306	0.00904529	2.18866e-15	0.0897822	lncRNA	TRUE	SNHG16
chr17	ENSG00000163597	cg24321297	rs16967307	SNHG16	-0.0333254	0.00451611	1.59212e-13	0.0928149	lncRNA	TRUE	SNHG16
chr17	ENSG00000163597	cg16548154	rs16967307	SNHG16	-0.0285743	0.00406173	1.99241e-12	0.313846	lncRNA	TRUE	SNHG16
chr17	ENSG00000163597	cg13664588	rs16967307	SNHG16	-0.01966	0.00329536	2.43198e-09	0.405423	lncRNA	TRUE	SNHG16
chr17	ENSG00000163597	cg19439071	rs16967307	SNHG16	-0.0261874	0.0045449	8.31592e-09	0.451201	lncRNA	TRUE	SNHG16
chr17	ENSG00000163597	cg20503109	rs16967307	SNHG16	-0.0215115	0.00399909	7.4858e-08	0.433367	lncRNA	TRUE	SNHG16
chr19	ENSG00000105341	cg09537434	rs3786553	DMAC2	-0.349601	0.0711672	8.99741e-07	0.835778	protein_coding	TRUE	ATP5SL
chr19	ENSG00000105507	cg26955996	rs141670933	CABP5	-0.00733554	0.000666597	3.63699e-28	0.161985	protein_coding	TRUE	CABP5
chr19	ENSG00000105507	cg09422355	rs141670933	CABP5	-0.00627725	0.000605969	3.80778e-25	0.546509	protein_coding	TRUE	CABP5
chr19	ENSG00000105507	cg04937172	rs141670933	CABP5	-0.00634633	0.0006747	5.14644e-21	0.160791	protein_coding	TRUE	CABP5
chr19	ENSG00000105507	cg07040712	rs141670933	CABP5	-0.00343308	0.000390849	1.58246e-18	0.579657	protein_coding	TRUE	CABP5
chr19	ENSG00000105507	cg10149529	rs141670933	CABP5	-0.00393205	0.000458248	9.43714e-18	0.428268	protein_coding	TRUE	CABP5
chr19	ENSG00000105507	cg05308117	rs141670933	CABP5	-0.00256463	0.0003512	2.82503e-13	0.183921	protein_coding	TRUE	CABP5
chr19	ENSG00000105507	cg15920400	rs141670933	CABP5	-0.00303724	0.000424356	8.22812e-13	0.289573	protein_coding	TRUE	CABP5
chr19	ENSG00000105507	cg23522194	rs141670933	CABP5	-0.00325078	0.000551667	3.80067e-09	0.197446	protein_coding	TRUE	CABP5
chr19	ENSG00000105507	cg02380983	rs141670933	CABP5	-0.00209998	0.000380019	3.27631e-08	0.597762	protein_coding	TRUE	CABP5
chr19	ENSG00000105507	cg10222789	rs141670933	CABP5	-0.00220001	0.000422004	1.85559e-07	0.08121	protein_coding	TRUE	CABP5
chr2	ENSG00000134324	cg16440984	rs3795974	LPIN1	-0.00563621	0.000968099	5.81681e-09	0.860051	protein_coding	TRUE	LPIN1
chr2	ENSG00000134324	cg25654774	rs3795974	LPIN1	-0.0102454	0.00181852	1.76158e-08	0.807027	protein_coding	TRUE	LPIN1
chr2	ENSG00000221823	cg15482884	rs11343435	PPP3R1	0.0391885	0.0067345	5.91788e-09	0.206871	protein_coding	TRUE	PPP3R1
chr20	ENSG00000101191	cg12287702	rs2273412	DIDO1	-0.0470691	0.00929864	4.15019e-07	0.820254	protein_coding	TRUE	DIDO1
chr20	ENSG00000125814	cg07237542	rs6137917	NAPB	-0.00429975	0.000759299	1.48934e-08	0.839071	protein_coding	TRUE	NAPB
chr20	ENSG00000125814	cg22356976	rs6137917	NAPB	-0.00465293	0.000838713	2.89437e-08	0.356272	protein_coding	TRUE	NAPB
chr21	ENSG00000182093	cg11778840	rs111949013	GET1	0.0103993	0.00211741	9.04546e-07	0.205557	protein_coding	TRUE	WRB
chr3	ENSG00000080819	cg04251363	rs4857404	CPOX	-0.159752	0.0302707	1.30995e-07	0.0502184	protein_coding	TRUE	CPOX
chr3	ENSG00000163913	cg16516295	rs2260840	IFT122	0.133351	0.0224449	2.82872e-09	0.226238	protein_coding	TRUE	IFT122
chr3	ENSG00000163913	cg08049441	rs2260840	IFT122	0.113393	0.0217595	1.87613e-07	0.0856013	protein_coding	TRUE	IFT122
chr3	ENSG00000163913	cg08787647	rs2260840	IFT122	0.11634	0.0230464	4.46323e-07	0.145864	protein_coding	TRUE	IFT122
chr3	ENSG00000114446	cg08932533	rs7639774	IFT57	0.244348	0.0305321	1.21443e-15	0.444787	protein_coding	TRUE	IFT57
chr3	ENSG00000114446	cg06806080	rs7639774	IFT57	0.16145	0.020325	1.96647e-15	0.409844	protein_coding	TRUE	IFT57
chr3	ENSG00000114446	cg03187166	rs7639774	IFT57	0.201224	0.0256081	3.90868e-15	0.606011	protein_coding	TRUE	IFT57
chr3	ENSG00000114446	cg00492070	rs7639774	IFT57	0.14725	0.0192047	1.75486e-14	0.342795	protein_coding	TRUE	IFT57
chr3	ENSG00000114446	cg12422228	rs7639774	IFT57	0.139832	0.0183153	2.26275e-14	0.447062	protein_coding	TRUE	IFT57
chr3	ENSG00000114446	cg02487233	rs7639774	IFT57	0.107227	0.0150572	1.06911e-12	0.40758	protein_coding	TRUE	IFT57
chr3	ENSG00000114446	cg22029806	rs7639774	IFT57	0.110374	0.0156172	1.5781e-12	0.66487	protein_coding	TRUE	IFT57
chr3	ENSG00000114446	cg11741004	rs7639774	IFT57	0.104209	0.0154759	1.6544e-11	0.597952	protein_coding	TRUE	IFT57
chr3	ENSG00000114446	cg25881170	rs7639774	IFT57	0.0500442	0.00793811	2.89502e-10	0.149136	protein_coding	TRUE	IFT57
chr3	ENSG00000114446	cg03040360	rs7639774	IFT57	-0.0348357	0.00626681	2.71713e-08	0.282023	protein_coding	TRUE	IFT57
chr3	ENSG00000073792	cg18495847	rs35188816	IGF2BP2	-0.0552033	0.00734806	5.79485e-14	0.288529	protein_coding	TRUE	IGF2BP2
chr3	ENSG00000073792	cg16706546	rs35188816	IGF2BP2	-0.0414768	0.00599328	4.49926e-12	0.134585	protein_coding	TRUE	IGF2BP2
chr3	ENSG00000073792	cg23956648	rs35188816	IGF2BP2	-0.0540859	0.00795728	1.06796e-11	0.08878	protein_coding	TRUE	IGF2BP2
chr3	ENSG00000073792	cg07672748	rs35188816	IGF2BP2	-0.0259787	0.00466065	2.48889e-08	0.858966	protein_coding	TRUE	IGF2BP2
chr3	ENSG00000073792	cg05576949	rs35188816	IGF2BP2	-0.0276912	0.00554907	6.03057e-07	0.859803	protein_coding	TRUE	IGF2BP2
chr3	ENSG00000173226	cg01951420	rs11385480	IQCB1	0.217138	0.020377	1.63475e-26	0.130436	protein_coding	TRUE	IQCB1
chr3	ENSG00000196220	cg11134956	rs341785	SRGAP3	-0.0323734	0.0064386	4.95575e-07	0.805125	protein_coding	TRUE	SRGAP3
chr3	ENSG00000177311	cg04352534	rs2871960	ZBTB38	-0.0878426	0.0130801	1.87106e-11	0.818432	protein_coding	TRUE	ZBTB38
chr3	ENSG00000177311	cg11421029	rs2871960	ZBTB38	-0.0711516	0.0108678	5.87049e-11	0.762452	protein_coding	TRUE	ZBTB38
chr3	ENSG00000177311	cg21380154	rs2871960	ZBTB38	-0.0573529	0.00903864	2.21996e-10	0.356892	protein_coding	TRUE	ZBTB38
chr3	ENSG00000177311	cg02936049	rs2871960	ZBTB38	-0.0664893	0.0105408	2.83068e-10	0.44618	protein_coding	TRUE	ZBTB38
chr3	ENSG00000177311	cg03848978	rs2871960	ZBTB38	-0.0484064	0.00794192	1.09398e-09	0.912244	protein_coding	TRUE	ZBTB38
chr3	ENSG00000177311	cg06820102	rs2871960	ZBTB38	-0.0717952	0.012026	2.37254e-09	0.980963	protein_coding	TRUE	ZBTB38
chr3	ENSG00000177311	cg10394922	rs2871960	ZBTB38	-0.0297284	0.00540691	3.83629e-08	0.870824	protein_coding	TRUE	ZBTB38
chr4	ENSG00000109472	cg01925521	rs13110854	CPE	-0.0036741	0.000723257	3.77566e-07	0.076221	protein_coding	TRUE	CPE
chr5	ENSG00000164327	cg05015628	rs13184911	RICTOR	-0.0113532	0.00152245	8.83669e-14	0.141896	protein_coding	TRUE	RICTOR
chr5	ENSG00000164327	cg04869206	rs13184911	RICTOR	0.00824459	0.00134841	9.69886e-10	0.936545	protein_coding	TRUE	RICTOR
chr5	ENSG00000164327	cg24571930	rs13184911	RICTOR	-0.00807419	0.00143842	1.98595e-08	0.127503	protein_coding	TRUE	RICTOR
chr6	ENSG00000137274	cg26831227	rs11970389	BPHL	-1.56577	0.305353	2.93232e-07	0.528578	protein_coding	TRUE	BPHL
chr6	ENSG00000137274	cg08579663	rs11970389	BPHL	-0.555028	0.108616	3.22133e-07	0.635474	protein_coding	TRUE	BPHL
chr6	ENSG00000137274	cg01356548	rs11970389	BPHL	0.666928	0.133771	6.17692e-07	0.669737	protein_coding	TRUE	BPHL
chr6	ENSG00000213066	cg04623147	rs7749278	CEP43	-0.0640158	0.00974004	4.94962e-11	0.327026	protein_coding	TRUE	FGFR1OP
chr6	ENSG00000213066	cg12798992	rs7749278	CEP43	0.129445	0.0218005	2.89002e-09	0.0588842	protein_coding	TRUE	FGFR1OP
chr6	ENSG00000213066	cg06454157	rs7749278	CEP43	-0.0365927	0.00723049	4.17306e-07	0.294094	protein_coding	TRUE	FGFR1OP
chr6	ENSG00000079691	cg21668832	rs74943715	CARMIL1	-0.849026	0.114393	1.15341e-13	0.957429	protein_coding	TRUE	LRRC16A
chr7	ENSG00000214253	cg19331779	rs6967483	FIS1	0.432262	0.0808438	8.94838e-08	0.254438	protein_coding	TRUE	FIS1
chr7	ENSG00000122778	cg12483292	rs540649	KIAA1549	0.130728	0.0241886	6.49846e-08	0.368004	protein_coding	TRUE	KIAA1549
chr7	ENSG00000188185	cg26260033	rs12531635	LINC00265	-0.961188	0.191038	4.86942e-07	0.688412	lncRNA	TRUE	LINC00265
chr7	ENSG00000106400	cg19331779	rs79140247	ZNHIT1	0.410549	0.0742264	3.18348e-08	0.0754636	protein_coding	TRUE	ZNHIT1
chr8	ENSG00000254093	cg26101170	rs4841408	PINX1	0.803048	0.152412	1.37226e-07	0.916945	protein_coding	TRUE	PINX1
chr8	ENSG00000254093	cg26224715	rs4841408	PINX1	0.702724	0.135071	1.96496e-07	0.871152	protein_coding	TRUE	PINX1
chr8	ENSG00000254093	cg23808421	rs4841408	PINX1	0.463534	0.0910584	3.57104e-07	0.526633	protein_coding	TRUE	PINX1
chr8	ENSG00000254093	cg27411982	rs4841408	PINX1	-0.141683	0.0280857	4.54326e-07	0.941109	protein_coding	TRUE	PINX1
chr12	ENSG00000111275	cg13422253	rs3858706	ALDH2	-0.0199206	0.00398122	5.62568e-07	0.129419	protein_coding	TRUE	ALDH2
