# Supplementary material for: QTL mapping of human retina DNA methylation identifies 87 gene-epigenome interactions in age-related macular degeneration
Source: Nat Commun. 2024 Mar 4;15:1972. doi: 10.1038/s41467-024-46063-8 (PMC10912779; doi:10.1038/s41467-024-46063-8)
Supplement: Supplementary file 41 — Supplementary Data 38 [file 41467_2024_46063_MOESM41_ESM.xlsx]

## Sheet: EM_coloc_CRE
E	M	best.snp.EM	PPA.EM	chr	Gene_symbol	Biotype	Target gene based on CRE
ENSG00000162461	cg00601916	rs1108185	0.802796	chr1	SLC25A34	protein_coding	SLC25A34
ENSG00000049239	cg17805199	rs9435144	0.804267	chr1	H6PD	protein_coding	H6PD
ENSG00000143537	cg24250549	rs45444697	0.804474	chr1	ADAM15	protein_coding	ADAM15
ENSG00000143811	cg04482794	rs77157663	0.806736	chr1	PYCR2	protein_coding	PYCR2
ENSG00000143434	cg00318000	rs12088941	0.811258	chr1	SEMA6C	protein_coding	SEMA6C
ENSG00000143774	cg20999799	rs111433618	0.81353	chr1	GUK1	protein_coding	GUK1
ENSG00000143195	cg12850103	rs186023662	0.814595	chr1	ILDR2	protein_coding	ILDR2
ENSG00000185436	cg26835312	rs12094257	0.816446	chr1	IFNLR1	protein_coding	IFNLR1
ENSG00000143740	cg21459583	rs2295994	0.816694	chr1	SNAP47	protein_coding	SNAP47
ENSG00000185436	cg08700651	rs12094257	0.816736	chr1	IFNLR1	protein_coding	IFNLR1
ENSG00000117305	cg10205764	rs59640963	0.816797	chr1	HMGCL	protein_coding	HMGCL
ENSG00000178922	cg07906567	rs6692611	0.817185	chr1	HYI	protein_coding	HYI
ENSG00000080947	cg21601498	rs139452064	0.817861	chr1	CROCCP3	transcribed_unprocessed_pseudogene	CROCCP3
ENSG00000159479	cg06350161	rs111288020	0.819741	chr1	MED8	protein_coding	MED8
ENSG00000162461	cg20843478	rs1108185	0.820544	chr1	SLC25A34	protein_coding	SLC25A34
ENSG00000162433	cg10142878	rs3934817	0.820934	chr1	AK4	protein_coding	AK4
ENSG00000242485	cg27642349	rs34442823	0.821418	chr1	MRPL20	protein_coding	MRPL20
ENSG00000227533	cg06094523	rs200895692	0.823616	chr1	SLC2A1-AS1	lincRNA	SLC2A1-AS1
ENSG00000143398	cg21828982	rs182830202	0.824037	chr1	PIP5K1A	protein_coding	PIP5K1A
ENSG00000229444	cg04693106	rs76760124	0.824105	chr1	RP11-184I16.4	antisense	RP11-184I16.4
ENSG00000126091	cg06322035	rs12024345	0.825269	chr1	ST3GAL3	protein_coding	ST3GAL3
ENSG00000198520	cg03044096	rs4660821	0.825755	chr1	C1orf228	protein_coding	C1orf228
ENSG00000133069	cg08326593	rs1668871	0.825926	chr1	TMCC2	protein_coding	TMCC2
ENSG00000080947	cg14981532	rs139452064	0.826104	chr1	CROCCP3	transcribed_unprocessed_pseudogene	CROCCP3
ENSG00000088280	cg12023170	rs2077066	0.826818	chr1	ASAP3	protein_coding	ASAP3
ENSG00000235501	cg10607462	rs76032537	0.826876	chr1	RP4-639F20.1	antisense	RP4-639F20.1
ENSG00000242485	cg15688253	rs34442823	0.829634	chr1	MRPL20	protein_coding	MRPL20
ENSG00000133069	cg21545522	rs1668871	0.831872	chr1	TMCC2	protein_coding	TMCC2
ENSG00000116514	cg04906435	rs194647	0.833518	chr1	RNF19B	protein_coding	RNF19B
ENSG00000162461	cg19916794	rs1108185	0.835505	chr1	SLC25A34	protein_coding	SLC25A34
ENSG00000122176	cg21089380	rs4971252	0.83575	chr1	FMOD	protein_coding	FMOD
ENSG00000143434	cg06035839	rs12088941	0.835821	chr1	SEMA6C	protein_coding	SEMA6C
ENSG00000116514	cg10120255	rs194646	0.836065	chr1	RNF19B	protein_coding	RNF19B
ENSG00000116157	cg01400822	rs6588431	0.83612	chr1	GPX7	protein_coding	GPX7
ENSG00000122176	cg11914824	rs4971252	0.836246	chr1	FMOD	protein_coding	FMOD
ENSG00000116157	cg03452047	rs6588431	0.836548	chr1	GPX7	protein_coding	GPX7
ENSG00000116514	cg14806693	rs194647	0.836653	chr1	RNF19B	protein_coding	RNF19B
ENSG00000179163	cg26873754	rs3003332	0.837308	chr1	FUCA1	protein_coding	FUCA1
ENSG00000179163	cg05560725	rs2070953	0.837423	chr1	FUCA1	protein_coding	FUCA1
ENSG00000179163	cg12626384	rs2070954	0.837512	chr1	FUCA1	protein_coding	FUCA1
ENSG00000119283	cg01960686	rs6659596	0.837627	chr1	TRIM67	protein_coding	TRIM67
ENSG00000179163	cg07568418	rs2070954	0.838082	chr1	FUCA1	protein_coding	FUCA1
ENSG00000176022	cg10784110	rs190796582	0.838196	chr1	B3GALT6	protein_coding	B3GALT6
ENSG00000158109	cg07330442	rs12757620	0.840575	chr1	TPRG1L	protein_coding	TPRG1L
ENSG00000126091	cg20452714	rs12120287	0.840719	chr1	ST3GAL3	protein_coding	ST3GAL3
ENSG00000242485	cg25234611	rs34442823	0.840906	chr1	MRPL20	protein_coding	MRPL20
ENSG00000049239	cg06988251	rs9435144	0.841252	chr1	H6PD	protein_coding	H6PD
ENSG00000235098	cg02668764	rs3766165	0.844091	chr1	ANKRD65	protein_coding	ANKRD65
ENSG00000133069	cg00142815	rs1172113	0.844175	chr1	TMCC2	protein_coding	TMCC2
ENSG00000179743	cg16109817	rs6666548	0.844448	chr1	FLJ37453	antisense	FLJ37453
ENSG00000133069	cg13303403	rs1172113	0.844765	chr1	TMCC2	protein_coding	TMCC2
ENSG00000117505	cg00049156	rs10782959	0.845638	chr1	DR1	protein_coding	DR1
ENSG00000182004	cg06642677	rs11240607	0.84651	chr1	SNRPE	protein_coding	SNRPE
ENSG00000249087	cg22502492	rs638722	0.848421	chr1	ZNF436-AS1	antisense	ZNF436-AS1
ENSG00000049239	cg04566694	rs9435144	0.849898	chr1	H6PD	protein_coding	H6PD
ENSG00000163393	cg20623690	rs2452551	0.850036	chr1	SLC22A15	protein_coding	SLC22A15
ENSG00000133069	cg02716605	rs1172113	0.850316	chr1	TMCC2	protein_coding	TMCC2
ENSG00000162433	cg06339716	rs3934817	0.85291	chr1	AK4	protein_coding	AK4
ENSG00000133069	cg25393376	rs1668871	0.853028	chr1	TMCC2	protein_coding	TMCC2
ENSG00000116157	cg22129364	rs6588431	0.855717	chr1	GPX7	protein_coding	GPX7
ENSG00000116157	cg26251270	rs6588431	0.855853	chr1	GPX7	protein_coding	GPX7
ENSG00000133069	cg11170025	rs1668871	0.856375	chr1	TMCC2	protein_coding	TMCC2
ENSG00000143157	cg18267943	rs7548191	0.857848	chr1	POGK	protein_coding	POGK
ENSG00000116157	cg23272399	rs6588431	0.857849	chr1	GPX7	protein_coding	GPX7
ENSG00000116157	cg02453146	rs6588431	0.857992	chr1	GPX7	protein_coding	GPX7
ENSG00000143811	cg06939851	rs77157663	0.859062	chr1	PYCR2	protein_coding	PYCR2
ENSG00000049239	cg07173218	rs9435144	0.859424	chr1	H6PD	protein_coding	H6PD
ENSG00000116514	cg20340029	rs194642	0.860415	chr1	RNF19B	protein_coding	RNF19B
ENSG00000116157	cg06612871	rs6588431	0.860732	chr1	GPX7	protein_coding	GPX7
ENSG00000227533	cg00568910	rs17387775	0.861424	chr1	SLC2A1-AS1	lincRNA	SLC2A1-AS1
ENSG00000116857	cg03981535	rs56327794	0.861918	chr1	TMEM9	protein_coding	TMEM9
ENSG00000237975	cg23107878	rs12130219	0.862417	chr1	FLG-AS1	antisense	FLG-AS1
ENSG00000143157	cg02063079	rs7548191	0.862525	chr1	POGK	protein_coding	POGK
ENSG00000133069	cg10768996	rs1172113	0.864102	chr1	TMCC2	protein_coding	TMCC2
ENSG00000162461	cg22956858	rs1108185	0.86588	chr1	SLC25A34	protein_coding	SLC25A34
ENSG00000162461	cg10483611	rs1108185	0.865884	chr1	SLC25A34	protein_coding	SLC25A34
ENSG00000116514	cg00843917	rs194642	0.866992	chr1	RNF19B	protein_coding	RNF19B
ENSG00000143772	cg12136950	rs697847	0.867629	chr1	ITPKB	protein_coding	ITPKB
ENSG00000117528	cg09160344	rs72727492	0.870163	chr1	ABCD3	protein_coding	ABCD3
ENSG00000049239	cg11521888	rs9435144	0.871158	chr1	H6PD	protein_coding	H6PD
ENSG00000162873	cg09662818	rs7533637	0.871407	chr1	KLHDC8A	protein_coding	KLHDC8A
ENSG00000049239	cg25284492	rs9435144	0.872189	chr1	H6PD	protein_coding	H6PD
ENSG00000242485	cg20747739	rs2275915	0.872392	chr1	MRPL20	protein_coding	MRPL20
ENSG00000235098	cg17507949	rs3766165	0.873521	chr1	ANKRD65	protein_coding	ANKRD65
ENSG00000176022	cg00211609	rs190796582	0.874439	chr1	B3GALT6	protein_coding	B3GALT6
ENSG00000049239	cg09122657	rs9435144	0.874629	chr1	H6PD	protein_coding	H6PD
ENSG00000176022	cg00657094	rs190796582	0.875666	chr1	B3GALT6	protein_coding	B3GALT6
ENSG00000158109	cg09269935	rs2244942	0.876578	chr1	TPRG1L	protein_coding	TPRG1L
ENSG00000176022	cg12345380	rs112603604	0.877953	chr1	B3GALT6	protein_coding	B3GALT6
ENSG00000176022	cg09331144	rs112603604	0.878623	chr1	B3GALT6	protein_coding	B3GALT6
ENSG00000176022	cg20411340	rs112603604	0.878742	chr1	B3GALT6	protein_coding	B3GALT6
ENSG00000235098	cg00040588	rs3766165	0.88027	chr1	ANKRD65	protein_coding	ANKRD65
ENSG00000235098	cg22827694	rs3766165	0.881383	chr1	ANKRD65	protein_coding	ANKRD65
ENSG00000213625	cg26299980	rs12145690	0.881483	chr1	LEPROT	protein_coding	LEPROT
ENSG00000213625	cg16413020	rs12145690	0.883596	chr1	LEPROT	protein_coding	LEPROT
ENSG00000213625	cg14976592	rs12145690	0.884962	chr1	LEPROT	protein_coding	LEPROT
ENSG00000235098	cg00060374	rs12089560	0.885622	chr1	ANKRD65	protein_coding	ANKRD65
ENSG00000117505	cg17858364	rs10782959	0.887633	chr1	DR1	protein_coding	DR1
ENSG00000227533	cg09824328	rs200895692	0.888048	chr1	SLC2A1-AS1	lincRNA	SLC2A1-AS1
ENSG00000235098	cg15633699	rs3766165	0.889779	chr1	ANKRD65	protein_coding	ANKRD65
ENSG00000227533	cg00102166	rs17387775	0.890929	chr1	SLC2A1-AS1	lincRNA	SLC2A1-AS1
ENSG00000134744	cg06905679	rs200263495	0.891222	chr1	ZCCHC11	protein_coding	ZCCHC11
ENSG00000227533	cg20282814	rs710217	0.893522	chr1	SLC2A1-AS1	lincRNA	SLC2A1-AS1
ENSG00000227533	cg12101479	rs17387775	0.893873	chr1	SLC2A1-AS1	lincRNA	SLC2A1-AS1
ENSG00000266472	cg18529259	rs7512552	0.894685	chr1	MRPS21	protein_coding	MRPS21
ENSG00000227533	cg21615440	rs200895692	0.895386	chr1	SLC2A1-AS1	lincRNA	SLC2A1-AS1
ENSG00000227533	cg03128534	rs710217	0.89641	chr1	SLC2A1-AS1	lincRNA	SLC2A1-AS1
ENSG00000160716	cg18006944	rs3811450	0.89765	chr1	CHRNB2	protein_coding	CHRNB2
ENSG00000227533	cg07803811	rs710217	0.899172	chr1	SLC2A1-AS1	lincRNA	SLC2A1-AS1
ENSG00000227533	cg06792911	rs17387775	0.901713	chr1	SLC2A1-AS1	lincRNA	SLC2A1-AS1
ENSG00000227533	cg09003612	rs17387775	0.901911	chr1	SLC2A1-AS1	lincRNA	SLC2A1-AS1
ENSG00000227533	cg12656391	rs17387775	0.901911	chr1	SLC2A1-AS1	lincRNA	SLC2A1-AS1
ENSG00000158109	cg24312874	rs34128889	0.907998	chr1	TPRG1L	protein_coding	TPRG1L
ENSG00000249087	cg04703069	rs638722	0.908438	chr1	ZNF436-AS1	antisense	ZNF436-AS1
ENSG00000117410	cg17781893	rs3216995	0.916237	chr1	ATP6V0B	protein_coding	ATP6V0B
ENSG00000227533	cg10197057	rs17387775	0.932206	chr1	SLC2A1-AS1	lincRNA	SLC2A1-AS1
ENSG00000067057	cg18166150	rs9423693	0.805645	chr10	PFKP	protein_coding	PFKP
ENSG00000107551	cg27462740	rs11818623	0.806103	chr10	RASSF4	protein_coding	RASSF4
ENSG00000166228	cg25363622	rs2854614	0.80753	chr10	PCBD1	protein_coding	PCBD1
ENSG00000156515	cg06214126	rs61869987	0.810307	chr10	HK1	protein_coding	HK1
ENSG00000198964	cg13949086	rs10508930	0.812039	chr10	SGMS1	protein_coding	SGMS1
ENSG00000127884	cg20534287	rs56142250	0.816859	chr10	ECHS1	protein_coding	ECHS1
ENSG00000224812	cg15331834	rs10900143	0.81944	chr10	TMEM72-AS1	antisense	TMEM72-AS1
ENSG00000166228	cg07409741	rs2854613	0.821298	chr10	PCBD1	protein_coding	PCBD1
ENSG00000224812	cg26562566	rs12773699	0.824231	chr10	TMEM72-AS1	antisense	TMEM72-AS1
ENSG00000127884	cg01291076	rs200073186	0.826473	chr10	ECHS1	protein_coding	ECHS1
ENSG00000127884	cg24905316	rs56142250	0.827643	chr10	ECHS1	protein_coding	ECHS1
ENSG00000224812	cg11258001	rs10900143	0.83266	chr10	TMEM72-AS1	antisense	TMEM72-AS1
ENSG00000232656	cg07316943	rs3750729	0.835282	chr10	IDI2-AS1	antisense	IDI2-AS1
ENSG00000107551	cg01325993	rs10793573	0.838425	chr10	RASSF4	protein_coding	RASSF4
ENSG00000224812	cg12126991	rs10900143	0.842294	chr10	TMEM72-AS1	antisense	TMEM72-AS1
ENSG00000232656	cg11799387	rs3750729	0.843333	chr10	IDI2-AS1	antisense	IDI2-AS1
ENSG00000107957	cg14972210	rs72815777	0.846523	chr10	SH3PXD2A	protein_coding	SH3PXD2A
ENSG00000224812	cg25215608	rs10900143	0.851315	chr10	TMEM72-AS1	antisense	TMEM72-AS1
ENSG00000198964	cg11724726	rs10508930	0.869198	chr10	SGMS1	protein_coding	SGMS1
ENSG00000198964	cg10034176	rs10508930	0.869399	chr10	SGMS1	protein_coding	SGMS1
ENSG00000107551	cg27462740	rs1888983	0.876503	chr10	RASSF4	protein_coding	RASSF4
ENSG00000198964	cg00936935	rs10508930	0.878097	chr10	SGMS1	protein_coding	SGMS1
ENSG00000198964	cg16823698	rs10508930	0.883197	chr10	SGMS1	protein_coding	SGMS1
ENSG00000198964	cg17673495	rs10508930	0.898334	chr10	SGMS1	protein_coding	SGMS1
ENSG00000198964	cg20014988	rs10508930	0.898565	chr10	SGMS1	protein_coding	SGMS1
ENSG00000198964	cg13382516	rs10508930	0.898747	chr10	SGMS1	protein_coding	SGMS1
ENSG00000198964	cg05102856	rs10508930	0.899255	chr10	SGMS1	protein_coding	SGMS1
ENSG00000198964	cg24037270	rs10508930	0.899542	chr10	SGMS1	protein_coding	SGMS1
ENSG00000198964	cg17569303	rs10508930	0.899712	chr10	SGMS1	protein_coding	SGMS1
ENSG00000198964	cg11764846	rs10508930	0.899756	chr10	SGMS1	protein_coding	SGMS1
ENSG00000198964	cg15678767	rs10508930	0.900169	chr10	SGMS1	protein_coding	SGMS1
ENSG00000198964	cg13784163	rs10508930	0.900173	chr10	SGMS1	protein_coding	SGMS1
ENSG00000198964	cg07494431	rs10508930	0.900189	chr10	SGMS1	protein_coding	SGMS1
ENSG00000198964	cg14611218	rs10508930	0.900615	chr10	SGMS1	protein_coding	SGMS1
ENSG00000198964	cg03585110	rs10508930	0.900615	chr10	SGMS1	protein_coding	SGMS1
ENSG00000198964	cg00453368	rs10508930	0.900684	chr10	SGMS1	protein_coding	SGMS1
ENSG00000198964	cg22388374	rs10508930	0.900702	chr10	SGMS1	protein_coding	SGMS1
ENSG00000198964	cg00168459	rs10508930	0.900918	chr10	SGMS1	protein_coding	SGMS1
ENSG00000198964	cg10188795	rs10508930	0.901717	chr10	SGMS1	protein_coding	SGMS1
ENSG00000198964	cg09425247	rs10508930	0.902104	chr10	SGMS1	protein_coding	SGMS1
ENSG00000198964	cg08557120	rs10508930	0.902193	chr10	SGMS1	protein_coding	SGMS1
ENSG00000198964	cg08363235	rs10508930	0.902434	chr10	SGMS1	protein_coding	SGMS1
ENSG00000255545	cg17142020	rs11223852	0.80265	chr11	RP11-627G23.1	processed_transcript	RP11-627G23.1
ENSG00000186635	cg18871067	rs3765105	0.804974	chr11	ARAP1	protein_coding	ARAP1
ENSG00000172803	cg16073427	rs17854357	0.805059	chr11	SNX32	protein_coding	SNX32
ENSG00000166800	cg07915343	rs11605559	0.810879	chr11	LDHAL6A	protein_coding	LDHAL6A
ENSG00000186635	cg16168406	rs3765105	0.812585	chr11	ARAP1	protein_coding	ARAP1
ENSG00000162194	cg27305510	rs4489748	0.816562	chr11	LBHD1	protein_coding	LBHD1
ENSG00000162194	cg02375832	rs4489748	0.818179	chr11	LBHD1	protein_coding	LBHD1
ENSG00000245532	cg15119034	rs512715	0.81988	chr11	NEAT1	lincRNA	NEAT1
ENSG00000245532	cg02779691	rs512715	0.821195	chr11	NEAT1	lincRNA	NEAT1
ENSG00000254860	cg09997546	rs59454329	0.822535	chr11	TMEM9B-AS1	antisense	TMEM9B-AS1
ENSG00000174669	cg17415721	rs72557994	0.822719	chr11	SLC29A2	protein_coding	SLC29A2
ENSG00000150764	cg03474251	rs34088139	0.823996	chr11	DIXDC1	protein_coding	DIXDC1
ENSG00000166800	cg05655707	rs11605559	0.826688	chr11	LDHAL6A	protein_coding	LDHAL6A
ENSG00000173825	cg16555856	rs612392	0.827011	chr11	TIGD3	protein_coding	TIGD3
ENSG00000174669	cg16909570	rs72557994	0.827263	chr11	SLC29A2	protein_coding	SLC29A2
ENSG00000166689	cg02095290	rs4757491	0.82802	chr11	PLEKHA7	protein_coding	PLEKHA7
ENSG00000172803	cg19792802	rs17854357	0.828204	chr11	SNX32	protein_coding	SNX32
ENSG00000154127	cg23554917	rs7128198	0.829495	chr11	UBASH3B	protein_coding	UBASH3B
ENSG00000165905	cg24204282	rs56148819	0.833022	chr11	LARGE2	protein_coding	LARGE2
ENSG00000185187	cg26461944	rs10902159	0.834862	chr11	SIGIRR	protein_coding	SIGIRR
ENSG00000166689	cg15306794	rs12288625	0.835383	chr11	PLEKHA7	protein_coding	PLEKHA7
ENSG00000165905	cg05861348	rs56148819	0.835446	chr11	LARGE2	protein_coding	LARGE2
ENSG00000166337	cg08925169	rs12272856	0.83691	chr11	TAF10	protein_coding	TAF10
ENSG00000110400	cg01686933	rs10790339	0.837181	chr11	NECTIN1	protein_coding	NECTIN1
ENSG00000172803	cg25302603	rs17854357	0.837601	chr11	SNX32	protein_coding	SNX32
ENSG00000110514	cg16983008	rs10501320	0.838692	chr11	MADD	protein_coding	MADD
ENSG00000166796	cg14332815	rs11605386	0.841173	chr11	LDHC	protein_coding	LDHC
ENSG00000149548	cg18594170	rs3809054	0.841751	chr11	CCDC15	protein_coding	CCDC15
ENSG00000166796	cg05449100	rs11605386	0.847102	chr11	LDHC	protein_coding	LDHC
ENSG00000110514	cg20075042	rs10501320	0.851495	chr11	MADD	protein_coding	MADD
ENSG00000173825	cg11156528	rs77130160	0.852371	chr11	TIGD3	protein_coding	TIGD3
ENSG00000110514	cg27221977	rs10501320	0.852945	chr11	MADD	protein_coding	MADD
ENSG00000166689	cg11134966	rs4757479	0.85336	chr11	PLEKHA7	protein_coding	PLEKHA7
ENSG00000110514	cg23350132	rs10501320	0.854723	chr11	MADD	protein_coding	MADD
ENSG00000110514	cg12841566	rs10501320	0.854864	chr11	MADD	protein_coding	MADD
ENSG00000133818	cg06969635	rs2915405	0.856399	chr11	RRAS2	protein_coding	RRAS2
ENSG00000166796	cg18888461	rs11605386	0.856839	chr11	LDHC	protein_coding	LDHC
ENSG00000150764	cg18762111	rs34088139	0.857475	chr11	DIXDC1	protein_coding	DIXDC1
ENSG00000166796	cg26740318	rs11605386	0.857751	chr11	LDHC	protein_coding	LDHC
ENSG00000166796	cg13375392	rs11605386	0.860111	chr11	LDHC	protein_coding	LDHC
ENSG00000166796	cg06888460	rs11605386	0.860478	chr11	LDHC	protein_coding	LDHC
ENSG00000166689	cg01977079	rs4757491	0.860718	chr11	PLEKHA7	protein_coding	PLEKHA7
ENSG00000166689	cg15084286	rs34502475	0.865834	chr11	PLEKHA7	protein_coding	PLEKHA7
ENSG00000166796	cg01489981	rs11605386	0.866936	chr11	LDHC	protein_coding	LDHC
ENSG00000166796	cg19767548	rs11605386	0.867659	chr11	LDHC	protein_coding	LDHC
ENSG00000166796	cg02232751	rs11605386	0.872701	chr11	LDHC	protein_coding	LDHC
ENSG00000173825	cg19074962	rs77130160	0.885456	chr11	TIGD3	protein_coding	TIGD3
ENSG00000139725	cg03141007	rs1168663	0.801562	chr12	RHOF	protein_coding	RHOF
ENSG00000120832	cg21744360	rs2287161	0.801712	chr12	MTERF2	protein_coding	MTERF2
ENSG00000139620	cg24623196	rs7133756	0.802971	chr12	KANSL2	protein_coding	KANSL2
ENSG00000139725	cg26392922	rs712852	0.803479	chr12	RHOF	protein_coding	RHOF
ENSG00000174718	cg20731015	rs12370315	0.812223	chr12	KIAA1551	protein_coding	KIAA1551
ENSG00000139263	cg26947450	rs7970054	0.814941	chr12	LRIG3	protein_coding	LRIG3
ENSG00000174718	cg17560472	rs12370315	0.816027	chr12	KIAA1551	protein_coding	KIAA1551
ENSG00000269514	cg16921775	rs4760696	0.818704	chr12	RP11-370I10.12	lincRNA	RP11-370I10.12
ENSG00000136026	cg09239756	rs61942136	0.819728	chr12	CKAP4	protein_coding	CKAP4
ENSG00000136026	cg13249833	rs61942136	0.820834	chr12	CKAP4	protein_coding	CKAP4
ENSG00000136026	cg13163660	rs61942136	0.820984	chr12	CKAP4	protein_coding	CKAP4
ENSG00000257337	cg25285794	rs34029821	0.822597	chr12	RP11-983P16.4	antisense	RP11-983P16.4
ENSG00000256783	cg01843264	rs61945363	0.822618	chr12	RP11-503G7.1	lincRNA	RP11-503G7.1
ENSG00000135454	cg17311469	rs774896	0.825033	chr12	B4GALNT1	protein_coding	B4GALNT1
ENSG00000256783	cg18143359	rs61945363	0.826013	chr12	RP11-503G7.1	lincRNA	RP11-503G7.1
ENSG00000139725	cg00184240	rs1168663	0.83023	chr12	RHOF	protein_coding	RHOF
ENSG00000072609	cg11642324	rs61952781	0.830557	chr12	CHFR	protein_coding	CHFR
ENSG00000135454	cg09932758	rs774896	0.83431	chr12	B4GALNT1	protein_coding	B4GALNT1
ENSG00000135124	cg26400267	rs28360467	0.836271	chr12	P2RX4	protein_coding	P2RX4
ENSG00000185684	cg20352386	rs11246919	0.843135	chr12	EP400NL	protein_coding	EP400NL
ENSG00000256783	cg27523351	rs61945363	0.852896	chr12	RP11-503G7.1	lincRNA	RP11-503G7.1
ENSG00000166881	cg06400595	rs62621200	0.853564	chr12	NEMP1	protein_coding	NEMP1
ENSG00000174718	cg23977519	rs12370315	0.857845	chr12	KIAA1551	protein_coding	KIAA1551
ENSG00000072609	cg15710370	rs61952781	0.860449	chr12	CHFR	protein_coding	CHFR
ENSG00000072609	cg18066197	rs1564648	0.860878	chr12	CHFR	protein_coding	CHFR
ENSG00000072609	cg05237360	rs61952781	0.861801	chr12	CHFR	protein_coding	CHFR
ENSG00000072609	cg12581980	rs61952781	0.863733	chr12	CHFR	protein_coding	CHFR
ENSG00000182993	cg04671087	rs2075268	0.865438	chr12	C12orf60	protein_coding	C12orf60
ENSG00000182993	cg23932063	rs11830399	0.867231	chr12	C12orf60	protein_coding	C12orf60
ENSG00000072609	cg08409956	rs72624274	0.870072	chr12	CHFR	protein_coding	CHFR
ENSG00000072609	cg19268599	rs61952781	0.871624	chr12	CHFR	protein_coding	CHFR
ENSG00000072609	cg06119275	rs61952781	0.879904	chr12	CHFR	protein_coding	CHFR
ENSG00000072609	cg23149010	rs61952781	0.881199	chr12	CHFR	protein_coding	CHFR
ENSG00000072609	cg17092099	rs72624274	0.88188	chr12	CHFR	protein_coding	CHFR
ENSG00000072609	cg09904296	rs72624274	0.883962	chr12	CHFR	protein_coding	CHFR
ENSG00000072609	cg03538318	rs61952781	0.884281	chr12	CHFR	protein_coding	CHFR
ENSG00000072609	cg15108326	rs61952781	0.886269	chr12	CHFR	protein_coding	CHFR
ENSG00000072609	cg05625100	rs61952781	0.887923	chr12	CHFR	protein_coding	CHFR
ENSG00000072609	cg08424446	rs61952781	0.888029	chr12	CHFR	protein_coding	CHFR
ENSG00000072609	cg14903202	rs72624274	0.888106	chr12	CHFR	protein_coding	CHFR
ENSG00000072609	cg22844555	rs61952781	0.888513	chr12	CHFR	protein_coding	CHFR
ENSG00000072609	cg19837214	rs61952781	0.888753	chr12	CHFR	protein_coding	CHFR
ENSG00000072609	cg23470262	rs72624274	0.888815	chr12	CHFR	protein_coding	CHFR
ENSG00000072609	cg23058246	rs61952781	0.888822	chr12	CHFR	protein_coding	CHFR
ENSG00000072609	cg05614952	rs61952781	0.888828	chr12	CHFR	protein_coding	CHFR
ENSG00000072609	cg20765580	rs61952781	0.88883	chr12	CHFR	protein_coding	CHFR
ENSG00000072609	cg13046214	rs61952781	0.888831	chr12	CHFR	protein_coding	CHFR
ENSG00000072609	cg08695912	rs72624274	0.888834	chr12	CHFR	protein_coding	CHFR
ENSG00000072609	cg10388270	rs72624274	0.888835	chr12	CHFR	protein_coding	CHFR
ENSG00000072609	cg16020270	rs72624274	0.888841	chr12	CHFR	protein_coding	CHFR
ENSG00000072609	cg09537870	rs72624274	0.888856	chr12	CHFR	protein_coding	CHFR
ENSG00000072609	cg02243221	rs72624274	0.888882	chr12	CHFR	protein_coding	CHFR
ENSG00000072609	cg03425615	rs61952781	0.889456	chr12	CHFR	protein_coding	CHFR
ENSG00000072609	cg22149555	rs72624274	0.889611	chr12	CHFR	protein_coding	CHFR
ENSG00000072609	cg05626790	rs1564648	0.892976	chr12	CHFR	protein_coding	CHFR
ENSG00000256576	cg05625100	rs11246977	0.894474	chr12	RP13-977J11.2	lincRNA	RP13-977J11.2
ENSG00000139644	cg05164634	rs111230811	0.904693	chr12	TMBIM6	protein_coding	TMBIM6
ENSG00000139644	cg00665405	rs111230811	0.919693	chr12	TMBIM6	protein_coding	TMBIM6
ENSG00000185989	cg27607408	rs12021000	0.804668	chr13	RASA3	protein_coding	RASA3
ENSG00000150401	cg07204236	rs7333908	0.813357	chr13	DCUN1D2	protein_coding	DCUN1D2
ENSG00000150401	cg01383440	rs7333908	0.838285	chr13	DCUN1D2	protein_coding	DCUN1D2
ENSG00000150401	cg10400441	rs7333908	0.842404	chr13	DCUN1D2	protein_coding	DCUN1D2
ENSG00000150401	cg04340435	rs7333908	0.843255	chr13	DCUN1D2	protein_coding	DCUN1D2
ENSG00000185989	cg14423777	rs8001161	0.851524	chr13	RASA3	protein_coding	RASA3
ENSG00000185989	cg21716844	rs8001161	0.875868	chr13	RASA3	protein_coding	RASA3
ENSG00000123179	cg20399252	rs7983918	0.876605	chr13	EBPL	protein_coding	EBPL
ENSG00000123179	cg03658251	rs7983918	0.879465	chr13	EBPL	protein_coding	EBPL
ENSG00000123179	cg10201891	rs9568308	0.880903	chr13	EBPL	protein_coding	EBPL
ENSG00000123179	cg04663916	rs7983918	0.888877	chr13	EBPL	protein_coding	EBPL
ENSG00000165502	cg23565292	rs1952013	0.808823	chr14	RPL36AL	protein_coding	RPL36AL
ENSG00000165379	cg12959365	rs61990289	0.810281	chr14	LRFN5	protein_coding	LRFN5
ENSG00000183379	cg06688770	rs730384	0.81152	chr14	SYNDIG1L	protein_coding	SYNDIG1L
ENSG00000100884	cg22775413	rs11847138	0.816778	chr14	CPNE6	protein_coding	CPNE6
ENSG00000100441	cg10759590	rs10146358	0.824317	chr14	KHNYN	protein_coding	KHNYN
ENSG00000100577	cg02181287	rs8008449	0.828854	chr14	GSTZ1	protein_coding	GSTZ1
ENSG00000100884	cg21999213	rs62000824	0.832695	chr14	CPNE6	protein_coding	CPNE6
ENSG00000100441	cg05760053	rs3825588	0.837077	chr14	KHNYN	protein_coding	KHNYN
ENSG00000119650	cg17826543	rs35348551	0.838492	chr14	IFT43	protein_coding	IFT43
ENSG00000100441	cg13105904	rs10146358	0.841531	chr14	KHNYN	protein_coding	KHNYN
ENSG00000100441	cg23632528	rs3825588	0.842381	chr14	KHNYN	protein_coding	KHNYN
ENSG00000100441	cg05170515	rs3825588	0.844752	chr14	KHNYN	protein_coding	KHNYN
ENSG00000139899	cg05760053	rs10143703	0.848465	chr14	CBLN3	protein_coding	CBLN3
ENSG00000100884	cg23112188	rs12888763	0.848671	chr14	CPNE6	protein_coding	CPNE6
ENSG00000100884	cg00524400	rs3561	0.849217	chr14	CPNE6	protein_coding	CPNE6
ENSG00000100884	cg11479689	rs12888763	0.84951	chr14	CPNE6	protein_coding	CPNE6
ENSG00000129467	cg22990158	rs2332323	0.850089	chr14	ADCY4	protein_coding	ADCY4
ENSG00000183828	cg23473133	rs8017877	0.850976	chr14	NUDT14	protein_coding	NUDT14
ENSG00000042088	cg02190211	rs942190	0.855325	chr14	TDP1	protein_coding	TDP1
ENSG00000042088	cg22836787	rs942190	0.855845	chr14	TDP1	protein_coding	TDP1
ENSG00000258655	cg16488300	rs57278628	0.872808	chr14	ARHGAP5-AS1	antisense	ARHGAP5-AS1
ENSG00000129566	cg15035713	rs1713434	0.886763	chr14	TEP1	protein_coding	TEP1
ENSG00000100884	cg13419761	rs12888763	0.889612	chr14	CPNE6	protein_coding	CPNE6
ENSG00000140319	cg20752233	rs35492760	0.804598	chr15	SRP14	protein_coding	SRP14
ENSG00000140319	cg20592017	rs7321	0.814234	chr15	SRP14	protein_coding	SRP14
ENSG00000259520	cg16921702	rs12909625	0.824438	chr15	CTD-2651B20.3	antisense	CTD-2651B20.3
ENSG00000069869	cg02198044	rs4144243	0.825195	chr15	NEDD4	protein_coding	NEDD4
ENSG00000243789	cg15119365	rs4924576	0.827007	chr15	JMJD7	protein_coding	JMJD7
ENSG00000250007	cg21053529	rs12102006	0.833198	chr15	RP11-814P5.1	antisense	RP11-814P5.1
ENSG00000103966	cg21824733	rs8041458	0.85627	chr15	EHD4	protein_coding	EHD4
ENSG00000069966	cg01666163	rs113025993	0.875888	chr15	GNB5	protein_coding	GNB5
ENSG00000259221	cg12841645	rs1025143	0.884623	chr15	CTD-2050N2.1	antisense	CTD-2050N2.1
ENSG00000259221	cg19460792	rs1025143	0.894421	chr15	CTD-2050N2.1	antisense	CTD-2050N2.1
ENSG00000259221	cg25411488	rs1025143	0.894483	chr15	CTD-2050N2.1	antisense	CTD-2050N2.1
ENSG00000204991	cg14422696	rs78004870	0.800007	chr16	SPIRE2	protein_coding	SPIRE2
ENSG00000166548	cg09238666	rs113692212	0.800786	chr16	TK2	protein_coding	TK2
ENSG00000214725	cg27220660	rs747973	0.802645	chr16	CDIPT-AS1	transcribed_unitary_pseudogene	CDIPT-AS1
ENSG00000185739	cg13378153	rs1862862	0.803412	chr16	SRL	protein_coding	SRL
ENSG00000166548	cg07512993	rs13331952	0.812461	chr16	TK2	protein_coding	TK2
ENSG00000103175	cg13978662	rs8051369	0.813222	chr16	WFDC1	protein_coding	WFDC1
ENSG00000166548	cg01758899	rs13331952	0.814479	chr16	TK2	protein_coding	TK2
ENSG00000166548	cg07127456	rs13331952	0.815484	chr16	TK2	protein_coding	TK2
ENSG00000260083	cg17770593	rs142324477	0.815546	chr16	MIR762HG	antisense	MIR762HG
ENSG00000204991	cg07440826	rs2376879	0.815581	chr16	SPIRE2	protein_coding	SPIRE2
ENSG00000167186	cg03325633	rs17357834	0.820389	chr16	COQ7	protein_coding	COQ7
ENSG00000102924	cg00011740	rs3743775	0.822396	chr16	CBLN1	protein_coding	CBLN1
ENSG00000260083	cg22377963	rs142324477	0.831156	chr16	MIR762HG	antisense	MIR762HG
ENSG00000204991	cg03648679	rs7204250	0.832682	chr16	SPIRE2	protein_coding	SPIRE2
ENSG00000159648	cg08699646	rs4583232	0.832829	chr16	TEPP	protein_coding	TEPP
ENSG00000259877	cg05943563	rs8058136	0.836671	chr16	RP11-46C24.7	antisense	RP11-46C24.7
ENSG00000070761	cg09030961	rs77875726	0.840718	chr16	CFAP20	protein_coding	CFAP20
ENSG00000184207	cg01611548	rs25849	0.842374	chr16	PGP	protein_coding	PGP
ENSG00000260083	cg07698075	rs142324477	0.844048	chr16	MIR762HG	antisense	MIR762HG
ENSG00000184207	cg12777822	rs27345	0.849256	chr16	PGP	protein_coding	PGP
ENSG00000184207	cg09075268	rs25849	0.851913	chr16	PGP	protein_coding	PGP
ENSG00000177946	cg04562295	rs4424910	0.857751	chr16	CENPBD1	protein_coding	CENPBD1
ENSG00000140995	cg02817601	rs77901106	0.860139	chr16	DEF8	protein_coding	DEF8
ENSG00000260083	cg13764123	rs142324477	0.862516	chr16	MIR762HG	antisense	MIR762HG
ENSG00000261332	cg24304570	rs1557672	0.86517	chr16	RP11-297C4.1	antisense	RP11-297C4.1
ENSG00000102974	cg23695209	rs149012671	0.872407	chr16	CTCF	protein_coding	CTCF
ENSG00000258839	cg09028487	rs3212351	0.874387	chr16	MC1R	protein_coding	MC1R
ENSG00000204991	cg27121462	rs2376879	0.891818	chr16	SPIRE2	protein_coding	SPIRE2
ENSG00000204991	cg26513180	rs7186980	0.893215	chr16	SPIRE2	protein_coding	SPIRE2
ENSG00000204991	cg04287289	rs2376879	0.893301	chr16	SPIRE2	protein_coding	SPIRE2
ENSG00000140995	cg01883217	rs77901106	0.905728	chr16	DEF8	protein_coding	DEF8
ENSG00000149922	cg01514520	rs3809627	0.920157	chr16	TBX6	protein_coding	TBX6
ENSG00000149927	cg02190038	rs11150583	0.920539	chr16	DOC2A	protein_coding	DOC2A
ENSG00000260083	cg04033451	rs142324477	0.927096	chr16	MIR762HG	antisense	MIR762HG
ENSG00000214725	cg22581518	rs747973	0.932171	chr16	CDIPT-AS1	transcribed_unitary_pseudogene	CDIPT-AS1
ENSG00000214725	cg13552869	rs747973	0.942111	chr16	CDIPT-AS1	transcribed_unitary_pseudogene	CDIPT-AS1
ENSG00000149922	cg20052242	rs3809627	0.94517	chr16	TBX6	protein_coding	TBX6
ENSG00000261332	cg06710853	rs1557672	0.948397	chr16	RP11-297C4.1	antisense	RP11-297C4.1
ENSG00000214725	cg02575675	rs747973	0.949851	chr16	CDIPT-AS1	transcribed_unitary_pseudogene	CDIPT-AS1
ENSG00000214725	cg01827781	rs747973	0.949851	chr16	CDIPT-AS1	transcribed_unitary_pseudogene	CDIPT-AS1
ENSG00000214725	cg24235633	rs747973	0.949851	chr16	CDIPT-AS1	transcribed_unitary_pseudogene	CDIPT-AS1
ENSG00000214725	cg24474561	rs747973	0.949899	chr16	CDIPT-AS1	transcribed_unitary_pseudogene	CDIPT-AS1
ENSG00000214725	cg22191015	rs747973	0.95002	chr16	CDIPT-AS1	transcribed_unitary_pseudogene	CDIPT-AS1
ENSG00000261332	cg02220965	rs1557672	0.960511	chr16	RP11-297C4.1	antisense	RP11-297C4.1
ENSG00000261332	cg11513352	rs1557672	0.965866	chr16	RP11-297C4.1	antisense	RP11-297C4.1
ENSG00000261332	cg03041989	rs1557672	0.965904	chr16	RP11-297C4.1	antisense	RP11-297C4.1
ENSG00000109047	cg20207911	rs75438860	0.8012	chr17	RCVRN	protein_coding	RCVRN
ENSG00000175826	cg14438174	rs139127661	0.802045	chr17	CTDNEP1	protein_coding	CTDNEP1
ENSG00000197291	cg16631870	rs1078523	0.802198	chr17	RAMP2-AS1	lincRNA	RAMP2-AS1
ENSG00000180901	cg14195103	rs201650407	0.804268	chr17	KCTD2	protein_coding	KCTD2
ENSG00000187824	cg00549475	rs34549011	0.804963	chr17	TMEM220	protein_coding	TMEM220
ENSG00000180901	cg01884715	rs201650407	0.806817	chr17	KCTD2	protein_coding	KCTD2
ENSG00000129194	cg08090557	rs12944649	0.812103	chr17	SOX15	protein_coding	SOX15
ENSG00000262943	cg10721538	rs116464332	0.813584	chr17	ALOX12P2	transcribed_unprocessed_pseudogene	ALOX12P2
ENSG00000256806	cg21085035	rs7226265	0.814784	chr17	C17orf100	lincRNA	C17orf100
ENSG00000180638	cg27231068	rs12943590	0.818369	chr17	SLC47A2	protein_coding	SLC47A2
ENSG00000180901	cg18414877	rs201650407	0.820963	chr17	KCTD2	protein_coding	KCTD2
ENSG00000177728	cg24899767	rs11077791	0.823737	chr17	TMEM94	protein_coding	TMEM94
ENSG00000049283	cg09827751	rs757413	0.824177	chr17	EPN3	protein_coding	EPN3
ENSG00000260793	cg13607699	rs113844752	0.827472	chr17	RP5-882C2.2	antisense	RP5-882C2.2
ENSG00000219200	cg25101124	rs3180517	0.828158	chr17	RNASEK	protein_coding	RNASEK
ENSG00000180901	cg00727287	rs201650407	0.831336	chr17	KCTD2	protein_coding	KCTD2
ENSG00000109047	cg26853458	rs62064489	0.831611	chr17	RCVRN	protein_coding	RCVRN
ENSG00000256806	cg15288800	rs7226265	0.837573	chr17	C17orf100	lincRNA	C17orf100
ENSG00000229980	cg00032195	rs12601477	0.841474	chr17	TOB1-AS1	processed_transcript	TOB1-AS1
ENSG00000006282	cg17301311	rs9890200	0.84219	chr17	SPATA20	protein_coding	SPATA20
ENSG00000256806	cg15737409	rs7226265	0.844985	chr17	C17orf100	lincRNA	C17orf100
ENSG00000229980	cg22717211	rs12949115	0.84527	chr17	TOB1-AS1	processed_transcript	TOB1-AS1
ENSG00000006282	cg15017244	rs9890200	0.846302	chr17	SPATA20	protein_coding	SPATA20
ENSG00000229980	cg00001755	rs12601477	0.849833	chr17	TOB1-AS1	processed_transcript	TOB1-AS1
ENSG00000108826	cg25949363	rs11871126	0.851508	chr17	MRPL27	protein_coding	MRPL27
ENSG00000006282	cg26619156	rs9890200	0.855019	chr17	SPATA20	protein_coding	SPATA20
ENSG00000006282	cg16068336	rs9890200	0.859861	chr17	SPATA20	protein_coding	SPATA20
ENSG00000136449	cg15780578	rs75639658	0.863599	chr17	MYCBPAP	protein_coding	MYCBPAP
ENSG00000197291	cg06514003	rs1078523	0.866112	chr17	RAMP2-AS1	lincRNA	RAMP2-AS1
ENSG00000173801	cg08089518	rs7213095	0.868803	chr17	JUP	protein_coding	JUP
ENSG00000197291	cg10653060	rs1078523	0.869811	chr17	RAMP2-AS1	lincRNA	RAMP2-AS1
ENSG00000006282	cg06748848	rs9890200	0.879425	chr17	SPATA20	protein_coding	SPATA20
ENSG00000006282	cg03840924	rs9890200	0.904099	chr17	SPATA20	protein_coding	SPATA20
ENSG00000070495	cg16603176	rs9912009	0.90482	chr17	JMJD6	protein_coding	JMJD6
ENSG00000141504	cg08750459	rs858521	0.913106	chr17	SAT2	protein_coding	SAT2
ENSG00000075643	cg24914219	rs585927	0.8076	chr18	MOCOS	protein_coding	MOCOS
ENSG00000088756	cg05080578	rs4078265	0.810899	chr18	ARHGAP28	protein_coding	ARHGAP28
ENSG00000088756	cg08955448	rs4078265	0.811156	chr18	ARHGAP28	protein_coding	ARHGAP28
ENSG00000141759	cg00363486	rs57915366	0.825783	chr18	TXNL4A	protein_coding	TXNL4A
ENSG00000267270	cg04145927	rs9945590	0.835043	chr18	PARD6G-AS1	antisense	PARD6G-AS1
ENSG00000226742	cg00363486	rs75395155	0.843063	chr18	HSBP1L1	protein_coding	HSBP1L1
ENSG00000166347	cg16924061	rs1790861	0.847164	chr18	CYB5A	protein_coding	CYB5A
ENSG00000166569	cg26552025	rs11662475	0.85227	chr18	CPLX4	protein_coding	CPLX4
ENSG00000226742	cg11687085	rs75287701	0.878082	chr18	HSBP1L1	protein_coding	HSBP1L1
ENSG00000183617	cg26924967	rs4807507	0.811883	chr19	MRPL54	protein_coding	MRPL54
ENSG00000267594	cg02714994	rs11669449	0.812455	chr19	CYP4F24P	unprocessed_pseudogene	CYP4F24P
ENSG00000187994	cg25675800	rs8110393	0.812576	chr19	RINL	protein_coding	RINL
ENSG00000073050	cg19308930	rs304729	0.813314	chr19	XRCC1	protein_coding	XRCC1
ENSG00000130803	cg16635176	rs6511889	0.815362	chr19	ZNF317	protein_coding	ZNF317
ENSG00000173875	cg08849657	rs2861405	0.815943	chr19	ZNF791	protein_coding	ZNF791
ENSG00000131849	cg04608855	rs7259841	0.818237	chr19	ZNF132	protein_coding	ZNF132
ENSG00000073050	cg12787665	rs2854497	0.820248	chr19	XRCC1	protein_coding	XRCC1
ENSG00000167460	cg13618979	rs8113101	0.821045	chr19	TPM4	protein_coding	TPM4
ENSG00000173875	cg01111138	rs2861405	0.821255	chr19	ZNF791	protein_coding	ZNF791
ENSG00000173875	cg08574423	rs2861405	0.82318	chr19	ZNF791	protein_coding	ZNF791
ENSG00000173875	cg18469665	rs2861405	0.824561	chr19	ZNF791	protein_coding	ZNF791
ENSG00000127540	cg11906607	rs76421407	0.84487	chr19	UQCR11	protein_coding	UQCR11
ENSG00000167460	cg10823709	rs112634555	0.84584	chr19	TPM4	protein_coding	TPM4
ENSG00000127903	cg09997203	rs10084156	0.84912	chr19	ZNF835	protein_coding	ZNF835
ENSG00000083845	cg19041593	rs1529958	0.84939	chr19	RPS5	protein_coding	RPS5
ENSG00000105755	cg25067547	rs3840942	0.85093	chr19	ETHE1	protein_coding	ETHE1
ENSG00000152454	cg27152930	rs16988298	0.871888	chr19	ZNF256	protein_coding	ZNF256
ENSG00000073050	cg26354599	rs304729	0.874639	chr19	XRCC1	protein_coding	XRCC1
ENSG00000073050	cg21496419	rs2854497	0.886006	chr19	XRCC1	protein_coding	XRCC1
ENSG00000073050	cg04090834	rs2854497	0.886039	chr19	XRCC1	protein_coding	XRCC1
ENSG00000232098	cg03735888	rs3826680	0.907898	chr19	CTD-2619J13.14	lincRNA	CTD-2619J13.14
ENSG00000131849	cg13877915	rs7259841	0.91171	chr19	ZNF132	protein_coding	ZNF132
ENSG00000134324	cg07258474	rs11691889	0.801285	chr2	LPIN1	protein_coding	LPIN1
ENSG00000115685	cg10631368	rs55777737	0.803189	chr2	PPP1R7	protein_coding	PPP1R7
ENSG00000072135	cg14825985	rs112040677	0.803192	chr2	PTPN18	protein_coding	PTPN18
ENSG00000162997	cg07999476	rs111606289	0.803313	chr2	PRORSD1P	transcribed_unitary_pseudogene	PRORSD1P
ENSG00000134324	cg19893438	rs11691889	0.806354	chr2	LPIN1	protein_coding	LPIN1
ENSG00000134324	cg01876978	rs11691889	0.807642	chr2	LPIN1	protein_coding	LPIN1
ENSG00000134324	cg01158574	rs11691889	0.808936	chr2	LPIN1	protein_coding	LPIN1
ENSG00000134324	cg17916490	rs11691889	0.808974	chr2	LPIN1	protein_coding	LPIN1
ENSG00000162994	cg05084827	rs17046778	0.809179	chr2	CLHC1	protein_coding	CLHC1
ENSG00000134324	cg13827224	rs11691889	0.809641	chr2	LPIN1	protein_coding	LPIN1
ENSG00000134324	cg19584871	rs11691889	0.810116	chr2	LPIN1	protein_coding	LPIN1
ENSG00000134324	cg09295081	rs11691889	0.811649	chr2	LPIN1	protein_coding	LPIN1
ENSG00000134324	cg02069619	rs3795974	0.812654	chr2	LPIN1	protein_coding	LPIN1
ENSG00000134324	cg01242772	rs11691889	0.813101	chr2	LPIN1	protein_coding	LPIN1
ENSG00000144043	cg24573743	rs7583998	0.816135	chr2	TEX261	protein_coding	TEX261
ENSG00000072182	cg07959018	rs6436153	0.818665	chr2	ASIC4	protein_coding	ASIC4
ENSG00000231747	cg01804891	rs11678996	0.819519	chr2	AC079922.2	processed_pseudogene	AC079922.2
ENSG00000135925	cg15490781	rs3840475	0.827707	chr2	WNT10A	protein_coding	WNT10A
ENSG00000154518	cg17273725	rs57022618	0.830891	chr2	ATP5G3	protein_coding	ATP5G3
ENSG00000079785	cg18822792	rs73915402	0.832899	chr2	DDX1	protein_coding	DDX1
ENSG00000134324	cg25654774	rs3795974	0.835699	chr2	LPIN1	protein_coding	LPIN1
ENSG00000231747	cg11339384	rs11678996	0.835856	chr2	AC079922.2	processed_pseudogene	AC079922.2
ENSG00000162997	cg06299644	rs111606289	0.836272	chr2	PRORSD1P	transcribed_unitary_pseudogene	PRORSD1P
ENSG00000134324	cg16440984	rs3795974	0.836625	chr2	LPIN1	protein_coding	LPIN1
ENSG00000135925	cg00981994	rs3840475	0.841005	chr2	WNT10A	protein_coding	WNT10A
ENSG00000079785	cg14520482	rs73915402	0.843425	chr2	DDX1	protein_coding	DDX1
ENSG00000231747	cg21086293	rs11678996	0.848082	chr2	AC079922.2	processed_pseudogene	AC079922.2
ENSG00000135925	cg16937778	rs3840475	0.848634	chr2	WNT10A	protein_coding	WNT10A
ENSG00000135925	cg24813176	rs3840475	0.849459	chr2	WNT10A	protein_coding	WNT10A
ENSG00000162994	cg25477606	rs17046778	0.850727	chr2	CLHC1	protein_coding	CLHC1
ENSG00000162994	cg26336264	rs17046778	0.85078	chr2	CLHC1	protein_coding	CLHC1
ENSG00000162994	cg02717117	rs17046778	0.850814	chr2	CLHC1	protein_coding	CLHC1
ENSG00000162994	cg05027052	rs17046778	0.850835	chr2	CLHC1	protein_coding	CLHC1
ENSG00000135925	cg00011225	rs3840475	0.851439	chr2	WNT10A	protein_coding	WNT10A
ENSG00000163093	cg06674089	rs11901329	0.85428	chr2	BBS5	protein_coding	BBS5
ENSG00000079785	cg24674087	rs73915402	0.85555	chr2	DDX1	protein_coding	DDX1
ENSG00000072182	cg02144258	rs56042015	0.856883	chr2	ASIC4	protein_coding	ASIC4
ENSG00000072135	cg18743464	rs112040677	0.860928	chr2	PTPN18	protein_coding	PTPN18
ENSG00000135925	cg20888386	rs3840475	0.861314	chr2	WNT10A	protein_coding	WNT10A
ENSG00000088205	cg23729417	rs11689073	0.865774	chr2	DDX18	protein_coding	DDX18
ENSG00000127824	cg13409952	rs1024131	0.866379	chr2	TUBA4A	protein_coding	TUBA4A
ENSG00000135925	cg22167208	rs3840475	0.86698	chr2	WNT10A	protein_coding	WNT10A
ENSG00000135925	cg14639163	rs3840475	0.867016	chr2	WNT10A	protein_coding	WNT10A
ENSG00000088205	cg09450085	rs11689073	0.86713	chr2	DDX18	protein_coding	DDX18
ENSG00000114978	cg00327537	rs1667601	0.86725	chr2	MOB1A	protein_coding	MOB1A
ENSG00000135925	cg00518417	rs3840475	0.869767	chr2	WNT10A	protein_coding	WNT10A
ENSG00000072182	cg04255268	rs56171119	0.87029	chr2	ASIC4	protein_coding	ASIC4
ENSG00000125618	cg09704166	rs7576384	0.870416	chr2	PAX8	protein_coding	PAX8
ENSG00000125618	cg07594247	rs7576384	0.870483	chr2	PAX8	protein_coding	PAX8
ENSG00000125618	cg23156509	rs7576384	0.870657	chr2	PAX8	protein_coding	PAX8
ENSG00000125618	cg23122642	rs7576384	0.870938	chr2	PAX8	protein_coding	PAX8
ENSG00000125618	cg21482265	rs7576384	0.871079	chr2	PAX8	protein_coding	PAX8
ENSG00000127824	cg22845754	rs1024131	0.871702	chr2	TUBA4A	protein_coding	TUBA4A
ENSG00000125618	cg19083407	rs7576384	0.871712	chr2	PAX8	protein_coding	PAX8
ENSG00000127824	cg00496455	rs2071385	0.871833	chr2	TUBA4A	protein_coding	TUBA4A
ENSG00000125618	cg02675527	rs7576384	0.871886	chr2	PAX8	protein_coding	PAX8
ENSG00000125618	cg11763394	rs7576384	0.871967	chr2	PAX8	protein_coding	PAX8
ENSG00000127824	cg23977332	rs1024131	0.872125	chr2	TUBA4A	protein_coding	TUBA4A
ENSG00000127824	cg01693157	rs939574	0.872454	chr2	TUBA4A	protein_coding	TUBA4A
ENSG00000127824	cg03253255	rs939574	0.872975	chr2	TUBA4A	protein_coding	TUBA4A
ENSG00000127824	cg08378442	rs939574	0.873474	chr2	TUBA4A	protein_coding	TUBA4A
ENSG00000127824	cg16725050	rs939574	0.873485	chr2	TUBA4A	protein_coding	TUBA4A
ENSG00000127824	cg08396863	rs1024131	0.873542	chr2	TUBA4A	protein_coding	TUBA4A
ENSG00000127824	cg11348442	rs939574	0.873602	chr2	TUBA4A	protein_coding	TUBA4A
ENSG00000127824	cg08640923	rs939574	0.873629	chr2	TUBA4A	protein_coding	TUBA4A
ENSG00000135925	cg08243612	rs3840475	0.875348	chr2	WNT10A	protein_coding	WNT10A
ENSG00000127824	cg23933193	rs1024131	0.880118	chr2	TUBA4A	protein_coding	TUBA4A
ENSG00000072182	cg08640923	rs56171119	0.88817	chr2	ASIC4	protein_coding	ASIC4
ENSG00000072182	cg05147735	rs56042015	0.909248	chr2	ASIC4	protein_coding	ASIC4
ENSG00000072135	cg11040329	rs3739123	0.911557	chr2	PTPN18	protein_coding	PTPN18
ENSG00000072135	cg07929412	rs112040677	0.917646	chr2	PTPN18	protein_coding	PTPN18
ENSG00000231133	cg16405557	rs74177992	0.801887	chr20	HAR1B	lincRNA	HAR1B
ENSG00000198276	cg07253808	rs817310	0.804166	chr20	UCKL1	protein_coding	UCKL1
ENSG00000100987	cg08578207	rs6076315	0.806302	chr20	VSX1	protein_coding	VSX1
ENSG00000231133	cg00950650	rs74177992	0.808185	chr20	HAR1B	lincRNA	HAR1B
ENSG00000225978	cg14803910	rs142310542	0.812762	chr20	HAR1A	lincRNA	HAR1A
ENSG00000101198	cg01883482	rs6122416	0.815427	chr20	NKAIN4	protein_coding	NKAIN4
ENSG00000101198	cg14877226	rs6122416	0.817089	chr20	NKAIN4	protein_coding	NKAIN4
ENSG00000100987	cg02631468	rs6076315	0.819153	chr20	VSX1	protein_coding	VSX1
ENSG00000185019	cg05110133	rs13041542	0.827253	chr20	UBOX5	protein_coding	UBOX5
ENSG00000185019	cg02439189	rs13041542	0.827763	chr20	UBOX5	protein_coding	UBOX5
ENSG00000154930	cg02631468	rs7265950	0.829517	chr20	ACSS1	protein_coding	ACSS1
ENSG00000198276	cg03196440	rs817311	0.845739	chr20	UCKL1	protein_coding	UCKL1
ENSG00000198276	cg07255415	rs817310	0.847803	chr20	UCKL1	protein_coding	UCKL1
ENSG00000196421	cg02630914	rs118165004	0.85846	chr20	LINC00176	protein_coding	LINC00176
ENSG00000198276	cg19513877	rs817310	0.866862	chr20	UCKL1	protein_coding	UCKL1
ENSG00000154930	cg22869025	rs7265721	0.882011	chr20	ACSS1	protein_coding	ACSS1
ENSG00000160199	cg08599496	rs1788470	0.806309	chr21	PKNOX1	protein_coding	PKNOX1
ENSG00000157617	cg04135270	rs3746910	0.859425	chr21	C2CD2	protein_coding	C2CD2
ENSG00000186866	cg01840740	rs2330101	0.866611	chr21	POFUT2	protein_coding	POFUT2
ENSG00000142156	cg04493422	rs2277813	0.915038	chr21	COL6A1	protein_coding	COL6A1
ENSG00000099942	cg20278246	rs5761470	0.801873	chr22	CRKL	protein_coding	CRKL
ENSG00000093072	cg02415779	rs17807317	0.812077	chr22	CECR1	protein_coding	CECR1
ENSG00000161149	cg20646217	rs2075269	0.813202	chr22	TUBA3FP	transcribed_unprocessed_pseudogene	TUBA3FP
ENSG00000205593	cg02800051	rs62241231	0.819802	chr22	DENND6B	protein_coding	DENND6B
ENSG00000283406	cg00040575	rs2540634	0.821834	chr22	DGCR5	processed_transcript	DGCR5
ENSG00000205593	cg19546063	rs62241231	0.826846	chr22	DENND6B	protein_coding	DENND6B
ENSG00000100218	cg20919974	rs2301554	0.82961	chr22	RSPH14	protein_coding	RSPH14
ENSG00000100218	cg00097715	rs2301554	0.833039	chr22	RSPH14	protein_coding	RSPH14
ENSG00000093072	cg20339840	rs17807317	0.837308	chr22	CECR1	protein_coding	CECR1
ENSG00000183307	cg19815317	rs62237785	0.839561	chr22	CECR6	protein_coding	CECR6
ENSG00000283406	cg01939668	rs1210641	0.845446	chr22	DGCR5	processed_transcript	DGCR5
ENSG00000100288	cg12490823	rs963980	0.850342	chr22	CHKB	protein_coding	CHKB
ENSG00000069998	cg24435209	rs34610686	0.850526	chr22	CECR5	protein_coding	CECR5
ENSG00000099968	cg08559357	rs725769	0.85195	chr22	BCL2L13	protein_coding	BCL2L13
ENSG00000100218	cg12624750	rs5759600	0.855964	chr22	RSPH14	protein_coding	RSPH14
ENSG00000100288	cg05156901	rs86337	0.856646	chr22	CHKB	protein_coding	CHKB
ENSG00000100218	cg14458815	rs2301554	0.857706	chr22	RSPH14	protein_coding	RSPH14
ENSG00000241832	cg20991802	rs758221	0.863615	chr22	CECR3	lincRNA	CECR3
ENSG00000099954	cg07639287	rs5992034	0.86793	chr22	CECR2	protein_coding	CECR2
ENSG00000205704	cg15373911	rs62240996	0.868485	chr22	LINC00634	unitary_pseudogene	LINC00634
ENSG00000099954	cg00993786	rs5992034	0.8685	chr22	CECR2	protein_coding	CECR2
ENSG00000100218	cg19878762	rs2301554	0.869668	chr22	RSPH14	protein_coding	RSPH14
ENSG00000273000	cg11229267	rs147044233	0.869759	chr22	KB-1572G7.2	processed_transcript	KB-1572G7.2
ENSG00000093072	cg15452366	rs17807317	0.872372	chr22	CECR1	protein_coding	CECR1
ENSG00000093072	cg21538064	rs17807317	0.872375	chr22	CECR1	protein_coding	CECR1
ENSG00000093072	cg22910462	rs17807317	0.872377	chr22	CECR1	protein_coding	CECR1
ENSG00000093072	cg21144941	rs17807317	0.872377	chr22	CECR1	protein_coding	CECR1
ENSG00000093072	cg05193179	rs17807317	0.872378	chr22	CECR1	protein_coding	CECR1
ENSG00000093072	cg27534599	rs17807317	0.872379	chr22	CECR1	protein_coding	CECR1
ENSG00000093072	cg21830459	rs17807317	0.872379	chr22	CECR1	protein_coding	CECR1
ENSG00000093072	cg17333767	rs17807317	0.87238	chr22	CECR1	protein_coding	CECR1
ENSG00000093072	cg01972843	rs17807317	0.872382	chr22	CECR1	protein_coding	CECR1
ENSG00000093072	cg12317346	rs17807317	0.872387	chr22	CECR1	protein_coding	CECR1
ENSG00000093072	cg24127748	rs17807317	0.872394	chr22	CECR1	protein_coding	CECR1
ENSG00000093072	cg13248581	rs17807317	0.872419	chr22	CECR1	protein_coding	CECR1
ENSG00000100034	cg27653384	rs240066	0.874345	chr22	PPM1F	protein_coding	PPM1F
ENSG00000100218	cg15572787	rs5759600	0.879167	chr22	RSPH14	protein_coding	RSPH14
ENSG00000273000	cg26524945	rs147044233	0.881186	chr22	KB-1572G7.2	processed_transcript	KB-1572G7.2
ENSG00000100218	cg14186256	rs5759600	0.881459	chr22	RSPH14	protein_coding	RSPH14
ENSG00000100218	cg18467551	rs2301554	0.883595	chr22	RSPH14	protein_coding	RSPH14
ENSG00000100218	cg24049841	rs2301554	0.884881	chr22	RSPH14	protein_coding	RSPH14
ENSG00000100218	cg21100191	rs5759600	0.885585	chr22	RSPH14	protein_coding	RSPH14
ENSG00000100034	cg03086022	rs240066	0.886914	chr22	PPM1F	protein_coding	PPM1F
ENSG00000161149	cg01529201	rs2075269	0.892792	chr22	TUBA3FP	transcribed_unprocessed_pseudogene	TUBA3FP
ENSG00000100412	cg03806693	rs79013	0.901746	chr22	ACO2	protein_coding	ACO2
ENSG00000183307	cg19678959	rs9606620	0.901843	chr22	CECR6	protein_coding	CECR6
ENSG00000100412	cg14911204	rs79013	0.908107	chr22	ACO2	protein_coding	ACO2
ENSG00000100412	cg08094994	rs79013	0.955672	chr22	ACO2	protein_coding	ACO2
ENSG00000269889	cg27467234	rs28465436	0.80405	chr3	RP11-816J6.3	antisense	RP11-816J6.3
ENSG00000269889	cg05344026	rs28465436	0.804093	chr3	RP11-816J6.3	antisense	RP11-816J6.3
ENSG00000231770	cg15063505	rs7636054	0.808795	chr3	TMEM44-AS1	antisense	TMEM44-AS1
ENSG00000157093	cg21681168	rs33514	0.814362	chr3	LYZL4	protein_coding	LYZL4
ENSG00000157093	cg23983435	rs33514	0.815633	chr3	LYZL4	protein_coding	LYZL4
ENSG00000144959	cg02099877	rs13323236	0.818108	chr3	NCEH1	protein_coding	NCEH1
ENSG00000157093	cg18685394	rs40415	0.818714	chr3	LYZL4	protein_coding	LYZL4
ENSG00000182606	cg00534386	rs6775014	0.823432	chr3	TRAK1	protein_coding	TRAK1
ENSG00000144959	cg05465295	rs13323236	0.82494	chr3	NCEH1	protein_coding	NCEH1
ENSG00000171135	cg08695206	rs279557	0.825788	chr3	JAGN1	protein_coding	JAGN1
ENSG00000163964	cg06172077	rs9850649	0.835398	chr3	PIGX	protein_coding	PIGX
ENSG00000073792	cg11100080	rs4414887	0.838777	chr3	IGF2BP2	protein_coding	IGF2BP2
ENSG00000090520	cg09771827	rs12330397	0.839026	chr3	DNAJB11	protein_coding	DNAJB11
ENSG00000171757	cg03369965	rs9878797	0.841656	chr3	LRRC34	protein_coding	LRRC34
ENSG00000114378	cg10996014	rs138555089	0.846861	chr3	HYAL1	protein_coding	HYAL1
ENSG00000144959	cg26977859	rs4894431	0.853992	chr3	NCEH1	protein_coding	NCEH1
ENSG00000154310	cg18405631	rs13060085	0.855455	chr3	TNIK	protein_coding	TNIK
ENSG00000171757	cg06010307	rs9878797	0.85804	chr3	LRRC34	protein_coding	LRRC34
ENSG00000241570	cg12987312	rs251488	0.85902	chr3	PAQR9-AS1	antisense	PAQR9-AS1
ENSG00000241570	cg19513207	rs251488	0.859589	chr3	PAQR9-AS1	antisense	PAQR9-AS1
ENSG00000241570	cg08113027	rs251488	0.859723	chr3	PAQR9-AS1	antisense	PAQR9-AS1
ENSG00000169087	cg10894164	rs78282526	0.861063	chr3	HSPBAP1	protein_coding	HSPBAP1
ENSG00000251474	cg25441467	rs12631122	0.862998	chr3	RPL32P3	transcribed_unprocessed_pseudogene	RPL32P3
ENSG00000171757	cg13337095	rs9878797	0.871663	chr3	LRRC34	protein_coding	LRRC34
ENSG00000073792	cg05576949	rs4414887	0.874508	chr3	IGF2BP2	protein_coding	IGF2BP2
ENSG00000171757	cg27467234	rs9878797	0.880582	chr3	LRRC34	protein_coding	LRRC34
ENSG00000171757	cg24655016	rs9878797	0.880594	chr3	LRRC34	protein_coding	LRRC34
ENSG00000171757	cg04714994	rs9878797	0.880637	chr3	LRRC34	protein_coding	LRRC34
ENSG00000171757	cg23707559	rs9878797	0.88065	chr3	LRRC34	protein_coding	LRRC34
ENSG00000171757	cg08095637	rs9878797	0.880653	chr3	LRRC34	protein_coding	LRRC34
ENSG00000171757	cg00832555	rs9878797	0.880653	chr3	LRRC34	protein_coding	LRRC34
ENSG00000171757	cg08193579	rs9878797	0.880664	chr3	LRRC34	protein_coding	LRRC34
ENSG00000171757	cg12397426	rs9878797	0.880664	chr3	LRRC34	protein_coding	LRRC34
ENSG00000171757	cg27536453	rs9878797	0.880665	chr3	LRRC34	protein_coding	LRRC34
ENSG00000171757	cg16306190	rs9878797	0.880665	chr3	LRRC34	protein_coding	LRRC34
ENSG00000171757	cg12358524	rs9878797	0.880674	chr3	LRRC34	protein_coding	LRRC34
ENSG00000171757	cg02860240	rs9878797	0.880686	chr3	LRRC34	protein_coding	LRRC34
ENSG00000171757	cg05344026	rs9878797	0.880741	chr3	LRRC34	protein_coding	LRRC34
ENSG00000073792	cg23956648	rs4414887	0.885148	chr3	IGF2BP2	protein_coding	IGF2BP2
ENSG00000163913	cg01620781	rs2260840	0.885171	chr3	IFT122	protein_coding	IFT122
ENSG00000075914	cg08738300	rs6780749	0.929405	chr3	EXOSC7	protein_coding	EXOSC7
ENSG00000124406	cg07557423	rs1460357	0.800285	chr4	ATP8A1	protein_coding	ATP8A1
ENSG00000260641	cg24135849	rs28722480	0.80257	chr4	RP11-1299A16.3	antisense	RP11-1299A16.3
ENSG00000063978	cg08947915	rs3762830	0.808234	chr4	RNF4	protein_coding	RNF4
ENSG00000182168	cg22490991	rs1385669	0.808362	chr4	UNC5C	protein_coding	UNC5C
ENSG00000151725	cg00769632	rs876840	0.818237	chr4	CENPU	protein_coding	CENPU
ENSG00000151725	cg21366198	rs876840	0.818326	chr4	CENPU	protein_coding	CENPU
ENSG00000151725	cg12696601	rs876840	0.818421	chr4	CENPU	protein_coding	CENPU
ENSG00000063978	cg10432947	rs3762830	0.825094	chr4	RNF4	protein_coding	RNF4
ENSG00000182168	cg08624695	rs1385668	0.827821	chr4	UNC5C	protein_coding	UNC5C
ENSG00000124406	cg04868583	rs1460357	0.828382	chr4	ATP8A1	protein_coding	ATP8A1
ENSG00000124406	cg17280671	rs1460357	0.834285	chr4	ATP8A1	protein_coding	ATP8A1
ENSG00000124406	cg03640051	rs1460357	0.834391	chr4	ATP8A1	protein_coding	ATP8A1
ENSG00000124406	cg15927566	rs1460357	0.834718	chr4	ATP8A1	protein_coding	ATP8A1
ENSG00000183783	cg25512518	rs12502623	0.836853	chr4	KCTD8	protein_coding	KCTD8
ENSG00000145214	cg07007312	rs111344337	0.849814	chr4	DGKQ	protein_coding	DGKQ
ENSG00000183783	cg03605164	rs12502623	0.859128	chr4	KCTD8	protein_coding	KCTD8
ENSG00000063978	cg12854167	rs55958805	0.864551	chr4	RNF4	protein_coding	RNF4
ENSG00000145246	cg14559075	rs11724087	0.865021	chr4	ATP10D	protein_coding	ATP10D
ENSG00000145246	cg22764341	rs11724087	0.865286	chr4	ATP10D	protein_coding	ATP10D
ENSG00000063978	cg01542143	rs3762830	0.867228	chr4	RNF4	protein_coding	RNF4
ENSG00000183783	cg00220737	rs12502623	0.871396	chr4	KCTD8	protein_coding	KCTD8
ENSG00000063978	cg13728951	rs3762830	0.897113	chr4	RNF4	protein_coding	RNF4
ENSG00000044115	cg14862678	rs11242437	0.803487	chr5	CTNNA1	protein_coding	CTNNA1
ENSG00000132915	cg02297278	rs173439	0.808802	chr5	PDE6A	protein_coding	PDE6A
ENSG00000164327	cg05015628	rs13184911	0.811053	chr5	RICTOR	protein_coding	RICTOR
ENSG00000164327	cg04869206	rs13184911	0.812211	chr5	RICTOR	protein_coding	RICTOR
ENSG00000250786	cg14487304	rs1706987	0.821546	chr5	SNHG18	lincRNA	SNHG18
ENSG00000165810	cg09661284	rs7379015	0.845313	chr5	BTNL9	protein_coding	BTNL9
ENSG00000228716	cg16993440	rs408626	0.846269	chr5	DHFR	protein_coding	DHFR
ENSG00000112981	cg13313046	rs17637720	0.863193	chr5	NME5	protein_coding	NME5
ENSG00000251141	cg11046421	rs75036127	0.880198	chr5	RP11-53O19.1	antisense	RP11-53O19.1
ENSG00000251141	cg09817018	rs75036127	0.880456	chr5	RP11-53O19.1	antisense	RP11-53O19.1
ENSG00000044115	cg17532812	rs11242437	0.883373	chr5	CTNNA1	protein_coding	CTNNA1
ENSG00000112981	cg17020052	rs17637720	0.893707	chr5	NME5	protein_coding	NME5
ENSG00000044115	cg18417562	rs11242437	0.906849	chr5	CTNNA1	protein_coding	CTNNA1
ENSG00000155846	cg27543327	rs1078324	0.909444	chr5	PPARGC1B	protein_coding	PPARGC1B
ENSG00000044115	cg03315484	rs11242437	0.929376	chr5	CTNNA1	protein_coding	CTNNA1
ENSG00000044115	cg07788111	rs11242437	0.935596	chr5	CTNNA1	protein_coding	CTNNA1
ENSG00000224531	cg20126088	rs74975377	0.827831	chr6	SMIM13	protein_coding	SMIM13
ENSG00000112378	cg16699385	rs678446	0.830313	chr6	PERP	protein_coding	PERP
ENSG00000124523	cg09494860	rs112443954	0.845911	chr6	SIRT5	protein_coding	SIRT5
ENSG00000124523	cg19366958	rs112443954	0.846021	chr6	SIRT5	protein_coding	SIRT5
ENSG00000124523	cg01867632	rs112443954	0.847106	chr6	SIRT5	protein_coding	SIRT5
ENSG00000124523	cg02206980	rs2841506	0.848109	chr6	SIRT5	protein_coding	SIRT5
ENSG00000051620	cg17171485	rs11441776	0.857882	chr6	HEBP2	protein_coding	HEBP2
ENSG00000051620	cg17388039	rs11441776	0.860314	chr6	HEBP2	protein_coding	HEBP2
ENSG00000051620	cg21619059	rs11441776	0.860899	chr6	HEBP2	protein_coding	HEBP2
ENSG00000051620	cg21016503	rs11441776	0.860936	chr6	HEBP2	protein_coding	HEBP2
ENSG00000051620	cg03863486	rs11441776	0.86101	chr6	HEBP2	protein_coding	HEBP2
ENSG00000051620	cg02939918	rs11441776	0.861164	chr6	HEBP2	protein_coding	HEBP2
ENSG00000112378	cg25821223	rs505042	0.86242	chr6	PERP	protein_coding	PERP
ENSG00000024048	cg22792272	rs9394921	0.888435	chr6	UBR2	protein_coding	UBR2
ENSG00000126870	cg11984989	rs844523	0.803317	chr7	WDR60	protein_coding	WDR60
ENSG00000105877	cg04471919	rs2285943	0.804763	chr7	DNAH11	protein_coding	DNAH11
ENSG00000214870	cg17959486	rs1238010	0.805259	chr7	AC004540.5	lincRNA	AC004540.5
ENSG00000197150	cg09215510	rs71539868	0.806281	chr7	ABCB8	protein_coding	ABCB8
ENSG00000157927	cg11594299	rs6463153	0.81022	chr7	RADIL	protein_coding	RADIL
ENSG00000106591	cg15251939	rs647618	0.815302	chr7	MRPL32	protein_coding	MRPL32
ENSG00000105877	cg13901245	rs2285943	0.818087	chr7	DNAH11	protein_coding	DNAH11
ENSG00000002933	cg01106366	rs1108577	0.81831	chr7	TMEM176A	protein_coding	TMEM176A
ENSG00000161036	cg17356898	rs3800988	0.824265	chr7	LRWD1	protein_coding	LRWD1
ENSG00000106263	cg01461420	rs11551167	0.825782	chr7	EIF3B	protein_coding	EIF3B
ENSG00000214870	cg17035412	rs3214198	0.831458	chr7	AC004540.5	lincRNA	AC004540.5
ENSG00000126870	cg21875370	rs842694	0.836138	chr7	WDR60	protein_coding	WDR60
ENSG00000002933	cg10321493	rs741067	0.837217	chr7	TMEM176A	protein_coding	TMEM176A
ENSG00000214870	cg26697320	rs1013688	0.838284	chr7	AC004540.5	lincRNA	AC004540.5
ENSG00000002933	cg05726600	rs1108577	0.839771	chr7	TMEM176A	protein_coding	TMEM176A
ENSG00000160999	cg01723606	rs113764263	0.839963	chr7	SH2B2	protein_coding	SH2B2
ENSG00000127928	cg27496965	rs59805398	0.841227	chr7	GNGT1	protein_coding	GNGT1
ENSG00000105825	cg27496965	rs59805398	0.844528	chr7	TFPI2	protein_coding	TFPI2
ENSG00000249852	cg21001701	rs73669603	0.845298	chr7	AC145676.2	TEC	AC145676.2
ENSG00000127928	cg07603382	rs59805398	0.848099	chr7	GNGT1	protein_coding	GNGT1
ENSG00000106609	cg26879431	rs12532829	0.848227	chr7	TMEM248	protein_coding	TMEM248
ENSG00000126870	cg14451018	rs842694	0.848908	chr7	WDR60	protein_coding	WDR60
ENSG00000105825	cg07603382	rs59805398	0.850681	chr7	TFPI2	protein_coding	TFPI2
ENSG00000126870	cg06933908	rs842694	0.85449	chr7	WDR60	protein_coding	WDR60
ENSG00000160999	cg05253159	rs113764263	0.854997	chr7	SH2B2	protein_coding	SH2B2
ENSG00000127928	cg19645693	rs59805398	0.866943	chr7	GNGT1	protein_coding	GNGT1
ENSG00000106018	cg20830514	rs141903526	0.868424	chr7	VIPR2	protein_coding	VIPR2
ENSG00000105825	cg19645693	rs59805398	0.868856	chr7	TFPI2	protein_coding	TFPI2
ENSG00000188185	cg23523765	rs12701758	0.869864	chr7	LINC00265	lincRNA	LINC00265
ENSG00000188185	cg26260033	rs12701758	0.871352	chr7	LINC00265	lincRNA	LINC00265
ENSG00000106018	cg04525189	rs141903526	0.877049	chr7	VIPR2	protein_coding	VIPR2
ENSG00000233760	cg03724423	rs740187	0.88144	chr7	AC004947.2	lincRNA	AC004947.2
ENSG00000106018	cg08614290	rs141903526	0.884375	chr7	VIPR2	protein_coding	VIPR2
ENSG00000214783	cg03470754	rs77642514	0.884772	chr7	POLR2J4	processed_transcript	POLR2J4
ENSG00000160949	cg16499645	rs7341562	0.800543	chr8	TONSL	protein_coding	TONSL
ENSG00000185122	cg15252652	rs62530368	0.805515	chr8	HSF1	protein_coding	HSF1
ENSG00000147485	cg20480642	rs4573263	0.805812	chr8	PXDNL	protein_coding	PXDNL
ENSG00000147586	cg03301084	rs34908025	0.80735	chr8	MRPS28	protein_coding	MRPS28
ENSG00000185122	cg13287932	rs62530368	0.808973	chr8	HSF1	protein_coding	HSF1
ENSG00000160948	cg11800672	rs190185812	0.813067	chr8	VPS28	protein_coding	VPS28
ENSG00000179698	cg26272248	rs13281660	0.81344	chr8	WDR97	protein_coding	WDR97
ENSG00000147586	cg23057870	rs34908025	0.813914	chr8	MRPS28	protein_coding	MRPS28
ENSG00000160957	cg19996418	rs2306386	0.816191	chr8	RECQL4	protein_coding	RECQL4
ENSG00000147485	cg02090805	rs4573263	0.816606	chr8	PXDNL	protein_coding	PXDNL
ENSG00000160948	cg03065641	rs190185812	0.816661	chr8	VPS28	protein_coding	VPS28
ENSG00000147586	cg17995652	rs34908025	0.818253	chr8	MRPS28	protein_coding	MRPS28
ENSG00000147586	cg18073545	rs34908025	0.818361	chr8	MRPS28	protein_coding	MRPS28
ENSG00000147485	cg17249938	rs4573263	0.820366	chr8	PXDNL	protein_coding	PXDNL
ENSG00000160948	cg04803798	rs190185812	0.821939	chr8	VPS28	protein_coding	VPS28
ENSG00000179698	cg17363688	rs13281660	0.821951	chr8	WDR97	protein_coding	WDR97
ENSG00000147485	cg13492337	rs4573263	0.822711	chr8	PXDNL	protein_coding	PXDNL
ENSG00000261150	cg09565397	rs73715518	0.831757	chr8	EPPK1	protein_coding	EPPK1
ENSG00000160948	cg08969922	rs190185812	0.832092	chr8	VPS28	protein_coding	VPS28
ENSG00000185122	cg02151939	rs62530368	0.83389	chr8	HSF1	protein_coding	HSF1
ENSG00000185122	cg08453238	rs62530368	0.834135	chr8	HSF1	protein_coding	HSF1
ENSG00000160957	cg27298118	rs2306386	0.834939	chr8	RECQL4	protein_coding	RECQL4
ENSG00000185122	cg20329047	rs62530368	0.835202	chr8	HSF1	protein_coding	HSF1
ENSG00000185122	cg20114350	rs62530368	0.839435	chr8	HSF1	protein_coding	HSF1
ENSG00000160948	cg03453890	rs190185812	0.844762	chr8	VPS28	protein_coding	VPS28
ENSG00000160948	cg21205087	rs190185812	0.865715	chr8	VPS28	protein_coding	VPS28
ENSG00000136854	cg06811780	rs2287116	0.801025	chr9	STXBP1	protein_coding	STXBP1
ENSG00000136854	cg13885243	rs12554453	0.80602	chr9	STXBP1	protein_coding	STXBP1
ENSG00000119139	cg14255824	rs7850573	0.809457	chr9	TJP2	protein_coding	TJP2
ENSG00000119139	cg14282632	rs7850573	0.809748	chr9	TJP2	protein_coding	TJP2
ENSG00000119139	cg12512875	rs7850573	0.815261	chr9	TJP2	protein_coding	TJP2
ENSG00000188986	cg14018215	rs28631372	0.817484	chr9	NELFB	protein_coding	NELFB
ENSG00000187024	cg23313665	rs504434	0.818359	chr9	PTRH1	protein_coding	PTRH1
ENSG00000136854	cg13673290	rs2287116	0.820883	chr9	STXBP1	protein_coding	STXBP1
ENSG00000119139	cg12636460	rs7850573	0.828034	chr9	TJP2	protein_coding	TJP2
ENSG00000232850	cg01311102	rs884115	0.828927	chr9	PTGES2-AS1	lincRNA	PTGES2-AS1
ENSG00000262075	cg14418690	rs28595751	0.829411	chr9	DKFZP434A062	lincRNA	DKFZP434A062
ENSG00000136854	cg14525247	rs2287116	0.83058	chr9	STXBP1	protein_coding	STXBP1
ENSG00000197355	cg02516189	rs10870176	0.834315	chr9	UAP1L1	protein_coding	UAP1L1
ENSG00000188986	cg12757178	rs28631372	0.83637	chr9	NELFB	protein_coding	NELFB
ENSG00000188986	cg09381737	rs28631372	0.836726	chr9	NELFB	protein_coding	NELFB
ENSG00000136854	cg13885243	rs2287116	0.838891	chr9	STXBP1	protein_coding	STXBP1
ENSG00000188986	cg13431678	rs28631372	0.843374	chr9	NELFB	protein_coding	NELFB
ENSG00000136854	cg16716563	rs12554453	0.843882	chr9	STXBP1	protein_coding	STXBP1
ENSG00000197355	cg06231995	rs10870176	0.844933	chr9	UAP1L1	protein_coding	UAP1L1
ENSG00000165272	cg11977735	rs517210	0.84579	chr9	AQP3	protein_coding	AQP3
ENSG00000122735	cg09305600	rs1328536	0.846255	chr9	DNAI1	protein_coding	DNAI1
ENSG00000136854	cg14479094	rs12554453	0.848132	chr9	STXBP1	protein_coding	STXBP1
ENSG00000262075	cg14240223	rs28676733	0.848648	chr9	DKFZP434A062	lincRNA	DKFZP434A062
ENSG00000130653	cg21815965	rs10746563	0.849018	chr9	PNPLA7	protein_coding	PNPLA7
ENSG00000188986	cg13389382	rs28631372	0.849214	chr9	NELFB	protein_coding	NELFB
ENSG00000136854	cg13181797	rs12554453	0.850195	chr9	STXBP1	protein_coding	STXBP1
ENSG00000232850	cg10433093	rs884115	0.850222	chr9	PTGES2-AS1	lincRNA	PTGES2-AS1
ENSG00000130653	cg00741582	rs10746563	0.851383	chr9	PNPLA7	protein_coding	PNPLA7
ENSG00000261215	cg07557424	rs913836	0.851519	chr9	RP11-195F19.30	processed_transcript	RP11-195F19.30
ENSG00000197355	cg03040279	rs10870176	0.851963	chr9	UAP1L1	protein_coding	UAP1L1
ENSG00000197355	cg04582938	rs10870176	0.854726	chr9	UAP1L1	protein_coding	UAP1L1
ENSG00000197355	cg03180426	rs10870176	0.855284	chr9	UAP1L1	protein_coding	UAP1L1
ENSG00000197355	cg14006318	rs10870176	0.855628	chr9	UAP1L1	protein_coding	UAP1L1
ENSG00000188986	cg16098750	rs28631372	0.855873	chr9	NELFB	protein_coding	NELFB
ENSG00000136854	cg05809155	rs12554453	0.855954	chr9	STXBP1	protein_coding	STXBP1
ENSG00000187024	cg02535073	rs550045	0.857551	chr9	PTRH1	protein_coding	PTRH1
ENSG00000188986	cg05843848	rs28631372	0.86075	chr9	NELFB	protein_coding	NELFB
ENSG00000188986	cg02956806	rs28631372	0.866503	chr9	NELFB	protein_coding	NELFB
ENSG00000188986	cg14559801	rs28631372	0.868033	chr9	NELFB	protein_coding	NELFB
ENSG00000188986	cg02219116	rs28631372	0.868438	chr9	NELFB	protein_coding	NELFB
ENSG00000188986	cg03183234	rs28631372	0.869512	chr9	NELFB	protein_coding	NELFB
ENSG00000136854	cg01401232	rs2287116	0.869862	chr9	STXBP1	protein_coding	STXBP1
ENSG00000188986	cg04476286	rs28631372	0.871459	chr9	NELFB	protein_coding	NELFB
ENSG00000148339	cg13983182	rs55965570	0.87181	chr9	SLC25A25	protein_coding	SLC25A25
ENSG00000136854	cg06599814	rs2287116	0.874749	chr9	STXBP1	protein_coding	STXBP1
ENSG00000136854	cg09105685	rs2287116	0.87507	chr9	STXBP1	protein_coding	STXBP1
ENSG00000130653	cg01111842	rs10746563	0.877248	chr9	PNPLA7	protein_coding	PNPLA7
ENSG00000136854	cg05600072	rs2287116	0.878946	chr9	STXBP1	protein_coding	STXBP1
ENSG00000136854	cg27014105	rs2287116	0.879107	chr9	STXBP1	protein_coding	STXBP1
ENSG00000224848	cg06894600	rs2165890	0.879504	chr9	RP11-535M15.1	lincRNA	RP11-535M15.1
ENSG00000224848	cg13481969	rs2165890	0.880026	chr9	RP11-535M15.1	lincRNA	RP11-535M15.1
ENSG00000136854	cg09885134	rs2287116	0.880287	chr9	STXBP1	protein_coding	STXBP1
ENSG00000136830	cg05514971	rs2249110	0.880929	chr9	FAM129B	protein_coding	FAM129B
ENSG00000136854	cg17639867	rs2287116	0.881285	chr9	STXBP1	protein_coding	STXBP1
ENSG00000136854	cg07023135	rs2287116	0.881571	chr9	STXBP1	protein_coding	STXBP1
ENSG00000136854	cg09126156	rs2287116	0.882321	chr9	STXBP1	protein_coding	STXBP1
ENSG00000136854	cg00552574	rs2287116	0.882363	chr9	STXBP1	protein_coding	STXBP1
ENSG00000159884	cg03540450	rs34080245	0.892679	chr9	CCDC107	protein_coding	CCDC107
ENSG00000224848	cg00767010	rs2165890	0.895017	chr9	RP11-535M15.1	lincRNA	RP11-535M15.1
ENSG00000148339	cg19151553	rs55965570	0.898042	chr9	SLC25A25	protein_coding	SLC25A25
ENSG00000148339	cg26907379	rs55965570	0.898239	chr9	SLC25A25	protein_coding	SLC25A25
ENSG00000148339	cg14039237	rs55965570	0.898243	chr9	SLC25A25	protein_coding	SLC25A25
ENSG00000148339	cg04509054	rs55965570	0.898297	chr9	SLC25A25	protein_coding	SLC25A25
ENSG00000148339	cg11884704	rs55965570	0.898546	chr9	SLC25A25	protein_coding	SLC25A25
ENSG00000148339	cg14554539	rs55965570	0.89855	chr9	SLC25A25	protein_coding	SLC25A25
ENSG00000224848	cg17475200	rs2165890	0.899071	chr9	RP11-535M15.1	lincRNA	RP11-535M15.1
ENSG00000148339	cg03724308	rs55965570	0.899104	chr9	SLC25A25	protein_coding	SLC25A25
ENSG00000148339	cg05364011	rs55965570	0.899104	chr9	SLC25A25	protein_coding	SLC25A25
ENSG00000148339	cg06384145	rs55965570	0.899111	chr9	SLC25A25	protein_coding	SLC25A25
ENSG00000148339	cg07974520	rs55965570	0.899118	chr9	SLC25A25	protein_coding	SLC25A25
ENSG00000148339	cg15298607	rs55965570	0.899215	chr9	SLC25A25	protein_coding	SLC25A25
ENSG00000148339	cg02361196	rs55965570	0.899275	chr9	SLC25A25	protein_coding	SLC25A25
ENSG00000148339	cg14294859	rs55965570	0.899308	chr9	SLC25A25	protein_coding	SLC25A25
ENSG00000148339	cg14389395	rs55965570	0.899369	chr9	SLC25A25	protein_coding	SLC25A25
ENSG00000148339	cg16083804	rs55965570	0.899496	chr9	SLC25A25	protein_coding	SLC25A25
ENSG00000188986	cg07441684	rs28631372	0.90059	chr9	NELFB	protein_coding	NELFB
ENSG00000148339	cg07954423	rs55965570	0.903328	chr9	SLC25A25	protein_coding	SLC25A25

## Sheet: EM_coloc_SE
E	M	best.snp.EM	PPA.EM	chr	Gene_symbol	Biotype	Target gene based on SE
ENSG00000171603	cg27553947	rs11121497	0.801401	chr1	CLSTN1	protein_coding	CLSTN1
ENSG00000116514	cg06419113	rs194666	0.801944	chr1	RNF19B	protein_coding	RNF19B
ENSG00000171603	cg02634861	rs72855780	0.804114	chr1	CLSTN1	protein_coding	CLSTN1
ENSG00000133059	cg23362667	rs10793727	0.804601	chr1	DSTYK	protein_coding	DSTYK
ENSG00000237950	cg13246856	rs6801	0.810304	chr1	RP11-7O11.3	antisense	RP11-7O11.3
ENSG00000116514	cg04906435	rs8040	0.811188	chr1	RNF19B	protein_coding	RNF19B
ENSG00000143774	cg20999799	rs111433618	0.81353	chr1	GUK1	protein_coding	GUK1
ENSG00000189266	cg04989128	rs55899369	0.81519	chr1	PNRC2	protein_coding	PNRC2
ENSG00000189266	cg26991199	rs55899369	0.821725	chr1	PNRC2	protein_coding	PNRC2
ENSG00000227533	cg06094523	rs200895692	0.823616	chr1	SLC2A1-AS1	lincRNA	SLC2A1-AS1
ENSG00000131238	cg00695362	rs3131654	0.824029	chr1	PPT1	protein_coding	PPT1
ENSG00000229444	cg04693106	rs76760124	0.824105	chr1	RP11-184I16.4	antisense	RP11-184I16.4
ENSG00000126091	cg06322035	rs12024345	0.825269	chr1	ST3GAL3	protein_coding	ST3GAL3
ENSG00000133069	cg08326593	rs1668871	0.825926	chr1	TMCC2	protein_coding	TMCC2
ENSG00000037637	cg05059632	rs11260710	0.827859	chr1	FBXO42	protein_coding	FBXO42
ENSG00000189266	cg26856289	rs75910560	0.830661	chr1	PNRC2	protein_coding	PNRC2
ENSG00000171603	cg06456464	rs72855780	0.83091	chr1	CLSTN1	protein_coding	CLSTN1
ENSG00000133069	cg21545522	rs1668871	0.831872	chr1	TMCC2	protein_coding	TMCC2
ENSG00000116514	cg04906435	rs194647	0.833518	chr1	RNF19B	protein_coding	RNF19B
ENSG00000135744	cg02931783	rs79410167	0.834152	chr1	AGT	protein_coding	AGT
ENSG00000116514	cg10120255	rs194646	0.836065	chr1	RNF19B	protein_coding	RNF19B
ENSG00000116514	cg14806693	rs194647	0.836653	chr1	RNF19B	protein_coding	RNF19B
ENSG00000117408	cg06792911	rs2428956	0.838173	chr1	IPO13	protein_coding	IPO13
ENSG00000189266	cg12569845	rs75910560	0.838242	chr1	PNRC2	protein_coding	PNRC2
ENSG00000189266	cg00693915	rs55899369	0.838409	chr1	PNRC2	protein_coding	PNRC2
ENSG00000189266	cg03384426	rs75910560	0.839202	chr1	PNRC2	protein_coding	PNRC2
ENSG00000189266	cg22358066	rs75910560	0.839392	chr1	PNRC2	protein_coding	PNRC2
ENSG00000189266	cg27409662	rs75910560	0.839457	chr1	PNRC2	protein_coding	PNRC2
ENSG00000116514	cg16007395	rs520309	0.839518	chr1	RNF19B	protein_coding	RNF19B
ENSG00000158109	cg07330442	rs12757620	0.840575	chr1	TPRG1L	protein_coding	TPRG1L
ENSG00000126091	cg20452714	rs12120287	0.840719	chr1	ST3GAL3	protein_coding	ST3GAL3
ENSG00000189266	cg16924704	rs75910560	0.840962	chr1	PNRC2	protein_coding	PNRC2
ENSG00000237950	cg23954153	rs6680421	0.841764	chr1	RP11-7O11.3	antisense	RP11-7O11.3
ENSG00000189266	cg04021497	rs75910560	0.842131	chr1	PNRC2	protein_coding	PNRC2
ENSG00000037637	cg17463745	rs11260710	0.842482	chr1	FBXO42	protein_coding	FBXO42
ENSG00000133069	cg00142815	rs1172113	0.844175	chr1	TMCC2	protein_coding	TMCC2
ENSG00000179743	cg16109817	rs6666548	0.844448	chr1	FLJ37453	antisense	FLJ37453
ENSG00000133069	cg13303403	rs1172113	0.844765	chr1	TMCC2	protein_coding	TMCC2
ENSG00000116675	cg03054432	rs942861	0.846062	chr1	DNAJC6	protein_coding	DNAJC6
ENSG00000189266	cg22359362	rs72540327	0.847282	chr1	PNRC2	protein_coding	PNRC2
ENSG00000133069	cg02716605	rs1172113	0.850316	chr1	TMCC2	protein_coding	TMCC2
ENSG00000237950	cg15962314	rs6801	0.851806	chr1	RP11-7O11.3	antisense	RP11-7O11.3
ENSG00000237950	cg02329117	rs6801	0.852097	chr1	RP11-7O11.3	antisense	RP11-7O11.3
ENSG00000037637	cg03969515	rs35225769	0.852643	chr1	FBXO42	protein_coding	FBXO42
ENSG00000133069	cg25393376	rs1668871	0.853028	chr1	TMCC2	protein_coding	TMCC2
ENSG00000171603	cg24760690	rs11121497	0.854891	chr1	CLSTN1	protein_coding	CLSTN1
ENSG00000116514	cg10120255	rs518440	0.855196	chr1	RNF19B	protein_coding	RNF19B
ENSG00000142632	cg27576785	rs2273312	0.855565	chr1	ARHGEF19	protein_coding	ARHGEF19
ENSG00000171603	cg15411927	rs11121497	0.856031	chr1	CLSTN1	protein_coding	CLSTN1
ENSG00000133069	cg11170025	rs1668871	0.856375	chr1	TMCC2	protein_coding	TMCC2
ENSG00000116514	cg20340029	rs194642	0.860415	chr1	RNF19B	protein_coding	RNF19B
ENSG00000116514	cg26266099	rs194671	0.860449	chr1	RNF19B	protein_coding	RNF19B
ENSG00000142632	cg03969515	rs221063	0.8606	chr1	ARHGEF19	protein_coding	ARHGEF19
ENSG00000198691	cg05390563	rs4612636	0.861256	chr1	ABCA4	protein_coding	ABCA4
ENSG00000227533	cg00568910	rs17387775	0.861424	chr1	SLC2A1-AS1	lincRNA	SLC2A1-AS1
ENSG00000171603	cg02425407	rs12725898	0.862398	chr1	CLSTN1	protein_coding	CLSTN1
ENSG00000133069	cg10768996	rs1172113	0.864102	chr1	TMCC2	protein_coding	TMCC2
ENSG00000037637	cg02987928	rs35225769	0.865823	chr1	FBXO42	protein_coding	FBXO42
ENSG00000037637	cg14429204	rs11260710	0.866098	chr1	FBXO42	protein_coding	FBXO42
ENSG00000171603	cg26899284	rs60044002	0.86687	chr1	CLSTN1	protein_coding	CLSTN1
ENSG00000116514	cg00843917	rs194642	0.866992	chr1	RNF19B	protein_coding	RNF19B
ENSG00000037637	cg03522107	rs35225769	0.867153	chr1	FBXO42	protein_coding	FBXO42
ENSG00000037637	cg20611680	rs41269189	0.867982	chr1	FBXO42	protein_coding	FBXO42
ENSG00000116514	cg03177171	rs8040	0.876134	chr1	RNF19B	protein_coding	RNF19B
ENSG00000158109	cg09269935	rs2244942	0.876578	chr1	TPRG1L	protein_coding	TPRG1L
ENSG00000142632	cg06365898	rs34693808	0.878065	chr1	ARHGEF19	protein_coding	ARHGEF19
ENSG00000171603	cg04254468	rs72855780	0.880343	chr1	CLSTN1	protein_coding	CLSTN1
ENSG00000171603	cg16436377	rs72855780	0.882868	chr1	CLSTN1	protein_coding	CLSTN1
ENSG00000171603	cg11222217	rs72855780	0.883435	chr1	CLSTN1	protein_coding	CLSTN1
ENSG00000179743	cg12651933	rs1995302	0.885028	chr1	FLJ37453	antisense	FLJ37453
ENSG00000227533	cg09824328	rs200895692	0.888048	chr1	SLC2A1-AS1	lincRNA	SLC2A1-AS1
ENSG00000227533	cg00102166	rs17387775	0.890929	chr1	SLC2A1-AS1	lincRNA	SLC2A1-AS1
ENSG00000227533	cg20282814	rs710217	0.893522	chr1	SLC2A1-AS1	lincRNA	SLC2A1-AS1
ENSG00000227533	cg12101479	rs17387775	0.893873	chr1	SLC2A1-AS1	lincRNA	SLC2A1-AS1
ENSG00000227533	cg21615440	rs200895692	0.895386	chr1	SLC2A1-AS1	lincRNA	SLC2A1-AS1
ENSG00000227533	cg03128534	rs710217	0.89641	chr1	SLC2A1-AS1	lincRNA	SLC2A1-AS1
ENSG00000227533	cg07803811	rs710217	0.899172	chr1	SLC2A1-AS1	lincRNA	SLC2A1-AS1
ENSG00000227533	cg06792911	rs17387775	0.901713	chr1	SLC2A1-AS1	lincRNA	SLC2A1-AS1
ENSG00000227533	cg09003612	rs17387775	0.901911	chr1	SLC2A1-AS1	lincRNA	SLC2A1-AS1
ENSG00000227533	cg12656391	rs17387775	0.901911	chr1	SLC2A1-AS1	lincRNA	SLC2A1-AS1
ENSG00000171603	cg01934856	rs72855780	0.901977	chr1	CLSTN1	protein_coding	CLSTN1
ENSG00000158109	cg24312874	rs34128889	0.907998	chr1	TPRG1L	protein_coding	TPRG1L
ENSG00000227533	cg10197057	rs17387775	0.932206	chr1	SLC2A1-AS1	lincRNA	SLC2A1-AS1
ENSG00000067057	cg18166150	rs9423693	0.805645	chr10	PFKP	protein_coding	PFKP
ENSG00000107551	cg27462740	rs11818623	0.806103	chr10	RASSF4	protein_coding	RASSF4
ENSG00000156515	cg06214126	rs61869987	0.810307	chr10	HK1	protein_coding	HK1
ENSG00000198964	cg13949086	rs10508930	0.812039	chr10	SGMS1	protein_coding	SGMS1
ENSG00000197746	cg09726879	rs74980167	0.823096	chr10	PSAP	protein_coding	PSAP
ENSG00000197746	cg26002370	rs74980167	0.824819	chr10	PSAP	protein_coding	PSAP
ENSG00000187553	cg02228714	rs1538648	0.836817	chr10	CYP26C1	protein_coding	CYP26C1
ENSG00000197746	cg06716626	rs74980167	0.841079	chr10	PSAP	protein_coding	PSAP
ENSG00000232656	cg17288694	rs11250244	0.850757	chr10	IDI2-AS1	antisense	IDI2-AS1
ENSG00000232656	cg17318058	rs11250244	0.85295	chr10	IDI2-AS1	antisense	IDI2-AS1
ENSG00000148719	cg17227535	rs7908857	0.867131	chr10	DNAJB12	protein_coding	DNAJB12
ENSG00000198964	cg11724726	rs10508930	0.869198	chr10	SGMS1	protein_coding	SGMS1
ENSG00000197746	cg26002370	rs74673782	0.869376	chr10	PSAP	protein_coding	PSAP
ENSG00000198964	cg10034176	rs10508930	0.869399	chr10	SGMS1	protein_coding	SGMS1
ENSG00000197746	cg05298847	rs74673782	0.871571	chr10	PSAP	protein_coding	PSAP
ENSG00000197746	cg08342763	rs74980167	0.877156	chr10	PSAP	protein_coding	PSAP
ENSG00000198964	cg00936935	rs10508930	0.878097	chr10	SGMS1	protein_coding	SGMS1
ENSG00000197746	cg00428511	rs74673782	0.878336	chr10	PSAP	protein_coding	PSAP
ENSG00000198964	cg16823698	rs10508930	0.883197	chr10	SGMS1	protein_coding	SGMS1
ENSG00000198964	cg17673495	rs10508930	0.898334	chr10	SGMS1	protein_coding	SGMS1
ENSG00000198964	cg20014988	rs10508930	0.898565	chr10	SGMS1	protein_coding	SGMS1
ENSG00000198964	cg13382516	rs10508930	0.898747	chr10	SGMS1	protein_coding	SGMS1
ENSG00000198964	cg05102856	rs10508930	0.899255	chr10	SGMS1	protein_coding	SGMS1
ENSG00000198964	cg24037270	rs10508930	0.899542	chr10	SGMS1	protein_coding	SGMS1
ENSG00000198964	cg17569303	rs10508930	0.899712	chr10	SGMS1	protein_coding	SGMS1
ENSG00000198964	cg11764846	rs10508930	0.899756	chr10	SGMS1	protein_coding	SGMS1
ENSG00000198964	cg15678767	rs10508930	0.900169	chr10	SGMS1	protein_coding	SGMS1
ENSG00000198964	cg13784163	rs10508930	0.900173	chr10	SGMS1	protein_coding	SGMS1
ENSG00000198964	cg07494431	rs10508930	0.900189	chr10	SGMS1	protein_coding	SGMS1
ENSG00000198964	cg14611218	rs10508930	0.900615	chr10	SGMS1	protein_coding	SGMS1
ENSG00000198964	cg03585110	rs10508930	0.900615	chr10	SGMS1	protein_coding	SGMS1
ENSG00000198964	cg00453368	rs10508930	0.900684	chr10	SGMS1	protein_coding	SGMS1
ENSG00000198964	cg22388374	rs10508930	0.900702	chr10	SGMS1	protein_coding	SGMS1
ENSG00000198964	cg00168459	rs10508930	0.900918	chr10	SGMS1	protein_coding	SGMS1
ENSG00000198964	cg10188795	rs10508930	0.901717	chr10	SGMS1	protein_coding	SGMS1
ENSG00000198964	cg09425247	rs10508930	0.902104	chr10	SGMS1	protein_coding	SGMS1
ENSG00000198964	cg08557120	rs10508930	0.902193	chr10	SGMS1	protein_coding	SGMS1
ENSG00000198964	cg08363235	rs10508930	0.902434	chr10	SGMS1	protein_coding	SGMS1
ENSG00000148719	cg08695113	rs67082123	0.93623	chr10	DNAJB12	protein_coding	DNAJB12
ENSG00000162194	cg27305510	rs4489748	0.816562	chr11	LBHD1	protein_coding	LBHD1
ENSG00000162194	cg02375832	rs4489748	0.818179	chr11	LBHD1	protein_coding	LBHD1
ENSG00000245532	cg15119034	rs512715	0.81988	chr11	NEAT1	lincRNA	NEAT1
ENSG00000245532	cg02779691	rs512715	0.821195	chr11	NEAT1	lincRNA	NEAT1
ENSG00000087365	cg13234062	rs34916336	0.822975	chr11	SF3B2	protein_coding	SF3B2
ENSG00000150764	cg03474251	rs34088139	0.823996	chr11	DIXDC1	protein_coding	DIXDC1
ENSG00000166689	cg02095290	rs4757491	0.82802	chr11	PLEKHA7	protein_coding	PLEKHA7
ENSG00000165905	cg24204282	rs56148819	0.833022	chr11	LARGE2	protein_coding	LARGE2
ENSG00000110400	cg09865698	rs12421432	0.833616	chr11	NECTIN1	protein_coding	NECTIN1
ENSG00000166689	cg15306794	rs12288625	0.835383	chr11	PLEKHA7	protein_coding	PLEKHA7
ENSG00000165905	cg05861348	rs56148819	0.835446	chr11	LARGE2	protein_coding	LARGE2
ENSG00000110400	cg01686933	rs10790339	0.837181	chr11	NECTIN1	protein_coding	NECTIN1
ENSG00000110514	cg16983008	rs10501320	0.838692	chr11	MADD	protein_coding	MADD
ENSG00000110514	cg20075042	rs10501320	0.851495	chr11	MADD	protein_coding	MADD
ENSG00000133315	cg05555928	rs683686	0.852405	chr11	MACROD1	protein_coding	MACROD1
ENSG00000110514	cg27221977	rs10501320	0.852945	chr11	MADD	protein_coding	MADD
ENSG00000166689	cg11134966	rs4757479	0.85336	chr11	PLEKHA7	protein_coding	PLEKHA7
ENSG00000110514	cg23350132	rs10501320	0.854723	chr11	MADD	protein_coding	MADD
ENSG00000110514	cg12841566	rs10501320	0.854864	chr11	MADD	protein_coding	MADD
ENSG00000150764	cg18762111	rs34088139	0.857475	chr11	DIXDC1	protein_coding	DIXDC1
ENSG00000175220	cg24317637	rs4606447	0.860069	chr11	ARHGAP1	protein_coding	ARHGAP1
ENSG00000166689	cg01977079	rs4757491	0.860718	chr11	PLEKHA7	protein_coding	PLEKHA7
ENSG00000110436	cg19112204	rs7767	0.861455	chr11	SLC1A2	protein_coding	SLC1A2
ENSG00000110436	cg13971030	rs1173922	0.861551	chr11	SLC1A2	protein_coding	SLC1A2
ENSG00000110436	cg14479638	rs7767	0.862178	chr11	SLC1A2	protein_coding	SLC1A2
ENSG00000166689	cg15378786	rs7926143	0.862306	chr11	PLEKHA7	protein_coding	PLEKHA7
ENSG00000110436	cg27610672	rs7767	0.863567	chr11	SLC1A2	protein_coding	SLC1A2
ENSG00000110436	cg07358852	rs7767	0.863741	chr11	SLC1A2	protein_coding	SLC1A2
ENSG00000110400	cg11899762	rs12421432	0.864661	chr11	NECTIN1	protein_coding	NECTIN1
ENSG00000110400	cg12160211	rs12421432	0.865411	chr11	NECTIN1	protein_coding	NECTIN1
ENSG00000166689	cg15084286	rs34502475	0.865834	chr11	PLEKHA7	protein_coding	PLEKHA7
ENSG00000134569	cg24317637	rs11039026	0.875041	chr11	LRP4	protein_coding	LRP4
ENSG00000139725	cg03141007	rs1168663	0.801562	chr12	RHOF	protein_coding	RHOF
ENSG00000139725	cg26392922	rs712852	0.803479	chr12	RHOF	protein_coding	RHOF
ENSG00000269514	cg16921775	rs4760696	0.818704	chr12	RP11-370I10.12	lincRNA	RP11-370I10.12
ENSG00000256783	cg01843264	rs61945363	0.822618	chr12	RP11-503G7.1	lincRNA	RP11-503G7.1
ENSG00000256783	cg18143359	rs61945363	0.826013	chr12	RP11-503G7.1	lincRNA	RP11-503G7.1
ENSG00000139725	cg00184240	rs1168663	0.83023	chr12	RHOF	protein_coding	RHOF
ENSG00000184271	cg15800091	rs6580803	0.830547	chr12	POU6F1	protein_coding	POU6F1
ENSG00000072609	cg11642324	rs61952781	0.830557	chr12	CHFR	protein_coding	CHFR
ENSG00000090615	cg01688293	rs10781656	0.831466	chr12	GOLGA3	protein_coding	GOLGA3
ENSG00000072609	cg01688293	rs10781656	0.834661	chr12	CHFR	protein_coding	CHFR
ENSG00000090615	cg11642324	rs61952781	0.84049	chr12	GOLGA3	protein_coding	GOLGA3
ENSG00000256783	cg25455773	rs4883598	0.841958	chr12	RP11-503G7.1	lincRNA	RP11-503G7.1
ENSG00000256783	cg01843264	rs4883598	0.84447	chr12	RP11-503G7.1	lincRNA	RP11-503G7.1
ENSG00000256783	cg18143359	rs4883598	0.848763	chr12	RP11-503G7.1	lincRNA	RP11-503G7.1
ENSG00000256875	cg02403232	rs12828534	0.852155	chr12	RP11-503G7.2	lincRNA	RP11-503G7.2
ENSG00000256783	cg27523351	rs61945363	0.852896	chr12	RP11-503G7.1	lincRNA	RP11-503G7.1
ENSG00000166881	cg06400595	rs62621200	0.853564	chr12	NEMP1	protein_coding	NEMP1
ENSG00000184271	cg13116138	rs7139081	0.853742	chr12	POU6F1	protein_coding	POU6F1
ENSG00000256875	cg18143359	rs12828534	0.854043	chr12	RP11-503G7.2	lincRNA	RP11-503G7.2
ENSG00000256875	cg18143359	rs12301509	0.855425	chr12	RP11-503G7.2	lincRNA	RP11-503G7.2
ENSG00000135457	cg13116138	rs7309374	0.855472	chr12	TFCP2	protein_coding	TFCP2
ENSG00000090615	cg14949892	rs10781656	0.859076	chr12	GOLGA3	protein_coding	GOLGA3
ENSG00000090615	cg15710370	rs61952781	0.859497	chr12	GOLGA3	protein_coding	GOLGA3
ENSG00000072609	cg15710370	rs61952781	0.860449	chr12	CHFR	protein_coding	CHFR
ENSG00000256875	cg27523351	rs12301509	0.86077	chr12	RP11-503G7.2	lincRNA	RP11-503G7.2
ENSG00000072609	cg18066197	rs1564648	0.860878	chr12	CHFR	protein_coding	CHFR
ENSG00000256875	cg20352386	rs12828534	0.861095	chr12	RP11-503G7.2	lincRNA	RP11-503G7.2
ENSG00000072609	cg05237360	rs61952781	0.861801	chr12	CHFR	protein_coding	CHFR
ENSG00000072609	cg14949892	rs10781656	0.863339	chr12	CHFR	protein_coding	CHFR
ENSG00000072609	cg12581980	rs61952781	0.863733	chr12	CHFR	protein_coding	CHFR
ENSG00000090615	cg03279164	rs10781656	0.864282	chr12	GOLGA3	protein_coding	GOLGA3
ENSG00000090615	cg05237360	rs61952781	0.866253	chr12	GOLGA3	protein_coding	GOLGA3
ENSG00000072609	cg03279164	rs10781656	0.867893	chr12	CHFR	protein_coding	CHFR
ENSG00000072609	cg08409956	rs72624274	0.870072	chr12	CHFR	protein_coding	CHFR
ENSG00000090615	cg12581980	rs61952781	0.871136	chr12	GOLGA3	protein_coding	GOLGA3
ENSG00000072609	cg19268599	rs61952781	0.871624	chr12	CHFR	protein_coding	CHFR
ENSG00000256875	cg26621607	rs12301509	0.873762	chr12	RP11-503G7.2	lincRNA	RP11-503G7.2
ENSG00000090615	cg19268599	rs61952781	0.873886	chr12	GOLGA3	protein_coding	GOLGA3
ENSG00000090615	cg08409956	rs72624274	0.873991	chr12	GOLGA3	protein_coding	GOLGA3
ENSG00000072609	cg16300310	rs10781656	0.877093	chr12	CHFR	protein_coding	CHFR
ENSG00000072609	cg06119275	rs61952781	0.879904	chr12	CHFR	protein_coding	CHFR
ENSG00000090615	cg16300310	rs10781656	0.880639	chr12	GOLGA3	protein_coding	GOLGA3
ENSG00000072609	cg23149010	rs61952781	0.881199	chr12	CHFR	protein_coding	CHFR
ENSG00000072609	cg17092099	rs72624274	0.88188	chr12	CHFR	protein_coding	CHFR
ENSG00000090615	cg06119275	rs10781656	0.882753	chr12	GOLGA3	protein_coding	GOLGA3
ENSG00000090615	cg23149010	rs61952781	0.883361	chr12	GOLGA3	protein_coding	GOLGA3
ENSG00000072609	cg09904296	rs72624274	0.883962	chr12	CHFR	protein_coding	CHFR
ENSG00000072609	cg03538318	rs61952781	0.884281	chr12	CHFR	protein_coding	CHFR
ENSG00000090615	cg17092099	rs72624274	0.884835	chr12	GOLGA3	protein_coding	GOLGA3
ENSG00000072609	cg12532141	rs10781656	0.885709	chr12	CHFR	protein_coding	CHFR
ENSG00000072609	cg15108326	rs61952781	0.886269	chr12	CHFR	protein_coding	CHFR
ENSG00000090615	cg09904296	rs72624274	0.886695	chr12	GOLGA3	protein_coding	GOLGA3
ENSG00000090615	cg15108326	rs61952781	0.887235	chr12	GOLGA3	protein_coding	GOLGA3
ENSG00000090615	cg03538318	rs61952781	0.887259	chr12	GOLGA3	protein_coding	GOLGA3
ENSG00000090615	cg12532141	rs10781656	0.887512	chr12	GOLGA3	protein_coding	GOLGA3
ENSG00000072609	cg16214937	rs10781656	0.887884	chr12	CHFR	protein_coding	CHFR
ENSG00000072609	cg05625100	rs61952781	0.887923	chr12	CHFR	protein_coding	CHFR
ENSG00000072609	cg08424446	rs61952781	0.888029	chr12	CHFR	protein_coding	CHFR
ENSG00000072609	cg14903202	rs72624274	0.888106	chr12	CHFR	protein_coding	CHFR
ENSG00000072609	cg22844555	rs61952781	0.888513	chr12	CHFR	protein_coding	CHFR
ENSG00000090615	cg08424446	rs61952781	0.888526	chr12	GOLGA3	protein_coding	GOLGA3
ENSG00000072609	cg16120883	rs10781656	0.888731	chr12	CHFR	protein_coding	CHFR
ENSG00000072609	cg19837214	rs61952781	0.888753	chr12	CHFR	protein_coding	CHFR
ENSG00000072609	cg07052262	rs10781656	0.888757	chr12	CHFR	protein_coding	CHFR
ENSG00000072609	cg23470262	rs72624274	0.888815	chr12	CHFR	protein_coding	CHFR
ENSG00000072609	cg23058246	rs61952781	0.888822	chr12	CHFR	protein_coding	CHFR
ENSG00000072609	cg05614952	rs61952781	0.888828	chr12	CHFR	protein_coding	CHFR
ENSG00000072609	cg20765580	rs61952781	0.88883	chr12	CHFR	protein_coding	CHFR
ENSG00000072609	cg13046214	rs61952781	0.888831	chr12	CHFR	protein_coding	CHFR
ENSG00000072609	cg08695912	rs72624274	0.888834	chr12	CHFR	protein_coding	CHFR
ENSG00000072609	cg10388270	rs72624274	0.888835	chr12	CHFR	protein_coding	CHFR
ENSG00000072609	cg16020270	rs72624274	0.888841	chr12	CHFR	protein_coding	CHFR
ENSG00000072609	cg09537870	rs72624274	0.888856	chr12	CHFR	protein_coding	CHFR
ENSG00000072609	cg02243221	rs72624274	0.888882	chr12	CHFR	protein_coding	CHFR
ENSG00000090615	cg14903202	rs61952781	0.889341	chr12	GOLGA3	protein_coding	GOLGA3
ENSG00000090615	cg23470262	rs72624274	0.889354	chr12	GOLGA3	protein_coding	GOLGA3
ENSG00000090615	cg10388270	rs72624274	0.889413	chr12	GOLGA3	protein_coding	GOLGA3
ENSG00000090615	cg23058246	rs61952781	0.889413	chr12	GOLGA3	protein_coding	GOLGA3
ENSG00000072609	cg03425615	rs61952781	0.889456	chr12	CHFR	protein_coding	CHFR
ENSG00000090615	cg16214937	rs10781656	0.889466	chr12	GOLGA3	protein_coding	GOLGA3
ENSG00000090615	cg05614952	rs61952781	0.88947	chr12	GOLGA3	protein_coding	GOLGA3
ENSG00000072609	cg22149555	rs72624274	0.889611	chr12	CHFR	protein_coding	CHFR
ENSG00000090615	cg05625100	rs61952781	0.889632	chr12	GOLGA3	protein_coding	GOLGA3
ENSG00000090615	cg22844555	rs61952781	0.88965	chr12	GOLGA3	protein_coding	GOLGA3
ENSG00000090615	cg16120883	rs10781656	0.890086	chr12	GOLGA3	protein_coding	GOLGA3
ENSG00000090615	cg07052262	rs10781656	0.890087	chr12	GOLGA3	protein_coding	GOLGA3
ENSG00000090615	cg19837214	rs61952781	0.890101	chr12	GOLGA3	protein_coding	GOLGA3
ENSG00000090615	cg16020270	rs72624274	0.89014	chr12	GOLGA3	protein_coding	GOLGA3
ENSG00000090615	cg09537870	rs72624274	0.890148	chr12	GOLGA3	protein_coding	GOLGA3
ENSG00000090615	cg13046214	rs61952781	0.89015	chr12	GOLGA3	protein_coding	GOLGA3
ENSG00000090615	cg08695912	rs61952781	0.890151	chr12	GOLGA3	protein_coding	GOLGA3
ENSG00000090615	cg20765580	rs10781656	0.890159	chr12	GOLGA3	protein_coding	GOLGA3
ENSG00000090615	cg02243221	rs72624274	0.890181	chr12	GOLGA3	protein_coding	GOLGA3
ENSG00000090615	cg03425615	rs61952781	0.890764	chr12	GOLGA3	protein_coding	GOLGA3
ENSG00000090615	cg22149555	rs72624274	0.89091	chr12	GOLGA3	protein_coding	GOLGA3
ENSG00000072609	cg05626790	rs1564648	0.892976	chr12	CHFR	protein_coding	CHFR
ENSG00000253710	cg02071074	rs73184330	0.818475	chr13	ALG11	protein_coding	ALG11
ENSG00000136144	cg17654199	rs9526577	0.853258	chr13	RCBTB1	protein_coding	RCBTB1
ENSG00000235280	cg04340435	rs3011549	0.875156	chr13	MCF2L-AS1	antisense	MCF2L-AS1
ENSG00000235280	cg10400441	rs3011549	0.87531	chr13	MCF2L-AS1	antisense	MCF2L-AS1
ENSG00000123179	cg20399252	rs7983918	0.876605	chr13	EBPL	protein_coding	EBPL
ENSG00000123179	cg03658251	rs7983918	0.879465	chr13	EBPL	protein_coding	EBPL
ENSG00000123179	cg10201891	rs9568308	0.880903	chr13	EBPL	protein_coding	EBPL
ENSG00000123179	cg04663916	rs7983918	0.888877	chr13	EBPL	protein_coding	EBPL
ENSG00000198208	cg01102856	rs880947	0.802049	chr14	RPS6KL1	protein_coding	RPS6KL1
ENSG00000198208	cg20204167	rs7151535	0.807136	chr14	RPS6KL1	protein_coding	RPS6KL1
ENSG00000198208	cg24119454	rs880947	0.813838	chr14	RPS6KL1	protein_coding	RPS6KL1
ENSG00000100884	cg22775413	rs11847138	0.816778	chr14	CPNE6	protein_coding	CPNE6
ENSG00000198894	cg08198574	rs11624607	0.819879	chr14	CIPC	protein_coding	CIPC
ENSG00000198894	cg23998119	rs61990307	0.827734	chr14	CIPC	protein_coding	CIPC
ENSG00000100577	cg02181287	rs8008449	0.828854	chr14	GSTZ1	protein_coding	GSTZ1
ENSG00000100884	cg21999213	rs62000824	0.832695	chr14	CPNE6	protein_coding	CPNE6
ENSG00000100804	cg25600027	rs8003201	0.842503	chr14	PSMB5	protein_coding	PSMB5
ENSG00000100884	cg23112188	rs12888763	0.848671	chr14	CPNE6	protein_coding	CPNE6
ENSG00000100884	cg00524400	rs3561	0.849217	chr14	CPNE6	protein_coding	CPNE6
ENSG00000100884	cg11479689	rs12888763	0.84951	chr14	CPNE6	protein_coding	CPNE6
ENSG00000258655	cg16488300	rs57278628	0.872808	chr14	ARHGAP5-AS1	antisense	ARHGAP5-AS1
ENSG00000100804	cg05305497	rs8003201	0.882404	chr14	PSMB5	protein_coding	PSMB5
ENSG00000100884	cg13419761	rs12888763	0.889612	chr14	CPNE6	protein_coding	CPNE6
ENSG00000138606	cg04476486	rs60001836	0.839898	chr15	SHF	protein_coding	SHF
ENSG00000138606	cg06548673	rs2292467	0.849639	chr15	SHF	protein_coding	SHF
ENSG00000103966	cg21824733	rs8041458	0.85627	chr15	EHD4	protein_coding	EHD4
ENSG00000138606	cg24139937	rs60001836	0.867591	chr15	SHF	protein_coding	SHF
ENSG00000138606	cg04863377	rs1648316	0.870189	chr15	SHF	protein_coding	SHF
ENSG00000138606	cg20891401	rs12899786	0.888789	chr15	SHF	protein_coding	SHF
ENSG00000138606	cg15395560	rs60001836	0.895683	chr15	SHF	protein_coding	SHF
ENSG00000103966	cg23775236	rs7166358	0.899989	chr15	EHD4	protein_coding	EHD4
ENSG00000109047	cg20207911	rs75438860	0.8012	chr17	RCVRN	protein_coding	RCVRN
ENSG00000247011	cg04016883	rs17620425	0.801512	chr17	RP11-700H6.1	lincRNA	RP11-700H6.1
ENSG00000187824	cg00549475	rs34549011	0.804963	chr17	TMEM220	protein_coding	TMEM220
ENSG00000247011	cg18312989	rs17620425	0.82036	chr17	RP11-700H6.1	lincRNA	RP11-700H6.1
ENSG00000260793	cg13607699	rs113844752	0.827472	chr17	RP5-882C2.2	antisense	RP5-882C2.2
ENSG00000109047	cg26853458	rs62064489	0.831611	chr17	RCVRN	protein_coding	RCVRN
ENSG00000229980	cg00032195	rs12601477	0.841474	chr17	TOB1-AS1	processed_transcript	TOB1-AS1
ENSG00000229980	cg22717211	rs12949115	0.84527	chr17	TOB1-AS1	processed_transcript	TOB1-AS1
ENSG00000229980	cg00001755	rs12601477	0.849833	chr17	TOB1-AS1	processed_transcript	TOB1-AS1
ENSG00000247011	cg14083315	rs17620425	0.858517	chr17	RP11-700H6.1	lincRNA	RP11-700H6.1
ENSG00000247011	cg00979937	rs17620425	0.860885	chr17	RP11-700H6.1	lincRNA	RP11-700H6.1
ENSG00000070495	cg16603176	rs9912009	0.90482	chr17	JMJD6	protein_coding	JMJD6
ENSG00000226742	cg16976594	rs72984258	0.812217	chr18	HSBP1L1	protein_coding	HSBP1L1
ENSG00000226742	cg00363486	rs75395155	0.843063	chr18	HSBP1L1	protein_coding	HSBP1L1
ENSG00000166569	cg26552025	rs11662475	0.85227	chr18	CPLX4	protein_coding	CPLX4
ENSG00000226742	cg12050135	rs4081876	0.87311	chr18	HSBP1L1	protein_coding	HSBP1L1
ENSG00000226742	cg11687085	rs75287701	0.878082	chr18	HSBP1L1	protein_coding	HSBP1L1
ENSG00000141759	cg16553796	rs9946706	0.906086	chr18	TXNL4A	protein_coding	TXNL4A
ENSG00000130164	cg01996497	rs1433099	0.817815	chr19	LDLR	protein_coding	LDLR
ENSG00000080511	cg25580825	rs749261	0.849826	chr19	RDH8	protein_coding	RDH8
ENSG00000130164	cg03293697	rs1433099	0.854491	chr19	LDLR	protein_coding	LDLR
ENSG00000130164	cg24402500	rs1433099	0.855739	chr19	LDLR	protein_coding	LDLR
ENSG00000131401	cg04490979	rs8102164	0.86478	chr19	NAPSB	transcribed_unprocessed_pseudogene	NAPSB
ENSG00000144043	cg24573743	rs7583998	0.816135	chr2	TEX261	protein_coding	TEX261
ENSG00000231747	cg01804891	rs11678996	0.819519	chr2	AC079922.2	processed_pseudogene	AC079922.2
ENSG00000153107	cg26324010	rs12999807	0.821531	chr2	ANAPC1	protein_coding	ANAPC1
ENSG00000153107	cg16771198	rs12999807	0.824104	chr2	ANAPC1	protein_coding	ANAPC1
ENSG00000135925	cg15490781	rs3840475	0.827707	chr2	WNT10A	protein_coding	WNT10A
ENSG00000144136	cg01804891	rs4368335	0.831367	chr2	SLC20A1	protein_coding	SLC20A1
ENSG00000144136	cg26445457	rs4368335	0.833323	chr2	SLC20A1	protein_coding	SLC20A1
ENSG00000231747	cg11339384	rs11678996	0.835856	chr2	AC079922.2	processed_pseudogene	AC079922.2
ENSG00000135925	cg00981994	rs3840475	0.841005	chr2	WNT10A	protein_coding	WNT10A
ENSG00000144043	cg05939956	rs2418653	0.843447	chr2	TEX261	protein_coding	TEX261
ENSG00000144136	cg11339384	rs4368335	0.845107	chr2	SLC20A1	protein_coding	SLC20A1
ENSG00000153107	cg02242681	rs12999807	0.847681	chr2	ANAPC1	protein_coding	ANAPC1
ENSG00000231747	cg21086293	rs11678996	0.848082	chr2	AC079922.2	processed_pseudogene	AC079922.2
ENSG00000135925	cg16937778	rs3840475	0.848634	chr2	WNT10A	protein_coding	WNT10A
ENSG00000135925	cg24813176	rs3840475	0.849459	chr2	WNT10A	protein_coding	WNT10A
ENSG00000135925	cg00011225	rs3840475	0.851439	chr2	WNT10A	protein_coding	WNT10A
ENSG00000144136	cg21086293	rs4368335	0.851954	chr2	SLC20A1	protein_coding	SLC20A1
ENSG00000135925	cg26094599	rs67367269	0.853906	chr2	WNT10A	protein_coding	WNT10A
ENSG00000072182	cg02144258	rs56042015	0.856883	chr2	ASIC4	protein_coding	ASIC4
ENSG00000135925	cg06862374	rs67367269	0.856981	chr2	WNT10A	protein_coding	WNT10A
ENSG00000135925	cg20888386	rs3840475	0.861314	chr2	WNT10A	protein_coding	WNT10A
ENSG00000135925	cg22344703	rs67367269	0.861317	chr2	WNT10A	protein_coding	WNT10A
ENSG00000135925	cg12001120	rs67367269	0.862358	chr2	WNT10A	protein_coding	WNT10A
ENSG00000135925	cg22587479	rs67367269	0.86438	chr2	WNT10A	protein_coding	WNT10A
ENSG00000135925	cg22167208	rs3840475	0.86698	chr2	WNT10A	protein_coding	WNT10A
ENSG00000135925	cg14639163	rs3840475	0.867016	chr2	WNT10A	protein_coding	WNT10A
ENSG00000135925	cg00518417	rs3840475	0.869767	chr2	WNT10A	protein_coding	WNT10A
ENSG00000072182	cg04255268	rs56171119	0.87029	chr2	ASIC4	protein_coding	ASIC4
ENSG00000135925	cg08243612	rs3840475	0.875348	chr2	WNT10A	protein_coding	WNT10A
ENSG00000072182	cg08640923	rs56171119	0.88817	chr2	ASIC4	protein_coding	ASIC4
ENSG00000144136	cg00422909	rs57033895	0.90428	chr2	SLC20A1	protein_coding	SLC20A1
ENSG00000072182	cg05147735	rs56042015	0.909248	chr2	ASIC4	protein_coding	ASIC4
ENSG00000198276	cg07253808	rs817310	0.804166	chr20	UCKL1	protein_coding	UCKL1
ENSG00000198276	cg03196440	rs817311	0.845739	chr20	UCKL1	protein_coding	UCKL1
ENSG00000198276	cg07255415	rs817310	0.847803	chr20	UCKL1	protein_coding	UCKL1
ENSG00000198276	cg19513877	rs817310	0.866862	chr20	UCKL1	protein_coding	UCKL1
ENSG00000157617	cg04135270	rs3746910	0.859425	chr21	C2CD2	protein_coding	C2CD2
ENSG00000183570	cg21461082	rs6518257	0.900985	chr21	PCBP3	protein_coding	PCBP3
ENSG00000100207	cg16296679	rs4822108	0.800086	chr22	TCF20	protein_coding	TCF20
ENSG00000100207	cg27187881	rs2413685	0.844321	chr22	TCF20	protein_coding	TCF20
ENSG00000100207	cg14614102	rs2157298	0.847166	chr22	TCF20	protein_coding	TCF20
ENSG00000241832	cg07056545	rs4819987	0.848901	chr22	CECR3	lincRNA	CECR3
ENSG00000099968	cg08559357	rs725769	0.85195	chr22	BCL2L13	protein_coding	BCL2L13
ENSG00000100207	cg22189786	rs73169171	0.853933	chr22	TCF20	protein_coding	TCF20
ENSG00000099992	cg01884612	rs9606716	0.857898	chr22	TBC1D10A	protein_coding	TBC1D10A
ENSG00000241832	cg27622565	rs4819987	0.862108	chr22	CECR3	lincRNA	CECR3
ENSG00000241832	cg20991802	rs758221	0.863615	chr22	CECR3	lincRNA	CECR3
ENSG00000241832	cg14786340	rs4819987	0.867268	chr22	CECR3	lincRNA	CECR3
ENSG00000099954	cg07639287	rs5992034	0.86793	chr22	CECR2	protein_coding	CECR2
ENSG00000099954	cg00993786	rs5992034	0.8685	chr22	CECR2	protein_coding	CECR2
ENSG00000100412	cg03806693	rs79013	0.901746	chr22	ACO2	protein_coding	ACO2
ENSG00000100412	cg14911204	rs79013	0.908107	chr22	ACO2	protein_coding	ACO2
ENSG00000100412	cg08094994	rs79013	0.955672	chr22	ACO2	protein_coding	ACO2
ENSG00000269889	cg27467234	rs28465436	0.80405	chr3	RP11-816J6.3	antisense	RP11-816J6.3
ENSG00000269889	cg05344026	rs28465436	0.804093	chr3	RP11-816J6.3	antisense	RP11-816J6.3
ENSG00000144959	cg02099877	rs13323236	0.818108	chr3	NCEH1	protein_coding	NCEH1
ENSG00000182606	cg00534386	rs6775014	0.823432	chr3	TRAK1	protein_coding	TRAK1
ENSG00000144959	cg05465295	rs13323236	0.82494	chr3	NCEH1	protein_coding	NCEH1
ENSG00000144959	cg26977859	rs4894431	0.853992	chr3	NCEH1	protein_coding	NCEH1
ENSG00000163913	cg01620781	rs2260840	0.885171	chr3	IFT122	protein_coding	IFT122
ENSG00000124406	cg07557423	rs1460357	0.800285	chr4	ATP8A1	protein_coding	ATP8A1
ENSG00000260641	cg24135849	rs28722480	0.80257	chr4	RP11-1299A16.3	antisense	RP11-1299A16.3
ENSG00000063978	cg00601429	rs143885587	0.804602	chr4	RNF4	protein_coding	RNF4
ENSG00000063978	cg08947915	rs3762830	0.808234	chr4	RNF4	protein_coding	RNF4
ENSG00000182168	cg22490991	rs1385669	0.808362	chr4	UNC5C	protein_coding	UNC5C
ENSG00000182168	cg12468008	rs9993649	0.823953	chr4	UNC5C	protein_coding	UNC5C
ENSG00000063978	cg10432947	rs3762830	0.825094	chr4	RNF4	protein_coding	RNF4
ENSG00000271474	cg12468008	rs1971982	0.825673	chr4	RP11-710C12.1	antisense	RP11-710C12.1
ENSG00000271474	cg17412542	rs1971982	0.826054	chr4	RP11-710C12.1	antisense	RP11-710C12.1
ENSG00000271474	cg24386507	rs1971982	0.82667	chr4	RP11-710C12.1	antisense	RP11-710C12.1
ENSG00000271474	cg13467274	rs17024152	0.826992	chr4	RP11-710C12.1	antisense	RP11-710C12.1
ENSG00000271474	cg08624695	rs17024152	0.827234	chr4	RP11-710C12.1	antisense	RP11-710C12.1
ENSG00000182168	cg08624695	rs1385668	0.827821	chr4	UNC5C	protein_coding	UNC5C
ENSG00000124406	cg04868583	rs1460357	0.828382	chr4	ATP8A1	protein_coding	ATP8A1
ENSG00000182168	cg13467274	rs17024152	0.832894	chr4	UNC5C	protein_coding	UNC5C
ENSG00000124406	cg17280671	rs1460357	0.834285	chr4	ATP8A1	protein_coding	ATP8A1
ENSG00000182168	cg24386507	rs9993649	0.834312	chr4	UNC5C	protein_coding	UNC5C
ENSG00000124406	cg03640051	rs1460357	0.834391	chr4	ATP8A1	protein_coding	ATP8A1
ENSG00000124406	cg15927566	rs1460357	0.834718	chr4	ATP8A1	protein_coding	ATP8A1
ENSG00000182168	cg17412542	rs9993649	0.846136	chr4	UNC5C	protein_coding	UNC5C
ENSG00000063978	cg12854167	rs55958805	0.864551	chr4	RNF4	protein_coding	RNF4
ENSG00000063978	cg01542143	rs3762830	0.867228	chr4	RNF4	protein_coding	RNF4
ENSG00000063978	cg13728951	rs3762830	0.897113	chr4	RNF4	protein_coding	RNF4
ENSG00000164327	cg05015628	rs13184911	0.811053	chr5	RICTOR	protein_coding	RICTOR
ENSG00000164327	cg04869206	rs13184911	0.812211	chr5	RICTOR	protein_coding	RICTOR
ENSG00000224531	cg20126088	rs74975377	0.827831	chr6	SMIM13	protein_coding	SMIM13
ENSG00000048544	cg05345286	rs13217993	0.834789	chr6	MRPS10	protein_coding	MRPS10
ENSG00000048544	cg00558689	rs13217993	0.835412	chr6	MRPS10	protein_coding	MRPS10
ENSG00000048544	cg04496791	rs34442150	0.837757	chr6	MRPS10	protein_coding	MRPS10
ENSG00000024048	cg22792272	rs9394921	0.888435	chr6	UBR2	protein_coding	UBR2
ENSG00000126870	cg11984989	rs844523	0.803317	chr7	WDR60	protein_coding	WDR60
ENSG00000214870	cg17959486	rs1238010	0.805259	chr7	AC004540.5	lincRNA	AC004540.5
ENSG00000055118	cg15104796	rs6953274	0.812333	chr7	KCNH2	protein_coding	KCNH2
ENSG00000214870	cg17035412	rs3214198	0.831458	chr7	AC004540.5	lincRNA	AC004540.5
ENSG00000126870	cg21875370	rs842694	0.836138	chr7	WDR60	protein_coding	WDR60
ENSG00000214870	cg26697320	rs1013688	0.838284	chr7	AC004540.5	lincRNA	AC004540.5
ENSG00000127928	cg27496965	rs59805398	0.841227	chr7	GNGT1	protein_coding	GNGT1
ENSG00000105825	cg27496965	rs59805398	0.844528	chr7	TFPI2	protein_coding	TFPI2
ENSG00000249852	cg21001701	rs73669603	0.845298	chr7	AC145676.2	TEC	AC145676.2
ENSG00000127928	cg07603382	rs59805398	0.848099	chr7	GNGT1	protein_coding	GNGT1
ENSG00000126870	cg14451018	rs842694	0.848908	chr7	WDR60	protein_coding	WDR60
ENSG00000105825	cg07603382	rs59805398	0.850681	chr7	TFPI2	protein_coding	TFPI2
ENSG00000126870	cg06933908	rs842694	0.85449	chr7	WDR60	protein_coding	WDR60
ENSG00000106636	cg12894711	rs62459095	0.862174	chr7	YKT6	protein_coding	YKT6
ENSG00000127928	cg19645693	rs59805398	0.866943	chr7	GNGT1	protein_coding	GNGT1
ENSG00000105825	cg19645693	rs59805398	0.868856	chr7	TFPI2	protein_coding	TFPI2
ENSG00000147586	cg03301084	rs34908025	0.80735	chr8	MRPS28	protein_coding	MRPS28
ENSG00000147586	cg23057870	rs34908025	0.813914	chr8	MRPS28	protein_coding	MRPS28
ENSG00000147586	cg17995652	rs34908025	0.818253	chr8	MRPS28	protein_coding	MRPS28
ENSG00000147586	cg18073545	rs34908025	0.818361	chr8	MRPS28	protein_coding	MRPS28
ENSG00000136854	cg06811780	rs2287116	0.801025	chr9	STXBP1	protein_coding	STXBP1
ENSG00000136854	cg13885243	rs12554453	0.80602	chr9	STXBP1	protein_coding	STXBP1
ENSG00000136908	cg23221813	rs62585306	0.80772	chr9	DPM2	protein_coding	DPM2
ENSG00000136908	cg21181453	rs62585306	0.808012	chr9	DPM2	protein_coding	DPM2
ENSG00000119139	cg14255824	rs7850573	0.809457	chr9	TJP2	protein_coding	TJP2
ENSG00000119139	cg14282632	rs7850573	0.809748	chr9	TJP2	protein_coding	TJP2
ENSG00000136908	cg14507088	rs62585306	0.814573	chr9	DPM2	protein_coding	DPM2
ENSG00000165661	cg16223770	rs36094334	0.815126	chr9	QSOX2	protein_coding	QSOX2
ENSG00000119139	cg12512875	rs7850573	0.815261	chr9	TJP2	protein_coding	TJP2
ENSG00000095397	cg11671947	rs766835	0.819618	chr9	WHRN	protein_coding	WHRN
ENSG00000136854	cg13673290	rs2287116	0.820883	chr9	STXBP1	protein_coding	STXBP1
ENSG00000165661	cg27189554	rs67474143	0.826524	chr9	QSOX2	protein_coding	QSOX2
ENSG00000119139	cg12636460	rs7850573	0.828034	chr9	TJP2	protein_coding	TJP2
ENSG00000262075	cg14418690	rs28595751	0.829411	chr9	DKFZP434A062	lincRNA	DKFZP434A062
ENSG00000136854	cg14525247	rs2287116	0.83058	chr9	STXBP1	protein_coding	STXBP1
ENSG00000136854	cg13885243	rs2287116	0.838891	chr9	STXBP1	protein_coding	STXBP1
ENSG00000136854	cg16716563	rs12554453	0.843882	chr9	STXBP1	protein_coding	STXBP1
ENSG00000165661	cg07405163	rs36094334	0.844531	chr9	QSOX2	protein_coding	QSOX2
ENSG00000136854	cg14479094	rs12554453	0.848132	chr9	STXBP1	protein_coding	STXBP1
ENSG00000262075	cg14240223	rs28676733	0.848648	chr9	DKFZP434A062	lincRNA	DKFZP434A062
ENSG00000136908	cg09665592	rs62585306	0.849215	chr9	DPM2	protein_coding	DPM2
ENSG00000136854	cg13181797	rs12554453	0.850195	chr9	STXBP1	protein_coding	STXBP1
ENSG00000136908	cg10082841	rs73669307	0.854087	chr9	DPM2	protein_coding	DPM2
ENSG00000136854	cg05809155	rs12554453	0.855954	chr9	STXBP1	protein_coding	STXBP1
ENSG00000136854	cg01401232	rs2287116	0.869862	chr9	STXBP1	protein_coding	STXBP1
ENSG00000136854	cg06599814	rs2287116	0.874749	chr9	STXBP1	protein_coding	STXBP1
ENSG00000136854	cg09105685	rs2287116	0.87507	chr9	STXBP1	protein_coding	STXBP1
ENSG00000136854	cg05600072	rs2287116	0.878946	chr9	STXBP1	protein_coding	STXBP1
ENSG00000136854	cg27014105	rs2287116	0.879107	chr9	STXBP1	protein_coding	STXBP1
ENSG00000136854	cg09885134	rs2287116	0.880287	chr9	STXBP1	protein_coding	STXBP1
ENSG00000136854	cg17639867	rs2287116	0.881285	chr9	STXBP1	protein_coding	STXBP1
ENSG00000136854	cg07023135	rs2287116	0.881571	chr9	STXBP1	protein_coding	STXBP1
ENSG00000136854	cg09126156	rs2287116	0.882321	chr9	STXBP1	protein_coding	STXBP1
ENSG00000136854	cg00552574	rs2287116	0.882363	chr9	STXBP1	protein_coding	STXBP1
ENSG00000165661	cg07142627	rs35244336	0.897534	chr9	QSOX2	protein_coding	QSOX2
ENSG00000136908	cg03678049	rs73669307	0.915227	chr9	DPM2	protein_coding	DPM2

## Sheet: EM_coloc_loops
E	M	best.snp.EM	PPA.EM	chr	Gene_symbol	Biotype	Target gene based on loops
ENSG00000171603	cg27553947	rs11121497	0.801401	chr1	CLSTN1	protein_coding	CLSTN1
ENSG00000219481	cg14553527	rs11585710	0.807163	chr1	NBPF1	protein_coding	NBPF1
ENSG00000158006	cg20801718	rs78092370	0.808177	chr1	PAFAH2	protein_coding	PAFAH2
ENSG00000116514	cg04906435	rs8040	0.811188	chr1	RNF19B	protein_coding	RNF19B
ENSG00000090432	cg26474473	rs10916714	0.82426	chr1	MUL1	protein_coding	MUL1
ENSG00000143195	cg25503136	rs6660754	0.826104	chr1	ILDR2	protein_coding	ILDR2
ENSG00000116514	cg04906435	rs194647	0.833518	chr1	RNF19B	protein_coding	RNF19B
ENSG00000116514	cg10120255	rs194646	0.836065	chr1	RNF19B	protein_coding	RNF19B
ENSG00000116514	cg14806693	rs194647	0.836653	chr1	RNF19B	protein_coding	RNF19B
ENSG00000133069	cg00142815	rs1172113	0.844175	chr1	TMCC2	protein_coding	TMCC2
ENSG00000133069	cg13303403	rs1172113	0.844765	chr1	TMCC2	protein_coding	TMCC2
ENSG00000133069	cg02716605	rs1172113	0.850316	chr1	TMCC2	protein_coding	TMCC2
ENSG00000171603	cg24760690	rs11121497	0.854891	chr1	CLSTN1	protein_coding	CLSTN1
ENSG00000171603	cg15411927	rs11121497	0.856031	chr1	CLSTN1	protein_coding	CLSTN1
ENSG00000198691	cg05390563	rs4612636	0.861256	chr1	ABCA4	protein_coding	ABCA4
ENSG00000171603	cg02425407	rs12725898	0.862398	chr1	CLSTN1	protein_coding	CLSTN1
ENSG00000237975	cg23107878	rs12130219	0.862417	chr1	FLG-AS1	antisense	FLG-AS1
ENSG00000133069	cg10768996	rs1172113	0.864102	chr1	TMCC2	protein_coding	TMCC2
ENSG00000219481	cg20065512	rs11585710	0.872619	chr1	NBPF1	protein_coding	NBPF1
ENSG00000066135	cg27033754	rs150936757	0.873481	chr1	KDM4A	protein_coding	KDM4A
ENSG00000066322	cg12656391	rs839752	0.87401	chr1	ELOVL1	protein_coding	ELOVL1
ENSG00000116514	cg03177171	rs8040	0.876134	chr1	RNF19B	protein_coding	RNF19B
ENSG00000049245	cg16833163	rs149492309	0.895109	chr1	VAMP3	protein_coding	VAMP3
ENSG00000156515	cg06214126	rs61869987	0.810307	chr10	HK1	protein_coding	HK1
ENSG00000156515	cg18672115	rs12253517	0.823065	chr10	HK1	protein_coding	HK1
ENSG00000108175	cg16261676	rs61855573	0.844925	chr10	ZMIZ1	protein_coding	ZMIZ1
ENSG00000134824	cg24278870	rs174579	0.802362	chr11	FADS2	protein_coding	FADS2
ENSG00000175115	cg19026260	rs11227439	0.804439	chr11	PACS1	protein_coding	PACS1
ENSG00000110076	cg07675998	rs192133	0.805407	chr11	NRXN2	protein_coding	NRXN2
ENSG00000175115	cg27053618	rs11227439	0.81272	chr11	PACS1	protein_coding	PACS1
ENSG00000110076	cg03968976	rs2360869	0.821403	chr11	NRXN2	protein_coding	NRXN2
ENSG00000175115	cg12405432	rs11227439	0.824922	chr11	PACS1	protein_coding	PACS1
ENSG00000166689	cg02095290	rs4757491	0.82802	chr11	PLEKHA7	protein_coding	PLEKHA7
ENSG00000110076	cg02593704	rs604182	0.829663	chr11	NRXN2	protein_coding	NRXN2
ENSG00000110400	cg09865698	rs12421432	0.833616	chr11	NECTIN1	protein_coding	NECTIN1
ENSG00000166689	cg11134966	rs4757479	0.85336	chr11	PLEKHA7	protein_coding	PLEKHA7
ENSG00000137478	cg22166739	rs1783575	0.857924	chr11	FCHSD2	protein_coding	FCHSD2
ENSG00000166689	cg01977079	rs4757491	0.860718	chr11	PLEKHA7	protein_coding	PLEKHA7
ENSG00000110400	cg11899762	rs12421432	0.864661	chr11	NECTIN1	protein_coding	NECTIN1
ENSG00000110400	cg12160211	rs12421432	0.865411	chr11	NECTIN1	protein_coding	NECTIN1
ENSG00000245532	cg16228688	rs588298	0.902251	chr11	NEAT1	lincRNA	NEAT1
ENSG00000060709	cg03327443	rs11061049	0.820516	chr12	RIMBP2	protein_coding	RIMBP2
ENSG00000072609	cg11642324	rs61952781	0.830557	chr12	CHFR	protein_coding	CHFR
ENSG00000090615	cg01688293	rs10781656	0.831466	chr12	GOLGA3	protein_coding	GOLGA3
ENSG00000176915	cg02726803	rs61951281	0.840306	chr12	ANKLE2	protein_coding	ANKLE2
ENSG00000090615	cg11642324	rs61952781	0.84049	chr12	GOLGA3	protein_coding	GOLGA3
ENSG00000188735	cg26337738	rs56814691	0.846294	chr12	TMEM120B	protein_coding	TMEM120B
ENSG00000176915	cg07702696	rs80024823	0.849446	chr12	ANKLE2	protein_coding	ANKLE2
ENSG00000090615	cg14949892	rs10781656	0.859076	chr12	GOLGA3	protein_coding	GOLGA3
ENSG00000090615	cg15710370	rs61952781	0.859497	chr12	GOLGA3	protein_coding	GOLGA3
ENSG00000072609	cg15710370	rs61952781	0.860449	chr12	CHFR	protein_coding	CHFR
ENSG00000072609	cg05237360	rs61952781	0.861801	chr12	CHFR	protein_coding	CHFR
ENSG00000072609	cg12581980	rs61952781	0.863733	chr12	CHFR	protein_coding	CHFR
ENSG00000090615	cg03279164	rs10781656	0.864282	chr12	GOLGA3	protein_coding	GOLGA3
ENSG00000090615	cg05237360	rs61952781	0.866253	chr12	GOLGA3	protein_coding	GOLGA3
ENSG00000072609	cg08409956	rs72624274	0.870072	chr12	CHFR	protein_coding	CHFR
ENSG00000090615	cg12581980	rs61952781	0.871136	chr12	GOLGA3	protein_coding	GOLGA3
ENSG00000072609	cg19268599	rs61952781	0.871624	chr12	CHFR	protein_coding	CHFR
ENSG00000090615	cg19268599	rs61952781	0.873886	chr12	GOLGA3	protein_coding	GOLGA3
ENSG00000090615	cg08409956	rs72624274	0.873991	chr12	GOLGA3	protein_coding	GOLGA3
ENSG00000196387	cg26620450	rs7138056	0.879531	chr12	ZNF140	protein_coding	ZNF140
ENSG00000072609	cg06119275	rs61952781	0.879904	chr12	CHFR	protein_coding	CHFR
ENSG00000090615	cg16300310	rs10781656	0.880639	chr12	GOLGA3	protein_coding	GOLGA3
ENSG00000072609	cg23149010	rs61952781	0.881199	chr12	CHFR	protein_coding	CHFR
ENSG00000072609	cg17092099	rs72624274	0.88188	chr12	CHFR	protein_coding	CHFR
ENSG00000090615	cg06119275	rs10781656	0.882753	chr12	GOLGA3	protein_coding	GOLGA3
ENSG00000090615	cg23149010	rs61952781	0.883361	chr12	GOLGA3	protein_coding	GOLGA3
ENSG00000072609	cg09904296	rs72624274	0.883962	chr12	CHFR	protein_coding	CHFR
ENSG00000072609	cg03538318	rs61952781	0.884281	chr12	CHFR	protein_coding	CHFR
ENSG00000090615	cg17092099	rs72624274	0.884835	chr12	GOLGA3	protein_coding	GOLGA3
ENSG00000072609	cg15108326	rs61952781	0.886269	chr12	CHFR	protein_coding	CHFR
ENSG00000090615	cg09904296	rs72624274	0.886695	chr12	GOLGA3	protein_coding	GOLGA3
ENSG00000090615	cg15108326	rs61952781	0.887235	chr12	GOLGA3	protein_coding	GOLGA3
ENSG00000090615	cg03538318	rs61952781	0.887259	chr12	GOLGA3	protein_coding	GOLGA3
ENSG00000196387	cg10650853	rs12422899	0.887466	chr12	ZNF140	protein_coding	ZNF140
ENSG00000090615	cg12532141	rs10781656	0.887512	chr12	GOLGA3	protein_coding	GOLGA3
ENSG00000072609	cg05625100	rs61952781	0.887923	chr12	CHFR	protein_coding	CHFR
ENSG00000072609	cg08424446	rs61952781	0.888029	chr12	CHFR	protein_coding	CHFR
ENSG00000072609	cg14903202	rs72624274	0.888106	chr12	CHFR	protein_coding	CHFR
ENSG00000072609	cg22844555	rs61952781	0.888513	chr12	CHFR	protein_coding	CHFR
ENSG00000090615	cg08424446	rs61952781	0.888526	chr12	GOLGA3	protein_coding	GOLGA3
ENSG00000072609	cg19837214	rs61952781	0.888753	chr12	CHFR	protein_coding	CHFR
ENSG00000072609	cg23470262	rs72624274	0.888815	chr12	CHFR	protein_coding	CHFR
ENSG00000072609	cg23058246	rs61952781	0.888822	chr12	CHFR	protein_coding	CHFR
ENSG00000072609	cg05614952	rs61952781	0.888828	chr12	CHFR	protein_coding	CHFR
ENSG00000072609	cg20765580	rs61952781	0.88883	chr12	CHFR	protein_coding	CHFR
ENSG00000072609	cg13046214	rs61952781	0.888831	chr12	CHFR	protein_coding	CHFR
ENSG00000072609	cg08695912	rs72624274	0.888834	chr12	CHFR	protein_coding	CHFR
ENSG00000072609	cg10388270	rs72624274	0.888835	chr12	CHFR	protein_coding	CHFR
ENSG00000072609	cg16020270	rs72624274	0.888841	chr12	CHFR	protein_coding	CHFR
ENSG00000072609	cg09537870	rs72624274	0.888856	chr12	CHFR	protein_coding	CHFR
ENSG00000072609	cg02243221	rs72624274	0.888882	chr12	CHFR	protein_coding	CHFR
ENSG00000090615	cg14903202	rs61952781	0.889341	chr12	GOLGA3	protein_coding	GOLGA3
ENSG00000090615	cg23470262	rs72624274	0.889354	chr12	GOLGA3	protein_coding	GOLGA3
ENSG00000090615	cg10388270	rs72624274	0.889413	chr12	GOLGA3	protein_coding	GOLGA3
ENSG00000090615	cg23058246	rs61952781	0.889413	chr12	GOLGA3	protein_coding	GOLGA3
ENSG00000072609	cg03425615	rs61952781	0.889456	chr12	CHFR	protein_coding	CHFR
ENSG00000090615	cg16214937	rs10781656	0.889466	chr12	GOLGA3	protein_coding	GOLGA3
ENSG00000090615	cg05614952	rs61952781	0.88947	chr12	GOLGA3	protein_coding	GOLGA3
ENSG00000072609	cg22149555	rs72624274	0.889611	chr12	CHFR	protein_coding	CHFR
ENSG00000090615	cg05625100	rs61952781	0.889632	chr12	GOLGA3	protein_coding	GOLGA3
ENSG00000090615	cg22844555	rs61952781	0.88965	chr12	GOLGA3	protein_coding	GOLGA3
ENSG00000090615	cg16120883	rs10781656	0.890086	chr12	GOLGA3	protein_coding	GOLGA3
ENSG00000090615	cg07052262	rs10781656	0.890087	chr12	GOLGA3	protein_coding	GOLGA3
ENSG00000090615	cg19837214	rs61952781	0.890101	chr12	GOLGA3	protein_coding	GOLGA3
ENSG00000090615	cg16020270	rs72624274	0.89014	chr12	GOLGA3	protein_coding	GOLGA3
ENSG00000090615	cg09537870	rs72624274	0.890148	chr12	GOLGA3	protein_coding	GOLGA3
ENSG00000090615	cg13046214	rs61952781	0.89015	chr12	GOLGA3	protein_coding	GOLGA3
ENSG00000090615	cg08695912	rs61952781	0.890151	chr12	GOLGA3	protein_coding	GOLGA3
ENSG00000090615	cg20765580	rs10781656	0.890159	chr12	GOLGA3	protein_coding	GOLGA3
ENSG00000090615	cg02243221	rs72624274	0.890181	chr12	GOLGA3	protein_coding	GOLGA3
ENSG00000090615	cg03425615	rs61952781	0.890764	chr12	GOLGA3	protein_coding	GOLGA3
ENSG00000090615	cg22149555	rs72624274	0.89091	chr12	GOLGA3	protein_coding	GOLGA3
ENSG00000132964	cg02305431	rs3834505	0.837989	chr13	CDK8	protein_coding	CDK8
ENSG00000119650	cg15883154	rs148294734	0.874592	chr14	IFT43	protein_coding	IFT43
ENSG00000138604	cg18605382	rs28638321	0.817637	chr15	GLCE	protein_coding	GLCE
ENSG00000243789	cg23446587	rs72724186	0.82717	chr15	JMJD7	protein_coding	JMJD7
ENSG00000188089	cg17051591	rs701408	0.838282	chr15	PLA2G4E	protein_coding	PLA2G4E
ENSG00000137877	cg26193687	rs1201690	0.843681	chr15	SPTBN5	protein_coding	SPTBN5
ENSG00000128928	cg10821964	rs4924456	0.870322	chr15	IVD	protein_coding	IVD
ENSG00000006007	cg03088525	rs8059797	0.801092	chr16	GDE1	protein_coding	GDE1
ENSG00000179859	cg12779823	rs73237625	0.809184	chr17	AC025335.1	protein_coding	AC025335.1
ENSG00000095066	cg03179980	rs896388	0.80748	chr19	HOOK2	protein_coding	HOOK2
ENSG00000268912	cg13877915	rs10417104	0.884542	chr19	CTD-2619J13.17	lincRNA	CTD-2619J13.17
ENSG00000114999	cg11317677	rs3833479	0.801619	chr2	TTL	protein_coding	TTL
ENSG00000124357	cg19421443	rs66885555	0.809991	chr2	NAGK	protein_coding	NAGK
ENSG00000134324	cg02069619	rs3795974	0.812654	chr2	LPIN1	protein_coding	LPIN1
ENSG00000135925	cg15490781	rs3840475	0.827707	chr2	WNT10A	protein_coding	WNT10A
ENSG00000134324	cg25654774	rs3795974	0.835699	chr2	LPIN1	protein_coding	LPIN1
ENSG00000134324	cg16440984	rs3795974	0.836625	chr2	LPIN1	protein_coding	LPIN1
ENSG00000135925	cg00981994	rs3840475	0.841005	chr2	WNT10A	protein_coding	WNT10A
ENSG00000135925	cg16937778	rs3840475	0.848634	chr2	WNT10A	protein_coding	WNT10A
ENSG00000135925	cg24813176	rs3840475	0.849459	chr2	WNT10A	protein_coding	WNT10A
ENSG00000135925	cg00011225	rs3840475	0.851439	chr2	WNT10A	protein_coding	WNT10A
ENSG00000135925	cg20888386	rs3840475	0.861314	chr2	WNT10A	protein_coding	WNT10A
ENSG00000135925	cg22167208	rs3840475	0.86698	chr2	WNT10A	protein_coding	WNT10A
ENSG00000135925	cg14639163	rs3840475	0.867016	chr2	WNT10A	protein_coding	WNT10A
ENSG00000135925	cg00518417	rs3840475	0.869767	chr2	WNT10A	protein_coding	WNT10A
ENSG00000135925	cg08243612	rs3840475	0.875348	chr2	WNT10A	protein_coding	WNT10A
ENSG00000100983	cg07242267	rs2064453	0.82375	chr20	GSS	protein_coding	GSS
ENSG00000125814	cg12170419	rs999072	0.826861	chr20	NAPB	protein_coding	NAPB
ENSG00000198547	cg15449064	rs35743394	0.835968	chr20	C20orf203	lincRNA	C20orf203
ENSG00000126005	cg06298629	rs73099541	0.84244	chr20	MMP24-AS1	protein_coding	MMP24-AS1
ENSG00000171703	cg08516212	rs35183165	0.868961	chr20	TCEA2	protein_coding	TCEA2
ENSG00000171703	cg10436333	rs35183165	0.871621	chr20	TCEA2	protein_coding	TCEA2
ENSG00000171703	cg02791034	rs35183165	0.880388	chr20	TCEA2	protein_coding	TCEA2
ENSG00000100983	cg21188280	rs114125379	0.885857	chr20	GSS	protein_coding	GSS
ENSG00000198547	cg06335889	rs35743394	0.924939	chr20	C20orf203	lincRNA	C20orf203
ENSG00000100412	cg06330132	rs186698961	0.808845	chr22	ACO2	protein_coding	ACO2
ENSG00000100413	cg06781532	rs132906	0.83735	chr22	POLR3H	protein_coding	POLR3H
ENSG00000100288	cg12490823	rs963980	0.850342	chr22	CHKB	protein_coding	CHKB
ENSG00000100288	cg08260245	rs131753	0.851618	chr22	CHKB	protein_coding	CHKB
ENSG00000100288	cg05156901	rs86337	0.856646	chr22	CHKB	protein_coding	CHKB
ENSG00000128266	cg17564844	rs9612218	0.856896	chr22	GNAZ	protein_coding	GNAZ
ENSG00000128266	cg01237376	rs9612218	0.866315	chr22	GNAZ	protein_coding	GNAZ
ENSG00000128266	cg21330960	rs9612218	0.867698	chr22	GNAZ	protein_coding	GNAZ
ENSG00000100413	cg01066936	rs202634	0.879426	chr22	POLR3H	protein_coding	POLR3H
ENSG00000100027	cg11753051	rs5756181	0.910188	chr22	YPEL1	protein_coding	YPEL1
ENSG00000224086	cg13286281	rs861812	0.923621	chr22	LL22NC03-86G7.1	antisense	LL22NC03-86G7.1
ENSG00000099949	cg07644571	rs178282	0.929613	chr22	LZTR1	protein_coding	LZTR1
ENSG00000163710	cg13457345	rs11708647	0.810304	chr3	PCOLCE2	protein_coding	PCOLCE2
ENSG00000163710	cg01289318	rs4683702	0.811199	chr3	PCOLCE2	protein_coding	PCOLCE2
ENSG00000144959	cg02099877	rs13323236	0.818108	chr3	NCEH1	protein_coding	NCEH1
ENSG00000073792	cg15539508	rs35188816	0.819212	chr3	IGF2BP2	protein_coding	IGF2BP2
ENSG00000144959	cg05465295	rs13323236	0.82494	chr3	NCEH1	protein_coding	NCEH1
ENSG00000073792	cg12934184	rs35188816	0.831398	chr3	IGF2BP2	protein_coding	IGF2BP2
ENSG00000163710	cg22826874	rs4683702	0.838606	chr3	PCOLCE2	protein_coding	PCOLCE2
ENSG00000073792	cg11100080	rs4414887	0.838777	chr3	IGF2BP2	protein_coding	IGF2BP2
ENSG00000073792	cg22500472	rs35188816	0.840258	chr3	IGF2BP2	protein_coding	IGF2BP2
ENSG00000163913	cg25441467	rs57673836	0.8485	chr3	IFT122	protein_coding	IFT122
ENSG00000163918	cg20674424	rs62294449	0.852835	chr3	RFC4	protein_coding	RFC4
ENSG00000073792	cg10586255	rs35188816	0.853812	chr3	IGF2BP2	protein_coding	IGF2BP2
ENSG00000073792	cg09849265	rs35188816	0.853956	chr3	IGF2BP2	protein_coding	IGF2BP2
ENSG00000144959	cg26977859	rs4894431	0.853992	chr3	NCEH1	protein_coding	NCEH1
ENSG00000160145	cg25833543	rs114392312	0.855122	chr3	KALRN	protein_coding	KALRN
ENSG00000154310	cg18405631	rs13060085	0.855455	chr3	TNIK	protein_coding	TNIK
ENSG00000171121	cg17483510	rs8179984	0.855627	chr3	KCNMB3	protein_coding	KCNMB3
ENSG00000144959	cg15681326	rs3850174	0.857374	chr3	NCEH1	protein_coding	NCEH1
ENSG00000188582	cg12987312	rs251488	0.85795	chr3	PAQR9	protein_coding	PAQR9
ENSG00000188582	cg19513207	rs251488	0.858575	chr3	PAQR9	protein_coding	PAQR9
ENSG00000241570	cg12987312	rs251488	0.85902	chr3	PAQR9-AS1	antisense	PAQR9-AS1
ENSG00000241570	cg19513207	rs251488	0.859589	chr3	PAQR9-AS1	antisense	PAQR9-AS1
ENSG00000188582	cg08113027	rs1353887	0.859685	chr3	PAQR9	protein_coding	PAQR9
ENSG00000241570	cg08113027	rs251488	0.859723	chr3	PAQR9-AS1	antisense	PAQR9-AS1
ENSG00000073792	cg00757192	rs35188816	0.861485	chr3	IGF2BP2	protein_coding	IGF2BP2
ENSG00000073792	cg21531679	rs35188816	0.868142	chr3	IGF2BP2	protein_coding	IGF2BP2
ENSG00000073792	cg05576949	rs4414887	0.874508	chr3	IGF2BP2	protein_coding	IGF2BP2
ENSG00000073792	cg07672748	rs35188816	0.88018	chr3	IGF2BP2	protein_coding	IGF2BP2
ENSG00000073792	cg23956648	rs4414887	0.885148	chr3	IGF2BP2	protein_coding	IGF2BP2
ENSG00000163913	cg01620781	rs2260840	0.885171	chr3	IFT122	protein_coding	IFT122
ENSG00000269984	cg19388280	rs7637201	0.90549	chr3	RP11-362K14.5	antisense	RP11-362K14.5
ENSG00000109670	cg12716758	rs11728880	0.833778	chr4	FBXW7	protein_coding	FBXW7
ENSG00000164327	cg05015628	rs13184911	0.811053	chr5	RICTOR	protein_coding	RICTOR
ENSG00000164327	cg04869206	rs13184911	0.812211	chr5	RICTOR	protein_coding	RICTOR
ENSG00000213079	cg14433374	rs9322476	0.803445	chr6	SCAF8	protein_coding	SCAF8
ENSG00000237499	cg11812071	rs10499198	0.811672	chr6	RP11-356I2.4	antisense	RP11-356I2.4
ENSG00000237499	cg04213693	rs2278487	0.816668	chr6	RP11-356I2.4	antisense	RP11-356I2.4
ENSG00000118503	cg25934495	rs12194870	0.819403	chr6	TNFAIP3	protein_coding	TNFAIP3
ENSG00000118503	cg27087787	rs12194870	0.856612	chr6	TNFAIP3	protein_coding	TNFAIP3
ENSG00000237499	cg01981433	rs10499198	0.858491	chr6	RP11-356I2.4	antisense	RP11-356I2.4
ENSG00000237499	cg19862242	rs10499198	0.859694	chr6	RP11-356I2.4	antisense	RP11-356I2.4
ENSG00000118503	cg16174869	rs12194870	0.859791	chr6	TNFAIP3	protein_coding	TNFAIP3
ENSG00000237499	cg25934495	rs10499198	0.860378	chr6	RP11-356I2.4	antisense	RP11-356I2.4
ENSG00000237499	cg22014112	rs10499198	0.861191	chr6	RP11-356I2.4	antisense	RP11-356I2.4
ENSG00000237499	cg10683668	rs10499198	0.862135	chr6	RP11-356I2.4	antisense	RP11-356I2.4
ENSG00000237499	cg16113883	rs10499198	0.862162	chr6	RP11-356I2.4	antisense	RP11-356I2.4
ENSG00000237499	cg10901280	rs10499198	0.862166	chr6	RP11-356I2.4	antisense	RP11-356I2.4
ENSG00000237499	cg18287768	rs10499198	0.862401	chr6	RP11-356I2.4	antisense	RP11-356I2.4
ENSG00000237499	cg26380534	rs10499198	0.865421	chr6	RP11-356I2.4	antisense	RP11-356I2.4
ENSG00000106633	cg09933329	rs12531534	0.819809	chr7	GCK	protein_coding	GCK
ENSG00000214870	cg17035412	rs3214198	0.831458	chr7	AC004540.5	lincRNA	AC004540.5
ENSG00000164683	cg23057870	rs34908025	0.801731	chr8	HEY1	protein_coding	HEY1
ENSG00000164683	cg17995652	rs34908025	0.805011	chr8	HEY1	protein_coding	HEY1
ENSG00000164683	cg18073545	rs34908025	0.805089	chr8	HEY1	protein_coding	HEY1
ENSG00000147485	cg06528306	rs3886248	0.824659	chr8	PXDNL	protein_coding	PXDNL
ENSG00000147485	cg24857620	rs3886248	0.925531	chr8	PXDNL	protein_coding	PXDNL
